# Supplementary material for: A Peptidomics Method for Assessing Sex from Modern and Ancient Bovine Tooth Enamel.
Source: Research Square preprint supplement (doi:10.21203/rs.3.rs-3766361/v1), 2024-01-29
Supplement: Supplementary file 1 [file 088fd99a71ca3f1e9ea9fa29.xlsx]

## Sheet: Summary
Summary:
	1) Input data file: H:\Proteomics\Projects\Boaretto\INCPM_10472\Raw_files\HF1_10472_EBO_22_1_261219.raw
	2) Protein database: H:\Proteomics\Projects\Boaretto\INCPM_18273\AMELs Cattle fasta Pau 2.Fasta
	3) Parameter file: D:\Boaretto\HF1_10472_EBO_22_1_261219.raw_20230417_Amel\objs\params.prf
	4) Date/Time: April 17, 2023 6:49:22 PM IDT
	5) RunTime: 2 hours, 26 minutes, 17 seconds; on 34 cores
Summary Statistics:
	1) Reporting 2 forward and 2 reverse proteins
	2) 1229 unique forward peptides
	3) 2839 spectra matched to forward peptides
	4) Estimated spectrum-level FDR on true proteins is 0.3%
Recorded protein search configuration:
Num	Rule	Value
0	Protein database	H:\Proteomics\Projects\Boaretto\INCPM_18273\AMELs Cattle fasta Pau 2.Fasta
1	Spectrum-level FDR	Auto cut
2	Cleavage residues	KR
3	Digest cutter	C-terminal cutter
4	Peptide termini	Non specific
5	Maximum number of missed cleavages	Any missed cleavages (-1)
6	Precursor tolerance	10.0 ppm
7	Fragment tolerance	frag:qtof_hcd 20.0 ppm
8	Fragment tolerance version	2
9	Charges applied to charge-unassigned spectra:	1,2,3
10	Precursor mass max	7500.0
11	N-glycan search	None
12	O-glycan search	None
13	Off by x isotopes	-2,-1,0,+1,+2
14	Contaminants added	false
15	Decoys added	true
16	%Additional parameters:
17	Disulfide Enable	false
18	Trisulfide Enable	false
19	DSS Crosslink Enable	false
20	Custom Crosslink Enable	false
21	Wildcard Enable	0
22	Combyne cut off score	Auto
23	Protein FDR cutoff	1%
24	Focused DB created	true
25	Export mzIdentML	true
26	Score version	2
27	precursor_assignment_flags	2
28	po_NumberMonosReturn	2
29	Lock mass list	None
30	do_quick_rejects	0
31	%Modification searches:
32	common_modifications_max	2
33	rare_modifications_max	2
34	%Fixed and variable modifications:
35	Oxidation / +15.994915 @ F, H, K, M, P, W, Y | common2
36	Deamidated / +0.984016 @ N, Q, R | common2
37	Acetyl / +42.010565 @ Protein NTerm | rare1
38	Dioxidation / +31.989829 @ F, M, P, W, Y | rare2
39	Gln->pyro-Glu / -17.026549 @ Protein NTerm Q | rare1
40	Glu->pyro-Glu / -18.010565 @ Protein NTerm E | rare1
41	Phospho / +79.966331 @ S | rare1
42	% Custom modification text below
43	%Glycan modifications:
44	% Custom modification text below
45	Show all N-glycopeptides	0
46	%Addition parameters:
47	Product Version	PMI-Byonic-Com:v4.6.1
48	Registered to	david Morgenstern G-INCPM

## Sheet: Spectra
Query #:z	Protein Rank	Peptide < ProteinMetrics Confidential >	Glycans NHFAGNa	Modification Type(s)	Observed m/z	z	Observed (M+H)	Calc. mass (M+H)	Off-by-x error	Mass error (ppm)	Starting position	Cleavage	Score	Delta	Delta Mod	|Log Prob|	# of unique peptides	Protein Name	Protein DB number	Comment	Scan #	Scan Time
19756:4	1	T.W[+15.995]ILF[+31.990]ACLLGAAFSM[+15.995]PLPPHPGHPGYINF.S		F[+32], M[+16], W[+16]	783.392	4	3130.55	3130.53	0	4.7	4	Non	132.9	28.28	6.95	1.91	1032	>sp|P02817|AMELX_BOVIN Amelogenin, X isoform OS=Bos taurus OX=9913 GN=AMELX PE=1 SV=2	1	hf1_10472_ebo_22_1_261219.ScanId;v=1;d1=15515.15515.4	controllerType=0 controllerNumber=1 scan=15515	35.5423
20180:4	1	T.W[+15.995]ILF[+31.990]ACLLGAAFSM[+15.995]PLPPHPGHPGYINF.S		F[+32], M[+16], W[+16]	783.393	4	3130.55	3130.53	0	5.7	4	Non	183.56	14.01	14.01	1.91	1032	>sp|P02817|AMELX_BOVIN Amelogenin, X isoform OS=Bos taurus OX=9913 GN=AMELX PE=1 SV=2	1	hf1_10472_ebo_22_1_261219.ScanId;v=1;d1=15803.15803.4	controllerType=0 controllerNumber=1 scan=15803	36.0347
37207:4	1	F.ACLLGAAF[+15.995]SMPLPPHPGHPGYINFS[+79.966]YEVLTPLKWYQSM.I		F[+16], S[+80]	1083.03	4	4329.08	4329.04	0	9.5	8	Non	184.87	184.87	0	2.74	1032	>sp|P02817|AMELX_BOVIN Amelogenin, X isoform OS=Bos taurus OX=9913 GN=AMELX PE=1 SV=2	1	hf1_10472_ebo_22_1_261219.ScanId;v=1;d1=27289.27289.3	controllerType=0 controllerNumber=1 scan=27289	56.1901
31199:4	1	A.FSM[+31.990]PLP[+31.990]PHPGHPGYINFSYEVLTPLK.W		M[+32], P[+32]	751.368	4	3002.45	3002.48	0	-8.2	15	NRagged	141.36	25.07	9.26	2.11	1032	>sp|P02817|AMELX_BOVIN Amelogenin, X isoform OS=Bos taurus OX=9913 GN=AMELX PE=1 SV=2	1	hf1_10472_ebo_22_1_261219.ScanId;v=1;d1=23309.23309.2	controllerType=0 controllerNumber=1 scan=23309	49.1096
19670:3	1	F.SM[+15.995]PLPPHPGHPGYINF.S		M[+16]	592.96	3	1776.86	1776.85	0	6.8	16	Non	278.27	141.48	78.59	2.9	1032	>sp|P02817|AMELX_BOVIN Amelogenin, X isoform OS=Bos taurus OX=9913 GN=AMELX PE=1 SV=2	1	hf1_10472_ebo_22_1_261219.ScanId;v=1;d1=15458.15458.3	controllerType=0 controllerNumber=1 scan=15458	35.4474
19387:3	1	F.SM[+15.995]PLPPHPGHPGYINF.S		M[+16]	592.959	3	1776.86	1776.85	0	4.9	16	Non	280.8	95.87	95.87	2.52	1032	>sp|P02817|AMELX_BOVIN Amelogenin, X isoform OS=Bos taurus OX=9913 GN=AMELX PE=1 SV=2	1	hf1_10472_ebo_22_1_261219.ScanId;v=1;d1=15254.15254.3	controllerType=0 controllerNumber=1 scan=15254	35.0896
20091:3	1	F.SM[+15.995]PLPPHPGHPGYINF.S		M[+16]	592.96	3	1776.87	1776.85	0	6.9	16	Non	297.3	237.6	46.88	4.12	1032	>sp|P02817|AMELX_BOVIN Amelogenin, X isoform OS=Bos taurus OX=9913 GN=AMELX PE=1 SV=2	1	hf1_10472_ebo_22_1_261219.ScanId;v=1;d1=15746.15746.3	controllerType=0 controllerNumber=1 scan=15746	35.9337
32015:3	1	F.SM[+15.995]PLPPHPGHPGYINFS[+79.966]YEVLTPL.K		M[+16], S[+80]	920.443	3	2759.31	2759.29	0	7	16	Non	156.23	156.23	16.93	2.16	1032	>sp|P02817|AMELX_BOVIN Amelogenin, X isoform OS=Bos taurus OX=9913 GN=AMELX PE=1 SV=2	1	hf1_10472_ebo_22_1_261219.ScanId;v=1;d1=23852.23852.3	controllerType=0 controllerNumber=1 scan=23852	50.0676
32019:3	1	F.SM[+15.995]PLPPHPGHPGYINFS[+79.966]YEVLTPL.K		M[+16], S[+80]	920.443	3	2759.31	2759.29	0	7	16	Non	215.37	215.37	17.12	2.6	1032	>sp|P02817|AMELX_BOVIN Amelogenin, X isoform OS=Bos taurus OX=9913 GN=AMELX PE=1 SV=2	1	hf1_10472_ebo_22_1_261219.ScanId;v=1;d1=23855.23855.3	controllerType=0 controllerNumber=1 scan=23855	50.0721
30124:3	1	F.SMPLPPHPGHPGYINFS[+79.966]YEVLTPLK.W		S[+80]	957.804	3	2871.4	2871.39	0	1.1	16	NRagged	160.75	160.75	47.77	2.34	1032	>sp|P02817|AMELX_BOVIN Amelogenin, X isoform OS=Bos taurus OX=9913 GN=AMELX PE=1 SV=2	1	hf1_10472_ebo_22_1_261219.ScanId;v=1;d1=22565.22565.3	controllerType=0 controllerNumber=1 scan=22565	47.7999
28651:3	1	F.SM[+15.995]PLPPHPGHPGYINFS[+79.966]YEVLTPLK.W		M[+16], S[+80]	963.139	3	2887.4	2887.39	0	4.8	16	NRagged	500.74	500.74	193.97	7.7	1032	>sp|P02817|AMELX_BOVIN Amelogenin, X isoform OS=Bos taurus OX=9913 GN=AMELX PE=1 SV=2	1	hf1_10472_ebo_22_1_261219.ScanId;v=1;d1=21559.21559.3	controllerType=0 controllerNumber=1 scan=21559	46.0401
28051:4	1	F.SM[+15.995]PLPPHPGHPGYINFS[+79.966]YEVLTPLK.W		M[+16], S[+80]	722.606	4	2887.4	2887.39	0	5.2	16	NRagged	503.8	503.8	60.87	7.69	1032	>sp|P02817|AMELX_BOVIN Amelogenin, X isoform OS=Bos taurus OX=9913 GN=AMELX PE=1 SV=2	1	hf1_10472_ebo_22_1_261219.ScanId;v=1;d1=21143.21143.4	controllerType=0 controllerNumber=1 scan=21143	45.3095
27767:3	1	F.SM[+15.995]PLPPHPGHPGYINFS[+79.966]YEVLTPLK.W		M[+16], S[+80]	963.144	3	2887.42	2887.39	0	9.6	16	NRagged	554.6	554.6	193.96	6.63	1032	>sp|P02817|AMELX_BOVIN Amelogenin, X isoform OS=Bos taurus OX=9913 GN=AMELX PE=1 SV=2	1	hf1_10472_ebo_22_1_261219.ScanId;v=1;d1=20943.20943.3	controllerType=0 controllerNumber=1 scan=20943	44.9609
27776:4	1	F.SM[+15.995]PLPPHPGHPGYINFS[+79.966]YEVLTPLK.W		M[+16], S[+80]	722.608	4	2887.41	2887.39	0	7.9	16	NRagged	563.17	563.17	84.96	8.82	1032	>sp|P02817|AMELX_BOVIN Amelogenin, X isoform OS=Bos taurus OX=9913 GN=AMELX PE=1 SV=2	1	hf1_10472_ebo_22_1_261219.ScanId;v=1;d1=20948.20948.4	controllerType=0 controllerNumber=1 scan=20948	44.968
28083:3	1	F.SM[+15.995]PLPPHPGHPGYINFS[+79.966]YEVLTPLK.W		M[+16], S[+80]	963.14	3	2887.4	2887.39	0	5.5	16	NRagged	747.82	747.82	230.78	11.55	1032	>sp|P02817|AMELX_BOVIN Amelogenin, X isoform OS=Bos taurus OX=9913 GN=AMELX PE=1 SV=2	1	hf1_10472_ebo_22_1_261219.ScanId;v=1;d1=21167.21167.3	controllerType=0 controllerNumber=1 scan=21167	45.3492
27807:3	1	F.SM[+15.995]PLPPHPGHPGYINFS[+79.966]YEVLTPLK.W		M[+16], S[+80]	963.141	3	2887.41	2887.39	0	7.2	16	NRagged	778.95	778.95	229.17	12.82	1032	>sp|P02817|AMELX_BOVIN Amelogenin, X isoform OS=Bos taurus OX=9913 GN=AMELX PE=1 SV=2	1	hf1_10472_ebo_22_1_261219.ScanId;v=1;d1=20968.20968.3	controllerType=0 controllerNumber=1 scan=20968	45.0022
30821:4	1	F.SMPLPP[+31.990]HPGHPGYIN[+0.984]FSY[+15.995]EVLTPLK.W		N[+1], P[+32], Y[+16]	710.858	4	2840.41	2840.4	0	5.1	16	NRagged	19.6	19.6	0	2.1	1032	>sp|P02817|AMELX_BOVIN Amelogenin, X isoform OS=Bos taurus OX=9913 GN=AMELX PE=1 SV=2	1	hf1_10472_ebo_22_1_261219.ScanId;v=1;d1=23048.23048.4	controllerType=0 controllerNumber=1 scan=23048	48.6468
29973:4	1	F.SMPLPPHPGHP[+31.990]GY[+31.990]IN[+0.984]FSYEVLTPLK.W		N[+1], P[+32], Y[+32]	714.858	4	2856.41	2856.39	0	6.4	16	NRagged	74.18	74.18	1.27	2.15	1032	>sp|P02817|AMELX_BOVIN Amelogenin, X isoform OS=Bos taurus OX=9913 GN=AMELX PE=1 SV=2	1	hf1_10472_ebo_22_1_261219.ScanId;v=1;d1=22462.22462.4	controllerType=0 controllerNumber=1 scan=22462	47.6171
29041:4	1	F.SM[+31.990]PLPPHPGHPGYIN[+0.984]F[+31.990]SYEVLTPLK.W		F[+32], M[+32], N[+1]	714.855	4	2856.4	2856.39	0	2.8	16	NRagged	90.29	90.29	0	2.11	1032	>sp|P02817|AMELX_BOVIN Amelogenin, X isoform OS=Bos taurus OX=9913 GN=AMELX PE=1 SV=2	1	hf1_10472_ebo_22_1_261219.ScanId;v=1;d1=21829.21829.4	controllerType=0 controllerNumber=1 scan=21829	46.5118
29031:3	1	F.SM[+15.995]PLPPHPGHPGYIN[+0.984]FS[+79.966]YEVLTPLK.W		M[+16], N[+1], S[+80]	963.471	3	2888.4	2888.37	0	8.8	16	NRagged	237.42	237.42	127.14	3.77	1032	>sp|P02817|AMELX_BOVIN Amelogenin, X isoform OS=Bos taurus OX=9913 GN=AMELX PE=1 SV=2	1	hf1_10472_ebo_22_1_261219.ScanId;v=1;d1=21822.21822.3	controllerType=0 controllerNumber=1 scan=21822	46.4985
34911:4	1	F.SM[+15.995]PLPP[+15.995]HPGHPGY[+31.990]INF[+31.990]SYEVLTPLKWY.Q		F[+32], M[+16], P[+16], Y[+32]	809.894	4	3236.55	3236.54	0	4.4	16	Non	144.68	144.68	0	2.41	1032	>sp|P02817|AMELX_BOVIN Amelogenin, X isoform OS=Bos taurus OX=9913 GN=AMELX PE=1 SV=2	1	hf1_10472_ebo_22_1_261219.ScanId;v=1;d1=25783.25783.4	controllerType=0 controllerNumber=1 scan=25783	53.5058
09837:1	1	S.M[+15.995]PLPP.H		M[+16]	570.299	1	570.299	570.296	0	5.5	17	Non	261.5	7.16	7.16	2.12	1032	>sp|P02817|AMELX_BOVIN Amelogenin, X isoform OS=Bos taurus OX=9913 GN=AMELX PE=1 SV=2	1	hf1_10472_ebo_22_1_261219.ScanId;v=1;d1=8799.8799.2	controllerType=0 controllerNumber=1 scan=8799	23.916
05676:1	1	S.M[+15.995]PLPPH.P		M[+16]	707.359	1	707.359	707.355	0	6.4	17	Non	135.61	135.61	30.62	2.1	1032	>sp|P02817|AMELX_BOVIN Amelogenin, X isoform OS=Bos taurus OX=9913 GN=AMELX PE=1 SV=2	1	hf1_10472_ebo_22_1_261219.ScanId;v=1;d1=5971.5971.2	controllerType=0 controllerNumber=1 scan=5971	18.9864
05204:1	1	S.M[+15.995]PLPPH.P		M[+16]	707.359	1	707.359	707.355	0	6.2	17	Non	215.67	215.67	37.76	2.69	1032	>sp|P02817|AMELX_BOVIN Amelogenin, X isoform OS=Bos taurus OX=9913 GN=AMELX PE=1 SV=2	1	hf1_10472_ebo_22_1_261219.ScanId;v=1;d1=5645.5645.2	controllerType=0 controllerNumber=1 scan=5645	18.4094
14872:2	1	S.MPLPPHP.G			394.712	2	788.417	788.412	0	5.6	17	Non	353.7	234.35	234.35	3.44	1032	>sp|P02817|AMELX_BOVIN Amelogenin, X isoform OS=Bos taurus OX=9913 GN=AMELX PE=1 SV=2	1	hf1_10472_ebo_22_1_261219.ScanId;v=1;d1=12197.12197.2	controllerType=0 controllerNumber=1 scan=12197	29.8278
14572:2	1	S.MPLPPHP.G			394.712	2	788.417	788.412	0	5.8	17	Non	411.88	236.52	236.52	3.41	1032	>sp|P02817|AMELX_BOVIN Amelogenin, X isoform OS=Bos taurus OX=9913 GN=AMELX PE=1 SV=2	1	hf1_10472_ebo_22_1_261219.ScanId;v=1;d1=11999.11999.2	controllerType=0 controllerNumber=1 scan=11999	29.4855
15172:2	1	S.MPLPPHP.G			394.712	2	788.417	788.412	0	5.8	17	Non	453.45	225.39	225.39	3.64	1032	>sp|P02817|AMELX_BOVIN Amelogenin, X isoform OS=Bos taurus OX=9913 GN=AMELX PE=1 SV=2	1	hf1_10472_ebo_22_1_261219.ScanId;v=1;d1=12395.12395.2	controllerType=0 controllerNumber=1 scan=12395	30.1689
10575:2	1	S.M[+15.995]PLPPHP.G		M[+16]	402.709	2	804.411	804.407	0	4.9	17	Non	384.29	212.94	77.43	3.39	1032	>sp|P02817|AMELX_BOVIN Amelogenin, X isoform OS=Bos taurus OX=9913 GN=AMELX PE=1 SV=2	1	hf1_10472_ebo_22_1_261219.ScanId;v=1;d1=9294.9294.2	controllerType=0 controllerNumber=1 scan=9294	24.7744
08799:2	1	S.M[+15.995]PLPPHP.G		M[+16]	402.709	2	804.411	804.407	0	5.1	17	Non	407.74	242.67	79.68	3.57	1032	>sp|P02817|AMELX_BOVIN Amelogenin, X isoform OS=Bos taurus OX=9913 GN=AMELX PE=1 SV=2	1	hf1_10472_ebo_22_1_261219.ScanId;v=1;d1=8105.8105.2	controllerType=0 controllerNumber=1 scan=8105	22.7028
10867:2	1	S.M[+15.995]PLPPHP.G		M[+16]	402.709	2	804.412	804.407	0	5.3	17	Non	413.65	272.46	75.81	3.43	1032	>sp|P02817|AMELX_BOVIN Amelogenin, X isoform OS=Bos taurus OX=9913 GN=AMELX PE=1 SV=2	1	hf1_10472_ebo_22_1_261219.ScanId;v=1;d1=9492.9492.2	controllerType=0 controllerNumber=1 scan=9492	25.1187
08509:2	1	S.M[+15.995]PLPPHP.G		M[+16]	402.709	2	804.411	804.407	0	5	17	Non	421.52	232	86.56	3.55	1032	>sp|P02817|AMELX_BOVIN Amelogenin, X isoform OS=Bos taurus OX=9913 GN=AMELX PE=1 SV=2	1	hf1_10472_ebo_22_1_261219.ScanId;v=1;d1=7907.7907.2	controllerType=0 controllerNumber=1 scan=7907	22.3581
10288:2	1	S.M[+15.995]PLPPHP.G		M[+16]	402.709	2	804.412	804.407	0	5.5	17	Non	452.3	272.55	92.95	3.51	1032	>sp|P02817|AMELX_BOVIN Amelogenin, X isoform OS=Bos taurus OX=9913 GN=AMELX PE=1 SV=2	1	hf1_10472_ebo_22_1_261219.ScanId;v=1;d1=9096.9096.2	controllerType=0 controllerNumber=1 scan=9096	24.4299
09990:2	1	S.M[+15.995]PLPPHP.G		M[+16]	402.709	2	804.411	804.407	0	4.7	17	Non	452.95	276.5	86.34	3.66	1032	>sp|P02817|AMELX_BOVIN Amelogenin, X isoform OS=Bos taurus OX=9913 GN=AMELX PE=1 SV=2	1	hf1_10472_ebo_22_1_261219.ScanId;v=1;d1=8898.8898.2	controllerType=0 controllerNumber=1 scan=8898	24.0878
09689:2	1	S.M[+15.995]PLPPHP.G		M[+16]	402.71	2	804.412	804.407	0	6.1	17	Non	453.95	300.04	91.55	3.83	1032	>sp|P02817|AMELX_BOVIN Amelogenin, X isoform OS=Bos taurus OX=9913 GN=AMELX PE=1 SV=2	1	hf1_10472_ebo_22_1_261219.ScanId;v=1;d1=8699.8699.2	controllerType=0 controllerNumber=1 scan=8699	23.7414
09097:2	1	S.M[+15.995]PLPPHP.G		M[+16]	402.709	2	804.412	804.407	0	5.3	17	Non	455	269.77	97.25	3.66	1032	>sp|P02817|AMELX_BOVIN Amelogenin, X isoform OS=Bos taurus OX=9913 GN=AMELX PE=1 SV=2	1	hf1_10472_ebo_22_1_261219.ScanId;v=1;d1=8303.8303.2	controllerType=0 controllerNumber=1 scan=8303	23.0479
09394:2	1	S.M[+15.995]PLPPHP.G		M[+16]	402.71	2	804.412	804.407	0	6.2	17	Non	457.6	302.68	96.18	3.95	1032	>sp|P02817|AMELX_BOVIN Amelogenin, X isoform OS=Bos taurus OX=9913 GN=AMELX PE=1 SV=2	1	hf1_10472_ebo_22_1_261219.ScanId;v=1;d1=8501.8501.2	controllerType=0 controllerNumber=1 scan=8501	23.3953
15848:2	1	S.MPLPPHPG.H			423.223	2	845.439	845.434	0	5.7	17	Non	164.6	164.6	164.6	2.13	1032	>sp|P02817|AMELX_BOVIN Amelogenin, X isoform OS=Bos taurus OX=9913 GN=AMELX PE=1 SV=2	1	hf1_10472_ebo_22_1_261219.ScanId;v=1;d1=12877.12877.2	controllerType=0 controllerNumber=1 scan=12877	30.991
00116:2	1	S.MPLPPHPG.H			423.221	2	845.435	845.434	0	1.4	17	Non	239.49	239.49	239.49	2.14	1032	>sp|P02817|AMELX_BOVIN Amelogenin, X isoform OS=Bos taurus OX=9913 GN=AMELX PE=1 SV=2	1	hf1_10472_ebo_22_1_261219.ScanId;v=1;d1=132.132.2	controllerType=0 controllerNumber=1 scan=132	0.4088
15239:2	1	S.MPLPPHPG.H			423.223	2	845.438	845.434	0	5.1	17	Non	267.74	267.74	267.74	2.92	1032	>sp|P02817|AMELX_BOVIN Amelogenin, X isoform OS=Bos taurus OX=9913 GN=AMELX PE=1 SV=2	1	hf1_10472_ebo_22_1_261219.ScanId;v=1;d1=12441.12441.2	controllerType=0 controllerNumber=1 scan=12441	30.2471
12950:2	1	S.MPLPPHPG.H			423.222	2	845.437	845.434	0	3.8	17	Non	305.74	305.74	305.74	3.05	1032	>sp|P02817|AMELX_BOVIN Amelogenin, X isoform OS=Bos taurus OX=9913 GN=AMELX PE=1 SV=2	1	hf1_10472_ebo_22_1_261219.ScanId;v=1;d1=10925.10925.2	controllerType=0 controllerNumber=1 scan=10925	27.6156
14140:2	1	S.MPLPPHPG.H			423.223	2	845.439	845.434	0	5.9	17	Non	395.54	395.54	395.54	4.74	1032	>sp|P02817|AMELX_BOVIN Amelogenin, X isoform OS=Bos taurus OX=9913 GN=AMELX PE=1 SV=2	1	hf1_10472_ebo_22_1_261219.ScanId;v=1;d1=11713.11713.2	controllerType=0 controllerNumber=1 scan=11713	28.9889
13245:2	1	S.MPLPPHPG.H			423.223	2	845.439	845.434	0	5.6	17	Non	405.17	385.56	385.56	4.74	1032	>sp|P02817|AMELX_BOVIN Amelogenin, X isoform OS=Bos taurus OX=9913 GN=AMELX PE=1 SV=2	1	hf1_10472_ebo_22_1_261219.ScanId;v=1;d1=11125.11125.2	controllerType=0 controllerNumber=1 scan=11125	27.9637
13844:2	1	S.MPLPPHPG.H			423.223	2	845.439	845.434	0	6.4	17	Non	411.96	411.96	411.96	5.23	1032	>sp|P02817|AMELX_BOVIN Amelogenin, X isoform OS=Bos taurus OX=9913 GN=AMELX PE=1 SV=2	1	hf1_10472_ebo_22_1_261219.ScanId;v=1;d1=11515.11515.2	controllerType=0 controllerNumber=1 scan=11515	28.6446
14443:2	1	S.MPLPPHPG.H			423.223	2	845.438	845.434	0	5	17	Non	421.51	416.88	416.88	4.74	1032	>sp|P02817|AMELX_BOVIN Amelogenin, X isoform OS=Bos taurus OX=9913 GN=AMELX PE=1 SV=2	1	hf1_10472_ebo_22_1_261219.ScanId;v=1;d1=11912.11912.2	controllerType=0 controllerNumber=1 scan=11912	29.3362
14742:2	1	S.MPLPPHPG.H			423.223	2	845.438	845.434	0	5.4	17	Non	425.04	336.21	336.21	3.89	1032	>sp|P02817|AMELX_BOVIN Amelogenin, X isoform OS=Bos taurus OX=9913 GN=AMELX PE=1 SV=2	1	hf1_10472_ebo_22_1_261219.ScanId;v=1;d1=12109.12109.2	controllerType=0 controllerNumber=1 scan=12109	29.6777
13543:2	1	S.MPLPPHPG.H			423.223	2	845.439	845.434	0	6.4	17	Non	426.3	424.67	424.67	5.23	1032	>sp|P02817|AMELX_BOVIN Amelogenin, X isoform OS=Bos taurus OX=9913 GN=AMELX PE=1 SV=2	1	hf1_10472_ebo_22_1_261219.ScanId;v=1;d1=11320.11320.2	controllerType=0 controllerNumber=1 scan=11320	28.3047
10377:2	1	S.M[+15.995]PLPPHPG.H		M[+16]	431.221	2	861.434	861.429	0	5.7	17	Non	352.82	282.56	76.38	3.48	1032	>sp|P02817|AMELX_BOVIN Amelogenin, X isoform OS=Bos taurus OX=9913 GN=AMELX PE=1 SV=2	1	hf1_10472_ebo_22_1_261219.ScanId;v=1;d1=9158.9158.2	controllerType=0 controllerNumber=1 scan=9158	24.5357
07590:2	1	S.M[+15.995]PLPPHPG.H		M[+16]	431.22	2	861.433	861.429	0	5.3	17	Non	410.35	335.81	98.1	3.89	1032	>sp|P02817|AMELX_BOVIN Amelogenin, X isoform OS=Bos taurus OX=9913 GN=AMELX PE=1 SV=2	1	hf1_10472_ebo_22_1_261219.ScanId;v=1;d1=7273.7273.2	controllerType=0 controllerNumber=1 scan=7273	21.2532
09325:2	1	S.M[+15.995]PLPPHPG.H		M[+16]	431.221	2	861.435	861.429	0	7.1	17	Non	423.44	391.42	96.9	5.23	1032	>sp|P02817|AMELX_BOVIN Amelogenin, X isoform OS=Bos taurus OX=9913 GN=AMELX PE=1 SV=2	1	hf1_10472_ebo_22_1_261219.ScanId;v=1;d1=8457.8457.2	controllerType=0 controllerNumber=1 scan=8457	23.3183
09030:2	1	S.M[+15.995]PLPPHPG.H		M[+16]	431.221	2	861.434	861.429	0	6	17	Non	426.29	365.78	102.92	4.96	1032	>sp|P02817|AMELX_BOVIN Amelogenin, X isoform OS=Bos taurus OX=9913 GN=AMELX PE=1 SV=2	1	hf1_10472_ebo_22_1_261219.ScanId;v=1;d1=8259.8259.2	controllerType=0 controllerNumber=1 scan=8259	22.9707
08166:2	1	S.M[+15.995]PLPPHPG.H		M[+16]	431.221	2	861.434	861.429	0	6.3	17	Non	432.86	385.83	97.96	5.88	1032	>sp|P02817|AMELX_BOVIN Amelogenin, X isoform OS=Bos taurus OX=9913 GN=AMELX PE=1 SV=2	1	hf1_10472_ebo_22_1_261219.ScanId;v=1;d1=7665.7665.2	controllerType=0 controllerNumber=1 scan=7665	21.9376
08446:2	1	S.M[+15.995]PLPPHPG.H		M[+16]	431.221	2	861.434	861.429	0	5.9	17	Non	440.18	389.85	102.62	5.05	1032	>sp|P02817|AMELX_BOVIN Amelogenin, X isoform OS=Bos taurus OX=9913 GN=AMELX PE=1 SV=2	1	hf1_10472_ebo_22_1_261219.ScanId;v=1;d1=7863.7863.2	controllerType=0 controllerNumber=1 scan=7863	22.2813
09622:2	1	S.M[+15.995]PLPPHPG.H		M[+16]	431.221	2	861.434	861.429	0	6.5	17	Non	446.02	352.4	97.11	4.09	1032	>sp|P02817|AMELX_BOVIN Amelogenin, X isoform OS=Bos taurus OX=9913 GN=AMELX PE=1 SV=2	1	hf1_10472_ebo_22_1_261219.ScanId;v=1;d1=8655.8655.2	controllerType=0 controllerNumber=1 scan=8655	23.6657
07875:2	1	S.M[+15.995]PLPPHPG.H		M[+16]	431.221	2	861.434	861.429	0	6.6	17	Non	448.65	380.89	99.44	5.97	1032	>sp|P02817|AMELX_BOVIN Amelogenin, X isoform OS=Bos taurus OX=9913 GN=AMELX PE=1 SV=2	1	hf1_10472_ebo_22_1_261219.ScanId;v=1;d1=7467.7467.2	controllerType=0 controllerNumber=1 scan=7467	21.5941
08736:2	1	S.M[+15.995]PLPPHPG.H		M[+16]	431.221	2	861.434	861.429	0	6.6	17	Non	448.84	386.07	98.02	5.32	1032	>sp|P02817|AMELX_BOVIN Amelogenin, X isoform OS=Bos taurus OX=9913 GN=AMELX PE=1 SV=2	1	hf1_10472_ebo_22_1_261219.ScanId;v=1;d1=8061.8061.2	controllerType=0 controllerNumber=1 scan=8061	22.6256
09372:2	1	S.MPLPPHPGH.P			491.754	2	982.5	982.493	0	7.4	17	Non	325.3	325.3	325.3	3.89	1032	>sp|P02817|AMELX_BOVIN Amelogenin, X isoform OS=Bos taurus OX=9913 GN=AMELX PE=1 SV=2	1	hf1_10472_ebo_22_1_261219.ScanId;v=1;d1=8486.8486.2	controllerType=0 controllerNumber=1 scan=8486	23.3671
10935:2	1	S.MPLPPHPGH.P			491.753	2	982.499	982.493	0	6	17	Non	439	396.32	396.32	4.74	1032	>sp|P02817|AMELX_BOVIN Amelogenin, X isoform OS=Bos taurus OX=9913 GN=AMELX PE=1 SV=2	1	hf1_10472_ebo_22_1_261219.ScanId;v=1;d1=9537.9537.2	controllerType=0 controllerNumber=1 scan=9537	25.1973
10536:2	1	S.MPLPPHPGH.P			491.752	2	982.498	982.493	0	5.1	17	Non	457.84	414.38	414.38	4.84	1032	>sp|P02817|AMELX_BOVIN Amelogenin, X isoform OS=Bos taurus OX=9913 GN=AMELX PE=1 SV=2	1	hf1_10472_ebo_22_1_261219.ScanId;v=1;d1=9265.9265.2	controllerType=0 controllerNumber=1 scan=9265	24.7232
10635:2	1	S.MPLPPHPGH.P			491.753	2	982.498	982.493	0	5.5	17	Non	470.47	443.95	443.95	4.84	1032	>sp|P02817|AMELX_BOVIN Amelogenin, X isoform OS=Bos taurus OX=9913 GN=AMELX PE=1 SV=2	1	hf1_10472_ebo_22_1_261219.ScanId;v=1;d1=9333.9333.2	controllerType=0 controllerNumber=1 scan=9333	24.8413
10291:2	1	S.MPLPPHPGH.P			491.752	2	982.498	982.493	0	5.1	17	Non	549.44	454.64	454.64	5.83	1032	>sp|P02817|AMELX_BOVIN Amelogenin, X isoform OS=Bos taurus OX=9913 GN=AMELX PE=1 SV=2	1	hf1_10472_ebo_22_1_261219.ScanId;v=1;d1=9097.9097.2	controllerType=0 controllerNumber=1 scan=9097	24.4314
09673:2	1	S.MPLPPHPGH.P			491.753	2	982.499	982.493	0	6	17	Non	557.29	473.28	473.28	5.83	1032	>sp|P02817|AMELX_BOVIN Amelogenin, X isoform OS=Bos taurus OX=9913 GN=AMELX PE=1 SV=2	1	hf1_10472_ebo_22_1_261219.ScanId;v=1;d1=8688.8688.2	controllerType=0 controllerNumber=1 scan=8688	23.7227
09978:2	1	S.MPLPPHPGH.P			491.752	2	982.497	982.493	0	4.9	17	Non	582.79	515.3	515.3	6.56	1032	>sp|P02817|AMELX_BOVIN Amelogenin, X isoform OS=Bos taurus OX=9913 GN=AMELX PE=1 SV=2	1	hf1_10472_ebo_22_1_261219.ScanId;v=1;d1=8890.8890.2	controllerType=0 controllerNumber=1 scan=8890	24.0737
06556:2	1	S.M[+15.995]PLPPHPGH.P		M[+16]	499.75	2	998.493	998.488	0	5.8	17	Non	384.65	364.65	70.28	4.74	1032	>sp|P02817|AMELX_BOVIN Amelogenin, X isoform OS=Bos taurus OX=9913 GN=AMELX PE=1 SV=2	1	hf1_10472_ebo_22_1_261219.ScanId;v=1;d1=6566.6566.2	controllerType=0 controllerNumber=1 scan=6566	20.0235
06252:2	1	S.M[+15.995]PLPPHPGH.P		M[+16]	499.75	2	998.493	998.488	0	5.3	17	Non	418.88	400.73	87.01	4.97	1032	>sp|P02817|AMELX_BOVIN Amelogenin, X isoform OS=Bos taurus OX=9913 GN=AMELX PE=1 SV=2	1	hf1_10472_ebo_22_1_261219.ScanId;v=1;d1=6363.6363.2	controllerType=0 controllerNumber=1 scan=6363	19.6713
05391:2	1	S.M[+15.995]PLPPHPGH.P		M[+16]	499.75	2	998.493	998.488	0	5	17	Non	430.23	390.23	72.56	4.6	1032	>sp|P02817|AMELX_BOVIN Amelogenin, X isoform OS=Bos taurus OX=9913 GN=AMELX PE=1 SV=2	1	hf1_10472_ebo_22_1_261219.ScanId;v=1;d1=5775.5775.2	controllerType=0 controllerNumber=1 scan=5775	18.6392
05671:2	1	S.M[+15.995]PLPPHPGH.P		M[+16]	499.75	2	998.494	998.488	0	5.9	17	Non	461.71	406.36	76.53	4.84	1032	>sp|P02817|AMELX_BOVIN Amelogenin, X isoform OS=Bos taurus OX=9913 GN=AMELX PE=1 SV=2	1	hf1_10472_ebo_22_1_261219.ScanId;v=1;d1=5968.5968.2	controllerType=0 controllerNumber=1 scan=5968	18.9819
05962:2	1	S.M[+15.995]PLPPHPGH.P		M[+16]	499.75	2	998.494	998.488	0	5.8	17	Non	503.84	448.8	99.62	5.71	1032	>sp|P02817|AMELX_BOVIN Amelogenin, X isoform OS=Bos taurus OX=9913 GN=AMELX PE=1 SV=2	1	hf1_10472_ebo_22_1_261219.ScanId;v=1;d1=6165.6165.2	controllerType=0 controllerNumber=1 scan=6165	19.3263
05118:2	1	S.M[+15.995]PLPPHPGH.P		M[+16]	499.75	2	998.494	998.488	0	6.1	17	Non	518.76	458.73	98.02	5.71	1032	>sp|P02817|AMELX_BOVIN Amelogenin, X isoform OS=Bos taurus OX=9913 GN=AMELX PE=1 SV=2	1	hf1_10472_ebo_22_1_261219.ScanId;v=1;d1=5583.5583.2	controllerType=0 controllerNumber=1 scan=5583	18.2985
04548:2	1	S.M[+15.995]PLPPHPGH.P		M[+16]	499.75	2	998.493	998.488	0	5.5	17	Non	535.62	471.11	116.59	5.83	1032	>sp|P02817|AMELX_BOVIN Amelogenin, X isoform OS=Bos taurus OX=9913 GN=AMELX PE=1 SV=2	1	hf1_10472_ebo_22_1_261219.ScanId;v=1;d1=5189.5189.2	controllerType=0 controllerNumber=1 scan=5189	17.611
04833:2	1	S.M[+15.995]PLPPHPGH.P		M[+16]	499.75	2	998.494	998.488	0	6	17	Non	539.09	488.14	116.18	5.83	1032	>sp|P02817|AMELX_BOVIN Amelogenin, X isoform OS=Bos taurus OX=9913 GN=AMELX PE=1 SV=2	1	hf1_10472_ebo_22_1_261219.ScanId;v=1;d1=5386.5386.2	controllerType=0 controllerNumber=1 scan=5386	17.955
12584:2	1	S.MPLPPHPGHP.G			540.279	2	1079.55	1079.55	0	5.6	17	Non	252.54	252.54	252.54	3.33	1032	>sp|P02817|AMELX_BOVIN Amelogenin, X isoform OS=Bos taurus OX=9913 GN=AMELX PE=1 SV=2	1	hf1_10472_ebo_22_1_261219.ScanId;v=1;d1=10656.10656.3	controllerType=0 controllerNumber=1 scan=10656	27.1471
12213:2	1	S.MPLPPHPGHP.G			540.279	2	1079.55	1079.55	0	5.7	17	Non	356.27	344.37	344.37	4.08	1032	>sp|P02817|AMELX_BOVIN Amelogenin, X isoform OS=Bos taurus OX=9913 GN=AMELX PE=1 SV=2	1	hf1_10472_ebo_22_1_261219.ScanId;v=1;d1=10409.10409.3	controllerType=0 controllerNumber=1 scan=10409	26.7179
12064:2	1	S.MPLPPHPGHP.G			540.279	2	1079.55	1079.55	0	5.2	17	Non	413.46	349.56	349.56	4.56	1032	>sp|P02817|AMELX_BOVIN Amelogenin, X isoform OS=Bos taurus OX=9913 GN=AMELX PE=1 SV=2	1	hf1_10472_ebo_22_1_261219.ScanId;v=1;d1=10304.10304.2	controllerType=0 controllerNumber=1 scan=10304	26.5335
11561:2	1	S.MPLPPHPGHP.G			540.279	2	1079.55	1079.55	0	5.5	17	Non	528.68	366.4	366.4	5.62	1032	>sp|P02817|AMELX_BOVIN Amelogenin, X isoform OS=Bos taurus OX=9913 GN=AMELX PE=1 SV=2	1	hf1_10472_ebo_22_1_261219.ScanId;v=1;d1=9974.9974.2	controllerType=0 controllerNumber=1 scan=9974	25.9596
10996:2	1	S.MPLPPHPGHP.G			540.279	2	1079.55	1079.55	0	4.6	17	Non	537.41	398.48	398.48	6.27	1032	>sp|P02817|AMELX_BOVIN Amelogenin, X isoform OS=Bos taurus OX=9913 GN=AMELX PE=1 SV=2	1	hf1_10472_ebo_22_1_261219.ScanId;v=1;d1=9574.9574.2	controllerType=0 controllerNumber=1 scan=9574	25.2597
11255:2	1	S.MPLPPHPGHP.G			540.279	2	1079.55	1079.55	0	4.9	17	Non	618.92	444.33	444.33	8.01	1032	>sp|P02817|AMELX_BOVIN Amelogenin, X isoform OS=Bos taurus OX=9913 GN=AMELX PE=1 SV=2	1	hf1_10472_ebo_22_1_261219.ScanId;v=1;d1=9767.9767.2	controllerType=0 controllerNumber=1 scan=9767	25.603
07411:2	1	S.M[+15.995]PLPPHPGHP.G		M[+16]	548.277	2	1095.55	1095.54	0	5.2	17	Non	495.28	333.22	70.92	4.65	1032	>sp|P02817|AMELX_BOVIN Amelogenin, X isoform OS=Bos taurus OX=9913 GN=AMELX PE=1 SV=2	1	hf1_10472_ebo_22_1_261219.ScanId;v=1;d1=7152.7152.2	controllerType=0 controllerNumber=1 scan=7152	21.0422
06723:2	1	S.M[+15.995]PLPPHPGHP.G		M[+16]	548.277	2	1095.55	1095.54	0	5.6	17	Non	592.97	408.21	65.2	7.01	1032	>sp|P02817|AMELX_BOVIN Amelogenin, X isoform OS=Bos taurus OX=9913 GN=AMELX PE=1 SV=2	1	hf1_10472_ebo_22_1_261219.ScanId;v=1;d1=6679.6679.2	controllerType=0 controllerNumber=1 scan=6679	20.2181
10760:2	1	S.MPLPPHPGHPG.Y			568.79	2	1136.57	1136.57	0	5.8	17	Non	114.66	50.28	50.28	1.53	1032	>sp|P02817|AMELX_BOVIN Amelogenin, X isoform OS=Bos taurus OX=9913 GN=AMELX PE=1 SV=2	1	hf1_10472_ebo_22_1_261219.ScanId;v=1;d1=9418.9418.3	controllerType=0 controllerNumber=1 scan=9418	24.99
00103:3	1	S.MPLPPHPGHPG.Y			379.528	3	1136.57	1136.57	0	3.1	17	Non	190.68	190.68	190.68	2.35	1032	>sp|P02817|AMELX_BOVIN Amelogenin, X isoform OS=Bos taurus OX=9913 GN=AMELX PE=1 SV=2	1	hf1_10472_ebo_22_1_261219.ScanId;v=1;d1=122.122.3	controllerType=0 controllerNumber=1 scan=122	0.3909
46079:3	1	S.MPLPPHPGHPG.Y			379.53	3	1136.58	1136.57	0	7.9	17	Non	312.18	312.18	312.18	4.53	1032	>sp|P02817|AMELX_BOVIN Amelogenin, X isoform OS=Bos taurus OX=9913 GN=AMELX PE=1 SV=2	1	hf1_10472_ebo_22_1_261219.ScanId;v=1;d1=34368.34368.3	controllerType=0 controllerNumber=1 scan=34368	73.5505
09685:3	1	S.MPLPPHPGHPG.Y			379.529	3	1136.57	1136.57	0	5.7	17	Non	337.1	331.95	331.95	4.07	1032	>sp|P02817|AMELX_BOVIN Amelogenin, X isoform OS=Bos taurus OX=9913 GN=AMELX PE=1 SV=2	1	hf1_10472_ebo_22_1_261219.ScanId;v=1;d1=8696.8696.3	controllerType=0 controllerNumber=1 scan=8696	23.7341
11429:3	1	S.MPLPPHPGHPG.Y			379.529	3	1136.57	1136.57	0	4.9	17	Non	433.11	410.42	410.42	5.41	1032	>sp|P02817|AMELX_BOVIN Amelogenin, X isoform OS=Bos taurus OX=9913 GN=AMELX PE=1 SV=2	1	hf1_10472_ebo_22_1_261219.ScanId;v=1;d1=9886.9886.3	controllerType=0 controllerNumber=1 scan=9886	25.8097
09747:2	1	S.MPLPPHPGHPG.Y			568.79	2	1136.57	1136.57	0	5.9	17	Non	441.28	313.28	313.28	4.5	1032	>sp|P02817|AMELX_BOVIN Amelogenin, X isoform OS=Bos taurus OX=9913 GN=AMELX PE=1 SV=2	1	hf1_10472_ebo_22_1_261219.ScanId;v=1;d1=8737.8737.2	controllerType=0 controllerNumber=1 scan=8737	23.806
10574:3	1	S.MPLPPHPGHPG.Y			379.529	3	1136.57	1136.57	0	4.9	17	Non	470.74	470.74	470.74	6.15	1032	>sp|P02817|AMELX_BOVIN Amelogenin, X isoform OS=Bos taurus OX=9913 GN=AMELX PE=1 SV=2	1	hf1_10472_ebo_22_1_261219.ScanId;v=1;d1=9293.9293.3	controllerType=0 controllerNumber=1 scan=9293	24.7732
10287:3	1	S.MPLPPHPGHPG.Y			379.529	3	1136.57	1136.57	0	5.5	17	Non	494.45	400.44	400.44	6.15	1032	>sp|P02817|AMELX_BOVIN Amelogenin, X isoform OS=Bos taurus OX=9913 GN=AMELX PE=1 SV=2	1	hf1_10472_ebo_22_1_261219.ScanId;v=1;d1=9095.9095.3	controllerType=0 controllerNumber=1 scan=9095	24.4289
10866:3	1	S.MPLPPHPGHPG.Y			379.529	3	1136.57	1136.57	0	5.3	17	Non	497.96	413.43	413.43	6.15	1032	>sp|P02817|AMELX_BOVIN Amelogenin, X isoform OS=Bos taurus OX=9913 GN=AMELX PE=1 SV=2	1	hf1_10472_ebo_22_1_261219.ScanId;v=1;d1=9491.9491.3	controllerType=0 controllerNumber=1 scan=9491	25.1172
10656:2	1	S.MPLPPHPGHPG.Y			568.79	2	1136.57	1136.57	0	5.4	17	Non	502.49	370.69	370.69	5.5	1032	>sp|P02817|AMELX_BOVIN Amelogenin, X isoform OS=Bos taurus OX=9913 GN=AMELX PE=1 SV=2	1	hf1_10472_ebo_22_1_261219.ScanId;v=1;d1=9346.9346.4	controllerType=0 controllerNumber=1 scan=9346	24.8636
09989:3	1	S.MPLPPHPGHPG.Y			379.529	3	1136.57	1136.57	0	4.8	17	Non	503.28	495	495	6.15	1032	>sp|P02817|AMELX_BOVIN Amelogenin, X isoform OS=Bos taurus OX=9913 GN=AMELX PE=1 SV=2	1	hf1_10472_ebo_22_1_261219.ScanId;v=1;d1=8897.8897.3	controllerType=0 controllerNumber=1 scan=8897	24.087
11155:3	1	S.MPLPPHPGHPG.Y			379.529	3	1136.57	1136.57	0	3.8	17	Non	525.39	503.02	503.02	5.84	1032	>sp|P02817|AMELX_BOVIN Amelogenin, X isoform OS=Bos taurus OX=9913 GN=AMELX PE=1 SV=2	1	hf1_10472_ebo_22_1_261219.ScanId;v=1;d1=9691.9691.3	controllerType=0 controllerNumber=1 scan=9691	25.4685
10055:2	1	S.MPLPPHPGHPG.Y			568.79	2	1136.57	1136.57	0	4.9	17	Non	640.86	556.43	556.43	8.01	1032	>sp|P02817|AMELX_BOVIN Amelogenin, X isoform OS=Bos taurus OX=9913 GN=AMELX PE=1 SV=2	1	hf1_10472_ebo_22_1_261219.ScanId;v=1;d1=8942.8942.2	controllerType=0 controllerNumber=1 scan=8942	24.1636
10350:2	1	S.MPLPPHPGHPG.Y			568.79	2	1136.57	1136.57	0	5	17	Non	658.91	588.85	588.85	9.01	1032	>sp|P02817|AMELX_BOVIN Amelogenin, X isoform OS=Bos taurus OX=9913 GN=AMELX PE=1 SV=2	1	hf1_10472_ebo_22_1_261219.ScanId;v=1;d1=9140.9140.2	controllerType=0 controllerNumber=1 scan=9140	24.5067
08526:3	1	S.MPLPP[+15.995]HPGHPG.Y		P[+16]	384.861	3	1152.57	1152.56	0	5.1	17	Non	138.22	138.22	9.23	2.11	1032	>sp|P02817|AMELX_BOVIN Amelogenin, X isoform OS=Bos taurus OX=9913 GN=AMELX PE=1 SV=2	1	hf1_10472_ebo_22_1_261219.ScanId;v=1;d1=7918.7918.3	controllerType=0 controllerNumber=1 scan=7918	22.3773
09817:3	1	S.MPLPPHP[+15.995]GHPG.Y		P[+16]	384.861	3	1152.57	1152.56	0	5.4	17	Non	151.84	145.95	0	2.11	1032	>sp|P02817|AMELX_BOVIN Amelogenin, X isoform OS=Bos taurus OX=9913 GN=AMELX PE=1 SV=2	1	hf1_10472_ebo_22_1_261219.ScanId;v=1;d1=8784.8784.3	controllerType=0 controllerNumber=1 scan=8784	23.888
07975:2	1	S.MP[+15.995]LPPHPGHPG.Y		P[+16]	576.788	2	1152.57	1152.56	0	5.7	17	Non	196.25	116	4	1.53	1032	>sp|P02817|AMELX_BOVIN Amelogenin, X isoform OS=Bos taurus OX=9913 GN=AMELX PE=1 SV=2	1	hf1_10472_ebo_22_1_261219.ScanId;v=1;d1=7531.7531.2	controllerType=0 controllerNumber=1 scan=7531	21.702
08811:3	1	S.MPLPPHPGHP[+15.995]G.Y		P[+16]	384.861	3	1152.57	1152.56	0	4.9	17	Non	256.06	256.06	5.16	3.57	1032	>sp|P02817|AMELX_BOVIN Amelogenin, X isoform OS=Bos taurus OX=9913 GN=AMELX PE=1 SV=2	1	hf1_10472_ebo_22_1_261219.ScanId;v=1;d1=8116.8116.3	controllerType=0 controllerNumber=1 scan=8116	22.7221
09189:3	1	S.MPLPPHPGHP[+15.995]G.Y		P[+16]	384.861	3	1152.57	1152.56	0	5.9	17	Non	273.48	246.64	6.28	3.56	1032	>sp|P02817|AMELX_BOVIN Amelogenin, X isoform OS=Bos taurus OX=9913 GN=AMELX PE=1 SV=2	1	hf1_10472_ebo_22_1_261219.ScanId;v=1;d1=8362.8362.3	controllerType=0 controllerNumber=1 scan=8362	23.1506
08247:3	1	S.M[+15.995]PLPPHPGHPG.Y		M[+16]	384.86	3	1152.57	1152.56	0	4.1	17	Non	336.92	336.92	14.92	3.79	1032	>sp|P02817|AMELX_BOVIN Amelogenin, X isoform OS=Bos taurus OX=9913 GN=AMELX PE=1 SV=2	1	hf1_10472_ebo_22_1_261219.ScanId;v=1;d1=7722.7722.3	controllerType=0 controllerNumber=1 scan=7722	22.036
09476:3	1	S.MPLPPHPGHP[+15.995]G.Y		P[+16]	384.861	3	1152.57	1152.56	0	6.6	17	Non	368.16	309.49	2.28	4.67	1032	>sp|P02817|AMELX_BOVIN Amelogenin, X isoform OS=Bos taurus OX=9913 GN=AMELX PE=1 SV=2	1	hf1_10472_ebo_22_1_261219.ScanId;v=1;d1=8556.8556.3	controllerType=0 controllerNumber=1 scan=8556	23.492
07953:3	1	S.M[+15.995]PLPPHPGHPG.Y		M[+16]	384.861	3	1152.57	1152.56	0	5.4	17	Non	395.44	351.31	36.22	4.56	1032	>sp|P02817|AMELX_BOVIN Amelogenin, X isoform OS=Bos taurus OX=9913 GN=AMELX PE=1 SV=2	1	hf1_10472_ebo_22_1_261219.ScanId;v=1;d1=7516.7516.3	controllerType=0 controllerNumber=1 scan=7516	21.6771
05282:3	1	S.M[+15.995]PLPPHPGHPG.Y		M[+16]	384.861	3	1152.57	1152.56	0	4.6	17	Non	403.99	378.39	31.95	6.06	1032	>sp|P02817|AMELX_BOVIN Amelogenin, X isoform OS=Bos taurus OX=9913 GN=AMELX PE=1 SV=2	1	hf1_10472_ebo_22_1_261219.ScanId;v=1;d1=5698.5698.3	controllerType=0 controllerNumber=1 scan=5698	18.5033
06439:3	1	S.M[+15.995]PLPPHPGHPG.Y		M[+16]	384.861	3	1152.57	1152.56	0	5.8	17	Non	420.99	362.5	48.71	6.06	1032	>sp|P02817|AMELX_BOVIN Amelogenin, X isoform OS=Bos taurus OX=9913 GN=AMELX PE=1 SV=2	1	hf1_10472_ebo_22_1_261219.ScanId;v=1;d1=6488.6488.3	controllerType=0 controllerNumber=1 scan=6488	19.8882
07599:3	1	S.M[+15.995]PLPPHPGHPG.Y		M[+16]	384.861	3	1152.57	1152.56	0	4.5	17	Non	424.36	370.77	37.52	6.06	1032	>sp|P02817|AMELX_BOVIN Amelogenin, X isoform OS=Bos taurus OX=9913 GN=AMELX PE=1 SV=2	1	hf1_10472_ebo_22_1_261219.ScanId;v=1;d1=7280.7280.3	controllerType=0 controllerNumber=1 scan=7280	21.2664
07026:3	1	S.M[+15.995]PLPPHPGHPG.Y		M[+16]	384.861	3	1152.57	1152.56	0	5.7	17	Non	425.29	420.42	35.8	6.06	1032	>sp|P02817|AMELX_BOVIN Amelogenin, X isoform OS=Bos taurus OX=9913 GN=AMELX PE=1 SV=2	1	hf1_10472_ebo_22_1_261219.ScanId;v=1;d1=6884.6884.3	controllerType=0 controllerNumber=1 scan=6884	20.5765
07312:3	1	S.M[+15.995]PLPPHPGHPG.Y		M[+16]	384.861	3	1152.57	1152.56	0	5.7	17	Non	442.31	407.21	58.74	6.15	1032	>sp|P02817|AMELX_BOVIN Amelogenin, X isoform OS=Bos taurus OX=9913 GN=AMELX PE=1 SV=2	1	hf1_10472_ebo_22_1_261219.ScanId;v=1;d1=7082.7082.3	controllerType=0 controllerNumber=1 scan=7082	20.9217
06731:3	1	S.M[+15.995]PLPPHPGHPG.Y		M[+16]	384.861	3	1152.57	1152.56	0	5.8	17	Non	447.22	423.71	37.77	6.15	1032	>sp|P02817|AMELX_BOVIN Amelogenin, X isoform OS=Bos taurus OX=9913 GN=AMELX PE=1 SV=2	1	hf1_10472_ebo_22_1_261219.ScanId;v=1;d1=6686.6686.3	controllerType=0 controllerNumber=1 scan=6686	20.2313
46103:3	1	S.M[+15.995]PLPPHPGHPG.Y		M[+16]	384.862	3	1152.57	1152.56	0	8.5	17	Non	447.98	395.65	36.39	5.62	1032	>sp|P02817|AMELX_BOVIN Amelogenin, X isoform OS=Bos taurus OX=9913 GN=AMELX PE=1 SV=2	1	hf1_10472_ebo_22_1_261219.ScanId;v=1;d1=34389.34389.3	controllerType=0 controllerNumber=1 scan=34389	73.5877
05138:2	1	S.M[+15.995]PLPPHPGHPG.Y		M[+16]	576.788	2	1152.57	1152.56	0	5.1	17	Non	449.03	331.28	53.48	4.65	1032	>sp|P02817|AMELX_BOVIN Amelogenin, X isoform OS=Bos taurus OX=9913 GN=AMELX PE=1 SV=2	1	hf1_10472_ebo_22_1_261219.ScanId;v=1;d1=5598.5598.2	controllerType=0 controllerNumber=1 scan=5598	18.3266
06140:3	1	S.M[+15.995]PLPPHPGHPG.Y		M[+16]	384.861	3	1152.57	1152.56	0	7.1	17	Non	453.45	398.6	37.16	6.42	1032	>sp|P02817|AMELX_BOVIN Amelogenin, X isoform OS=Bos taurus OX=9913 GN=AMELX PE=1 SV=2	1	hf1_10472_ebo_22_1_261219.ScanId;v=1;d1=6286.6286.3	controllerType=0 controllerNumber=1 scan=6286	19.5372
05843:3	1	S.M[+15.995]PLPPHPGHPG.Y		M[+16]	384.861	3	1152.57	1152.56	0	6.5	17	Non	475.25	412.85	36.78	6.42	1032	>sp|P02817|AMELX_BOVIN Amelogenin, X isoform OS=Bos taurus OX=9913 GN=AMELX PE=1 SV=2	1	hf1_10472_ebo_22_1_261219.ScanId;v=1;d1=6088.6088.3	controllerType=0 controllerNumber=1 scan=6088	19.1914
05564:3	1	S.M[+15.995]PLPPHPGHPG.Y		M[+16]	384.862	3	1152.57	1152.56	0	7.3	17	Non	492.34	427.52	34.41	6.42	1032	>sp|P02817|AMELX_BOVIN Amelogenin, X isoform OS=Bos taurus OX=9913 GN=AMELX PE=1 SV=2	1	hf1_10472_ebo_22_1_261219.ScanId;v=1;d1=5894.5894.3	controllerType=0 controllerNumber=1 scan=5894	18.8496
07169:2	1	S.M[+15.995]PLPPHPGHPG.Y		M[+16]	576.788	2	1152.57	1152.56	0	5	17	Non	533.11	378.92	66.12	5.62	1032	>sp|P02817|AMELX_BOVIN Amelogenin, X isoform OS=Bos taurus OX=9913 GN=AMELX PE=1 SV=2	1	hf1_10472_ebo_22_1_261219.ScanId;v=1;d1=6984.6984.2	controllerType=0 controllerNumber=1 scan=6984	20.7502
06878:2	1	S.M[+15.995]PLPPHPGHPG.Y		M[+16]	576.788	2	1152.57	1152.56	0	5.6	17	Non	538.39	424.89	73.8	6.27	1032	>sp|P02817|AMELX_BOVIN Amelogenin, X isoform OS=Bos taurus OX=9913 GN=AMELX PE=1 SV=2	1	hf1_10472_ebo_22_1_261219.ScanId;v=1;d1=6786.6786.2	controllerType=0 controllerNumber=1 scan=6786	20.4049
06589:2	1	S.M[+15.995]PLPPHPGHPG.Y		M[+16]	576.788	2	1152.57	1152.56	0	5.7	17	Non	561.12	431.95	78.5	6.13	1032	>sp|P02817|AMELX_BOVIN Amelogenin, X isoform OS=Bos taurus OX=9913 GN=AMELX PE=1 SV=2	1	hf1_10472_ebo_22_1_261219.ScanId;v=1;d1=6587.6587.2	controllerType=0 controllerNumber=1 scan=6587	20.0591
06284:2	1	S.M[+15.995]PLPPHPGHPG.Y		M[+16]	576.788	2	1152.57	1152.56	0	5.1	17	Non	578.68	436.61	88.14	7.01	1032	>sp|P02817|AMELX_BOVIN Amelogenin, X isoform OS=Bos taurus OX=9913 GN=AMELX PE=1 SV=2	1	hf1_10472_ebo_22_1_261219.ScanId;v=1;d1=6385.6385.2	controllerType=0 controllerNumber=1 scan=6385	19.709
05415:2	1	S.M[+15.995]PLPPHPGHPG.Y		M[+16]	576.787	2	1152.57	1152.56	0	4.8	17	Non	592.7	549.02	92.03	7.01	1032	>sp|P02817|AMELX_BOVIN Amelogenin, X isoform OS=Bos taurus OX=9913 GN=AMELX PE=1 SV=2	1	hf1_10472_ebo_22_1_261219.ScanId;v=1;d1=5791.5791.2	controllerType=0 controllerNumber=1 scan=5791	18.6685
05994:2	1	S.M[+15.995]PLPPHPGHPG.Y		M[+16]	576.788	2	1152.57	1152.56	0	5.8	17	Non	608.55	459.78	99.19	8.01	1032	>sp|P02817|AMELX_BOVIN Amelogenin, X isoform OS=Bos taurus OX=9913 GN=AMELX PE=1 SV=2	1	hf1_10472_ebo_22_1_261219.ScanId;v=1;d1=6187.6187.2	controllerType=0 controllerNumber=1 scan=6187	19.3647
05701:2	1	S.M[+15.995]PLPPHPGHPG.Y		M[+16]	576.788	2	1152.57	1152.56	0	5.6	17	Non	613.44	499.64	97.48	8.01	1032	>sp|P02817|AMELX_BOVIN Amelogenin, X isoform OS=Bos taurus OX=9913 GN=AMELX PE=1 SV=2	1	hf1_10472_ebo_22_1_261219.ScanId;v=1;d1=5989.5989.2	controllerType=0 controllerNumber=1 scan=5989	19.0191
05238:3	1	S.M[+15.995]PLPPHPGHP[+15.995]G.Y		M[+16], P[+16]	390.192	3	1168.56	1168.56	0	2.8	17	Non	202.96	202.96	5.11	2.16	1032	>sp|P02817|AMELX_BOVIN Amelogenin, X isoform OS=Bos taurus OX=9913 GN=AMELX PE=1 SV=2	1	hf1_10472_ebo_22_1_261219.ScanId;v=1;d1=5668.5668.4	controllerType=0 controllerNumber=1 scan=5668	18.448
05712:3	1	S.M[+15.995]PLPPHPGHP[+15.995]G.Y		M[+16], P[+16]	390.192	3	1168.56	1168.56	0	4.3	17	Non	209.34	209.34	2	2.25	1032	>sp|P02817|AMELX_BOVIN Amelogenin, X isoform OS=Bos taurus OX=9913 GN=AMELX PE=1 SV=2	1	hf1_10472_ebo_22_1_261219.ScanId;v=1;d1=5998.5998.3	controllerType=0 controllerNumber=1 scan=5998	19.0326
04957:3	1	S.M[+15.995]PLPPHPGHP[+15.995]G.Y		M[+16], P[+16]	390.193	3	1168.56	1168.56	0	6.8	17	Non	263.18	263.18	6.81	3.82	1032	>sp|P02817|AMELX_BOVIN Amelogenin, X isoform OS=Bos taurus OX=9913 GN=AMELX PE=1 SV=2	1	hf1_10472_ebo_22_1_261219.ScanId;v=1;d1=5470.5470.2	controllerType=0 controllerNumber=1 scan=5470	18.0997
04660:3	1	S.M[+15.995]PLPPHPGHP[+15.995]G.Y		M[+16], P[+16]	390.193	3	1168.56	1168.56	0	5.5	17	Non	377.31	288.05	17.91	4.02	1032	>sp|P02817|AMELX_BOVIN Amelogenin, X isoform OS=Bos taurus OX=9913 GN=AMELX PE=1 SV=2	1	hf1_10472_ebo_22_1_261219.ScanId;v=1;d1=5267.5267.3	controllerType=0 controllerNumber=1 scan=5267	17.7458
12806:3	1	S.MPLPPHPGHPGY.I			433.884	3	1299.64	1299.63	0	4.5	17	Non	388.36	263.22	263.22	4.01	1032	>sp|P02817|AMELX_BOVIN Amelogenin, X isoform OS=Bos taurus OX=9913 GN=AMELX PE=1 SV=2	1	hf1_10472_ebo_22_1_261219.ScanId;v=1;d1=10820.10820.3	controllerType=0 controllerNumber=1 scan=10820	27.4352
13697:3	1	S.MPLPPHPGHPGY.I			433.884	3	1299.64	1299.63	0	6.4	17	Non	481.8	348.32	348.32	4.91	1032	>sp|P02817|AMELX_BOVIN Amelogenin, X isoform OS=Bos taurus OX=9913 GN=AMELX PE=1 SV=2	1	hf1_10472_ebo_22_1_261219.ScanId;v=1;d1=11422.11422.3	controllerType=0 controllerNumber=1 scan=11422	28.4812
13103:3	1	S.MPLPPHPGHPGY.I			433.884	3	1299.64	1299.63	0	5.1	17	Non	489.5	362.33	362.33	6.15	1032	>sp|P02817|AMELX_BOVIN Amelogenin, X isoform OS=Bos taurus OX=9913 GN=AMELX PE=1 SV=2	1	hf1_10472_ebo_22_1_261219.ScanId;v=1;d1=11027.11027.3	controllerType=0 controllerNumber=1 scan=11027	27.7916
14006:3	1	S.MPLPPHPGHPGY.I			433.884	3	1299.64	1299.63	0	6	17	Non	489.5	359.89	359.89	5.3	1032	>sp|P02817|AMELX_BOVIN Amelogenin, X isoform OS=Bos taurus OX=9913 GN=AMELX PE=1 SV=2	1	hf1_10472_ebo_22_1_261219.ScanId;v=1;d1=11625.11625.3	controllerType=0 controllerNumber=1 scan=11625	28.8353
13387:3	1	S.MPLPPHPGHPGY.I			433.884	3	1299.64	1299.63	0	5.9	17	Non	528.52	401.1	401.1	6.27	1032	>sp|P02817|AMELX_BOVIN Amelogenin, X isoform OS=Bos taurus OX=9913 GN=AMELX PE=1 SV=2	1	hf1_10472_ebo_22_1_261219.ScanId;v=1;d1=11222.11222.3	controllerType=0 controllerNumber=1 scan=11222	28.1337
10321:2	1	S.M[+15.995]PLPPHPGHPGY.I		M[+16]	658.319	2	1315.63	1315.63	0	3.8	17	Non	292.57	292.57	16.01	3.48	1032	>sp|P02817|AMELX_BOVIN Amelogenin, X isoform OS=Bos taurus OX=9913 GN=AMELX PE=1 SV=2	1	hf1_10472_ebo_22_1_261219.ScanId;v=1;d1=9118.9118.2	controllerType=0 controllerNumber=1 scan=9118	24.4681
10604:2	1	S.MP[+15.995]LPPHPGHPGY.I		P[+16]	658.319	2	1315.63	1315.63	0	4.8	17	Non	303.47	303.47	4	3.89	1032	>sp|P02817|AMELX_BOVIN Amelogenin, X isoform OS=Bos taurus OX=9913 GN=AMELX PE=1 SV=2	1	hf1_10472_ebo_22_1_261219.ScanId;v=1;d1=9315.9315.2	controllerType=0 controllerNumber=1 scan=9315	24.8115
10916:3	1	S.M[+15.995]PLPPHPGHPGY.I		M[+16]	439.216	3	1315.63	1315.63	0	5.8	17	Non	369.83	327.62	25.97	4.33	1032	>sp|P02817|AMELX_BOVIN Amelogenin, X isoform OS=Bos taurus OX=9913 GN=AMELX PE=1 SV=2	1	hf1_10472_ebo_22_1_261219.ScanId;v=1;d1=9524.9524.3	controllerType=0 controllerNumber=1 scan=9524	25.175
08551:3	1	S.M[+15.995]PLPPHPGHPGY.I		M[+16]	439.215	3	1315.63	1315.63	0	4.2	17	Non	398.21	319.67	25.94	3.98	1032	>sp|P02817|AMELX_BOVIN Amelogenin, X isoform OS=Bos taurus OX=9913 GN=AMELX PE=1 SV=2	1	hf1_10472_ebo_22_1_261219.ScanId;v=1;d1=7935.7935.3	controllerType=0 controllerNumber=1 scan=7935	22.4052
08704:2	1	S.M[+15.995]PLPPHPGHPGY.I		M[+16]	658.321	2	1315.63	1315.63	0	7	17	Non	418.23	310.4	63.02	4.68	1032	>sp|P02817|AMELX_BOVIN Amelogenin, X isoform OS=Bos taurus OX=9913 GN=AMELX PE=1 SV=2	1	hf1_10472_ebo_22_1_261219.ScanId;v=1;d1=8035.8035.2	controllerType=0 controllerNumber=1 scan=8035	22.5789
09054:2	1	S.M[+15.995]PLPPHPGHPGY.I		M[+16]	658.32	2	1315.63	1315.63	0	5.5	17	Non	432.18	346.84	61.35	4.56	1032	>sp|P02817|AMELX_BOVIN Amelogenin, X isoform OS=Bos taurus OX=9913 GN=AMELX PE=1 SV=2	1	hf1_10472_ebo_22_1_261219.ScanId;v=1;d1=8275.8275.2	controllerType=0 controllerNumber=1 scan=8275	22.9974
10623:3	1	S.M[+15.995]PLPPHPGHPGY.I		M[+16]	439.216	3	1315.63	1315.63	0	5.4	17	Non	476.8	385.74	32.42	6.15	1032	>sp|P02817|AMELX_BOVIN Amelogenin, X isoform OS=Bos taurus OX=9913 GN=AMELX PE=1 SV=2	1	hf1_10472_ebo_22_1_261219.ScanId;v=1;d1=9326.9326.3	controllerType=0 controllerNumber=1 scan=9326	24.8308
08995:2	1	S.M[+15.995]PLPPHPGHPGY.I		M[+16]	658.32	2	1315.63	1315.63	0	5.3	17	Non	503.88	404.38	67.49	6.16	1032	>sp|P02817|AMELX_BOVIN Amelogenin, X isoform OS=Bos taurus OX=9913 GN=AMELX PE=1 SV=2	1	hf1_10472_ebo_22_1_261219.ScanId;v=1;d1=8237.8237.2	controllerType=0 controllerNumber=1 scan=8237	22.9327
10035:3	1	S.M[+15.995]PLPPHPGHPGY.I		M[+16]	439.216	3	1315.63	1315.63	0	5.1	17	Non	520.69	453.55	33.19	6.27	1032	>sp|P02817|AMELX_BOVIN Amelogenin, X isoform OS=Bos taurus OX=9913 GN=AMELX PE=1 SV=2	1	hf1_10472_ebo_22_1_261219.ScanId;v=1;d1=8930.8930.3	controllerType=0 controllerNumber=1 scan=8930	24.1432
09592:2	1	S.M[+15.995]PLPPHPGHPGY.I		M[+16]	658.32	2	1315.63	1315.63	0	5.9	17	Non	521.62	428.36	68.95	6.27	1032	>sp|P02817|AMELX_BOVIN Amelogenin, X isoform OS=Bos taurus OX=9913 GN=AMELX PE=1 SV=2	1	hf1_10472_ebo_22_1_261219.ScanId;v=1;d1=8634.8634.2	controllerType=0 controllerNumber=1 scan=8634	23.6286
09294:2	1	S.M[+15.995]PLPPHPGHPGY.I		M[+16]	658.32	2	1315.63	1315.63	0	6	17	Non	525.9	408.5	63.09	6.27	1032	>sp|P02817|AMELX_BOVIN Amelogenin, X isoform OS=Bos taurus OX=9913 GN=AMELX PE=1 SV=2	1	hf1_10472_ebo_22_1_261219.ScanId;v=1;d1=8436.8436.2	controllerType=0 controllerNumber=1 scan=8436	23.2812
10332:3	1	S.M[+15.995]PLPPHPGHPGY.I		M[+16]	439.216	3	1315.63	1315.63	0	5.2	17	Non	530.64	461.98	38.97	6.27	1032	>sp|P02817|AMELX_BOVIN Amelogenin, X isoform OS=Bos taurus OX=9913 GN=AMELX PE=1 SV=2	1	hf1_10472_ebo_22_1_261219.ScanId;v=1;d1=9128.9128.3	controllerType=0 controllerNumber=1 scan=9128	24.486
09147:3	1	S.M[+15.995]PLPPHPGHPGY.I		M[+16]	439.216	3	1315.63	1315.63	0	6.2	17	Non	538.75	471.56	34.12	6.54	1032	>sp|P02817|AMELX_BOVIN Amelogenin, X isoform OS=Bos taurus OX=9913 GN=AMELX PE=1 SV=2	1	hf1_10472_ebo_22_1_261219.ScanId;v=1;d1=8336.8336.3	controllerType=0 controllerNumber=1 scan=8336	23.1059
08842:3	1	S.M[+15.995]PLPPHPGHPGY.I		M[+16]	439.216	3	1315.63	1315.63	0	5.2	17	Non	545.33	485.66	33.02	6.27	1032	>sp|P02817|AMELX_BOVIN Amelogenin, X isoform OS=Bos taurus OX=9913 GN=AMELX PE=1 SV=2	1	hf1_10472_ebo_22_1_261219.ScanId;v=1;d1=8138.8138.3	controllerType=0 controllerNumber=1 scan=8138	22.7602
09739:3	1	S.M[+15.995]PLPPHPGHPGY.I		M[+16]	439.216	3	1315.63	1315.63	0	6.1	17	Non	547.46	470.61	36.56	6.27	1032	>sp|P02817|AMELX_BOVIN Amelogenin, X isoform OS=Bos taurus OX=9913 GN=AMELX PE=1 SV=2	1	hf1_10472_ebo_22_1_261219.ScanId;v=1;d1=8732.8732.3	controllerType=0 controllerNumber=1 scan=8732	23.7986
09445:3	1	S.M[+15.995]PLPPHPGHPGY.I		M[+16]	439.216	3	1315.63	1315.63	0	6.4	17	Non	561.03	492.92	34.8	7.27	1032	>sp|P02817|AMELX_BOVIN Amelogenin, X isoform OS=Bos taurus OX=9913 GN=AMELX PE=1 SV=2	1	hf1_10472_ebo_22_1_261219.ScanId;v=1;d1=8534.8534.3	controllerType=0 controllerNumber=1 scan=8534	23.4533
13977:3	1	S.MP[+15.995]LPPHPGHPGYI.N		P[+16]	476.911	3	1428.72	1428.71	0	6.6	17	Non	328.36	277.05	5.8	4.01	1032	>sp|P02817|AMELX_BOVIN Amelogenin, X isoform OS=Bos taurus OX=9913 GN=AMELX PE=1 SV=2	1	hf1_10472_ebo_22_1_261219.ScanId;v=1;d1=11605.11605.3	controllerType=0 controllerNumber=1 scan=11605	28.8001
13671:3	1	S.M[+15.995]PLPPHPGHPGYI.N		M[+16]	476.911	3	1428.72	1428.71	0	6.3	17	Non	345.31	281.51	20.79	4.17	1032	>sp|P02817|AMELX_BOVIN Amelogenin, X isoform OS=Bos taurus OX=9913 GN=AMELX PE=1 SV=2	1	hf1_10472_ebo_22_1_261219.ScanId;v=1;d1=11404.11404.3	controllerType=0 controllerNumber=1 scan=11404	28.4487
16387:3	1	S.MPLPPHPGHPGYIN.F			509.594	3	1526.77	1526.76	0	6.5	17	Non	416.21	319.79	319.79	4.67	1032	>sp|P02817|AMELX_BOVIN Amelogenin, X isoform OS=Bos taurus OX=9913 GN=AMELX PE=1 SV=2	1	hf1_10472_ebo_22_1_261219.ScanId;v=1;d1=13238.13238.3	controllerType=0 controllerNumber=1 scan=13238	31.6197
16087:3	1	S.MPLPPHPGHPGYIN.F			509.594	3	1526.77	1526.76	0	6.7	17	Non	497.75	362.75	362.75	5.77	1032	>sp|P02817|AMELX_BOVIN Amelogenin, X isoform OS=Bos taurus OX=9913 GN=AMELX PE=1 SV=2	1	hf1_10472_ebo_22_1_261219.ScanId;v=1;d1=13039.13039.3	controllerType=0 controllerNumber=1 scan=13039	31.2712
15513:3	1	S.MPLPPHPGHPGYIN.F			509.593	3	1526.76	1526.76	0	4.3	17	Non	521.48	410.63	410.63	6.27	1032	>sp|P02817|AMELX_BOVIN Amelogenin, X isoform OS=Bos taurus OX=9913 GN=AMELX PE=1 SV=2	1	hf1_10472_ebo_22_1_261219.ScanId;v=1;d1=12631.12631.3	controllerType=0 controllerNumber=1 scan=12631	30.572
14910:3	1	S.MPLPPHPGHPGYIN.F			509.594	3	1526.77	1526.76	0	5.9	17	Non	526.6	407.7	407.7	6.27	1032	>sp|P02817|AMELX_BOVIN Amelogenin, X isoform OS=Bos taurus OX=9913 GN=AMELX PE=1 SV=2	1	hf1_10472_ebo_22_1_261219.ScanId;v=1;d1=12223.12223.3	controllerType=0 controllerNumber=1 scan=12223	29.8715
15659:2	1	S.MPLPPHPGHPGYIN.F			763.886	2	1526.76	1526.76	0	4.5	17	Non	537.56	376.77	376.77	6.27	1032	>sp|P02817|AMELX_BOVIN Amelogenin, X isoform OS=Bos taurus OX=9913 GN=AMELX PE=1 SV=2	1	hf1_10472_ebo_22_1_261219.ScanId;v=1;d1=12743.12743.2	controllerType=0 controllerNumber=1 scan=12743	30.7612
15221:3	1	S.MPLPPHPGHPGYIN.F			509.594	3	1526.77	1526.76	0	5.9	17	Non	556.18	452.87	452.87	6.27	1032	>sp|P02817|AMELX_BOVIN Amelogenin, X isoform OS=Bos taurus OX=9913 GN=AMELX PE=1 SV=2	1	hf1_10472_ebo_22_1_261219.ScanId;v=1;d1=12428.12428.3	controllerType=0 controllerNumber=1 scan=12428	30.2252
15795:3	1	S.MPLPPHPGHPGYIN.F			509.594	3	1526.77	1526.76	0	5.9	17	Non	562.73	449.72	449.72	7	1032	>sp|P02817|AMELX_BOVIN Amelogenin, X isoform OS=Bos taurus OX=9913 GN=AMELX PE=1 SV=2	1	hf1_10472_ebo_22_1_261219.ScanId;v=1;d1=12841.12841.3	controllerType=0 controllerNumber=1 scan=12841	30.9289
15368:2	1	S.MPLPPHPGHPGYIN.F			763.886	2	1526.77	1526.76	0	5.2	17	Non	638.75	448.1	448.1	8.01	1032	>sp|P02817|AMELX_BOVIN Amelogenin, X isoform OS=Bos taurus OX=9913 GN=AMELX PE=1 SV=2	1	hf1_10472_ebo_22_1_261219.ScanId;v=1;d1=12532.12532.2	controllerType=0 controllerNumber=1 scan=12532	30.4017
15046:2	1	S.MPLPPHPGHPGYIN.F			763.887	2	1526.77	1526.76	0	6.1	17	Non	648.45	462.12	462.12	8.01	1032	>sp|P02817|AMELX_BOVIN Amelogenin, X isoform OS=Bos taurus OX=9913 GN=AMELX PE=1 SV=2	1	hf1_10472_ebo_22_1_261219.ScanId;v=1;d1=12312.12312.2	controllerType=0 controllerNumber=1 scan=12312	30.0261
13848:3	1	S.MPLPP[+15.995]HPGHPGYIN.F		P[+16]	514.926	3	1542.76	1542.75	0	6.4	17	Non	290.31	264.56	5.14	3.72	1032	>sp|P02817|AMELX_BOVIN Amelogenin, X isoform OS=Bos taurus OX=9913 GN=AMELX PE=1 SV=2	1	hf1_10472_ebo_22_1_261219.ScanId;v=1;d1=11518.11518.3	controllerType=0 controllerNumber=1 scan=11518	28.6489
00097:3	1	S.MP[+15.995]LPPHPGHPGYIN.F		P[+16]	514.923	3	1542.76	1542.75	0	2.5	17	Non	300.1	300.1	4	3.48	1032	>sp|P02817|AMELX_BOVIN Amelogenin, X isoform OS=Bos taurus OX=9913 GN=AMELX PE=1 SV=2	1	hf1_10472_ebo_22_1_261219.ScanId;v=1;d1=119.119.3	controllerType=0 controllerNumber=1 scan=119	0.3864
14141:3	1	S.MPLPPHPGHP[+15.995]GYIN.F		P[+16]	514.925	3	1542.76	1542.75	0	6	17	Non	307.92	258.63	8.59	3.7	1032	>sp|P02817|AMELX_BOVIN Amelogenin, X isoform OS=Bos taurus OX=9913 GN=AMELX PE=1 SV=2	1	hf1_10472_ebo_22_1_261219.ScanId;v=1;d1=11714.11714.3	controllerType=0 controllerNumber=1 scan=11714	28.9904
13527:3	1	S.MP[+15.995]LPPHPGHPGYIN.F		P[+16]	514.926	3	1542.76	1542.75	0	6.7	17	Non	313.51	313.51	5.8	4.15	1032	>sp|P02817|AMELX_BOVIN Amelogenin, X isoform OS=Bos taurus OX=9913 GN=AMELX PE=1 SV=2	1	hf1_10472_ebo_22_1_261219.ScanId;v=1;d1=11309.11309.3	controllerType=0 controllerNumber=1 scan=11309	28.2853
12886:3	1	S.M[+15.995]PLPPHPGHPGYIN.F		M[+16]	514.924	3	1542.76	1542.75	0	4.1	17	Non	362.05	362.05	6.11	4.75	1032	>sp|P02817|AMELX_BOVIN Amelogenin, X isoform OS=Bos taurus OX=9913 GN=AMELX PE=1 SV=2	1	hf1_10472_ebo_22_1_261219.ScanId;v=1;d1=10882.10882.3	controllerType=0 controllerNumber=1 scan=10882	27.5416
13230:3	1	S.M[+15.995]PLPPHPGHPGYIN.F		M[+16]	514.925	3	1542.76	1542.75	0	6	17	Non	371.82	371.82	6.93	5.02	1032	>sp|P02817|AMELX_BOVIN Amelogenin, X isoform OS=Bos taurus OX=9913 GN=AMELX PE=1 SV=2	1	hf1_10472_ebo_22_1_261219.ScanId;v=1;d1=11113.11113.3	controllerType=0 controllerNumber=1 scan=11113	27.9425
12613:3	1	S.MP[+15.995]LPPHPGHPGYIN.F		P[+16]	514.925	3	1542.76	1542.75	0	5.9	17	Non	390.96	390.96	4	5.18	1032	>sp|P02817|AMELX_BOVIN Amelogenin, X isoform OS=Bos taurus OX=9913 GN=AMELX PE=1 SV=2	1	hf1_10472_ebo_22_1_261219.ScanId;v=1;d1=10678.10678.3	controllerType=0 controllerNumber=1 scan=10678	27.1873
11415:3	1	S.M[+15.995]PLPPHPGHPGYIN.F		M[+16]	514.926	3	1542.76	1542.75	0	6.5	17	Non	398.63	398.63	15	5.67	1032	>sp|P02817|AMELX_BOVIN Amelogenin, X isoform OS=Bos taurus OX=9913 GN=AMELX PE=1 SV=2	1	hf1_10472_ebo_22_1_261219.ScanId;v=1;d1=9875.9875.3	controllerType=0 controllerNumber=1 scan=9875	25.7905
46102:3	1	S.MP[+15.995]LPPHPGHPGYIN.F		P[+16]	514.927	3	1542.77	1542.75	0	8.5	17	Non	409.43	409.43	4	4.87	1032	>sp|P02817|AMELX_BOVIN Amelogenin, X isoform OS=Bos taurus OX=9913 GN=AMELX PE=1 SV=2	1	hf1_10472_ebo_22_1_261219.ScanId;v=1;d1=34388.34388.3	controllerType=0 controllerNumber=1 scan=34388	73.5862
12023:3	1	S.MP[+15.995]LPPHPGHPGYIN.F		P[+16]	514.925	3	1542.76	1542.75	0	5.6	17	Non	409.44	409.44	4	5.41	1032	>sp|P02817|AMELX_BOVIN Amelogenin, X isoform OS=Bos taurus OX=9913 GN=AMELX PE=1 SV=2	1	hf1_10472_ebo_22_1_261219.ScanId;v=1;d1=10277.10277.3	controllerType=0 controllerNumber=1 scan=10277	26.4883
11138:3	1	S.M[+15.995]PLPPHPGHPGYIN.F		M[+16]	514.924	3	1542.76	1542.75	0	4.3	17	Non	454.51	454.51	4.2	6.15	1032	>sp|P02817|AMELX_BOVIN Amelogenin, X isoform OS=Bos taurus OX=9913 GN=AMELX PE=1 SV=2	1	hf1_10472_ebo_22_1_261219.ScanId;v=1;d1=9680.9680.3	controllerType=0 controllerNumber=1 scan=9680	25.4493
10858:3	1	S.M[+15.995]PLPPHPGHPGYIN.F		M[+16]	514.925	3	1542.76	1542.75	0	5.7	17	Non	455.62	455.62	13.54	5.5	1032	>sp|P02817|AMELX_BOVIN Amelogenin, X isoform OS=Bos taurus OX=9913 GN=AMELX PE=1 SV=2	1	hf1_10472_ebo_22_1_261219.ScanId;v=1;d1=9484.9484.3	controllerType=0 controllerNumber=1 scan=9484	25.1039
12331:3	1	S.M[+15.995]PLPPHPGHPGYIN.F		M[+16]	514.925	3	1542.76	1542.75	0	5.8	17	Non	462.64	462.64	17.22	6.15	1032	>sp|P02817|AMELX_BOVIN Amelogenin, X isoform OS=Bos taurus OX=9913 GN=AMELX PE=1 SV=2	1	hf1_10472_ebo_22_1_261219.ScanId;v=1;d1=10481.10481.3	controllerType=0 controllerNumber=1 scan=10481	26.8421
16388:3	1	S.MPLPPHPGHPGYIN[+0.984].F		N[+1]	509.92	3	1527.74	1527.74	0	2.4	17	Non	470.55	448.63	448.63	4.85	1032	>sp|P02817|AMELX_BOVIN Amelogenin, X isoform OS=Bos taurus OX=9913 GN=AMELX PE=1 SV=2	1	hf1_10472_ebo_22_1_261219.ScanId;v=1;d1=13238.13238.3	controllerType=0 controllerNumber=1 scan=13238	31.6197
11715:3	1	S.M[+15.995]PLPPHPGHPGYIN.F		M[+16]	514.926	3	1542.76	1542.75	0	6.6	17	Non	507.44	507.44	12.63	6.42	1032	>sp|P02817|AMELX_BOVIN Amelogenin, X isoform OS=Bos taurus OX=9913 GN=AMELX PE=1 SV=2	1	hf1_10472_ebo_22_1_261219.ScanId;v=1;d1=10074.10074.3	controllerType=0 controllerNumber=1 scan=10074	26.1362
11106:2	1	S.M[+15.995]PLPPHPGHPGYIN.F		M[+16]	771.882	2	1542.76	1542.75	0	2.6	17	Non	514.7	512.88	49.02	5.07	1032	>sp|P02817|AMELX_BOVIN Amelogenin, X isoform OS=Bos taurus OX=9913 GN=AMELX PE=1 SV=2	1	hf1_10472_ebo_22_1_261219.ScanId;v=1;d1=9652.9652.2	controllerType=0 controllerNumber=1 scan=9652	25.3947
12593:2	1	S.M[+15.995]PLPPHPGHPGYIN.F		M[+16]	771.884	2	1542.76	1542.75	0	5.6	17	Non	520.08	492.79	38.6	5.4	1032	>sp|P02817|AMELX_BOVIN Amelogenin, X isoform OS=Bos taurus OX=9913 GN=AMELX PE=1 SV=2	1	hf1_10472_ebo_22_1_261219.ScanId;v=1;d1=10662.10662.2	controllerType=0 controllerNumber=1 scan=10662	27.1587
11995:2	1	S.M[+15.995]PLPPHPGHPGYIN.F		M[+16]	771.885	2	1542.76	1542.75	0	6.7	17	Non	540.85	540.85	32.6	5.89	1032	>sp|P02817|AMELX_BOVIN Amelogenin, X isoform OS=Bos taurus OX=9913 GN=AMELX PE=1 SV=2	1	hf1_10472_ebo_22_1_261219.ScanId;v=1;d1=10258.10258.2	controllerType=0 controllerNumber=1 scan=10258	26.4542
12300:2	1	S.M[+15.995]PLPPHPGHPGYIN.F		M[+16]	771.884	2	1542.76	1542.75	0	5.5	17	Non	553.82	528.57	46.98	5.4	1032	>sp|P02817|AMELX_BOVIN Amelogenin, X isoform OS=Bos taurus OX=9913 GN=AMELX PE=1 SV=2	1	hf1_10472_ebo_22_1_261219.ScanId;v=1;d1=10462.10462.2	controllerType=0 controllerNumber=1 scan=10462	26.8091
11384:2	1	S.M[+15.995]PLPPHPGHPGYIN.F		M[+16]	771.883	2	1542.76	1542.75	0	4.5	17	Non	605.03	585.71	54.92	7.36	1032	>sp|P02817|AMELX_BOVIN Amelogenin, X isoform OS=Bos taurus OX=9913 GN=AMELX PE=1 SV=2	1	hf1_10472_ebo_22_1_261219.ScanId;v=1;d1=9854.9854.2	controllerType=0 controllerNumber=1 scan=9854	25.7536
11685:2	1	S.M[+15.995]PLPPHPGHPGYIN.F		M[+16]	771.884	2	1542.76	1542.75	0	5.6	17	Non	611.05	580.15	69.12	7.36	1032	>sp|P02817|AMELX_BOVIN Amelogenin, X isoform OS=Bos taurus OX=9913 GN=AMELX PE=1 SV=2	1	hf1_10472_ebo_22_1_261219.ScanId;v=1;d1=10053.10053.2	controllerType=0 controllerNumber=1 scan=10053	26.0995
10652:3	1	S.MP[+15.995]LPPHPGHP[+15.995]GYIN.F		P[+16]*2	520.257	3	1558.76	1558.75	0	5.8	17	Non	149.04	149.04	4	2.11	1032	>sp|P02817|AMELX_BOVIN Amelogenin, X isoform OS=Bos taurus OX=9913 GN=AMELX PE=1 SV=2	1	hf1_10472_ebo_22_1_261219.ScanId;v=1;d1=9344.9344.3	controllerType=0 controllerNumber=1 scan=9344	24.8606
09664:3	1	S.MP[+15.995]LPPHPGHP[+15.995]GYIN.F		P[+16]*2	520.256	3	1558.75	1558.75	0	5	17	Non	156.07	156.07	4	2.11	1032	>sp|P02817|AMELX_BOVIN Amelogenin, X isoform OS=Bos taurus OX=9913 GN=AMELX PE=1 SV=2	1	hf1_10472_ebo_22_1_261219.ScanId;v=1;d1=8683.8683.3	controllerType=0 controllerNumber=1 scan=8683	23.7124
09972:3	1	S.MP[+15.995]LPPHPGHP[+15.995]GYIN.F		P[+16]*2	520.256	3	1558.75	1558.75	0	4.7	17	Non	258.84	258.84	0	3.32	1032	>sp|P02817|AMELX_BOVIN Amelogenin, X isoform OS=Bos taurus OX=9913 GN=AMELX PE=1 SV=2	1	hf1_10472_ebo_22_1_261219.ScanId;v=1;d1=8887.8887.3	controllerType=0 controllerNumber=1 scan=8887	24.0693
10271:3	1	S.MP[+15.995]LPPHPGHP[+15.995]GYIN.F		P[+16]*2	520.257	3	1558.76	1558.75	0	5.3	17	Non	328.96	328.96	4	4.07	1032	>sp|P02817|AMELX_BOVIN Amelogenin, X isoform OS=Bos taurus OX=9913 GN=AMELX PE=1 SV=2	1	hf1_10472_ebo_22_1_261219.ScanId;v=1;d1=9084.9084.3	controllerType=0 controllerNumber=1 scan=9084	24.4096
24206:3	1	S.MPLPPHPGHPGYINF.S			558.616	3	1673.83	1673.83	0	5.3	17	Non	412.06	384.46	384.46	5.21	1032	>sp|P02817|AMELX_BOVIN Amelogenin, X isoform OS=Bos taurus OX=9913 GN=AMELX PE=1 SV=2	1	hf1_10472_ebo_22_1_261219.ScanId;v=1;d1=18517.18517.3	controllerType=0 controllerNumber=1 scan=18517	40.7469
00141:3	1	S.MPLPPHPGHPGYINF.S			558.614	3	1673.83	1673.83	0	0.6	17	Non	419.33	400.31	400.31	4.43	1032	>sp|P02817|AMELX_BOVIN Amelogenin, X isoform OS=Bos taurus OX=9913 GN=AMELX PE=1 SV=2	1	hf1_10472_ebo_22_1_261219.ScanId;v=1;d1=148.148.3	controllerType=0 controllerNumber=1 scan=148	0.4357
23623:3	1	S.MPLPPHPGHPGYINF.S			558.618	3	1673.84	1673.83	0	7.7	17	Non	436.94	376.66	376.66	5.62	1032	>sp|P02817|AMELX_BOVIN Amelogenin, X isoform OS=Bos taurus OX=9913 GN=AMELX PE=1 SV=2	1	hf1_10472_ebo_22_1_261219.ScanId;v=1;d1=18118.18118.3	controllerType=0 controllerNumber=1 scan=18118	40.0547
22733:3	1	S.MPLPPHPGHPGYINF.S			558.618	3	1673.84	1673.83	0	8.3	17	Non	467.82	409.69	409.69	4.91	1032	>sp|P02817|AMELX_BOVIN Amelogenin, X isoform OS=Bos taurus OX=9913 GN=AMELX PE=1 SV=2	1	hf1_10472_ebo_22_1_261219.ScanId;v=1;d1=17524.17524.3	controllerType=0 controllerNumber=1 scan=17524	39.0224
23030:3	1	S.MPLPPHPGHPGYINF.S			558.618	3	1673.84	1673.83	0	8	17	Non	487.17	465.31	465.31	5.94	1032	>sp|P02817|AMELX_BOVIN Amelogenin, X isoform OS=Bos taurus OX=9913 GN=AMELX PE=1 SV=2	1	hf1_10472_ebo_22_1_261219.ScanId;v=1;d1=17722.17722.3	controllerType=0 controllerNumber=1 scan=17722	39.3653
22447:3	1	S.MPLPPHPGHPGYINF.S			558.617	3	1673.84	1673.83	0	6.4	17	Non	492.65	427.09	427.09	5.94	1032	>sp|P02817|AMELX_BOVIN Amelogenin, X isoform OS=Bos taurus OX=9913 GN=AMELX PE=1 SV=2	1	hf1_10472_ebo_22_1_261219.ScanId;v=1;d1=17326.17326.3	controllerType=0 controllerNumber=1 scan=17326	38.6809
23324:3	1	S.MPLPPHPGHPGYINF.S			558.618	3	1673.84	1673.83	0	7.4	17	Non	532.49	482.04	482.04	6.05	1032	>sp|P02817|AMELX_BOVIN Amelogenin, X isoform OS=Bos taurus OX=9913 GN=AMELX PE=1 SV=2	1	hf1_10472_ebo_22_1_261219.ScanId;v=1;d1=17920.17920.3	controllerType=0 controllerNumber=1 scan=17920	39.7099
23722:2	1	S.MPLPPHPGHPGYINF.S			837.423	2	1673.84	1673.83	0	7.2	17	Non	562.19	502.62	502.62	6.8	1032	>sp|P02817|AMELX_BOVIN Amelogenin, X isoform OS=Bos taurus OX=9913 GN=AMELX PE=1 SV=2	1	hf1_10472_ebo_22_1_261219.ScanId;v=1;d1=18184.18184.2	controllerType=0 controllerNumber=1 scan=18184	40.1704
21956:2	1	S.MPLPPHPGHPGYINF.S			837.422	2	1673.84	1673.83	0	6.1	17	Non	591.59	465.79	465.79	6.16	1032	>sp|P02817|AMELX_BOVIN Amelogenin, X isoform OS=Bos taurus OX=9913 GN=AMELX PE=1 SV=2	1	hf1_10472_ebo_22_1_261219.ScanId;v=1;d1=16991.16991.2	controllerType=0 controllerNumber=1 scan=16991	38.1003
22258:2	1	S.MPLPPHPGHPGYINF.S			837.42	2	1673.83	1673.83	0	4	17	Non	609.56	525.36	525.36	7.1	1032	>sp|P02817|AMELX_BOVIN Amelogenin, X isoform OS=Bos taurus OX=9913 GN=AMELX PE=1 SV=2	1	hf1_10472_ebo_22_1_261219.ScanId;v=1;d1=17194.17194.2	controllerType=0 controllerNumber=1 scan=17194	38.4536
22541:2	1	S.MPLPPHPGHPGYINF.S			837.421	2	1673.83	1673.83	0	5.3	17	Non	675.26	576.34	576.34	9.18	1032	>sp|P02817|AMELX_BOVIN Amelogenin, X isoform OS=Bos taurus OX=9913 GN=AMELX PE=1 SV=2	1	hf1_10472_ebo_22_1_261219.ScanId;v=1;d1=17392.17392.2	controllerType=0 controllerNumber=1 scan=17392	38.7945
23124:2	1	S.MPLPPHPGHPGYINF.S			837.422	2	1673.84	1673.83	0	6.2	17	Non	677.09	583.44	583.44	8.8	1032	>sp|P02817|AMELX_BOVIN Amelogenin, X isoform OS=Bos taurus OX=9913 GN=AMELX PE=1 SV=2	1	hf1_10472_ebo_22_1_261219.ScanId;v=1;d1=17788.17788.2	controllerType=0 controllerNumber=1 scan=17788	39.4812
22827:2	1	S.MPLPPHPGHPGYINF.S			837.422	2	1673.84	1673.83	0	6.1	17	Non	684.72	588.54	588.54	9.18	1032	>sp|P02817|AMELX_BOVIN Amelogenin, X isoform OS=Bos taurus OX=9913 GN=AMELX PE=1 SV=2	1	hf1_10472_ebo_22_1_261219.ScanId;v=1;d1=17590.17590.2	controllerType=0 controllerNumber=1 scan=17590	39.1365
23427:2	1	S.MPLPPHPGHPGYINF.S			837.422	2	1673.84	1673.83	0	6	17	Non	757.46	648.05	648.05	11.18	1032	>sp|P02817|AMELX_BOVIN Amelogenin, X isoform OS=Bos taurus OX=9913 GN=AMELX PE=1 SV=2	1	hf1_10472_ebo_22_1_261219.ScanId;v=1;d1=17986.17986.2	controllerType=0 controllerNumber=1 scan=17986	39.8246
43340:3	1	S.MP[+15.995]LPPHPGHPGYINF.S		P[+16]	563.949	3	1689.83	1689.82	0	7.3	17	Non	156.86	156.86	4	2.13	1032	>sp|P02817|AMELX_BOVIN Amelogenin, X isoform OS=Bos taurus OX=9913 GN=AMELX PE=1 SV=2	1	hf1_10472_ebo_22_1_261219.ScanId;v=1;d1=31415.31415.3	controllerType=0 controllerNumber=1 scan=31415	63.771
23945:3	1	S.MP[+15.995]LPPHPGHPGYINF.S		P[+16]	563.948	3	1689.83	1689.82	0	4.8	17	Non	159.9	159.9	5.8	2.12	1032	>sp|P02817|AMELX_BOVIN Amelogenin, X isoform OS=Bos taurus OX=9913 GN=AMELX PE=1 SV=2	1	hf1_10472_ebo_22_1_261219.ScanId;v=1;d1=18340.18340.2	controllerType=0 controllerNumber=1 scan=18340	40.44
17013:3	1	S.MP[+15.995]LPPHPGHPGYINF.S		P[+16]	563.949	3	1689.83	1689.82	0	7.8	17	Non	171.33	171.33	4	2.13	1032	>sp|P02817|AMELX_BOVIN Amelogenin, X isoform OS=Bos taurus OX=9913 GN=AMELX PE=1 SV=2	1	hf1_10472_ebo_22_1_261219.ScanId;v=1;d1=13660.13660.3	controllerType=0 controllerNumber=1 scan=13660	32.3509
24215:3	1	S.MP[+15.995]LPPHPGHPGYINF.S		P[+16]	563.949	3	1689.83	1689.82	0	6.4	17	Non	242.4	242.4	5.8	3.74	1032	>sp|P02817|AMELX_BOVIN Amelogenin, X isoform OS=Bos taurus OX=9913 GN=AMELX PE=1 SV=2	1	hf1_10472_ebo_22_1_261219.ScanId;v=1;d1=18523.18523.3	controllerType=0 controllerNumber=1 scan=18523	40.756
25055:3	1	S.MPLPPHPGHPGYIN[+0.984]F.S		N[+1]	558.944	3	1674.82	1674.81	0	4.2	17	Non	258.15	258.15	258.15	3.48	1032	>sp|P02817|AMELX_BOVIN Amelogenin, X isoform OS=Bos taurus OX=9913 GN=AMELX PE=1 SV=2	1	hf1_10472_ebo_22_1_261219.ScanId;v=1;d1=19097.19097.3	controllerType=0 controllerNumber=1 scan=19097	41.7531
20605:3	1	S.MP[+31.990]LPPHPGHPGYINF.S		P[+32]	569.279	3	1705.82	1705.82	0	4.5	17	Non	308.68	308.68	1.8	4.05	1032	>sp|P02817|AMELX_BOVIN Amelogenin, X isoform OS=Bos taurus OX=9913 GN=AMELX PE=1 SV=2	1	hf1_10472_ebo_22_1_261219.ScanId;v=1;d1=16083.16083.3	controllerType=0 controllerNumber=1 scan=16083	36.5162
17344:3	1	S.MP[+15.995]LPPHPGHPGYINF.S		P[+16]	563.948	3	1689.83	1689.82	0	5.9	17	Non	315.69	315.69	4	4.06	1032	>sp|P02817|AMELX_BOVIN Amelogenin, X isoform OS=Bos taurus OX=9913 GN=AMELX PE=1 SV=2	1	hf1_10472_ebo_22_1_261219.ScanId;v=1;d1=13878.13878.3	controllerType=0 controllerNumber=1 scan=13878	32.7232
46067:3	1	S.MP[+15.995]LPPHPGHPGYINF.S		P[+16]	563.95	3	1689.84	1689.82	0	8.9	17	Non	319.22	319.22	4	3.53	1032	>sp|P02817|AMELX_BOVIN Amelogenin, X isoform OS=Bos taurus OX=9913 GN=AMELX PE=1 SV=2	1	hf1_10472_ebo_22_1_261219.ScanId;v=1;d1=34359.34359.3	controllerType=0 controllerNumber=1 scan=34359	73.537
21203:3	1	S.MP[+15.995]LPPHPGHPGYINF.S		P[+16]	563.947	3	1689.83	1689.82	0	4.1	17	Non	330.72	330.72	5.8	3.81	1032	>sp|P02817|AMELX_BOVIN Amelogenin, X isoform OS=Bos taurus OX=9913 GN=AMELX PE=1 SV=2	1	hf1_10472_ebo_22_1_261219.ScanId;v=1;d1=16483.16483.3	controllerType=0 controllerNumber=1 scan=16483	37.2186
23692:3	1	S.MP[+15.995]LPPHPGHPGYINF.S		P[+16]	563.946	3	1689.82	1689.82	0	2.4	17	Non	351.24	351.24	5.8	3.8	1032	>sp|P02817|AMELX_BOVIN Amelogenin, X isoform OS=Bos taurus OX=9913 GN=AMELX PE=1 SV=2	1	hf1_10472_ebo_22_1_261219.ScanId;v=1;d1=18164.18164.3	controllerType=0 controllerNumber=1 scan=18164	40.1347
21512:3	1	S.MP[+15.995]LPPHPGHPGYINF.S		P[+16]	563.947	3	1689.83	1689.82	0	3.7	17	Non	366.36	366.36	5.8	4.76	1032	>sp|P02817|AMELX_BOVIN Amelogenin, X isoform OS=Bos taurus OX=9913 GN=AMELX PE=1 SV=2	1	hf1_10472_ebo_22_1_261219.ScanId;v=1;d1=16691.16691.3	controllerType=0 controllerNumber=1 scan=16691	37.5772
20010:3	1	S.MP[+15.995]LPPHPGHPGYINF.S		P[+16]	563.949	3	1689.83	1689.82	0	7.7	17	Non	368.44	368.44	4	5.62	1032	>sp|P02817|AMELX_BOVIN Amelogenin, X isoform OS=Bos taurus OX=9913 GN=AMELX PE=1 SV=2	1	hf1_10472_ebo_22_1_261219.ScanId;v=1;d1=15688.15688.3	controllerType=0 controllerNumber=1 scan=15688	35.8392
20905:3	1	S.MP[+15.995]LPPHPGHPGYINF.S		P[+16]	563.948	3	1689.83	1689.82	0	4.9	17	Non	376.06	376.06	5.8	5.21	1032	>sp|P02817|AMELX_BOVIN Amelogenin, X isoform OS=Bos taurus OX=9913 GN=AMELX PE=1 SV=2	1	hf1_10472_ebo_22_1_261219.ScanId;v=1;d1=16283.16283.3	controllerType=0 controllerNumber=1 scan=16283	36.8656
20607:3	1	S.M[+15.995]PLPPHPGHPGYINF.S		M[+16]	563.95	3	1689.83	1689.82	0	8.2	17	Non	381.98	381.98	4.33	4.67	1032	>sp|P02817|AMELX_BOVIN Amelogenin, X isoform OS=Bos taurus OX=9913 GN=AMELX PE=1 SV=2	1	hf1_10472_ebo_22_1_261219.ScanId;v=1;d1=16085.16085.3	controllerType=0 controllerNumber=1 scan=16085	36.5219
19704:3	1	S.MP[+15.995]LPPHPGHPGYINF.S		P[+16]	563.95	3	1689.83	1689.82	0	8	17	Non	408.58	408.58	0.37	4.82	1032	>sp|P02817|AMELX_BOVIN Amelogenin, X isoform OS=Bos taurus OX=9913 GN=AMELX PE=1 SV=2	1	hf1_10472_ebo_22_1_261219.ScanId;v=1;d1=15479.15479.3	controllerType=0 controllerNumber=1 scan=15479	35.4842
19416:3	1	S.MP[+15.995]LPPHPGHPGYINF.S		P[+16]	563.949	3	1689.83	1689.82	0	7.2	17	Non	413.47	413.47	4	5.62	1032	>sp|P02817|AMELX_BOVIN Amelogenin, X isoform OS=Bos taurus OX=9913 GN=AMELX PE=1 SV=2	1	hf1_10472_ebo_22_1_261219.ScanId;v=1;d1=15276.15276.3	controllerType=0 controllerNumber=1 scan=15276	35.131
22105:3	1	S.MPLPPHPGH[+15.995]PGYINF.S		H[+16]	563.948	3	1689.83	1689.82	0	4.9	17	Non	425.71	425.71	0	5.21	1032	>sp|P02817|AMELX_BOVIN Amelogenin, X isoform OS=Bos taurus OX=9913 GN=AMELX PE=1 SV=2	1	hf1_10472_ebo_22_1_261219.ScanId;v=1;d1=17090.17090.3	controllerType=0 controllerNumber=1 scan=17090	38.2731
21812:3	1	S.MPLPPHP[+15.995]GHPGYINF.S		P[+16]	563.948	3	1689.83	1689.82	0	4.6	17	Non	427.41	427.41	0	5.21	1032	>sp|P02817|AMELX_BOVIN Amelogenin, X isoform OS=Bos taurus OX=9913 GN=AMELX PE=1 SV=2	1	hf1_10472_ebo_22_1_261219.ScanId;v=1;d1=16892.16892.3	controllerType=0 controllerNumber=1 scan=16892	37.9281
20021:2	1	S.M[+15.995]PLPPHPGHPGYINF.S		M[+16]	845.419	2	1689.83	1689.82	0	5.6	17	Non	449.28	414.68	27.53	5.31	1032	>sp|P02817|AMELX_BOVIN Amelogenin, X isoform OS=Bos taurus OX=9913 GN=AMELX PE=1 SV=2	1	hf1_10472_ebo_22_1_261219.ScanId;v=1;d1=15697.15697.3	controllerType=0 controllerNumber=1 scan=15697	35.8526
20935:2	1	S.M[+15.995]PLPPHPGHPGYINF.S		M[+16]	845.418	2	1689.83	1689.82	0	5.1	17	Non	452.53	452.53	34.9	5.31	1032	>sp|P02817|AMELX_BOVIN Amelogenin, X isoform OS=Bos taurus OX=9913 GN=AMELX PE=1 SV=2	1	hf1_10472_ebo_22_1_261219.ScanId;v=1;d1=16305.16305.2	controllerType=0 controllerNumber=1 scan=16305	36.9052
20639:2	1	S.M[+15.995]PLPPHPGHPGYINF.S		M[+16]	845.42	2	1689.83	1689.82	0	6.8	17	Non	466.46	466.46	37.18	5.94	1032	>sp|P02817|AMELX_BOVIN Amelogenin, X isoform OS=Bos taurus OX=9913 GN=AMELX PE=1 SV=2	1	hf1_10472_ebo_22_1_261219.ScanId;v=1;d1=16107.16107.2	controllerType=0 controllerNumber=1 scan=16107	36.5601
24207:3	1	S.MPLPPHPGHPGYIN[+0.984]F.S		N[+1]	558.944	3	1674.82	1674.81	0	3.9	17	Non	486.39	486.39	486.39	5.24	1032	>sp|P02817|AMELX_BOVIN Amelogenin, X isoform OS=Bos taurus OX=9913 GN=AMELX PE=1 SV=2	1	hf1_10472_ebo_22_1_261219.ScanId;v=1;d1=18517.18517.3	controllerType=0 controllerNumber=1 scan=18517	40.7469
24494:3	1	S.MPLPPHPGHPGYIN[+0.984]F.S		N[+1]	558.944	3	1674.82	1674.81	0	5.3	17	Non	500.24	499.36	499.36	5.44	1032	>sp|P02817|AMELX_BOVIN Amelogenin, X isoform OS=Bos taurus OX=9913 GN=AMELX PE=1 SV=2	1	hf1_10472_ebo_22_1_261219.ScanId;v=1;d1=18715.18715.3	controllerType=0 controllerNumber=1 scan=18715	41.0884
24012:2	1	S.MPLPPHPGHPGYIN[+0.984]F.S		N[+1]	837.912	2	1674.82	1674.81	0	4.3	17	Non	522.28	513.92	513.92	5.57	1032	>sp|P02817|AMELX_BOVIN Amelogenin, X isoform OS=Bos taurus OX=9913 GN=AMELX PE=1 SV=2	1	hf1_10472_ebo_22_1_261219.ScanId;v=1;d1=18386.18386.2	controllerType=0 controllerNumber=1 scan=18386	40.5187
19146:2	1	S.M[+15.995]PLPPHPGHPGYINF.S		M[+16]	845.417	2	1689.83	1689.82	0	3.8	17	Non	524.81	406.86	51.55	5.14	1032	>sp|P02817|AMELX_BOVIN Amelogenin, X isoform OS=Bos taurus OX=9913 GN=AMELX PE=1 SV=2	1	hf1_10472_ebo_22_1_261219.ScanId;v=1;d1=15086.15086.2	controllerType=0 controllerNumber=1 scan=15086	34.8038
23909:3	1	S.MPLPPHPGHPGYIN[+0.984]F.S		N[+1]	558.944	3	1674.82	1674.81	0	5	17	Non	533.13	533.13	533.13	5.78	1032	>sp|P02817|AMELX_BOVIN Amelogenin, X isoform OS=Bos taurus OX=9913 GN=AMELX PE=1 SV=2	1	hf1_10472_ebo_22_1_261219.ScanId;v=1;d1=18316.18316.3	controllerType=0 controllerNumber=1 scan=18316	40.3983
20012:2	1	S.M[+15.995]PLPPHPGHPGYINF.S		M[+16]	845.418	2	1689.83	1689.82	0	5.2	17	Non	585.55	526.56	53.2	6.53	1032	>sp|P02817|AMELX_BOVIN Amelogenin, X isoform OS=Bos taurus OX=9913 GN=AMELX PE=1 SV=2	1	hf1_10472_ebo_22_1_261219.ScanId;v=1;d1=15690.15690.2	controllerType=0 controllerNumber=1 scan=15690	35.8405
23723:2	1	S.MPLPPHPGHPGYIN[+0.984]F.S		N[+1]	837.913	2	1674.82	1674.81	0	5.3	17	Non	597.18	585.23	585.23	6.31	1032	>sp|P02817|AMELX_BOVIN Amelogenin, X isoform OS=Bos taurus OX=9913 GN=AMELX PE=1 SV=2	1	hf1_10472_ebo_22_1_261219.ScanId;v=1;d1=18184.18184.2	controllerType=0 controllerNumber=1 scan=18184	40.1704
19432:2	1	S.M[+15.995]PLPPHPGHPGYINF.S		M[+16]	845.418	2	1689.83	1689.82	0	4.5	17	Non	635.95	524.12	52.97	7.53	1032	>sp|P02817|AMELX_BOVIN Amelogenin, X isoform OS=Bos taurus OX=9913 GN=AMELX PE=1 SV=2	1	hf1_10472_ebo_22_1_261219.ScanId;v=1;d1=15287.15287.2	controllerType=0 controllerNumber=1 scan=15287	35.148
19720:2	1	S.M[+15.995]PLPPHPGHPGYINF.S		M[+16]	845.419	2	1689.83	1689.82	0	5.5	17	Non	646.5	545.18	70.49	7.53	1032	>sp|P02817|AMELX_BOVIN Amelogenin, X isoform OS=Bos taurus OX=9913 GN=AMELX PE=1 SV=2	1	hf1_10472_ebo_22_1_261219.ScanId;v=1;d1=15490.15490.2	controllerType=0 controllerNumber=1 scan=15490	35.5009
20327:2	1	S.M[+15.995]PLPPHPGHPGYINF.S		M[+16]	845.42	2	1689.83	1689.82	0	6.9	17	Non	646.66	540.14	48.11	7.8	1032	>sp|P02817|AMELX_BOVIN Amelogenin, X isoform OS=Bos taurus OX=9913 GN=AMELX PE=1 SV=2	1	hf1_10472_ebo_22_1_261219.ScanId;v=1;d1=15902.15902.2	controllerType=0 controllerNumber=1 scan=15902	36.2034
18484:2	1	S.M[+15.995]PLPPHPGHPGY[+15.995]INF.S		M[+16], Y[+16]	853.415	2	1705.82	1705.82	0	3.9	17	Non	274.72	274.72	0	3.09	1032	>sp|P02817|AMELX_BOVIN Amelogenin, X isoform OS=Bos taurus OX=9913 GN=AMELX PE=1 SV=2	1	hf1_10472_ebo_22_1_261219.ScanId;v=1;d1=14646.14646.5	controllerType=0 controllerNumber=1 scan=14646	34.0468
18246:3	1	S.MP[+15.995]LPPHPGHP[+15.995]GYINF.S		P[+16]*2	569.28	3	1705.83	1705.82	0	6.6	17	Non	306.24	306.24	4	4.32	1032	>sp|P02817|AMELX_BOVIN Amelogenin, X isoform OS=Bos taurus OX=9913 GN=AMELX PE=1 SV=2	1	hf1_10472_ebo_22_1_261219.ScanId;v=1;d1=14485.14485.3	controllerType=0 controllerNumber=1 scan=14485	33.7675
21000:2	1	S.M[+15.995]PLPPHPGHPGYIN[+0.984]F.S		M[+16], N[+1]	845.912	2	1690.82	1690.8	0	7.6	17	Non	324.23	306.43	10.78	4.35	1032	>sp|P02817|AMELX_BOVIN Amelogenin, X isoform OS=Bos taurus OX=9913 GN=AMELX PE=1 SV=2	1	hf1_10472_ebo_22_1_261219.ScanId;v=1;d1=16347.16347.2	controllerType=0 controllerNumber=1 scan=16347	36.9794
18839:3	1	S.MP[+15.995]LPPHPGHP[+15.995]GYINF.S		P[+16]*2	569.279	3	1705.82	1705.82	0	3.9	17	Non	333.45	333.45	4	3.8	1032	>sp|P02817|AMELX_BOVIN Amelogenin, X isoform OS=Bos taurus OX=9913 GN=AMELX PE=1 SV=2	1	hf1_10472_ebo_22_1_261219.ScanId;v=1;d1=14888.14888.3	controllerType=0 controllerNumber=1 scan=14888	34.4637
19192:3	1	S.MP[+15.995]LPPHPGH[+15.995]PGYINF.S		H[+16], P[+16]	569.278	3	1705.82	1705.82	0	3	17	Non	360.91	360.91	4	4.76	1032	>sp|P02817|AMELX_BOVIN Amelogenin, X isoform OS=Bos taurus OX=9913 GN=AMELX PE=1 SV=2	1	hf1_10472_ebo_22_1_261219.ScanId;v=1;d1=15116.15116.3	controllerType=0 controllerNumber=1 scan=15116	34.8506
18913:2	1	S.M[+15.995]PLPPHPGHP[+15.995]GYINF.S		M[+16], P[+16]	853.414	2	1705.82	1705.82	0	3.3	17	Non	377.87	377.87	1.94	4.77	1032	>sp|P02817|AMELX_BOVIN Amelogenin, X isoform OS=Bos taurus OX=9913 GN=AMELX PE=1 SV=2	1	hf1_10472_ebo_22_1_261219.ScanId;v=1;d1=14934.14934.2	controllerType=0 controllerNumber=1 scan=14934	34.5426
18538:3	1	S.MP[+15.995]LPPHPGHP[+15.995]GYINF.S		P[+16]*2	569.279	3	1705.82	1705.82	0	3.8	17	Non	383.48	383.48	4	4.78	1032	>sp|P02817|AMELX_BOVIN Amelogenin, X isoform OS=Bos taurus OX=9913 GN=AMELX PE=1 SV=2	1	hf1_10472_ebo_22_1_261219.ScanId;v=1;d1=14685.14685.3	controllerType=0 controllerNumber=1 scan=14685	34.1151
18176:2	1	S.M[+15.995]PLPPHPGHPGY[+15.995]INF.S		M[+16], Y[+16]	853.419	2	1705.83	1705.82	0	8.8	17	Non	390.89	390.89	0	4.66	1032	>sp|P02817|AMELX_BOVIN Amelogenin, X isoform OS=Bos taurus OX=9913 GN=AMELX PE=1 SV=2	1	hf1_10472_ebo_22_1_261219.ScanId;v=1;d1=14439.14439.2	controllerType=0 controllerNumber=1 scan=14439	33.6896
21204:3	1	S.M[+15.995]PLPPHPGHPGYIN[+0.984]F.S		M[+16], N[+1]	564.277	3	1690.82	1690.8	0	6.8	17	Non	399.7	399.7	3.12	5.47	1032	>sp|P02817|AMELX_BOVIN Amelogenin, X isoform OS=Bos taurus OX=9913 GN=AMELX PE=1 SV=2	1	hf1_10472_ebo_22_1_261219.ScanId;v=1;d1=16483.16483.3	controllerType=0 controllerNumber=1 scan=16483	37.2186
20936:2	1	S.M[+15.995]PLPPHPGHPGYIN[+0.984]F.S		M[+16], N[+1]	845.911	2	1690.81	1690.8	0	5.5	17	Non	422.45	405.38	50.95	5.2	1032	>sp|P02817|AMELX_BOVIN Amelogenin, X isoform OS=Bos taurus OX=9913 GN=AMELX PE=1 SV=2	1	hf1_10472_ebo_22_1_261219.ScanId;v=1;d1=16305.16305.2	controllerType=0 controllerNumber=1 scan=16305	36.9052
18608:2	1	S.M[+15.995]PLPPHPGHPGY[+15.995]INF.S		M[+16], Y[+16]	853.417	2	1705.83	1705.82	0	6.6	17	Non	429.93	429.93	0	5.63	1032	>sp|P02817|AMELX_BOVIN Amelogenin, X isoform OS=Bos taurus OX=9913 GN=AMELX PE=1 SV=2	1	hf1_10472_ebo_22_1_261219.ScanId;v=1;d1=14734.14734.2	controllerType=0 controllerNumber=1 scan=14734	34.1995
20811:3	1	S.MPLPPHPGHPGYINFS.Y			587.628	3	1760.87	1760.86	0	5.8	17	Non	245.37	104.03	104.03	2.14	1032	>sp|P02817|AMELX_BOVIN Amelogenin, X isoform OS=Bos taurus OX=9913 GN=AMELX PE=1 SV=2	1	hf1_10472_ebo_22_1_261219.ScanId;v=1;d1=16223.16223.3	controllerType=0 controllerNumber=1 scan=16223	36.7607
21470:3	1	S.MPLPPHPGHPGYINFS.Y			587.627	3	1760.87	1760.86	0	5.4	17	Non	258.63	45.69	45.69	2.14	1032	>sp|P02817|AMELX_BOVIN Amelogenin, X isoform OS=Bos taurus OX=9913 GN=AMELX PE=1 SV=2	1	hf1_10472_ebo_22_1_261219.ScanId;v=1;d1=16662.16662.3	controllerType=0 controllerNumber=1 scan=16662	37.5288
21168:3	1	S.MPLPPHPGHPGYINFS.Y			587.627	3	1760.87	1760.86	0	5.2	17	Non	336.15	170.47	170.47	3.58	1032	>sp|P02817|AMELX_BOVIN Amelogenin, X isoform OS=Bos taurus OX=9913 GN=AMELX PE=1 SV=2	1	hf1_10472_ebo_22_1_261219.ScanId;v=1;d1=16459.16459.3	controllerType=0 controllerNumber=1 scan=16459	37.1793
23707:2	1	S.MPLPPHPGHPGYINFS[+79.966].Y		S[+80]	920.921	2	1840.84	1840.82	0	6	17	Non	133.6	133.6	67.58	2.12	1032	>sp|P02817|AMELX_BOVIN Amelogenin, X isoform OS=Bos taurus OX=9913 GN=AMELX PE=1 SV=2	1	hf1_10472_ebo_22_1_261219.ScanId;v=1;d1=18175.18175.3	controllerType=0 controllerNumber=1 scan=18175	40.1541
18779:3	1	S.M[+15.995]PLPPHPGHPGYINFS.Y		M[+16]	592.958	3	1776.86	1776.85	0	4.3	17	Non	225.67	207.45	3.47	2.77	1032	>sp|P02817|AMELX_BOVIN Amelogenin, X isoform OS=Bos taurus OX=9913 GN=AMELX PE=1 SV=2	1	hf1_10472_ebo_22_1_261219.ScanId;v=1;d1=14849.14849.3	controllerType=0 controllerNumber=1 scan=14849	34.3959
23321:2	1	S.MPLPPHPGHPGYINFS[+79.966].Y		S[+80]	920.921	2	1840.84	1840.82	0	6.3	17	Non	267.59	267.59	114.64	4	1032	>sp|P02817|AMELX_BOVIN Amelogenin, X isoform OS=Bos taurus OX=9913 GN=AMELX PE=1 SV=2	1	hf1_10472_ebo_22_1_261219.ScanId;v=1;d1=17917.17917.3	controllerType=0 controllerNumber=1 scan=17917	39.7026
18477:3	1	S.MP[+15.995]LPPHPGHPGYINFS.Y		P[+16]	592.958	3	1776.86	1776.85	0	4.7	17	Non	316.86	294.01	4	4.06	1032	>sp|P02817|AMELX_BOVIN Amelogenin, X isoform OS=Bos taurus OX=9913 GN=AMELX PE=1 SV=2	1	hf1_10472_ebo_22_1_261219.ScanId;v=1;d1=14641.14641.3	controllerType=0 controllerNumber=1 scan=14641	34.0392
18180:3	1	S.MP[+15.995]LPPHPGHPGYINFS.Y		P[+16]	592.958	3	1776.86	1776.85	0	4.4	17	Non	320.88	279.16	4	3.91	1032	>sp|P02817|AMELX_BOVIN Amelogenin, X isoform OS=Bos taurus OX=9913 GN=AMELX PE=1 SV=2	1	hf1_10472_ebo_22_1_261219.ScanId;v=1;d1=14441.14441.3	controllerType=0 controllerNumber=1 scan=14441	33.6919
24758:3	1	S.MPLPPHPGHPGYINFS[+79.966].Y		S[+80]	614.284	3	1840.84	1840.82	0	6.7	17	Non	335.24	335.24	195.4	4.49	1032	>sp|P02817|AMELX_BOVIN Amelogenin, X isoform OS=Bos taurus OX=9913 GN=AMELX PE=1 SV=2	1	hf1_10472_ebo_22_1_261219.ScanId;v=1;d1=18897.18897.3	controllerType=0 controllerNumber=1 scan=18897	41.4075
17582:3	1	S.MP[+15.995]LPPHPGHPGYINFS.Y		P[+16]	592.958	3	1776.86	1776.85	0	4.6	17	Non	338.99	266.6	4	3.9	1032	>sp|P02817|AMELX_BOVIN Amelogenin, X isoform OS=Bos taurus OX=9913 GN=AMELX PE=1 SV=2	1	hf1_10472_ebo_22_1_261219.ScanId;v=1;d1=14037.14037.3	controllerType=0 controllerNumber=1 scan=14037	32.9977
24479:3	1	S.MPLPPHPGHPGYINFS[+79.966].Y		S[+80]	614.284	3	1840.84	1840.82	0	6.8	17	Non	339.65	339.65	208.16	4.49	1032	>sp|P02817|AMELX_BOVIN Amelogenin, X isoform OS=Bos taurus OX=9913 GN=AMELX PE=1 SV=2	1	hf1_10472_ebo_22_1_261219.ScanId;v=1;d1=18704.18704.3	controllerType=0 controllerNumber=1 scan=18704	41.0695
24239:2	1	S.MPLPPHPGHPGYINFS[+79.966].Y		S[+80]	920.921	2	1840.83	1840.82	0	5.8	17	Non	401.9	401.9	204.28	5.21	1032	>sp|P02817|AMELX_BOVIN Amelogenin, X isoform OS=Bos taurus OX=9913 GN=AMELX PE=1 SV=2	1	hf1_10472_ebo_22_1_261219.ScanId;v=1;d1=18540.18540.2	controllerType=0 controllerNumber=1 scan=18540	40.7867
22690:3	1	S.MPLPPHPGHPGYINFS[+79.966].Y		S[+80]	614.283	3	1840.84	1840.82	0	6	17	Non	413.22	413.22	245.92	5.21	1032	>sp|P02817|AMELX_BOVIN Amelogenin, X isoform OS=Bos taurus OX=9913 GN=AMELX PE=1 SV=2	1	hf1_10472_ebo_22_1_261219.ScanId;v=1;d1=17495.17495.3	controllerType=0 controllerNumber=1 scan=17495	38.9713
24180:3	1	S.MPLPPHPGHPGYINFS[+79.966].Y		S[+80]	614.283	3	1840.83	1840.82	0	5.4	17	Non	441.36	441.36	277.08	5.45	1032	>sp|P02817|AMELX_BOVIN Amelogenin, X isoform OS=Bos taurus OX=9913 GN=AMELX PE=1 SV=2	1	hf1_10472_ebo_22_1_261219.ScanId;v=1;d1=18499.18499.3	controllerType=0 controllerNumber=1 scan=18499	40.7151
23290:3	1	S.MPLPPHPGHPGYINFS[+79.966].Y		S[+80]	614.284	3	1840.84	1840.82	0	7.1	17	Non	462.3	462.3	276.97	5.72	1032	>sp|P02817|AMELX_BOVIN Amelogenin, X isoform OS=Bos taurus OX=9913 GN=AMELX PE=1 SV=2	1	hf1_10472_ebo_22_1_261219.ScanId;v=1;d1=17898.17898.3	controllerType=0 controllerNumber=1 scan=17898	39.6714
22996:3	1	S.MPLPPHPGHPGYINFS[+79.966].Y		S[+80]	614.284	3	1840.84	1840.82	0	6.9	17	Non	473.37	420.42	331.52	6.59	1032	>sp|P02817|AMELX_BOVIN Amelogenin, X isoform OS=Bos taurus OX=9913 GN=AMELX PE=1 SV=2	1	hf1_10472_ebo_22_1_261219.ScanId;v=1;d1=17700.17700.3	controllerType=0 controllerNumber=1 scan=17700	39.3267
23879:3	1	S.MPLPPHPGHPGYINFS[+79.966].Y		S[+80]	614.283	3	1840.84	1840.82	0	6	17	Non	475.86	475.86	254	5.67	1032	>sp|P02817|AMELX_BOVIN Amelogenin, X isoform OS=Bos taurus OX=9913 GN=AMELX PE=1 SV=2	1	hf1_10472_ebo_22_1_261219.ScanId;v=1;d1=18295.18295.3	controllerType=0 controllerNumber=1 scan=18295	40.3626
23592:3	1	S.MPLPPHPGHPGYINFS[+79.966].Y		S[+80]	614.284	3	1840.84	1840.82	0	7.7	17	Non	519.74	519.74	317.39	6.59	1032	>sp|P02817|AMELX_BOVIN Amelogenin, X isoform OS=Bos taurus OX=9913 GN=AMELX PE=1 SV=2	1	hf1_10472_ebo_22_1_261219.ScanId;v=1;d1=18096.18096.3	controllerType=0 controllerNumber=1 scan=18096	40.016
24529:2	1	S.MPLPPHPGHPGYINFS[+79.966].Y		S[+80]	920.921	2	1840.84	1840.82	0	6.3	17	Non	537.65	537.65	273.85	5.84	1032	>sp|P02817|AMELX_BOVIN Amelogenin, X isoform OS=Bos taurus OX=9913 GN=AMELX PE=1 SV=2	1	hf1_10472_ebo_22_1_261219.ScanId;v=1;d1=18739.18739.2	controllerType=0 controllerNumber=1 scan=18739	41.1324
22755:2	1	S.MPLPPHPGHPGYINFS[+79.966].Y		S[+80]	920.922	2	1840.84	1840.82	0	7.2	17	Non	575.48	575.48	280.83	6.8	1032	>sp|P02817|AMELX_BOVIN Amelogenin, X isoform OS=Bos taurus OX=9913 GN=AMELX PE=1 SV=2	1	hf1_10472_ebo_22_1_261219.ScanId;v=1;d1=17539.17539.2	controllerType=0 controllerNumber=1 scan=17539	39.0473
23360:2	1	S.MPLPPHPGHPGYINFS[+79.966].Y		S[+80]	920.922	2	1840.84	1840.82	0	6.5	17	Non	711.14	547.34	366.69	10.45	1032	>sp|P02817|AMELX_BOVIN Amelogenin, X isoform OS=Bos taurus OX=9913 GN=AMELX PE=1 SV=2	1	hf1_10472_ebo_22_1_261219.ScanId;v=1;d1=17942.17942.2	controllerType=0 controllerNumber=1 scan=17942	39.7484
23942:2	1	S.MPLPPHPGHPGYINFS[+79.966].Y		S[+80]	920.921	2	1840.83	1840.82	0	5.7	17	Non	718.4	718.4	373.79	10.18	1032	>sp|P02817|AMELX_BOVIN Amelogenin, X isoform OS=Bos taurus OX=9913 GN=AMELX PE=1 SV=2	1	hf1_10472_ebo_22_1_261219.ScanId;v=1;d1=18338.18338.2	controllerType=0 controllerNumber=1 scan=18338	40.437
23061:2	1	S.MPLPPHPGHPGYINFS[+79.966].Y		S[+80]	920.922	2	1840.84	1840.82	0	6.8	17	Non	734.7	734.7	349.26	10.45	1032	>sp|P02817|AMELX_BOVIN Amelogenin, X isoform OS=Bos taurus OX=9913 GN=AMELX PE=1 SV=2	1	hf1_10472_ebo_22_1_261219.ScanId;v=1;d1=17744.17744.2	controllerType=0 controllerNumber=1 scan=17744	39.404
23658:2	1	S.MPLPPHPGHPGYINFS[+79.966].Y		S[+80]	920.922	2	1840.84	1840.82	0	6.4	17	Non	781.21	781.21	371.46	11.45	1032	>sp|P02817|AMELX_BOVIN Amelogenin, X isoform OS=Bos taurus OX=9913 GN=AMELX PE=1 SV=2	1	hf1_10472_ebo_22_1_261219.ScanId;v=1;d1=18140.18140.2	controllerType=0 controllerNumber=1 scan=18140	40.0933
43556:3	1	S.MP[+15.995]LPPHPGHPGYINFS[+79.966].Y		P[+16], S[+80]	619.616	3	1856.83	1856.82	0	7.2	17	Non	51.3	51.3	4	2.11	1032	>sp|P02817|AMELX_BOVIN Amelogenin, X isoform OS=Bos taurus OX=9913 GN=AMELX PE=1 SV=2	1	hf1_10472_ebo_22_1_261219.ScanId;v=1;d1=31559.31559.3	controllerType=0 controllerNumber=1 scan=31559	64.0286
25566:3	1	S.MPLPPHPGHPGYIN[+0.984]FS[+79.966].Y		N[+1], S[+80]	614.611	3	1841.82	1841.81	0	5.4	17	Non	113.43	113.43	113.43	1.87	1032	>sp|P02817|AMELX_BOVIN Amelogenin, X isoform OS=Bos taurus OX=9913 GN=AMELX PE=1 SV=2	1	hf1_10472_ebo_22_1_261219.ScanId;v=1;d1=19444.19444.3	controllerType=0 controllerNumber=1 scan=19444	42.3531
22759:2	1	S.M[+15.995]PLPPHPGHPGYINFS[+79.966].Y		M[+16], S[+80]	928.918	2	1856.83	1856.82	0	5.7	17	Non	129.6	129.6	6.43	2.12	1032	>sp|P02817|AMELX_BOVIN Amelogenin, X isoform OS=Bos taurus OX=9913 GN=AMELX PE=1 SV=2	1	hf1_10472_ebo_22_1_261219.ScanId;v=1;d1=17542.17542.2	controllerType=0 controllerNumber=1 scan=17542	39.0518
23416:3	1	S.MPLPPHPGHP[+15.995]GYINFS[+79.966].Y		P[+16], S[+80]	619.613	3	1856.83	1856.82	0	3.4	17	Non	176.87	176.87	0	2.32	1032	>sp|P02817|AMELX_BOVIN Amelogenin, X isoform OS=Bos taurus OX=9913 GN=AMELX PE=1 SV=2	1	hf1_10472_ebo_22_1_261219.ScanId;v=1;d1=17978.17978.3	controllerType=0 controllerNumber=1 scan=17978	39.8098
22526:3	1	S.MPLPPHPGH[+15.995]PGYINFS[+79.966].Y		H[+16], S[+80]	619.612	3	1856.82	1856.82	0	1.1	17	Non	201.49	201.49	0	2.13	1032	>sp|P02817|AMELX_BOVIN Amelogenin, X isoform OS=Bos taurus OX=9913 GN=AMELX PE=1 SV=2	1	hf1_10472_ebo_22_1_261219.ScanId;v=1;d1=17379.17379.3	controllerType=0 controllerNumber=1 scan=17379	38.7695
25252:3	1	S.MPLPPHPGHPGYIN[+0.984]FS[+79.966].Y		N[+1], S[+80]	614.61	3	1841.82	1841.81	0	4.5	17	Non	249.2	249.2	224.9	3.74	1032	>sp|P02817|AMELX_BOVIN Amelogenin, X isoform OS=Bos taurus OX=9913 GN=AMELX PE=1 SV=2	1	hf1_10472_ebo_22_1_261219.ScanId;v=1;d1=19236.19236.3	controllerType=0 controllerNumber=1 scan=19236	41.9944
18780:3	1	S.MP[+15.995]LPPHPGHPGYIN[+0.984]FS.Y		N[+1], P[+16]	593.287	3	1777.85	1777.84	0	5.7	17	Non	265.52	251.05	4	3.72	1032	>sp|P02817|AMELX_BOVIN Amelogenin, X isoform OS=Bos taurus OX=9913 GN=AMELX PE=1 SV=2	1	hf1_10472_ebo_22_1_261219.ScanId;v=1;d1=14849.14849.3	controllerType=0 controllerNumber=1 scan=14849	34.3959
23110:3	1	S.MPLPP[+15.995]HPGHPGYINFS[+79.966].Y		P[+16], S[+80]	619.614	3	1856.83	1856.82	0	4.6	17	Non	285.82	285.82	0	3.8	1032	>sp|P02817|AMELX_BOVIN Amelogenin, X isoform OS=Bos taurus OX=9913 GN=AMELX PE=1 SV=2	1	hf1_10472_ebo_22_1_261219.ScanId;v=1;d1=17778.17778.3	controllerType=0 controllerNumber=1 scan=17778	39.4633
22205:3	1	S.MP[+15.995]LPPHPGHPGYINFS[+79.966].Y		P[+16], S[+80]	619.608	3	1856.81	1856.82	0	-4.5	17	Non	290.72	290.72	28.22	2.69	1032	>sp|P02817|AMELX_BOVIN Amelogenin, X isoform OS=Bos taurus OX=9913 GN=AMELX PE=1 SV=2	1	hf1_10472_ebo_22_1_261219.ScanId;v=1;d1=17156.17156.3	controllerType=0 controllerNumber=1 scan=17156	38.3859
00066:3	1	S.MP[+15.995]LPPHPGHPGYINFS[+79.966].Y		P[+16], S[+80]	619.612	3	1856.82	1856.82	0	2.1	17	Non	290.94	290.94	4	3.17	1032	>sp|P02817|AMELX_BOVIN Amelogenin, X isoform OS=Bos taurus OX=9913 GN=AMELX PE=1 SV=2	1	hf1_10472_ebo_22_1_261219.ScanId;v=1;d1=93.93.3	controllerType=0 controllerNumber=1 scan=93	0.3389
22816:3	1	S.MPLPP[+15.995]HPGHPGYINFS[+79.966].Y		P[+16], S[+80]	619.614	3	1856.83	1856.82	0	4.8	17	Non	291.58	291.58	2.62	4.05	1032	>sp|P02817|AMELX_BOVIN Amelogenin, X isoform OS=Bos taurus OX=9913 GN=AMELX PE=1 SV=2	1	hf1_10472_ebo_22_1_261219.ScanId;v=1;d1=17582.17582.3	controllerType=0 controllerNumber=1 scan=17582	39.1221
21315:3	1	S.MP[+15.995]LPPHPGHPGYINFS[+79.966].Y		P[+16], S[+80]	619.61	3	1856.82	1856.82	0	-1.2	17	Non	300.75	300.75	4	3.2	1032	>sp|P02817|AMELX_BOVIN Amelogenin, X isoform OS=Bos taurus OX=9913 GN=AMELX PE=1 SV=2	1	hf1_10472_ebo_22_1_261219.ScanId;v=1;d1=16556.16556.3	controllerType=0 controllerNumber=1 scan=16556	37.3447
00175:2	1	S.MP[+15.995]LPPHPGHPGYINFS[+79.966].Y		P[+16], S[+80]	928.914	2	1856.82	1856.82	0	1.5	17	Non	305.23	305.23	4	3.53	1032	>sp|P02817|AMELX_BOVIN Amelogenin, X isoform OS=Bos taurus OX=9913 GN=AMELX PE=1 SV=2	1	hf1_10472_ebo_22_1_261219.ScanId;v=1;d1=172.172.2	controllerType=0 controllerNumber=1 scan=172	0.4777
21612:3	1	S.MP[+15.995]LPPHPGHPGYINFS[+79.966].Y		P[+16], S[+80]	619.61	3	1856.82	1856.82	0	-2	17	Non	321.33	321.33	4	3.02	1032	>sp|P02817|AMELX_BOVIN Amelogenin, X isoform OS=Bos taurus OX=9913 GN=AMELX PE=1 SV=2	1	hf1_10472_ebo_22_1_261219.ScanId;v=1;d1=16760.16760.3	controllerType=0 controllerNumber=1 scan=16760	37.6976
21013:3	1	S.M[+15.995]PLPPHPGHPGYINFS[+79.966].Y		M[+16], S[+80]	619.611	3	1856.82	1856.82	0	-0.1	17	Non	327.08	327.08	4.46	3.37	1032	>sp|P02817|AMELX_BOVIN Amelogenin, X isoform OS=Bos taurus OX=9913 GN=AMELX PE=1 SV=2	1	hf1_10472_ebo_22_1_261219.ScanId;v=1;d1=16355.16355.3	controllerType=0 controllerNumber=1 scan=16355	36.9942
20719:3	1	S.MP[+15.995]LPPHPGHPGYINFS[+79.966].Y		P[+16], S[+80]	619.612	3	1856.82	1856.82	0	1	17	Non	328.99	328.99	4	3.34	1032	>sp|P02817|AMELX_BOVIN Amelogenin, X isoform OS=Bos taurus OX=9913 GN=AMELX PE=1 SV=2	1	hf1_10472_ebo_22_1_261219.ScanId;v=1;d1=16162.16162.3	controllerType=0 controllerNumber=1 scan=16162	36.6559
19835:3	1	S.MP[+15.995]LPPHPGHPGYINFS[+79.966].Y		P[+16], S[+80]	619.614	3	1856.83	1856.82	0	4.7	17	Non	344.24	344.24	4	4.39	1032	>sp|P02817|AMELX_BOVIN Amelogenin, X isoform OS=Bos taurus OX=9913 GN=AMELX PE=1 SV=2	1	hf1_10472_ebo_22_1_261219.ScanId;v=1;d1=15567.15567.3	controllerType=0 controllerNumber=1 scan=15567	35.6323
20424:3	1	S.MP[+15.995]LPPHPGHPGYINFS[+79.966].Y		P[+16], S[+80]	619.614	3	1856.83	1856.82	0	3.7	17	Non	358.66	358.66	4	3.96	1032	>sp|P02817|AMELX_BOVIN Amelogenin, X isoform OS=Bos taurus OX=9913 GN=AMELX PE=1 SV=2	1	hf1_10472_ebo_22_1_261219.ScanId;v=1;d1=15964.15964.3	controllerType=0 controllerNumber=1 scan=15964	36.3104
25418:2	1	S.MPLPPHPGHPGYIN[+0.984]FS[+79.966].Y		N[+1], S[+80]	921.412	2	1841.82	1841.81	0	4.4	17	Non	359.39	326.05	212.13	4.39	1032	>sp|P02817|AMELX_BOVIN Amelogenin, X isoform OS=Bos taurus OX=9913 GN=AMELX PE=1 SV=2	1	hf1_10472_ebo_22_1_261219.ScanId;v=1;d1=19345.19345.2	controllerType=0 controllerNumber=1 scan=19345	42.1825
19552:3	1	S.M[+15.995]PLPPHPGHPGYINFS[+79.966].Y		M[+16], S[+80]	619.614	3	1856.83	1856.82	0	4.5	17	Non	361.1	361.1	6.2	5.21	1032	>sp|P02817|AMELX_BOVIN Amelogenin, X isoform OS=Bos taurus OX=9913 GN=AMELX PE=1 SV=2	1	hf1_10472_ebo_22_1_261219.ScanId;v=1;d1=15374.15374.3	controllerType=0 controllerNumber=1 scan=15374	35.2953
46090:3	1	S.MP[+15.995]LPPHPGHPGYINFS[+79.966].Y		P[+16], S[+80]	619.617	3	1856.84	1856.82	0	9.1	17	Non	362.58	362.58	4	4.82	1032	>sp|P02817|AMELX_BOVIN Amelogenin, X isoform OS=Bos taurus OX=9913 GN=AMELX PE=1 SV=2	1	hf1_10472_ebo_22_1_261219.ScanId;v=1;d1=34377.34377.3	controllerType=0 controllerNumber=1 scan=34377	73.567
21433:2	1	S.M[+15.995]PLPPHPGHPGYINFS[+79.966].Y		M[+16], S[+80]	928.911	2	1856.81	1856.82	0	-2.7	17	Non	366.75	366.75	15.6	4.09	1032	>sp|P02817|AMELX_BOVIN Amelogenin, X isoform OS=Bos taurus OX=9913 GN=AMELX PE=1 SV=2	1	hf1_10472_ebo_22_1_261219.ScanId;v=1;d1=16634.16634.2	controllerType=0 controllerNumber=1 scan=16634	37.4798
20121:3	1	S.MP[+15.995]LPPHPGHPGYINFS[+79.966].Y		P[+16], S[+80]	619.615	3	1856.83	1856.82	0	5.3	17	Non	376.59	376.59	4	5.58	1032	>sp|P02817|AMELX_BOVIN Amelogenin, X isoform OS=Bos taurus OX=9913 GN=AMELX PE=1 SV=2	1	hf1_10472_ebo_22_1_261219.ScanId;v=1;d1=15766.15766.3	controllerType=0 controllerNumber=1 scan=15766	35.972
19272:3	1	S.M[+15.995]PLPPHPGHPGYINFS[+79.966].Y		M[+16], S[+80]	619.614	3	1856.83	1856.82	0	4.9	17	Non	387.21	387.21	5.89	5.35	1032	>sp|P02817|AMELX_BOVIN Amelogenin, X isoform OS=Bos taurus OX=9913 GN=AMELX PE=1 SV=2	1	hf1_10472_ebo_22_1_261219.ScanId;v=1;d1=15174.15174.3	controllerType=0 controllerNumber=1 scan=15174	34.954
25061:3	1	S.MPLPPHPGHPGYIN[+0.984]FS[+79.966].Y		N[+1], S[+80]	614.61	3	1841.82	1841.81	0	4.6	17	Non	391.42	352.11	283.47	4.5	1032	>sp|P02817|AMELX_BOVIN Amelogenin, X isoform OS=Bos taurus OX=9913 GN=AMELX PE=1 SV=2	1	hf1_10472_ebo_22_1_261219.ScanId;v=1;d1=19102.19102.3	controllerType=0 controllerNumber=1 scan=19102	41.7621
19080:2	1	S.M[+15.995]PLPPHPGHPGYINFS[+79.966].Y		M[+16], S[+80]	928.918	2	1856.83	1856.82	0	5.1	17	Non	424.12	424.12	24.19	5.36	1032	>sp|P02817|AMELX_BOVIN Amelogenin, X isoform OS=Bos taurus OX=9913 GN=AMELX PE=1 SV=2	1	hf1_10472_ebo_22_1_261219.ScanId;v=1;d1=15043.15043.2	controllerType=0 controllerNumber=1 scan=15043	34.7311
24480:3	1	S.MPLPPHPGHPGYIN[+0.984]FS[+79.966].Y		N[+1], S[+80]	614.611	3	1841.82	1841.81	0	6.2	17	Non	512.85	452.53	368.48	5.94	1032	>sp|P02817|AMELX_BOVIN Amelogenin, X isoform OS=Bos taurus OX=9913 GN=AMELX PE=1 SV=2	1	hf1_10472_ebo_22_1_261219.ScanId;v=1;d1=18704.18704.3	controllerType=0 controllerNumber=1 scan=18704	41.0695
24759:3	1	S.MPLPPHPGHPGYIN[+0.984]FS[+79.966].Y		N[+1], S[+80]	614.611	3	1841.82	1841.81	0	5.7	17	Non	527.11	417.55	364.35	5.78	1032	>sp|P02817|AMELX_BOVIN Amelogenin, X isoform OS=Bos taurus OX=9913 GN=AMELX PE=1 SV=2	1	hf1_10472_ebo_22_1_261219.ScanId;v=1;d1=18897.18897.3	controllerType=0 controllerNumber=1 scan=18897	41.4075
20837:2	1	S.M[+15.995]PLPPHPGHPGYINFS[+79.966].Y		M[+16], S[+80]	928.912	2	1856.82	1856.82	0	-1	17	Non	540.6	540.6	23.2	5.4	1032	>sp|P02817|AMELX_BOVIN Amelogenin, X isoform OS=Bos taurus OX=9913 GN=AMELX PE=1 SV=2	1	hf1_10472_ebo_22_1_261219.ScanId;v=1;d1=16239.16239.2	controllerType=0 controllerNumber=1 scan=16239	36.7903
21123:2	1	S.M[+15.995]PLPPHPGHPGYINFS[+79.966].Y		M[+16], S[+80]	928.911	2	1856.82	1856.82	0	-1.9	17	Non	542.91	542.91	25.43	4.52	1032	>sp|P02817|AMELX_BOVIN Amelogenin, X isoform OS=Bos taurus OX=9913 GN=AMELX PE=1 SV=2	1	hf1_10472_ebo_22_1_261219.ScanId;v=1;d1=16430.16430.2	controllerType=0 controllerNumber=1 scan=16430	37.1294
25121:2	1	S.MPLPPHPGHPGYIN[+0.984]FS[+79.966].Y		N[+1], S[+80]	921.412	2	1841.82	1841.81	0	4.8	17	Non	561.58	464.24	319.19	6.53	1032	>sp|P02817|AMELX_BOVIN Amelogenin, X isoform OS=Bos taurus OX=9913 GN=AMELX PE=1 SV=2	1	hf1_10472_ebo_22_1_261219.ScanId;v=1;d1=19145.19145.2	controllerType=0 controllerNumber=1 scan=19145	41.8373
20240:2	1	S.M[+15.995]PLPPHPGHPGYINFS[+79.966].Y		M[+16], S[+80]	928.919	2	1856.83	1856.82	0	6.8	17	Non	565.83	565.83	30.47	7.45	1032	>sp|P02817|AMELX_BOVIN Amelogenin, X isoform OS=Bos taurus OX=9913 GN=AMELX PE=1 SV=2	1	hf1_10472_ebo_22_1_261219.ScanId;v=1;d1=15843.15843.2	controllerType=0 controllerNumber=1 scan=15843	36.105
19383:2	1	S.M[+15.995]PLPPHPGHPGYINFS[+79.966].Y		M[+16], S[+80]	928.918	2	1856.83	1856.82	0	4.9	17	Non	568.87	568.87	16.81	6.53	1032	>sp|P02817|AMELX_BOVIN Amelogenin, X isoform OS=Bos taurus OX=9913 GN=AMELX PE=1 SV=2	1	hf1_10472_ebo_22_1_261219.ScanId;v=1;d1=15251.15251.2	controllerType=0 controllerNumber=1 scan=15251	35.0856
24240:2	1	S.MPLPPHPGHPGYIN[+0.984]FS[+79.966].Y		N[+1], S[+80]	921.413	2	1841.82	1841.81	0	5.6	17	Non	577.43	577.43	332.91	7.18	1032	>sp|P02817|AMELX_BOVIN Amelogenin, X isoform OS=Bos taurus OX=9913 GN=AMELX PE=1 SV=2	1	hf1_10472_ebo_22_1_261219.ScanId;v=1;d1=18540.18540.2	controllerType=0 controllerNumber=1 scan=18540	40.7867
19650:2	1	S.M[+15.995]PLPPHPGHPGYINFS[+79.966].Y		M[+16], S[+80]	928.919	2	1856.83	1856.82	0	6	17	Non	593.24	593.24	28.19	7.18	1032	>sp|P02817|AMELX_BOVIN Amelogenin, X isoform OS=Bos taurus OX=9913 GN=AMELX PE=1 SV=2	1	hf1_10472_ebo_22_1_261219.ScanId;v=1;d1=15446.15446.2	controllerType=0 controllerNumber=1 scan=15446	35.4275
20540:2	1	S.M[+15.995]PLPPHPGHPGYINFS[+79.966].Y		M[+16], S[+80]	928.915	2	1856.82	1856.82	0	2.2	17	Non	614.63	614.63	31.89	7.26	1032	>sp|P02817|AMELX_BOVIN Amelogenin, X isoform OS=Bos taurus OX=9913 GN=AMELX PE=1 SV=2	1	hf1_10472_ebo_22_1_261219.ScanId;v=1;d1=16041.16041.2	controllerType=0 controllerNumber=1 scan=16041	36.4458
24813:2	1	S.MPLPPHPGHPGYIN[+0.984]FS[+79.966].Y		N[+1], S[+80]	921.414	2	1841.82	1841.81	0	6.5	17	Non	622.84	484.6	375.18	7.8	1032	>sp|P02817|AMELX_BOVIN Amelogenin, X isoform OS=Bos taurus OX=9913 GN=AMELX PE=1 SV=2	1	hf1_10472_ebo_22_1_261219.ScanId;v=1;d1=18937.18937.2	controllerType=0 controllerNumber=1 scan=18937	41.4776
24530:2	1	S.MPLPPHPGHPGYIN[+0.984]FS[+79.966].Y		N[+1], S[+80]	921.413	2	1841.82	1841.81	0	6.1	17	Non	649.44	502.18	367.02	8.18	1032	>sp|P02817|AMELX_BOVIN Amelogenin, X isoform OS=Bos taurus OX=9913 GN=AMELX PE=1 SV=2	1	hf1_10472_ebo_22_1_261219.ScanId;v=1;d1=18739.18739.2	controllerType=0 controllerNumber=1 scan=18739	41.1324
19947:2	1	S.M[+15.995]PLPPHPGHPGYINFS[+79.966].Y		M[+16], S[+80]	928.919	2	1856.83	1856.82	0	6.2	17	Non	657.93	657.93	37.63	9.45	1032	>sp|P02817|AMELX_BOVIN Amelogenin, X isoform OS=Bos taurus OX=9913 GN=AMELX PE=1 SV=2	1	hf1_10472_ebo_22_1_261219.ScanId;v=1;d1=15644.15644.2	controllerType=0 controllerNumber=1 scan=15644	35.7643
19642:3	1	S.MP[+15.995]LPPHPGHP[+15.995]GYINFS[+79.966].Y		P[+16]*2, S[+80]	624.944	3	1872.82	1872.81	0	2.8	17	Non	156.28	156.28	0	1.75	1032	>sp|P02817|AMELX_BOVIN Amelogenin, X isoform OS=Bos taurus OX=9913 GN=AMELX PE=1 SV=2	1	hf1_10472_ebo_22_1_261219.ScanId;v=1;d1=15441.15441.3	controllerType=0 controllerNumber=1 scan=15441	35.4173
20465:3	1	S.MP[+15.995]LPPHPGHP[+15.995]GYINFS[+79.966].Y		P[+16]*2, S[+80]	624.945	3	1872.82	1872.81	0	4.1	17	Non	224.03	224.03	3.51	2.47	1032	>sp|P02817|AMELX_BOVIN Amelogenin, X isoform OS=Bos taurus OX=9913 GN=AMELX PE=1 SV=2	1	hf1_10472_ebo_22_1_261219.ScanId;v=1;d1=15990.15990.3	controllerType=0 controllerNumber=1 scan=15990	36.355
20110:3	1	S.MP[+15.995]LPPHPGHP[+15.995]GYINFS[+79.966].Y		P[+16]*2, S[+80]	624.945	3	1872.82	1872.81	0	3.2	17	Non	252.91	252.91	3.11	3.31	1032	>sp|P02817|AMELX_BOVIN Amelogenin, X isoform OS=Bos taurus OX=9913 GN=AMELX PE=1 SV=2	1	hf1_10472_ebo_22_1_261219.ScanId;v=1;d1=15757.15757.3	controllerType=0 controllerNumber=1 scan=15757	35.953
18984:3	1	S.M[+15.995]PLPPHPGHPGY[+15.995]INFS[+79.966].Y		M[+16], S[+80], Y[+16]	624.946	3	1872.82	1872.81	0	5.1	17	Non	255.7	255.7	4.18	3.72	1032	>sp|P02817|AMELX_BOVIN Amelogenin, X isoform OS=Bos taurus OX=9913 GN=AMELX PE=1 SV=2	1	hf1_10472_ebo_22_1_261219.ScanId;v=1;d1=14980.14980.3	controllerType=0 controllerNumber=1 scan=14980	34.6213
19290:3	1	S.MP[+15.995]LPPHPGHP[+15.995]GYINFS[+79.966].Y		P[+16]*2, S[+80]	624.948	3	1872.83	1872.81	0	7.9	17	Non	340.89	340.89	1.1	4.51	1032	>sp|P02817|AMELX_BOVIN Amelogenin, X isoform OS=Bos taurus OX=9913 GN=AMELX PE=1 SV=2	1	hf1_10472_ebo_22_1_261219.ScanId;v=1;d1=15185.15185.3	controllerType=0 controllerNumber=1 scan=15185	34.9733
21613:3	1	S.MP[+15.995]LPPHPGHPGYIN[+0.984]FS[+79.966].Y		N[+1], P[+16], S[+80]	619.943	3	1857.82	1857.8	0	6.8	17	Non	414.07	411.81	4	5.85	1032	>sp|P02817|AMELX_BOVIN Amelogenin, X isoform OS=Bos taurus OX=9913 GN=AMELX PE=1 SV=2	1	hf1_10472_ebo_22_1_261219.ScanId;v=1;d1=16760.16760.3	controllerType=0 controllerNumber=1 scan=16760	37.6976
22190:2	1	S.M[+15.995]PLPPHPGHPGYIN[+0.984]FS[+79.966].Y		M[+16], N[+1], S[+80]	929.413	2	1857.82	1857.8	0	8.8	17	Non	465.37	421.12	26.2	5.14	1032	>sp|P02817|AMELX_BOVIN Amelogenin, X isoform OS=Bos taurus OX=9913 GN=AMELX PE=1 SV=2	1	hf1_10472_ebo_22_1_261219.ScanId;v=1;d1=17146.17146.2	controllerType=0 controllerNumber=1 scan=17146	38.3688
21906:3	1	S.M[+15.995]PLPPHPGHPGYIN[+0.984]FS[+79.966].Y		M[+16], N[+1], S[+80]	619.943	3	1857.81	1857.8	0	5.7	17	Non	467.39	448.64	15.12	5.67	1032	>sp|P02817|AMELX_BOVIN Amelogenin, X isoform OS=Bos taurus OX=9913 GN=AMELX PE=1 SV=2	1	hf1_10472_ebo_22_1_261219.ScanId;v=1;d1=16958.16958.3	controllerType=0 controllerNumber=1 scan=16958	38.0427
21848:2	1	S.M[+15.995]PLPPHPGHPGYIN[+0.984]FS[+79.966].Y		M[+16], N[+1], S[+80]	929.412	2	1857.82	1857.8	0	7.1	17	Non	502.51	446.79	10.45	5.72	1032	>sp|P02817|AMELX_BOVIN Amelogenin, X isoform OS=Bos taurus OX=9913 GN=AMELX PE=1 SV=2	1	hf1_10472_ebo_22_1_261219.ScanId;v=1;d1=16918.16918.2	controllerType=0 controllerNumber=1 scan=16918	37.9729
21124:2	1	S.M[+15.995]PLPPHPGHPGYIN[+0.984]FS[+79.966].Y		M[+16], N[+1], S[+80]	929.411	2	1857.82	1857.8	0	6.6	17	Non	559.26	501.89	29.34	6.06	1032	>sp|P02817|AMELX_BOVIN Amelogenin, X isoform OS=Bos taurus OX=9913 GN=AMELX PE=1 SV=2	1	hf1_10472_ebo_22_1_261219.ScanId;v=1;d1=16430.16430.2	controllerType=0 controllerNumber=1 scan=16430	37.1294
25840:3	1	S.MPLPPHPGHPGYINFS[+79.966]Y.E		S[+80]	668.638	3	2003.9	2003.89	0	6.4	17	Non	244.21	141.77	141.77	2.7	1032	>sp|P02817|AMELX_BOVIN Amelogenin, X isoform OS=Bos taurus OX=9913 GN=AMELX PE=1 SV=2	1	hf1_10472_ebo_22_1_261219.ScanId;v=1;d1=19636.19636.3	controllerType=0 controllerNumber=1 scan=19636	42.6843
26148:3	1	S.MPLPPHPGHPGYINFS[+79.966]Y.E		S[+80]	668.638	3	2003.9	2003.89	0	6.6	17	Non	426.22	329.61	301.14	4.77	1032	>sp|P02817|AMELX_BOVIN Amelogenin, X isoform OS=Bos taurus OX=9913 GN=AMELX PE=1 SV=2	1	hf1_10472_ebo_22_1_261219.ScanId;v=1;d1=19842.19842.3	controllerType=0 controllerNumber=1 scan=19842	43.0419
24071:3	1	S.MP[+15.995]LPPHPGHPGYINFS[+79.966]Y.E		P[+16], S[+80]	673.968	3	2019.89	2019.88	0	4.1	17	Non	147.7	147.7	5.8	1.75	1032	>sp|P02817|AMELX_BOVIN Amelogenin, X isoform OS=Bos taurus OX=9913 GN=AMELX PE=1 SV=2	1	hf1_10472_ebo_22_1_261219.ScanId;v=1;d1=18427.18427.3	controllerType=0 controllerNumber=1 scan=18427	40.59
22822:3	1	S.MP[+15.995]LPPHPGHPGYINFS[+79.966]Y.E		P[+16], S[+80]	673.969	3	2019.89	2019.88	0	4.4	17	Non	197.24	82.9	5.8	2.14	1032	>sp|P02817|AMELX_BOVIN Amelogenin, X isoform OS=Bos taurus OX=9913 GN=AMELX PE=1 SV=2	1	hf1_10472_ebo_22_1_261219.ScanId;v=1;d1=17586.17586.3	controllerType=0 controllerNumber=1 scan=17586	39.1277
22977:2	1	S.MP[+15.995]LPPHPGHPGYINFS[+79.966]Y.E		P[+16], S[+80]	1010.45	2	2019.89	2019.88	0	3.6	17	Non	255.21	255.21	4	3.69	1032	>sp|P02817|AMELX_BOVIN Amelogenin, X isoform OS=Bos taurus OX=9913 GN=AMELX PE=1 SV=2	1	hf1_10472_ebo_22_1_261219.ScanId;v=1;d1=17686.17686.2	controllerType=0 controllerNumber=1 scan=17686	39.3008
23783:3	1	S.MP[+15.995]LPPHPGHPGYINFS[+79.966]Y.E		P[+16], S[+80]	673.97	3	2019.9	2019.88	0	6.3	17	Non	273.05	132.93	5.8	2.9	1032	>sp|P02817|AMELX_BOVIN Amelogenin, X isoform OS=Bos taurus OX=9913 GN=AMELX PE=1 SV=2	1	hf1_10472_ebo_22_1_261219.ScanId;v=1;d1=18225.18225.3	controllerType=0 controllerNumber=1 scan=18225	40.2398
23401:2	1	S.MP[+15.995]LPPHPGHPGYINFS[+79.966]Y.E		P[+16], S[+80]	1010.45	2	2019.9	2019.88	0	7.6	17	Non	276.51	276.51	4	4.16	1032	>sp|P02817|AMELX_BOVIN Amelogenin, X isoform OS=Bos taurus OX=9913 GN=AMELX PE=1 SV=2	1	hf1_10472_ebo_22_1_261219.ScanId;v=1;d1=17967.17967.2	controllerType=0 controllerNumber=1 scan=17967	39.7905
23126:3	1	S.M[+15.995]PLPPHPGHPGYINFS[+79.966]Y.E		M[+16], S[+80]	673.97	3	2019.9	2019.88	0	6.9	17	Non	392.62	242.81	18.34	4.44	1032	>sp|P02817|AMELX_BOVIN Amelogenin, X isoform OS=Bos taurus OX=9913 GN=AMELX PE=1 SV=2	1	hf1_10472_ebo_22_1_261219.ScanId;v=1;d1=17789.17789.3	controllerType=0 controllerNumber=1 scan=17789	39.4824
23428:3	1	S.M[+15.995]PLPPHPGHPGYINFS[+79.966]Y.E		M[+16], S[+80]	673.97	3	2019.9	2019.88	0	6.3	17	Non	440.86	261.82	28.33	4.76	1032	>sp|P02817|AMELX_BOVIN Amelogenin, X isoform OS=Bos taurus OX=9913 GN=AMELX PE=1 SV=2	1	hf1_10472_ebo_22_1_261219.ScanId;v=1;d1=17987.17987.3	controllerType=0 controllerNumber=1 scan=17987	39.8261
25910:3	1	S.MPLPPHPGHPGYINFS[+79.966]YE.V		S[+80]	711.648	3	2132.93	2132.93	0	0.1	17	Non	165.44	165.44	109.34	2.16	1032	>sp|P02817|AMELX_BOVIN Amelogenin, X isoform OS=Bos taurus OX=9913 GN=AMELX PE=1 SV=2	1	hf1_10472_ebo_22_1_261219.ScanId;v=1;d1=19678.19678.2	controllerType=0 controllerNumber=1 scan=19678	42.7568
25955:3	1	S.MPLPPHPGHPGYINFS[+79.966]YE.V		S[+80]	711.649	3	2132.93	2132.93	0	1.7	17	Non	188.24	188.24	117.73	2.11	1032	>sp|P02817|AMELX_BOVIN Amelogenin, X isoform OS=Bos taurus OX=9913 GN=AMELX PE=1 SV=2	1	hf1_10472_ebo_22_1_261219.ScanId;v=1;d1=19708.19708.3	controllerType=0 controllerNumber=1 scan=19708	42.809
20145:3	1	S.MP[+15.995]LPPHPGHPGYINFSYE.V		P[+16]	690.329	3	2068.97	2068.96	0	6.5	17	Non	194.92	194.92	4	2.74	1032	>sp|P02817|AMELX_BOVIN Amelogenin, X isoform OS=Bos taurus OX=9913 GN=AMELX PE=1 SV=2	1	hf1_10472_ebo_22_1_261219.ScanId;v=1;d1=15781.15781.3	controllerType=0 controllerNumber=1 scan=15781	35.9973
25869:3	1	S.MPLPPHPGHPGYINFS[+79.966]YE.V		S[+80]	711.645	3	2132.92	2132.93	0	-4.5	17	Non	208.54	208.54	115.29	2.14	1032	>sp|P02817|AMELX_BOVIN Amelogenin, X isoform OS=Bos taurus OX=9913 GN=AMELX PE=1 SV=2	1	hf1_10472_ebo_22_1_261219.ScanId;v=1;d1=19654.19654.3	controllerType=0 controllerNumber=1 scan=19654	42.7169
24636:3	1	S.MPLPPHPGHPGYINFS[+79.966]YE.V		S[+80]	711.653	3	2132.94	2132.93	0	6.8	17	Non	257.37	198.91	178.96	3.43	1032	>sp|P02817|AMELX_BOVIN Amelogenin, X isoform OS=Bos taurus OX=9913 GN=AMELX PE=1 SV=2	1	hf1_10472_ebo_22_1_261219.ScanId;v=1;d1=18815.18815.3	controllerType=0 controllerNumber=1 scan=18815	41.2639
25463:2	1	S.MPLPPHPGHPGYINFS[+79.966]YE.V		S[+80]	1066.97	2	2132.94	2132.93	0	4.8	17	Non	285.73	285.73	178.99	4.07	1032	>sp|P02817|AMELX_BOVIN Amelogenin, X isoform OS=Bos taurus OX=9913 GN=AMELX PE=1 SV=2	1	hf1_10472_ebo_22_1_261219.ScanId;v=1;d1=19373.19373.2	controllerType=0 controllerNumber=1 scan=19373	42.2291
25089:2	1	S.MPLPPHPGHPGYINFS[+79.966]YE.V		S[+80]	1066.98	2	2132.94	2132.93	0	6.1	17	Non	462.75	462.75	285.66	6.6	1032	>sp|P02817|AMELX_BOVIN Amelogenin, X isoform OS=Bos taurus OX=9913 GN=AMELX PE=1 SV=2	1	hf1_10472_ebo_22_1_261219.ScanId;v=1;d1=19122.19122.2	controllerType=0 controllerNumber=1 scan=19122	41.7971
24933:3	1	S.MPLPPHPGHPGYINFS[+79.966]YE.V		S[+80]	711.653	3	2132.94	2132.93	0	6.2	17	Non	477.65	477.65	313.56	5.72	1032	>sp|P02817|AMELX_BOVIN Amelogenin, X isoform OS=Bos taurus OX=9913 GN=AMELX PE=1 SV=2	1	hf1_10472_ebo_22_1_261219.ScanId;v=1;d1=19014.19014.3	controllerType=0 controllerNumber=1 scan=19014	41.6109
23910:3	1	S.MP[+15.995]LPPHPGHPGYINFS[+79.966]YE.V		P[+16], S[+80]	716.981	3	2148.93	2148.92	0	1.4	17	Non	181.43	181.43	5.8	2.11	1032	>sp|P02817|AMELX_BOVIN Amelogenin, X isoform OS=Bos taurus OX=9913 GN=AMELX PE=1 SV=2	1	hf1_10472_ebo_22_1_261219.ScanId;v=1;d1=18317.18317.3	controllerType=0 controllerNumber=1 scan=18317	40.3998
23071:2	1	S.M[+15.995]PLPPHPGHPGYINFS[+79.966]YE.V		M[+16], S[+80]	1074.97	2	2148.93	2148.92	0	0.1	17	Non	262.05	262.05	8.28	2.79	1032	>sp|P02817|AMELX_BOVIN Amelogenin, X isoform OS=Bos taurus OX=9913 GN=AMELX PE=1 SV=2	1	hf1_10472_ebo_22_1_261219.ScanId;v=1;d1=17751.17751.2	controllerType=0 controllerNumber=1 scan=17751	39.4146
23627:3	1	S.M[+15.995]PLPPHPGHPGYINFS[+79.966]YE.V		M[+16], S[+80]	716.981	3	2148.93	2148.92	0	2.1	17	Non	264.45	264.45	16.03	2.68	1032	>sp|P02817|AMELX_BOVIN Amelogenin, X isoform OS=Bos taurus OX=9913 GN=AMELX PE=1 SV=2	1	hf1_10472_ebo_22_1_261219.ScanId;v=1;d1=18120.18120.3	controllerType=0 controllerNumber=1 scan=18120	40.0578
00087:3	1	S.MP[+15.995]LPPHPGHPGYINFS[+79.966]YE.V		P[+16], S[+80]	716.982	3	2148.93	2148.92	0	3.3	17	Non	287.36	287.36	3.86	3.64	1032	>sp|P02817|AMELX_BOVIN Amelogenin, X isoform OS=Bos taurus OX=9913 GN=AMELX PE=1 SV=2	1	hf1_10472_ebo_22_1_261219.ScanId;v=1;d1=111.111.3	controllerType=0 controllerNumber=1 scan=111	0.3716
22720:2	1	S.M[+15.995]PLPPHPGHPGYINFS[+79.966]YE.V		M[+16], S[+80]	1074.97	2	2148.94	2148.92	0	8.1	17	Non	330.99	330.99	35.06	4.09	1032	>sp|P02817|AMELX_BOVIN Amelogenin, X isoform OS=Bos taurus OX=9913 GN=AMELX PE=1 SV=2	1	hf1_10472_ebo_22_1_261219.ScanId;v=1;d1=17514.17514.2	controllerType=0 controllerNumber=1 scan=17514	39.0046
23329:3	1	S.M[+15.995]PLPPHPGHPGYINFS[+79.966]YE.V		M[+16], S[+80]	716.982	3	2148.93	2148.92	0	3.4	17	Non	380.73	380.73	9.05	4.78	1032	>sp|P02817|AMELX_BOVIN Amelogenin, X isoform OS=Bos taurus OX=9913 GN=AMELX PE=1 SV=2	1	hf1_10472_ebo_22_1_261219.ScanId;v=1;d1=17923.17923.3	controllerType=0 controllerNumber=1 scan=17923	39.7144
23031:3	1	S.M[+15.995]PLPPHPGHPGYINFS[+79.966]YE.V		M[+16], S[+80]	716.982	3	2148.93	2148.92	0	3	17	Non	422.57	422.57	17.47	4.92	1032	>sp|P02817|AMELX_BOVIN Amelogenin, X isoform OS=Bos taurus OX=9913 GN=AMELX PE=1 SV=2	1	hf1_10472_ebo_22_1_261219.ScanId;v=1;d1=17723.17723.3	controllerType=0 controllerNumber=1 scan=17723	39.3668
21822:2	1	S.M[+15.995]PLPPHPGHPGYINFS[+79.966]YE.V		M[+16], S[+80]	1074.97	2	2148.94	2148.92	0	7.3	17	Non	433.15	433.15	46.47	6.51	1032	>sp|P02817|AMELX_BOVIN Amelogenin, X isoform OS=Bos taurus OX=9913 GN=AMELX PE=1 SV=2	1	hf1_10472_ebo_22_1_261219.ScanId;v=1;d1=16900.16900.2	controllerType=0 controllerNumber=1 scan=16900	37.9401
22734:3	1	S.M[+15.995]PLPPHPGHPGYINFS[+79.966]YE.V		M[+16], S[+80]	716.982	3	2148.93	2148.92	0	3.7	17	Non	437.69	437.69	16.81	5.15	1032	>sp|P02817|AMELX_BOVIN Amelogenin, X isoform OS=Bos taurus OX=9913 GN=AMELX PE=1 SV=2	1	hf1_10472_ebo_22_1_261219.ScanId;v=1;d1=17525.17525.3	controllerType=0 controllerNumber=1 scan=17525	39.0234
22414:2	1	S.M[+15.995]PLPPHPGHPGYINFS[+79.966]YE.V		M[+16], S[+80]	1074.97	2	2148.94	2148.92	0	5.8	17	Non	438.86	438.86	37.28	5.58	1032	>sp|P02817|AMELX_BOVIN Amelogenin, X isoform OS=Bos taurus OX=9913 GN=AMELX PE=1 SV=2	1	hf1_10472_ebo_22_1_261219.ScanId;v=1;d1=17306.17306.2	controllerType=0 controllerNumber=1 scan=17306	38.6461
22448:3	1	S.M[+15.995]PLPPHPGHPGYINFS[+79.966]YE.V		M[+16], S[+80]	716.984	3	2148.94	2148.92	0	5.4	17	Non	468.09	468.09	22.44	5.67	1032	>sp|P02817|AMELX_BOVIN Amelogenin, X isoform OS=Bos taurus OX=9913 GN=AMELX PE=1 SV=2	1	hf1_10472_ebo_22_1_261219.ScanId;v=1;d1=17327.17327.3	controllerType=0 controllerNumber=1 scan=17327	38.6818
21860:3	1	S.M[+15.995]PLPPHPGHPGYINFS[+79.966]YE.V		M[+16], S[+80]	716.984	3	2148.94	2148.92	0	5.8	17	Non	472.87	472.87	31.47	5.67	1032	>sp|P02817|AMELX_BOVIN Amelogenin, X isoform OS=Bos taurus OX=9913 GN=AMELX PE=1 SV=2	1	hf1_10472_ebo_22_1_261219.ScanId;v=1;d1=16926.16926.3	controllerType=0 controllerNumber=1 scan=16926	37.9867
22162:3	1	S.M[+15.995]PLPPHPGHPGYINFS[+79.966]YE.V		M[+16], S[+80]	716.984	3	2148.94	2148.92	0	6	17	Non	494.01	494.01	27.81	5.67	1032	>sp|P02817|AMELX_BOVIN Amelogenin, X isoform OS=Bos taurus OX=9913 GN=AMELX PE=1 SV=2	1	hf1_10472_ebo_22_1_261219.ScanId;v=1;d1=17125.17125.3	controllerType=0 controllerNumber=1 scan=17125	38.3324
22124:2	1	S.M[+15.995]PLPPHPGHPGYINFS[+79.966]YE.V		M[+16], S[+80]	1074.97	2	2148.94	2148.92	0	7.1	17	Non	513.37	513.37	44.51	6.6	1032	>sp|P02817|AMELX_BOVIN Amelogenin, X isoform OS=Bos taurus OX=9913 GN=AMELX PE=1 SV=2	1	hf1_10472_ebo_22_1_261219.ScanId;v=1;d1=17102.17102.2	controllerType=0 controllerNumber=1 scan=17102	38.2939
23330:3	1	S.M[+15.995]PLPPHPGHPGYIN[+0.984]FS[+79.966]YE.V		M[+16], N[+1], S[+80]	717.313	3	2149.93	2149.91	0	7.5	17	Non	328.95	328.95	18.96	4.49	1032	>sp|P02817|AMELX_BOVIN Amelogenin, X isoform OS=Bos taurus OX=9913 GN=AMELX PE=1 SV=2	1	hf1_10472_ebo_22_1_261219.ScanId;v=1;d1=17923.17923.3	controllerType=0 controllerNumber=1 scan=17923	39.7144
30815:3	1	S.MPLPPHPGHPGYINFS[+79.966]YEVL.T		S[+80]	782.37	3	2345.1	2345.08	0	5.4	17	Non	151.23	151.23	109.6	1.34	1032	>sp|P02817|AMELX_BOVIN Amelogenin, X isoform OS=Bos taurus OX=9913 GN=AMELX PE=1 SV=2	1	hf1_10472_ebo_22_1_261219.ScanId;v=1;d1=23045.23045.3	controllerType=0 controllerNumber=1 scan=23045	48.6423
31286:3	1	S.MPLPPHPGHPGYINFS[+79.966]YEVL.T		S[+80]	782.371	3	2345.1	2345.08	0	6.6	17	Non	291.31	291.31	137.77	4.32	1032	>sp|P02817|AMELX_BOVIN Amelogenin, X isoform OS=Bos taurus OX=9913 GN=AMELX PE=1 SV=2	1	hf1_10472_ebo_22_1_261219.ScanId;v=1;d1=23366.23366.3	controllerType=0 controllerNumber=1 scan=23366	49.2116
30993:3	1	S.MPLPPHPGHPGYINFS[+79.966]YEVL.T		S[+80]	782.37	3	2345.09	2345.08	0	5	17	Non	304.9	304.9	127.04	4.05	1032	>sp|P02817|AMELX_BOVIN Amelogenin, X isoform OS=Bos taurus OX=9913 GN=AMELX PE=1 SV=2	1	hf1_10472_ebo_22_1_261219.ScanId;v=1;d1=23167.23167.3	controllerType=0 controllerNumber=1 scan=23167	48.8546
31970:3	1	S.MPLPPHPGHPGYIN[+0.984]FS[+79.966]YEVL.T		N[+1], S[+80]	782.698	3	2346.08	2346.07	0	5.7	17	Non	130.95	130.95	60.58	2.12	1032	>sp|P02817|AMELX_BOVIN Amelogenin, X isoform OS=Bos taurus OX=9913 GN=AMELX PE=1 SV=2	1	hf1_10472_ebo_22_1_261219.ScanId;v=1;d1=23821.23821.3	controllerType=0 controllerNumber=1 scan=23821	50.0123
31662:3	1	S.MPLPPHPGHPGYIN[+0.984]FS[+79.966]YEVL.T		N[+1], S[+80]	782.701	3	2346.09	2346.07	0	8.8	17	Non	152.03	152.03	49.88	1.56	1032	>sp|P02817|AMELX_BOVIN Amelogenin, X isoform OS=Bos taurus OX=9913 GN=AMELX PE=1 SV=2	1	hf1_10472_ebo_22_1_261219.ScanId;v=1;d1=23617.23617.3	controllerType=0 controllerNumber=1 scan=23617	49.6506
29256:3	1	S.MP[+15.995]LPPHPGHPGYINFS[+79.966]YEVL.T		P[+16], S[+80]	787.702	3	2361.09	2361.08	0	5.6	17	Non	210.59	210.59	7.3	2.77	1032	>sp|P02817|AMELX_BOVIN Amelogenin, X isoform OS=Bos taurus OX=9913 GN=AMELX PE=1 SV=2	1	hf1_10472_ebo_22_1_261219.ScanId;v=1;d1=21975.21975.5	controllerType=0 controllerNumber=1 scan=21975	46.7658
28901:3	1	S.MP[+15.995]LPPHPGHPGYINFS[+79.966]YEVL.T		P[+16], S[+80]	787.702	3	2361.09	2361.08	0	6.6	17	Non	215.19	215.19	5.8	2.99	1032	>sp|P02817|AMELX_BOVIN Amelogenin, X isoform OS=Bos taurus OX=9913 GN=AMELX PE=1 SV=2	1	hf1_10472_ebo_22_1_261219.ScanId;v=1;d1=21734.21734.5	controllerType=0 controllerNumber=1 scan=21734	46.3441
28755:2	1	S.MP[+15.995]LPPHPGHPGYINFS[+79.966]YEVL.T		P[+16], S[+80]	1181.05	2	2361.09	2361.08	0	6.4	17	Non	389.63	389.63	7	5.63	1032	>sp|P02817|AMELX_BOVIN Amelogenin, X isoform OS=Bos taurus OX=9913 GN=AMELX PE=1 SV=2	1	hf1_10472_ebo_22_1_261219.ScanId;v=1;d1=21633.21633.2	controllerType=0 controllerNumber=1 scan=21633	46.1679
28395:2	1	S.M[+15.995]PLPPHPGHPGYIN[+0.984]FS[+79.966]YEVL.T		M[+16], N[+1], S[+80]	1181.54	2	2362.08	2362.06	0	8.4	17	Non	308.69	272.85	5	3.13	1032	>sp|P02817|AMELX_BOVIN Amelogenin, X isoform OS=Bos taurus OX=9913 GN=AMELX PE=1 SV=2	1	hf1_10472_ebo_22_1_261219.ScanId;v=1;d1=21391.21391.4	controllerType=0 controllerNumber=1 scan=21391	45.7465
30449:3	1	S.MPLPPHPGHPGYINFS[+79.966]YEVLTP.L		S[+80]	848.405	3	2543.2	2543.18	0	6.8	17	Non	243.03	243.03	88.98	3.99	1032	>sp|P02817|AMELX_BOVIN Amelogenin, X isoform OS=Bos taurus OX=9913 GN=AMELX PE=1 SV=2	1	hf1_10472_ebo_22_1_261219.ScanId;v=1;d1=22786.22786.3	controllerType=0 controllerNumber=1 scan=22786	48.1878
27051:3	1	S.MP[+15.995]LPPHPGHPGYINFSYEVLTP.L		P[+16]	827.082	3	2479.23	2479.21	0	8.7	17	Non	281.44	281.44	4	3.77	1032	>sp|P02817|AMELX_BOVIN Amelogenin, X isoform OS=Bos taurus OX=9913 GN=AMELX PE=1 SV=2	1	hf1_10472_ebo_22_1_261219.ScanId;v=1;d1=20452.20452.3	controllerType=0 controllerNumber=1 scan=20452	44.1088
30724:3	1	S.MPLPPHPGHPGYINFS[+79.966]YEVLTP.L		S[+80]	848.404	3	2543.2	2543.18	0	5.9	17	Non	340	340	96.66	4.48	1032	>sp|P02817|AMELX_BOVIN Amelogenin, X isoform OS=Bos taurus OX=9913 GN=AMELX PE=1 SV=2	1	hf1_10472_ebo_22_1_261219.ScanId;v=1;d1=22982.22982.3	controllerType=0 controllerNumber=1 scan=22982	48.531
29377:3	1	S.MP[+15.995]LPPHPGHPGYINFS[+79.966]YEVLTP.L		P[+16], S[+80]	853.736	3	2559.19	2559.18	0	5.7	17	Non	140.37	140.37	5.8	1.51	1032	>sp|P02817|AMELX_BOVIN Amelogenin, X isoform OS=Bos taurus OX=9913 GN=AMELX PE=1 SV=2	1	hf1_10472_ebo_22_1_261219.ScanId;v=1;d1=22059.22059.3	controllerType=0 controllerNumber=1 scan=22059	46.9144
28507:3	1	S.MP[+15.995]LPPHPGHPGYINFS[+79.966]YEVLTP.L		P[+16], S[+80]	853.736	3	2559.19	2559.18	0	6.2	17	Non	288.06	288.06	13.74	4.32	1032	>sp|P02817|AMELX_BOVIN Amelogenin, X isoform OS=Bos taurus OX=9913 GN=AMELX PE=1 SV=2	1	hf1_10472_ebo_22_1_261219.ScanId;v=1;d1=21462.21462.3	controllerType=0 controllerNumber=1 scan=21462	45.8702
31279:3	1	S.MPLPPHPGHP[+31.990]GY[+15.995]INF[+31.990]SYEVLTP.L		F[+32], P[+32], Y[+16]	848.402	3	2543.19	2543.19	0	0.4	17	Non	203.13	203.13	0	2.35	1032	>sp|P02817|AMELX_BOVIN Amelogenin, X isoform OS=Bos taurus OX=9913 GN=AMELX PE=1 SV=2	1	hf1_10472_ebo_22_1_261219.ScanId;v=1;d1=23361.23361.3	controllerType=0 controllerNumber=1 scan=23361	49.2013
28397:2	1	S.MP[+15.995]LPPHPGHP[+15.995]GY[+31.990]INF[+31.990]SYEVLTP.L		F[+32], P[+16]*2, Y[+32]	1280.11	2	2559.2	2559.19	0	7	17	Non	123.22	123.22	2	2.16	1032	>sp|P02817|AMELX_BOVIN Amelogenin, X isoform OS=Bos taurus OX=9913 GN=AMELX PE=1 SV=2	1	hf1_10472_ebo_22_1_261219.ScanId;v=1;d1=21392.21392.2	controllerType=0 controllerNumber=1 scan=21392	45.748
41684:3	1	S.MPLPPHPGHPGYINFS[+79.966]YEVLTPL.K		S[+80]	886.102	3	2656.29	2656.27	0	9.1	17	Non	73.51	73.51	11.56	1.42	1032	>sp|P02817|AMELX_BOVIN Amelogenin, X isoform OS=Bos taurus OX=9913 GN=AMELX PE=1 SV=2	1	hf1_10472_ebo_22_1_261219.ScanId;v=1;d1=30263.30263.3	controllerType=0 controllerNumber=1 scan=30263	61.5177
33985:4	1	S.MPLPPHPGHPGYINFS[+79.966]YEVLTPL.K		S[+80]	664.826	4	2656.28	2656.27	0	5.6	17	Non	129.83	129.83	19.52	1.69	1032	>sp|P02817|AMELX_BOVIN Amelogenin, X isoform OS=Bos taurus OX=9913 GN=AMELX PE=1 SV=2	1	hf1_10472_ebo_22_1_261219.ScanId;v=1;d1=25156.25156.4	controllerType=0 controllerNumber=1 scan=25156	52.3815
37917:3	1	S.MPLPPHPGHPGYINFS[+79.966]YEVLTPL.K		S[+80]	886.098	3	2656.28	2656.27	0	4.5	17	Non	142.94	68.87	15.5	2.11	1032	>sp|P02817|AMELX_BOVIN Amelogenin, X isoform OS=Bos taurus OX=9913 GN=AMELX PE=1 SV=2	1	hf1_10472_ebo_22_1_261219.ScanId;v=1;d1=27769.27769.3	controllerType=0 controllerNumber=1 scan=27769	57.0447
34305:4	1	S.MPLPPHPGHPGYINFS[+79.966]YEVLTPL.K		S[+80]	664.826	4	2656.28	2656.27	0	5.3	17	Non	164.71	164.71	73.07	2.43	1032	>sp|P02817|AMELX_BOVIN Amelogenin, X isoform OS=Bos taurus OX=9913 GN=AMELX PE=1 SV=2	1	hf1_10472_ebo_22_1_261219.ScanId;v=1;d1=25371.25371.4	controllerType=0 controllerNumber=1 scan=25371	52.7687
46082:3	1	S.MPLPPHPGHPGYINFS[+79.966]YEVLTPL.K		S[+80]	886.102	3	2656.29	2656.27	0	9.4	17	Non	207.04	207.04	38.69	2.56	1032	>sp|P02817|AMELX_BOVIN Amelogenin, X isoform OS=Bos taurus OX=9913 GN=AMELX PE=1 SV=2	1	hf1_10472_ebo_22_1_261219.ScanId;v=1;d1=34370.34370.3	controllerType=0 controllerNumber=1 scan=34370	73.5565
36920:3	1	S.MPLPPHPGHPGYINFS[+79.966]YEVLTPL.K		S[+80]	886.101	3	2656.29	2656.27	0	8.7	17	Non	256.51	256.51	3.98	3.22	1032	>sp|P02817|AMELX_BOVIN Amelogenin, X isoform OS=Bos taurus OX=9913 GN=AMELX PE=1 SV=2	1	hf1_10472_ebo_22_1_261219.ScanId;v=1;d1=27109.27109.3	controllerType=0 controllerNumber=1 scan=27109	55.8674
35095:3	1	S.MPLPPHPGHPGYINFS[+79.966]YEVLTPL.K		S[+80]	886.092	3	2656.26	2656.27	0	-1.5	17	Non	275.28	275.28	45.37	2.78	1032	>sp|P02817|AMELX_BOVIN Amelogenin, X isoform OS=Bos taurus OX=9913 GN=AMELX PE=1 SV=2	1	hf1_10472_ebo_22_1_261219.ScanId;v=1;d1=25908.25908.3	controllerType=0 controllerNumber=1 scan=25908	53.7276
43354:3	1	S.MPLPPHPGHPGYINFS[+79.966]YEVLTPL.K		S[+80]	886.102	3	2656.29	2656.27	0	8.9	17	Non	277.31	277.31	48.99	3.45	1032	>sp|P02817|AMELX_BOVIN Amelogenin, X isoform OS=Bos taurus OX=9913 GN=AMELX PE=1 SV=2	1	hf1_10472_ebo_22_1_261219.ScanId;v=1;d1=31424.31424.3	controllerType=0 controllerNumber=1 scan=31424	63.7878
35695:3	1	S.MPLPPHPGHPGYINFS[+79.966]YEVLTPL.K		S[+80]	886.1	3	2656.29	2656.27	0	7.4	17	Non	279.4	279.4	45.25	3.99	1032	>sp|P02817|AMELX_BOVIN Amelogenin, X isoform OS=Bos taurus OX=9913 GN=AMELX PE=1 SV=2	1	hf1_10472_ebo_22_1_261219.ScanId;v=1;d1=26307.26307.3	controllerType=0 controllerNumber=1 scan=26307	54.4395
36318:3	1	S.MPLPPHPGHPGYINFS[+79.966]YEVLTPL.K		S[+80]	886.1	3	2656.28	2656.27	0	6.8	17	Non	297.2	297.2	90.62	4.57	1032	>sp|P02817|AMELX_BOVIN Amelogenin, X isoform OS=Bos taurus OX=9913 GN=AMELX PE=1 SV=2	1	hf1_10472_ebo_22_1_261219.ScanId;v=1;d1=26710.26710.3	controllerType=0 controllerNumber=1 scan=26710	55.1562
35387:3	1	S.MPLPPHPGHPGYINFS[+79.966]YEVLTPL.K		S[+80]	886.095	3	2656.27	2656.27	0	1.2	17	Non	321.21	321.21	70.47	3.33	1032	>sp|P02817|AMELX_BOVIN Amelogenin, X isoform OS=Bos taurus OX=9913 GN=AMELX PE=1 SV=2	1	hf1_10472_ebo_22_1_261219.ScanId;v=1;d1=26107.26107.3	controllerType=0 controllerNumber=1 scan=26107	54.0847
33905:2	1	S.MPLPPHPGHPGYINFS[+79.966]YEVLTPL.K		S[+80]	1328.65	2	2656.28	2656.27	0	6.4	17	Non	321.95	321.95	108.14	4.77	1032	>sp|P02817|AMELX_BOVIN Amelogenin, X isoform OS=Bos taurus OX=9913 GN=AMELX PE=1 SV=2	1	hf1_10472_ebo_22_1_261219.ScanId;v=1;d1=25103.25103.2	controllerType=0 controllerNumber=1 scan=25103	52.2855
34492:2	1	S.MPLPPHPGHPGYINFS[+79.966]YEVLTPL.K		S[+80]	1328.65	2	2656.29	2656.27	0	8.6	17	Non	357.07	357.07	129.11	3.96	1032	>sp|P02817|AMELX_BOVIN Amelogenin, X isoform OS=Bos taurus OX=9913 GN=AMELX PE=1 SV=2	1	hf1_10472_ebo_22_1_261219.ScanId;v=1;d1=25494.25494.2	controllerType=0 controllerNumber=1 scan=25494	52.9857
34126:3	1	S.MPLPPHPGHPGYINFS[+79.966]YEVLTPL.K		S[+80]	886.099	3	2656.28	2656.27	0	6	17	Non	374.65	374.65	74.05	5.46	1032	>sp|P02817|AMELX_BOVIN Amelogenin, X isoform OS=Bos taurus OX=9913 GN=AMELX PE=1 SV=2	1	hf1_10472_ebo_22_1_261219.ScanId;v=1;d1=25252.25252.3	controllerType=0 controllerNumber=1 scan=25252	52.556
34423:3	1	S.MPLPPHPGHPGYINFS[+79.966]YEVLTPL.K		S[+80]	886.099	3	2656.28	2656.27	0	5.4	17	Non	398.23	398.23	116.43	5.46	1032	>sp|P02817|AMELX_BOVIN Amelogenin, X isoform OS=Bos taurus OX=9913 GN=AMELX PE=1 SV=2	1	hf1_10472_ebo_22_1_261219.ScanId;v=1;d1=25447.25447.3	controllerType=0 controllerNumber=1 scan=25447	52.9033
34698:3	1	S.MPLPPHPGHPGYINFS[+79.966]YEVLTPL.K		S[+80]	886.098	3	2656.28	2656.27	0	5.2	17	Non	401.63	401.63	97.09	5.46	1032	>sp|P02817|AMELX_BOVIN Amelogenin, X isoform OS=Bos taurus OX=9913 GN=AMELX PE=1 SV=2	1	hf1_10472_ebo_22_1_261219.ScanId;v=1;d1=25636.25636.3	controllerType=0 controllerNumber=1 scan=25636	53.2445
30732:3	1	S.MP[+15.995]LPPHPGHPGYINFSYEVLTPL.K		P[+16]	864.774	3	2592.31	2592.3	0	4.8	17	Non	416.84	385.69	4	5.61	1032	>sp|P02817|AMELX_BOVIN Amelogenin, X isoform OS=Bos taurus OX=9913 GN=AMELX PE=1 SV=2	1	hf1_10472_ebo_22_1_261219.ScanId;v=1;d1=22987.22987.3	controllerType=0 controllerNumber=1 scan=22987	48.5413
31021:3	1	S.MP[+15.995]LPPHPGHPGYINFSYEVLTPL.K		P[+16]	864.774	3	2592.31	2592.3	0	4.9	17	Non	455.91	423.68	4	5.7	1032	>sp|P02817|AMELX_BOVIN Amelogenin, X isoform OS=Bos taurus OX=9913 GN=AMELX PE=1 SV=2	1	hf1_10472_ebo_22_1_261219.ScanId;v=1;d1=23188.23188.3	controllerType=0 controllerNumber=1 scan=23188	48.8947
34189:2	1	S.MPLPPHPGHPGYINFS[+79.966]YEVLTPL.K		S[+80]	1328.65	2	2656.29	2656.27	0	9.1	17	Non	477.64	477.64	193.31	5.4	1032	>sp|P02817|AMELX_BOVIN Amelogenin, X isoform OS=Bos taurus OX=9913 GN=AMELX PE=1 SV=2	1	hf1_10472_ebo_22_1_261219.ScanId;v=1;d1=25294.25294.2	controllerType=0 controllerNumber=1 scan=25294	52.6332
44388:3	1	S.MP[+15.995]LPPHPGHPGYINFS[+79.966]YEVLTPL.K		P[+16], S[+80]	891.43	3	2672.28	2672.26	0	5.3	17	Non	55.97	55.97	4	2.17	1032	>sp|P02817|AMELX_BOVIN Amelogenin, X isoform OS=Bos taurus OX=9913 GN=AMELX PE=1 SV=2	1	hf1_10472_ebo_22_1_261219.ScanId;v=1;d1=32221.32221.3	controllerType=0 controllerNumber=1 scan=32221	65.5893
44278:3	1	S.MP[+15.995]LPPHPGHPGYINFS[+79.966]YEVLTPL.K		P[+16], S[+80]	891.43	3	2672.28	2672.26	0	5.4	17	Non	57.86	57.86	4	2.22	1032	>sp|P02817|AMELX_BOVIN Amelogenin, X isoform OS=Bos taurus OX=9913 GN=AMELX PE=1 SV=2	1	hf1_10472_ebo_22_1_261219.ScanId;v=1;d1=32112.32112.3	controllerType=0 controllerNumber=1 scan=32112	65.253
46092:4	1	S.MP[+15.995]LPPHPGHPGYINFS[+79.966]YEVLTPL.K		P[+16], S[+80]	668.826	4	2672.28	2672.26	0	7.8	17	Non	82.01	82.01	4	1.51	1032	>sp|P02817|AMELX_BOVIN Amelogenin, X isoform OS=Bos taurus OX=9913 GN=AMELX PE=1 SV=2	1	hf1_10472_ebo_22_1_261219.ScanId;v=1;d1=34379.34379.4	controllerType=0 controllerNumber=1 scan=34379	73.57
34047:2	1	S.MP[+15.995]LPPHPGHPGYINFS[+79.966]YEVLTPL.K		P[+16], S[+80]	1336.65	2	2672.29	2672.26	0	9.5	17	Non	91.13	91.13	4	2.12	1032	>sp|P02817|AMELX_BOVIN Amelogenin, X isoform OS=Bos taurus OX=9913 GN=AMELX PE=1 SV=2	1	hf1_10472_ebo_22_1_261219.ScanId;v=1;d1=25197.25197.2	controllerType=0 controllerNumber=1 scan=25197	52.4542
41910:3	1	S.MP[+15.995]LPPHPGHPGYINFS[+79.966]YEVLTPL.K		P[+16], S[+80]	891.431	3	2672.28	2672.26	0	6.4	17	Non	95.67	95.67	2.53	2.12	1032	>sp|P02817|AMELX_BOVIN Amelogenin, X isoform OS=Bos taurus OX=9913 GN=AMELX PE=1 SV=2	1	hf1_10472_ebo_22_1_261219.ScanId;v=1;d1=30415.30415.3	controllerType=0 controllerNumber=1 scan=30415	61.8066
43720:3	1	S.MP[+15.995]LPPHPGHPGYINFS[+79.966]YEVLTPL.K		P[+16], S[+80]	891.431	3	2672.28	2672.26	0	6.7	17	Non	101.85	101.85	2.46	2.12	1032	>sp|P02817|AMELX_BOVIN Amelogenin, X isoform OS=Bos taurus OX=9913 GN=AMELX PE=1 SV=2	1	hf1_10472_ebo_22_1_261219.ScanId;v=1;d1=31669.31669.3	controllerType=0 controllerNumber=1 scan=31669	64.2306
43932:3	1	S.MP[+15.995]LPPHPGHPGYINFS[+79.966]YEVLTPL.K		P[+16], S[+80]	891.431	3	2672.28	2672.26	0	5.8	17	Non	102.45	102.45	4	2.22	1032	>sp|P02817|AMELX_BOVIN Amelogenin, X isoform OS=Bos taurus OX=9913 GN=AMELX PE=1 SV=2	1	hf1_10472_ebo_22_1_261219.ScanId;v=1;d1=31831.31831.3	controllerType=0 controllerNumber=1 scan=31831	64.5667
40501:3	1	S.MP[+15.995]LPPHPGHPGYINFS[+79.966]YEVLTPL.K		P[+16], S[+80]	891.432	3	2672.28	2672.26	0	6.8	17	Non	122.55	122.55	4	2.37	1032	>sp|P02817|AMELX_BOVIN Amelogenin, X isoform OS=Bos taurus OX=9913 GN=AMELX PE=1 SV=2	1	hf1_10472_ebo_22_1_261219.ScanId;v=1;d1=29471.29471.3	controllerType=0 controllerNumber=1 scan=29471	60.0862
44126:3	1	S.MP[+15.995]LPPHPGHPGYINFS[+79.966]YEVLTPL.K		P[+16], S[+80]	891.43	3	2672.27	2672.26	0	4.7	17	Non	126.92	126.92	4	2.36	1032	>sp|P02817|AMELX_BOVIN Amelogenin, X isoform OS=Bos taurus OX=9913 GN=AMELX PE=1 SV=2	1	hf1_10472_ebo_22_1_261219.ScanId;v=1;d1=31983.31983.3	controllerType=0 controllerNumber=1 scan=31983	64.9128
00133:3	1	S.MP[+15.995]LPPHPGHPGYINFS[+79.966]YEVLTPL.K		P[+16], S[+80]	891.427	3	2672.27	2672.26	0	2.1	17	Non	129.73	129.73	4	2.12	1032	>sp|P02817|AMELX_BOVIN Amelogenin, X isoform OS=Bos taurus OX=9913 GN=AMELX PE=1 SV=2	1	hf1_10472_ebo_22_1_261219.ScanId;v=1;d1=143.143.3	controllerType=0 controllerNumber=1 scan=143	0.4282
41371:3	1	S.MP[+15.995]LPPHPGHPGYINFS[+79.966]YEVLTPL.K		P[+16], S[+80]	891.431	3	2672.28	2672.26	0	6.1	17	Non	131.32	131.32	5.8	2.13	1032	>sp|P02817|AMELX_BOVIN Amelogenin, X isoform OS=Bos taurus OX=9913 GN=AMELX PE=1 SV=2	1	hf1_10472_ebo_22_1_261219.ScanId;v=1;d1=30049.30049.3	controllerType=0 controllerNumber=1 scan=30049	61.1243
36898:3	1	S.MP[+15.995]LPPHPGHPGYINFS[+79.966]YEVLTPL.K		P[+16], S[+80]	891.431	3	2672.28	2672.26	0	6.6	17	Non	147.53	147.53	4	2.16	1032	>sp|P02817|AMELX_BOVIN Amelogenin, X isoform OS=Bos taurus OX=9913 GN=AMELX PE=1 SV=2	1	hf1_10472_ebo_22_1_261219.ScanId;v=1;d1=27094.27094.3	controllerType=0 controllerNumber=1 scan=27094	55.8416
42444:3	1	S.MP[+15.995]LPPHPGHPGYINFS[+79.966]YEVLTPL.K		P[+16], S[+80]	891.431	3	2672.28	2672.26	0	6.3	17	Non	153.85	153.85	4	2.37	1032	>sp|P02817|AMELX_BOVIN Amelogenin, X isoform OS=Bos taurus OX=9913 GN=AMELX PE=1 SV=2	1	hf1_10472_ebo_22_1_261219.ScanId;v=1;d1=30782.30782.3	controllerType=0 controllerNumber=1 scan=30782	62.4935
42180:3	1	S.MP[+15.995]LPPHPGHPGYINFS[+79.966]YEVLTPL.K		P[+16], S[+80]	891.43	3	2672.28	2672.26	0	5.5	17	Non	157.14	157.14	4	2.27	1032	>sp|P02817|AMELX_BOVIN Amelogenin, X isoform OS=Bos taurus OX=9913 GN=AMELX PE=1 SV=2	1	hf1_10472_ebo_22_1_261219.ScanId;v=1;d1=30598.30598.3	controllerType=0 controllerNumber=1 scan=30598	62.1449
40803:3	1	S.MP[+15.995]LPPHPGHPGYINFS[+79.966]YEVLTPL.K		P[+16], S[+80]	891.432	3	2672.28	2672.26	0	6.7	17	Non	163.26	163.26	4	2.95	1032	>sp|P02817|AMELX_BOVIN Amelogenin, X isoform OS=Bos taurus OX=9913 GN=AMELX PE=1 SV=2	1	hf1_10472_ebo_22_1_261219.ScanId;v=1;d1=29669.29669.3	controllerType=0 controllerNumber=1 scan=29669	60.4396
39887:3	1	S.MP[+15.995]LPPHPGHPGYINFS[+79.966]YEVLTPL.K		P[+16], S[+80]	891.432	3	2672.28	2672.26	0	7	17	Non	163.77	163.77	4.83	2.42	1032	>sp|P02817|AMELX_BOVIN Amelogenin, X isoform OS=Bos taurus OX=9913 GN=AMELX PE=1 SV=2	1	hf1_10472_ebo_22_1_261219.ScanId;v=1;d1=29064.29064.3	controllerType=0 controllerNumber=1 scan=29064	59.3582
43148:3	1	S.MP[+15.995]LPPHPGHPGYINFS[+79.966]YEVLTPL.K		P[+16], S[+80]	891.431	3	2672.28	2672.26	0	6.2	17	Non	164.63	164.63	5.8	2.3	1032	>sp|P02817|AMELX_BOVIN Amelogenin, X isoform OS=Bos taurus OX=9913 GN=AMELX PE=1 SV=2	1	hf1_10472_ebo_22_1_261219.ScanId;v=1;d1=31289.31289.3	controllerType=0 controllerNumber=1 scan=31289	63.5255
41082:3	1	S.MP[+15.995]LPPHPGHPGYINFS[+79.966]YEVLTPL.K		P[+16], S[+80]	891.431	3	2672.28	2672.26	0	6	17	Non	165.59	165.59	4	2.93	1032	>sp|P02817|AMELX_BOVIN Amelogenin, X isoform OS=Bos taurus OX=9913 GN=AMELX PE=1 SV=2	1	hf1_10472_ebo_22_1_261219.ScanId;v=1;d1=29859.29859.3	controllerType=0 controllerNumber=1 scan=29859	60.7819
37789:3	1	S.MP[+15.995]LPPHPGHPGYINFS[+79.966]YEVLTPL.K		P[+16], S[+80]	891.431	3	2672.28	2672.26	0	6.5	17	Non	165.61	165.61	4	2.42	1032	>sp|P02817|AMELX_BOVIN Amelogenin, X isoform OS=Bos taurus OX=9913 GN=AMELX PE=1 SV=2	1	hf1_10472_ebo_22_1_261219.ScanId;v=1;d1=27681.27681.3	controllerType=0 controllerNumber=1 scan=27681	56.8878
32743:4	1	S.MP[+15.995]LPPHPGHPGYINFS[+79.966]YEVLTPL.K		P[+16], S[+80]	668.825	4	2672.28	2672.26	0	5.7	17	Non	167.82	167.82	4	2.31	1032	>sp|P02817|AMELX_BOVIN Amelogenin, X isoform OS=Bos taurus OX=9913 GN=AMELX PE=1 SV=2	1	hf1_10472_ebo_22_1_261219.ScanId;v=1;d1=24330.24330.4	controllerType=0 controllerNumber=1 scan=24330	50.9087
39978:3	1	S.MPLPPHPGHPGYINFS[+79.966]Y[+15.995]EVLTPL.K		S[+80], Y[+16]	891.432	3	2672.28	2672.26	0	7.4	17	Non	171.72	171.72	10.61	2.95	1032	>sp|P02817|AMELX_BOVIN Amelogenin, X isoform OS=Bos taurus OX=9913 GN=AMELX PE=1 SV=2	1	hf1_10472_ebo_22_1_261219.ScanId;v=1;d1=29125.29125.4	controllerType=0 controllerNumber=1 scan=29125	59.4661
42711:3	1	S.MP[+15.995]LPPHPGHPGYINFS[+79.966]YEVLTPL.K		P[+16], S[+80]	891.431	3	2672.28	2672.26	0	5.8	17	Non	172.59	172.59	4	2.73	1032	>sp|P02817|AMELX_BOVIN Amelogenin, X isoform OS=Bos taurus OX=9913 GN=AMELX PE=1 SV=2	1	hf1_10472_ebo_22_1_261219.ScanId;v=1;d1=30967.30967.3	controllerType=0 controllerNumber=1 scan=30967	62.8448
38088:3	1	S.MP[+15.995]LPPHPGHPGYINFS[+79.966]YEVLTPL.K		P[+16], S[+80]	891.431	3	2672.28	2672.26	0	6.4	17	Non	176.97	176.97	4	2.95	1032	>sp|P02817|AMELX_BOVIN Amelogenin, X isoform OS=Bos taurus OX=9913 GN=AMELX PE=1 SV=2	1	hf1_10472_ebo_22_1_261219.ScanId;v=1;d1=27879.27879.3	controllerType=0 controllerNumber=1 scan=27879	57.2407
32964:3	1	S.MP[+15.995]LPPHPGHPGYINFS[+79.966]YEVLTPL.K		P[+16], S[+80]	891.43	3	2672.28	2672.26	0	4.9	17	Non	178.18	178.18	4	2.3	1032	>sp|P02817|AMELX_BOVIN Amelogenin, X isoform OS=Bos taurus OX=9913 GN=AMELX PE=1 SV=2	1	hf1_10472_ebo_22_1_261219.ScanId;v=1;d1=24478.24478.4	controllerType=0 controllerNumber=1 scan=24478	51.1729
31814:3	1	S.MP[+15.995]LPPHPGHPGYINFS[+79.966]YEVLTPL.K		P[+16], S[+80]	891.433	3	2672.28	2672.26	0	7.9	17	Non	181.34	181.34	4	2.42	1032	>sp|P02817|AMELX_BOVIN Amelogenin, X isoform OS=Bos taurus OX=9913 GN=AMELX PE=1 SV=2	1	hf1_10472_ebo_22_1_261219.ScanId;v=1;d1=23718.23718.3	controllerType=0 controllerNumber=1 scan=23718	49.8312
43431:3	1	S.MP[+15.995]LPPHPGHPGYINFS[+79.966]YEVLTPL.K		P[+16], S[+80]	891.43	3	2672.28	2672.26	0	5.3	17	Non	184.95	184.95	4	2.73	1032	>sp|P02817|AMELX_BOVIN Amelogenin, X isoform OS=Bos taurus OX=9913 GN=AMELX PE=1 SV=2	1	hf1_10472_ebo_22_1_261219.ScanId;v=1;d1=31475.31475.3	controllerType=0 controllerNumber=1 scan=31475	63.8807
38375:3	1	S.MP[+15.995]LPPHPGHPGYINFS[+79.966]YEVLTPL.K		P[+16], S[+80]	891.431	3	2672.28	2672.26	0	6	17	Non	185.54	185.54	5.8	2.73	1032	>sp|P02817|AMELX_BOVIN Amelogenin, X isoform OS=Bos taurus OX=9913 GN=AMELX PE=1 SV=2	1	hf1_10472_ebo_22_1_261219.ScanId;v=1;d1=28070.28070.3	controllerType=0 controllerNumber=1 scan=28070	57.5823
36594:3	1	S.MP[+15.995]LPPHPGHPGYINFS[+79.966]YEVLTPL.K		P[+16], S[+80]	891.432	3	2672.28	2672.26	0	7.7	17	Non	194.11	194.11	5.8	2.95	1032	>sp|P02817|AMELX_BOVIN Amelogenin, X isoform OS=Bos taurus OX=9913 GN=AMELX PE=1 SV=2	1	hf1_10472_ebo_22_1_261219.ScanId;v=1;d1=26895.26895.3	controllerType=0 controllerNumber=1 scan=26895	55.4872
39591:3	1	S.MP[+15.995]LPPHPGHPGYINFS[+79.966]YEVLTPL.K		P[+16], S[+80]	891.432	3	2672.28	2672.26	0	7.3	17	Non	194.72	194.72	4	2.95	1032	>sp|P02817|AMELX_BOVIN Amelogenin, X isoform OS=Bos taurus OX=9913 GN=AMELX PE=1 SV=2	1	hf1_10472_ebo_22_1_261219.ScanId;v=1;d1=28866.28866.3	controllerType=0 controllerNumber=1 scan=28866	59.0044
37499:3	1	S.MP[+15.995]LPPHPGHPGYINFS[+79.966]YEVLTPL.K		P[+16], S[+80]	891.431	3	2672.28	2672.26	0	6.5	17	Non	199.1	199.1	5.8	2.42	1032	>sp|P02817|AMELX_BOVIN Amelogenin, X isoform OS=Bos taurus OX=9913 GN=AMELX PE=1 SV=2	1	hf1_10472_ebo_22_1_261219.ScanId;v=1;d1=27483.27483.3	controllerType=0 controllerNumber=1 scan=27483	56.5356
32435:4	1	S.MP[+15.995]LPPHPGHPGYINFS[+79.966]YEVLTPL.K		P[+16], S[+80]	668.825	4	2672.28	2672.26	0	5.7	17	Non	200.59	200.59	4	2.31	1032	>sp|P02817|AMELX_BOVIN Amelogenin, X isoform OS=Bos taurus OX=9913 GN=AMELX PE=1 SV=2	1	hf1_10472_ebo_22_1_261219.ScanId;v=1;d1=24128.24128.4	controllerType=0 controllerNumber=1 scan=24128	50.5553
42945:3	1	S.MP[+15.995]LPPHPGHPGYINFS[+79.966]YEVLTPL.K		P[+16], S[+80]	891.432	3	2672.28	2672.26	0	6.9	17	Non	205	205	4	3.45	1032	>sp|P02817|AMELX_BOVIN Amelogenin, X isoform OS=Bos taurus OX=9913 GN=AMELX PE=1 SV=2	1	hf1_10472_ebo_22_1_261219.ScanId;v=1;d1=31138.31138.3	controllerType=0 controllerNumber=1 scan=31138	63.184
36310:3	1	S.MP[+15.995]LPPHPGHPGYINFS[+79.966]YEVLTPL.K		P[+16], S[+80]	891.431	3	2672.28	2672.26	0	6	17	Non	207.77	207.77	4	2.98	1032	>sp|P02817|AMELX_BOVIN Amelogenin, X isoform OS=Bos taurus OX=9913 GN=AMELX PE=1 SV=2	1	hf1_10472_ebo_22_1_261219.ScanId;v=1;d1=26705.26705.3	controllerType=0 controllerNumber=1 scan=26705	55.1487
35622:3	1	S.MP[+15.995]LPPHPGHPGYINFS[+79.966]YEVLTPL.K		P[+16], S[+80]	891.432	3	2672.28	2672.26	0	7.2	17	Non	208.69	208.69	4.71	3.22	1032	>sp|P02817|AMELX_BOVIN Amelogenin, X isoform OS=Bos taurus OX=9913 GN=AMELX PE=1 SV=2	1	hf1_10472_ebo_22_1_261219.ScanId;v=1;d1=26262.26262.3	controllerType=0 controllerNumber=1 scan=26262	54.3594
41647:3	1	S.MP[+15.995]LPPHPGHPGYINFS[+79.966]YEVLTPL.K		P[+16], S[+80]	891.433	3	2672.28	2672.26	0	7.9	17	Non	213.44	213.44	5.8	3.45	1032	>sp|P02817|AMELX_BOVIN Amelogenin, X isoform OS=Bos taurus OX=9913 GN=AMELX PE=1 SV=2	1	hf1_10472_ebo_22_1_261219.ScanId;v=1;d1=30237.30237.3	controllerType=0 controllerNumber=1 scan=30237	61.4685
35922:3	1	S.MP[+15.995]LPPHPGHPGYINFS[+79.966]YEVLTPL.K		P[+16], S[+80]	891.431	3	2672.28	2672.26	0	6.3	17	Non	223.05	223.05	4	3.22	1032	>sp|P02817|AMELX_BOVIN Amelogenin, X isoform OS=Bos taurus OX=9913 GN=AMELX PE=1 SV=2	1	hf1_10472_ebo_22_1_261219.ScanId;v=1;d1=26454.26454.3	controllerType=0 controllerNumber=1 scan=26454	54.7026
37204:3	1	S.MP[+15.995]LPPHPGHPGYINFS[+79.966]YEVLTPL.K		P[+16], S[+80]	891.431	3	2672.28	2672.26	0	5.7	17	Non	232.74	232.74	4.19	2.98	1032	>sp|P02817|AMELX_BOVIN Amelogenin, X isoform OS=Bos taurus OX=9913 GN=AMELX PE=1 SV=2	1	hf1_10472_ebo_22_1_261219.ScanId;v=1;d1=27287.27287.3	controllerType=0 controllerNumber=1 scan=27287	56.1871
35332:3	1	S.MP[+15.995]LPPHPGHPGYINFS[+79.966]YEVLTPL.K		P[+16], S[+80]	891.431	3	2672.28	2672.26	0	5.7	17	Non	235.71	235.71	2.42	2.43	1032	>sp|P02817|AMELX_BOVIN Amelogenin, X isoform OS=Bos taurus OX=9913 GN=AMELX PE=1 SV=2	1	hf1_10472_ebo_22_1_261219.ScanId;v=1;d1=26070.26070.3	controllerType=0 controllerNumber=1 scan=26070	54.0174
35048:3	1	S.MP[+15.995]LPPHPGHPGYINFS[+79.966]YEVLTPL.K		P[+16], S[+80]	891.43	3	2672.28	2672.26	0	4.9	17	Non	251.09	251.09	5.8	3.73	1032	>sp|P02817|AMELX_BOVIN Amelogenin, X isoform OS=Bos taurus OX=9913 GN=AMELX PE=1 SV=2	1	hf1_10472_ebo_22_1_261219.ScanId;v=1;d1=25874.25874.3	controllerType=0 controllerNumber=1 scan=25874	53.6683
35696:3	1	S.MPLPPHPGHPGYIN[+0.984]FS[+79.966]YEVLTPL.K		N[+1], S[+80]	886.431	3	2657.28	2657.25	0	9.8	17	Non	253.31	253.31	65.23	3.22	1032	>sp|P02817|AMELX_BOVIN Amelogenin, X isoform OS=Bos taurus OX=9913 GN=AMELX PE=1 SV=2	1	hf1_10472_ebo_22_1_261219.ScanId;v=1;d1=26307.26307.3	controllerType=0 controllerNumber=1 scan=26307	54.4395
34760:3	1	S.MP[+15.995]LPPHPGHPGYINFS[+79.966]YEVLTPL.K		P[+16], S[+80]	891.43	3	2672.27	2672.26	0	4.8	17	Non	262.26	262.26	5.8	3.73	1032	>sp|P02817|AMELX_BOVIN Amelogenin, X isoform OS=Bos taurus OX=9913 GN=AMELX PE=1 SV=2	1	hf1_10472_ebo_22_1_261219.ScanId;v=1;d1=25679.25679.3	controllerType=0 controllerNumber=1 scan=25679	53.3207
34183:3	1	S.MP[+15.995]LPPHPGHPGYINFS[+79.966]YEVLTPL.K		P[+16], S[+80]	891.429	3	2672.27	2672.26	0	4	17	Non	272.28	272.28	5.8	3.32	1032	>sp|P02817|AMELX_BOVIN Amelogenin, X isoform OS=Bos taurus OX=9913 GN=AMELX PE=1 SV=2	1	hf1_10472_ebo_22_1_261219.ScanId;v=1;d1=25289.25289.3	controllerType=0 controllerNumber=1 scan=25289	52.6227
33012:2	1	S.M[+15.995]PLPPHPGHPGYINFS[+79.966]YEVLTPL.K		M[+16], S[+80]	1336.64	2	2672.28	2672.26	0	5.4	17	Non	277.05	277.05	7.09	3.98	1032	>sp|P02817|AMELX_BOVIN Amelogenin, X isoform OS=Bos taurus OX=9913 GN=AMELX PE=1 SV=2	1	hf1_10472_ebo_22_1_261219.ScanId;v=1;d1=24509.24509.2	controllerType=0 controllerNumber=1 scan=24509	51.2274
32132:2	1	S.MP[+15.995]LPPHPGHPGYINFS[+79.966]YEVLTPL.K		P[+16], S[+80]	1336.64	2	2672.27	2672.26	0	2.5	17	Non	282.25	282.25	4	3.88	1032	>sp|P02817|AMELX_BOVIN Amelogenin, X isoform OS=Bos taurus OX=9913 GN=AMELX PE=1 SV=2	1	hf1_10472_ebo_22_1_261219.ScanId;v=1;d1=23925.23925.2	controllerType=0 controllerNumber=1 scan=23925	50.1947
35096:3	1	S.MPLPPHPGHPGYIN[+0.984]FS[+79.966]YEVLTPL.K		N[+1], S[+80]	886.427	3	2657.27	2657.25	0	5.8	17	Non	308.74	308.74	134.2	4.05	1032	>sp|P02817|AMELX_BOVIN Amelogenin, X isoform OS=Bos taurus OX=9913 GN=AMELX PE=1 SV=2	1	hf1_10472_ebo_22_1_261219.ScanId;v=1;d1=25908.25908.3	controllerType=0 controllerNumber=1 scan=25908	53.7276
33010:3	1	S.MP[+15.995]LPPHPGHPGYINFS[+79.966]YEVLTPL.K		P[+16], S[+80]	891.428	3	2672.27	2672.26	0	3.4	17	Non	311.62	311.62	4	3.87	1032	>sp|P02817|AMELX_BOVIN Amelogenin, X isoform OS=Bos taurus OX=9913 GN=AMELX PE=1 SV=2	1	hf1_10472_ebo_22_1_261219.ScanId;v=1;d1=24508.24508.3	controllerType=0 controllerNumber=1 scan=24508	51.2259
33606:3	1	S.MP[+15.995]LPPHPGHPGYINFS[+79.966]YEVLTPL.K		P[+16], S[+80]	891.428	3	2672.27	2672.26	0	2.6	17	Non	316.68	316.68	4	3.87	1032	>sp|P02817|AMELX_BOVIN Amelogenin, X isoform OS=Bos taurus OX=9913 GN=AMELX PE=1 SV=2	1	hf1_10472_ebo_22_1_261219.ScanId;v=1;d1=24900.24900.3	controllerType=0 controllerNumber=1 scan=24900	51.9204
33895:3	1	S.MP[+15.995]LPPHPGHPGYINFS[+79.966]YEVLTPL.K		P[+16], S[+80]	891.429	3	2672.27	2672.26	0	3.5	17	Non	321.1	321.1	5.8	4.05	1032	>sp|P02817|AMELX_BOVIN Amelogenin, X isoform OS=Bos taurus OX=9913 GN=AMELX PE=1 SV=2	1	hf1_10472_ebo_22_1_261219.ScanId;v=1;d1=25097.25097.3	controllerType=0 controllerNumber=1 scan=25097	52.2737
34473:3	1	S.MP[+15.995]LPPHPGHPGYINFS[+79.966]YEVLTPL.K		P[+16], S[+80]	891.43	3	2672.27	2672.26	0	4.6	17	Non	324.84	324.84	5.8	4.48	1032	>sp|P02817|AMELX_BOVIN Amelogenin, X isoform OS=Bos taurus OX=9913 GN=AMELX PE=1 SV=2	1	hf1_10472_ebo_22_1_261219.ScanId;v=1;d1=25480.25480.3	controllerType=0 controllerNumber=1 scan=25480	52.9617
35388:3	1	S.MPLPPHPGHPGYIN[+0.984]FS[+79.966]YEVLTPL.K		N[+1], S[+80]	886.428	3	2657.27	2657.25	0	7.2	17	Non	329.2	329.2	96.62	4.75	1032	>sp|P02817|AMELX_BOVIN Amelogenin, X isoform OS=Bos taurus OX=9913 GN=AMELX PE=1 SV=2	1	hf1_10472_ebo_22_1_261219.ScanId;v=1;d1=26107.26107.3	controllerType=0 controllerNumber=1 scan=26107	54.0847
32413:3	1	S.MP[+15.995]LPPHPGHPGYINFS[+79.966]YEVLTPL.K		P[+16], S[+80]	891.431	3	2672.28	2672.26	0	6	17	Non	343.75	343.75	4	4.49	1032	>sp|P02817|AMELX_BOVIN Amelogenin, X isoform OS=Bos taurus OX=9913 GN=AMELX PE=1 SV=2	1	hf1_10472_ebo_22_1_261219.ScanId;v=1;d1=24113.24113.3	controllerType=0 controllerNumber=1 scan=24113	50.5271
32720:3	1	S.MP[+15.995]LPPHPGHPGYINFS[+79.966]YEVLTPL.K		P[+16], S[+80]	891.43	3	2672.27	2672.26	0	4.8	17	Non	360	360	4	4.61	1032	>sp|P02817|AMELX_BOVIN Amelogenin, X isoform OS=Bos taurus OX=9913 GN=AMELX PE=1 SV=2	1	hf1_10472_ebo_22_1_261219.ScanId;v=1;d1=24314.24314.3	controllerType=0 controllerNumber=1 scan=24314	50.8827
32116:3	1	S.MP[+15.995]LPPHPGHPGYINFS[+79.966]YEVLTPL.K		P[+16], S[+80]	891.43	3	2672.28	2672.26	0	5.6	17	Non	377.5	377.5	4	5.46	1032	>sp|P02817|AMELX_BOVIN Amelogenin, X isoform OS=Bos taurus OX=9913 GN=AMELX PE=1 SV=2	1	hf1_10472_ebo_22_1_261219.ScanId;v=1;d1=23916.23916.3	controllerType=0 controllerNumber=1 scan=23916	50.1812
34699:3	1	S.MPLPPHPGHPGYIN[+0.984]FS[+79.966]YEVLTPL.K		N[+1], S[+80]	886.429	3	2657.27	2657.25	0	8.7	17	Non	386.44	386.44	119.69	4.93	1032	>sp|P02817|AMELX_BOVIN Amelogenin, X isoform OS=Bos taurus OX=9913 GN=AMELX PE=1 SV=2	1	hf1_10472_ebo_22_1_261219.ScanId;v=1;d1=25636.25636.3	controllerType=0 controllerNumber=1 scan=25636	53.2445
32722:2	1	S.M[+15.995]PLPPHPGHPGYINFS[+79.966]YEVLTPL.K		M[+16], S[+80]	1336.64	2	2672.28	2672.26	0	7.1	17	Non	392.6	392.6	7.21	5.72	1032	>sp|P02817|AMELX_BOVIN Amelogenin, X isoform OS=Bos taurus OX=9913 GN=AMELX PE=1 SV=2	1	hf1_10472_ebo_22_1_261219.ScanId;v=1;d1=24316.24316.2	controllerType=0 controllerNumber=1 scan=24316	50.8853
32417:2	1	S.M[+15.995]PLPPHPGHPGYINFS[+79.966]YEVLTPL.K		M[+16], S[+80]	1336.64	2	2672.28	2672.26	0	6.9	17	Non	455.88	455.88	8.32	5.83	1032	>sp|P02817|AMELX_BOVIN Amelogenin, X isoform OS=Bos taurus OX=9913 GN=AMELX PE=1 SV=2	1	hf1_10472_ebo_22_1_261219.ScanId;v=1;d1=24117.24117.2	controllerType=0 controllerNumber=1 scan=24117	50.5359
42878:3	1	S.MPLPPHPGHP[+31.990]GY[+15.995]INF[+31.990]SYEVLTPL.K		F[+32], P[+32], Y[+16]	886.101	3	2656.29	2656.28	0	4.6	17	Non	75.16	75.16	0	2.11	1032	>sp|P02817|AMELX_BOVIN Amelogenin, X isoform OS=Bos taurus OX=9913 GN=AMELX PE=1 SV=2	1	hf1_10472_ebo_22_1_261219.ScanId;v=1;d1=31089.31089.3	controllerType=0 controllerNumber=1 scan=31089	63.0819
42517:3	1	S.MPLPPHPGHP[+31.990]GY[+31.990]INF[+15.995]SYEVLTPL.K		F[+16], P[+32], Y[+32]	886.099	3	2656.28	2656.28	0	2.8	17	Non	122.46	122.46	2	2.17	1032	>sp|P02817|AMELX_BOVIN Amelogenin, X isoform OS=Bos taurus OX=9913 GN=AMELX PE=1 SV=2	1	hf1_10472_ebo_22_1_261219.ScanId;v=1;d1=30834.30834.3	controllerType=0 controllerNumber=1 scan=30834	62.5938
34783:2	1	S.MPLPPHPGHPGYINF[+31.990]SY[+15.995]EVLTP[+31.990]L.K		F[+32], P[+32], Y[+16]	1328.65	2	2656.29	2656.28	0	7.2	17	Non	137.38	137.38	0	2.16	1032	>sp|P02817|AMELX_BOVIN Amelogenin, X isoform OS=Bos taurus OX=9913 GN=AMELX PE=1 SV=2	1	hf1_10472_ebo_22_1_261219.ScanId;v=1;d1=25694.25694.2	controllerType=0 controllerNumber=1 scan=25694	53.3462
43080:3	1	S.MPLPPHPGHP[+31.990]GY[+31.990]INFSY[+15.995]EVLTPL.K		P[+32], Y[+16][+32]	886.1	3	2656.29	2656.28	0	3.9	17	Non	137.87	137.87	0.24	2.17	1032	>sp|P02817|AMELX_BOVIN Amelogenin, X isoform OS=Bos taurus OX=9913 GN=AMELX PE=1 SV=2	1	hf1_10472_ebo_22_1_261219.ScanId;v=1;d1=31241.31241.3	controllerType=0 controllerNumber=1 scan=31241	63.4228
31567:3	1	S.MP[+15.995]LPPHPGH[+15.995]PGYINFS[+79.966]YEVLTPL.K		H[+16], P[+16], S[+80]	896.765	3	2688.28	2688.26	0	8.4	17	Non	157.92	157.92	2	2.11	1032	>sp|P02817|AMELX_BOVIN Amelogenin, X isoform OS=Bos taurus OX=9913 GN=AMELX PE=1 SV=2	1	hf1_10472_ebo_22_1_261219.ScanId;v=1;d1=23557.23557.3	controllerType=0 controllerNumber=1 scan=23557	49.5456
43642:3	1	S.MPLPPHPGHP[+31.990]GY[+15.995]INFSY[+31.990]EVLTPL.K		P[+32], Y[+16][+32]	886.1	3	2656.28	2656.28	0	3.4	17	Non	183.8	183.8	0	2.6	1032	>sp|P02817|AMELX_BOVIN Amelogenin, X isoform OS=Bos taurus OX=9913 GN=AMELX PE=1 SV=2	1	hf1_10472_ebo_22_1_261219.ScanId;v=1;d1=31618.31618.3	controllerType=0 controllerNumber=1 scan=31618	64.1354
37233:3	1	S.MPLPPHPGH[+15.995]P[+31.990]GYINF[+31.990]SYEVLTPL.K		F[+32], H[+16], P[+32]	886.1	3	2656.29	2656.28	0	4.2	17	Non	190.28	190.28	5.21	2.3	1032	>sp|P02817|AMELX_BOVIN Amelogenin, X isoform OS=Bos taurus OX=9913 GN=AMELX PE=1 SV=2	1	hf1_10472_ebo_22_1_261219.ScanId;v=1;d1=27309.27309.3	controllerType=0 controllerNumber=1 scan=27309	56.2264
33675:3	1	S.MP[+15.995]LPPHPGHPGYIN[+0.984]FS[+79.966]YEVLTPL.K		N[+1], P[+16], S[+80]	891.761	3	2673.27	2673.25	0	8.7	17	Non	192.8	141.94	5.8	2.11	1032	>sp|P02817|AMELX_BOVIN Amelogenin, X isoform OS=Bos taurus OX=9913 GN=AMELX PE=1 SV=2	1	hf1_10472_ebo_22_1_261219.ScanId;v=1;d1=24947.24947.4	controllerType=0 controllerNumber=1 scan=24947	52.0052
32418:3	1	S.M[+15.995]PLPPHPGHPGYINF[+31.990]SY[+31.990]EVLTPL.K		F[+32], M[+16], Y[+32]	886.088	3	2656.25	2656.28	0	-9.3	17	Non	232.81	232.81	5.91	2.22	1032	>sp|P02817|AMELX_BOVIN Amelogenin, X isoform OS=Bos taurus OX=9913 GN=AMELX PE=1 SV=2	1	hf1_10472_ebo_22_1_261219.ScanId;v=1;d1=24118.24118.4	controllerType=0 controllerNumber=1 scan=24118	50.5374
33306:2	1	S.M[+15.995]PLPPHPGHPGYIN[+0.984]FS[+79.966]YEVLTPL.K		M[+16], N[+1], S[+80]	1337.14	2	2673.27	2673.25	0	9.9	17	Non	251.96	251.96	6.31	3.23	1032	>sp|P02817|AMELX_BOVIN Amelogenin, X isoform OS=Bos taurus OX=9913 GN=AMELX PE=1 SV=2	1	hf1_10472_ebo_22_1_261219.ScanId;v=1;d1=24702.24702.2	controllerType=0 controllerNumber=1 scan=24702	51.5723
33011:3	1	S.MP[+15.995]LPPHPGHPGYIN[+0.984]FS[+79.966]YEVLTPL.K		N[+1], P[+16], S[+80]	891.762	3	2673.27	2673.25	0	9.1	17	Non	274.06	269	4	3.45	1032	>sp|P02817|AMELX_BOVIN Amelogenin, X isoform OS=Bos taurus OX=9913 GN=AMELX PE=1 SV=2	1	hf1_10472_ebo_22_1_261219.ScanId;v=1;d1=24508.24508.3	controllerType=0 controllerNumber=1 scan=24508	51.2259
33607:3	1	S.MP[+15.995]LPPHPGHPGYIN[+0.984]FS[+79.966]YEVLTPL.K		N[+1], P[+16], S[+80]	891.761	3	2673.27	2673.25	0	8.2	17	Non	281.7	267.6	4	3.36	1032	>sp|P02817|AMELX_BOVIN Amelogenin, X isoform OS=Bos taurus OX=9913 GN=AMELX PE=1 SV=2	1	hf1_10472_ebo_22_1_261219.ScanId;v=1;d1=24900.24900.3	controllerType=0 controllerNumber=1 scan=24900	51.9204
32169:3	1	S.MP[+15.995]LPPHPGHP[+15.995]GYINFS[+79.966]YEVLTPL.K		P[+16]*2, S[+80]	896.761	3	2688.27	2688.26	0	3.9	17	Non	285.13	285.13	5.8	3.63	1032	>sp|P02817|AMELX_BOVIN Amelogenin, X isoform OS=Bos taurus OX=9913 GN=AMELX PE=1 SV=2	1	hf1_10472_ebo_22_1_261219.ScanId;v=1;d1=23950.23950.3	controllerType=0 controllerNumber=1 scan=23950	50.2401
31862:3	1	S.MP[+15.995]LPPHPGHP[+15.995]GYINFS[+79.966]YEVLTPL.K		P[+16]*2, S[+80]	896.763	3	2688.27	2688.26	0	6.3	17	Non	338.62	338.62	5.8	4.75	1032	>sp|P02817|AMELX_BOVIN Amelogenin, X isoform OS=Bos taurus OX=9913 GN=AMELX PE=1 SV=2	1	hf1_10472_ebo_22_1_261219.ScanId;v=1;d1=23751.23751.3	controllerType=0 controllerNumber=1 scan=23751	49.8894
33303:3	1	S.MP[+15.995]LPPHPGHPGYIN[+0.984]FS[+79.966]YEVLTPL.K		N[+1], P[+16], S[+80]	891.76	3	2673.27	2673.25	0	7.4	17	Non	358.98	358.98	4	4.76	1032	>sp|P02817|AMELX_BOVIN Amelogenin, X isoform OS=Bos taurus OX=9913 GN=AMELX PE=1 SV=2	1	hf1_10472_ebo_22_1_261219.ScanId;v=1;d1=24700.24700.3	controllerType=0 controllerNumber=1 scan=24700	51.5692
38969:3	1	S.MP[+15.995]LPPHPGHP[+15.995]GY[+31.990]INF[+31.990]SYEVLTPL.K		F[+32], P[+16]*2, Y[+32]	891.432	3	2672.28	2672.27	0	4	17	Non	162.11	162.11	0	2.18	1032	>sp|P02817|AMELX_BOVIN Amelogenin, X isoform OS=Bos taurus OX=9913 GN=AMELX PE=1 SV=2	1	hf1_10472_ebo_22_1_261219.ScanId;v=1;d1=28458.28458.3	controllerType=0 controllerNumber=1 scan=28458	58.2763
40205:3	1	S.MP[+15.995]LPPHPGHP[+31.990]GY[+15.995]INF[+31.990]SYEVLTPL.K		F[+32], P[+16][+32], Y[+16]	891.431	3	2672.28	2672.27	0	3.6	17	Non	166.59	166.59	2	2.18	1032	>sp|P02817|AMELX_BOVIN Amelogenin, X isoform OS=Bos taurus OX=9913 GN=AMELX PE=1 SV=2	1	hf1_10472_ebo_22_1_261219.ScanId;v=1;d1=29278.29278.3	controllerType=0 controllerNumber=1 scan=29278	59.7399
36012:3	1	S.MPLPPHPGHP[+31.990]GYIN[+0.984]F[+15.995]SY[+31.990]EVLTPL.K		F[+16], N[+1], P[+32], Y[+32]	886.432	3	2657.28	2657.26	0	8.6	17	Non	187.11	187.11	0	2.16	1032	>sp|P02817|AMELX_BOVIN Amelogenin, X isoform OS=Bos taurus OX=9913 GN=AMELX PE=1 SV=2	1	hf1_10472_ebo_22_1_261219.ScanId;v=1;d1=26512.26512.3	controllerType=0 controllerNumber=1 scan=26512	54.8048
40901:3	1	S.MPLPPHPGHPGYINFS[+79.966]YEVLTPLK.W		S[+80]	928.794	3	2784.37	2784.36	0	2.4	17	NRagged	70.6	70.6	8.77	2.16	1032	>sp|P02817|AMELX_BOVIN Amelogenin, X isoform OS=Bos taurus OX=9913 GN=AMELX PE=1 SV=2	1	hf1_10472_ebo_22_1_261219.ScanId;v=1;d1=29736.29736.3	controllerType=0 controllerNumber=1 scan=29736	60.5594
27054:3	1	S.M[+15.995]PLPPHPGHPGYINFSYEVLTPLK.W		M[+16]	907.474	3	2720.41	2720.39	0	6.5	17	NRagged	79.95	79.95	8.01	2.37	1032	>sp|P02817|AMELX_BOVIN Amelogenin, X isoform OS=Bos taurus OX=9913 GN=AMELX PE=1 SV=2	1	hf1_10472_ebo_22_1_261219.ScanId;v=1;d1=20455.20455.4	controllerType=0 controllerNumber=1 scan=20455	44.1161
32784:3	1	S.MPLPPHPGHPGYINFS[+79.966]YEVLTPLK.W		S[+80]	928.792	3	2784.36	2784.36	0	0	17	NRagged	112.61	112.61	37.77	2.11	1032	>sp|P02817|AMELX_BOVIN Amelogenin, X isoform OS=Bos taurus OX=9913 GN=AMELX PE=1 SV=2	1	hf1_10472_ebo_22_1_261219.ScanId;v=1;d1=24356.24356.3	controllerType=0 controllerNumber=1 scan=24356	50.9536
43754:3	1	S.MPLPPHPGHPGYINFS[+79.966]YEVLTPLK.W		S[+80]	928.801	3	2784.39	2784.36	0	9.2	17	NRagged	116.75	116.75	10.53	2.15	1032	>sp|P02817|AMELX_BOVIN Amelogenin, X isoform OS=Bos taurus OX=9913 GN=AMELX PE=1 SV=2	1	hf1_10472_ebo_22_1_261219.ScanId;v=1;d1=31694.31694.3	controllerType=0 controllerNumber=1 scan=31694	64.2773
41762:3	1	S.MPLPPHPGHPGYINFS[+79.966]YEVLTPLK.W		S[+80]	928.8	3	2784.39	2784.36	0	8.9	17	NRagged	124.31	124.31	54.1	2.56	1032	>sp|P02817|AMELX_BOVIN Amelogenin, X isoform OS=Bos taurus OX=9913 GN=AMELX PE=1 SV=2	1	hf1_10472_ebo_22_1_261219.ScanId;v=1;d1=30314.30314.4	controllerType=0 controllerNumber=1 scan=30314	61.6116
28770:3	1	S.M[+15.995]PLPPHPGHPGYINFSYEVLTPLK.W		M[+16]	907.462	3	2720.37	2720.39	0	-7.1	17	NRagged	144.48	144.48	6.5	1.52	1032	>sp|P02817|AMELX_BOVIN Amelogenin, X isoform OS=Bos taurus OX=9913 GN=AMELX PE=1 SV=2	1	hf1_10472_ebo_22_1_261219.ScanId;v=1;d1=21644.21644.5	controllerType=0 controllerNumber=1 scan=21644	46.1871
39766:3	1	S.MPLPPHPGHPGYINFS[+79.966]YEVLTPLK.W		S[+80]	928.797	3	2784.38	2784.36	0	5.4	17	NRagged	152.44	152.44	14.18	3.19	1032	>sp|P02817|AMELX_BOVIN Amelogenin, X isoform OS=Bos taurus OX=9913 GN=AMELX PE=1 SV=2	1	hf1_10472_ebo_22_1_261219.ScanId;v=1;d1=28983.28983.3	controllerType=0 controllerNumber=1 scan=28983	59.2116
38553:3	1	S.MPLPPHPGHPGYINFS[+79.966]YEVLTPLK.W		S[+80]	928.799	3	2784.38	2784.36	0	7.5	17	NRagged	152.73	152.73	70.39	3.44	1032	>sp|P02817|AMELX_BOVIN Amelogenin, X isoform OS=Bos taurus OX=9913 GN=AMELX PE=1 SV=2	1	hf1_10472_ebo_22_1_261219.ScanId;v=1;d1=28186.28186.3	controllerType=0 controllerNumber=1 scan=28186	57.7903
34684:3	1	S.MPLPPHPGHPGYINFS[+79.966]YEVLTPLK.W		S[+80]	928.792	3	2784.36	2784.36	0	-0.4	17	NRagged	154.02	154.02	14.4	2.14	1032	>sp|P02817|AMELX_BOVIN Amelogenin, X isoform OS=Bos taurus OX=9913 GN=AMELX PE=1 SV=2	1	hf1_10472_ebo_22_1_261219.ScanId;v=1;d1=25624.25624.3	controllerType=0 controllerNumber=1 scan=25624	53.2215
42604:3	1	S.MPLPPHPGHPGYINFS[+79.966]YEVLTPLK.W		S[+80]	928.796	3	2784.37	2784.36	0	4.6	17	NRagged	159.49	159.49	53.19	2.43	1032	>sp|P02817|AMELX_BOVIN Amelogenin, X isoform OS=Bos taurus OX=9913 GN=AMELX PE=1 SV=2	1	hf1_10472_ebo_22_1_261219.ScanId;v=1;d1=30893.30893.4	controllerType=0 controllerNumber=1 scan=30893	62.7049
42964:3	1	S.MPLPPHPGHPGYINFS[+79.966]YEVLTPLK.W		S[+80]	928.799	3	2784.38	2784.36	0	7	17	NRagged	186.88	186.88	41.85	4.42	1032	>sp|P02817|AMELX_BOVIN Amelogenin, X isoform OS=Bos taurus OX=9913 GN=AMELX PE=1 SV=2	1	hf1_10472_ebo_22_1_261219.ScanId;v=1;d1=31153.31153.3	controllerType=0 controllerNumber=1 scan=31153	63.2172
36751:3	1	S.MPLPPHPGHPGYINFS[+79.966]YEVLTPLK.W		S[+80]	928.799	3	2784.38	2784.36	0	6.9	17	NRagged	189.77	189.77	66.94	4.01	1032	>sp|P02817|AMELX_BOVIN Amelogenin, X isoform OS=Bos taurus OX=9913 GN=AMELX PE=1 SV=2	1	hf1_10472_ebo_22_1_261219.ScanId;v=1;d1=26998.26998.3	controllerType=0 controllerNumber=1 scan=26998	55.6694
39164:3	1	S.MPLPPHPGHPGYINFS[+79.966]YEVLTPLK.W		S[+80]	928.796	3	2784.37	2784.36	0	4	17	NRagged	192.55	192.55	98.98	3.57	1032	>sp|P02817|AMELX_BOVIN Amelogenin, X isoform OS=Bos taurus OX=9913 GN=AMELX PE=1 SV=2	1	hf1_10472_ebo_22_1_261219.ScanId;v=1;d1=28588.28588.3	controllerType=0 controllerNumber=1 scan=28588	58.506
28161:4	1	S.MPLPPHPGHPGYINFS[+79.966]YEVLTPLK.W		S[+80]	696.841	4	2784.34	2784.36	0	-7.6	17	NRagged	192.68	192.68	192.68	2.43	1032	>sp|P02817|AMELX_BOVIN Amelogenin, X isoform OS=Bos taurus OX=9913 GN=AMELX PE=1 SV=2	1	hf1_10472_ebo_22_1_261219.ScanId;v=1;d1=21223.21223.4	controllerType=0 controllerNumber=1 scan=21223	45.4457
42277:3	1	S.MPLPPHPGHPGYINFS[+79.966]YEVLTPLK.W		S[+80]	928.798	3	2784.38	2784.36	0	6	17	NRagged	204.41	204.41	143.74	4.68	1032	>sp|P02817|AMELX_BOVIN Amelogenin, X isoform OS=Bos taurus OX=9913 GN=AMELX PE=1 SV=2	1	hf1_10472_ebo_22_1_261219.ScanId;v=1;d1=30663.30663.3	controllerType=0 controllerNumber=1 scan=30663	62.2649
34984:3	1	S.MPLPPHPGHPGYINFS[+79.966]YEVLTPLK.W		S[+80]	928.794	3	2784.37	2784.36	0	2.5	17	NRagged	209.3	209.3	5.58	3.62	1032	>sp|P02817|AMELX_BOVIN Amelogenin, X isoform OS=Bos taurus OX=9913 GN=AMELX PE=1 SV=2	1	hf1_10472_ebo_22_1_261219.ScanId;v=1;d1=25833.25833.3	controllerType=0 controllerNumber=1 scan=25833	53.5951
33644:3	1	S.MPLPPHPGHPGYINFS[+79.966]YEVLTPLK.W		S[+80]	928.794	3	2784.37	2784.36	0	1.8	17	NRagged	211.27	211.27	17.88	2.56	1032	>sp|P02817|AMELX_BOVIN Amelogenin, X isoform OS=Bos taurus OX=9913 GN=AMELX PE=1 SV=2	1	hf1_10472_ebo_22_1_261219.ScanId;v=1;d1=24927.24927.3	controllerType=0 controllerNumber=1 scan=24927	51.9694
23027:4	1	S.MP[+15.995]LPPHPGHPGYINFSYEVLTPLK.W		P[+16]	680.857	4	2720.41	2720.39	0	6	17	NRagged	214.52	214.52	5.8	4.29	1032	>sp|P02817|AMELX_BOVIN Amelogenin, X isoform OS=Bos taurus OX=9913 GN=AMELX PE=1 SV=2	1	hf1_10472_ebo_22_1_261219.ScanId;v=1;d1=17719.17719.4	controllerType=0 controllerNumber=1 scan=17719	39.3581
42024:3	1	S.MPLPPHPGHPGYINFS[+79.966]YEVLTPLK.W		S[+80]	928.8	3	2784.38	2784.36	0	8	17	NRagged	215.04	215.04	54.71	4.31	1032	>sp|P02817|AMELX_BOVIN Amelogenin, X isoform OS=Bos taurus OX=9913 GN=AMELX PE=1 SV=2	1	hf1_10472_ebo_22_1_261219.ScanId;v=1;d1=30494.30494.4	controllerType=0 controllerNumber=1 scan=30494	61.954
42724:3	1	S.MPLPPHPGHPGYINFS[+79.966]YEVLTPLK.W		S[+80]	928.797	3	2784.38	2784.36	0	5.2	17	NRagged	241.82	241.82	118.37	5.26	1032	>sp|P02817|AMELX_BOVIN Amelogenin, X isoform OS=Bos taurus OX=9913 GN=AMELX PE=1 SV=2	1	hf1_10472_ebo_22_1_261219.ScanId;v=1;d1=30977.30977.3	controllerType=0 controllerNumber=1 scan=30977	62.863
27886:4	1	S.MPLPPHPGHPGYINFS[+79.966]YEVLTPLK.W		S[+80]	696.843	4	2784.35	2784.36	0	-4.5	17	NRagged	252.49	252.49	57.03	3.62	1032	>sp|P02817|AMELX_BOVIN Amelogenin, X isoform OS=Bos taurus OX=9913 GN=AMELX PE=1 SV=2	1	hf1_10472_ebo_22_1_261219.ScanId;v=1;d1=21024.21024.4	controllerType=0 controllerNumber=1 scan=21024	45.0992
27840:3	1	S.MPLPPHPGHPGYINFS[+79.966]YEVLTPLK.W		S[+80]	928.792	3	2784.36	2784.36	0	0	17	NRagged	272.04	272.04	95.91	4.07	1032	>sp|P02817|AMELX_BOVIN Amelogenin, X isoform OS=Bos taurus OX=9913 GN=AMELX PE=1 SV=2	1	hf1_10472_ebo_22_1_261219.ScanId;v=1;d1=20992.20992.3	controllerType=0 controllerNumber=1 scan=20992	45.0427
43466:3	1	S.MPLPPHPGHPGYINFS[+79.966]YEVLTPLK.W		S[+80]	928.798	3	2784.38	2784.36	0	6.8	17	NRagged	279.99	279.99	89.91	5.38	1032	>sp|P02817|AMELX_BOVIN Amelogenin, X isoform OS=Bos taurus OX=9913 GN=AMELX PE=1 SV=2	1	hf1_10472_ebo_22_1_261219.ScanId;v=1;d1=31499.31499.3	controllerType=0 controllerNumber=1 scan=31499	63.9231
42355:3	1	S.MPLPPHPGHPGYINFS[+79.966]YEVLTPLK.W		S[+80]	928.799	3	2784.38	2784.36	0	7	17	NRagged	295.6	295.6	159.44	5.69	1032	>sp|P02817|AMELX_BOVIN Amelogenin, X isoform OS=Bos taurus OX=9913 GN=AMELX PE=1 SV=2	1	hf1_10472_ebo_22_1_261219.ScanId;v=1;d1=30713.30713.4	controllerType=0 controllerNumber=1 scan=30713	62.3558
35585:3	1	S.MPLPPHPGHPGYINFS[+79.966]YEVLTPLK.W		S[+80]	928.798	3	2784.38	2784.36	0	6.6	17	NRagged	299.31	299.31	82.12	5.69	1032	>sp|P02817|AMELX_BOVIN Amelogenin, X isoform OS=Bos taurus OX=9913 GN=AMELX PE=1 SV=2	1	hf1_10472_ebo_22_1_261219.ScanId;v=1;d1=26236.26236.3	controllerType=0 controllerNumber=1 scan=26236	54.3113
32286:4	1	S.MPLPPHPGHPGYINFS[+79.966]YEVLTPLK.W		S[+80]	696.848	4	2784.37	2784.36	0	2.8	17	NRagged	309.1	309.1	150.07	4.99	1032	>sp|P02817|AMELX_BOVIN Amelogenin, X isoform OS=Bos taurus OX=9913 GN=AMELX PE=1 SV=2	1	hf1_10472_ebo_22_1_261219.ScanId;v=1;d1=24032.24032.6	controllerType=0 controllerNumber=1 scan=24032	50.3836
31385:4	1	S.MPLPPHPGHPGYINFS[+79.966]YEVLTPLK.W		S[+80]	696.847	4	2784.37	2784.36	0	2.1	17	NRagged	336.1	336.1	123.16	4.69	1032	>sp|P02817|AMELX_BOVIN Amelogenin, X isoform OS=Bos taurus OX=9913 GN=AMELX PE=1 SV=2	1	hf1_10472_ebo_22_1_261219.ScanId;v=1;d1=23429.23429.4	controllerType=0 controllerNumber=1 scan=23429	49.3206
43175:3	1	S.MPLPPHPGHPGYINFS[+79.966]YEVLTPLK.W		S[+80]	928.797	3	2784.38	2784.36	0	5.6	17	NRagged	337.74	337.74	157.48	5.99	1032	>sp|P02817|AMELX_BOVIN Amelogenin, X isoform OS=Bos taurus OX=9913 GN=AMELX PE=1 SV=2	1	hf1_10472_ebo_22_1_261219.ScanId;v=1;d1=31307.31307.3	controllerType=0 controllerNumber=1 scan=31307	63.5628
28783:4	1	S.MP[+15.995]LPPHPGHPGYINFSYEVLTPLK.W		P[+16]	680.856	4	2720.4	2720.39	0	4.7	17	NRagged	384	384	4	6.95	1032	>sp|P02817|AMELX_BOVIN Amelogenin, X isoform OS=Bos taurus OX=9913 GN=AMELX PE=1 SV=2	1	hf1_10472_ebo_22_1_261219.ScanId;v=1;d1=21652.21652.4	controllerType=0 controllerNumber=1 scan=21652	46.2019
28950:3	1	S.MPLPPHPGHPGYINFS[+79.966]YEVLTPLK.W		S[+80]	928.798	3	2784.38	2784.36	0	6	17	NRagged	402.4	402.4	118.23	6.59	1032	>sp|P02817|AMELX_BOVIN Amelogenin, X isoform OS=Bos taurus OX=9913 GN=AMELX PE=1 SV=2	1	hf1_10472_ebo_22_1_261219.ScanId;v=1;d1=21767.21767.3	controllerType=0 controllerNumber=1 scan=21767	46.402
33271:3	1	S.MPLPPHPGHPGYINFS[+79.966]YEVLTPLK.W		S[+80]	928.793	3	2784.36	2784.36	0	1	17	NRagged	405.8	405.8	85.11	5.66	1032	>sp|P02817|AMELX_BOVIN Amelogenin, X isoform OS=Bos taurus OX=9913 GN=AMELX PE=1 SV=2	1	hf1_10472_ebo_22_1_261219.ScanId;v=1;d1=24682.24682.3	controllerType=0 controllerNumber=1 scan=24682	51.5365
28486:4	1	S.MP[+15.995]LPPHPGHPGYINFSYEVLTPLK.W		P[+16]	680.859	4	2720.41	2720.39	0	8	17	NRagged	410.79	410.79	5.8	7.87	1032	>sp|P02817|AMELX_BOVIN Amelogenin, X isoform OS=Bos taurus OX=9913 GN=AMELX PE=1 SV=2	1	hf1_10472_ebo_22_1_261219.ScanId;v=1;d1=21449.21449.4	controllerType=0 controllerNumber=1 scan=21449	45.8482
46118:4	1	S.MP[+15.995]LPPHPGHPGYINFSYEVLTPLK.W		P[+16]	680.86	4	2720.42	2720.39	0	9.6	17	NRagged	421.73	421.73	4	7.07	1032	>sp|P02817|AMELX_BOVIN Amelogenin, X isoform OS=Bos taurus OX=9913 GN=AMELX PE=1 SV=2	1	hf1_10472_ebo_22_1_261219.ScanId;v=1;d1=34401.34401.4	controllerType=0 controllerNumber=1 scan=34401	73.6088
31873:3	1	S.MPLPPHPGHPGYINFS[+79.966]YEVLTPLK.W		S[+80]	928.799	3	2784.38	2784.36	0	7.5	17	NRagged	518.3	518.3	191.76	7.97	1032	>sp|P02817|AMELX_BOVIN Amelogenin, X isoform OS=Bos taurus OX=9913 GN=AMELX PE=1 SV=2	1	hf1_10472_ebo_22_1_261219.ScanId;v=1;d1=23758.23758.3	controllerType=0 controllerNumber=1 scan=23758	49.9
27803:4	1	S.MP[+15.995]LPPHPGHPGYINFSYEVLTPLK.W		P[+16]	680.854	4	2720.4	2720.39	0	1.7	17	NRagged	543.05	525.89	5.8	6.89	1032	>sp|P02817|AMELX_BOVIN Amelogenin, X isoform OS=Bos taurus OX=9913 GN=AMELX PE=1 SV=2	1	hf1_10472_ebo_22_1_261219.ScanId;v=1;d1=20966.20966.4	controllerType=0 controllerNumber=1 scan=20966	44.9991
26763:3	1	S.M[+15.995]PLPPHPGHPGYINFSYEVLTPLK.W		M[+16]	907.474	3	2720.41	2720.39	0	6.3	17	NRagged	581.57	581.57	14.6	8.82	1032	>sp|P02817|AMELX_BOVIN Amelogenin, X isoform OS=Bos taurus OX=9913 GN=AMELX PE=1 SV=2	1	hf1_10472_ebo_22_1_261219.ScanId;v=1;d1=20259.20259.4	controllerType=0 controllerNumber=1 scan=20259	43.7741
27193:4	1	S.MP[+15.995]LPPHPGHPGYINFSYEVLTPLK.W		P[+16]	680.857	4	2720.41	2720.39	0	5.4	17	NRagged	620.78	620.78	5.8	9.55	1032	>sp|P02817|AMELX_BOVIN Amelogenin, X isoform OS=Bos taurus OX=9913 GN=AMELX PE=1 SV=2	1	hf1_10472_ebo_22_1_261219.ScanId;v=1;d1=20556.20556.4	controllerType=0 controllerNumber=1 scan=20556	44.2883
26605:4	1	S.MP[+15.995]LPPHPGHPGYINFSYEVLTPLK.W		P[+16]	680.857	4	2720.41	2720.39	0	5.4	17	NRagged	623.65	623.65	4	9.55	1032	>sp|P02817|AMELX_BOVIN Amelogenin, X isoform OS=Bos taurus OX=9913 GN=AMELX PE=1 SV=2	1	hf1_10472_ebo_22_1_261219.ScanId;v=1;d1=20153.20153.4	controllerType=0 controllerNumber=1 scan=20153	43.5872
30067:2	1	S.MPLPPHPGHPGYINFS[+79.966]YEVLTPLK.W		S[+80]	1392.69	2	2784.38	2784.36	0	5.6	17	NRagged	647.53	647.53	238.71	8	1032	>sp|P02817|AMELX_BOVIN Amelogenin, X isoform OS=Bos taurus OX=9913 GN=AMELX PE=1 SV=2	1	hf1_10472_ebo_22_1_261219.ScanId;v=1;d1=22525.22525.2	controllerType=0 controllerNumber=1 scan=22525	47.7283
26902:4	1	S.MP[+15.995]LPPHPGHPGYINFSYEVLTPLK.W		P[+16]	680.857	4	2720.41	2720.39	0	5.6	17	NRagged	673.03	673.03	4	10.55	1032	>sp|P02817|AMELX_BOVIN Amelogenin, X isoform OS=Bos taurus OX=9913 GN=AMELX PE=1 SV=2	1	hf1_10472_ebo_22_1_261219.ScanId;v=1;d1=20356.20356.4	controllerType=0 controllerNumber=1 scan=20356	43.9423
30488:4	1	S.MPLPPHPGHPGYINFS[+79.966]YEVLTPLK.W		S[+80]	696.847	4	2784.37	2784.36	0	1.6	17	NRagged	713.24	713.24	359.61	10.62	1032	>sp|P02817|AMELX_BOVIN Amelogenin, X isoform OS=Bos taurus OX=9913 GN=AMELX PE=1 SV=2	1	hf1_10472_ebo_22_1_261219.ScanId;v=1;d1=22816.22816.4	controllerType=0 controllerNumber=1 scan=22816	48.2383
29763:2	1	S.MPLPPHPGHPGYINFS[+79.966]YEVLTPLK.W		S[+80]	1392.69	2	2784.38	2784.36	0	6.8	17	NRagged	739.94	739.94	252.88	10.92	1032	>sp|P02817|AMELX_BOVIN Amelogenin, X isoform OS=Bos taurus OX=9913 GN=AMELX PE=1 SV=2	1	hf1_10472_ebo_22_1_261219.ScanId;v=1;d1=22317.22317.2	controllerType=0 controllerNumber=1 scan=22317	47.3629
29621:4	1	S.MPLPPHPGHPGYINFS[+79.966]YEVLTPLK.W		S[+80]	696.851	4	2784.38	2784.36	0	7.1	17	NRagged	760.56	760.56	350.82	12.82	1032	>sp|P02817|AMELX_BOVIN Amelogenin, X isoform OS=Bos taurus OX=9913 GN=AMELX PE=1 SV=2	1	hf1_10472_ebo_22_1_261219.ScanId;v=1;d1=22223.22223.4	controllerType=0 controllerNumber=1 scan=22223	47.1998
31414:3	1	S.MPLPPHPGHPGYINFS[+79.966]YEVLTPLK.W		S[+80]	928.795	3	2784.37	2784.36	0	2.9	17	NRagged	768.57	768.57	319.86	12.12	1032	>sp|P02817|AMELX_BOVIN Amelogenin, X isoform OS=Bos taurus OX=9913 GN=AMELX PE=1 SV=2	1	hf1_10472_ebo_22_1_261219.ScanId;v=1;d1=23451.23451.3	controllerType=0 controllerNumber=1 scan=23451	49.3596
29914:4	1	S.MPLPPHPGHPGYINFS[+79.966]YEVLTPLK.W		S[+80]	696.851	4	2784.38	2784.36	0	7.1	17	NRagged	779.49	779.49	413.96	12.82	1032	>sp|P02817|AMELX_BOVIN Amelogenin, X isoform OS=Bos taurus OX=9913 GN=AMELX PE=1 SV=2	1	hf1_10472_ebo_22_1_261219.ScanId;v=1;d1=22421.22421.4	controllerType=0 controllerNumber=1 scan=22421	47.5474
46087:4	1	S.MPLPPHPGHPGYINFS[+79.966]YEVLTPLK.W		S[+80]	696.851	4	2784.38	2784.36	0	7.9	17	NRagged	783.54	783.54	424.98	12.82	1032	>sp|P02817|AMELX_BOVIN Amelogenin, X isoform OS=Bos taurus OX=9913 GN=AMELX PE=1 SV=2	1	hf1_10472_ebo_22_1_261219.ScanId;v=1;d1=34374.34374.4	controllerType=0 controllerNumber=1 scan=34374	73.5625
30199:4	1	S.MPLPPHPGHPGYINFS[+79.966]YEVLTPLK.W		S[+80]	696.85	4	2784.38	2784.36	0	5.6	17	NRagged	810.21	810.21	434.02	13.55	1032	>sp|P02817|AMELX_BOVIN Amelogenin, X isoform OS=Bos taurus OX=9913 GN=AMELX PE=1 SV=2	1	hf1_10472_ebo_22_1_261219.ScanId;v=1;d1=22619.22619.4	controllerType=0 controllerNumber=1 scan=22619	47.8943
46089:3	1	S.MPLPPHPGHPGYINFS[+79.966]YEVLTPLK.W		S[+80]	928.799	3	2784.38	2784.36	0	7.9	17	NRagged	1084.98	1084.98	494.86	18.82	1032	>sp|P02817|AMELX_BOVIN Amelogenin, X isoform OS=Bos taurus OX=9913 GN=AMELX PE=1 SV=2	1	hf1_10472_ebo_22_1_261219.ScanId;v=1;d1=34376.34376.3	controllerType=0 controllerNumber=1 scan=34376	73.5655
30269:3	1	S.MPLPPHPGHPGYINFS[+79.966]YEVLTPLK.W		S[+80]	928.797	3	2784.38	2784.36	0	5	17	NRagged	1143.42	1143.42	497.65	19.55	1032	>sp|P02817|AMELX_BOVIN Amelogenin, X isoform OS=Bos taurus OX=9913 GN=AMELX PE=1 SV=2	1	hf1_10472_ebo_22_1_261219.ScanId;v=1;d1=22663.22663.3	controllerType=0 controllerNumber=1 scan=22663	47.9711
29687:3	1	S.MPLPPHPGHPGYINFS[+79.966]YEVLTPLK.W		S[+80]	928.798	3	2784.38	2784.36	0	6	17	NRagged	1206.57	1206.57	553.73	21.55	1032	>sp|P02817|AMELX_BOVIN Amelogenin, X isoform OS=Bos taurus OX=9913 GN=AMELX PE=1 SV=2	1	hf1_10472_ebo_22_1_261219.ScanId;v=1;d1=22267.22267.3	controllerType=0 controllerNumber=1 scan=22267	47.2763
29977:3	1	S.MPLPPHPGHPGYINFS[+79.966]YEVLTPLK.W		S[+80]	928.798	3	2784.38	2784.36	0	6.3	17	NRagged	1217.82	1217.82	570.77	21.82	1032	>sp|P02817|AMELX_BOVIN Amelogenin, X isoform OS=Bos taurus OX=9913 GN=AMELX PE=1 SV=2	1	hf1_10472_ebo_22_1_261219.ScanId;v=1;d1=22465.22465.3	controllerType=0 controllerNumber=1 scan=22465	47.6243
02388:3	1	S.MP[+15.995]LPPHPGHPGYINFS[+79.966]YEVLTPLK.W		P[+16], S[+80]	934.13	3	2800.38	2800.36	0	6.9	17	NRagged	20.56	20.56	4	2.68	1032	>sp|P02817|AMELX_BOVIN Amelogenin, X isoform OS=Bos taurus OX=9913 GN=AMELX PE=1 SV=2	1	hf1_10472_ebo_22_1_261219.ScanId;v=1;d1=3673.3673.3	controllerType=0 controllerNumber=1 scan=3673	14.9729
46279:4	1	S.MP[+15.995]LPPHPGHPGYINFS[+79.966]YEVLTPLK.W		P[+16], S[+80]	700.85	4	2800.38	2800.36	0	7.1	17	NRagged	45.97	45.97	4	2.86	1032	>sp|P02817|AMELX_BOVIN Amelogenin, X isoform OS=Bos taurus OX=9913 GN=AMELX PE=1 SV=2	1	hf1_10472_ebo_22_1_261219.ScanId;v=1;d1=34573.34573.4	controllerType=0 controllerNumber=1 scan=34573	74.2689
36506:4	1	S.MP[+15.995]LPPHPGHPGYINFS[+79.966]YEVLTPLK.W		P[+16], S[+80]	700.849	4	2800.37	2800.36	0	6.1	17	NRagged	47.87	47.87	4	2.26	1032	>sp|P02817|AMELX_BOVIN Amelogenin, X isoform OS=Bos taurus OX=9913 GN=AMELX PE=1 SV=2	1	hf1_10472_ebo_22_1_261219.ScanId;v=1;d1=26834.26834.4	controllerType=0 controllerNumber=1 scan=26834	55.375
45029:3	1	S.MP[+15.995]LPPHPGHPGYINFS[+79.966]YEVLTPLK.W		P[+16], S[+80]	934.127	3	2800.37	2800.36	0	3.7	17	NRagged	76.53	76.53	4	2.64	1032	>sp|P02817|AMELX_BOVIN Amelogenin, X isoform OS=Bos taurus OX=9913 GN=AMELX PE=1 SV=2	1	hf1_10472_ebo_22_1_261219.ScanId;v=1;d1=32912.32912.3	controllerType=0 controllerNumber=1 scan=32912	67.876
01900:3	1	S.MP[+15.995]LPPHPGHPGYINFS[+79.966]YEVLTPLK.W		P[+16], S[+80]	934.126	3	2800.36	2800.36	0	2	17	NRagged	77.01	77.01	4	2.29	1032	>sp|P02817|AMELX_BOVIN Amelogenin, X isoform OS=Bos taurus OX=9913 GN=AMELX PE=1 SV=2	1	hf1_10472_ebo_22_1_261219.ScanId;v=1;d1=3342.3342.3	controllerType=0 controllerNumber=1 scan=3342	14.4094
44797:3	1	S.MP[+15.995]LPPHPGHPGYINFS[+79.966]YEVLTPLK.W		P[+16], S[+80]	934.127	3	2800.37	2800.36	0	3.5	17	NRagged	87.63	87.63	4	3.39	1032	>sp|P02817|AMELX_BOVIN Amelogenin, X isoform OS=Bos taurus OX=9913 GN=AMELX PE=1 SV=2	1	hf1_10472_ebo_22_1_261219.ScanId;v=1;d1=32626.32626.3	controllerType=0 controllerNumber=1 scan=32626	66.8583
44973:3	1	S.MP[+15.995]LPPHPGHPGYINFS[+79.966]YEVLTPLK.W		P[+16], S[+80]	934.129	3	2800.37	2800.36	0	6	17	NRagged	91.09	91.09	4	3.81	1032	>sp|P02817|AMELX_BOVIN Amelogenin, X isoform OS=Bos taurus OX=9913 GN=AMELX PE=1 SV=2	1	hf1_10472_ebo_22_1_261219.ScanId;v=1;d1=32829.32829.3	controllerType=0 controllerNumber=1 scan=32829	67.5372
38124:4	1	S.MP[+15.995]LPPHPGHPGYINFS[+79.966]YEVLTPLK.W		P[+16], S[+80]	700.849	4	2800.38	2800.36	0	6.5	17	NRagged	101.97	101.97	5.8	2.36	1032	>sp|P02817|AMELX_BOVIN Amelogenin, X isoform OS=Bos taurus OX=9913 GN=AMELX PE=1 SV=2	1	hf1_10472_ebo_22_1_261219.ScanId;v=1;d1=27902.27902.4	controllerType=0 controllerNumber=1 scan=27902	57.2815
01460:4	1	S.MP[+15.995]LPPHPGHPGYINFS[+79.966]YEVLTPLK.W		P[+16], S[+80]	700.849	4	2800.37	2800.36	0	6	17	NRagged	118.48	118.48	0.49	2.85	1032	>sp|P02817|AMELX_BOVIN Amelogenin, X isoform OS=Bos taurus OX=9913 GN=AMELX PE=1 SV=2	1	hf1_10472_ebo_22_1_261219.ScanId;v=1;d1=3032.3032.4	controllerType=0 controllerNumber=1 scan=3032	13.8776
00801:4	1	S.MP[+15.995]LPPHPGHPGYINFS[+79.966]YEVLTPLK.W		P[+16], S[+80]	700.848	4	2800.37	2800.36	0	4.4	17	NRagged	120.65	120.65	4	2.84	1032	>sp|P02817|AMELX_BOVIN Amelogenin, X isoform OS=Bos taurus OX=9913 GN=AMELX PE=1 SV=2	1	hf1_10472_ebo_22_1_261219.ScanId;v=1;d1=2565.2565.4	controllerType=0 controllerNumber=1 scan=2565	13.0606
44706:3	1	S.MP[+15.995]LPPHPGHPGYINFS[+79.966]YEVLTPLK.W		P[+16], S[+80]	934.129	3	2800.37	2800.36	0	5.6	17	NRagged	126.09	126.09	4	4.2	1032	>sp|P02817|AMELX_BOVIN Amelogenin, X isoform OS=Bos taurus OX=9913 GN=AMELX PE=1 SV=2	1	hf1_10472_ebo_22_1_261219.ScanId;v=1;d1=32528.32528.3	controllerType=0 controllerNumber=1 scan=32528	66.5182
37751:4	1	S.MP[+15.995]LPPHPGHPGYINFS[+79.966]YEVLTPLK.W		P[+16], S[+80]	700.85	4	2800.38	2800.36	0	6.9	17	NRagged	129.63	129.63	4	3.2	1032	>sp|P02817|AMELX_BOVIN Amelogenin, X isoform OS=Bos taurus OX=9913 GN=AMELX PE=1 SV=2	1	hf1_10472_ebo_22_1_261219.ScanId;v=1;d1=27656.27656.4	controllerType=0 controllerNumber=1 scan=27656	56.8412
27127:4	1	S.MP[+15.995]LPPHPGHPGYINFS[+79.966]YEVLTPLK.W		P[+16], S[+80]	700.849	4	2800.37	2800.36	0	6	17	NRagged	139.02	139.02	5.8	2.42	1032	>sp|P02817|AMELX_BOVIN Amelogenin, X isoform OS=Bos taurus OX=9913 GN=AMELX PE=1 SV=2	1	hf1_10472_ebo_22_1_261219.ScanId;v=1;d1=20510.20510.2	controllerType=0 controllerNumber=1 scan=20510	44.2098
34012:4	1	S.MP[+15.995]LPPHPGHPGYINFS[+79.966]YEVLTPLK.W		P[+16], S[+80]	700.849	4	2800.37	2800.36	0	5.7	17	NRagged	140.43	140.43	4	3.18	1032	>sp|P02817|AMELX_BOVIN Amelogenin, X isoform OS=Bos taurus OX=9913 GN=AMELX PE=1 SV=2	1	hf1_10472_ebo_22_1_261219.ScanId;v=1;d1=25174.25174.4	controllerType=0 controllerNumber=1 scan=25174	52.4142
26064:3	1	S.MP[+15.995]LPPHPGHPGYINFS[+79.966]YEVLTPLK.W		P[+16], S[+80]	934.128	3	2800.37	2800.36	0	4.7	17	NRagged	149.04	149.04	4	2.43	1032	>sp|P02817|AMELX_BOVIN Amelogenin, X isoform OS=Bos taurus OX=9913 GN=AMELX PE=1 SV=2	1	hf1_10472_ebo_22_1_261219.ScanId;v=1;d1=19780.19780.4	controllerType=0 controllerNumber=1 scan=19780	42.9323
44614:3	1	S.M[+15.995]PLPPHPGHPGYINFS[+79.966]YEVLTPLK.W		M[+16], S[+80]	934.127	3	2800.37	2800.36	0	3.9	17	NRagged	150.45	150.45	11.99	3.15	1032	>sp|P02817|AMELX_BOVIN Amelogenin, X isoform OS=Bos taurus OX=9913 GN=AMELX PE=1 SV=2	1	hf1_10472_ebo_22_1_261219.ScanId;v=1;d1=32430.32430.3	controllerType=0 controllerNumber=1 scan=32430	66.1804
42978:4	1	S.MP[+15.995]LPPHPGHPGYINFS[+79.966]YEVLTPLK.W		P[+16], S[+80]	700.849	4	2800.37	2800.36	0	6.2	17	NRagged	160.01	160.01	4	3.44	1032	>sp|P02817|AMELX_BOVIN Amelogenin, X isoform OS=Bos taurus OX=9913 GN=AMELX PE=1 SV=2	1	hf1_10472_ebo_22_1_261219.ScanId;v=1;d1=31163.31163.4	controllerType=0 controllerNumber=1 scan=31163	63.2392
39025:4	1	S.MP[+15.995]LPPHPGHPGYINFS[+79.966]YEVLTPLK.W		P[+16], S[+80]	700.85	4	2800.38	2800.36	0	7	17	NRagged	169.58	169.58	5.8	4.25	1032	>sp|P02817|AMELX_BOVIN Amelogenin, X isoform OS=Bos taurus OX=9913 GN=AMELX PE=1 SV=2	1	hf1_10472_ebo_22_1_261219.ScanId;v=1;d1=28491.28491.4	controllerType=0 controllerNumber=1 scan=28491	58.3352
29120:3	1	S.MP[+31.990]LPPHPGHPGYINFS[+79.966]YEVLTPLK.W		P[+32], S[+80]	939.46	3	2816.36	2816.35	0	4.4	17	NRagged	173.11	173.11	0	3.75	1032	>sp|P02817|AMELX_BOVIN Amelogenin, X isoform OS=Bos taurus OX=9913 GN=AMELX PE=1 SV=2	1	hf1_10472_ebo_22_1_261219.ScanId;v=1;d1=21886.21886.3	controllerType=0 controllerNumber=1 scan=21886	46.6107
43193:4	1	S.MP[+15.995]LPPHPGHPGYINFS[+79.966]YEVLTPLK.W		P[+16], S[+80]	700.849	4	2800.38	2800.36	0	6.7	17	NRagged	175.05	175.05	4	4.27	1032	>sp|P02817|AMELX_BOVIN Amelogenin, X isoform OS=Bos taurus OX=9913 GN=AMELX PE=1 SV=2	1	hf1_10472_ebo_22_1_261219.ScanId;v=1;d1=31320.31320.4	controllerType=0 controllerNumber=1 scan=31320	63.589
46216:3	1	S.MP[+15.995]LPPHPGHPGYINFS[+79.966]YEVLTPLK.W		P[+16], S[+80]	934.131	3	2800.38	2800.36	0	7.3	17	NRagged	176.31	176.31	4	4.42	1032	>sp|P02817|AMELX_BOVIN Amelogenin, X isoform OS=Bos taurus OX=9913 GN=AMELX PE=1 SV=2	1	hf1_10472_ebo_22_1_261219.ScanId;v=1;d1=34493.34493.3	controllerType=0 controllerNumber=1 scan=34493	73.9265
35444:4	1	S.MP[+15.995]LPPHPGHPGYINFS[+79.966]YEVLTPLK.W		P[+16], S[+80]	700.849	4	2800.38	2800.36	0	6.7	17	NRagged	179.23	179.23	5.8	4.25	1032	>sp|P02817|AMELX_BOVIN Amelogenin, X isoform OS=Bos taurus OX=9913 GN=AMELX PE=1 SV=2	1	hf1_10472_ebo_22_1_261219.ScanId;v=1;d1=26146.26146.4	controllerType=0 controllerNumber=1 scan=26146	54.1524
41850:4	1	S.MP[+15.995]LPPHPGHPGYINFS[+79.966]YEVLTPLK.W		P[+16], S[+80]	700.85	4	2800.38	2800.36	0	7.1	17	NRagged	181.9	181.9	4	4.41	1032	>sp|P02817|AMELX_BOVIN Amelogenin, X isoform OS=Bos taurus OX=9913 GN=AMELX PE=1 SV=2	1	hf1_10472_ebo_22_1_261219.ScanId;v=1;d1=30373.30373.4	controllerType=0 controllerNumber=1 scan=30373	61.7273
40522:4	1	S.MP[+15.995]LPPHPGHPGYINFS[+79.966]YEVLTPLK.W		P[+16], S[+80]	700.849	4	2800.38	2800.36	0	6.7	17	NRagged	182.31	182.31	4	4.41	1032	>sp|P02817|AMELX_BOVIN Amelogenin, X isoform OS=Bos taurus OX=9913 GN=AMELX PE=1 SV=2	1	hf1_10472_ebo_22_1_261219.ScanId;v=1;d1=29484.29484.4	controllerType=0 controllerNumber=1 scan=29484	60.1089
41288:4	1	S.MP[+15.995]LPPHPGHPGYINFS[+79.966]YEVLTPLK.W		P[+16], S[+80]	700.848	4	2800.37	2800.36	0	5.5	17	NRagged	184.44	184.44	4	4.15	1032	>sp|P02817|AMELX_BOVIN Amelogenin, X isoform OS=Bos taurus OX=9913 GN=AMELX PE=1 SV=2	1	hf1_10472_ebo_22_1_261219.ScanId;v=1;d1=29994.29994.4	controllerType=0 controllerNumber=1 scan=29994	61.0257
40218:4	1	S.MP[+15.995]LPPHPGHPGYINFS[+79.966]YEVLTPLK.W		P[+16], S[+80]	700.85	4	2800.38	2800.36	0	7	17	NRagged	187.86	187.86	4	4.25	1032	>sp|P02817|AMELX_BOVIN Amelogenin, X isoform OS=Bos taurus OX=9913 GN=AMELX PE=1 SV=2	1	hf1_10472_ebo_22_1_261219.ScanId;v=1;d1=29286.29286.4	controllerType=0 controllerNumber=1 scan=29286	59.755
38717:4	1	S.MP[+15.995]LPPHPGHPGYINFS[+79.966]YEVLTPLK.W		P[+16], S[+80]	700.85	4	2800.38	2800.36	0	7.4	17	NRagged	190.47	190.47	4	4.25	1032	>sp|P02817|AMELX_BOVIN Amelogenin, X isoform OS=Bos taurus OX=9913 GN=AMELX PE=1 SV=2	1	hf1_10472_ebo_22_1_261219.ScanId;v=1;d1=28295.28295.4	controllerType=0 controllerNumber=1 scan=28295	57.9848
40707:4	1	S.MP[+15.995]LPPHPGHPGYINFS[+79.966]YEVLTPLK.W		P[+16], S[+80]	700.85	4	2800.38	2800.36	0	7.2	17	NRagged	192	192	4	4.27	1032	>sp|P02817|AMELX_BOVIN Amelogenin, X isoform OS=Bos taurus OX=9913 GN=AMELX PE=1 SV=2	1	hf1_10472_ebo_22_1_261219.ScanId;v=1;d1=29607.29607.4	controllerType=0 controllerNumber=1 scan=29607	60.328
44167:4	1	S.MP[+15.995]LPPHPGHPGYINFS[+79.966]YEVLTPLK.W		P[+16], S[+80]	700.847	4	2800.37	2800.36	0	3.2	17	NRagged	192.32	192.32	4	3.72	1032	>sp|P02817|AMELX_BOVIN Amelogenin, X isoform OS=Bos taurus OX=9913 GN=AMELX PE=1 SV=2	1	hf1_10472_ebo_22_1_261219.ScanId;v=1;d1=32015.32015.4	controllerType=0 controllerNumber=1 scan=32015	64.9834
36198:4	1	S.MP[+15.995]LPPHPGHPGYINFS[+79.966]YEVLTPLK.W		P[+16], S[+80]	700.85	4	2800.38	2800.36	0	7.8	17	NRagged	195.25	195.25	3.66	4.25	1032	>sp|P02817|AMELX_BOVIN Amelogenin, X isoform OS=Bos taurus OX=9913 GN=AMELX PE=1 SV=2	1	hf1_10472_ebo_22_1_261219.ScanId;v=1;d1=26633.26633.4	controllerType=0 controllerNumber=1 scan=26633	55.0198
46214:4	1	S.MP[+15.995]LPPHPGHPGYINFS[+79.966]YEVLTPLK.W		P[+16], S[+80]	700.85	4	2800.38	2800.36	0	7.4	17	NRagged	204.94	204.94	4	4.72	1032	>sp|P02817|AMELX_BOVIN Amelogenin, X isoform OS=Bos taurus OX=9913 GN=AMELX PE=1 SV=2	1	hf1_10472_ebo_22_1_261219.ScanId;v=1;d1=34492.34492.4	controllerType=0 controllerNumber=1 scan=34492	73.925
27887:4	1	S.MPLPPHPGHPGYIN[+0.984]FS[+79.966]YEVLTPLK.W		N[+1], S[+80]	697.09	4	2785.34	2785.35	0	-2.3	17	NRagged	205.54	205.54	32.56	2.84	1032	>sp|P02817|AMELX_BOVIN Amelogenin, X isoform OS=Bos taurus OX=9913 GN=AMELX PE=1 SV=2	1	hf1_10472_ebo_22_1_261219.ScanId;v=1;d1=21024.21024.4	controllerType=0 controllerNumber=1 scan=21024	45.0992
44362:3	1	S.M[+15.995]PLPPHPGHPGYINFS[+79.966]YEVLTPLK.W		M[+16], S[+80]	934.127	3	2800.37	2800.36	0	3.9	17	NRagged	213.52	213.52	18.33	3.88	1032	>sp|P02817|AMELX_BOVIN Amelogenin, X isoform OS=Bos taurus OX=9913 GN=AMELX PE=1 SV=2	1	hf1_10472_ebo_22_1_261219.ScanId;v=1;d1=32192.32192.3	controllerType=0 controllerNumber=1 scan=32192	65.5015
44419:4	1	S.MP[+15.995]LPPHPGHPGYINFS[+79.966]YEVLTPLK.W		P[+16], S[+80]	700.848	4	2800.37	2800.36	0	4.2	17	NRagged	220.98	220.98	4	4.02	1032	>sp|P02817|AMELX_BOVIN Amelogenin, X isoform OS=Bos taurus OX=9913 GN=AMELX PE=1 SV=2	1	hf1_10472_ebo_22_1_261219.ScanId;v=1;d1=32248.32248.4	controllerType=0 controllerNumber=1 scan=32248	65.6672
36811:4	1	S.MP[+15.995]LPPHPGHPGYINFS[+79.966]YEVLTPLK.W		P[+16], S[+80]	700.849	4	2800.38	2800.36	0	6.8	17	NRagged	224.15	224.15	4	4.72	1032	>sp|P02817|AMELX_BOVIN Amelogenin, X isoform OS=Bos taurus OX=9913 GN=AMELX PE=1 SV=2	1	hf1_10472_ebo_22_1_261219.ScanId;v=1;d1=27036.27036.4	controllerType=0 controllerNumber=1 scan=27036	55.7358
26530:3	1	S.MP[+15.995]LPPHPGHPGYINFS[+79.966]YEVLTPLK.W		P[+16], S[+80]	934.129	3	2800.37	2800.36	0	5.9	17	NRagged	230.06	230.06	5.8	4.04	1032	>sp|P02817|AMELX_BOVIN Amelogenin, X isoform OS=Bos taurus OX=9913 GN=AMELX PE=1 SV=2	1	hf1_10472_ebo_22_1_261219.ScanId;v=1;d1=20101.20101.3	controllerType=0 controllerNumber=1 scan=20101	43.4963
43768:4	1	S.MP[+15.995]LPPHPGHPGYINFS[+79.966]YEVLTPLK.W		P[+16], S[+80]	700.849	4	2800.38	2800.36	0	6.6	17	NRagged	230.26	230.26	4	4.72	1032	>sp|P02817|AMELX_BOVIN Amelogenin, X isoform OS=Bos taurus OX=9913 GN=AMELX PE=1 SV=2	1	hf1_10472_ebo_22_1_261219.ScanId;v=1;d1=31703.31703.4	controllerType=0 controllerNumber=1 scan=31703	64.2939
39330:4	1	S.MP[+15.995]LPPHPGHPGYINFS[+79.966]YEVLTPLK.W		P[+16], S[+80]	700.849	4	2800.37	2800.36	0	6.3	17	NRagged	237.75	237.75	4	4.94	1032	>sp|P02817|AMELX_BOVIN Amelogenin, X isoform OS=Bos taurus OX=9913 GN=AMELX PE=1 SV=2	1	hf1_10472_ebo_22_1_261219.ScanId;v=1;d1=28694.28694.4	controllerType=0 controllerNumber=1 scan=28694	58.696
41581:4	1	S.MP[+15.995]LPPHPGHPGYINFS[+79.966]YEVLTPLK.W		P[+16], S[+80]	700.849	4	2800.38	2800.36	0	6.7	17	NRagged	246.85	246.85	4	5.52	1032	>sp|P02817|AMELX_BOVIN Amelogenin, X isoform OS=Bos taurus OX=9913 GN=AMELX PE=1 SV=2	1	hf1_10472_ebo_22_1_261219.ScanId;v=1;d1=30191.30191.4	controllerType=0 controllerNumber=1 scan=30191	61.3825
43976:4	1	S.MP[+15.995]LPPHPGHPGYINFS[+79.966]YEVLTPLK.W		P[+16], S[+80]	700.848	4	2800.37	2800.36	0	5.3	17	NRagged	256.96	256.96	4	5.47	1032	>sp|P02817|AMELX_BOVIN Amelogenin, X isoform OS=Bos taurus OX=9913 GN=AMELX PE=1 SV=2	1	hf1_10472_ebo_22_1_261219.ScanId;v=1;d1=31863.31863.4	controllerType=0 controllerNumber=1 scan=31863	64.6385
36273:3	1	S.MP[+15.995]LPPHPGHPGYINFS[+79.966]YEVLTPLK.W		P[+16], S[+80]	934.126	3	2800.36	2800.36	0	2.6	17	NRagged	267.3	267.3	4	4.66	1032	>sp|P02817|AMELX_BOVIN Amelogenin, X isoform OS=Bos taurus OX=9913 GN=AMELX PE=1 SV=2	1	hf1_10472_ebo_22_1_261219.ScanId;v=1;d1=26681.26681.3	controllerType=0 controllerNumber=1 scan=26681	55.1038
31508:4	1	S.MP[+15.995]LPPHPGHPGYINFS[+79.966]YEVLTPLK.W		P[+16], S[+80]	700.849	4	2800.37	2800.36	0	6.2	17	NRagged	270.88	270.88	0.45	5.11	1032	>sp|P02817|AMELX_BOVIN Amelogenin, X isoform OS=Bos taurus OX=9913 GN=AMELX PE=1 SV=2	1	hf1_10472_ebo_22_1_261219.ScanId;v=1;d1=23517.23517.6	controllerType=0 controllerNumber=1 scan=23517	49.4739
29169:4	1	S.MP[+31.990]LPPHPGHPGYINFS[+79.966]YEVLTPLK.W		P[+32], S[+80]	704.846	4	2816.36	2816.35	0	3.7	17	NRagged	281.58	281.58	1.8	4.99	1032	>sp|P02817|AMELX_BOVIN Amelogenin, X isoform OS=Bos taurus OX=9913 GN=AMELX PE=1 SV=2	1	hf1_10472_ebo_22_1_261219.ScanId;v=1;d1=21917.21917.4	controllerType=0 controllerNumber=1 scan=21917	46.6659
39940:3	1	S.MP[+15.995]LPPHPGHPGYINFS[+79.966]YEVLTPLK.W		P[+16], S[+80]	934.13	3	2800.37	2800.36	0	6.3	17	NRagged	310.64	310.64	4	5.71	1032	>sp|P02817|AMELX_BOVIN Amelogenin, X isoform OS=Bos taurus OX=9913 GN=AMELX PE=1 SV=2	1	hf1_10472_ebo_22_1_261219.ScanId;v=1;d1=29100.29100.3	controllerType=0 controllerNumber=1 scan=29100	59.422
44081:3	1	S.MP[+15.995]LPPHPGHPGYINFS[+79.966]YEVLTPLK.W		P[+16], S[+80]	934.13	3	2800.38	2800.36	0	6.9	17	NRagged	323.47	323.47	4	6.26	1032	>sp|P02817|AMELX_BOVIN Amelogenin, X isoform OS=Bos taurus OX=9913 GN=AMELX PE=1 SV=2	1	hf1_10472_ebo_22_1_261219.ScanId;v=1;d1=31947.31947.3	controllerType=0 controllerNumber=1 scan=31947	64.8272
32935:4	1	S.MP[+15.995]LPPHPGHPGYINFS[+79.966]YEVLTPLK.W		P[+16], S[+80]	700.849	4	2800.37	2800.36	0	6.3	17	NRagged	323.51	323.51	5.8	5.88	1032	>sp|P02817|AMELX_BOVIN Amelogenin, X isoform OS=Bos taurus OX=9913 GN=AMELX PE=1 SV=2	1	hf1_10472_ebo_22_1_261219.ScanId;v=1;d1=24456.24456.4	controllerType=0 controllerNumber=1 scan=24456	51.1319
43886:3	1	S.MP[+15.995]LPPHPGHPGYINFS[+79.966]YEVLTPLK.W		P[+16], S[+80]	934.13	3	2800.37	2800.36	0	6.3	17	NRagged	333.53	333.53	4	6.03	1032	>sp|P02817|AMELX_BOVIN Amelogenin, X isoform OS=Bos taurus OX=9913 GN=AMELX PE=1 SV=2	1	hf1_10472_ebo_22_1_261219.ScanId;v=1;d1=31795.31795.3	controllerType=0 controllerNumber=1 scan=31795	64.4853
35410:3	1	S.M[+15.995]PLPPHPGHPGYINFS[+79.966]YEVLTPLK.W		M[+16], S[+80]	934.129	3	2800.37	2800.36	0	5.8	17	NRagged	335.15	335.15	8.23	5.62	1032	>sp|P02817|AMELX_BOVIN Amelogenin, X isoform OS=Bos taurus OX=9913 GN=AMELX PE=1 SV=2	1	hf1_10472_ebo_22_1_261219.ScanId;v=1;d1=26123.26123.3	controllerType=0 controllerNumber=1 scan=26123	54.1117
33228:4	1	S.MP[+15.995]LPPHPGHPGYINFS[+79.966]YEVLTPLK.W		P[+16], S[+80]	700.849	4	2800.37	2800.36	0	5.7	17	NRagged	337.82	337.82	5.8	5.61	1032	>sp|P02817|AMELX_BOVIN Amelogenin, X isoform OS=Bos taurus OX=9913 GN=AMELX PE=1 SV=2	1	hf1_10472_ebo_22_1_261219.ScanId;v=1;d1=24652.24652.4	controllerType=0 controllerNumber=1 scan=24652	51.4828
44240:3	1	S.M[+15.995]PLPPHPGHPGYINFS[+79.966]YEVLTPLK.W		M[+16], S[+80]	934.129	3	2800.37	2800.36	0	5.7	17	NRagged	343.75	343.75	29.33	5.99	1032	>sp|P02817|AMELX_BOVIN Amelogenin, X isoform OS=Bos taurus OX=9913 GN=AMELX PE=1 SV=2	1	hf1_10472_ebo_22_1_261219.ScanId;v=1;d1=32079.32079.3	controllerType=0 controllerNumber=1 scan=32079	65.1628
32740:4	1	S.MP[+15.995]LPPHPGHPGYINFS[+79.966]YEVLTPLK.W		P[+16], S[+80]	700.848	4	2800.37	2800.36	0	5.5	17	NRagged	344.37	344.37	5.8	5.76	1032	>sp|P02817|AMELX_BOVIN Amelogenin, X isoform OS=Bos taurus OX=9913 GN=AMELX PE=1 SV=2	1	hf1_10472_ebo_22_1_261219.ScanId;v=1;d1=24328.24328.6	controllerType=0 controllerNumber=1 scan=24328	50.9062
43478:4	1	S.MP[+15.995]LPPHPGHPGYINFS[+79.966]YEVLTPLK.W		P[+16], S[+80]	700.848	4	2800.37	2800.36	0	5.2	17	NRagged	345.76	345.76	4	6.63	1032	>sp|P02817|AMELX_BOVIN Amelogenin, X isoform OS=Bos taurus OX=9913 GN=AMELX PE=1 SV=2	1	hf1_10472_ebo_22_1_261219.ScanId;v=1;d1=31508.31508.4	controllerType=0 controllerNumber=1 scan=31508	63.9396
01075:4	1	S.MP[+15.995]LPPHPGHPGYINFS[+79.966]YEVLTPLK.W		P[+16], S[+80]	700.847	4	2800.37	2800.36	0	3.6	17	NRagged	358.79	358.79	4	6.2	1032	>sp|P02817|AMELX_BOVIN Amelogenin, X isoform OS=Bos taurus OX=9913 GN=AMELX PE=1 SV=2	1	hf1_10472_ebo_22_1_261219.ScanId;v=1;d1=2758.2758.4	controllerType=0 controllerNumber=1 scan=2758	13.4028
42646:3	1	S.MP[+15.995]LPPHPGHPGYINFS[+79.966]YEVLTPLK.W		P[+16], S[+80]	934.13	3	2800.38	2800.36	0	7	17	NRagged	359.01	359.01	4	6.03	1032	>sp|P02817|AMELX_BOVIN Amelogenin, X isoform OS=Bos taurus OX=9913 GN=AMELX PE=1 SV=2	1	hf1_10472_ebo_22_1_261219.ScanId;v=1;d1=30922.30922.3	controllerType=0 controllerNumber=1 scan=30922	62.7581
33272:3	1	S.MPLPPHPGHPGYIN[+0.984]FS[+79.966]YEVLTPLK.W		N[+1], S[+80]	929.128	3	2785.37	2785.35	0	8.1	17	NRagged	365.66	365.66	110.01	6.85	1032	>sp|P02817|AMELX_BOVIN Amelogenin, X isoform OS=Bos taurus OX=9913 GN=AMELX PE=1 SV=2	1	hf1_10472_ebo_22_1_261219.ScanId;v=1;d1=24682.24682.3	controllerType=0 controllerNumber=1 scan=24682	51.5365
00889:3	1	S.M[+15.995]PLPPHPGHPGYINFS[+79.966]YEVLTPLK.W		M[+16], S[+80]	934.126	3	2800.36	2800.36	0	2	17	NRagged	366.57	366.57	11.59	6.69	1032	>sp|P02817|AMELX_BOVIN Amelogenin, X isoform OS=Bos taurus OX=9913 GN=AMELX PE=1 SV=2	1	hf1_10472_ebo_22_1_261219.ScanId;v=1;d1=2626.2626.3	controllerType=0 controllerNumber=1 scan=2626	13.171
44483:3	1	S.M[+15.995]PLPPHPGHPGYINFS[+79.966]YEVLTPLK.W		M[+16], S[+80]	934.128	3	2800.37	2800.36	0	4.6	17	NRagged	372.95	372.95	34.74	6.95	1032	>sp|P02817|AMELX_BOVIN Amelogenin, X isoform OS=Bos taurus OX=9913 GN=AMELX PE=1 SV=2	1	hf1_10472_ebo_22_1_261219.ScanId;v=1;d1=32307.32307.3	controllerType=0 controllerNumber=1 scan=32307	65.8378
27917:5	1	S.MP[+15.995]LPPHPGHPGYINFS[+79.966]YEVLTPLK.W		P[+16], S[+80]	560.88	5	2800.37	2800.36	0	4.8	17	NRagged	375.75	375.75	4	6.02	1032	>sp|P02817|AMELX_BOVIN Amelogenin, X isoform OS=Bos taurus OX=9913 GN=AMELX PE=1 SV=2	1	hf1_10472_ebo_22_1_261219.ScanId;v=1;d1=21047.21047.5	controllerType=0 controllerNumber=1 scan=21047	45.1389
38862:3	1	S.M[+15.995]PLPPHPGHPGYINFS[+79.966]YEVLTPLK.W		M[+16], S[+80]	934.131	3	2800.38	2800.36	0	7.7	17	NRagged	387.18	387.18	7.86	7.22	1032	>sp|P02817|AMELX_BOVIN Amelogenin, X isoform OS=Bos taurus OX=9913 GN=AMELX PE=1 SV=2	1	hf1_10472_ebo_22_1_261219.ScanId;v=1;d1=28386.28386.3	controllerType=0 controllerNumber=1 scan=28386	58.1464
33903:3	1	S.M[+15.995]PLPPHPGHPGYINFS[+79.966]YEVLTPLK.W		M[+16], S[+80]	934.13	3	2800.38	2800.36	0	7	17	NRagged	388.79	388.79	8.33	7	1032	>sp|P02817|AMELX_BOVIN Amelogenin, X isoform OS=Bos taurus OX=9913 GN=AMELX PE=1 SV=2	1	hf1_10472_ebo_22_1_261219.ScanId;v=1;d1=25102.25102.3	controllerType=0 controllerNumber=1 scan=25102	52.284
41271:3	1	S.M[+15.995]PLPPHPGHPGYINFS[+79.966]YEVLTPLK.W		M[+16], S[+80]	934.13	3	2800.37	2800.36	0	6.4	17	NRagged	389.94	389.94	18.17	7	1032	>sp|P02817|AMELX_BOVIN Amelogenin, X isoform OS=Bos taurus OX=9913 GN=AMELX PE=1 SV=2	1	hf1_10472_ebo_22_1_261219.ScanId;v=1;d1=29983.29983.3	controllerType=0 controllerNumber=1 scan=29983	61.006
30640:4	1	S.MP[+15.995]LPPHPGHPGYINFS[+79.966]YEVLTPLK.W		P[+16], S[+80]	700.849	4	2800.38	2800.36	0	6.8	17	NRagged	397.28	397.28	5.8	6.99	1032	>sp|P02817|AMELX_BOVIN Amelogenin, X isoform OS=Bos taurus OX=9913 GN=AMELX PE=1 SV=2	1	hf1_10472_ebo_22_1_261219.ScanId;v=1;d1=22921.22921.4	controllerType=0 controllerNumber=1 scan=22921	48.42
34594:3	1	S.M[+15.995]PLPPHPGHPGYINFS[+79.966]YEVLTPLK.W		M[+16], S[+80]	934.131	3	2800.38	2800.36	0	7.7	17	NRagged	409.34	409.34	19.43	7.22	1032	>sp|P02817|AMELX_BOVIN Amelogenin, X isoform OS=Bos taurus OX=9913 GN=AMELX PE=1 SV=2	1	hf1_10472_ebo_22_1_261219.ScanId;v=1;d1=25564.25564.3	controllerType=0 controllerNumber=1 scan=25564	53.111
36218:3	1	S.M[+15.995]PLPPHPGHPGYINFS[+79.966]YEVLTPLK.W		M[+16], S[+80]	934.126	3	2800.36	2800.36	0	2.6	17	NRagged	410.11	410.11	15.14	6.3	1032	>sp|P02817|AMELX_BOVIN Amelogenin, X isoform OS=Bos taurus OX=9913 GN=AMELX PE=1 SV=2	1	hf1_10472_ebo_22_1_261219.ScanId;v=1;d1=26645.26645.3	controllerType=0 controllerNumber=1 scan=26645	55.0408
31153:4	1	S.MP[+15.995]LPPHPGHPGYINFS[+79.966]YEVLTPLK.W		P[+16], S[+80]	700.847	4	2800.37	2800.36	0	3.3	17	NRagged	424.58	424.58	4	6.52	1032	>sp|P02817|AMELX_BOVIN Amelogenin, X isoform OS=Bos taurus OX=9913 GN=AMELX PE=1 SV=2	1	hf1_10472_ebo_22_1_261219.ScanId;v=1;d1=23281.23281.4	controllerType=0 controllerNumber=1 scan=23281	49.0589
41831:3	1	S.M[+15.995]PLPPHPGHPGYINFS[+79.966]YEVLTPLK.W		M[+16], S[+80]	934.13	3	2800.38	2800.36	0	6.6	17	NRagged	430.95	430.95	18.14	7.22	1032	>sp|P02817|AMELX_BOVIN Amelogenin, X isoform OS=Bos taurus OX=9913 GN=AMELX PE=1 SV=2	1	hf1_10472_ebo_22_1_261219.ScanId;v=1;d1=30361.30361.3	controllerType=0 controllerNumber=1 scan=30361	61.706
38542:3	1	S.M[+15.995]PLPPHPGHPGYINFS[+79.966]YEVLTPLK.W		M[+16], S[+80]	934.13	3	2800.37	2800.36	0	6.2	17	NRagged	445.18	445.18	22.84	6.83	1032	>sp|P02817|AMELX_BOVIN Amelogenin, X isoform OS=Bos taurus OX=9913 GN=AMELX PE=1 SV=2	1	hf1_10472_ebo_22_1_261219.ScanId;v=1;d1=28178.28178.3	controllerType=0 controllerNumber=1 scan=28178	57.7752
39559:3	1	S.M[+15.995]PLPPHPGHPGYINFS[+79.966]YEVLTPLK.W		M[+16], S[+80]	934.13	3	2800.37	2800.36	0	6.3	17	NRagged	453.1	453.1	12.78	7.97	1032	>sp|P02817|AMELX_BOVIN Amelogenin, X isoform OS=Bos taurus OX=9913 GN=AMELX PE=1 SV=2	1	hf1_10472_ebo_22_1_261219.ScanId;v=1;d1=28845.28845.3	controllerType=0 controllerNumber=1 scan=28845	58.9667
26153:3	1	S.M[+15.995]PLPPHPGHPGYINFS[+79.966]YEVLTPLK.W		M[+16], S[+80]	934.131	3	2800.38	2800.36	0	8.1	17	NRagged	456.28	456.28	41.99	7.32	1032	>sp|P02817|AMELX_BOVIN Amelogenin, X isoform OS=Bos taurus OX=9913 GN=AMELX PE=1 SV=2	1	hf1_10472_ebo_22_1_261219.ScanId;v=1;d1=19845.19845.3	controllerType=0 controllerNumber=1 scan=19845	43.0464
00308:3	1	S.M[+15.995]PLPPHPGHPGYINFS[+79.966]YEVLTPLK.W		M[+16], S[+80]	934.129	3	2800.37	2800.36	0	5.6	17	NRagged	473.92	473.92	14.02	7.7	1032	>sp|P02817|AMELX_BOVIN Amelogenin, X isoform OS=Bos taurus OX=9913 GN=AMELX PE=1 SV=2	1	hf1_10472_ebo_22_1_261219.ScanId;v=1;d1=719.719.3	controllerType=0 controllerNumber=1 scan=719	3.3799
32108:3	1	S.M[+15.995]PLPPHPGHPGYINFS[+79.966]YEVLTPLK.W		M[+16], S[+80]	934.128	3	2800.37	2800.36	0	4.1	17	NRagged	485.29	485.29	8.23	6.61	1032	>sp|P02817|AMELX_BOVIN Amelogenin, X isoform OS=Bos taurus OX=9913 GN=AMELX PE=1 SV=2	1	hf1_10472_ebo_22_1_261219.ScanId;v=1;d1=23911.23911.3	controllerType=0 controllerNumber=1 scan=23911	50.1708
39259:3	1	S.M[+15.995]PLPPHPGHPGYINFS[+79.966]YEVLTPLK.W		M[+16], S[+80]	934.129	3	2800.37	2800.36	0	6	17	NRagged	491	491	29.91	7.7	1032	>sp|P02817|AMELX_BOVIN Amelogenin, X isoform OS=Bos taurus OX=9913 GN=AMELX PE=1 SV=2	1	hf1_10472_ebo_22_1_261219.ScanId;v=1;d1=28649.28649.3	controllerType=0 controllerNumber=1 scan=28649	58.6161
43643:3	1	S.MP[+15.995]LPPHPGHPGYINFS[+79.966]YEVLTPLK.W		P[+16], S[+80]	934.128	3	2800.37	2800.36	0	4.5	17	NRagged	501.19	501.19	4	7.7	1032	>sp|P02817|AMELX_BOVIN Amelogenin, X isoform OS=Bos taurus OX=9913 GN=AMELX PE=1 SV=2	1	hf1_10472_ebo_22_1_261219.ScanId;v=1;d1=31619.31619.3	controllerType=0 controllerNumber=1 scan=31619	64.137
41563:3	1	S.M[+15.995]PLPPHPGHPGYINFS[+79.966]YEVLTPLK.W		M[+16], S[+80]	934.132	3	2800.38	2800.36	0	8.4	17	NRagged	509.65	509.65	3.58	7.17	1032	>sp|P02817|AMELX_BOVIN Amelogenin, X isoform OS=Bos taurus OX=9913 GN=AMELX PE=1 SV=2	1	hf1_10472_ebo_22_1_261219.ScanId;v=1;d1=30180.30180.3	controllerType=0 controllerNumber=1 scan=30180	61.3628
42388:3	1	S.M[+15.995]PLPPHPGHPGYINFS[+79.966]YEVLTPLK.W		M[+16], S[+80]	934.129	3	2800.37	2800.36	0	5.4	17	NRagged	517.97	517.97	35.93	7.7	1032	>sp|P02817|AMELX_BOVIN Amelogenin, X isoform OS=Bos taurus OX=9913 GN=AMELX PE=1 SV=2	1	hf1_10472_ebo_22_1_261219.ScanId;v=1;d1=30740.30740.3	controllerType=0 controllerNumber=1 scan=30740	62.4118
30342:4	1	S.MP[+15.995]LPPHPGHPGYINFS[+79.966]YEVLTPLK.W		P[+16], S[+80]	700.847	4	2800.37	2800.36	0	3.8	17	NRagged	529.23	529.23	5.8	7.38	1032	>sp|P02817|AMELX_BOVIN Amelogenin, X isoform OS=Bos taurus OX=9913 GN=AMELX PE=1 SV=2	1	hf1_10472_ebo_22_1_261219.ScanId;v=1;d1=22715.22715.4	controllerType=0 controllerNumber=1 scan=22715	48.0618
27373:3	1	S.M[+15.995]PLPPHPGHPGYINFS[+79.966]YEVLTPLK.W		M[+16], S[+80]	934.13	3	2800.38	2800.36	0	6.7	17	NRagged	535.04	535.04	22.4	7.43	1032	>sp|P02817|AMELX_BOVIN Amelogenin, X isoform OS=Bos taurus OX=9913 GN=AMELX PE=1 SV=2	1	hf1_10472_ebo_22_1_261219.ScanId;v=1;d1=20681.20681.4	controllerType=0 controllerNumber=1 scan=20681	44.5084
27727:4	1	S.M[+15.995]PLPPHPGHPGYINFS[+79.966]YEVLTPLK.W		M[+16], S[+80]	700.848	4	2800.37	2800.36	0	4.2	17	NRagged	538.78	538.78	5.65	7.38	1032	>sp|P02817|AMELX_BOVIN Amelogenin, X isoform OS=Bos taurus OX=9913 GN=AMELX PE=1 SV=2	1	hf1_10472_ebo_22_1_261219.ScanId;v=1;d1=20916.20916.4	controllerType=0 controllerNumber=1 scan=20916	44.9135
42120:3	1	S.M[+15.995]PLPPHPGHPGYINFS[+79.966]YEVLTPLK.W		M[+16], S[+80]	934.131	3	2800.38	2800.36	0	7.9	17	NRagged	556.84	556.84	31.57	8.09	1032	>sp|P02817|AMELX_BOVIN Amelogenin, X isoform OS=Bos taurus OX=9913 GN=AMELX PE=1 SV=2	1	hf1_10472_ebo_22_1_261219.ScanId;v=1;d1=30558.30558.3	controllerType=0 controllerNumber=1 scan=30558	62.0722
30044:4	1	S.MP[+15.995]LPPHPGHPGYINFS[+79.966]YEVLTPLK.W		P[+16], S[+80]	700.846	4	2800.36	2800.36	0	1.3	17	NRagged	565.92	565.92	5.8	7.62	1032	>sp|P02817|AMELX_BOVIN Amelogenin, X isoform OS=Bos taurus OX=9913 GN=AMELX PE=1 SV=2	1	hf1_10472_ebo_22_1_261219.ScanId;v=1;d1=22511.22511.4	controllerType=0 controllerNumber=1 scan=22511	47.7044
00111:4	1	S.MP[+15.995]LPPHPGHPGYINFS[+79.966]YEVLTPLK.W		P[+16], S[+80]	700.848	4	2800.37	2800.36	0	4.2	17	NRagged	571.98	571.98	4	8.12	1032	>sp|P02817|AMELX_BOVIN Amelogenin, X isoform OS=Bos taurus OX=9913 GN=AMELX PE=1 SV=2	1	hf1_10472_ebo_22_1_261219.ScanId;v=1;d1=127.127.4	controllerType=0 controllerNumber=1 scan=127	0.3985
40238:3	1	S.M[+15.995]PLPPHPGHPGYINFS[+79.966]YEVLTPLK.W		M[+16], S[+80]	934.129	3	2800.37	2800.36	0	5.8	17	NRagged	576	576	44.92	8.55	1032	>sp|P02817|AMELX_BOVIN Amelogenin, X isoform OS=Bos taurus OX=9913 GN=AMELX PE=1 SV=2	1	hf1_10472_ebo_22_1_261219.ScanId;v=1;d1=29299.29299.3	controllerType=0 controllerNumber=1 scan=29299	59.7778
40534:3	1	S.M[+15.995]PLPPHPGHPGYINFS[+79.966]YEVLTPLK.W		M[+16], S[+80]	934.129	3	2800.37	2800.36	0	5.6	17	NRagged	578.57	578.57	29.96	8.55	1032	>sp|P02817|AMELX_BOVIN Amelogenin, X isoform OS=Bos taurus OX=9913 GN=AMELX PE=1 SV=2	1	hf1_10472_ebo_22_1_261219.ScanId;v=1;d1=29492.29492.3	controllerType=0 controllerNumber=1 scan=29492	60.124
01171:3	1	S.M[+15.995]PLPPHPGHPGYINFS[+79.966]YEVLTPLK.W		M[+16], S[+80]	934.128	3	2800.37	2800.36	0	4.6	17	NRagged	582.45	582.45	32.75	8.55	1032	>sp|P02817|AMELX_BOVIN Amelogenin, X isoform OS=Bos taurus OX=9913 GN=AMELX PE=1 SV=2	1	hf1_10472_ebo_22_1_261219.ScanId;v=1;d1=2823.2823.3	controllerType=0 controllerNumber=1 scan=2823	13.516
27491:4	1	S.MP[+15.995]LPPHPGHPGYIN[+0.984]FSYEVLTPLK.W		N[+1], P[+16]	681.106	4	2721.4	2721.37	0	9.5	17	NRagged	591.31	575.75	5.8	8.01	1032	>sp|P02817|AMELX_BOVIN Amelogenin, X isoform OS=Bos taurus OX=9913 GN=AMELX PE=1 SV=2	1	hf1_10472_ebo_22_1_261219.ScanId;v=1;d1=20756.20756.4	controllerType=0 controllerNumber=1 scan=20756	44.6393
28669:2	1	S.M[+15.995]PLPPHPGHPGYINFS[+79.966]YEVLTPLK.W		M[+16], S[+80]	1400.69	2	2800.38	2800.36	0	7.7	17	NRagged	600.89	600.89	38.82	8.27	1032	>sp|P02817|AMELX_BOVIN Amelogenin, X isoform OS=Bos taurus OX=9913 GN=AMELX PE=1 SV=2	1	hf1_10472_ebo_22_1_261219.ScanId;v=1;d1=21570.21570.2	controllerType=0 controllerNumber=1 scan=21570	46.0593
42888:3	1	S.M[+15.995]PLPPHPGHPGYINFS[+79.966]YEVLTPLK.W		M[+16], S[+80]	934.13	3	2800.38	2800.36	0	6.9	17	NRagged	602.46	602.46	14.67	9.82	1032	>sp|P02817|AMELX_BOVIN Amelogenin, X isoform OS=Bos taurus OX=9913 GN=AMELX PE=1 SV=2	1	hf1_10472_ebo_22_1_261219.ScanId;v=1;d1=31096.31096.3	controllerType=0 controllerNumber=1 scan=31096	63.0955
27074:3	1	S.M[+15.995]PLPPHPGHPGYINFS[+79.966]YEVLTPLK.W		M[+16], S[+80]	934.13	3	2800.38	2800.36	0	6.9	17	NRagged	604.15	604.15	15.53	9.82	1032	>sp|P02817|AMELX_BOVIN Amelogenin, X isoform OS=Bos taurus OX=9913 GN=AMELX PE=1 SV=2	1	hf1_10472_ebo_22_1_261219.ScanId;v=1;d1=20471.20471.3	controllerType=0 controllerNumber=1 scan=20471	44.1423
43093:3	1	S.M[+15.995]PLPPHPGHPGYINFS[+79.966]YEVLTPLK.W		M[+16], S[+80]	934.13	3	2800.38	2800.36	0	7	17	NRagged	614.09	614.09	14.2	9.82	1032	>sp|P02817|AMELX_BOVIN Amelogenin, X isoform OS=Bos taurus OX=9913 GN=AMELX PE=1 SV=2	1	hf1_10472_ebo_22_1_261219.ScanId;v=1;d1=31250.31250.3	controllerType=0 controllerNumber=1 scan=31250	63.4398
43346:3	1	S.M[+15.995]PLPPHPGHPGYINFS[+79.966]YEVLTPLK.W		M[+16], S[+80]	934.13	3	2800.38	2800.36	0	6.7	17	NRagged	614.1	614.1	38.69	9.82	1032	>sp|P02817|AMELX_BOVIN Amelogenin, X isoform OS=Bos taurus OX=9913 GN=AMELX PE=1 SV=2	1	hf1_10472_ebo_22_1_261219.ScanId;v=1;d1=31420.31420.3	controllerType=0 controllerNumber=1 scan=31420	63.7817
31349:3	1	S.M[+15.995]PLPPHPGHPGYINFS[+79.966]YEVLTPLK.W		M[+16], S[+80]	934.128	3	2800.37	2800.36	0	4.5	17	NRagged	618.73	618.73	17.48	9.55	1032	>sp|P02817|AMELX_BOVIN Amelogenin, X isoform OS=Bos taurus OX=9913 GN=AMELX PE=1 SV=2	1	hf1_10472_ebo_22_1_261219.ScanId;v=1;d1=23406.23406.3	controllerType=0 controllerNumber=1 scan=23406	49.2806
31068:4	1	S.MPLPPHPGHPGYIN[+0.984]FS[+79.966]YEVLTPLK.W		N[+1], S[+80]	697.097	4	2785.36	2785.35	0	6.7	17	NRagged	636.81	636.81	334.13	9.82	1032	>sp|P02817|AMELX_BOVIN Amelogenin, X isoform OS=Bos taurus OX=9913 GN=AMELX PE=1 SV=2	1	hf1_10472_ebo_22_1_261219.ScanId;v=1;d1=23222.23222.4	controllerType=0 controllerNumber=1 scan=23222	48.9538
29165:4	1	S.MP[+15.995]LPPHPGHPGYINFS[+79.966]YEVLTPLK.W		P[+16], S[+80]	700.846	4	2800.36	2800.36	0	2.6	17	NRagged	649.66	649.66	5.8	9.12	1032	>sp|P02817|AMELX_BOVIN Amelogenin, X isoform OS=Bos taurus OX=9913 GN=AMELX PE=1 SV=2	1	hf1_10472_ebo_22_1_261219.ScanId;v=1;d1=21915.21915.4	controllerType=0 controllerNumber=1 scan=21915	46.6629
32882:3	1	S.MP[+15.995]LPPHPGHPGYINFS[+79.966]YEVLTPLK.W		P[+16], S[+80]	934.128	3	2800.37	2800.36	0	4.7	17	NRagged	654.8	654.8	5.8	10.55	1032	>sp|P02817|AMELX_BOVIN Amelogenin, X isoform OS=Bos taurus OX=9913 GN=AMELX PE=1 SV=2	1	hf1_10472_ebo_22_1_261219.ScanId;v=1;d1=24421.24421.3	controllerType=0 controllerNumber=1 scan=24421	51.0706
46098:4	1	S.MP[+15.995]LPPHPGHPGYINFS[+79.966]YEVLTPLK.W		P[+16], S[+80]	700.85	4	2800.38	2800.36	0	7.6	17	NRagged	680.19	680.19	5.8	10.82	1032	>sp|P02817|AMELX_BOVIN Amelogenin, X isoform OS=Bos taurus OX=9913 GN=AMELX PE=1 SV=2	1	hf1_10472_ebo_22_1_261219.ScanId;v=1;d1=34385.34385.4	controllerType=0 controllerNumber=1 scan=34385	73.5817
29464:4	1	S.MPLPPHPGH[+15.995]PGYINFS[+79.966]YEVLTPLK.W		H[+16], S[+80]	700.848	4	2800.37	2800.36	0	4.7	17	NRagged	684.89	684.89	1.77	10.55	1032	>sp|P02817|AMELX_BOVIN Amelogenin, X isoform OS=Bos taurus OX=9913 GN=AMELX PE=1 SV=2	1	hf1_10472_ebo_22_1_261219.ScanId;v=1;d1=22115.22115.4	controllerType=0 controllerNumber=1 scan=22115	47.0114
29754:4	1	S.MPLPP[+15.995]HPGHPGYINFS[+79.966]YEVLTPLK.W		P[+16], S[+80]	700.847	4	2800.37	2800.36	0	4	17	NRagged	688.38	688.38	0	10.12	1032	>sp|P02817|AMELX_BOVIN Amelogenin, X isoform OS=Bos taurus OX=9913 GN=AMELX PE=1 SV=2	1	hf1_10472_ebo_22_1_261219.ScanId;v=1;d1=22311.22311.4	controllerType=0 controllerNumber=1 scan=22311	47.3538
30779:4	1	S.MPLPPHPGHPGYIN[+0.984]FS[+79.966]YEVLTPLK.W		N[+1], S[+80]	697.096	4	2785.36	2785.35	0	6.2	17	NRagged	698.06	698.06	379.03	10.82	1032	>sp|P02817|AMELX_BOVIN Amelogenin, X isoform OS=Bos taurus OX=9913 GN=AMELX PE=1 SV=2	1	hf1_10472_ebo_22_1_261219.ScanId;v=1;d1=23019.23019.4	controllerType=0 controllerNumber=1 scan=23019	48.5974
28585:4	1	S.M[+15.995]PLPPHPGHPGYINFS[+79.966]YEVLTPLK.W		M[+16], S[+80]	700.85	4	2800.38	2800.36	0	7.5	17	NRagged	702.82	702.82	7.45	11.82	1032	>sp|P02817|AMELX_BOVIN Amelogenin, X isoform OS=Bos taurus OX=9913 GN=AMELX PE=1 SV=2	1	hf1_10472_ebo_22_1_261219.ScanId;v=1;d1=21513.21513.4	controllerType=0 controllerNumber=1 scan=21513	45.96
28294:4	1	S.M[+15.995]PLPPHPGHPGYINFS[+79.966]YEVLTPLK.W		M[+16], S[+80]	700.849	4	2800.38	2800.36	0	6.7	17	NRagged	706.44	706.44	7.25	11.82	1032	>sp|P02817|AMELX_BOVIN Amelogenin, X isoform OS=Bos taurus OX=9913 GN=AMELX PE=1 SV=2	1	hf1_10472_ebo_22_1_261219.ScanId;v=1;d1=21318.21318.4	controllerType=0 controllerNumber=1 scan=21318	45.6185
28022:4	1	S.MP[+15.995]LPPHPGHPGYINFS[+79.966]YEVLTPLK.W		P[+16], S[+80]	700.848	4	2800.37	2800.36	0	5.3	17	NRagged	717.71	717.71	4	11.55	1032	>sp|P02817|AMELX_BOVIN Amelogenin, X isoform OS=Bos taurus OX=9913 GN=AMELX PE=1 SV=2	1	hf1_10472_ebo_22_1_261219.ScanId;v=1;d1=21120.21120.4	controllerType=0 controllerNumber=1 scan=21120	45.2699
30489:4	1	S.MPLPPHPGHPGYIN[+0.984]FS[+79.966]YEVLTPLK.W		N[+1], S[+80]	697.097	4	2785.37	2785.35	0	7.4	17	NRagged	723.56	723.56	375.57	11.82	1032	>sp|P02817|AMELX_BOVIN Amelogenin, X isoform OS=Bos taurus OX=9913 GN=AMELX PE=1 SV=2	1	hf1_10472_ebo_22_1_261219.ScanId;v=1;d1=22816.22816.4	controllerType=0 controllerNumber=1 scan=22816	48.2383
28764:3	1	S.M[+31.990]PLPPHPGHPGYINFS[+79.966]YEVLTPLK.W		M[+32], S[+80]	939.459	3	2816.36	2816.35	0	4.1	17	NRagged	744.1	744.1	0	11.12	1032	>sp|P02817|AMELX_BOVIN Amelogenin, X isoform OS=Bos taurus OX=9913 GN=AMELX PE=1 SV=2	1	hf1_10472_ebo_22_1_261219.ScanId;v=1;d1=21640.21640.3	controllerType=0 controllerNumber=1 scan=21640	46.1811
29061:3	1	S.MP[+31.990]LPPHPGHPGYINFS[+79.966]YEVLTPLK.W		P[+32], S[+80]	939.461	3	2816.37	2816.35	0	5.9	17	NRagged	760.65	760.65	13	12.55	1032	>sp|P02817|AMELX_BOVIN Amelogenin, X isoform OS=Bos taurus OX=9913 GN=AMELX PE=1 SV=2	1	hf1_10472_ebo_22_1_261219.ScanId;v=1;d1=21843.21843.3	controllerType=0 controllerNumber=1 scan=21843	46.5349
27820:2	1	S.M[+15.995]PLPPHPGHPGYINFS[+79.966]YEVLTPLK.W		M[+16], S[+80]	1400.69	2	2800.38	2800.36	0	6.8	17	NRagged	817.22	817.22	44.61	12.92	1032	>sp|P02817|AMELX_BOVIN Amelogenin, X isoform OS=Bos taurus OX=9913 GN=AMELX PE=1 SV=2	1	hf1_10472_ebo_22_1_261219.ScanId;v=1;d1=20978.20978.2	controllerType=0 controllerNumber=1 scan=20978	45.0201
30351:3	1	S.M[+15.995]PLPPHPGHPGYINFS[+79.966]YEVLTPLK.W		M[+16], S[+80]	934.127	3	2800.37	2800.36	0	3	17	NRagged	860.43	860.43	19.48	14.12	1032	>sp|P02817|AMELX_BOVIN Amelogenin, X isoform OS=Bos taurus OX=9913 GN=AMELX PE=1 SV=2	1	hf1_10472_ebo_22_1_261219.ScanId;v=1;d1=22722.22722.3	controllerType=0 controllerNumber=1 scan=22722	48.0751
30061:3	1	S.M[+15.995]PLPPHPGHPGYINFS[+79.966]YEVLTPLK.W		M[+16], S[+80]	934.127	3	2800.37	2800.36	0	3.1	17	NRagged	868.69	868.69	20.96	14.12	1032	>sp|P02817|AMELX_BOVIN Amelogenin, X isoform OS=Bos taurus OX=9913 GN=AMELX PE=1 SV=2	1	hf1_10472_ebo_22_1_261219.ScanId;v=1;d1=22522.22522.3	controllerType=0 controllerNumber=1 scan=22522	47.7237
28358:2	1	S.M[+15.995]PLPPHPGHPGYINFS[+79.966]YEVLTPLK.W		M[+16], S[+80]	1400.69	2	2800.38	2800.36	0	7.8	17	NRagged	868.75	868.75	60.3	13.92	1032	>sp|P02817|AMELX_BOVIN Amelogenin, X isoform OS=Bos taurus OX=9913 GN=AMELX PE=1 SV=2	1	hf1_10472_ebo_22_1_261219.ScanId;v=1;d1=21367.21367.2	controllerType=0 controllerNumber=1 scan=21367	45.7055
28093:2	1	S.M[+15.995]PLPPHPGHPGYINFS[+79.966]YEVLTPLK.W		M[+16], S[+80]	1400.69	2	2800.38	2800.36	0	7.2	17	NRagged	882.89	882.89	54.24	13.92	1032	>sp|P02817|AMELX_BOVIN Amelogenin, X isoform OS=Bos taurus OX=9913 GN=AMELX PE=1 SV=2	1	hf1_10472_ebo_22_1_261219.ScanId;v=1;d1=21175.21175.2	controllerType=0 controllerNumber=1 scan=21175	45.3641
29477:3	1	S.M[+15.995]PLPPHPGHPGYINFS[+79.966]YEVLTPLK.W		M[+16], S[+80]	934.128	3	2800.37	2800.36	0	4.3	17	NRagged	900.67	900.67	33.87	15.55	1032	>sp|P02817|AMELX_BOVIN Amelogenin, X isoform OS=Bos taurus OX=9913 GN=AMELX PE=1 SV=2	1	hf1_10472_ebo_22_1_261219.ScanId;v=1;d1=22124.22124.3	controllerType=0 controllerNumber=1 scan=22124	47.0278
00106:3	1	S.M[+15.995]PLPPHPGHPGYINFS[+79.966]YEVLTPLK.W		M[+16], S[+80]	934.13	3	2800.38	2800.36	0	6.9	17	NRagged	923.81	923.81	42.85	15.82	1032	>sp|P02817|AMELX_BOVIN Amelogenin, X isoform OS=Bos taurus OX=9913 GN=AMELX PE=1 SV=2	1	hf1_10472_ebo_22_1_261219.ScanId;v=1;d1=124.124.3	controllerType=0 controllerNumber=1 scan=124	0.3939
31112:3	1	S.MPLPPHPGHPGYIN[+0.984]FS[+79.966]YEVLTPLK.W		N[+1], S[+80]	929.127	3	2785.37	2785.35	0	7.3	17	NRagged	994.05	994.05	470.69	16.82	1032	>sp|P02817|AMELX_BOVIN Amelogenin, X isoform OS=Bos taurus OX=9913 GN=AMELX PE=1 SV=2	1	hf1_10472_ebo_22_1_261219.ScanId;v=1;d1=23250.23250.3	controllerType=0 controllerNumber=1 scan=23250	49.0043
46099:3	1	S.M[+15.995]PLPPHPGHPGYINFS[+79.966]YEVLTPLK.W		M[+16], S[+80]	934.131	3	2800.38	2800.36	0	8.1	17	NRagged	1042.61	1042.61	47.53	17.02	1032	>sp|P02817|AMELX_BOVIN Amelogenin, X isoform OS=Bos taurus OX=9913 GN=AMELX PE=1 SV=2	1	hf1_10472_ebo_22_1_261219.ScanId;v=1;d1=34386.34386.3	controllerType=0 controllerNumber=1 scan=34386	73.5832
29769:3	1	S.M[+15.995]PLPPHPGHPGYINFS[+79.966]YEVLTPLK.W		M[+16], S[+80]	934.128	3	2800.37	2800.36	0	4.3	17	NRagged	1050.49	1050.49	13.52	18.12	1032	>sp|P02817|AMELX_BOVIN Amelogenin, X isoform OS=Bos taurus OX=9913 GN=AMELX PE=1 SV=2	1	hf1_10472_ebo_22_1_261219.ScanId;v=1;d1=22322.22322.3	controllerType=0 controllerNumber=1 scan=22322	47.3733
28310:3	1	S.M[+15.995]PLPPHPGHPGYINFS[+79.966]YEVLTPLK.W		M[+16], S[+80]	934.13	3	2800.38	2800.36	0	6.6	17	NRagged	1055.05	1055.05	59.85	18.82	1032	>sp|P02817|AMELX_BOVIN Amelogenin, X isoform OS=Bos taurus OX=9913 GN=AMELX PE=1 SV=2	1	hf1_10472_ebo_22_1_261219.ScanId;v=1;d1=21329.21329.3	controllerType=0 controllerNumber=1 scan=21329	45.6377
28601:3	1	S.M[+15.995]PLPPHPGHPGYINFS[+79.966]YEVLTPLK.W		M[+16], S[+80]	934.13	3	2800.38	2800.36	0	7	17	NRagged	1094.91	1094.91	44.06	18.82	1032	>sp|P02817|AMELX_BOVIN Amelogenin, X isoform OS=Bos taurus OX=9913 GN=AMELX PE=1 SV=2	1	hf1_10472_ebo_22_1_261219.ScanId;v=1;d1=21524.21524.3	controllerType=0 controllerNumber=1 scan=21524	45.9794
28038:3	1	S.M[+15.995]PLPPHPGHPGYINFS[+79.966]YEVLTPLK.W		M[+16], S[+80]	934.129	3	2800.37	2800.36	0	5.6	17	NRagged	1114.14	1114.14	65.45	19.55	1032	>sp|P02817|AMELX_BOVIN Amelogenin, X isoform OS=Bos taurus OX=9913 GN=AMELX PE=1 SV=2	1	hf1_10472_ebo_22_1_261219.ScanId;v=1;d1=21131.21131.3	controllerType=0 controllerNumber=1 scan=21131	45.2892
30549:3	1	S.MPLPPHPGHPGYIN[+0.984]FS[+79.966]YEVLTPLK.W		N[+1], S[+80]	929.126	3	2785.36	2785.35	0	6.6	17	NRagged	1120.94	1120.94	509.1	19.82	1032	>sp|P02817|AMELX_BOVIN Amelogenin, X isoform OS=Bos taurus OX=9913 GN=AMELX PE=1 SV=2	1	hf1_10472_ebo_22_1_261219.ScanId;v=1;d1=22859.22859.3	controllerType=0 controllerNumber=1 scan=22859	48.3135
30826:3	1	S.MPLPPHPGHPGYIN[+0.984]FS[+79.966]YEVLTPLK.W		N[+1], S[+80]	929.127	3	2785.37	2785.35	0	7.3	17	NRagged	1142.14	1142.14	550.06	19.82	1032	>sp|P02817|AMELX_BOVIN Amelogenin, X isoform OS=Bos taurus OX=9913 GN=AMELX PE=1 SV=2	1	hf1_10472_ebo_22_1_261219.ScanId;v=1;d1=23052.23052.3	controllerType=0 controllerNumber=1 scan=23052	48.6556
44592:4	1	S.MPLP[+15.995]PHPGHPGY[+31.990]INF[+31.990]SYEVLTPLK.W		F[+32], P[+16], Y[+32]	696.849	4	2784.38	2784.37	0	2.1	17	NRagged	5.65	5.65	0	1.76	1032	>sp|P02817|AMELX_BOVIN Amelogenin, X isoform OS=Bos taurus OX=9913 GN=AMELX PE=1 SV=2	1	hf1_10472_ebo_22_1_261219.ScanId;v=1;d1=32408.32408.4	controllerType=0 controllerNumber=1 scan=32408	66.1216
39183:4	1	S.MPLP[+15.995]PHPGHPGY[+31.990]INF[+31.990]SYEVLTPLK.W		F[+32], P[+16], Y[+32]	696.85	4	2784.38	2784.37	0	3	17	NRagged	7.41	7.41	0	2.12	1032	>sp|P02817|AMELX_BOVIN Amelogenin, X isoform OS=Bos taurus OX=9913 GN=AMELX PE=1 SV=2	1	hf1_10472_ebo_22_1_261219.ScanId;v=1;d1=28599.28599.4	controllerType=0 controllerNumber=1 scan=28599	58.5256
43847:4	1	S.MPLP[+15.995]PHPGHP[+31.990]GYINF[+31.990]SYEVLTPLK.W		F[+32], P[+16][+32]	696.851	4	2784.38	2784.37	0	5	17	NRagged	18.28	18.28	0	2.16	1032	>sp|P02817|AMELX_BOVIN Amelogenin, X isoform OS=Bos taurus OX=9913 GN=AMELX PE=1 SV=2	1	hf1_10472_ebo_22_1_261219.ScanId;v=1;d1=31766.31766.4	controllerType=0 controllerNumber=1 scan=31766	64.4218
40126:4	1	S.MPLP[+15.995]PHPGHPGY[+31.990]INF[+31.990]SYEVLTPLK.W		F[+32], P[+16], Y[+32]	696.851	4	2784.38	2784.37	0	3.7	17	NRagged	26.97	26.97	0	2.21	1032	>sp|P02817|AMELX_BOVIN Amelogenin, X isoform OS=Bos taurus OX=9913 GN=AMELX PE=1 SV=2	1	hf1_10472_ebo_22_1_261219.ScanId;v=1;d1=29226.29226.4	controllerType=0 controllerNumber=1 scan=29226	59.6462
42059:4	1	S.MPLPPHPGHP[+31.990]GY[+31.990]INF[+15.995]SYEVLTPLK.W		F[+16], P[+32], Y[+32]	696.851	4	2784.38	2784.37	0	3.7	17	NRagged	38.16	38.16	0	2.12	1032	>sp|P02817|AMELX_BOVIN Amelogenin, X isoform OS=Bos taurus OX=9913 GN=AMELX PE=1 SV=2	1	hf1_10472_ebo_22_1_261219.ScanId;v=1;d1=30516.30516.4	controllerType=0 controllerNumber=1 scan=30516	61.9933
40639:4	1	S.MPLPPHPGHPGY[+31.990]INF[+31.990]SY[+15.995]EVLTPLK.W		F[+32], Y[+16][+32]	696.851	4	2784.38	2784.37	0	3.7	17	NRagged	41.74	41.74	1.5	2.16	1032	>sp|P02817|AMELX_BOVIN Amelogenin, X isoform OS=Bos taurus OX=9913 GN=AMELX PE=1 SV=2	1	hf1_10472_ebo_22_1_261219.ScanId;v=1;d1=29560.29560.4	controllerType=0 controllerNumber=1 scan=29560	60.2449
44336:4	1	S.MPLP[+15.995]PHPGHPGY[+31.990]INF[+31.990]SYEVLTPLK.W		F[+32], P[+16], Y[+32]	696.85	4	2784.38	2784.37	0	2.4	17	NRagged	42.08	42.08	0	2.39	1032	>sp|P02817|AMELX_BOVIN Amelogenin, X isoform OS=Bos taurus OX=9913 GN=AMELX PE=1 SV=2	1	hf1_10472_ebo_22_1_261219.ScanId;v=1;d1=32170.32170.4	controllerType=0 controllerNumber=1 scan=32170	65.444
42596:4	1	S.MPLPPHPGHP[+31.990]GYINF[+31.990]SY[+15.995]EVLTPLK.W		F[+32], P[+32], Y[+16]	696.849	4	2784.38	2784.37	0	2.1	17	NRagged	45.51	45.51	0	2.12	1032	>sp|P02817|AMELX_BOVIN Amelogenin, X isoform OS=Bos taurus OX=9913 GN=AMELX PE=1 SV=2	1	hf1_10472_ebo_22_1_261219.ScanId;v=1;d1=30887.30887.4	controllerType=0 controllerNumber=1 scan=30887	62.6928
41788:4	1	S.MPLPPHPGHPGY[+31.990]INF[+31.990]SY[+15.995]EVLTPLK.W		F[+32], Y[+16][+32]	696.852	4	2784.39	2784.37	0	5.9	17	NRagged	45.63	45.63	1.5	2.65	1032	>sp|P02817|AMELX_BOVIN Amelogenin, X isoform OS=Bos taurus OX=9913 GN=AMELX PE=1 SV=2	1	hf1_10472_ebo_22_1_261219.ScanId;v=1;d1=30331.30331.4	controllerType=0 controllerNumber=1 scan=30331	61.6441
40935:4	1	S.MPLP[+15.995]PHPGHP[+31.990]GYINF[+31.990]SYEVLTPLK.W		F[+32], P[+16][+32]	696.851	4	2784.38	2784.37	0	4	17	NRagged	60.65	60.65	0	2.16	1032	>sp|P02817|AMELX_BOVIN Amelogenin, X isoform OS=Bos taurus OX=9913 GN=AMELX PE=1 SV=2	1	hf1_10472_ebo_22_1_261219.ScanId;v=1;d1=29759.29759.4	controllerType=0 controllerNumber=1 scan=29759	60.6002
41510:4	1	S.MPLP[+15.995]P[+31.990]HPGHPGYINF[+31.990]SYEVLTPLK.W		F[+32], P[+16][+32]	696.85	4	2784.38	2784.37	0	3.5	17	NRagged	66.35	66.35	0	2.16	1032	>sp|P02817|AMELX_BOVIN Amelogenin, X isoform OS=Bos taurus OX=9913 GN=AMELX PE=1 SV=2	1	hf1_10472_ebo_22_1_261219.ScanId;v=1;d1=30144.30144.4	controllerType=0 controllerNumber=1 scan=30144	61.2957
44216:4	1	S.MPLP[+15.995]PHPGHP[+31.990]GYINF[+31.990]SYEVLTPLK.W		F[+32], P[+16][+32]	696.85	4	2784.38	2784.37	0	2.5	17	NRagged	68.33	68.33	0	2.39	1032	>sp|P02817|AMELX_BOVIN Amelogenin, X isoform OS=Bos taurus OX=9913 GN=AMELX PE=1 SV=2	1	hf1_10472_ebo_22_1_261219.ScanId;v=1;d1=32059.32059.4	controllerType=0 controllerNumber=1 scan=32059	65.1077
44050:4	1	S.MPLP[+15.995]PHPGHP[+31.990]GYINF[+31.990]SYEVLTPLK.W		F[+32], P[+16][+32]	696.85	4	2784.38	2784.37	0	2.9	17	NRagged	68.34	68.34	0	2.39	1032	>sp|P02817|AMELX_BOVIN Amelogenin, X isoform OS=Bos taurus OX=9913 GN=AMELX PE=1 SV=2	1	hf1_10472_ebo_22_1_261219.ScanId;v=1;d1=31922.31922.4	controllerType=0 controllerNumber=1 scan=31922	64.7673
42347:4	1	S.MPLPP[+15.995]HPGHPGY[+31.990]INF[+31.990]SYEVLTPLK.W		F[+32], P[+16], Y[+32]	696.85	4	2784.38	2784.37	0	2.7	17	NRagged	73.04	73.04	0	2.39	1032	>sp|P02817|AMELX_BOVIN Amelogenin, X isoform OS=Bos taurus OX=9913 GN=AMELX PE=1 SV=2	1	hf1_10472_ebo_22_1_261219.ScanId;v=1;d1=30708.30708.4	controllerType=0 controllerNumber=1 scan=30708	62.3483
44465:4	1	S.MPLP[+15.995]PHPGHPGY[+31.990]INF[+31.990]SYEVLTPLK.W		F[+32], P[+16], Y[+32]	696.848	4	2784.37	2784.37	0	-0.5	17	NRagged	73.74	73.74	0	2.25	1032	>sp|P02817|AMELX_BOVIN Amelogenin, X isoform OS=Bos taurus OX=9913 GN=AMELX PE=1 SV=2	1	hf1_10472_ebo_22_1_261219.ScanId;v=1;d1=32290.32290.4	controllerType=0 controllerNumber=1 scan=32290	65.7842
42956:4	1	S.MPLPPHPGHP[+31.990]GY[+15.995]INF[+31.990]SYEVLTPLK.W		F[+32], P[+32], Y[+16]	696.852	4	2784.39	2784.37	0	5.7	17	NRagged	77.52	77.52	0	2.26	1032	>sp|P02817|AMELX_BOVIN Amelogenin, X isoform OS=Bos taurus OX=9913 GN=AMELX PE=1 SV=2	1	hf1_10472_ebo_22_1_261219.ScanId;v=1;d1=31146.31146.3	controllerType=0 controllerNumber=1 scan=31146	63.2034
40611:3	1	S.MPLPPHPGHP[+31.990]GY[+31.990]INFSY[+15.995]EVLTPLK.W		P[+32], Y[+16][+32]	928.799	3	2784.38	2784.37	0	4.5	17	NRagged	85.46	85.46	0	2.65	1032	>sp|P02817|AMELX_BOVIN Amelogenin, X isoform OS=Bos taurus OX=9913 GN=AMELX PE=1 SV=2	1	hf1_10472_ebo_22_1_261219.ScanId;v=1;d1=29542.29542.3	controllerType=0 controllerNumber=1 scan=29542	60.2117
38886:4	1	S.MPLP[+15.995]P[+31.990]HPGHPGYINF[+31.990]SYEVLTPLK.W		F[+32], P[+16][+32]	696.851	4	2784.38	2784.37	0	4.7	17	NRagged	86.53	86.53	0	2.65	1032	>sp|P02817|AMELX_BOVIN Amelogenin, X isoform OS=Bos taurus OX=9913 GN=AMELX PE=1 SV=2	1	hf1_10472_ebo_22_1_261219.ScanId;v=1;d1=28401.28401.4	controllerType=0 controllerNumber=1 scan=28401	58.1721
41225:4	1	S.MPLP[+15.995]P[+31.990]HPGHPGYINF[+31.990]SYEVLTPLK.W		F[+32], P[+16][+32]	696.851	4	2784.38	2784.37	0	4.5	17	NRagged	110.75	110.75	0	2.26	1032	>sp|P02817|AMELX_BOVIN Amelogenin, X isoform OS=Bos taurus OX=9913 GN=AMELX PE=1 SV=2	1	hf1_10472_ebo_22_1_261219.ScanId;v=1;d1=29953.29953.4	controllerType=0 controllerNumber=1 scan=29953	60.9516
26657:3	1	S.MP[+15.995]LPPHPGHPGYINFS[+79.966]Y[+15.995]EVLTPLK.W		P[+16], S[+80], Y[+16]	939.461	3	2816.37	2816.35	0	5.4	17	NRagged	116.25	116.25	4	2.26	1032	>sp|P02817|AMELX_BOVIN Amelogenin, X isoform OS=Bos taurus OX=9913 GN=AMELX PE=1 SV=2	1	hf1_10472_ebo_22_1_261219.ScanId;v=1;d1=20189.20189.4	controllerType=0 controllerNumber=1 scan=20189	43.6495
32130:4	1	S.MPLPPHPGHPGY[+31.990]INF[+31.990]SY[+15.995]EVLTPLK.W		F[+32], Y[+16][+32]	696.849	4	2784.38	2784.37	0	2.1	17	NRagged	125.92	125.92	1.5	2.15	1032	>sp|P02817|AMELX_BOVIN Amelogenin, X isoform OS=Bos taurus OX=9913 GN=AMELX PE=1 SV=2	1	hf1_10472_ebo_22_1_261219.ScanId;v=1;d1=23924.23924.4	controllerType=0 controllerNumber=1 scan=23924	50.1932
42850:4	1	S.MPLPPHP[+15.995]GHP[+31.990]GYINF[+31.990]SYEVLTPLK.W		F[+32], P[+16][+32]	696.85	4	2784.38	2784.37	0	2.9	17	NRagged	137.38	137.38	0	2.81	1032	>sp|P02817|AMELX_BOVIN Amelogenin, X isoform OS=Bos taurus OX=9913 GN=AMELX PE=1 SV=2	1	hf1_10472_ebo_22_1_261219.ScanId;v=1;d1=31068.31068.4	controllerType=0 controllerNumber=1 scan=31068	63.0409
43600:4	1	S.MPLP[+15.995]P[+31.990]HPGHPGYINF[+31.990]SYEVLTPLK.W		F[+32], P[+16][+32]	696.849	4	2784.38	2784.37	0	1.7	17	NRagged	145.91	145.91	0	2.47	1032	>sp|P02817|AMELX_BOVIN Amelogenin, X isoform OS=Bos taurus OX=9913 GN=AMELX PE=1 SV=2	1	hf1_10472_ebo_22_1_261219.ScanId;v=1;d1=31588.31588.4	controllerType=0 controllerNumber=1 scan=31588	64.0811
43310:4	1	S.MPLP[+15.995]P[+31.990]HPGHPGYINF[+31.990]SYEVLTPLK.W		F[+32], P[+16][+32]	696.85	4	2784.38	2784.37	0	3.3	17	NRagged	147.66	147.66	0	2.81	1032	>sp|P02817|AMELX_BOVIN Amelogenin, X isoform OS=Bos taurus OX=9913 GN=AMELX PE=1 SV=2	1	hf1_10472_ebo_22_1_261219.ScanId;v=1;d1=31395.31395.4	controllerType=0 controllerNumber=1 scan=31395	63.7312
39730:3	1	S.MPLPPHPGHP[+31.990]GY[+31.990]INF[+15.995]SYEVLTPLK.W		F[+16], P[+32], Y[+32]	928.797	3	2784.38	2784.37	0	2.3	17	NRagged	151.85	151.85	0	2.63	1032	>sp|P02817|AMELX_BOVIN Amelogenin, X isoform OS=Bos taurus OX=9913 GN=AMELX PE=1 SV=2	1	hf1_10472_ebo_22_1_261219.ScanId;v=1;d1=28960.28960.3	controllerType=0 controllerNumber=1 scan=28960	59.1707
43047:4	1	S.MPLPP[+31.990]H[+15.995]PGHPGYINF[+31.990]SYEVLTPLK.W		F[+32], H[+16], P[+32]	696.851	4	2784.38	2784.37	0	4.5	17	NRagged	163.29	163.29	3.5	4	1032	>sp|P02817|AMELX_BOVIN Amelogenin, X isoform OS=Bos taurus OX=9913 GN=AMELX PE=1 SV=2	1	hf1_10472_ebo_22_1_261219.ScanId;v=1;d1=31221.31221.4	controllerType=0 controllerNumber=1 scan=31221	63.3821
00123:3	1	S.MP[+15.995]LPPHPGHPGYINFS[+79.966]Y[+31.990]EVLTPLK.W		P[+16], S[+80], Y[+32]	944.789	3	2832.35	2832.35	0	2.1	17	NRagged	168.85	168.85	0	3.11	1032	>sp|P02817|AMELX_BOVIN Amelogenin, X isoform OS=Bos taurus OX=9913 GN=AMELX PE=1 SV=2	1	hf1_10472_ebo_22_1_261219.ScanId;v=1;d1=136.136.3	controllerType=0 controllerNumber=1 scan=136	0.4148
29725:5	1	S.MPLPP[+15.995]HPGHP[+31.990]GYINFSY[+31.990]EVLTPLK.W		P[+16][+32], Y[+32]	557.682	5	2784.38	2784.37	0	3.5	17	NRagged	198.27	198.27	0	2.91	1032	>sp|P02817|AMELX_BOVIN Amelogenin, X isoform OS=Bos taurus OX=9913 GN=AMELX PE=1 SV=2	1	hf1_10472_ebo_22_1_261219.ScanId;v=1;d1=22293.22293.5	controllerType=0 controllerNumber=1 scan=22293	47.321
30012:5	1	S.MPLPPHPGHP[+31.990]GYINF[+15.995]SY[+31.990]EVLTPLK.W		F[+16], P[+32], Y[+32]	557.682	5	2784.38	2784.37	0	3.1	17	NRagged	218.35	218.35	0	3.18	1032	>sp|P02817|AMELX_BOVIN Amelogenin, X isoform OS=Bos taurus OX=9913 GN=AMELX PE=1 SV=2	1	hf1_10472_ebo_22_1_261219.ScanId;v=1;d1=22489.22489.5	controllerType=0 controllerNumber=1 scan=22489	47.6658
28258:4	1	S.MP[+31.990]LPPHPGHPGYIN[+0.984]FS[+79.966]YEVLTPLK.W		N[+1], P[+32], S[+80]	705.095	4	2817.36	2817.34	0	7.4	17	NRagged	294.24	294.24	1.8	5.68	1032	>sp|P02817|AMELX_BOVIN Amelogenin, X isoform OS=Bos taurus OX=9913 GN=AMELX PE=1 SV=2	1	hf1_10472_ebo_22_1_261219.ScanId;v=1;d1=21294.21294.4	controllerType=0 controllerNumber=1 scan=21294	45.5742
46113:4	1	S.MP[+15.995]LPPHPGHPGY[+15.995]INFS[+79.966]YEVLTPLK.W		P[+16], S[+80], Y[+16]	704.85	4	2816.38	2816.35	0	8.9	17	NRagged	298.88	298.88	2	5.92	1032	>sp|P02817|AMELX_BOVIN Amelogenin, X isoform OS=Bos taurus OX=9913 GN=AMELX PE=1 SV=2	1	hf1_10472_ebo_22_1_261219.ScanId;v=1;d1=34398.34398.4	controllerType=0 controllerNumber=1 scan=34398	73.6043
29671:2	1	S.MPLPPHPGHP[+31.990]GY[+15.995]INF[+31.990]SYEVLTPLK.W		F[+32], P[+32], Y[+16]	1392.7	2	2784.4	2784.37	0	9.6	17	NRagged	475.56	475.56	0	5.24	1032	>sp|P02817|AMELX_BOVIN Amelogenin, X isoform OS=Bos taurus OX=9913 GN=AMELX PE=1 SV=2	1	hf1_10472_ebo_22_1_261219.ScanId;v=1;d1=22254.22254.2	controllerType=0 controllerNumber=1 scan=22254	47.2512
27983:4	1	S.M[+15.995]PLPPHPGHPGY[+15.995]INFS[+79.966]YEVLTPLK.W		M[+16], S[+80], Y[+16]	704.845	4	2816.36	2816.35	0	2.4	17	NRagged	545.38	545.38	4.4	7.38	1032	>sp|P02817|AMELX_BOVIN Amelogenin, X isoform OS=Bos taurus OX=9913 GN=AMELX PE=1 SV=2	1	hf1_10472_ebo_22_1_261219.ScanId;v=1;d1=21094.21094.4	controllerType=0 controllerNumber=1 scan=21094	45.2231
28345:3	1	S.M[+15.995]PLPPHPGHPGY[+15.995]INFS[+79.966]YEVLTPLK.W		M[+16], S[+80], Y[+16]	939.459	3	2816.36	2816.35	0	3.7	17	NRagged	559.36	559.36	11.67	6.51	1032	>sp|P02817|AMELX_BOVIN Amelogenin, X isoform OS=Bos taurus OX=9913 GN=AMELX PE=1 SV=2	1	hf1_10472_ebo_22_1_261219.ScanId;v=1;d1=21357.21357.3	controllerType=0 controllerNumber=1 scan=21357	45.6875
28470:3	1	S.M[+15.995]PLPPHP[+15.995]GHPGYINFS[+79.966]YEVLTPLK.W		M[+16], P[+16], S[+80]	939.458	3	2816.36	2816.35	0	3.2	17	NRagged	568.76	568.76	5.37	7.47	1032	>sp|P02817|AMELX_BOVIN Amelogenin, X isoform OS=Bos taurus OX=9913 GN=AMELX PE=1 SV=2	1	hf1_10472_ebo_22_1_261219.ScanId;v=1;d1=21440.21440.3	controllerType=0 controllerNumber=1 scan=21440	45.8319
00120:3	1	S.M[+15.995]PLPPHPGHP[+15.995]GYINFS[+79.966]YEVLTPLK.W		M[+16], P[+16], S[+80]	939.458	3	2816.36	2816.35	0	2.4	17	NRagged	626.61	626.61	0	9.12	1032	>sp|P02817|AMELX_BOVIN Amelogenin, X isoform OS=Bos taurus OX=9913 GN=AMELX PE=1 SV=2	1	hf1_10472_ebo_22_1_261219.ScanId;v=1;d1=134.134.3	controllerType=0 controllerNumber=1 scan=134	0.4118
27391:4	1	S.M[+15.995]PLPPHPGHPGY[+15.995]INFS[+79.966]YEVLTPLK.W		M[+16], S[+80], Y[+16]	704.848	4	2816.37	2816.35	0	6.4	17	NRagged	665.84	665.84	0	10.82	1032	>sp|P02817|AMELX_BOVIN Amelogenin, X isoform OS=Bos taurus OX=9913 GN=AMELX PE=1 SV=2	1	hf1_10472_ebo_22_1_261219.ScanId;v=1;d1=20692.20692.4	controllerType=0 controllerNumber=1 scan=20692	44.5277
27697:4	1	S.M[+15.995]PLPPHPGHP[+15.995]GYINFS[+79.966]YEVLTPLK.W		M[+16], P[+16], S[+80]	704.848	4	2816.37	2816.35	0	6.3	17	NRagged	690.14	690.14	7.02	10.82	1032	>sp|P02817|AMELX_BOVIN Amelogenin, X isoform OS=Bos taurus OX=9913 GN=AMELX PE=1 SV=2	1	hf1_10472_ebo_22_1_261219.ScanId;v=1;d1=20897.20897.4	controllerType=0 controllerNumber=1 scan=20897	44.8838
28878:4	1	S.MP[+15.995]LPPHPGHPGYIN[+0.984]FS[+79.966]YEVLTPLK.W		N[+1], P[+16], S[+80]	701.097	4	2801.36	2801.34	0	8.5	17	NRagged	698.91	674.55	4	10.01	1032	>sp|P02817|AMELX_BOVIN Amelogenin, X isoform OS=Bos taurus OX=9913 GN=AMELX PE=1 SV=2	1	hf1_10472_ebo_22_1_261219.ScanId;v=1;d1=21717.21717.4	controllerType=0 controllerNumber=1 scan=21717	46.316
29166:4	1	S.MP[+15.995]LPPHPGHPGYIN[+0.984]FS[+79.966]YEVLTPLK.W		N[+1], P[+16], S[+80]	701.097	4	2801.36	2801.34	0	8.4	17	NRagged	727.5	702.02	5.8	11.01	1032	>sp|P02817|AMELX_BOVIN Amelogenin, X isoform OS=Bos taurus OX=9913 GN=AMELX PE=1 SV=2	1	hf1_10472_ebo_22_1_261219.ScanId;v=1;d1=21915.21915.4	controllerType=0 controllerNumber=1 scan=21915	46.6629
27800:3	1	S.M[+15.995]PLPPHPGH[+15.995]PGYINFS[+79.966]YEVLTPLK.W		H[+16], M[+16], S[+80]	939.461	3	2816.37	2816.35	0	5.5	17	NRagged	914.99	914.99	0	15.55	1032	>sp|P02817|AMELX_BOVIN Amelogenin, X isoform OS=Bos taurus OX=9913 GN=AMELX PE=1 SV=2	1	hf1_10472_ebo_22_1_261219.ScanId;v=1;d1=20964.20964.3	controllerType=0 controllerNumber=1 scan=20964	44.9969
27495:3	1	S.M[+15.995]PLPPHPGHP[+15.995]GYINFS[+79.966]YEVLTPLK.W		M[+16], P[+16], S[+80]	939.461	3	2816.37	2816.35	0	6.3	17	NRagged	948.38	948.38	7.9	15.82	1032	>sp|P02817|AMELX_BOVIN Amelogenin, X isoform OS=Bos taurus OX=9913 GN=AMELX PE=1 SV=2	1	hf1_10472_ebo_22_1_261219.ScanId;v=1;d1=20758.20758.3	controllerType=0 controllerNumber=1 scan=20758	44.6416
27754:3	1	S.M[+15.995]PLPPHPGHPGYIN[+0.984]FS[+79.966]YEVLTPLK.W		M[+16], N[+1], S[+80]	934.459	3	2801.36	2801.34	0	7.6	17	NRagged	1043.85	1022.29	44.23	17.82	1032	>sp|P02817|AMELX_BOVIN Amelogenin, X isoform OS=Bos taurus OX=9913 GN=AMELX PE=1 SV=2	1	hf1_10472_ebo_22_1_261219.ScanId;v=1;d1=20934.20934.3	controllerType=0 controllerNumber=1 scan=20934	44.9448
28893:3	1	S.M[+15.995]PLPPHPGHPGYIN[+0.984]FS[+79.966]YEVLTPLK.W		M[+16], N[+1], S[+80]	934.459	3	2801.36	2801.34	0	7.9	17	NRagged	1078.26	1078.26	61.53	18.82	1032	>sp|P02817|AMELX_BOVIN Amelogenin, X isoform OS=Bos taurus OX=9913 GN=AMELX PE=1 SV=2	1	hf1_10472_ebo_22_1_261219.ScanId;v=1;d1=21728.21728.3	controllerType=0 controllerNumber=1 scan=21728	46.3354
29181:3	1	S.M[+15.995]PLPPHPGHPGYIN[+0.984]FS[+79.966]YEVLTPLK.W		M[+16], N[+1], S[+80]	934.459	3	2801.36	2801.34	0	8.2	17	NRagged	1126.87	1111.35	43.24	19.02	1032	>sp|P02817|AMELX_BOVIN Amelogenin, X isoform OS=Bos taurus OX=9913 GN=AMELX PE=1 SV=2	1	hf1_10472_ebo_22_1_261219.ScanId;v=1;d1=21926.21926.3	controllerType=0 controllerNumber=1 scan=21926	46.6822
39918:4	1	S.MP[+15.995]LP[+15.995]PHPGHP[+31.990]GYINF[+31.990]SYEVLTPLK.W		F[+32], P[+16]*2[+32]	700.851	4	2800.38	2800.37	0	6.8	17	NRagged	95.65	95.65	0	3.07	1032	>sp|P02817|AMELX_BOVIN Amelogenin, X isoform OS=Bos taurus OX=9913 GN=AMELX PE=1 SV=2	1	hf1_10472_ebo_22_1_261219.ScanId;v=1;d1=29086.29086.4	controllerType=0 controllerNumber=1 scan=29086	59.3975
28489:5	1	S.MP[+15.995]LP[+15.995]PHPGHPGY[+31.990]INF[+31.990]SYEVLTPLK.W		F[+32], P[+16]*2, Y[+32]	560.881	5	2800.37	2800.37	0	3.4	17	NRagged	102.94	102.94	0	2.22	1032	>sp|P02817|AMELX_BOVIN Amelogenin, X isoform OS=Bos taurus OX=9913 GN=AMELX PE=1 SV=2	1	hf1_10472_ebo_22_1_261219.ScanId;v=1;d1=21451.21451.2	controllerType=0 controllerNumber=1 scan=21451	45.8513
35865:4	1	S.MP[+15.995]LPPHPGHP[+31.990]GY[+15.995]INF[+31.990]SYEVLTPLK.W		F[+32], P[+16][+32], Y[+16]	700.848	4	2800.37	2800.37	0	1.9	17	NRagged	114.71	114.71	0	2.21	1032	>sp|P02817|AMELX_BOVIN Amelogenin, X isoform OS=Bos taurus OX=9913 GN=AMELX PE=1 SV=2	1	hf1_10472_ebo_22_1_261219.ScanId;v=1;d1=26416.26416.4	controllerType=0 controllerNumber=1 scan=26416	54.6335
35058:4	1	S.MPLPPHPGHPGY[+15.995]IN[+0.984]F[+31.990]SY[+31.990]EVLTPLK.W		F[+32], N[+1], Y[+16][+32]	697.1	4	2785.38	2785.35	0	9.2	17	NRagged	123.77	123.77	11.78	2.55	1032	>sp|P02817|AMELX_BOVIN Amelogenin, X isoform OS=Bos taurus OX=9913 GN=AMELX PE=1 SV=2	1	hf1_10472_ebo_22_1_261219.ScanId;v=1;d1=25880.25880.4	controllerType=0 controllerNumber=1 scan=25880	53.6775
46117:5	1	S.MP[+15.995]LP[+31.990]PHPGHPGY[+31.990]INF[+15.995]SYEVLTPLK.W		F[+16], P[+16][+32], Y[+32]	560.883	5	2800.39	2800.37	0	7.7	17	NRagged	127.98	127.98	0	2.8	1032	>sp|P02817|AMELX_BOVIN Amelogenin, X isoform OS=Bos taurus OX=9913 GN=AMELX PE=1 SV=2	1	hf1_10472_ebo_22_1_261219.ScanId;v=1;d1=34400.34400.5	controllerType=0 controllerNumber=1 scan=34400	73.6073
38416:4	1	S.MP[+15.995]LPPHPGHP[+31.990]GYINF[+31.990]SY[+15.995]EVLTPLK.W		F[+32], P[+16][+32], Y[+16]	700.85	4	2800.38	2800.37	0	4.4	17	NRagged	133.46	133.46	0	2.96	1032	>sp|P02817|AMELX_BOVIN Amelogenin, X isoform OS=Bos taurus OX=9913 GN=AMELX PE=1 SV=2	1	hf1_10472_ebo_22_1_261219.ScanId;v=1;d1=28096.28096.4	controllerType=0 controllerNumber=1 scan=28096	57.6303
44547:4	1	S.MP[+15.995]LP[+15.995]PHPGHP[+31.990]GYINF[+31.990]SYEVLTPLK.W		F[+32], P[+16]*2[+32]	700.847	4	2800.37	2800.37	0	0.2	17	NRagged	143.57	143.57	0	2.49	1032	>sp|P02817|AMELX_BOVIN Amelogenin, X isoform OS=Bos taurus OX=9913 GN=AMELX PE=1 SV=2	1	hf1_10472_ebo_22_1_261219.ScanId;v=1;d1=32366.32366.4	controllerType=0 controllerNumber=1 scan=32366	66.0092
00309:4	1	S.MP[+15.995]LPPHPGHPGY[+31.990]INF[+31.990]SY[+15.995]EVLTPLK.W		F[+32], P[+16], Y[+16][+32]	700.848	4	2800.37	2800.37	0	2.5	17	NRagged	148.61	148.61	0	2.95	1032	>sp|P02817|AMELX_BOVIN Amelogenin, X isoform OS=Bos taurus OX=9913 GN=AMELX PE=1 SV=2	1	hf1_10472_ebo_22_1_261219.ScanId;v=1;d1=720.720.4	controllerType=0 controllerNumber=1 scan=720	3.3814
44303:4	1	S.MP[+15.995]LP[+15.995]PHPGHP[+31.990]GYINF[+31.990]SYEVLTPLK.W		F[+32], P[+16]*2[+32]	700.849	4	2800.37	2800.37	0	3.1	17	NRagged	154.65	154.65	0	2.82	1032	>sp|P02817|AMELX_BOVIN Amelogenin, X isoform OS=Bos taurus OX=9913 GN=AMELX PE=1 SV=2	1	hf1_10472_ebo_22_1_261219.ScanId;v=1;d1=32134.32134.4	controllerType=0 controllerNumber=1 scan=32134	65.3281
39634:4	1	S.MP[+15.995]LPPHPGHP[+31.990]GY[+31.990]INFSY[+15.995]EVLTPLK.W		P[+16][+32], Y[+16][+32]	700.849	4	2800.37	2800.37	0	3.4	17	NRagged	156.55	156.55	0	2.82	1032	>sp|P02817|AMELX_BOVIN Amelogenin, X isoform OS=Bos taurus OX=9913 GN=AMELX PE=1 SV=2	1	hf1_10472_ebo_22_1_261219.ScanId;v=1;d1=28895.28895.4	controllerType=0 controllerNumber=1 scan=28895	59.0543
34422:4	1	S.MP[+15.995]LPPHPGHP[+15.995]GY[+31.990]INF[+31.990]SYEVLTPLK.W		F[+32], P[+16]*2, Y[+32]	700.847	4	2800.37	2800.37	0	0.8	17	NRagged	158.26	158.26	0	2.34	1032	>sp|P02817|AMELX_BOVIN Amelogenin, X isoform OS=Bos taurus OX=9913 GN=AMELX PE=1 SV=2	1	hf1_10472_ebo_22_1_261219.ScanId;v=1;d1=25445.25445.4	controllerType=0 controllerNumber=1 scan=25445	52.8975
31658:3	1	S.MP[+15.995]LPP[+31.990]H[+15.995]PGHPGYINFS[+79.966]YEVLTPLK.W		H[+16], P[+16][+32], S[+80]	950.125	3	2848.36	2848.34	0	7.1	17	NRagged	179.72	179.72	4	3.29	1032	>sp|P02817|AMELX_BOVIN Amelogenin, X isoform OS=Bos taurus OX=9913 GN=AMELX PE=1 SV=2	1	hf1_10472_ebo_22_1_261219.ScanId;v=1;d1=23615.23615.3	controllerType=0 controllerNumber=1 scan=23615	49.6476
37158:4	1	S.MP[+15.995]LPPHPGHP[+31.990]GYINF[+31.990]SY[+15.995]EVLTPLK.W		F[+32], P[+16][+32], Y[+16]	700.851	4	2800.38	2800.37	0	6.1	17	NRagged	181.74	181.74	0	3.99	1032	>sp|P02817|AMELX_BOVIN Amelogenin, X isoform OS=Bos taurus OX=9913 GN=AMELX PE=1 SV=2	1	hf1_10472_ebo_22_1_261219.ScanId;v=1;d1=27259.27259.4	controllerType=0 controllerNumber=1 scan=27259	56.1358
34771:4	1	S.MP[+15.995]LP[+31.990]PHPGHP[+15.995]GYINF[+31.990]SYEVLTPLK.W		F[+32], P[+16]*2[+32]	700.849	4	2800.37	2800.37	0	3.4	17	NRagged	184.42	184.42	0	3.33	1032	>sp|P02817|AMELX_BOVIN Amelogenin, X isoform OS=Bos taurus OX=9913 GN=AMELX PE=1 SV=2	1	hf1_10472_ebo_22_1_261219.ScanId;v=1;d1=25686.25686.4	controllerType=0 controllerNumber=1 scan=25686	53.3312
41001:4	1	S.MP[+15.995]LPPHPGHP[+31.990]GY[+31.990]INFSY[+15.995]EVLTPLK.W		P[+16][+32], Y[+16][+32]	700.849	4	2800.37	2800.37	0	3.3	17	NRagged	214.97	214.97	0	4.02	1032	>sp|P02817|AMELX_BOVIN Amelogenin, X isoform OS=Bos taurus OX=9913 GN=AMELX PE=1 SV=2	1	hf1_10472_ebo_22_1_261219.ScanId;v=1;d1=29801.29801.4	controllerType=0 controllerNumber=1 scan=29801	60.676
35025:4	1	S.MPLPPHPGHPGYINFS[+79.966]YEVLTPLKW.Y		S[+80]	743.37	4	2970.46	2970.44	0	5.6	17	Non	209.28	209.28	26.42	3.81	1032	>sp|P02817|AMELX_BOVIN Amelogenin, X isoform OS=Bos taurus OX=9913 GN=AMELX PE=1 SV=2	1	hf1_10472_ebo_22_1_261219.ScanId;v=1;d1=25861.25861.4	controllerType=0 controllerNumber=1 scan=25861	53.6459
32241:4	1	S.MP[+15.995]LPPHPGHPGYINFSYEVLTPLKW.Y		P[+16]	727.376	4	2906.48	2906.47	0	4.5	17	Non	288.85	288.85	5.8	5.2	1032	>sp|P02817|AMELX_BOVIN Amelogenin, X isoform OS=Bos taurus OX=9913 GN=AMELX PE=1 SV=2	1	hf1_10472_ebo_22_1_261219.ScanId;v=1;d1=23999.23999.4	controllerType=0 controllerNumber=1 scan=23999	50.3253
35606:4	1	S.MPLPPHPGHPGYINFS[+79.966]YEVLTPLKW.Y		S[+80]	743.371	4	2970.46	2970.44	0	7	17	Non	348.94	348.94	92.96	5.79	1032	>sp|P02817|AMELX_BOVIN Amelogenin, X isoform OS=Bos taurus OX=9913 GN=AMELX PE=1 SV=2	1	hf1_10472_ebo_22_1_261219.ScanId;v=1;d1=26251.26251.4	controllerType=0 controllerNumber=1 scan=26251	54.3397
35315:4	1	S.MPLPPHPGHPGYINFS[+79.966]YEVLTPLKW.Y		S[+80]	743.37	4	2970.46	2970.44	0	5.6	17	Non	489.71	489.71	192.79	6.58	1032	>sp|P02817|AMELX_BOVIN Amelogenin, X isoform OS=Bos taurus OX=9913 GN=AMELX PE=1 SV=2	1	hf1_10472_ebo_22_1_261219.ScanId;v=1;d1=26059.26059.4	controllerType=0 controllerNumber=1 scan=26059	53.9981
35034:3	1	S.MPLPPHPGHPGYINFS[+79.966]YEVLTPLKW.Y		S[+80]	990.824	3	2970.46	2970.44	0	5.5	17	Non	631.96	631.96	282.44	9.32	1032	>sp|P02817|AMELX_BOVIN Amelogenin, X isoform OS=Bos taurus OX=9913 GN=AMELX PE=1 SV=2	1	hf1_10472_ebo_22_1_261219.ScanId;v=1;d1=25866.25866.3	controllerType=0 controllerNumber=1 scan=25866	53.6535
35605:3	1	S.MPLPPHPGHPGYINFS[+79.966]YEVLTPLKW.Y		S[+80]	990.826	3	2970.46	2970.44	0	7.2	17	Non	883.98	883.98	418.85	14.59	1032	>sp|P02817|AMELX_BOVIN Amelogenin, X isoform OS=Bos taurus OX=9913 GN=AMELX PE=1 SV=2	1	hf1_10472_ebo_22_1_261219.ScanId;v=1;d1=26250.26250.3	controllerType=0 controllerNumber=1 scan=26250	54.3383
35314:3	1	S.MPLPPHPGHPGYINFS[+79.966]YEVLTPLKW.Y		S[+80]	990.825	3	2970.46	2970.44	0	6.4	17	Non	1019.01	1019.01	483.74	17.59	1032	>sp|P02817|AMELX_BOVIN Amelogenin, X isoform OS=Bos taurus OX=9913 GN=AMELX PE=1 SV=2	1	hf1_10472_ebo_22_1_261219.ScanId;v=1;d1=26058.26058.3	controllerType=0 controllerNumber=1 scan=26058	53.9966
33408:4	1	S.MPLPPHPGHPGYINFS[+79.966]YEVLTPLKW[+31.990].Y		S[+80], W[+32]	751.368	4	3002.45	3002.43	0	6.3	17	Non	54.49	54.49	8.19	2.13	1032	>sp|P02817|AMELX_BOVIN Amelogenin, X isoform OS=Bos taurus OX=9913 GN=AMELX PE=1 SV=2	1	hf1_10472_ebo_22_1_261219.ScanId;v=1;d1=24769.24769.4	controllerType=0 controllerNumber=1 scan=24769	51.6906
34932:4	1	S.MP[+15.995]LPPHPGHPGYINFS[+79.966]YEVLTPLKW.Y		P[+16], S[+80]	747.367	4	2986.45	2986.44	0	3.3	17	Non	149.67	149.67	1.01	2.19	1032	>sp|P02817|AMELX_BOVIN Amelogenin, X isoform OS=Bos taurus OX=9913 GN=AMELX PE=1 SV=2	1	hf1_10472_ebo_22_1_261219.ScanId;v=1;d1=25797.25797.4	controllerType=0 controllerNumber=1 scan=25797	53.5293
34357:4	1	S.MP[+15.995]LPPHPGHPGYINFS[+79.966]YEVLTPLKW.Y		P[+16], S[+80]	747.37	4	2986.46	2986.44	0	6.7	17	Non	208.4	208.4	6.84	4.07	1032	>sp|P02817|AMELX_BOVIN Amelogenin, X isoform OS=Bos taurus OX=9913 GN=AMELX PE=1 SV=2	1	hf1_10472_ebo_22_1_261219.ScanId;v=1;d1=25404.25404.4	controllerType=0 controllerNumber=1 scan=25404	52.827
33377:3	1	S.MPLPPHPGHPGYINFS[+79.966]YEVLTPLKW[+31.990].Y		S[+80], W[+32]	1001.49	3	3002.44	3002.43	0	4.5	17	Non	242.37	242.37	29.68	4.86	1032	>sp|P02817|AMELX_BOVIN Amelogenin, X isoform OS=Bos taurus OX=9913 GN=AMELX PE=1 SV=2	1	hf1_10472_ebo_22_1_261219.ScanId;v=1;d1=24751.24751.3	controllerType=0 controllerNumber=1 scan=24751	51.6577
33785:4	1	S.MP[+15.995]LPPHPGHPGYINFS[+79.966]YEVLTPLKW.Y		P[+16], S[+80]	747.368	4	2986.45	2986.44	0	5.3	17	Non	261.88	261.88	10.58	4.87	1032	>sp|P02817|AMELX_BOVIN Amelogenin, X isoform OS=Bos taurus OX=9913 GN=AMELX PE=1 SV=2	1	hf1_10472_ebo_22_1_261219.ScanId;v=1;d1=25019.25019.4	controllerType=0 controllerNumber=1 scan=25019	52.1329
34378:3	1	S.M[+15.995]PLPPHPGHPGYINFS[+79.966]YEVLTPLKW.Y		M[+16], S[+80]	996.158	3	2986.46	2986.44	0	7.4	17	Non	392.56	392.56	9.3	6.77	1032	>sp|P02817|AMELX_BOVIN Amelogenin, X isoform OS=Bos taurus OX=9913 GN=AMELX PE=1 SV=2	1	hf1_10472_ebo_22_1_261219.ScanId;v=1;d1=25418.25418.3	controllerType=0 controllerNumber=1 scan=25418	52.851
34061:4	1	S.MP[+15.995]LPPHPGHPGYINFS[+79.966]YEVLTPLKW.Y		P[+16], S[+80]	747.369	4	2986.45	2986.44	0	6.1	17	Non	424.61	424.61	13.47	6.71	1032	>sp|P02817|AMELX_BOVIN Amelogenin, X isoform OS=Bos taurus OX=9913 GN=AMELX PE=1 SV=2	1	hf1_10472_ebo_22_1_261219.ScanId;v=1;d1=25209.25209.4	controllerType=0 controllerNumber=1 scan=25209	52.4803
35905:3	1	S.MPLPPHPGHPGYIN[+0.984]FS[+79.966]YEVLTPLKW.Y		N[+1], S[+80]	991.155	3	2971.45	2971.43	0	8.2	17	Non	621.79	621.79	237.08	8.79	1032	>sp|P02817|AMELX_BOVIN Amelogenin, X isoform OS=Bos taurus OX=9913 GN=AMELX PE=1 SV=2	1	hf1_10472_ebo_22_1_261219.ScanId;v=1;d1=26443.26443.3	controllerType=0 controllerNumber=1 scan=26443	54.6831
36212:3	1	S.MPLPPHPGHPGYIN[+0.984]FS[+79.966]YEVLTPLKW.Y		N[+1], S[+80]	991.153	3	2971.44	2971.43	0	6.3	17	Non	664.05	664.05	293.93	10.59	1032	>sp|P02817|AMELX_BOVIN Amelogenin, X isoform OS=Bos taurus OX=9913 GN=AMELX PE=1 SV=2	1	hf1_10472_ebo_22_1_261219.ScanId;v=1;d1=26642.26642.3	controllerType=0 controllerNumber=1 scan=26642	55.0363
34398:3	1	S.M[+15.995]PLPPHPGHPGYINFS[+79.966]YEVLTPLKW.Y		M[+16], S[+80]	996.157	3	2986.46	2986.44	0	7	17	Non	748.03	748.03	23.63	11.59	1032	>sp|P02817|AMELX_BOVIN Amelogenin, X isoform OS=Bos taurus OX=9913 GN=AMELX PE=1 SV=2	1	hf1_10472_ebo_22_1_261219.ScanId;v=1;d1=25429.25429.3	controllerType=0 controllerNumber=1 scan=25429	52.8704
34095:3	1	S.M[+15.995]PLPPHPGHPGYINFS[+79.966]YEVLTPLKW.Y		M[+16], S[+80]	996.157	3	2986.46	2986.44	0	6.4	17	Non	896.47	896.47	38.37	14.59	1032	>sp|P02817|AMELX_BOVIN Amelogenin, X isoform OS=Bos taurus OX=9913 GN=AMELX PE=1 SV=2	1	hf1_10472_ebo_22_1_261219.ScanId;v=1;d1=25230.25230.3	controllerType=0 controllerNumber=1 scan=25230	52.5176
33808:3	1	S.M[+15.995]PLPPHPGHPGYINFS[+79.966]YEVLTPLKW.Y		M[+16], S[+80]	996.157	3	2986.45	2986.44	0	6.3	17	Non	904.57	904.57	28.68	15.59	1032	>sp|P02817|AMELX_BOVIN Amelogenin, X isoform OS=Bos taurus OX=9913 GN=AMELX PE=1 SV=2	1	hf1_10472_ebo_22_1_261219.ScanId;v=1;d1=25037.25037.3	controllerType=0 controllerNumber=1 scan=25037	52.1651
32145:4	1	S.MP[+15.995]LPPHPGHPGYINFS[+79.966]YEVLTPLKW[+15.995].Y		P[+16], S[+80], W[+16]	751.367	4	3002.45	3002.43	0	5	17	Non	60.23	60.23	4	2.2	1032	>sp|P02817|AMELX_BOVIN Amelogenin, X isoform OS=Bos taurus OX=9913 GN=AMELX PE=1 SV=2	1	hf1_10472_ebo_22_1_261219.ScanId;v=1;d1=23933.23933.4	controllerType=0 controllerNumber=1 scan=23933	50.2096
36210:4	1	S.MPLPPHPGHP[+15.995]GY[+31.990]INF[+31.990]SYEVLTPLKW.Y		F[+32], P[+16], Y[+32]	743.366	4	2970.44	2970.45	0	-2.5	17	Non	112.25	112.25	0	1.56	1032	>sp|P02817|AMELX_BOVIN Amelogenin, X isoform OS=Bos taurus OX=9913 GN=AMELX PE=1 SV=2	1	hf1_10472_ebo_22_1_261219.ScanId;v=1;d1=26641.26641.4	controllerType=0 controllerNumber=1 scan=26641	55.0348
34933:4	1	S.MP[+15.995]LPPHPGHPGYIN[+0.984]FS[+79.966]YEVLTPLKW.Y		N[+1], P[+16], S[+80]	747.618	4	2987.45	2987.42	0	9.5	17	Non	117.22	117.22	5.8	2.13	1032	>sp|P02817|AMELX_BOVIN Amelogenin, X isoform OS=Bos taurus OX=9913 GN=AMELX PE=1 SV=2	1	hf1_10472_ebo_22_1_261219.ScanId;v=1;d1=25797.25797.4	controllerType=0 controllerNumber=1 scan=25797	53.5293
35051:3	1	S.MP[+15.995]LPPHPGHPGYIN[+0.984]FS[+79.966]YEVLTPLKW.Y		N[+1], P[+16], S[+80]	996.485	3	2987.44	2987.42	0	6.3	17	Non	144	144	5.8	3	1032	>sp|P02817|AMELX_BOVIN Amelogenin, X isoform OS=Bos taurus OX=9913 GN=AMELX PE=1 SV=2	1	hf1_10472_ebo_22_1_261219.ScanId;v=1;d1=25876.25876.3	controllerType=0 controllerNumber=1 scan=25876	53.6714
35907:4	1	S.MPLPPHPGHP[+15.995]GY[+31.990]INF[+31.990]SYEVLTPLKW.Y		F[+32], P[+16], Y[+32]	743.364	4	2970.43	2970.45	0	-4.9	17	Non	155.66	155.66	0	2.14	1032	>sp|P02817|AMELX_BOVIN Amelogenin, X isoform OS=Bos taurus OX=9913 GN=AMELX PE=1 SV=2	1	hf1_10472_ebo_22_1_261219.ScanId;v=1;d1=26444.26444.4	controllerType=0 controllerNumber=1 scan=26444	54.6846
32341:3	1	S.MP[+15.995]LPPHPGHPGYINFS[+79.966]YEVLTPLKW[+15.995].Y		P[+16], S[+80], W[+16]	1001.49	3	3002.45	3002.43	0	5.8	17	Non	174.35	154.33	2	2.77	1032	>sp|P02817|AMELX_BOVIN Amelogenin, X isoform OS=Bos taurus OX=9913 GN=AMELX PE=1 SV=2	1	hf1_10472_ebo_22_1_261219.ScanId;v=1;d1=24068.24068.3	controllerType=0 controllerNumber=1 scan=24068	50.4459
34653:4	1	S.MP[+15.995]LPPHPGHPGYIN[+0.984]FS[+79.966]YEVLTPLKW.Y		N[+1], P[+16], S[+80]	747.615	4	2987.44	2987.42	0	6.5	17	Non	215.36	215.36	12.52	4.07	1032	>sp|P02817|AMELX_BOVIN Amelogenin, X isoform OS=Bos taurus OX=9913 GN=AMELX PE=1 SV=2	1	hf1_10472_ebo_22_1_261219.ScanId;v=1;d1=25601.25601.4	controllerType=0 controllerNumber=1 scan=25601	53.1782
33679:3	1	S.MP[+15.995]LPPHPGHPGYINFS[+79.966]Y[+15.995]EVLTPLKW.Y		P[+16], S[+80], Y[+16]	1001.49	3	3002.44	3002.43	0	4.4	17	Non	246.26	246.26	2.48	4.61	1032	>sp|P02817|AMELX_BOVIN Amelogenin, X isoform OS=Bos taurus OX=9913 GN=AMELX PE=1 SV=2	1	hf1_10472_ebo_22_1_261219.ScanId;v=1;d1=24950.24950.3	controllerType=0 controllerNumber=1 scan=24950	52.0125
32326:4	1	S.MP[+15.995]LPPHPGHPGYINFS[+79.966]YEVLTPLKW[+31.990].Y		P[+16], S[+80], W[+32]	755.366	4	3018.44	3018.43	0	5.2	17	Non	248.68	248.68	4	4.6	1032	>sp|P02817|AMELX_BOVIN Amelogenin, X isoform OS=Bos taurus OX=9913 GN=AMELX PE=1 SV=2	1	hf1_10472_ebo_22_1_261219.ScanId;v=1;d1=24059.24059.4	controllerType=0 controllerNumber=1 scan=24059	50.4322
32036:4	1	S.MP[+15.995]LPPHPGHPGYINFS[+79.966]YEVLTPLKW[+31.990].Y		P[+16], S[+80], W[+32]	755.367	4	3018.44	3018.43	0	6.2	17	Non	270.43	247.02	4	4.87	1032	>sp|P02817|AMELX_BOVIN Amelogenin, X isoform OS=Bos taurus OX=9913 GN=AMELX PE=1 SV=2	1	hf1_10472_ebo_22_1_261219.ScanId;v=1;d1=23865.23865.4	controllerType=0 controllerNumber=1 scan=23865	50.09
34957:3	1	S.M[+15.995]PLPPHPGHPGYIN[+0.984]FS[+79.966]YEVLTPLKW.Y		M[+16], N[+1], S[+80]	996.485	3	2987.44	2987.42	0	7.2	17	Non	476.66	440.35	20.97	7.08	1032	>sp|P02817|AMELX_BOVIN Amelogenin, X isoform OS=Bos taurus OX=9913 GN=AMELX PE=1 SV=2	1	hf1_10472_ebo_22_1_261219.ScanId;v=1;d1=25814.25814.3	controllerType=0 controllerNumber=1 scan=25814	53.5607
32294:3	1	S.M[+15.995]PLPPHPGHPGYINFS[+79.966]YEVLTPLKW[+31.990].Y		M[+16], S[+80], W[+32]	1006.82	3	3018.44	3018.43	0	5.5	17	Non	776.5	776.5	8.19	12.32	1032	>sp|P02817|AMELX_BOVIN Amelogenin, X isoform OS=Bos taurus OX=9913 GN=AMELX PE=1 SV=2	1	hf1_10472_ebo_22_1_261219.ScanId;v=1;d1=24037.24037.3	controllerType=0 controllerNumber=1 scan=24037	50.394
34674:3	1	S.M[+15.995]PLPPHPGHPGYIN[+0.984]FS[+79.966]YEVLTPLKW.Y		M[+16], N[+1], S[+80]	996.485	3	2987.44	2987.42	0	6.9	17	Non	857.68	645.48	22.69	14.59	1032	>sp|P02817|AMELX_BOVIN Amelogenin, X isoform OS=Bos taurus OX=9913 GN=AMELX PE=1 SV=2	1	hf1_10472_ebo_22_1_261219.ScanId;v=1;d1=25618.25618.3	controllerType=0 controllerNumber=1 scan=25618	53.2124
36211:4	1	S.MPLPPHPGHP[+31.990]GY[+31.990]IN[+0.984]F[+15.995]SYEVLTPLKW.Y		F[+16], N[+1], P[+32], Y[+32]	743.617	4	2971.45	2971.43	0	4.3	17	Non	86.28	86.28	0	2.2	1032	>sp|P02817|AMELX_BOVIN Amelogenin, X isoform OS=Bos taurus OX=9913 GN=AMELX PE=1 SV=2	1	hf1_10472_ebo_22_1_261219.ScanId;v=1;d1=26641.26641.4	controllerType=0 controllerNumber=1 scan=26641	55.0348
32896:4	1	S.MP[+15.995]LPPHPGHPGYIN[+0.984]FS[+79.966]YEVLTPLKW[+31.990].Y		N[+1], P[+16], S[+80], W[+32]	755.613	4	3019.43	3019.41	0	6.2	17	Non	117.56	117.56	5.8	2.27	1032	>sp|P02817|AMELX_BOVIN Amelogenin, X isoform OS=Bos taurus OX=9913 GN=AMELX PE=1 SV=2	1	hf1_10472_ebo_22_1_261219.ScanId;v=1;d1=24430.24430.4	controllerType=0 controllerNumber=1 scan=24430	51.087
34015:4	1	S.MP[+15.995]LPPHPGHPGYINFSYEVLTPLKWY.Q		P[+16]	768.141	4	3069.54	3069.53	0	3.2	17	Non	102.78	102.78	4	2.16	1032	>sp|P02817|AMELX_BOVIN Amelogenin, X isoform OS=Bos taurus OX=9913 GN=AMELX PE=1 SV=2	1	hf1_10472_ebo_22_1_261219.ScanId;v=1;d1=25176.25176.4	controllerType=0 controllerNumber=1 scan=25176	52.4172
46078:4	1	S.MPLPPHPGHPGYINFS[+79.966]YEVLTPLKWY.Q		S[+80]	784.137	4	3133.53	3133.5	0	6.9	17	Non	233.78	233.78	17.41	4.52	1032	>sp|P02817|AMELX_BOVIN Amelogenin, X isoform OS=Bos taurus OX=9913 GN=AMELX PE=1 SV=2	1	hf1_10472_ebo_22_1_261219.ScanId;v=1;d1=34367.34367.4	controllerType=0 controllerNumber=1 scan=34367	73.549
32387:4	1	S.MP[+15.995]LPPHPGHPGYINFSYEVLTPLKWY.Q		P[+16]	768.143	4	3069.55	3069.53	0	5.5	17	Non	253.05	253.05	4	5.07	1032	>sp|P02817|AMELX_BOVIN Amelogenin, X isoform OS=Bos taurus OX=9913 GN=AMELX PE=1 SV=2	1	hf1_10472_ebo_22_1_261219.ScanId;v=1;d1=24096.24096.4	controllerType=0 controllerNumber=1 scan=24096	50.4963
36150:4	1	S.MPLPPHPGHPGYINFS[+79.966]YEVLTPLKWY.Q		S[+80]	784.137	4	3133.53	3133.5	0	7.3	17	Non	279.43	279.43	44.08	5.32	1032	>sp|P02817|AMELX_BOVIN Amelogenin, X isoform OS=Bos taurus OX=9913 GN=AMELX PE=1 SV=2	1	hf1_10472_ebo_22_1_261219.ScanId;v=1;d1=26600.26600.4	controllerType=0 controllerNumber=1 scan=26600	54.9614
37037:4	1	S.MPLPPHPGHPGYINFS[+79.966]YEVLTPLKWY.Q		S[+80]	784.132	4	3133.5	3133.5	0	0.1	17	Non	292.61	292.61	10.93	4.34	1032	>sp|P02817|AMELX_BOVIN Amelogenin, X isoform OS=Bos taurus OX=9913 GN=AMELX PE=1 SV=2	1	hf1_10472_ebo_22_1_261219.ScanId;v=1;d1=27182.27182.4	controllerType=0 controllerNumber=1 scan=27182	55.9986
36728:4	1	S.MPLPPHPGHPGYINFS[+79.966]YEVLTPLKWY.Q		S[+80]	784.137	4	3133.52	3133.5	0	6.4	17	Non	339.96	339.96	13.62	5.85	1032	>sp|P02817|AMELX_BOVIN Amelogenin, X isoform OS=Bos taurus OX=9913 GN=AMELX PE=1 SV=2	1	hf1_10472_ebo_22_1_261219.ScanId;v=1;d1=26983.26983.4	controllerType=0 controllerNumber=1 scan=26983	55.6437
36446:4	1	S.MPLPPHPGHPGYINFS[+79.966]YEVLTPLKWY.Q		S[+80]	784.137	4	3133.52	3133.5	0	6.5	17	Non	356.83	356.83	33.87	5.85	1032	>sp|P02817|AMELX_BOVIN Amelogenin, X isoform OS=Bos taurus OX=9913 GN=AMELX PE=1 SV=2	1	hf1_10472_ebo_22_1_261219.ScanId;v=1;d1=26793.26793.4	controllerType=0 controllerNumber=1 scan=26793	55.3046
33477:4	1	S.MP[+15.995]LPPHPGHPGYINFSYEVLTPLKWY.Q		P[+16]	768.144	4	3069.55	3069.53	0	6.5	17	Non	398.99	398.99	5.8	7.19	1032	>sp|P02817|AMELX_BOVIN Amelogenin, X isoform OS=Bos taurus OX=9913 GN=AMELX PE=1 SV=2	1	hf1_10472_ebo_22_1_261219.ScanId;v=1;d1=24812.24812.4	controllerType=0 controllerNumber=1 scan=24812	51.7662
37075:3	1	S.MPLPPHPGHPGYINFS[+79.966]YEVLTPLKWY.Q		S[+80]	1045.17	3	3133.51	3133.5	0	0.2	17	Non	638.64	638.64	213.66	8.48	1032	>sp|P02817|AMELX_BOVIN Amelogenin, X isoform OS=Bos taurus OX=9913 GN=AMELX PE=1 SV=2	1	hf1_10472_ebo_22_1_261219.ScanId;v=1;d1=27205.27205.3	controllerType=0 controllerNumber=1 scan=27205	56.0394
36173:3	1	S.MPLPPHPGHPGYINFS[+79.966]YEVLTPLKWY.Q		S[+80]	1045.18	3	3133.53	3133.5	0	7.1	17	Non	830.72	830.72	373.91	13.79	1032	>sp|P02817|AMELX_BOVIN Amelogenin, X isoform OS=Bos taurus OX=9913 GN=AMELX PE=1 SV=2	1	hf1_10472_ebo_22_1_261219.ScanId;v=1;d1=26615.26615.3	controllerType=0 controllerNumber=1 scan=26615	54.987
36765:3	1	S.MPLPPHPGHPGYINFS[+79.966]YEVLTPLKWY.Q		S[+80]	1045.18	3	3133.53	3133.5	0	6.9	17	Non	875.6	875.6	306.96	14.79	1032	>sp|P02817|AMELX_BOVIN Amelogenin, X isoform OS=Bos taurus OX=9913 GN=AMELX PE=1 SV=2	1	hf1_10472_ebo_22_1_261219.ScanId;v=1;d1=27007.27007.3	controllerType=0 controllerNumber=1 scan=27007	55.686
36477:3	1	S.MPLPPHPGHPGYINFS[+79.966]YEVLTPLKWY.Q		S[+80]	1045.18	3	3133.53	3133.5	0	6.6	17	Non	1012.6	1012.6	436.66	17.79	1032	>sp|P02817|AMELX_BOVIN Amelogenin, X isoform OS=Bos taurus OX=9913 GN=AMELX PE=1 SV=2	1	hf1_10472_ebo_22_1_261219.ScanId;v=1;d1=26815.26815.3	controllerType=0 controllerNumber=1 scan=26815	55.3435
43362:3	1	S.MP[+15.995]LPPHPGHPGYINFS[+79.966]YEVLTPLKWY.Q		P[+16], S[+80]	1050.51	3	3149.51	3149.5	0	4.5	17	Non	8.73	8.73	4	2.15	1032	>sp|P02817|AMELX_BOVIN Amelogenin, X isoform OS=Bos taurus OX=9913 GN=AMELX PE=1 SV=2	1	hf1_10472_ebo_22_1_261219.ScanId;v=1;d1=31431.31431.3	controllerType=0 controllerNumber=1 scan=31431	63.8016
37295:3	1	S.MP[+15.995]LPPHPGHPGYINFS[+79.966]YEVLTPLKWY.Q		P[+16], S[+80]	1050.51	3	3149.52	3149.5	0	6.2	17	Non	11.91	11.91	4	2.15	1032	>sp|P02817|AMELX_BOVIN Amelogenin, X isoform OS=Bos taurus OX=9913 GN=AMELX PE=1 SV=2	1	hf1_10472_ebo_22_1_261219.ScanId;v=1;d1=27349.27349.3	controllerType=0 controllerNumber=1 scan=27349	56.2956
38290:3	1	S.MP[+15.995]LPPHPGHPGYINFS[+79.966]YEVLTPLKWY.Q		P[+16], S[+80]	1050.51	3	3149.53	3149.5	0	9.2	17	Non	28.09	28.09	4	2.11	1032	>sp|P02817|AMELX_BOVIN Amelogenin, X isoform OS=Bos taurus OX=9913 GN=AMELX PE=1 SV=2	1	hf1_10472_ebo_22_1_261219.ScanId;v=1;d1=28014.28014.3	controllerType=0 controllerNumber=1 scan=28014	57.4804
38284:4	1	S.MP[+15.995]LPPHPGHPGYINFS[+79.966]YEVLTPLKWY.Q		P[+16], S[+80]	788.137	4	3149.52	3149.5	0	8	17	Non	89.88	89.88	4	2.35	1032	>sp|P02817|AMELX_BOVIN Amelogenin, X isoform OS=Bos taurus OX=9913 GN=AMELX PE=1 SV=2	1	hf1_10472_ebo_22_1_261219.ScanId;v=1;d1=28009.28009.4	controllerType=0 controllerNumber=1 scan=28009	57.4699
37638:4	1	S.MP[+15.995]LPPHPGHPGYINFS[+79.966]YEVLTPLKWY.Q		P[+16], S[+80]	788.137	4	3149.53	3149.5	0	8.1	17	Non	127.43	127.43	5.8	2.21	1032	>sp|P02817|AMELX_BOVIN Amelogenin, X isoform OS=Bos taurus OX=9913 GN=AMELX PE=1 SV=2	1	hf1_10472_ebo_22_1_261219.ScanId;v=1;d1=27580.27580.4	controllerType=0 controllerNumber=1 scan=27580	56.7058
35637:4	1	S.MPLPPHPGHPGYINFS[+79.966]YEVLTPLKW[+31.990]Y.Q		S[+80], W[+32]	792.135	4	3165.52	3165.49	0	7.2	17	Non	146.63	146.63	17.09	2.57	1032	>sp|P02817|AMELX_BOVIN Amelogenin, X isoform OS=Bos taurus OX=9913 GN=AMELX PE=1 SV=2	1	hf1_10472_ebo_22_1_261219.ScanId;v=1;d1=26272.26272.4	controllerType=0 controllerNumber=1 scan=26272	54.3776
34876:4	1	S.M[+15.995]PLPPHPGHPGYINFS[+79.966]YEVLTPLKWY.Q		M[+16], S[+80]	788.135	4	3149.52	3149.5	0	6.1	17	Non	158.6	158.6	1.41	2.41	1032	>sp|P02817|AMELX_BOVIN Amelogenin, X isoform OS=Bos taurus OX=9913 GN=AMELX PE=1 SV=2	1	hf1_10472_ebo_22_1_261219.ScanId;v=1;d1=25758.25758.4	controllerType=0 controllerNumber=1 scan=25758	53.4623
35348:4	1	S.MPLPPHPGHPGYINFS[+79.966]YEVLTPLKW[+31.990]Y.Q		S[+80], W[+32]	792.134	4	3165.52	3165.49	0	6.6	17	Non	212.25	212.25	6.68	4.27	1032	>sp|P02817|AMELX_BOVIN Amelogenin, X isoform OS=Bos taurus OX=9913 GN=AMELX PE=1 SV=2	1	hf1_10472_ebo_22_1_261219.ScanId;v=1;d1=26081.26081.4	controllerType=0 controllerNumber=1 scan=26081	54.0369
46111:4	1	S.MP[+15.995]LPPHPGHPGYINFS[+79.966]YEVLTPLKWY.Q		P[+16], S[+80]	788.137	4	3149.53	3149.5	0	9	17	Non	222.46	222.46	4	3.73	1032	>sp|P02817|AMELX_BOVIN Amelogenin, X isoform OS=Bos taurus OX=9913 GN=AMELX PE=1 SV=2	1	hf1_10472_ebo_22_1_261219.ScanId;v=1;d1=34396.34396.4	controllerType=0 controllerNumber=1 scan=34396	73.6013
37333:4	1	S.MPLPPHPGHPGYIN[+0.984]FS[+79.966]YEVLTPLKWY.Q		N[+1], S[+80]	784.383	4	3134.51	3134.49	0	7	17	Non	252.36	252.36	24.38	5.32	1032	>sp|P02817|AMELX_BOVIN Amelogenin, X isoform OS=Bos taurus OX=9913 GN=AMELX PE=1 SV=2	1	hf1_10472_ebo_22_1_261219.ScanId;v=1;d1=27373.27373.4	controllerType=0 controllerNumber=1 scan=27373	56.3405
36410:4	1	S.MP[+15.995]LPPHPGHPGYINFS[+79.966]YEVLTPLKWY.Q		P[+16], S[+80]	788.135	4	3149.52	3149.5	0	5.3	17	Non	277.09	277.09	5.8	5.06	1032	>sp|P02817|AMELX_BOVIN Amelogenin, X isoform OS=Bos taurus OX=9913 GN=AMELX PE=1 SV=2	1	hf1_10472_ebo_22_1_261219.ScanId;v=1;d1=26771.26771.4	controllerType=0 controllerNumber=1 scan=26771	55.2657
35503:4	1	S.MP[+15.995]LPPHPGHPGYINFS[+79.966]YEVLTPLKWY.Q		P[+16], S[+80]	788.136	4	3149.52	3149.5	0	6.7	17	Non	297.45	297.45	4	5.65	1032	>sp|P02817|AMELX_BOVIN Amelogenin, X isoform OS=Bos taurus OX=9913 GN=AMELX PE=1 SV=2	1	hf1_10472_ebo_22_1_261219.ScanId;v=1;d1=26184.26184.4	controllerType=0 controllerNumber=1 scan=26184	54.2213
36107:4	1	S.MP[+15.995]LPPHPGHPGYINFS[+79.966]YEVLTPLKWY.Q		P[+16], S[+80]	788.133	4	3149.51	3149.5	0	3.6	17	Non	331.98	331.98	5.8	5.13	1032	>sp|P02817|AMELX_BOVIN Amelogenin, X isoform OS=Bos taurus OX=9913 GN=AMELX PE=1 SV=2	1	hf1_10472_ebo_22_1_261219.ScanId;v=1;d1=26573.26573.4	controllerType=0 controllerNumber=1 scan=26573	54.9146
34928:4	1	S.MP[+15.995]LPPHPGHPGYINFS[+79.966]YEVLTPLKWY.Q		P[+16], S[+80]	788.135	4	3149.52	3149.5	0	5.9	17	Non	335.18	335.18	4	5.58	1032	>sp|P02817|AMELX_BOVIN Amelogenin, X isoform OS=Bos taurus OX=9913 GN=AMELX PE=1 SV=2	1	hf1_10472_ebo_22_1_261219.ScanId;v=1;d1=25795.25795.4	controllerType=0 controllerNumber=1 scan=25795	53.5263
35207:4	1	S.MP[+15.995]LPPHPGHPGYINFS[+79.966]YEVLTPLKWY.Q		P[+16], S[+80]	788.136	4	3149.52	3149.5	0	7	17	Non	338.32	338.32	4	5.85	1032	>sp|P02817|AMELX_BOVIN Amelogenin, X isoform OS=Bos taurus OX=9913 GN=AMELX PE=1 SV=2	1	hf1_10472_ebo_22_1_261219.ScanId;v=1;d1=25987.25987.4	controllerType=0 controllerNumber=1 scan=25987	53.8695
35692:3	1	S.MPLPPHPGHPGYINFS[+79.966]YEVLTPLKWY[+31.990].Q		S[+80], Y[+32]	1055.84	3	3165.52	3165.49	0	7.5	17	Non	355.99	355.99	0	6	1032	>sp|P02817|AMELX_BOVIN Amelogenin, X isoform OS=Bos taurus OX=9913 GN=AMELX PE=1 SV=2	1	hf1_10472_ebo_22_1_261219.ScanId;v=1;d1=26305.26305.3	controllerType=0 controllerNumber=1 scan=26305	54.4365
35392:3	1	S.MPLPPHPGHPGYINFS[+79.966]YEVLTPLKWY[+31.990].Q		S[+80], Y[+32]	1055.84	3	3165.52	3165.49	0	7.3	17	Non	582.44	582.44	0	8.79	1032	>sp|P02817|AMELX_BOVIN Amelogenin, X isoform OS=Bos taurus OX=9913 GN=AMELX PE=1 SV=2	1	hf1_10472_ebo_22_1_261219.ScanId;v=1;d1=26111.26111.3	controllerType=0 controllerNumber=1 scan=26111	54.0908
37369:3	1	S.MPLPPHPGHPGYIN[+0.984]FS[+79.966]YEVLTPLKWY.Q		N[+1], S[+80]	1045.51	3	3134.51	3134.49	0	6.9	17	Non	643.42	643.42	280.26	9.79	1032	>sp|P02817|AMELX_BOVIN Amelogenin, X isoform OS=Bos taurus OX=9913 GN=AMELX PE=1 SV=2	1	hf1_10472_ebo_22_1_261219.ScanId;v=1;d1=27395.27395.3	controllerType=0 controllerNumber=1 scan=27395	56.3796
34900:3	1	S.M[+15.995]PLPPHPGHPGYINFS[+79.966]YEVLTPLKWY.Q		M[+16], S[+80]	1050.51	3	3149.52	3149.5	0	7.5	17	Non	724.36	724.36	31.71	11.79	1032	>sp|P02817|AMELX_BOVIN Amelogenin, X isoform OS=Bos taurus OX=9913 GN=AMELX PE=1 SV=2	1	hf1_10472_ebo_22_1_261219.ScanId;v=1;d1=25774.25774.3	controllerType=0 controllerNumber=1 scan=25774	53.4893
35187:3	1	S.M[+15.995]PLPPHPGHPGYINFS[+79.966]YEVLTPLKWY.Q		M[+16], S[+80]	1050.51	3	3149.52	3149.5	0	6.3	17	Non	911.22	911.22	15.41	15.79	1032	>sp|P02817|AMELX_BOVIN Amelogenin, X isoform OS=Bos taurus OX=9913 GN=AMELX PE=1 SV=2	1	hf1_10472_ebo_22_1_261219.ScanId;v=1;d1=25971.25971.3	controllerType=0 controllerNumber=1 scan=25971	53.8397
35471:3	1	S.M[+15.995]PLPPHPGHPGYINFS[+79.966]YEVLTPLKWY.Q		M[+16], S[+80]	1050.51	3	3149.52	3149.5	0	6.5	17	Non	941.29	941.29	12.8	15.79	1032	>sp|P02817|AMELX_BOVIN Amelogenin, X isoform OS=Bos taurus OX=9913 GN=AMELX PE=1 SV=2	1	hf1_10472_ebo_22_1_261219.ScanId;v=1;d1=26163.26163.3	controllerType=0 controllerNumber=1 scan=26163	54.1838
36364:5	1	S.MPLPPHPGHPGY[+15.995]INF[+31.990]SY[+31.990]EVLTPLKWY.Q		F[+32], Y[+16][+32]	627.511	5	3133.53	3133.51	0	4.6	17	Non	12.92	12.92	12.92	2.11	1032	>sp|P02817|AMELX_BOVIN Amelogenin, X isoform OS=Bos taurus OX=9913 GN=AMELX PE=1 SV=2	1	hf1_10472_ebo_22_1_261219.ScanId;v=1;d1=26740.26740.5	controllerType=0 controllerNumber=1 scan=26740	55.2103
31966:3	1	S.MP[+15.995]LPPHPGHPGYINFS[+79.966]YEVLTPLKW[+15.995]Y.Q		P[+16], S[+80], W[+16]	1055.84	3	3165.52	3165.49	0	6.8	17	Non	32.33	32.33	0	2.11	1032	>sp|P02817|AMELX_BOVIN Amelogenin, X isoform OS=Bos taurus OX=9913 GN=AMELX PE=1 SV=2	1	hf1_10472_ebo_22_1_261219.ScanId;v=1;d1=23819.23819.3	controllerType=0 controllerNumber=1 scan=23819	50.0093
36695:4	1	S.MP[+15.995]LPPHPGHPGYIN[+0.984]FS[+79.966]YEVLTPLKWY.Q		N[+1], P[+16], S[+80]	788.384	4	3150.51	3150.48	0	9.7	17	Non	43.17	43.17	5.8	1.8	1032	>sp|P02817|AMELX_BOVIN Amelogenin, X isoform OS=Bos taurus OX=9913 GN=AMELX PE=1 SV=2	1	hf1_10472_ebo_22_1_261219.ScanId;v=1;d1=26963.26963.4	controllerType=0 controllerNumber=1 scan=26963	55.6075
34816:4	1	S.MP[+15.995]LPPHPGHPGYINFS[+79.966]YEVLTPLKWY[+31.990].Q		P[+16], S[+80], Y[+32]	796.131	4	3181.5	3181.49	0	3.9	17	Non	62.82	62.82	0	2.1	1032	>sp|P02817|AMELX_BOVIN Amelogenin, X isoform OS=Bos taurus OX=9913 GN=AMELX PE=1 SV=2	1	hf1_10472_ebo_22_1_261219.ScanId;v=1;d1=25717.25717.4	controllerType=0 controllerNumber=1 scan=25717	53.3894
34871:4	1	S.MP[+15.995]LPPHPGHPGYINFS[+79.966]YEVLTPLKWY[+31.990].Q		P[+16], S[+80], Y[+32]	796.133	4	3181.51	3181.49	0	6.3	17	Non	69.01	69.01	0	2.1	1032	>sp|P02817|AMELX_BOVIN Amelogenin, X isoform OS=Bos taurus OX=9913 GN=AMELX PE=1 SV=2	1	hf1_10472_ebo_22_1_261219.ScanId;v=1;d1=25754.25754.4	controllerType=0 controllerNumber=1 scan=25754	53.4534
35107:3	1	S.MP[+15.995]LPP[+15.995]HPGHPGYINFS[+79.966]YEVLTPLKWY.Q		P[+16]*2, S[+80]	1055.84	3	3165.52	3165.49	0	7.8	17	Non	76.02	76.02	0	2.35	1032	>sp|P02817|AMELX_BOVIN Amelogenin, X isoform OS=Bos taurus OX=9913 GN=AMELX PE=1 SV=2	1	hf1_10472_ebo_22_1_261219.ScanId;v=1;d1=25917.25917.3	controllerType=0 controllerNumber=1 scan=25917	53.7439
31673:3	1	S.MP[+15.995]LPPHPGHPGYINFS[+79.966]YEVLTPLKWY[+31.990].Q		P[+16], S[+80], Y[+32]	1061.17	3	3181.51	3181.49	0	6	17	Non	86.2	86.2	4	2.12	1032	>sp|P02817|AMELX_BOVIN Amelogenin, X isoform OS=Bos taurus OX=9913 GN=AMELX PE=1 SV=2	1	hf1_10472_ebo_22_1_261219.ScanId;v=1;d1=23624.23624.3	controllerType=0 controllerNumber=1 scan=23624	49.664
31671:3	1	S.MP[+15.995]LPPHPGHPGYINFS[+79.966]YEVLTPLKW[+15.995]Y.Q		P[+16], S[+80], W[+16]	1055.84	3	3165.52	3165.49	0	8	17	Non	90.16	90.16	0	2.35	1032	>sp|P02817|AMELX_BOVIN Amelogenin, X isoform OS=Bos taurus OX=9913 GN=AMELX PE=1 SV=2	1	hf1_10472_ebo_22_1_261219.ScanId;v=1;d1=23623.23623.3	controllerType=0 controllerNumber=1 scan=23623	49.6625
34000:4	1	S.MP[+15.995]LPPHPGHPGYINFS[+79.966]YEVLTPLKW[+31.990]Y.Q		P[+16], S[+80], W[+32]	796.132	4	3181.51	3181.49	0	5	17	Non	96.33	96.33	0	2.12	1032	>sp|P02817|AMELX_BOVIN Amelogenin, X isoform OS=Bos taurus OX=9913 GN=AMELX PE=1 SV=2	1	hf1_10472_ebo_22_1_261219.ScanId;v=1;d1=25168.25168.4	controllerType=0 controllerNumber=1 scan=25168	52.4051
31660:4	1	S.MP[+15.995]LPPHPGHPGYINFS[+79.966]YEVLTPLKW[+15.995]Y.Q		P[+16], S[+80], W[+16]	792.134	4	3165.51	3165.49	0	6.3	17	Non	111.36	111.36	4	2.35	1032	>sp|P02817|AMELX_BOVIN Amelogenin, X isoform OS=Bos taurus OX=9913 GN=AMELX PE=1 SV=2	1	hf1_10472_ebo_22_1_261219.ScanId;v=1;d1=23616.23616.4	controllerType=0 controllerNumber=1 scan=23616	49.6491
32597:4	1	S.MP[+15.995]LPPHPGHPGYINFS[+79.966]YEVLTPLKW[+15.995]Y.Q		P[+16], S[+80], W[+16]	792.133	4	3165.51	3165.49	0	5.2	17	Non	141.4	141.4	0.27	2.93	1032	>sp|P02817|AMELX_BOVIN Amelogenin, X isoform OS=Bos taurus OX=9913 GN=AMELX PE=1 SV=2	1	hf1_10472_ebo_22_1_261219.ScanId;v=1;d1=24230.24230.4	controllerType=0 controllerNumber=1 scan=24230	50.7337
33690:4	1	S.MP[+15.995]LPPHPGHPGYINFS[+79.966]YEVLTPLKW[+15.995]Y.Q		P[+16], S[+80], W[+16]	792.133	4	3165.51	3165.49	0	5.5	17	Non	170.04	170.04	5.8	3.01	1032	>sp|P02817|AMELX_BOVIN Amelogenin, X isoform OS=Bos taurus OX=9913 GN=AMELX PE=1 SV=2	1	hf1_10472_ebo_22_1_261219.ScanId;v=1;d1=24957.24957.4	controllerType=0 controllerNumber=1 scan=24957	52.0231
34776:4	1	S.MP[+15.995]LPPHPGHPGY[+15.995]INFS[+79.966]YEVLTPLKWY.Q		P[+16], S[+80], Y[+16]	792.134	4	3165.51	3165.49	0	6.3	17	Non	185.4	185.4	0.06	3.97	1032	>sp|P02817|AMELX_BOVIN Amelogenin, X isoform OS=Bos taurus OX=9913 GN=AMELX PE=1 SV=2	1	hf1_10472_ebo_22_1_261219.ScanId;v=1;d1=25690.25690.4	controllerType=0 controllerNumber=1 scan=25690	53.3401
35156:4	1	S.MP[+15.995]LPPHPGHPGYINFS[+79.966]YEVLTPLKW[+31.990]Y.Q		P[+16], S[+80], W[+32]	796.128	4	3181.49	3181.49	0	0.7	17	Non	207.65	207.65	5.8	3.12	1032	>sp|P02817|AMELX_BOVIN Amelogenin, X isoform OS=Bos taurus OX=9913 GN=AMELX PE=1 SV=2	1	hf1_10472_ebo_22_1_261219.ScanId;v=1;d1=25950.25950.4	controllerType=0 controllerNumber=1 scan=25950	53.8023
34583:4	1	S.MP[+15.995]LPPHPGHPGYINFS[+79.966]YEVLTPLKW[+31.990]Y.Q		P[+16], S[+80], W[+32]	796.132	4	3181.51	3181.49	0	5.4	17	Non	225.99	225.99	4	4.01	1032	>sp|P02817|AMELX_BOVIN Amelogenin, X isoform OS=Bos taurus OX=9913 GN=AMELX PE=1 SV=2	1	hf1_10472_ebo_22_1_261219.ScanId;v=1;d1=25557.25557.4	controllerType=0 controllerNumber=1 scan=25557	53.1004
35066:4	1	S.MP[+15.995]LPPHPGHPGYINF[+15.995]S[+79.966]YEVLTPLKWY.Q		F[+16], P[+16], S[+80]	792.134	4	3165.52	3165.49	0	6.7	17	Non	229.86	229.86	5.8	4.27	1032	>sp|P02817|AMELX_BOVIN Amelogenin, X isoform OS=Bos taurus OX=9913 GN=AMELX PE=1 SV=2	1	hf1_10472_ebo_22_1_261219.ScanId;v=1;d1=25886.25886.4	controllerType=0 controllerNumber=1 scan=25886	53.6894
36108:4	1	S.MP[+15.995]LPPHPGHPGYIN[+0.984]FS[+79.966]YEVLTPLKWY.Q		N[+1], P[+16], S[+80]	788.383	4	3150.51	3150.48	0	8.6	17	Non	259.71	259.71	5.8	4.28	1032	>sp|P02817|AMELX_BOVIN Amelogenin, X isoform OS=Bos taurus OX=9913 GN=AMELX PE=1 SV=2	1	hf1_10472_ebo_22_1_261219.ScanId;v=1;d1=26573.26573.4	controllerType=0 controllerNumber=1 scan=26573	54.9146
33384:4	1	S.MP[+15.995]LPPHPGHPGYINFS[+79.966]YEVLTPLKW[+15.995]Y.Q		P[+16], S[+80], W[+16]	792.134	4	3165.51	3165.49	0	6.4	17	Non	261.21	261.21	5.8	5.08	1032	>sp|P02817|AMELX_BOVIN Amelogenin, X isoform OS=Bos taurus OX=9913 GN=AMELX PE=1 SV=2	1	hf1_10472_ebo_22_1_261219.ScanId;v=1;d1=24755.24755.4	controllerType=0 controllerNumber=1 scan=24755	51.6666
36380:3	1	S.MP[+15.995]LPPHPGHPGYIN[+0.984]FS[+79.966]YEVLTPLKWY.Q		N[+1], P[+16], S[+80]	1050.84	3	3150.51	3150.48	0	8.1	17	Non	308.72	308.72	20.78	5.02	1032	>sp|P02817|AMELX_BOVIN Amelogenin, X isoform OS=Bos taurus OX=9913 GN=AMELX PE=1 SV=2	1	hf1_10472_ebo_22_1_261219.ScanId;v=1;d1=26751.26751.3	controllerType=0 controllerNumber=1 scan=26751	55.2298
35812:4	1	S.MP[+15.995]LPPHPGHPGYIN[+0.984]FS[+79.966]YEVLTPLKWY.Q		N[+1], P[+16], S[+80]	788.383	4	3150.51	3150.48	0	8.9	17	Non	314.95	314.95	5.8	4.87	1032	>sp|P02817|AMELX_BOVIN Amelogenin, X isoform OS=Bos taurus OX=9913 GN=AMELX PE=1 SV=2	1	hf1_10472_ebo_22_1_261219.ScanId;v=1;d1=26381.26381.4	controllerType=0 controllerNumber=1 scan=26381	54.5719
34286:4	1	S.MP[+15.995]LPPHPGHPGYINFS[+79.966]YEVLTPLKW[+31.990]Y.Q		P[+16], S[+80], W[+32]	796.133	4	3181.51	3181.49	0	6.6	17	Non	339.35	339.35	4	5.85	1032	>sp|P02817|AMELX_BOVIN Amelogenin, X isoform OS=Bos taurus OX=9913 GN=AMELX PE=1 SV=2	1	hf1_10472_ebo_22_1_261219.ScanId;v=1;d1=25359.25359.4	controllerType=0 controllerNumber=1 scan=25359	52.7477
34656:3	1	S.MP[+15.995]LPPHPGHPGYINFS[+79.966]YEVLTPLKW[+31.990]Y.Q		P[+16], S[+80], W[+32]	1061.17	3	3181.51	3181.49	0	5.2	17	Non	474.95	474.95	0	6.79	1032	>sp|P02817|AMELX_BOVIN Amelogenin, X isoform OS=Bos taurus OX=9913 GN=AMELX PE=1 SV=2	1	hf1_10472_ebo_22_1_261219.ScanId;v=1;d1=25604.25604.3	controllerType=0 controllerNumber=1 scan=25604	53.1856
36073:3	1	S.M[+15.995]PLPPHPGHPGYIN[+0.984]FS[+79.966]YEVLTPLKWY.Q		M[+16], N[+1], S[+80]	1050.84	3	3150.51	3150.48	0	9.1	17	Non	800.24	800.24	6.16	12.99	1032	>sp|P02817|AMELX_BOVIN Amelogenin, X isoform OS=Bos taurus OX=9913 GN=AMELX PE=1 SV=2	1	hf1_10472_ebo_22_1_261219.ScanId;v=1;d1=26551.26551.3	controllerType=0 controllerNumber=1 scan=26551	54.8754
35778:3	1	S.M[+15.995]PLPPHPGHPGYIN[+0.984]FS[+79.966]YEVLTPLKWY.Q		M[+16], N[+1], S[+80]	1050.84	3	3150.51	3150.48	0	8.7	17	Non	847.37	847.37	20.24	12.99	1032	>sp|P02817|AMELX_BOVIN Amelogenin, X isoform OS=Bos taurus OX=9913 GN=AMELX PE=1 SV=2	1	hf1_10472_ebo_22_1_261219.ScanId;v=1;d1=26359.26359.3	controllerType=0 controllerNumber=1 scan=26359	54.5327
34075:3	1	S.M[+15.995]PLPPHPGHPGYINFS[+79.966]YEVLTPLKW[+31.990]Y.Q		M[+16], S[+80], W[+32]	1061.17	3	3181.51	3181.49	0	6.6	17	Non	933.13	933.13	0	15.79	1032	>sp|P02817|AMELX_BOVIN Amelogenin, X isoform OS=Bos taurus OX=9913 GN=AMELX PE=1 SV=2	1	hf1_10472_ebo_22_1_261219.ScanId;v=1;d1=25219.25219.3	controllerType=0 controllerNumber=1 scan=25219	52.4982
34373:3	1	S.M[+15.995]PLPPHPGHPGYINFS[+79.966]YEVLTPLKWY[+31.990].Q		M[+16], S[+80], Y[+32]	1061.18	3	3181.51	3181.49	0	6.7	17	Non	942.13	942.13	0	15.79	1032	>sp|P02817|AMELX_BOVIN Amelogenin, X isoform OS=Bos taurus OX=9913 GN=AMELX PE=1 SV=2	1	hf1_10472_ebo_22_1_261219.ScanId;v=1;d1=25414.25414.3	controllerType=0 controllerNumber=1 scan=25414	52.8449
39118:4	1	S.MP[+15.995]LP[+31.990]P[+15.995]HP[+31.990]GHPGYINFSYEVLTPLKWY.Q		P[+16]*2[+32]*2	788.136	4	3149.52	3149.51	0	4.4	17	Non	45.08	45.08	0	2.12	1032	>sp|P02817|AMELX_BOVIN Amelogenin, X isoform OS=Bos taurus OX=9913 GN=AMELX PE=1 SV=2	1	hf1_10472_ebo_22_1_261219.ScanId;v=1;d1=28555.28555.4	controllerType=0 controllerNumber=1 scan=28555	58.4469
37627:4	1	S.MPLPPHPGHPGY[+15.995]IN[+0.984]F[+31.990]SY[+31.990]EVLTPLKWY.Q		F[+32], N[+1], Y[+16][+32]	784.381	4	3134.5	3134.5	0	2.1	17	Non	86.15	86.15	16.57	2.12	1032	>sp|P02817|AMELX_BOVIN Amelogenin, X isoform OS=Bos taurus OX=9913 GN=AMELX PE=1 SV=2	1	hf1_10472_ebo_22_1_261219.ScanId;v=1;d1=27573.27573.4	controllerType=0 controllerNumber=1 scan=27573	56.6953
37958:4	1	S.MP[+15.995]LPPHPGHP[+31.990]GY[+15.995]INF[+31.990]SYEVLTPLKWY.Q		F[+32], P[+16][+32], Y[+16]	788.135	4	3149.52	3149.51	0	3.9	17	Non	97.98	97.98	0	2.16	1032	>sp|P02817|AMELX_BOVIN Amelogenin, X isoform OS=Bos taurus OX=9913 GN=AMELX PE=1 SV=2	1	hf1_10472_ebo_22_1_261219.ScanId;v=1;d1=27794.27794.4	controllerType=0 controllerNumber=1 scan=27794	57.0885
37011:4	1	S.MP[+15.995]LPPHPGHPGY[+15.995]INF[+31.990]SY[+31.990]EVLTPLKWY.Q		F[+32], P[+16], Y[+16][+32]	788.136	4	3149.52	3149.51	0	4.3	17	Non	110.96	110.96	5.8	2.25	1032	>sp|P02817|AMELX_BOVIN Amelogenin, X isoform OS=Bos taurus OX=9913 GN=AMELX PE=1 SV=2	1	hf1_10472_ebo_22_1_261219.ScanId;v=1;d1=27166.27166.4	controllerType=0 controllerNumber=1 scan=27166	55.9685
34599:4	1	S.MP[+15.995]LPPHPGHPGYINF[+31.990]SY[+31.990]EVLTPLKW[+15.995]Y.Q		F[+32], P[+16], W[+16], Y[+32]	788.135	4	3149.52	3149.51	0	3.7	17	Non	147.87	147.87	2.33	2.24	1032	>sp|P02817|AMELX_BOVIN Amelogenin, X isoform OS=Bos taurus OX=9913 GN=AMELX PE=1 SV=2	1	hf1_10472_ebo_22_1_261219.ScanId;v=1;d1=25568.25568.4	controllerType=0 controllerNumber=1 scan=25568	53.1199
35157:4	1	S.MP[+15.995]LPPHPGHPGYIN[+0.984]FS[+79.966]YEVLTPLKW[+31.990]Y.Q		N[+1], P[+16], S[+80], W[+32]	796.379	4	3182.49	3182.47	0	6.8	17	Non	220.8	220.8	5.8	4.27	1032	>sp|P02817|AMELX_BOVIN Amelogenin, X isoform OS=Bos taurus OX=9913 GN=AMELX PE=1 SV=2	1	hf1_10472_ebo_22_1_261219.ScanId;v=1;d1=25950.25950.4	controllerType=0 controllerNumber=1 scan=25950	53.8023
35233:3	1	S.MP[+15.995]LPPHPGHPGYIN[+0.984]FS[+79.966]YEVLTPLKWY[+31.990].Q		N[+1], P[+16], S[+80], Y[+32]	1061.5	3	3182.49	3182.47	0	4	17	Non	389.04	389.04	0	7.15	1032	>sp|P02817|AMELX_BOVIN Amelogenin, X isoform OS=Bos taurus OX=9913 GN=AMELX PE=1 SV=2	1	hf1_10472_ebo_22_1_261219.ScanId;v=1;d1=26004.26004.3	controllerType=0 controllerNumber=1 scan=26004	53.898
34941:3	1	S.M[+15.995]PLPPHPGHPGYIN[+0.984]FS[+79.966]YEVLTPLKWY[+31.990].Q		M[+16], N[+1], S[+80], Y[+32]	1061.5	3	3182.49	3182.47	0	6.3	17	Non	654.99	654.99	0	10.79	1032	>sp|P02817|AMELX_BOVIN Amelogenin, X isoform OS=Bos taurus OX=9913 GN=AMELX PE=1 SV=2	1	hf1_10472_ebo_22_1_261219.ScanId;v=1;d1=25803.25803.3	controllerType=0 controllerNumber=1 scan=25803	53.5412
32356:4	1	S.M[+15.995]PLPPHPGHPGYINFSYEVLTPLKWYQ.S		M[+16]	800.156	4	3197.6	3197.59	0	3.6	17	Non	111.36	111.36	5.39	2.37	1032	>sp|P02817|AMELX_BOVIN Amelogenin, X isoform OS=Bos taurus OX=9913 GN=AMELX PE=1 SV=2	1	hf1_10472_ebo_22_1_261219.ScanId;v=1;d1=24077.24077.4	controllerType=0 controllerNumber=1 scan=24077	50.4623
35316:4	1	S.MPLPPHPGHPGYINFS[+79.966]YEVLTPLKWYQ.S		S[+80]	816.151	4	3261.58	3261.56	0	5.9	17	Non	197.06	197.06	17.05	3.71	1032	>sp|P02817|AMELX_BOVIN Amelogenin, X isoform OS=Bos taurus OX=9913 GN=AMELX PE=1 SV=2	1	hf1_10472_ebo_22_1_261219.ScanId;v=1;d1=26060.26060.4	controllerType=0 controllerNumber=1 scan=26060	53.9996
35032:4	1	S.MPLPPHPGHPGYINFS[+79.966]YEVLTPLKWYQ.S		S[+80]	816.152	4	3261.58	3261.56	0	6.5	17	Non	272.5	272.5	83.11	5.32	1032	>sp|P02817|AMELX_BOVIN Amelogenin, X isoform OS=Bos taurus OX=9913 GN=AMELX PE=1 SV=2	1	hf1_10472_ebo_22_1_261219.ScanId;v=1;d1=25865.25865.4	controllerType=0 controllerNumber=1 scan=25865	53.6519
33710:3	1	S.MP[+15.995]LPPHPGHPGYINFS[+79.966]YEVLTPLKWYQ.S		P[+16], S[+80]	1093.2	3	3277.57	3277.56	0	4	17	Non	192.65	192.65	1.03	3.3	1032	>sp|P02817|AMELX_BOVIN Amelogenin, X isoform OS=Bos taurus OX=9913 GN=AMELX PE=1 SV=2	1	hf1_10472_ebo_22_1_261219.ScanId;v=1;d1=24969.24969.4	controllerType=0 controllerNumber=1 scan=24969	52.044
33739:4	1	S.MP[+15.995]LPPHPGHPGYINFS[+79.966]YEVLTPLKWYQ.S		P[+16], S[+80]	820.149	4	3277.58	3277.56	0	5.3	17	Non	245.49	245.49	4	5.06	1032	>sp|P02817|AMELX_BOVIN Amelogenin, X isoform OS=Bos taurus OX=9913 GN=AMELX PE=1 SV=2	1	hf1_10472_ebo_22_1_261219.ScanId;v=1;d1=24988.24988.4	controllerType=0 controllerNumber=1 scan=24988	52.0781
34017:4	1	S.M[+15.995]PLPPHPGHPGYINFS[+79.966]YEVLTPLKWYQ.S		M[+16], S[+80]	820.149	4	3277.58	3277.56	0	5.5	17	Non	297.24	297.24	5.24	5.38	1032	>sp|P02817|AMELX_BOVIN Amelogenin, X isoform OS=Bos taurus OX=9913 GN=AMELX PE=1 SV=2	1	hf1_10472_ebo_22_1_261219.ScanId;v=1;d1=25178.25178.4	controllerType=0 controllerNumber=1 scan=25178	52.423
33736:3	1	S.MP[+15.995]LPPHPGHPGYINFS[+79.966]YEVLTPLKWYQ.S		P[+16], S[+80]	1093.2	3	3277.58	3277.56	0	5.2	17	Non	517.09	517.09	4.3	7.67	1032	>sp|P02817|AMELX_BOVIN Amelogenin, X isoform OS=Bos taurus OX=9913 GN=AMELX PE=1 SV=2	1	hf1_10472_ebo_22_1_261219.ScanId;v=1;d1=24986.24986.3	controllerType=0 controllerNumber=1 scan=24986	52.0753
33756:3	1	S.M[+15.995]PLPPHPGHPGYINFS[+79.966]YEVLTPLKWYQ.S		M[+16], S[+80]	1093.2	3	3277.58	3277.56	0	7.8	17	Non	839.73	839.73	15.11	13.79	1032	>sp|P02817|AMELX_BOVIN Amelogenin, X isoform OS=Bos taurus OX=9913 GN=AMELX PE=1 SV=2	1	hf1_10472_ebo_22_1_261219.ScanId;v=1;d1=25000.25000.3	controllerType=0 controllerNumber=1 scan=25000	52.099
34035:3	1	S.M[+15.995]PLPPHPGHPGYINFS[+79.966]YEVLTPLKWYQ.S		M[+16], S[+80]	1093.2	3	3277.58	3277.56	0	7.1	17	Non	869.62	869.62	9.88	14.79	1032	>sp|P02817|AMELX_BOVIN Amelogenin, X isoform OS=Bos taurus OX=9913 GN=AMELX PE=1 SV=2	1	hf1_10472_ebo_22_1_261219.ScanId;v=1;d1=25189.25189.3	controllerType=0 controllerNumber=1 scan=25189	52.4424
34390:4	1	S.MP[+15.995]LPPHPGHPGYINFS[+79.966]YEVLTPLKWYQ[+0.984].S		P[+16], Q[+1], S[+80]	820.398	4	3278.57	3278.54	0	7.9	17	Non	76.17	76.17	4	2.14	1032	>sp|P02817|AMELX_BOVIN Amelogenin, X isoform OS=Bos taurus OX=9913 GN=AMELX PE=1 SV=2	1	hf1_10472_ebo_22_1_261219.ScanId;v=1;d1=25425.25425.4	controllerType=0 controllerNumber=1 scan=25425	52.8643
35408:4	1	S.MPLP[+15.995]P[+31.990]HPGHPGYINFSY[+31.990]EVLTPLKWYQ.S		P[+16][+32], Y[+32]	816.152	4	3261.59	3261.57	0	4.5	17	Non	119.98	119.98	1.05	2.25	1032	>sp|P02817|AMELX_BOVIN Amelogenin, X isoform OS=Bos taurus OX=9913 GN=AMELX PE=1 SV=2	1	hf1_10472_ebo_22_1_261219.ScanId;v=1;d1=26122.26122.4	controllerType=0 controllerNumber=1 scan=26122	54.1102
33352:3	1	S.MP[+15.995]LPPHPGHPGYINFS[+79.966]YEVLTPLKW[+31.990]YQ.S		P[+16], S[+80], W[+32]	1103.86	3	3309.57	3309.55	0	6	17	Non	156.06	156.06	0	3.16	1032	>sp|P02817|AMELX_BOVIN Amelogenin, X isoform OS=Bos taurus OX=9913 GN=AMELX PE=1 SV=2	1	hf1_10472_ebo_22_1_261219.ScanId;v=1;d1=24736.24736.3	controllerType=0 controllerNumber=1 scan=24736	51.6323
35154:3	1	S.MP[+15.995]LPPHPGHPGYINF[+31.990]SY[+31.990]EVLTPLKWYQ.S		F[+32], P[+16], Y[+32]	1087.87	3	3261.59	3261.57	0	4.5	17	Non	179.59	179.59	4	3.72	1032	>sp|P02817|AMELX_BOVIN Amelogenin, X isoform OS=Bos taurus OX=9913 GN=AMELX PE=1 SV=2	1	hf1_10472_ebo_22_1_261219.ScanId;v=1;d1=25949.25949.4	controllerType=0 controllerNumber=1 scan=25949	53.8008
34671:4	1	S.MP[+15.995]LPPHPGHPGYIN[+0.984]FS[+79.966]YEVLTPLKWYQ.S		N[+1], P[+16], S[+80]	820.396	4	3278.56	3278.54	0	6.1	17	Non	184.49	149.38	4	2.41	1032	>sp|P02817|AMELX_BOVIN Amelogenin, X isoform OS=Bos taurus OX=9913 GN=AMELX PE=1 SV=2	1	hf1_10472_ebo_22_1_261219.ScanId;v=1;d1=25615.25615.4	controllerType=0 controllerNumber=1 scan=25615	53.205
34966:3	1	S.M[+15.995]PLPPHPGHPGYIN[+0.984]FS[+79.966]YEVLTPLKWYQ.S		M[+16], N[+1], S[+80]	1093.53	3	3278.57	3278.54	0	7.6	17	Non	193.11	193.11	14.74	4.39	1032	>sp|P02817|AMELX_BOVIN Amelogenin, X isoform OS=Bos taurus OX=9913 GN=AMELX PE=1 SV=2	1	hf1_10472_ebo_22_1_261219.ScanId;v=1;d1=25820.25820.4	controllerType=0 controllerNumber=1 scan=25820	53.5698
33057:3	1	S.MP[+15.995]LPPHPGHPGYINFS[+79.966]YEVLTPLKW[+31.990]YQ.S		P[+16], S[+80], W[+32]	1103.86	3	3309.57	3309.55	0	7.1	17	Non	216.21	216.21	4	4.69	1032	>sp|P02817|AMELX_BOVIN Amelogenin, X isoform OS=Bos taurus OX=9913 GN=AMELX PE=1 SV=2	1	hf1_10472_ebo_22_1_261219.ScanId;v=1;d1=24536.24536.3	controllerType=0 controllerNumber=1 scan=24536	51.2739
33099:4	1	S.MP[+15.995]LPPHPGHPGYINFS[+79.966]YEVLTPLKW[+31.990]YQ.S		P[+16], S[+80], W[+32]	828.148	4	3309.57	3309.55	0	7.1	17	Non	234.28	234.28	4	4.52	1032	>sp|P02817|AMELX_BOVIN Amelogenin, X isoform OS=Bos taurus OX=9913 GN=AMELX PE=1 SV=2	1	hf1_10472_ebo_22_1_261219.ScanId;v=1;d1=24563.24563.4	controllerType=0 controllerNumber=1 scan=24563	51.3232
34678:3	1	S.M[+15.995]PLPPHPGHPGYIN[+0.984]FS[+79.966]YEVLTPLKWYQ.S		M[+16], N[+1], S[+80]	1093.53	3	3278.57	3278.54	0	9.5	17	Non	674.11	674.11	5.38	9.99	1032	>sp|P02817|AMELX_BOVIN Amelogenin, X isoform OS=Bos taurus OX=9913 GN=AMELX PE=1 SV=2	1	hf1_10472_ebo_22_1_261219.ScanId;v=1;d1=25620.25620.3	controllerType=0 controllerNumber=1 scan=25620	53.2154
35935:3	1	S.MPLPPHPGHP[+15.995]GYIN[+0.984]F[+31.990]SY[+31.990]EVLTPLKWYQ.S		F[+32], N[+1], P[+16], Y[+32]	1088.2	3	3262.58	3262.56	0	7.7	17	Non	182.54	182.54	3.81	4.23	1032	>sp|P02817|AMELX_BOVIN Amelogenin, X isoform OS=Bos taurus OX=9913 GN=AMELX PE=1 SV=2	1	hf1_10472_ebo_22_1_261219.ScanId;v=1;d1=26463.26463.3	controllerType=0 controllerNumber=1 scan=26463	54.7191
33499:3	1	S.MPLPPHPGHPGYINFSYEVLTPLKWYQS.M			1090.22	3	3268.64	3268.63	0	4.5	17	Non	32.36	32.36	32.36	2.03	1032	>sp|P02817|AMELX_BOVIN Amelogenin, X isoform OS=Bos taurus OX=9913 GN=AMELX PE=1 SV=2	1	hf1_10472_ebo_22_1_261219.ScanId;v=1;d1=24827.24827.4	controllerType=0 controllerNumber=1 scan=24827	51.7917
33116:4	1	S.MPLPPHPGHPGYIN[+0.984]FSYEVLTPLKWYQS.M		N[+1]	818.166	4	3269.64	3269.61	0	9.5	17	Non	50.49	50.49	10.95	1.8	1032	>sp|P02817|AMELX_BOVIN Amelogenin, X isoform OS=Bos taurus OX=9913 GN=AMELX PE=1 SV=2	1	hf1_10472_ebo_22_1_261219.ScanId;v=1;d1=24576.24576.4	controllerType=0 controllerNumber=1 scan=24576	51.3457
46086:4	1	S.MPLPPHPGHPGYINFS[+79.966]YEVLTPLKWYQS.M		S[+80]	837.912	4	3348.62	3348.6	0	8.8	17	Non	165.94	165.94	17.72	3.2	1032	>sp|P02817|AMELX_BOVIN Amelogenin, X isoform OS=Bos taurus OX=9913 GN=AMELX PE=1 SV=2	1	hf1_10472_ebo_22_1_261219.ScanId;v=1;d1=34373.34373.4	controllerType=0 controllerNumber=1 scan=34373	73.561
32402:4	1	S.MP[+15.995]LPPHPGHPGYINFSYEVLTPLKWYQS.M		P[+16]	821.915	4	3284.64	3284.62	0	4.3	17	Non	209.44	191.55	4	3.71	1032	>sp|P02817|AMELX_BOVIN Amelogenin, X isoform OS=Bos taurus OX=9913 GN=AMELX PE=1 SV=2	1	hf1_10472_ebo_22_1_261219.ScanId;v=1;d1=24106.24106.4	controllerType=0 controllerNumber=1 scan=24106	50.5138
32079:4	1	S.MP[+15.995]LPPHPGHPGYINFSYEVLTPLKWYQS.M		P[+16]	821.915	4	3284.64	3284.62	0	5.1	17	Non	234.74	234.74	13.81	4.25	1032	>sp|P02817|AMELX_BOVIN Amelogenin, X isoform OS=Bos taurus OX=9913 GN=AMELX PE=1 SV=2	1	hf1_10472_ebo_22_1_261219.ScanId;v=1;d1=23892.23892.4	controllerType=0 controllerNumber=1 scan=23892	50.1365
34701:4	1	S.MPLPPHPGHPGYINFS[+79.966]YEVLTPLKWYQS.M		S[+80]	837.909	4	3348.62	3348.6	0	6.2	17	Non	282.65	282.65	14.69	5.4	1032	>sp|P02817|AMELX_BOVIN Amelogenin, X isoform OS=Bos taurus OX=9913 GN=AMELX PE=1 SV=2	1	hf1_10472_ebo_22_1_261219.ScanId;v=1;d1=25637.25637.4	controllerType=0 controllerNumber=1 scan=25637	53.246
35265:4	1	S.MPLPPHPGHPGYINFS[+79.966]YEVLTPLKWYQS.M		S[+80]	837.909	4	3348.62	3348.6	0	6.1	17	Non	294.91	294.91	44.25	5.38	1032	>sp|P02817|AMELX_BOVIN Amelogenin, X isoform OS=Bos taurus OX=9913 GN=AMELX PE=1 SV=2	1	hf1_10472_ebo_22_1_261219.ScanId;v=1;d1=26025.26025.4	controllerType=0 controllerNumber=1 scan=26025	53.9382
35559:4	1	S.MPLPPHPGHPGYINFS[+79.966]YEVLTPLKWYQS.M		S[+80]	837.907	4	3348.6	3348.6	0	2.8	17	Non	317.71	317.71	11.54	4.95	1032	>sp|P02817|AMELX_BOVIN Amelogenin, X isoform OS=Bos taurus OX=9913 GN=AMELX PE=1 SV=2	1	hf1_10472_ebo_22_1_261219.ScanId;v=1;d1=26219.26219.4	controllerType=0 controllerNumber=1 scan=26219	54.2827
34976:4	1	S.MPLPPHPGHPGYINFS[+79.966]YEVLTPLKWYQS.M		S[+80]	837.91	4	3348.62	3348.6	0	6.4	17	Non	434.09	434.09	80.87	7.19	1032	>sp|P02817|AMELX_BOVIN Amelogenin, X isoform OS=Bos taurus OX=9913 GN=AMELX PE=1 SV=2	1	hf1_10472_ebo_22_1_261219.ScanId;v=1;d1=25828.25828.4	controllerType=0 controllerNumber=1 scan=25828	53.5875
35227:3	1	S.MPLPPHPGHPGYINFS[+79.966]YEVLTPLKWYQS.M		S[+80]	1116.88	3	3348.62	3348.6	0	7.6	17	Non	630.7	630.7	185.7	9.14	1032	>sp|P02817|AMELX_BOVIN Amelogenin, X isoform OS=Bos taurus OX=9913 GN=AMELX PE=1 SV=2	1	hf1_10472_ebo_22_1_261219.ScanId;v=1;d1=26000.26000.3	controllerType=0 controllerNumber=1 scan=26000	53.8919
35522:3	1	S.MPLPPHPGHPGYINFS[+79.966]YEVLTPLKWYQS.M		S[+80]	1116.87	3	3348.61	3348.6	0	4.5	17	Non	635.13	635.13	193.95	9.52	1032	>sp|P02817|AMELX_BOVIN Amelogenin, X isoform OS=Bos taurus OX=9913 GN=AMELX PE=1 SV=2	1	hf1_10472_ebo_22_1_261219.ScanId;v=1;d1=26196.26196.3	controllerType=0 controllerNumber=1 scan=26196	54.2421
34939:3	1	S.MPLPPHPGHPGYINFS[+79.966]YEVLTPLKWYQS.M		S[+80]	1116.88	3	3348.62	3348.6	0	7	17	Non	997.66	997.66	233.68	16.79	1032	>sp|P02817|AMELX_BOVIN Amelogenin, X isoform OS=Bos taurus OX=9913 GN=AMELX PE=1 SV=2	1	hf1_10472_ebo_22_1_261219.ScanId;v=1;d1=25802.25802.3	controllerType=0 controllerNumber=1 scan=25802	53.5397
33829:4	1	S.MPLPPHPGHPGYINFS[+79.966]YEVLTP[+31.990]LKWYQS.M		P[+32], S[+80]	845.906	4	3380.6	3380.59	0	5.2	17	Non	68.64	68.64	27.58	1.5	1032	>sp|P02817|AMELX_BOVIN Amelogenin, X isoform OS=Bos taurus OX=9913 GN=AMELX PE=1 SV=2	1	hf1_10472_ebo_22_1_261219.ScanId;v=1;d1=25052.25052.4	controllerType=0 controllerNumber=1 scan=25052	52.1924
34115:4	1	S.MPLPPHPGHPGYINFS[+79.966]YEVLTP[+31.990]LKWYQS.M		P[+32], S[+80]	845.908	4	3380.61	3380.59	0	7.4	17	Non	78.66	78.66	1.21	2.14	1032	>sp|P02817|AMELX_BOVIN Amelogenin, X isoform OS=Bos taurus OX=9913 GN=AMELX PE=1 SV=2	1	hf1_10472_ebo_22_1_261219.ScanId;v=1;d1=25244.25244.4	controllerType=0 controllerNumber=1 scan=25244	52.5411
46128:4	1	S.MP[+15.995]LPPHPGHPGYINFS[+79.966]YEVLTPLKWYQS.M		P[+16], S[+80]	841.911	4	3364.62	3364.59	0	9.9	17	Non	82.01	82.01	4	2.33	1032	>sp|P02817|AMELX_BOVIN Amelogenin, X isoform OS=Bos taurus OX=9913 GN=AMELX PE=1 SV=2	1	hf1_10472_ebo_22_1_261219.ScanId;v=1;d1=34407.34407.4	controllerType=0 controllerNumber=1 scan=34407	73.6213
35870:4	1	S.MPLPPHPGHPGYIN[+0.984]FS[+79.966]YEVLTPLKWYQS.M		N[+1], S[+80]	838.155	4	3349.6	3349.58	0	5.8	17	Non	131.66	131.66	36.43	2.16	1032	>sp|P02817|AMELX_BOVIN Amelogenin, X isoform OS=Bos taurus OX=9913 GN=AMELX PE=1 SV=2	1	hf1_10472_ebo_22_1_261219.ScanId;v=1;d1=26420.26420.4	controllerType=0 controllerNumber=1 scan=26420	54.6424
34972:4	1	S.MP[+15.995]LPPHPGHPGYINFS[+79.966]YEVLTPLKWYQS.M		P[+16], S[+80]	841.904	4	3364.59	3364.59	0	0.9	17	Non	164.76	164.76	5.8	2.36	1032	>sp|P02817|AMELX_BOVIN Amelogenin, X isoform OS=Bos taurus OX=9913 GN=AMELX PE=1 SV=2	1	hf1_10472_ebo_22_1_261219.ScanId;v=1;d1=25825.25825.4	controllerType=0 controllerNumber=1 scan=25825	53.5802
35038:3	1	S.MP[+15.995]LPPHPGHPGYINFS[+79.966]YEVLTPLKWYQS.M		P[+16], S[+80]	1122.2	3	3364.58	3364.59	0	-3	17	Non	195.3	195.3	4	2.59	1032	>sp|P02817|AMELX_BOVIN Amelogenin, X isoform OS=Bos taurus OX=9913 GN=AMELX PE=1 SV=2	1	hf1_10472_ebo_22_1_261219.ScanId;v=1;d1=25868.25868.3	controllerType=0 controllerNumber=1 scan=25868	53.6565
34112:4	1	S.MP[+15.995]LPPHPGHPGYINFS[+79.966]YEVLTPLKWYQS.M		P[+16], S[+80]	841.908	4	3364.61	3364.59	0	6.4	17	Non	266.48	60.79	4	3.54	1032	>sp|P02817|AMELX_BOVIN Amelogenin, X isoform OS=Bos taurus OX=9913 GN=AMELX PE=1 SV=2	1	hf1_10472_ebo_22_1_261219.ScanId;v=1;d1=25241.25241.4	controllerType=0 controllerNumber=1 scan=25241	52.5365
35560:4	1	S.MPLPPHPGHPGYINFS[+79.966]YEVLTPLKWYQ[+0.984]S.M		Q[+1], S[+80]	838.157	4	3349.61	3349.58	0	7.9	17	Non	290.79	290.79	66.49	5.4	1032	>sp|P02817|AMELX_BOVIN Amelogenin, X isoform OS=Bos taurus OX=9913 GN=AMELX PE=1 SV=2	1	hf1_10472_ebo_22_1_261219.ScanId;v=1;d1=26219.26219.4	controllerType=0 controllerNumber=1 scan=26219	54.2827
33531:4	1	S.MP[+15.995]LPPHPGHPGYINFS[+79.966]YEVLTPLKWYQS.M		P[+16], S[+80]	841.909	4	3364.61	3364.59	0	6.6	17	Non	292.92	292.92	4	5.65	1032	>sp|P02817|AMELX_BOVIN Amelogenin, X isoform OS=Bos taurus OX=9913 GN=AMELX PE=1 SV=2	1	hf1_10472_ebo_22_1_261219.ScanId;v=1;d1=24847.24847.4	controllerType=0 controllerNumber=1 scan=24847	51.8271
33819:4	1	S.MP[+15.995]LPPHPGHPGYINFS[+79.966]YEVLTPLKWYQS.M		P[+16], S[+80]	841.908	4	3364.61	3364.59	0	5.6	17	Non	333.21	333.21	4	5.58	1032	>sp|P02817|AMELX_BOVIN Amelogenin, X isoform OS=Bos taurus OX=9913 GN=AMELX PE=1 SV=2	1	hf1_10472_ebo_22_1_261219.ScanId;v=1;d1=25044.25044.4	controllerType=0 controllerNumber=1 scan=25044	52.1776
35820:3	1	S.MPLPPHPGHPGYIN[+0.984]FS[+79.966]YEVLTPLKWYQS.M		N[+1], S[+80]	1117.21	3	3349.61	3349.58	0	8	17	Non	448.53	448.53	92.05	6.92	1032	>sp|P02817|AMELX_BOVIN Amelogenin, X isoform OS=Bos taurus OX=9913 GN=AMELX PE=1 SV=2	1	hf1_10472_ebo_22_1_261219.ScanId;v=1;d1=26387.26387.3	controllerType=0 controllerNumber=1 scan=26387	54.5838
35523:3	1	S.MPLPPHPGHPGYINFS[+79.966]YEVLTPLKWYQ[+0.984]S.M		Q[+1], S[+80]	1117.21	3	3349.61	3349.58	0	9.1	17	Non	643.12	643.12	81.85	8.34	1032	>sp|P02817|AMELX_BOVIN Amelogenin, X isoform OS=Bos taurus OX=9913 GN=AMELX PE=1 SV=2	1	hf1_10472_ebo_22_1_261219.ScanId;v=1;d1=26196.26196.3	controllerType=0 controllerNumber=1 scan=26196	54.2421
34151:3	1	S.M[+15.995]PLPPHPGHPGYINFS[+79.966]YEVLTPLKWYQS.M		M[+16], S[+80]	1122.21	3	3364.61	3364.59	0	5.8	17	Non	661.04	661.04	9	10.52	1032	>sp|P02817|AMELX_BOVIN Amelogenin, X isoform OS=Bos taurus OX=9913 GN=AMELX PE=1 SV=2	1	hf1_10472_ebo_22_1_261219.ScanId;v=1;d1=25269.25269.3	controllerType=0 controllerNumber=1 scan=25269	52.5869
33862:3	1	S.M[+15.995]PLPPHPGHPGYINFS[+79.966]YEVLTPLKWYQS.M		M[+16], S[+80]	1122.21	3	3364.61	3364.59	0	6	17	Non	925.61	925.61	5.41	15.52	1032	>sp|P02817|AMELX_BOVIN Amelogenin, X isoform OS=Bos taurus OX=9913 GN=AMELX PE=1 SV=2	1	hf1_10472_ebo_22_1_261219.ScanId;v=1;d1=25074.25074.3	controllerType=0 controllerNumber=1 scan=25074	52.2334
33580:3	1	S.M[+15.995]PLPPHPGHPGYINFS[+79.966]YEVLTPLKWYQS.M		M[+16], S[+80]	1122.21	3	3364.61	3364.59	0	7	17	Non	1045.3	1045.3	5.47	17.79	1032	>sp|P02817|AMELX_BOVIN Amelogenin, X isoform OS=Bos taurus OX=9913 GN=AMELX PE=1 SV=2	1	hf1_10472_ebo_22_1_261219.ScanId;v=1;d1=24880.24880.3	controllerType=0 controllerNumber=1 scan=24880	51.8854
32075:4	1	S.MP[+15.995]LPPHPGHPGYINFS[+79.966]YEVLTPLKWY[+15.995]QS.M		P[+16], S[+80], Y[+16]	845.906	4	3380.6	3380.59	0	5.1	17	Non	15.05	15.05	0	2	1032	>sp|P02817|AMELX_BOVIN Amelogenin, X isoform OS=Bos taurus OX=9913 GN=AMELX PE=1 SV=2	1	hf1_10472_ebo_22_1_261219.ScanId;v=1;d1=23890.23890.4	controllerType=0 controllerNumber=1 scan=23890	50.1335
33145:3	1	S.MP[+15.995]LPPHPGHPGYINF[+15.995]S[+79.966]YEVLTPLKWYQS.M		F[+16], P[+16], S[+80]	1127.54	3	3380.6	3380.59	0	5.2	17	Non	30.6	30.6	0	2.35	1032	>sp|P02817|AMELX_BOVIN Amelogenin, X isoform OS=Bos taurus OX=9913 GN=AMELX PE=1 SV=2	1	hf1_10472_ebo_22_1_261219.ScanId;v=1;d1=24593.24593.3	controllerType=0 controllerNumber=1 scan=24593	51.3742
34826:5	1	S.MPLPPHPGHP[+15.995]GYINF[+31.990]SY[+31.990]EVLTPLKWYQS.M		F[+32], P[+16], Y[+32]	670.529	5	3348.62	3348.6	0	4.1	17	Non	58.59	58.59	0	2.11	1032	>sp|P02817|AMELX_BOVIN Amelogenin, X isoform OS=Bos taurus OX=9913 GN=AMELX PE=1 SV=2	1	hf1_10472_ebo_22_1_261219.ScanId;v=1;d1=25725.25725.5	controllerType=0 controllerNumber=1 scan=25725	53.4042
32580:4	1	S.MP[+15.995]LPPHPGHPGYINFS[+79.966]YEVLTPLKWY[+31.990]QS.M		P[+16], S[+80], Y[+32]	849.904	4	3396.6	3396.58	0	4.7	17	Non	99.8	99.8	0	2.12	1032	>sp|P02817|AMELX_BOVIN Amelogenin, X isoform OS=Bos taurus OX=9913 GN=AMELX PE=1 SV=2	1	hf1_10472_ebo_22_1_261219.ScanId;v=1;d1=24220.24220.4	controllerType=0 controllerNumber=1 scan=24220	50.7158
34973:4	1	S.MP[+15.995]LPPHPGHPGYIN[+0.984]FS[+79.966]YEVLTPLKWYQS.M		N[+1], P[+16], S[+80]	842.153	4	3365.59	3365.57	0	4.2	17	Non	112.36	105.29	5.8	2.12	1032	>sp|P02817|AMELX_BOVIN Amelogenin, X isoform OS=Bos taurus OX=9913 GN=AMELX PE=1 SV=2	1	hf1_10472_ebo_22_1_261219.ScanId;v=1;d1=25825.25825.4	controllerType=0 controllerNumber=1 scan=25825	53.5802
33198:4	1	S.MP[+15.995]LPPHPGHPGYINF[+15.995]S[+79.966]YEVLTPLKWYQS.M		F[+16], P[+16], S[+80]	845.907	4	3380.61	3380.59	0	6.3	17	Non	209.65	209.65	5.8	3.54	1032	>sp|P02817|AMELX_BOVIN Amelogenin, X isoform OS=Bos taurus OX=9913 GN=AMELX PE=1 SV=2	1	hf1_10472_ebo_22_1_261219.ScanId;v=1;d1=24632.24632.4	controllerType=0 controllerNumber=1 scan=24632	51.447
34691:4	1	S.MP[+15.995]LPPHPGHPGYIN[+0.984]FS[+79.966]YEVLTPLKWYQS.M		N[+1], P[+16], S[+80]	842.155	4	3365.6	3365.57	0	6.8	17	Non	219.31	204.73	5.8	3.54	1032	>sp|P02817|AMELX_BOVIN Amelogenin, X isoform OS=Bos taurus OX=9913 GN=AMELX PE=1 SV=2	1	hf1_10472_ebo_22_1_261219.ScanId;v=1;d1=25629.25629.4	controllerType=0 controllerNumber=1 scan=25629	53.2318
34407:4	1	S.MP[+15.995]LPPHPGHPGYINFS[+79.966]YEVLTPLKWYQ[+0.984]S.M		P[+16], Q[+1], S[+80]	842.155	4	3365.6	3365.57	0	7.1	17	Non	233.51	233.51	4	4.27	1032	>sp|P02817|AMELX_BOVIN Amelogenin, X isoform OS=Bos taurus OX=9913 GN=AMELX PE=1 SV=2	1	hf1_10472_ebo_22_1_261219.ScanId;v=1;d1=25436.25436.4	controllerType=0 controllerNumber=1 scan=25436	52.8838
32161:3	1	S.M[+15.995]PLPPHPGHPGYINFS[+79.966]YEVLTPLK[+15.995]WYQS.M		K[+16], M[+16], S[+80]	1127.54	3	3380.61	3380.59	0	6.3	17	Non	237.39	237.39	0	4.69	1032	>sp|P02817|AMELX_BOVIN Amelogenin, X isoform OS=Bos taurus OX=9913 GN=AMELX PE=1 SV=2	1	hf1_10472_ebo_22_1_261219.ScanId;v=1;d1=23945.23945.3	controllerType=0 controllerNumber=1 scan=23945	50.2299
32873:4	1	S.MP[+15.995]LPPHPGHPGYINFS[+79.966]YEVLTPLKWY[+31.990]QS.M		P[+16], S[+80], Y[+32]	849.907	4	3396.6	3396.58	0	7.2	17	Non	245.65	245.65	0	5.08	1032	>sp|P02817|AMELX_BOVIN Amelogenin, X isoform OS=Bos taurus OX=9913 GN=AMELX PE=1 SV=2	1	hf1_10472_ebo_22_1_261219.ScanId;v=1;d1=24415.24415.4	controllerType=0 controllerNumber=1 scan=24415	51.0623
33444:3	1	S.M[+15.995]PLPPHPGHP[+15.995]GYINFS[+79.966]YEVLTPLKWYQS.M		M[+16], P[+16], S[+80]	1127.54	3	3380.61	3380.59	0	8.2	17	Non	255.23	255.23	12.14	4.69	1032	>sp|P02817|AMELX_BOVIN Amelogenin, X isoform OS=Bos taurus OX=9913 GN=AMELX PE=1 SV=2	1	hf1_10472_ebo_22_1_261219.ScanId;v=1;d1=24790.24790.3	controllerType=0 controllerNumber=1 scan=24790	51.7279
32590:3	1	S.MP[+15.995]LPPHPGHPGYINFS[+79.966]YEVLTPLKWY[+31.990]QS.M		P[+16], S[+80], Y[+32]	1132.87	3	3396.6	3396.58	0	5.2	17	Non	298.6	298.6	0	5.41	1032	>sp|P02817|AMELX_BOVIN Amelogenin, X isoform OS=Bos taurus OX=9913 GN=AMELX PE=1 SV=2	1	hf1_10472_ebo_22_1_261219.ScanId;v=1;d1=24225.24225.3	controllerType=0 controllerNumber=1 scan=24225	50.7233
35039:3	1	S.MP[+15.995]LPPHPGHPGYINFS[+79.966]YEVLTPLKWYQ[+0.984]S.M		P[+16], Q[+1], S[+80]	1122.53	3	3365.59	3365.57	0	3.5	17	Non	352.25	352.25	4	5.3	1032	>sp|P02817|AMELX_BOVIN Amelogenin, X isoform OS=Bos taurus OX=9913 GN=AMELX PE=1 SV=2	1	hf1_10472_ebo_22_1_261219.ScanId;v=1;d1=25868.25868.3	controllerType=0 controllerNumber=1 scan=25868	53.6565
33020:3	1	S.MP[+15.995]LPPHPGHPGYINFS[+79.966]YEVLTPLKWY[+31.990]QS.M		P[+16], S[+80], Y[+32]	1132.87	3	3396.61	3396.58	0	8.7	17	Non	383.73	383.73	0	6.17	1032	>sp|P02817|AMELX_BOVIN Amelogenin, X isoform OS=Bos taurus OX=9913 GN=AMELX PE=1 SV=2	1	hf1_10472_ebo_22_1_261219.ScanId;v=1;d1=24513.24513.4	controllerType=0 controllerNumber=1 scan=24513	51.2335
34739:3	1	S.MP[+15.995]LPPHPGHPGYIN[+0.984]FS[+79.966]YEVLTPLKWYQS.M		N[+1], P[+16], S[+80]	1122.54	3	3365.6	3365.57	0	7.7	17	Non	451.74	451.74	4	7.94	1032	>sp|P02817|AMELX_BOVIN Amelogenin, X isoform OS=Bos taurus OX=9913 GN=AMELX PE=1 SV=2	1	hf1_10472_ebo_22_1_261219.ScanId;v=1;d1=25666.25666.3	controllerType=0 controllerNumber=1 scan=25666	53.2983
32875:3	1	S.MP[+15.995]LPPHPGHPGYINFS[+79.966]YEVLTPLKW[+31.990]YQS.M		P[+16], S[+80], W[+32]	1132.87	3	3396.6	3396.58	0	6.5	17	Non	747.28	747.28	4	11.79	1032	>sp|P02817|AMELX_BOVIN Amelogenin, X isoform OS=Bos taurus OX=9913 GN=AMELX PE=1 SV=2	1	hf1_10472_ebo_22_1_261219.ScanId;v=1;d1=24417.24417.3	controllerType=0 controllerNumber=1 scan=24417	51.0646
34458:3	1	S.M[+15.995]PLPPHPGHPGYIN[+0.984]FS[+79.966]YEVLTPLKWYQS.M		M[+16], N[+1], S[+80]	1122.54	3	3365.6	3365.57	0	7.1	17	Non	868.04	843.74	20.67	14.79	1032	>sp|P02817|AMELX_BOVIN Amelogenin, X isoform OS=Bos taurus OX=9913 GN=AMELX PE=1 SV=2	1	hf1_10472_ebo_22_1_261219.ScanId;v=1;d1=25469.25469.3	controllerType=0 controllerNumber=1 scan=25469	52.9423
35266:4	1	S.MPLPPHPGHP[+31.990]GY[+31.990]IN[+0.984]F[+15.995]SYEVLTPLKWYQS.M		F[+16], N[+1], P[+32], Y[+32]	838.16	4	3349.62	3349.59	0	8.7	17	Non	179.14	179.14	4.14	2.59	1032	>sp|P02817|AMELX_BOVIN Amelogenin, X isoform OS=Bos taurus OX=9913 GN=AMELX PE=1 SV=2	1	hf1_10472_ebo_22_1_261219.ScanId;v=1;d1=26025.26025.4	controllerType=0 controllerNumber=1 scan=26025	53.9382
36445:3	1	S.MPLPPHPGHPGYINFSYEVLTPLKWYQSM.I			1133.9	3	3399.68	3399.67	0	4.3	17	Non	47.89	47.89	47.89	2.63	1032	>sp|P02817|AMELX_BOVIN Amelogenin, X isoform OS=Bos taurus OX=9913 GN=AMELX PE=1 SV=2	1	hf1_10472_ebo_22_1_261219.ScanId;v=1;d1=26791.26791.3	controllerType=0 controllerNumber=1 scan=26791	55.2988
38500:3	1	S.MPLPPHPGHPGYINFS[+79.966]YEVLTPLKWYQSM.I		S[+80]	1160.56	3	3479.66	3479.64	0	7.8	17	Non	174.17	174.17	115.3	4.24	1032	>sp|P02817|AMELX_BOVIN Amelogenin, X isoform OS=Bos taurus OX=9913 GN=AMELX PE=1 SV=2	1	hf1_10472_ebo_22_1_261219.ScanId;v=1;d1=28151.28151.3	controllerType=0 controllerNumber=1 scan=28151	57.7284
38323:4	1	S.MPLPPHPGHPGYINFS[+79.966]YEVLTPLKWYQSM.I		S[+80]	870.67	4	3479.66	3479.64	0	7.1	17	Non	305.02	305.02	32.82	5.67	1032	>sp|P02817|AMELX_BOVIN Amelogenin, X isoform OS=Bos taurus OX=9913 GN=AMELX PE=1 SV=2	1	hf1_10472_ebo_22_1_261219.ScanId;v=1;d1=28034.28034.4	controllerType=0 controllerNumber=1 scan=28034	57.5163
38029:4	1	S.MPLPPHPGHPGYINFS[+79.966]YEVLTPLKWYQSM.I		S[+80]	870.67	4	3479.66	3479.64	0	7	17	Non	430.69	430.69	46.23	7.19	1032	>sp|P02817|AMELX_BOVIN Amelogenin, X isoform OS=Bos taurus OX=9913 GN=AMELX PE=1 SV=2	1	hf1_10472_ebo_22_1_261219.ScanId;v=1;d1=27839.27839.4	controllerType=0 controllerNumber=1 scan=27839	57.1683
38208:3	1	S.MPLPPHPGHPGYINFS[+79.966]YEVLTPLKWYQSM.I		S[+80]	1160.56	3	3479.66	3479.64	0	7.9	17	Non	886.87	886.87	297.2	14.79	1032	>sp|P02817|AMELX_BOVIN Amelogenin, X isoform OS=Bos taurus OX=9913 GN=AMELX PE=1 SV=2	1	hf1_10472_ebo_22_1_261219.ScanId;v=1;d1=27956.27956.3	controllerType=0 controllerNumber=1 scan=27956	57.3778
35161:3	1	S.MP[+15.995]LPPHPGHPGYINFSY[+31.990]EVLTPLKWYQSM.I		P[+16], Y[+32]	1149.88	3	3447.64	3447.65	0	-5.5	17	Non	79.82	79.82	4	1.57	1032	>sp|P02817|AMELX_BOVIN Amelogenin, X isoform OS=Bos taurus OX=9913 GN=AMELX PE=1 SV=2	1	hf1_10472_ebo_22_1_261219.ScanId;v=1;d1=25953.25953.4	controllerType=0 controllerNumber=1 scan=25953	53.8069
36588:4	1	S.MPLPPHPGHPGYINFS[+79.966]YEVLTPLKWYQSM[+15.995].I		M[+16], S[+80]	874.661	4	3495.62	3495.63	0	-2.4	17	Non	161.26	161.26	11.9	2.59	1032	>sp|P02817|AMELX_BOVIN Amelogenin, X isoform OS=Bos taurus OX=9913 GN=AMELX PE=1 SV=2	1	hf1_10472_ebo_22_1_261219.ScanId;v=1;d1=26891.26891.4	controllerType=0 controllerNumber=1 scan=26891	55.4783
37518:3	1	S.M[+15.995]PLPPHPGHPGYINFS[+79.966]YEVLTPLKWYQSM.I		M[+16], S[+80]	1165.89	3	3495.64	3495.63	0	3.3	17	Non	184.19	184.19	2.89	3.54	1032	>sp|P02817|AMELX_BOVIN Amelogenin, X isoform OS=Bos taurus OX=9913 GN=AMELX PE=1 SV=2	1	hf1_10472_ebo_22_1_261219.ScanId;v=1;d1=27496.27496.3	controllerType=0 controllerNumber=1 scan=27496	56.5584
34837:5	1	S.MPLPPHPGHPGYINFS[+79.966]YEVLTPLKWYQSM[+15.995].I		M[+16], S[+80]	699.936	5	3495.65	3495.63	0	6.2	17	Non	211.2	211.2	21.66	3.82	1032	>sp|P02817|AMELX_BOVIN Amelogenin, X isoform OS=Bos taurus OX=9913 GN=AMELX PE=1 SV=2	1	hf1_10472_ebo_22_1_261219.ScanId;v=1;d1=25731.25731.5	controllerType=0 controllerNumber=1 scan=25731	53.4132
37501:4	1	S.MP[+15.995]LPPHPGHPGYINFS[+79.966]YEVLTPLKWYQSM.I		P[+16], S[+80]	874.667	4	3495.64	3495.63	0	4.1	17	Non	280.97	280.97	5.8	4.95	1032	>sp|P02817|AMELX_BOVIN Amelogenin, X isoform OS=Bos taurus OX=9913 GN=AMELX PE=1 SV=2	1	hf1_10472_ebo_22_1_261219.ScanId;v=1;d1=27484.27484.4	controllerType=0 controllerNumber=1 scan=27484	56.5371
39105:3	1	S.MPLPPHPGHPGYIN[+0.984]FS[+79.966]YEVLTPLKWYQSM.I		N[+1], S[+80]	1160.88	3	3480.64	3480.62	0	5.1	17	Non	367.7	367.7	19.01	6.92	1032	>sp|P02817|AMELX_BOVIN Amelogenin, X isoform OS=Bos taurus OX=9913 GN=AMELX PE=1 SV=2	1	hf1_10472_ebo_22_1_261219.ScanId;v=1;d1=28547.28547.3	controllerType=0 controllerNumber=1 scan=28547	58.4349
37201:4	1	S.MP[+15.995]LPPHPGHPGYINFS[+79.966]YEVLTPLKWYQSM.I		P[+16], S[+80]	874.669	4	3495.66	3495.63	0	7.1	17	Non	410.89	410.89	5.8	6.82	1032	>sp|P02817|AMELX_BOVIN Amelogenin, X isoform OS=Bos taurus OX=9913 GN=AMELX PE=1 SV=2	1	hf1_10472_ebo_22_1_261219.ScanId;v=1;d1=27285.27285.4	controllerType=0 controllerNumber=1 scan=27285	56.184
35298:4	1	S.MPLPPHPGHPGYINFS[+79.966]YEVLTPLKWYQSM[+15.995].I		M[+16], S[+80]	874.668	4	3495.65	3495.63	0	5.9	17	Non	431.06	431.06	41.35	6.7	1032	>sp|P02817|AMELX_BOVIN Amelogenin, X isoform OS=Bos taurus OX=9913 GN=AMELX PE=1 SV=2	1	hf1_10472_ebo_22_1_261219.ScanId;v=1;d1=26047.26047.4	controllerType=0 controllerNumber=1 scan=26047	53.9771
34730:4	1	S.MPLPPHPGHPGYINFS[+79.966]YEVLTPLKWYQSM[+15.995].I		M[+16], S[+80]	874.67	4	3495.66	3495.63	0	7.5	17	Non	443.18	443.18	64.48	7.06	1032	>sp|P02817|AMELX_BOVIN Amelogenin, X isoform OS=Bos taurus OX=9913 GN=AMELX PE=1 SV=2	1	hf1_10472_ebo_22_1_261219.ScanId;v=1;d1=25659.25659.4	controllerType=0 controllerNumber=1 scan=25659	53.2849
35010:4	1	S.MPLPPHPGHPGYINFS[+79.966]YEVLTPLKWYQSM[+15.995].I		M[+16], S[+80]	874.668	4	3495.65	3495.63	0	5.2	17	Non	448.29	448.29	67.22	6.79	1032	>sp|P02817|AMELX_BOVIN Amelogenin, X isoform OS=Bos taurus OX=9913 GN=AMELX PE=1 SV=2	1	hf1_10472_ebo_22_1_261219.ScanId;v=1;d1=25850.25850.4	controllerType=0 controllerNumber=1 scan=25850	53.6264
36904:3	1	S.MP[+15.995]LPPHPGHPGYINFS[+79.966]YEVLTPLKWYQSM.I		P[+16], S[+80]	1165.89	3	3495.66	3495.63	0	8.3	17	Non	450.65	450.65	4	7.14	1032	>sp|P02817|AMELX_BOVIN Amelogenin, X isoform OS=Bos taurus OX=9913 GN=AMELX PE=1 SV=2	1	hf1_10472_ebo_22_1_261219.ScanId;v=1;d1=27098.27098.3	controllerType=0 controllerNumber=1 scan=27098	55.8478
34705:3	1	S.MPLPPHPGHPGYINFS[+79.966]YEVLTPLKWYQSM[+15.995].I		M[+16], S[+80]	1165.89	3	3495.65	3495.63	0	6.9	17	Non	452.84	452.84	45.2	7.94	1032	>sp|P02817|AMELX_BOVIN Amelogenin, X isoform OS=Bos taurus OX=9913 GN=AMELX PE=1 SV=2	1	hf1_10472_ebo_22_1_261219.ScanId;v=1;d1=25640.25640.3	controllerType=0 controllerNumber=1 scan=25640	53.2506
35579:3	1	S.MPLPPHPGHPGYINFS[+79.966]YEVLTPLKWYQSM[+15.995].I		M[+16], S[+80]	1165.89	3	3495.64	3495.63	0	3.2	17	Non	707.42	707.42	62.58	11.09	1032	>sp|P02817|AMELX_BOVIN Amelogenin, X isoform OS=Bos taurus OX=9913 GN=AMELX PE=1 SV=2	1	hf1_10472_ebo_22_1_261219.ScanId;v=1;d1=26232.26232.3	controllerType=0 controllerNumber=1 scan=26232	54.3052
37215:3	1	S.M[+15.995]PLPPHPGHPGYINFS[+79.966]YEVLTPLKWYQSM.I		M[+16], S[+80]	1165.89	3	3495.66	3495.63	0	8.2	17	Non	871.87	871.87	11.45	13.99	1032	>sp|P02817|AMELX_BOVIN Amelogenin, X isoform OS=Bos taurus OX=9913 GN=AMELX PE=1 SV=2	1	hf1_10472_ebo_22_1_261219.ScanId;v=1;d1=27296.27296.3	controllerType=0 controllerNumber=1 scan=27296	56.2037
35282:3	1	S.MPLPPHPGHPGYINFS[+79.966]YEVLTPLKWYQSM[+15.995].I		M[+16], S[+80]	1165.89	3	3495.65	3495.63	0	7	17	Non	927.17	927.17	83.66	15.79	1032	>sp|P02817|AMELX_BOVIN Amelogenin, X isoform OS=Bos taurus OX=9913 GN=AMELX PE=1 SV=2	1	hf1_10472_ebo_22_1_261219.ScanId;v=1;d1=26036.26036.3	controllerType=0 controllerNumber=1 scan=26036	53.9577
34993:3	1	S.MPLPPHPGHPGYINFS[+79.966]YEVLTPLKWYQSM[+15.995].I		M[+16], S[+80]	1165.89	3	3495.65	3495.63	0	6.7	17	Non	943.22	943.22	99.14	15.79	1032	>sp|P02817|AMELX_BOVIN Amelogenin, X isoform OS=Bos taurus OX=9913 GN=AMELX PE=1 SV=2	1	hf1_10472_ebo_22_1_261219.ScanId;v=1;d1=25839.25839.3	controllerType=0 controllerNumber=1 scan=25839	53.607
38393:4	1	S.MP[+15.995]LPPHPGHPGYINFS[+79.966]YEVLTPLKWYQ[+0.984]SM.I		P[+16], Q[+1], S[+80]	874.916	4	3496.64	3496.61	0	8.3	17	Non	63.28	63.28	5.8	1.8	1032	>sp|P02817|AMELX_BOVIN Amelogenin, X isoform OS=Bos taurus OX=9913 GN=AMELX PE=1 SV=2	1	hf1_10472_ebo_22_1_261219.ScanId;v=1;d1=28081.28081.4	controllerType=0 controllerNumber=1 scan=28081	57.6018
39181:3	1	S.M[+15.995]PLPPHPGHPGYINFS[+79.966]YEVLTPLKWYQ[+0.984]SM.I		M[+16], Q[+1], S[+80]	1166.22	3	3496.64	3496.61	0	7.8	17	Non	67.49	67.49	13.6	3.41	1032	>sp|P02817|AMELX_BOVIN Amelogenin, X isoform OS=Bos taurus OX=9913 GN=AMELX PE=1 SV=2	1	hf1_10472_ebo_22_1_261219.ScanId;v=1;d1=28598.28598.3	controllerType=0 controllerNumber=1 scan=28598	58.5241
32458:4	1	S.MP[+15.995]LPPHPGHPGYINFS[+79.966]YEVLTPLKWY[+31.990]QSM.I		P[+16], S[+80], Y[+32]	882.667	4	3527.65	3527.62	0	7.1	17	Non	93.74	93.74	0	2.35	1032	>sp|P02817|AMELX_BOVIN Amelogenin, X isoform OS=Bos taurus OX=9913 GN=AMELX PE=1 SV=2	1	hf1_10472_ebo_22_1_261219.ScanId;v=1;d1=24141.24141.4	controllerType=0 controllerNumber=1 scan=24141	50.5778
36288:4	1	S.MPLPPHPGHPGYINFS[+79.966]YEVLTPLKWYQ[+0.984]SM[+15.995].I		M[+16], Q[+1], S[+80]	874.915	4	3496.64	3496.61	0	6.7	17	Non	115.3	101.31	12.48	2.14	1032	>sp|P02817|AMELX_BOVIN Amelogenin, X isoform OS=Bos taurus OX=9913 GN=AMELX PE=1 SV=2	1	hf1_10472_ebo_22_1_261219.ScanId;v=1;d1=26691.26691.4	controllerType=0 controllerNumber=1 scan=26691	55.1218
32157:4	1	S.M[+15.995]PLPPHPGHPGYINFS[+79.966]YEVLTPLKWY[+31.990]QSM.I		M[+16], S[+80], Y[+32]	882.665	4	3527.64	3527.62	0	5.3	17	Non	118.32	118.32	0	2.25	1032	>sp|P02817|AMELX_BOVIN Amelogenin, X isoform OS=Bos taurus OX=9913 GN=AMELX PE=1 SV=2	1	hf1_10472_ebo_22_1_261219.ScanId;v=1;d1=23942.23942.4	controllerType=0 controllerNumber=1 scan=23942	50.2254
36046:3	1	S.MPLPPHPGHPGYIN[+0.984]FS[+79.966]YEVLTPLKWYQSM[+15.995].I		M[+16], N[+1], S[+80]	1166.22	3	3496.64	3496.61	0	8.1	17	Non	121.44	121.44	25.63	2.11	1032	>sp|P02817|AMELX_BOVIN Amelogenin, X isoform OS=Bos taurus OX=9913 GN=AMELX PE=1 SV=2	1	hf1_10472_ebo_22_1_261219.ScanId;v=1;d1=26533.26533.3	controllerType=0 controllerNumber=1 scan=26533	54.8425
38094:4	1	S.MP[+15.995]LPPHPGHPGYIN[+0.984]FS[+79.966]YEVLTPLKWYQSM.I		N[+1], P[+16], S[+80]	874.916	4	3496.64	3496.61	0	7.7	17	Non	126.15	126.15	12.78	2.21	1032	>sp|P02817|AMELX_BOVIN Amelogenin, X isoform OS=Bos taurus OX=9913 GN=AMELX PE=1 SV=2	1	hf1_10472_ebo_22_1_261219.ScanId;v=1;d1=27882.27882.4	controllerType=0 controllerNumber=1 scan=27882	57.2452
33966:5	1	S.M[+15.995]PLPPHPGHPGYINFS[+79.966]YEVLTPLKWYQSM[+15.995].I		M[+16]*2, S[+80]	703.135	5	3511.64	3511.63	0	5.2	17	Non	140	140	0	2.18	1032	>sp|P02817|AMELX_BOVIN Amelogenin, X isoform OS=Bos taurus OX=9913 GN=AMELX PE=1 SV=2	1	hf1_10472_ebo_22_1_261219.ScanId;v=1;d1=25145.25145.5	controllerType=0 controllerNumber=1 scan=25145	52.3621
34237:4	1	S.MPLPPHPGHPGYINFS[+79.966]Y[+31.990]EVLTPLKWYQSM[+15.995].I		M[+16], S[+80], Y[+32]	882.666	4	3527.64	3527.62	0	5.9	17	Non	182.12	182.12	45.7	3.01	1032	>sp|P02817|AMELX_BOVIN Amelogenin, X isoform OS=Bos taurus OX=9913 GN=AMELX PE=1 SV=2	1	hf1_10472_ebo_22_1_261219.ScanId;v=1;d1=25326.25326.4	controllerType=0 controllerNumber=1 scan=25326	52.6897
33366:4	1	S.MPLPPHP[+31.990]GHPGYINFS[+79.966]YEVLTPLKWYQSM[+15.995].I		M[+16], P[+32], S[+80]	882.667	4	3527.64	3527.62	0	6.9	17	Non	192.52	192.52	7.03	3.25	1032	>sp|P02817|AMELX_BOVIN Amelogenin, X isoform OS=Bos taurus OX=9913 GN=AMELX PE=1 SV=2	1	hf1_10472_ebo_22_1_261219.ScanId;v=1;d1=24744.24744.4	controllerType=0 controllerNumber=1 scan=24744	51.6472
36664:3	1	S.MP[+15.995]LPPHPGHP[+15.995]GYINFS[+79.966]YEVLTPLKWYQSM.I		P[+16]*2, S[+80]	1171.22	3	3511.66	3511.63	0	8.8	17	Non	209.18	209.18	4	3.75	1032	>sp|P02817|AMELX_BOVIN Amelogenin, X isoform OS=Bos taurus OX=9913 GN=AMELX PE=1 SV=2	1	hf1_10472_ebo_22_1_261219.ScanId;v=1;d1=26940.26940.3	controllerType=0 controllerNumber=1 scan=26940	55.5669
33684:5	1	S.M[+15.995]PLPPHPGHPGYINFS[+79.966]YEVLTPLKWYQSM[+15.995].I		M[+16]*2, S[+80]	703.135	5	3511.65	3511.63	0	5.8	17	Non	226.55	226.55	0	3.57	1032	>sp|P02817|AMELX_BOVIN Amelogenin, X isoform OS=Bos taurus OX=9913 GN=AMELX PE=1 SV=2	1	hf1_10472_ebo_22_1_261219.ScanId;v=1;d1=24953.24953.5	controllerType=0 controllerNumber=1 scan=24953	52.017
33951:4	1	S.MPLPPHPGHPGYINFS[+79.966]YEVLTP[+31.990]LKWYQSM[+15.995].I		M[+16], P[+32], S[+80]	882.667	4	3527.65	3527.62	0	7.3	17	Non	253.99	253.99	26	5.08	1032	>sp|P02817|AMELX_BOVIN Amelogenin, X isoform OS=Bos taurus OX=9913 GN=AMELX PE=1 SV=2	1	hf1_10472_ebo_22_1_261219.ScanId;v=1;d1=25136.25136.4	controllerType=0 controllerNumber=1 scan=25136	52.3458
36267:3	1	S.MPLPPHPGHPGYINFS[+79.966]YEVLTPLKWYQ[+0.984]SM[+15.995].I		M[+16], Q[+1], S[+80]	1166.22	3	3496.64	3496.61	0	6.8	17	Non	260.03	260.03	18.79	5.35	1032	>sp|P02817|AMELX_BOVIN Amelogenin, X isoform OS=Bos taurus OX=9913 GN=AMELX PE=1 SV=2	1	hf1_10472_ebo_22_1_261219.ScanId;v=1;d1=26678.26678.3	controllerType=0 controllerNumber=1 scan=26678	55.0993
35353:4	1	S.MP[+15.995]LPPHPGHPGYINFS[+79.966]YEVLTPLKWYQSM[+15.995].I		M[+16], P[+16], S[+80]	878.664	4	3511.63	3511.63	0	2.4	17	Non	275.73	275.73	1.8	4.63	1032	>sp|P02817|AMELX_BOVIN Amelogenin, X isoform OS=Bos taurus OX=9913 GN=AMELX PE=1 SV=2	1	hf1_10472_ebo_22_1_261219.ScanId;v=1;d1=26086.26086.4	controllerType=0 controllerNumber=1 scan=26086	54.0473
46120:4	1	S.M[+15.995]PLPPHPGHPGYINFS[+79.966]YEVLTPLKWYQSM[+15.995].I		M[+16]*2, S[+80]	878.669	4	3511.66	3511.63	0	8.5	17	Non	280.71	280.71	0	4.87	1032	>sp|P02817|AMELX_BOVIN Amelogenin, X isoform OS=Bos taurus OX=9913 GN=AMELX PE=1 SV=2	1	hf1_10472_ebo_22_1_261219.ScanId;v=1;d1=34403.34403.4	controllerType=0 controllerNumber=1 scan=34403	73.6152
35077:4	1	S.MP[+15.995]LPPHPGHPGYINFS[+79.966]YEVLTPLKWYQSM[+15.995].I		M[+16], P[+16], S[+80]	878.664	4	3511.64	3511.63	0	2.7	17	Non	289.76	289.76	1.8	4.95	1032	>sp|P02817|AMELX_BOVIN Amelogenin, X isoform OS=Bos taurus OX=9913 GN=AMELX PE=1 SV=2	1	hf1_10472_ebo_22_1_261219.ScanId;v=1;d1=25895.25895.4	controllerType=0 controllerNumber=1 scan=25895	53.7058
33661:4	1	S.MPLPPHPGHPGYINFS[+79.966]YEVLTP[+31.990]LKWYQSM[+15.995].I		M[+16], P[+32], S[+80]	882.665	4	3527.64	3527.62	0	5.5	17	Non	293.86	293.86	9.65	5.38	1032	>sp|P02817|AMELX_BOVIN Amelogenin, X isoform OS=Bos taurus OX=9913 GN=AMELX PE=1 SV=2	1	hf1_10472_ebo_22_1_261219.ScanId;v=1;d1=24939.24939.4	controllerType=0 controllerNumber=1 scan=24939	51.9931
33938:4	1	S.M[+15.995]PLPPHPGHPGYINFS[+79.966]YEVLTPLKWYQSM[+15.995].I		M[+16]*2, S[+80]	878.667	4	3511.65	3511.63	0	5.9	17	Non	362.23	362.23	0	6.55	1032	>sp|P02817|AMELX_BOVIN Amelogenin, X isoform OS=Bos taurus OX=9913 GN=AMELX PE=1 SV=2	1	hf1_10472_ebo_22_1_261219.ScanId;v=1;d1=25126.25126.4	controllerType=0 controllerNumber=1 scan=25126	52.3287
38391:3	1	S.MP[+15.995]LPPHPGHPGYINFS[+79.966]YEVLTPLKWYQ[+0.984]SM.I		P[+16], Q[+1], S[+80]	1166.22	3	3496.64	3496.61	0	7	17	Non	369.45	369.45	4	7.85	1032	>sp|P02817|AMELX_BOVIN Amelogenin, X isoform OS=Bos taurus OX=9913 GN=AMELX PE=1 SV=2	1	hf1_10472_ebo_22_1_261219.ScanId;v=1;d1=28080.28080.3	controllerType=0 controllerNumber=1 scan=28080	57.6003
35954:4	1	S.MPLPPHPGHPGYINFS[+79.966]YEVLTPLKWYQ[+0.984]SM[+15.995].I		M[+16], Q[+1], S[+80]	874.915	4	3496.64	3496.61	0	7	17	Non	371.3	371.3	36.1	6.8	1032	>sp|P02817|AMELX_BOVIN Amelogenin, X isoform OS=Bos taurus OX=9913 GN=AMELX PE=1 SV=2	1	hf1_10472_ebo_22_1_261219.ScanId;v=1;d1=26475.26475.4	controllerType=0 controllerNumber=1 scan=26475	54.7402
38089:3	1	S.MP[+15.995]LPPHPGHPGYIN[+0.984]FS[+79.966]YEVLTPLKWYQSM.I		N[+1], P[+16], S[+80]	1166.22	3	3496.64	3496.61	0	8.2	17	Non	390.42	390.42	4	6.39	1032	>sp|P02817|AMELX_BOVIN Amelogenin, X isoform OS=Bos taurus OX=9913 GN=AMELX PE=1 SV=2	1	hf1_10472_ebo_22_1_261219.ScanId;v=1;d1=27880.27880.3	controllerType=0 controllerNumber=1 scan=27880	57.2422
33654:4	1	S.M[+15.995]PLPPHPGHPGYINFS[+79.966]YEVLTPLKWYQSM[+15.995].I		M[+16]*2, S[+80]	878.667	4	3511.65	3511.63	0	5.9	17	Non	409.2	409.2	0	6.7	1032	>sp|P02817|AMELX_BOVIN Amelogenin, X isoform OS=Bos taurus OX=9913 GN=AMELX PE=1 SV=2	1	hf1_10472_ebo_22_1_261219.ScanId;v=1;d1=24934.24934.4	controllerType=0 controllerNumber=1 scan=24934	51.9828
34223:4	1	S.M[+15.995]PLPPHPGHPGYINFS[+79.966]YEVLTPLKWYQSM[+15.995].I		M[+16]*2, S[+80]	878.667	4	3511.65	3511.63	0	5.9	17	Non	421.26	421.26	0	6.55	1032	>sp|P02817|AMELX_BOVIN Amelogenin, X isoform OS=Bos taurus OX=9913 GN=AMELX PE=1 SV=2	1	hf1_10472_ebo_22_1_261219.ScanId;v=1;d1=25318.25318.4	controllerType=0 controllerNumber=1 scan=25318	52.6749
34127:3	1	S.M[+15.995]PLPPHPGHPGYINFS[+79.966]YEVLTPLKWYQSM[+15.995].I		M[+16]*2, S[+80]	1171.22	3	3511.65	3511.63	0	6.4	17	Non	899.14	899.14	0	14.79	1032	>sp|P02817|AMELX_BOVIN Amelogenin, X isoform OS=Bos taurus OX=9913 GN=AMELX PE=1 SV=2	1	hf1_10472_ebo_22_1_261219.ScanId;v=1;d1=25253.25253.3	controllerType=0 controllerNumber=1 scan=25253	52.5576
35886:3	1	S.MPLPPHPGHPGYIN[+0.984]FS[+79.966]YEVLTPLKWYQSM[+15.995].I		M[+16], N[+1], S[+80]	1166.22	3	3496.64	3496.61	0	8.3	17	Non	912.93	912.93	59.31	14.99	1032	>sp|P02817|AMELX_BOVIN Amelogenin, X isoform OS=Bos taurus OX=9913 GN=AMELX PE=1 SV=2	1	hf1_10472_ebo_22_1_261219.ScanId;v=1;d1=26431.26431.3	controllerType=0 controllerNumber=1 scan=26431	54.662
33838:3	1	S.M[+15.995]PLPPHPGHPGYINFS[+79.966]YEVLTPLKWYQSM[+15.995].I		M[+16]*2, S[+80]	1171.22	3	3511.65	3511.63	0	6.2	17	Non	971.03	971.03	1.5	16.79	1032	>sp|P02817|AMELX_BOVIN Amelogenin, X isoform OS=Bos taurus OX=9913 GN=AMELX PE=1 SV=2	1	hf1_10472_ebo_22_1_261219.ScanId;v=1;d1=25058.25058.3	controllerType=0 controllerNumber=1 scan=25058	52.2043
35125:5	1	S.MPLPPHPGHP[+15.995]GYINF[+31.990]SY[+31.990]EVLTPLKWYQSM[+15.995].I		F[+32], M[+16], P[+16], Y[+32]	699.936	5	3495.65	3495.64	0	3.5	17	Non	135.44	135.44	0	2.25	1032	>sp|P02817|AMELX_BOVIN Amelogenin, X isoform OS=Bos taurus OX=9913 GN=AMELX PE=1 SV=2	1	hf1_10472_ebo_22_1_261219.ScanId;v=1;d1=25928.25928.5	controllerType=0 controllerNumber=1 scan=25928	53.7634
39007:4	1	S.MPLPPHPGHPGYIN[+0.984]F[+31.990]SY[+31.990]EVLTPLKWYQSM[+15.995].I		F[+32], M[+16], N[+1], Y[+32]	870.917	4	3480.65	3480.63	0	5.3	17	Non	137.31	137.31	4.67	2.93	1032	>sp|P02817|AMELX_BOVIN Amelogenin, X isoform OS=Bos taurus OX=9913 GN=AMELX PE=1 SV=2	1	hf1_10472_ebo_22_1_261219.ScanId;v=1;d1=28480.28480.2	controllerType=0 controllerNumber=1 scan=28480	58.3156
36888:4	1	S.MP[+15.995]LPPHPGHP[+15.995]GYINF[+31.990]SY[+31.990]EVLTPLKWYQSM.I		F[+32], P[+16]*2, Y[+32]	874.67	4	3495.66	3495.64	0	5.8	17	Non	184.37	184.37	0	3.71	1032	>sp|P02817|AMELX_BOVIN Amelogenin, X isoform OS=Bos taurus OX=9913 GN=AMELX PE=1 SV=2	1	hf1_10472_ebo_22_1_261219.ScanId;v=1;d1=27087.27087.4	controllerType=0 controllerNumber=1 scan=27087	55.828
32419:4	1	S.MP[+15.995]LPPHPGHPGYINFS[+79.966]YEVLTPLKW[+31.990]YQSM[+15.995].I		M[+16], P[+16], S[+80], W[+32]	886.665	4	3543.64	3543.62	0	7	17	Non	250.64	250.64	0	5.08	1032	>sp|P02817|AMELX_BOVIN Amelogenin, X isoform OS=Bos taurus OX=9913 GN=AMELX PE=1 SV=2	1	hf1_10472_ebo_22_1_261219.ScanId;v=1;d1=24118.24118.4	controllerType=0 controllerNumber=1 scan=24118	50.5374
33307:4	1	S.MP[+15.995]LPPHPGHPGYINFS[+79.966]YEVLTPLKW[+31.990]YQSM[+15.995].I		M[+16], P[+16], S[+80], W[+32]	886.662	4	3543.63	3543.62	0	2.8	17	Non	284.02	284.02	0	4.95	1032	>sp|P02817|AMELX_BOVIN Amelogenin, X isoform OS=Bos taurus OX=9913 GN=AMELX PE=1 SV=2	1	hf1_10472_ebo_22_1_261219.ScanId;v=1;d1=24703.24703.4	controllerType=0 controllerNumber=1 scan=24703	51.5738
32721:4	1	S.M[+15.995]PLPPHPGHPGYINFS[+79.966]YEVLTPLKW[+31.990]YQSM[+15.995].I		M[+16]*2, S[+80], W[+32]	886.664	4	3543.63	3543.62	0	5.3	17	Non	405.82	405.82	0	6.55	1032	>sp|P02817|AMELX_BOVIN Amelogenin, X isoform OS=Bos taurus OX=9913 GN=AMELX PE=1 SV=2	1	hf1_10472_ebo_22_1_261219.ScanId;v=1;d1=24315.24315.4	controllerType=0 controllerNumber=1 scan=24315	50.8838
38897:4	1	S.MPLPPHPGHPGYINFS[+79.966]YEVLTPLKWYQSMIR.H		S[+80]	937.968	4	3748.85	3748.82	0	8.3	17	NRagged	468.35	468.35	112.94	8.16	1032	>sp|P02817|AMELX_BOVIN Amelogenin, X isoform OS=Bos taurus OX=9913 GN=AMELX PE=1 SV=2	1	hf1_10472_ebo_22_1_261219.ScanId;v=1;d1=28408.28408.4	controllerType=0 controllerNumber=1 scan=28408	58.1857
34968:3	1	S.MPLPPHPGHPGYINFS[+79.966]YEVLTPLKWYQSM[+15.995]IR.H		M[+16], S[+80]	1255.62	3	3764.84	3764.82	0	5.2	17	NRagged	83.92	83.92	14.6	2.92	1032	>sp|P02817|AMELX_BOVIN Amelogenin, X isoform OS=Bos taurus OX=9913 GN=AMELX PE=1 SV=2	1	hf1_10472_ebo_22_1_261219.ScanId;v=1;d1=25821.25821.3	controllerType=0 controllerNumber=1 scan=25821	53.5713
34655:5	1	S.MPLPPHPGHPGYINFS[+79.966]YEVLTPLKWYQSM[+15.995]IR.H		M[+16], S[+80]	753.774	5	3764.84	3764.82	0	6.8	17	NRagged	380.91	380.91	11.29	8.86	1032	>sp|P02817|AMELX_BOVIN Amelogenin, X isoform OS=Bos taurus OX=9913 GN=AMELX PE=1 SV=2	1	hf1_10472_ebo_22_1_261219.ScanId;v=1;d1=25602.25602.5	controllerType=0 controllerNumber=1 scan=25602	53.1797
34927:5	1	S.MPLPPHPGHPGYINFS[+79.966]YEVLTPLKWYQSM[+15.995]IR.H		M[+16], S[+80]	753.774	5	3764.84	3764.82	0	6.1	17	NRagged	465.42	465.42	33.46	8.96	1032	>sp|P02817|AMELX_BOVIN Amelogenin, X isoform OS=Bos taurus OX=9913 GN=AMELX PE=1 SV=2	1	hf1_10472_ebo_22_1_261219.ScanId;v=1;d1=25794.25794.5	controllerType=0 controllerNumber=1 scan=25794	53.5252
36275:4	1	S.MPLPPHPGHPGYINFS[+79.966]YEVLTPLKWYQSM[+15.995]IR.H		M[+16], S[+80]	941.963	4	3764.83	3764.82	0	3.5	17	NRagged	513	513	6.81	7.38	1032	>sp|P02817|AMELX_BOVIN Amelogenin, X isoform OS=Bos taurus OX=9913 GN=AMELX PE=1 SV=2	1	hf1_10472_ebo_22_1_261219.ScanId;v=1;d1=26683.26683.4	controllerType=0 controllerNumber=1 scan=26683	55.1097
35188:4	1	S.MPLPPHPGHPGYINFS[+79.966]YEVLTPLKWYQSM[+15.995]IR.H		M[+16], S[+80]	941.966	4	3764.84	3764.82	0	7.3	17	NRagged	713.67	713.67	58.06	12.81	1032	>sp|P02817|AMELX_BOVIN Amelogenin, X isoform OS=Bos taurus OX=9913 GN=AMELX PE=1 SV=2	1	hf1_10472_ebo_22_1_261219.ScanId;v=1;d1=25972.25972.4	controllerType=0 controllerNumber=1 scan=25972	53.8412
34626:4	1	S.MPLPPHPGHPGYINFS[+79.966]YEVLTPLKWYQSM[+15.995]IR.H		M[+16], S[+80]	941.966	4	3764.84	3764.82	0	7.2	17	NRagged	840.31	840.31	40.33	14.81	1032	>sp|P02817|AMELX_BOVIN Amelogenin, X isoform OS=Bos taurus OX=9913 GN=AMELX PE=1 SV=2	1	hf1_10472_ebo_22_1_261219.ScanId;v=1;d1=25584.25584.4	controllerType=0 controllerNumber=1 scan=25584	53.1469
34906:4	1	S.MPLPPHPGHPGYINFS[+79.966]YEVLTPLKWYQSM[+15.995]IR.H		M[+16], S[+80]	941.965	4	3764.84	3764.82	0	6.2	17	NRagged	1284.89	1284.89	61.16	23.81	1032	>sp|P02817|AMELX_BOVIN Amelogenin, X isoform OS=Bos taurus OX=9913 GN=AMELX PE=1 SV=2	1	hf1_10472_ebo_22_1_261219.ScanId;v=1;d1=25780.25780.4	controllerType=0 controllerNumber=1 scan=25780	53.5012
37855:4	1	S.M[+15.995]PLPPHPGHPGYINFS[+79.966]YEVLTPLKWYQSMIR.H		M[+16], S[+80]	941.966	4	3764.84	3764.82	0	6.7	17	NRagged	1341.88	1341.88	54.97	24.81	1032	>sp|P02817|AMELX_BOVIN Amelogenin, X isoform OS=Bos taurus OX=9913 GN=AMELX PE=1 SV=2	1	hf1_10472_ebo_22_1_261219.ScanId;v=1;d1=27725.27725.4	controllerType=0 controllerNumber=1 scan=27725	56.9662
35390:4	1	S.MPLPPHPGHPGYINFS[+79.966]YEVLTPLKWYQ[+0.984]SM[+31.990]IR.H		M[+32], Q[+1], S[+80]	946.211	4	3781.82	3781.79	0	6.7	17	NRagged	23.61	22.74	0	2.13	1032	>sp|P02817|AMELX_BOVIN Amelogenin, X isoform OS=Bos taurus OX=9913 GN=AMELX PE=1 SV=2	1	hf1_10472_ebo_22_1_261219.ScanId;v=1;d1=26109.26109.4	controllerType=0 controllerNumber=1 scan=26109	54.0877
34010:4	1	S.MPLPPHPGHPGYINFS[+79.966]YEVLTP[+31.990]LKWY[+15.995]QSMIR.H		P[+32], S[+80], Y[+16]	949.96	4	3796.82	3796.81	0	3.7	17	NRagged	55.25	55.25	0	2.19	1032	>sp|P02817|AMELX_BOVIN Amelogenin, X isoform OS=Bos taurus OX=9913 GN=AMELX PE=1 SV=2	1	hf1_10472_ebo_22_1_261219.ScanId;v=1;d1=25173.25173.4	controllerType=0 controllerNumber=1 scan=25173	52.4127
30798:4	1	S.M[+15.995]PLPPHPGHPGYINFS[+79.966]YEVLTPLKWYQSM[+31.990]IR.H		M[+16][+32], S[+80]	949.961	4	3796.82	3796.81	0	4	17	NRagged	124.33	124.33	0	2.81	1032	>sp|P02817|AMELX_BOVIN Amelogenin, X isoform OS=Bos taurus OX=9913 GN=AMELX PE=1 SV=2	1	hf1_10472_ebo_22_1_261219.ScanId;v=1;d1=23032.23032.4	controllerType=0 controllerNumber=1 scan=23032	48.62
38636:5	1	S.MPLPPHP[+31.990]GHP[+31.990]GY[+15.995]INFSYEVLTPLKWYQSMIR.H		P[+32]*2, Y[+16]	750.576	5	3748.85	3748.83	0	5.9	17	NRagged	275	275	0	6.24	1032	>sp|P02817|AMELX_BOVIN Amelogenin, X isoform OS=Bos taurus OX=9913 GN=AMELX PE=1 SV=2	1	hf1_10472_ebo_22_1_261219.ScanId;v=1;d1=28241.28241.5	controllerType=0 controllerNumber=1 scan=28241	57.8884
35295:4	1	S.M[+15.995]PLPPHPGHPGYINFS[+79.966]YEVLTPLKWY[+31.990]QSMIR.H		M[+16], S[+80], Y[+32]	949.962	4	3796.83	3796.81	0	6	17	NRagged	283.63	283.63	0	6.17	1032	>sp|P02817|AMELX_BOVIN Amelogenin, X isoform OS=Bos taurus OX=9913 GN=AMELX PE=1 SV=2	1	hf1_10472_ebo_22_1_261219.ScanId;v=1;d1=26044.26044.4	controllerType=0 controllerNumber=1 scan=26044	53.9698
33113:4	1	S.MPLPPHPGHPGYINFS[+79.966]YEVLTPLKW[+31.990]Y[+15.995]QSMIR.H		S[+80], W[+32], Y[+16]	949.963	4	3796.83	3796.81	0	6.7	17	NRagged	332.09	332.09	4	6.86	1032	>sp|P02817|AMELX_BOVIN Amelogenin, X isoform OS=Bos taurus OX=9913 GN=AMELX PE=1 SV=2	1	hf1_10472_ebo_22_1_261219.ScanId;v=1;d1=24574.24574.4	controllerType=0 controllerNumber=1 scan=24574	51.3427
33405:4	1	S.MPLPPHPGHP[+31.990]GYINFS[+79.966]YEVLTPLKWYQSM[+15.995]IR.H		M[+16], P[+32], S[+80]	949.963	4	3796.83	3796.81	0	6.7	17	NRagged	348.34	348.34	0	6.88	1032	>sp|P02817|AMELX_BOVIN Amelogenin, X isoform OS=Bos taurus OX=9913 GN=AMELX PE=1 SV=2	1	hf1_10472_ebo_22_1_261219.ScanId;v=1;d1=24767.24767.4	controllerType=0 controllerNumber=1 scan=24767	51.6875
32811:4	1	S.MPLPPHPGHPGYINFS[+79.966]YEVLTPLKW[+31.990]YQSM[+15.995]IR.H		M[+16], S[+80], W[+32]	949.96	4	3796.82	3796.81	0	3.4	17	NRagged	428.35	428.35	16.74	7.3	1032	>sp|P02817|AMELX_BOVIN Amelogenin, X isoform OS=Bos taurus OX=9913 GN=AMELX PE=1 SV=2	1	hf1_10472_ebo_22_1_261219.ScanId;v=1;d1=24374.24374.4	controllerType=0 controllerNumber=1 scan=24374	50.9864
34064:5	1	S.M[+15.995]PLPPHPGHPGYINFS[+79.966]YEVLTPLKWYQSM[+15.995]IR.H		M[+16]*2, S[+80]	756.972	5	3780.83	3780.81	0	5.6	17	NRagged	484.02	484.02	0	8.68	1032	>sp|P02817|AMELX_BOVIN Amelogenin, X isoform OS=Bos taurus OX=9913 GN=AMELX PE=1 SV=2	1	hf1_10472_ebo_22_1_261219.ScanId;v=1;d1=25211.25211.5	controllerType=0 controllerNumber=1 scan=25211	52.4833
33649:4	1	S.M[+15.995]PLPPHPGHPGYINFS[+79.966]YEVLTPLKWYQSM[+15.995]IR.H		M[+16]*2, S[+80]	945.961	4	3780.82	3780.81	0	2.7	17	NRagged	488.84	488.84	0	7.38	1032	>sp|P02817|AMELX_BOVIN Amelogenin, X isoform OS=Bos taurus OX=9913 GN=AMELX PE=1 SV=2	1	hf1_10472_ebo_22_1_261219.ScanId;v=1;d1=24930.24930.4	controllerType=0 controllerNumber=1 scan=24930	51.974
34521:4	1	S.MP[+15.995]LPPHPGHPGYINFS[+79.966]YEVLTPLKWYQSM[+15.995]IR.H		M[+16], P[+16], S[+80]	945.963	4	3780.83	3780.81	0	5	17	NRagged	515.66	515.66	1.8	8.04	1032	>sp|P02817|AMELX_BOVIN Amelogenin, X isoform OS=Bos taurus OX=9913 GN=AMELX PE=1 SV=2	1	hf1_10472_ebo_22_1_261219.ScanId;v=1;d1=25515.25515.4	controllerType=0 controllerNumber=1 scan=25515	53.0228
35660:4	1	S.MPLPPHPGHPGYIN[+0.984]FS[+79.966]YEVLTPLKWYQSM[+15.995]IR.H		M[+16], N[+1], S[+80]	942.213	4	3765.83	3765.8	0	7.9	17	NRagged	545.01	545.01	24.39	8.42	1032	>sp|P02817|AMELX_BOVIN Amelogenin, X isoform OS=Bos taurus OX=9913 GN=AMELX PE=1 SV=2	1	hf1_10472_ebo_22_1_261219.ScanId;v=1;d1=26285.26285.4	controllerType=0 controllerNumber=1 scan=26285	54.4002
33759:5	1	S.M[+15.995]PLPPHPGHPGYINFS[+79.966]YEVLTPLKWYQSM[+15.995]IR.H		M[+16]*2, S[+80]	756.972	5	3780.83	3780.81	0	5.6	17	NRagged	679.97	679.97	0	11.54	1032	>sp|P02817|AMELX_BOVIN Amelogenin, X isoform OS=Bos taurus OX=9913 GN=AMELX PE=1 SV=2	1	hf1_10472_ebo_22_1_261219.ScanId;v=1;d1=25001.25001.5	controllerType=0 controllerNumber=1 scan=25001	52.1005
36276:4	1	S.MPLPPHPGHPGYINFS[+79.966]YEVLTPLKWYQ[+0.984]SM[+15.995]IR.H		M[+16], Q[+1], S[+80]	942.211	4	3765.82	3765.8	0	6.3	17	NRagged	702.79	702.79	54.24	12.81	1032	>sp|P02817|AMELX_BOVIN Amelogenin, X isoform OS=Bos taurus OX=9913 GN=AMELX PE=1 SV=2	1	hf1_10472_ebo_22_1_261219.ScanId;v=1;d1=26683.26683.4	controllerType=0 controllerNumber=1 scan=26683	55.1097
35972:4	1	S.MPLPPHPGHPGYIN[+0.984]FS[+79.966]YEVLTPLKWYQSM[+15.995]IR.H		M[+16], N[+1], S[+80]	942.212	4	3765.83	3765.8	0	7	17	NRagged	772.33	772.33	42.3	13.81	1032	>sp|P02817|AMELX_BOVIN Amelogenin, X isoform OS=Bos taurus OX=9913 GN=AMELX PE=1 SV=2	1	hf1_10472_ebo_22_1_261219.ScanId;v=1;d1=26487.26487.4	controllerType=0 controllerNumber=1 scan=26487	54.7612
33774:3	1	S.M[+15.995]PLPPHPGHPGYINFS[+79.966]YEVLTPLKWYQSM[+15.995]IR.H		M[+16]*2, S[+80]	1260.95	3	3780.83	3780.81	0	5.4	17	NRagged	815	815	0	13.64	1032	>sp|P02817|AMELX_BOVIN Amelogenin, X isoform OS=Bos taurus OX=9913 GN=AMELX PE=1 SV=2	1	hf1_10472_ebo_22_1_261219.ScanId;v=1;d1=25012.25012.3	controllerType=0 controllerNumber=1 scan=25012	52.1195
34227:4	1	S.MP[+15.995]LPPHPGHPGYINFS[+79.966]YEVLTPLKWYQSM[+15.995]IR.H		M[+16], P[+16], S[+80]	945.963	4	3780.83	3780.81	0	4.9	17	NRagged	1029.89	1029.89	1.8	18.55	1032	>sp|P02817|AMELX_BOVIN Amelogenin, X isoform OS=Bos taurus OX=9913 GN=AMELX PE=1 SV=2	1	hf1_10472_ebo_22_1_261219.ScanId;v=1;d1=25320.25320.4	controllerType=0 controllerNumber=1 scan=25320	52.6779
33939:4	1	S.M[+15.995]PLPPHPGHPGYINFS[+79.966]YEVLTPLKWYQSM[+15.995]IR.H		M[+16]*2, S[+80]	945.964	4	3780.83	3780.81	0	5.9	17	NRagged	1122.19	1122.19	21.74	20.55	1032	>sp|P02817|AMELX_BOVIN Amelogenin, X isoform OS=Bos taurus OX=9913 GN=AMELX PE=1 SV=2	1	hf1_10472_ebo_22_1_261219.ScanId;v=1;d1=25127.25127.4	controllerType=0 controllerNumber=1 scan=25127	52.3294
31920:4	1	S.MPLPPHPGHPGYINF[+15.995]S[+79.966]YEVLTP[+31.990]LKWY[+15.995]QSMIR.H		F[+16], P[+32], S[+80], Y[+16]	953.961	4	3812.82	3812.8	0	5.8	17	NRagged	56.43	56.43	3.94	2.32	1032	>sp|P02817|AMELX_BOVIN Amelogenin, X isoform OS=Bos taurus OX=9913 GN=AMELX PE=1 SV=2	1	hf1_10472_ebo_22_1_261219.ScanId;v=1;d1=23789.23789.3	controllerType=0 controllerNumber=1 scan=23789	49.9554
34885:4	1	S.M[+15.995]PLPPHPGHPGYIN[+0.984]FS[+79.966]YEVLTPLKWY[+31.990]QSMIR.H		M[+16], N[+1], S[+80], Y[+32]	950.21	4	3797.82	3797.79	0	7.4	17	NRagged	84.27	84.27	0	2.45	1032	>sp|P02817|AMELX_BOVIN Amelogenin, X isoform OS=Bos taurus OX=9913 GN=AMELX PE=1 SV=2	1	hf1_10472_ebo_22_1_261219.ScanId;v=1;d1=25764.25764.4	controllerType=0 controllerNumber=1 scan=25764	53.4713
37732:5	1	S.MP[+15.995]LPPHPGH[+15.995]PGY[+31.990]INF[+31.990]SYEVLTPLKWYQSMIR.H		F[+32], H[+16], P[+16], Y[+32]	753.774	5	3764.84	3764.82	0	5.1	17	NRagged	339.8	339.8	0	7.63	1032	>sp|P02817|AMELX_BOVIN Amelogenin, X isoform OS=Bos taurus OX=9913 GN=AMELX PE=1 SV=2	1	hf1_10472_ebo_22_1_261219.ScanId;v=1;d1=27643.27643.5	controllerType=0 controllerNumber=1 scan=27643	56.8186
31827:5	1	S.MP[+15.995]LPPHPGHPGYINFS[+79.966]YEVLTPLKW[+31.990]YQSM[+15.995]IR.H		M[+16], P[+16], S[+80], W[+32]	763.371	5	3812.83	3812.8	0	7.1	17	NRagged	414.56	414.56	1.8	8.21	1032	>sp|P02817|AMELX_BOVIN Amelogenin, X isoform OS=Bos taurus OX=9913 GN=AMELX PE=1 SV=2	1	hf1_10472_ebo_22_1_261219.ScanId;v=1;d1=23726.23726.5	controllerType=0 controllerNumber=1 scan=23726	49.8433
33029:4	1	S.M[+15.995]PLPPHPGHPGYINFS[+79.966]YEVLTP[+31.990]LKWYQSM[+15.995]IR.H		M[+16]*2, P[+32], S[+80]	953.958	4	3812.81	3812.8	0	2.7	17	NRagged	488.1	488.1	0	7.61	1032	>sp|P02817|AMELX_BOVIN Amelogenin, X isoform OS=Bos taurus OX=9913 GN=AMELX PE=1 SV=2	1	hf1_10472_ebo_22_1_261219.ScanId;v=1;d1=24519.24519.4	controllerType=0 controllerNumber=1 scan=24519	51.2454
32117:4	1	S.M[+15.995]PLPPHPGHPGYINFS[+79.966]YEVLTPLKW[+31.990]YQSM[+15.995]IR.H		M[+16]*2, S[+80], W[+32]	953.962	4	3812.83	3812.8	0	6.8	17	NRagged	872.98	872.98	7.28	15.81	1032	>sp|P02817|AMELX_BOVIN Amelogenin, X isoform OS=Bos taurus OX=9913 GN=AMELX PE=1 SV=2	1	hf1_10472_ebo_22_1_261219.ScanId;v=1;d1=23917.23917.4	controllerType=0 controllerNumber=1 scan=23917	50.1827
31823:4	1	S.M[+15.995]PLPPHPGHPGYINFS[+79.966]YEVLTPLKW[+31.990]YQSM[+15.995]IR.H		M[+16]*2, S[+80], W[+32]	953.963	4	3812.83	3812.8	0	7.6	17	NRagged	929.68	929.68	14.13	16.81	1032	>sp|P02817|AMELX_BOVIN Amelogenin, X isoform OS=Bos taurus OX=9913 GN=AMELX PE=1 SV=2	1	hf1_10472_ebo_22_1_261219.ScanId;v=1;d1=23723.23723.4	controllerType=0 controllerNumber=1 scan=23723	49.8388
32072:5	1	S.MP[+15.995]LPPHPGHPGYINFS[+79.966]YEVLTPLKWYQSM[+15.995]IRH.P		M[+16], P[+16], S[+80]	784.383	5	3917.89	3917.87	0	4	17	Non	370.81	370.81	1.8	6.34	1032	>sp|P02817|AMELX_BOVIN Amelogenin, X isoform OS=Bos taurus OX=9913 GN=AMELX PE=1 SV=2	1	hf1_10472_ebo_22_1_261219.ScanId;v=1;d1=23889.23889.5	controllerType=0 controllerNumber=1 scan=23889	50.132
32995:5	1	S.MPLP[+15.995]P[+31.990]HPGHP[+31.990]GYINFSYEVLTPLKWYQSM[+15.995]IRH.P		M[+16], P[+16][+32]*2	781.186	5	3901.9	3901.88	0	4.4	17	Non	86.96	86.96	0	2.21	1032	>sp|P02817|AMELX_BOVIN Amelogenin, X isoform OS=Bos taurus OX=9913 GN=AMELX PE=1 SV=2	1	hf1_10472_ebo_22_1_261219.ScanId;v=1;d1=24498.24498.5	controllerType=0 controllerNumber=1 scan=24498	51.2087
36057:5	1	S.MP[+15.995]LPPHP[+31.990]GHPGYINF[+31.990]SY[+15.995]EVLTPLKWYQSMIRH.P		F[+32], P[+16][+32], Y[+16]	781.187	5	3901.9	3901.88	0	5.5	17	Non	175.21	175.21	0	3.81	1032	>sp|P02817|AMELX_BOVIN Amelogenin, X isoform OS=Bos taurus OX=9913 GN=AMELX PE=1 SV=2	1	hf1_10472_ebo_22_1_261219.ScanId;v=1;d1=26538.26538.5	controllerType=0 controllerNumber=1 scan=26538	54.85
33261:6	1	S.MPLPPHPGHPGYINFSYEVLTPLKWYQSMIRHPYP.S			694.522	6	4162.09	4163.08	-1	3.8	17	Non	71.68	62.69	62.69	1.67	1032	>sp|P02817|AMELX_BOVIN Amelogenin, X isoform OS=Bos taurus OX=9913 GN=AMELX PE=1 SV=2	1	hf1_10472_ebo_22_1_261219.ScanId;v=1;d1=24675.24675.6	controllerType=0 controllerNumber=1 scan=24675	51.5231
33578:6	1	S.MPLPPHPGHPGYINFSYEVLTPLKWYQSMIRHPYP.S			694.521	6	4162.09	4163.08	-1	2.6	17	Non	87.23	87.23	87.23	1.67	1032	>sp|P02817|AMELX_BOVIN Amelogenin, X isoform OS=Bos taurus OX=9913 GN=AMELX PE=1 SV=2	1	hf1_10472_ebo_22_1_261219.ScanId;v=1;d1=24878.24878.6	controllerType=0 controllerNumber=1 scan=24878	51.8824
37700:6	1	S.MPLPPHPGHPGYINFS[+79.966]YEVLTPLKWYQSMIRHPYP.S		S[+80]	708.018	6	4243.07	4243.05	0	5.9	17	Non	70.04	70.04	19.21	2.52	1032	>sp|P02817|AMELX_BOVIN Amelogenin, X isoform OS=Bos taurus OX=9913 GN=AMELX PE=1 SV=2	1	hf1_10472_ebo_22_1_261219.ScanId;v=1;d1=27621.27621.6	controllerType=0 controllerNumber=1 scan=27621	56.7794
33658:6	1	S.MPLPPHPGHPGYINFSYEVLTPLKWYQSMIRH[+15.995]PYP.S		H[+16]	697.184	6	4178.07	4179.08	-1	-1	17	Non	160.36	149.11	0	2.23	1032	>sp|P02817|AMELX_BOVIN Amelogenin, X isoform OS=Bos taurus OX=9913 GN=AMELX PE=1 SV=2	1	hf1_10472_ebo_22_1_261219.ScanId;v=1;d1=24936.24936.6	controllerType=0 controllerNumber=1 scan=24936	51.9858
32504:4	1	S.MPLPPHPGHPGYINFSYEVLTPLKWYQSM[+15.995]IRHPYP.S		M[+16]	1045.28	4	4178.09	4179.08	-1	4.6	17	Non	178.52	178.52	28.22	2.76	1032	>sp|P02817|AMELX_BOVIN Amelogenin, X isoform OS=Bos taurus OX=9913 GN=AMELX PE=1 SV=2	1	hf1_10472_ebo_22_1_261219.ScanId;v=1;d1=24170.24170.4	controllerType=0 controllerNumber=1 scan=24170	50.6271
33771:5	1	S.MP[+15.995]LPPHPGHPGYINFSYEVLTPLKWYQSMIRHPYP.S		P[+16]	836.422	5	4178.08	4179.08	-1	1.3	17	Non	230.86	208.7	1.12	3.22	1032	>sp|P02817|AMELX_BOVIN Amelogenin, X isoform OS=Bos taurus OX=9913 GN=AMELX PE=1 SV=2	1	hf1_10472_ebo_22_1_261219.ScanId;v=1;d1=25010.25010.5	controllerType=0 controllerNumber=1 scan=25010	52.1165
32287:6	1	S.MPLPPHPGHPGYINFSYEVLTP[+15.995]LKWYQSMIRHPYP.S		P[+16]	697.355	6	4179.1	4179.08	0	4.6	17	Non	243.94	243.94	0	4.9	1032	>sp|P02817|AMELX_BOVIN Amelogenin, X isoform OS=Bos taurus OX=9913 GN=AMELX PE=1 SV=2	1	hf1_10472_ebo_22_1_261219.ScanId;v=1;d1=24032.24032.6	controllerType=0 controllerNumber=1 scan=24032	50.3836
38842:5	1	S.MPLPPHPGHPGYINFS[+79.966]YEVLTPLKWYQSMIRHPYP.S		S[+80]	849.419	5	4243.06	4243.05	0	3.8	17	Non	245.91	245.91	7.39	4.5	1032	>sp|P02817|AMELX_BOVIN Amelogenin, X isoform OS=Bos taurus OX=9913 GN=AMELX PE=1 SV=2	1	hf1_10472_ebo_22_1_261219.ScanId;v=1;d1=28374.28374.5	controllerType=0 controllerNumber=1 scan=28374	58.1252
37645:4	1	S.MPLPPHPGHPGYINFS[+79.966]YEVLTPLKWYQSMIRHPYP.S		S[+80]	1061.52	4	4243.07	4243.05	0	5.2	17	Non	308.54	308.54	80.72	4.5	1032	>sp|P02817|AMELX_BOVIN Amelogenin, X isoform OS=Bos taurus OX=9913 GN=AMELX PE=1 SV=2	1	hf1_10472_ebo_22_1_261219.ScanId;v=1;d1=27585.27585.4	controllerType=0 controllerNumber=1 scan=27585	56.7163
32367:6	1	S.MPLPPHPGHPGYINFSYEVLTPLKWYQSM[+15.995]IRHPYP.S		M[+16]	697.356	6	4179.1	4179.08	0	5.5	17	Non	314.93	314.93	7.81	5.4	1032	>sp|P02817|AMELX_BOVIN Amelogenin, X isoform OS=Bos taurus OX=9913 GN=AMELX PE=1 SV=2	1	hf1_10472_ebo_22_1_261219.ScanId;v=1;d1=24084.24084.6	controllerType=0 controllerNumber=1 scan=24084	50.4757
37940:4	1	S.MPLPPHPGHPGYINFS[+79.966]YEVLTPLKWYQSMIRHPYP.S		S[+80]	1061.53	4	4243.08	4243.05	0	7.1	17	Non	485.61	485.61	171.56	6.23	1032	>sp|P02817|AMELX_BOVIN Amelogenin, X isoform OS=Bos taurus OX=9913 GN=AMELX PE=1 SV=2	1	hf1_10472_ebo_22_1_261219.ScanId;v=1;d1=27782.27782.4	controllerType=0 controllerNumber=1 scan=27782	57.0672
37697:5	1	S.MPLPPHPGHPGYINFS[+79.966]YEVLTPLKWYQSMIRHPYP.S		S[+80]	849.421	5	4243.08	4243.05	0	6.7	17	Non	791.44	791.44	144.58	12.64	1032	>sp|P02817|AMELX_BOVIN Amelogenin, X isoform OS=Bos taurus OX=9913 GN=AMELX PE=1 SV=2	1	hf1_10472_ebo_22_1_261219.ScanId;v=1;d1=27619.27619.5	controllerType=0 controllerNumber=1 scan=27619	56.7764
36946:6	1	S.MP[+15.995]LPPHPGHPGYINFS[+79.966]YEVLTPLKWYQSMIRHPYP.S		P[+16], S[+80]	710.853	6	4260.08	4259.04	1	8.8	17	Non	55.33	55.33	5.8	2.27	1032	>sp|P02817|AMELX_BOVIN Amelogenin, X isoform OS=Bos taurus OX=9913 GN=AMELX PE=1 SV=2	1	hf1_10472_ebo_22_1_261219.ScanId;v=1;d1=27124.27124.6	controllerType=0 controllerNumber=1 scan=27124	55.8931
37705:4	1	S.M[+15.995]PLPPHPGHPGYINFS[+79.966]YEVLTPLKWYQSMIRHPYP.S		M[+16], S[+80]	1065.77	4	4260.06	4259.04	1	2.4	17	Non	97.93	97.93	16.18	2.13	1032	>sp|P02817|AMELX_BOVIN Amelogenin, X isoform OS=Bos taurus OX=9913 GN=AMELX PE=1 SV=2	1	hf1_10472_ebo_22_1_261219.ScanId;v=1;d1=27624.27624.4	controllerType=0 controllerNumber=1 scan=27624	56.784
31686:6	1	S.MP[+15.995]LPPHPGHPGYINFSYEVLTPLKWYQSMIR[+0.984]HPYP.S		P[+16], R[+1]	697.521	6	4180.09	4180.06	0	6.4	17	Non	109.23	109.23	5.8	2.29	1032	>sp|P02817|AMELX_BOVIN Amelogenin, X isoform OS=Bos taurus OX=9913 GN=AMELX PE=1 SV=2	1	hf1_10472_ebo_22_1_261219.ScanId;v=1;d1=23632.23632.6	controllerType=0 controllerNumber=1 scan=23632	49.6789
33546:4	1	S.MPLPPHPGHPGYINFS[+79.966]YEVLTPLKWYQSM[+15.995]IRHPYP.S		M[+16], S[+80]	1065.77	4	4260.07	4259.04	1	6.4	17	Non	143.07	143.07	12.15	2.39	1032	>sp|P02817|AMELX_BOVIN Amelogenin, X isoform OS=Bos taurus OX=9913 GN=AMELX PE=1 SV=2	1	hf1_10472_ebo_22_1_261219.ScanId;v=1;d1=24856.24856.3	controllerType=0 controllerNumber=1 scan=24856	51.8436
34429:4	1	S.MPLPPHPGHPGYINFS[+79.966]YEVLTPLKWY[+15.995]QSMIRHPYP.S		S[+80], Y[+16]	1065.27	4	4258.07	4259.04	-1	6.8	17	Non	221.43	221.43	6.97	3.49	1032	>sp|P02817|AMELX_BOVIN Amelogenin, X isoform OS=Bos taurus OX=9913 GN=AMELX PE=1 SV=2	1	hf1_10472_ebo_22_1_261219.ScanId;v=1;d1=25450.25450.4	controllerType=0 controllerNumber=1 scan=25450	52.9079
36908:4	1	S.M[+15.995]PLPPHPGHPGYINFS[+79.966]YEVLTPLKWYQSMIRHPYP.S		M[+16], S[+80]	1065.53	4	4259.08	4259.04	0	8.2	17	Non	233.07	233.07	23.83	2.77	1032	>sp|P02817|AMELX_BOVIN Amelogenin, X isoform OS=Bos taurus OX=9913 GN=AMELX PE=1 SV=2	1	hf1_10472_ebo_22_1_261219.ScanId;v=1;d1=27100.27100.4	controllerType=0 controllerNumber=1 scan=27100	55.8508
38036:4	1	S.M[+15.995]PLPPHPGHPGYINFS[+79.966]YEVLTPLKWYQSMIRHPYP.S		M[+16], S[+80]	1065.77	4	4260.05	4259.04	1	1	17	Non	233.3	233.3	14.39	2.51	1032	>sp|P02817|AMELX_BOVIN Amelogenin, X isoform OS=Bos taurus OX=9913 GN=AMELX PE=1 SV=2	1	hf1_10472_ebo_22_1_261219.ScanId;v=1;d1=27843.27843.4	controllerType=0 controllerNumber=1 scan=27843	57.1744
33534:5	1	S.MPLPPHPGHPGYINFS[+79.966]YEVLTPLKWYQSM[+15.995]IRHPYP.S		M[+16], S[+80]	852.619	5	4259.07	4259.04	0	5.7	17	Non	238.06	238.06	8.37	4.11	1032	>sp|P02817|AMELX_BOVIN Amelogenin, X isoform OS=Bos taurus OX=9913 GN=AMELX PE=1 SV=2	1	hf1_10472_ebo_22_1_261219.ScanId;v=1;d1=24848.24848.5	controllerType=0 controllerNumber=1 scan=24848	51.8287
34442:5	1	S.MPLPPHPGHPGYINFS[+79.966]YEVLTPLKWYQSM[+15.995]IRHPYP.S		M[+16], S[+80]	852.618	5	4259.06	4259.04	0	4.1	17	Non	240.45	240.45	10.1	4.21	1032	>sp|P02817|AMELX_BOVIN Amelogenin, X isoform OS=Bos taurus OX=9913 GN=AMELX PE=1 SV=2	1	hf1_10472_ebo_22_1_261219.ScanId;v=1;d1=25458.25458.3	controllerType=0 controllerNumber=1 scan=25458	52.9228
36890:5	1	S.M[+15.995]PLPPHPGHPGYINFS[+79.966]YEVLTPLKWYQSMIRHPYP.S		M[+16], S[+80]	852.619	5	4259.06	4259.04	0	4.9	17	Non	247.54	247.54	3.09	4.91	1032	>sp|P02817|AMELX_BOVIN Amelogenin, X isoform OS=Bos taurus OX=9913 GN=AMELX PE=1 SV=2	1	hf1_10472_ebo_22_1_261219.ScanId;v=1;d1=27088.27088.5	controllerType=0 controllerNumber=1 scan=27088	55.8295
38351:5	1	S.M[+15.995]PLPPHPGHPGYINFS[+79.966]YEVLTPLKWYQSMIRHPYP.S		M[+16], S[+80]	852.615	5	4259.04	4259.04	0	0.2	17	Non	300.59	300.59	4.99	4.22	1032	>sp|P02817|AMELX_BOVIN Amelogenin, X isoform OS=Bos taurus OX=9913 GN=AMELX PE=1 SV=2	1	hf1_10472_ebo_22_1_261219.ScanId;v=1;d1=28053.28053.5	controllerType=0 controllerNumber=1 scan=28053	57.5509
46140:5	1	S.MPLPPHPGHPGYINFS[+79.966]YEVLTPLKW[+15.995]YQSMIRHPYP.S		S[+80], W[+16]	852.623	5	4259.08	4259.04	0	9.6	17	Non	304.96	304.96	0	4.72	1032	>sp|P02817|AMELX_BOVIN Amelogenin, X isoform OS=Bos taurus OX=9913 GN=AMELX PE=1 SV=2	1	hf1_10472_ebo_22_1_261219.ScanId;v=1;d1=34415.34415.5	controllerType=0 controllerNumber=1 scan=34415	73.6371
33595:6	1	S.MPLPPHPGHPGYINFS[+79.966]YEVLTPLKW[+15.995]YQSMIRHPYP.S		S[+80], W[+16]	710.685	6	4259.07	4259.04	0	6.6	17	Non	319.23	319.23	0	5.66	1032	>sp|P02817|AMELX_BOVIN Amelogenin, X isoform OS=Bos taurus OX=9913 GN=AMELX PE=1 SV=2	1	hf1_10472_ebo_22_1_261219.ScanId;v=1;d1=24891.24891.6	controllerType=0 controllerNumber=1 scan=24891	51.9048
34138:5	1	S.MPLPPHPGHPGYINFS[+79.966]YEVLTPLKWYQSM[+15.995]IRHPYP.S		M[+16], S[+80]	852.62	5	4259.07	4259.04	0	5.9	17	Non	333.27	333.27	11.04	5.42	1032	>sp|P02817|AMELX_BOVIN Amelogenin, X isoform OS=Bos taurus OX=9913 GN=AMELX PE=1 SV=2	1	hf1_10472_ebo_22_1_261219.ScanId;v=1;d1=25261.25261.3	controllerType=0 controllerNumber=1 scan=25261	52.572
38023:5	1	S.MP[+15.995]LPPHPGHPGYINFS[+79.966]YEVLTPLKWYQSMIRHPYP.S		P[+16], S[+80]	852.818	5	4260.06	4259.04	1	3.1	17	Non	354.93	354.93	5.8	5.15	1032	>sp|P02817|AMELX_BOVIN Amelogenin, X isoform OS=Bos taurus OX=9913 GN=AMELX PE=1 SV=2	1	hf1_10472_ebo_22_1_261219.ScanId;v=1;d1=27836.27836.5	controllerType=0 controllerNumber=1 scan=27836	57.1639
31509:6	1	S.MP[+15.995]LPPHPGHPGYINFSYEVLTPLKWYQSM[+15.995]IRHPYP.S		M[+16], P[+16]	700.023	6	4195.1	4195.07	0	6.8	17	Non	436.13	436.13	0	7.03	1032	>sp|P02817|AMELX_BOVIN Amelogenin, X isoform OS=Bos taurus OX=9913 GN=AMELX PE=1 SV=2	1	hf1_10472_ebo_22_1_261219.ScanId;v=1;d1=23517.23517.6	controllerType=0 controllerNumber=1 scan=23517	49.4739
33879:6	1	S.MPLPPHPGHPGYINFS[+79.966]YEVLTPLKWY[+15.995]QSMIRHPYP.S		S[+80], Y[+16]	710.684	6	4259.06	4259.04	0	5	17	Non	505.33	505.33	23.93	7.51	1032	>sp|P02817|AMELX_BOVIN Amelogenin, X isoform OS=Bos taurus OX=9913 GN=AMELX PE=1 SV=2	1	hf1_10472_ebo_22_1_261219.ScanId;v=1;d1=25085.25085.6	controllerType=0 controllerNumber=1 scan=25085	52.2528
34591:5	1	S.MPLPPHPGHPGYINFS[+79.966]YEVLTPLKWY[+15.995]QSMIRHPYP.S		S[+80], Y[+16]	852.818	5	4260.06	4259.04	1	2.9	17	Non	516.15	516.15	5.82	6.21	1032	>sp|P02817|AMELX_BOVIN Amelogenin, X isoform OS=Bos taurus OX=9913 GN=AMELX PE=1 SV=2	1	hf1_10472_ebo_22_1_261219.ScanId;v=1;d1=25561.25561.5	controllerType=0 controllerNumber=1 scan=25561	53.1065
31506:5	1	S.MP[+15.995]LPPHPGHPGYINFSYEVLTPLKWYQSM[+15.995]IRHPYP.S		M[+16], P[+16]	840.026	5	4196.1	4195.07	1	5.7	17	Non	603.05	603.05	11.75	9.37	1032	>sp|P02817|AMELX_BOVIN Amelogenin, X isoform OS=Bos taurus OX=9913 GN=AMELX PE=1 SV=2	1	hf1_10472_ebo_22_1_261219.ScanId;v=1;d1=23516.23516.5	controllerType=0 controllerNumber=1 scan=23516	49.4724
34879:5	1	S.MPLPPHPGHPGYINFS[+79.966]YEVLTPLKWYQSM[+15.995]IRHPYP.S		M[+16], S[+80]	852.616	5	4259.05	4259.04	0	2.1	17	Non	618.06	618.06	10.36	8.45	1032	>sp|P02817|AMELX_BOVIN Amelogenin, X isoform OS=Bos taurus OX=9913 GN=AMELX PE=1 SV=2	1	hf1_10472_ebo_22_1_261219.ScanId;v=1;d1=25760.25760.5	controllerType=0 controllerNumber=1 scan=25760	53.4653
34128:4	1	S.MPLPPHPGHPGYINFS[+79.966]YEVLTPLKWYQSM[+15.995]IRHPYP.S		M[+16], S[+80]	1065.52	4	4259.07	4259.04	0	5.6	17	Non	685.83	685.83	74.3	9.47	1032	>sp|P02817|AMELX_BOVIN Amelogenin, X isoform OS=Bos taurus OX=9913 GN=AMELX PE=1 SV=2	1	hf1_10472_ebo_22_1_261219.ScanId;v=1;d1=25254.25254.4	controllerType=0 controllerNumber=1 scan=25254	52.5591
33567:4	1	S.MPLPPHPGHPGYINFS[+79.966]YEVLTPLKWYQSM[+15.995]IRHPYP.S		M[+16], S[+80]	1065.52	4	4259.07	4259.04	0	5.3	17	Non	700.41	700.41	35.56	10.47	1032	>sp|P02817|AMELX_BOVIN Amelogenin, X isoform OS=Bos taurus OX=9913 GN=AMELX PE=1 SV=2	1	hf1_10472_ebo_22_1_261219.ScanId;v=1;d1=24871.24871.4	controllerType=0 controllerNumber=1 scan=24871	51.8691
37216:4	1	S.M[+15.995]PLPPHPGHPGYINFS[+79.966]YEVLTPLKWYQSMIRHPYP.S		M[+16], S[+80]	1065.52	4	4259.08	4259.04	0	7.7	17	Non	716.27	716.27	27.4	10.74	1032	>sp|P02817|AMELX_BOVIN Amelogenin, X isoform OS=Bos taurus OX=9913 GN=AMELX PE=1 SV=2	1	hf1_10472_ebo_22_1_261219.ScanId;v=1;d1=27297.27297.4	controllerType=0 controllerNumber=1 scan=27297	56.2052
37202:5	1	S.M[+15.995]PLPPHPGHPGYINFS[+79.966]YEVLTPLKWYQSMIRHPYP.S		M[+16], S[+80]	852.62	5	4259.07	4259.04	0	6.7	17	Non	740.44	740.44	2.1	11.64	1032	>sp|P02817|AMELX_BOVIN Amelogenin, X isoform OS=Bos taurus OX=9913 GN=AMELX PE=1 SV=2	1	hf1_10472_ebo_22_1_261219.ScanId;v=1;d1=27286.27286.5	controllerType=0 controllerNumber=1 scan=27286	56.1855
33818:5	1	S.MPLPPHPGHPGYINFS[+79.966]YEVLTPLKWY[+15.995]QSMIRHPYP.S		S[+80], Y[+16]	852.619	5	4259.07	4259.04	0	5.7	17	Non	755.15	755.15	4.51	12.37	1032	>sp|P02817|AMELX_BOVIN Amelogenin, X isoform OS=Bos taurus OX=9913 GN=AMELX PE=1 SV=2	1	hf1_10472_ebo_22_1_261219.ScanId;v=1;d1=25043.25043.5	controllerType=0 controllerNumber=1 scan=25043	52.1769
33845:4	1	S.MPLPPHPGHPGYINFS[+79.966]YEVLTPLKWYQSM[+15.995]IRHPYP.S		M[+16], S[+80]	1065.52	4	4259.07	4259.04	0	5.1	17	Non	1165.73	1165.73	69.78	19.47	1032	>sp|P02817|AMELX_BOVIN Amelogenin, X isoform OS=Bos taurus OX=9913 GN=AMELX PE=1 SV=2	1	hf1_10472_ebo_22_1_261219.ScanId;v=1;d1=25064.25064.4	controllerType=0 controllerNumber=1 scan=25064	52.2155
31750:4	1	S.MPLPPHPGHPGYINFS[+79.966]YEVLTP[+31.990]LKWYQSM[+15.995]IRHPYP.S		M[+16], P[+32], S[+80]	1073.77	4	4292.06	4291.03	1	6.1	17	Non	68.99	68.99	0	2.12	1032	>sp|P02817|AMELX_BOVIN Amelogenin, X isoform OS=Bos taurus OX=9913 GN=AMELX PE=1 SV=2	1	hf1_10472_ebo_22_1_261219.ScanId;v=1;d1=23677.23677.4	controllerType=0 controllerNumber=1 scan=23677	49.7584
37272:5	1	S.M[+15.995]PLPPHPGHPGYINFS[+79.966]YEVLTPLKW[+15.995]YQSMIRHPYP.S		M[+16], S[+80], W[+16]	855.616	5	4274.05	4275.04	-1	4	17	Non	69.05	69.05	0	2.14	1032	>sp|P02817|AMELX_BOVIN Amelogenin, X isoform OS=Bos taurus OX=9913 GN=AMELX PE=1 SV=2	1	hf1_10472_ebo_22_1_261219.ScanId;v=1;d1=27332.27332.5	controllerType=0 controllerNumber=1 scan=27332	56.2671
32712:4	1	S.MPLPPHPGHPGYINF[+31.990]S[+79.966]YEVLTPLKWYQSM[+15.995]IRHPYP.S		F[+32], M[+16], S[+80]	1073.52	4	4291.06	4291.03	0	5.6	17	Non	121.38	121.38	2.73	2.13	1032	>sp|P02817|AMELX_BOVIN Amelogenin, X isoform OS=Bos taurus OX=9913 GN=AMELX PE=1 SV=2	1	hf1_10472_ebo_22_1_261219.ScanId;v=1;d1=24307.24307.4	controllerType=0 controllerNumber=1 scan=24307	50.8693
31944:6	1	S.MPLPPHPGHPGYINFS[+79.966]YEVLTPLKWY[+15.995]QSM[+31.990]IRHPYP.S		M[+32], S[+80], Y[+16]	716.016	6	4291.06	4291.03	0	6.8	17	Non	125.56	125.56	0	3.04	1032	>sp|P02817|AMELX_BOVIN Amelogenin, X isoform OS=Bos taurus OX=9913 GN=AMELX PE=1 SV=2	1	hf1_10472_ebo_22_1_261219.ScanId;v=1;d1=23803.23803.6	controllerType=0 controllerNumber=1 scan=23803	49.9793
31077:4	1	S.M[+15.995]PLPPHPGHPGYINFS[+79.966]YEVLTP[+31.990]LKWYQSMIRHPYP.S		M[+16], P[+32], S[+80]	1073.52	4	4291.06	4291.03	0	5.5	17	Non	129.08	129.08	0	2.28	1032	>sp|P02817|AMELX_BOVIN Amelogenin, X isoform OS=Bos taurus OX=9913 GN=AMELX PE=1 SV=2	1	hf1_10472_ebo_22_1_261219.ScanId;v=1;d1=23227.23227.4	controllerType=0 controllerNumber=1 scan=23227	48.9613
29939:6	1	S.MP[+15.995]LPPHPGHPGYINFSYEVLTPLKWY[+31.990]QSM[+15.995]IRHPYP.S		M[+16], P[+16], Y[+32]	705.354	6	4227.09	4227.06	0	6	17	Non	131.28	131.28	0	2.34	1032	>sp|P02817|AMELX_BOVIN Amelogenin, X isoform OS=Bos taurus OX=9913 GN=AMELX PE=1 SV=2	1	hf1_10472_ebo_22_1_261219.ScanId;v=1;d1=22438.22438.4	controllerType=0 controllerNumber=1 scan=22438	47.5753
34136:6	1	S.MP[+15.995]LPPHPGHPGYINFS[+79.966]YEVLTPLKW[+15.995]YQSMIRHPYP.S		P[+16], S[+80], W[+16]	713.515	6	4276.06	4275.04	1	3.3	17	Non	137.18	137.18	0	2.5	1032	>sp|P02817|AMELX_BOVIN Amelogenin, X isoform OS=Bos taurus OX=9913 GN=AMELX PE=1 SV=2	1	hf1_10472_ebo_22_1_261219.ScanId;v=1;d1=25260.25260.6	controllerType=0 controllerNumber=1 scan=25260	52.571
29900:5	1	S.MP[+15.995]LPPHPGHPGYINFS[+79.966]YEVLTPLKWYQSM[+31.990]IRHPYP.S		M[+32], P[+16], S[+80]	859.216	5	4292.05	4291.03	1	3.3	17	Non	138.03	138.03	0	2.5	1032	>sp|P02817|AMELX_BOVIN Amelogenin, X isoform OS=Bos taurus OX=9913 GN=AMELX PE=1 SV=2	1	hf1_10472_ebo_22_1_261219.ScanId;v=1;d1=22408.22408.5	controllerType=0 controllerNumber=1 scan=22408	47.5222
35019:6	1	S.MPLPPHPGHPGYINFS[+79.966]YEVLTPLKWYQ[+0.984]SMIRH[+15.995]PYP.S		H[+16], Q[+1], S[+80]	711.016	6	4261.06	4260.03	1	6.3	17	Non	147.83	147.83	0	2.47	1032	>sp|P02817|AMELX_BOVIN Amelogenin, X isoform OS=Bos taurus OX=9913 GN=AMELX PE=1 SV=2	1	hf1_10472_ebo_22_1_261219.ScanId;v=1;d1=25856.25856.6	controllerType=0 controllerNumber=1 scan=25856	53.6356
33963:6	1	S.MP[+15.995]LPPHPGHPGYINFS[+79.966]YEVLTPLKWYQSM[+15.995]IRHPYP.S		M[+16], P[+16], S[+80]	713.514	6	4276.05	4275.04	1	1.2	17	Non	148.16	148.16	1.8	2.27	1032	>sp|P02817|AMELX_BOVIN Amelogenin, X isoform OS=Bos taurus OX=9913 GN=AMELX PE=1 SV=2	1	hf1_10472_ebo_22_1_261219.ScanId;v=1;d1=25143.25143.5	controllerType=0 controllerNumber=1 scan=25143	52.3591
36970:5	1	S.MP[+15.995]LPPHPGHPGYINFS[+79.966]YEVLTPLKWY[+15.995]QSMIRHPYP.S		P[+16], S[+80], Y[+16]	855.82	5	4275.07	4275.04	0	7.8	17	Non	149.12	149.12	0	3.04	1032	>sp|P02817|AMELX_BOVIN Amelogenin, X isoform OS=Bos taurus OX=9913 GN=AMELX PE=1 SV=2	1	hf1_10472_ebo_22_1_261219.ScanId;v=1;d1=27140.27140.5	controllerType=0 controllerNumber=1 scan=27140	55.9233
33269:6	1	S.MP[+15.995]LPPHPGHPGYINFS[+79.966]YEVLTPLKWYQSMIRH[+15.995]PYP.S		H[+16], P[+16], S[+80]	713.349	6	4275.06	4275.04	0	4.8	17	Non	161.78	161.78	0.4	3.56	1032	>sp|P02817|AMELX_BOVIN Amelogenin, X isoform OS=Bos taurus OX=9913 GN=AMELX PE=1 SV=2	1	hf1_10472_ebo_22_1_261219.ScanId;v=1;d1=24681.24681.6	controllerType=0 controllerNumber=1 scan=24681	51.535
35111:4	1	S.M[+15.995]PLPPHPGHPGYINFS[+79.966]YEVLTP[+15.995]LKWYQSMIRHPYP.S		M[+16], P[+16], S[+80]	1069.76	4	4276.02	4275.04	1	-4.9	17	Non	171.17	171.17	0	2.18	1032	>sp|P02817|AMELX_BOVIN Amelogenin, X isoform OS=Bos taurus OX=9913 GN=AMELX PE=1 SV=2	1	hf1_10472_ebo_22_1_261219.ScanId;v=1;d1=25919.25919.4	controllerType=0 controllerNumber=1 scan=25919	53.747
34629:4	1	S.M[+15.995]PLPPHPGHPGYINFS[+79.966]YEVLTP[+31.990]LKWYQSMIRHPYP.S		M[+16], P[+32], S[+80]	1073.52	4	4291.07	4291.03	0	7.7	17	Non	174.08	174.08	0	2.98	1032	>sp|P02817|AMELX_BOVIN Amelogenin, X isoform OS=Bos taurus OX=9913 GN=AMELX PE=1 SV=2	1	hf1_10472_ebo_22_1_261219.ScanId;v=1;d1=25586.25586.4	controllerType=0 controllerNumber=1 scan=25586	53.15
35961:5	1	S.MPLPPHPGHPGYINFS[+79.966]YEVLTPLK[+15.995]WYQ[+0.984]SMIRHPYP.S		K[+16], Q[+1], S[+80]	852.815	5	4260.05	4260.03	0	4.3	17	Non	178.4	178.4	0	3.57	1032	>sp|P02817|AMELX_BOVIN Amelogenin, X isoform OS=Bos taurus OX=9913 GN=AMELX PE=1 SV=2	1	hf1_10472_ebo_22_1_261219.ScanId;v=1;d1=26479.26479.5	controllerType=0 controllerNumber=1 scan=26479	54.7462
30231:5	1	S.MP[+15.995]LPPHPGHPGYINFS[+79.966]YEVLTPLKW[+31.990]YQSMIRHPYP.S		P[+16], S[+80], W[+32]	858.817	5	4290.06	4291.03	-1	5.9	17	Non	189.88	189.88	0	3.57	1032	>sp|P02817|AMELX_BOVIN Amelogenin, X isoform OS=Bos taurus OX=9913 GN=AMELX PE=1 SV=2	1	hf1_10472_ebo_22_1_261219.ScanId;v=1;d1=22638.22638.5	controllerType=0 controllerNumber=1 scan=22638	47.9249
31871:4	1	S.M[+15.995]PLPPHPGHPGYINFS[+79.966]YEVLTPLKWYQSM[+15.995]IRHPYP.S		M[+16]*2, S[+80]	1069.77	4	4276.07	4275.04	1	7.1	17	Non	191.41	191.41	13.37	2.98	1032	>sp|P02817|AMELX_BOVIN Amelogenin, X isoform OS=Bos taurus OX=9913 GN=AMELX PE=1 SV=2	1	hf1_10472_ebo_22_1_261219.ScanId;v=1;d1=23757.23757.4	controllerType=0 controllerNumber=1 scan=23757	49.8985
32046:4	1	S.MPLPPHPGHPGYINFS[+79.966]YEVLTP[+31.990]LKWY[+15.995]QSMIRHPYP.S		P[+32], S[+80], Y[+16]	1073.52	4	4291.06	4291.03	0	6.6	17	Non	204.86	204.86	3.24	3.49	1032	>sp|P02817|AMELX_BOVIN Amelogenin, X isoform OS=Bos taurus OX=9913 GN=AMELX PE=1 SV=2	1	hf1_10472_ebo_22_1_261219.ScanId;v=1;d1=23873.23873.4	controllerType=0 controllerNumber=1 scan=23873	50.105
33847:6	1	S.MP[+15.995]LPPHPGHPGYINFS[+79.966]YEVLTPLKW[+15.995]YQSMIRHPYP.S		P[+16], S[+80], W[+16]	713.514	6	4276.04	4275.04	1	0.7	17	Non	206.16	206.16	0.67	2.99	1032	>sp|P02817|AMELX_BOVIN Amelogenin, X isoform OS=Bos taurus OX=9913 GN=AMELX PE=1 SV=2	1	hf1_10472_ebo_22_1_261219.ScanId;v=1;d1=25065.25065.6	controllerType=0 controllerNumber=1 scan=25065	52.217
31327:5	1	S.MP[+15.995]LPPHPGHPGYINFS[+79.966]YEVLTPLKWYQSMIRH[+15.995]PYP.S		H[+16], P[+16], S[+80]	855.82	5	4275.07	4275.04	0	7.6	17	Non	225.38	225.38	3.8	4.38	1032	>sp|P02817|AMELX_BOVIN Amelogenin, X isoform OS=Bos taurus OX=9913 GN=AMELX PE=1 SV=2	1	hf1_10472_ebo_22_1_261219.ScanId;v=1;d1=23393.23393.5	controllerType=0 controllerNumber=1 scan=23393	49.2582
32407:4	1	S.M[+15.995]PLPPHPGHPGYINFS[+79.966]YEVLTPLKWYQSM[+31.990]IRHPYP.S		M[+16][+32], S[+80]	1073.27	4	4290.06	4291.03	-1	8.1	17	Non	240.27	240.27	9.27	3.47	1032	>sp|P02817|AMELX_BOVIN Amelogenin, X isoform OS=Bos taurus OX=9913 GN=AMELX PE=1 SV=2	1	hf1_10472_ebo_22_1_261219.ScanId;v=1;d1=24109.24109.4	controllerType=0 controllerNumber=1 scan=24109	50.5184
28677:5	1	S.MP[+15.995]LPPHPGHPGYINFS[+79.966]YEVLTPLKW[+31.990]YQSMIRHPYP.S		P[+16], S[+80], W[+32]	858.816	5	4290.05	4291.03	-1	5.2	17	Non	258.44	258.44	0.52	4.66	1032	>sp|P02817|AMELX_BOVIN Amelogenin, X isoform OS=Bos taurus OX=9913 GN=AMELX PE=1 SV=2	1	hf1_10472_ebo_22_1_261219.ScanId;v=1;d1=21575.21575.5	controllerType=0 controllerNumber=1 scan=21575	46.0663
32118:5	1	S.MPLPPHPGHPGYINFS[+79.966]YEVLTPLK[+15.995]W[+31.990]YQSMIRHPYP.S		K[+16], S[+80], W[+32]	859.017	5	4291.05	4291.03	0	5	17	Non	299.13	299.13	0	5.24	1032	>sp|P02817|AMELX_BOVIN Amelogenin, X isoform OS=Bos taurus OX=9913 GN=AMELX PE=1 SV=2	1	hf1_10472_ebo_22_1_261219.ScanId;v=1;d1=23918.23918.5	controllerType=0 controllerNumber=1 scan=23918	50.1842
31822:5	1	S.MPLPPHPGHPGYINFS[+79.966]YEVLTPLKW[+15.995]YQSM[+31.990]IRHPYP.S		M[+32], S[+80], W[+16]	859.017	5	4291.06	4291.03	0	5.1	17	Non	299.8	299.8	0	4.99	1032	>sp|P02817|AMELX_BOVIN Amelogenin, X isoform OS=Bos taurus OX=9913 GN=AMELX PE=1 SV=2	1	hf1_10472_ebo_22_1_261219.ScanId;v=1;d1=23722.23722.5	controllerType=0 controllerNumber=1 scan=23722	49.8373
36672:5	1	S.M[+15.995]PLPPHPGHPGYINF[+15.995]S[+79.966]YEVLTPLKWYQSMIRHPYP.S		F[+16], M[+16], S[+80]	855.82	5	4275.07	4275.04	0	7.3	17	Non	314.31	314.31	0.57	5.51	1032	>sp|P02817|AMELX_BOVIN Amelogenin, X isoform OS=Bos taurus OX=9913 GN=AMELX PE=1 SV=2	1	hf1_10472_ebo_22_1_261219.ScanId;v=1;d1=26946.26946.5	controllerType=0 controllerNumber=1 scan=26946	55.5759
28967:5	1	S.MP[+15.995]LPPHPGHPGYINFS[+79.966]YEVLTPLKW[+31.990]YQSMIRHPYP.S		P[+16], S[+80], W[+32]	859.018	5	4291.06	4291.03	0	6.2	17	Non	322.28	322.28	0	5.7	1032	>sp|P02817|AMELX_BOVIN Amelogenin, X isoform OS=Bos taurus OX=9913 GN=AMELX PE=1 SV=2	1	hf1_10472_ebo_22_1_261219.ScanId;v=1;d1=21778.21778.5	controllerType=0 controllerNumber=1 scan=21778	46.4212
30864:5	1	S.MP[+15.995]LPPHPGHPGYINFS[+79.966]YEVLTPLKWYQSM[+31.990]IRHPYP.S		M[+32], P[+16], S[+80]	859.017	5	4291.06	4291.03	0	5.4	17	Non	329.22	329.22	0	5.42	1032	>sp|P02817|AMELX_BOVIN Amelogenin, X isoform OS=Bos taurus OX=9913 GN=AMELX PE=1 SV=2	1	hf1_10472_ebo_22_1_261219.ScanId;v=1;d1=23076.23076.5	controllerType=0 controllerNumber=1 scan=23076	48.6975
33664:5	1	S.MP[+15.995]LPPHPGHPGYINFS[+79.966]YEVLTPLKWYQSM[+15.995]IRHPYP.S		M[+16], P[+16], S[+80]	855.816	5	4275.05	4275.04	0	3.2	17	Non	352.04	352.04	1.8	5	1032	>sp|P02817|AMELX_BOVIN Amelogenin, X isoform OS=Bos taurus OX=9913 GN=AMELX PE=1 SV=2	1	hf1_10472_ebo_22_1_261219.ScanId;v=1;d1=24941.24941.4	controllerType=0 controllerNumber=1 scan=24941	51.9961
32684:6	1	S.MP[+15.995]LPPHPGHPGYINFS[+79.966]YEVLTPLKWY[+15.995]QSMIRHPYP.S		P[+16], S[+80], Y[+16]	713.35	6	4275.06	4275.04	0	5.4	17	Non	377.8	377.8	5.8	6.76	1032	>sp|P02817|AMELX_BOVIN Amelogenin, X isoform OS=Bos taurus OX=9913 GN=AMELX PE=1 SV=2	1	hf1_10472_ebo_22_1_261219.ScanId;v=1;d1=24289.24289.6	controllerType=0 controllerNumber=1 scan=24289	50.8366
46149:5	1	S.MP[+15.995]LPPHPGHPGYINFS[+79.966]YEVLTPLKWY[+15.995]QSMIRHPYP.S		P[+16], S[+80], Y[+16]	856.022	5	4276.08	4275.04	1	9.1	17	Non	448.34	448.34	1.27	6.33	1032	>sp|P02817|AMELX_BOVIN Amelogenin, X isoform OS=Bos taurus OX=9913 GN=AMELX PE=1 SV=2	1	hf1_10472_ebo_22_1_261219.ScanId;v=1;d1=34420.34420.5	controllerType=0 controllerNumber=1 scan=34420	73.6483
33576:4	1	S.M[+15.995]PLPPHPGHPGYINFS[+79.966]YEVLTPLKWYQSM[+15.995]IRHPYP.S		M[+16]*2, S[+80]	1069.27	4	4274.06	4275.04	-1	6.3	17	Non	464.52	464.52	0	6.23	1032	>sp|P02817|AMELX_BOVIN Amelogenin, X isoform OS=Bos taurus OX=9913 GN=AMELX PE=1 SV=2	1	hf1_10472_ebo_22_1_261219.ScanId;v=1;d1=24877.24877.4	controllerType=0 controllerNumber=1 scan=24877	51.8809
34449:4	1	S.M[+15.995]PLPPHPGHPGYINFS[+79.966]YEVLTPLKWYQSM[+15.995]IRHPYP.S		M[+16]*2, S[+80]	1069.77	4	4276.05	4275.04	1	2.6	17	Non	475.42	475.42	0	5.16	1032	>sp|P02817|AMELX_BOVIN Amelogenin, X isoform OS=Bos taurus OX=9913 GN=AMELX PE=1 SV=2	1	hf1_10472_ebo_22_1_261219.ScanId;v=1;d1=25463.25463.4	controllerType=0 controllerNumber=1 scan=25463	52.9304
33559:5	1	S.MP[+15.995]LPPHPGHPGYINFS[+79.966]YEVLTPLKWYQSM[+15.995]IRHPYP.S		M[+16], P[+16], S[+80]	855.817	5	4275.06	4275.04	0	4.6	17	Non	494.31	494.31	2.09	6.86	1032	>sp|P02817|AMELX_BOVIN Amelogenin, X isoform OS=Bos taurus OX=9913 GN=AMELX PE=1 SV=2	1	hf1_10472_ebo_22_1_261219.ScanId;v=1;d1=24866.24866.5	controllerType=0 controllerNumber=1 scan=24866	51.8615
32976:6	1	S.M[+15.995]PLPPHPGHPGYINFS[+79.966]YEVLTPLKWYQSM[+15.995]IRHPYP.S		M[+16]*2, S[+80]	713.35	6	4275.06	4275.04	0	5.6	17	Non	523.89	523.89	0	6.97	1032	>sp|P02817|AMELX_BOVIN Amelogenin, X isoform OS=Bos taurus OX=9913 GN=AMELX PE=1 SV=2	1	hf1_10472_ebo_22_1_261219.ScanId;v=1;d1=24486.24486.6	controllerType=0 controllerNumber=1 scan=24486	51.1878
35173:5	1	S.MPLPPHPGHPGYINFS[+79.966]YEVLTPLKWY[+15.995]Q[+0.984]SMIRHPYP.S		Q[+1], S[+80], Y[+16]	852.817	5	4260.06	4260.03	0	6.9	17	Non	524.42	524.42	14.68	7.25	1032	>sp|P02817|AMELX_BOVIN Amelogenin, X isoform OS=Bos taurus OX=9913 GN=AMELX PE=1 SV=2	1	hf1_10472_ebo_22_1_261219.ScanId;v=1;d1=25961.25961.5	controllerType=0 controllerNumber=1 scan=25961	53.8218
34445:5	1	S.MP[+15.995]LPPHPGHPGYINFS[+79.966]YEVLTPLKWY[+15.995]QSMIRHPYP.S		P[+16], S[+80], Y[+16]	856.016	5	4276.05	4275.04	1	1.8	17	Non	549.21	549.21	4.58	6.06	1032	>sp|P02817|AMELX_BOVIN Amelogenin, X isoform OS=Bos taurus OX=9913 GN=AMELX PE=1 SV=2	1	hf1_10472_ebo_22_1_261219.ScanId;v=1;d1=25460.25460.5	controllerType=0 controllerNumber=1 scan=25460	52.9258
33839:5	1	S.M[+15.995]PLPPHPGHPGYINFS[+79.966]YEVLTPLKWYQSM[+15.995]IRHPYP.S		M[+16]*2, S[+80]	856.015	5	4276.05	4275.04	1	0.9	17	Non	704.58	704.58	0	10.45	1032	>sp|P02817|AMELX_BOVIN Amelogenin, X isoform OS=Bos taurus OX=9913 GN=AMELX PE=1 SV=2	1	hf1_10472_ebo_22_1_261219.ScanId;v=1;d1=25059.25059.5	controllerType=0 controllerNumber=1 scan=25059	52.2052
32665:5	1	S.M[+15.995]PLPPHPGHPGYINFS[+79.966]YEVLTPLKWYQSM[+15.995]IRHPYP.S		M[+16]*2, S[+80]	855.82	5	4275.07	4275.04	0	7.6	17	Non	751.6	751.6	0	12.64	1032	>sp|P02817|AMELX_BOVIN Amelogenin, X isoform OS=Bos taurus OX=9913 GN=AMELX PE=1 SV=2	1	hf1_10472_ebo_22_1_261219.ScanId;v=1;d1=24277.24277.5	controllerType=0 controllerNumber=1 scan=24277	50.8156
32817:3	1	S.M[+15.995]PLPPHPGHPGYINFS[+79.966]YEVLTPLKWYQSM[+15.995]IRHPYP.S		M[+16]*2, S[+80]	1425.69	3	4275.07	4275.04	0	7.2	17	Non	774.6	774.6	0	10.77	1032	>sp|P02817|AMELX_BOVIN Amelogenin, X isoform OS=Bos taurus OX=9913 GN=AMELX PE=1 SV=2	1	hf1_10472_ebo_22_1_261219.ScanId;v=1;d1=24378.24378.3	controllerType=0 controllerNumber=1 scan=24378	50.9952
34995:4	1	S.MPLPPHPGHPGYINFS[+79.966]YEVLTPLKWYQ[+0.984]SM[+15.995]IRHPYP.S		M[+16], Q[+1], S[+80]	1065.77	4	4260.06	4260.03	0	6.7	17	Non	795.85	795.85	54.69	11.74	1032	>sp|P02817|AMELX_BOVIN Amelogenin, X isoform OS=Bos taurus OX=9913 GN=AMELX PE=1 SV=2	1	hf1_10472_ebo_22_1_261219.ScanId;v=1;d1=25841.25841.4	controllerType=0 controllerNumber=1 scan=25841	53.61
33250:5	1	S.MP[+15.995]LPPHPGHPGYINFS[+79.966]YEVLTPLKWYQSM[+15.995]IRHPYP.S		M[+16], P[+16], S[+80]	855.818	5	4275.06	4275.04	0	5.8	17	Non	820.05	820.05	8.52	13.37	1032	>sp|P02817|AMELX_BOVIN Amelogenin, X isoform OS=Bos taurus OX=9913 GN=AMELX PE=1 SV=2	1	hf1_10472_ebo_22_1_261219.ScanId;v=1;d1=24668.24668.5	controllerType=0 controllerNumber=1 scan=24668	51.5126
32958:5	1	S.M[+15.995]PLPPHPGHPGYINFS[+79.966]YEVLTPLKWYQSM[+15.995]IRHPYP.S		M[+16]*2, S[+80]	855.819	5	4275.07	4275.04	0	7.1	17	Non	821.22	821.22	0	13.64	1032	>sp|P02817|AMELX_BOVIN Amelogenin, X isoform OS=Bos taurus OX=9913 GN=AMELX PE=1 SV=2	1	hf1_10472_ebo_22_1_261219.ScanId;v=1;d1=24474.24474.5	controllerType=0 controllerNumber=1 scan=24474	51.1675
34130:5	1	S.M[+15.995]PLPPHPGHPGYINFS[+79.966]YEVLTPLKWYQSM[+15.995]IRHPYP.S		M[+16]*2, S[+80]	856.016	5	4276.05	4275.04	1	2.1	17	Non	825.16	825.16	5.9	12.45	1032	>sp|P02817|AMELX_BOVIN Amelogenin, X isoform OS=Bos taurus OX=9913 GN=AMELX PE=1 SV=2	1	hf1_10472_ebo_22_1_261219.ScanId;v=1;d1=25257.25257.5	controllerType=0 controllerNumber=1 scan=25257	52.5664
34714:4	1	S.MPLPPHPGHPGYIN[+0.984]FS[+79.966]YEVLTPLKWYQSM[+15.995]IRHPYP.S		M[+16], N[+1], S[+80]	1065.77	4	4260.05	4260.03	0	6.1	17	Non	836.05	836.05	38.18	12.74	1032	>sp|P02817|AMELX_BOVIN Amelogenin, X isoform OS=Bos taurus OX=9913 GN=AMELX PE=1 SV=2	1	hf1_10472_ebo_22_1_261219.ScanId;v=1;d1=25647.25647.4	controllerType=0 controllerNumber=1 scan=25647	53.264
34150:4	1	S.M[+15.995]PLPPHPGHPGYINFS[+79.966]YEVLTPLKW[+15.995]YQSMIRHPYP.S		M[+16], S[+80], W[+16]	1069.77	4	4276.06	4275.04	1	3.1	17	Non	837.23	837.23	5.16	12.04	1032	>sp|P02817|AMELX_BOVIN Amelogenin, X isoform OS=Bos taurus OX=9913 GN=AMELX PE=1 SV=2	1	hf1_10472_ebo_22_1_261219.ScanId;v=1;d1=25268.25268.4	controllerType=0 controllerNumber=1 scan=25268	52.5854
33268:4	1	S.M[+15.995]PLPPHPGHPGYINFS[+79.966]YEVLTPLKWYQSM[+15.995]IRHPYP.S		M[+16]*2, S[+80]	1069.52	4	4275.06	4275.04	0	5.9	17	Non	875.21	875.21	0	13.47	1032	>sp|P02817|AMELX_BOVIN Amelogenin, X isoform OS=Bos taurus OX=9913 GN=AMELX PE=1 SV=2	1	hf1_10472_ebo_22_1_261219.ScanId;v=1;d1=24680.24680.4	controllerType=0 controllerNumber=1 scan=24680	51.5335
32679:4	1	S.M[+15.995]PLPPHPGHPGYINFS[+79.966]YEVLTPLKWYQSM[+15.995]IRHPYP.S		M[+16]*2, S[+80]	1069.52	4	4275.07	4275.04	0	6.8	17	Non	964.38	964.38	0	15.74	1032	>sp|P02817|AMELX_BOVIN Amelogenin, X isoform OS=Bos taurus OX=9913 GN=AMELX PE=1 SV=2	1	hf1_10472_ebo_22_1_261219.ScanId;v=1;d1=24286.24286.4	controllerType=0 controllerNumber=1 scan=24286	50.832
33864:4	1	S.M[+15.995]PLPPHPGHPGYINFS[+79.966]YEVLTPLKWYQSM[+15.995]IRHPYP.S		M[+16]*2, S[+80]	1069.77	4	4276.05	4275.04	1	1.4	17	Non	1047.08	1047.08	0	15.55	1032	>sp|P02817|AMELX_BOVIN Amelogenin, X isoform OS=Bos taurus OX=9913 GN=AMELX PE=1 SV=2	1	hf1_10472_ebo_22_1_261219.ScanId;v=1;d1=25075.25075.4	controllerType=0 controllerNumber=1 scan=25075	52.2349
32975:4	1	S.M[+15.995]PLPPHPGHPGYINFS[+79.966]YEVLTPLKWYQSM[+15.995]IRHPYP.S		M[+16]*2, S[+80]	1069.52	4	4275.07	4275.04	0	6.6	17	Non	1092.67	1092.67	0	17.74	1032	>sp|P02817|AMELX_BOVIN Amelogenin, X isoform OS=Bos taurus OX=9913 GN=AMELX PE=1 SV=2	1	hf1_10472_ebo_22_1_261219.ScanId;v=1;d1=24485.24485.4	controllerType=0 controllerNumber=1 scan=24485	51.1863
29806:5	1	S.MP[+15.995]LPPHPGHPGYINFS[+79.966]YEVLTPLKW[+31.990]YQSM[+15.995]IRHPYP.S		M[+16], P[+16], S[+80], W[+32]	862.218	5	4307.06	4307.03	0	8	17	Non	50.42	50.42	1.8	2.13	1032	>sp|P02817|AMELX_BOVIN Amelogenin, X isoform OS=Bos taurus OX=9913 GN=AMELX PE=1 SV=2	1	hf1_10472_ebo_22_1_261219.ScanId;v=1;d1=22348.22348.4	controllerType=0 controllerNumber=1 scan=22348	47.4177
29702:5	1	S.MP[+15.995]LPPHPGHPGYINFS[+79.966]YEVLTPLKWYQSM[+31.990]IRH[+15.995]PYP.S		H[+16], M[+32], P[+16], S[+80]	862.217	5	4307.06	4307.03	0	6.3	17	Non	84.8	84.8	3.45	2.29	1032	>sp|P02817|AMELX_BOVIN Amelogenin, X isoform OS=Bos taurus OX=9913 GN=AMELX PE=1 SV=2	1	hf1_10472_ebo_22_1_261219.ScanId;v=1;d1=22276.22276.5	controllerType=0 controllerNumber=1 scan=22276	47.2898
31221:4	1	S.M[+15.995]PLPPHPGHPGYINFS[+79.966]YEVLTP[+15.995]LKWYQSM[+31.990]IRHPYP.S		M[+16][+32], P[+16], S[+80]	1077.52	4	4307.05	4307.03	0	5.4	17	Non	136.78	136.78	0	2.13	1032	>sp|P02817|AMELX_BOVIN Amelogenin, X isoform OS=Bos taurus OX=9913 GN=AMELX PE=1 SV=2	1	hf1_10472_ebo_22_1_261219.ScanId;v=1;d1=23323.23323.4	controllerType=0 controllerNumber=1 scan=23323	49.1327
31201:5	1	S.M[+15.995]PLPPHPGHPGYINFS[+79.966]YEVLTPLKW[+31.990]YQSM[+15.995]IRHPYP.S		M[+16]*2, S[+80], W[+32]	862.217	5	4307.06	4307.03	0	6.8	17	Non	197.39	197.39	0	3.83	1032	>sp|P02817|AMELX_BOVIN Amelogenin, X isoform OS=Bos taurus OX=9913 GN=AMELX PE=1 SV=2	1	hf1_10472_ebo_22_1_261219.ScanId;v=1;d1=23310.23310.4	controllerType=0 controllerNumber=1 scan=23310	49.1104
35455:5	1	S.MPLPPHPGHPGY[+15.995]INF[+31.990]SY[+31.990]EVLTPLKWYQSM[+15.995]IRHPYP.S		F[+32], M[+16], Y[+16][+32]	852.617	5	4259.06	4259.05	0	1.3	17	Non	263.12	263.12	0.3	3.99	1032	>sp|P02817|AMELX_BOVIN Amelogenin, X isoform OS=Bos taurus OX=9913 GN=AMELX PE=1 SV=2	1	hf1_10472_ebo_22_1_261219.ScanId;v=1;d1=26153.26153.5	controllerType=0 controllerNumber=1 scan=26153	54.1658
32313:4	1	S.M[+15.995]PLPPHPGHPGYINFS[+79.966]YEVLTP[+31.990]LKWYQSM[+15.995]IRHPYP.S		M[+16]*2, P[+32], S[+80]	1077.77	4	4308.05	4307.03	1	3.4	17	Non	333.87	333.87	0	4.09	1032	>sp|P02817|AMELX_BOVIN Amelogenin, X isoform OS=Bos taurus OX=9913 GN=AMELX PE=1 SV=2	1	hf1_10472_ebo_22_1_261219.ScanId;v=1;d1=24051.24051.4	controllerType=0 controllerNumber=1 scan=24051	50.4173
37730:5	1	S.MP[+15.995]LPPHPGHP[+31.990]GYINF[+15.995]SY[+31.990]EVLTPLKWYQSMIRHPYP.S		F[+16], P[+16][+32], Y[+32]	852.818	5	4260.06	4259.05	1	1.6	17	Non	353.35	353.35	0	4.66	1032	>sp|P02817|AMELX_BOVIN Amelogenin, X isoform OS=Bos taurus OX=9913 GN=AMELX PE=1 SV=2	1	hf1_10472_ebo_22_1_261219.ScanId;v=1;d1=27642.27642.5	controllerType=0 controllerNumber=1 scan=27642	56.8171
30992:5	1	S.M[+15.995]PLPPHPGHPGYINFS[+79.966]YEVLTPLKW[+31.990]YQSM[+15.995]IRHPYP.S		M[+16]*2, S[+80], W[+32]	862.218	5	4307.06	4307.03	0	7.8	17	Non	502.59	502.59	0	6.91	1032	>sp|P02817|AMELX_BOVIN Amelogenin, X isoform OS=Bos taurus OX=9913 GN=AMELX PE=1 SV=2	1	hf1_10472_ebo_22_1_261219.ScanId;v=1;d1=23166.23166.5	controllerType=0 controllerNumber=1 scan=23166	48.8531
32469:4	1	S.M[+15.995]PLPPHPGHPGYINFS[+79.966]YEVLTPLKWYQSM[+15.995]IRHPYPS.Y		M[+16]*2, S[+80]	1091.28	4	4362.09	4362.07	0	4.2	17	Non	140.97	140.97	3.6	2.28	1032	>sp|P02817|AMELX_BOVIN Amelogenin, X isoform OS=Bos taurus OX=9913 GN=AMELX PE=1 SV=2	1	hf1_10472_ebo_22_1_261219.ScanId;v=1;d1=24147.24147.4	controllerType=0 controllerNumber=1 scan=24147	50.5869
32424:5	1	S.MP[+15.995]LPPHPGHPGYINFS[+79.966]YEVLTPLKWYQSM[+15.995]IRHPYPS.Y		M[+16], P[+16], S[+80]	873.223	5	4362.09	4362.07	0	3.5	17	Non	389.46	389.46	1.8	6.12	1032	>sp|P02817|AMELX_BOVIN Amelogenin, X isoform OS=Bos taurus OX=9913 GN=AMELX PE=1 SV=2	1	hf1_10472_ebo_22_1_261219.ScanId;v=1;d1=24121.24121.5	controllerType=0 controllerNumber=1 scan=24121	50.542
35273:4	1	S.M[+15.995]PLPPHPGHPGYIN[+0.984]FSYEVLTPLKW[+31.990]Y[+31.990]QSMIRHPYPS.Y		M[+16], N[+1], W[+32], Y[+32]	1083.77	4	4332.07	4331.07	1	-0.8	17	Non	164.31	164.31	5.8	2.12	1032	>sp|P02817|AMELX_BOVIN Amelogenin, X isoform OS=Bos taurus OX=9913 GN=AMELX PE=1 SV=2	1	hf1_10472_ebo_22_1_261219.ScanId;v=1;d1=26030.26030.4	controllerType=0 controllerNumber=1 scan=26030	53.9458
37849:5	1	S.MPLPPHPGHPGYINFS[+79.966]YEVLTPLKWYQSMIRHPYPSY.G		S[+80]	899.441	5	4493.17	4493.14	0	6.7	17	Non	196.76	196.76	1.67	3.65	1032	>sp|P02817|AMELX_BOVIN Amelogenin, X isoform OS=Bos taurus OX=9913 GN=AMELX PE=1 SV=2	1	hf1_10472_ebo_22_1_261219.ScanId;v=1;d1=27721.27721.5	controllerType=0 controllerNumber=1 scan=27721	56.9573
34201:6	1	S.MPLPPHPGHPGYINFS[+79.966]YEVLTPLKWY[+15.995]QSMIRHPYPSY.G		S[+80], Y[+16]	752.366	6	4509.16	4509.14	0	5.2	17	Non	43.23	43.23	0	1.66	1032	>sp|P02817|AMELX_BOVIN Amelogenin, X isoform OS=Bos taurus OX=9913 GN=AMELX PE=1 SV=2	1	hf1_10472_ebo_22_1_261219.ScanId;v=1;d1=25300.25300.6	controllerType=0 controllerNumber=1 scan=25300	52.6423
37150:4	1	S.M[+15.995]PLPPHPGHPGYINFS[+79.966]YEVLTPLKWYQSMIRHPYPSY.G		M[+16], S[+80]	1128.3	4	4510.19	4509.14	1	9.7	17	Non	103.85	103.85	15.31	2.1	1032	>sp|P02817|AMELX_BOVIN Amelogenin, X isoform OS=Bos taurus OX=9913 GN=AMELX PE=1 SV=2	1	hf1_10472_ebo_22_1_261219.ScanId;v=1;d1=27255.27255.4	controllerType=0 controllerNumber=1 scan=27255	56.1298
35460:5	1	S.MPLPPHPGHPGYINFS[+79.966]YEVLTPLKWYQSMIRHPY[+15.995]PSY.G		S[+80], Y[+16]	902.837	5	4510.16	4509.14	1	2.9	17	Non	129.53	129.53	0	2.14	1032	>sp|P02817|AMELX_BOVIN Amelogenin, X isoform OS=Bos taurus OX=9913 GN=AMELX PE=1 SV=2	1	hf1_10472_ebo_22_1_261219.ScanId;v=1;d1=26156.26156.5	controllerType=0 controllerNumber=1 scan=26156	54.1704
37016:5	1	S.M[+15.995]PLPPHPGHPGYINFS[+79.966]YEVLTPLKWYQSMIRHPYPSY.G		M[+16], S[+80]	902.641	5	4509.17	4509.14	0	7.8	17	Non	266.38	266.38	6.37	4.49	1032	>sp|P02817|AMELX_BOVIN Amelogenin, X isoform OS=Bos taurus OX=9913 GN=AMELX PE=1 SV=2	1	hf1_10472_ebo_22_1_261219.ScanId;v=1;d1=27168.27168.5	controllerType=0 controllerNumber=1 scan=27168	55.9715
33910:6	1	S.MPLPPHPGHPGYINFS[+79.966]YEVLTPLKW[+15.995]YQSMIRHPYPSY.G		S[+80], W[+16]	752.366	6	4509.16	4509.14	0	4.7	17	Non	271.91	271.91	0	4.47	1032	>sp|P02817|AMELX_BOVIN Amelogenin, X isoform OS=Bos taurus OX=9913 GN=AMELX PE=1 SV=2	1	hf1_10472_ebo_22_1_261219.ScanId;v=1;d1=25105.25105.6	controllerType=0 controllerNumber=1 scan=25105	52.2886
33958:4	1	S.MPLPPHPGHPGYINFS[+79.966]YEVLTPLKWYQSM[+15.995]IRHPYPSY.G		M[+16], S[+80]	1128.05	4	4509.17	4509.14	0	5.9	17	Non	567.84	567.84	12.49	6.38	1032	>sp|P02817|AMELX_BOVIN Amelogenin, X isoform OS=Bos taurus OX=9913 GN=AMELX PE=1 SV=2	1	hf1_10472_ebo_22_1_261219.ScanId;v=1;d1=25139.25139.4	controllerType=0 controllerNumber=1 scan=25139	52.3503
33823:5	1	S.MPLPPHPGHPGYINFS[+79.966]YEVLTPLKWYQSM[+15.995]IRHPYPSY.G		M[+16], S[+80]	902.639	5	4509.16	4509.14	0	5.5	17	Non	579.95	579.95	28.78	7.28	1032	>sp|P02817|AMELX_BOVIN Amelogenin, X isoform OS=Bos taurus OX=9913 GN=AMELX PE=1 SV=2	1	hf1_10472_ebo_22_1_261219.ScanId;v=1;d1=25048.25048.5	controllerType=0 controllerNumber=1 scan=25048	52.1864
34113:5	1	S.MPLPPHPGHPGYINFS[+79.966]YEVLTPLKWYQSM[+15.995]IRHPYPSY.G		M[+16], S[+80]	902.639	5	4509.16	4509.14	0	5.6	17	Non	810.58	810.58	23.95	12.93	1032	>sp|P02817|AMELX_BOVIN Amelogenin, X isoform OS=Bos taurus OX=9913 GN=AMELX PE=1 SV=2	1	hf1_10472_ebo_22_1_261219.ScanId;v=1;d1=25242.25242.5	controllerType=0 controllerNumber=1 scan=25242	52.5381
34154:4	1	S.MP[+15.995]LPPHPGHPGYINFS[+79.966]YEVLTPLKW[+15.995]YQSMIRHPYPSY.G		P[+16], S[+80], W[+16]	1132.3	4	4526.16	4525.13	1	5.3	17	Non	181.24	126.17	0	2.22	1032	>sp|P02817|AMELX_BOVIN Amelogenin, X isoform OS=Bos taurus OX=9913 GN=AMELX PE=1 SV=2	1	hf1_10472_ebo_22_1_261219.ScanId;v=1;d1=25270.25270.3	controllerType=0 controllerNumber=1 scan=25270	52.5884
35474:5	1	S.MP[+15.995]LPPHPGHPGYINFS[+79.966]YEVLTPLKWYQSM[+15.995]IRHPYPSY.G		M[+16], P[+16], S[+80]	906.035	5	4526.15	4525.13	1	2	17	Non	185.11	185.11	7.71	2.45	1032	>sp|P02817|AMELX_BOVIN Amelogenin, X isoform OS=Bos taurus OX=9913 GN=AMELX PE=1 SV=2	1	hf1_10472_ebo_22_1_261219.ScanId;v=1;d1=26165.26165.5	controllerType=0 controllerNumber=1 scan=26165	54.1868
32695:5	1	S.M[+15.995]PLPPHPGHPGYINFS[+79.966]YEVLTPLKW[+31.990]YQSMIRHPYPSY.G		M[+16], S[+80], W[+32]	909.036	5	4541.15	4541.13	0	4.6	17	Non	243.32	243.32	0.96	4.23	1032	>sp|P02817|AMELX_BOVIN Amelogenin, X isoform OS=Bos taurus OX=9913 GN=AMELX PE=1 SV=2	1	hf1_10472_ebo_22_1_261219.ScanId;v=1;d1=24296.24296.5	controllerType=0 controllerNumber=1 scan=24296	50.8499
32985:6	1	S.MP[+15.995]LPPHPGHPGYINFS[+79.966]YEVLTPLK[+15.995]WYQSMIRHPYPSY.G		K[+16], P[+16], S[+80]	755.032	6	4525.15	4525.13	0	4.7	17	Non	275.02	275.02	0	4.48	1032	>sp|P02817|AMELX_BOVIN Amelogenin, X isoform OS=Bos taurus OX=9913 GN=AMELX PE=1 SV=2	1	hf1_10472_ebo_22_1_261219.ScanId;v=1;d1=24491.24491.6	controllerType=0 controllerNumber=1 scan=24491	51.1953
35177:5	1	S.MPLPPHPGHPGYINFS[+79.966]YEVLTPLKWY[+15.995]QSMIR[+0.984]HPYPSY.G		R[+1], S[+80], Y[+16]	902.836	5	4510.15	4510.12	0	5.6	17	Non	295.71	295.71	0	4.8	1032	>sp|P02817|AMELX_BOVIN Amelogenin, X isoform OS=Bos taurus OX=9913 GN=AMELX PE=1 SV=2	1	hf1_10472_ebo_22_1_261219.ScanId;v=1;d1=25964.25964.5	controllerType=0 controllerNumber=1 scan=25964	53.8263
34471:4	1	S.M[+15.995]PLPPHPGHPGYINFS[+79.966]YEVLTPLKWYQSM[+15.995]IRHPYPSY.G		M[+16]*2, S[+80]	1132.3	4	4526.16	4525.13	1	5.8	17	Non	343.64	343.64	0	4.1	1032	>sp|P02817|AMELX_BOVIN Amelogenin, X isoform OS=Bos taurus OX=9913 GN=AMELX PE=1 SV=2	1	hf1_10472_ebo_22_1_261219.ScanId;v=1;d1=25477.25477.4	controllerType=0 controllerNumber=1 scan=25477	52.9544
33290:6	1	S.MP[+15.995]LPPHPGHPGYINFS[+79.966]YEVLTPLKWY[+15.995]QSMIRHPYPSY.G		P[+16], S[+80], Y[+16]	755.034	6	4525.17	4525.13	0	7.4	17	Non	343.76	343.76	0	5.4	1032	>sp|P02817|AMELX_BOVIN Amelogenin, X isoform OS=Bos taurus OX=9913 GN=AMELX PE=1 SV=2	1	hf1_10472_ebo_22_1_261219.ScanId;v=1;d1=24692.24692.6	controllerType=0 controllerNumber=1 scan=24692	51.5544
33276:4	1	S.M[+15.995]PLPPHPGHPGYINFS[+79.966]YEVLTPLKWYQSM[+15.995]IRHPYPSY.G		M[+16]*2, S[+80]	1132.05	4	4525.17	4525.13	0	7.4	17	Non	393.37	393.37	6.93	5.48	1032	>sp|P02817|AMELX_BOVIN Amelogenin, X isoform OS=Bos taurus OX=9913 GN=AMELX PE=1 SV=2	1	hf1_10472_ebo_22_1_261219.ScanId;v=1;d1=24684.24684.3	controllerType=0 controllerNumber=1 scan=24684	51.5395
34561:5	1	S.M[+15.995]PLPPHPGHPGYINFS[+79.966]YEVLTPLKWYQSM[+15.995]IRHPYPSY.G		M[+16]*2, S[+80]	905.835	5	4525.15	4525.13	0	2.7	17	Non	433.27	433.27	15.64	5.68	1032	>sp|P02817|AMELX_BOVIN Amelogenin, X isoform OS=Bos taurus OX=9913 GN=AMELX PE=1 SV=2	1	hf1_10472_ebo_22_1_261219.ScanId;v=1;d1=25541.25541.5	controllerType=0 controllerNumber=1 scan=25541	53.0706
34269:5	1	S.MP[+15.995]LPPHPGHPGYINFS[+79.966]YEVLTPLKWYQSM[+15.995]IRHPYPSY.G		M[+16], P[+16], S[+80]	906.034	5	4526.14	4525.13	1	1.4	17	Non	468.26	468.26	11.56	5.28	1032	>sp|P02817|AMELX_BOVIN Amelogenin, X isoform OS=Bos taurus OX=9913 GN=AMELX PE=1 SV=2	1	hf1_10472_ebo_22_1_261219.ScanId;v=1;d1=25348.25348.5	controllerType=0 controllerNumber=1 scan=25348	52.7284
33990:5	1	S.MP[+15.995]LPPHPGHPGYINFS[+79.966]YEVLTPLKWYQSM[+15.995]IRHPYPSY.G		M[+16], P[+16], S[+80]	905.832	5	4525.13	4525.13	0	-0.1	17	Non	470.34	470.34	12.01	5.38	1032	>sp|P02817|AMELX_BOVIN Amelogenin, X isoform OS=Bos taurus OX=9913 GN=AMELX PE=1 SV=2	1	hf1_10472_ebo_22_1_261219.ScanId;v=1;d1=25159.25159.5	controllerType=0 controllerNumber=1 scan=25159	52.386
33543:5	1	S.M[+15.995]PLPPHPGHPGYINFS[+79.966]YEVLTPLK[+15.995]WYQSMIRHPYPSY.G		K[+16], M[+16], S[+80]	905.836	5	4525.15	4525.13	0	4	17	Non	593.45	593.45	0	7.5	1032	>sp|P02817|AMELX_BOVIN Amelogenin, X isoform OS=Bos taurus OX=9913 GN=AMELX PE=1 SV=2	1	hf1_10472_ebo_22_1_261219.ScanId;v=1;d1=24855.24855.5	controllerType=0 controllerNumber=1 scan=24855	51.8421
32949:5	1	S.M[+15.995]PLPPHPGHPGYINFS[+79.966]YEVLTPLK[+15.995]WYQSMIRHPYPSY.G		K[+16], M[+16], S[+80]	905.838	5	4525.16	4525.13	0	5.8	17	Non	716.06	716.06	0	10.93	1032	>sp|P02817|AMELX_BOVIN Amelogenin, X isoform OS=Bos taurus OX=9913 GN=AMELX PE=1 SV=2	1	hf1_10472_ebo_22_1_261219.ScanId;v=1;d1=24468.24468.5	controllerType=0 controllerNumber=1 scan=24468	51.1556
33021:4	1	S.M[+15.995]PLPPHPGHPGYINFS[+79.966]YEVLTPLKWYQSM[+15.995]IRHPYPSY.G		M[+16]*2, S[+80]	1132.05	4	4525.16	4525.13	0	6.7	17	Non	828.29	828.29	0	12.3	1032	>sp|P02817|AMELX_BOVIN Amelogenin, X isoform OS=Bos taurus OX=9913 GN=AMELX PE=1 SV=2	1	hf1_10472_ebo_22_1_261219.ScanId;v=1;d1=24513.24513.4	controllerType=0 controllerNumber=1 scan=24513	51.2335
33235:5	1	S.M[+15.995]PLPPHPGHPGYINFS[+79.966]YEVLTPLKWYQSM[+15.995]IRHPYPSY.G		M[+16]*2, S[+80]	905.838	5	4525.16	4525.13	0	5.9	17	Non	852.38	852.38	0	13.93	1032	>sp|P02817|AMELX_BOVIN Amelogenin, X isoform OS=Bos taurus OX=9913 GN=AMELX PE=1 SV=2	1	hf1_10472_ebo_22_1_261219.ScanId;v=1;d1=24657.24657.5	controllerType=0 controllerNumber=1 scan=24657	51.4932
31227:6	1	S.MP[+15.995]LPPHPGHPGYINFS[+79.966]YEVLTPLK[+15.995]WY[+31.990]QSMIRHPYPSY.G		K[+16], P[+16], S[+80], Y[+32]	760.365	6	4557.15	4557.12	0	6.1	17	Non	70.58	70.58	0	2.3	1032	>sp|P02817|AMELX_BOVIN Amelogenin, X isoform OS=Bos taurus OX=9913 GN=AMELX PE=1 SV=2	1	hf1_10472_ebo_22_1_261219.ScanId;v=1;d1=23326.23326.6	controllerType=0 controllerNumber=1 scan=23326	49.1372
32142:5	1	S.M[+15.995]PLPPHPGHPGYINFS[+79.966]YEVLTP[+15.995]LKWY[+31.990]QSMIRHPYPSY.G		M[+16], P[+16], S[+80], Y[+32]	912.435	5	4558.15	4557.12	1	4.5	17	Non	259.78	259.78	0	4.47	1032	>sp|P02817|AMELX_BOVIN Amelogenin, X isoform OS=Bos taurus OX=9913 GN=AMELX PE=1 SV=2	1	hf1_10472_ebo_22_1_261219.ScanId;v=1;d1=23931.23931.5	controllerType=0 controllerNumber=1 scan=23931	50.2065
32436:5	1	S.M[+15.995]PLPPHPGHPGYINFS[+79.966]YEVLTPLK[+15.995]WYQSM[+31.990]IRHPYPSY.G		K[+16], M[+16][+32], S[+80]	912.234	5	4557.14	4557.12	0	3.3	17	Non	262.12	262.12	0	4.06	1032	>sp|P02817|AMELX_BOVIN Amelogenin, X isoform OS=Bos taurus OX=9913 GN=AMELX PE=1 SV=2	1	hf1_10472_ebo_22_1_261219.ScanId;v=1;d1=24129.24129.5	controllerType=0 controllerNumber=1 scan=24129	50.5568
31207:4	1	S.M[+15.995]PLPPHPGHPGYINFS[+79.966]YEVLTPLKW[+31.990]Y[+15.995]QSMIRHPYPSY.G		M[+16], S[+80], W[+32], Y[+16]	1139.79	4	4556.15	4557.12	-1	7.2	17	Non	264.3	264.3	0	3.85	1032	>sp|P02817|AMELX_BOVIN Amelogenin, X isoform OS=Bos taurus OX=9913 GN=AMELX PE=1 SV=2	1	hf1_10472_ebo_22_1_261219.ScanId;v=1;d1=23313.23313.4	controllerType=0 controllerNumber=1 scan=23313	49.1149
31118:5	1	S.MP[+15.995]LPPHPGHPGYINFS[+79.966]YEVLTPLKWY[+31.990]QSM[+15.995]IRHPYPSY.G		M[+16], P[+16], S[+80], Y[+32]	912.037	5	4556.15	4557.12	-1	7.6	17	Non	344.96	344.96	0	5.26	1032	>sp|P02817|AMELX_BOVIN Amelogenin, X isoform OS=Bos taurus OX=9913 GN=AMELX PE=1 SV=2	1	hf1_10472_ebo_22_1_261219.ScanId;v=1;d1=23254.23254.5	controllerType=0 controllerNumber=1 scan=23254	49.0104
31419:5	1	S.MP[+15.995]LPPHPGHPGYINFS[+79.966]YEVLTPLKW[+31.990]YQSM[+15.995]IRHPYPSY.G		M[+16], P[+16], S[+80], W[+32]	912.237	5	4557.16	4557.12	0	7.1	17	Non	576.78	576.78	0	7.55	1032	>sp|P02817|AMELX_BOVIN Amelogenin, X isoform OS=Bos taurus OX=9913 GN=AMELX PE=1 SV=2	1	hf1_10472_ebo_22_1_261219.ScanId;v=1;d1=23455.23455.5	controllerType=0 controllerNumber=1 scan=23455	49.3685
33560:5	1	S.MPLPPHPGHPGYINFS[+79.966]YEVLTPLKWYQSMIRH[+15.995]PYPSYG.Y		H[+16], S[+80]	914.246	5	4567.2	4566.16	1	7.7	17	Non	293.33	293.33	4	5.07	1032	>sp|P02817|AMELX_BOVIN Amelogenin, X isoform OS=Bos taurus OX=9913 GN=AMELX PE=1 SV=2	1	hf1_10472_ebo_22_1_261219.ScanId;v=1;d1=24867.24867.5	controllerType=0 controllerNumber=1 scan=24867	51.863
34141:5	1	S.MP[+15.995]LPPHPGHPGYINFS[+79.966]YEVLTPLKW[+15.995]YQSMIRHPYPSYG.Y		P[+16], S[+80], W[+16]	917.241	5	4582.18	4582.16	0	4.6	17	Non	202.23	202.23	0	3.68	1032	>sp|P02817|AMELX_BOVIN Amelogenin, X isoform OS=Bos taurus OX=9913 GN=AMELX PE=1 SV=2	1	hf1_10472_ebo_22_1_261219.ScanId;v=1;d1=25263.25263.5	controllerType=0 controllerNumber=1 scan=25263	52.575
32731:4	1	S.M[+15.995]PLPPHPGHPGYINFS[+79.966]YEVLTPLKWYQSM[+15.995]IRHPYPSYG.Y		M[+16]*2, S[+80]	1146.55	4	4583.18	4582.16	1	4.7	17	Non	269.09	269.09	0	3.59	1032	>sp|P02817|AMELX_BOVIN Amelogenin, X isoform OS=Bos taurus OX=9913 GN=AMELX PE=1 SV=2	1	hf1_10472_ebo_22_1_261219.ScanId;v=1;d1=24321.24321.4	controllerType=0 controllerNumber=1 scan=24321	50.8928
32999:5	1	S.MP[+15.995]LPPHPGHPGYINFS[+79.966]YEVLTPLKWYQSM[+15.995]IRHPYPSYG.Y		M[+16], P[+16], S[+80]	917.244	5	4582.19	4582.16	0	7.6	17	Non	271.45	271.45	1.68	4.74	1032	>sp|P02817|AMELX_BOVIN Amelogenin, X isoform OS=Bos taurus OX=9913 GN=AMELX PE=1 SV=2	1	hf1_10472_ebo_22_1_261219.ScanId;v=1;d1=24500.24500.3	controllerType=0 controllerNumber=1 scan=24500	51.2117
36754:5	1	S.MP[+15.995]LPPHPGHP[+31.990]GY[+31.990]INF[+15.995]SYEVLTPLKWYQSMIRHPYPSYG.Y		F[+16], P[+16][+32], Y[+32]	914.043	5	4566.18	4566.17	0	3.6	17	Non	174.22	174.22	0	2.99	1032	>sp|P02817|AMELX_BOVIN Amelogenin, X isoform OS=Bos taurus OX=9913 GN=AMELX PE=1 SV=2	1	hf1_10472_ebo_22_1_261219.ScanId;v=1;d1=26999.26999.5	controllerType=0 controllerNumber=1 scan=26999	55.6709
35364:5	1	S.MP[+15.995]LPPHPGHPGY[+15.995]INFSYEVLTPLKWYQSMIRHPYPSYGYEP.M		P[+16], Y[+16]	979.083	5	4891.38	4891.35	0	7.6	17	Non	3.61	3.61	3.61	1.42	1032	>sp|P02817|AMELX_BOVIN Amelogenin, X isoform OS=Bos taurus OX=9913 GN=AMELX PE=1 SV=2	1	hf1_10472_ebo_22_1_261219.ScanId;v=1;d1=26092.26092.5	controllerType=0 controllerNumber=1 scan=26092	54.0564
33334:5	1	S.M[+15.995]PLPPHPGHPGYINFS[+79.966]YEVLTP[+15.995]LKWYQSMIRHPYPSYGYEP.M		M[+16], P[+16], S[+80]	995.074	5	4971.34	4971.31	0	5.8	17	Non	109.56	109.56	0	2.14	1032	>sp|P02817|AMELX_BOVIN Amelogenin, X isoform OS=Bos taurus OX=9913 GN=AMELX PE=1 SV=2	1	hf1_10472_ebo_22_1_261219.ScanId;v=1;d1=24720.24720.5	controllerType=0 controllerNumber=1 scan=24720	51.6024
32738:5	1	S.M[+15.995]PLPPHPGHPGYINFSYEVLTPLKWYQSMIRHPYPSYGYEPM[+15.995].G		M[+16]*2	1005.49	5	5023.4	5022.39	1	2.3	17	Non	35.66	35.66	9.02	2.1	1032	>sp|P02817|AMELX_BOVIN Amelogenin, X isoform OS=Bos taurus OX=9913 GN=AMELX PE=1 SV=2	1	hf1_10472_ebo_22_1_261219.ScanId;v=1;d1=24326.24326.5	controllerType=0 controllerNumber=1 scan=24326	50.9032
34346:5	1	S.M[+15.995]PLPPHPGHPGYINFS[+79.966]YEVLTPLKWYQSMIRHPYPSYGYEPM[+15.995].G		M[+16]*2, S[+80]	1021.28	5	5102.39	5102.35	0	6.7	17	Non	1.75	1.75	0.87	2.14	1032	>sp|P02817|AMELX_BOVIN Amelogenin, X isoform OS=Bos taurus OX=9913 GN=AMELX PE=1 SV=2	1	hf1_10472_ebo_22_1_261219.ScanId;v=1;d1=25397.25397.5	controllerType=0 controllerNumber=1 scan=25397	52.8136
36918:5	1	S.M[+15.995]PLPPHPGHPGYINFS[+79.966]YEVLTPLKWYQSMIRHPYPSYGYEPM[+15.995].G		M[+16]*2, S[+80]	1021.08	5	5101.39	5102.35	-1	8	17	Non	48.1	48.1	0	2.23	1032	>sp|P02817|AMELX_BOVIN Amelogenin, X isoform OS=Bos taurus OX=9913 GN=AMELX PE=1 SV=2	1	hf1_10472_ebo_22_1_261219.ScanId;v=1;d1=27108.27108.5	controllerType=0 controllerNumber=1 scan=27108	55.8659
33849:5	1	S.MP[+15.995]LPPHPGHPGYINFS[+79.966]YEVLTPLKW[+31.990]YQSMIRHPYPSYGYEPM.G		P[+16], S[+80], W[+32]	1024.68	5	5119.38	5118.35	1	4.9	17	Non	66.77	66.77	0	2.17	1032	>sp|P02817|AMELX_BOVIN Amelogenin, X isoform OS=Bos taurus OX=9913 GN=AMELX PE=1 SV=2	1	hf1_10472_ebo_22_1_261219.ScanId;v=1;d1=25066.25066.5	controllerType=0 controllerNumber=1 scan=25066	52.2185
33769:5	1	S.MPLPPHPGHPGYINFS[+79.966]YEVLTPLKWYQSM[+31.990]IR[+0.984]HPYPSYGYEPM.G		M[+32], R[+1], S[+80]	1021.68	5	5104.38	5103.34	1	8.3	17	Non	78.18	43.63	0	2.12	1032	>sp|P02817|AMELX_BOVIN Amelogenin, X isoform OS=Bos taurus OX=9913 GN=AMELX PE=1 SV=2	1	hf1_10472_ebo_22_1_261219.ScanId;v=1;d1=25009.25009.5	controllerType=0 controllerNumber=1 scan=25009	52.115
33442:5	1	S.MP[+15.995]LPPHPGHPGYINFS[+79.966]YEVLTP[+31.990]LKWYQSMIRHPYPSYGYEPM.G		P[+16][+32], S[+80]	1024.48	5	5118.37	5118.35	0	4.3	17	Non	130.23	130.23	0	2.66	1032	>sp|P02817|AMELX_BOVIN Amelogenin, X isoform OS=Bos taurus OX=9913 GN=AMELX PE=1 SV=2	1	hf1_10472_ebo_22_1_261219.ScanId;v=1;d1=24789.24789.5	controllerType=0 controllerNumber=1 scan=24789	51.7263
33768:5	1	S.MPLPPHPGHPGYINFS[+79.966]YEVLTPLKWYQSM[+15.995]IRHPYPSYGYEPM[+15.995].G		M[+16]*2, S[+80]	1021.08	5	5101.38	5102.35	-1	4.9	17	Non	230.9	230.9	0	3.67	1032	>sp|P02817|AMELX_BOVIN Amelogenin, X isoform OS=Bos taurus OX=9913 GN=AMELX PE=1 SV=2	1	hf1_10472_ebo_22_1_261219.ScanId;v=1;d1=25009.25009.5	controllerType=0 controllerNumber=1 scan=25009	52.115
34050:5	1	S.MPLPPHPGHPGYINFS[+79.966]YEVLTPLKWYQSM[+15.995]IRHPYPSYGYEPM[+15.995].G		M[+16]*2, S[+80]	1021.28	5	5102.38	5102.35	0	4.7	17	Non	237.59	237.59	0	3.91	1032	>sp|P02817|AMELX_BOVIN Amelogenin, X isoform OS=Bos taurus OX=9913 GN=AMELX PE=1 SV=2	1	hf1_10472_ebo_22_1_261219.ScanId;v=1;d1=25200.25200.5	controllerType=0 controllerNumber=1 scan=25200	52.4615
33107:4	1	S.M[+15.995]PLPPHPGHPGYINFS[+79.966]YEVLTPLKW[+31.990]YQSMIRHPYPSYGYEPM.G		M[+16], S[+80], W[+32]	1280.6	4	5119.39	5118.35	1	6.6	17	Non	293.47	293.47	0	4.16	1032	>sp|P02817|AMELX_BOVIN Amelogenin, X isoform OS=Bos taurus OX=9913 GN=AMELX PE=1 SV=2	1	hf1_10472_ebo_22_1_261219.ScanId;v=1;d1=24568.24568.4	controllerType=0 controllerNumber=1 scan=24568	51.3308
32945:4	1	S.M[+15.995]PLPPHPGHPGYINFS[+79.966]YEVLTPLKWYQSM[+31.990]IRHPYPSYGYEPM.G		M[+16][+32], S[+80]	1280.35	4	5118.39	5118.35	0	8.9	17	Non	307.08	307.08	3.6	3.78	1032	>sp|P02817|AMELX_BOVIN Amelogenin, X isoform OS=Bos taurus OX=9913 GN=AMELX PE=1 SV=2	1	hf1_10472_ebo_22_1_261219.ScanId;v=1;d1=24464.24464.4	controllerType=0 controllerNumber=1 scan=24464	51.1496
33146:5	1	S.M[+15.995]PLPPHPGHPGYINFS[+79.966]YEVLTPLKWYQSM[+31.990]IRHPYPSYGYEPM.G		M[+16][+32], S[+80]	1024.48	5	5118.38	5118.35	0	6.6	17	Non	394.91	394.91	3.38	6.46	1032	>sp|P02817|AMELX_BOVIN Amelogenin, X isoform OS=Bos taurus OX=9913 GN=AMELX PE=1 SV=2	1	hf1_10472_ebo_22_1_261219.ScanId;v=1;d1=24595.24595.5	controllerType=0 controllerNumber=1 scan=24595	51.38
32762:5	1	S.M[+15.995]PLPPHPGHPGYINFS[+79.966]YEVLTPLKWYQSM[+31.990]IRHPYPSYGYEPMG.G		M[+16][+32], S[+80]	1035.89	5	5175.4	5175.37	0	6.3	17	Non	138	138	1.5	2.87	1032	>sp|P02817|AMELX_BOVIN Amelogenin, X isoform OS=Bos taurus OX=9913 GN=AMELX PE=1 SV=2	1	hf1_10472_ebo_22_1_261219.ScanId;v=1;d1=24342.24342.5	controllerType=0 controllerNumber=1 scan=24342	50.9296
32680:5	1	S.M[+15.995]PLPPHPGHPGYINFS[+79.966]YEVLTPLKWYQSM[+31.990]IRHPYPSYGYEPMGG.W		M[+16][+32], S[+80]	1047.29	5	5232.43	5232.39	0	7	17	Non	155.32	155.32	0	2.87	1032	>sp|P02817|AMELX_BOVIN Amelogenin, X isoform OS=Bos taurus OX=9913 GN=AMELX PE=1 SV=2	1	hf1_10472_ebo_22_1_261219.ScanId;v=1;d1=24287.24287.5	controllerType=0 controllerNumber=1 scan=24287	50.8335
34533:4	1	S.MP[+15.995]LPPHPGHPGYINFS[+79.966]YEVLTPLKW[+31.990]YQSMIRHPYPSYGYEPMGGW.L		P[+16], S[+80], W[+32]	1355.38	4	5418.51	5418.47	0	7.7	17	Non	14.99	14.99	0	2.13	1032	>sp|P02817|AMELX_BOVIN Amelogenin, X isoform OS=Bos taurus OX=9913 GN=AMELX PE=1 SV=2	1	hf1_10472_ebo_22_1_261219.ScanId;v=1;d1=25522.25522.4	controllerType=0 controllerNumber=1 scan=25522	53.0334
35526:5	1	S.MPLPPHPGHPGYINFS[+79.966]YEVLTPLKW[+15.995]YQSMIRHPYPSYGYEP[+15.995]MGGW.L		P[+16], S[+80], W[+16]	1081.31	5	5402.52	5402.48	0	8.9	17	Non	49.64	49.64	0	2.12	1032	>sp|P02817|AMELX_BOVIN Amelogenin, X isoform OS=Bos taurus OX=9913 GN=AMELX PE=1 SV=2	1	hf1_10472_ebo_22_1_261219.ScanId;v=1;d1=26198.26198.5	controllerType=0 controllerNumber=1 scan=26198	54.2451
35068:5	1	S.M[+15.995]PLPPHPGHPGYINFS[+79.966]YEVLTPLKWYQSM[+31.990]IRHPYPSYGYEPMGGW.L		M[+16][+32], S[+80]	1084.5	5	5418.49	5418.47	0	3.7	17	Non	133.98	133.98	2.1	2.17	1032	>sp|P02817|AMELX_BOVIN Amelogenin, X isoform OS=Bos taurus OX=9913 GN=AMELX PE=1 SV=2	1	hf1_10472_ebo_22_1_261219.ScanId;v=1;d1=25888.25888.5	controllerType=0 controllerNumber=1 scan=25888	53.6924
34644:4	1	S.M[+15.995]PLPPHPGHPGYINFS[+79.966]YEVLTP[+31.990]LKWYQSMIRHPYPSYGYEPMGGW.L		M[+16], P[+32], S[+80]	1355.38	4	5418.51	5418.47	0	7.3	17	Non	156.37	156.37	0	2.42	1032	>sp|P02817|AMELX_BOVIN Amelogenin, X isoform OS=Bos taurus OX=9913 GN=AMELX PE=1 SV=2	1	hf1_10472_ebo_22_1_261219.ScanId;v=1;d1=25595.25595.4	controllerType=0 controllerNumber=1 scan=25595	53.1664
34572:6	1	S.MP[+15.995]LPPHPGHPGYINFS[+79.966]YEVLTPLKWYQSM[+31.990]IRHPYPSYGYEPMGGW.L		M[+32], P[+16], S[+80]	903.924	6	5418.51	5418.47	0	7.3	17	Non	183.32	183.32	0	2.94	1032	>sp|P02817|AMELX_BOVIN Amelogenin, X isoform OS=Bos taurus OX=9913 GN=AMELX PE=1 SV=2	1	hf1_10472_ebo_22_1_261219.ScanId;v=1;d1=25549.25549.6	controllerType=0 controllerNumber=1 scan=25549	53.0855
35232:5	1	S.MPLPPHPGHPGYINFS[+79.966]YEVLTPLKWYQSMIRH[+15.995]PYPSYGYEP[+15.995]MGGW.L		H[+16], P[+16], S[+80]	1081.31	5	5402.51	5402.48	0	5.5	17	Non	251.67	251.67	0	4.71	1032	>sp|P02817|AMELX_BOVIN Amelogenin, X isoform OS=Bos taurus OX=9913 GN=AMELX PE=1 SV=2	1	hf1_10472_ebo_22_1_261219.ScanId;v=1;d1=26003.26003.5	controllerType=0 controllerNumber=1 scan=26003	53.8965
34484:5	1	S.M[+15.995]PLPPHPGHPGYINFS[+79.966]YEVLTPLKWYQSMIRHPYPSYGYEP[+31.990]MGGW.L		M[+16], P[+32], S[+80]	1084.51	5	5418.51	5418.47	0	7.8	17	Non	360.44	360.44	0	6.46	1032	>sp|P02817|AMELX_BOVIN Amelogenin, X isoform OS=Bos taurus OX=9913 GN=AMELX PE=1 SV=2	1	hf1_10472_ebo_22_1_261219.ScanId;v=1;d1=25487.25487.5	controllerType=0 controllerNumber=1 scan=25487	52.9722
34759:5	1	S.M[+15.995]PLPPHPGHPGYINFS[+79.966]YEVLTPLKW[+31.990]YQSMIRHPYPSYGYEPMGGW.L		M[+16], S[+80], W[+32]	1084.51	5	5418.51	5418.47	0	6.7	17	Non	486.08	486.08	1.81	6.71	1032	>sp|P02817|AMELX_BOVIN Amelogenin, X isoform OS=Bos taurus OX=9913 GN=AMELX PE=1 SV=2	1	hf1_10472_ebo_22_1_261219.ScanId;v=1;d1=25678.25678.5	controllerType=0 controllerNumber=1 scan=25678	53.3192
33627:5	1	S.MPLPPHPGHPGYINFS[+79.966]YEVLTP[+31.990]LKWYQSMIRHPYPSYGYEPM[+15.995]GGW[+15.995].L		M[+16], P[+32], S[+80], W[+16]	1087.71	5	5434.5	5434.47	0	5.9	17	Non	91.67	91.67	3.62	2.17	1032	>sp|P02817|AMELX_BOVIN Amelogenin, X isoform OS=Bos taurus OX=9913 GN=AMELX PE=1 SV=2	1	hf1_10472_ebo_22_1_261219.ScanId;v=1;d1=24916.24916.5	controllerType=0 controllerNumber=1 scan=24916	51.9499
34265:5	1	S.MP[+15.995]LPPHPGHPGYINFS[+79.966]YEVLTP[+31.990]LKWYQSMIRHPYPSYGYEPM[+15.995]GGW.L		M[+16], P[+16][+32], S[+80]	1087.71	5	5434.51	5434.47	0	7.6	17	Non	204.43	204.43	0	3.93	1032	>sp|P02817|AMELX_BOVIN Amelogenin, X isoform OS=Bos taurus OX=9913 GN=AMELX PE=1 SV=2	1	hf1_10472_ebo_22_1_261219.ScanId;v=1;d1=25345.25345.5	controllerType=0 controllerNumber=1 scan=25345	52.721
09510:2	1	M.PLPPHPGH.P			426.233	2	851.458	851.452	0	6.7	18	Non	296.92	107.3	107.3	2.34	1032	>sp|P02817|AMELX_BOVIN Amelogenin, X isoform OS=Bos taurus OX=9913 GN=AMELX PE=1 SV=2	1	hf1_10472_ebo_22_1_261219.ScanId;v=1;d1=8576.8576.2	controllerType=0 controllerNumber=1 scan=8576	23.5247
08757:2	1	M.PLPPHPGHPGY.I			584.802	2	1168.6	1168.59	0	5.4	18	Non	256.92	227.49	227.49	3.55	1032	>sp|P02817|AMELX_BOVIN Amelogenin, X isoform OS=Bos taurus OX=9913 GN=AMELX PE=1 SV=2	1	hf1_10472_ebo_22_1_261219.ScanId;v=1;d1=8076.8076.2	controllerType=0 controllerNumber=1 scan=8076	22.6509
08869:2	1	M.PLPPHPGHPGY.I			584.802	2	1168.6	1168.59	0	5	18	Non	257	150.72	150.72	2.57	1032	>sp|P02817|AMELX_BOVIN Amelogenin, X isoform OS=Bos taurus OX=9913 GN=AMELX PE=1 SV=2	1	hf1_10472_ebo_22_1_261219.ScanId;v=1;d1=8155.8155.2	controllerType=0 controllerNumber=1 scan=8155	22.7881
08553:2	1	M.PLPPHPGHPGY.I			584.802	2	1168.6	1168.59	0	5.1	18	Non	318.62	283.67	283.67	4.05	1032	>sp|P02817|AMELX_BOVIN Amelogenin, X isoform OS=Bos taurus OX=9913 GN=AMELX PE=1 SV=2	1	hf1_10472_ebo_22_1_261219.ScanId;v=1;d1=7936.7936.2	controllerType=0 controllerNumber=1 scan=7936	22.4067
08412:2	1	M.PLPPHPGHPGY.I			584.801	2	1168.59	1168.59	0	4	18	Non	362.08	331.72	331.72	3.91	1032	>sp|P02817|AMELX_BOVIN Amelogenin, X isoform OS=Bos taurus OX=9913 GN=AMELX PE=1 SV=2	1	hf1_10472_ebo_22_1_261219.ScanId;v=1;d1=7839.7839.2	controllerType=0 controllerNumber=1 scan=7839	22.2377
09514:3	1	M.PLPPHPGHPGY.I			390.204	3	1168.6	1168.59	0	6	18	Non	367.71	258.05	258.05	4.23	1032	>sp|P02817|AMELX_BOVIN Amelogenin, X isoform OS=Bos taurus OX=9913 GN=AMELX PE=1 SV=2	1	hf1_10472_ebo_22_1_261219.ScanId;v=1;d1=8581.8581.3	controllerType=0 controllerNumber=1 scan=8581	23.535
08329:3	1	M.PLPPHPGHPGY.I			390.203	3	1168.6	1168.59	0	4.5	18	Non	411.93	386.29	386.29	5.18	1032	>sp|P02817|AMELX_BOVIN Amelogenin, X isoform OS=Bos taurus OX=9913 GN=AMELX PE=1 SV=2	1	hf1_10472_ebo_22_1_261219.ScanId;v=1;d1=7779.7779.3	controllerType=0 controllerNumber=1 scan=7779	22.1339
08913:3	1	M.PLPPHPGHPGY.I			390.204	3	1168.6	1168.59	0	5.4	18	Non	426.35	344.59	344.59	5.21	1032	>sp|P02817|AMELX_BOVIN Amelogenin, X isoform OS=Bos taurus OX=9913 GN=AMELX PE=1 SV=2	1	hf1_10472_ebo_22_1_261219.ScanId;v=1;d1=8182.8182.3	controllerType=0 controllerNumber=1 scan=8182	22.8369
08624:3	1	M.PLPPHPGHPGY.I			390.204	3	1168.6	1168.59	0	6	18	Non	487.34	418.94	418.94	6.15	1032	>sp|P02817|AMELX_BOVIN Amelogenin, X isoform OS=Bos taurus OX=9913 GN=AMELX PE=1 SV=2	1	hf1_10472_ebo_22_1_261219.ScanId;v=1;d1=7984.7984.3	controllerType=0 controllerNumber=1 scan=7984	22.4914
09218:3	1	M.PLPPHPGHPGY.I			390.204	3	1168.6	1168.59	0	6.1	18	Non	503.89	410.3	410.3	6.15	1032	>sp|P02817|AMELX_BOVIN Amelogenin, X isoform OS=Bos taurus OX=9913 GN=AMELX PE=1 SV=2	1	hf1_10472_ebo_22_1_261219.ScanId;v=1;d1=8382.8382.3	controllerType=0 controllerNumber=1 scan=8382	23.1862
10651:3	1	M.PLPPHPGHPGYIN.F			465.913	3	1395.72	1395.72	0	5.1	18	Non	230.85	208.16	208.16	2.83	1032	>sp|P02817|AMELX_BOVIN Amelogenin, X isoform OS=Bos taurus OX=9913 GN=AMELX PE=1 SV=2	1	hf1_10472_ebo_22_1_261219.ScanId;v=1;d1=9343.9343.3	controllerType=0 controllerNumber=1 scan=9343	24.8591
11526:3	1	M.PLPPHPGHPGYIN.F			465.913	3	1395.73	1395.72	0	6.2	18	Non	320.11	320.11	320.11	4.33	1032	>sp|P02817|AMELX_BOVIN Amelogenin, X isoform OS=Bos taurus OX=9913 GN=AMELX PE=1 SV=2	1	hf1_10472_ebo_22_1_261219.ScanId;v=1;d1=9953.9953.3	controllerType=0 controllerNumber=1 scan=9953	25.9235
10950:3	1	M.PLPPHPGHPGYIN.F			465.913	3	1395.72	1395.72	0	5.4	18	Non	392.99	373.9	373.9	6.06	1032	>sp|P02817|AMELX_BOVIN Amelogenin, X isoform OS=Bos taurus OX=9913 GN=AMELX PE=1 SV=2	1	hf1_10472_ebo_22_1_261219.ScanId;v=1;d1=9546.9546.3	controllerType=0 controllerNumber=1 scan=9546	25.2129
11224:3	1	M.PLPPHPGHPGYIN.F			465.913	3	1395.72	1395.72	0	5.1	18	Non	415.51	381.94	381.94	5.41	1032	>sp|P02817|AMELX_BOVIN Amelogenin, X isoform OS=Bos taurus OX=9913 GN=AMELX PE=1 SV=2	1	hf1_10472_ebo_22_1_261219.ScanId;v=1;d1=9744.9744.3	controllerType=0 controllerNumber=1 scan=9744	25.564
46063:3	1	M.PLPPHPGHPGYINF.S			514.937	3	1542.8	1542.79	0	8	18	Non	141.72	141.72	141.72	2.12	1032	>sp|P02817|AMELX_BOVIN Amelogenin, X isoform OS=Bos taurus OX=9913 GN=AMELX PE=1 SV=2	1	hf1_10472_ebo_22_1_261219.ScanId;v=1;d1=34355.34355.3	controllerType=0 controllerNumber=1 scan=34355	73.528
18716:3	1	M.PLPPHPGHPGYINF.S			514.935	3	1542.79	1542.79	0	4.1	18	Non	242.53	237.26	237.26	2.91	1032	>sp|P02817|AMELX_BOVIN Amelogenin, X isoform OS=Bos taurus OX=9913 GN=AMELX PE=1 SV=2	1	hf1_10472_ebo_22_1_261219.ScanId;v=1;d1=14806.14806.3	controllerType=0 controllerNumber=1 scan=14806	34.3229
19030:3	1	M.PLPPHPGHPGYINF.S			514.936	3	1542.79	1542.79	0	5.1	18	Non	245.38	245.38	245.38	3.32	1032	>sp|P02817|AMELX_BOVIN Amelogenin, X isoform OS=Bos taurus OX=9913 GN=AMELX PE=1 SV=2	1	hf1_10472_ebo_22_1_261219.ScanId;v=1;d1=15009.15009.3	controllerType=0 controllerNumber=1 scan=15009	34.6725
20509:3	1	M.PLPPHPGHPGYINF.S			514.936	3	1542.79	1542.79	0	4.9	18	Non	274.02	274.02	274.02	3.32	1032	>sp|P02817|AMELX_BOVIN Amelogenin, X isoform OS=Bos taurus OX=9913 GN=AMELX PE=1 SV=2	1	hf1_10472_ebo_22_1_261219.ScanId;v=1;d1=16020.16020.3	controllerType=0 controllerNumber=1 scan=16020	36.4085
19719:2	1	M.PLPPHPGHPGYINF.S			771.901	2	1542.79	1542.79	0	5.9	18	Non	375.21	375.21	375.21	5.19	1032	>sp|P02817|AMELX_BOVIN Amelogenin, X isoform OS=Bos taurus OX=9913 GN=AMELX PE=1 SV=2	1	hf1_10472_ebo_22_1_261219.ScanId;v=1;d1=15488.15488.2	controllerType=0 controllerNumber=1 scan=15488	35.4952
20193:3	1	M.PLPPHPGHPGYINF.S			514.936	3	1542.79	1542.79	0	5.6	18	Non	375.36	359.48	359.48	4.19	1032	>sp|P02817|AMELX_BOVIN Amelogenin, X isoform OS=Bos taurus OX=9913 GN=AMELX PE=1 SV=2	1	hf1_10472_ebo_22_1_261219.ScanId;v=1;d1=15811.15811.3	controllerType=0 controllerNumber=1 scan=15811	36.0495
19897:3	1	M.PLPPHPGHPGYINF.S			514.936	3	1542.79	1542.79	0	5.5	18	Non	384.02	384.02	384.02	5.03	1032	>sp|P02817|AMELX_BOVIN Amelogenin, X isoform OS=Bos taurus OX=9913 GN=AMELX PE=1 SV=2	1	hf1_10472_ebo_22_1_261219.ScanId;v=1;d1=15611.15611.3	controllerType=0 controllerNumber=1 scan=15611	35.7079
19604:3	1	M.PLPPHPGHPGYINF.S			514.936	3	1542.79	1542.79	0	5.5	18	Non	384.3	384.3	384.3	5.03	1032	>sp|P02817|AMELX_BOVIN Amelogenin, X isoform OS=Bos taurus OX=9913 GN=AMELX PE=1 SV=2	1	hf1_10472_ebo_22_1_261219.ScanId;v=1;d1=15415.15415.3	controllerType=0 controllerNumber=1 scan=15415	35.3709
19330:3	1	M.PLPPHPGHPGYINF.S			514.935	3	1542.79	1542.79	0	4.1	18	Non	390.58	390.58	390.58	4.6	1032	>sp|P02817|AMELX_BOVIN Amelogenin, X isoform OS=Bos taurus OX=9913 GN=AMELX PE=1 SV=2	1	hf1_10472_ebo_22_1_261219.ScanId;v=1;d1=15211.15211.3	controllerType=0 controllerNumber=1 scan=15211	35.0174
20813:3	1	M.PLPPHPGHPGYIN[+0.984]F.S		N[+1]	515.263	3	1543.78	1543.77	0	4.1	18	Non	335.02	335.02	335.02	3.63	1032	>sp|P02817|AMELX_BOVIN Amelogenin, X isoform OS=Bos taurus OX=9913 GN=AMELX PE=1 SV=2	1	hf1_10472_ebo_22_1_261219.ScanId;v=1;d1=16224.16224.3	controllerType=0 controllerNumber=1 scan=16224	36.7622
20510:3	1	M.PLPPHPGHPGYIN[+0.984]F.S		N[+1]	515.263	3	1543.77	1543.77	0	3.5	18	Non	380.27	380.27	380.27	4.75	1032	>sp|P02817|AMELX_BOVIN Amelogenin, X isoform OS=Bos taurus OX=9913 GN=AMELX PE=1 SV=2	1	hf1_10472_ebo_22_1_261219.ScanId;v=1;d1=16020.16020.3	controllerType=0 controllerNumber=1 scan=16020	36.4085
19467:3	1	M.PLPPHPGHPGYINFS[+79.966].Y		S[+80]	570.601	3	1709.79	1709.78	0	2.6	18	Non	135.91	135.91	117.59	1.75	1032	>sp|P02817|AMELX_BOVIN Amelogenin, X isoform OS=Bos taurus OX=9913 GN=AMELX PE=1 SV=2	1	hf1_10472_ebo_22_1_261219.ScanId;v=1;d1=15313.15313.3	controllerType=0 controllerNumber=1 scan=15313	35.1906
20749:3	1	M.PLPPHPGHPGYINFS[+79.966].Y		S[+80]	570.602	3	1709.79	1709.78	0	4.5	18	Non	184.3	184.3	130.12	2.22	1032	>sp|P02817|AMELX_BOVIN Amelogenin, X isoform OS=Bos taurus OX=9913 GN=AMELX PE=1 SV=2	1	hf1_10472_ebo_22_1_261219.ScanId;v=1;d1=16181.16181.3	controllerType=0 controllerNumber=1 scan=16181	36.6865
19754:3	1	M.PLPPHPGHPGYINFS[+79.966].Y		S[+80]	570.602	3	1709.79	1709.78	0	4.5	18	Non	214.44	214.44	149.13	2.77	1032	>sp|P02817|AMELX_BOVIN Amelogenin, X isoform OS=Bos taurus OX=9913 GN=AMELX PE=1 SV=2	1	hf1_10472_ebo_22_1_261219.ScanId;v=1;d1=15514.15514.3	controllerType=0 controllerNumber=1 scan=15514	35.5408
20359:3	1	M.PLPPHPGHPGYINFS[+79.966].Y		S[+80]	570.602	3	1709.79	1709.78	0	5.6	18	Non	278.03	278.03	187.41	3.72	1032	>sp|P02817|AMELX_BOVIN Amelogenin, X isoform OS=Bos taurus OX=9913 GN=AMELX PE=1 SV=2	1	hf1_10472_ebo_22_1_261219.ScanId;v=1;d1=15922.15922.3	controllerType=0 controllerNumber=1 scan=15922	36.2387
19912:2	1	M.PLPPHPGHPGYINFS[+79.966].Y		S[+80]	855.4	2	1709.79	1709.78	0	5.4	18	Non	310.32	310.32	176.14	4.07	1032	>sp|P02817|AMELX_BOVIN Amelogenin, X isoform OS=Bos taurus OX=9913 GN=AMELX PE=1 SV=2	1	hf1_10472_ebo_22_1_261219.ScanId;v=1;d1=15620.15620.2	controllerType=0 controllerNumber=1 scan=15620	35.721
20052:3	1	M.PLPPHPGHPGYINFS[+79.966].Y		S[+80]	570.602	3	1709.79	1709.78	0	5	18	Non	318.21	318.21	185.95	4.06	1032	>sp|P02817|AMELX_BOVIN Amelogenin, X isoform OS=Bos taurus OX=9913 GN=AMELX PE=1 SV=2	1	hf1_10472_ebo_22_1_261219.ScanId;v=1;d1=15719.15719.3	controllerType=0 controllerNumber=1 scan=15719	35.8889
19502:2	1	M.PLPPHPGHPGYINFS[+79.966].Y		S[+80]	855.4	2	1709.79	1709.78	0	5.2	18	Non	409.33	409.33	258.79	6.24	1032	>sp|P02817|AMELX_BOVIN Amelogenin, X isoform OS=Bos taurus OX=9913 GN=AMELX PE=1 SV=2	1	hf1_10472_ebo_22_1_261219.ScanId;v=1;d1=15336.15336.2	controllerType=0 controllerNumber=1 scan=15336	35.2287
19844:2	1	M.PLPPHPGHPGYINFS[+79.966].Y		S[+80]	855.399	2	1709.79	1709.78	0	4.8	18	Non	416.17	416.17	238.2	5.58	1032	>sp|P02817|AMELX_BOVIN Amelogenin, X isoform OS=Bos taurus OX=9913 GN=AMELX PE=1 SV=2	1	hf1_10472_ebo_22_1_261219.ScanId;v=1;d1=15573.15573.2	controllerType=0 controllerNumber=1 scan=15573	35.6412
19620:2	1	M.PLPPHPGHPGYINFS[+79.966].Y		S[+80]	855.402	2	1709.8	1709.78	0	7.2	18	Non	535.7	535.7	245.55	6.06	1032	>sp|P02817|AMELX_BOVIN Amelogenin, X isoform OS=Bos taurus OX=9913 GN=AMELX PE=1 SV=2	1	hf1_10472_ebo_22_1_261219.ScanId;v=1;d1=15426.15426.4	controllerType=0 controllerNumber=1 scan=15426	35.3899
33154:3	1	M.PLPPHPGHPGYINFS[+79.966]YEVLTPL.K		S[+80]	842.418	3	2525.24	2525.23	0	5.1	18	Non	232.19	232.19	23.19	2.43	1032	>sp|P02817|AMELX_BOVIN Amelogenin, X isoform OS=Bos taurus OX=9913 GN=AMELX PE=1 SV=2	1	hf1_10472_ebo_22_1_261219.ScanId;v=1;d1=24599.24599.4	controllerType=0 controllerNumber=1 scan=24599	51.3861
32632:3	1	M.PLPPHPGHPGYINFS[+79.966]YEVLTPL.K		S[+80]	842.418	3	2525.24	2525.23	0	5.8	18	Non	338.27	338.27	91.12	4.48	1032	>sp|P02817|AMELX_BOVIN Amelogenin, X isoform OS=Bos taurus OX=9913 GN=AMELX PE=1 SV=2	1	hf1_10472_ebo_22_1_261219.ScanId;v=1;d1=24253.24253.3	controllerType=0 controllerNumber=1 scan=24253	50.7738
32921:3	1	M.PLPPHPGHPGYINFS[+79.966]YEVLTPL.K		S[+80]	842.419	3	2525.24	2525.23	0	6.9	18	Non	378.93	378.93	75.47	5.73	1032	>sp|P02817|AMELX_BOVIN Amelogenin, X isoform OS=Bos taurus OX=9913 GN=AMELX PE=1 SV=2	1	hf1_10472_ebo_22_1_261219.ScanId;v=1;d1=24448.24448.3	controllerType=0 controllerNumber=1 scan=24448	51.1198
26993:4	1	M.PLPPHPGHPGYINFSYEVLTPLK.W			644.099	4	2573.38	2573.36	0	7.8	18	NRagged	512.59	512.59	512.59	7.96	1032	>sp|P02817|AMELX_BOVIN Amelogenin, X isoform OS=Bos taurus OX=9913 GN=AMELX PE=1 SV=2	1	hf1_10472_ebo_22_1_261219.ScanId;v=1;d1=20414.20414.4	controllerType=0 controllerNumber=1 scan=20414	44.0431
29027:4	1	M.PLPPHPGHPGYINFS[+79.966]YEVLTPLK.W		S[+80]	664.087	4	2653.33	2653.32	0	2.1	18	NRagged	332.34	332.34	83.35	4.84	1032	>sp|P02817|AMELX_BOVIN Amelogenin, X isoform OS=Bos taurus OX=9913 GN=AMELX PE=1 SV=2	1	hf1_10472_ebo_22_1_261219.ScanId;v=1;d1=21820.21820.4	controllerType=0 controllerNumber=1 scan=21820	46.4955
28743:4	1	M.PLPPHPGHPGYINFS[+79.966]YEVLTPLK.W		S[+80]	664.09	4	2653.34	2653.32	0	6.4	18	NRagged	518.98	518.98	230.72	7.96	1032	>sp|P02817|AMELX_BOVIN Amelogenin, X isoform OS=Bos taurus OX=9913 GN=AMELX PE=1 SV=2	1	hf1_10472_ebo_22_1_261219.ScanId;v=1;d1=21623.21623.4	controllerType=0 controllerNumber=1 scan=21623	46.1517
28175:4	1	M.PLPPHPGHPGYINFS[+79.966]YEVLTPLK.W		S[+80]	664.089	4	2653.34	2653.32	0	5.4	18	NRagged	629.9	629.9	326.49	9.55	1032	>sp|P02817|AMELX_BOVIN Amelogenin, X isoform OS=Bos taurus OX=9913 GN=AMELX PE=1 SV=2	1	hf1_10472_ebo_22_1_261219.ScanId;v=1;d1=21234.21234.4	controllerType=0 controllerNumber=1 scan=21234	45.4677
28447:4	1	M.PLPPHPGHPGYINFS[+79.966]YEVLTPLK.W		S[+80]	664.09	4	2653.34	2653.32	0	6.3	18	NRagged	669.34	669.34	343.42	10.82	1032	>sp|P02817|AMELX_BOVIN Amelogenin, X isoform OS=Bos taurus OX=9913 GN=AMELX PE=1 SV=2	1	hf1_10472_ebo_22_1_261219.ScanId;v=1;d1=21425.21425.4	controllerType=0 controllerNumber=1 scan=21425	45.807
28130:3	1	M.PLPPHPGHPGYINFS[+79.966]YEVLTPLK.W		S[+80]	885.116	3	2653.33	2653.32	0	4.8	18	NRagged	823.94	823.94	369.55	13.55	1032	>sp|P02817|AMELX_BOVIN Amelogenin, X isoform OS=Bos taurus OX=9913 GN=AMELX PE=1 SV=2	1	hf1_10472_ebo_22_1_261219.ScanId;v=1;d1=21201.21201.3	controllerType=0 controllerNumber=1 scan=21201	45.4077
28407:3	1	M.PLPPHPGHPGYINFS[+79.966]YEVLTPLK.W		S[+80]	885.117	3	2653.34	2653.32	0	6.2	18	NRagged	904.92	904.92	389.25	15.82	1032	>sp|P02817|AMELX_BOVIN Amelogenin, X isoform OS=Bos taurus OX=9913 GN=AMELX PE=1 SV=2	1	hf1_10472_ebo_22_1_261219.ScanId;v=1;d1=21399.21399.3	controllerType=0 controllerNumber=1 scan=21399	45.7614
27718:4	1	M.PLPPHPGHP[+15.995]GYINFS[+79.966]YEVLTPLK.W		P[+16], S[+80]	668.089	4	2669.33	2669.32	0	6.3	18	NRagged	308.62	308.62	0	5.85	1032	>sp|P02817|AMELX_BOVIN Amelogenin, X isoform OS=Bos taurus OX=9913 GN=AMELX PE=1 SV=2	1	hf1_10472_ebo_22_1_261219.ScanId;v=1;d1=20911.20911.4	controllerType=0 controllerNumber=1 scan=20911	44.9065
29311:4	1	M.PLPPHPGHPGYIN[+0.984]FS[+79.966]YEVLTPLK.W		N[+1], S[+80]	664.337	4	2654.32	2654.31	0	7.1	18	NRagged	324.3	324.3	84.06	6.25	1032	>sp|P02817|AMELX_BOVIN Amelogenin, X isoform OS=Bos taurus OX=9913 GN=AMELX PE=1 SV=2	1	hf1_10472_ebo_22_1_261219.ScanId;v=1;d1=22015.22015.4	controllerType=0 controllerNumber=1 scan=22015	46.837
29028:4	1	M.PLPPHPGHPGYIN[+0.984]FS[+79.966]YEVLTPLK.W		N[+1], S[+80]	664.337	4	2654.33	2654.31	0	8.3	18	NRagged	408.54	408.54	166.48	6.42	1032	>sp|P02817|AMELX_BOVIN Amelogenin, X isoform OS=Bos taurus OX=9913 GN=AMELX PE=1 SV=2	1	hf1_10472_ebo_22_1_261219.ScanId;v=1;d1=21820.21820.4	controllerType=0 controllerNumber=1 scan=21820	46.4955
29105:3	1	M.PLPPHPGHPGYIN[+0.984]FS[+79.966]YEVLTPLK.W		N[+1], S[+80]	885.446	3	2654.32	2654.31	0	7	18	NRagged	721.34	721.34	331.25	11.82	1032	>sp|P02817|AMELX_BOVIN Amelogenin, X isoform OS=Bos taurus OX=9913 GN=AMELX PE=1 SV=2	1	hf1_10472_ebo_22_1_261219.ScanId;v=1;d1=21875.21875.3	controllerType=0 controllerNumber=1 scan=21875	46.5913
34168:4	1	M.PLPPHPGHPGYINFS[+79.966]YEVLTPLKW.Y		S[+80]	710.612	4	2839.43	2839.4	0	9.2	18	Non	145.97	145.97	5.83	2.17	1032	>sp|P02817|AMELX_BOVIN Amelogenin, X isoform OS=Bos taurus OX=9913 GN=AMELX PE=1 SV=2	1	hf1_10472_ebo_22_1_261219.ScanId;v=1;d1=25279.25279.6	controllerType=0 controllerNumber=1 scan=25279	52.6048
34358:4	1	M.PLPPHPGHP[+31.990]GY[+31.990]INFSY[+15.995]EVLTPLKW.Y		P[+32], Y[+16][+32]	710.609	4	2839.41	2839.41	0	1.6	18	Non	160.37	160.37	2.7	2.25	1032	>sp|P02817|AMELX_BOVIN Amelogenin, X isoform OS=Bos taurus OX=9913 GN=AMELX PE=1 SV=2	1	hf1_10472_ebo_22_1_261219.ScanId;v=1;d1=25405.25405.4	controllerType=0 controllerNumber=1 scan=25405	52.8285
35607:3	1	M.PLPPHPGHPGYINFS[+79.966]YEVLTPLKWY.Q		S[+80]	1001.5	3	3002.49	3002.46	0	9.2	18	Non	201.76	201.76	31.15	3.55	1032	>sp|P02817|AMELX_BOVIN Amelogenin, X isoform OS=Bos taurus OX=9913 GN=AMELX PE=1 SV=2	1	hf1_10472_ebo_22_1_261219.ScanId;v=1;d1=26252.26252.3	controllerType=0 controllerNumber=1 scan=26252	54.3413
35592:4	1	M.PLPPHPGHP[+31.990]GYINF[+31.990]SY[+15.995]EVLTPLKWY.Q		F[+32], P[+32], Y[+16]	751.378	4	3002.49	3002.47	0	5.5	18	Non	190.61	190.61	12.14	3.75	1032	>sp|P02817|AMELX_BOVIN Amelogenin, X isoform OS=Bos taurus OX=9913 GN=AMELX PE=1 SV=2	1	hf1_10472_ebo_22_1_261219.ScanId;v=1;d1=26241.26241.4	controllerType=0 controllerNumber=1 scan=26241	54.3218
35294:4	1	M.PLPPHPGHP[+31.990]GYINF[+31.990]SY[+15.995]EVLTPLKWY.Q		F[+32], P[+32], Y[+16]	751.376	4	3002.48	3002.47	0	3.4	18	Non	234.09	234.09	8.08	3.63	1032	>sp|P02817|AMELX_BOVIN Amelogenin, X isoform OS=Bos taurus OX=9913 GN=AMELX PE=1 SV=2	1	hf1_10472_ebo_22_1_261219.ScanId;v=1;d1=26043.26043.4	controllerType=0 controllerNumber=1 scan=26043	53.9683
33670:4	1	M.PLPPHPGHPGYINFSYEVLTPLKWY[+31.990]QS.M		Y[+32]	793.153	4	3169.59	3169.58	0	3.1	18	Non	37.3	37.3	0	1.35	1032	>sp|P02817|AMELX_BOVIN Amelogenin, X isoform OS=Bos taurus OX=9913 GN=AMELX PE=1 SV=2	1	hf1_10472_ebo_22_1_261219.ScanId;v=1;d1=24944.24944.4	controllerType=0 controllerNumber=1 scan=24944	52.0006
34009:4	1	M.PLPPHPGHPGYINFS[+79.966]YEVLTPLKWYQSM[+15.995]IR.H		M[+16], S[+80]	909.206	4	3633.8	3633.78	0	6.9	18	NRagged	371.98	371.98	10.76	8.09	1032	>sp|P02817|AMELX_BOVIN Amelogenin, X isoform OS=Bos taurus OX=9913 GN=AMELX PE=1 SV=2	1	hf1_10472_ebo_22_1_261219.ScanId;v=1;d1=25172.25172.4	controllerType=0 controllerNumber=1 scan=25172	52.4111
33001:4	1	M.PLPPHPGHPGYINFS[+79.966]YEVLTPLKWYQSM[+15.995]IRHPYP.S		M[+16], S[+80]	1032.51	4	4127.02	4128	-1	5.5	18	Non	141.05	141.05	3.71	2.28	1032	>sp|P02817|AMELX_BOVIN Amelogenin, X isoform OS=Bos taurus OX=9913 GN=AMELX PE=1 SV=2	1	hf1_10472_ebo_22_1_261219.ScanId;v=1;d1=24501.24501.4	controllerType=0 controllerNumber=1 scan=24501	51.2133
37229:5	1	M.PLPPHPGHP[+31.990]GY[+31.990]INFSY[+15.995]EVLTPLKWYQSMIRHPYP.S		P[+32], Y[+16][+32]	823.417	5	4113.06	4112.02	1	9	18	Non	84.83	84.83	0.32	2.27	1032	>sp|P02817|AMELX_BOVIN Amelogenin, X isoform OS=Bos taurus OX=9913 GN=AMELX PE=1 SV=2	1	hf1_10472_ebo_22_1_261219.ScanId;v=1;d1=27305.27305.5	controllerType=0 controllerNumber=1 scan=27305	56.2175
32991:6	1	M.PLP[+31.990]P[+31.990]HPGHPGYINFSY[+15.995]EVLTPLKWY[+15.995]QSMIRHPYP.S		P[+32]*2, Y[+16]*2	688.844	6	4128.03	4128.01	0	4.5	18	Non	41.48	41.48	0	2.14	1032	>sp|P02817|AMELX_BOVIN Amelogenin, X isoform OS=Bos taurus OX=9913 GN=AMELX PE=1 SV=2	1	hf1_10472_ebo_22_1_261219.ScanId;v=1;d1=24494.24494.6	controllerType=0 controllerNumber=1 scan=24494	51.1999
32931:5	1	M.PLPPHPGHP[+15.995]GY[+31.990]INF[+31.990]SYEVLTPLKWYQSM[+15.995]IRHPYP.S		F[+32], M[+16], P[+16], Y[+32]	826.41	5	4128.02	4128.01	0	3	18	Non	321.49	321.49	0	5.15	1032	>sp|P02817|AMELX_BOVIN Amelogenin, X isoform OS=Bos taurus OX=9913 GN=AMELX PE=1 SV=2	1	hf1_10472_ebo_22_1_261219.ScanId;v=1;d1=24454.24454.5	controllerType=0 controllerNumber=1 scan=24454	51.1289
02569:2	1	P.LPPHPGH.P			377.704	2	754.402	754.399	0	2.9	19	Non	376.2	329.28	329.28	3.34	1032	>sp|P02817|AMELX_BOVIN Amelogenin, X isoform OS=Bos taurus OX=9913 GN=AMELX PE=1 SV=2	1	hf1_10472_ebo_22_1_261219.ScanId;v=1;d1=3799.3799.2	controllerType=0 controllerNumber=1 scan=3799	15.1981
02227:2	1	P.LPPHPGH.P			377.705	2	754.402	754.399	0	3.2	19	Non	419.3	354.62	354.62	3.69	1032	>sp|P02817|AMELX_BOVIN Amelogenin, X isoform OS=Bos taurus OX=9913 GN=AMELX PE=1 SV=2	1	hf1_10472_ebo_22_1_261219.ScanId;v=1;d1=3560.3560.2	controllerType=0 controllerNumber=1 scan=3560	14.7798
04460:2	1	P.LPPHPGHP.G			426.232	2	851.456	851.452	0	4.8	19	Non	238.15	55	55	2.11	1032	>sp|P02817|AMELX_BOVIN Amelogenin, X isoform OS=Bos taurus OX=9913 GN=AMELX PE=1 SV=2	1	hf1_10472_ebo_22_1_261219.ScanId;v=1;d1=5130.5130.3	controllerType=0 controllerNumber=1 scan=5130	17.5101
04216:2	1	P.LPPHPGHP.G			426.232	2	851.457	851.452	0	5.7	19	Non	382.45	96.9	96.9	2.36	1032	>sp|P02817|AMELX_BOVIN Amelogenin, X isoform OS=Bos taurus OX=9913 GN=AMELX PE=1 SV=2	1	hf1_10472_ebo_22_1_261219.ScanId;v=1;d1=4955.4955.4	controllerType=0 controllerNumber=1 scan=4955	17.1994
03537:2	1	P.LPPHPGHP.G			426.231	2	851.456	851.452	0	4.1	19	Non	431.65	149.85	149.85	2.45	1032	>sp|P02817|AMELX_BOVIN Amelogenin, X isoform OS=Bos taurus OX=9913 GN=AMELX PE=1 SV=2	1	hf1_10472_ebo_22_1_261219.ScanId;v=1;d1=4471.4471.2	controllerType=0 controllerNumber=1 scan=4471	16.3548
04088:2	1	P.LPPHPGHP.G			426.232	2	851.457	851.452	0	5.2	19	Non	445.39	135.03	135.03	2.81	1032	>sp|P02817|AMELX_BOVIN Amelogenin, X isoform OS=Bos taurus OX=9913 GN=AMELX PE=1 SV=2	1	hf1_10472_ebo_22_1_261219.ScanId;v=1;d1=4864.4864.2	controllerType=0 controllerNumber=1 scan=4864	17.0414
03817:2	1	P.LPPHPGHP.G			426.231	2	851.456	851.452	0	4	19	Non	520.69	215.48	215.48	4.2	1032	>sp|P02817|AMELX_BOVIN Amelogenin, X isoform OS=Bos taurus OX=9913 GN=AMELX PE=1 SV=2	1	hf1_10472_ebo_22_1_261219.ScanId;v=1;d1=4668.4668.2	controllerType=0 controllerNumber=1 scan=4668	16.6977
03647:2	1	P.LPPHPGHPG.Y			454.743	2	908.479	908.474	0	5.4	19	Non	332	332	332	3.64	1032	>sp|P02817|AMELX_BOVIN Amelogenin, X isoform OS=Bos taurus OX=9913 GN=AMELX PE=1 SV=2	1	hf1_10472_ebo_22_1_261219.ScanId;v=1;d1=4548.4548.3	controllerType=0 controllerNumber=1 scan=4548	16.4865
03769:2	1	P.LPPHPGHPG.Y			454.743	2	908.478	908.474	0	4.9	19	Non	453.22	370.99	370.99	4.69	1032	>sp|P02817|AMELX_BOVIN Amelogenin, X isoform OS=Bos taurus OX=9913 GN=AMELX PE=1 SV=2	1	hf1_10472_ebo_22_1_261219.ScanId;v=1;d1=4632.4632.2	controllerType=0 controllerNumber=1 scan=4632	16.6333
03478:2	1	P.LPPHPGHPG.Y			454.743	2	908.478	908.474	0	4.7	19	Non	506.37	412.56	412.56	5.71	1032	>sp|P02817|AMELX_BOVIN Amelogenin, X isoform OS=Bos taurus OX=9913 GN=AMELX PE=1 SV=2	1	hf1_10472_ebo_22_1_261219.ScanId;v=1;d1=4427.4427.2	controllerType=0 controllerNumber=1 scan=4427	16.2786
03184:2	1	P.LPPHPGHPG.Y			454.743	2	908.478	908.474	0	5	19	Non	523.18	459.63	459.63	5.17	1032	>sp|P02817|AMELX_BOVIN Amelogenin, X isoform OS=Bos taurus OX=9913 GN=AMELX PE=1 SV=2	1	hf1_10472_ebo_22_1_261219.ScanId;v=1;d1=4216.4216.4	controllerType=0 controllerNumber=1 scan=4216	15.9134
07377:2	1	P.LPPHPGHPGY.I			536.275	2	1071.54	1071.54	0	6.3	19	Non	409.38	365.68	365.68	5.46	1032	>sp|P02817|AMELX_BOVIN Amelogenin, X isoform OS=Bos taurus OX=9913 GN=AMELX PE=1 SV=2	1	hf1_10472_ebo_22_1_261219.ScanId;v=1;d1=7127.7127.2	controllerType=0 controllerNumber=1 scan=7127	20.9997
06182:2	1	P.LPPHPGHPGY.I			536.275	2	1071.54	1071.54	0	5.2	19	Non	446.12	427.61	427.61	5.51	1032	>sp|P02817|AMELX_BOVIN Amelogenin, X isoform OS=Bos taurus OX=9913 GN=AMELX PE=1 SV=2	1	hf1_10472_ebo_22_1_261219.ScanId;v=1;d1=6316.6316.2	controllerType=0 controllerNumber=1 scan=6316	19.5869
07086:2	1	P.LPPHPGHPGY.I			536.275	2	1071.54	1071.54	0	5.9	19	Non	506.42	453.75	453.75	6.16	1032	>sp|P02817|AMELX_BOVIN Amelogenin, X isoform OS=Bos taurus OX=9913 GN=AMELX PE=1 SV=2	1	hf1_10472_ebo_22_1_261219.ScanId;v=1;d1=6928.6928.2	controllerType=0 controllerNumber=1 scan=6928	20.6535
06800:2	1	P.LPPHPGHPGY.I			536.275	2	1071.54	1071.54	0	5.5	19	Non	571.17	457.53	457.53	7.01	1032	>sp|P02817|AMELX_BOVIN Amelogenin, X isoform OS=Bos taurus OX=9913 GN=AMELX PE=1 SV=2	1	hf1_10472_ebo_22_1_261219.ScanId;v=1;d1=6730.6730.2	controllerType=0 controllerNumber=1 scan=6730	20.307
06495:2	1	P.LPPHPGHPGY.I			536.275	2	1071.54	1071.54	0	5.9	19	Non	575.56	492.7	492.7	7.01	1032	>sp|P02817|AMELX_BOVIN Amelogenin, X isoform OS=Bos taurus OX=9913 GN=AMELX PE=1 SV=2	1	hf1_10472_ebo_22_1_261219.ScanId;v=1;d1=6525.6525.2	controllerType=0 controllerNumber=1 scan=6525	19.9512
09738:2	1	P.LPPHP[+31.990]GHPGY.I		P[+32]	552.271	2	1103.53	1103.53	0	7.2	19	Non	260.23	260.23	20	3.58	1032	>sp|P02817|AMELX_BOVIN Amelogenin, X isoform OS=Bos taurus OX=9913 GN=AMELX PE=1 SV=2	1	hf1_10472_ebo_22_1_261219.ScanId;v=1;d1=8730.8730.2	controllerType=0 controllerNumber=1 scan=8730	23.7928
10156:2	1	P.LPPHP[+31.990]GHPGY.I		P[+32]	552.269	2	1103.53	1103.53	0	3.2	19	Non	302.32	302.32	20	3.23	1032	>sp|P02817|AMELX_BOVIN Amelogenin, X isoform OS=Bos taurus OX=9913 GN=AMELX PE=1 SV=2	1	hf1_10472_ebo_22_1_261219.ScanId;v=1;d1=9007.9007.2	controllerType=0 controllerNumber=1 scan=9007	24.2759
11823:3	1	P.LPPHPGHPGYI.N			395.548	3	1184.63	1184.62	0	6.2	19	Non	186.93	186.93	186.93	2.61	1032	>sp|P02817|AMELX_BOVIN Amelogenin, X isoform OS=Bos taurus OX=9913 GN=AMELX PE=1 SV=2	1	hf1_10472_ebo_22_1_261219.ScanId;v=1;d1=10142.10142.3	controllerType=0 controllerNumber=1 scan=10142	26.2542
11882:3	1	P.LPPHPGHPGYI.N			395.547	3	1184.63	1184.62	0	5.6	19	Non	263.31	263.31	263.31	3.56	1032	>sp|P02817|AMELX_BOVIN Amelogenin, X isoform OS=Bos taurus OX=9913 GN=AMELX PE=1 SV=2	1	hf1_10472_ebo_22_1_261219.ScanId;v=1;d1=10181.10181.3	controllerType=0 controllerNumber=1 scan=10181	26.3223
09345:2	1	P.LPPHPGHPGYIN.F			649.84	2	1298.67	1298.66	0	5.9	19	Non	213.17	213.17	213.17	2.83	1032	>sp|P02817|AMELX_BOVIN Amelogenin, X isoform OS=Bos taurus OX=9913 GN=AMELX PE=1 SV=2	1	hf1_10472_ebo_22_1_261219.ScanId;v=1;d1=8470.8470.4	controllerType=0 controllerNumber=1 scan=8470	23.3404
08950:3	1	P.LPPHPGHPGYIN.F			433.562	3	1298.67	1298.66	0	5.5	19	Non	302.75	302.75	302.75	3.89	1032	>sp|P02817|AMELX_BOVIN Amelogenin, X isoform OS=Bos taurus OX=9913 GN=AMELX PE=1 SV=2	1	hf1_10472_ebo_22_1_261219.ScanId;v=1;d1=8208.8208.3	controllerType=0 controllerNumber=1 scan=8208	22.8808
09836:3	1	P.LPPHPGHPGYIN.F			433.562	3	1298.67	1298.66	0	5.5	19	Non	308.11	308.11	308.11	3.89	1032	>sp|P02817|AMELX_BOVIN Amelogenin, X isoform OS=Bos taurus OX=9913 GN=AMELX PE=1 SV=2	1	hf1_10472_ebo_22_1_261219.ScanId;v=1;d1=8798.8798.3	controllerType=0 controllerNumber=1 scan=8798	23.9146
10141:3	1	P.LPPHPGHPGYIN.F			433.562	3	1298.67	1298.66	0	4.8	19	Non	336.95	336.95	336.95	4.22	1032	>sp|P02817|AMELX_BOVIN Amelogenin, X isoform OS=Bos taurus OX=9913 GN=AMELX PE=1 SV=2	1	hf1_10472_ebo_22_1_261219.ScanId;v=1;d1=8998.8998.3	controllerType=0 controllerNumber=1 scan=8998	24.2596
09243:3	1	P.LPPHPGHPGYIN.F			433.563	3	1298.67	1298.66	0	7	19	Non	346.98	346.98	346.98	4.71	1032	>sp|P02817|AMELX_BOVIN Amelogenin, X isoform OS=Bos taurus OX=9913 GN=AMELX PE=1 SV=2	1	hf1_10472_ebo_22_1_261219.ScanId;v=1;d1=8402.8402.3	controllerType=0 controllerNumber=1 scan=8402	23.2219
09544:3	1	P.LPPHPGHPGYIN.F			433.562	3	1298.67	1298.66	0	6.9	19	Non	404.03	404.03	404.03	5.68	1032	>sp|P02817|AMELX_BOVIN Amelogenin, X isoform OS=Bos taurus OX=9913 GN=AMELX PE=1 SV=2	1	hf1_10472_ebo_22_1_261219.ScanId;v=1;d1=8600.8600.3	controllerType=0 controllerNumber=1 scan=8600	23.5691
09953:2	1	P.LPPHPGHPGYIN.F			649.839	2	1298.67	1298.66	0	5.6	19	Non	415.02	362.34	362.34	6.07	1032	>sp|P02817|AMELX_BOVIN Amelogenin, X isoform OS=Bos taurus OX=9913 GN=AMELX PE=1 SV=2	1	hf1_10472_ebo_22_1_261219.ScanId;v=1;d1=8875.8875.2	controllerType=0 controllerNumber=1 scan=8875	24.0491
[truncated: 1,674 more rows]

## Sheet: Proteins
Protein Rank	Description	|Log Prob|	Best |Log Prob|	Best score	Total Intensity	# of spectra	# of unique peptides	# of mod peptides	Coverage %	# AA's in protein	Protein DB number
[truncated: 4 more rows]
