# Supplementary material for: A Peptidomics Method for Assessing Sex from Modern and Ancient Bovine Tooth Enamel.
Source: Research Square preprint supplement (doi:10.21203/rs.3.rs-3766361/v1), 2024-01-29
Supplement: Supplementary file 1 [file 0976fccd8c3d2e4538d0e791.pdf]

## Supplementary Information

Kotli et al. *A Peptidomics Method for Assessing Sex from Modern and Ancient Bovine Tooth Enamel.*

SI 1: Proteomics

PrintMapR plots- AmelX

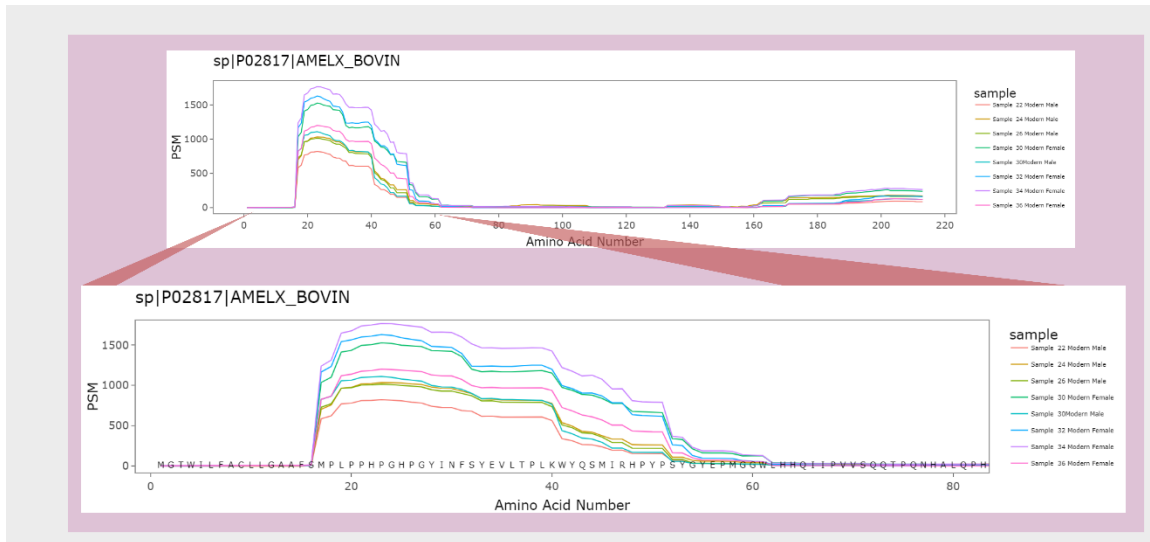

Figure 1. Spectral counting-based coverage of AmelX protein in peptidomics data from eight modern samples - four males and four females, y-axis presents the number of ID spectra per amino acid position in the protein in linear scale. Note, there are not difference between male and female samples in this region.

PSM coverage of AmelX and AmelY. Including examples after data filter were applied.  
More info- excel raw data files.

Sample 22  
- Male

Byonic PSMs recovery (raw) data before filters on bovine amelogenin peptides.

| Prot. Rank | Protein Name                                                                                   | Log Prob | Best  Log Prob | Best Score | # Spectra | # Uniq. Peps. | # Mod Peps. | % Cov. | # AAs | Intensity |
|------------|------------------------------------------------------------------------------------------------|----------|----------------|------------|-----------|---------------|-------------|--------|-------|-----------|
| 1   1      | >sp P02817 AMELX_BOVIN Amelogenin, X isoform OS=Bos taurus OX=9913 GN=AMELX PE=1 SV=2          | 3416.45  | 23.54          | 1341.9     | 2529      | 1032          | 834         | 98.6   | 213   | 2.44E+10  |
| 2   2      | >sp Q99004 AMELY_BOVIN Amelogenin, Y isoform OS=Bos taurus OX=9913 GN=AMELY PE=2 SV=1          | 579      | 19.31          | 1136.6     | 310       | 197           | 157         | 88     | 192   | 1.35E+09  |
| 3   3      | >Reverse >sp P02817 AMELX_BOVIN Amelogenin, X isoform OS=Bos taurus OX=9913 GN=AMELX PE=1 SV=2 | 0.01     | 2.08           | 332        | 12        | 10            | 6           | 38     | 213   | 4.26E+07  |
| 4   4      | >Reverse >sp Q99004 AMELY_BOVIN Amelogenin, Y isoform OS=Bos taurus OX=9913 GN=AMELY PE=2 SV=1 | 0.01     | 1.78           | 165.1      | 2         | 2             | 2           | 9.9    | 192   | 3.63E+06  |

AmelX

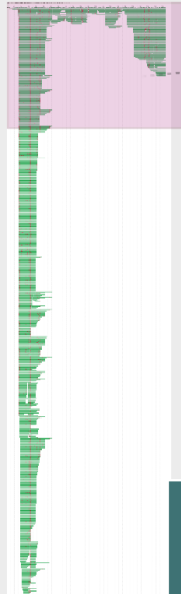

AmelX coverage - close up

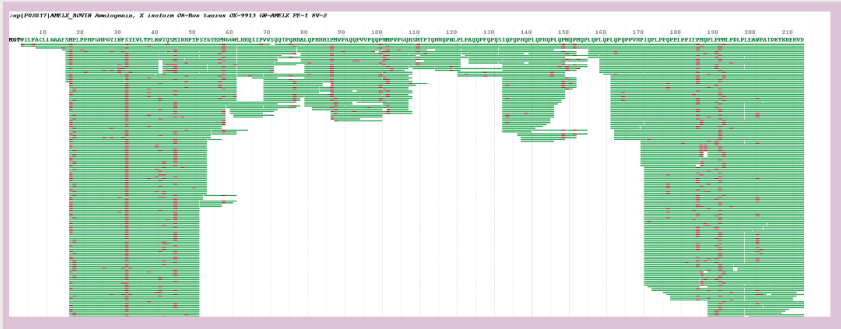

Amely coverage

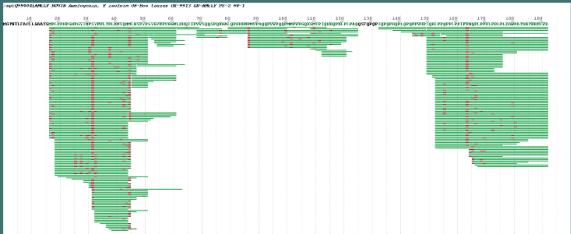

After filter (See method section)

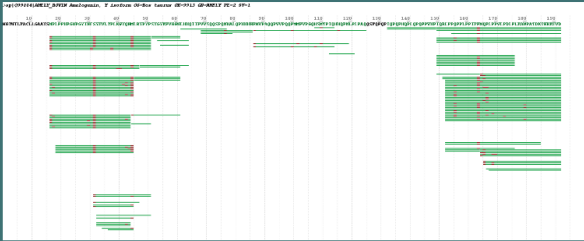

Sample 24  
- Male

AmelX

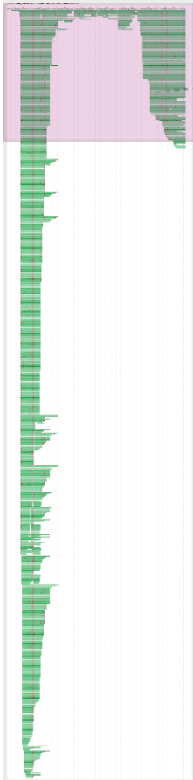

Byonic PSMs recovery (raw) data before filters on bovine amelogenin peptides.

| Prot. Rank | Protein Name                                                                                   | Log Prob | Best [Log Prob] | Best Score | # Spectra | # Uniq. Peps. | # Mod Peps. | % Cov. | # AAs | Intensity |
|------------|------------------------------------------------------------------------------------------------|----------|-----------------|------------|-----------|---------------|-------------|--------|-------|-----------|
| 1   1      | >sp P02817 AMELX_BOVIN Amelogenin, X isoform OS=Bos taurus OX=9913 GN=AMELX PE=1 SV=2          | 3896.52  | 20.57           | 1189       | 3038      | 1304          | 1141        | 98.6   | 213   | 4.96E+10  |
| 2   2      | >sp Q99004 AMELY_BOVIN Amelogenin, Y isoform OS=Bos taurus OX=9913 GN=AMELY PE=2 SV=1          | 745.36   | 22.52           | 1383.1     | 426       | 302           | 274         | 99.5   | 192   | 3.81E+09  |
| 3   3      | >Reverse >sp Q99004 AMELY_BOVIN Amelogenin, Y isoform OS=Bos taurus OX=9913 GN=AMELY PE=2 SV=1 | 0.01     | 2.25            | 93.2       | 6         | 6             | 6           | 46.9   | 192   | 5.36E+07  |
| 4   4      | >Reverse >sp P02817 AMELX_BOVIN Amelogenin, X isoform OS=Bos taurus OX=9913 GN=AMELX PE=1 SV=2 | 0.01     | 1.94            | 409.5      | 14        | 12            | 11          | 42.7   | 213   | 5.69E+07  |

AmelX coverage      AmelX coverage - close up

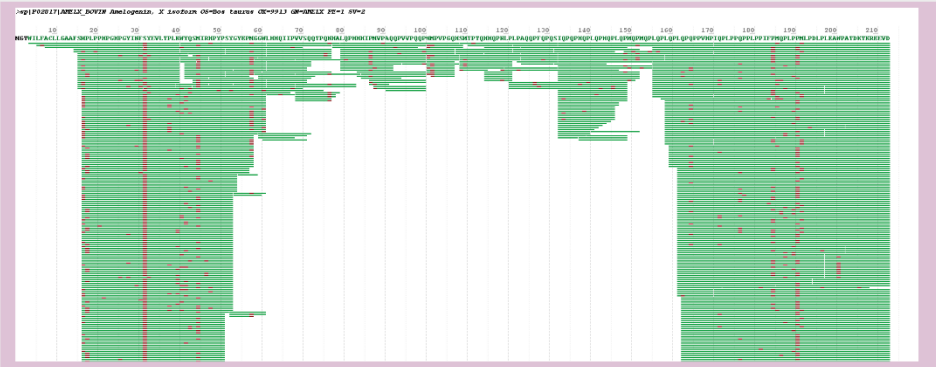

AmelY coverage

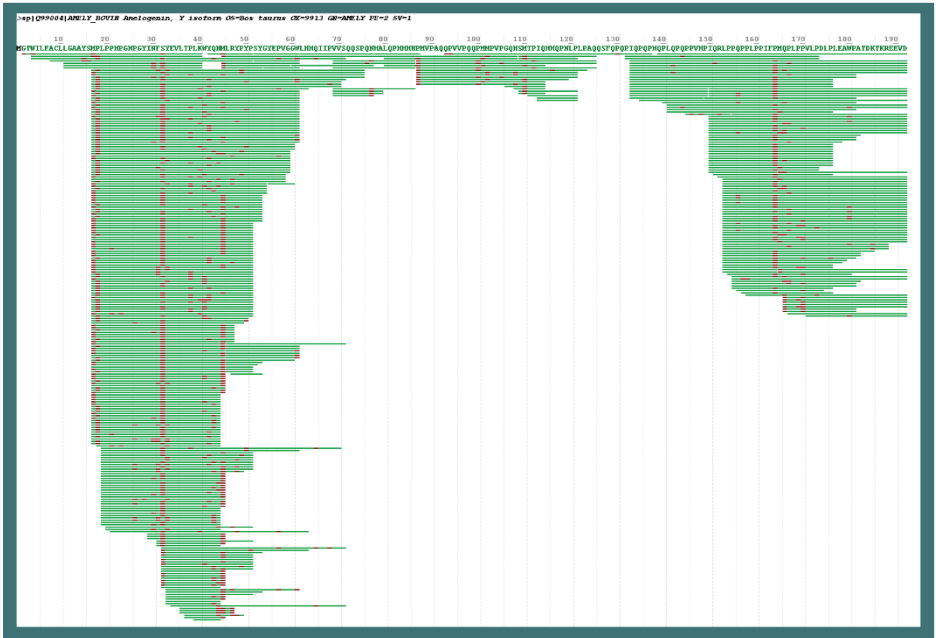

Sample 26  
- Male

AmelX

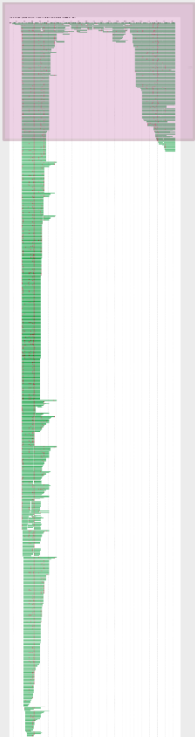

Byonic PSMs recovery (raw) data before filters on bovine amelogenin peptides.

| Prot. Rank | Protein Name                                                                                   | Log Prob | Best [Log Prob] | Best Score | # Spectra | # Uniq. Peps. | # Mod Peps. | % Cov. | # AAs | Intensity |
|------------|------------------------------------------------------------------------------------------------|----------|-----------------|------------|-----------|---------------|-------------|--------|-------|-----------|
| 1   1      | >sp P02817 AMELX_BOVIN Amelogenin, X isoform OS=Bos taurus OX=9913 GN=AMELX PE=1 SV=2          | 3874.41  | 26.56           | 1363       | 2818      | 1206          | 970         | 98.6   | 213   | 3.42E+10  |
| 2   2      | >sp Q99004 AMELY_BOVIN Amelogenin, Y isoform OS=Bos taurus OX=9913 GN=AMELY PE=2 SV=1          | 686.31   | 19.42           | 1111.4     | 366       | 235           | 192         | 94.3   | 192   | 2.48E+09  |
| 3   3      | >Reverse >sp P02817 AMELX_BOVIN Amelogenin, X isoform OS=Bos taurus OX=9913 GN=AMELX PE=1 SV=2 | 0.01     | 2.02            | 347        | 12        | 11            | 6           | 45.5   | 213   | 9.38E+07  |
| 4   4      | >Reverse >sp Q99004 AMELY_BOVIN Amelogenin, Y isoform OS=Bos taurus OX=9913 GN=AMELY PE=2 SV=1 | 0.01     | 1.87            | 84.7       | 3         | 3             | 3           | 40.6   | 192   | 6.41E+06  |

AmelX coverage - close up

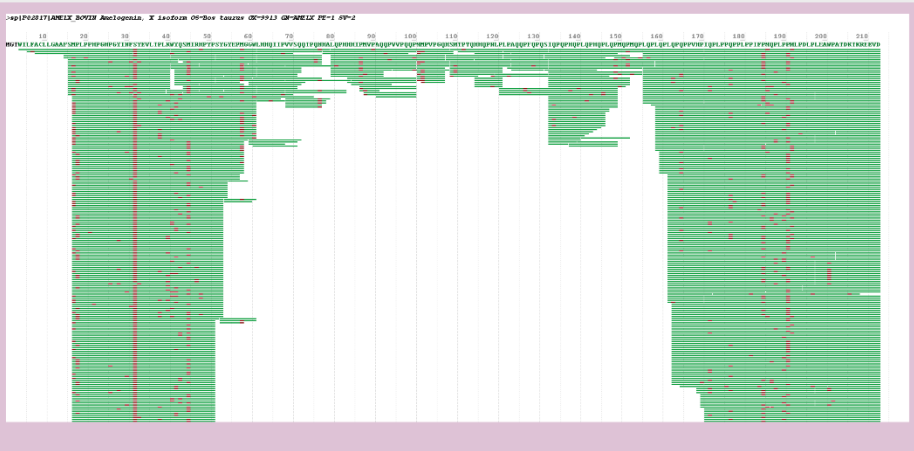

Amely coverage

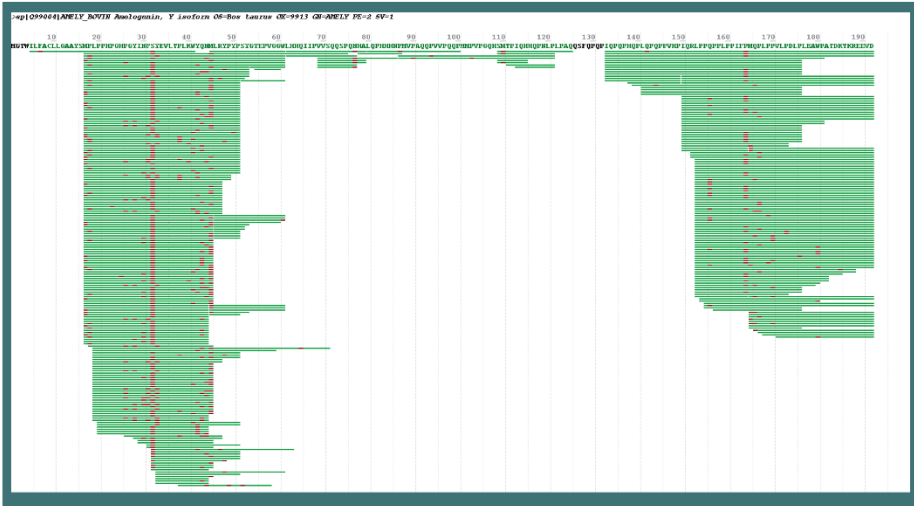

Sample 28  
- Male

AmelX

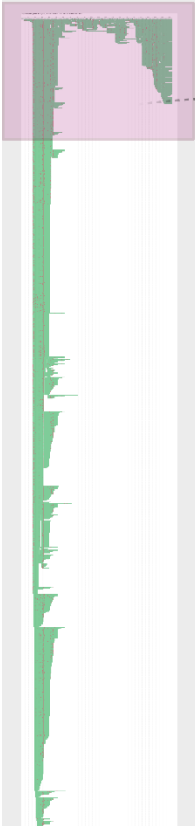

Byonic PSMs recovery (raw) data before filters on bovine amelogenin peptides.

| Prot. Rank | Protein Name                                                                                   | Log Prob | Best  Log Prob | Best Score | # Spectra | # Uniq. Peps. | # Mod Peps. | % Cov. | # AAs | Intensity |
|------------|------------------------------------------------------------------------------------------------|----------|----------------|------------|-----------|---------------|-------------|--------|-------|-----------|
| 1   1      | >sp P02817 AMELX_BOVIN Amelogenin, X isoform OS=Bos taurus OX=9913 GN=AMELX PE=1 SV=2          | 3661.01  | 24.69          | 1300.4     | 3458      | 1278          | 1025        | 100    | 213   | 3.89E+10  |
| 2   2      | >sp Q99004 AMELY_BOVIN Amelogenin, Y isoform OS=Bos taurus OX=9913 GN=AMELY PE=2 SV=1          | 557.05   | 19.85          | 1068.9     | 389       | 272           | 232         | 96.9   | 192   | 2.48E+09  |
| 3   3      | >Reverse >sp P02817 AMELX_BOVIN Amelogenin, X isoform OS=Bos taurus OX=9913 GN=AMELX PE=1 SV=2 | 0.01     | 1.83           | 329.5      | 72        | 68            | 50          | 92.5   | 213   | 3.73E+08  |
| 4   4      | >Reverse >sp Q99004 AMELY_BOVIN Amelogenin, Y isoform OS=Bos taurus OX=9913 GN=AMELY PE=2 SV=1 | 0.01     | 1.95           | 259.1      | 35        | 30            | 27          | 93.2   | 192   | 3.83E+08  |

AmelX coverage - close up

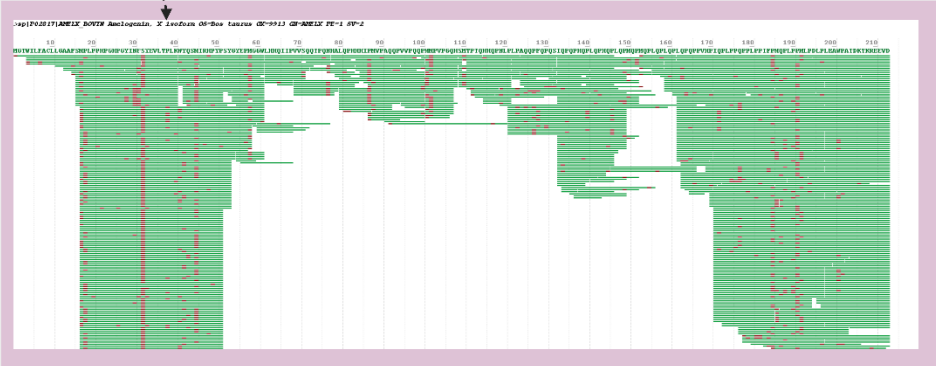

Amely coverage

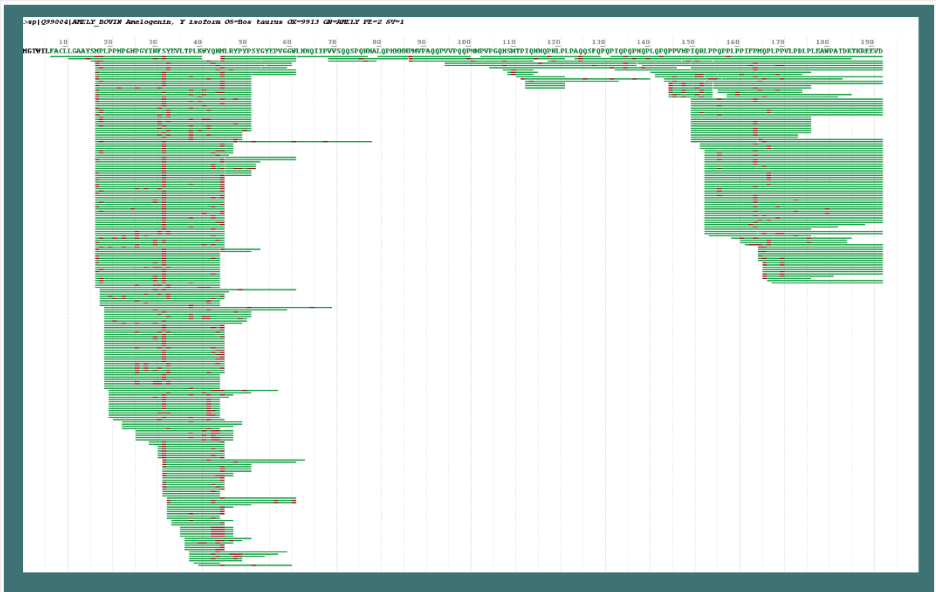

Sample 30  
- Female

AmelX

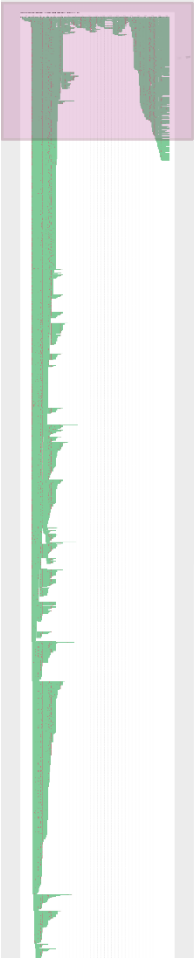

Byonic PSMs recovery (raw) data before filters on bovine amelogenin peptides.

| Prot. Rank | Protein Name                                                                                   | Log Prob | Best [Log Prob] | Best Score | # Spectra | # Uniq. Peps. | # Mod Peps. | % Cov. | # AAs | Intensity |
|------------|------------------------------------------------------------------------------------------------|----------|-----------------|------------|-----------|---------------|-------------|--------|-------|-----------|
| 1   1      | >sp P02817 AMELX_BOVIN Amelogenin, X isoform OS=Bos taurus OX=9913 GN=AMELX PE=1 SV=2          | 5090.04  | 21.47           | 1308.4     | 4163      | 1703          | 1519        | 98.6   | 213   | 1.24E+11  |
| 2   2      | >sp Q99004 AMELY_BOVIN Amelogenin, Y isoform OS=Bos taurus OX=9913 GN=AMELY PE=2 SV=1          | 101.88   | 10.28           | 603.5      | 107       | 93            | 91          | 71.9   | 192   | 1.66E+09  |
| 3   3      | >Reverse >sp Q99004 AMELY_BOVIN Amelogenin, Y isoform OS=Bos taurus OX=9913 GN=AMELY PE=2 SV=1 | 0.01     | 2.43            | 452.6      | 6         | 6             | 5           | 59.9   | 192   | 7.25E+07  |
| 4   4      | >Reverse >sp P02817 AMELX_BOVIN Amelogenin, X isoform OS=Bos taurus OX=9913 GN=AMELX PE=1 SV=2 | 0.01     | 2.47            | 314.2      | 14        | 13            | 11          | 68.1   | 213   | 1.77E+08  |

AmelX coverage - close up

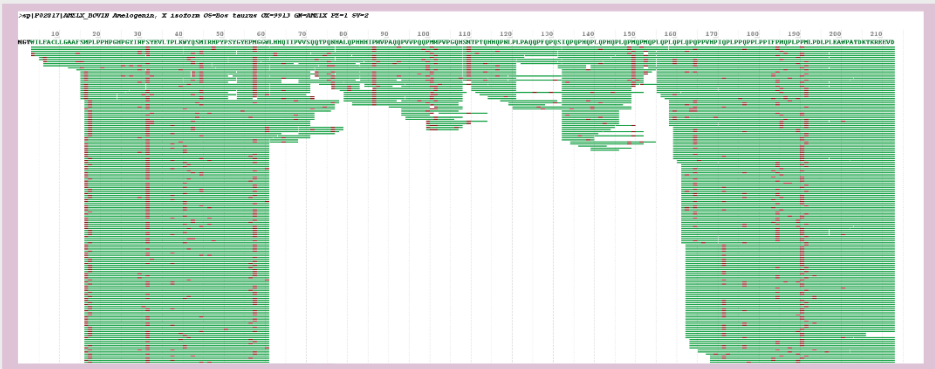

Amely coverage

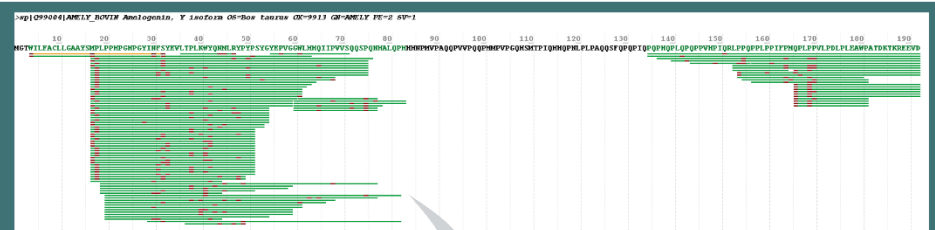

After filter (See method section)

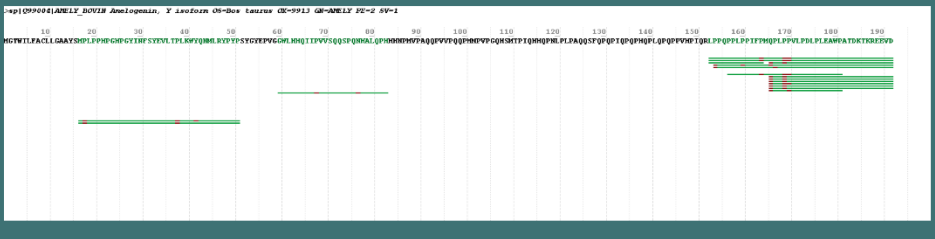

## Sample 32 - Female

AmelX

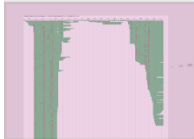

Byonic PSMs recovery (raw) data before filters on bovine amelogenin peptides.

| Prot. Rank | Protein Name                                                                                   | Log Prob | Best [Log Prob] | Best Score | # Spectra | # Uniq. Peps. | # Mod. Peps. | % Cov. | # AAs | Intensity |
|------------|------------------------------------------------------------------------------------------------|----------|-----------------|------------|-----------|---------------|--------------|--------|-------|-----------|
| 1   1      | >sp P02817 AMELX_BOVIN Amelogenin, X isoform OS=Bos taurus OX=9913 GN=AMELX PE=1 SV=2          | 5134.25  | 25.33           | 1375.2     | 4285      | 1651          | 1428         | 97.2   | 213   | 9.17E+10  |
| 2   2      | >sp Q99004 AMELY_BOVIN Amelogenin, Y isoform OS=Bos taurus OX=9913 GN=AMELY PE=2 SV=1          | 32.67    | 9.86            | 591.9      | 75        | 66            | 64           | 65.1   | 192   | 8.84E+08  |
| 3   3      | >Reverse >sp P02817 AMELX_BOVIN Amelogenin, X isoform OS=Bos taurus OX=9913 GN=AMELX PE=1 SV=2 | 0.01     | 2.06            | 319.3      | 13        | 12            | 7            | 42.3   | 213   | 1.56E+08  |
| 4   4      | >Reverse >sp Q99004 AMELY_BOVIN Amelogenin, Y isoform OS=Bos taurus OX=9913 GN=AMELY PE=2 SV=1 | 0.01     | 1.87            | 172.8      | 4         | 4             | 4            | 28.1   | 192   | 3.32E+07  |

AmelX coverage - close up

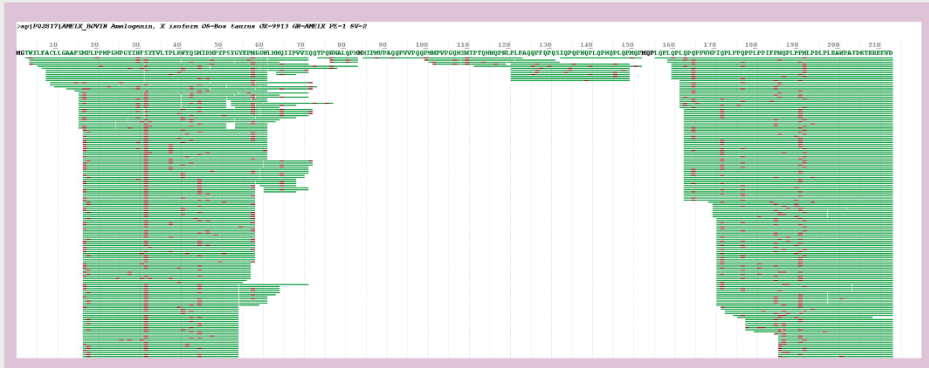

Amely coverage

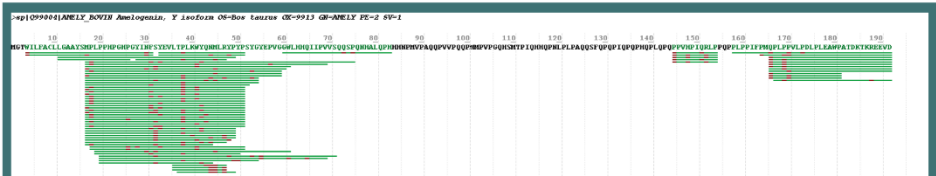

After filter (See method section)

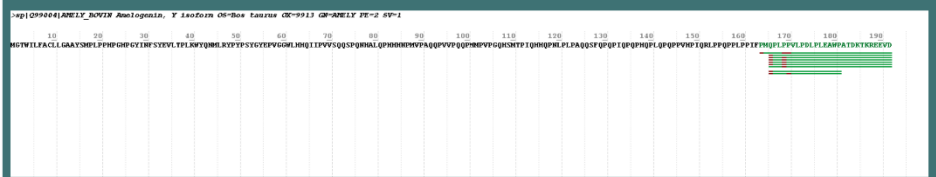

# Sample 36 - Female

AmelX

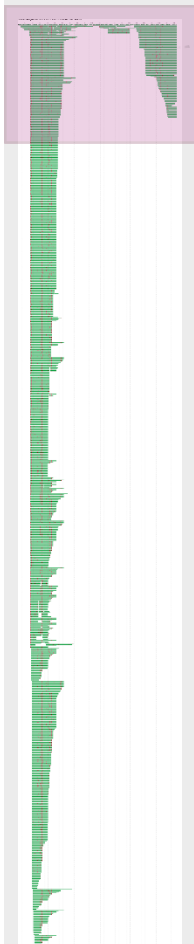

Byonic PSMs recovery (raw) data before filters on bovine amelogenin peptides.

| Prot. Rank | Protein Name                                                                                   | Log Prob | Best [Log Prob] | Best Score | # Spectra | # Uniq. Peps. | # Mod. Peps. | % Cov. | # AAs | Intensity |
|------------|------------------------------------------------------------------------------------------------|----------|-----------------|------------|-----------|---------------|--------------|--------|-------|-----------|
| 1   1      | >sp P02817 AMELX_BOVIN Amelogenin, X isoform OS=Bos taurus OX=9913 GN=AMELX PE=1 SV=2          | 3813.54  | 22.62           | 1317.2     | 3446      | 1509          | 1371         | 99.5   | 213   | 4.76E+10  |
| 2   2      | >sp Q99004 AMELY_BOVIN Amelogenin, Y isoform OS=Bos taurus OX=9913 GN=AMELY PE=2 SV=1          | 120.53   | 9.89            | 595.9      | 169       | 151           | 147          | 96.4   | 192   | 1.27E+09  |
| 3   3      | >Reverse >sp Q99004 AMELY_BOVIN Amelogenin, Y isoform OS=Bos taurus OX=9913 GN=AMELY PE=2 SV=1 | 0.01     | 1.92            | 118.6      | 6         | 6             | 6            | 40.6   | 192   | 2.30E+07  |
| 4   4      | >Reverse >sp P02817 AMELX_BOVIN Amelogenin, X isoform OS=Bos taurus OX=9913 GN=AMELX PE=1 SV=2 | 0.01     | 1.84            | 268.1      | 14        | 12            | 9            | 52.6   | 213   | 1.35E+08  |

AmelX coverage - close up

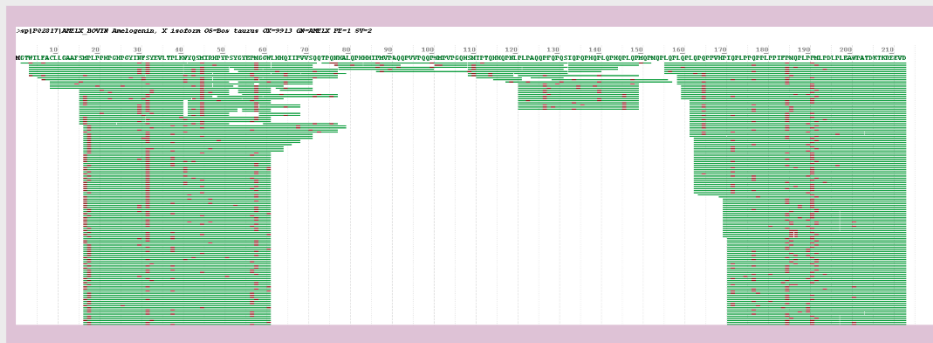

AmelY coverage

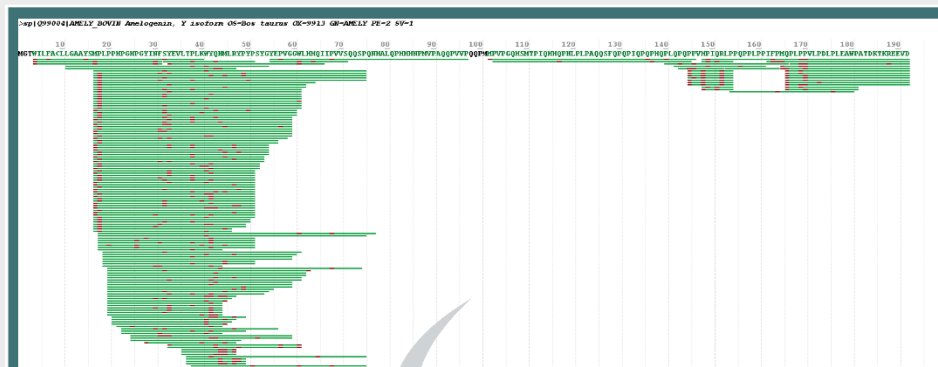

After filter (See method section)

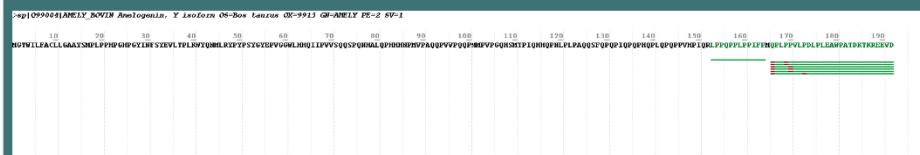



Sample 81  
- Male

Byonic PSMs recovery (raw) data before filters on bovine amelogenin peptides.

| Prot. Rank | Protein Name                                                                                   | Log Prob | Best  Log Prob | Best Score | # Spectra | # Uniq. Peps. | # Mod Peps. | % Cov. | # AAs | Intensity |
|------------|------------------------------------------------------------------------------------------------|----------|----------------|------------|-----------|---------------|-------------|--------|-------|-----------|
| 1   1      | >sp P02817 AMELX_BOVIN Amelogenin, X isoform OS=Bos taurus OX=9913 GN=AMELX PE=1 SV=2          | 3081.99  | 19.88          | 1150.4     | 2288      | 1046          | 888         | 97.7   | 213   | 1.78E+10  |
| 2   2      | >sp Q99004 AMELY_BOVIN Amelogenin, Y isoform OS=Bos taurus OX=9913 GN=AMELY PE=2 SV=1          | 361.51   | 18.59          | 1114.7     | 191       | 147           | 119         | 91.7   | 192   | 1.44E+09  |
| 3   3      | >Reverse >sp Q99004 AMELY_BOVIN Amelogenin, Y isoform OS=Bos taurus OX=9913 GN=AMELY PE=2 SV=1 | 0.01     | 1.95           | 282.3      | 56        | 53            | 44          | 81.2   | 192   | 2.24E+08  |
| 4   4      | >Reverse >sp P02817 AMELX_BOVIN Amelogenin, X isoform OS=Bos taurus OX=9913 GN=AMELX PE=1 SV=2 | 0.01     | 1.72           | 209.3      | 33        | 32            | 26          | 72.8   | 213   | 1.19E+08  |

AmelX

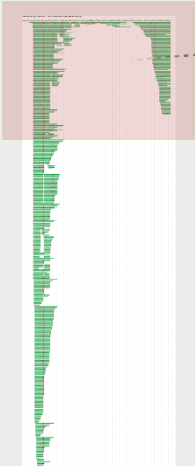

AmelX coverage - close up

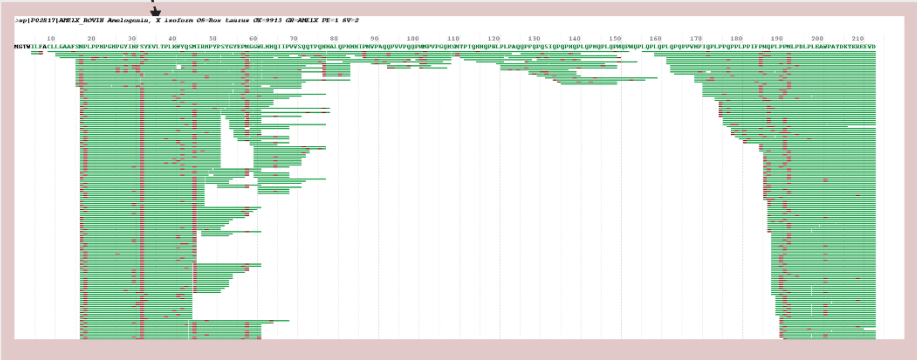

Amely coverage

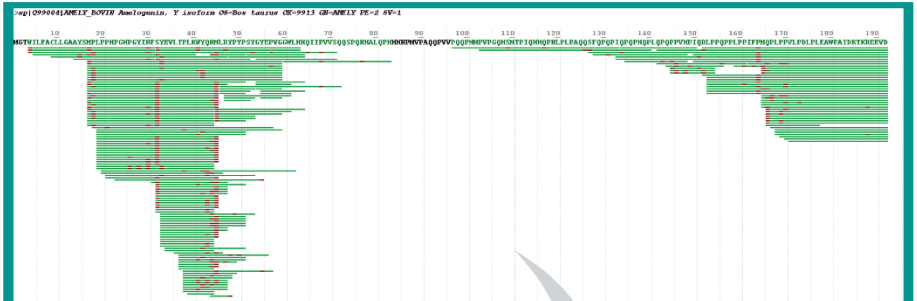

After filter (See method section)

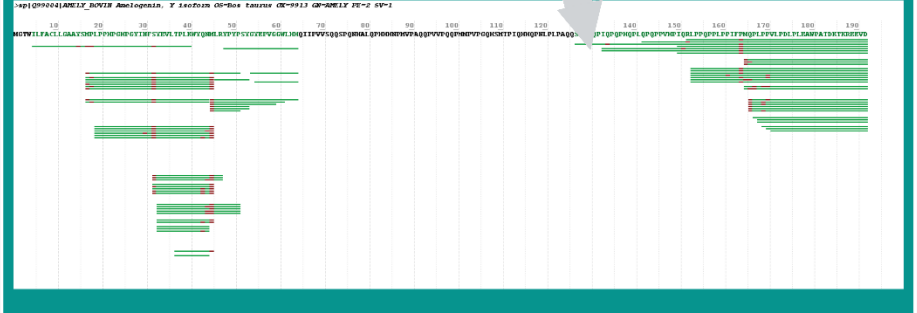

Sample 82  
- Unknown

Byonic PSMs recovery (raw) data before filters on bovine amelogenin peptides.

| Prot. Rank | Protein Name                                                                                   | Log Prob | Best  Log Prob | Best Score | # Spectra | # Uniq. Peps. | # Mod Peps. | % Cov. | # AAs | Intensity |
|------------|------------------------------------------------------------------------------------------------|----------|----------------|------------|-----------|---------------|-------------|--------|-------|-----------|
| 1   1      | >sp P02817 AMELX_BOVIN Amelogenin, X isoform OS=Bos taurus OX=9913 GN=AMELX PE=1 SV=2          | 3589.34  | 18.49          | 1059.8     | 3226      | 1125          | 925         | 84.5   | 213   | 2.24E+10  |
| 2   2      | >sp Q99004 AMELY_BOVIN Amelogenin, Y isoform OS=Bos taurus OX=9913 GN=AMELY PE=2 SV=1          | 377.17   | 8.47           | 637        | 312       | 196           | 144         | 66.1   | 192   | 8.69E+08  |
| 3   3      | >Reverse >sp P02817 AMELX_BOVIN Amelogenin, X isoform OS=Bos taurus OX=9913 GN=AMELX PE=1 SV=2 | 0.01     | 2.85           | 343.9      | 104       | 79            | 62          | 56.3   | 213   | 3.60E+08  |
| 4   4      | >Reverse >sp Q99004 AMELY_BOVIN Amelogenin, Y isoform OS=Bos taurus OX=9913 GN=AMELY PE=2 SV=1 | 0.01     | 1.39           | 258.4      | 20        | 17            | 14          | 38     | 192   | 4.20E+07  |

AmelX

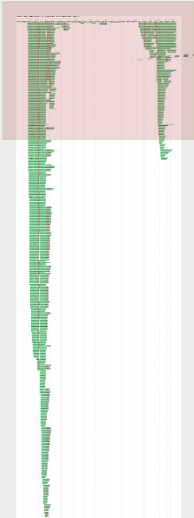

AmelX coverage - close up

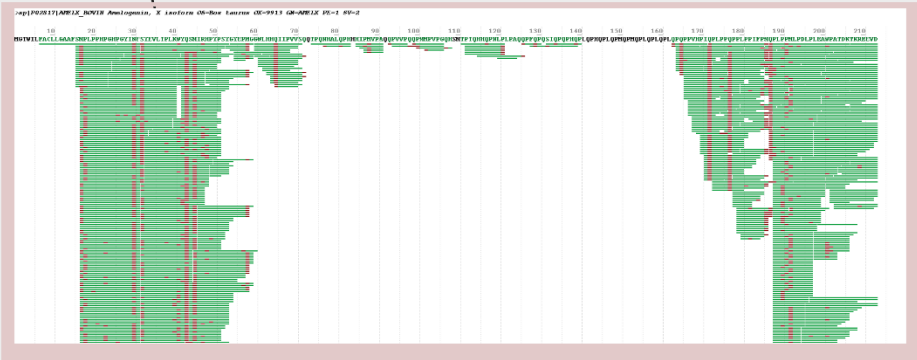

Amely coverage

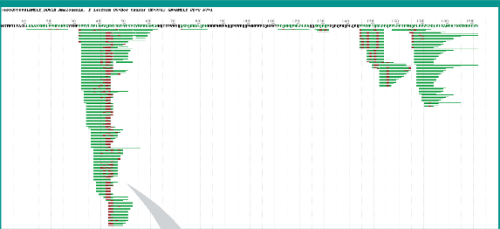

After filter (See method section)

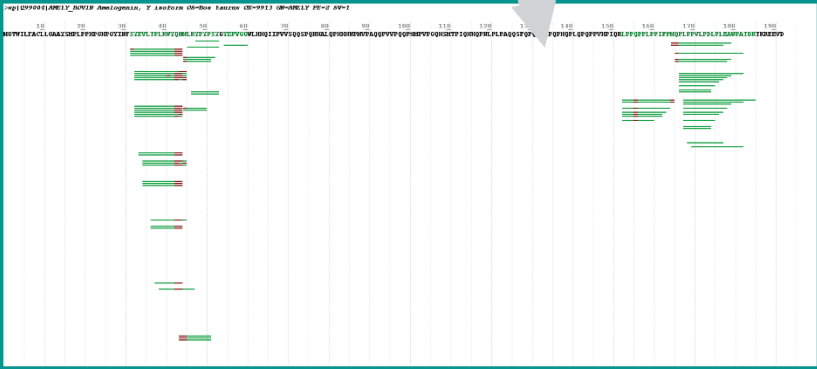

Sample 84  
- Unknown

Byonic PSMs recovery (raw) data before filters on bovine amelogenin peptides.

| Prot. Rank | Protein Name                                                                                   | Log Prob | Best [Log Prob] | Best Score | # Spectra | # Uniq. Peps. | # Mod Peps. | % Cov. | # AAs | Intensity |
|------------|------------------------------------------------------------------------------------------------|----------|-----------------|------------|-----------|---------------|-------------|--------|-------|-----------|
| 1   1      | >sp P02817 AMELX_BOVIN Amelogenin, X isoform OS=Bos taurus OX=9913 GN=AMELX PE=1 SV=2          | 4230.89  | 19.81           | 1119.4     | 3075      | 1104          | 926         | 68.1   | 213   | 3.01E+10  |
| 2   2      | >sp Q99004 AMELY_BOVIN Amelogenin, Y isoform OS=Bos taurus OX=9913 GN=AMELY PE=2 SV=1          | 0.01     | 5.44            | 595.4      | 24        | 19            | 18          | 40.1   | 192   | 1.12E+08  |
| 3   3      | >Reverse >sp P02817 AMELX_BOVIN Amelogenin, X isoform OS=Bos taurus OX=9913 GN=AMELX PE=1 SV=2 | 0.01     | 2.36            | 322.4      | 18        | 15            | 14          | 32.4   | 213   | 7.40E+07  |
| 4   4      | >Reverse >sp Q99004 AMELY_BOVIN Amelogenin, Y isoform OS=Bos taurus OX=9913 GN=AMELY PE=2 SV=1 | 0.01     | 1.62            | 146.6      | 1         | 1             | 1           | 2.6    | 192   | 1.56E+06  |

AmelX

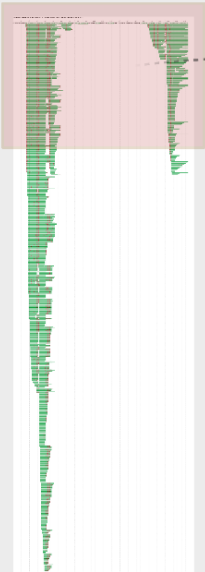

AmelX coverage - close up

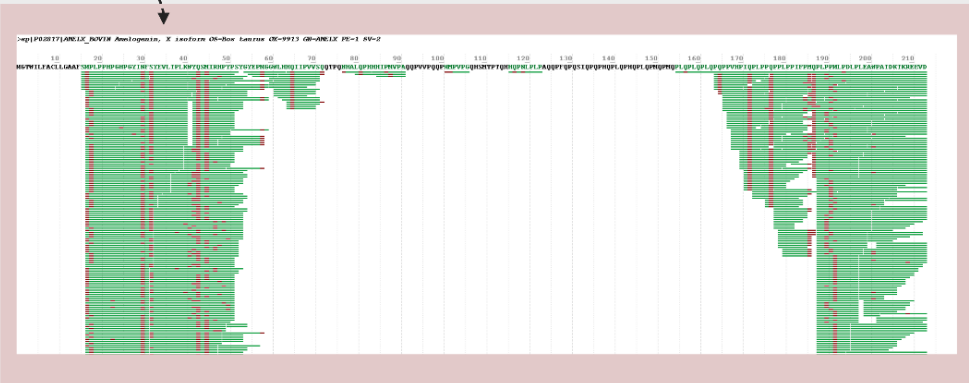

Amely coverage

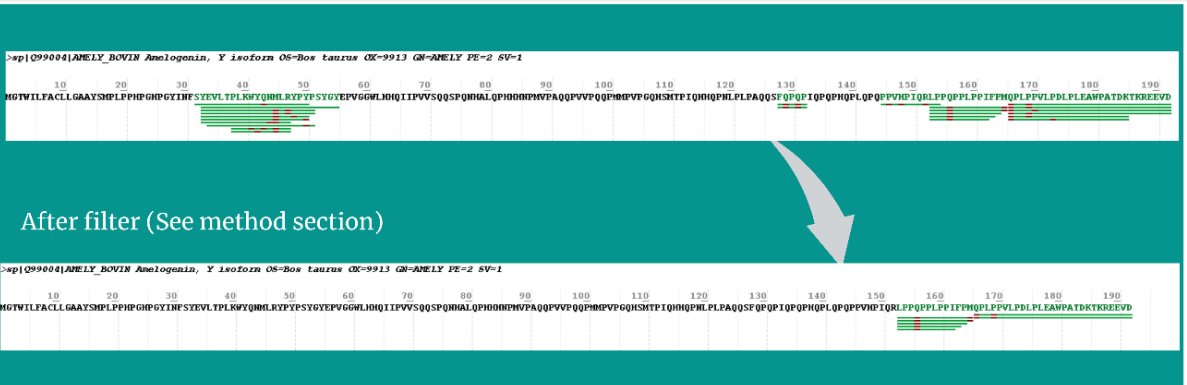

SI 1: Photos of modern and Neolithic teeth sampling procedure

Modern cattle (*Bos taurus*), In total 8 samples (4 Females, 4 Males), obtained from the abattoir Tira Ltd., Israel

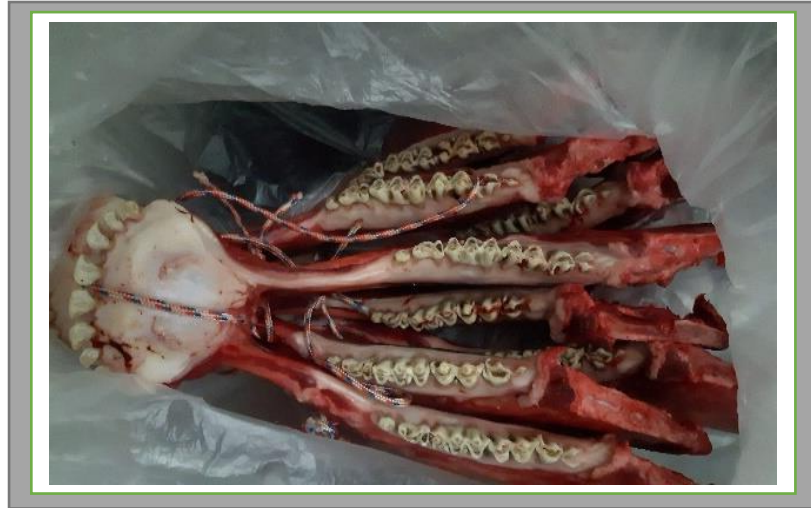

Figure 2. Four complete male cattle mandibles photographed when they were first received from the abattoir.

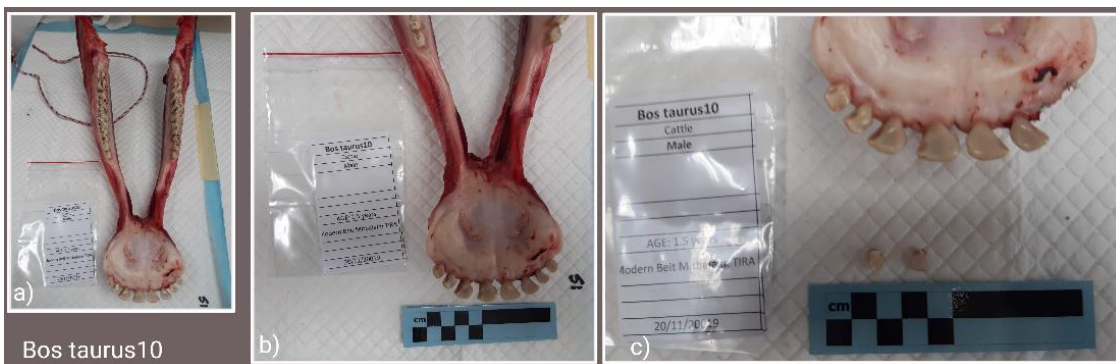

Figure 3. Process of tooth identification and selection (a and b); incisors I3 and I4 extracted for further cleaning and enamel peptide extraction (c).

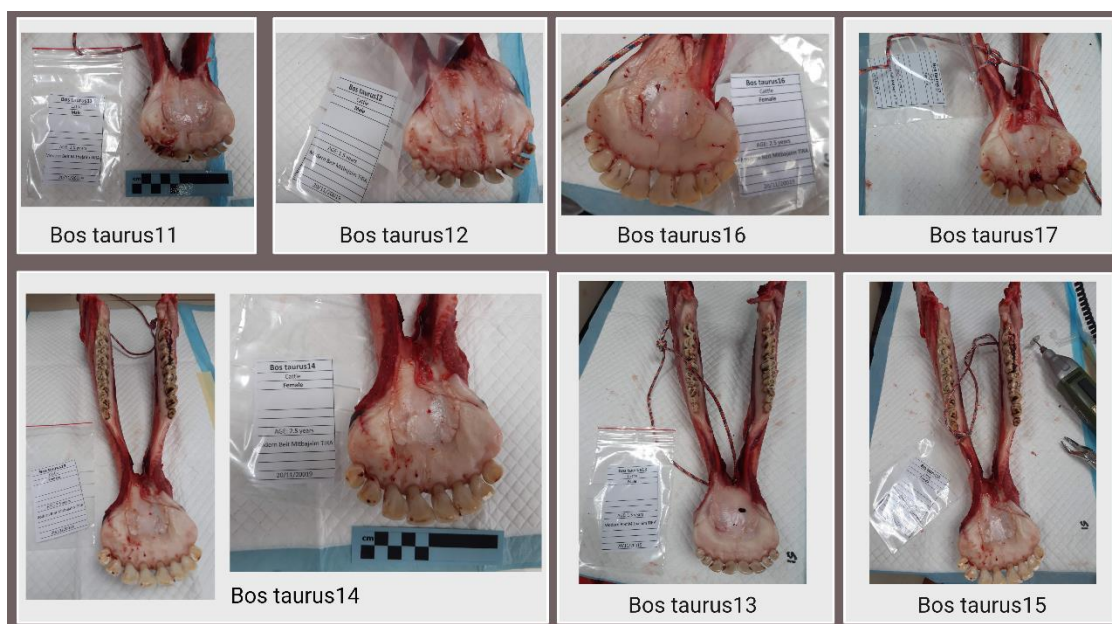

Figure 4. Figure 5. Modern mandibles with their specimen IDs: *Bos taurus* 10 to 17

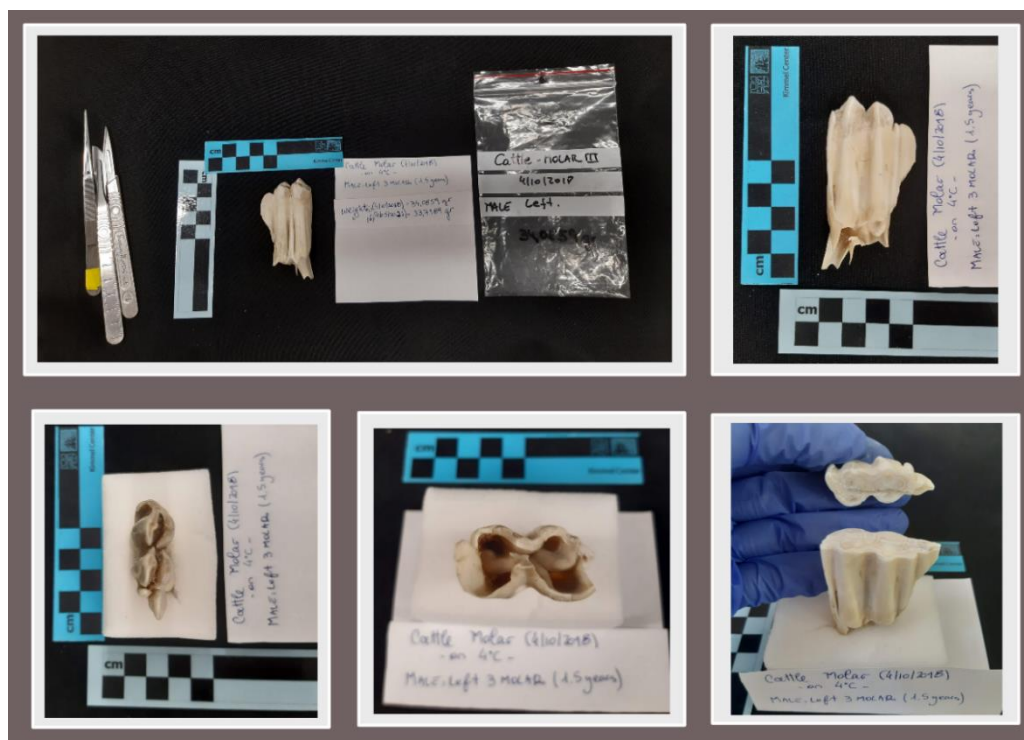

Figure 6 - Photos show modern cattle lower third molar Sample 81 (WIS 101) before enamel extraction.

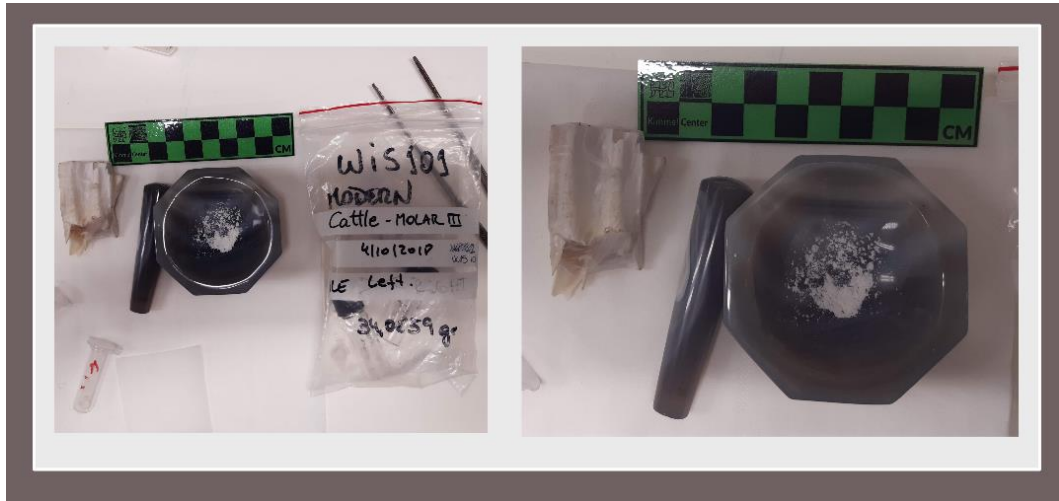

etching or demineralizing process with HCl 5%.



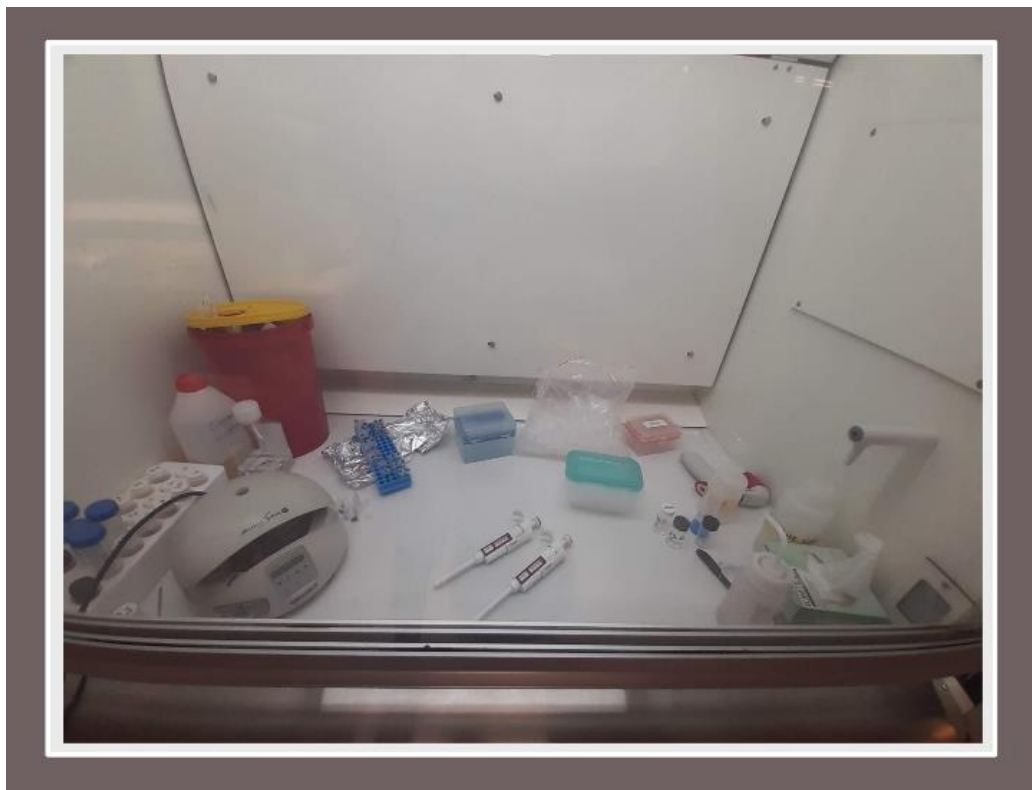

**Figure 8. Work conditions for enamel peptide extraction under a chemical hood.**

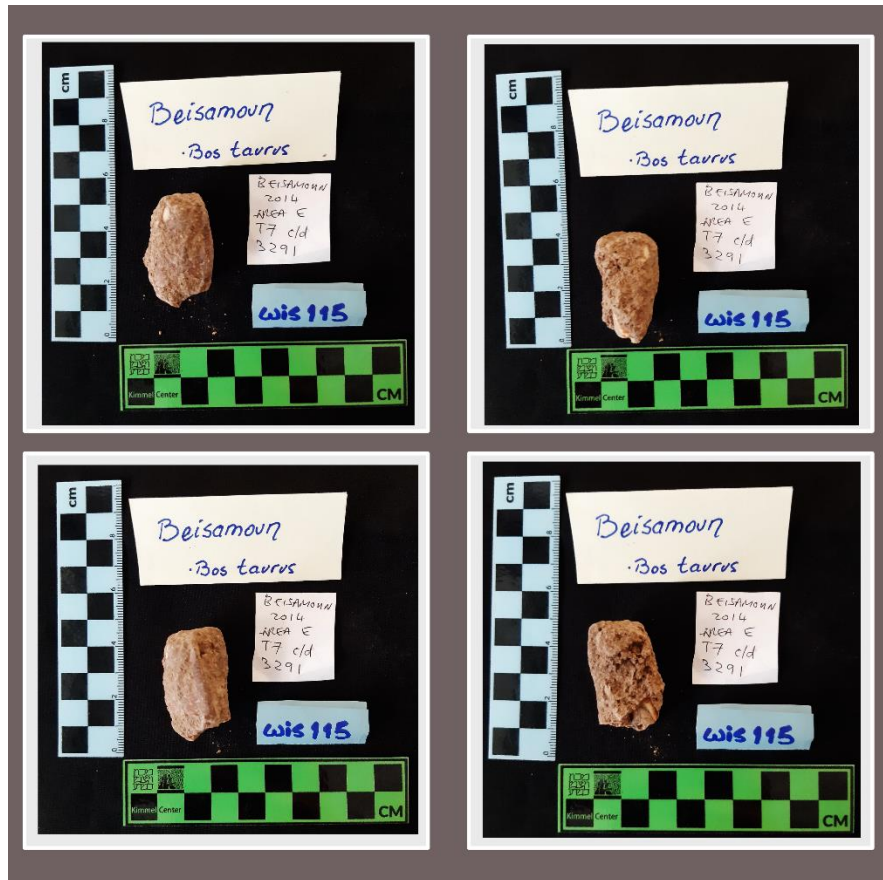

Figure 7. Sample 82 – Beisamoun, Neolithic period, *Bos* sp. Molar, unknown sex. The sample was enclosed in a “cement” matrix that was only possible to remove with mechanical tools.



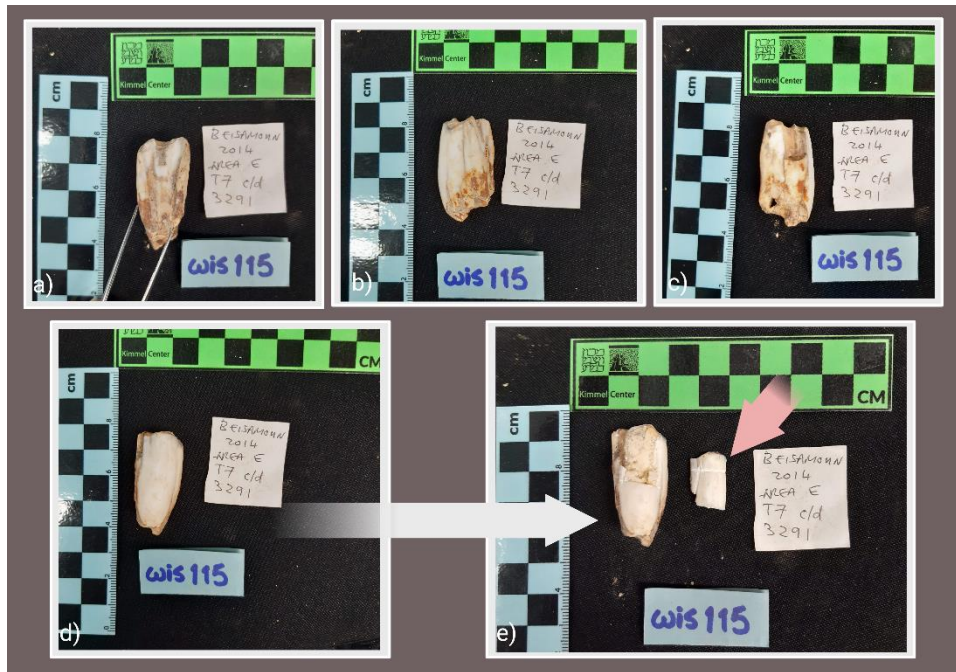

Figure 8 a-d show sample 82 (Wis115) after sediment has been removed with mechanical tools. 8e shows the enamel fragment after extraction from the molar, the pink arrow show the enamel fragment.

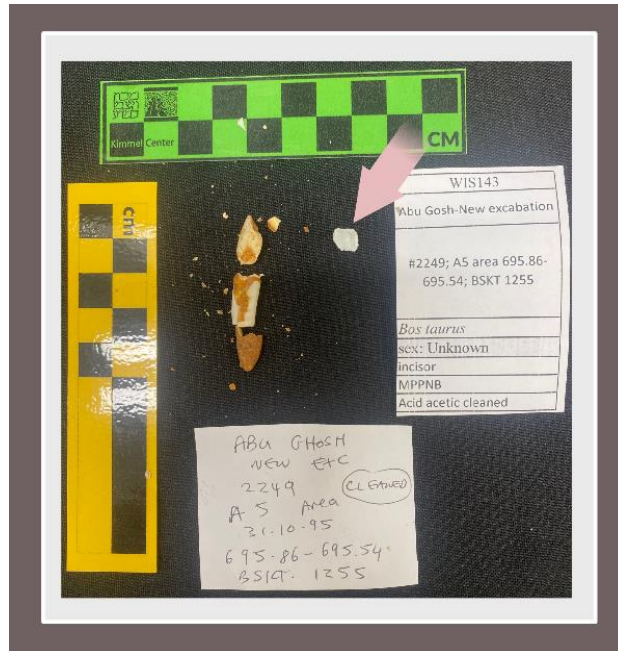

**Figure 9. Sample 84 – Abu Gosh, Neolithic. *Bos* sp. incisor. The pink arrow shows the enamel fragment after its been cut from the tooth.**
