# Supplementary material for: A Peptidomics Method for Assessing Sex from Modern and Ancient Bovine Tooth Enamel.
Source: Research Square preprint supplement (doi:10.21203/rs.3.rs-3766361/v1), 2024-01-29
Supplement: Supplementary file 2 [file 1d46a4a852632c75c4f5d414.xlsx]

## Sheet: Summary
Summary:
	1) Input data file: H:\Proteomics\Projects\Boaretto\INCPM_10472\Raw_files\HF1_10472_EBO_28_1_261219.raw
	2) Protein database: H:\Proteomics\Projects\Boaretto\INCPM_18273\AMELs Cattle fasta Pau 2.Fasta
	3) Parameter file: D:\Boaretto\HF1_10472_EBO_28_1_261219.raw_20230418_Amel\objs\params.prf
	4) Date/Time: April 18, 2023 5:48:16 AM IDT
	5) RunTime: 2 hours, 32 minutes, 54 seconds; on 34 cores
Summary Statistics:
	1) Reporting 2 forward and 2 reverse proteins
	2) 1550 unique forward peptides
	3) 3847 spectra matched to forward peptides
	4) Estimated spectrum-level FDR on true proteins is 2.2%
Recorded protein search configuration:
Num	Rule	Value
0	Protein database	H:\Proteomics\Projects\Boaretto\INCPM_18273\AMELs Cattle fasta Pau 2.Fasta
1	Spectrum-level FDR	Auto cut
2	Cleavage residues	KR
3	Digest cutter	C-terminal cutter
4	Peptide termini	Non specific
5	Maximum number of missed cleavages	Any missed cleavages (-1)
6	Precursor tolerance	10.0 ppm
7	Fragment tolerance	frag:qtof_hcd 20.0 ppm
8	Fragment tolerance version	2
9	Charges applied to charge-unassigned spectra:	1,2,3
10	Precursor mass max	7500.0
11	N-glycan search	None
12	O-glycan search	None
13	Off by x isotopes	-2,-1,0,+1,+2
14	Contaminants added	false
15	Decoys added	true
16	%Additional parameters:
17	Disulfide Enable	false
18	Trisulfide Enable	false
19	DSS Crosslink Enable	false
20	Custom Crosslink Enable	false
21	Wildcard Enable	0
22	Combyne cut off score	Auto
23	Protein FDR cutoff	1%
24	Focused DB created	true
25	Export mzIdentML	true
26	Score version	2
27	precursor_assignment_flags	2
28	po_NumberMonosReturn	2
29	Lock mass list	None
30	do_quick_rejects	0
31	%Modification searches:
32	common_modifications_max	2
33	rare_modifications_max	2
34	%Fixed and variable modifications:
35	Oxidation / +15.994915 @ F, H, K, M, P, W, Y | common2
36	Deamidated / +0.984016 @ N, Q, R | common2
37	Acetyl / +42.010565 @ Protein NTerm | rare1
38	Dioxidation / +31.989829 @ F, M, P, W, Y | rare2
39	Gln->pyro-Glu / -17.026549 @ Protein NTerm Q | rare1
40	Glu->pyro-Glu / -18.010565 @ Protein NTerm E | rare1
41	Phospho / +79.966331 @ S | rare1
42	% Custom modification text below
43	%Glycan modifications:
44	% Custom modification text below
45	Show all N-glycopeptides	0
46	%Addition parameters:
47	Product Version	PMI-Byonic-Com:v4.6.1
48	Registered to	david Morgenstern G-INCPM

## Sheet: Spectra
Query #:z	Protein Rank	Peptide < ProteinMetrics Confidential >	Glycans NHFAGNa	Modification Type(s)	Observed m/z	z	Observed (M+H)	Calc. mass (M+H)	Off-by-x error	Mass error (ppm)	Starting position	Cleavage	Score	Delta	Delta Mod	|Log Prob|	# of unique peptides	Protein Name	Protein DB number	Comment	Scan #	Scan Time
35186:6	1	-.[+42.011].MGTWILFACLLGAAFSMPLPPHPGHPGYINFS[+79.966]YEVLTPLK.W		.[42], S[+80]	752.201	6	4508.17	4508.21	0	-8.7	1	NRagged	80.91	80.91	30.06	0.25	1278	>sp|P02817|AMELX_BOVIN Amelogenin, X isoform OS=Bos taurus OX=9913 GN=AMELX PE=1 SV=2	1	hf1_10472_ebo_28_1_261219.ScanId;v=1;d1=25741.25741.6	controllerType=0 controllerNumber=1 scan=25741	52.5414
21079:4	1	T.W[+15.995]ILF[+31.990]ACLLGAAFSM[+15.995]PLPPHPGHPGYINF.S		F[+32], M[+16], W[+16]	783.391	4	3130.54	3130.53	0	3.9	4	Non	158.64	3.5	3.5	1.12	1278	>sp|P02817|AMELX_BOVIN Amelogenin, X isoform OS=Bos taurus OX=9913 GN=AMELX PE=1 SV=2	1	hf1_10472_ebo_28_1_261219.ScanId;v=1;d1=16175.16175.4	controllerType=0 controllerNumber=1 scan=16175	35.9722
20733:4	1	T.W[+15.995]ILF[+31.990]ACLLGAAFSM[+15.995]PLPPHPGHPGYINF.S		F[+32], M[+16], W[+16]	783.391	4	3130.54	3130.53	0	3.6	4	Non	217.24	15.24	14.72	2.14	1278	>sp|P02817|AMELX_BOVIN Amelogenin, X isoform OS=Bos taurus OX=9913 GN=AMELX PE=1 SV=2	1	hf1_10472_ebo_28_1_261219.ScanId;v=1;d1=15935.15935.4	controllerType=0 controllerNumber=1 scan=15935	35.5578
33855:6	1	T.WILFACLLGAAFSMPLPPHPGHPGYINFS[+79.966]YEVLTPLK.W		S[+80]	697.018	6	4177.07	4177.09	0	-3.9	4	NRagged	167.7	106.29	75.46	1.32	1278	>sp|P02817|AMELX_BOVIN Amelogenin, X isoform OS=Bos taurus OX=9913 GN=AMELX PE=1 SV=2	1	hf1_10472_ebo_28_1_261219.ScanId;v=1;d1=24839.24839.6	controllerType=0 controllerNumber=1 scan=24839	50.9575
28970:4	1	T.WILFACLLGAAFSMP[+15.995]LPPHPGHPGYINFS[+79.966]YEVLTPLK.W		P[+16], S[+80]	1049.04	4	4193.12	4193.08	0	8.7	4	NRagged	317.44	29.7	28.25	3.35	1278	>sp|P02817|AMELX_BOVIN Amelogenin, X isoform OS=Bos taurus OX=9913 GN=AMELX PE=1 SV=2	1	hf1_10472_ebo_28_1_261219.ScanId;v=1;d1=21506.21506.4	controllerType=0 controllerNumber=1 scan=21506	45.1491
37922:4	1	L.LGAAF[+15.995]SMPLPPH[+15.995]PGHPGYINFS[+79.966]YEVLTPLKWYQSM.I		F[+16], H[+16], S[+80]	1014.98	4	4056.9	4057.91	-1	0.4	11	Non	12.77	12.77	0	0.49	1278	>sp|P02817|AMELX_BOVIN Amelogenin, X isoform OS=Bos taurus OX=9913 GN=AMELX PE=1 SV=2	1	hf1_10472_ebo_28_1_261219.ScanId;v=1;d1=27588.27588.3	controllerType=0 controllerNumber=1 scan=27588	55.8162
16440:2	1	G.AAFSMPLPPHPGHPG.Y			756.88	2	1512.75	1512.74	0	8	13	Non	34.5	32.49	32.49	0.25	1278	>sp|P02817|AMELX_BOVIN Amelogenin, X isoform OS=Bos taurus OX=9913 GN=AMELX PE=1 SV=2	1	hf1_10472_ebo_28_1_261219.ScanId;v=1;d1=12961.12961.2	controllerType=0 controllerNumber=1 scan=12961	30.4163
31202:4	1	G.AAFSMPLPPHPGHPGYINF[+31.990]SYEVLTPLK.W		F[+32]	778.897	4	3112.57	3112.56	0	1.9	13	NRagged	35.45	7.59	7.59	0.94	1278	>sp|P02817|AMELX_BOVIN Amelogenin, X isoform OS=Bos taurus OX=9913 GN=AMELX PE=1 SV=2	1	hf1_10472_ebo_28_1_261219.ScanId;v=1;d1=23027.23027.4	controllerType=0 controllerNumber=1 scan=23027	47.7926
11107:3	1	A.F[+15.995]SMPLPPHPGHPGYIN.F		F[+16]	592.96	3	1776.86	1776.85	0	6.4	15	Non	73.6	3.27	0	0.26	1278	>sp|P02817|AMELX_BOVIN Amelogenin, X isoform OS=Bos taurus OX=9913 GN=AMELX PE=1 SV=2	1	hf1_10472_ebo_28_1_261219.ScanId;v=1;d1=9362.9362.3	controllerType=0 controllerNumber=1 scan=9362	24.128
33070:4	1	A.FSM[+31.990]PLPPHPGHPGYINF[+31.990]SYEVLTPLK.W		F[+32], M[+32]	751.367	4	3002.45	3002.48	0	-9.6	15	NRagged	31.46	0.57	0.57	1.03	1278	>sp|P02817|AMELX_BOVIN Amelogenin, X isoform OS=Bos taurus OX=9913 GN=AMELX PE=1 SV=2	1	hf1_10472_ebo_28_1_261219.ScanId;v=1;d1=24307.24307.4	controllerType=0 controllerNumber=1 scan=24307	50.028
30720:3	1	F.SMPLPPHPGHPGYINFS[+79.966]YEVLTPLK.W		S[+80]	957.809	3	2871.41	2871.39	0	6.4	16	NRagged	555.43	555.43	215.71	8.48	1278	>sp|P02817|AMELX_BOVIN Amelogenin, X isoform OS=Bos taurus OX=9913 GN=AMELX PE=1 SV=2	1	hf1_10472_ebo_28_1_261219.ScanId;v=1;d1=22703.22703.3	controllerType=0 controllerNumber=1 scan=22703	47.2286
30764:3	1	F.SMPLPPHPGHPGYINFS[+79.966]YEVLTPLK.W		S[+80]	957.81	3	2871.41	2871.39	0	7.1	16	NRagged	609.64	609.64	186.06	10.27	1278	>sp|P02817|AMELX_BOVIN Amelogenin, X isoform OS=Bos taurus OX=9913 GN=AMELX PE=1 SV=2	1	hf1_10472_ebo_28_1_261219.ScanId;v=1;d1=22730.22730.3	controllerType=0 controllerNumber=1 scan=22730	47.2738
29956:3	1	F.SM[+15.995]PLPPHPGHPGYINFS[+79.966]YEVLTPLK.W		M[+16], S[+80]	963.142	3	2887.41	2887.39	0	7.5	16	NRagged	136.11	136.11	53.39	3.36	1278	>sp|P02817|AMELX_BOVIN Amelogenin, X isoform OS=Bos taurus OX=9913 GN=AMELX PE=1 SV=2	1	hf1_10472_ebo_28_1_261219.ScanId;v=1;d1=22171.22171.3	controllerType=0 controllerNumber=1 scan=22171	46.3064
33573:3	1	F.SMPLPPHPGHPGYIN[+0.984]FS[+79.966]YEVLTPLK.W		N[+1], S[+80]	958.124	3	2872.36	2872.38	0	-7.5	16	NRagged	179.43	179.43	179.43	2.26	1278	>sp|P02817|AMELX_BOVIN Amelogenin, X isoform OS=Bos taurus OX=9913 GN=AMELX PE=1 SV=2	1	hf1_10472_ebo_28_1_261219.ScanId;v=1;d1=24651.24651.3	controllerType=0 controllerNumber=1 scan=24651	50.631
29644:3	1	F.SM[+15.995]PLPPHPGHPGYINFS[+79.966]YEVLTPLK.W		M[+16], S[+80]	963.144	3	2887.42	2887.39	0	9.8	16	NRagged	201.24	201.24	51.11	3.34	1278	>sp|P02817|AMELX_BOVIN Amelogenin, X isoform OS=Bos taurus OX=9913 GN=AMELX PE=1 SV=2	1	hf1_10472_ebo_28_1_261219.ScanId;v=1;d1=21966.21966.3	controllerType=0 controllerNumber=1 scan=21966	45.9515
29277:3	1	F.SM[+15.995]PLPPHPGHPGYINFS[+79.966]YEVLTPLK.W		M[+16], S[+80]	963.138	3	2887.4	2887.39	0	4.1	16	NRagged	634.82	634.82	189.06	9.76	1278	>sp|P02817|AMELX_BOVIN Amelogenin, X isoform OS=Bos taurus OX=9913 GN=AMELX PE=1 SV=2	1	hf1_10472_ebo_28_1_261219.ScanId;v=1;d1=21717.21717.3	controllerType=0 controllerNumber=1 scan=21717	45.5175
30103:3	1	F.SMPLPPHPGHPGYIN[+0.984]F[+31.990]SY[+31.990]EVLTPLK.W		F[+32], N[+1], Y[+32]	952.805	3	2856.4	2856.39	0	3.7	16	NRagged	57.38	34.68	6.69	1.03	1278	>sp|P02817|AMELX_BOVIN Amelogenin, X isoform OS=Bos taurus OX=9913 GN=AMELX PE=1 SV=2	1	hf1_10472_ebo_28_1_261219.ScanId;v=1;d1=22273.22273.3	controllerType=0 controllerNumber=1 scan=22273	46.4854
30489:4	1	F.SM[+31.990]PLPPHPGHPGYIN[+0.984]F[+31.990]SYEVLTPLK.W		F[+32], M[+32], N[+1]	714.854	4	2856.39	2856.39	0	1	16	NRagged	59.55	59.55	0	0.92	1278	>sp|P02817|AMELX_BOVIN Amelogenin, X isoform OS=Bos taurus OX=9913 GN=AMELX PE=1 SV=2	1	hf1_10472_ebo_28_1_261219.ScanId;v=1;d1=22544.22544.4	controllerType=0 controllerNumber=1 scan=22544	46.9537
30158:4	1	F.SMPLPPHPGHPGY[+31.990]IN[+0.984]F[+31.990]SYEVLTPLK.W		F[+32], N[+1], Y[+32]	714.854	4	2856.4	2856.39	0	1.5	16	NRagged	65.63	65.63	0	0.92	1278	>sp|P02817|AMELX_BOVIN Amelogenin, X isoform OS=Bos taurus OX=9913 GN=AMELX PE=1 SV=2	1	hf1_10472_ebo_28_1_261219.ScanId;v=1;d1=22307.22307.4	controllerType=0 controllerNumber=1 scan=22307	46.5436
31469:4	1	F.SMPLPPHPGHPGY[+15.995]IN[+0.984]F[+31.990]SYEVLTPLK.W		F[+32], N[+1], Y[+16]	710.856	4	2840.4	2840.4	0	1.6	16	NRagged	102.65	102.65	2.5	2.17	1278	>sp|P02817|AMELX_BOVIN Amelogenin, X isoform OS=Bos taurus OX=9913 GN=AMELX PE=1 SV=2	1	hf1_10472_ebo_28_1_261219.ScanId;v=1;d1=23218.23218.4	controllerType=0 controllerNumber=1 scan=23218	48.1244
30019:4	1	F.SMPLPP[+31.990]HPGHPGY[+31.990]IN[+0.984]FSYEVLTPLK.W		N[+1], P[+32], Y[+32]	714.855	4	2856.4	2856.39	0	2.3	16	NRagged	117.5	117.5	2.74	1.01	1278	>sp|P02817|AMELX_BOVIN Amelogenin, X isoform OS=Bos taurus OX=9913 GN=AMELX PE=1 SV=2	1	hf1_10472_ebo_28_1_261219.ScanId;v=1;d1=22215.22215.4	controllerType=0 controllerNumber=1 scan=22215	46.3814
29659:4	1	F.SMP[+31.990]LPPHPGHPGYIN[+0.984]FSY[+31.990]EVLTPLK.W		N[+1], P[+32], Y[+32]	714.856	4	2856.4	2856.39	0	4	16	NRagged	120.32	15.31	0	2.19	1278	>sp|P02817|AMELX_BOVIN Amelogenin, X isoform OS=Bos taurus OX=9913 GN=AMELX PE=1 SV=2	1	hf1_10472_ebo_28_1_261219.ScanId;v=1;d1=21976.21976.4	controllerType=0 controllerNumber=1 scan=21976	45.9689
29804:3	1	F.SMPLPPHPGHP[+31.990]GYIN[+0.984]F[+31.990]SYEVLTPLK.W		F[+32], N[+1], P[+32]	952.805	3	2856.4	2856.39	0	3.4	16	NRagged	120.34	16.62	1.44	1.03	1278	>sp|P02817|AMELX_BOVIN Amelogenin, X isoform OS=Bos taurus OX=9913 GN=AMELX PE=1 SV=2	1	hf1_10472_ebo_28_1_261219.ScanId;v=1;d1=22071.22071.3	controllerType=0 controllerNumber=1 scan=22071	46.1326
29857:4	1	F.SM[+31.990]PLPPHPGHPGYIN[+0.984]F[+31.990]SYEVLTPLK.W		F[+32], M[+32], N[+1]	714.856	4	2856.4	2856.39	0	3.1	16	NRagged	131.07	131.07	0	2.39	1278	>sp|P02817|AMELX_BOVIN Amelogenin, X isoform OS=Bos taurus OX=9913 GN=AMELX PE=1 SV=2	1	hf1_10472_ebo_28_1_261219.ScanId;v=1;d1=22107.22107.4	controllerType=0 controllerNumber=1 scan=22107	46.1947
31375:4	1	F.SMPLPPHPGHPGY[+15.995]IN[+0.984]F[+31.990]SYEVLTPLK.W		F[+32], N[+1], Y[+16]	710.855	4	2840.4	2840.4	0	0.5	16	NRagged	136.01	136.01	0	2.48	1278	>sp|P02817|AMELX_BOVIN Amelogenin, X isoform OS=Bos taurus OX=9913 GN=AMELX PE=1 SV=2	1	hf1_10472_ebo_28_1_261219.ScanId;v=1;d1=23148.23148.4	controllerType=0 controllerNumber=1 scan=23148	48.0029
17884:2	1	S.MPLPPHP.G			394.712	2	788.417	788.412	0	5.6	17	Non	191.71	152.71	152.71	1.04	1278	>sp|P02817|AMELX_BOVIN Amelogenin, X isoform OS=Bos taurus OX=9913 GN=AMELX PE=1 SV=2	1	hf1_10472_ebo_28_1_261219.ScanId;v=1;d1=13962.13962.2	controllerType=0 controllerNumber=1 scan=13962	32.1524
00459:2	1	S.MPLPPHP.G			394.712	2	788.416	788.412	0	4.2	17	Non	228.79	159.72	159.72	2.18	1278	>sp|P02817|AMELX_BOVIN Amelogenin, X isoform OS=Bos taurus OX=9913 GN=AMELX PE=1 SV=2	1	hf1_10472_ebo_28_1_261219.ScanId;v=1;d1=1883.1883.2	controllerType=0 controllerNumber=1 scan=1883	10.138
17555:2	1	S.MPLPPHP.G			394.712	2	788.418	788.412	0	6.6	17	Non	296.23	160.19	160.19	3.03	1278	>sp|P02817|AMELX_BOVIN Amelogenin, X isoform OS=Bos taurus OX=9913 GN=AMELX PE=1 SV=2	1	hf1_10472_ebo_28_1_261219.ScanId;v=1;d1=13741.13741.2	controllerType=0 controllerNumber=1 scan=13741	31.7685
15314:2	1	S.MPLPPHP.G			394.712	2	788.416	788.412	0	4.9	17	Non	351.82	194.23	194.23	3.5	1278	>sp|P02817|AMELX_BOVIN Amelogenin, X isoform OS=Bos taurus OX=9913 GN=AMELX PE=1 SV=2	1	hf1_10472_ebo_28_1_261219.ScanId;v=1;d1=12215.12215.2	controllerType=0 controllerNumber=1 scan=12215	29.1247
15907:2	1	S.MPLPPHP.G			394.712	2	788.417	788.412	0	5.7	17	Non	378.21	198.8	198.8	3.58	1278	>sp|P02817|AMELX_BOVIN Amelogenin, X isoform OS=Bos taurus OX=9913 GN=AMELX PE=1 SV=2	1	hf1_10472_ebo_28_1_261219.ScanId;v=1;d1=12607.12607.2	controllerType=0 controllerNumber=1 scan=12607	29.8111
16512:2	1	S.MPLPPHP.G			394.712	2	788.417	788.412	0	5.2	17	Non	387.45	228.11	228.11	3.75	1278	>sp|P02817|AMELX_BOVIN Amelogenin, X isoform OS=Bos taurus OX=9913 GN=AMELX PE=1 SV=2	1	hf1_10472_ebo_28_1_261219.ScanId;v=1;d1=13012.13012.2	controllerType=0 controllerNumber=1 scan=13012	30.505
16205:2	1	S.MPLPPHP.G			394.712	2	788.417	788.412	0	6.1	17	Non	421.84	230.08	230.08	3.79	1278	>sp|P02817|AMELX_BOVIN Amelogenin, X isoform OS=Bos taurus OX=9913 GN=AMELX PE=1 SV=2	1	hf1_10472_ebo_28_1_261219.ScanId;v=1;d1=12805.12805.2	controllerType=0 controllerNumber=1 scan=12805	30.1527
15608:2	1	S.MPLPPHP.G			394.712	2	788.417	788.412	0	6.3	17	Non	422.15	234.1	234.1	4.01	1278	>sp|P02817|AMELX_BOVIN Amelogenin, X isoform OS=Bos taurus OX=9913 GN=AMELX PE=1 SV=2	1	hf1_10472_ebo_28_1_261219.ScanId;v=1;d1=12409.12409.2	controllerType=0 controllerNumber=1 scan=12409	29.4662
13298:2	1	S.M[+15.995]PLPPHP.G		M[+16]	402.709	2	804.412	804.407	0	5.4	17	Non	132.75	98.69	39.45	0.27	1278	>sp|P02817|AMELX_BOVIN Amelogenin, X isoform OS=Bos taurus OX=9913 GN=AMELX PE=1 SV=2	1	hf1_10472_ebo_28_1_261219.ScanId;v=1;d1=10883.10883.3	controllerType=0 controllerNumber=1 scan=10883	26.7987
00424:2	1	S.M[+15.995]PLPPHP.G		M[+16]	402.709	2	804.41	804.407	0	3.3	17	Non	191.92	191.92	40.94	2.23	1278	>sp|P02817|AMELX_BOVIN Amelogenin, X isoform OS=Bos taurus OX=9913 GN=AMELX PE=1 SV=2	1	hf1_10472_ebo_28_1_261219.ScanId;v=1;d1=1861.1861.3	controllerType=0 controllerNumber=1 scan=1861	10.0998
12624:2	1	S.M[+15.995]PLPPHP.G		M[+16]	402.709	2	804.412	804.407	0	5.5	17	Non	257.62	172.09	48.48	2.89	1278	>sp|P02817|AMELX_BOVIN Amelogenin, X isoform OS=Bos taurus OX=9913 GN=AMELX PE=1 SV=2	1	hf1_10472_ebo_28_1_261219.ScanId;v=1;d1=10423.10423.2	controllerType=0 controllerNumber=1 scan=10423	25.9917
12001:2	1	S.M[+15.995]PLPPHP.G		M[+16]	402.71	2	804.412	804.407	0	6.1	17	Non	368.75	221.89	82.87	3.53	1278	>sp|P02817|AMELX_BOVIN Amelogenin, X isoform OS=Bos taurus OX=9913 GN=AMELX PE=1 SV=2	1	hf1_10472_ebo_28_1_261219.ScanId;v=1;d1=9977.9977.2	controllerType=0 controllerNumber=1 scan=9977	25.2062
11697:2	1	S.M[+15.995]PLPPHP.G		M[+16]	402.71	2	804.412	804.407	0	5.8	17	Non	397.86	231.86	66.35	3.75	1278	>sp|P02817|AMELX_BOVIN Amelogenin, X isoform OS=Bos taurus OX=9913 GN=AMELX PE=1 SV=2	1	hf1_10472_ebo_28_1_261219.ScanId;v=1;d1=9772.9772.2	controllerType=0 controllerNumber=1 scan=9772	24.8483
09598:2	1	S.M[+15.995]PLPPHP.G		M[+16]	402.709	2	804.411	804.407	0	5.1	17	Non	405.46	212.61	82.1	3.96	1278	>sp|P02817|AMELX_BOVIN Amelogenin, X isoform OS=Bos taurus OX=9913 GN=AMELX PE=1 SV=2	1	hf1_10472_ebo_28_1_261219.ScanId;v=1;d1=8347.8347.2	controllerType=0 controllerNumber=1 scan=8347	22.3566
11360:2	1	S.M[+15.995]PLPPHP.G		M[+16]	402.709	2	804.412	804.407	0	5.5	17	Non	424.26	233.77	87.35	3.79	1278	>sp|P02817|AMELX_BOVIN Amelogenin, X isoform OS=Bos taurus OX=9913 GN=AMELX PE=1 SV=2	1	hf1_10472_ebo_28_1_261219.ScanId;v=1;d1=9541.9541.2	controllerType=0 controllerNumber=1 scan=9541	24.4421
09898:2	1	S.M[+15.995]PLPPHP.G		M[+16]	402.709	2	804.412	804.407	0	5.4	17	Non	431.01	280.91	97.86	4.07	1278	>sp|P02817|AMELX_BOVIN Amelogenin, X isoform OS=Bos taurus OX=9913 GN=AMELX PE=1 SV=2	1	hf1_10472_ebo_28_1_261219.ScanId;v=1;d1=8550.8550.2	controllerType=0 controllerNumber=1 scan=8550	22.7088
10488:2	1	S.M[+15.995]PLPPHP.G		M[+16]	402.71	2	804.413	804.407	0	6.5	17	Non	439.77	274.19	94.7	4.5	1278	>sp|P02817|AMELX_BOVIN Amelogenin, X isoform OS=Bos taurus OX=9913 GN=AMELX PE=1 SV=2	1	hf1_10472_ebo_28_1_261219.ScanId;v=1;d1=8946.8946.2	controllerType=0 controllerNumber=1 scan=8946	23.3986
10201:2	1	S.M[+15.995]PLPPHP.G		M[+16]	402.71	2	804.412	804.407	0	6.1	17	Non	440.12	260.82	92.99	4.22	1278	>sp|P02817|AMELX_BOVIN Amelogenin, X isoform OS=Bos taurus OX=9913 GN=AMELX PE=1 SV=2	1	hf1_10472_ebo_28_1_261219.ScanId;v=1;d1=8748.8748.2	controllerType=0 controllerNumber=1 scan=8748	23.0524
11073:2	1	S.M[+15.995]PLPPHP.G		M[+16]	402.709	2	804.412	804.407	0	5.5	17	Non	443.08	274.45	101.25	4.22	1278	>sp|P02817|AMELX_BOVIN Amelogenin, X isoform OS=Bos taurus OX=9913 GN=AMELX PE=1 SV=2	1	hf1_10472_ebo_28_1_261219.ScanId;v=1;d1=9339.9339.2	controllerType=0 controllerNumber=1 scan=9339	24.0903
10789:2	1	S.M[+15.995]PLPPHP.G		M[+16]	402.71	2	804.412	804.407	0	6	17	Non	444.71	265.19	99.68	4.22	1278	>sp|P02817|AMELX_BOVIN Amelogenin, X isoform OS=Bos taurus OX=9913 GN=AMELX PE=1 SV=2	1	hf1_10472_ebo_28_1_261219.ScanId;v=1;d1=9144.9144.2	controllerType=0 controllerNumber=1 scan=9144	23.7438
41128:2	1	S.MPLPPHPG.H			423.223	2	845.439	845.434	0	6.4	17	Non	12.01	12.01	12.01	0.92	1278	>sp|P02817|AMELX_BOVIN Amelogenin, X isoform OS=Bos taurus OX=9913 GN=AMELX PE=1 SV=2	1	hf1_10472_ebo_28_1_261219.ScanId;v=1;d1=29697.29697.2	controllerType=0 controllerNumber=1 scan=29697	59.5631
00331:2	1	S.MPLPPHPG.H			423.222	2	845.436	845.434	0	2.6	17	Non	20.39	20.39	20.39	0.38	1278	>sp|P02817|AMELX_BOVIN Amelogenin, X isoform OS=Bos taurus OX=9913 GN=AMELX PE=1 SV=2	1	hf1_10472_ebo_28_1_261219.ScanId;v=1;d1=1434.1434.2	controllerType=0 controllerNumber=1 scan=1434	7.8253
44813:2	1	S.MPLPPHPG.H			423.224	2	845.44	845.434	0	7	17	Non	30.96	30.96	30.96	0.92	1278	>sp|P02817|AMELX_BOVIN Amelogenin, X isoform OS=Bos taurus OX=9913 GN=AMELX PE=1 SV=2	1	hf1_10472_ebo_28_1_261219.ScanId;v=1;d1=32098.32098.2	controllerType=0 controllerNumber=1 scan=32098	63.8423
00352:2	1	S.MPLPPHPG.H			423.222	2	845.436	845.434	0	2.5	17	Non	33.85	33.85	33.85	0.38	1278	>sp|P02817|AMELX_BOVIN Amelogenin, X isoform OS=Bos taurus OX=9913 GN=AMELX PE=1 SV=2	1	hf1_10472_ebo_28_1_261219.ScanId;v=1;d1=1559.1559.2	controllerType=0 controllerNumber=1 scan=1559	8.5084
00272:2	1	S.MPLPPHPG.H			423.223	2	845.438	845.434	0	5	17	Non	38.21	38.21	38.21	0.72	1278	>sp|P02817|AMELX_BOVIN Amelogenin, X isoform OS=Bos taurus OX=9913 GN=AMELX PE=1 SV=2	1	hf1_10472_ebo_28_1_261219.ScanId;v=1;d1=1014.1014.2	controllerType=0 controllerNumber=1 scan=1014	5.4048
00365:2	1	S.MPLPPHPG.H			423.222	2	845.436	845.434	0	2.5	17	Non	43.58	43.58	43.58	0.39	1278	>sp|P02817|AMELX_BOVIN Amelogenin, X isoform OS=Bos taurus OX=9913 GN=AMELX PE=1 SV=2	1	hf1_10472_ebo_28_1_261219.ScanId;v=1;d1=1621.1621.2	controllerType=0 controllerNumber=1 scan=1621	8.8435
00264:2	1	S.MPLPPHPG.H			423.223	2	845.438	845.434	0	4.6	17	Non	46.6	46.6	46.6	0.73	1278	>sp|P02817|AMELX_BOVIN Amelogenin, X isoform OS=Bos taurus OX=9913 GN=AMELX PE=1 SV=2	1	hf1_10472_ebo_28_1_261219.ScanId;v=1;d1=955.955.2	controllerType=0 controllerNumber=1 scan=955	5.066
00249:2	1	S.MPLPPHPG.H			423.223	2	845.438	845.434	0	5.3	17	Non	57.37	57.37	57.37	0.73	1278	>sp|P02817|AMELX_BOVIN Amelogenin, X isoform OS=Bos taurus OX=9913 GN=AMELX PE=1 SV=2	1	hf1_10472_ebo_28_1_261219.ScanId;v=1;d1=883.883.2	controllerType=0 controllerNumber=1 scan=883	4.6584
00313:2	1	S.MPLPPHPG.H			423.222	2	845.436	845.434	0	2.7	17	Non	65.33	65.33	65.33	0.99	1278	>sp|P02817|AMELX_BOVIN Amelogenin, X isoform OS=Bos taurus OX=9913 GN=AMELX PE=1 SV=2	1	hf1_10472_ebo_28_1_261219.ScanId;v=1;d1=1327.1327.2	controllerType=0 controllerNumber=1 scan=1327	7.222
00295:2	1	S.MPLPPHPG.H			423.223	2	845.438	845.434	0	5.2	17	Non	85.31	85.31	85.31	1.34	1278	>sp|P02817|AMELX_BOVIN Amelogenin, X isoform OS=Bos taurus OX=9913 GN=AMELX PE=1 SV=2	1	hf1_10472_ebo_28_1_261219.ScanId;v=1;d1=1203.1203.2	controllerType=0 controllerNumber=1 scan=1203	6.512
41637:2	1	S.MPLPPHPG.H			423.223	2	845.439	845.434	0	6.5	17	Non	86.33	86.33	86.33	2.17	1278	>sp|P02817|AMELX_BOVIN Amelogenin, X isoform OS=Bos taurus OX=9913 GN=AMELX PE=1 SV=2	1	hf1_10472_ebo_28_1_261219.ScanId;v=1;d1=30026.30026.2	controllerType=0 controllerNumber=1 scan=30026	60.1477
00210:2	1	S.MPLPPHPG.H			423.223	2	845.438	845.434	0	4.6	17	Non	92.27	92.27	92.27	1.34	1278	>sp|P02817|AMELX_BOVIN Amelogenin, X isoform OS=Bos taurus OX=9913 GN=AMELX PE=1 SV=2	1	hf1_10472_ebo_28_1_261219.ScanId;v=1;d1=700.700.2	controllerType=0 controllerNumber=1 scan=700	3.6377
00342:2	1	S.MPLPPHPG.H			423.222	2	845.436	845.434	0	2.5	17	Non	92.62	92.62	92.62	1.1	1278	>sp|P02817|AMELX_BOVIN Amelogenin, X isoform OS=Bos taurus OX=9913 GN=AMELX PE=1 SV=2	1	hf1_10472_ebo_28_1_261219.ScanId;v=1;d1=1497.1497.2	controllerType=0 controllerNumber=1 scan=1497	8.1696
14101:2	1	S.MPLPPHPG.H			423.223	2	845.439	845.434	0	5.9	17	Non	99.29	99.29	99.29	0.27	1278	>sp|P02817|AMELX_BOVIN Amelogenin, X isoform OS=Bos taurus OX=9913 GN=AMELX PE=1 SV=2	1	hf1_10472_ebo_28_1_261219.ScanId;v=1;d1=11420.11420.3	controllerType=0 controllerNumber=1 scan=11420	27.7339
22699:2	1	S.MPLPPHPG.H			423.222	2	845.437	845.434	0	3.7	17	Non	108.02	108.02	108.02	0.2	1278	>sp|P02817|AMELX_BOVIN Amelogenin, X isoform OS=Bos taurus OX=9913 GN=AMELX PE=1 SV=2	1	hf1_10472_ebo_28_1_261219.ScanId;v=1;d1=17289.17289.2	controllerType=0 controllerNumber=1 scan=17289	37.8962
48097:2	1	S.MPLPPHPG.H			423.222	2	845.437	845.434	0	4	17	Non	108.73	108.73	108.73	1.67	1278	>sp|P02817|AMELX_BOVIN Amelogenin, X isoform OS=Bos taurus OX=9913 GN=AMELX PE=1 SV=2	1	hf1_10472_ebo_28_1_261219.ScanId;v=1;d1=34851.34851.2	controllerType=0 controllerNumber=1 scan=34851	70.4041
16125:2	1	S.MPLPPHPG.H			423.223	2	845.439	845.434	0	5.9	17	Non	112.42	112.42	112.42	0.95	1278	>sp|P02817|AMELX_BOVIN Amelogenin, X isoform OS=Bos taurus OX=9913 GN=AMELX PE=1 SV=2	1	hf1_10472_ebo_28_1_261219.ScanId;v=1;d1=12754.12754.3	controllerType=0 controllerNumber=1 scan=12754	30.0633
09800:2	1	S.MPLPPHPG.H			423.223	2	845.439	845.434	0	6.6	17	Non	121.43	105.92	105.92	0.38	1278	>sp|P02817|AMELX_BOVIN Amelogenin, X isoform OS=Bos taurus OX=9913 GN=AMELX PE=1 SV=2	1	hf1_10472_ebo_28_1_261219.ScanId;v=1;d1=8480.8480.2	controllerType=0 controllerNumber=1 scan=8480	22.5863
48479:2	1	S.MPLPPHPG.H			423.223	2	845.438	845.434	0	5	17	Non	144.27	144.27	144.27	2.18	1278	>sp|P02817|AMELX_BOVIN Amelogenin, X isoform OS=Bos taurus OX=9913 GN=AMELX PE=1 SV=2	1	hf1_10472_ebo_28_1_261219.ScanId;v=1;d1=35237.35237.2	controllerType=0 controllerNumber=1 scan=35237	71.5848
10712:2	1	S.MPLPPHPG.H			423.223	2	845.439	845.434	0	6.4	17	Non	145.19	145.19	145.19	1.14	1278	>sp|P02817|AMELX_BOVIN Amelogenin, X isoform OS=Bos taurus OX=9913 GN=AMELX PE=1 SV=2	1	hf1_10472_ebo_28_1_261219.ScanId;v=1;d1=9093.9093.2	controllerType=0 controllerNumber=1 scan=9093	23.6539
46793:2	1	S.MPLPPHPG.H			423.222	2	845.437	845.434	0	3.8	17	Non	146.47	146.47	146.47	2	1278	>sp|P02817|AMELX_BOVIN Amelogenin, X isoform OS=Bos taurus OX=9913 GN=AMELX PE=1 SV=2	1	hf1_10472_ebo_28_1_261219.ScanId;v=1;d1=33707.33707.2	controllerType=0 controllerNumber=1 scan=33707	67.2897
00237:2	1	S.MPLPPHPG.H			423.223	2	845.439	845.434	0	5.6	17	Non	148.65	148.65	148.65	2.22	1278	>sp|P02817|AMELX_BOVIN Amelogenin, X isoform OS=Bos taurus OX=9913 GN=AMELX PE=1 SV=2	1	hf1_10472_ebo_28_1_261219.ScanId;v=1;d1=822.822.2	controllerType=0 controllerNumber=1 scan=822	4.317
15183:2	1	S.MPLPPHPG.H			423.223	2	845.439	845.434	0	5.9	17	Non	162.78	162.78	162.78	2.17	1278	>sp|P02817|AMELX_BOVIN Amelogenin, X isoform OS=Bos taurus OX=9913 GN=AMELX PE=1 SV=2	1	hf1_10472_ebo_28_1_261219.ScanId;v=1;d1=12129.12129.2	controllerType=0 controllerNumber=1 scan=12129	28.9726
18337:2	1	S.MPLPPHPG.H			423.223	2	845.439	845.434	0	6	17	Non	172.89	160.83	160.83	1.04	1278	>sp|P02817|AMELX_BOVIN Amelogenin, X isoform OS=Bos taurus OX=9913 GN=AMELX PE=1 SV=2	1	hf1_10472_ebo_28_1_261219.ScanId;v=1;d1=14271.14271.2	controllerType=0 controllerNumber=1 scan=14271	32.6904
17561:2	1	S.MPLPPHPG.H			423.223	2	845.438	845.434	0	5.5	17	Non	183.92	157.09	157.09	1.04	1278	>sp|P02817|AMELX_BOVIN Amelogenin, X isoform OS=Bos taurus OX=9913 GN=AMELX PE=1 SV=2	1	hf1_10472_ebo_28_1_261219.ScanId;v=1;d1=13746.13746.3	controllerType=0 controllerNumber=1 scan=13746	31.7787
17190:2	1	S.MPLPPHPG.H			423.223	2	845.439	845.434	0	6.2	17	Non	190.18	190.18	190.18	2.17	1278	>sp|P02817|AMELX_BOVIN Amelogenin, X isoform OS=Bos taurus OX=9913 GN=AMELX PE=1 SV=2	1	hf1_10472_ebo_28_1_261219.ScanId;v=1;d1=13491.13491.2	controllerType=0 controllerNumber=1 scan=13491	31.3338
48609:2	1	S.MPLPPHPG.H			423.222	2	845.437	845.434	0	3.3	17	Non	192.19	192.19	192.19	2.42	1278	>sp|P02817|AMELX_BOVIN Amelogenin, X isoform OS=Bos taurus OX=9913 GN=AMELX PE=1 SV=2	1	hf1_10472_ebo_28_1_261219.ScanId;v=1;d1=35358.35358.2	controllerType=0 controllerNumber=1 scan=35358	71.9276
17151:2	1	S.MPLPPHPG.H			423.223	2	845.439	845.434	0	5.6	17	Non	205.01	204	204	2.35	1278	>sp|P02817|AMELX_BOVIN Amelogenin, X isoform OS=Bos taurus OX=9913 GN=AMELX PE=1 SV=2	1	hf1_10472_ebo_28_1_261219.ScanId;v=1;d1=13468.13468.3	controllerType=0 controllerNumber=1 scan=13468	31.2944
46916:2	1	S.MPLPPHPG.H			423.223	2	845.439	845.434	0	5.9	17	Non	223.56	223.56	223.56	2.52	1278	>sp|P02817|AMELX_BOVIN Amelogenin, X isoform OS=Bos taurus OX=9913 GN=AMELX PE=1 SV=2	1	hf1_10472_ebo_28_1_261219.ScanId;v=1;d1=33827.33827.2	controllerType=0 controllerNumber=1 scan=33827	67.656
47964:2	1	S.MPLPPHPG.H			423.222	2	845.437	845.434	0	4	17	Non	229.27	229.27	229.27	2.51	1278	>sp|P02817|AMELX_BOVIN Amelogenin, X isoform OS=Bos taurus OX=9913 GN=AMELX PE=1 SV=2	1	hf1_10472_ebo_28_1_261219.ScanId;v=1;d1=34734.34734.2	controllerType=0 controllerNumber=1 scan=34734	70.0644
47189:2	1	S.MPLPPHPG.H			423.223	2	845.438	845.434	0	4.7	17	Non	229.99	229.99	229.99	2.52	1278	>sp|P02817|AMELX_BOVIN Amelogenin, X isoform OS=Bos taurus OX=9913 GN=AMELX PE=1 SV=2	1	hf1_10472_ebo_28_1_261219.ScanId;v=1;d1=34062.34062.2	controllerType=0 controllerNumber=1 scan=34062	68.3402
16924:2	1	S.MPLPPHPG.H			423.223	2	845.438	845.434	0	5.4	17	Non	250.4	243.92	243.92	2.62	1278	>sp|P02817|AMELX_BOVIN Amelogenin, X isoform OS=Bos taurus OX=9913 GN=AMELX PE=1 SV=2	1	hf1_10472_ebo_28_1_261219.ScanId;v=1;d1=13316.13316.2	controllerType=0 controllerNumber=1 scan=13316	31.0348
47334:2	1	S.MPLPPHPG.H			423.222	2	845.437	845.434	0	4.1	17	Non	250.42	250.42	250.42	3.81	1278	>sp|P02817|AMELX_BOVIN Amelogenin, X isoform OS=Bos taurus OX=9913 GN=AMELX PE=1 SV=2	1	hf1_10472_ebo_28_1_261219.ScanId;v=1;d1=34188.34188.2	controllerType=0 controllerNumber=1 scan=34188	68.6842
12016:2	1	S.MPLPPHPG.H			423.223	2	845.439	845.434	0	6	17	Non	260.17	260.17	260.17	3.31	1278	>sp|P02817|AMELX_BOVIN Amelogenin, X isoform OS=Bos taurus OX=9913 GN=AMELX PE=1 SV=2	1	hf1_10472_ebo_28_1_261219.ScanId;v=1;d1=9986.9986.2	controllerType=0 controllerNumber=1 scan=9986	25.2185
47708:2	1	S.MPLPPHPG.H			423.222	2	845.437	845.434	0	3.6	17	Non	268.08	268.08	268.08	3.81	1278	>sp|P02817|AMELX_BOVIN Amelogenin, X isoform OS=Bos taurus OX=9913 GN=AMELX PE=1 SV=2	1	hf1_10472_ebo_28_1_261219.ScanId;v=1;d1=34498.34498.2	controllerType=0 controllerNumber=1 scan=34498	69.431
00922:2	1	S.MPLPPHPG.H			423.223	2	845.438	845.434	0	4.6	17	Non	268.45	268.45	268.45	3.88	1278	>sp|P02817|AMELX_BOVIN Amelogenin, X isoform OS=Bos taurus OX=9913 GN=AMELX PE=1 SV=2	1	hf1_10472_ebo_28_1_261219.ScanId;v=1;d1=2316.2316.2	controllerType=0 controllerNumber=1 scan=2316	11.462
01449:2	1	S.MPLPPHPG.H			423.222	2	845.437	845.434	0	3.9	17	Non	270.39	270.39	270.39	3.64	1278	>sp|P02817|AMELX_BOVIN Amelogenin, X isoform OS=Bos taurus OX=9913 GN=AMELX PE=1 SV=2	1	hf1_10472_ebo_28_1_261219.ScanId;v=1;d1=2733.2733.2	controllerType=0 controllerNumber=1 scan=2733	12.5133
16724:2	1	S.MPLPPHPG.H			423.222	2	845.437	845.434	0	3.3	17	Non	272.43	272.43	272.43	3.41	1278	>sp|P02817|AMELX_BOVIN Amelogenin, X isoform OS=Bos taurus OX=9913 GN=AMELX PE=1 SV=2	1	hf1_10472_ebo_28_1_261219.ScanId;v=1;d1=13173.13173.2	controllerType=0 controllerNumber=1 scan=13173	30.7876
47057:2	1	S.MPLPPHPG.H			423.223	2	845.438	845.434	0	5.2	17	Non	274.25	274.25	274.25	3.88	1278	>sp|P02817|AMELX_BOVIN Amelogenin, X isoform OS=Bos taurus OX=9913 GN=AMELX PE=1 SV=2	1	hf1_10472_ebo_28_1_261219.ScanId;v=1;d1=33946.33946.2	controllerType=0 controllerNumber=1 scan=33946	67.9991
01064:2	1	S.MPLPPHPG.H			423.223	2	845.438	845.434	0	4.6	17	Non	291.01	291.01	291.01	4.15	1278	>sp|P02817|AMELX_BOVIN Amelogenin, X isoform OS=Bos taurus OX=9913 GN=AMELX PE=1 SV=2	1	hf1_10472_ebo_28_1_261219.ScanId;v=1;d1=2436.2436.2	controllerType=0 controllerNumber=1 scan=2436	11.8033
01197:2	1	S.MPLPPHPG.H			423.223	2	845.439	845.434	0	5.8	17	Non	291.17	291.17	291.17	4.15	1278	>sp|P02817|AMELX_BOVIN Amelogenin, X isoform OS=Bos taurus OX=9913 GN=AMELX PE=1 SV=2	1	hf1_10472_ebo_28_1_261219.ScanId;v=1;d1=2550.2550.2	controllerType=0 controllerNumber=1 scan=2550	12.1458
14897:1	1	S.MPLPPHPG.H			845.44	1	845.44	845.434	0	7.5	17	Non	298.93	298.93	298.93	3.94	1278	>sp|P02817|AMELX_BOVIN Amelogenin, X isoform OS=Bos taurus OX=9913 GN=AMELX PE=1 SV=2	1	hf1_10472_ebo_28_1_261219.ScanId;v=1;d1=11937.11937.2	controllerType=0 controllerNumber=1 scan=11937	28.6421
00582:2	1	S.MPLPPHPG.H			423.222	2	845.437	845.434	0	4	17	Non	310.88	310.88	310.88	3.9	1278	>sp|P02817|AMELX_BOVIN Amelogenin, X isoform OS=Bos taurus OX=9913 GN=AMELX PE=1 SV=2	1	hf1_10472_ebo_28_1_261219.ScanId;v=1;d1=1990.1990.2	controllerType=0 controllerNumber=1 scan=1990	10.4228
14574:1	1	S.MPLPPHPG.H			845.44	1	845.44	845.434	0	6.8	17	Non	312.8	254.22	254.22	3.86	1278	>sp|P02817|AMELX_BOVIN Amelogenin, X isoform OS=Bos taurus OX=9913 GN=AMELX PE=1 SV=2	1	hf1_10472_ebo_28_1_261219.ScanId;v=1;d1=11735.11735.2	controllerType=0 controllerNumber=1 scan=11735	28.2904
47525:2	1	S.MPLPPHPG.H			423.222	2	845.437	845.434	0	4.3	17	Non	330.97	330.97	330.97	4.13	1278	>sp|P02817|AMELX_BOVIN Amelogenin, X isoform OS=Bos taurus OX=9913 GN=AMELX PE=1 SV=2	1	hf1_10472_ebo_28_1_261219.ScanId;v=1;d1=34346.34346.2	controllerType=0 controllerNumber=1 scan=34346	69.0848
16442:2	1	S.MPLPPHPG.H			423.222	2	845.437	845.434	0	3.9	17	Non	337.4	318.61	318.61	3.79	1278	>sp|P02817|AMELX_BOVIN Amelogenin, X isoform OS=Bos taurus OX=9913 GN=AMELX PE=1 SV=2	1	hf1_10472_ebo_28_1_261219.ScanId;v=1;d1=12962.12962.3	controllerType=0 controllerNumber=1 scan=12962	30.4177
00828:2	1	S.MPLPPHPG.H			423.222	2	845.437	845.434	0	4.3	17	Non	358.44	358.44	358.44	4.13	1278	>sp|P02817|AMELX_BOVIN Amelogenin, X isoform OS=Bos taurus OX=9913 GN=AMELX PE=1 SV=2	1	hf1_10472_ebo_28_1_261219.ScanId;v=1;d1=2217.2217.2	controllerType=0 controllerNumber=1 scan=2217	11.1115
00413:2	1	S.MPLPPHPG.H			423.222	2	845.436	845.434	0	2.6	17	Non	366.96	366.96	366.96	5.07	1278	>sp|P02817|AMELX_BOVIN Amelogenin, X isoform OS=Bos taurus OX=9913 GN=AMELX PE=1 SV=2	1	hf1_10472_ebo_28_1_261219.ScanId;v=1;d1=1851.1851.2	controllerType=0 controllerNumber=1 scan=1851	10.0822
00687:2	1	S.MPLPPHPG.H			423.222	2	845.437	845.434	0	3.8	17	Non	368.6	365.59	365.59	4.89	1278	>sp|P02817|AMELX_BOVIN Amelogenin, X isoform OS=Bos taurus OX=9913 GN=AMELX PE=1 SV=2	1	hf1_10472_ebo_28_1_261219.ScanId;v=1;d1=2098.2098.2	controllerType=0 controllerNumber=1 scan=2098	10.769
00033:2	1	S.MPLPPHPG.H			423.224	2	845.44	845.434	0	7.4	17	Non	381.27	342.28	342.28	4.54	1278	>sp|P02817|AMELX_BOVIN Amelogenin, X isoform OS=Bos taurus OX=9913 GN=AMELX PE=1 SV=2	1	hf1_10472_ebo_28_1_261219.ScanId;v=1;d1=114.114.2	controllerType=0 controllerNumber=1 scan=114	0.5452
14188:2	1	S.MPLPPHPG.H			423.223	2	845.438	845.434	0	5.6	17	Non	400.89	332.18	332.18	4.5	1278	>sp|P02817|AMELX_BOVIN Amelogenin, X isoform OS=Bos taurus OX=9913 GN=AMELX PE=1 SV=2	1	hf1_10472_ebo_28_1_261219.ScanId;v=1;d1=11476.11476.2	controllerType=0 controllerNumber=1 scan=11476	27.8339
15695:2	1	S.MPLPPHPG.H			423.223	2	845.439	845.434	0	6	17	Non	405.5	405.5	405.5	5.4	1278	>sp|P02817|AMELX_BOVIN Amelogenin, X isoform OS=Bos taurus OX=9913 GN=AMELX PE=1 SV=2	1	hf1_10472_ebo_28_1_261219.ScanId;v=1;d1=12464.12464.2	controllerType=0 controllerNumber=1 scan=12464	29.5621
15090:2	1	S.MPLPPHPG.H			423.223	2	845.439	845.434	0	5.6	17	Non	408.81	373.8	373.8	5.35	1278	>sp|P02817|AMELX_BOVIN Amelogenin, X isoform OS=Bos taurus OX=9913 GN=AMELX PE=1 SV=2	1	hf1_10472_ebo_28_1_261219.ScanId;v=1;d1=12069.12069.2	controllerType=0 controllerNumber=1 scan=12069	28.8699
14794:2	1	S.MPLPPHPG.H			423.224	2	845.44	845.434	0	7.4	17	Non	409.97	394.76	394.76	5.66	1278	>sp|P02817|AMELX_BOVIN Amelogenin, X isoform OS=Bos taurus OX=9913 GN=AMELX PE=1 SV=2	1	hf1_10472_ebo_28_1_261219.ScanId;v=1;d1=11871.11871.2	controllerType=0 controllerNumber=1 scan=11871	28.5283
15989:2	1	S.MPLPPHPG.H			423.223	2	845.438	845.434	0	5.1	17	Non	413.57	413.57	413.57	5.35	1278	>sp|P02817|AMELX_BOVIN Amelogenin, X isoform OS=Bos taurus OX=9913 GN=AMELX PE=1 SV=2	1	hf1_10472_ebo_28_1_261219.ScanId;v=1;d1=12662.12662.2	controllerType=0 controllerNumber=1 scan=12662	29.9068
15398:2	1	S.MPLPPHPG.H			423.223	2	845.438	845.434	0	4.6	17	Non	414.05	399.29	399.29	5.35	1278	>sp|P02817|AMELX_BOVIN Amelogenin, X isoform OS=Bos taurus OX=9913 GN=AMELX PE=1 SV=2	1	hf1_10472_ebo_28_1_261219.ScanId;v=1;d1=12269.12269.2	controllerType=0 controllerNumber=1 scan=12269	29.2194
14487:2	1	S.MPLPPHPG.H			423.223	2	845.439	845.434	0	6.1	17	Non	424.86	412.46	412.46	5.4	1278	>sp|P02817|AMELX_BOVIN Amelogenin, X isoform OS=Bos taurus OX=9913 GN=AMELX PE=1 SV=2	1	hf1_10472_ebo_28_1_261219.ScanId;v=1;d1=11675.11675.2	controllerType=0 controllerNumber=1 scan=11675	28.1863
48976:2	1	S.MP[+15.995]LPPHPG.H		P[+16]	431.22	2	861.433	861.429	0	4.6	17	Non	15	15	4	0.72	1278	>sp|P02817|AMELX_BOVIN Amelogenin, X isoform OS=Bos taurus OX=9913 GN=AMELX PE=1 SV=2	1	hf1_10472_ebo_28_1_261219.ScanId;v=1;d1=35737.35737.2	controllerType=0 controllerNumber=1 scan=35737	73.1596
00269:2	1	S.M[+15.995]PLPPHPG.H		M[+16]	431.221	2	861.434	861.429	0	5.7	17	Non	19.09	19.09	19.09	0.72	1278	>sp|P02817|AMELX_BOVIN Amelogenin, X isoform OS=Bos taurus OX=9913 GN=AMELX PE=1 SV=2	1	hf1_10472_ebo_28_1_261219.ScanId;v=1;d1=998.998.2	controllerType=0 controllerNumber=1 scan=998	5.3159
00373:2	1	S.M[+15.995]PLPPHPG.H		M[+16]	431.219	2	861.432	861.429	0	3.4	17	Non	49.41	49.41	29.02	0.39	1278	>sp|P02817|AMELX_BOVIN Amelogenin, X isoform OS=Bos taurus OX=9913 GN=AMELX PE=1 SV=2	1	hf1_10472_ebo_28_1_261219.ScanId;v=1;d1=1662.1662.2	controllerType=0 controllerNumber=1 scan=1662	9.0674
41345:2	1	S.MP[+15.995]LPPHPG.H		P[+16]	431.221	2	861.435	861.429	0	7.3	17	Non	57.04	57.04	4	0.92	1278	>sp|P02817|AMELX_BOVIN Amelogenin, X isoform OS=Bos taurus OX=9913 GN=AMELX PE=1 SV=2	1	hf1_10472_ebo_28_1_261219.ScanId;v=1;d1=29838.29838.2	controllerType=0 controllerNumber=1 scan=29838	59.8141
00244:2	1	S.MP[+15.995]LPPHPG.H		P[+16]	431.22	2	861.433	861.429	0	5.3	17	Non	59.33	59.33	4	1.04	1278	>sp|P02817|AMELX_BOVIN Amelogenin, X isoform OS=Bos taurus OX=9913 GN=AMELX PE=1 SV=2	1	hf1_10472_ebo_28_1_261219.ScanId;v=1;d1=876.876.2	controllerType=0 controllerNumber=1 scan=876	4.6242
00258:2	1	S.M[+15.995]PLPPHPG.H		M[+16]	431.22	2	861.433	861.429	0	4.8	17	Non	60.15	60.15	28.51	1.04	1278	>sp|P02817|AMELX_BOVIN Amelogenin, X isoform OS=Bos taurus OX=9913 GN=AMELX PE=1 SV=2	1	hf1_10472_ebo_28_1_261219.ScanId;v=1;d1=937.937.2	controllerType=0 controllerNumber=1 scan=937	4.965
00337:2	1	S.M[+15.995]PLPPHPG.H		M[+16]	431.219	2	861.431	861.429	0	3.1	17	Non	61.91	61.91	30.79	0.99	1278	>sp|P02817|AMELX_BOVIN Amelogenin, X isoform OS=Bos taurus OX=9913 GN=AMELX PE=1 SV=2	1	hf1_10472_ebo_28_1_261219.ScanId;v=1;d1=1476.1476.2	controllerType=0 controllerNumber=1 scan=1476	8.0563
41802:2	1	S.MP[+15.995]LPPHPG.H		P[+16]	431.221	2	861.436	861.429	0	7.8	17	Non	73.02	73.02	4	1.13	1278	>sp|P02817|AMELX_BOVIN Amelogenin, X isoform OS=Bos taurus OX=9913 GN=AMELX PE=1 SV=2	1	hf1_10472_ebo_28_1_261219.ScanId;v=1;d1=30134.30134.2	controllerType=0 controllerNumber=1 scan=30134	60.3401
00317:2	1	S.MP[+15.995]LPPHPG.H		P[+16]	431.219	2	861.431	861.429	0	3.1	17	Non	86.8	86.8	4	1.1	1278	>sp|P02817|AMELX_BOVIN Amelogenin, X isoform OS=Bos taurus OX=9913 GN=AMELX PE=1 SV=2	1	hf1_10472_ebo_28_1_261219.ScanId;v=1;d1=1352.1352.2	controllerType=0 controllerNumber=1 scan=1352	7.3629
00111:2	1	S.M[+15.995]PLPPHPG.H		M[+16]	431.221	2	861.434	861.429	0	6.5	17	Non	91.1	91.1	29.27	2.17	1278	>sp|P02817|AMELX_BOVIN Amelogenin, X isoform OS=Bos taurus OX=9913 GN=AMELX PE=1 SV=2	1	hf1_10472_ebo_28_1_261219.ScanId;v=1;d1=473.473.2	controllerType=0 controllerNumber=1 scan=473	2.524
00309:2	1	S.MP[+15.995]LPPHPG.H		P[+16]	431.219	2	861.432	861.429	0	3.3	17	Non	101.76	101.76	4	1.1	1278	>sp|P02817|AMELX_BOVIN Amelogenin, X isoform OS=Bos taurus OX=9913 GN=AMELX PE=1 SV=2	1	hf1_10472_ebo_28_1_261219.ScanId;v=1;d1=1293.1293.2	controllerType=0 controllerNumber=1 scan=1293	7.0262
00220:2	1	S.M[+15.995]PLPPHPG.H		M[+16]	431.22	2	861.433	861.429	0	5.2	17	Non	108.55	108.55	28.62	2.17	1278	>sp|P02817|AMELX_BOVIN Amelogenin, X isoform OS=Bos taurus OX=9913 GN=AMELX PE=1 SV=2	1	hf1_10472_ebo_28_1_261219.ScanId;v=1;d1=755.755.2	controllerType=0 controllerNumber=1 scan=755	3.9452
47298:2	1	S.M[+15.995]PLPPHPG.H		M[+16]	431.22	2	861.433	861.429	0	4.4	17	Non	119.42	119.42	26.39	2.17	1278	>sp|P02817|AMELX_BOVIN Amelogenin, X isoform OS=Bos taurus OX=9913 GN=AMELX PE=1 SV=2	1	hf1_10472_ebo_28_1_261219.ScanId;v=1;d1=34158.34158.2	controllerType=0 controllerNumber=1 scan=34158	68.6054
09748:1	1	S.M[+15.995]PLPPHPG.H		M[+16]	861.435	1	861.435	861.429	0	7.6	17	Non	139.52	139.52	33.03	1.11	1278	>sp|P02817|AMELX_BOVIN Amelogenin, X isoform OS=Bos taurus OX=9913 GN=AMELX PE=1 SV=2	1	hf1_10472_ebo_28_1_261219.ScanId;v=1;d1=8448.8448.3	controllerType=0 controllerNumber=1 scan=8448	22.5304
14670:2	1	S.M[+15.995]PLPPHPG.H		M[+16]	431.221	2	861.434	861.429	0	6.2	17	Non	174.75	144.51	49.82	2.18	1278	>sp|P02817|AMELX_BOVIN Amelogenin, X isoform OS=Bos taurus OX=9913 GN=AMELX PE=1 SV=2	1	hf1_10472_ebo_28_1_261219.ScanId;v=1;d1=11795.11795.3	controllerType=0 controllerNumber=1 scan=11795	28.3933
47095:2	1	S.M[+15.995]PLPPHPG.H		M[+16]	431.22	2	861.433	861.429	0	5.3	17	Non	230.76	230.76	78.38	2.81	1278	>sp|P02817|AMELX_BOVIN Amelogenin, X isoform OS=Bos taurus OX=9913 GN=AMELX PE=1 SV=2	1	hf1_10472_ebo_28_1_261219.ScanId;v=1;d1=33982.33982.2	controllerType=0 controllerNumber=1 scan=33982	68.1091
00580:2	1	S.M[+15.995]PLPPHPG.H		M[+16]	431.22	2	861.433	861.429	0	4.5	17	Non	253.02	253.02	53.48	4.11	1278	>sp|P02817|AMELX_BOVIN Amelogenin, X isoform OS=Bos taurus OX=9913 GN=AMELX PE=1 SV=2	1	hf1_10472_ebo_28_1_261219.ScanId;v=1;d1=1989.1989.2	controllerType=0 controllerNumber=1 scan=1989	10.4213
47523:2	1	S.M[+15.995]PLPPHPG.H		M[+16]	431.22	2	861.433	861.429	0	4.5	17	Non	287.65	287.65	52.73	4.15	1278	>sp|P02817|AMELX_BOVIN Amelogenin, X isoform OS=Bos taurus OX=9913 GN=AMELX PE=1 SV=2	1	hf1_10472_ebo_28_1_261219.ScanId;v=1;d1=34345.34345.2	controllerType=0 controllerNumber=1 scan=34345	69.0834
00827:2	1	S.M[+15.995]PLPPHPG.H		M[+16]	431.22	2	861.433	861.429	0	4.6	17	Non	304.84	302.79	81.2	4.15	1278	>sp|P02817|AMELX_BOVIN Amelogenin, X isoform OS=Bos taurus OX=9913 GN=AMELX PE=1 SV=2	1	hf1_10472_ebo_28_1_261219.ScanId;v=1;d1=2216.2216.2	controllerType=0 controllerNumber=1 scan=2216	11.11
01194:2	1	S.M[+15.995]PLPPHPG.H		M[+16]	431.221	2	861.434	861.429	0	6	17	Non	308.47	308.47	81.05	4.82	1278	>sp|P02817|AMELX_BOVIN Amelogenin, X isoform OS=Bos taurus OX=9913 GN=AMELX PE=1 SV=2	1	hf1_10472_ebo_28_1_261219.ScanId;v=1;d1=2546.2546.2	controllerType=0 controllerNumber=1 scan=2546	12.1278
00917:2	1	S.M[+15.995]PLPPHPG.H		M[+16]	431.22	2	861.433	861.429	0	4.9	17	Non	309.31	309.31	48.73	4.82	1278	>sp|P02817|AMELX_BOVIN Amelogenin, X isoform OS=Bos taurus OX=9913 GN=AMELX PE=1 SV=2	1	hf1_10472_ebo_28_1_261219.ScanId;v=1;d1=2312.2312.2	controllerType=0 controllerNumber=1 scan=2312	11.4504
01061:2	1	S.M[+15.995]PLPPHPG.H		M[+16]	431.22	2	861.433	861.429	0	5.3	17	Non	358.4	358.4	78.37	5.06	1278	>sp|P02817|AMELX_BOVIN Amelogenin, X isoform OS=Bos taurus OX=9913 GN=AMELX PE=1 SV=2	1	hf1_10472_ebo_28_1_261219.ScanId;v=1;d1=2433.2433.2	controllerType=0 controllerNumber=1 scan=2433	11.7933
11466:2	1	S.M[+15.995]PLPPHPG.H		M[+16]	431.221	2	861.434	861.429	0	6.4	17	Non	391.55	306.42	76.93	4.14	1278	>sp|P02817|AMELX_BOVIN Amelogenin, X isoform OS=Bos taurus OX=9913 GN=AMELX PE=1 SV=2	1	hf1_10472_ebo_28_1_261219.ScanId;v=1;d1=9613.9613.2	controllerType=0 controllerNumber=1 scan=9613	24.5706
11181:2	1	S.M[+15.995]PLPPHPG.H		M[+16]	431.22	2	861.433	861.429	0	5.5	17	Non	405.72	330.5	93.84	4.5	1278	>sp|P02817|AMELX_BOVIN Amelogenin, X isoform OS=Bos taurus OX=9913 GN=AMELX PE=1 SV=2	1	hf1_10472_ebo_28_1_261219.ScanId;v=1;d1=9416.9416.2	controllerType=0 controllerNumber=1 scan=9416	24.2211
00685:2	1	S.M[+15.995]PLPPHPG.H		M[+16]	431.22	2	861.432	861.429	0	4.1	17	Non	410.36	349.05	82.52	4.3	1278	>sp|P02817|AMELX_BOVIN Amelogenin, X isoform OS=Bos taurus OX=9913 GN=AMELX PE=1 SV=2	1	hf1_10472_ebo_28_1_261219.ScanId;v=1;d1=2096.2096.2	controllerType=0 controllerNumber=1 scan=2096	10.766
00032:2	1	S.M[+15.995]PLPPHPG.H		M[+16]	431.221	2	861.435	861.429	0	7.6	17	Non	418.19	363.02	88	5.61	1278	>sp|P02817|AMELX_BOVIN Amelogenin, X isoform OS=Bos taurus OX=9913 GN=AMELX PE=1 SV=2	1	hf1_10472_ebo_28_1_261219.ScanId;v=1;d1=113.113.2	controllerType=0 controllerNumber=1 scan=113	0.5438
09411:2	1	S.M[+15.995]PLPPHPG.H		M[+16]	431.22	2	861.433	861.429	0	5.3	17	Non	418.83	340.7	89.65	4.5	1278	>sp|P02817|AMELX_BOVIN Amelogenin, X isoform OS=Bos taurus OX=9913 GN=AMELX PE=1 SV=2	1	hf1_10472_ebo_28_1_261219.ScanId;v=1;d1=8221.8221.2	controllerType=0 controllerNumber=1 scan=8221	22.1369
10604:2	1	S.M[+15.995]PLPPHPG.H		M[+16]	431.221	2	861.435	861.429	0	6.8	17	Non	425.26	390.72	100.08	5.66	1278	>sp|P02817|AMELX_BOVIN Amelogenin, X isoform OS=Bos taurus OX=9913 GN=AMELX PE=1 SV=2	1	hf1_10472_ebo_28_1_261219.ScanId;v=1;d1=9023.9023.2	controllerType=0 controllerNumber=1 scan=9023	23.5333
09110:2	1	S.M[+15.995]PLPPHPG.H		M[+16]	431.221	2	861.434	861.429	0	6.6	17	Non	429.22	373.32	100.99	5.61	1278	>sp|P02817|AMELX_BOVIN Amelogenin, X isoform OS=Bos taurus OX=9913 GN=AMELX PE=1 SV=2	1	hf1_10472_ebo_28_1_261219.ScanId;v=1;d1=8023.8023.2	controllerType=0 controllerNumber=1 scan=8023	21.7932
09715:2	1	S.M[+15.995]PLPPHPG.H		M[+16]	431.221	2	861.435	861.429	0	7	17	Non	437.26	378.6	105.34	5.61	1278	>sp|P02817|AMELX_BOVIN Amelogenin, X isoform OS=Bos taurus OX=9913 GN=AMELX PE=1 SV=2	1	hf1_10472_ebo_28_1_261219.ScanId;v=1;d1=8424.8424.2	controllerType=0 controllerNumber=1 scan=8424	22.4894
10312:2	1	S.M[+15.995]PLPPHPG.H		M[+16]	431.221	2	861.435	861.429	0	7.6	17	Non	445.13	400.32	98.81	5.59	1278	>sp|P02817|AMELX_BOVIN Amelogenin, X isoform OS=Bos taurus OX=9913 GN=AMELX PE=1 SV=2	1	hf1_10472_ebo_28_1_261219.ScanId;v=1;d1=8825.8825.2	controllerType=0 controllerNumber=1 scan=8825	23.1873
08817:2	1	S.M[+15.995]PLPPHPG.H		M[+16]	431.221	2	861.434	861.429	0	5.8	17	Non	446.61	377.26	97.08	5.38	1278	>sp|P02817|AMELX_BOVIN Amelogenin, X isoform OS=Bos taurus OX=9913 GN=AMELX PE=1 SV=2	1	hf1_10472_ebo_28_1_261219.ScanId;v=1;d1=7825.7825.2	controllerType=0 controllerNumber=1 scan=7825	21.4486
00412:2	1	S.M[+15.995]PLPPHPG.H		M[+16]	431.219	2	861.431	861.429	0	2.8	17	Non	446.82	395.28	99.8	5.08	1278	>sp|P02817|AMELX_BOVIN Amelogenin, X isoform OS=Bos taurus OX=9913 GN=AMELX PE=1 SV=2	1	hf1_10472_ebo_28_1_261219.ScanId;v=1;d1=1850.1850.2	controllerType=0 controllerNumber=1 scan=1850	10.0807
10014:2	1	S.M[+15.995]PLPPHPG.H		M[+16]	431.221	2	861.435	861.429	0	6.8	17	Non	455.1	389.36	101.92	5.59	1278	>sp|P02817|AMELX_BOVIN Amelogenin, X isoform OS=Bos taurus OX=9913 GN=AMELX PE=1 SV=2	1	hf1_10472_ebo_28_1_261219.ScanId;v=1;d1=8627.8627.2	controllerType=0 controllerNumber=1 scan=8627	22.8419
12219:2	1	S.MPLPPHPGH.P			491.752	2	982.497	982.493	0	4	17	Non	400.67	346.43	346.43	4.51	1278	>sp|P02817|AMELX_BOVIN Amelogenin, X isoform OS=Bos taurus OX=9913 GN=AMELX PE=1 SV=2	1	hf1_10472_ebo_28_1_261219.ScanId;v=1;d1=10134.10134.2	controllerType=0 controllerNumber=1 scan=10134	25.4817
11592:2	1	S.MPLPPHPGH.P			491.752	2	982.497	982.493	0	4.7	17	Non	503.2	407.32	407.32	5.86	1278	>sp|P02817|AMELX_BOVIN Amelogenin, X isoform OS=Bos taurus OX=9913 GN=AMELX PE=1 SV=2	1	hf1_10472_ebo_28_1_261219.ScanId;v=1;d1=9698.9698.2	controllerType=0 controllerNumber=1 scan=9698	24.7189
11888:2	1	S.MPLPPHPGH.P			491.753	2	982.499	982.493	0	6	17	Non	529.79	421.34	421.34	6.64	1278	>sp|P02817|AMELX_BOVIN Amelogenin, X isoform OS=Bos taurus OX=9913 GN=AMELX PE=1 SV=2	1	hf1_10472_ebo_28_1_261219.ScanId;v=1;d1=9900.9900.2	controllerType=0 controllerNumber=1 scan=9900	25.0728
11294:2	1	S.MPLPPHPGH.P			491.752	2	982.498	982.493	0	5	17	Non	584.83	457.88	457.88	7.43	1278	>sp|P02817|AMELX_BOVIN Amelogenin, X isoform OS=Bos taurus OX=9913 GN=AMELX PE=1 SV=2	1	hf1_10472_ebo_28_1_261219.ScanId;v=1;d1=9496.9496.2	controllerType=0 controllerNumber=1 scan=9496	24.3648
11012:2	1	S.MPLPPHPGH.P			491.753	2	982.498	982.493	0	5.6	17	Non	601.59	485.75	485.75	8.43	1278	>sp|P02817|AMELX_BOVIN Amelogenin, X isoform OS=Bos taurus OX=9913 GN=AMELX PE=1 SV=2	1	hf1_10472_ebo_28_1_261219.ScanId;v=1;d1=9298.9298.2	controllerType=0 controllerNumber=1 scan=9298	24.0154
10675:2	1	S.MPLPPHPGH.P			491.753	2	982.499	982.493	0	6.2	17	Non	601.9	473.08	473.08	8.43	1278	>sp|P02817|AMELX_BOVIN Amelogenin, X isoform OS=Bos taurus OX=9913 GN=AMELX PE=1 SV=2	1	hf1_10472_ebo_28_1_261219.ScanId;v=1;d1=9067.9067.2	controllerType=0 controllerNumber=1 scan=9067	23.6099
07614:2	1	S.M[+15.995]PLPPHPGH.P		M[+16]	499.75	2	998.493	998.488	0	5.1	17	Non	387.91	340.69	71.26	4.91	1278	>sp|P02817|AMELX_BOVIN Amelogenin, X isoform OS=Bos taurus OX=9913 GN=AMELX PE=1 SV=2	1	hf1_10472_ebo_28_1_261219.ScanId;v=1;d1=7001.7001.2	controllerType=0 controllerNumber=1 scan=7001	20.0172
07311:2	1	S.M[+15.995]PLPPHPGH.P		M[+16]	499.75	2	998.493	998.488	0	5.4	17	Non	425.06	421.12	97.37	5.85	1278	>sp|P02817|AMELX_BOVIN Amelogenin, X isoform OS=Bos taurus OX=9913 GN=AMELX PE=1 SV=2	1	hf1_10472_ebo_28_1_261219.ScanId;v=1;d1=6797.6797.2	controllerType=0 controllerNumber=1 scan=6797	19.6641
07003:2	1	S.M[+15.995]PLPPHPGH.P		M[+16]	499.75	2	998.493	998.488	0	5.8	17	Non	443.92	443.92	79.4	5.83	1278	>sp|P02817|AMELX_BOVIN Amelogenin, X isoform OS=Bos taurus OX=9913 GN=AMELX PE=1 SV=2	1	hf1_10472_ebo_28_1_261219.ScanId;v=1;d1=6594.6594.2	controllerType=0 controllerNumber=1 scan=6594	19.3092
06445:2	1	S.M[+15.995]PLPPHPGH.P		M[+16]	499.75	2	998.492	998.488	0	4.4	17	Non	481.89	423.46	82.32	5.86	1278	>sp|P02817|AMELX_BOVIN Amelogenin, X isoform OS=Bos taurus OX=9913 GN=AMELX PE=1 SV=2	1	hf1_10472_ebo_28_1_261219.ScanId;v=1;d1=6204.6204.2	controllerType=0 controllerNumber=1 scan=6204	18.6216
05883:2	1	S.M[+15.995]PLPPHPGH.P		M[+16]	499.75	2	998.494	998.488	0	6	17	Non	509.49	444.72	93.47	5.91	1278	>sp|P02817|AMELX_BOVIN Amelogenin, X isoform OS=Bos taurus OX=9913 GN=AMELX PE=1 SV=2	1	hf1_10472_ebo_28_1_261219.ScanId;v=1;d1=5818.5818.2	controllerType=0 controllerNumber=1 scan=5818	17.9347
06179:2	1	S.M[+15.995]PLPPHPGH.P		M[+16]	499.75	2	998.492	998.488	0	4.8	17	Non	517.45	462.78	96.26	5.91	1278	>sp|P02817|AMELX_BOVIN Amelogenin, X isoform OS=Bos taurus OX=9913 GN=AMELX PE=1 SV=2	1	hf1_10472_ebo_28_1_261219.ScanId;v=1;d1=6016.6016.2	controllerType=0 controllerNumber=1 scan=6016	18.2832
06721:2	1	S.M[+15.995]PLPPHPGH.P		M[+16]	499.75	2	998.493	998.488	0	5.4	17	Non	522.02	432.74	97.77	6.64	1278	>sp|P02817|AMELX_BOVIN Amelogenin, X isoform OS=Bos taurus OX=9913 GN=AMELX PE=1 SV=2	1	hf1_10472_ebo_28_1_261219.ScanId;v=1;d1=6396.6396.2	controllerType=0 controllerNumber=1 scan=6396	18.9651
05591:2	1	S.M[+15.995]PLPPHPGH.P		M[+16]	499.75	2	998.493	998.488	0	5.8	17	Non	529.23	467.44	113.72	5.96	1278	>sp|P02817|AMELX_BOVIN Amelogenin, X isoform OS=Bos taurus OX=9913 GN=AMELX PE=1 SV=2	1	hf1_10472_ebo_28_1_261219.ScanId;v=1;d1=5620.5620.2	controllerType=0 controllerNumber=1 scan=5620	17.5842
11980:2	1	S.MPLPPHPGHP.G			540.28	2	1079.55	1079.55	0	6.7	17	Non	441.57	298.74	298.74	5.01	1278	>sp|P02817|AMELX_BOVIN Amelogenin, X isoform OS=Bos taurus OX=9913 GN=AMELX PE=1 SV=2	1	hf1_10472_ebo_28_1_261219.ScanId;v=1;d1=9962.9962.2	controllerType=0 controllerNumber=1 scan=9962	25.1786
13111:2	1	S.MPLPPHPGHP.G			540.28	2	1079.55	1079.55	0	6	17	Non	539.32	450.37	450.37	6.64	1278	>sp|P02817|AMELX_BOVIN Amelogenin, X isoform OS=Bos taurus OX=9913 GN=AMELX PE=1 SV=2	1	hf1_10472_ebo_28_1_261219.ScanId;v=1;d1=10754.10754.2	controllerType=0 controllerNumber=1 scan=10754	26.5733
12813:2	1	S.MPLPPHPGHP.G			540.28	2	1079.55	1079.55	0	6.3	17	Non	569.02	377.99	377.99	7.43	1278	>sp|P02817|AMELX_BOVIN Amelogenin, X isoform OS=Bos taurus OX=9913 GN=AMELX PE=1 SV=2	1	hf1_10472_ebo_28_1_261219.ScanId;v=1;d1=10552.10552.2	controllerType=0 controllerNumber=1 scan=10552	26.2235
12517:2	1	S.MPLPPHPGHP.G			540.279	2	1079.55	1079.55	0	5.7	17	Non	601.39	381.41	381.41	8.43	1278	>sp|P02817|AMELX_BOVIN Amelogenin, X isoform OS=Bos taurus OX=9913 GN=AMELX PE=1 SV=2	1	hf1_10472_ebo_28_1_261219.ScanId;v=1;d1=10354.10354.2	controllerType=0 controllerNumber=1 scan=10354	25.8739
12251:2	1	S.MPLPPHPGHP.G			540.279	2	1079.55	1079.55	0	4.3	17	Non	621.14	426.21	426.21	8.18	1278	>sp|P02817|AMELX_BOVIN Amelogenin, X isoform OS=Bos taurus OX=9913 GN=AMELX PE=1 SV=2	1	hf1_10472_ebo_28_1_261219.ScanId;v=1;d1=10158.10158.2	controllerType=0 controllerNumber=1 scan=10158	25.5258
07178:2	1	S.M[+15.995]PLPPHPGHP.G		M[+16]	548.278	2	1095.55	1095.54	0	7.3	17	Non	172.35	172.35	9.71	2.62	1278	>sp|P02817|AMELX_BOVIN Amelogenin, X isoform OS=Bos taurus OX=9913 GN=AMELX PE=1 SV=2	1	hf1_10472_ebo_28_1_261219.ScanId;v=1;d1=6711.6711.2	controllerType=0 controllerNumber=1 scan=6711	19.5139
08466:2	1	S.M[+15.995]PLPPHPGHP.G		M[+16]	548.277	2	1095.55	1095.54	0	5.9	17	Non	500.11	381.52	58.87	5.91	1278	>sp|P02817|AMELX_BOVIN Amelogenin, X isoform OS=Bos taurus OX=9913 GN=AMELX PE=1 SV=2	1	hf1_10472_ebo_28_1_261219.ScanId;v=1;d1=7584.7584.2	controllerType=0 controllerNumber=1 scan=7584	21.028
07817:2	1	S.M[+15.995]PLPPHPGHP.G		M[+16]	548.277	2	1095.55	1095.54	0	5.6	17	Non	559.09	355.48	62.56	5.79	1278	>sp|P02817|AMELX_BOVIN Amelogenin, X isoform OS=Bos taurus OX=9913 GN=AMELX PE=1 SV=2	1	hf1_10472_ebo_28_1_261219.ScanId;v=1;d1=7144.7144.2	controllerType=0 controllerNumber=1 scan=7144	20.2643
00306:3	1	S.MPLPPHPGHPG.Y			379.529	3	1136.57	1136.57	0	3.4	17	Non	7.7	7.7	7.7	0.91	1278	>sp|P02817|AMELX_BOVIN Amelogenin, X isoform OS=Bos taurus OX=9913 GN=AMELX PE=1 SV=2	1	hf1_10472_ebo_28_1_261219.ScanId;v=1;d1=1274.1274.3	controllerType=0 controllerNumber=1 scan=1274	6.9184
00335:3	1	S.MPLPPHPGHPG.Y			379.528	3	1136.57	1136.57	0	2.8	17	Non	14.39	14.39	14.39	0.91	1278	>sp|P02817|AMELX_BOVIN Amelogenin, X isoform OS=Bos taurus OX=9913 GN=AMELX PE=1 SV=2	1	hf1_10472_ebo_28_1_261219.ScanId;v=1;d1=1458.1458.3	controllerType=0 controllerNumber=1 scan=1458	7.9563
00238:3	1	S.MPLPPHPGHPG.Y			379.529	3	1136.57	1136.57	0	5.8	17	Non	15.97	15.97	15.97	0.96	1278	>sp|P02817|AMELX_BOVIN Amelogenin, X isoform OS=Bos taurus OX=9913 GN=AMELX PE=1 SV=2	1	hf1_10472_ebo_28_1_261219.ScanId;v=1;d1=833.833.3	controllerType=0 controllerNumber=1 scan=833	4.3807
00376:3	1	S.MPLPPHPGHPG.Y			379.528	3	1136.57	1136.57	0	2.8	17	Non	23.72	23.72	23.72	0.91	1278	>sp|P02817|AMELX_BOVIN Amelogenin, X isoform OS=Bos taurus OX=9913 GN=AMELX PE=1 SV=2	1	hf1_10472_ebo_28_1_261219.ScanId;v=1;d1=1676.1676.3	controllerType=0 controllerNumber=1 scan=1676	9.1461
00212:3	1	S.MPLPPHPGHPG.Y			379.529	3	1136.57	1136.57	0	4.6	17	Non	32.62	32.62	32.62	1.44	1278	>sp|P02817|AMELX_BOVIN Amelogenin, X isoform OS=Bos taurus OX=9913 GN=AMELX PE=1 SV=2	1	hf1_10472_ebo_28_1_261219.ScanId;v=1;d1=704.704.3	controllerType=0 controllerNumber=1 scan=704	3.6546
00361:3	1	S.MPLPPHPGHPG.Y			379.528	3	1136.57	1136.57	0	2.4	17	Non	58.5	58.5	58.5	0.95	1278	>sp|P02817|AMELX_BOVIN Amelogenin, X isoform OS=Bos taurus OX=9913 GN=AMELX PE=1 SV=2	1	hf1_10472_ebo_28_1_261219.ScanId;v=1;d1=1611.1611.3	controllerType=0 controllerNumber=1 scan=1611	8.7936
01575:3	1	S.MPLPPHPGHPG.Y			379.53	3	1136.57	1136.57	0	6.3	17	Non	100.85	100.85	100.85	2.18	1278	>sp|P02817|AMELX_BOVIN Amelogenin, X isoform OS=Bos taurus OX=9913 GN=AMELX PE=1 SV=2	1	hf1_10472_ebo_28_1_261219.ScanId;v=1;d1=2829.2829.7	controllerType=0 controllerNumber=1 scan=2829	12.6842
00319:3	1	S.MPLPPHPGHPG.Y			379.528	3	1136.57	1136.57	0	2.4	17	Non	105.49	105.49	105.49	1.3	1278	>sp|P02817|AMELX_BOVIN Amelogenin, X isoform OS=Bos taurus OX=9913 GN=AMELX PE=1 SV=2	1	hf1_10472_ebo_28_1_261219.ScanId;v=1;d1=1361.1361.3	controllerType=0 controllerNumber=1 scan=1361	7.4142
00250:3	1	S.MPLPPHPGHPG.Y			379.529	3	1136.57	1136.57	0	4.7	17	Non	128.08	128.08	128.08	2.34	1278	>sp|P02817|AMELX_BOVIN Amelogenin, X isoform OS=Bos taurus OX=9913 GN=AMELX PE=1 SV=2	1	hf1_10472_ebo_28_1_261219.ScanId;v=1;d1=901.901.3	controllerType=0 controllerNumber=1 scan=901	4.7641
00228:3	1	S.MPLPPHPGHPG.Y			379.529	3	1136.57	1136.57	0	5.3	17	Non	135.23	135.23	135.23	2.44	1278	>sp|P02817|AMELX_BOVIN Amelogenin, X isoform OS=Bos taurus OX=9913 GN=AMELX PE=1 SV=2	1	hf1_10472_ebo_28_1_261219.ScanId;v=1;d1=767.767.3	controllerType=0 controllerNumber=1 scan=767	4.0006
47210:3	1	S.MPLPPHPGHPG.Y			379.529	3	1136.57	1136.57	0	4.7	17	Non	146.54	146.54	146.54	2.44	1278	>sp|P02817|AMELX_BOVIN Amelogenin, X isoform OS=Bos taurus OX=9913 GN=AMELX PE=1 SV=2	1	hf1_10472_ebo_28_1_261219.ScanId;v=1;d1=34081.34081.3	controllerType=0 controllerNumber=1 scan=34081	68.389
12639:2	1	S.MPLPPHPGHPG.Y			568.786	2	1136.56	1136.57	0	-2.6	17	Non	177.49	177.49	177.49	2.19	1278	>sp|P02817|AMELX_BOVIN Amelogenin, X isoform OS=Bos taurus OX=9913 GN=AMELX PE=1 SV=2	1	hf1_10472_ebo_28_1_261219.ScanId;v=1;d1=10433.10433.2	controllerType=0 controllerNumber=1 scan=10433	26.0091
47061:3	1	S.MPLPPHPGHPG.Y			379.529	3	1136.57	1136.57	0	5	17	Non	189.53	189.53	189.53	3.07	1278	>sp|P02817|AMELX_BOVIN Amelogenin, X isoform OS=Bos taurus OX=9913 GN=AMELX PE=1 SV=2	1	hf1_10472_ebo_28_1_261219.ScanId;v=1;d1=33948.33948.3	controllerType=0 controllerNumber=1 scan=33948	68.0034
08386:3	1	S.MPLPPHPGHPG.Y			379.529	3	1136.57	1136.57	0	5.4	17	Non	201.46	201.46	201.46	2.49	1278	>sp|P02817|AMELX_BOVIN Amelogenin, X isoform OS=Bos taurus OX=9913 GN=AMELX PE=1 SV=2	1	hf1_10472_ebo_28_1_261219.ScanId;v=1;d1=7528.7528.3	controllerType=0 controllerNumber=1 scan=7528	20.9311
01418:3	1	S.MPLPPHPGHPG.Y			379.528	3	1136.57	1136.57	0	3.4	17	Non	203.93	203.93	203.93	2.86	1278	>sp|P02817|AMELX_BOVIN Amelogenin, X isoform OS=Bos taurus OX=9913 GN=AMELX PE=1 SV=2	1	hf1_10472_ebo_28_1_261219.ScanId;v=1;d1=2713.2713.3	controllerType=0 controllerNumber=1 scan=2713	12.4779
47654:3	1	S.MPLPPHPGHPG.Y			379.529	3	1136.57	1136.57	0	4.3	17	Non	204.3	204.3	204.3	3.05	1278	>sp|P02817|AMELX_BOVIN Amelogenin, X isoform OS=Bos taurus OX=9913 GN=AMELX PE=1 SV=2	1	hf1_10472_ebo_28_1_261219.ScanId;v=1;d1=34453.34453.3	controllerType=0 controllerNumber=1 scan=34453	69.3213
13332:3	1	S.MPLPPHPGHPG.Y			379.529	3	1136.57	1136.57	0	4.1	17	Non	251.23	251.23	251.23	4.12	1278	>sp|P02817|AMELX_BOVIN Amelogenin, X isoform OS=Bos taurus OX=9913 GN=AMELX PE=1 SV=2	1	hf1_10472_ebo_28_1_261219.ScanId;v=1;d1=10904.10904.3	controllerType=0 controllerNumber=1 scan=10904	26.8384
10672:3	1	S.MPLPPHPGHPG.Y			379.53	3	1136.57	1136.57	0	6.7	17	Non	255.2	190.07	190.07	3.93	1278	>sp|P02817|AMELX_BOVIN Amelogenin, X isoform OS=Bos taurus OX=9913 GN=AMELX PE=1 SV=2	1	hf1_10472_ebo_28_1_261219.ScanId;v=1;d1=9064.9064.3	controllerType=0 controllerNumber=1 scan=9064	23.6026
00833:3	1	S.MPLPPHPGHPG.Y			379.529	3	1136.57	1136.57	0	4.2	17	Non	261.03	261.03	261.03	4.35	1278	>sp|P02817|AMELX_BOVIN Amelogenin, X isoform OS=Bos taurus OX=9913 GN=AMELX PE=1 SV=2	1	hf1_10472_ebo_28_1_261219.ScanId;v=1;d1=2222.2222.3	controllerType=0 controllerNumber=1 scan=2222	11.1222
14339:3	1	S.MPLPPHPGHPG.Y			379.529	3	1136.57	1136.57	0	6.1	17	Non	263.03	263.03	263.03	4.14	1278	>sp|P02817|AMELX_BOVIN Amelogenin, X isoform OS=Bos taurus OX=9913 GN=AMELX PE=1 SV=2	1	hf1_10472_ebo_28_1_261219.ScanId;v=1;d1=11578.11578.3	controllerType=0 controllerNumber=1 scan=11578	28.0152
14041:3	1	S.MPLPPHPGHPG.Y			379.53	3	1136.57	1136.57	0	6.3	17	Non	266.73	266.73	266.73	4.37	1278	>sp|P02817|AMELX_BOVIN Amelogenin, X isoform OS=Bos taurus OX=9913 GN=AMELX PE=1 SV=2	1	hf1_10472_ebo_28_1_261219.ScanId;v=1;d1=11380.11380.3	controllerType=0 controllerNumber=1 scan=11380	27.6645
01446:3	1	S.MPLPPHPGHPG.Y			379.529	3	1136.57	1136.57	0	4.2	17	Non	278.31	278.31	278.31	4.3	1278	>sp|P02817|AMELX_BOVIN Amelogenin, X isoform OS=Bos taurus OX=9913 GN=AMELX PE=1 SV=2	1	hf1_10472_ebo_28_1_261219.ScanId;v=1;d1=2731.2731.3	controllerType=0 controllerNumber=1 scan=2731	12.5104
00924:3	1	S.MPLPPHPGHPG.Y			379.529	3	1136.57	1136.57	0	4.7	17	Non	283.62	283.62	283.62	4.64	1278	>sp|P02817|AMELX_BOVIN Amelogenin, X isoform OS=Bos taurus OX=9913 GN=AMELX PE=1 SV=2	1	hf1_10472_ebo_28_1_261219.ScanId;v=1;d1=2318.2318.3	controllerType=0 controllerNumber=1 scan=2318	11.465
49133:3	1	S.MPLPPHPGHPG.Y			379.53	3	1136.58	1136.57	0	7.7	17	Non	296.75	289.99	289.99	4.94	1278	>sp|P02817|AMELX_BOVIN Amelogenin, X isoform OS=Bos taurus OX=9913 GN=AMELX PE=1 SV=2	1	hf1_10472_ebo_28_1_261219.ScanId;v=1;d1=35877.35877.3	controllerType=0 controllerNumber=1 scan=35877	73.5158
01067:3	1	S.MPLPPHPGHPG.Y			379.529	3	1136.57	1136.57	0	5	17	Non	300.39	300.39	300.39	4.69	1278	>sp|P02817|AMELX_BOVIN Amelogenin, X isoform OS=Bos taurus OX=9913 GN=AMELX PE=1 SV=2	1	hf1_10472_ebo_28_1_261219.ScanId;v=1;d1=2439.2439.3	controllerType=0 controllerNumber=1 scan=2439	11.8111
13635:3	1	S.MPLPPHPGHPG.Y			379.529	3	1136.57	1136.57	0	5.4	17	Non	305.95	265.99	265.99	4.37	1278	>sp|P02817|AMELX_BOVIN Amelogenin, X isoform OS=Bos taurus OX=9913 GN=AMELX PE=1 SV=2	1	hf1_10472_ebo_28_1_261219.ScanId;v=1;d1=11108.11108.3	controllerType=0 controllerNumber=1 scan=11108	27.1973
00015:3	1	S.MPLPPHPGHPG.Y			379.529	3	1136.57	1136.57	0	5.7	17	Non	324.54	258.05	258.05	4.62	1278	>sp|P02817|AMELX_BOVIN Amelogenin, X isoform OS=Bos taurus OX=9913 GN=AMELX PE=1 SV=2	1	hf1_10472_ebo_28_1_261219.ScanId;v=1;d1=102.102.3	controllerType=0 controllerNumber=1 scan=102	0.5244
01200:3	1	S.MPLPPHPGHPG.Y			379.529	3	1136.57	1136.57	0	5.9	17	Non	333.26	333.26	333.26	4.92	1278	>sp|P02817|AMELX_BOVIN Amelogenin, X isoform OS=Bos taurus OX=9913 GN=AMELX PE=1 SV=2	1	hf1_10472_ebo_28_1_261219.ScanId;v=1;d1=2552.2552.3	controllerType=0 controllerNumber=1 scan=2552	12.1487
00589:3	1	S.MPLPPHPGHPG.Y			379.529	3	1136.57	1136.57	0	3.8	17	Non	343.08	343.08	343.08	4.67	1278	>sp|P02817|AMELX_BOVIN Amelogenin, X isoform OS=Bos taurus OX=9913 GN=AMELX PE=1 SV=2	1	hf1_10472_ebo_28_1_261219.ScanId;v=1;d1=1998.1998.3	controllerType=0 controllerNumber=1 scan=1998	10.441
00702:3	1	S.MPLPPHPGHPG.Y			379.529	3	1136.57	1136.57	0	4.2	17	Non	364.19	364.19	364.19	6.24	1278	>sp|P02817|AMELX_BOVIN Amelogenin, X isoform OS=Bos taurus OX=9913 GN=AMELX PE=1 SV=2	1	hf1_10472_ebo_28_1_261219.ScanId;v=1;d1=2107.2107.3	controllerType=0 controllerNumber=1 scan=2107	10.7854
12963:3	1	S.MPLPPHPGHPG.Y			379.529	3	1136.57	1136.57	0	4.9	17	Non	383.13	364.64	364.64	5.81	1278	>sp|P02817|AMELX_BOVIN Amelogenin, X isoform OS=Bos taurus OX=9913 GN=AMELX PE=1 SV=2	1	hf1_10472_ebo_28_1_261219.ScanId;v=1;d1=10654.10654.3	controllerType=0 controllerNumber=1 scan=10654	26.3991
12665:3	1	S.MPLPPHPGHPG.Y			379.529	3	1136.57	1136.57	0	5.4	17	Non	414.2	312.48	312.48	4.82	1278	>sp|P02817|AMELX_BOVIN Amelogenin, X isoform OS=Bos taurus OX=9913 GN=AMELX PE=1 SV=2	1	hf1_10472_ebo_28_1_261219.ScanId;v=1;d1=10452.10452.3	controllerType=0 controllerNumber=1 scan=10452	26.0429
10960:3	1	S.MPLPPHPGHPG.Y			379.529	3	1136.57	1136.57	0	5.1	17	Non	466.39	437	437	6.5	1278	>sp|P02817|AMELX_BOVIN Amelogenin, X isoform OS=Bos taurus OX=9913 GN=AMELX PE=1 SV=2	1	hf1_10472_ebo_28_1_261219.ScanId;v=1;d1=9262.9262.3	controllerType=0 controllerNumber=1 scan=9262	23.9512
12381:3	1	S.MPLPPHPGHPG.Y			379.529	3	1136.57	1136.57	0	5.2	17	Non	472.14	435.26	435.26	6.5	1278	>sp|P02817|AMELX_BOVIN Amelogenin, X isoform OS=Bos taurus OX=9913 GN=AMELX PE=1 SV=2	1	hf1_10472_ebo_28_1_261219.ScanId;v=1;d1=10253.10253.3	controllerType=0 controllerNumber=1 scan=10253	25.6937
11528:3	1	S.MPLPPHPGHPG.Y			379.53	3	1136.57	1136.57	0	6.7	17	Non	477.41	394.84	394.84	6.76	1278	>sp|P02817|AMELX_BOVIN Amelogenin, X isoform OS=Bos taurus OX=9913 GN=AMELX PE=1 SV=2	1	hf1_10472_ebo_28_1_261219.ScanId;v=1;d1=9654.9654.3	controllerType=0 controllerNumber=1 scan=9654	24.6431
11242:3	1	S.MPLPPHPGHPG.Y			379.529	3	1136.57	1136.57	0	6	17	Non	493	421.05	421.05	6.58	1278	>sp|P02817|AMELX_BOVIN Amelogenin, X isoform OS=Bos taurus OX=9913 GN=AMELX PE=1 SV=2	1	hf1_10472_ebo_28_1_261219.ScanId;v=1;d1=9459.9459.3	controllerType=0 controllerNumber=1 scan=9459	24.2991
12160:2	1	S.MPLPPHPGHPG.Y			568.789	2	1136.57	1136.57	0	3.2	17	Non	504.42	487.93	487.93	5.61	1278	>sp|P02817|AMELX_BOVIN Amelogenin, X isoform OS=Bos taurus OX=9913 GN=AMELX PE=1 SV=2	1	hf1_10472_ebo_28_1_261219.ScanId;v=1;d1=10091.10091.4	controllerType=0 controllerNumber=1 scan=10091	25.4043
11820:3	1	S.MPLPPHPGHPG.Y			379.53	3	1136.58	1136.57	0	7.1	17	Non	504.48	425.05	425.05	6.84	1278	>sp|P02817|AMELX_BOVIN Amelogenin, X isoform OS=Bos taurus OX=9913 GN=AMELX PE=1 SV=2	1	hf1_10472_ebo_28_1_261219.ScanId;v=1;d1=9856.9856.3	controllerType=0 controllerNumber=1 scan=9856	24.9956
00423:3	1	S.MPLPPHPGHPG.Y			379.528	3	1136.57	1136.57	0	3.2	17	Non	511.1	506.78	506.78	6.33	1278	>sp|P02817|AMELX_BOVIN Amelogenin, X isoform OS=Bos taurus OX=9913 GN=AMELX PE=1 SV=2	1	hf1_10472_ebo_28_1_261219.ScanId;v=1;d1=1860.1860.3	controllerType=0 controllerNumber=1 scan=1860	10.0983
12135:2	1	S.MPLPPHPGHPG.Y			568.79	2	1136.57	1136.57	0	4.4	17	Non	515.76	460.62	460.62	5.61	1278	>sp|P02817|AMELX_BOVIN Amelogenin, X isoform OS=Bos taurus OX=9913 GN=AMELX PE=1 SV=2	1	hf1_10472_ebo_28_1_261219.ScanId;v=1;d1=10071.10071.2	controllerType=0 controllerNumber=1 scan=10071	25.3669
12113:3	1	S.MPLPPHPGHPG.Y			379.529	3	1136.57	1136.57	0	4.4	17	Non	528.6	513.08	513.08	6.69	1278	>sp|P02817|AMELX_BOVIN Amelogenin, X isoform OS=Bos taurus OX=9913 GN=AMELX PE=1 SV=2	1	hf1_10472_ebo_28_1_261219.ScanId;v=1;d1=10054.10054.3	controllerType=0 controllerNumber=1 scan=10054	25.3393
11544:2	1	S.MPLPPHPGHPG.Y			568.79	2	1136.57	1136.57	0	5.6	17	Non	631.66	444.33	444.33	8.43	1278	>sp|P02817|AMELX_BOVIN Amelogenin, X isoform OS=Bos taurus OX=9913 GN=AMELX PE=1 SV=2	1	hf1_10472_ebo_28_1_261219.ScanId;v=1;d1=9665.9665.2	controllerType=0 controllerNumber=1 scan=9665	24.6624
10950:2	1	S.MPLPPHPGHPG.Y			568.79	2	1136.57	1136.57	0	4.9	17	Non	645.35	584.42	584.42	8.43	1278	>sp|P02817|AMELX_BOVIN Amelogenin, X isoform OS=Bos taurus OX=9913 GN=AMELX PE=1 SV=2	1	hf1_10472_ebo_28_1_261219.ScanId;v=1;d1=9255.9255.2	controllerType=0 controllerNumber=1 scan=9255	23.938
11225:2	1	S.MPLPPHPGHPG.Y			568.79	2	1136.57	1136.57	0	5	17	Non	653.19	577.9	577.9	9.43	1278	>sp|P02817|AMELX_BOVIN Amelogenin, X isoform OS=Bos taurus OX=9913 GN=AMELX PE=1 SV=2	1	hf1_10472_ebo_28_1_261219.ScanId;v=1;d1=9448.9448.2	controllerType=0 controllerNumber=1 scan=9448	24.2799
11248:2	1	S.MPLPPHPGHPG.Y			568.79	2	1136.57	1136.57	0	5.5	17	Non	678.54	521.85	521.85	9.43	1278	>sp|P02817|AMELX_BOVIN Amelogenin, X isoform OS=Bos taurus OX=9913 GN=AMELX PE=1 SV=2	1	hf1_10472_ebo_28_1_261219.ScanId;v=1;d1=9463.9463.2	controllerType=0 controllerNumber=1 scan=9463	24.3045
00925:3	1	S.MP[+15.995]LPPHPGHPG.Y		P[+16]	384.861	3	1152.57	1152.56	0	4.5	17	Non	20.13	20.13	4	0.96	1278	>sp|P02817|AMELX_BOVIN Amelogenin, X isoform OS=Bos taurus OX=9913 GN=AMELX PE=1 SV=2	1	hf1_10472_ebo_28_1_261219.ScanId;v=1;d1=2320.2320.3	controllerType=0 controllerNumber=1 scan=2320	11.4713
01202:3	1	S.MP[+15.995]LPPHPGHPG.Y		P[+16]	384.861	3	1152.57	1152.56	0	5.5	17	Non	22.53	22.53	4	0.96	1278	>sp|P02817|AMELX_BOVIN Amelogenin, X isoform OS=Bos taurus OX=9913 GN=AMELX PE=1 SV=2	1	hf1_10472_ebo_28_1_261219.ScanId;v=1;d1=2555.2555.3	controllerType=0 controllerNumber=1 scan=2555	12.1565
00590:3	1	S.MP[+15.995]LPPHPGHPG.Y		P[+16]	384.86	3	1152.57	1152.56	0	3.9	17	Non	24.35	24.35	4	0.91	1278	>sp|P02817|AMELX_BOVIN Amelogenin, X isoform OS=Bos taurus OX=9913 GN=AMELX PE=1 SV=2	1	hf1_10472_ebo_28_1_261219.ScanId;v=1;d1=1999.1999.3	controllerType=0 controllerNumber=1 scan=1999	10.4425
00214:3	1	S.MP[+15.995]LPPHPGHPG.Y		P[+16]	384.861	3	1152.57	1152.56	0	5	17	Non	38.07	38.07	4	1.44	1278	>sp|P02817|AMELX_BOVIN Amelogenin, X isoform OS=Bos taurus OX=9913 GN=AMELX PE=1 SV=2	1	hf1_10472_ebo_28_1_261219.ScanId;v=1;d1=707.707.3	controllerType=0 controllerNumber=1 scan=707	3.6686
01068:3	1	S.M[+15.995]PLPPHPGHPG.Y		M[+16]	384.861	3	1152.57	1152.56	0	4.8	17	Non	49.81	49.81	31.79	1.47	1278	>sp|P02817|AMELX_BOVIN Amelogenin, X isoform OS=Bos taurus OX=9913 GN=AMELX PE=1 SV=2	1	hf1_10472_ebo_28_1_261219.ScanId;v=1;d1=2440.2440.3	controllerType=0 controllerNumber=1 scan=2440	11.8126
00835:3	1	S.MP[+15.995]LPPHPGHPG.Y		P[+16]	384.861	3	1152.57	1152.56	0	4.5	17	Non	73.84	73.84	4	1.47	1278	>sp|P02817|AMELX_BOVIN Amelogenin, X isoform OS=Bos taurus OX=9913 GN=AMELX PE=1 SV=2	1	hf1_10472_ebo_28_1_261219.ScanId;v=1;d1=2225.2225.3	controllerType=0 controllerNumber=1 scan=2225	11.1312
00703:3	1	S.MP[+15.995]LPPHPGHPG.Y		P[+16]	384.86	3	1152.57	1152.56	0	4.3	17	Non	80.42	80.42	4	2.16	1278	>sp|P02817|AMELX_BOVIN Amelogenin, X isoform OS=Bos taurus OX=9913 GN=AMELX PE=1 SV=2	1	hf1_10472_ebo_28_1_261219.ScanId;v=1;d1=2108.2108.3	controllerType=0 controllerNumber=1 scan=2108	10.7869
00007:2	1	S.MP[+15.995]LPPHPGHPG.Y		P[+16]	576.788	2	1152.57	1152.56	0	5.7	17	Non	190.69	182.34	4	2.47	1278	>sp|P02817|AMELX_BOVIN Amelogenin, X isoform OS=Bos taurus OX=9913 GN=AMELX PE=1 SV=2	1	hf1_10472_ebo_28_1_261219.ScanId;v=1;d1=96.96.2	controllerType=0 controllerNumber=1 scan=96	0.5126
09849:2	1	S.MPLPPHPGHP[+15.995]G.Y		P[+16]	576.789	2	1152.57	1152.56	0	7.8	17	Non	210.05	210.05	4.11	2.3	1278	>sp|P02817|AMELX_BOVIN Amelogenin, X isoform OS=Bos taurus OX=9913 GN=AMELX PE=1 SV=2	1	hf1_10472_ebo_28_1_261219.ScanId;v=1;d1=8515.8515.2	controllerType=0 controllerNumber=1 scan=8515	22.6463
10199:2	1	S.MPLPPHPGHP[+15.995]G.Y		P[+16]	576.789	2	1152.57	1152.56	0	6.9	17	Non	216.34	216.34	46.98	2.75	1278	>sp|P02817|AMELX_BOVIN Amelogenin, X isoform OS=Bos taurus OX=9913 GN=AMELX PE=1 SV=2	1	hf1_10472_ebo_28_1_261219.ScanId;v=1;d1=8746.8746.4	controllerType=0 controllerNumber=1 scan=8746	23.0467
12098:3	1	S.M[+15.995]PLPPHPGHPG.Y		M[+16]	384.861	3	1152.57	1152.56	0	5	17	Non	226.8	226.8	10.29	2.87	1278	>sp|P02817|AMELX_BOVIN Amelogenin, X isoform OS=Bos taurus OX=9913 GN=AMELX PE=1 SV=2	1	hf1_10472_ebo_28_1_261219.ScanId;v=1;d1=10043.10043.3	controllerType=0 controllerNumber=1 scan=10043	25.3201
10809:3	1	S.MPLPPHPGH[+15.995]PG.Y		H[+16]	384.861	3	1152.57	1152.56	0	5.3	17	Non	258.79	234.94	7.91	4.09	1278	>sp|P02817|AMELX_BOVIN Amelogenin, X isoform OS=Bos taurus OX=9913 GN=AMELX PE=1 SV=2	1	hf1_10472_ebo_28_1_261219.ScanId;v=1;d1=9156.9156.3	controllerType=0 controllerNumber=1 scan=9156	23.7637
11116:3	1	S.MP[+15.995]LPPHPGHPG.Y		P[+16]	384.861	3	1152.57	1152.56	0	4.8	17	Non	267	196.61	5.8	3.91	1278	>sp|P02817|AMELX_BOVIN Amelogenin, X isoform OS=Bos taurus OX=9913 GN=AMELX PE=1 SV=2	1	hf1_10472_ebo_28_1_261219.ScanId;v=1;d1=9368.9368.3	controllerType=0 controllerNumber=1 scan=9368	24.1398
11421:3	1	S.M[+15.995]PLPPHPGHPG.Y		M[+16]	384.861	3	1152.57	1152.56	0	5.4	17	Non	272.44	190.31	9.4	3.68	1278	>sp|P02817|AMELX_BOVIN Amelogenin, X isoform OS=Bos taurus OX=9913 GN=AMELX PE=1 SV=2	1	hf1_10472_ebo_28_1_261219.ScanId;v=1;d1=9582.9582.3	controllerType=0 controllerNumber=1 scan=9582	24.5172
09454:3	1	S.M[+15.995]PLPPHPGHPG.Y		M[+16]	384.861	3	1152.57	1152.56	0	4.3	17	Non	309.7	295.46	27.6	4.21	1278	>sp|P02817|AMELX_BOVIN Amelogenin, X isoform OS=Bos taurus OX=9913 GN=AMELX PE=1 SV=2	1	hf1_10472_ebo_28_1_261219.ScanId;v=1;d1=8251.8251.3	controllerType=0 controllerNumber=1 scan=8251	22.1897
06173:2	1	S.M[+15.995]PLPPHPGHPG.Y		M[+16]	576.787	2	1152.57	1152.56	0	4.1	17	Non	333.83	333.83	15.05	4.4	1278	>sp|P02817|AMELX_BOVIN Amelogenin, X isoform OS=Bos taurus OX=9913 GN=AMELX PE=1 SV=2	1	hf1_10472_ebo_28_1_261219.ScanId;v=1;d1=6012.6012.2	controllerType=0 controllerNumber=1 scan=6012	18.2744
10507:3	1	S.MPLPPHPGHP[+15.995]G.Y		P[+16]	384.861	3	1152.57	1152.56	0	6.4	17	Non	337.29	266.22	4.76	4.62	1278	>sp|P02817|AMELX_BOVIN Amelogenin, X isoform OS=Bos taurus OX=9913 GN=AMELX PE=1 SV=2	1	hf1_10472_ebo_28_1_261219.ScanId;v=1;d1=8959.8959.3	controllerType=0 controllerNumber=1 scan=8959	23.4209
00171:2	1	S.M[+15.995]PLPPHPGHPG.Y		M[+16]	576.788	2	1152.57	1152.56	0	5.3	17	Non	349.01	277.6	40.53	5.25	1278	>sp|P02817|AMELX_BOVIN Amelogenin, X isoform OS=Bos taurus OX=9913 GN=AMELX PE=1 SV=2	1	hf1_10472_ebo_28_1_261219.ScanId;v=1;d1=636.636.2	controllerType=0 controllerNumber=1 scan=636	3.3478
09762:3	1	S.MPLPPHPGHP[+15.995]G.Y		P[+16]	384.861	3	1152.57	1152.56	0	6.1	17	Non	350.59	250.35	2.09	4.44	1278	>sp|P02817|AMELX_BOVIN Amelogenin, X isoform OS=Bos taurus OX=9913 GN=AMELX PE=1 SV=2	1	hf1_10472_ebo_28_1_261219.ScanId;v=1;d1=8457.8457.3	controllerType=0 controllerNumber=1 scan=8457	22.5464
06258:3	1	S.M[+15.995]PLPPHPGHPG.Y		M[+16]	384.86	3	1152.57	1152.56	0	4.2	17	Non	370.91	370.91	27.84	6.24	1278	>sp|P02817|AMELX_BOVIN Amelogenin, X isoform OS=Bos taurus OX=9913 GN=AMELX PE=1 SV=2	1	hf1_10472_ebo_28_1_261219.ScanId;v=1;d1=6074.6074.3	controllerType=0 controllerNumber=1 scan=6074	18.383
09146:3	1	S.M[+15.995]PLPPHPGHPG.Y		M[+16]	384.861	3	1152.57	1152.56	0	5.4	17	Non	374.22	327	31.3	4.78	1278	>sp|P02817|AMELX_BOVIN Amelogenin, X isoform OS=Bos taurus OX=9913 GN=AMELX PE=1 SV=2	1	hf1_10472_ebo_28_1_261219.ScanId;v=1;d1=8046.8046.3	controllerType=0 controllerNumber=1 scan=8046	21.8331
49165:3	1	S.M[+15.995]PLPPHPGHPG.Y		M[+16]	384.862	3	1152.57	1152.56	0	8.1	17	Non	380.8	365.32	37.3	6.75	1278	>sp|P02817|AMELX_BOVIN Amelogenin, X isoform OS=Bos taurus OX=9913 GN=AMELX PE=1 SV=2	1	hf1_10472_ebo_28_1_261219.ScanId;v=1;d1=35900.35900.3	controllerType=0 controllerNumber=1 scan=35900	73.5562
10220:3	1	S.MPLPPHPGHP[+15.995]G.Y		P[+16]	384.861	3	1152.57	1152.56	0	6.1	17	Non	381.41	306.19	8.76	4.79	1278	>sp|P02817|AMELX_BOVIN Amelogenin, X isoform OS=Bos taurus OX=9913 GN=AMELX PE=1 SV=2	1	hf1_10472_ebo_28_1_261219.ScanId;v=1;d1=8763.8763.3	controllerType=0 controllerNumber=1 scan=8763	23.0778
00034:3	1	S.M[+15.995]PLPPHPGHPG.Y		M[+16]	384.862	3	1152.57	1152.56	0	7.3	17	Non	386.04	268.95	31.13	4.96	1278	>sp|P02817|AMELX_BOVIN Amelogenin, X isoform OS=Bos taurus OX=9913 GN=AMELX PE=1 SV=2	1	hf1_10472_ebo_28_1_261219.ScanId;v=1;d1=115.115.3	controllerType=0 controllerNumber=1 scan=115	0.5467
08266:3	1	S.M[+15.995]PLPPHPGHPG.Y		M[+16]	384.861	3	1152.57	1152.56	0	5.7	17	Non	386.62	335	32.82	5.01	1278	>sp|P02817|AMELX_BOVIN Amelogenin, X isoform OS=Bos taurus OX=9913 GN=AMELX PE=1 SV=2	1	hf1_10472_ebo_28_1_261219.ScanId;v=1;d1=7448.7448.3	controllerType=0 controllerNumber=1 scan=7448	20.7928
08852:3	1	S.M[+15.995]PLPPHPGHPG.Y		M[+16]	384.861	3	1152.57	1152.56	0	4.9	17	Non	393.19	346.43	33.53	5.01	1278	>sp|P02817|AMELX_BOVIN Amelogenin, X isoform OS=Bos taurus OX=9913 GN=AMELX PE=1 SV=2	1	hf1_10472_ebo_28_1_261219.ScanId;v=1;d1=7848.7848.3	controllerType=0 controllerNumber=1 scan=7848	21.4886
08560:3	1	S.M[+15.995]PLPPHPGHPG.Y		M[+16]	384.861	3	1152.57	1152.56	0	4.7	17	Non	394.04	317.67	35.47	4.79	1278	>sp|P02817|AMELX_BOVIN Amelogenin, X isoform OS=Bos taurus OX=9913 GN=AMELX PE=1 SV=2	1	hf1_10472_ebo_28_1_261219.ScanId;v=1;d1=7648.7648.3	controllerType=0 controllerNumber=1 scan=7648	21.1392
07105:3	1	S.M[+15.995]PLPPHPGHPG.Y		M[+16]	384.861	3	1152.57	1152.56	0	6.2	17	Non	400.12	387.25	38.3	6.52	1278	>sp|P02817|AMELX_BOVIN Amelogenin, X isoform OS=Bos taurus OX=9913 GN=AMELX PE=1 SV=2	1	hf1_10472_ebo_28_1_261219.ScanId;v=1;d1=6659.6659.3	controllerType=0 controllerNumber=1 scan=6659	19.4233
00422:3	1	S.M[+15.995]PLPPHPGHPG.Y		M[+16]	384.86	3	1152.57	1152.56	0	2.9	17	Non	406.06	394.18	34.56	5.65	1278	>sp|P02817|AMELX_BOVIN Amelogenin, X isoform OS=Bos taurus OX=9913 GN=AMELX PE=1 SV=2	1	hf1_10472_ebo_28_1_261219.ScanId;v=1;d1=1858.1858.3	controllerType=0 controllerNumber=1 scan=1858	10.0926
06522:3	1	S.M[+15.995]PLPPHPGHPG.Y		M[+16]	384.861	3	1152.57	1152.56	0	5.9	17	Non	407.65	352.53	37.18	5.67	1278	>sp|P02817|AMELX_BOVIN Amelogenin, X isoform OS=Bos taurus OX=9913 GN=AMELX PE=1 SV=2	1	hf1_10472_ebo_28_1_261219.ScanId;v=1;d1=6260.6260.3	controllerType=0 controllerNumber=1 scan=6260	18.7237
07973:3	1	S.M[+15.995]PLPPHPGHPG.Y		M[+16]	384.861	3	1152.57	1152.56	0	6.2	17	Non	430.17	390.26	45.5	6.52	1278	>sp|P02817|AMELX_BOVIN Amelogenin, X isoform OS=Bos taurus OX=9913 GN=AMELX PE=1 SV=2	1	hf1_10472_ebo_28_1_261219.ScanId;v=1;d1=7250.7250.3	controllerType=0 controllerNumber=1 scan=7250	20.4502
06810:3	1	S.M[+15.995]PLPPHPGHPG.Y		M[+16]	384.861	3	1152.57	1152.56	0	6	17	Non	434.27	375.9	38.7	6.52	1278	>sp|P02817|AMELX_BOVIN Amelogenin, X isoform OS=Bos taurus OX=9913 GN=AMELX PE=1 SV=2	1	hf1_10472_ebo_28_1_261219.ScanId;v=1;d1=6461.6461.3	controllerType=0 controllerNumber=1 scan=6461	19.0791
07399:3	1	S.M[+15.995]PLPPHPGHPG.Y		M[+16]	384.861	3	1152.57	1152.56	0	4.9	17	Non	449.88	440.28	36.22	6.5	1278	>sp|P02817|AMELX_BOVIN Amelogenin, X isoform OS=Bos taurus OX=9913 GN=AMELX PE=1 SV=2	1	hf1_10472_ebo_28_1_261219.ScanId;v=1;d1=6855.6855.3	controllerType=0 controllerNumber=1 scan=6855	19.7657
07688:3	1	S.M[+15.995]PLPPHPGHPG.Y		M[+16]	384.861	3	1152.57	1152.56	0	6	17	Non	480.34	422.52	35.75	6.58	1278	>sp|P02817|AMELX_BOVIN Amelogenin, X isoform OS=Bos taurus OX=9913 GN=AMELX PE=1 SV=2	1	hf1_10472_ebo_28_1_261219.ScanId;v=1;d1=7052.7052.3	controllerType=0 controllerNumber=1 scan=7052	20.1067
08185:2	1	S.M[+15.995]PLPPHPGHPG.Y		M[+16]	576.788	2	1152.57	1152.56	0	5.5	17	Non	493.07	371.66	70.32	6.53	1278	>sp|P02817|AMELX_BOVIN Amelogenin, X isoform OS=Bos taurus OX=9913 GN=AMELX PE=1 SV=2	1	hf1_10472_ebo_28_1_261219.ScanId;v=1;d1=7393.7393.2	controllerType=0 controllerNumber=1 scan=7393	20.6966
00159:3	1	S.M[+15.995]PLPPHPGHPG.Y		M[+16]	384.86	3	1152.57	1152.56	0	4.3	17	Non	500.1	434.05	42.31	6.33	1278	>sp|P02817|AMELX_BOVIN Amelogenin, X isoform OS=Bos taurus OX=9913 GN=AMELX PE=1 SV=2	1	hf1_10472_ebo_28_1_261219.ScanId;v=1;d1=626.626.3	controllerType=0 controllerNumber=1 scan=626	3.3302
07893:2	1	S.M[+15.995]PLPPHPGHPG.Y		M[+16]	576.788	2	1152.57	1152.56	0	5.7	17	Non	548.44	403.55	95.62	6.02	1278	>sp|P02817|AMELX_BOVIN Amelogenin, X isoform OS=Bos taurus OX=9913 GN=AMELX PE=1 SV=2	1	hf1_10472_ebo_28_1_261219.ScanId;v=1;d1=7196.7196.2	controllerType=0 controllerNumber=1 scan=7196	20.3553
06444:2	1	S.M[+15.995]PLPPHPGHPG.Y		M[+16]	576.787	2	1152.57	1152.56	0	4.3	17	Non	557.76	533.24	71.87	6.39	1278	>sp|P02817|AMELX_BOVIN Amelogenin, X isoform OS=Bos taurus OX=9913 GN=AMELX PE=1 SV=2	1	hf1_10472_ebo_28_1_261219.ScanId;v=1;d1=6203.6203.2	controllerType=0 controllerNumber=1 scan=6203	18.6206
07310:2	1	S.M[+15.995]PLPPHPGHPG.Y		M[+16]	576.788	2	1152.57	1152.56	0	5.1	17	Non	577.6	465.44	71.67	6.81	1278	>sp|P02817|AMELX_BOVIN Amelogenin, X isoform OS=Bos taurus OX=9913 GN=AMELX PE=1 SV=2	1	hf1_10472_ebo_28_1_261219.ScanId;v=1;d1=6796.6796.2	controllerType=0 controllerNumber=1 scan=6796	19.6626
07608:2	1	S.M[+15.995]PLPPHPGHPG.Y		M[+16]	576.788	2	1152.57	1152.56	0	5.6	17	Non	578.96	476.87	90.92	6.81	1278	>sp|P02817|AMELX_BOVIN Amelogenin, X isoform OS=Bos taurus OX=9913 GN=AMELX PE=1 SV=2	1	hf1_10472_ebo_28_1_261219.ScanId;v=1;d1=6997.6997.2	controllerType=0 controllerNumber=1 scan=6997	20.0112
06719:2	1	S.M[+15.995]PLPPHPGHPG.Y		M[+16]	576.788	2	1152.57	1152.56	0	5.1	17	Non	604.42	502.11	96.49	8.43	1278	>sp|P02817|AMELX_BOVIN Amelogenin, X isoform OS=Bos taurus OX=9913 GN=AMELX PE=1 SV=2	1	hf1_10472_ebo_28_1_261219.ScanId;v=1;d1=6395.6395.2	controllerType=0 controllerNumber=1 scan=6395	18.9638
07002:2	1	S.M[+15.995]PLPPHPGHPG.Y		M[+16]	576.788	2	1152.57	1152.56	0	5.6	17	Non	607.93	501.1	103.28	8.43	1278	>sp|P02817|AMELX_BOVIN Amelogenin, X isoform OS=Bos taurus OX=9913 GN=AMELX PE=1 SV=2	1	hf1_10472_ebo_28_1_261219.ScanId;v=1;d1=6593.6593.2	controllerType=0 controllerNumber=1 scan=6593	19.3077
06682:3	1	S.M[+15.995]PLPPHPGHP[+15.995]G.Y		M[+16], P[+16]	390.192	3	1168.56	1168.56	0	4.7	17	Non	124.68	124.68	1.68	0.94	1278	>sp|P02817|AMELX_BOVIN Amelogenin, X isoform OS=Bos taurus OX=9913 GN=AMELX PE=1 SV=2	1	hf1_10472_ebo_28_1_261219.ScanId;v=1;d1=6368.6368.3	controllerType=0 controllerNumber=1 scan=6368	18.9149
06246:3	1	S.MP[+15.995]LPPHPGHP[+15.995]G.Y		P[+16]*2	390.189	3	1168.55	1168.56	0	-3.8	17	Non	135.49	135.49	0.75	0.67	1278	>sp|P02817|AMELX_BOVIN Amelogenin, X isoform OS=Bos taurus OX=9913 GN=AMELX PE=1 SV=2	1	hf1_10472_ebo_28_1_261219.ScanId;v=1;d1=6065.6065.2	controllerType=0 controllerNumber=1 scan=6065	18.3677
06471:3	1	S.MP[+15.995]LPPHPGHP[+15.995]G.Y		P[+16]*2	390.192	3	1168.56	1168.56	0	4.6	17	Non	142.36	142.36	0.04	1.49	1278	>sp|P02817|AMELX_BOVIN Amelogenin, X isoform OS=Bos taurus OX=9913 GN=AMELX PE=1 SV=2	1	hf1_10472_ebo_28_1_261219.ScanId;v=1;d1=6222.6222.3	controllerType=0 controllerNumber=1 scan=6222	18.6529
05724:3	1	S.M[+15.995]PLPPHPGHP[+15.995]G.Y		M[+16], P[+16]	390.193	3	1168.56	1168.56	0	5.9	17	Non	368.93	308.95	14.71	4.61	1278	>sp|P02817|AMELX_BOVIN Amelogenin, X isoform OS=Bos taurus OX=9913 GN=AMELX PE=1 SV=2	1	hf1_10472_ebo_28_1_261219.ScanId;v=1;d1=5709.5709.3	controllerType=0 controllerNumber=1 scan=5709	17.7443
15718:2	1	S.MPLPPHPGHPGY.I			650.323	2	1299.64	1299.63	0	6.6	17	Non	139.25	73.05	73.05	1.01	1278	>sp|P02817|AMELX_BOVIN Amelogenin, X isoform OS=Bos taurus OX=9913 GN=AMELX PE=1 SV=2	1	hf1_10472_ebo_28_1_261219.ScanId;v=1;d1=12478.12478.4	controllerType=0 controllerNumber=1 scan=12478	29.5859
14315:2	1	S.MPLPPHPGHPGY.I			650.322	2	1299.64	1299.63	0	5.6	17	Non	249.79	204.56	204.56	3.46	1278	>sp|P02817|AMELX_BOVIN Amelogenin, X isoform OS=Bos taurus OX=9913 GN=AMELX PE=1 SV=2	1	hf1_10472_ebo_28_1_261219.ScanId;v=1;d1=11563.11563.2	controllerType=0 controllerNumber=1 scan=11563	27.9899
14626:2	1	S.MPLPPHPGHPGY.I			650.323	2	1299.64	1299.63	0	6.8	17	Non	323.09	232.25	232.25	4.13	1278	>sp|P02817|AMELX_BOVIN Amelogenin, X isoform OS=Bos taurus OX=9913 GN=AMELX PE=1 SV=2	1	hf1_10472_ebo_28_1_261219.ScanId;v=1;d1=11768.11768.2	controllerType=0 controllerNumber=1 scan=11768	28.3484
14023:2	1	S.MPLPPHPGHPGY.I			650.323	2	1299.64	1299.63	0	6.6	17	Non	350.25	256.81	256.81	4.65	1278	>sp|P02817|AMELX_BOVIN Amelogenin, X isoform OS=Bos taurus OX=9913 GN=AMELX PE=1 SV=2	1	hf1_10472_ebo_28_1_261219.ScanId;v=1;d1=11368.11368.2	controllerType=0 controllerNumber=1 scan=11368	27.6438
13883:3	1	S.MPLPPHPGHPGY.I			433.884	3	1299.64	1299.63	0	5.1	17	Non	441.05	350.32	350.32	4.97	1278	>sp|P02817|AMELX_BOVIN Amelogenin, X isoform OS=Bos taurus OX=9913 GN=AMELX PE=1 SV=2	1	hf1_10472_ebo_28_1_261219.ScanId;v=1;d1=11277.11277.3	controllerType=0 controllerNumber=1 scan=11277	27.4876
14488:3	1	S.MPLPPHPGHPGY.I			433.884	3	1299.64	1299.63	0	5.8	17	Non	448.6	342.75	342.75	5.65	1278	>sp|P02817|AMELX_BOVIN Amelogenin, X isoform OS=Bos taurus OX=9913 GN=AMELX PE=1 SV=2	1	hf1_10472_ebo_28_1_261219.ScanId;v=1;d1=11676.11676.3	controllerType=0 controllerNumber=1 scan=11676	28.1869
14189:3	1	S.MPLPPHPGHPGY.I			433.884	3	1299.64	1299.63	0	5.6	17	Non	463.97	330.4	330.4	5.65	1278	>sp|P02817|AMELX_BOVIN Amelogenin, X isoform OS=Bos taurus OX=9913 GN=AMELX PE=1 SV=2	1	hf1_10472_ebo_28_1_261219.ScanId;v=1;d1=11477.11477.3	controllerType=0 controllerNumber=1 scan=11477	27.8346
15294:2	1	S.MPLPPHPGHPGY.I			650.323	2	1299.64	1299.63	0	7.1	17	Non	501.53	396.72	396.72	6.79	1278	>sp|P02817|AMELX_BOVIN Amelogenin, X isoform OS=Bos taurus OX=9913 GN=AMELX PE=1 SV=2	1	hf1_10472_ebo_28_1_261219.ScanId;v=1;d1=12202.12202.2	controllerType=0 controllerNumber=1 scan=12202	29.1001
14795:3	1	S.MPLPPHPGHPGY.I			433.885	3	1299.64	1299.63	0	6.7	17	Non	513.88	387.62	387.62	6.84	1278	>sp|P02817|AMELX_BOVIN Amelogenin, X isoform OS=Bos taurus OX=9913 GN=AMELX PE=1 SV=2	1	hf1_10472_ebo_28_1_261219.ScanId;v=1;d1=11872.11872.3	controllerType=0 controllerNumber=1 scan=11872	28.529
15091:3	1	S.MPLPPHPGHPGY.I			433.884	3	1299.64	1299.63	0	5.7	17	Non	518.2	374.52	374.52	6.58	1278	>sp|P02817|AMELX_BOVIN Amelogenin, X isoform OS=Bos taurus OX=9913 GN=AMELX PE=1 SV=2	1	hf1_10472_ebo_28_1_261219.ScanId;v=1;d1=12070.12070.3	controllerType=0 controllerNumber=1 scan=12070	28.8708
13949:2	1	S.MPLPPHPGHPGY.I			650.323	2	1299.64	1299.63	0	6.6	17	Non	523.4	392.7	392.7	6.27	1278	>sp|P02817|AMELX_BOVIN Amelogenin, X isoform OS=Bos taurus OX=9913 GN=AMELX PE=1 SV=2	1	hf1_10472_ebo_28_1_261219.ScanId;v=1;d1=11321.11321.2	controllerType=0 controllerNumber=1 scan=11321	27.5632
14969:2	1	S.MPLPPHPGHPGY.I			650.322	2	1299.64	1299.63	0	5.4	17	Non	542.74	398.97	398.97	6.02	1278	>sp|P02817|AMELX_BOVIN Amelogenin, X isoform OS=Bos taurus OX=9913 GN=AMELX PE=1 SV=2	1	hf1_10472_ebo_28_1_261219.ScanId;v=1;d1=11985.11985.2	controllerType=0 controllerNumber=1 scan=11985	28.7251
14655:2	1	S.MPLPPHPGHPGY.I			650.323	2	1299.64	1299.63	0	7.1	17	Non	596.13	409.03	409.03	7.69	1278	>sp|P02817|AMELX_BOVIN Amelogenin, X isoform OS=Bos taurus OX=9913 GN=AMELX PE=1 SV=2	1	hf1_10472_ebo_28_1_261219.ScanId;v=1;d1=11785.11785.2	controllerType=0 controllerNumber=1 scan=11785	28.3756
12010:3	1	S.MP[+15.995]LPPHPGHPGY.I		P[+16]	439.216	3	1315.63	1315.63	0	6.3	17	Non	140.27	140.27	4	1.49	1278	>sp|P02817|AMELX_BOVIN Amelogenin, X isoform OS=Bos taurus OX=9913 GN=AMELX PE=1 SV=2	1	hf1_10472_ebo_28_1_261219.ScanId;v=1;d1=9982.9982.2	controllerType=0 controllerNumber=1 scan=9982	25.2125
00477:3	1	S.MP[+15.995]LPPHPGHPGY.I		P[+16]	439.215	3	1315.63	1315.63	0	4.3	17	Non	173.16	173.16	5.8	2.18	1278	>sp|P02817|AMELX_BOVIN Amelogenin, X isoform OS=Bos taurus OX=9913 GN=AMELX PE=1 SV=2	1	hf1_10472_ebo_28_1_261219.ScanId;v=1;d1=1897.1897.3	controllerType=0 controllerNumber=1 scan=1897	10.1617
11749:2	1	S.M[+15.995]PLPPHPGHPGY.I		M[+16]	658.321	2	1315.63	1315.63	0	6.7	17	Non	311	287.25	5.66	4.43	1278	>sp|P02817|AMELX_BOVIN Amelogenin, X isoform OS=Bos taurus OX=9913 GN=AMELX PE=1 SV=2	1	hf1_10472_ebo_28_1_261219.ScanId;v=1;d1=9806.9806.2	controllerType=0 controllerNumber=1 scan=9806	24.9075
11206:2	1	S.M[+15.995]PLPPHPGHPGY.I		M[+16]	658.32	2	1315.63	1315.63	0	5.3	17	Non	327.01	232.72	63.21	4.11	1278	>sp|P02817|AMELX_BOVIN Amelogenin, X isoform OS=Bos taurus OX=9913 GN=AMELX PE=1 SV=2	1	hf1_10472_ebo_28_1_261219.ScanId;v=1;d1=9432.9432.4	controllerType=0 controllerNumber=1 scan=9432	24.2502
09613:3	1	S.M[+15.995]PLPPHPGHPGY.I		M[+16]	439.216	3	1315.63	1315.63	0	6.5	17	Non	362.77	297.42	11.27	5.05	1278	>sp|P02817|AMELX_BOVIN Amelogenin, X isoform OS=Bos taurus OX=9913 GN=AMELX PE=1 SV=2	1	hf1_10472_ebo_28_1_261219.ScanId;v=1;d1=8356.8356.3	controllerType=0 controllerNumber=1 scan=8356	22.3701
11375:2	1	S.M[+15.995]PLPPHPGHPGY.I		M[+16]	658.32	2	1315.63	1315.63	0	5.3	17	Non	375.82	307.51	18.11	4.56	1278	>sp|P02817|AMELX_BOVIN Amelogenin, X isoform OS=Bos taurus OX=9913 GN=AMELX PE=1 SV=2	1	hf1_10472_ebo_28_1_261219.ScanId;v=1;d1=9552.9552.2	controllerType=0 controllerNumber=1 scan=9552	24.4611
11097:2	1	S.M[+15.995]PLPPHPGHPGY.I		M[+16]	658.319	2	1315.63	1315.63	0	4.9	17	Non	441.11	279.72	62.66	4.67	1278	>sp|P02817|AMELX_BOVIN Amelogenin, X isoform OS=Bos taurus OX=9913 GN=AMELX PE=1 SV=2	1	hf1_10472_ebo_28_1_261219.ScanId;v=1;d1=9355.9355.2	controllerType=0 controllerNumber=1 scan=9355	24.1148
09821:2	1	S.M[+15.995]PLPPHPGHPGY.I		M[+16]	658.32	2	1315.63	1315.63	0	5.4	17	Non	476.57	373.01	68.84	5.83	1278	>sp|P02817|AMELX_BOVIN Amelogenin, X isoform OS=Bos taurus OX=9913 GN=AMELX PE=1 SV=2	1	hf1_10472_ebo_28_1_261219.ScanId;v=1;d1=8495.8495.2	controllerType=0 controllerNumber=1 scan=8495	22.6108
11951:3	1	S.M[+15.995]PLPPHPGHPGY.I		M[+16]	439.216	3	1315.63	1315.63	0	6.3	17	Non	477.34	399.18	25.81	5.88	1278	>sp|P02817|AMELX_BOVIN Amelogenin, X isoform OS=Bos taurus OX=9913 GN=AMELX PE=1 SV=2	1	hf1_10472_ebo_28_1_261219.ScanId;v=1;d1=9944.9944.3	controllerType=0 controllerNumber=1 scan=9944	25.1488
11660:3	1	S.M[+15.995]PLPPHPGHPGY.I		M[+16]	439.216	3	1315.63	1315.63	0	5.8	17	Non	485.1	377.14	45.69	6.58	1278	>sp|P02817|AMELX_BOVIN Amelogenin, X isoform OS=Bos taurus OX=9913 GN=AMELX PE=1 SV=2	1	hf1_10472_ebo_28_1_261219.ScanId;v=1;d1=9746.9746.3	controllerType=0 controllerNumber=1 scan=9746	24.8039
09913:3	1	S.M[+15.995]PLPPHPGHPGY.I		M[+16]	439.216	3	1315.63	1315.63	0	5.6	17	Non	509.14	415.08	34.05	6.58	1278	>sp|P02817|AMELX_BOVIN Amelogenin, X isoform OS=Bos taurus OX=9913 GN=AMELX PE=1 SV=2	1	hf1_10472_ebo_28_1_261219.ScanId;v=1;d1=8561.8561.3	controllerType=0 controllerNumber=1 scan=8561	22.7281
10216:3	1	S.M[+15.995]PLPPHPGHPGY.I		M[+16]	439.216	3	1315.63	1315.63	0	6.1	17	Non	526.1	468.62	32.44	6.69	1278	>sp|P02817|AMELX_BOVIN Amelogenin, X isoform OS=Bos taurus OX=9913 GN=AMELX PE=1 SV=2	1	hf1_10472_ebo_28_1_261219.ScanId;v=1;d1=8759.8759.3	controllerType=0 controllerNumber=1 scan=8759	23.0718
11374:3	1	S.M[+15.995]PLPPHPGHPGY.I		M[+16]	439.216	3	1315.63	1315.63	0	5.3	17	Non	529.28	474.94	29.88	6.69	1278	>sp|P02817|AMELX_BOVIN Amelogenin, X isoform OS=Bos taurus OX=9913 GN=AMELX PE=1 SV=2	1	hf1_10472_ebo_28_1_261219.ScanId;v=1;d1=9551.9551.3	controllerType=0 controllerNumber=1 scan=9551	24.4596
11089:3	1	S.M[+15.995]PLPPHPGHPGY.I		M[+16]	439.216	3	1315.63	1315.63	0	5.1	17	Non	535.32	477.09	31.28	6.69	1278	>sp|P02817|AMELX_BOVIN Amelogenin, X isoform OS=Bos taurus OX=9913 GN=AMELX PE=1 SV=2	1	hf1_10472_ebo_28_1_261219.ScanId;v=1;d1=9350.9350.3	controllerType=0 controllerNumber=1 scan=9350	24.1076
10806:3	1	S.M[+15.995]PLPPHPGHPGY.I		M[+16]	439.216	3	1315.63	1315.63	0	6.3	17	Non	535.9	478.26	31.94	6.69	1278	>sp|P02817|AMELX_BOVIN Amelogenin, X isoform OS=Bos taurus OX=9913 GN=AMELX PE=1 SV=2	1	hf1_10472_ebo_28_1_261219.ScanId;v=1;d1=9155.9155.3	controllerType=0 controllerNumber=1 scan=9155	23.7623
10706:2	1	S.M[+15.995]PLPPHPGHPGY.I		M[+16]	658.32	2	1315.63	1315.63	0	6	17	Non	544.62	404.54	71.77	6.64	1278	>sp|P02817|AMELX_BOVIN Amelogenin, X isoform OS=Bos taurus OX=9913 GN=AMELX PE=1 SV=2	1	hf1_10472_ebo_28_1_261219.ScanId;v=1;d1=9089.9089.2	controllerType=0 controllerNumber=1 scan=9089	23.6479
10409:2	1	S.M[+15.995]PLPPHPGHPGY.I		M[+16]	658.321	2	1315.63	1315.63	0	7.1	17	Non	548.9	436.61	58.05	6.9	1278	>sp|P02817|AMELX_BOVIN Amelogenin, X isoform OS=Bos taurus OX=9913 GN=AMELX PE=1 SV=2	1	hf1_10472_ebo_28_1_261219.ScanId;v=1;d1=8891.8891.2	controllerType=0 controllerNumber=1 scan=8891	23.3024
10117:2	1	S.M[+15.995]PLPPHPGHPGY.I		M[+16]	658.32	2	1315.63	1315.63	0	5.7	17	Non	553.78	440.1	61.31	6.02	1278	>sp|P02817|AMELX_BOVIN Amelogenin, X isoform OS=Bos taurus OX=9913 GN=AMELX PE=1 SV=2	1	hf1_10472_ebo_28_1_261219.ScanId;v=1;d1=8694.8694.2	controllerType=0 controllerNumber=1 scan=8694	22.9578
10505:3	1	S.M[+15.995]PLPPHPGHPGY.I		M[+16]	439.216	3	1315.63	1315.63	0	6.7	17	Non	562.54	516.55	35.36	7.74	1278	>sp|P02817|AMELX_BOVIN Amelogenin, X isoform OS=Bos taurus OX=9913 GN=AMELX PE=1 SV=2	1	hf1_10472_ebo_28_1_261219.ScanId;v=1;d1=8957.8957.3	controllerType=0 controllerNumber=1 scan=8957	23.4179
18633:3	1	S.MPLPPHPGHPGYI.N			471.579	3	1412.72	1412.71	0	4.7	17	Non	340.66	239.44	239.44	4.16	1278	>sp|P02817|AMELX_BOVIN Amelogenin, X isoform OS=Bos taurus OX=9913 GN=AMELX PE=1 SV=2	1	hf1_10472_ebo_28_1_261219.ScanId;v=1;d1=14480.14480.6	controllerType=0 controllerNumber=1 scan=14480	33.0561
15117:3	1	S.MP[+15.995]LPPHPGHPGYI.N		P[+16]	476.911	3	1428.72	1428.71	0	6.6	17	Non	152.67	152.67	5.8	2.17	1278	>sp|P02817|AMELX_BOVIN Amelogenin, X isoform OS=Bos taurus OX=9913 GN=AMELX PE=1 SV=2	1	hf1_10472_ebo_28_1_261219.ScanId;v=1;d1=12086.12086.3	controllerType=0 controllerNumber=1 scan=12086	28.8976
15082:3	1	S.MP[+15.995]LPPHPGHPGYI.N		P[+16]	476.911	3	1428.72	1428.71	0	5.6	17	Non	266.24	235.82	4	3.86	1278	>sp|P02817|AMELX_BOVIN Amelogenin, X isoform OS=Bos taurus OX=9913 GN=AMELX PE=1 SV=2	1	hf1_10472_ebo_28_1_261219.ScanId;v=1;d1=12062.12062.3	controllerType=0 controllerNumber=1 scan=12062	28.8566
14758:3	1	S.M[+15.995]PLPPHPGHPGYI.N		M[+16]	476.911	3	1428.72	1428.71	0	6.5	17	Non	325.29	309.52	19.38	4.55	1278	>sp|P02817|AMELX_BOVIN Amelogenin, X isoform OS=Bos taurus OX=9913 GN=AMELX PE=1 SV=2	1	hf1_10472_ebo_28_1_261219.ScanId;v=1;d1=11849.11849.3	controllerType=0 controllerNumber=1 scan=11849	28.4872
00806:3	1	S.MPLPPHPGHPGYIN.F			509.593	3	1526.76	1526.76	0	4.3	17	Non	92.32	22.18	22.18	0.22	1278	>sp|P02817|AMELX_BOVIN Amelogenin, X isoform OS=Bos taurus OX=9913 GN=AMELX PE=1 SV=2	1	hf1_10472_ebo_28_1_261219.ScanId;v=1;d1=2203.2203.3	controllerType=0 controllerNumber=1 scan=2203	11.0844
00659:3	1	S.MPLPPHPGHPGYIN.F			509.592	3	1526.76	1526.76	0	3.2	17	Non	138.28	95.36	95.36	1.01	1278	>sp|P02817|AMELX_BOVIN Amelogenin, X isoform OS=Bos taurus OX=9913 GN=AMELX PE=1 SV=2	1	hf1_10472_ebo_28_1_261219.ScanId;v=1;d1=2068.2068.3	controllerType=0 controllerNumber=1 scan=2068	10.6714
17384:3	1	S.MPLPPHPGHPGYIN.F			509.594	3	1526.77	1526.76	0	6.3	17	Non	435.55	328.99	328.99	5.04	1278	>sp|P02817|AMELX_BOVIN Amelogenin, X isoform OS=Bos taurus OX=9913 GN=AMELX PE=1 SV=2	1	hf1_10472_ebo_28_1_261219.ScanId;v=1;d1=13626.13626.3	controllerType=0 controllerNumber=1 scan=13626	31.5696
17082:3	1	S.MPLPPHPGHPGYIN.F			509.594	3	1526.77	1526.76	0	6.6	17	Non	469.07	348.57	348.57	5.28	1278	>sp|P02817|AMELX_BOVIN Amelogenin, X isoform OS=Bos taurus OX=9913 GN=AMELX PE=1 SV=2	1	hf1_10472_ebo_28_1_261219.ScanId;v=1;d1=13422.13422.3	controllerType=0 controllerNumber=1 scan=13422	31.2153
16986:2	1	S.MPLPPHPGHPGYIN.F			763.887	2	1526.77	1526.76	0	6.3	17	Non	526.94	354	354	5.11	1278	>sp|P02817|AMELX_BOVIN Amelogenin, X isoform OS=Bos taurus OX=9913 GN=AMELX PE=1 SV=2	1	hf1_10472_ebo_28_1_261219.ScanId;v=1;d1=13358.13358.2	controllerType=0 controllerNumber=1 scan=13358	31.1072
16789:3	1	S.MPLPPHPGHPGYIN.F			509.594	3	1526.77	1526.76	0	5.7	17	Non	535.36	425.42	425.42	6.69	1278	>sp|P02817|AMELX_BOVIN Amelogenin, X isoform OS=Bos taurus OX=9913 GN=AMELX PE=1 SV=2	1	hf1_10472_ebo_28_1_261219.ScanId;v=1;d1=13220.13220.3	controllerType=0 controllerNumber=1 scan=13220	30.8682
16529:3	1	S.MPLPPHPGHPGYIN.F			509.593	3	1526.76	1526.76	0	4.3	17	Non	538.02	429.34	429.34	6.44	1278	>sp|P02817|AMELX_BOVIN Amelogenin, X isoform OS=Bos taurus OX=9913 GN=AMELX PE=1 SV=2	1	hf1_10472_ebo_28_1_261219.ScanId;v=1;d1=13023.13023.3	controllerType=0 controllerNumber=1 scan=13023	30.523
15915:3	1	S.MPLPPHPGHPGYIN.F			509.594	3	1526.77	1526.76	0	5.8	17	Non	560.07	445.52	445.52	7.48	1278	>sp|P02817|AMELX_BOVIN Amelogenin, X isoform OS=Bos taurus OX=9913 GN=AMELX PE=1 SV=2	1	hf1_10472_ebo_28_1_261219.ScanId;v=1;d1=12611.12611.3	controllerType=0 controllerNumber=1 scan=12611	29.8164
16220:3	1	S.MPLPPHPGHPGYIN.F			509.594	3	1526.77	1526.76	0	6.5	17	Non	579.27	477.85	477.85	7.74	1278	>sp|P02817|AMELX_BOVIN Amelogenin, X isoform OS=Bos taurus OX=9913 GN=AMELX PE=1 SV=2	1	hf1_10472_ebo_28_1_261219.ScanId;v=1;d1=12816.12816.3	controllerType=0 controllerNumber=1 scan=12816	30.1719
16691:2	1	S.MPLPPHPGHPGYIN.F			763.885	2	1526.76	1526.76	0	3.8	17	Non	629.4	454.72	454.72	7.56	1278	>sp|P02817|AMELX_BOVIN Amelogenin, X isoform OS=Bos taurus OX=9913 GN=AMELX PE=1 SV=2	1	hf1_10472_ebo_28_1_261219.ScanId;v=1;d1=13150.13150.2	controllerType=0 controllerNumber=1 scan=13150	30.7487
16409:2	1	S.MPLPPHPGHPGYIN.F			763.885	2	1526.76	1526.76	0	4.1	17	Non	656.44	461.97	461.97	9.18	1278	>sp|P02817|AMELX_BOVIN Amelogenin, X isoform OS=Bos taurus OX=9913 GN=AMELX PE=1 SV=2	1	hf1_10472_ebo_28_1_261219.ScanId;v=1;d1=12943.12943.2	controllerType=0 controllerNumber=1 scan=12943	30.3896
16113:2	1	S.MPLPPHPGHPGYIN.F			763.887	2	1526.77	1526.76	0	6.3	17	Non	710.79	504.61	504.61	10.43	1278	>sp|P02817|AMELX_BOVIN Amelogenin, X isoform OS=Bos taurus OX=9913 GN=AMELX PE=1 SV=2	1	hf1_10472_ebo_28_1_261219.ScanId;v=1;d1=12744.12744.2	controllerType=0 controllerNumber=1 scan=12744	30.0459
01074:3	1	S.MP[+15.995]LPPHPGHPGYIN.F		P[+16]	514.925	3	1542.76	1542.75	0	6	17	Non	10.45	10.45	4	0.28	1278	>sp|P02817|AMELX_BOVIN Amelogenin, X isoform OS=Bos taurus OX=9913 GN=AMELX PE=1 SV=2	1	hf1_10472_ebo_28_1_261219.ScanId;v=1;d1=2447.2447.3	controllerType=0 controllerNumber=1 scan=2447	11.8326
00584:3	1	S.MP[+15.995]LPPHPGHPGYIN.F		P[+16]	514.925	3	1542.76	1542.75	0	4.6	17	Non	68	68	4	0.96	1278	>sp|P02817|AMELX_BOVIN Amelogenin, X isoform OS=Bos taurus OX=9913 GN=AMELX PE=1 SV=2	1	hf1_10472_ebo_28_1_261219.ScanId;v=1;d1=1993.1993.3	controllerType=0 controllerNumber=1 scan=1993	10.4304
00843:3	1	S.MP[+15.995]LPPHPGHPGYIN.F		P[+16]	514.925	3	1542.76	1542.75	0	5.3	17	Non	82.28	82.28	4	0.96	1278	>sp|P02817|AMELX_BOVIN Amelogenin, X isoform OS=Bos taurus OX=9913 GN=AMELX PE=1 SV=2	1	hf1_10472_ebo_28_1_261219.ScanId;v=1;d1=2232.2232.3	controllerType=0 controllerNumber=1 scan=2232	11.1452
13034:2	1	S.MP[+15.995]LPPHPGHPGYIN.F		P[+16]	771.885	2	1542.76	1542.75	0	6.5	17	Non	113.55	113.55	22.25	1.17	1278	>sp|P02817|AMELX_BOVIN Amelogenin, X isoform OS=Bos taurus OX=9913 GN=AMELX PE=1 SV=2	1	hf1_10472_ebo_28_1_261219.ScanId;v=1;d1=10701.10701.3	controllerType=0 controllerNumber=1 scan=10701	26.4787
00065:3	1	S.MP[+15.995]LPPHPGHPGYIN.F		P[+16]	514.926	3	1542.76	1542.75	0	7.5	17	Non	164.54	164.54	4	2.93	1278	>sp|P02817|AMELX_BOVIN Amelogenin, X isoform OS=Bos taurus OX=9913 GN=AMELX PE=1 SV=2	1	hf1_10472_ebo_28_1_261219.ScanId;v=1;d1=138.138.3	controllerType=0 controllerNumber=1 scan=138	0.6003
17822:2	1	S.MPLPPHPGHPGYIN[+0.984].F		N[+1]	764.378	2	1527.75	1527.74	0	5.3	17	Non	179.73	179.73	179.73	2.47	1278	>sp|P02817|AMELX_BOVIN Amelogenin, X isoform OS=Bos taurus OX=9913 GN=AMELX PE=1 SV=2	1	hf1_10472_ebo_28_1_261219.ScanId;v=1;d1=13922.13922.3	controllerType=0 controllerNumber=1 scan=13922	32.0845
15650:3	1	S.MPLPPHPGHP[+15.995]GYIN.F		P[+16]	514.926	3	1542.76	1542.75	0	6.5	17	Non	212.07	148.33	1.72	2.3	1278	>sp|P02817|AMELX_BOVIN Amelogenin, X isoform OS=Bos taurus OX=9913 GN=AMELX PE=1 SV=2	1	hf1_10472_ebo_28_1_261219.ScanId;v=1;d1=12436.12436.3	controllerType=0 controllerNumber=1 scan=12436	29.5119
15994:3	1	S.MPLPPHPGHP[+15.995]GYIN.F		P[+16]	514.925	3	1542.76	1542.75	0	5.4	17	Non	244.55	185.43	0	3.33	1278	>sp|P02817|AMELX_BOVIN Amelogenin, X isoform OS=Bos taurus OX=9913 GN=AMELX PE=1 SV=2	1	hf1_10472_ebo_28_1_261219.ScanId;v=1;d1=12665.12665.3	controllerType=0 controllerNumber=1 scan=12665	29.9113
00415:3	1	S.MP[+15.995]LPPHPGHPGYIN.F		P[+16]	514.924	3	1542.76	1542.75	0	3.4	17	Non	304.04	304.04	5.8	3.98	1278	>sp|P02817|AMELX_BOVIN Amelogenin, X isoform OS=Bos taurus OX=9913 GN=AMELX PE=1 SV=2	1	hf1_10472_ebo_28_1_261219.ScanId;v=1;d1=1853.1853.3	controllerType=0 controllerNumber=1 scan=1853	10.0851
14966:3	1	S.MPLP[+15.995]PHPGHPGYIN.F		P[+16]	514.926	3	1542.76	1542.75	0	6.3	17	Non	324	265.08	2.49	4.21	1278	>sp|P02817|AMELX_BOVIN Amelogenin, X isoform OS=Bos taurus OX=9913 GN=AMELX PE=1 SV=2	1	hf1_10472_ebo_28_1_261219.ScanId;v=1;d1=11982.11982.3	controllerType=0 controllerNumber=1 scan=11982	28.7205
14647:3	1	S.MP[+15.995]LPPHPGHPGYIN.F		P[+16]	514.926	3	1542.76	1542.75	0	7.6	17	Non	364.87	343.9	5.8	5.03	1278	>sp|P02817|AMELX_BOVIN Amelogenin, X isoform OS=Bos taurus OX=9913 GN=AMELX PE=1 SV=2	1	hf1_10472_ebo_28_1_261219.ScanId;v=1;d1=11780.11780.3	controllerType=0 controllerNumber=1 scan=11780	28.3681
13756:2	1	S.M[+15.995]PLPPHPGHPGYIN.F		M[+16]	771.884	2	1542.76	1542.75	0	5.6	17	Non	371.7	371.7	34.24	5.59	1278	>sp|P02817|AMELX_BOVIN Amelogenin, X isoform OS=Bos taurus OX=9913 GN=AMELX PE=1 SV=2	1	hf1_10472_ebo_28_1_261219.ScanId;v=1;d1=11191.11191.2	controllerType=0 controllerNumber=1 scan=11191	27.3391
15259:3	1	S.MPLPPHPGHP[+15.995]GYIN.F		P[+16]	514.926	3	1542.76	1542.75	0	6.3	17	Non	378.87	290.67	7.93	4.61	1278	>sp|P02817|AMELX_BOVIN Amelogenin, X isoform OS=Bos taurus OX=9913 GN=AMELX PE=1 SV=2	1	hf1_10472_ebo_28_1_261219.ScanId;v=1;d1=12179.12179.3	controllerType=0 controllerNumber=1 scan=12179	29.0604
14340:3	1	S.MP[+15.995]LPPHPGHPGYIN.F		P[+16]	514.926	3	1542.76	1542.75	0	6.3	17	Non	398.26	398.26	5.8	5.81	1278	>sp|P02817|AMELX_BOVIN Amelogenin, X isoform OS=Bos taurus OX=9913 GN=AMELX PE=1 SV=2	1	hf1_10472_ebo_28_1_261219.ScanId;v=1;d1=11579.11579.3	controllerType=0 controllerNumber=1 scan=11579	28.0166
13350:3	1	S.M[+15.995]PLPPHPGHPGYIN.F		M[+16]	514.925	3	1542.76	1542.75	0	5.6	17	Non	425.24	425.24	14.41	5.9	1278	>sp|P02817|AMELX_BOVIN Amelogenin, X isoform OS=Bos taurus OX=9913 GN=AMELX PE=1 SV=2	1	hf1_10472_ebo_28_1_261219.ScanId;v=1;d1=10915.10915.3	controllerType=0 controllerNumber=1 scan=10915	26.8576
13647:3	1	S.M[+15.995]PLPPHPGHPGYIN.F		M[+16]	514.926	3	1542.76	1542.75	0	6.4	17	Non	425.75	425.75	4.42	6.15	1278	>sp|P02817|AMELX_BOVIN Amelogenin, X isoform OS=Bos taurus OX=9913 GN=AMELX PE=1 SV=2	1	hf1_10472_ebo_28_1_261219.ScanId;v=1;d1=11116.11116.3	controllerType=0 controllerNumber=1 scan=11116	27.212
13955:3	1	S.M[+15.995]PLPPHPGHPGYIN.F		M[+16]	514.925	3	1542.76	1542.75	0	5.7	17	Non	441.3	441.3	2.28	5.88	1278	>sp|P02817|AMELX_BOVIN Amelogenin, X isoform OS=Bos taurus OX=9913 GN=AMELX PE=1 SV=2	1	hf1_10472_ebo_28_1_261219.ScanId;v=1;d1=11325.11325.3	controllerType=0 controllerNumber=1 scan=11325	27.5687
11912:3	1	S.M[+15.995]PLPPHPGHPGYIN.F		M[+16]	514.925	3	1542.76	1542.75	0	6.2	17	Non	442.26	442.26	1.73	5.88	1278	>sp|P02817|AMELX_BOVIN Amelogenin, X isoform OS=Bos taurus OX=9913 GN=AMELX PE=1 SV=2	1	hf1_10472_ebo_28_1_261219.ScanId;v=1;d1=9915.9915.3	controllerType=0 controllerNumber=1 scan=9915	25.0975
12198:3	1	S.MP[+15.995]LPPHPGHPGYIN.F		P[+16]	514.924	3	1542.76	1542.75	0	3.9	17	Non	446.36	446.36	4	6.25	1278	>sp|P02817|AMELX_BOVIN Amelogenin, X isoform OS=Bos taurus OX=9913 GN=AMELX PE=1 SV=2	1	hf1_10472_ebo_28_1_261219.ScanId;v=1;d1=10117.10117.3	controllerType=0 controllerNumber=1 scan=10117	25.4507
13056:3	1	S.MP[+15.995]LPPHPGHPGYIN.F		P[+16]	514.925	3	1542.76	1542.75	0	5.3	17	Non	459.7	459.7	4	5.88	1278	>sp|P02817|AMELX_BOVIN Amelogenin, X isoform OS=Bos taurus OX=9913 GN=AMELX PE=1 SV=2	1	hf1_10472_ebo_28_1_261219.ScanId;v=1;d1=10716.10716.3	controllerType=0 controllerNumber=1 scan=10716	26.5066
12465:3	1	S.M[+15.995]PLPPHPGHPGYIN.F		M[+16]	514.926	3	1542.76	1542.75	0	6.7	17	Non	464.43	464.43	4.74	6.76	1278	>sp|P02817|AMELX_BOVIN Amelogenin, X isoform OS=Bos taurus OX=9913 GN=AMELX PE=1 SV=2	1	hf1_10472_ebo_28_1_261219.ScanId;v=1;d1=10315.10315.3	controllerType=0 controllerNumber=1 scan=10315	25.8049
17409:2	1	S.MPLPPHPGHPGYIN[+0.984].F		N[+1]	764.375	2	1527.74	1527.74	0	1.1	17	Non	471.46	453.06	453.06	4.9	1278	>sp|P02817|AMELX_BOVIN Amelogenin, X isoform OS=Bos taurus OX=9913 GN=AMELX PE=1 SV=2	1	hf1_10472_ebo_28_1_261219.ScanId;v=1;d1=13643.13643.2	controllerType=0 controllerNumber=1 scan=13643	31.6006
12756:3	1	S.MP[+15.995]LPPHPGHPGYIN.F		P[+16]	514.926	3	1542.76	1542.75	0	6.7	17	Non	471.56	471.56	4	6.76	1278	>sp|P02817|AMELX_BOVIN Amelogenin, X isoform OS=Bos taurus OX=9913 GN=AMELX PE=1 SV=2	1	hf1_10472_ebo_28_1_261219.ScanId;v=1;d1=10514.10514.3	controllerType=0 controllerNumber=1 scan=10514	26.1553
13452:2	1	S.M[+15.995]PLPPHPGHPGYIN.F		M[+16]	771.884	2	1542.76	1542.75	0	5.3	17	Non	473.2	446.67	43.14	5.78	1278	>sp|P02817|AMELX_BOVIN Amelogenin, X isoform OS=Bos taurus OX=9913 GN=AMELX PE=1 SV=2	1	hf1_10472_ebo_28_1_261219.ScanId;v=1;d1=10986.10986.2	controllerType=0 controllerNumber=1 scan=10986	26.9814
11975:2	1	S.M[+15.995]PLPPHPGHPGYIN.F		M[+16]	771.884	2	1542.76	1542.75	0	5.3	17	Non	483.24	432.39	28.85	5.91	1278	>sp|P02817|AMELX_BOVIN Amelogenin, X isoform OS=Bos taurus OX=9913 GN=AMELX PE=1 SV=2	1	hf1_10472_ebo_28_1_261219.ScanId;v=1;d1=9960.9960.2	controllerType=0 controllerNumber=1 scan=9960	25.1756
13154:2	1	S.M[+15.995]PLPPHPGHPGYIN.F		M[+16]	771.885	2	1542.76	1542.75	0	7.4	17	Non	495.86	486.89	47.61	5.93	1278	>sp|P02817|AMELX_BOVIN Amelogenin, X isoform OS=Bos taurus OX=9913 GN=AMELX PE=1 SV=2	1	hf1_10472_ebo_28_1_261219.ScanId;v=1;d1=10783.10783.2	controllerType=0 controllerNumber=1 scan=10783	26.6247
17385:3	1	S.MPLPPHPGHPGYIN[+0.984].F		N[+1]	509.92	3	1527.75	1527.74	0	2.8	17	Non	525.3	468.5	468.5	5.81	1278	>sp|P02817|AMELX_BOVIN Amelogenin, X isoform OS=Bos taurus OX=9913 GN=AMELX PE=1 SV=2	1	hf1_10472_ebo_28_1_261219.ScanId;v=1;d1=13626.13626.3	controllerType=0 controllerNumber=1 scan=13626	31.5696
12548:2	1	S.M[+15.995]PLPPHPGHPGYIN.F		M[+16]	771.885	2	1542.76	1542.75	0	6.4	17	Non	540.17	525.19	59.76	6.27	1278	>sp|P02817|AMELX_BOVIN Amelogenin, X isoform OS=Bos taurus OX=9913 GN=AMELX PE=1 SV=2	1	hf1_10472_ebo_28_1_261219.ScanId;v=1;d1=10374.10374.2	controllerType=0 controllerNumber=1 scan=10374	25.9094
12276:2	1	S.M[+15.995]PLPPHPGHPGYIN.F		M[+16]	771.883	2	1542.76	1542.75	0	4.5	17	Non	547.99	522.75	55.21	6.02	1278	>sp|P02817|AMELX_BOVIN Amelogenin, X isoform OS=Bos taurus OX=9913 GN=AMELX PE=1 SV=2	1	hf1_10472_ebo_28_1_261219.ScanId;v=1;d1=10178.10178.2	controllerType=0 controllerNumber=1 scan=10178	25.5624
12842:2	1	S.M[+15.995]PLPPHPGHPGYIN.F		M[+16]	771.884	2	1542.76	1542.75	0	5.5	17	Non	581.01	560.98	50.49	6.81	1278	>sp|P02817|AMELX_BOVIN Amelogenin, X isoform OS=Bos taurus OX=9913 GN=AMELX PE=1 SV=2	1	hf1_10472_ebo_28_1_261219.ScanId;v=1;d1=10573.10573.2	controllerType=0 controllerNumber=1 scan=10573	26.2605
10765:3	1	S.MP[+15.995]LPPHPGHP[+15.995]GYIN.F		P[+16]*2	520.257	3	1558.76	1558.75	0	6.1	17	Non	144.88	144.88	4	1.49	1278	>sp|P02817|AMELX_BOVIN Amelogenin, X isoform OS=Bos taurus OX=9913 GN=AMELX PE=1 SV=2	1	hf1_10472_ebo_28_1_261219.ScanId;v=1;d1=9129.9129.3	controllerType=0 controllerNumber=1 scan=9129	23.7157
11726:3	1	S.MP[+15.995]LPPHPGHP[+15.995]GYIN.F		P[+16]*2	520.257	3	1558.76	1558.75	0	6.6	17	Non	189.4	189.4	5.8	2.26	1278	>sp|P02817|AMELX_BOVIN Amelogenin, X isoform OS=Bos taurus OX=9913 GN=AMELX PE=1 SV=2	1	hf1_10472_ebo_28_1_261219.ScanId;v=1;d1=9791.9791.3	controllerType=0 controllerNumber=1 scan=9791	24.8823
11328:3	1	S.MP[+15.995]LPPHPGHP[+15.995]GYIN.F		P[+16]*2	520.257	3	1558.76	1558.75	0	5.7	17	Non	263.07	263.07	4	4.14	1278	>sp|P02817|AMELX_BOVIN Amelogenin, X isoform OS=Bos taurus OX=9913 GN=AMELX PE=1 SV=2	1	hf1_10472_ebo_28_1_261219.ScanId;v=1;d1=9518.9518.3	controllerType=0 controllerNumber=1 scan=9518	24.4025
00117:3	1	S.MPLPPHPGHPGYINF.S			558.615	3	1673.83	1673.83	0	2.5	17	Non	2.01	2.01	2.01	0.28	1278	>sp|P02817|AMELX_BOVIN Amelogenin, X isoform OS=Bos taurus OX=9913 GN=AMELX PE=1 SV=2	1	hf1_10472_ebo_28_1_261219.ScanId;v=1;d1=510.510.3	controllerType=0 controllerNumber=1 scan=510	2.7396
45773:2	1	S.MPLPPHPGHPGYINF.S			837.42	2	1673.83	1673.83	0	3.9	17	Non	12.42	12.42	12.42	0.27	1278	>sp|P02817|AMELX_BOVIN Amelogenin, X isoform OS=Bos taurus OX=9913 GN=AMELX PE=1 SV=2	1	hf1_10472_ebo_28_1_261219.ScanId;v=1;d1=32783.32783.4	controllerType=0 controllerNumber=1 scan=32783	65.0916
00535:2	1	S.MPLPPHPGHPGYINF.S			837.421	2	1673.83	1673.83	0	5.5	17	Non	27.96	27.96	27.96	1.01	1278	>sp|P02817|AMELX_BOVIN Amelogenin, X isoform OS=Bos taurus OX=9913 GN=AMELX PE=1 SV=2	1	hf1_10472_ebo_28_1_261219.ScanId;v=1;d1=1941.1941.3	controllerType=0 controllerNumber=1 scan=1941	10.2445
00266:3	1	S.MPLPPHPGHPGYINF.S			558.615	3	1673.83	1673.83	0	3.5	17	Non	33.78	33.78	33.78	0.28	1278	>sp|P02817|AMELX_BOVIN Amelogenin, X isoform OS=Bos taurus OX=9913 GN=AMELX PE=1 SV=2	1	hf1_10472_ebo_28_1_261219.ScanId;v=1;d1=977.977.3	controllerType=0 controllerNumber=1 scan=977	5.1939
00105:3	1	S.MPLPPHPGHPGYINF.S			558.616	3	1673.83	1673.83	0	5.1	17	Non	40.46	40.46	40.46	0.46	1278	>sp|P02817|AMELX_BOVIN Amelogenin, X isoform OS=Bos taurus OX=9913 GN=AMELX PE=1 SV=2	1	hf1_10472_ebo_28_1_261219.ScanId;v=1;d1=392.392.3	controllerType=0 controllerNumber=1 scan=392	2.0448
14335:3	1	S.MPLPPHPGHPGYINF.S			558.617	3	1673.84	1673.83	0	6.5	17	Non	42.53	42.53	42.53	0.26	1278	>sp|P02817|AMELX_BOVIN Amelogenin, X isoform OS=Bos taurus OX=9913 GN=AMELX PE=1 SV=2	1	hf1_10472_ebo_28_1_261219.ScanId;v=1;d1=11576.11576.3	controllerType=0 controllerNumber=1 scan=11576	28.0122
01111:2	1	S.MPLPPHPGHPGYINF.S			837.423	2	1673.84	1673.83	0	8.3	17	Non	48.7	48.7	48.7	1.07	1278	>sp|P02817|AMELX_BOVIN Amelogenin, X isoform OS=Bos taurus OX=9913 GN=AMELX PE=1 SV=2	1	hf1_10472_ebo_28_1_261219.ScanId;v=1;d1=2484.2484.3	controllerType=0 controllerNumber=1 scan=2484	11.9668
00296:3	1	S.MPLPPHPGHPGYINF.S			558.615	3	1673.83	1673.83	0	2.1	17	Non	51.73	51.73	51.73	0.62	1278	>sp|P02817|AMELX_BOVIN Amelogenin, X isoform OS=Bos taurus OX=9913 GN=AMELX PE=1 SV=2	1	hf1_10472_ebo_28_1_261219.ScanId;v=1;d1=1211.1211.3	controllerType=0 controllerNumber=1 scan=1211	6.5577
00276:3	1	S.MPLPPHPGHPGYINF.S			558.615	3	1673.83	1673.83	0	3.7	17	Non	60.57	60.57	60.57	0.28	1278	>sp|P02817|AMELX_BOVIN Amelogenin, X isoform OS=Bos taurus OX=9913 GN=AMELX PE=1 SV=2	1	hf1_10472_ebo_28_1_261219.ScanId;v=1;d1=1036.1036.3	controllerType=0 controllerNumber=1 scan=1036	5.532
49507:3	1	S.MPLPPHPGHPGYINF.S			558.615	3	1673.83	1673.83	0	2.8	17	Non	70.08	70.08	70.08	0.96	1278	>sp|P02817|AMELX_BOVIN Amelogenin, X isoform OS=Bos taurus OX=9913 GN=AMELX PE=1 SV=2	1	hf1_10472_ebo_28_1_261219.ScanId;v=1;d1=36618.36618.3	controllerType=0 controllerNumber=1 scan=36618	77.0007
15571:3	1	S.MPLPPHPGHPGYINF.S			558.616	3	1673.83	1673.83	0	4.4	17	Non	73.2	73.2	73.2	0.28	1278	>sp|P02817|AMELX_BOVIN Amelogenin, X isoform OS=Bos taurus OX=9913 GN=AMELX PE=1 SV=2	1	hf1_10472_ebo_28_1_261219.ScanId;v=1;d1=12387.12387.2	controllerType=0 controllerNumber=1 scan=12387	29.4277
48909:3	1	S.MPLPPHPGHPGYINF.S			558.615	3	1673.83	1673.83	0	2.2	17	Non	75.51	75.51	75.51	0.62	1278	>sp|P02817|AMELX_BOVIN Amelogenin, X isoform OS=Bos taurus OX=9913 GN=AMELX PE=1 SV=2	1	hf1_10472_ebo_28_1_261219.ScanId;v=1;d1=35664.35664.3	controllerType=0 controllerNumber=1 scan=35664	72.9076
00305:3	1	S.MPLPPHPGHPGYINF.S			558.614	3	1673.83	1673.83	0	0.9	17	Non	81.33	81.33	81.33	0.62	1278	>sp|P02817|AMELX_BOVIN Amelogenin, X isoform OS=Bos taurus OX=9913 GN=AMELX PE=1 SV=2	1	hf1_10472_ebo_28_1_261219.ScanId;v=1;d1=1270.1270.3	controllerType=0 controllerNumber=1 scan=1270	6.8972
00369:3	1	S.MPLPPHPGHPGYINF.S			558.614	3	1673.83	1673.83	0	0.5	17	Non	86.67	86.67	86.67	0.92	1278	>sp|P02817|AMELX_BOVIN Amelogenin, X isoform OS=Bos taurus OX=9913 GN=AMELX PE=1 SV=2	1	hf1_10472_ebo_28_1_261219.ScanId;v=1;d1=1639.1639.3	controllerType=0 controllerNumber=1 scan=1639	8.9421
00314:3	1	S.MPLPPHPGHPGYINF.S			558.614	3	1673.83	1673.83	0	1.2	17	Non	97.3	97.3	97.3	0.92	1278	>sp|P02817|AMELX_BOVIN Amelogenin, X isoform OS=Bos taurus OX=9913 GN=AMELX PE=1 SV=2	1	hf1_10472_ebo_28_1_261219.ScanId;v=1;d1=1330.1330.3	controllerType=0 controllerNumber=1 scan=1330	7.2373
46147:2	1	S.MPLPPHPGHPGYINF.S			837.421	2	1673.83	1673.83	0	5.3	17	Non	107.08	107.08	107.08	1.17	1278	>sp|P02817|AMELX_BOVIN Amelogenin, X isoform OS=Bos taurus OX=9913 GN=AMELX PE=1 SV=2	1	hf1_10472_ebo_28_1_261219.ScanId;v=1;d1=33102.33102.3	controllerType=0 controllerNumber=1 scan=33102	65.766
00219:3	1	S.MPLPPHPGHPGYINF.S			558.615	3	1673.83	1673.83	0	2.8	17	Non	107.15	107.15	107.15	1.06	1278	>sp|P02817|AMELX_BOVIN Amelogenin, X isoform OS=Bos taurus OX=9913 GN=AMELX PE=1 SV=2	1	hf1_10472_ebo_28_1_261219.ScanId;v=1;d1=735.735.3	controllerType=0 controllerNumber=1 scan=735	3.8268
00289:3	1	S.MPLPPHPGHPGYINF.S			558.615	3	1673.83	1673.83	0	3.6	17	Non	120.81	120.81	120.81	1.06	1278	>sp|P02817|AMELX_BOVIN Amelogenin, X isoform OS=Bos taurus OX=9913 GN=AMELX PE=1 SV=2	1	hf1_10472_ebo_28_1_261219.ScanId;v=1;d1=1152.1152.3	controllerType=0 controllerNumber=1 scan=1152	6.2145
26877:3	1	S.MPLPPHPGHPGYINF.S			558.616	3	1673.83	1673.83	0	5.3	17	Non	124.39	124.39	124.39	2.3	1278	>sp|P02817|AMELX_BOVIN Amelogenin, X isoform OS=Bos taurus OX=9913 GN=AMELX PE=1 SV=2	1	hf1_10472_ebo_28_1_261219.ScanId;v=1;d1=20095.20095.3	controllerType=0 controllerNumber=1 scan=20095	42.7133
46545:2	1	S.MPLPPHPGHPGYINF.S			837.422	2	1673.84	1673.83	0	6.4	17	Non	124.82	124.82	124.82	2.38	1278	>sp|P02817|AMELX_BOVIN Amelogenin, X isoform OS=Bos taurus OX=9913 GN=AMELX PE=1 SV=2	1	hf1_10472_ebo_28_1_261219.ScanId;v=1;d1=33456.33456.4	controllerType=0 controllerNumber=1 scan=33456	66.5829
45606:3	1	S.MPLPPHPGHPGYINF.S			558.616	3	1673.83	1673.83	0	3.9	17	Non	130.24	130.24	130.24	1.51	1278	>sp|P02817|AMELX_BOVIN Amelogenin, X isoform OS=Bos taurus OX=9913 GN=AMELX PE=1 SV=2	1	hf1_10472_ebo_28_1_261219.ScanId;v=1;d1=32647.32647.3	controllerType=0 controllerNumber=1 scan=32647	64.8257
00283:3	1	S.MPLPPHPGHPGYINF.S			558.616	3	1673.83	1673.83	0	5.2	17	Non	131.83	131.83	131.83	2.17	1278	>sp|P02817|AMELX_BOVIN Amelogenin, X isoform OS=Bos taurus OX=9913 GN=AMELX PE=1 SV=2	1	hf1_10472_ebo_28_1_261219.ScanId;v=1;d1=1094.1094.3	controllerType=0 controllerNumber=1 scan=1094	5.8718
49003:3	1	S.MPLPPHPGHPGYINF.S			558.615	3	1673.83	1673.83	0	2.5	17	Non	148.74	148.74	148.74	2.24	1278	>sp|P02817|AMELX_BOVIN Amelogenin, X isoform OS=Bos taurus OX=9913 GN=AMELX PE=1 SV=2	1	hf1_10472_ebo_28_1_261219.ScanId;v=1;d1=35765.35765.3	controllerType=0 controllerNumber=1 scan=35765	73.253
47015:3	1	S.MPLPPHPGHPGYINF.S			558.616	3	1673.84	1673.83	0	5.6	17	Non	149.83	149.83	149.83	2.3	1278	>sp|P02817|AMELX_BOVIN Amelogenin, X isoform OS=Bos taurus OX=9913 GN=AMELX PE=1 SV=2	1	hf1_10472_ebo_28_1_261219.ScanId;v=1;d1=33913.33913.2	controllerType=0 controllerNumber=1 scan=33913	67.9057
41009:3	1	S.MPLPPHPGHPGYINF.S			558.616	3	1673.83	1673.83	0	5.2	17	Non	150.33	150.33	150.33	2.3	1278	>sp|P02817|AMELX_BOVIN Amelogenin, X isoform OS=Bos taurus OX=9913 GN=AMELX PE=1 SV=2	1	hf1_10472_ebo_28_1_261219.ScanId;v=1;d1=29622.29622.3	controllerType=0 controllerNumber=1 scan=29622	59.4294
40334:3	1	S.MPLPPHPGHPGYINF.S			558.617	3	1673.84	1673.83	0	5.9	17	Non	156.26	156.26	156.26	2.17	1278	>sp|P02817|AMELX_BOVIN Amelogenin, X isoform OS=Bos taurus OX=9913 GN=AMELX PE=1 SV=2	1	hf1_10472_ebo_28_1_261219.ScanId;v=1;d1=29170.29170.3	controllerType=0 controllerNumber=1 scan=29170	58.6276
39341:3	1	S.MPLPPHPGHPGYINF.S			558.616	3	1673.83	1673.83	0	4.5	17	Non	158.92	158.92	158.92	2.3	1278	>sp|P02817|AMELX_BOVIN Amelogenin, X isoform OS=Bos taurus OX=9913 GN=AMELX PE=1 SV=2	1	hf1_10472_ebo_28_1_261219.ScanId;v=1;d1=28523.28523.3	controllerType=0 controllerNumber=1 scan=28523	57.4786
08326:3	1	S.MPLPPHPGHPGYINF.S			558.616	3	1673.83	1673.83	0	4.1	17	Non	169.89	169.89	169.89	2.21	1278	>sp|P02817|AMELX_BOVIN Amelogenin, X isoform OS=Bos taurus OX=9913 GN=AMELX PE=1 SV=2	1	hf1_10472_ebo_28_1_261219.ScanId;v=1;d1=7486.7486.2	controllerType=0 controllerNumber=1 scan=7486	20.8571
03833:3	1	S.MPLPPHPGHPGYINF.S			558.616	3	1673.83	1673.83	0	5.2	17	Non	172.12	172.12	172.12	2.65	1278	>sp|P02817|AMELX_BOVIN Amelogenin, X isoform OS=Bos taurus OX=9913 GN=AMELX PE=1 SV=2	1	hf1_10472_ebo_28_1_261219.ScanId;v=1;d1=4378.4378.3	controllerType=0 controllerNumber=1 scan=4378	15.384
44378:3	1	S.MPLPPHPGHPGYINF.S			558.616	3	1673.84	1673.83	0	5.6	17	Non	178.11	178.11	178.11	2.65	1278	>sp|P02817|AMELX_BOVIN Amelogenin, X isoform OS=Bos taurus OX=9913 GN=AMELX PE=1 SV=2	1	hf1_10472_ebo_28_1_261219.ScanId;v=1;d1=31821.31821.3	controllerType=0 controllerNumber=1 scan=31821	63.3489
40678:3	1	S.MPLPPHPGHPGYINF.S			558.616	3	1673.83	1673.83	0	4.4	17	Non	178.72	178.72	178.72	2.21	1278	>sp|P02817|AMELX_BOVIN Amelogenin, X isoform OS=Bos taurus OX=9913 GN=AMELX PE=1 SV=2	1	hf1_10472_ebo_28_1_261219.ScanId;v=1;d1=29398.29398.3	controllerType=0 controllerNumber=1 scan=29398	59.0325
00257:3	1	S.MPLPPHPGHPGYINF.S			558.617	3	1673.84	1673.83	0	5.9	17	Non	189.26	189.26	189.26	2.93	1278	>sp|P02817|AMELX_BOVIN Amelogenin, X isoform OS=Bos taurus OX=9913 GN=AMELX PE=1 SV=2	1	hf1_10472_ebo_28_1_261219.ScanId;v=1;d1=918.918.3	controllerType=0 controllerNumber=1 scan=918	4.8528
42597:3	1	S.MPLPPHPGHPGYINF.S			558.618	3	1673.84	1673.83	0	8.9	17	Non	198.83	198.83	198.83	2.4	1278	>sp|P02817|AMELX_BOVIN Amelogenin, X isoform OS=Bos taurus OX=9913 GN=AMELX PE=1 SV=2	1	hf1_10472_ebo_28_1_261219.ScanId;v=1;d1=30661.30661.3	controllerType=0 controllerNumber=1 scan=30661	61.276
02289:3	1	S.MPLPPHPGHPGYINF.S			558.615	3	1673.83	1673.83	0	3.3	17	Non	209.27	209.27	209.27	2.61	1278	>sp|P02817|AMELX_BOVIN Amelogenin, X isoform OS=Bos taurus OX=9913 GN=AMELX PE=1 SV=2	1	hf1_10472_ebo_28_1_261219.ScanId;v=1;d1=3313.3313.3	controllerType=0 controllerNumber=1 scan=3313	13.5235
10932:3	1	S.MPLPPHPGHPGYINF.S			558.616	3	1673.83	1673.83	0	4.9	17	Non	216.61	216.61	216.61	2.79	1278	>sp|P02817|AMELX_BOVIN Amelogenin, X isoform OS=Bos taurus OX=9913 GN=AMELX PE=1 SV=2	1	hf1_10472_ebo_28_1_261219.ScanId;v=1;d1=9243.9243.4	controllerType=0 controllerNumber=1 scan=9243	23.9178
41677:3	1	S.MPLPPHPGHPGYINF.S			558.615	3	1673.83	1673.83	0	3	17	Non	217.71	217.71	217.71	2.61	1278	>sp|P02817|AMELX_BOVIN Amelogenin, X isoform OS=Bos taurus OX=9913 GN=AMELX PE=1 SV=2	1	hf1_10472_ebo_28_1_261219.ScanId;v=1;d1=30050.30050.3	controllerType=0 controllerNumber=1 scan=30050	60.1897
39691:3	1	S.MPLPPHPGHPGYINF.S			558.618	3	1673.84	1673.83	0	8.1	17	Non	223.02	223.02	223.02	3.32	1278	>sp|P02817|AMELX_BOVIN Amelogenin, X isoform OS=Bos taurus OX=9913 GN=AMELX PE=1 SV=2	1	hf1_10472_ebo_28_1_261219.ScanId;v=1;d1=28752.28752.3	controllerType=0 controllerNumber=1 scan=28752	57.8846
48511:3	1	S.MPLPPHPGHPGYINF.S			558.614	3	1673.83	1673.83	0	1.6	17	Non	235.28	235.28	235.28	2.45	1278	>sp|P02817|AMELX_BOVIN Amelogenin, X isoform OS=Bos taurus OX=9913 GN=AMELX PE=1 SV=2	1	hf1_10472_ebo_28_1_261219.ScanId;v=1;d1=35267.35267.3	controllerType=0 controllerNumber=1 scan=35267	71.6577
30095:3	1	S.MPLPPHPGHPGYINF.S			558.617	3	1673.84	1673.83	0	6.7	17	Non	241.28	8.55	8.55	2.51	1278	>sp|P02817|AMELX_BOVIN Amelogenin, X isoform OS=Bos taurus OX=9913 GN=AMELX PE=1 SV=2	1	hf1_10472_ebo_28_1_261219.ScanId;v=1;d1=22267.22267.3	controllerType=0 controllerNumber=1 scan=22267	46.4736
48271:3	1	S.MPLPPHPGHPGYINF.S			558.614	3	1673.83	1673.83	0	1.5	17	Non	241.84	241.84	241.84	3.75	1278	>sp|P02817|AMELX_BOVIN Amelogenin, X isoform OS=Bos taurus OX=9913 GN=AMELX PE=1 SV=2	1	hf1_10472_ebo_28_1_261219.ScanId;v=1;d1=35032.35032.3	controllerType=0 controllerNumber=1 scan=35032	70.9754
48009:3	1	S.MPLPPHPGHPGYINF.S			558.616	3	1673.83	1673.83	0	5.2	17	Non	247.8	247.8	247.8	4.39	1278	>sp|P02817|AMELX_BOVIN Amelogenin, X isoform OS=Bos taurus OX=9913 GN=AMELX PE=1 SV=2	1	hf1_10472_ebo_28_1_261219.ScanId;v=1;d1=34774.34774.3	controllerType=0 controllerNumber=1 scan=34774	70.1692
00562:3	1	S.MPLPPHPGHPGYINF.S			558.615	3	1673.83	1673.83	0	2.5	17	Non	250.43	250.43	250.43	4.15	1278	>sp|P02817|AMELX_BOVIN Amelogenin, X isoform OS=Bos taurus OX=9913 GN=AMELX PE=1 SV=2	1	hf1_10472_ebo_28_1_261219.ScanId;v=1;d1=1960.1960.3	controllerType=0 controllerNumber=1 scan=1960	10.2921
00009:3	1	S.MPLPPHPGHPGYINF.S			558.617	3	1673.84	1673.83	0	7.1	17	Non	275.26	275.26	275.26	4.88	1278	>sp|P02817|AMELX_BOVIN Amelogenin, X isoform OS=Bos taurus OX=9913 GN=AMELX PE=1 SV=2	1	hf1_10472_ebo_28_1_261219.ScanId;v=1;d1=98.98.3	controllerType=0 controllerNumber=1 scan=98	0.5184
41361:3	1	S.MPLPPHPGHPGYINF.S			558.616	3	1673.83	1673.83	0	4.4	17	Non	276.59	276.59	276.59	4.15	1278	>sp|P02817|AMELX_BOVIN Amelogenin, X isoform OS=Bos taurus OX=9913 GN=AMELX PE=1 SV=2	1	hf1_10472_ebo_28_1_261219.ScanId;v=1;d1=29847.29847.3	controllerType=0 controllerNumber=1 scan=29847	59.8306
00655:3	1	S.MPLPPHPGHPGYINF.S			558.615	3	1673.83	1673.83	0	3.4	17	Non	281.18	273.13	273.13	4.15	1278	>sp|P02817|AMELX_BOVIN Amelogenin, X isoform OS=Bos taurus OX=9913 GN=AMELX PE=1 SV=2	1	hf1_10472_ebo_28_1_261219.ScanId;v=1;d1=2060.2060.3	controllerType=0 controllerNumber=1 scan=2060	10.6309
01837:3	1	S.MPLPPHPGHPGYINF.S			558.617	3	1673.84	1673.83	0	5.9	17	Non	290.82	290.82	290.82	4.48	1278	>sp|P02817|AMELX_BOVIN Amelogenin, X isoform OS=Bos taurus OX=9913 GN=AMELX PE=1 SV=2	1	hf1_10472_ebo_28_1_261219.ScanId;v=1;d1=3008.3008.3	controllerType=0 controllerNumber=1 scan=3008	12.9978
11900:3	1	S.MPLPPHPGHPGYINF.S			558.616	3	1673.83	1673.83	0	5.4	17	Non	297.16	297.16	297.16	4.48	1278	>sp|P02817|AMELX_BOVIN Amelogenin, X isoform OS=Bos taurus OX=9913 GN=AMELX PE=1 SV=2	1	hf1_10472_ebo_28_1_261219.ScanId;v=1;d1=9907.9907.3	controllerType=0 controllerNumber=1 scan=9907	25.0832
09632:3	1	S.MPLPPHPGHPGYINF.S			558.614	3	1673.83	1673.83	0	1.5	17	Non	307.99	307.99	307.99	3.61	1278	>sp|P02817|AMELX_BOVIN Amelogenin, X isoform OS=Bos taurus OX=9913 GN=AMELX PE=1 SV=2	1	hf1_10472_ebo_28_1_261219.ScanId;v=1;d1=8367.8367.3	controllerType=0 controllerNumber=1 scan=8367	22.3888
24332:2	1	S.MPLPPHPGHPGYINF.S			837.422	2	1673.84	1673.83	0	6.4	17	Non	312.42	312.42	312.42	4.43	1278	>sp|P02817|AMELX_BOVIN Amelogenin, X isoform OS=Bos taurus OX=9913 GN=AMELX PE=1 SV=2	1	hf1_10472_ebo_28_1_261219.ScanId;v=1;d1=18383.18383.2	controllerType=0 controllerNumber=1 scan=18383	39.7586
46892:3	1	S.MPLPPHPGHPGYINF.S			558.614	3	1673.83	1673.83	0	1.5	17	Non	314.23	314.23	314.23	4.02	1278	>sp|P02817|AMELX_BOVIN Amelogenin, X isoform OS=Bos taurus OX=9913 GN=AMELX PE=1 SV=2	1	hf1_10472_ebo_28_1_261219.ScanId;v=1;d1=33808.33808.3	controllerType=0 controllerNumber=1 scan=33808	67.6082
47035:3	1	S.MPLPPHPGHPGYINF.S			558.616	3	1673.83	1673.83	0	5.4	17	Non	317.22	317.22	317.22	4.71	1278	>sp|P02817|AMELX_BOVIN Amelogenin, X isoform OS=Bos taurus OX=9913 GN=AMELX PE=1 SV=2	1	hf1_10472_ebo_28_1_261219.ScanId;v=1;d1=33928.33928.3	controllerType=0 controllerNumber=1 scan=33928	67.9459
43378:3	1	S.MPLPPHPGHPGYINF.S			558.616	3	1673.83	1673.83	0	4.7	17	Non	324.9	324.9	324.9	4.95	1278	>sp|P02817|AMELX_BOVIN Amelogenin, X isoform OS=Bos taurus OX=9913 GN=AMELX PE=1 SV=2	1	hf1_10472_ebo_28_1_261219.ScanId;v=1;d1=31162.31162.3	controllerType=0 controllerNumber=1 scan=31162	62.1711
12791:3	1	S.MPLPPHPGHPGYINF.S			558.616	3	1673.83	1673.83	0	4.6	17	Non	333.77	323.36	323.36	4.95	1278	>sp|P02817|AMELX_BOVIN Amelogenin, X isoform OS=Bos taurus OX=9913 GN=AMELX PE=1 SV=2	1	hf1_10472_ebo_28_1_261219.ScanId;v=1;d1=10537.10537.3	controllerType=0 controllerNumber=1 scan=10537	26.1954
11194:3	1	S.MPLPPHPGHPGYINF.S			558.617	3	1673.84	1673.83	0	6.5	17	Non	341	330.57	330.57	5.21	1278	>sp|P02817|AMELX_BOVIN Amelogenin, X isoform OS=Bos taurus OX=9913 GN=AMELX PE=1 SV=2	1	hf1_10472_ebo_28_1_261219.ScanId;v=1;d1=9424.9424.3	controllerType=0 controllerNumber=1 scan=9424	24.2358
01654:3	1	S.MPLPPHPGHPGYINF.S			558.614	3	1673.83	1673.83	0	1.8	17	Non	341.4	341.4	341.4	4.07	1278	>sp|P02817|AMELX_BOVIN Amelogenin, X isoform OS=Bos taurus OX=9913 GN=AMELX PE=1 SV=2	1	hf1_10472_ebo_28_1_261219.ScanId;v=1;d1=2880.2880.4	controllerType=0 controllerNumber=1 scan=2880	12.7743
00021:2	1	S.MPLPPHPGHPGYINF.S			837.422	2	1673.84	1673.83	0	7	17	Non	342.92	342.92	342.92	4.92	1278	>sp|P02817|AMELX_BOVIN Amelogenin, X isoform OS=Bos taurus OX=9913 GN=AMELX PE=1 SV=2	1	hf1_10472_ebo_28_1_261219.ScanId;v=1;d1=105.105.3	controllerType=0 controllerNumber=1 scan=105	0.5289
21316:3	1	S.MPLPPHPGHPGYINF.S			558.617	3	1673.84	1673.83	0	7.1	17	Non	343.46	343.46	343.46	4.97	1278	>sp|P02817|AMELX_BOVIN Amelogenin, X isoform OS=Bos taurus OX=9913 GN=AMELX PE=1 SV=2	1	hf1_10472_ebo_28_1_261219.ScanId;v=1;d1=16340.16340.3	controllerType=0 controllerNumber=1 scan=16340	36.2555
47650:3	1	S.MPLPPHPGHPGYINF.S			558.616	3	1673.83	1673.83	0	5.1	17	Non	357.73	339.64	339.64	4.95	1278	>sp|P02817|AMELX_BOVIN Amelogenin, X isoform OS=Bos taurus OX=9913 GN=AMELX PE=1 SV=2	1	hf1_10472_ebo_28_1_261219.ScanId;v=1;d1=34451.34451.3	controllerType=0 controllerNumber=1 scan=34451	69.3183
47467:3	1	S.MPLPPHPGHPGYINF.S			558.616	3	1673.83	1673.83	0	5.2	17	Non	359.19	359.19	359.19	4.95	1278	>sp|P02817|AMELX_BOVIN Amelogenin, X isoform OS=Bos taurus OX=9913 GN=AMELX PE=1 SV=2	1	hf1_10472_ebo_28_1_261219.ScanId;v=1;d1=34299.34299.3	controllerType=0 controllerNumber=1 scan=34299	68.9786
28195:3	1	S.MPLPPHPGHPGYINF.S			558.617	3	1673.84	1673.83	0	7.1	17	Non	359.44	359.44	359.44	4.97	1278	>sp|P02817|AMELX_BOVIN Amelogenin, X isoform OS=Bos taurus OX=9913 GN=AMELX PE=1 SV=2	1	hf1_10472_ebo_28_1_261219.ScanId;v=1;d1=20983.20983.3	controllerType=0 controllerNumber=1 scan=20983	44.2492
00784:3	1	S.MPLPPHPGHPGYINF.S			558.615	3	1673.83	1673.83	0	2.9	17	Non	365.82	365.82	365.82	5.64	1278	>sp|P02817|AMELX_BOVIN Amelogenin, X isoform OS=Bos taurus OX=9913 GN=AMELX PE=1 SV=2	1	hf1_10472_ebo_28_1_261219.ScanId;v=1;d1=2175.2175.3	controllerType=0 controllerNumber=1 scan=2175	10.969
08602:3	1	S.MPLPPHPGHPGYINF.S			558.616	3	1673.83	1673.83	0	4	17	Non	369.21	369.21	369.21	5.64	1278	>sp|P02817|AMELX_BOVIN Amelogenin, X isoform OS=Bos taurus OX=9913 GN=AMELX PE=1 SV=2	1	hf1_10472_ebo_28_1_261219.ScanId;v=1;d1=7675.7675.3	controllerType=0 controllerNumber=1 scan=7675	21.1847
08947:3	1	S.MPLPPHPGHPGYINF.S			558.615	3	1673.83	1673.83	0	3.8	17	Non	370.1	370.1	370.1	5.82	1278	>sp|P02817|AMELX_BOVIN Amelogenin, X isoform OS=Bos taurus OX=9913 GN=AMELX PE=1 SV=2	1	hf1_10472_ebo_28_1_261219.ScanId;v=1;d1=7911.7911.3	controllerType=0 controllerNumber=1 scan=7911	21.5965
27594:3	1	S.MPLPPHPGHPGYINF.S			558.616	3	1673.83	1673.83	0	5	17	Non	378.75	378.75	378.75	5.89	1278	>sp|P02817|AMELX_BOVIN Amelogenin, X isoform OS=Bos taurus OX=9913 GN=AMELX PE=1 SV=2	1	hf1_10472_ebo_28_1_261219.ScanId;v=1;d1=20578.20578.3	controllerType=0 controllerNumber=1 scan=20578	43.5476
23091:3	1	S.MPLPPHPGHPGYINF.S			558.619	3	1673.84	1673.83	0	9.6	17	Non	382.43	352.17	352.17	4.77	1278	>sp|P02817|AMELX_BOVIN Amelogenin, X isoform OS=Bos taurus OX=9913 GN=AMELX PE=1 SV=2	1	hf1_10472_ebo_28_1_261219.ScanId;v=1;d1=17546.17546.3	controllerType=0 controllerNumber=1 scan=17546	38.3408
26615:3	1	S.MPLPPHPGHPGYINF.S			558.616	3	1673.83	1673.83	0	4.8	17	Non	386.29	364.91	364.91	5.89	1278	>sp|P02817|AMELX_BOVIN Amelogenin, X isoform OS=Bos taurus OX=9913 GN=AMELX PE=1 SV=2	1	hf1_10472_ebo_28_1_261219.ScanId;v=1;d1=19914.19914.4	controllerType=0 controllerNumber=1 scan=19914	42.401
24922:3	1	S.MPLPPHPGHPGYINF.S			558.617	3	1673.84	1673.83	0	7.3	17	Non	387.61	331.43	331.43	5.29	1278	>sp|P02817|AMELX_BOVIN Amelogenin, X isoform OS=Bos taurus OX=9913 GN=AMELX PE=1 SV=2	1	hf1_10472_ebo_28_1_261219.ScanId;v=1;d1=18772.18772.3	controllerType=0 controllerNumber=1 scan=18772	40.4278
12482:3	1	S.MPLPPHPGHPGYINF.S			558.615	3	1673.83	1673.83	0	2.4	17	Non	396.96	396.96	396.96	5.19	1278	>sp|P02817|AMELX_BOVIN Amelogenin, X isoform OS=Bos taurus OX=9913 GN=AMELX PE=1 SV=2	1	hf1_10472_ebo_28_1_261219.ScanId;v=1;d1=10327.10327.3	controllerType=0 controllerNumber=1 scan=10327	25.8257
00891:3	1	S.MPLPPHPGHPGYINF.S			558.615	3	1673.83	1673.83	0	3.3	17	Non	401.35	401.35	401.35	5.85	1278	>sp|P02817|AMELX_BOVIN Amelogenin, X isoform OS=Bos taurus OX=9913 GN=AMELX PE=1 SV=2	1	hf1_10472_ebo_28_1_261219.ScanId;v=1;d1=2279.2279.3	controllerType=0 controllerNumber=1 scan=2279	11.306
01290:3	1	S.MPLPPHPGHPGYINF.S			558.615	3	1673.83	1673.83	0	2.7	17	Non	406.3	406.3	406.3	5.85	1278	>sp|P02817|AMELX_BOVIN Amelogenin, X isoform OS=Bos taurus OX=9913 GN=AMELX PE=1 SV=2	1	hf1_10472_ebo_28_1_261219.ScanId;v=1;d1=2629.2629.3	controllerType=0 controllerNumber=1 scan=2629	12.3293
11489:3	1	S.MPLPPHPGHPGYINF.S			558.617	3	1673.84	1673.83	0	6.4	17	Non	415.03	392.88	392.88	6.36	1278	>sp|P02817|AMELX_BOVIN Amelogenin, X isoform OS=Bos taurus OX=9913 GN=AMELX PE=1 SV=2	1	hf1_10472_ebo_28_1_261219.ScanId;v=1;d1=9628.9628.3	controllerType=0 controllerNumber=1 scan=9628	24.5958
26000:3	1	S.MPLPPHPGHPGYINF.S			558.616	3	1673.83	1673.83	0	4.1	17	Non	420.58	391.54	391.54	5.67	1278	>sp|P02817|AMELX_BOVIN Amelogenin, X isoform OS=Bos taurus OX=9913 GN=AMELX PE=1 SV=2	1	hf1_10472_ebo_28_1_261219.ScanId;v=1;d1=19487.19487.3	controllerType=0 controllerNumber=1 scan=19487	41.6647
24318:3	1	S.MPLPPHPGHPGYINF.S			558.618	3	1673.84	1673.83	0	8.7	17	Non	424.59	399.83	399.83	5.65	1278	>sp|P02817|AMELX_BOVIN Amelogenin, X isoform OS=Bos taurus OX=9913 GN=AMELX PE=1 SV=2	1	hf1_10472_ebo_28_1_261219.ScanId;v=1;d1=18376.18376.3	controllerType=0 controllerNumber=1 scan=18376	39.7483
23383:3	1	S.MPLPPHPGHPGYINF.S			558.618	3	1673.84	1673.83	0	8.4	17	Non	441.14	383.35	383.35	5.63	1278	>sp|P02817|AMELX_BOVIN Amelogenin, X isoform OS=Bos taurus OX=9913 GN=AMELX PE=1 SV=2	1	hf1_10472_ebo_28_1_261219.ScanId;v=1;d1=17749.17749.3	controllerType=0 controllerNumber=1 scan=17749	38.6833
01119:3	1	S.MPLPPHPGHPGYINF.S			558.616	3	1673.83	1673.83	0	4.8	17	Non	442.24	442.24	442.24	6.08	1278	>sp|P02817|AMELX_BOVIN Amelogenin, X isoform OS=Bos taurus OX=9913 GN=AMELX PE=1 SV=2	1	hf1_10472_ebo_28_1_261219.ScanId;v=1;d1=2490.2490.3	controllerType=0 controllerNumber=1 scan=2490	11.9867
24013:3	1	S.MPLPPHPGHPGYINF.S			558.618	3	1673.84	1673.83	0	8.5	17	Non	454.81	423.84	423.84	5.69	1278	>sp|P02817|AMELX_BOVIN Amelogenin, X isoform OS=Bos taurus OX=9913 GN=AMELX PE=1 SV=2	1	hf1_10472_ebo_28_1_261219.ScanId;v=1;d1=18167.18167.3	controllerType=0 controllerNumber=1 scan=18167	39.3952
01018:3	1	S.MPLPPHPGHPGYINF.S			558.617	3	1673.84	1673.83	0	6.2	17	Non	458.47	450.01	450.01	6.14	1278	>sp|P02817|AMELX_BOVIN Amelogenin, X isoform OS=Bos taurus OX=9913 GN=AMELX PE=1 SV=2	1	hf1_10472_ebo_28_1_261219.ScanId;v=1;d1=2391.2391.3	controllerType=0 controllerNumber=1 scan=2391	11.647
24625:3	1	S.MPLPPHPGHPGYINF.S			558.619	3	1673.84	1673.83	0	9.1	17	Non	459.32	406.53	406.53	5.63	1278	>sp|P02817|AMELX_BOVIN Amelogenin, X isoform OS=Bos taurus OX=9913 GN=AMELX PE=1 SV=2	1	hf1_10472_ebo_28_1_261219.ScanId;v=1;d1=18574.18574.3	controllerType=0 controllerNumber=1 scan=18574	40.0867
23702:3	1	S.MPLPPHPGHPGYINF.S			558.618	3	1673.84	1673.83	0	8.4	17	Non	487.27	478.06	478.06	5.77	1278	>sp|P02817|AMELX_BOVIN Amelogenin, X isoform OS=Bos taurus OX=9913 GN=AMELX PE=1 SV=2	1	hf1_10472_ebo_28_1_261219.ScanId;v=1;d1=17958.17958.3	controllerType=0 controllerNumber=1 scan=17958	39.0391
22807:2	1	S.MPLPPHPGHPGYINF.S			837.423	2	1673.84	1673.83	0	8	17	Non	493.43	400.24	400.24	6.37	1278	>sp|P02817|AMELX_BOVIN Amelogenin, X isoform OS=Bos taurus OX=9913 GN=AMELX PE=1 SV=2	1	hf1_10472_ebo_28_1_261219.ScanId;v=1;d1=17359.17359.2	controllerType=0 controllerNumber=1 scan=17359	38.0189
24656:2	1	S.MPLPPHPGHPGYINF.S			837.422	2	1673.84	1673.83	0	6.6	17	Non	515.86	438.87	438.87	6.42	1278	>sp|P02817|AMELX_BOVIN Amelogenin, X isoform OS=Bos taurus OX=9913 GN=AMELX PE=1 SV=2	1	hf1_10472_ebo_28_1_261219.ScanId;v=1;d1=18597.18597.2	controllerType=0 controllerNumber=1 scan=18597	40.1258
23107:2	1	S.MPLPPHPGHPGYINF.S			837.42	2	1673.83	1673.83	0	4.8	17	Non	588.6	514.09	514.09	7.01	1278	>sp|P02817|AMELX_BOVIN Amelogenin, X isoform OS=Bos taurus OX=9913 GN=AMELX PE=1 SV=2	1	hf1_10472_ebo_28_1_261219.ScanId;v=1;d1=17558.17558.2	controllerType=0 controllerNumber=1 scan=17558	38.3581
24027:2	1	S.MPLPPHPGHPGYINF.S			837.421	2	1673.84	1673.83	0	5.8	17	Non	677.93	575.19	575.19	9.07	1278	>sp|P02817|AMELX_BOVIN Amelogenin, X isoform OS=Bos taurus OX=9913 GN=AMELX PE=1 SV=2	1	hf1_10472_ebo_28_1_261219.ScanId;v=1;d1=18178.18178.2	controllerType=0 controllerNumber=1 scan=18178	39.4133
23733:2	1	S.MPLPPHPGHPGYINF.S			837.421	2	1673.84	1673.83	0	5.8	17	Non	683.48	589.8	589.8	9.07	1278	>sp|P02817|AMELX_BOVIN Amelogenin, X isoform OS=Bos taurus OX=9913 GN=AMELX PE=1 SV=2	1	hf1_10472_ebo_28_1_261219.ScanId;v=1;d1=17980.17980.2	controllerType=0 controllerNumber=1 scan=17980	39.0765
23425:2	1	S.MPLPPHPGHPGYINF.S			837.421	2	1673.83	1673.83	0	5.1	17	Non	695.24	589.18	589.18	9.69	1278	>sp|P02817|AMELX_BOVIN Amelogenin, X isoform OS=Bos taurus OX=9913 GN=AMELX PE=1 SV=2	1	hf1_10472_ebo_28_1_261219.ScanId;v=1;d1=17776.17776.2	controllerType=0 controllerNumber=1 scan=17776	38.7264
24338:2	1	S.MPLPPHPGHPGYINF.S			837.422	2	1673.84	1673.83	0	6.1	17	Non	705.24	611.85	611.85	10.69	1278	>sp|P02817|AMELX_BOVIN Amelogenin, X isoform OS=Bos taurus OX=9913 GN=AMELX PE=1 SV=2	1	hf1_10472_ebo_28_1_261219.ScanId;v=1;d1=18388.18388.2	controllerType=0 controllerNumber=1 scan=18388	39.7678
00834:3	1	S.MP[+15.995]LPPHPGHPGYINF.S		P[+16]	563.947	3	1689.83	1689.82	0	3.9	17	Non	5.5	5.5	4	0.28	1278	>sp|P02817|AMELX_BOVIN Amelogenin, X isoform OS=Bos taurus OX=9913 GN=AMELX PE=1 SV=2	1	hf1_10472_ebo_28_1_261219.ScanId;v=1;d1=2223.2223.2	controllerType=0 controllerNumber=1 scan=2223	11.1237
00095:3	1	S.MP[+15.995]LPPHPGHPGYINF.S		P[+16]	563.949	3	1689.83	1689.82	0	7.4	17	Non	12.63	12.63	4	0.79	1278	>sp|P02817|AMELX_BOVIN Amelogenin, X isoform OS=Bos taurus OX=9913 GN=AMELX PE=1 SV=2	1	hf1_10472_ebo_28_1_261219.ScanId;v=1;d1=312.312.3	controllerType=0 controllerNumber=1 scan=312	1.5743
48876:3	1	S.MP[+15.995]LPPHPGHPGYINF.S		P[+16]	563.946	3	1689.82	1689.82	0	2.4	17	Non	24.53	24.53	4	0.28	1278	>sp|P02817|AMELX_BOVIN Amelogenin, X isoform OS=Bos taurus OX=9913 GN=AMELX PE=1 SV=2	1	hf1_10472_ebo_28_1_261219.ScanId;v=1;d1=35626.35626.3	controllerType=0 controllerNumber=1 scan=35626	72.7691
49500:3	1	S.MP[+15.995]LPPHPGHPGYINF.S		P[+16]	563.949	3	1689.83	1689.82	0	6.3	17	Non	32.24	32.24	4	1.08	1278	>sp|P02817|AMELX_BOVIN Amelogenin, X isoform OS=Bos taurus OX=9913 GN=AMELX PE=1 SV=2	1	hf1_10472_ebo_28_1_261219.ScanId;v=1;d1=36518.36518.3	controllerType=0 controllerNumber=1 scan=36518	76.4091
00285:3	1	S.MP[+15.995]LPPHPGHPGYINF.S		P[+16]	563.948	3	1689.83	1689.82	0	4.5	17	Non	37.14	37.14	4	0.46	1278	>sp|P02817|AMELX_BOVIN Amelogenin, X isoform OS=Bos taurus OX=9913 GN=AMELX PE=1 SV=2	1	hf1_10472_ebo_28_1_261219.ScanId;v=1;d1=1114.1114.3	controllerType=0 controllerNumber=1 scan=1114	5.9902
00234:3	1	S.MP[+15.995]LPPHPGHPGYINF.S		P[+16]	563.949	3	1689.83	1689.82	0	7.3	17	Non	42.81	42.81	4	1.08	1278	>sp|P02817|AMELX_BOVIN Amelogenin, X isoform OS=Bos taurus OX=9913 GN=AMELX PE=1 SV=2	1	hf1_10472_ebo_28_1_261219.ScanId;v=1;d1=817.817.3	controllerType=0 controllerNumber=1 scan=817	4.2952
00268:3	1	S.MP[+15.995]LPPHPGHPGYINF.S		P[+16]	563.947	3	1689.83	1689.82	0	3.3	17	Non	45.8	45.8	4	0.28	1278	>sp|P02817|AMELX_BOVIN Amelogenin, X isoform OS=Bos taurus OX=9913 GN=AMELX PE=1 SV=2	1	hf1_10472_ebo_28_1_261219.ScanId;v=1;d1=997.997.3	controllerType=0 controllerNumber=1 scan=997	5.3122
00223:3	1	S.MP[+15.995]LPPHPGHPGYINF.S		P[+16]	563.948	3	1689.83	1689.82	0	5.8	17	Non	55.67	55.67	4	0.48	1278	>sp|P02817|AMELX_BOVIN Amelogenin, X isoform OS=Bos taurus OX=9913 GN=AMELX PE=1 SV=2	1	hf1_10472_ebo_28_1_261219.ScanId;v=1;d1=757.757.3	controllerType=0 controllerNumber=1 scan=757	3.9543
00122:3	1	S.MP[+15.995]LPPHPGHPGYINF.S		P[+16]	563.947	3	1689.83	1689.82	0	4.1	17	Non	60.48	60.48	4	0.28	1278	>sp|P02817|AMELX_BOVIN Amelogenin, X isoform OS=Bos taurus OX=9913 GN=AMELX PE=1 SV=2	1	hf1_10472_ebo_28_1_261219.ScanId;v=1;d1=544.544.3	controllerType=0 controllerNumber=1 scan=544	2.9361
00623:2	1	S.MP[+15.995]LPPHPGHPGYINF.S		P[+16]	845.418	2	1689.83	1689.82	0	5.2	17	Non	60.83	60.83	4	2.23	1278	>sp|P02817|AMELX_BOVIN Amelogenin, X isoform OS=Bos taurus OX=9913 GN=AMELX PE=1 SV=2	1	hf1_10472_ebo_28_1_261219.ScanId;v=1;d1=2023.2023.2	controllerType=0 controllerNumber=1 scan=2023	10.4995
39992:3	1	S.MPLPPHPGHPGYIN[+0.984]F.S		N[+1]	558.946	3	1674.82	1674.81	0	7.5	17	Non	75.87	75.87	75.87	1.09	1278	>sp|P02817|AMELX_BOVIN Amelogenin, X isoform OS=Bos taurus OX=9913 GN=AMELX PE=1 SV=2	1	hf1_10472_ebo_28_1_261219.ScanId;v=1;d1=28945.28945.3	controllerType=0 controllerNumber=1 scan=28945	58.2294
03122:3	1	S.MP[+15.995]LPPHPGHPGYINF.S		P[+16]	563.946	3	1689.82	1689.82	0	2.4	17	Non	81.93	81.93	4	0.96	1278	>sp|P02817|AMELX_BOVIN Amelogenin, X isoform OS=Bos taurus OX=9913 GN=AMELX PE=1 SV=2	1	hf1_10472_ebo_28_1_261219.ScanId;v=1;d1=3883.3883.3	controllerType=0 controllerNumber=1 scan=3883	14.5129
00966:2	1	S.MP[+15.995]LPPHPGHPGYINF.S		P[+16]	845.418	2	1689.83	1689.82	0	4.5	17	Non	83.04	83.04	4	2.21	1278	>sp|P02817|AMELX_BOVIN Amelogenin, X isoform OS=Bos taurus OX=9913 GN=AMELX PE=1 SV=2	1	hf1_10472_ebo_28_1_261219.ScanId;v=1;d1=2357.2357.2	controllerType=0 controllerNumber=1 scan=2357	11.5701
37889:3	1	S.MP[+15.995]LPPHPGHPGYINF.S		P[+16]	563.95	3	1689.83	1689.82	0	8.3	17	Non	86.88	86.88	5.8	0.96	1278	>sp|P02817|AMELX_BOVIN Amelogenin, X isoform OS=Bos taurus OX=9913 GN=AMELX PE=1 SV=2	1	hf1_10472_ebo_28_1_261219.ScanId;v=1;d1=27567.27567.3	controllerType=0 controllerNumber=1 scan=27567	55.7787
27963:2	1	S.MPLPPHPGH[+15.995]PGYINF.S		H[+16]	845.418	2	1689.83	1689.82	0	4.4	17	Non	91.79	91.79	0	0.91	1278	>sp|P02817|AMELX_BOVIN Amelogenin, X isoform OS=Bos taurus OX=9913 GN=AMELX PE=1 SV=2	1	hf1_10472_ebo_28_1_261219.ScanId;v=1;d1=20826.20826.3	controllerType=0 controllerNumber=1 scan=20826	43.9788
41314:3	1	S.MP[+15.995]LPPHPGHPGYINF.S		P[+16]	563.949	3	1689.83	1689.82	0	7.8	17	Non	95.58	95.58	4	2.16	1278	>sp|P02817|AMELX_BOVIN Amelogenin, X isoform OS=Bos taurus OX=9913 GN=AMELX PE=1 SV=2	1	hf1_10472_ebo_28_1_261219.ScanId;v=1;d1=29817.29817.3	controllerType=0 controllerNumber=1 scan=29817	59.7764
47564:2	1	S.M[+15.995]PLPPHPGHPGYINF.S		M[+16]	845.414	2	1689.82	1689.82	0	-0.3	17	Non	104.87	104.87	25.57	1.11	1278	>sp|P02817|AMELX_BOVIN Amelogenin, X isoform OS=Bos taurus OX=9913 GN=AMELX PE=1 SV=2	1	hf1_10472_ebo_28_1_261219.ScanId;v=1;d1=34375.34375.2	controllerType=0 controllerNumber=1 scan=34375	69.1409
42336:3	1	S.MP[+15.995]LPPHPGHPGYINF.S		P[+16]	563.947	3	1689.83	1689.82	0	2.6	17	Non	109.14	109.14	5.8	1.06	1278	>sp|P02817|AMELX_BOVIN Amelogenin, X isoform OS=Bos taurus OX=9913 GN=AMELX PE=1 SV=2	1	hf1_10472_ebo_28_1_261219.ScanId;v=1;d1=30491.30491.3	controllerType=0 controllerNumber=1 scan=30491	60.9726
00101:3	1	S.MP[+15.995]LPPHPGHPGYINF.S		P[+16]	563.947	3	1689.83	1689.82	0	4.3	17	Non	109.14	109.14	4	1.06	1278	>sp|P02817|AMELX_BOVIN Amelogenin, X isoform OS=Bos taurus OX=9913 GN=AMELX PE=1 SV=2	1	hf1_10472_ebo_28_1_261219.ScanId;v=1;d1=370.370.3	controllerType=0 controllerNumber=1 scan=370	1.9171
00291:3	1	S.MP[+15.995]LPPHPGHPGYINF.S		P[+16]	563.947	3	1689.83	1689.82	0	2.8	17	Non	111.53	111.53	4	1.06	1278	>sp|P02817|AMELX_BOVIN Amelogenin, X isoform OS=Bos taurus OX=9913 GN=AMELX PE=1 SV=2	1	hf1_10472_ebo_28_1_261219.ScanId;v=1;d1=1172.1172.3	controllerType=0 controllerNumber=1 scan=1172	6.3328
00278:3	1	S.MP[+15.995]LPPHPGHPGYINF.S		P[+16]	563.948	3	1689.83	1689.82	0	4.8	17	Non	128.92	128.92	4	2.3	1278	>sp|P02817|AMELX_BOVIN Amelogenin, X isoform OS=Bos taurus OX=9913 GN=AMELX PE=1 SV=2	1	hf1_10472_ebo_28_1_261219.ScanId;v=1;d1=1056.1056.3	controllerType=0 controllerNumber=1 scan=1056	5.6503
13413:3	1	S.MP[+15.995]LPPHPGHPGYINF.S		P[+16]	563.948	3	1689.83	1689.82	0	4.7	17	Non	136.64	136.64	5.8	2.17	1278	>sp|P02817|AMELX_BOVIN Amelogenin, X isoform OS=Bos taurus OX=9913 GN=AMELX PE=1 SV=2	1	hf1_10472_ebo_28_1_261219.ScanId;v=1;d1=10960.10960.3	controllerType=0 controllerNumber=1 scan=10960	26.9347
08246:3	1	S.M[+15.995]PLPPHPGHPGYINF.S		M[+16]	563.949	3	1689.83	1689.82	0	7.4	17	Non	138.72	138.72	1.28	2.4	1278	>sp|P02817|AMELX_BOVIN Amelogenin, X isoform OS=Bos taurus OX=9913 GN=AMELX PE=1 SV=2	1	hf1_10472_ebo_28_1_261219.ScanId;v=1;d1=7434.7434.3	controllerType=0 controllerNumber=1 scan=7434	20.7665
09428:3	1	S.MP[+15.995]LPPHPGHPGYINF.S		P[+16]	563.946	3	1689.82	1689.82	0	1.4	17	Non	141.91	141.91	4	1.01	1278	>sp|P02817|AMELX_BOVIN Amelogenin, X isoform OS=Bos taurus OX=9913 GN=AMELX PE=1 SV=2	1	hf1_10472_ebo_28_1_261219.ScanId;v=1;d1=8232.8232.3	controllerType=0 controllerNumber=1 scan=8232	22.1562
46792:3	1	S.MP[+15.995]LPPHPGHPGYINF.S		P[+16]	563.947	3	1689.83	1689.82	0	4.4	17	Non	141.95	141.95	4	2.3	1278	>sp|P02817|AMELX_BOVIN Amelogenin, X isoform OS=Bos taurus OX=9913 GN=AMELX PE=1 SV=2	1	hf1_10472_ebo_28_1_261219.ScanId;v=1;d1=33706.33706.3	controllerType=0 controllerNumber=1 scan=33706	67.2882
11801:2	1	S.M[+15.995]PLPPHPGHPGYINF.S		M[+16]	845.415	2	1689.82	1689.82	0	1.5	17	Non	142.65	142.65	26.86	1	1278	>sp|P02817|AMELX_BOVIN Amelogenin, X isoform OS=Bos taurus OX=9913 GN=AMELX PE=1 SV=2	1	hf1_10472_ebo_28_1_261219.ScanId;v=1;d1=9842.9842.2	controllerType=0 controllerNumber=1 scan=9842	24.9691
00299:3	1	S.MP[+15.995]LPPHPGHPGYINF.S		P[+16]	563.948	3	1689.83	1689.82	0	4.7	17	Non	144.37	144.37	4	2.3	1278	>sp|P02817|AMELX_BOVIN Amelogenin, X isoform OS=Bos taurus OX=9913 GN=AMELX PE=1 SV=2	1	hf1_10472_ebo_28_1_261219.ScanId;v=1;d1=1231.1231.3	controllerType=0 controllerNumber=1 scan=1231	6.6729
42960:3	1	S.MP[+15.995]LPPHPGHPGYINF.S		P[+16]	563.95	3	1689.83	1689.82	0	8	17	Non	145.93	145.93	4	2.4	1278	>sp|P02817|AMELX_BOVIN Amelogenin, X isoform OS=Bos taurus OX=9913 GN=AMELX PE=1 SV=2	1	hf1_10472_ebo_28_1_261219.ScanId;v=1;d1=30896.30896.3	controllerType=0 controllerNumber=1 scan=30896	61.6975
48671:3	1	S.MP[+15.995]LPPHPGHPGYINF.S		P[+16]	563.948	3	1689.83	1689.82	0	4.9	17	Non	148.15	148.15	4	2.3	1278	>sp|P02817|AMELX_BOVIN Amelogenin, X isoform OS=Bos taurus OX=9913 GN=AMELX PE=1 SV=2	1	hf1_10472_ebo_28_1_261219.ScanId;v=1;d1=35414.35414.3	controllerType=0 controllerNumber=1 scan=35414	72.0931
33759:3	1	S.MP[+15.995]LPPHPGHPGYINF.S		P[+16]	563.945	3	1689.82	1689.82	0	0.4	17	Non	149	149	5.8	1.01	1278	>sp|P02817|AMELX_BOVIN Amelogenin, X isoform OS=Bos taurus OX=9913 GN=AMELX PE=1 SV=2	1	hf1_10472_ebo_28_1_261219.ScanId;v=1;d1=24779.24779.3	controllerType=0 controllerNumber=1 scan=24779	50.8539
02168:3	1	S.MP[+15.995]LPPHPGHPGYINF.S		P[+16]	563.946	3	1689.82	1689.82	0	1.3	17	Non	150.6	150.6	4	1.01	1278	>sp|P02817|AMELX_BOVIN Amelogenin, X isoform OS=Bos taurus OX=9913 GN=AMELX PE=1 SV=2	1	hf1_10472_ebo_28_1_261219.ScanId;v=1;d1=3228.3228.4	controllerType=0 controllerNumber=1 scan=3228	13.3784
00261:3	1	S.MP[+15.995]LPPHPGHPGYINF.S		P[+16]	563.948	3	1689.83	1689.82	0	5.7	17	Non	155.22	155.22	4	2.3	1278	>sp|P02817|AMELX_BOVIN Amelogenin, X isoform OS=Bos taurus OX=9913 GN=AMELX PE=1 SV=2	1	hf1_10472_ebo_28_1_261219.ScanId;v=1;d1=939.939.3	controllerType=0 controllerNumber=1 scan=939	4.974
00115:3	1	S.MP[+15.995]LPPHPGHPGYINF.S		P[+16]	563.949	3	1689.83	1689.82	0	7.4	17	Non	157.89	157.89	4	2.6	1278	>sp|P02817|AMELX_BOVIN Amelogenin, X isoform OS=Bos taurus OX=9913 GN=AMELX PE=1 SV=2	1	hf1_10472_ebo_28_1_261219.ScanId;v=1;d1=486.486.3	controllerType=0 controllerNumber=1 scan=486	2.5966
40709:3	1	S.MP[+15.995]LPPHPGHPGYINF.S		P[+16]	563.948	3	1689.83	1689.82	0	4.8	17	Non	158.98	158.98	4	2.3	1278	>sp|P02817|AMELX_BOVIN Amelogenin, X isoform OS=Bos taurus OX=9913 GN=AMELX PE=1 SV=2	1	hf1_10472_ebo_28_1_261219.ScanId;v=1;d1=29419.29419.3	controllerType=0 controllerNumber=1 scan=29419	59.07
20212:3	1	S.MPLPPHPGHPGYIN[+0.984]F.S		N[+1]	558.94	3	1674.81	1674.81	0	-2.5	17	Non	162.98	162.98	162.98	1.36	1278	>sp|P02817|AMELX_BOVIN Amelogenin, X isoform OS=Bos taurus OX=9913 GN=AMELX PE=1 SV=2	1	hf1_10472_ebo_28_1_261219.ScanId;v=1;d1=15577.15577.3	controllerType=0 controllerNumber=1 scan=15577	34.9471
10390:3	1	S.MP[+15.995]LPPHPGHPGYINF.S		P[+16]	563.948	3	1689.83	1689.82	0	4.7	17	Non	165.66	165.66	5.8	2.26	1278	>sp|P02817|AMELX_BOVIN Amelogenin, X isoform OS=Bos taurus OX=9913 GN=AMELX PE=1 SV=2	1	hf1_10472_ebo_28_1_261219.ScanId;v=1;d1=8876.8876.3	controllerType=0 controllerNumber=1 scan=8876	23.2744
00357:3	1	S.MP[+15.995]LPPHPGHPGYINF.S		P[+16]	563.947	3	1689.83	1689.82	0	3.7	17	Non	165.78	165.78	4	2.5	1278	>sp|P02817|AMELX_BOVIN Amelogenin, X isoform OS=Bos taurus OX=9913 GN=AMELX PE=1 SV=2	1	hf1_10472_ebo_28_1_261219.ScanId;v=1;d1=1597.1597.3	controllerType=0 controllerNumber=1 scan=1597	8.7178
44173:3	1	S.MP[+15.995]LPPHPGHPGYINF.S		P[+16]	563.946	3	1689.82	1689.82	0	1.5	17	Non	167.64	167.64	4	2.25	1278	>sp|P02817|AMELX_BOVIN Amelogenin, X isoform OS=Bos taurus OX=9913 GN=AMELX PE=1 SV=2	1	hf1_10472_ebo_28_1_261219.ScanId;v=1;d1=31686.31686.3	controllerType=0 controllerNumber=1 scan=31686	63.1098
49081:3	1	S.MP[+15.995]LPPHPGHPGYINF.S		P[+16]	563.949	3	1689.83	1689.82	0	6.7	17	Non	179.87	179.87	5.8	2.84	1278	>sp|P02817|AMELX_BOVIN Amelogenin, X isoform OS=Bos taurus OX=9913 GN=AMELX PE=1 SV=2	1	hf1_10472_ebo_28_1_261219.ScanId;v=1;d1=35842.35842.3	controllerType=0 controllerNumber=1 scan=35842	73.4535
44799:3	1	S.MP[+15.995]LPPHPGHPGYINF.S		P[+16]	563.948	3	1689.83	1689.82	0	5	17	Non	181.41	181.41	4	2.65	1278	>sp|P02817|AMELX_BOVIN Amelogenin, X isoform OS=Bos taurus OX=9913 GN=AMELX PE=1 SV=2	1	hf1_10472_ebo_28_1_261219.ScanId;v=1;d1=32089.32089.3	controllerType=0 controllerNumber=1 scan=32089	63.8258
39417:3	1	S.MP[+15.995]LPPHPGHPGYINF.S		P[+16]	563.948	3	1689.83	1689.82	0	6.2	17	Non	182.62	182.62	4	2.65	1278	>sp|P02817|AMELX_BOVIN Amelogenin, X isoform OS=Bos taurus OX=9913 GN=AMELX PE=1 SV=2	1	hf1_10472_ebo_28_1_261219.ScanId;v=1;d1=28574.28574.3	controllerType=0 controllerNumber=1 scan=28574	57.5699
14628:3	1	S.MP[+15.995]LPPHPGHPGYINF.S		P[+16]	563.947	3	1689.83	1689.82	0	3.1	17	Non	184.62	184.62	5.8	2.21	1278	>sp|P02817|AMELX_BOVIN Amelogenin, X isoform OS=Bos taurus OX=9913 GN=AMELX PE=1 SV=2	1	hf1_10472_ebo_28_1_261219.ScanId;v=1;d1=11769.11769.3	controllerType=0 controllerNumber=1 scan=11769	28.3499
41615:3	1	S.MP[+15.995]LPPHPGHPGYINF.S		P[+16]	563.947	3	1689.83	1689.82	0	2.7	17	Non	191.63	191.63	4	2.73	1278	>sp|P02817|AMELX_BOVIN Amelogenin, X isoform OS=Bos taurus OX=9913 GN=AMELX PE=1 SV=2	1	hf1_10472_ebo_28_1_261219.ScanId;v=1;d1=30012.30012.3	controllerType=0 controllerNumber=1 scan=30012	60.1238
24323:2	1	S.M[+15.995]PLPPHPGHPGYINF.S		M[+16]	845.42	2	1689.83	1689.82	0	7	17	Non	192.51	192.51	19.92	2.32	1278	>sp|P02817|AMELX_BOVIN Amelogenin, X isoform OS=Bos taurus OX=9913 GN=AMELX PE=1 SV=2	1	hf1_10472_ebo_28_1_261219.ScanId;v=1;d1=18379.18379.3	controllerType=0 controllerNumber=1 scan=18379	39.7528
20511:3	1	S.MPLPPHPGHPGYIN[+0.984]F.S		N[+1]	558.941	3	1674.81	1674.81	0	-1.1	17	Non	202.62	202.62	202.62	2.29	1278	>sp|P02817|AMELX_BOVIN Amelogenin, X isoform OS=Bos taurus OX=9913 GN=AMELX PE=1 SV=2	1	hf1_10472_ebo_28_1_261219.ScanId;v=1;d1=15780.15780.3	controllerType=0 controllerNumber=1 scan=15780	35.2939
00209:3	1	S.MP[+15.995]LPPHPGHPGYINF.S		P[+16]	563.948	3	1689.83	1689.82	0	5.4	17	Non	206.1	206.1	4	2.79	1278	>sp|P02817|AMELX_BOVIN Amelogenin, X isoform OS=Bos taurus OX=9913 GN=AMELX PE=1 SV=2	1	hf1_10472_ebo_28_1_261219.ScanId;v=1;d1=696.696.3	controllerType=0 controllerNumber=1 scan=696	3.6158
05107:3	1	S.MP[+15.995]LPPHPGHPGYINF.S		P[+16]	563.946	3	1689.82	1689.82	0	1.8	17	Non	214.52	214.52	4	2.3	1278	>sp|P02817|AMELX_BOVIN Amelogenin, X isoform OS=Bos taurus OX=9913 GN=AMELX PE=1 SV=2	1	hf1_10472_ebo_28_1_261219.ScanId;v=1;d1=5282.5282.3	controllerType=0 controllerNumber=1 scan=5282	16.9829
00308:3	1	S.MP[+15.995]LPPHPGHPGYINF.S		P[+16]	563.947	3	1689.83	1689.82	0	4.3	17	Non	221.15	221.15	4	2.88	1278	>sp|P02817|AMELX_BOVIN Amelogenin, X isoform OS=Bos taurus OX=9913 GN=AMELX PE=1 SV=2	1	hf1_10472_ebo_28_1_261219.ScanId;v=1;d1=1290.1290.3	controllerType=0 controllerNumber=1 scan=1290	7.011
46392:3	1	S.MP[+15.995]LPPHPGHPGYINF.S		P[+16]	563.948	3	1689.83	1689.82	0	5.1	17	Non	247.06	247.06	4	4.39	1278	>sp|P02817|AMELX_BOVIN Amelogenin, X isoform OS=Bos taurus OX=9913 GN=AMELX PE=1 SV=2	1	hf1_10472_ebo_28_1_261219.ScanId;v=1;d1=33325.33325.3	controllerType=0 controllerNumber=1 scan=33325	66.2573
00316:3	1	S.MP[+15.995]LPPHPGHPGYINF.S		P[+16]	563.945	3	1689.82	1689.82	0	0.6	17	Non	249.99	249.99	4	3.53	1278	>sp|P02817|AMELX_BOVIN Amelogenin, X isoform OS=Bos taurus OX=9913 GN=AMELX PE=1 SV=2	1	hf1_10472_ebo_28_1_261219.ScanId;v=1;d1=1350.1350.3	controllerType=0 controllerNumber=1 scan=1350	7.354
08127:3	1	S.MP[+15.995]LPPHPGHPGYINF.S		P[+16]	563.949	3	1689.83	1689.82	0	6.5	17	Non	250.02	250.02	4	4.65	1278	>sp|P02817|AMELX_BOVIN Amelogenin, X isoform OS=Bos taurus OX=9913 GN=AMELX PE=1 SV=2	1	hf1_10472_ebo_28_1_261219.ScanId;v=1;d1=7353.7353.3	controllerType=0 controllerNumber=1 scan=7353	20.627
03290:3	1	S.MP[+15.995]LPPHPGHPGYINF.S		P[+16]	563.946	3	1689.82	1689.82	0	2.4	17	Non	250.14	250.14	4	4.15	1278	>sp|P02817|AMELX_BOVIN Amelogenin, X isoform OS=Bos taurus OX=9913 GN=AMELX PE=1 SV=2	1	hf1_10472_ebo_28_1_261219.ScanId;v=1;d1=3998.3998.3	controllerType=0 controllerNumber=1 scan=3998	14.7098
04407:3	1	S.MP[+15.995]LPPHPGHPGYINF.S		P[+16]	563.947	3	1689.83	1689.82	0	3.9	17	Non	257.93	257.93	5.8	4.15	1278	>sp|P02817|AMELX_BOVIN Amelogenin, X isoform OS=Bos taurus OX=9913 GN=AMELX PE=1 SV=2	1	hf1_10472_ebo_28_1_261219.ScanId;v=1;d1=4777.4777.3	controllerType=0 controllerNumber=1 scan=4777	16.0788
00757:2	1	S.MP[+15.995]LPPHPGHPGYINF.S		P[+16]	845.415	2	1689.82	1689.82	0	0.9	17	Non	258.51	258.51	4	3.94	1278	>sp|P02817|AMELX_BOVIN Amelogenin, X isoform OS=Bos taurus OX=9913 GN=AMELX PE=1 SV=2	1	hf1_10472_ebo_28_1_261219.ScanId;v=1;d1=2153.2153.2	controllerType=0 controllerNumber=1 scan=2153	10.9113
46906:3	1	S.MP[+15.995]LPPHPGHPGYINF.S		P[+16]	563.948	3	1689.83	1689.82	0	4.9	17	Non	263.8	263.8	4	4.39	1278	>sp|P02817|AMELX_BOVIN Amelogenin, X isoform OS=Bos taurus OX=9913 GN=AMELX PE=1 SV=2	1	hf1_10472_ebo_28_1_261219.ScanId;v=1;d1=33818.33818.3	controllerType=0 controllerNumber=1 scan=33818	67.6346
47049:3	1	S.MP[+15.995]LPPHPGHPGYINF.S		P[+16]	563.948	3	1689.83	1689.82	0	6.2	17	Non	275.6	275.6	4	4.63	1278	>sp|P02817|AMELX_BOVIN Amelogenin, X isoform OS=Bos taurus OX=9913 GN=AMELX PE=1 SV=2	1	hf1_10472_ebo_28_1_261219.ScanId;v=1;d1=33939.33939.3	controllerType=0 controllerNumber=1 scan=33939	67.9784
02481:3	1	S.MP[+15.995]LPPHPGHPGYINF.S		P[+16]	563.947	3	1689.83	1689.82	0	3.1	17	Non	285.13	285.13	4	4.23	1278	>sp|P02817|AMELX_BOVIN Amelogenin, X isoform OS=Bos taurus OX=9913 GN=AMELX PE=1 SV=2	1	hf1_10472_ebo_28_1_261219.ScanId;v=1;d1=3441.3441.3	controllerType=0 controllerNumber=1 scan=3441	13.7468
18066:3	1	S.MP[+15.995]LPPHPGHPGYINF.S		P[+16]	563.948	3	1689.83	1689.82	0	4.6	17	Non	285.17	285.17	4	4.48	1278	>sp|P02817|AMELX_BOVIN Amelogenin, X isoform OS=Bos taurus OX=9913 GN=AMELX PE=1 SV=2	1	hf1_10472_ebo_28_1_261219.ScanId;v=1;d1=14089.14089.3	controllerType=0 controllerNumber=1 scan=14089	32.3761
00832:3	1	S.MP[+15.995]LPPHPGHPGYINF.S		P[+16]	563.947	3	1689.83	1689.82	0	3.5	17	Non	288.2	288.2	4	4.23	1278	>sp|P02817|AMELX_BOVIN Amelogenin, X isoform OS=Bos taurus OX=9913 GN=AMELX PE=1 SV=2	1	hf1_10472_ebo_28_1_261219.ScanId;v=1;d1=2220.2220.3	controllerType=0 controllerNumber=1 scan=2220	11.116
47179:3	1	S.MP[+15.995]LPPHPGHPGYINF.S		P[+16]	563.946	3	1689.82	1689.82	0	2.4	17	Non	292.52	292.52	4	4.47	1278	>sp|P02817|AMELX_BOVIN Amelogenin, X isoform OS=Bos taurus OX=9913 GN=AMELX PE=1 SV=2	1	hf1_10472_ebo_28_1_261219.ScanId;v=1;d1=34053.34053.3	controllerType=0 controllerNumber=1 scan=34053	68.3178
47671:3	1	S.MP[+15.995]LPPHPGHPGYINF.S		P[+16]	563.948	3	1689.83	1689.82	0	4.5	17	Non	293.72	293.72	4	4.48	1278	>sp|P02817|AMELX_BOVIN Amelogenin, X isoform OS=Bos taurus OX=9913 GN=AMELX PE=1 SV=2	1	hf1_10472_ebo_28_1_261219.ScanId;v=1;d1=34466.34466.3	controllerType=0 controllerNumber=1 scan=34466	69.3522
25165:3	1	S.MP[+15.995]LPPHPGHPGYINF.S		P[+16]	563.948	3	1689.83	1689.82	0	5.1	17	Non	305.21	305.21	5.8	4.48	1278	>sp|P02817|AMELX_BOVIN Amelogenin, X isoform OS=Bos taurus OX=9913 GN=AMELX PE=1 SV=2	1	hf1_10472_ebo_28_1_261219.ScanId;v=1;d1=18933.18933.3	controllerType=0 controllerNumber=1 scan=18933	40.7034
19809:2	1	S.M[+15.995]PLPPHPGHPGYINF.S		M[+16]	845.422	2	1689.84	1689.82	0	9.5	17	Non	305.7	305.7	16.48	4.22	1278	>sp|P02817|AMELX_BOVIN Amelogenin, X isoform OS=Bos taurus OX=9913 GN=AMELX PE=1 SV=2	1	hf1_10472_ebo_28_1_261219.ScanId;v=1;d1=15296.15296.3	controllerType=0 controllerNumber=1 scan=15296	34.4657
11608:3	1	S.MP[+15.995]LPPHPGHPGYINF.S		P[+16]	563.948	3	1689.83	1689.82	0	5.1	17	Non	308.2	308.2	4	4.12	1278	>sp|P02817|AMELX_BOVIN Amelogenin, X isoform OS=Bos taurus OX=9913 GN=AMELX PE=1 SV=2	1	hf1_10472_ebo_28_1_261219.ScanId;v=1;d1=9709.9709.3	controllerType=0 controllerNumber=1 scan=9709	24.7379
09131:3	1	S.MP[+15.995]LPPHPGHPGYINF.S		P[+16]	563.948	3	1689.83	1689.82	0	5.7	17	Non	311.27	311.27	4	4.48	1278	>sp|P02817|AMELX_BOVIN Amelogenin, X isoform OS=Bos taurus OX=9913 GN=AMELX PE=1 SV=2	1	hf1_10472_ebo_28_1_261219.ScanId;v=1;d1=8036.8036.3	controllerType=0 controllerNumber=1 scan=8036	21.8155
00579:3	1	S.MP[+15.995]LPPHPGHPGYINF.S		P[+16]	563.947	3	1689.83	1689.82	0	3.7	17	Non	313.69	313.69	4	4.23	1278	>sp|P02817|AMELX_BOVIN Amelogenin, X isoform OS=Bos taurus OX=9913 GN=AMELX PE=1 SV=2	1	hf1_10472_ebo_28_1_261219.ScanId;v=1;d1=1988.1988.3	controllerType=0 controllerNumber=1 scan=1988	10.4199
02949:3	1	S.MP[+15.995]LPPHPGHPGYINF.S		P[+16]	563.947	3	1689.83	1689.82	0	3.7	17	Non	317.07	317.07	4	4.23	1278	>sp|P02817|AMELX_BOVIN Amelogenin, X isoform OS=Bos taurus OX=9913 GN=AMELX PE=1 SV=2	1	hf1_10472_ebo_28_1_261219.ScanId;v=1;d1=3766.3766.3	controllerType=0 controllerNumber=1 scan=3766	14.3108
09730:3	1	S.MP[+15.995]LPPHPGHPGYINF.S		P[+16]	563.948	3	1689.83	1689.82	0	6.2	17	Non	318.52	318.52	5.8	4.48	1278	>sp|P02817|AMELX_BOVIN Amelogenin, X isoform OS=Bos taurus OX=9913 GN=AMELX PE=1 SV=2	1	hf1_10472_ebo_28_1_261219.ScanId;v=1;d1=8435.8435.3	controllerType=0 controllerNumber=1 scan=8435	22.5084
00921:3	1	S.MP[+15.995]LPPHPGHPGYINF.S		P[+16]	563.948	3	1689.83	1689.82	0	5	17	Non	322.05	322.05	4	4.72	1278	>sp|P02817|AMELX_BOVIN Amelogenin, X isoform OS=Bos taurus OX=9913 GN=AMELX PE=1 SV=2	1	hf1_10472_ebo_28_1_261219.ScanId;v=1;d1=2315.2315.3	controllerType=0 controllerNumber=1 scan=2315	11.4605
01731:3	1	S.MP[+15.995]LPPHPGHPGYINF.S		P[+16]	563.946	3	1689.82	1689.82	0	2.4	17	Non	323.09	323.09	4	4.47	1278	>sp|P02817|AMELX_BOVIN Amelogenin, X isoform OS=Bos taurus OX=9913 GN=AMELX PE=1 SV=2	1	hf1_10472_ebo_28_1_261219.ScanId;v=1;d1=2933.2933.3	controllerType=0 controllerNumber=1 scan=2933	12.8674
23217:2	1	S.MPLPPHPGHPGY[+15.995]INF.S		Y[+16]	845.417	2	1689.83	1689.82	0	3.3	17	Non	329.35	310.37	0	3.89	1278	>sp|P02817|AMELX_BOVIN Amelogenin, X isoform OS=Bos taurus OX=9913 GN=AMELX PE=1 SV=2	1	hf1_10472_ebo_28_1_261219.ScanId;v=1;d1=17634.17634.2	controllerType=0 controllerNumber=1 scan=17634	38.4829
01196:3	1	S.MP[+15.995]LPPHPGHPGYINF.S		P[+16]	563.948	3	1689.83	1689.82	0	5.4	17	Non	332.83	332.83	4	4.72	1278	>sp|P02817|AMELX_BOVIN Amelogenin, X isoform OS=Bos taurus OX=9913 GN=AMELX PE=1 SV=2	1	hf1_10472_ebo_28_1_261219.ScanId;v=1;d1=2548.2548.3	controllerType=0 controllerNumber=1 scan=2548	12.1366
13120:3	1	S.MP[+15.995]LPPHPGHPGYINF.S		P[+16]	563.946	3	1689.82	1689.82	0	1.9	17	Non	336.65	336.65	5.8	3.84	1278	>sp|P02817|AMELX_BOVIN Amelogenin, X isoform OS=Bos taurus OX=9913 GN=AMELX PE=1 SV=2	1	hf1_10472_ebo_28_1_261219.ScanId;v=1;d1=10760.10760.3	controllerType=0 controllerNumber=1 scan=10760	26.5819
12598:3	1	S.MP[+15.995]LPPHPGHPGYINF.S		P[+16]	563.948	3	1689.83	1689.82	0	5.4	17	Non	338.86	338.86	5.8	4.72	1278	>sp|P02817|AMELX_BOVIN Amelogenin, X isoform OS=Bos taurus OX=9913 GN=AMELX PE=1 SV=2	1	hf1_10472_ebo_28_1_261219.ScanId;v=1;d1=10407.10407.3	controllerType=0 controllerNumber=1 scan=10407	25.9658
20453:2	1	S.M[+15.995]PLPPHPGHPGYINF.S		M[+16]	845.418	2	1689.83	1689.82	0	4.9	17	Non	344.46	344.46	14.64	5.08	1278	>sp|P02817|AMELX_BOVIN Amelogenin, X isoform OS=Bos taurus OX=9913 GN=AMELX PE=1 SV=2	1	hf1_10472_ebo_28_1_261219.ScanId;v=1;d1=15740.15740.3	controllerType=0 controllerNumber=1 scan=15740	35.2244
12319:3	1	S.MP[+15.995]LPPHPGHPGYINF.S		P[+16]	563.947	3	1689.83	1689.82	0	3.1	17	Non	350.84	350.84	4	4.7	1278	>sp|P02817|AMELX_BOVIN Amelogenin, X isoform OS=Bos taurus OX=9913 GN=AMELX PE=1 SV=2	1	hf1_10472_ebo_28_1_261219.ScanId;v=1;d1=10209.10209.3	controllerType=0 controllerNumber=1 scan=10209	25.617
20752:2	1	S.M[+15.995]PLPPHPGHPGYINF.S		M[+16]	845.418	2	1689.83	1689.82	0	5.3	17	Non	357.32	357.32	17.19	4.9	1278	>sp|P02817|AMELX_BOVIN Amelogenin, X isoform OS=Bos taurus OX=9913 GN=AMELX PE=1 SV=2	1	hf1_10472_ebo_28_1_261219.ScanId;v=1;d1=15947.15947.3	controllerType=0 controllerNumber=1 scan=15947	35.5778
01063:3	1	S.MP[+15.995]LPPHPGHPGYINF.S		P[+16]	563.947	3	1689.83	1689.82	0	4.1	17	Non	358.21	358.21	4	4.7	1278	>sp|P02817|AMELX_BOVIN Amelogenin, X isoform OS=Bos taurus OX=9913 GN=AMELX PE=1 SV=2	1	hf1_10472_ebo_28_1_261219.ScanId;v=1;d1=2435.2435.3	controllerType=0 controllerNumber=1 scan=2435	11.8018
22432:3	1	S.MPLPP[+15.995]HPGHPGYINF.S		P[+16]	563.947	3	1689.83	1689.82	0	4.1	17	Non	368.02	368.02	1.25	5.41	1278	>sp|P02817|AMELX_BOVIN Amelogenin, X isoform OS=Bos taurus OX=9913 GN=AMELX PE=1 SV=2	1	hf1_10472_ebo_28_1_261219.ScanId;v=1;d1=17104.17104.3	controllerType=0 controllerNumber=1 scan=17104	37.5778
24383:3	1	S.MPLP[+15.995]PHPGHPGYINF.S		P[+16]	563.948	3	1689.83	1689.82	0	4.8	17	Non	368.42	368.42	11.37	5.89	1278	>sp|P02817|AMELX_BOVIN Amelogenin, X isoform OS=Bos taurus OX=9913 GN=AMELX PE=1 SV=2	1	hf1_10472_ebo_28_1_261219.ScanId;v=1;d1=18416.18416.3	controllerType=0 controllerNumber=1 scan=18416	39.8138
47318:3	1	S.MP[+15.995]LPPHPGHPGYINF.S		P[+16]	563.948	3	1689.83	1689.82	0	4.9	17	Non	368.54	368.54	4	6.07	1278	>sp|P02817|AMELX_BOVIN Amelogenin, X isoform OS=Bos taurus OX=9913 GN=AMELX PE=1 SV=2	1	hf1_10472_ebo_28_1_261219.ScanId;v=1;d1=34176.34176.3	controllerType=0 controllerNumber=1 scan=34176	68.659
08836:3	1	S.MP[+15.995]LPPHPGHPGYINF.S		P[+16]	563.947	3	1689.83	1689.82	0	3.1	17	Non	370.41	370.41	4	5.82	1278	>sp|P02817|AMELX_BOVIN Amelogenin, X isoform OS=Bos taurus OX=9913 GN=AMELX PE=1 SV=2	1	hf1_10472_ebo_28_1_261219.ScanId;v=1;d1=7837.7837.3	controllerType=0 controllerNumber=1 scan=7837	21.4694
01431:3	1	S.MP[+15.995]LPPHPGHPGYINF.S		P[+16]	563.945	3	1689.82	1689.82	0	0.7	17	Non	372.36	372.36	4	5.01	1278	>sp|P02817|AMELX_BOVIN Amelogenin, X isoform OS=Bos taurus OX=9913 GN=AMELX PE=1 SV=2	1	hf1_10472_ebo_28_1_261219.ScanId;v=1;d1=2720.2720.3	controllerType=0 controllerNumber=1 scan=2720	12.4911
12051:3	1	S.MP[+15.995]LPPHPGHPGYINF.S		P[+16]	563.948	3	1689.83	1689.82	0	4.9	17	Non	374.71	374.71	5.8	5.89	1278	>sp|P02817|AMELX_BOVIN Amelogenin, X isoform OS=Bos taurus OX=9913 GN=AMELX PE=1 SV=2	1	hf1_10472_ebo_28_1_261219.ScanId;v=1;d1=10010.10010.3	controllerType=0 controllerNumber=1 scan=10010	25.2628
18362:3	1	S.MP[+15.995]LPPHPGHPGYINF.S		P[+16]	563.948	3	1689.83	1689.82	0	4.9	17	Non	375.7	375.7	4	5.89	1278	>sp|P02817|AMELX_BOVIN Amelogenin, X isoform OS=Bos taurus OX=9913 GN=AMELX PE=1 SV=2	1	hf1_10472_ebo_28_1_261219.ScanId;v=1;d1=14290.14290.3	controllerType=0 controllerNumber=1 scan=14290	32.7263
22143:3	1	S.MP[+15.995]LPPHPGHPGYINF.S		P[+16]	563.947	3	1689.83	1689.82	0	2.7	17	Non	376.33	376.33	5.8	5.64	1278	>sp|P02817|AMELX_BOVIN Amelogenin, X isoform OS=Bos taurus OX=9913 GN=AMELX PE=1 SV=2	1	hf1_10472_ebo_28_1_261219.ScanId;v=1;d1=16904.16904.3	controllerType=0 controllerNumber=1 scan=16904	37.2299
21532:3	1	S.MP[+15.995]LPPHPGHPGYINF.S		P[+16]	563.951	3	1689.84	1689.82	0	10	17	Non	383.4	383.4	5.8	5.44	1278	>sp|P02817|AMELX_BOVIN Amelogenin, X isoform OS=Bos taurus OX=9913 GN=AMELX PE=1 SV=2	1	hf1_10472_ebo_28_1_261219.ScanId;v=1;d1=16492.16492.3	controllerType=0 controllerNumber=1 scan=16492	36.521
20361:3	1	S.MP[+15.995]LPPHPGHPGYINF.S		P[+16]	563.95	3	1689.84	1689.82	0	8.6	17	Non	384.4	384.4	4	5.62	1278	>sp|P02817|AMELX_BOVIN Amelogenin, X isoform OS=Bos taurus OX=9913 GN=AMELX PE=1 SV=2	1	hf1_10472_ebo_28_1_261219.ScanId;v=1;d1=15681.15681.3	controllerType=0 controllerNumber=1 scan=15681	35.1252
00006:2	1	S.M[+15.995]PLPPHPGHPGYINF.S		M[+16]	845.419	2	1689.83	1689.82	0	5.5	17	Non	384.98	384.98	11.76	5.84	1278	>sp|P02817|AMELX_BOVIN Amelogenin, X isoform OS=Bos taurus OX=9913 GN=AMELX PE=1 SV=2	1	hf1_10472_ebo_28_1_261219.ScanId;v=1;d1=95.95.2	controllerType=0 controllerNumber=1 scan=95	0.511
21491:3	1	S.MP[+31.990]LPPHPGHPGYINF.S		P[+32]	569.28	3	1705.83	1705.82	0	6.1	17	Non	386.07	386.07	1.8	5.89	1278	>sp|P02817|AMELX_BOVIN Amelogenin, X isoform OS=Bos taurus OX=9913 GN=AMELX PE=1 SV=2	1	hf1_10472_ebo_28_1_261219.ScanId;v=1;d1=16464.16464.3	controllerType=0 controllerNumber=1 scan=16464	36.4718
20951:3	1	S.MP[+15.995]LPPHPGHPGYINF.S		P[+16]	563.95	3	1689.83	1689.82	0	8	17	Non	392.73	392.73	4	6.33	1278	>sp|P02817|AMELX_BOVIN Amelogenin, X isoform OS=Bos taurus OX=9913 GN=AMELX PE=1 SV=2	1	hf1_10472_ebo_28_1_261219.ScanId;v=1;d1=16087.16087.3	controllerType=0 controllerNumber=1 scan=16087	35.8238
00684:3	1	S.MP[+15.995]LPPHPGHPGYINF.S		P[+16]	563.948	3	1689.83	1689.82	0	4.9	17	Non	392.75	392.75	4	5.89	1278	>sp|P02817|AMELX_BOVIN Amelogenin, X isoform OS=Bos taurus OX=9913 GN=AMELX PE=1 SV=2	1	hf1_10472_ebo_28_1_261219.ScanId;v=1;d1=2094.2094.3	controllerType=0 controllerNumber=1 scan=2094	10.7579
20665:3	1	S.MP[+15.995]LPPHPGHPGYINF.S		P[+16]	563.95	3	1689.83	1689.82	0	8.4	17	Non	411.65	411.65	4	5.65	1278	>sp|P02817|AMELX_BOVIN Amelogenin, X isoform OS=Bos taurus OX=9913 GN=AMELX PE=1 SV=2	1	hf1_10472_ebo_28_1_261219.ScanId;v=1;d1=15888.15888.3	controllerType=0 controllerNumber=1 scan=15888	35.4805
21826:3	1	S.MP[+15.995]LPPHPGHPGYINF.S		P[+16]	563.947	3	1689.83	1689.82	0	3.5	17	Non	421.6	421.6	5.8	5.85	1278	>sp|P02817|AMELX_BOVIN Amelogenin, X isoform OS=Bos taurus OX=9913 GN=AMELX PE=1 SV=2	1	hf1_10472_ebo_28_1_261219.ScanId;v=1;d1=16692.16692.3	controllerType=0 controllerNumber=1 scan=16692	36.8684
00411:3	1	S.MP[+15.995]LPPHPGHPGYINF.S		P[+16]	563.947	3	1689.83	1689.82	0	4	17	Non	423.22	423.1	4	5.67	1278	>sp|P02817|AMELX_BOVIN Amelogenin, X isoform OS=Bos taurus OX=9913 GN=AMELX PE=1 SV=2	1	hf1_10472_ebo_28_1_261219.ScanId;v=1;d1=1849.1849.3	controllerType=0 controllerNumber=1 scan=1849	10.0792
18366:2	1	S.M[+15.995]PLPPHPGHPGYINF.S		M[+16]	845.418	2	1689.83	1689.82	0	4.5	17	Non	428.78	357.51	25.63	5.02	1278	>sp|P02817|AMELX_BOVIN Amelogenin, X isoform OS=Bos taurus OX=9913 GN=AMELX PE=1 SV=2	1	hf1_10472_ebo_28_1_261219.ScanId;v=1;d1=14293.14293.2	controllerType=0 controllerNumber=1 scan=14293	32.7308
25219:3	1	S.MPLPPHPGHPGYIN[+0.984]F.S		N[+1]	558.944	3	1674.82	1674.81	0	3.9	17	Non	452.75	452.75	452.75	5.83	1278	>sp|P02817|AMELX_BOVIN Amelogenin, X isoform OS=Bos taurus OX=9913 GN=AMELX PE=1 SV=2	1	hf1_10472_ebo_28_1_261219.ScanId;v=1;d1=18970.18970.3	controllerType=0 controllerNumber=1 scan=18970	40.7678
23023:3	1	S.MPLPPHPGHP[+15.995]GYINF.S		P[+16]	563.948	3	1689.83	1689.82	0	4.5	17	Non	465.42	465.42	7.86	6.08	1278	>sp|P02817|AMELX_BOVIN Amelogenin, X isoform OS=Bos taurus OX=9913 GN=AMELX PE=1 SV=2	1	hf1_10472_ebo_28_1_261219.ScanId;v=1;d1=17502.17502.3	controllerType=0 controllerNumber=1 scan=17502	38.2651
22559:2	1	S.MPLPPHPGH[+15.995]PGYINF.S		H[+16]	845.419	2	1689.83	1689.82	0	6.3	17	Non	483.12	434.95	2.09	5.94	1278	>sp|P02817|AMELX_BOVIN Amelogenin, X isoform OS=Bos taurus OX=9913 GN=AMELX PE=1 SV=2	1	hf1_10472_ebo_28_1_261219.ScanId;v=1;d1=17194.17194.2	controllerType=0 controllerNumber=1 scan=17194	37.7318
24923:3	1	S.MPLPPHPGHPGYIN[+0.984]F.S		N[+1]	558.946	3	1674.82	1674.81	0	8.9	17	Non	486.53	486.53	486.53	5.71	1278	>sp|P02817|AMELX_BOVIN Amelogenin, X isoform OS=Bos taurus OX=9913 GN=AMELX PE=1 SV=2	1	hf1_10472_ebo_28_1_261219.ScanId;v=1;d1=18772.18772.3	controllerType=0 controllerNumber=1 scan=18772	40.4278
25523:3	1	S.MPLPPHPGHPGYIN[+0.984]F.S		N[+1]	558.944	3	1674.82	1674.81	0	5.4	17	Non	495.43	495.43	495.43	6.22	1278	>sp|P02817|AMELX_BOVIN Amelogenin, X isoform OS=Bos taurus OX=9913 GN=AMELX PE=1 SV=2	1	hf1_10472_ebo_28_1_261219.ScanId;v=1;d1=19173.19173.3	controllerType=0 controllerNumber=1 scan=19173	41.1205
22917:2	1	S.MPLPPHPGH[+15.995]PGYINF.S		H[+16]	845.419	2	1689.83	1689.82	0	5.6	17	Non	508.41	454.53	0.14	5.94	1278	>sp|P02817|AMELX_BOVIN Amelogenin, X isoform OS=Bos taurus OX=9913 GN=AMELX PE=1 SV=2	1	hf1_10472_ebo_28_1_261219.ScanId;v=1;d1=17430.17430.2	controllerType=0 controllerNumber=1 scan=17430	38.1393
22722:3	1	S.MPLPPHPGHP[+15.995]GYINF.S		P[+16]	563.948	3	1689.83	1689.82	0	4.9	17	Non	514.31	514.31	8.46	6.16	1278	>sp|P02817|AMELX_BOVIN Amelogenin, X isoform OS=Bos taurus OX=9913 GN=AMELX PE=1 SV=2	1	hf1_10472_ebo_28_1_261219.ScanId;v=1;d1=17304.17304.3	controllerType=0 controllerNumber=1 scan=17304	37.9242
24975:2	1	S.MPLPPHPGHPGYIN[+0.984]F.S		N[+1]	837.913	2	1674.82	1674.81	0	5.6	17	Non	560.32	534.8	534.8	7.01	1278	>sp|P02817|AMELX_BOVIN Amelogenin, X isoform OS=Bos taurus OX=9913 GN=AMELX PE=1 SV=2	1	hf1_10472_ebo_28_1_261219.ScanId;v=1;d1=18807.18807.2	controllerType=0 controllerNumber=1 scan=18807	40.4876
20161:2	1	S.M[+15.995]PLPPHPGHPGYINF.S		M[+16]	845.417	2	1689.83	1689.82	0	4	17	Non	592.35	463.35	54.12	6.76	1278	>sp|P02817|AMELX_BOVIN Amelogenin, X isoform OS=Bos taurus OX=9913 GN=AMELX PE=1 SV=2	1	hf1_10472_ebo_28_1_261219.ScanId;v=1;d1=15540.15540.2	controllerType=0 controllerNumber=1 scan=15540	34.8857
21027:2	1	S.M[+15.995]PLPPHPGHPGYINF.S		M[+16]	845.418	2	1689.83	1689.82	0	4.9	17	Non	596.2	527.09	63.48	7.07	1278	>sp|P02817|AMELX_BOVIN Amelogenin, X isoform OS=Bos taurus OX=9913 GN=AMELX PE=1 SV=2	1	hf1_10472_ebo_28_1_261219.ScanId;v=1;d1=16142.16142.2	controllerType=0 controllerNumber=1 scan=16142	35.9152
21612:2	1	S.M[+15.995]PLPPHPGHPGYINF.S		M[+16]	845.419	2	1689.83	1689.82	0	5.8	17	Non	607.15	518.6	48.65	8.01	1278	>sp|P02817|AMELX_BOVIN Amelogenin, X isoform OS=Bos taurus OX=9913 GN=AMELX PE=1 SV=2	1	hf1_10472_ebo_28_1_261219.ScanId;v=1;d1=16547.16547.2	controllerType=0 controllerNumber=1 scan=16547	36.6153
24657:2	1	S.MPLPPHPGHPGYIN[+0.984]F.S		N[+1]	837.914	2	1674.82	1674.81	0	6.5	17	Non	609.24	595.67	595.67	8.27	1278	>sp|P02817|AMELX_BOVIN Amelogenin, X isoform OS=Bos taurus OX=9913 GN=AMELX PE=1 SV=2	1	hf1_10472_ebo_28_1_261219.ScanId;v=1;d1=18597.18597.2	controllerType=0 controllerNumber=1 scan=18597	40.1258
20746:2	1	S.M[+15.995]PLPPHPGHPGYINF.S		M[+16]	845.418	2	1689.83	1689.82	0	5.3	17	Non	623.89	532.3	66.98	8.01	1278	>sp|P02817|AMELX_BOVIN Amelogenin, X isoform OS=Bos taurus OX=9913 GN=AMELX PE=1 SV=2	1	hf1_10472_ebo_28_1_261219.ScanId;v=1;d1=15943.15943.2	controllerType=0 controllerNumber=1 scan=15943	35.5725
21897:2	1	S.M[+15.995]PLPPHPGHPGYINF.S		M[+16]	845.417	2	1689.83	1689.82	0	4	17	Non	633.44	519.36	52.38	7.76	1278	>sp|P02817|AMELX_BOVIN Amelogenin, X isoform OS=Bos taurus OX=9913 GN=AMELX PE=1 SV=2	1	hf1_10472_ebo_28_1_261219.ScanId;v=1;d1=16742.16742.2	controllerType=0 controllerNumber=1 scan=16742	36.9564
20450:2	1	S.M[+15.995]PLPPHPGHPGYINF.S		M[+16]	845.418	2	1689.83	1689.82	0	4.9	17	Non	650.99	562.32	65.08	9.07	1278	>sp|P02817|AMELX_BOVIN Amelogenin, X isoform OS=Bos taurus OX=9913 GN=AMELX PE=1 SV=2	1	hf1_10472_ebo_28_1_261219.ScanId;v=1;d1=15738.15738.2	controllerType=0 controllerNumber=1 scan=15738	35.223
21321:2	1	S.M[+15.995]PLPPHPGHPGYINF.S		M[+16]	845.419	2	1689.83	1689.82	0	6.4	17	Non	677.74	556.2	52.13	9.32	1278	>sp|P02817|AMELX_BOVIN Amelogenin, X isoform OS=Bos taurus OX=9913 GN=AMELX PE=1 SV=2	1	hf1_10472_ebo_28_1_261219.ScanId;v=1;d1=16345.16345.2	controllerType=0 controllerNumber=1 scan=16345	36.2651
46888:2	1	S.M[+15.995]PLPPHPGHPGYIN[+0.984]F.S		M[+16], N[+1]	845.907	2	1690.81	1690.8	0	1.1	17	Non	54.02	54.02	20.69	0.51	1278	>sp|P02817|AMELX_BOVIN Amelogenin, X isoform OS=Bos taurus OX=9913 GN=AMELX PE=1 SV=2	1	hf1_10472_ebo_28_1_261219.ScanId;v=1;d1=33805.33805.3	controllerType=0 controllerNumber=1 scan=33805	67.6008
24577:3	1	S.MP[+15.995]LPP[+15.995]HPGHPGYINF.S		P[+16]*2	569.278	3	1705.82	1705.82	0	3.1	17	Non	122.78	122.78	0	1.51	1278	>sp|P02817|AMELX_BOVIN Amelogenin, X isoform OS=Bos taurus OX=9913 GN=AMELX PE=1 SV=2	1	hf1_10472_ebo_28_1_261219.ScanId;v=1;d1=18544.18544.3	controllerType=0 controllerNumber=1 scan=18544	40.0335
24542:2	1	S.M[+15.995]PLPPHPGH[+15.995]PGYINF.S		H[+16], M[+16]	853.419	2	1705.83	1705.82	0	8.8	17	Non	147.26	147.26	0	1.14	1278	>sp|P02817|AMELX_BOVIN Amelogenin, X isoform OS=Bos taurus OX=9913 GN=AMELX PE=1 SV=2	1	hf1_10472_ebo_28_1_261219.ScanId;v=1;d1=18517.18517.3	controllerType=0 controllerNumber=1 scan=18517	39.9874
00014:3	1	S.MP[+15.995]LPPHPGHPGY[+15.995]INF.S		P[+16], Y[+16]	569.281	3	1705.83	1705.82	0	8.1	17	Non	190.17	190.17	3.86	2.84	1278	>sp|P02817|AMELX_BOVIN Amelogenin, X isoform OS=Bos taurus OX=9913 GN=AMELX PE=1 SV=2	1	hf1_10472_ebo_28_1_261219.ScanId;v=1;d1=101.101.3	controllerType=0 controllerNumber=1 scan=101	0.5229
20381:3	1	S.MP[+15.995]LP[+15.995]PHPGHPGYINF.S		P[+16]*2	569.279	3	1705.82	1705.82	0	4.6	17	Non	237.96	237.96	1.57	2.79	1278	>sp|P02817|AMELX_BOVIN Amelogenin, X isoform OS=Bos taurus OX=9913 GN=AMELX PE=1 SV=2	1	hf1_10472_ebo_28_1_261219.ScanId;v=1;d1=15692.15692.3	controllerType=0 controllerNumber=1 scan=15692	35.1431
20086:3	1	S.MP[+15.995]LPPHPGHP[+15.995]GYINF.S		P[+16]*2	569.28	3	1705.83	1705.82	0	6	17	Non	325.49	325.49	3.34	4.72	1278	>sp|P02817|AMELX_BOVIN Amelogenin, X isoform OS=Bos taurus OX=9913 GN=AMELX PE=1 SV=2	1	hf1_10472_ebo_28_1_261219.ScanId;v=1;d1=15486.15486.3	controllerType=0 controllerNumber=1 scan=15486	34.7925
19208:3	1	S.MP[+15.995]LPPHPGHP[+15.995]GYINF.S		P[+16]*2	569.282	3	1705.83	1705.82	0	8.7	17	Non	342.63	342.63	4	4.5	1278	>sp|P02817|AMELX_BOVIN Amelogenin, X isoform OS=Bos taurus OX=9913 GN=AMELX PE=1 SV=2	1	hf1_10472_ebo_28_1_261219.ScanId;v=1;d1=14883.14883.3	controllerType=0 controllerNumber=1 scan=14883	33.7625
19794:3	1	S.MP[+15.995]LPPHPGHP[+15.995]GYINF.S		P[+16]*2	569.278	3	1705.82	1705.82	0	2.6	17	Non	353.22	353.22	4	4.7	1278	>sp|P02817|AMELX_BOVIN Amelogenin, X isoform OS=Bos taurus OX=9913 GN=AMELX PE=1 SV=2	1	hf1_10472_ebo_28_1_261219.ScanId;v=1;d1=15287.15287.3	controllerType=0 controllerNumber=1 scan=15287	34.4539
19503:3	1	S.MP[+15.995]LPPHPGHP[+15.995]GYINF.S		P[+16]*2	569.279	3	1705.82	1705.82	0	4	17	Non	357.75	357.75	4	4.7	1278	>sp|P02817|AMELX_BOVIN Amelogenin, X isoform OS=Bos taurus OX=9913 GN=AMELX PE=1 SV=2	1	hf1_10472_ebo_28_1_261219.ScanId;v=1;d1=15085.15085.3	controllerType=0 controllerNumber=1 scan=15085	34.1105
22144:3	1	S.MP[+15.995]LPPHPGHPGYIN[+0.984]F.S		N[+1], P[+16]	564.276	3	1690.81	1690.8	0	5.4	17	Non	373.73	373.73	5.8	5.89	1278	>sp|P02817|AMELX_BOVIN Amelogenin, X isoform OS=Bos taurus OX=9913 GN=AMELX PE=1 SV=2	1	hf1_10472_ebo_28_1_261219.ScanId;v=1;d1=16904.16904.3	controllerType=0 controllerNumber=1 scan=16904	37.2299
19364:2	1	S.M[+15.995]PLPPHPGHP[+15.995]GYINF.S		M[+16], P[+16]	853.418	2	1705.83	1705.82	0	7.6	17	Non	405.19	405.19	11.95	6.31	1278	>sp|P02817|AMELX_BOVIN Amelogenin, X isoform OS=Bos taurus OX=9913 GN=AMELX PE=1 SV=2	1	hf1_10472_ebo_28_1_261219.ScanId;v=1;d1=14992.14992.2	controllerType=0 controllerNumber=1 scan=14992	33.9496
19676:2	1	S.M[+15.995]PLPPHPGHP[+15.995]GYINF.S		M[+16], P[+16]	853.414	2	1705.82	1705.82	0	2.8	17	Non	491.76	491.76	1.14	5.68	1278	>sp|P02817|AMELX_BOVIN Amelogenin, X isoform OS=Bos taurus OX=9913 GN=AMELX PE=1 SV=2	1	hf1_10472_ebo_28_1_261219.ScanId;v=1;d1=15205.15205.2	controllerType=0 controllerNumber=1 scan=15205	34.3118
23100:3	1	S.MPLPPHPGHPGYINFS.Y			587.625	3	1760.86	1760.86	0	2.1	17	Non	190.54	150.19	150.19	1.01	1278	>sp|P02817|AMELX_BOVIN Amelogenin, X isoform OS=Bos taurus OX=9913 GN=AMELX PE=1 SV=2	1	hf1_10472_ebo_28_1_261219.ScanId;v=1;d1=17554.17554.3	controllerType=0 controllerNumber=1 scan=17554	38.3502
21683:3	1	S.MPLPPHPGHPGYINFS.Y			587.628	3	1760.87	1760.86	0	7	17	Non	296.93	60.47	60.47	2.52	1278	>sp|P02817|AMELX_BOVIN Amelogenin, X isoform OS=Bos taurus OX=9913 GN=AMELX PE=1 SV=2	1	hf1_10472_ebo_28_1_261219.ScanId;v=1;d1=16592.16592.3	controllerType=0 controllerNumber=1 scan=16592	36.6922
22380:3	1	S.MPLPPHPGHPGYINFS.Y			587.627	3	1760.87	1760.86	0	5	17	Non	311.21	131.78	131.78	3.27	1278	>sp|P02817|AMELX_BOVIN Amelogenin, X isoform OS=Bos taurus OX=9913 GN=AMELX PE=1 SV=2	1	hf1_10472_ebo_28_1_261219.ScanId;v=1;d1=17069.17069.3	controllerType=0 controllerNumber=1 scan=17069	37.521
22625:2	1	S.MPLPPHPGHPGYINFS.Y			880.937	2	1760.87	1760.86	0	4.5	17	Non	326.48	283.82	283.82	4.5	1278	>sp|P02817|AMELX_BOVIN Amelogenin, X isoform OS=Bos taurus OX=9913 GN=AMELX PE=1 SV=2	1	hf1_10472_ebo_28_1_261219.ScanId;v=1;d1=17239.17239.2	controllerType=0 controllerNumber=1 scan=17239	37.8121
21964:3	1	S.MPLPPHPGHPGYINFS.Y			587.627	3	1760.87	1760.86	0	4.8	17	Non	392.25	169.74	169.74	4.08	1278	>sp|P02817|AMELX_BOVIN Amelogenin, X isoform OS=Bos taurus OX=9913 GN=AMELX PE=1 SV=2	1	hf1_10472_ebo_28_1_261219.ScanId;v=1;d1=16786.16786.3	controllerType=0 controllerNumber=1 scan=16786	37.0326
27028:3	1	S.MPLPPHPGHPGYINFS[+79.966].Y		S[+80]	614.284	3	1840.84	1840.82	0	7	17	Non	6.76	6.76	6.76	0.26	1278	>sp|P02817|AMELX_BOVIN Amelogenin, X isoform OS=Bos taurus OX=9913 GN=AMELX PE=1 SV=2	1	hf1_10472_ebo_28_1_261219.ScanId;v=1;d1=20197.20197.3	controllerType=0 controllerNumber=1 scan=20197	42.8918
00498:3	1	S.MPLPPHPGHPGYINFS[+79.966].Y		S[+80]	614.282	3	1840.83	1840.82	0	4.1	17	Non	40.96	40.96	40.96	0.28	1278	>sp|P02817|AMELX_BOVIN Amelogenin, X isoform OS=Bos taurus OX=9913 GN=AMELX PE=1 SV=2	1	hf1_10472_ebo_28_1_261219.ScanId;v=1;d1=1913.1913.3	controllerType=0 controllerNumber=1 scan=1913	10.1913
49156:2	1	S.MPLPPHPGHPGYINFS[+79.966].Y		S[+80]	920.922	2	1840.84	1840.82	0	7.3	17	Non	46.99	46.99	46.99	0.75	1278	>sp|P02817|AMELX_BOVIN Amelogenin, X isoform OS=Bos taurus OX=9913 GN=AMELX PE=1 SV=2	1	hf1_10472_ebo_28_1_261219.ScanId;v=1;d1=35893.35893.2	controllerType=0 controllerNumber=1 scan=35893	73.5458
00541:3	1	S.MPLPPHPGHPGYINFS[+79.966].Y		S[+80]	614.282	3	1840.83	1840.82	0	4.6	17	Non	53.31	53.31	53.31	0.48	1278	>sp|P02817|AMELX_BOVIN Amelogenin, X isoform OS=Bos taurus OX=9913 GN=AMELX PE=1 SV=2	1	hf1_10472_ebo_28_1_261219.ScanId;v=1;d1=1944.1944.3	controllerType=0 controllerNumber=1 scan=1944	10.249
24885:2	1	S.MPLPPHPGHPGYINFS[+79.966].Y		S[+80]	920.921	2	1840.84	1840.82	0	6.2	17	Non	111.59	111.59	60.2	1.17	1278	>sp|P02817|AMELX_BOVIN Amelogenin, X isoform OS=Bos taurus OX=9913 GN=AMELX PE=1 SV=2	1	hf1_10472_ebo_28_1_261219.ScanId;v=1;d1=18747.18747.4	controllerType=0 controllerNumber=1 scan=18747	40.3824
23652:2	1	S.MPLPPHPGHPGYINFS[+79.966].Y		S[+80]	920.922	2	1840.84	1840.82	0	7.3	17	Non	137.45	137.45	77.82	2.38	1278	>sp|P02817|AMELX_BOVIN Amelogenin, X isoform OS=Bos taurus OX=9913 GN=AMELX PE=1 SV=2	1	hf1_10472_ebo_28_1_261219.ScanId;v=1;d1=17926.17926.3	controllerType=0 controllerNumber=1 scan=17926	38.9832
23977:2	1	S.MPLPPHPGHPGYINFS[+79.966].Y		S[+80]	920.921	2	1840.83	1840.82	0	5.8	17	Non	188.62	188.62	108.19	2.62	1278	>sp|P02817|AMELX_BOVIN Amelogenin, X isoform OS=Bos taurus OX=9913 GN=AMELX PE=1 SV=2	1	hf1_10472_ebo_28_1_261219.ScanId;v=1;d1=18143.18143.3	controllerType=0 controllerNumber=1 scan=18143	39.3512
24686:2	1	S.MPLPPHPGHPGYINFS[+79.966].Y		S[+80]	920.922	2	1840.84	1840.82	0	6.8	17	Non	256.51	256.51	120.39	4.6	1278	>sp|P02817|AMELX_BOVIN Amelogenin, X isoform OS=Bos taurus OX=9913 GN=AMELX PE=1 SV=2	1	hf1_10472_ebo_28_1_261219.ScanId;v=1;d1=18616.18616.3	controllerType=0 controllerNumber=1 scan=18616	40.1567
19467:3	1	S.MP[+15.995]LPPHPGHPGYINFS.Y		P[+16]	592.959	3	1776.86	1776.85	0	5.1	17	Non	263	204.38	4	4.11	1278	>sp|P02817|AMELX_BOVIN Amelogenin, X isoform OS=Bos taurus OX=9913 GN=AMELX PE=1 SV=2	1	hf1_10472_ebo_28_1_261219.ScanId;v=1;d1=15059.15059.3	controllerType=0 controllerNumber=1 scan=15059	34.0635
25756:3	1	S.MPLPPHPGHPGYINFS[+79.966].Y		S[+80]	614.284	3	1840.84	1840.82	0	7.5	17	Non	284.31	284.31	163.38	4.74	1278	>sp|P02817|AMELX_BOVIN Amelogenin, X isoform OS=Bos taurus OX=9913 GN=AMELX PE=1 SV=2	1	hf1_10472_ebo_28_1_261219.ScanId;v=1;d1=19327.19327.3	controllerType=0 controllerNumber=1 scan=19327	41.3896
19772:3	1	S.MP[+15.995]LPPHPGHPGYINFS.Y		P[+16]	592.958	3	1776.86	1776.85	0	4.7	17	Non	294.08	220.99	4	4.11	1278	>sp|P02817|AMELX_BOVIN Amelogenin, X isoform OS=Bos taurus OX=9913 GN=AMELX PE=1 SV=2	1	hf1_10472_ebo_28_1_261219.ScanId;v=1;d1=15272.15272.3	controllerType=0 controllerNumber=1 scan=15272	34.4259
49112:3	1	S.MPLPPHPGHPGYINFS[+79.966].Y		S[+80]	614.284	3	1840.84	1840.82	0	7	17	Non	298.87	298.87	205.63	4.97	1278	>sp|P02817|AMELX_BOVIN Amelogenin, X isoform OS=Bos taurus OX=9913 GN=AMELX PE=1 SV=2	1	hf1_10472_ebo_28_1_261219.ScanId;v=1;d1=35863.35863.3	controllerType=0 controllerNumber=1 scan=35863	73.4922
00442:3	1	S.MPLPPHPGHPGYINFS[+79.966].Y		S[+80]	614.283	3	1840.83	1840.82	0	5.3	17	Non	309.46	309.46	199.48	4.48	1278	>sp|P02817|AMELX_BOVIN Amelogenin, X isoform OS=Bos taurus OX=9913 GN=AMELX PE=1 SV=2	1	hf1_10472_ebo_28_1_261219.ScanId;v=1;d1=1872.1872.3	controllerType=0 controllerNumber=1 scan=1872	10.1188
19171:3	1	S.MP[+15.995]LPPHPGHPGYINFS.Y		P[+16]	592.958	3	1776.86	1776.85	0	4.7	17	Non	320.73	218.6	4	4.18	1278	>sp|P02817|AMELX_BOVIN Amelogenin, X isoform OS=Bos taurus OX=9913 GN=AMELX PE=1 SV=2	1	hf1_10472_ebo_28_1_261219.ScanId;v=1;d1=14858.14858.3	controllerType=0 controllerNumber=1 scan=14858	33.7182
25462:3	1	S.MPLPPHPGHPGYINFS[+79.966].Y		S[+80]	614.285	3	1840.84	1840.82	0	8.5	17	Non	325.12	325.12	187.13	4.27	1278	>sp|P02817|AMELX_BOVIN Amelogenin, X isoform OS=Bos taurus OX=9913 GN=AMELX PE=1 SV=2	1	hf1_10472_ebo_28_1_261219.ScanId;v=1;d1=19129.19129.3	controllerType=0 controllerNumber=1 scan=19129	41.0455
18612:3	1	S.MP[+15.995]LPPHPGHPGYINFS.Y		P[+16]	592.958	3	1776.86	1776.85	0	4.6	17	Non	353.2	282.61	4	4.78	1278	>sp|P02817|AMELX_BOVIN Amelogenin, X isoform OS=Bos taurus OX=9913 GN=AMELX PE=1 SV=2	1	hf1_10472_ebo_28_1_261219.ScanId;v=1;d1=14467.14467.3	controllerType=0 controllerNumber=1 scan=14467	33.0341
25153:3	1	S.MPLPPHPGHPGYINFS[+79.966].Y		S[+80]	614.284	3	1840.84	1840.82	0	6.6	17	Non	371.92	371.92	220.55	6.15	1278	>sp|P02817|AMELX_BOVIN Amelogenin, X isoform OS=Bos taurus OX=9913 GN=AMELX PE=1 SV=2	1	hf1_10472_ebo_28_1_261219.ScanId;v=1;d1=18924.18924.3	controllerType=0 controllerNumber=1 scan=18924	40.6882
23625:3	1	S.MPLPPHPGHPGYINFS[+79.966].Y		S[+80]	614.284	3	1840.84	1840.82	0	6.6	17	Non	380.08	320.49	239.74	5.3	1278	>sp|P02817|AMELX_BOVIN Amelogenin, X isoform OS=Bos taurus OX=9913 GN=AMELX PE=1 SV=2	1	hf1_10472_ebo_28_1_261219.ScanId;v=1;d1=17907.17907.3	controllerType=0 controllerNumber=1 scan=17907	38.9491
18605:2	1	S.M[+15.995]PLPPHPGHPGYINFS.Y		M[+16]	888.936	2	1776.86	1776.85	0	6.5	17	Non	409.86	323.3	29.7	5.28	1278	>sp|P02817|AMELX_BOVIN Amelogenin, X isoform OS=Bos taurus OX=9913 GN=AMELX PE=1 SV=2	1	hf1_10472_ebo_28_1_261219.ScanId;v=1;d1=14463.14463.2	controllerType=0 controllerNumber=1 scan=14463	33.0288
24233:3	1	S.MPLPPHPGHPGYINFS[+79.966].Y		S[+80]	614.284	3	1840.84	1840.82	0	8.1	17	Non	438.43	438.43	264.89	6.41	1278	>sp|P02817|AMELX_BOVIN Amelogenin, X isoform OS=Bos taurus OX=9913 GN=AMELX PE=1 SV=2	1	hf1_10472_ebo_28_1_261219.ScanId;v=1;d1=18321.18321.3	controllerType=0 controllerNumber=1 scan=18321	39.6555
24544:3	1	S.MPLPPHPGHPGYINFS[+79.966].Y		S[+80]	614.285	3	1840.84	1840.82	0	8.3	17	Non	461.64	461.64	286.19	6.39	1278	>sp|P02817|AMELX_BOVIN Amelogenin, X isoform OS=Bos taurus OX=9913 GN=AMELX PE=1 SV=2	1	hf1_10472_ebo_28_1_261219.ScanId;v=1;d1=18519.18519.3	controllerType=0 controllerNumber=1 scan=18519	39.9931
24842:3	1	S.MPLPPHPGHPGYINFS[+79.966].Y		S[+80]	614.284	3	1840.84	1840.82	0	7.8	17	Non	470.89	408.51	300.19	6.39	1278	>sp|P02817|AMELX_BOVIN Amelogenin, X isoform OS=Bos taurus OX=9913 GN=AMELX PE=1 SV=2	1	hf1_10472_ebo_28_1_261219.ScanId;v=1;d1=18717.18717.3	controllerType=0 controllerNumber=1 scan=18717	40.3339
23931:3	1	S.MPLPPHPGHPGYINFS[+79.966].Y		S[+80]	614.284	3	1840.84	1840.82	0	7.1	17	Non	503.97	503.97	306.31	7.1	1278	>sp|P02817|AMELX_BOVIN Amelogenin, X isoform OS=Bos taurus OX=9913 GN=AMELX PE=1 SV=2	1	hf1_10472_ebo_28_1_261219.ScanId;v=1;d1=18112.18112.3	controllerType=0 controllerNumber=1 scan=18112	39.3021
25464:2	1	S.MPLPPHPGHPGYINFS[+79.966].Y		S[+80]	920.922	2	1840.84	1840.82	0	6.9	17	Non	571.51	437.94	308.41	7.32	1278	>sp|P02817|AMELX_BOVIN Amelogenin, X isoform OS=Bos taurus OX=9913 GN=AMELX PE=1 SV=2	1	hf1_10472_ebo_28_1_261219.ScanId;v=1;d1=19130.19130.2	controllerType=0 controllerNumber=1 scan=19130	41.0466
23641:2	1	S.MPLPPHPGHPGYINFS[+79.966].Y		S[+80]	920.922	2	1840.84	1840.82	0	6.4	17	Non	599.12	599.12	259.62	7.32	1278	>sp|P02817|AMELX_BOVIN Amelogenin, X isoform OS=Bos taurus OX=9913 GN=AMELX PE=1 SV=2	1	hf1_10472_ebo_28_1_261219.ScanId;v=1;d1=17918.17918.2	controllerType=0 controllerNumber=1 scan=17918	38.9685
25156:2	1	S.MPLPPHPGHPGYINFS[+79.966].Y		S[+80]	920.922	2	1840.84	1840.82	0	6.3	17	Non	603.2	603.2	326.83	8.69	1278	>sp|P02817|AMELX_BOVIN Amelogenin, X isoform OS=Bos taurus OX=9913 GN=AMELX PE=1 SV=2	1	hf1_10472_ebo_28_1_261219.ScanId;v=1;d1=18927.18927.2	controllerType=0 controllerNumber=1 scan=18927	40.6949
24247:2	1	S.MPLPPHPGHPGYINFS[+79.966].Y		S[+80]	920.921	2	1840.84	1840.82	0	6.1	17	Non	696.59	696.59	355.37	9.69	1278	>sp|P02817|AMELX_BOVIN Amelogenin, X isoform OS=Bos taurus OX=9913 GN=AMELX PE=1 SV=2	1	hf1_10472_ebo_28_1_261219.ScanId;v=1;d1=18332.18332.2	controllerType=0 controllerNumber=1 scan=18332	39.6726
24559:2	1	S.MPLPPHPGHPGYINFS[+79.966].Y		S[+80]	920.921	2	1840.84	1840.82	0	6.3	17	Non	709.71	709.71	329.49	10.69	1278	>sp|P02817|AMELX_BOVIN Amelogenin, X isoform OS=Bos taurus OX=9913 GN=AMELX PE=1 SV=2	1	hf1_10472_ebo_28_1_261219.ScanId;v=1;d1=18530.18530.2	controllerType=0 controllerNumber=1 scan=18530	40.012
23945:2	1	S.MPLPPHPGHPGYINFS[+79.966].Y		S[+80]	920.921	2	1840.83	1840.82	0	5.8	17	Non	731.84	567.94	360.13	10.69	1278	>sp|P02817|AMELX_BOVIN Amelogenin, X isoform OS=Bos taurus OX=9913 GN=AMELX PE=1 SV=2	1	hf1_10472_ebo_28_1_261219.ScanId;v=1;d1=18123.18123.2	controllerType=0 controllerNumber=1 scan=18123	39.3192
24858:2	1	S.MPLPPHPGHPGYINFS[+79.966].Y		S[+80]	920.921	2	1840.84	1840.82	0	6.2	17	Non	738.41	738.41	364.13	10.69	1278	>sp|P02817|AMELX_BOVIN Amelogenin, X isoform OS=Bos taurus OX=9913 GN=AMELX PE=1 SV=2	1	hf1_10472_ebo_28_1_261219.ScanId;v=1;d1=18728.18728.2	controllerType=0 controllerNumber=1 scan=18728	40.3527
00595:3	1	S.MP[+15.995]LPPHPGHPGYINFS[+79.966].Y		P[+16], S[+80]	619.614	3	1856.83	1856.82	0	3.7	17	Non	28.22	28.22	4	0.96	1278	>sp|P02817|AMELX_BOVIN Amelogenin, X isoform OS=Bos taurus OX=9913 GN=AMELX PE=1 SV=2	1	hf1_10472_ebo_28_1_261219.ScanId;v=1;d1=2003.2003.3	controllerType=0 controllerNumber=1 scan=2003	10.4517
45573:2	1	S.MPLPPHPGHPGYINF[+15.995]S[+79.966].Y		F[+16], S[+80]	928.904	2	1856.8	1856.82	0	-9.3	17	Non	34.07	34.07	0	0.92	1278	>sp|P02817|AMELX_BOVIN Amelogenin, X isoform OS=Bos taurus OX=9913 GN=AMELX PE=1 SV=2	1	hf1_10472_ebo_28_1_261219.ScanId;v=1;d1=32621.32621.3	controllerType=0 controllerNumber=1 scan=32621	64.778
25425:3	1	S.MP[+15.995]LPPHPGHPGYINFS[+79.966].Y		P[+16], S[+80]	619.611	3	1856.82	1856.82	0	0.2	17	Non	99.43	99.43	5.8	0.92	1278	>sp|P02817|AMELX_BOVIN Amelogenin, X isoform OS=Bos taurus OX=9913 GN=AMELX PE=1 SV=2	1	hf1_10472_ebo_28_1_261219.ScanId;v=1;d1=19105.19105.3	controllerType=0 controllerNumber=1 scan=19105	41.0014
34174:2	1	S.MPLPPHPGHP[+15.995]GYINFS[+79.966].Y		P[+16], S[+80]	928.908	2	1856.81	1856.82	0	-5.2	17	Non	106.61	106.61	6.41	0.37	1278	>sp|P02817|AMELX_BOVIN Amelogenin, X isoform OS=Bos taurus OX=9913 GN=AMELX PE=1 SV=2	1	hf1_10472_ebo_28_1_261219.ScanId;v=1;d1=25047.25047.3	controllerType=0 controllerNumber=1 scan=25047	51.3197
49135:3	1	S.MP[+15.995]LPPHPGHPGYINFS[+79.966].Y		P[+16], S[+80]	619.61	3	1856.82	1856.82	0	-1.9	17	Non	128.97	128.97	5.8	0.99	1278	>sp|P02817|AMELX_BOVIN Amelogenin, X isoform OS=Bos taurus OX=9913 GN=AMELX PE=1 SV=2	1	hf1_10472_ebo_28_1_261219.ScanId;v=1;d1=35878.35878.3	controllerType=0 controllerNumber=1 scan=35878	73.5173
24775:3	1	S.MPLPPHPGHPGY[+15.995]INFS[+79.966].Y		S[+80], Y[+16]	619.608	3	1856.81	1856.82	0	-5	17	Non	173.47	173.47	0	1.05	1278	>sp|P02817|AMELX_BOVIN Amelogenin, X isoform OS=Bos taurus OX=9913 GN=AMELX PE=1 SV=2	1	hf1_10472_ebo_28_1_261219.ScanId;v=1;d1=18673.18673.3	controllerType=0 controllerNumber=1 scan=18673	40.2572
23490:3	1	S.MPLPPHPGH[+15.995]PGYINFS[+79.966].Y		H[+16], S[+80]	619.616	3	1856.83	1856.82	0	7.2	17	Non	212.6	212.6	2.63	3	1278	>sp|P02817|AMELX_BOVIN Amelogenin, X isoform OS=Bos taurus OX=9913 GN=AMELX PE=1 SV=2	1	hf1_10472_ebo_28_1_261219.ScanId;v=1;d1=17816.17816.3	controllerType=0 controllerNumber=1 scan=17816	38.7965
26441:3	1	S.MPLPPHPGHPGYIN[+0.984]FS[+79.966].Y		N[+1], S[+80]	614.611	3	1841.82	1841.81	0	6.4	17	Non	226.99	226.99	186.7	3.32	1278	>sp|P02817|AMELX_BOVIN Amelogenin, X isoform OS=Bos taurus OX=9913 GN=AMELX PE=1 SV=2	1	hf1_10472_ebo_28_1_261219.ScanId;v=1;d1=19794.19794.3	controllerType=0 controllerNumber=1 scan=19794	42.1928
22572:3	1	S.MP[+15.995]LPPHPGHPGYINFS[+79.966].Y		P[+16], S[+80]	619.61	3	1856.81	1856.82	0	-2.7	17	Non	259.5	259.5	5.8	3.41	1278	>sp|P02817|AMELX_BOVIN Amelogenin, X isoform OS=Bos taurus OX=9913 GN=AMELX PE=1 SV=2	1	hf1_10472_ebo_28_1_261219.ScanId;v=1;d1=17205.17205.3	controllerType=0 controllerNumber=1 scan=17205	37.7538
21998:3	1	S.MP[+15.995]LPPHPGHPGYINFS[+79.966].Y		P[+16], S[+80]	619.611	3	1856.82	1856.82	0	-0.6	17	Non	272.31	272.31	4	3.72	1278	>sp|P02817|AMELX_BOVIN Amelogenin, X isoform OS=Bos taurus OX=9913 GN=AMELX PE=1 SV=2	1	hf1_10472_ebo_28_1_261219.ScanId;v=1;d1=16808.16808.3	controllerType=0 controllerNumber=1 scan=16808	37.0702
21705:3	1	S.M[+15.995]PLPPHPGHPGYINFS[+79.966].Y		M[+16], S[+80]	619.612	3	1856.82	1856.82	0	1.7	17	Non	291.56	291.56	8.47	3.84	1278	>sp|P02817|AMELX_BOVIN Amelogenin, X isoform OS=Bos taurus OX=9913 GN=AMELX PE=1 SV=2	1	hf1_10472_ebo_28_1_261219.ScanId;v=1;d1=16606.16606.3	controllerType=0 controllerNumber=1 scan=16606	36.7187
26331:3	1	S.MPLPPHPGHPGYIN[+0.984]FS[+79.966].Y		N[+1], S[+80]	614.611	3	1841.82	1841.81	0	5.8	17	Non	294.56	282.74	229.98	4.71	1278	>sp|P02817|AMELX_BOVIN Amelogenin, X isoform OS=Bos taurus OX=9913 GN=AMELX PE=1 SV=2	1	hf1_10472_ebo_28_1_261219.ScanId;v=1;d1=19723.19723.3	controllerType=0 controllerNumber=1 scan=19723	42.0721
22282:3	1	S.MP[+15.995]LPPHPGHPGYINFS[+79.966].Y		P[+16], S[+80]	619.61	3	1856.82	1856.82	0	-1.3	17	Non	295.72	295.72	5.8	3.58	1278	>sp|P02817|AMELX_BOVIN Amelogenin, X isoform OS=Bos taurus OX=9913 GN=AMELX PE=1 SV=2	1	hf1_10472_ebo_28_1_261219.ScanId;v=1;d1=17002.17002.3	controllerType=0 controllerNumber=1 scan=17002	37.4066
19987:3	1	S.MP[+15.995]LPPHPGHPGYINFS[+79.966].Y		P[+16], S[+80]	619.614	3	1856.83	1856.82	0	4	17	Non	295.88	295.88	5.8	4.23	1278	>sp|P02817|AMELX_BOVIN Amelogenin, X isoform OS=Bos taurus OX=9913 GN=AMELX PE=1 SV=2	1	hf1_10472_ebo_28_1_261219.ScanId;v=1;d1=15417.15417.3	controllerType=0 controllerNumber=1 scan=15417	34.6722
23534:3	1	S.MPLPPHPGHP[+15.995]GYINFS[+79.966].Y		P[+16], S[+80]	619.616	3	1856.83	1856.82	0	7.1	17	Non	299.6	299.6	12.38	4.97	1278	>sp|P02817|AMELX_BOVIN Amelogenin, X isoform OS=Bos taurus OX=9913 GN=AMELX PE=1 SV=2	1	hf1_10472_ebo_28_1_261219.ScanId;v=1;d1=17845.17845.3	controllerType=0 controllerNumber=1 scan=17845	38.8418
00439:3	1	S.M[+15.995]PLPPHPGHPGYINFS[+79.966].Y		M[+16], S[+80]	619.606	3	1856.8	1856.82	0	-8.8	17	Non	310	310	1.2	3.25	1278	>sp|P02817|AMELX_BOVIN Amelogenin, X isoform OS=Bos taurus OX=9913 GN=AMELX PE=1 SV=2	1	hf1_10472_ebo_28_1_261219.ScanId;v=1;d1=1869.1869.3	controllerType=0 controllerNumber=1 scan=1869	10.1118
24136:3	1	S.MPLPPHP[+15.995]GHPGYINFS[+79.966].Y		P[+16], S[+80]	619.615	3	1856.83	1856.82	0	6.5	17	Non	315.1	315.1	4.67	4.74	1278	>sp|P02817|AMELX_BOVIN Amelogenin, X isoform OS=Bos taurus OX=9913 GN=AMELX PE=1 SV=2	1	hf1_10472_ebo_28_1_261219.ScanId;v=1;d1=18258.18258.3	controllerType=0 controllerNumber=1 scan=18258	39.5491
21418:3	1	S.M[+15.995]PLPPHPGHPGYINFS[+79.966].Y		M[+16], S[+80]	619.613	3	1856.83	1856.82	0	3.5	17	Non	325.37	314.76	5.44	4.53	1278	>sp|P02817|AMELX_BOVIN Amelogenin, X isoform OS=Bos taurus OX=9913 GN=AMELX PE=1 SV=2	1	hf1_10472_ebo_28_1_261219.ScanId;v=1;d1=16410.16410.3	controllerType=0 controllerNumber=1 scan=16410	36.3775
23176:3	1	S.MPLPPHPGHP[+15.995]GYINFS[+79.966].Y		P[+16], S[+80]	619.613	3	1856.82	1856.82	0	2.9	17	Non	336.92	336.92	6.79	4.47	1278	>sp|P02817|AMELX_BOVIN Amelogenin, X isoform OS=Bos taurus OX=9913 GN=AMELX PE=1 SV=2	1	hf1_10472_ebo_28_1_261219.ScanId;v=1;d1=17607.17607.3	controllerType=0 controllerNumber=1 scan=17607	38.4409
21128:3	1	S.MP[+15.995]LPPHPGHPGYINFS[+79.966].Y		P[+16], S[+80]	619.615	3	1856.83	1856.82	0	5.3	17	Non	346.08	346.08	4	5.13	1278	>sp|P02817|AMELX_BOVIN Amelogenin, X isoform OS=Bos taurus OX=9913 GN=AMELX PE=1 SV=2	1	hf1_10472_ebo_28_1_261219.ScanId;v=1;d1=16213.16213.3	controllerType=0 controllerNumber=1 scan=16213	36.0388
22588:2	1	S.M[+15.995]PLPPHPGHPGYINFS[+79.966].Y		M[+16], S[+80]	928.911	2	1856.82	1856.82	0	-1.9	17	Non	353.18	353.18	16.09	3.9	1278	>sp|P02817|AMELX_BOVIN Amelogenin, X isoform OS=Bos taurus OX=9913 GN=AMELX PE=1 SV=2	1	hf1_10472_ebo_28_1_261219.ScanId;v=1;d1=17216.17216.2	controllerType=0 controllerNumber=1 scan=17216	37.7724
20266:3	1	S.M[+15.995]PLPPHPGHPGYINFS[+79.966].Y		M[+16], S[+80]	619.614	3	1856.83	1856.82	0	4.9	17	Non	362.22	362.22	6.18	6.07	1278	>sp|P02817|AMELX_BOVIN Amelogenin, X isoform OS=Bos taurus OX=9913 GN=AMELX PE=1 SV=2	1	hf1_10472_ebo_28_1_261219.ScanId;v=1;d1=15617.15617.3	controllerType=0 controllerNumber=1 scan=15617	35.0154
20565:3	1	S.MP[+15.995]LPPHPGHPGYINFS[+79.966].Y		P[+16], S[+80]	619.614	3	1856.83	1856.82	0	4.7	17	Non	366.29	366.29	4	6.07	1278	>sp|P02817|AMELX_BOVIN Amelogenin, X isoform OS=Bos taurus OX=9913 GN=AMELX PE=1 SV=2	1	hf1_10472_ebo_28_1_261219.ScanId;v=1;d1=15817.15817.3	controllerType=0 controllerNumber=1 scan=15817	35.3592
26647:2	1	S.MPLPPHPGHPGYIN[+0.984]FS[+79.966].Y		N[+1], S[+80]	921.417	2	1841.83	1841.81	0	9.8	17	Non	366.68	327.67	225.01	4.72	1278	>sp|P02817|AMELX_BOVIN Amelogenin, X isoform OS=Bos taurus OX=9913 GN=AMELX PE=1 SV=2	1	hf1_10472_ebo_28_1_261219.ScanId;v=1;d1=19935.19935.2	controllerType=0 controllerNumber=1 scan=19935	42.4379
20851:3	1	S.MP[+15.995]LPPHPGHPGYINFS[+79.966].Y		P[+16], S[+80]	619.614	3	1856.83	1856.82	0	4.7	17	Non	395.95	395.95	4	6.12	1278	>sp|P02817|AMELX_BOVIN Amelogenin, X isoform OS=Bos taurus OX=9913 GN=AMELX PE=1 SV=2	1	hf1_10472_ebo_28_1_261219.ScanId;v=1;d1=16014.16014.3	controllerType=0 controllerNumber=1 scan=16014	35.6962
26048:3	1	S.MPLPPHPGHPGYIN[+0.984]FS[+79.966].Y		N[+1], S[+80]	614.611	3	1841.82	1841.81	0	5.6	17	Non	467.81	407.3	364.11	6.14	1278	>sp|P02817|AMELX_BOVIN Amelogenin, X isoform OS=Bos taurus OX=9913 GN=AMELX PE=1 SV=2	1	hf1_10472_ebo_28_1_261219.ScanId;v=1;d1=19525.19525.3	controllerType=0 controllerNumber=1 scan=19525	41.7317
25757:3	1	S.MPLPPHPGHPGYIN[+0.984]FS[+79.966].Y		N[+1], S[+80]	614.612	3	1841.82	1841.81	0	7.7	17	Non	489.12	366.87	317.4	7.1	1278	>sp|P02817|AMELX_BOVIN Amelogenin, X isoform OS=Bos taurus OX=9913 GN=AMELX PE=1 SV=2	1	hf1_10472_ebo_28_1_261219.ScanId;v=1;d1=19327.19327.3	controllerType=0 controllerNumber=1 scan=19327	41.3896
22300:2	1	S.M[+15.995]PLPPHPGHPGYINFS[+79.966].Y		M[+16], S[+80]	928.911	2	1856.81	1856.82	0	-2.4	17	Non	527.98	527.98	16.42	5.27	1278	>sp|P02817|AMELX_BOVIN Amelogenin, X isoform OS=Bos taurus OX=9913 GN=AMELX PE=1 SV=2	1	hf1_10472_ebo_28_1_261219.ScanId;v=1;d1=17014.17014.2	controllerType=0 controllerNumber=1 scan=17014	37.4267
22014:2	1	S.M[+15.995]PLPPHPGHPGYINFS[+79.966].Y		M[+16], S[+80]	928.911	2	1856.81	1856.82	0	-2.6	17	Non	533.13	533.13	22.46	5.89	1278	>sp|P02817|AMELX_BOVIN Amelogenin, X isoform OS=Bos taurus OX=9913 GN=AMELX PE=1 SV=2	1	hf1_10472_ebo_28_1_261219.ScanId;v=1;d1=16819.16819.2	controllerType=0 controllerNumber=1 scan=16819	37.0883
26349:2	1	S.MPLPPHPGHPGYIN[+0.984]FS[+79.966].Y		N[+1], S[+80]	921.414	2	1841.82	1841.81	0	6.9	17	Non	547.06	486.28	334.62	6.53	1278	>sp|P02817|AMELX_BOVIN Amelogenin, X isoform OS=Bos taurus OX=9913 GN=AMELX PE=1 SV=2	1	hf1_10472_ebo_28_1_261219.ScanId;v=1;d1=19735.19735.2	controllerType=0 controllerNumber=1 scan=19735	42.093
25157:2	1	S.MPLPPHPGHPGYIN[+0.984]FS[+79.966].Y		N[+1], S[+80]	921.415	2	1841.82	1841.81	0	7.7	17	Non	571.64	571.64	274.87	7.32	1278	>sp|P02817|AMELX_BOVIN Amelogenin, X isoform OS=Bos taurus OX=9913 GN=AMELX PE=1 SV=2	1	hf1_10472_ebo_28_1_261219.ScanId;v=1;d1=18927.18927.2	controllerType=0 controllerNumber=1 scan=18927	40.6949
26050:2	1	S.MPLPPHPGHPGYIN[+0.984]FS[+79.966].Y		N[+1], S[+80]	921.413	2	1841.82	1841.81	0	5.4	17	Non	572.93	461.68	297.44	7.69	1278	>sp|P02817|AMELX_BOVIN Amelogenin, X isoform OS=Bos taurus OX=9913 GN=AMELX PE=1 SV=2	1	hf1_10472_ebo_28_1_261219.ScanId;v=1;d1=19526.19526.2	controllerType=0 controllerNumber=1 scan=19526	41.7332
21723:2	1	S.M[+15.995]PLPPHPGHPGYINFS[+79.966].Y		M[+16], S[+80]	928.912	2	1856.82	1856.82	0	-0.8	17	Non	576.02	576.02	25.95	6.15	1278	>sp|P02817|AMELX_BOVIN Amelogenin, X isoform OS=Bos taurus OX=9913 GN=AMELX PE=1 SV=2	1	hf1_10472_ebo_28_1_261219.ScanId;v=1;d1=16617.16617.2	controllerType=0 controllerNumber=1 scan=16617	36.7379
21143:2	1	S.M[+15.995]PLPPHPGHPGYINFS[+79.966].Y		M[+16], S[+80]	928.92	2	1856.83	1856.82	0	7.1	17	Non	602.95	602.95	21.09	8.95	1278	>sp|P02817|AMELX_BOVIN Amelogenin, X isoform OS=Bos taurus OX=9913 GN=AMELX PE=1 SV=2	1	hf1_10472_ebo_28_1_261219.ScanId;v=1;d1=16224.16224.2	controllerType=0 controllerNumber=1 scan=16224	36.0581
20579:2	1	S.M[+15.995]PLPPHPGHPGYINFS[+79.966].Y		M[+16], S[+80]	928.919	2	1856.83	1856.82	0	6.1	17	Non	609.28	609.28	29.5	8.69	1278	>sp|P02817|AMELX_BOVIN Amelogenin, X isoform OS=Bos taurus OX=9913 GN=AMELX PE=1 SV=2	1	hf1_10472_ebo_28_1_261219.ScanId;v=1;d1=15828.15828.2	controllerType=0 controllerNumber=1 scan=15828	35.3785
20868:2	1	S.M[+15.995]PLPPHPGHPGYINFS[+79.966].Y		M[+16], S[+80]	928.918	2	1856.83	1856.82	0	5.6	17	Non	611.07	611.07	39.32	8.69	1278	>sp|P02817|AMELX_BOVIN Amelogenin, X isoform OS=Bos taurus OX=9913 GN=AMELX PE=1 SV=2	1	hf1_10472_ebo_28_1_261219.ScanId;v=1;d1=16025.16025.2	controllerType=0 controllerNumber=1 scan=16025	35.7155
20284:2	1	S.M[+15.995]PLPPHPGHPGYINFS[+79.966].Y		M[+16], S[+80]	928.919	2	1856.83	1856.82	0	6.4	17	Non	619.27	619.27	38.78	8.95	1278	>sp|P02817|AMELX_BOVIN Amelogenin, X isoform OS=Bos taurus OX=9913 GN=AMELX PE=1 SV=2	1	hf1_10472_ebo_28_1_261219.ScanId;v=1;d1=15628.15628.2	controllerType=0 controllerNumber=1 scan=15628	35.0341
21432:2	1	S.M[+15.995]PLPPHPGHPGYINFS[+79.966].Y		M[+16], S[+80]	928.918	2	1856.83	1856.82	0	5.7	17	Non	620.57	620.57	24.03	8.69	1278	>sp|P02817|AMELX_BOVIN Amelogenin, X isoform OS=Bos taurus OX=9913 GN=AMELX PE=1 SV=2	1	hf1_10472_ebo_28_1_261219.ScanId;v=1;d1=16421.16421.2	controllerType=0 controllerNumber=1 scan=16421	36.3969
25760:2	1	S.MPLPPHPGHPGYIN[+0.984]FS[+79.966].Y		N[+1], S[+80]	921.414	2	1841.82	1841.81	0	6.4	17	Non	646.61	646.61	373.32	8.95	1278	>sp|P02817|AMELX_BOVIN Amelogenin, X isoform OS=Bos taurus OX=9913 GN=AMELX PE=1 SV=2	1	hf1_10472_ebo_28_1_261219.ScanId;v=1;d1=19329.19329.2	controllerType=0 controllerNumber=1 scan=19329	41.3919
25465:2	1	S.MPLPPHPGHPGYIN[+0.984]FS[+79.966].Y		N[+1], S[+80]	921.415	2	1841.82	1841.81	0	7.6	17	Non	674.39	519.28	332.48	9.95	1278	>sp|P02817|AMELX_BOVIN Amelogenin, X isoform OS=Bos taurus OX=9913 GN=AMELX PE=1 SV=2	1	hf1_10472_ebo_28_1_261219.ScanId;v=1;d1=19130.19130.2	controllerType=0 controllerNumber=1 scan=19130	41.0466
21783:3	1	S.M[+15.995]PLPPHPGHPGYIN[+0.984]FS[+79.966].Y		M[+16], N[+1], S[+80]	619.944	3	1857.82	1857.8	0	7.6	17	Non	2.93	2.93	2.93	0.79	1278	>sp|P02817|AMELX_BOVIN Amelogenin, X isoform OS=Bos taurus OX=9913 GN=AMELX PE=1 SV=2	1	hf1_10472_ebo_28_1_261219.ScanId;v=1;d1=16658.16658.2	controllerType=0 controllerNumber=1 scan=16658	36.8089
20371:3	1	S.MP[+15.995]LPPH[+15.995]PGHPGYINFS[+79.966].Y		H[+16], P[+16], S[+80]	624.947	3	1872.83	1872.81	0	6.4	17	Non	19.51	19.51	0	0.79	1278	>sp|P02817|AMELX_BOVIN Amelogenin, X isoform OS=Bos taurus OX=9913 GN=AMELX PE=1 SV=2	1	hf1_10472_ebo_28_1_261219.ScanId;v=1;d1=15686.15686.2	controllerType=0 controllerNumber=1 scan=15686	35.1314
49136:3	1	S.MP[+15.995]LPPHPGHPGYIN[+0.984]FS[+79.966].Y		N[+1], P[+16], S[+80]	619.943	3	1857.81	1857.8	0	5.7	17	Non	84.92	84.92	5.8	0.92	1278	>sp|P02817|AMELX_BOVIN Amelogenin, X isoform OS=Bos taurus OX=9913 GN=AMELX PE=1 SV=2	1	hf1_10472_ebo_28_1_261219.ScanId;v=1;d1=35878.35878.3	controllerType=0 controllerNumber=1 scan=35878	73.5173
25072:3	1	S.MPLPPHP[+15.995]GHPGYIN[+0.984]FS[+79.966].Y		N[+1], P[+16], S[+80]	619.941	3	1857.81	1857.8	0	3.6	17	Non	156.83	156.83	0	1.51	1278	>sp|P02817|AMELX_BOVIN Amelogenin, X isoform OS=Bos taurus OX=9913 GN=AMELX PE=1 SV=2	1	hf1_10472_ebo_28_1_261219.ScanId;v=1;d1=18872.18872.3	controllerType=0 controllerNumber=1 scan=18872	40.6005
21551:3	1	S.MP[+15.995]LP[+15.995]PHPGHPGYINFS[+79.966].Y		P[+16]*2, S[+80]	624.946	3	1872.82	1872.81	0	4.4	17	Non	171.9	171.9	5.8	2.26	1278	>sp|P02817|AMELX_BOVIN Amelogenin, X isoform OS=Bos taurus OX=9913 GN=AMELX PE=1 SV=2	1	hf1_10472_ebo_28_1_261219.ScanId;v=1;d1=16505.16505.3	controllerType=0 controllerNumber=1 scan=16505	36.5417
19988:3	1	S.MP[+15.995]LPPHPGHPGYIN[+0.984]FS[+79.966].Y		N[+1], P[+16], S[+80]	619.945	3	1857.82	1857.8	0	9.8	17	Non	240.14	240.14	2.68	3.67	1278	>sp|P02817|AMELX_BOVIN Amelogenin, X isoform OS=Bos taurus OX=9913 GN=AMELX PE=1 SV=2	1	hf1_10472_ebo_28_1_261219.ScanId;v=1;d1=15417.15417.3	controllerType=0 controllerNumber=1 scan=15417	34.6722
19957:3	1	S.M[+15.995]PLPPHPGHP[+15.995]GYINFS[+79.966].Y		M[+16], P[+16], S[+80]	624.947	3	1872.83	1872.81	0	7.3	17	Non	240.72	240.72	3.97	4.37	1278	>sp|P02817|AMELX_BOVIN Amelogenin, X isoform OS=Bos taurus OX=9913 GN=AMELX PE=1 SV=2	1	hf1_10472_ebo_28_1_261219.ScanId;v=1;d1=15397.15397.3	controllerType=0 controllerNumber=1 scan=15397	34.6397
21257:3	1	S.MP[+15.995]LPPHPGHP[+15.995]GYINFS[+79.966].Y		P[+16]*2, S[+80]	624.948	3	1872.83	1872.81	0	8.6	17	Non	273.21	273.21	0	3.95	1278	>sp|P02817|AMELX_BOVIN Amelogenin, X isoform OS=Bos taurus OX=9913 GN=AMELX PE=1 SV=2	1	hf1_10472_ebo_28_1_261219.ScanId;v=1;d1=16303.16303.3	controllerType=0 controllerNumber=1 scan=16303	36.1935
20963:3	1	S.MP[+15.995]LPPHPGHP[+15.995]GYINFS[+79.966].Y		P[+16]*2, S[+80]	624.94	3	1872.8	1872.81	0	-5	17	Non	276.92	276.92	0	3.04	1278	>sp|P02817|AMELX_BOVIN Amelogenin, X isoform OS=Bos taurus OX=9913 GN=AMELX PE=1 SV=2	1	hf1_10472_ebo_28_1_261219.ScanId;v=1;d1=16095.16095.3	controllerType=0 controllerNumber=1 scan=16095	35.8354
23699:2	1	S.MP[+15.995]LPPHPGHPGYIN[+0.984]FS[+79.966].Y		N[+1], P[+16], S[+80]	929.414	2	1857.82	1857.8	0	9.3	17	Non	281.5	280.46	0.13	3.9	1278	>sp|P02817|AMELX_BOVIN Amelogenin, X isoform OS=Bos taurus OX=9913 GN=AMELX PE=1 SV=2	1	hf1_10472_ebo_28_1_261219.ScanId;v=1;d1=17955.17955.2	controllerType=0 controllerNumber=1 scan=17955	39.0319
24157:2	1	S.MPLPPHPGHPGY[+15.995]IN[+0.984]FS[+79.966].Y		N[+1], S[+80], Y[+16]	929.412	2	1857.82	1857.8	0	7.6	17	Non	287.96	269.55	0	3.42	1278	>sp|P02817|AMELX_BOVIN Amelogenin, X isoform OS=Bos taurus OX=9913 GN=AMELX PE=1 SV=2	1	hf1_10472_ebo_28_1_261219.ScanId;v=1;d1=18272.18272.3	controllerType=0 controllerNumber=1 scan=18272	39.5721
20240:3	1	S.M[+15.995]PLPPHPGHP[+15.995]GYINFS[+79.966].Y		M[+16], P[+16], S[+80]	624.946	3	1872.82	1872.81	0	5.8	17	Non	300.91	300.91	2.49	4.71	1278	>sp|P02817|AMELX_BOVIN Amelogenin, X isoform OS=Bos taurus OX=9913 GN=AMELX PE=1 SV=2	1	hf1_10472_ebo_28_1_261219.ScanId;v=1;d1=15596.15596.3	controllerType=0 controllerNumber=1 scan=15596	34.9808
19466:3	1	S.M[+15.995]PLPPHPGHP[+15.995]GYINFS[+79.966].Y		M[+16], P[+16], S[+80]	624.947	3	1872.83	1872.81	0	6.9	17	Non	355.15	355.15	5.37	5.21	1278	>sp|P02817|AMELX_BOVIN Amelogenin, X isoform OS=Bos taurus OX=9913 GN=AMELX PE=1 SV=2	1	hf1_10472_ebo_28_1_261219.ScanId;v=1;d1=15058.15058.3	controllerType=0 controllerNumber=1 scan=15058	34.0626
24455:3	1	S.MPLPPHPGH[+15.995]PGYIN[+0.984]FS[+79.966].Y		H[+16], N[+1], S[+80]	619.941	3	1857.81	1857.8	0	3.1	17	Non	366.68	331.31	2.2	4.79	1278	>sp|P02817|AMELX_BOVIN Amelogenin, X isoform OS=Bos taurus OX=9913 GN=AMELX PE=1 SV=2	1	hf1_10472_ebo_28_1_261219.ScanId;v=1;d1=18465.18465.3	controllerType=0 controllerNumber=1 scan=18465	39.9004
22573:3	1	S.MP[+15.995]LPPHPGHPGYIN[+0.984]FS[+79.966].Y		N[+1], P[+16], S[+80]	619.943	3	1857.81	1857.8	0	5.9	17	Non	379	369.62	5.65	6.07	1278	>sp|P02817|AMELX_BOVIN Amelogenin, X isoform OS=Bos taurus OX=9913 GN=AMELX PE=1 SV=2	1	hf1_10472_ebo_28_1_261219.ScanId;v=1;d1=17205.17205.3	controllerType=0 controllerNumber=1 scan=17205	37.7538
22878:3	1	S.M[+15.995]PLPPHPGHPGYIN[+0.984]FS[+79.966].Y		M[+16], N[+1], S[+80]	619.944	3	1857.82	1857.8	0	7.2	17	Non	395.71	395.71	3.38	6.33	1278	>sp|P02817|AMELX_BOVIN Amelogenin, X isoform OS=Bos taurus OX=9913 GN=AMELX PE=1 SV=2	1	hf1_10472_ebo_28_1_261219.ScanId;v=1;d1=17404.17404.3	controllerType=0 controllerNumber=1 scan=17404	38.0958
19528:2	1	S.M[+15.995]PLPPHPGHP[+15.995]GYINFS[+79.966].Y		M[+16], P[+16], S[+80]	936.919	2	1872.83	1872.81	0	8.8	17	Non	416.71	416.71	19.89	5.43	1278	>sp|P02817|AMELX_BOVIN Amelogenin, X isoform OS=Bos taurus OX=9913 GN=AMELX PE=1 SV=2	1	hf1_10472_ebo_28_1_261219.ScanId;v=1;d1=15101.15101.2	controllerType=0 controllerNumber=1 scan=15101	34.1373
23075:2	1	S.M[+15.995]PLPPHPGHPGYIN[+0.984]FS[+79.966].Y		M[+16], N[+1], S[+80]	929.413	2	1857.82	1857.8	0	8.3	17	Non	418.05	388.67	20.09	5.61	1278	>sp|P02817|AMELX_BOVIN Amelogenin, X isoform OS=Bos taurus OX=9913 GN=AMELX PE=1 SV=2	1	hf1_10472_ebo_28_1_261219.ScanId;v=1;d1=17536.17536.2	controllerType=0 controllerNumber=1 scan=17536	38.323
22589:2	1	S.M[+15.995]PLPPHPGHPGYIN[+0.984]FS[+79.966].Y		M[+16], N[+1], S[+80]	929.412	2	1857.82	1857.8	0	6.9	17	Non	500.92	440.46	34.83	6.42	1278	>sp|P02817|AMELX_BOVIN Amelogenin, X isoform OS=Bos taurus OX=9913 GN=AMELX PE=1 SV=2	1	hf1_10472_ebo_28_1_261219.ScanId;v=1;d1=17216.17216.2	controllerType=0 controllerNumber=1 scan=17216	37.7724
22015:2	1	S.M[+15.995]PLPPHPGHPGYIN[+0.984]FS[+79.966].Y		M[+16], N[+1], S[+80]	929.411	2	1857.81	1857.8	0	6.2	17	Non	583.45	533.61	35.17	7.69	1278	>sp|P02817|AMELX_BOVIN Amelogenin, X isoform OS=Bos taurus OX=9913 GN=AMELX PE=1 SV=2	1	hf1_10472_ebo_28_1_261219.ScanId;v=1;d1=16819.16819.2	controllerType=0 controllerNumber=1 scan=16819	37.0883
25154:3	1	S.MPLPPHPGHP[+15.995]GY[+31.990]IN[+0.984]F[+31.990]S.Y		F[+32], N[+1], P[+16], Y[+32]	614.614	3	1841.83	1841.82	0	6.4	17	Non	114.92	114.92	0	2.16	1278	>sp|P02817|AMELX_BOVIN Amelogenin, X isoform OS=Bos taurus OX=9913 GN=AMELX PE=1 SV=2	1	hf1_10472_ebo_28_1_261219.ScanId;v=1;d1=18924.18924.3	controllerType=0 controllerNumber=1 scan=18924	40.6882
25463:3	1	S.MPLPPHPGHP[+31.990]GY[+15.995]IN[+0.984]F[+31.990]S.Y		F[+32], N[+1], P[+32], Y[+16]	614.614	3	1841.83	1841.82	0	5.7	17	Non	158.38	91.38	3.21	1.22	1278	>sp|P02817|AMELX_BOVIN Amelogenin, X isoform OS=Bos taurus OX=9913 GN=AMELX PE=1 SV=2	1	hf1_10472_ebo_28_1_261219.ScanId;v=1;d1=19129.19129.3	controllerType=0 controllerNumber=1 scan=19129	41.0455
26928:2	1	S.MPLPPHPGHPGYINFS[+79.966]Y.E		S[+80]	1002.45	2	2003.9	2003.89	0	7	17	Non	192.66	192.66	92.11	2.32	1278	>sp|P02817|AMELX_BOVIN Amelogenin, X isoform OS=Bos taurus OX=9913 GN=AMELX PE=1 SV=2	1	hf1_10472_ebo_28_1_261219.ScanId;v=1;d1=20133.20133.5	controllerType=0 controllerNumber=1 scan=20133	42.7804
26874:2	1	S.MPLPPHPGHPGYINFS[+79.966]Y.E		S[+80]	1002.45	2	2003.9	2003.89	0	7.3	17	Non	230.08	168.51	156.29	3.11	1278	>sp|P02817|AMELX_BOVIN Amelogenin, X isoform OS=Bos taurus OX=9913 GN=AMELX PE=1 SV=2	1	hf1_10472_ebo_28_1_261219.ScanId;v=1;d1=20093.20093.2	controllerType=0 controllerNumber=1 scan=20093	42.7103
26749:3	1	S.MPLPPHPGHPGYINFS[+79.966]Y.E		S[+80]	668.639	3	2003.9	2003.89	0	6.7	17	Non	282.87	282.87	157.84	4.74	1278	>sp|P02817|AMELX_BOVIN Amelogenin, X isoform OS=Bos taurus OX=9913 GN=AMELX PE=1 SV=2	1	hf1_10472_ebo_28_1_261219.ScanId;v=1;d1=20005.20005.3	controllerType=0 controllerNumber=1 scan=20005	42.5583
27376:3	1	S.MPLPPHPGHPGYINFS[+79.966]Y.E		S[+80]	668.638	3	2003.9	2003.89	0	5.8	17	Non	348.42	241.25	230.84	4.41	1278	>sp|P02817|AMELX_BOVIN Amelogenin, X isoform OS=Bos taurus OX=9913 GN=AMELX PE=1 SV=2	1	hf1_10472_ebo_28_1_261219.ScanId;v=1;d1=20431.20431.3	controllerType=0 controllerNumber=1 scan=20431	43.2948
27044:3	1	S.MPLPPHPGHPGYINFS[+79.966]Y.E		S[+80]	668.639	3	2003.9	2003.89	0	7.6	17	Non	439.45	268.97	268.97	5.25	1278	>sp|P02817|AMELX_BOVIN Amelogenin, X isoform OS=Bos taurus OX=9913 GN=AMELX PE=1 SV=2	1	hf1_10472_ebo_28_1_261219.ScanId;v=1;d1=20208.20208.3	controllerType=0 controllerNumber=1 scan=20208	42.9109
24811:2	1	S.MP[+15.995]LPPHPGHPGYINFS[+79.966]Y.E		P[+16], S[+80]	1010.45	2	2019.9	2019.88	0	8.5	17	Non	93.97	93.97	4	2.17	1278	>sp|P02817|AMELX_BOVIN Amelogenin, X isoform OS=Bos taurus OX=9913 GN=AMELX PE=1 SV=2	1	hf1_10472_ebo_28_1_261219.ScanId;v=1;d1=18699.18699.2	controllerType=0 controllerNumber=1 scan=18699	40.3012
23783:3	1	S.MP[+15.995]LPPHPGHPGYINFS[+79.966]Y.E		P[+16], S[+80]	673.971	3	2019.9	2019.88	0	7.2	17	Non	139.35	23.07	5.8	1.08	1278	>sp|P02817|AMELX_BOVIN Amelogenin, X isoform OS=Bos taurus OX=9913 GN=AMELX PE=1 SV=2	1	hf1_10472_ebo_28_1_261219.ScanId;v=1;d1=18015.18015.3	controllerType=0 controllerNumber=1 scan=18015	39.1363
24802:3	1	S.MP[+15.995]LPPHPGHPGYINFS[+79.966]Y.E		P[+16], S[+80]	673.971	3	2019.9	2019.88	0	7.5	17	Non	173.05	118.36	5.8	2.26	1278	>sp|P02817|AMELX_BOVIN Amelogenin, X isoform OS=Bos taurus OX=9913 GN=AMELX PE=1 SV=2	1	hf1_10472_ebo_28_1_261219.ScanId;v=1;d1=18690.18690.3	controllerType=0 controllerNumber=1 scan=18690	40.2856
20700:3	1	S.MP[+15.995]LPPHPGHPGYINFSY[+15.995].E		P[+16], Y[+16]	652.641	3	1955.91	1955.91	0	-1.3	17	Non	191.13	150.34	0.74	2.16	1278	>sp|P02817|AMELX_BOVIN Amelogenin, X isoform OS=Bos taurus OX=9913 GN=AMELX PE=1 SV=2	1	hf1_10472_ebo_28_1_261219.ScanId;v=1;d1=15914.15914.3	controllerType=0 controllerNumber=1 scan=15914	35.5231
23844:3	1	S.M[+15.995]PLPPHPGHPGYINFS[+79.966]Y.E		M[+16], S[+80]	673.971	3	2019.9	2019.88	0	7.4	17	Non	223.5	86.06	2.03	2.26	1278	>sp|P02817|AMELX_BOVIN Amelogenin, X isoform OS=Bos taurus OX=9913 GN=AMELX PE=1 SV=2	1	hf1_10472_ebo_28_1_261219.ScanId;v=1;d1=18055.18055.3	controllerType=0 controllerNumber=1 scan=18055	39.2018
24453:3	1	S.MP[+15.995]LPPHPGHPGYINFS[+79.966]Y.E		P[+16], S[+80]	673.969	3	2019.89	2019.88	0	5.4	17	Non	267.53	150.58	1.54	3.27	1278	>sp|P02817|AMELX_BOVIN Amelogenin, X isoform OS=Bos taurus OX=9913 GN=AMELX PE=1 SV=2	1	hf1_10472_ebo_28_1_261219.ScanId;v=1;d1=18464.18464.3	controllerType=0 controllerNumber=1 scan=18464	39.8992
24110:2	1	S.M[+15.995]PLPPHPGHPGYINFS[+79.966]Y.E		M[+16], S[+80]	1010.45	2	2019.9	2019.88	0	6.4	17	Non	300.56	300.56	0.62	4.85	1278	>sp|P02817|AMELX_BOVIN Amelogenin, X isoform OS=Bos taurus OX=9913 GN=AMELX PE=1 SV=2	1	hf1_10472_ebo_28_1_261219.ScanId;v=1;d1=18239.18239.2	controllerType=0 controllerNumber=1 scan=18239	39.5151
24131:3	1	S.M[+15.995]PLPPHPGHPGYINFS[+79.966]Y.E		M[+16], S[+80]	673.969	3	2019.89	2019.88	0	5.7	17	Non	320.77	186.07	4.8	4.41	1278	>sp|P02817|AMELX_BOVIN Amelogenin, X isoform OS=Bos taurus OX=9913 GN=AMELX PE=1 SV=2	1	hf1_10472_ebo_28_1_261219.ScanId;v=1;d1=18255.18255.3	controllerType=0 controllerNumber=1 scan=18255	39.5448
21018:3	1	S.MP[+15.995]LPPHPGHPGYINFSYE.V		P[+16]	690.328	3	2068.97	2068.96	0	5.9	17	Non	116.57	109.55	5.8	1.22	1278	>sp|P02817|AMELX_BOVIN Amelogenin, X isoform OS=Bos taurus OX=9913 GN=AMELX PE=1 SV=2	1	hf1_10472_ebo_28_1_261219.ScanId;v=1;d1=16134.16134.2	controllerType=0 controllerNumber=1 scan=16134	35.9004
21089:3	1	S.MP[+15.995]LPPHPGHPGYINFSYE.V		P[+16]	690.328	3	2068.97	2068.96	0	6	17	Non	176.42	176.42	5.8	2.26	1278	>sp|P02817|AMELX_BOVIN Amelogenin, X isoform OS=Bos taurus OX=9913 GN=AMELX PE=1 SV=2	1	hf1_10472_ebo_28_1_261219.ScanId;v=1;d1=16183.16183.3	controllerType=0 controllerNumber=1 scan=16183	35.987
26948:3	1	S.MPLPPHPGHPGYINFS[+79.966]YE.V		S[+80]	711.646	3	2132.93	2132.93	0	-2.3	17	Non	233.9	233.9	131.65	2.39	1278	>sp|P02817|AMELX_BOVIN Amelogenin, X isoform OS=Bos taurus OX=9913 GN=AMELX PE=1 SV=2	1	hf1_10472_ebo_28_1_261219.ScanId;v=1;d1=20146.20146.3	controllerType=0 controllerNumber=1 scan=20146	42.8018
26385:2	1	S.MPLPPHPGHPGYINFS[+79.966]YE.V		S[+80]	1066.98	2	2132.95	2132.93	0	8.1	17	Non	378.01	378.01	257.84	6.96	1278	>sp|P02817|AMELX_BOVIN Amelogenin, X isoform OS=Bos taurus OX=9913 GN=AMELX PE=1 SV=2	1	hf1_10472_ebo_28_1_261219.ScanId;v=1;d1=19758.19758.2	controllerType=0 controllerNumber=1 scan=19758	42.1321
26677:2	1	S.MPLPPHPGHPGYINFS[+79.966]YE.V		S[+80]	1066.97	2	2132.94	2132.93	0	5	17	Non	380.95	380.95	240.44	6.08	1278	>sp|P02817|AMELX_BOVIN Amelogenin, X isoform OS=Bos taurus OX=9913 GN=AMELX PE=1 SV=2	1	hf1_10472_ebo_28_1_261219.ScanId;v=1;d1=19956.19956.2	controllerType=0 controllerNumber=1 scan=19956	42.4745
25662:3	1	S.MPLPPHPGHPGYINFS[+79.966]YE.V		S[+80]	711.653	3	2132.94	2132.93	0	6.2	17	Non	384.96	384.96	257.82	5.89	1278	>sp|P02817|AMELX_BOVIN Amelogenin, X isoform OS=Bos taurus OX=9913 GN=AMELX PE=1 SV=2	1	hf1_10472_ebo_28_1_261219.ScanId;v=1;d1=19265.19265.3	controllerType=0 controllerNumber=1 scan=19265	41.2802
25976:3	1	S.MPLPPHPGHPGYINFS[+79.966]YE.V		S[+80]	711.653	3	2132.94	2132.93	0	6.2	17	Non	486.07	486.07	327.32	6.22	1278	>sp|P02817|AMELX_BOVIN Amelogenin, X isoform OS=Bos taurus OX=9913 GN=AMELX PE=1 SV=2	1	hf1_10472_ebo_28_1_261219.ScanId;v=1;d1=19472.19472.3	controllerType=0 controllerNumber=1 scan=19472	41.6397
25713:2	1	S.MPLPPHPGHPGYINFS[+79.966]YE.V		S[+80]	1066.98	2	2132.95	2132.93	0	8.2	17	Non	508.36	508.36	317.59	7.05	1278	>sp|P02817|AMELX_BOVIN Amelogenin, X isoform OS=Bos taurus OX=9913 GN=AMELX PE=1 SV=2	1	hf1_10472_ebo_28_1_261219.ScanId;v=1;d1=19298.19298.2	controllerType=0 controllerNumber=1 scan=19298	41.3377
26029:2	1	S.MPLPPHPGHPGYINFS[+79.966]YE.V		S[+80]	1066.98	2	2132.95	2132.93	0	7.6	17	Non	509.36	509.36	316.95	7.05	1278	>sp|P02817|AMELX_BOVIN Amelogenin, X isoform OS=Bos taurus OX=9913 GN=AMELX PE=1 SV=2	1	hf1_10472_ebo_28_1_261219.ScanId;v=1;d1=19510.19510.2	controllerType=0 controllerNumber=1 scan=19510	41.7045
22634:2	1	S.M[+15.995]PLPPHPGHPGYINFS[+79.966]YE.V		M[+16], S[+80]	1074.97	2	2148.94	2148.92	0	5	17	Non	18.71	18.71	5.4	0.38	1278	>sp|P02817|AMELX_BOVIN Amelogenin, X isoform OS=Bos taurus OX=9913 GN=AMELX PE=1 SV=2	1	hf1_10472_ebo_28_1_261219.ScanId;v=1;d1=17245.17245.3	controllerType=0 controllerNumber=1 scan=17245	37.821
25325:3	1	S.MPLPPHP[+15.995]GHPGYINFS[+79.966]YE.V		P[+16], S[+80]	716.984	3	2148.94	2148.92	0	5.6	17	Non	42.51	42.51	0	1.02	1278	>sp|P02817|AMELX_BOVIN Amelogenin, X isoform OS=Bos taurus OX=9913 GN=AMELX PE=1 SV=2	1	hf1_10472_ebo_28_1_261219.ScanId;v=1;d1=19039.19039.4	controllerType=0 controllerNumber=1 scan=19039	40.8862
25439:3	1	S.MPLP[+15.995]PHPGHPGYINFS[+79.966]YE.V		P[+16], S[+80]	716.985	3	2148.94	2148.92	0	6.5	17	Non	64.79	64.79	0	0.81	1278	>sp|P02817|AMELX_BOVIN Amelogenin, X isoform OS=Bos taurus OX=9913 GN=AMELX PE=1 SV=2	1	hf1_10472_ebo_28_1_261219.ScanId;v=1;d1=19115.19115.3	controllerType=0 controllerNumber=1 scan=19115	41.0189
24966:3	1	S.MPLPPHP[+15.995]GHPGYINFS[+79.966]YE.V		P[+16], S[+80]	716.986	3	2148.94	2148.92	0	8.3	17	Non	84.4	84.4	0	0.96	1278	>sp|P02817|AMELX_BOVIN Amelogenin, X isoform OS=Bos taurus OX=9913 GN=AMELX PE=1 SV=2	1	hf1_10472_ebo_28_1_261219.ScanId;v=1;d1=18800.18800.3	controllerType=0 controllerNumber=1 scan=18800	40.4745
26949:3	1	S.MPLPPHPGHPGYIN[+0.984]FS[+79.966]YE.V		N[+1], S[+80]	711.982	3	2133.93	2133.91	0	8.1	17	Non	125.53	125.53	47.56	2.19	1278	>sp|P02817|AMELX_BOVIN Amelogenin, X isoform OS=Bos taurus OX=9913 GN=AMELX PE=1 SV=2	1	hf1_10472_ebo_28_1_261219.ScanId;v=1;d1=20146.20146.3	controllerType=0 controllerNumber=1 scan=20146	42.8018
24526:3	1	S.MP[+15.995]LPPHPGHPGYINFS[+79.966]YE.V		P[+16], S[+80]	716.98	3	2148.92	2148.92	0	-0.2	17	Non	208.59	208.59	5.8	2.29	1278	>sp|P02817|AMELX_BOVIN Amelogenin, X isoform OS=Bos taurus OX=9913 GN=AMELX PE=1 SV=2	1	hf1_10472_ebo_28_1_261219.ScanId;v=1;d1=18509.18509.3	controllerType=0 controllerNumber=1 scan=18509	39.9753
24204:3	1	S.M[+15.995]PLPPHPGHPGYINFS[+79.966]YE.V		M[+16], S[+80]	716.982	3	2148.93	2148.92	0	3.7	17	Non	331.31	331.31	17.82	4.7	1278	>sp|P02817|AMELX_BOVIN Amelogenin, X isoform OS=Bos taurus OX=9913 GN=AMELX PE=1 SV=2	1	hf1_10472_ebo_28_1_261219.ScanId;v=1;d1=18300.18300.3	controllerType=0 controllerNumber=1 scan=18300	39.6191
23899:3	1	S.M[+15.995]PLPPHPGHPGYINFS[+79.966]YE.V		M[+16], S[+80]	716.979	3	2148.92	2148.92	0	-0.6	17	Non	391.21	391.21	14.85	5.16	1278	>sp|P02817|AMELX_BOVIN Amelogenin, X isoform OS=Bos taurus OX=9913 GN=AMELX PE=1 SV=2	1	hf1_10472_ebo_28_1_261219.ScanId;v=1;d1=18090.18090.3	controllerType=0 controllerNumber=1 scan=18090	39.2638
22721:2	1	S.M[+15.995]PLPPHPGHPGYINFS[+79.966]YE.V		M[+16], S[+80]	1074.98	2	2148.95	2148.92	0	9.8	17	Non	414.9	414.9	19.48	5.66	1278	>sp|P02817|AMELX_BOVIN Amelogenin, X isoform OS=Bos taurus OX=9913 GN=AMELX PE=1 SV=2	1	hf1_10472_ebo_28_1_261219.ScanId;v=1;d1=17302.17302.2	controllerType=0 controllerNumber=1 scan=17302	37.9184
23646:2	1	S.M[+15.995]PLPPHPGHPGYINFS[+79.966]YE.V		M[+16], S[+80]	1074.97	2	2148.94	2148.92	0	8.1	17	Non	416.48	416.48	30.48	6.31	1278	>sp|P02817|AMELX_BOVIN Amelogenin, X isoform OS=Bos taurus OX=9913 GN=AMELX PE=1 SV=2	1	hf1_10472_ebo_28_1_261219.ScanId;v=1;d1=17921.17921.2	controllerType=0 controllerNumber=1 scan=17921	38.973
23587:3	1	S.M[+15.995]PLPPHPGHPGYINFS[+79.966]YE.V		M[+16], S[+80]	716.984	3	2148.94	2148.92	0	5.8	17	Non	418.7	418.7	27.01	5.92	1278	>sp|P02817|AMELX_BOVIN Amelogenin, X isoform OS=Bos taurus OX=9913 GN=AMELX PE=1 SV=2	1	hf1_10472_ebo_28_1_261219.ScanId;v=1;d1=17882.17882.3	controllerType=0 controllerNumber=1 scan=17882	38.9069
22973:3	1	S.M[+15.995]PLPPHPGHPGYINFS[+79.966]YE.V		M[+16], S[+80]	716.984	3	2148.94	2148.92	0	6.2	17	Non	434.58	434.58	17.64	6.16	1278	>sp|P02817|AMELX_BOVIN Amelogenin, X isoform OS=Bos taurus OX=9913 GN=AMELX PE=1 SV=2	1	hf1_10472_ebo_28_1_261219.ScanId;v=1;d1=17469.17469.3	controllerType=0 controllerNumber=1 scan=17469	38.2082
22665:3	1	S.M[+15.995]PLPPHPGHPGYINFS[+79.966]YE.V		M[+16], S[+80]	716.984	3	2148.94	2148.92	0	5.5	17	Non	434.91	434.91	27.72	5.92	1278	>sp|P02817|AMELX_BOVIN Amelogenin, X isoform OS=Bos taurus OX=9913 GN=AMELX PE=1 SV=2	1	hf1_10472_ebo_28_1_261219.ScanId;v=1;d1=17266.17266.3	controllerType=0 controllerNumber=1 scan=17266	37.8571
23268:3	1	S.M[+15.995]PLPPHPGHPGYINFS[+79.966]YE.V		M[+16], S[+80]	716.984	3	2148.94	2148.92	0	6.2	17	Non	436.77	436.77	28.98	6.1	1278	>sp|P02817|AMELX_BOVIN Amelogenin, X isoform OS=Bos taurus OX=9913 GN=AMELX PE=1 SV=2	1	hf1_10472_ebo_28_1_261219.ScanId;v=1;d1=17673.17673.3	controllerType=0 controllerNumber=1 scan=17673	38.5513
23332:2	1	S.M[+15.995]PLPPHPGHPGYINFS[+79.966]YE.V		M[+16], S[+80]	1074.97	2	2148.94	2148.92	0	6.8	17	Non	456.85	456.85	13.74	6.34	1278	>sp|P02817|AMELX_BOVIN Amelogenin, X isoform OS=Bos taurus OX=9913 GN=AMELX PE=1 SV=2	1	hf1_10472_ebo_28_1_261219.ScanId;v=1;d1=17716.17716.2	controllerType=0 controllerNumber=1 scan=17716	38.6255
23025:2	1	S.M[+15.995]PLPPHPGHPGYINFS[+79.966]YE.V		M[+16], S[+80]	1074.97	2	2148.94	2148.92	0	5.7	17	Non	483.84	483.84	40.14	6.17	1278	>sp|P02817|AMELX_BOVIN Amelogenin, X isoform OS=Bos taurus OX=9913 GN=AMELX PE=1 SV=2	1	hf1_10472_ebo_28_1_261219.ScanId;v=1;d1=17504.17504.2	controllerType=0 controllerNumber=1 scan=17504	38.2682
23900:3	1	S.M[+15.995]PLPPHPGHPGYIN[+0.984]FS[+79.966]YE.V		M[+16], N[+1], S[+80]	717.314	3	2149.93	2149.91	0	9.4	17	Non	263.98	263.98	18.85	3.95	1278	>sp|P02817|AMELX_BOVIN Amelogenin, X isoform OS=Bos taurus OX=9913 GN=AMELX PE=1 SV=2	1	hf1_10472_ebo_28_1_261219.ScanId;v=1;d1=18090.18090.3	controllerType=0 controllerNumber=1 scan=18090	39.2638
35644:2	1	S.MPLPPHPGHPGYIN[+0.984]FSYEVL.T		N[+1]	1133.55	2	2266.09	2266.1	0	-2.9	17	Non	137.69	137.69	137.69	0.97	1278	>sp|P02817|AMELX_BOVIN Amelogenin, X isoform OS=Bos taurus OX=9913 GN=AMELX PE=1 SV=2	1	hf1_10472_ebo_28_1_261219.ScanId;v=1;d1=26052.26052.3	controllerType=0 controllerNumber=1 scan=26052	53.0863
31585:3	1	S.MPLPPHPGHPGYINFS[+79.966]YEVL.T		S[+80]	782.371	3	2345.1	2345.08	0	6.8	17	Non	190.42	190.42	57.98	2.34	1278	>sp|P02817|AMELX_BOVIN Amelogenin, X isoform OS=Bos taurus OX=9913 GN=AMELX PE=1 SV=2	1	hf1_10472_ebo_28_1_261219.ScanId;v=1;d1=23298.23298.3	controllerType=0 controllerNumber=1 scan=23298	48.2628
31814:2	1	S.MPLPPHPGHPGYINFS[+79.966]YEVL.T		S[+80]	1173.05	2	2345.1	2345.08	0	6.4	17	Non	265.43	265.43	117.23	4.6	1278	>sp|P02817|AMELX_BOVIN Amelogenin, X isoform OS=Bos taurus OX=9913 GN=AMELX PE=1 SV=2	1	hf1_10472_ebo_28_1_261219.ScanId;v=1;d1=23456.23456.2	controllerType=0 controllerNumber=1 scan=23456	48.5355
31880:3	1	S.MPLPPHPGHPGYINFS[+79.966]YEVL.T		S[+80]	782.371	3	2345.1	2345.08	0	6.4	17	Non	301.44	301.44	145.19	4.48	1278	>sp|P02817|AMELX_BOVIN Amelogenin, X isoform OS=Bos taurus OX=9913 GN=AMELX PE=1 SV=2	1	hf1_10472_ebo_28_1_261219.ScanId;v=1;d1=23504.23504.3	controllerType=0 controllerNumber=1 scan=23504	48.6197
32161:3	1	S.MPLPPHPGHPGYINFS[+79.966]YEVL.T		S[+80]	782.37	3	2345.1	2345.08	0	6	17	Non	317.96	317.96	101	4.48	1278	>sp|P02817|AMELX_BOVIN Amelogenin, X isoform OS=Bos taurus OX=9913 GN=AMELX PE=1 SV=2	1	hf1_10472_ebo_28_1_261219.ScanId;v=1;d1=23701.23701.3	controllerType=0 controllerNumber=1 scan=23701	48.9684
31720:2	1	S.MPLPPHPGHPGYINFS[+79.966]YEVL.T		S[+80]	1173.05	2	2345.09	2345.08	0	5	17	Non	339.2	339.2	191.86	4.9	1278	>sp|P02817|AMELX_BOVIN Amelogenin, X isoform OS=Bos taurus OX=9913 GN=AMELX PE=1 SV=2	1	hf1_10472_ebo_28_1_261219.ScanId;v=1;d1=23390.23390.2	controllerType=0 controllerNumber=1 scan=23390	48.4204
30271:3	1	S.MP[+15.995]LPPHPGHPGYINFS[+79.966]YEVL.T		P[+16], S[+80]	787.703	3	2361.1	2361.08	0	7.6	17	Non	169.45	169.45	4.15	2.34	1278	>sp|P02817|AMELX_BOVIN Amelogenin, X isoform OS=Bos taurus OX=9913 GN=AMELX PE=1 SV=2	1	hf1_10472_ebo_28_1_261219.ScanId;v=1;d1=22387.22387.5	controllerType=0 controllerNumber=1 scan=22387	46.6808
29573:3	1	S.MP[+15.995]LPPHPGHPGYINFS[+79.966]YEVL.T		P[+16], S[+80]	787.702	3	2361.09	2361.08	0	6.3	17	Non	306.47	306.47	5.8	4.48	1278	>sp|P02817|AMELX_BOVIN Amelogenin, X isoform OS=Bos taurus OX=9913 GN=AMELX PE=1 SV=2	1	hf1_10472_ebo_28_1_261219.ScanId;v=1;d1=21920.21920.3	controllerType=0 controllerNumber=1 scan=21920	45.8715
29527:2	1	S.M[+15.995]PLPPHPGHPGYINFS[+79.966]YEVL.T		M[+16], S[+80]	1181.05	2	2361.09	2361.08	0	5.3	17	Non	362.68	362.68	10.12	6.02	1278	>sp|P02817|AMELX_BOVIN Amelogenin, X isoform OS=Bos taurus OX=9913 GN=AMELX PE=1 SV=2	1	hf1_10472_ebo_28_1_261219.ScanId;v=1;d1=21889.21889.2	controllerType=0 controllerNumber=1 scan=21889	45.817
29842:2	1	S.M[+15.995]PLPPHPGHPGYINFS[+79.966]YEVL.T		M[+16], S[+80]	1181.05	2	2361.1	2361.08	0	9.2	17	Non	364.57	364.57	11.98	5.39	1278	>sp|P02817|AMELX_BOVIN Amelogenin, X isoform OS=Bos taurus OX=9913 GN=AMELX PE=1 SV=2	1	hf1_10472_ebo_28_1_261219.ScanId;v=1;d1=22097.22097.2	controllerType=0 controllerNumber=1 scan=22097	46.1768
29335:2	1	S.MP[+15.995]LPPHPGHPGYIN[+0.984]FS[+79.966]YEVL.T		N[+1], P[+16], S[+80]	1181.54	2	2362.07	2362.06	0	4.4	17	Non	167.88	167.88	4	2.89	1278	>sp|P02817|AMELX_BOVIN Amelogenin, X isoform OS=Bos taurus OX=9913 GN=AMELX PE=1 SV=2	1	hf1_10472_ebo_28_1_261219.ScanId;v=1;d1=21756.21756.2	controllerType=0 controllerNumber=1 scan=21756	45.5867
49097:3	1	S.MPLPPHPGHPGYINFS[+79.966]YEVLTP.L		S[+80]	848.405	3	2543.2	2543.18	0	6.9	17	Non	63.53	63.53	2.18	2.27	1278	>sp|P02817|AMELX_BOVIN Amelogenin, X isoform OS=Bos taurus OX=9913 GN=AMELX PE=1 SV=2	1	hf1_10472_ebo_28_1_261219.ScanId;v=1;d1=35854.35854.3	controllerType=0 controllerNumber=1 scan=35854	73.4758
32312:3	1	S.MPLPPHPGHPGYINFS[+79.966]YEVLTP.L		S[+80]	848.401	3	2543.19	2543.18	0	2	17	Non	254.64	254.64	51.03	3.99	1278	>sp|P02817|AMELX_BOVIN Amelogenin, X isoform OS=Bos taurus OX=9913 GN=AMELX PE=1 SV=2	1	hf1_10472_ebo_28_1_261219.ScanId;v=1;d1=23803.23803.3	controllerType=0 controllerNumber=1 scan=23803	49.1456
31997:3	1	S.MPLPPHPGHPGYINFS[+79.966]YEVLTP.L		S[+80]	848.405	3	2543.2	2543.18	0	7	17	Non	301.8	301.8	109.72	5.45	1278	>sp|P02817|AMELX_BOVIN Amelogenin, X isoform OS=Bos taurus OX=9913 GN=AMELX PE=1 SV=2	1	hf1_10472_ebo_28_1_261219.ScanId;v=1;d1=23587.23587.3	controllerType=0 controllerNumber=1 scan=23587	48.7682
31673:3	1	S.MPLPPHPGHPGYINFS[+79.966]YEVLTP.L		S[+80]	848.404	3	2543.2	2543.18	0	6.2	17	Non	324.21	324.21	111.22	5.19	1278	>sp|P02817|AMELX_BOVIN Amelogenin, X isoform OS=Bos taurus OX=9913 GN=AMELX PE=1 SV=2	1	hf1_10472_ebo_28_1_261219.ScanId;v=1;d1=23360.23360.3	controllerType=0 controllerNumber=1 scan=23360	48.3702
28113:3	1	S.MP[+15.995]LPPHPGHPGYINFSYEVLTP.L		P[+16]	827.082	3	2479.23	2479.21	0	7.6	17	Non	338.3	338.3	5.8	5.68	1278	>sp|P02817|AMELX_BOVIN Amelogenin, X isoform OS=Bos taurus OX=9913 GN=AMELX PE=1 SV=2	1	hf1_10472_ebo_28_1_261219.ScanId;v=1;d1=20930.20930.3	controllerType=0 controllerNumber=1 scan=20930	44.1567
29724:3	1	S.MP[+15.995]LPPHPGHPGYINFS[+79.966]YEVLTP.L		P[+16], S[+80]	853.736	3	2559.2	2559.18	0	6.7	17	Non	199.2	199.2	11.9	3.26	1278	>sp|P02817|AMELX_BOVIN Amelogenin, X isoform OS=Bos taurus OX=9913 GN=AMELX PE=1 SV=2	1	hf1_10472_ebo_28_1_261219.ScanId;v=1;d1=22019.22019.3	controllerType=0 controllerNumber=1 scan=22019	46.0421
31940:3	1	S.MPLP[+15.995]PHPGHP[+31.990]GYINF[+31.990]SYEVLTP.L		F[+32], P[+16][+32]	848.404	3	2543.2	2543.19	0	2.6	17	Non	69.74	69.74	4.86	0.77	1278	>sp|P02817|AMELX_BOVIN Amelogenin, X isoform OS=Bos taurus OX=9913 GN=AMELX PE=1 SV=2	1	hf1_10472_ebo_28_1_261219.ScanId;v=1;d1=23546.23546.4	controllerType=0 controllerNumber=1 scan=23546	48.6941
32614:3	1	S.MPLPPHPGHP[+31.990]GY[+31.990]INF[+15.995]SYEVLTP.L		F[+16], P[+32], Y[+32]	848.401	3	2543.19	2543.19	0	-0.6	17	Non	156.18	156.18	2	2.21	1278	>sp|P02817|AMELX_BOVIN Amelogenin, X isoform OS=Bos taurus OX=9913 GN=AMELX PE=1 SV=2	1	hf1_10472_ebo_28_1_261219.ScanId;v=1;d1=24003.24003.3	controllerType=0 controllerNumber=1 scan=24003	49.496
46373:3	1	S.MPLPPHPGHPGYINFS[+79.966]YEVLTPL.K		S[+80]	886.099	3	2656.28	2656.27	0	5.7	17	Non	0.95	0.95	0.95	2.22	1278	>sp|P02817|AMELX_BOVIN Amelogenin, X isoform OS=Bos taurus OX=9913 GN=AMELX PE=1 SV=2	1	hf1_10472_ebo_28_1_261219.ScanId;v=1;d1=33306.33306.3	controllerType=0 controllerNumber=1 scan=33306	66.2151
49084:4	1	S.MPLPPHPGHPGYINFS[+79.966]YEVLTPL.K		S[+80]	664.826	4	2656.28	2656.27	0	5.8	17	Non	59.7	59.7	1.65	1.19	1278	>sp|P02817|AMELX_BOVIN Amelogenin, X isoform OS=Bos taurus OX=9913 GN=AMELX PE=1 SV=2	1	hf1_10472_ebo_28_1_261219.ScanId;v=1;d1=35844.35844.4	controllerType=0 controllerNumber=1 scan=35844	73.4578
45275:3	1	S.MPLPPHPGHPGYINFS[+79.966]YEVLTPL.K		S[+80]	886.098	3	2656.28	2656.27	0	5.3	17	Non	104.84	104.84	5.01	2.17	1278	>sp|P02817|AMELX_BOVIN Amelogenin, X isoform OS=Bos taurus OX=9913 GN=AMELX PE=1 SV=2	1	hf1_10472_ebo_28_1_261219.ScanId;v=1;d1=32411.32411.3	controllerType=0 controllerNumber=1 scan=32411	64.3987
45562:3	1	S.MPLPPHPGHPGYINFS[+79.966]YEVLTPL.K		S[+80]	886.101	3	2656.29	2656.27	0	7.6	17	Non	113.78	113.78	38.03	2.43	1278	>sp|P02817|AMELX_BOVIN Amelogenin, X isoform OS=Bos taurus OX=9913 GN=AMELX PE=1 SV=2	1	hf1_10472_ebo_28_1_261219.ScanId;v=1;d1=32613.32613.3	controllerType=0 controllerNumber=1 scan=32613	64.7631
42559:3	1	S.MPLPPHPGHPGYINFS[+79.966]YEVLTPL.K		S[+80]	886.099	3	2656.28	2656.27	0	5.9	17	Non	142.19	142.19	0.1	2.22	1278	>sp|P02817|AMELX_BOVIN Amelogenin, X isoform OS=Bos taurus OX=9913 GN=AMELX PE=1 SV=2	1	hf1_10472_ebo_28_1_261219.ScanId;v=1;d1=30637.30637.3	controllerType=0 controllerNumber=1 scan=30637	61.2339
43473:3	1	S.MPLPPHPGHPGYINFS[+79.966]YEVLTPL.K		S[+80]	886.1	3	2656.29	2656.27	0	7.3	17	Non	148.13	148.13	10.29	2.68	1278	>sp|P02817|AMELX_BOVIN Amelogenin, X isoform OS=Bos taurus OX=9913 GN=AMELX PE=1 SV=2	1	hf1_10472_ebo_28_1_261219.ScanId;v=1;d1=31222.31222.3	controllerType=0 controllerNumber=1 scan=31222	62.2795
41966:3	1	S.MPLPPHPGHPGYINFS[+79.966]YEVLTPL.K		S[+80]	886.1	3	2656.29	2656.27	0	6.8	17	Non	149.82	149.82	49.86	2.68	1278	>sp|P02817|AMELX_BOVIN Amelogenin, X isoform OS=Bos taurus OX=9913 GN=AMELX PE=1 SV=2	1	hf1_10472_ebo_28_1_261219.ScanId;v=1;d1=30241.30241.3	controllerType=0 controllerNumber=1 scan=30241	60.5308
42262:3	1	S.MPLPPHPGHPGYINFS[+79.966]YEVLTPL.K		S[+80]	886.1	3	2656.28	2656.27	0	6.5	17	Non	156.16	156.16	21.04	2.68	1278	>sp|P02817|AMELX_BOVIN Amelogenin, X isoform OS=Bos taurus OX=9913 GN=AMELX PE=1 SV=2	1	hf1_10472_ebo_28_1_261219.ScanId;v=1;d1=30440.30440.3	controllerType=0 controllerNumber=1 scan=30440	60.8839
44072:3	1	S.MPLPPHPGHPGYINFS[+79.966]YEVLTPL.K		S[+80]	886.098	3	2656.28	2656.27	0	4.8	17	Non	160.55	160.55	30.4	2.52	1278	>sp|P02817|AMELX_BOVIN Amelogenin, X isoform OS=Bos taurus OX=9913 GN=AMELX PE=1 SV=2	1	hf1_10472_ebo_28_1_261219.ScanId;v=1;d1=31620.31620.3	controllerType=0 controllerNumber=1 scan=31620	62.9897
44370:3	1	S.MPLPPHPGHPGYINFS[+79.966]YEVLTPL.K		S[+80]	886.099	3	2656.28	2656.27	0	5.6	17	Non	165.16	165.16	18.51	3.03	1278	>sp|P02817|AMELX_BOVIN Amelogenin, X isoform OS=Bos taurus OX=9913 GN=AMELX PE=1 SV=2	1	hf1_10472_ebo_28_1_261219.ScanId;v=1;d1=31817.31817.3	controllerType=0 controllerNumber=1 scan=31817	63.3429
43161:3	1	S.MPLPPHPGHPGYINFS[+79.966]YEVLTPL.K		S[+80]	886.101	3	2656.29	2656.27	0	8.5	17	Non	177.13	177.13	45.17	2.67	1278	>sp|P02817|AMELX_BOVIN Amelogenin, X isoform OS=Bos taurus OX=9913 GN=AMELX PE=1 SV=2	1	hf1_10472_ebo_28_1_261219.ScanId;v=1;d1=31025.31025.3	controllerType=0 controllerNumber=1 scan=31025	61.9285
42870:3	1	S.MPLPPHPGHPGYINFS[+79.966]YEVLTPL.K		S[+80]	886.101	3	2656.29	2656.27	0	7.9	17	Non	204	204	25.1	3.43	1278	>sp|P02817|AMELX_BOVIN Amelogenin, X isoform OS=Bos taurus OX=9913 GN=AMELX PE=1 SV=2	1	hf1_10472_ebo_28_1_261219.ScanId;v=1;d1=30834.30834.3	controllerType=0 controllerNumber=1 scan=30834	61.5853
29504:4	1	S.MP[+15.995]LPPHPGHPGYINFSYEVLTPL.K		P[+16]	648.832	4	2592.31	2592.3	0	4.5	17	Non	215.79	212.98	5.8	2.74	1278	>sp|P02817|AMELX_BOVIN Amelogenin, X isoform OS=Bos taurus OX=9913 GN=AMELX PE=1 SV=2	1	hf1_10472_ebo_28_1_261219.ScanId;v=1;d1=21874.21874.4	controllerType=0 controllerNumber=1 scan=21874	45.792
29035:4	1	S.MP[+15.995]LPPHPGHPGYINFSYEVLTPL.K		P[+16]	648.833	4	2592.31	2592.3	0	5.1	17	Non	219.51	164.24	5.8	2.41	1278	>sp|P02817|AMELX_BOVIN Amelogenin, X isoform OS=Bos taurus OX=9913 GN=AMELX PE=1 SV=2	1	hf1_10472_ebo_28_1_261219.ScanId;v=1;d1=21548.21548.4	controllerType=0 controllerNumber=1 scan=21548	45.2234
44982:3	1	S.MPLPPHPGHPGYINFS[+79.966]YEVLTPL.K		S[+80]	886.1	3	2656.28	2656.27	0	6.3	17	Non	222.57	222.57	33.03	3.19	1278	>sp|P02817|AMELX_BOVIN Amelogenin, X isoform OS=Bos taurus OX=9913 GN=AMELX PE=1 SV=2	1	hf1_10472_ebo_28_1_261219.ScanId;v=1;d1=32214.32214.3	controllerType=0 controllerNumber=1 scan=32214	64.0495
35254:4	1	S.MPLPPHPGHPGYINFS[+79.966]YEVLTPL.K		S[+80]	664.826	4	2656.28	2656.27	0	6	17	Non	237.71	237.71	73.37	2.74	1278	>sp|P02817|AMELX_BOVIN Amelogenin, X isoform OS=Bos taurus OX=9913 GN=AMELX PE=1 SV=2	1	hf1_10472_ebo_28_1_261219.ScanId;v=1;d1=25783.25783.4	controllerType=0 controllerNumber=1 scan=25783	52.6153
38759:3	1	S.MPLPPHPGHPGYINFS[+79.966]YEVLTPL.K		S[+80]	886.1	3	2656.29	2656.27	0	6.9	17	Non	246.53	246.53	74.76	4.76	1278	>sp|P02817|AMELX_BOVIN Amelogenin, X isoform OS=Bos taurus OX=9913 GN=AMELX PE=1 SV=2	1	hf1_10472_ebo_28_1_261219.ScanId;v=1;d1=28143.28143.3	controllerType=0 controllerNumber=1 scan=28143	56.8054
34961:4	1	S.MPLPPHPGHPGYINFS[+79.966]YEVLTPL.K		S[+80]	664.825	4	2656.28	2656.27	0	3.6	17	Non	252.82	252.82	76.47	3.73	1278	>sp|P02817|AMELX_BOVIN Amelogenin, X isoform OS=Bos taurus OX=9913 GN=AMELX PE=1 SV=2	1	hf1_10472_ebo_28_1_261219.ScanId;v=1;d1=25583.25583.4	controllerType=0 controllerNumber=1 scan=25583	52.2609
37567:3	1	S.MPLPPHPGHPGYINFS[+79.966]YEVLTPL.K		S[+80]	886.098	3	2656.28	2656.27	0	4.7	17	Non	256.63	256.63	78.98	4.51	1278	>sp|P02817|AMELX_BOVIN Amelogenin, X isoform OS=Bos taurus OX=9913 GN=AMELX PE=1 SV=2	1	hf1_10472_ebo_28_1_261219.ScanId;v=1;d1=27350.27350.3	controllerType=0 controllerNumber=1 scan=27350	55.3956
38470:3	1	S.MPLPPHPGHPGYINFS[+79.966]YEVLTPL.K		S[+80]	886.098	3	2656.28	2656.27	0	4.6	17	Non	268.82	268.82	38.05	3.68	1278	>sp|P02817|AMELX_BOVIN Amelogenin, X isoform OS=Bos taurus OX=9913 GN=AMELX PE=1 SV=2	1	hf1_10472_ebo_28_1_261219.ScanId;v=1;d1=27945.27945.3	controllerType=0 controllerNumber=1 scan=27945	56.4541
38179:3	1	S.MPLPPHPGHPGYINFS[+79.966]YEVLTPL.K		S[+80]	886.098	3	2656.28	2656.27	0	4.8	17	Non	271.36	271.36	49.94	4.51	1278	>sp|P02817|AMELX_BOVIN Amelogenin, X isoform OS=Bos taurus OX=9913 GN=AMELX PE=1 SV=2	1	hf1_10472_ebo_28_1_261219.ScanId;v=1;d1=27752.27752.3	controllerType=0 controllerNumber=1 scan=27752	56.1071
32232:3	1	S.MP[+15.995]LPPHPGHPGYINFSYEVLTPL.K		P[+16]	864.775	3	2592.31	2592.3	0	6.4	17	Non	280.2	278.48	5.8	4.87	1278	>sp|P02817|AMELX_BOVIN Amelogenin, X isoform OS=Bos taurus OX=9913 GN=AMELX PE=1 SV=2	1	hf1_10472_ebo_28_1_261219.ScanId;v=1;d1=23749.23749.4	controllerType=0 controllerNumber=1 scan=23749	49.0517
44684:3	1	S.MPLPPHPGHPGYINFS[+79.966]YEVLTPL.K		S[+80]	886.1	3	2656.28	2656.27	0	6.4	17	Non	282.56	282.56	50.62	5.21	1278	>sp|P02817|AMELX_BOVIN Amelogenin, X isoform OS=Bos taurus OX=9913 GN=AMELX PE=1 SV=2	1	hf1_10472_ebo_28_1_261219.ScanId;v=1;d1=32016.32016.3	controllerType=0 controllerNumber=1 scan=32016	63.6975
34890:2	1	S.MPLPPHPGHPGYINFS[+79.966]YEVLTPL.K		S[+80]	1328.65	2	2656.28	2656.27	0	6.3	17	Non	297.96	297.96	107.78	5.14	1278	>sp|P02817|AMELX_BOVIN Amelogenin, X isoform OS=Bos taurus OX=9913 GN=AMELX PE=1 SV=2	1	hf1_10472_ebo_28_1_261219.ScanId;v=1;d1=25534.25534.2	controllerType=0 controllerNumber=1 scan=25534	52.1722
36033:2	1	S.MPLPPHPGHPGYINFS[+79.966]YEVLTPL.K		S[+80]	1328.64	2	2656.27	2656.27	0	1.5	17	Non	301.19	301.19	106.92	4.26	1278	>sp|P02817|AMELX_BOVIN Amelogenin, X isoform OS=Bos taurus OX=9913 GN=AMELX PE=1 SV=2	1	hf1_10472_ebo_28_1_261219.ScanId;v=1;d1=26325.26325.2	controllerType=0 controllerNumber=1 scan=26325	53.5805
35762:2	1	S.MPLPPHPGHPGYINFS[+79.966]YEVLTPL.K		S[+80]	1328.65	2	2656.29	2656.27	0	9.6	17	Non	304.82	304.82	97.79	4.69	1278	>sp|P02817|AMELX_BOVIN Amelogenin, X isoform OS=Bos taurus OX=9913 GN=AMELX PE=1 SV=2	1	hf1_10472_ebo_28_1_261219.ScanId;v=1;d1=26134.26134.2	controllerType=0 controllerNumber=1 scan=26134	53.2338
37866:3	1	S.MPLPPHPGHPGYINFS[+79.966]YEVLTPL.K		S[+80]	886.101	3	2656.29	2656.27	0	8.6	17	Non	310.71	310.71	89.51	4.51	1278	>sp|P02817|AMELX_BOVIN Amelogenin, X isoform OS=Bos taurus OX=9913 GN=AMELX PE=1 SV=2	1	hf1_10472_ebo_28_1_261219.ScanId;v=1;d1=27551.27551.3	controllerType=0 controllerNumber=1 scan=27551	55.7518
36074:3	1	S.MPLPPHPGHPGYINFS[+79.966]YEVLTPL.K		S[+80]	886.093	3	2656.27	2656.27	0	-0.7	17	Non	324.38	324.38	76.37	4.28	1278	>sp|P02817|AMELX_BOVIN Amelogenin, X isoform OS=Bos taurus OX=9913 GN=AMELX PE=1 SV=2	1	hf1_10472_ebo_28_1_261219.ScanId;v=1;d1=26353.26353.3	controllerType=0 controllerNumber=1 scan=26353	53.633
37263:3	1	S.MPLPPHPGHPGYINFS[+79.966]YEVLTPL.K		S[+80]	886.1	3	2656.29	2656.27	0	7.4	17	Non	330.75	330.75	66.7	5.45	1278	>sp|P02817|AMELX_BOVIN Amelogenin, X isoform OS=Bos taurus OX=9913 GN=AMELX PE=1 SV=2	1	hf1_10472_ebo_28_1_261219.ScanId;v=1;d1=27147.27147.3	controllerType=0 controllerNumber=1 scan=27147	55.037
32642:3	1	S.MP[+15.995]LPPHPGHPGYINFSYEVLTPL.K		P[+16]	864.77	3	2592.29	2592.3	0	-0.5	17	Non	357.33	304.22	5.8	4.34	1278	>sp|P02817|AMELX_BOVIN Amelogenin, X isoform OS=Bos taurus OX=9913 GN=AMELX PE=1 SV=2	1	hf1_10472_ebo_28_1_261219.ScanId;v=1;d1=24022.24022.3	controllerType=0 controllerNumber=1 scan=24022	49.5294
36664:3	1	S.MPLPPHPGHPGYINFS[+79.966]YEVLTPL.K		S[+80]	886.1	3	2656.29	2656.27	0	7.3	17	Non	360.33	360.33	65.67	5.53	1278	>sp|P02817|AMELX_BOVIN Amelogenin, X isoform OS=Bos taurus OX=9913 GN=AMELX PE=1 SV=2	1	hf1_10472_ebo_28_1_261219.ScanId;v=1;d1=26753.26753.3	controllerType=0 controllerNumber=1 scan=26753	54.3422
34939:3	1	S.MPLPPHPGHPGYINFS[+79.966]YEVLTPL.K		S[+80]	886.099	3	2656.28	2656.27	0	5.5	17	Non	373.51	373.51	102.03	6.37	1278	>sp|P02817|AMELX_BOVIN Amelogenin, X isoform OS=Bos taurus OX=9913 GN=AMELX PE=1 SV=2	1	hf1_10472_ebo_28_1_261219.ScanId;v=1;d1=25568.25568.3	controllerType=0 controllerNumber=1 scan=25568	52.2328
35511:3	1	S.MPLPPHPGHPGYINFS[+79.966]YEVLTPL.K		S[+80]	886.098	3	2656.28	2656.27	0	4.9	17	Non	383.8	383.8	110.78	6.55	1278	>sp|P02817|AMELX_BOVIN Amelogenin, X isoform OS=Bos taurus OX=9913 GN=AMELX PE=1 SV=2	1	hf1_10472_ebo_28_1_261219.ScanId;v=1;d1=25960.25960.3	controllerType=0 controllerNumber=1 scan=25960	52.9283
35464:2	1	S.MPLPPHPGHPGYINFS[+79.966]YEVLTPL.K		S[+80]	1328.65	2	2656.29	2656.27	0	7.2	17	Non	390.61	390.61	134.54	6.58	1278	>sp|P02817|AMELX_BOVIN Amelogenin, X isoform OS=Bos taurus OX=9913 GN=AMELX PE=1 SV=2	1	hf1_10472_ebo_28_1_261219.ScanId;v=1;d1=25929.25929.2	controllerType=0 controllerNumber=1 scan=25929	52.8733
35793:3	1	S.MPLPPHPGHPGYINFS[+79.966]YEVLTPL.K		S[+80]	886.097	3	2656.28	2656.27	0	3.2	17	Non	402.36	402.36	84.77	6.15	1278	>sp|P02817|AMELX_BOVIN Amelogenin, X isoform OS=Bos taurus OX=9913 GN=AMELX PE=1 SV=2	1	hf1_10472_ebo_28_1_261219.ScanId;v=1;d1=26159.26159.3	controllerType=0 controllerNumber=1 scan=26159	53.2784
35521:3	1	S.MPLPPHPGHPGYINFS[+79.966]YEVLTPL.K		S[+80]	886.098	3	2656.28	2656.27	0	4.9	17	Non	420.12	420.12	130.44	6.58	1278	>sp|P02817|AMELX_BOVIN Amelogenin, X isoform OS=Bos taurus OX=9913 GN=AMELX PE=1 SV=2	1	hf1_10472_ebo_28_1_261219.ScanId;v=1;d1=25967.25967.3	controllerType=0 controllerNumber=1 scan=25967	52.9374
31867:3	1	S.MP[+15.995]LPPHPGHPGYINFSYEVLTPL.K		P[+16]	864.775	3	2592.31	2592.3	0	6	17	Non	421.21	414.06	4	6.63	1278	>sp|P02817|AMELX_BOVIN Amelogenin, X isoform OS=Bos taurus OX=9913 GN=AMELX PE=1 SV=2	1	hf1_10472_ebo_28_1_261219.ScanId;v=1;d1=23492.23492.3	controllerType=0 controllerNumber=1 scan=23492	48.5992
35216:3	1	S.MPLPPHPGHPGYINFS[+79.966]YEVLTPL.K		S[+80]	886.099	3	2656.28	2656.27	0	5.7	17	Non	456.49	456.49	130.96	6.56	1278	>sp|P02817|AMELX_BOVIN Amelogenin, X isoform OS=Bos taurus OX=9913 GN=AMELX PE=1 SV=2	1	hf1_10472_ebo_28_1_261219.ScanId;v=1;d1=25760.25760.3	controllerType=0 controllerNumber=1 scan=25760	52.5755
35166:2	1	S.MPLPPHPGHPGYINFS[+79.966]YEVLTPL.K		S[+80]	1328.65	2	2656.29	2656.27	0	9.1	17	Non	474.99	474.99	155.34	6.12	1278	>sp|P02817|AMELX_BOVIN Amelogenin, X isoform OS=Bos taurus OX=9913 GN=AMELX PE=1 SV=2	1	hf1_10472_ebo_28_1_261219.ScanId;v=1;d1=25728.25728.2	controllerType=0 controllerNumber=1 scan=25728	52.5195
47629:3	1	S.MP[+15.995]LPPHPGHPGYINFS[+79.966]YEVLTPL.K		P[+16], S[+80]	891.43	3	2672.27	2672.26	0	4.8	17	Non	36.14	36.14	4	2.3	1278	>sp|P02817|AMELX_BOVIN Amelogenin, X isoform OS=Bos taurus OX=9913 GN=AMELX PE=1 SV=2	1	hf1_10472_ebo_28_1_261219.ScanId;v=1;d1=34434.34434.3	controllerType=0 controllerNumber=1 scan=34434	69.2767
35915:4	1	S.MPLPPHPGHPGYIN[+0.984]FS[+79.966]YEVLTPL.K		N[+1], S[+80]	665.073	4	2657.27	2657.25	0	6.9	17	Non	65.55	65.55	11.63	0.31	1278	>sp|P02817|AMELX_BOVIN Amelogenin, X isoform OS=Bos taurus OX=9913 GN=AMELX PE=1 SV=2	1	hf1_10472_ebo_28_1_261219.ScanId;v=1;d1=26243.26243.4	controllerType=0 controllerNumber=1 scan=26243	53.4302
46143:3	1	S.MP[+15.995]LPPHPGHPGYINFS[+79.966]YEVLTPL.K		P[+16], S[+80]	891.43	3	2672.28	2672.26	0	5.1	17	Non	89.79	89.79	4	2.64	1278	>sp|P02817|AMELX_BOVIN Amelogenin, X isoform OS=Bos taurus OX=9913 GN=AMELX PE=1 SV=2	1	hf1_10472_ebo_28_1_261219.ScanId;v=1;d1=33099.33099.3	controllerType=0 controllerNumber=1 scan=33099	65.7602
00469:3	1	S.MP[+15.995]LPPHPGHPGYINFS[+79.966]YEVLTPL.K		P[+16], S[+80]	891.428	3	2672.27	2672.26	0	2.9	17	Non	99.25	99.25	4	2.26	1278	>sp|P02817|AMELX_BOVIN Amelogenin, X isoform OS=Bos taurus OX=9913 GN=AMELX PE=1 SV=2	1	hf1_10472_ebo_28_1_261219.ScanId;v=1;d1=1890.1890.3	controllerType=0 controllerNumber=1 scan=1890	10.1485
49152:4	1	S.MP[+15.995]LPPHPGHPGYINFS[+79.966]YEVLTPL.K		P[+16], S[+80]	668.826	4	2672.28	2672.26	0	7.1	17	Non	111.11	111.11	5.8	2.19	1278	>sp|P02817|AMELX_BOVIN Amelogenin, X isoform OS=Bos taurus OX=9913 GN=AMELX PE=1 SV=2	1	hf1_10472_ebo_28_1_261219.ScanId;v=1;d1=35890.35890.4	controllerType=0 controllerNumber=1 scan=35890	73.5383
44690:3	1	S.MP[+15.995]LPPHPGHPGYINFS[+79.966]YEVLTPL.K		P[+16], S[+80]	891.431	3	2672.28	2672.26	0	5.8	17	Non	114.18	114.18	5.8	2.17	1278	>sp|P02817|AMELX_BOVIN Amelogenin, X isoform OS=Bos taurus OX=9913 GN=AMELX PE=1 SV=2	1	hf1_10472_ebo_28_1_261219.ScanId;v=1;d1=32019.32019.3	controllerType=0 controllerNumber=1 scan=32019	63.7021
45767:3	1	S.MP[+15.995]LPPHPGHPGYINFS[+79.966]YEVLTPL.K		P[+16], S[+80]	891.431	3	2672.28	2672.26	0	6.4	17	Non	127.38	127.38	4	3.17	1278	>sp|P02817|AMELX_BOVIN Amelogenin, X isoform OS=Bos taurus OX=9913 GN=AMELX PE=1 SV=2	1	hf1_10472_ebo_28_1_261219.ScanId;v=1;d1=32775.32775.3	controllerType=0 controllerNumber=1 scan=32775	65.0738
45263:3	1	S.MP[+15.995]LPPHPGHPGYINFS[+79.966]YEVLTPL.K		P[+16], S[+80]	891.431	3	2672.28	2672.26	0	6.3	17	Non	136.51	136.51	4	2.52	1278	>sp|P02817|AMELX_BOVIN Amelogenin, X isoform OS=Bos taurus OX=9913 GN=AMELX PE=1 SV=2	1	hf1_10472_ebo_28_1_261219.ScanId;v=1;d1=32402.32402.3	controllerType=0 controllerNumber=1 scan=32402	64.3823
42438:3	1	S.MPLPPHPGHPGYINFS[+79.966]Y[+15.995]EVLTPL.K		S[+80], Y[+16]	891.431	3	2672.28	2672.26	0	5.8	17	Non	143.49	143.49	7.99	2.22	1278	>sp|P02817|AMELX_BOVIN Amelogenin, X isoform OS=Bos taurus OX=9913 GN=AMELX PE=1 SV=2	1	hf1_10472_ebo_28_1_261219.ScanId;v=1;d1=30560.30560.4	controllerType=0 controllerNumber=1 scan=30560	61.097
42147:3	1	S.MP[+15.995]LPPHPGHPGYINFS[+79.966]YEVLTPL.K		P[+16], S[+80]	891.431	3	2672.28	2672.26	0	6.7	17	Non	160.9	160.9	5.8	2.68	1278	>sp|P02817|AMELX_BOVIN Amelogenin, X isoform OS=Bos taurus OX=9913 GN=AMELX PE=1 SV=2	1	hf1_10472_ebo_28_1_261219.ScanId;v=1;d1=30363.30363.3	controllerType=0 controllerNumber=1 scan=30363	60.7472
43679:3	1	S.MP[+15.995]LPPHPGHPGYINFS[+79.966]YEVLTPL.K		P[+16], S[+80]	891.431	3	2672.28	2672.26	0	6.4	17	Non	163.62	163.62	4	3.6	1278	>sp|P02817|AMELX_BOVIN Amelogenin, X isoform OS=Bos taurus OX=9913 GN=AMELX PE=1 SV=2	1	hf1_10472_ebo_28_1_261219.ScanId;v=1;d1=31359.31359.3	controllerType=0 controllerNumber=1 scan=31359	62.5249
44256:3	1	S.MP[+15.995]LPPHPGHPGYINFS[+79.966]YEVLTPL.K		P[+16], S[+80]	891.431	3	2672.28	2672.26	0	6.1	17	Non	169.28	169.28	1.58	3.03	1278	>sp|P02817|AMELX_BOVIN Amelogenin, X isoform OS=Bos taurus OX=9913 GN=AMELX PE=1 SV=2	1	hf1_10472_ebo_28_1_261219.ScanId;v=1;d1=31740.31740.3	controllerType=0 controllerNumber=1 scan=31740	63.2058
42767:3	1	S.MP[+15.995]LPPHPGHPGYINFS[+79.966]YEVLTPL.K		P[+16], S[+80]	891.432	3	2672.28	2672.26	0	7.5	17	Non	170.08	170.08	5.8	2.58	1278	>sp|P02817|AMELX_BOVIN Amelogenin, X isoform OS=Bos taurus OX=9913 GN=AMELX PE=1 SV=2	1	hf1_10472_ebo_28_1_261219.ScanId;v=1;d1=30772.30772.3	controllerType=0 controllerNumber=1 scan=30772	61.4734
43970:3	1	S.MP[+15.995]LPPHPGHPGYINFS[+79.966]YEVLTPL.K		P[+16], S[+80]	891.431	3	2672.28	2672.26	0	6.2	17	Non	182.21	182.21	5.8	3.03	1278	>sp|P02817|AMELX_BOVIN Amelogenin, X isoform OS=Bos taurus OX=9913 GN=AMELX PE=1 SV=2	1	hf1_10472_ebo_28_1_261219.ScanId;v=1;d1=31550.31550.3	controllerType=0 controllerNumber=1 scan=31550	62.8664
44561:3	1	S.MP[+15.995]LPPHPGHPGYINFS[+79.966]YEVLTPL.K		P[+16], S[+80]	891.432	3	2672.28	2672.26	0	7	17	Non	184.1	184.1	5.8	3.26	1278	>sp|P02817|AMELX_BOVIN Amelogenin, X isoform OS=Bos taurus OX=9913 GN=AMELX PE=1 SV=2	1	hf1_10472_ebo_28_1_261219.ScanId;v=1;d1=31938.31938.3	controllerType=0 controllerNumber=1 scan=31938	63.5583
37822:3	1	S.MP[+15.995]LPPHPGHPGYINFS[+79.966]YEVLTPL.K		P[+16], S[+80]	891.432	3	2672.28	2672.26	0	7.6	17	Non	184.28	184.28	5.8	3.26	1278	>sp|P02817|AMELX_BOVIN Amelogenin, X isoform OS=Bos taurus OX=9913 GN=AMELX PE=1 SV=2	1	hf1_10472_ebo_28_1_261219.ScanId;v=1;d1=27522.27522.3	controllerType=0 controllerNumber=1 scan=27522	55.6994
34622:2	1	S.M[+15.995]PLPPHPGHPGYINFS[+79.966]YEVLTPL.K		M[+16], S[+80]	1336.64	2	2672.28	2672.26	0	6.4	17	Non	186.16	186.16	1.29	2.55	1278	>sp|P02817|AMELX_BOVIN Amelogenin, X isoform OS=Bos taurus OX=9913 GN=AMELX PE=1 SV=2	1	hf1_10472_ebo_28_1_261219.ScanId;v=1;d1=25350.25350.2	controllerType=0 controllerNumber=1 scan=25350	51.8521
41848:3	1	S.MP[+15.995]LPPHPGHPGYINFS[+79.966]YEVLTPL.K		P[+16], S[+80]	891.431	3	2672.28	2672.26	0	5.8	17	Non	192.3	192.3	4	3.03	1278	>sp|P02817|AMELX_BOVIN Amelogenin, X isoform OS=Bos taurus OX=9913 GN=AMELX PE=1 SV=2	1	hf1_10472_ebo_28_1_261219.ScanId;v=1;d1=30165.30165.3	controllerType=0 controllerNumber=1 scan=30165	60.3954
44871:3	1	S.MP[+15.995]LPPHPGHPGYINFS[+79.966]YEVLTPL.K		P[+16], S[+80]	891.43	3	2672.28	2672.26	0	4.9	17	Non	192.91	192.91	5.8	3.03	1278	>sp|P02817|AMELX_BOVIN Amelogenin, X isoform OS=Bos taurus OX=9913 GN=AMELX PE=1 SV=2	1	hf1_10472_ebo_28_1_261219.ScanId;v=1;d1=32138.32138.3	controllerType=0 controllerNumber=1 scan=32138	63.9146
40832:3	1	S.MP[+15.995]LPPHPGHPGYINFS[+79.966]YEVLTPL.K		P[+16], S[+80]	891.432	3	2672.28	2672.26	0	7	17	Non	194.32	194.32	5.8	3.26	1278	>sp|P02817|AMELX_BOVIN Amelogenin, X isoform OS=Bos taurus OX=9913 GN=AMELX PE=1 SV=2	1	hf1_10472_ebo_28_1_261219.ScanId;v=1;d1=29506.29506.3	controllerType=0 controllerNumber=1 scan=29506	59.225
36963:3	1	S.MP[+15.995]LPPHPGHPGYINFS[+79.966]YEVLTPL.K		P[+16], S[+80]	891.432	3	2672.28	2672.26	0	7.4	17	Non	196.94	196.94	0.89	2.58	1278	>sp|P02817|AMELX_BOVIN Amelogenin, X isoform OS=Bos taurus OX=9913 GN=AMELX PE=1 SV=2	1	hf1_10472_ebo_28_1_261219.ScanId;v=1;d1=26952.26952.3	controllerType=0 controllerNumber=1 scan=26952	54.6925
39065:3	1	S.MP[+15.995]LPPHPGHPGYINFS[+79.966]YEVLTPL.K		P[+16], S[+80]	891.43	3	2672.28	2672.26	0	5.1	17	Non	201.96	201.96	5.8	3.19	1278	>sp|P02817|AMELX_BOVIN Amelogenin, X isoform OS=Bos taurus OX=9913 GN=AMELX PE=1 SV=2	1	hf1_10472_ebo_28_1_261219.ScanId;v=1;d1=28340.28340.3	controllerType=0 controllerNumber=1 scan=28340	57.1543
36665:3	1	S.M[+15.995]PLPPHPGHPGYINFS[+79.966]YEVLTPL.K		M[+16], S[+80]	891.431	3	2672.28	2672.26	0	6.2	17	Non	210.48	210.48	0.03	3.19	1278	>sp|P02817|AMELX_BOVIN Amelogenin, X isoform OS=Bos taurus OX=9913 GN=AMELX PE=1 SV=2	1	hf1_10472_ebo_28_1_261219.ScanId;v=1;d1=26754.26754.3	controllerType=0 controllerNumber=1 scan=26754	54.3437
36078:3	1	S.MP[+15.995]LPPHPGHPGYINFS[+79.966]YEVLTPL.K		P[+16], S[+80]	891.431	3	2672.28	2672.26	0	5.7	17	Non	211.32	211.32	5.8	3.19	1278	>sp|P02817|AMELX_BOVIN Amelogenin, X isoform OS=Bos taurus OX=9913 GN=AMELX PE=1 SV=2	1	hf1_10472_ebo_28_1_261219.ScanId;v=1;d1=26355.26355.3	controllerType=0 controllerNumber=1 scan=26355	53.6361
33154:4	1	S.MP[+15.995]LPPHPGHPGYINFS[+79.966]YEVLTPL.K		P[+16], S[+80]	668.825	4	2672.28	2672.26	0	6.2	17	Non	212.89	212.89	5.8	2.5	1278	>sp|P02817|AMELX_BOVIN Amelogenin, X isoform OS=Bos taurus OX=9913 GN=AMELX PE=1 SV=2	1	hf1_10472_ebo_28_1_261219.ScanId;v=1;d1=24365.24365.4	controllerType=0 controllerNumber=1 scan=24365	50.1285
36365:3	1	S.MP[+15.995]LPPHPGHPGYINFS[+79.966]YEVLTPL.K		P[+16], S[+80]	891.431	3	2672.28	2672.26	0	5.7	17	Non	213.41	213.41	5.8	2.54	1278	>sp|P02817|AMELX_BOVIN Amelogenin, X isoform OS=Bos taurus OX=9913 GN=AMELX PE=1 SV=2	1	hf1_10472_ebo_28_1_261219.ScanId;v=1;d1=26556.26556.3	controllerType=0 controllerNumber=1 scan=26556	53.9932
33449:4	1	S.MP[+15.995]LPPHPGHPGYINFS[+79.966]YEVLTPL.K		P[+16], S[+80]	668.825	4	2672.28	2672.26	0	5.9	17	Non	213.5	213.5	5.8	2.5	1278	>sp|P02817|AMELX_BOVIN Amelogenin, X isoform OS=Bos taurus OX=9913 GN=AMELX PE=1 SV=2	1	hf1_10472_ebo_28_1_261219.ScanId;v=1;d1=24568.24568.4	controllerType=0 controllerNumber=1 scan=24568	50.4868
38174:3	1	S.MP[+15.995]LPPHPGHPGYINFS[+79.966]YEVLTPL.K		P[+16], S[+80]	891.431	3	2672.28	2672.26	0	6.1	17	Non	219.26	219.26	5.8	3.19	1278	>sp|P02817|AMELX_BOVIN Amelogenin, X isoform OS=Bos taurus OX=9913 GN=AMELX PE=1 SV=2	1	hf1_10472_ebo_28_1_261219.ScanId;v=1;d1=27749.27749.3	controllerType=0 controllerNumber=1 scan=27749	56.1025
41547:3	1	S.MP[+15.995]LPPHPGHPGYINFS[+79.966]YEVLTPL.K		P[+16], S[+80]	891.431	3	2672.28	2672.26	0	5.7	17	Non	222.62	222.62	5.8	3.19	1278	>sp|P02817|AMELX_BOVIN Amelogenin, X isoform OS=Bos taurus OX=9913 GN=AMELX PE=1 SV=2	1	hf1_10472_ebo_28_1_261219.ScanId;v=1;d1=29969.29969.3	controllerType=0 controllerNumber=1 scan=29969	60.0471
00479:3	1	S.MP[+15.995]LPPHPGHPGYINFS[+79.966]YEVLTPL.K		P[+16], S[+80]	891.429	3	2672.27	2672.26	0	3.8	17	Non	223.93	223.93	5.8	2.97	1278	>sp|P02817|AMELX_BOVIN Amelogenin, X isoform OS=Bos taurus OX=9913 GN=AMELX PE=1 SV=2	1	hf1_10472_ebo_28_1_261219.ScanId;v=1;d1=1899.1899.3	controllerType=0 controllerNumber=1 scan=1899	10.1648
38473:3	1	S.MP[+15.995]LPPHPGHPGYINFS[+79.966]YEVLTPL.K		P[+16], S[+80]	891.43	3	2672.28	2672.26	0	5.5	17	Non	235.17	235.17	0.55	3.19	1278	>sp|P02817|AMELX_BOVIN Amelogenin, X isoform OS=Bos taurus OX=9913 GN=AMELX PE=1 SV=2	1	hf1_10472_ebo_28_1_261219.ScanId;v=1;d1=27947.27947.3	controllerType=0 controllerNumber=1 scan=27947	56.4571
32870:3	1	S.MP[+15.995]LPPHPGHPGYINFS[+79.966]YEVLTPL.K		P[+16], S[+80]	891.431	3	2672.28	2672.26	0	5.9	17	Non	240.41	240.41	5.8	4.22	1278	>sp|P02817|AMELX_BOVIN Amelogenin, X isoform OS=Bos taurus OX=9913 GN=AMELX PE=1 SV=2	1	hf1_10472_ebo_28_1_261219.ScanId;v=1;d1=24173.24173.3	controllerType=0 controllerNumber=1 scan=24173	49.7942
38757:3	1	S.MP[+15.995]LPPHPGHPGYINFS[+79.966]YEVLTPL.K		P[+16], S[+80]	891.431	3	2672.28	2672.26	0	6.5	17	Non	251.5	251.5	5.8	4.76	1278	>sp|P02817|AMELX_BOVIN Amelogenin, X isoform OS=Bos taurus OX=9913 GN=AMELX PE=1 SV=2	1	hf1_10472_ebo_28_1_261219.ScanId;v=1;d1=28142.28142.3	controllerType=0 controllerNumber=1 scan=28142	56.8038
34953:3	1	S.MP[+15.995]LPPHPGHPGYINFS[+79.966]YEVLTPL.K		P[+16], S[+80]	891.429	3	2672.27	2672.26	0	4.3	17	Non	265.34	265.34	5.8	4.26	1278	>sp|P02817|AMELX_BOVIN Amelogenin, X isoform OS=Bos taurus OX=9913 GN=AMELX PE=1 SV=2	1	hf1_10472_ebo_28_1_261219.ScanId;v=1;d1=25579.25579.3	controllerType=0 controllerNumber=1 scan=25579	52.2548
35235:3	1	S.MP[+15.995]LPPHPGHPGYINFS[+79.966]YEVLTPL.K		P[+16], S[+80]	891.43	3	2672.27	2672.26	0	4.8	17	Non	268.12	268.12	5.8	4.51	1278	>sp|P02817|AMELX_BOVIN Amelogenin, X isoform OS=Bos taurus OX=9913 GN=AMELX PE=1 SV=2	1	hf1_10472_ebo_28_1_261219.ScanId;v=1;d1=25772.25772.3	controllerType=0 controllerNumber=1 scan=25772	52.596
37284:3	1	S.MP[+15.995]LPPHPGHPGYINFS[+79.966]YEVLTPL.K		P[+16], S[+80]	891.431	3	2672.28	2672.26	0	5.7	17	Non	269.89	269.89	4.69	4.87	1278	>sp|P02817|AMELX_BOVIN Amelogenin, X isoform OS=Bos taurus OX=9913 GN=AMELX PE=1 SV=2	1	hf1_10472_ebo_28_1_261219.ScanId;v=1;d1=27161.27161.3	controllerType=0 controllerNumber=1 scan=27161	55.0606
35797:3	1	S.MP[+15.995]LPPHPGHPGYINFS[+79.966]YEVLTPL.K		P[+16], S[+80]	891.43	3	2672.27	2672.26	0	4.6	17	Non	270.55	270.55	5.8	4.51	1278	>sp|P02817|AMELX_BOVIN Amelogenin, X isoform OS=Bos taurus OX=9913 GN=AMELX PE=1 SV=2	1	hf1_10472_ebo_28_1_261219.ScanId;v=1;d1=26162.26162.3	controllerType=0 controllerNumber=1 scan=26162	53.2857
40883:3	1	S.MPLPPHPGHPGYINFS[+79.966]Y[+15.995]EVLTPL.K		S[+80], Y[+16]	891.432	3	2672.28	2672.26	0	7.6	17	Non	271.55	271.55	16.99	5.12	1278	>sp|P02817|AMELX_BOVIN Amelogenin, X isoform OS=Bos taurus OX=9913 GN=AMELX PE=1 SV=2	1	hf1_10472_ebo_28_1_261219.ScanId;v=1;d1=29542.29542.4	controllerType=0 controllerNumber=1 scan=29542	59.2883
35525:3	1	S.MP[+15.995]LPPHPGHPGYINFS[+79.966]YEVLTPL.K		P[+16], S[+80]	891.43	3	2672.27	2672.26	0	4.8	17	Non	273.86	273.86	4.78	4.51	1278	>sp|P02817|AMELX_BOVIN Amelogenin, X isoform OS=Bos taurus OX=9913 GN=AMELX PE=1 SV=2	1	hf1_10472_ebo_28_1_261219.ScanId;v=1;d1=25970.25970.3	controllerType=0 controllerNumber=1 scan=25970	52.9447
34021:2	1	S.M[+15.995]PLPPHPGHPGYINFS[+79.966]YEVLTPL.K		M[+16], S[+80]	1336.64	2	2672.28	2672.26	0	5.2	17	Non	275.98	275.98	6.01	5.06	1278	>sp|P02817|AMELX_BOVIN Amelogenin, X isoform OS=Bos taurus OX=9913 GN=AMELX PE=1 SV=2	1	hf1_10472_ebo_28_1_261219.ScanId;v=1;d1=24948.24948.2	controllerType=0 controllerNumber=1 scan=24948	51.1474
34049:3	1	S.MP[+15.995]LPPHPGHPGYINFS[+79.966]YEVLTPL.K		P[+16], S[+80]	891.429	3	2672.27	2672.26	0	3.7	17	Non	291.57	291.57	4	4.71	1278	>sp|P02817|AMELX_BOVIN Amelogenin, X isoform OS=Bos taurus OX=9913 GN=AMELX PE=1 SV=2	1	hf1_10472_ebo_28_1_261219.ScanId;v=1;d1=24966.24966.3	controllerType=0 controllerNumber=1 scan=24966	51.1793
33740:3	1	S.MP[+15.995]LPPHPGHPGYINFS[+79.966]YEVLTPL.K		P[+16], S[+80]	891.43	3	2672.28	2672.26	0	5	17	Non	295.64	295.64	4	5.19	1278	>sp|P02817|AMELX_BOVIN Amelogenin, X isoform OS=Bos taurus OX=9913 GN=AMELX PE=1 SV=2	1	hf1_10472_ebo_28_1_261219.ScanId;v=1;d1=24765.24765.3	controllerType=0 controllerNumber=1 scan=24765	50.8306
36075:3	1	S.MPLPPHPGHPGYIN[+0.984]FS[+79.966]YEVLTPL.K		N[+1], S[+80]	886.427	3	2657.27	2657.25	0	6.2	17	Non	318.71	318.71	111.04	4.96	1278	>sp|P02817|AMELX_BOVIN Amelogenin, X isoform OS=Bos taurus OX=9913 GN=AMELX PE=1 SV=2	1	hf1_10472_ebo_28_1_261219.ScanId;v=1;d1=26353.26353.3	controllerType=0 controllerNumber=1 scan=26353	53.633
33448:3	1	S.MP[+15.995]LPPHPGHPGYINFS[+79.966]YEVLTPL.K		P[+16], S[+80]	891.431	3	2672.28	2672.26	0	5.9	17	Non	321	321	4	5.43	1278	>sp|P02817|AMELX_BOVIN Amelogenin, X isoform OS=Bos taurus OX=9913 GN=AMELX PE=1 SV=2	1	hf1_10472_ebo_28_1_261219.ScanId;v=1;d1=24567.24567.3	controllerType=0 controllerNumber=1 scan=24567	50.4853
32643:3	1	S.MP[+15.995]LPPHPGHPGYIN[+0.984]FSYEVLTPL.K		N[+1], P[+16]	865.106	3	2593.3	2593.28	0	8.7	17	Non	346.89	346.89	5.8	4.98	1278	>sp|P02817|AMELX_BOVIN Amelogenin, X isoform OS=Bos taurus OX=9913 GN=AMELX PE=1 SV=2	1	hf1_10472_ebo_28_1_261219.ScanId;v=1;d1=24022.24022.3	controllerType=0 controllerNumber=1 scan=24022	49.5294
33160:3	1	S.MP[+15.995]LPPHPGHPGYINFS[+79.966]YEVLTPL.K		P[+16], S[+80]	891.431	3	2672.28	2672.26	0	5.9	17	Non	348.71	348.71	4	5.43	1278	>sp|P02817|AMELX_BOVIN Amelogenin, X isoform OS=Bos taurus OX=9913 GN=AMELX PE=1 SV=2	1	hf1_10472_ebo_28_1_261219.ScanId;v=1;d1=24370.24370.3	controllerType=0 controllerNumber=1 scan=24370	50.1388
34627:3	1	S.MP[+15.995]LPPHPGHPGYINFS[+79.966]YEVLTPL.K		P[+16], S[+80]	891.428	3	2672.27	2672.26	0	2.3	17	Non	349.44	349.44	5.8	4.31	1278	>sp|P02817|AMELX_BOVIN Amelogenin, X isoform OS=Bos taurus OX=9913 GN=AMELX PE=1 SV=2	1	hf1_10472_ebo_28_1_261219.ScanId;v=1;d1=25355.25355.3	controllerType=0 controllerNumber=1 scan=25355	51.8615
36364:3	1	S.MPLPPHPGHPGYIN[+0.984]FS[+79.966]YEVLTPL.K		N[+1], S[+80]	886.429	3	2657.27	2657.25	0	8	17	Non	368.86	368.86	79.47	6.62	1278	>sp|P02817|AMELX_BOVIN Amelogenin, X isoform OS=Bos taurus OX=9913 GN=AMELX PE=1 SV=2	1	hf1_10472_ebo_28_1_261219.ScanId;v=1;d1=26555.26555.3	controllerType=0 controllerNumber=1 scan=26555	53.9916
33121:2	1	S.M[+15.995]PLPPHPGHPGYINFS[+79.966]YEVLTPL.K		M[+16], S[+80]	1336.65	2	2672.29	2672.26	0	9.5	17	Non	389.55	389.55	8.17	6.05	1278	>sp|P02817|AMELX_BOVIN Amelogenin, X isoform OS=Bos taurus OX=9913 GN=AMELX PE=1 SV=2	1	hf1_10472_ebo_28_1_261219.ScanId;v=1;d1=24343.24343.2	controllerType=0 controllerNumber=1 scan=24343	50.0901
35794:3	1	S.MPLPPHPGHPGYIN[+0.984]FS[+79.966]YEVLTPL.K		N[+1], S[+80]	886.429	3	2657.27	2657.25	0	8.4	17	Non	413.21	413.21	109.42	5.95	1278	>sp|P02817|AMELX_BOVIN Amelogenin, X isoform OS=Bos taurus OX=9913 GN=AMELX PE=1 SV=2	1	hf1_10472_ebo_28_1_261219.ScanId;v=1;d1=26159.26159.3	controllerType=0 controllerNumber=1 scan=26159	53.2784
33710:2	1	S.M[+15.995]PLPPHPGHPGYINFS[+79.966]YEVLTPL.K		M[+16], S[+80]	1336.64	2	2672.28	2672.26	0	7.7	17	Non	430.09	430.09	5.36	6.61	1278	>sp|P02817|AMELX_BOVIN Amelogenin, X isoform OS=Bos taurus OX=9913 GN=AMELX PE=1 SV=2	1	hf1_10472_ebo_28_1_261219.ScanId;v=1;d1=24745.24745.2	controllerType=0 controllerNumber=1 scan=24745	50.7949
33416:2	1	S.M[+15.995]PLPPHPGHPGYINFS[+79.966]YEVLTPL.K		M[+16], S[+80]	1336.65	2	2672.28	2672.26	0	8.2	17	Non	471.26	471.26	19.81	6.77	1278	>sp|P02817|AMELX_BOVIN Amelogenin, X isoform OS=Bos taurus OX=9913 GN=AMELX PE=1 SV=2	1	hf1_10472_ebo_28_1_261219.ScanId;v=1;d1=24545.24545.2	controllerType=0 controllerNumber=1 scan=24545	50.4467
45991:3	1	S.MPLPPHPGHPGY[+15.995]INF[+31.990]SY[+31.990]EVLTPL.K		F[+32], Y[+16][+32]	886.099	3	2656.28	2656.28	0	2.4	17	Non	24.38	24.38	0	1.2	1278	>sp|P02817|AMELX_BOVIN Amelogenin, X isoform OS=Bos taurus OX=9913 GN=AMELX PE=1 SV=2	1	hf1_10472_ebo_28_1_261219.ScanId;v=1;d1=32971.32971.3	controllerType=0 controllerNumber=1 scan=32971	65.479
45800:3	1	S.MPLPPHPGHP[+31.990]GY[+15.995]INF[+31.990]SYEVLTPL.K		F[+32], P[+32], Y[+16]	886.098	3	2656.28	2656.28	0	2.2	17	Non	29.84	29.84	0	0.93	1278	>sp|P02817|AMELX_BOVIN Amelogenin, X isoform OS=Bos taurus OX=9913 GN=AMELX PE=1 SV=2	1	hf1_10472_ebo_28_1_261219.ScanId;v=1;d1=32805.32805.3	controllerType=0 controllerNumber=1 scan=32805	65.1364
46177:3	1	S.MPLPPHPGHP[+31.990]GY[+31.990]INF[+15.995]SYEVLTPL.K		F[+16], P[+32], Y[+32]	886.098	3	2656.28	2656.28	0	2.1	17	Non	55.01	55.01	0.24	0.93	1278	>sp|P02817|AMELX_BOVIN Amelogenin, X isoform OS=Bos taurus OX=9913 GN=AMELX PE=1 SV=2	1	hf1_10472_ebo_28_1_261219.ScanId;v=1;d1=33128.33128.3	controllerType=0 controllerNumber=1 scan=33128	65.8334
46534:3	1	S.MPLPPHPGHP[+31.990]GY[+31.990]INF[+15.995]SYEVLTPL.K		F[+16], P[+32], Y[+32]	886.097	3	2656.28	2656.28	0	0	17	Non	72.13	72.13	0.24	2.16	1278	>sp|P02817|AMELX_BOVIN Amelogenin, X isoform OS=Bos taurus OX=9913 GN=AMELX PE=1 SV=2	1	hf1_10472_ebo_28_1_261219.ScanId;v=1;d1=33446.33446.3	controllerType=0 controllerNumber=1 scan=33446	66.5524
33085:3	1	S.MP[+15.995]LPPHPGHP[+15.995]GYINFS[+79.966]YEVLTPL.K		P[+16]*2, S[+80]	896.762	3	2688.27	2688.26	0	5	17	Non	83.31	83.31	2.66	1.01	1278	>sp|P02817|AMELX_BOVIN Amelogenin, X isoform OS=Bos taurus OX=9913 GN=AMELX PE=1 SV=2	1	hf1_10472_ebo_28_1_261219.ScanId;v=1;d1=24317.24317.3	controllerType=0 controllerNumber=1 scan=24317	50.0454
41059:3	1	S.MPLPPHPGHP[+31.990]GY[+15.995]INF[+31.990]SYEVLTPL.K		F[+32], P[+32], Y[+16]	886.091	3	2656.26	2656.28	0	-6.9	17	Non	117.33	117.33	1.4	0.92	1278	>sp|P02817|AMELX_BOVIN Amelogenin, X isoform OS=Bos taurus OX=9913 GN=AMELX PE=1 SV=2	1	hf1_10472_ebo_28_1_261219.ScanId;v=1;d1=29653.29653.3	controllerType=0 controllerNumber=1 scan=29653	59.4849
45188:3	1	S.MPLPPHPGHPGY[+31.990]INF[+31.990]SY[+15.995]EVLTPL.K		F[+32], Y[+16][+32]	886.1	3	2656.28	2656.28	0	3.6	17	Non	118.02	118.02	0	1.83	1278	>sp|P02817|AMELX_BOVIN Amelogenin, X isoform OS=Bos taurus OX=9913 GN=AMELX PE=1 SV=2	1	hf1_10472_ebo_28_1_261219.ScanId;v=1;d1=32349.32349.3	controllerType=0 controllerNumber=1 scan=32349	64.2878
32783:3	1	S.MP[+15.995]LPPHPGHP[+15.995]GYINFS[+79.966]YEVLTPL.K		P[+16]*2, S[+80]	896.763	3	2688.27	2688.26	0	6.4	17	Non	127.57	127.57	5.8	2.27	1278	>sp|P02817|AMELX_BOVIN Amelogenin, X isoform OS=Bos taurus OX=9913 GN=AMELX PE=1 SV=2	1	hf1_10472_ebo_28_1_261219.ScanId;v=1;d1=24112.24112.3	controllerType=0 controllerNumber=1 scan=24112	49.6855
43762:3	1	S.MPLPPHPGHP[+31.990]GY[+15.995]INF[+31.990]SYEVLTPL.K		F[+32], P[+32], Y[+16]	886.1	3	2656.28	2656.28	0	3.5	17	Non	151.78	151.78	0.54	2.19	1278	>sp|P02817|AMELX_BOVIN Amelogenin, X isoform OS=Bos taurus OX=9913 GN=AMELX PE=1 SV=2	1	hf1_10472_ebo_28_1_261219.ScanId;v=1;d1=31415.31415.3	controllerType=0 controllerNumber=1 scan=31415	62.6244
36099:3	1	S.MPLPPHPGHPGY[+31.990]INF[+31.990]SY[+15.995]EVLTPL.K		F[+32], Y[+16][+32]	886.094	3	2656.27	2656.28	0	-3.2	17	Non	158.45	158.45	0	1.11	1278	>sp|P02817|AMELX_BOVIN Amelogenin, X isoform OS=Bos taurus OX=9913 GN=AMELX PE=1 SV=2	1	hf1_10472_ebo_28_1_261219.ScanId;v=1;d1=26371.26371.3	controllerType=0 controllerNumber=1 scan=26371	53.6659
39117:3	1	S.MPLPPHPGHP[+31.990]GY[+15.995]INF[+31.990]SYEVLTPL.K		F[+32], P[+32], Y[+16]	886.098	3	2656.28	2656.28	0	1.9	17	Non	159.42	159.42	5.3	1.22	1278	>sp|P02817|AMELX_BOVIN Amelogenin, X isoform OS=Bos taurus OX=9913 GN=AMELX PE=1 SV=2	1	hf1_10472_ebo_28_1_261219.ScanId;v=1;d1=28374.28374.3	controllerType=0 controllerNumber=1 scan=28374	57.2142
34116:3	1	S.MP[+15.995]LPPHPGHPGYIN[+0.984]FS[+79.966]YEVLTPL.K		N[+1], P[+16], S[+80]	891.761	3	2673.27	2673.25	0	8.1	17	Non	196.15	7.11	2.46	2.16	1278	>sp|P02817|AMELX_BOVIN Amelogenin, X isoform OS=Bos taurus OX=9913 GN=AMELX PE=1 SV=2	1	hf1_10472_ebo_28_1_261219.ScanId;v=1;d1=25012.25012.4	controllerType=0 controllerNumber=1 scan=25012	51.2598
36960:3	1	S.MPLPPHPGHP[+31.990]GY[+31.990]INF[+15.995]SYEVLTPL.K		F[+16], P[+32], Y[+32]	886.103	3	2656.3	2656.28	0	7.6	17	Non	235.6	235.6	0.24	3.43	1278	>sp|P02817|AMELX_BOVIN Amelogenin, X isoform OS=Bos taurus OX=9913 GN=AMELX PE=1 SV=2	1	hf1_10472_ebo_28_1_261219.ScanId;v=1;d1=26950.26950.3	controllerType=0 controllerNumber=1 scan=26950	54.6897
34050:3	1	S.MP[+15.995]LPPHPGHPGYIN[+0.984]FS[+79.966]YEVLTPL.K		N[+1], P[+16], S[+80]	891.762	3	2673.27	2673.25	0	9.2	17	Non	302.19	302.19	4	4.51	1278	>sp|P02817|AMELX_BOVIN Amelogenin, X isoform OS=Bos taurus OX=9913 GN=AMELX PE=1 SV=2	1	hf1_10472_ebo_28_1_261219.ScanId;v=1;d1=24966.24966.3	controllerType=0 controllerNumber=1 scan=24966	51.1793
32661:3	1	S.MP[+15.995]LPPHP[+15.995]GHPGYINFS[+79.966]YEVLTPL.K		P[+16]*2, S[+80]	896.763	3	2688.27	2688.26	0	6.5	17	Non	305.05	305.05	2.32	5.21	1278	>sp|P02817|AMELX_BOVIN Amelogenin, X isoform OS=Bos taurus OX=9913 GN=AMELX PE=1 SV=2	1	hf1_10472_ebo_28_1_261219.ScanId;v=1;d1=24033.24033.3	controllerType=0 controllerNumber=1 scan=24033	49.5487
34338:3	1	S.MP[+15.995]LPPHPGHPGYIN[+0.984]FS[+79.966]YEVLTPL.K		N[+1], P[+16], S[+80]	891.76	3	2673.27	2673.25	0	7.6	17	Non	317.08	317.08	4	5.21	1278	>sp|P02817|AMELX_BOVIN Amelogenin, X isoform OS=Bos taurus OX=9913 GN=AMELX PE=1 SV=2	1	hf1_10472_ebo_28_1_261219.ScanId;v=1;d1=25161.25161.3	controllerType=0 controllerNumber=1 scan=25161	51.5224
49387:3	1	S.MP[+15.995]LPPHPGHP[+31.990]GY[+31.990]INFSY[+15.995]EVLTPL.K		P[+16][+32], Y[+16][+32]	891.432	3	2672.28	2672.27	0	4.3	17	Non	18.69	18.69	0	2.19	1278	>sp|P02817|AMELX_BOVIN Amelogenin, X isoform OS=Bos taurus OX=9913 GN=AMELX PE=1 SV=2	1	hf1_10472_ebo_28_1_261219.ScanId;v=1;d1=36106.36106.3	controllerType=0 controllerNumber=1 scan=36106	74.2089
46484:3	1	S.MP[+15.995]LPPHPGHP[+31.990]GY[+31.990]INFSY[+15.995]EVLTPL.K		P[+16][+32], Y[+16][+32]	891.43	3	2672.28	2672.27	0	1.8	17	Non	52.4	52.4	0	2.17	1278	>sp|P02817|AMELX_BOVIN Amelogenin, X isoform OS=Bos taurus OX=9913 GN=AMELX PE=1 SV=2	1	hf1_10472_ebo_28_1_261219.ScanId;v=1;d1=33406.33406.3	controllerType=0 controllerNumber=1 scan=33406	66.4564
49234:3	1	S.MP[+15.995]LPPHPGHP[+31.990]GY[+31.990]INFSY[+15.995]EVLTPL.K		P[+16][+32], Y[+16][+32]	891.432	3	2672.28	2672.27	0	4.3	17	Non	52.86	52.86	0	2.19	1278	>sp|P02817|AMELX_BOVIN Amelogenin, X isoform OS=Bos taurus OX=9913 GN=AMELX PE=1 SV=2	1	hf1_10472_ebo_28_1_261219.ScanId;v=1;d1=35983.35983.3	controllerType=0 controllerNumber=1 scan=35983	73.8631
45952:3	1	S.MP[+15.995]LPPHPGHP[+31.990]GY[+31.990]INFSY[+15.995]EVLTPL.K		P[+16][+32], Y[+16][+32]	891.431	3	2672.28	2672.27	0	3.4	17	Non	68.33	68.33	0	2.24	1278	>sp|P02817|AMELX_BOVIN Amelogenin, X isoform OS=Bos taurus OX=9913 GN=AMELX PE=1 SV=2	1	hf1_10472_ebo_28_1_261219.ScanId;v=1;d1=32942.32942.3	controllerType=0 controllerNumber=1 scan=32942	65.4167
00174:3	1	S.MP[+15.995]LPPHPGHP[+31.990]GY[+31.990]INFSY[+15.995]EVLTPL.K		P[+16][+32], Y[+16][+32]	891.43	3	2672.28	2672.27	0	1.9	17	Non	69.42	69.42	0	2.17	1278	>sp|P02817|AMELX_BOVIN Amelogenin, X isoform OS=Bos taurus OX=9913 GN=AMELX PE=1 SV=2	1	hf1_10472_ebo_28_1_261219.ScanId;v=1;d1=637.637.3	controllerType=0 controllerNumber=1 scan=637	3.3494
43167:3	1	S.MP[+15.995]LPPHPGH[+15.995]PGYINF[+31.990]SY[+31.990]EVLTPL.K		F[+32], H[+16], P[+16], Y[+32]	891.431	3	2672.28	2672.27	0	3.4	17	Non	74.36	74.36	4.11	1.08	1278	>sp|P02817|AMELX_BOVIN Amelogenin, X isoform OS=Bos taurus OX=9913 GN=AMELX PE=1 SV=2	1	hf1_10472_ebo_28_1_261219.ScanId;v=1;d1=31028.31028.4	controllerType=0 controllerNumber=1 scan=31028	61.933
46321:3	1	S.MP[+15.995]LPPHPGHP[+31.990]GY[+31.990]INFSY[+15.995]EVLTPL.K		P[+16][+32], Y[+16][+32]	891.429	3	2672.27	2672.27	0	1.2	17	Non	82.14	82.14	0	2.17	1278	>sp|P02817|AMELX_BOVIN Amelogenin, X isoform OS=Bos taurus OX=9913 GN=AMELX PE=1 SV=2	1	hf1_10472_ebo_28_1_261219.ScanId;v=1;d1=33260.33260.3	controllerType=0 controllerNumber=1 scan=33260	66.1129
32349:3	1	S.MP[+15.995]LPPHPGHP[+31.990]GY[+15.995]INFSY[+31.990]EVLTPL.K		P[+16][+32], Y[+16][+32]	891.43	3	2672.27	2672.27	0	1.6	17	Non	88.13	88.13	3.6	1.02	1278	>sp|P02817|AMELX_BOVIN Amelogenin, X isoform OS=Bos taurus OX=9913 GN=AMELX PE=1 SV=2	1	hf1_10472_ebo_28_1_261219.ScanId;v=1;d1=23827.23827.3	controllerType=0 controllerNumber=1 scan=23827	49.1876
41401:3	1	S.MP[+15.995]LPPHPGHP[+15.995]GY[+31.990]INF[+31.990]SYEVLTPL.K		F[+32], P[+16]*2, Y[+32]	891.432	3	2672.28	2672.27	0	3.7	17	Non	105.76	105.76	5.8	1.83	1278	>sp|P02817|AMELX_BOVIN Amelogenin, X isoform OS=Bos taurus OX=9913 GN=AMELX PE=1 SV=2	1	hf1_10472_ebo_28_1_261219.ScanId;v=1;d1=29872.29872.3	controllerType=0 controllerNumber=1 scan=29872	59.8742
36100:3	1	S.MPLPPHPGHP[+31.990]GYIN[+0.984]F[+31.990]SY[+15.995]EVLTPL.K		F[+32], N[+1], P[+32], Y[+16]	886.428	3	2657.27	2657.26	0	3.2	17	Non	109.09	109.09	0	0.96	1278	>sp|P02817|AMELX_BOVIN Amelogenin, X isoform OS=Bos taurus OX=9913 GN=AMELX PE=1 SV=2	1	hf1_10472_ebo_28_1_261219.ScanId;v=1;d1=26371.26371.3	controllerType=0 controllerNumber=1 scan=26371	53.6659
45533:3	1	S.MP[+15.995]LPPHPGHP[+31.990]GY[+31.990]INF[+15.995]SYEVLTPL.K		F[+16], P[+16][+32], Y[+32]	891.43	3	2672.28	2672.27	0	2.4	17	Non	133.17	133.17	0.24	2.29	1278	>sp|P02817|AMELX_BOVIN Amelogenin, X isoform OS=Bos taurus OX=9913 GN=AMELX PE=1 SV=2	1	hf1_10472_ebo_28_1_261219.ScanId;v=1;d1=32591.32591.3	controllerType=0 controllerNumber=1 scan=32591	64.7215
43071:3	1	S.MP[+15.995]LPPHPGHP[+31.990]GY[+31.990]INFSY[+15.995]EVLTPL.K		P[+16][+32], Y[+16][+32]	891.432	3	2672.28	2672.27	0	4.5	17	Non	138.6	138.6	0.24	2.52	1278	>sp|P02817|AMELX_BOVIN Amelogenin, X isoform OS=Bos taurus OX=9913 GN=AMELX PE=1 SV=2	1	hf1_10472_ebo_28_1_261219.ScanId;v=1;d1=30969.30969.3	controllerType=0 controllerNumber=1 scan=30969	61.8287
43384:3	1	S.MP[+15.995]LPPHPGHP[+31.990]GYINF[+31.990]SY[+15.995]EVLTPL.K		F[+32], P[+16][+32], Y[+16]	891.431	3	2672.28	2672.27	0	3	17	Non	140.7	140.7	1.38	2.39	1278	>sp|P02817|AMELX_BOVIN Amelogenin, X isoform OS=Bos taurus OX=9913 GN=AMELX PE=1 SV=2	1	hf1_10472_ebo_28_1_261219.ScanId;v=1;d1=31167.31167.3	controllerType=0 controllerNumber=1 scan=31167	62.1816
39363:3	1	S.MP[+15.995]LPPHPGHP[+15.995]GY[+31.990]INF[+31.990]SYEVLTPL.K		F[+32], P[+16]*2, Y[+32]	891.43	3	2672.28	2672.27	0	2.3	17	Non	161.88	161.88	1.21	1.22	1278	>sp|P02817|AMELX_BOVIN Amelogenin, X isoform OS=Bos taurus OX=9913 GN=AMELX PE=1 SV=2	1	hf1_10472_ebo_28_1_261219.ScanId;v=1;d1=28538.28538.3	controllerType=0 controllerNumber=1 scan=28538	57.5069
40543:3	1	S.MP[+15.995]LPPHPGHP[+31.990]GY[+15.995]INF[+31.990]SYEVLTPL.K		F[+32], P[+16][+32], Y[+16]	891.431	3	2672.28	2672.27	0	3.6	17	Non	196.71	196.71	2	2.82	1278	>sp|P02817|AMELX_BOVIN Amelogenin, X isoform OS=Bos taurus OX=9913 GN=AMELX PE=1 SV=2	1	hf1_10472_ebo_28_1_261219.ScanId;v=1;d1=29310.29310.3	controllerType=0 controllerNumber=1 scan=29310	58.8764
36961:3	1	S.MPLPPHPGHP[+31.990]GY[+15.995]IN[+0.984]F[+31.990]SYEVLTPL.K		F[+32], N[+1], P[+32], Y[+16]	886.433	3	2657.28	2657.26	0	9.4	17	Non	226.18	226.18	1.2	2.81	1278	>sp|P02817|AMELX_BOVIN Amelogenin, X isoform OS=Bos taurus OX=9913 GN=AMELX PE=1 SV=2	1	hf1_10472_ebo_28_1_261219.ScanId;v=1;d1=26950.26950.3	controllerType=0 controllerNumber=1 scan=26950	54.6897
25736:4	1	S.MPLPPHPGHPGYINFSYEVLTPLK.W			676.859	4	2704.41	2704.4	0	6.3	17	NRagged	216.52	216.52	216.52	4.59	1278	>sp|P02817|AMELX_BOVIN Amelogenin, X isoform OS=Bos taurus OX=9913 GN=AMELX PE=1 SV=2	1	hf1_10472_ebo_28_1_261219.ScanId;v=1;d1=19313.19313.4	controllerType=0 controllerNumber=1 scan=19313	41.363
31438:4	1	S.MPLPPHPGHPGYINFSYEVLTPLK.W			676.851	4	2704.38	2704.4	0	-5.6	17	NRagged	301.86	301.86	301.86	4.61	1278	>sp|P02817|AMELX_BOVIN Amelogenin, X isoform OS=Bos taurus OX=9913 GN=AMELX PE=1 SV=2	1	hf1_10472_ebo_28_1_261219.ScanId;v=1;d1=23193.23193.4	controllerType=0 controllerNumber=1 scan=23193	48.079
30283:4	1	S.MPLPPHPGHPGYINFSYEVLTPLK.W			676.853	4	2704.39	2704.4	0	-2.4	17	NRagged	414.89	368.97	368.97	6.42	1278	>sp|P02817|AMELX_BOVIN Amelogenin, X isoform OS=Bos taurus OX=9913 GN=AMELX PE=1 SV=2	1	hf1_10472_ebo_28_1_261219.ScanId;v=1;d1=22395.22395.4	controllerType=0 controllerNumber=1 scan=22395	46.6953
31140:4	1	S.MPLPPHPGHPGYINFSYEVLTPLK.W			676.858	4	2704.41	2704.4	0	4.8	17	NRagged	428.04	428.04	428.04	7.42	1278	>sp|P02817|AMELX_BOVIN Amelogenin, X isoform OS=Bos taurus OX=9913 GN=AMELX PE=1 SV=2	1	hf1_10472_ebo_28_1_261219.ScanId;v=1;d1=22988.22988.4	controllerType=0 controllerNumber=1 scan=22988	47.7254
47606:3	1	S.MPLPPHPGHPGYINFS[+79.966]YEVLTPLK.W		S[+80]	928.796	3	2784.37	2784.36	0	4.3	17	NRagged	28.75	28.75	2.09	2.36	1278	>sp|P02817|AMELX_BOVIN Amelogenin, X isoform OS=Bos taurus OX=9913 GN=AMELX PE=1 SV=2	1	hf1_10472_ebo_28_1_261219.ScanId;v=1;d1=34413.34413.3	controllerType=0 controllerNumber=1 scan=34413	69.2337
46627:3	1	S.MPLPPHPGHPGYINFS[+79.966]YEVLTPLK.W		S[+80]	928.794	3	2784.37	2784.36	0	2.4	17	NRagged	41.26	41.26	33.06	2.35	1278	>sp|P02817|AMELX_BOVIN Amelogenin, X isoform OS=Bos taurus OX=9913 GN=AMELX PE=1 SV=2	1	hf1_10472_ebo_28_1_261219.ScanId;v=1;d1=33538.33538.3	controllerType=0 controllerNumber=1 scan=33538	66.8235
49405:3	1	S.MPLPPHPGHPGYINFS[+79.966]YEVLTPLK.W		S[+80]	928.8	3	2784.39	2784.36	0	8.7	17	NRagged	85.47	85.47	32.4	2.71	1278	>sp|P02817|AMELX_BOVIN Amelogenin, X isoform OS=Bos taurus OX=9913 GN=AMELX PE=1 SV=2	1	hf1_10472_ebo_28_1_261219.ScanId;v=1;d1=36120.36120.3	controllerType=0 controllerNumber=1 scan=36120	74.2368
38496:4	1	S.MPLPPHPGHPGYINFS[+79.966]YEVLTPLK.W		S[+80]	696.849	4	2784.37	2784.36	0	4.6	17	NRagged	96.51	96.51	7.8	2.33	1278	>sp|P02817|AMELX_BOVIN Amelogenin, X isoform OS=Bos taurus OX=9913 GN=AMELX PE=1 SV=2	1	hf1_10472_ebo_28_1_261219.ScanId;v=1;d1=27963.27963.2	controllerType=0 controllerNumber=1 scan=27963	56.4865
40048:3	1	S.MPLPPHPGHPGYINFS[+79.966]YEVLTPLK.W		S[+80]	928.797	3	2784.38	2784.36	0	5.6	17	NRagged	102.52	102.52	16.73	2.31	1278	>sp|P02817|AMELX_BOVIN Amelogenin, X isoform OS=Bos taurus OX=9913 GN=AMELX PE=1 SV=2	1	hf1_10472_ebo_28_1_261219.ScanId;v=1;d1=28981.28981.3	controllerType=0 controllerNumber=1 scan=28981	58.2926
47574:4	1	S.MPLPPHPGHPGYINFS[+79.966]YEVLTPLK.W		S[+80]	696.849	4	2784.38	2784.36	0	4.8	17	NRagged	114.61	114.61	22.83	3.12	1278	>sp|P02817|AMELX_BOVIN Amelogenin, X isoform OS=Bos taurus OX=9913 GN=AMELX PE=1 SV=2	1	hf1_10472_ebo_28_1_261219.ScanId;v=1;d1=34385.34385.4	controllerType=0 controllerNumber=1 scan=34385	69.1692
38775:4	1	S.MPLPPHPGHPGYINFS[+79.966]YEVLTPLK.W		S[+80]	696.851	4	2784.38	2784.36	0	7.8	17	NRagged	137.41	137.41	9.95	3.75	1278	>sp|P02817|AMELX_BOVIN Amelogenin, X isoform OS=Bos taurus OX=9913 GN=AMELX PE=1 SV=2	1	hf1_10472_ebo_28_1_261219.ScanId;v=1;d1=28151.28151.4	controllerType=0 controllerNumber=1 scan=28151	56.8175
46368:4	1	S.MPLPPHPGHPGYINFS[+79.966]YEVLTPLK.W		S[+80]	696.849	4	2784.37	2784.36	0	4.6	17	NRagged	195.16	195.16	37.38	4.18	1278	>sp|P02817|AMELX_BOVIN Amelogenin, X isoform OS=Bos taurus OX=9913 GN=AMELX PE=1 SV=2	1	hf1_10472_ebo_28_1_261219.ScanId;v=1;d1=33303.33303.4	controllerType=0 controllerNumber=1 scan=33303	66.2106
29662:4	1	S.MPLPPHPGHPGYINFS[+79.966]YEVLTPLK.W		S[+80]	696.844	4	2784.35	2784.36	0	-2.8	17	NRagged	211.02	211.02	11.65	3.05	1278	>sp|P02817|AMELX_BOVIN Amelogenin, X isoform OS=Bos taurus OX=9913 GN=AMELX PE=1 SV=2	1	hf1_10472_ebo_28_1_261219.ScanId;v=1;d1=21978.21978.4	controllerType=0 controllerNumber=1 scan=21978	45.9719
41118:4	1	S.MPLPPHPGHPGYINFS[+79.966]YEVLTPLK.W		S[+80]	696.849	4	2784.38	2784.36	0	5	17	NRagged	216.02	216.02	9.5	4.36	1278	>sp|P02817|AMELX_BOVIN Amelogenin, X isoform OS=Bos taurus OX=9913 GN=AMELX PE=1 SV=2	1	hf1_10472_ebo_28_1_261219.ScanId;v=1;d1=29692.29692.4	controllerType=0 controllerNumber=1 scan=29692	59.5555
37112:3	1	S.MPLPPHPGHPGYINFS[+79.966]YEVLTPLK.W		S[+80]	928.799	3	2784.38	2784.36	0	7.4	17	NRagged	218.86	218.86	53.85	4.21	1278	>sp|P02817|AMELX_BOVIN Amelogenin, X isoform OS=Bos taurus OX=9913 GN=AMELX PE=1 SV=2	1	hf1_10472_ebo_28_1_261219.ScanId;v=1;d1=27051.27051.3	controllerType=0 controllerNumber=1 scan=27051	54.8668
46011:4	1	S.MPLPPHPGHPGYINFS[+79.966]YEVLTPLK.W		S[+80]	696.85	4	2784.38	2784.36	0	5.6	17	NRagged	224.75	224.75	10.17	4.59	1278	>sp|P02817|AMELX_BOVIN Amelogenin, X isoform OS=Bos taurus OX=9913 GN=AMELX PE=1 SV=2	1	hf1_10472_ebo_28_1_261219.ScanId;v=1;d1=32989.32989.4	controllerType=0 controllerNumber=1 scan=32989	65.5149
37412:3	1	S.MPLPPHPGHPGYINFS[+79.966]YEVLTPLK.W		S[+80]	928.798	3	2784.38	2784.36	0	6.8	17	NRagged	224.78	224.78	34.46	4.21	1278	>sp|P02817|AMELX_BOVIN Amelogenin, X isoform OS=Bos taurus OX=9913 GN=AMELX PE=1 SV=2	1	hf1_10472_ebo_28_1_261219.ScanId;v=1;d1=27246.27246.3	controllerType=0 controllerNumber=1 scan=27246	55.2109
46496:3	1	S.MPLPPHPGHPGYINFS[+79.966]YEVLTPLK.W		S[+80]	928.798	3	2784.38	2784.36	0	5.8	17	NRagged	227.41	227.41	83.15	4.78	1278	>sp|P02817|AMELX_BOVIN Amelogenin, X isoform OS=Bos taurus OX=9913 GN=AMELX PE=1 SV=2	1	hf1_10472_ebo_28_1_261219.ScanId;v=1;d1=33417.33417.3	controllerType=0 controllerNumber=1 scan=33417	66.4816
00736:4	1	S.MPLPPHPGHPGYINFS[+79.966]YEVLTPLK.W		S[+80]	696.848	4	2784.37	2784.36	0	2.3	17	NRagged	233.64	233.64	80.1	3.49	1278	>sp|P02817|AMELX_BOVIN Amelogenin, X isoform OS=Bos taurus OX=9913 GN=AMELX PE=1 SV=2	1	hf1_10472_ebo_28_1_261219.ScanId;v=1;d1=2140.2140.4	controllerType=0 controllerNumber=1 scan=2140	10.8889
37296:4	1	S.MPLPPHPGHPGYINFS[+79.966]YEVLTPLK.W		S[+80]	696.85	4	2784.38	2784.36	0	5.5	17	NRagged	235.63	235.63	66.66	4.36	1278	>sp|P02817|AMELX_BOVIN Amelogenin, X isoform OS=Bos taurus OX=9913 GN=AMELX PE=1 SV=2	1	hf1_10472_ebo_28_1_261219.ScanId;v=1;d1=27170.27170.4	controllerType=0 controllerNumber=1 scan=27170	55.0769
46196:4	1	S.MPLPPHPGHPGYINFS[+79.966]YEVLTPLK.W		S[+80]	696.849	4	2784.38	2784.36	0	4.9	17	NRagged	243.7	243.7	81.1	6.13	1278	>sp|P02817|AMELX_BOVIN Amelogenin, X isoform OS=Bos taurus OX=9913 GN=AMELX PE=1 SV=2	1	hf1_10472_ebo_28_1_261219.ScanId;v=1;d1=33144.33144.4	controllerType=0 controllerNumber=1 scan=33144	65.866
38210:4	1	S.MPLPPHPGHPGYINFS[+79.966]YEVLTPLK.W		S[+80]	696.85	4	2784.38	2784.36	0	5.9	17	NRagged	252.69	252.69	77.62	5.71	1278	>sp|P02817|AMELX_BOVIN Amelogenin, X isoform OS=Bos taurus OX=9913 GN=AMELX PE=1 SV=2	1	hf1_10472_ebo_28_1_261219.ScanId;v=1;d1=27772.27772.4	controllerType=0 controllerNumber=1 scan=27772	56.1429
45975:3	1	S.MPLPPHPGHPGYINFS[+79.966]YEVLTPLK.W		S[+80]	928.798	3	2784.38	2784.36	0	6.5	17	NRagged	269.58	269.58	109.34	7.01	1278	>sp|P02817|AMELX_BOVIN Amelogenin, X isoform OS=Bos taurus OX=9913 GN=AMELX PE=1 SV=2	1	hf1_10472_ebo_28_1_261219.ScanId;v=1;d1=32959.32959.3	controllerType=0 controllerNumber=1 scan=32959	65.4551
45792:3	1	S.MPLPPHPGHPGYINFS[+79.966]YEVLTPLK.W		S[+80]	928.797	3	2784.38	2784.36	0	5.4	17	NRagged	290.47	290.47	84.63	6.84	1278	>sp|P02817|AMELX_BOVIN Amelogenin, X isoform OS=Bos taurus OX=9913 GN=AMELX PE=1 SV=2	1	hf1_10472_ebo_28_1_261219.ScanId;v=1;d1=32797.32797.3	controllerType=0 controllerNumber=1 scan=32797	65.1185
40523:4	1	S.MPLPPHPGHPGYINFS[+79.966]YEVLTPLK.W		S[+80]	696.851	4	2784.38	2784.36	0	7.1	17	NRagged	293.15	293.15	78.11	6.47	1278	>sp|P02817|AMELX_BOVIN Amelogenin, X isoform OS=Bos taurus OX=9913 GN=AMELX PE=1 SV=2	1	hf1_10472_ebo_28_1_261219.ScanId;v=1;d1=29295.29295.4	controllerType=0 controllerNumber=1 scan=29295	58.8507
29499:4	1	S.MP[+15.995]LPPHPGHPGYINFSYEVLTPLK.W		P[+16]	680.856	4	2720.4	2720.39	0	4.4	17	NRagged	296.14	296.14	5.8	5.96	1278	>sp|P02817|AMELX_BOVIN Amelogenin, X isoform OS=Bos taurus OX=9913 GN=AMELX PE=1 SV=2	1	hf1_10472_ebo_28_1_261219.ScanId;v=1;d1=21870.21870.4	controllerType=0 controllerNumber=1 scan=21870	45.7832
29156:4	1	S.MPLPPHPGHPGYINFS[+79.966]YEVLTPLK.W		S[+80]	696.841	4	2784.34	2784.36	0	-6.9	17	NRagged	298.22	298.22	92.11	4.61	1278	>sp|P02817|AMELX_BOVIN Amelogenin, X isoform OS=Bos taurus OX=9913 GN=AMELX PE=1 SV=2	1	hf1_10472_ebo_28_1_261219.ScanId;v=1;d1=21634.21634.4	controllerType=0 controllerNumber=1 scan=21634	45.3751
00177:3	1	S.MPLPPHPGHPGYINFS[+79.966]YEVLTPLK.W		S[+80]	928.795	3	2784.37	2784.36	0	2.6	17	NRagged	301.69	301.69	134.54	5.97	1278	>sp|P02817|AMELX_BOVIN Amelogenin, X isoform OS=Bos taurus OX=9913 GN=AMELX PE=1 SV=2	1	hf1_10472_ebo_28_1_261219.ScanId;v=1;d1=639.639.3	controllerType=0 controllerNumber=1 scan=639	3.3523
43559:4	1	S.MPLPPHPGHPGYINFS[+79.966]YEVLTPLK.W		S[+80]	696.85	4	2784.38	2784.36	0	6.4	17	NRagged	310.38	310.38	140.91	7.15	1278	>sp|P02817|AMELX_BOVIN Amelogenin, X isoform OS=Bos taurus OX=9913 GN=AMELX PE=1 SV=2	1	hf1_10472_ebo_28_1_261219.ScanId;v=1;d1=31279.31279.4	controllerType=0 controllerNumber=1 scan=31279	62.3806
42629:4	1	S.MPLPPHPGHPGYINFS[+79.966]YEVLTPLK.W		S[+80]	696.851	4	2784.38	2784.36	0	6.8	17	NRagged	311.58	311.58	128.39	7.15	1278	>sp|P02817|AMELX_BOVIN Amelogenin, X isoform OS=Bos taurus OX=9913 GN=AMELX PE=1 SV=2	1	hf1_10472_ebo_28_1_261219.ScanId;v=1;d1=30683.30683.4	controllerType=0 controllerNumber=1 scan=30683	61.3153
40216:4	1	S.MPLPPHPGHPGYINFS[+79.966]YEVLTPLK.W		S[+80]	696.85	4	2784.38	2784.36	0	5.7	17	NRagged	326.81	326.81	142.33	6.45	1278	>sp|P02817|AMELX_BOVIN Amelogenin, X isoform OS=Bos taurus OX=9913 GN=AMELX PE=1 SV=2	1	hf1_10472_ebo_28_1_261219.ScanId;v=1;d1=29094.29094.4	controllerType=0 controllerNumber=1 scan=29094	58.4924
42940:4	1	S.MPLPPHPGHPGYINFS[+79.966]YEVLTPLK.W		S[+80]	696.851	4	2784.38	2784.36	0	7.1	17	NRagged	328.8	328.8	144.52	7.38	1278	>sp|P02817|AMELX_BOVIN Amelogenin, X isoform OS=Bos taurus OX=9913 GN=AMELX PE=1 SV=2	1	hf1_10472_ebo_28_1_261219.ScanId;v=1;d1=30884.30884.4	controllerType=0 controllerNumber=1 scan=30884	61.6764
38975:4	1	S.MPLPPHPGHPGYINFS[+79.966]YEVLTPLK.W		S[+80]	696.849	4	2784.37	2784.36	0	4.3	17	NRagged	329.32	329.32	115.05	6.02	1278	>sp|P02817|AMELX_BOVIN Amelogenin, X isoform OS=Bos taurus OX=9913 GN=AMELX PE=1 SV=2	1	hf1_10472_ebo_28_1_261219.ScanId;v=1;d1=28281.28281.5	controllerType=0 controllerNumber=1 scan=28281	57.048
41737:4	1	S.MPLPPHPGHPGYINFS[+79.966]YEVLTPLK.W		S[+80]	696.85	4	2784.38	2784.36	0	6.3	17	NRagged	329.98	329.98	78.51	6.45	1278	>sp|P02817|AMELX_BOVIN Amelogenin, X isoform OS=Bos taurus OX=9913 GN=AMELX PE=1 SV=2	1	hf1_10472_ebo_28_1_261219.ScanId;v=1;d1=30091.30091.4	controllerType=0 controllerNumber=1 scan=30091	60.2634
41422:4	1	S.MPLPPHPGHPGYINFS[+79.966]YEVLTPLK.W		S[+80]	696.851	4	2784.38	2784.36	0	6.6	17	NRagged	331.25	331.25	126.32	6.76	1278	>sp|P02817|AMELX_BOVIN Amelogenin, X isoform OS=Bos taurus OX=9913 GN=AMELX PE=1 SV=2	1	hf1_10472_ebo_28_1_261219.ScanId;v=1;d1=29889.29889.4	controllerType=0 controllerNumber=1 scan=29889	59.9057
40813:4	1	S.MPLPPHPGHPGYINFS[+79.966]YEVLTPLK.W		S[+80]	696.85	4	2784.38	2784.36	0	6.1	17	NRagged	333.47	333.47	102.4	6.5	1278	>sp|P02817|AMELX_BOVIN Amelogenin, X isoform OS=Bos taurus OX=9913 GN=AMELX PE=1 SV=2	1	hf1_10472_ebo_28_1_261219.ScanId;v=1;d1=29492.29492.4	controllerType=0 controllerNumber=1 scan=29492	59.2009
45822:4	1	S.MPLPPHPGHPGYINFS[+79.966]YEVLTPLK.W		S[+80]	696.85	4	2784.38	2784.36	0	5.5	17	NRagged	338.15	338.15	122.04	7.13	1278	>sp|P02817|AMELX_BOVIN Amelogenin, X isoform OS=Bos taurus OX=9913 GN=AMELX PE=1 SV=2	1	hf1_10472_ebo_28_1_261219.ScanId;v=1;d1=32823.32823.4	controllerType=0 controllerNumber=1 scan=32823	65.1721
43849:4	1	S.MPLPPHPGHPGYINFS[+79.966]YEVLTPLK.W		S[+80]	696.85	4	2784.38	2784.36	0	5.8	17	NRagged	342.76	342.76	113.09	6.5	1278	>sp|P02817|AMELX_BOVIN Amelogenin, X isoform OS=Bos taurus OX=9913 GN=AMELX PE=1 SV=2	1	hf1_10472_ebo_28_1_261219.ScanId;v=1;d1=31471.31471.4	controllerType=0 controllerNumber=1 scan=31471	62.7238
45604:4	1	S.MPLPPHPGHPGYINFS[+79.966]YEVLTPLK.W		S[+80]	696.851	4	2784.38	2784.36	0	6.7	17	NRagged	345.99	345.99	112.14	7.38	1278	>sp|P02817|AMELX_BOVIN Amelogenin, X isoform OS=Bos taurus OX=9913 GN=AMELX PE=1 SV=2	1	hf1_10472_ebo_28_1_261219.ScanId;v=1;d1=32646.32646.4	controllerType=0 controllerNumber=1 scan=32646	64.8242
39905:4	1	S.MPLPPHPGHPGYINFS[+79.966]YEVLTPLK.W		S[+80]	696.85	4	2784.38	2784.36	0	6.2	17	NRagged	347.19	347.19	167.79	7.13	1278	>sp|P02817|AMELX_BOVIN Amelogenin, X isoform OS=Bos taurus OX=9913 GN=AMELX PE=1 SV=2	1	hf1_10472_ebo_28_1_261219.ScanId;v=1;d1=28888.28888.4	controllerType=0 controllerNumber=1 scan=28888	58.1262
49224:4	1	S.MPLPPHPGHPGYINFS[+79.966]YEVLTPLK.W		S[+80]	696.852	4	2784.39	2784.36	0	8.5	17	NRagged	351.11	351.11	143.2	6.68	1278	>sp|P02817|AMELX_BOVIN Amelogenin, X isoform OS=Bos taurus OX=9913 GN=AMELX PE=1 SV=2	1	hf1_10472_ebo_28_1_261219.ScanId;v=1;d1=35974.35974.4	controllerType=0 controllerNumber=1 scan=35974	73.83
42032:4	1	S.MPLPPHPGHPGYINFS[+79.966]YEVLTPLK.W		S[+80]	696.85	4	2784.38	2784.36	0	6	17	NRagged	354.64	354.64	149.6	6.5	1278	>sp|P02817|AMELX_BOVIN Amelogenin, X isoform OS=Bos taurus OX=9913 GN=AMELX PE=1 SV=2	1	hf1_10472_ebo_28_1_261219.ScanId;v=1;d1=30287.30287.4	controllerType=0 controllerNumber=1 scan=30287	60.612
30663:5	1	S.MPLPPHPGHPGYINFS[+79.966]YEVLTPLK.W		S[+80]	557.68	5	2784.37	2784.36	0	3.9	17	NRagged	354.65	354.65	81.79	5.29	1278	>sp|P02817|AMELX_BOVIN Amelogenin, X isoform OS=Bos taurus OX=9913 GN=AMELX PE=1 SV=2	1	hf1_10472_ebo_28_1_261219.ScanId;v=1;d1=22659.22659.5	controllerType=0 controllerNumber=1 scan=22659	47.1537
42327:4	1	S.MPLPPHPGHPGYINFS[+79.966]YEVLTPLK.W		S[+80]	696.849	4	2784.38	2784.36	0	5	17	NRagged	368.33	368.33	146.32	7.44	1278	>sp|P02817|AMELX_BOVIN Amelogenin, X isoform OS=Bos taurus OX=9913 GN=AMELX PE=1 SV=2	1	hf1_10472_ebo_28_1_261219.ScanId;v=1;d1=30485.30485.4	controllerType=0 controllerNumber=1 scan=30485	60.9635
27704:3	1	S.M[+15.995]PLPPHPGHPGYINFSYEVLTPLK.W		M[+16]	907.474	3	2720.41	2720.39	0	6.2	17	NRagged	372.6	372.6	23.52	7.4	1278	>sp|P02817|AMELX_BOVIN Amelogenin, X isoform OS=Bos taurus OX=9913 GN=AMELX PE=1 SV=2	1	hf1_10472_ebo_28_1_261219.ScanId;v=1;d1=20649.20649.4	controllerType=0 controllerNumber=1 scan=20649	43.6713
27504:4	1	S.MP[+15.995]LPPHPGHPGYINFSYEVLTPLK.W		P[+16]	680.857	4	2720.41	2720.39	0	5.5	17	NRagged	374.48	374.48	5.8	7.44	1278	>sp|P02817|AMELX_BOVIN Amelogenin, X isoform OS=Bos taurus OX=9913 GN=AMELX PE=1 SV=2	1	hf1_10472_ebo_28_1_261219.ScanId;v=1;d1=20519.20519.4	controllerType=0 controllerNumber=1 scan=20519	43.4453
43254:4	1	S.MPLPPHPGHPGYINFS[+79.966]YEVLTPLK.W		S[+80]	696.851	4	2784.38	2784.36	0	6.9	17	NRagged	385.73	385.73	157.84	7.7	1278	>sp|P02817|AMELX_BOVIN Amelogenin, X isoform OS=Bos taurus OX=9913 GN=AMELX PE=1 SV=2	1	hf1_10472_ebo_28_1_261219.ScanId;v=1;d1=31084.31084.4	controllerType=0 controllerNumber=1 scan=31084	62.0326
31239:5	1	S.MPLPPHPGHPGYINFS[+79.966]YEVLTPLK.W		S[+80]	557.682	5	2784.38	2784.36	0	6.8	17	NRagged	388.74	388.74	115.2	6.79	1278	>sp|P02817|AMELX_BOVIN Amelogenin, X isoform OS=Bos taurus OX=9913 GN=AMELX PE=1 SV=2	1	hf1_10472_ebo_28_1_261219.ScanId;v=1;d1=23053.23053.5	controllerType=0 controllerNumber=1 scan=23053	47.8402
49254:3	1	S.MPLPPHPGHPGYINFS[+79.966]YEVLTPLK.W		S[+80]	928.8	3	2784.38	2784.36	0	8.1	17	NRagged	392.72	392.72	127.07	8.28	1278	>sp|P02817|AMELX_BOVIN Amelogenin, X isoform OS=Bos taurus OX=9913 GN=AMELX PE=1 SV=2	1	hf1_10472_ebo_28_1_261219.ScanId;v=1;d1=35994.35994.3	controllerType=0 controllerNumber=1 scan=35994	73.8831
35646:4	1	S.MPLPPHPGHPGYINFS[+79.966]YEVLTPLK.W		S[+80]	696.85	4	2784.38	2784.36	0	5.2	17	NRagged	402.22	402.22	177.9	7.48	1278	>sp|P02817|AMELX_BOVIN Amelogenin, X isoform OS=Bos taurus OX=9913 GN=AMELX PE=1 SV=2	1	hf1_10472_ebo_28_1_261219.ScanId;v=1;d1=26053.26053.4	controllerType=0 controllerNumber=1 scan=26053	53.0878
35111:4	1	S.MPLPPHPGHPGYINFS[+79.966]YEVLTPLK.W		S[+80]	696.85	4	2784.38	2784.36	0	5.2	17	NRagged	402.47	402.47	157.6	7.42	1278	>sp|P02817|AMELX_BOVIN Amelogenin, X isoform OS=Bos taurus OX=9913 GN=AMELX PE=1 SV=2	1	hf1_10472_ebo_28_1_261219.ScanId;v=1;d1=25690.25690.4	controllerType=0 controllerNumber=1 scan=25690	52.4485
37958:3	1	S.MPLPPHPGHPGYINFS[+79.966]YEVLTPLK.W		S[+80]	928.798	3	2784.38	2784.36	0	6.2	17	NRagged	404.01	404.01	107.35	7.38	1278	>sp|P02817|AMELX_BOVIN Amelogenin, X isoform OS=Bos taurus OX=9913 GN=AMELX PE=1 SV=2	1	hf1_10472_ebo_28_1_261219.ScanId;v=1;d1=27611.27611.3	controllerType=0 controllerNumber=1 scan=27611	55.8566
46333:3	1	S.MPLPPHPGHPGYINFS[+79.966]YEVLTPLK.W		S[+80]	928.795	3	2784.37	2784.36	0	2.9	17	NRagged	408.18	408.18	154.04	7.8	1278	>sp|P02817|AMELX_BOVIN Amelogenin, X isoform OS=Bos taurus OX=9913 GN=AMELX PE=1 SV=2	1	hf1_10472_ebo_28_1_261219.ScanId;v=1;d1=33273.33273.3	controllerType=0 controllerNumber=1 scan=33273	66.1382
36694:4	1	S.MPLPPHPGHPGYINFS[+79.966]YEVLTPLK.W		S[+80]	696.852	4	2784.39	2784.36	0	8.5	17	NRagged	413.68	413.68	202.47	7.03	1278	>sp|P02817|AMELX_BOVIN Amelogenin, X isoform OS=Bos taurus OX=9913 GN=AMELX PE=1 SV=2	1	hf1_10472_ebo_28_1_261219.ScanId;v=1;d1=26775.26775.4	controllerType=0 controllerNumber=1 scan=26775	54.381
30414:4	1	S.MPLPPHPGHPGYINFS[+79.966]YEVLTPLK.W		S[+80]	696.849	4	2784.37	2784.36	0	4.3	17	NRagged	415.66	415.66	54.76	7.17	1278	>sp|P02817|AMELX_BOVIN Amelogenin, X isoform OS=Bos taurus OX=9913 GN=AMELX PE=1 SV=2	1	hf1_10472_ebo_28_1_261219.ScanId;v=1;d1=22489.22489.4	controllerType=0 controllerNumber=1 scan=22489	46.8567
33888:4	1	S.MPLPPHPGHPGYINFS[+79.966]YEVLTPLK.W		S[+80]	696.85	4	2784.38	2784.36	0	5.2	17	NRagged	416.51	416.51	145.77	7.48	1278	>sp|P02817|AMELX_BOVIN Amelogenin, X isoform OS=Bos taurus OX=9913 GN=AMELX PE=1 SV=2	1	hf1_10472_ebo_28_1_261219.ScanId;v=1;d1=24861.24861.4	controllerType=0 controllerNumber=1 scan=24861	50.9963
30946:5	1	S.MPLPPHPGHPGYINFS[+79.966]YEVLTPLK.W		S[+80]	557.682	5	2784.38	2784.36	0	6	17	NRagged	417.04	417.04	152.4	6.57	1278	>sp|P02817|AMELX_BOVIN Amelogenin, X isoform OS=Bos taurus OX=9913 GN=AMELX PE=1 SV=2	1	hf1_10472_ebo_28_1_261219.ScanId;v=1;d1=22857.22857.5	controllerType=0 controllerNumber=1 scan=22857	47.4974
45050:4	1	S.MPLPPHPGHPGYINFS[+79.966]YEVLTPLK.W		S[+80]	696.85	4	2784.38	2784.36	0	5.7	17	NRagged	419.66	419.66	188.72	8.1	1278	>sp|P02817|AMELX_BOVIN Amelogenin, X isoform OS=Bos taurus OX=9913 GN=AMELX PE=1 SV=2	1	hf1_10472_ebo_28_1_261219.ScanId;v=1;d1=32258.32258.4	controllerType=0 controllerNumber=1 scan=32258	64.1272
34200:4	1	S.MPLPPHPGHPGYINFS[+79.966]YEVLTPLK.W		S[+80]	696.85	4	2784.38	2784.36	0	6	17	NRagged	424.1	424.1	161.77	7.42	1278	>sp|P02817|AMELX_BOVIN Amelogenin, X isoform OS=Bos taurus OX=9913 GN=AMELX PE=1 SV=2	1	hf1_10472_ebo_28_1_261219.ScanId;v=1;d1=25064.25064.4	controllerType=0 controllerNumber=1 scan=25064	51.3511
29808:4	1	S.MP[+15.995]LPPHPGHPGYINFSYEVLTPLK.W		P[+16]	680.858	4	2720.41	2720.39	0	6.6	17	NRagged	429.77	429.77	5.8	7.73	1278	>sp|P02817|AMELX_BOVIN Amelogenin, X isoform OS=Bos taurus OX=9913 GN=AMELX PE=1 SV=2	1	hf1_10472_ebo_28_1_261219.ScanId;v=1;d1=22073.22073.4	controllerType=0 controllerNumber=1 scan=22073	46.1355
36357:4	1	S.MPLPPHPGHPGYINFS[+79.966]YEVLTPLK.W		S[+80]	696.85	4	2784.38	2784.36	0	6.4	17	NRagged	430.7	430.7	191.45	8.36	1278	>sp|P02817|AMELX_BOVIN Amelogenin, X isoform OS=Bos taurus OX=9913 GN=AMELX PE=1 SV=2	1	hf1_10472_ebo_28_1_261219.ScanId;v=1;d1=26549.26549.4	controllerType=0 controllerNumber=1 scan=26549	53.9811
36996:4	1	S.MPLPPHPGHPGYINFS[+79.966]YEVLTPLK.W		S[+80]	696.851	4	2784.38	2784.36	0	7.5	17	NRagged	433.04	433.04	221.02	7.73	1278	>sp|P02817|AMELX_BOVIN Amelogenin, X isoform OS=Bos taurus OX=9913 GN=AMELX PE=1 SV=2	1	hf1_10472_ebo_28_1_261219.ScanId;v=1;d1=26973.26973.4	controllerType=0 controllerNumber=1 scan=26973	54.7294
41826:3	1	S.MPLPPHPGHPGYINFS[+79.966]YEVLTPLK.W		S[+80]	928.798	3	2784.38	2784.36	0	6.2	17	NRagged	443.96	443.96	113.65	7.41	1278	>sp|P02817|AMELX_BOVIN Amelogenin, X isoform OS=Bos taurus OX=9913 GN=AMELX PE=1 SV=2	1	hf1_10472_ebo_28_1_261219.ScanId;v=1;d1=30149.30149.3	controllerType=0 controllerNumber=1 scan=30149	60.3655
42108:3	1	S.MPLPPHPGHPGYINFS[+79.966]YEVLTPLK.W		S[+80]	928.797	3	2784.38	2784.36	0	5	17	NRagged	446.06	446.06	154.07	8.03	1278	>sp|P02817|AMELX_BOVIN Amelogenin, X isoform OS=Bos taurus OX=9913 GN=AMELX PE=1 SV=2	1	hf1_10472_ebo_28_1_261219.ScanId;v=1;d1=30339.30339.3	controllerType=0 controllerNumber=1 scan=30339	60.7052
34489:4	1	S.MPLPPHPGHPGYINFS[+79.966]YEVLTPLK.W		S[+80]	696.85	4	2784.38	2784.36	0	5.8	17	NRagged	454.99	454.99	222.93	7.46	1278	>sp|P02817|AMELX_BOVIN Amelogenin, X isoform OS=Bos taurus OX=9913 GN=AMELX PE=1 SV=2	1	hf1_10472_ebo_28_1_261219.ScanId;v=1;d1=25262.25262.4	controllerType=0 controllerNumber=1 scan=25262	51.6977
42049:3	1	S.MPLPPHPGHPGYINFS[+79.966]YEVLTPLK.W		S[+80]	928.798	3	2784.38	2784.36	0	6.4	17	NRagged	458.28	458.28	129.68	7.66	1278	>sp|P02817|AMELX_BOVIN Amelogenin, X isoform OS=Bos taurus OX=9913 GN=AMELX PE=1 SV=2	1	hf1_10472_ebo_28_1_261219.ScanId;v=1;d1=30299.30299.3	controllerType=0 controllerNumber=1 scan=30299	60.6331
45342:4	1	S.MPLPPHPGHPGYINFS[+79.966]YEVLTPLK.W		S[+80]	696.851	4	2784.38	2784.36	0	7	17	NRagged	480.97	480.97	230.67	8.42	1278	>sp|P02817|AMELX_BOVIN Amelogenin, X isoform OS=Bos taurus OX=9913 GN=AMELX PE=1 SV=2	1	hf1_10472_ebo_28_1_261219.ScanId;v=1;d1=32455.32455.4	controllerType=0 controllerNumber=1 scan=32455	64.4768
44139:4	1	S.MPLPPHPGHPGYINFS[+79.966]YEVLTPLK.W		S[+80]	696.85	4	2784.38	2784.36	0	5.4	17	NRagged	485.75	485.75	224.52	8.16	1278	>sp|P02817|AMELX_BOVIN Amelogenin, X isoform OS=Bos taurus OX=9913 GN=AMELX PE=1 SV=2	1	hf1_10472_ebo_28_1_261219.ScanId;v=1;d1=31664.31664.4	controllerType=0 controllerNumber=1 scan=31664	63.0707
28862:4	1	S.MPLPPHPGHPGYINFS[+79.966]YEVLTPLK.W		S[+80]	696.852	4	2784.39	2784.36	0	8.8	17	NRagged	485.81	485.81	197.09	7.09	1278	>sp|P02817|AMELX_BOVIN Amelogenin, X isoform OS=Bos taurus OX=9913 GN=AMELX PE=1 SV=2	1	hf1_10472_ebo_28_1_261219.ScanId;v=1;d1=21435.21435.4	controllerType=0 controllerNumber=1 scan=21435	45.0248
33022:4	1	S.MPLPPHPGHPGYINFS[+79.966]YEVLTPLK.W		S[+80]	696.85	4	2784.38	2784.36	0	5.2	17	NRagged	487.1	487.1	257.06	8.16	1278	>sp|P02817|AMELX_BOVIN Amelogenin, X isoform OS=Bos taurus OX=9913 GN=AMELX PE=1 SV=2	1	hf1_10472_ebo_28_1_261219.ScanId;v=1;d1=24272.24272.4	controllerType=0 controllerNumber=1 scan=24272	49.9676
36550:3	1	S.MPLPPHPGHPGYINFS[+79.966]YEVLTPLK.W		S[+80]	928.799	3	2784.38	2784.36	0	7.5	17	NRagged	501.77	501.77	136.13	7.74	1278	>sp|P02817|AMELX_BOVIN Amelogenin, X isoform OS=Bos taurus OX=9913 GN=AMELX PE=1 SV=2	1	hf1_10472_ebo_28_1_261219.ScanId;v=1;d1=26678.26678.3	controllerType=0 controllerNumber=1 scan=26678	54.2096
28403:4	1	S.M[+15.995]PLPPHPGHPGYINFSYEVLTPLK.W		M[+16]	680.858	4	2720.41	2720.39	0	6.9	17	NRagged	504.63	504.63	0.5	8.42	1278	>sp|P02817|AMELX_BOVIN Amelogenin, X isoform OS=Bos taurus OX=9913 GN=AMELX PE=1 SV=2	1	hf1_10472_ebo_28_1_261219.ScanId;v=1;d1=21124.21124.4	controllerType=0 controllerNumber=1 scan=21124	44.4923
44753:4	1	S.MPLPPHPGHPGYINFS[+79.966]YEVLTPLK.W		S[+80]	696.851	4	2784.38	2784.36	0	7.5	17	NRagged	507.46	507.46	223.81	8.42	1278	>sp|P02817|AMELX_BOVIN Amelogenin, X isoform OS=Bos taurus OX=9913 GN=AMELX PE=1 SV=2	1	hf1_10472_ebo_28_1_261219.ScanId;v=1;d1=32060.32060.4	controllerType=0 controllerNumber=1 scan=32060	63.7758
46161:3	1	S.MPLPPHPGHPGYINFS[+79.966]YEVLTPLK.W		S[+80]	928.798	3	2784.38	2784.36	0	6.6	17	NRagged	512.41	512.41	193.92	8.37	1278	>sp|P02817|AMELX_BOVIN Amelogenin, X isoform OS=Bos taurus OX=9913 GN=AMELX PE=1 SV=2	1	hf1_10472_ebo_28_1_261219.ScanId;v=1;d1=33114.33114.3	controllerType=0 controllerNumber=1 scan=33114	65.7951
29961:4	1	S.MPLPPHPGHPGYINFS[+79.966]YEVLTPLK.W		S[+80]	696.85	4	2784.38	2784.36	0	6.4	17	NRagged	518.43	518.43	206.92	7.79	1278	>sp|P02817|AMELX_BOVIN Amelogenin, X isoform OS=Bos taurus OX=9913 GN=AMELX PE=1 SV=2	1	hf1_10472_ebo_28_1_261219.ScanId;v=1;d1=22176.22176.4	controllerType=0 controllerNumber=1 scan=22176	46.3167
44441:4	1	S.MPLPPHPGHPGYINFS[+79.966]YEVLTPLK.W		S[+80]	696.85	4	2784.38	2784.36	0	6.2	17	NRagged	520.31	520.31	245.51	8.27	1278	>sp|P02817|AMELX_BOVIN Amelogenin, X isoform OS=Bos taurus OX=9913 GN=AMELX PE=1 SV=2	1	hf1_10472_ebo_28_1_261219.ScanId;v=1;d1=31861.31861.4	controllerType=0 controllerNumber=1 scan=31861	63.4214
33854:4	1	S.MPLPPHPGHPGYINFS[+79.966]YEVLTPLK.W		S[+80]	696.85	4	2784.38	2784.36	0	5.6	17	NRagged	527.45	527.45	209.18	7.64	1278	>sp|P02817|AMELX_BOVIN Amelogenin, X isoform OS=Bos taurus OX=9913 GN=AMELX PE=1 SV=2	1	hf1_10472_ebo_28_1_261219.ScanId;v=1;d1=24839.24839.6	controllerType=0 controllerNumber=1 scan=24839	50.9575
33319:4	1	S.MPLPPHPGHPGYINFS[+79.966]YEVLTPLK.W		S[+80]	696.849	4	2784.37	2784.36	0	3.8	17	NRagged	534.03	534.03	240.48	7.39	1278	>sp|P02817|AMELX_BOVIN Amelogenin, X isoform OS=Bos taurus OX=9913 GN=AMELX PE=1 SV=2	1	hf1_10472_ebo_28_1_261219.ScanId;v=1;d1=24480.24480.4	controllerType=0 controllerNumber=1 scan=24480	50.3329
26884:4	1	S.MP[+15.995]LPPHPGHPGYINFSYEVLTPLK.W		P[+16]	680.858	4	2720.41	2720.39	0	6.6	17	NRagged	537.02	537.02	5.8	8.52	1278	>sp|P02817|AMELX_BOVIN Amelogenin, X isoform OS=Bos taurus OX=9913 GN=AMELX PE=1 SV=2	1	hf1_10472_ebo_28_1_261219.ScanId;v=1;d1=20101.20101.4	controllerType=0 controllerNumber=1 scan=20101	42.7249
39073:3	1	S.MPLPPHPGHPGYINFS[+79.966]YEVLTPLK.W		S[+80]	928.795	3	2784.37	2784.36	0	2.8	17	NRagged	552.41	552.41	179.93	7.97	1278	>sp|P02817|AMELX_BOVIN Amelogenin, X isoform OS=Bos taurus OX=9913 GN=AMELX PE=1 SV=2	1	hf1_10472_ebo_28_1_261219.ScanId;v=1;d1=28344.28344.3	controllerType=0 controllerNumber=1 scan=28344	57.1604
45020:3	1	S.MPLPPHPGHPGYINFS[+79.966]YEVLTPLK.W		S[+80]	928.797	3	2784.38	2784.36	0	5	17	NRagged	555.2	555.2	229.45	8.22	1278	>sp|P02817|AMELX_BOVIN Amelogenin, X isoform OS=Bos taurus OX=9913 GN=AMELX PE=1 SV=2	1	hf1_10472_ebo_28_1_261219.ScanId;v=1;d1=32239.32239.3	controllerType=0 controllerNumber=1 scan=32239	64.0927
40867:3	1	S.MPLPPHPGHPGYINFS[+79.966]YEVLTPLK.W		S[+80]	928.799	3	2784.38	2784.36	0	7.6	17	NRagged	569.33	569.33	148.49	9.27	1278	>sp|P02817|AMELX_BOVIN Amelogenin, X isoform OS=Bos taurus OX=9913 GN=AMELX PE=1 SV=2	1	hf1_10472_ebo_28_1_261219.ScanId;v=1;d1=29530.29530.3	controllerType=0 controllerNumber=1 scan=29530	59.2672
38466:3	1	S.MPLPPHPGHPGYINFS[+79.966]YEVLTPLK.W		S[+80]	928.798	3	2784.38	2784.36	0	6.8	17	NRagged	575.52	575.52	211.69	8.64	1278	>sp|P02817|AMELX_BOVIN Amelogenin, X isoform OS=Bos taurus OX=9913 GN=AMELX PE=1 SV=2	1	hf1_10472_ebo_28_1_261219.ScanId;v=1;d1=27943.27943.3	controllerType=0 controllerNumber=1 scan=27943	56.451
38181:3	1	S.MPLPPHPGHPGYINFS[+79.966]YEVLTPLK.W		S[+80]	928.797	3	2784.38	2784.36	0	5.4	17	NRagged	579.84	579.84	217.82	9.01	1278	>sp|P02817|AMELX_BOVIN Amelogenin, X isoform OS=Bos taurus OX=9913 GN=AMELX PE=1 SV=2	1	hf1_10472_ebo_28_1_261219.ScanId;v=1;d1=27753.27753.3	controllerType=0 controllerNumber=1 scan=27753	56.1086
28883:3	1	S.MPLPPHPGHPGYINFS[+79.966]YEVLTPLK.W		S[+80]	928.793	3	2784.36	2784.36	0	1	17	NRagged	599.15	599.15	286.41	8.13	1278	>sp|P02817|AMELX_BOVIN Amelogenin, X isoform OS=Bos taurus OX=9913 GN=AMELX PE=1 SV=2	1	hf1_10472_ebo_28_1_261219.ScanId;v=1;d1=21447.21447.3	controllerType=0 controllerNumber=1 scan=21447	45.0455
40113:3	1	S.MPLPPHPGHPGYINFS[+79.966]YEVLTPLK.W		S[+80]	928.797	3	2784.38	2784.36	0	5	17	NRagged	599.7	599.7	189.59	9.01	1278	>sp|P02817|AMELX_BOVIN Amelogenin, X isoform OS=Bos taurus OX=9913 GN=AMELX PE=1 SV=2	1	hf1_10472_ebo_28_1_261219.ScanId;v=1;d1=29024.29024.3	controllerType=0 controllerNumber=1 scan=29024	58.3692
45574:3	1	S.MPLPPHPGHPGYINFS[+79.966]YEVLTPLK.W		S[+80]	928.798	3	2784.38	2784.36	0	6.7	17	NRagged	603.15	603.15	318.46	10.27	1278	>sp|P02817|AMELX_BOVIN Amelogenin, X isoform OS=Bos taurus OX=9913 GN=AMELX PE=1 SV=2	1	hf1_10472_ebo_28_1_261219.ScanId;v=1;d1=32621.32621.3	controllerType=0 controllerNumber=1 scan=32621	64.778
32422:4	1	S.MPLPPHPGHPGYINFS[+79.966]YEVLTPLK.W		S[+80]	696.851	4	2784.38	2784.36	0	6.9	17	NRagged	605.62	605.62	268.76	10.31	1278	>sp|P02817|AMELX_BOVIN Amelogenin, X isoform OS=Bos taurus OX=9913 GN=AMELX PE=1 SV=2	1	hf1_10472_ebo_28_1_261219.ScanId;v=1;d1=23876.23876.4	controllerType=0 controllerNumber=1 scan=23876	49.2752
32726:4	1	S.MPLPPHPGHPGYINFS[+79.966]YEVLTPLK.W		S[+80]	696.851	4	2784.38	2784.36	0	7.1	17	NRagged	607.63	607.63	299.32	10.31	1278	>sp|P02817|AMELX_BOVIN Amelogenin, X isoform OS=Bos taurus OX=9913 GN=AMELX PE=1 SV=2	1	hf1_10472_ebo_28_1_261219.ScanId;v=1;d1=24074.24074.4	controllerType=0 controllerNumber=1 scan=24074	49.6218
41617:3	1	S.MPLPPHPGHPGYINFS[+79.966]YEVLTPLK.W		S[+80]	928.797	3	2784.38	2784.36	0	5.4	17	NRagged	618.17	618.17	200.08	10.01	1278	>sp|P02817|AMELX_BOVIN Amelogenin, X isoform OS=Bos taurus OX=9913 GN=AMELX PE=1 SV=2	1	hf1_10472_ebo_28_1_261219.ScanId;v=1;d1=30013.30013.3	controllerType=0 controllerNumber=1 scan=30013	60.1253
35073:3	1	S.MPLPPHPGHPGYINFS[+79.966]YEVLTPLK.W		S[+80]	928.797	3	2784.38	2784.36	0	5.4	17	NRagged	618.47	618.47	245.14	10.01	1278	>sp|P02817|AMELX_BOVIN Amelogenin, X isoform OS=Bos taurus OX=9913 GN=AMELX PE=1 SV=2	1	hf1_10472_ebo_28_1_261219.ScanId;v=1;d1=25664.25664.3	controllerType=0 controllerNumber=1 scan=25664	52.4008
37759:3	1	S.MPLPPHPGHPGYINFS[+79.966]YEVLTPLK.W		S[+80]	928.797	3	2784.38	2784.36	0	4.7	17	NRagged	630.58	630.58	209.25	10.01	1278	>sp|P02817|AMELX_BOVIN Amelogenin, X isoform OS=Bos taurus OX=9913 GN=AMELX PE=1 SV=2	1	hf1_10472_ebo_28_1_261219.ScanId;v=1;d1=27480.27480.3	controllerType=0 controllerNumber=1 scan=27480	55.6255
28103:4	1	S.MP[+15.995]LPPHPGHPGYINFSYEVLTPLK.W		P[+16]	680.857	4	2720.41	2720.39	0	5.6	17	NRagged	633.41	633.41	5.8	10.06	1278	>sp|P02817|AMELX_BOVIN Amelogenin, X isoform OS=Bos taurus OX=9913 GN=AMELX PE=1 SV=2	1	hf1_10472_ebo_28_1_261219.ScanId;v=1;d1=20923.20923.4	controllerType=0 controllerNumber=1 scan=20923	44.1463
45311:3	1	S.MPLPPHPGHPGYINFS[+79.966]YEVLTPLK.W		S[+80]	928.798	3	2784.38	2784.36	0	6.7	17	NRagged	635.95	635.95	323.21	10.27	1278	>sp|P02817|AMELX_BOVIN Amelogenin, X isoform OS=Bos taurus OX=9913 GN=AMELX PE=1 SV=2	1	hf1_10472_ebo_28_1_261219.ScanId;v=1;d1=32433.32433.3	controllerType=0 controllerNumber=1 scan=32433	64.4378
37468:3	1	S.MPLPPHPGHPGYINFS[+79.966]YEVLTPLK.W		S[+80]	928.797	3	2784.38	2784.36	0	5	17	NRagged	644.82	644.82	229.84	10.01	1278	>sp|P02817|AMELX_BOVIN Amelogenin, X isoform OS=Bos taurus OX=9913 GN=AMELX PE=1 SV=2	1	hf1_10472_ebo_28_1_261219.ScanId;v=1;d1=27285.27285.3	controllerType=0 controllerNumber=1 scan=27285	55.2811
30109:3	1	S.MPLPPHPGHPGYINFS[+79.966]YEVLTPLK.W		S[+80]	928.799	3	2784.38	2784.36	0	7.2	17	NRagged	654.47	654.47	301.75	11.27	1278	>sp|P02817|AMELX_BOVIN Amelogenin, X isoform OS=Bos taurus OX=9913 GN=AMELX PE=1 SV=2	1	hf1_10472_ebo_28_1_261219.ScanId;v=1;d1=22276.22276.3	controllerType=0 controllerNumber=1 scan=22276	46.4893
42821:3	1	S.MPLPPHPGHPGYINFS[+79.966]YEVLTPLK.W		S[+80]	928.799	3	2784.38	2784.36	0	7.7	17	NRagged	655.28	655.28	226.64	11.27	1278	>sp|P02817|AMELX_BOVIN Amelogenin, X isoform OS=Bos taurus OX=9913 GN=AMELX PE=1 SV=2	1	hf1_10472_ebo_28_1_261219.ScanId;v=1;d1=30802.30802.3	controllerType=0 controllerNumber=1 scan=30802	61.5278
35779:3	1	S.MPLPPHPGHPGYINFS[+79.966]YEVLTPLK.W		S[+80]	928.799	3	2784.38	2784.36	0	7	17	NRagged	656.63	656.63	233.95	11.27	1278	>sp|P02817|AMELX_BOVIN Amelogenin, X isoform OS=Bos taurus OX=9913 GN=AMELX PE=1 SV=2	1	hf1_10472_ebo_28_1_261219.ScanId;v=1;d1=26148.26148.3	controllerType=0 controllerNumber=1 scan=26148	53.2604
43149:3	1	S.MPLPPHPGHPGYINFS[+79.966]YEVLTPLK.W		S[+80]	928.799	3	2784.38	2784.36	0	7.2	17	NRagged	664.04	664.04	261.38	11.27	1278	>sp|P02817|AMELX_BOVIN Amelogenin, X isoform OS=Bos taurus OX=9913 GN=AMELX PE=1 SV=2	1	hf1_10472_ebo_28_1_261219.ScanId;v=1;d1=31018.31018.3	controllerType=0 controllerNumber=1 scan=31018	61.9149
44685:3	1	S.MPLPPHPGHPGYINFS[+79.966]YEVLTPLK.W		S[+80]	928.798	3	2784.38	2784.36	0	6.4	17	NRagged	666.03	666.03	209.41	11.27	1278	>sp|P02817|AMELX_BOVIN Amelogenin, X isoform OS=Bos taurus OX=9913 GN=AMELX PE=1 SV=2	1	hf1_10472_ebo_28_1_261219.ScanId;v=1;d1=32017.32017.3	controllerType=0 controllerNumber=1 scan=32017	63.699
42517:3	1	S.MPLPPHPGHPGYINFS[+79.966]YEVLTPLK.W		S[+80]	928.797	3	2784.38	2784.36	0	5.4	17	NRagged	668.58	668.58	234.86	11.01	1278	>sp|P02817|AMELX_BOVIN Amelogenin, X isoform OS=Bos taurus OX=9913 GN=AMELX PE=1 SV=2	1	hf1_10472_ebo_28_1_261219.ScanId;v=1;d1=30611.30611.3	controllerType=0 controllerNumber=1 scan=30611	61.1859
39370:3	1	S.MPLPPHPGHPGYINFS[+79.966]YEVLTPLK.W		S[+80]	928.799	3	2784.38	2784.36	0	7.5	17	NRagged	673.38	673.38	264.24	11.27	1278	>sp|P02817|AMELX_BOVIN Amelogenin, X isoform OS=Bos taurus OX=9913 GN=AMELX PE=1 SV=2	1	hf1_10472_ebo_28_1_261219.ScanId;v=1;d1=28543.28543.3	controllerType=0 controllerNumber=1 scan=28543	57.5145
33848:3	1	S.MPLPPHPGHPGYINFS[+79.966]YEVLTPLK.W		S[+80]	928.797	3	2784.37	2784.36	0	4.7	17	NRagged	679.15	679.15	280.32	11.01	1278	>sp|P02817|AMELX_BOVIN Amelogenin, X isoform OS=Bos taurus OX=9913 GN=AMELX PE=1 SV=2	1	hf1_10472_ebo_28_1_261219.ScanId;v=1;d1=24836.24836.3	controllerType=0 controllerNumber=1 scan=24836	50.9531
43764:3	1	S.MPLPPHPGHPGYINFS[+79.966]YEVLTPLK.W		S[+80]	928.799	3	2784.38	2784.36	0	6.9	17	NRagged	681.03	681.03	273	11.27	1278	>sp|P02817|AMELX_BOVIN Amelogenin, X isoform OS=Bos taurus OX=9913 GN=AMELX PE=1 SV=2	1	hf1_10472_ebo_28_1_261219.ScanId;v=1;d1=31416.31416.3	controllerType=0 controllerNumber=1 scan=31416	62.6259
34467:3	1	S.MPLPPHPGHPGYINFS[+79.966]YEVLTPLK.W		S[+80]	928.796	3	2784.37	2784.36	0	3.7	17	NRagged	683.83	683.83	273.96	10.76	1278	>sp|P02817|AMELX_BOVIN Amelogenin, X isoform OS=Bos taurus OX=9913 GN=AMELX PE=1 SV=2	1	hf1_10472_ebo_28_1_261219.ScanId;v=1;d1=25249.25249.3	controllerType=0 controllerNumber=1 scan=25249	51.6756
27806:4	1	S.MP[+15.995]LPPHPGHPGYINFSYEVLTPLK.W		P[+16]	680.857	4	2720.41	2720.39	0	6.3	17	NRagged	692.25	692.25	4	11.06	1278	>sp|P02817|AMELX_BOVIN Amelogenin, X isoform OS=Bos taurus OX=9913 GN=AMELX PE=1 SV=2	1	hf1_10472_ebo_28_1_261219.ScanId;v=1;d1=20724.20724.4	controllerType=0 controllerNumber=1 scan=20724	43.8021
43461:3	1	S.MPLPPHPGHPGYINFS[+79.966]YEVLTPLK.W		S[+80]	928.799	3	2784.38	2784.36	0	7.7	17	NRagged	716.22	716.22	275.4	12.27	1278	>sp|P02817|AMELX_BOVIN Amelogenin, X isoform OS=Bos taurus OX=9913 GN=AMELX PE=1 SV=2	1	hf1_10472_ebo_28_1_261219.ScanId;v=1;d1=31215.31215.3	controllerType=0 controllerNumber=1 scan=31215	62.2661
31210:2	1	S.MPLPPHPGHPGYINFS[+79.966]YEVLTPLK.W		S[+80]	1392.7	2	2784.39	2784.36	0	9	17	NRagged	721.27	721.27	251.38	10.7	1278	>sp|P02817|AMELX_BOVIN Amelogenin, X isoform OS=Bos taurus OX=9913 GN=AMELX PE=1 SV=2	1	hf1_10472_ebo_28_1_261219.ScanId;v=1;d1=23033.23033.2	controllerType=0 controllerNumber=1 scan=23033	47.8045
32127:4	1	S.MPLPPHPGHPGYINFS[+79.966]YEVLTPLK.W		S[+80]	696.85	4	2784.38	2784.36	0	5.5	17	NRagged	740.46	740.46	387.93	12.06	1278	>sp|P02817|AMELX_BOVIN Amelogenin, X isoform OS=Bos taurus OX=9913 GN=AMELX PE=1 SV=2	1	hf1_10472_ebo_28_1_261219.ScanId;v=1;d1=23678.23678.4	controllerType=0 controllerNumber=1 scan=23678	48.9286
38763:3	1	S.MPLPPHPGHPGYINFS[+79.966]YEVLTPLK.W		S[+80]	928.799	3	2784.38	2784.36	0	7	17	NRagged	743.26	743.26	301.37	12.27	1278	>sp|P02817|AMELX_BOVIN Amelogenin, X isoform OS=Bos taurus OX=9913 GN=AMELX PE=1 SV=2	1	hf1_10472_ebo_28_1_261219.ScanId;v=1;d1=28145.28145.3	controllerType=0 controllerNumber=1 scan=28145	56.8084
00432:3	1	S.MPLPPHPGHPGYINFS[+79.966]YEVLTPLK.W		S[+80]	928.793	3	2784.37	2784.36	0	1.4	17	NRagged	758.08	758.08	308.99	12.13	1278	>sp|P02817|AMELX_BOVIN Amelogenin, X isoform OS=Bos taurus OX=9913 GN=AMELX PE=1 SV=2	1	hf1_10472_ebo_28_1_261219.ScanId;v=1;d1=1865.1865.3	controllerType=0 controllerNumber=1 scan=1865	10.1058
44066:3	1	S.MPLPPHPGHPGYINFS[+79.966]YEVLTPLK.W		S[+80]	928.798	3	2784.38	2784.36	0	6.6	17	NRagged	783.94	783.94	290.94	13.27	1278	>sp|P02817|AMELX_BOVIN Amelogenin, X isoform OS=Bos taurus OX=9913 GN=AMELX PE=1 SV=2	1	hf1_10472_ebo_28_1_261219.ScanId;v=1;d1=31617.31617.3	controllerType=0 controllerNumber=1 scan=31617	62.9852
30701:4	1	S.MPLPPHPGHPGYINFS[+79.966]YEVLTPLK.W		S[+80]	696.85	4	2784.38	2784.36	0	6.4	17	NRagged	787.1	787.1	409.96	13.31	1278	>sp|P02817|AMELX_BOVIN Amelogenin, X isoform OS=Bos taurus OX=9913 GN=AMELX PE=1 SV=2	1	hf1_10472_ebo_28_1_261219.ScanId;v=1;d1=22690.22690.4	controllerType=0 controllerNumber=1 scan=22690	47.2075
34175:3	1	S.MPLPPHPGHPGYINFS[+79.966]YEVLTPLK.W		S[+80]	928.798	3	2784.38	2784.36	0	5.9	17	NRagged	797.07	797.07	349.62	13.01	1278	>sp|P02817|AMELX_BOVIN Amelogenin, X isoform OS=Bos taurus OX=9913 GN=AMELX PE=1 SV=2	1	hf1_10472_ebo_28_1_261219.ScanId;v=1;d1=25047.25047.3	controllerType=0 controllerNumber=1 scan=25047	51.3197
31285:4	1	S.MPLPPHPGHPGYINFS[+79.966]YEVLTPLK.W		S[+80]	696.849	4	2784.37	2784.36	0	4.5	17	NRagged	802.36	802.36	424.66	14.06	1278	>sp|P02817|AMELX_BOVIN Amelogenin, X isoform OS=Bos taurus OX=9913 GN=AMELX PE=1 SV=2	1	hf1_10472_ebo_28_1_261219.ScanId;v=1;d1=23085.23085.4	controllerType=0 controllerNumber=1 scan=23085	47.896
30987:4	1	S.MPLPPHPGHPGYINFS[+79.966]YEVLTPLK.W		S[+80]	696.851	4	2784.38	2784.36	0	6.9	17	NRagged	809.19	809.19	460.77	14.31	1278	>sp|P02817|AMELX_BOVIN Amelogenin, X isoform OS=Bos taurus OX=9913 GN=AMELX PE=1 SV=2	1	hf1_10472_ebo_28_1_261219.ScanId;v=1;d1=22887.22887.4	controllerType=0 controllerNumber=1 scan=22887	47.5495
44372:3	1	S.MPLPPHPGHPGYINFS[+79.966]YEVLTPLK.W		S[+80]	928.798	3	2784.38	2784.36	0	6.3	17	NRagged	848.69	848.69	350.47	14.01	1278	>sp|P02817|AMELX_BOVIN Amelogenin, X isoform OS=Bos taurus OX=9913 GN=AMELX PE=1 SV=2	1	hf1_10472_ebo_28_1_261219.ScanId;v=1;d1=31818.31818.3	controllerType=0 controllerNumber=1 scan=31818	63.3444
32554:3	1	S.MPLPPHPGHPGYINFS[+79.966]YEVLTPLK.W		S[+80]	928.799	3	2784.38	2784.36	0	7.9	17	NRagged	852.93	852.93	352.8	15.27	1278	>sp|P02817|AMELX_BOVIN Amelogenin, X isoform OS=Bos taurus OX=9913 GN=AMELX PE=1 SV=2	1	hf1_10472_ebo_28_1_261219.ScanId;v=1;d1=23966.23966.3	controllerType=0 controllerNumber=1 scan=23966	49.4318
33259:3	1	S.MPLPPHPGHPGYINFS[+79.966]YEVLTPLK.W		S[+80]	928.798	3	2784.38	2784.36	0	6.1	17	NRagged	864.91	864.91	412.48	15.01	1278	>sp|P02817|AMELX_BOVIN Amelogenin, X isoform OS=Bos taurus OX=9913 GN=AMELX PE=1 SV=2	1	hf1_10472_ebo_28_1_261219.ScanId;v=1;d1=24434.24434.3	controllerType=0 controllerNumber=1 scan=24434	50.2506
30628:2	1	S.MPLPPHPGHPGYINFS[+79.966]YEVLTPLK.W		S[+80]	1392.7	2	2784.38	2784.36	0	8.3	17	NRagged	880.25	880.25	361.93	13.7	1278	>sp|P02817|AMELX_BOVIN Amelogenin, X isoform OS=Bos taurus OX=9913 GN=AMELX PE=1 SV=2	1	hf1_10472_ebo_28_1_261219.ScanId;v=1;d1=22637.22637.2	controllerType=0 controllerNumber=1 scan=22637	47.1158
30909:2	1	S.MPLPPHPGHPGYINFS[+79.966]YEVLTPLK.W		S[+80]	1392.7	2	2784.38	2784.36	0	7.9	17	NRagged	904.94	904.94	354.01	15.4	1278	>sp|P02817|AMELX_BOVIN Amelogenin, X isoform OS=Bos taurus OX=9913 GN=AMELX PE=1 SV=2	1	hf1_10472_ebo_28_1_261219.ScanId;v=1;d1=22833.22833.2	controllerType=0 controllerNumber=1 scan=22833	47.4565
32868:3	1	S.MPLPPHPGHPGYINFS[+79.966]YEVLTPLK.W		S[+80]	928.797	3	2784.38	2784.36	0	4.9	17	NRagged	938.64	938.64	402.35	16.01	1278	>sp|P02817|AMELX_BOVIN Amelogenin, X isoform OS=Bos taurus OX=9913 GN=AMELX PE=1 SV=2	1	hf1_10472_ebo_28_1_261219.ScanId;v=1;d1=24172.24172.3	controllerType=0 controllerNumber=1 scan=24172	49.7927
32111:3	1	S.MPLPPHPGHPGYINFS[+79.966]YEVLTPLK.W		S[+80]	928.796	3	2784.37	2784.36	0	4.1	17	NRagged	1092.77	1092.77	452.34	18.76	1278	>sp|P02817|AMELX_BOVIN Amelogenin, X isoform OS=Bos taurus OX=9913 GN=AMELX PE=1 SV=2	1	hf1_10472_ebo_28_1_261219.ScanId;v=1;d1=23668.23668.3	controllerType=0 controllerNumber=1 scan=23668	48.9107
30972:3	1	S.MPLPPHPGHPGYINFS[+79.966]YEVLTPLK.W		S[+80]	928.798	3	2784.38	2784.36	0	6.3	17	NRagged	1172.55	1172.55	535.12	21.01	1278	>sp|P02817|AMELX_BOVIN Amelogenin, X isoform OS=Bos taurus OX=9913 GN=AMELX PE=1 SV=2	1	hf1_10472_ebo_28_1_261219.ScanId;v=1;d1=22876.22876.3	controllerType=0 controllerNumber=1 scan=22876	47.5313
31269:3	1	S.MPLPPHPGHPGYINFS[+79.966]YEVLTPLK.W		S[+80]	928.796	3	2784.37	2784.36	0	4.4	17	NRagged	1197.39	1197.39	545.82	20.76	1278	>sp|P02817|AMELX_BOVIN Amelogenin, X isoform OS=Bos taurus OX=9913 GN=AMELX PE=1 SV=2	1	hf1_10472_ebo_28_1_261219.ScanId;v=1;d1=23074.23074.3	controllerType=0 controllerNumber=1 scan=23074	47.8766
30689:3	1	S.MPLPPHPGHPGYINFS[+79.966]YEVLTPLK.W		S[+80]	928.798	3	2784.38	2784.36	0	5.8	17	NRagged	1219.45	1219.45	567.37	22.01	1278	>sp|P02817|AMELX_BOVIN Amelogenin, X isoform OS=Bos taurus OX=9913 GN=AMELX PE=1 SV=2	1	hf1_10472_ebo_28_1_261219.ScanId;v=1;d1=22679.22679.3	controllerType=0 controllerNumber=1 scan=22679	47.1894
31029:4	1	S.MPLPPHPGHPGYINF[+31.990]SY[+31.990]EVLTPLK.W		F[+32], Y[+32]	692.843	4	2768.35	2768.38	0	-8.4	17	NRagged	3.07	3.07	3.07	0.56	1278	>sp|P02817|AMELX_BOVIN Amelogenin, X isoform OS=Bos taurus OX=9913 GN=AMELX PE=1 SV=2	1	hf1_10472_ebo_28_1_261219.ScanId;v=1;d1=22917.22917.4	controllerType=0 controllerNumber=1 scan=22917	47.5993
46543:3	1	S.MP[+15.995]LPPHPGHPGYINFS[+79.966]YEVLTPLK.W		P[+16], S[+80]	934.131	3	2800.38	2800.36	0	8	17	NRagged	3.49	3.49	3.49	3.28	1278	>sp|P02817|AMELX_BOVIN Amelogenin, X isoform OS=Bos taurus OX=9913 GN=AMELX PE=1 SV=2	1	hf1_10472_ebo_28_1_261219.ScanId;v=1;d1=33455.33455.3	controllerType=0 controllerNumber=1 scan=33455	66.5814
46695:3	1	S.MP[+15.995]LPPHPGHPGYINFS[+79.966]YEVLTPLK.W		P[+16], S[+80]	934.128	3	2800.37	2800.36	0	4.3	17	NRagged	59.67	59.67	4	2.89	1278	>sp|P02817|AMELX_BOVIN Amelogenin, X isoform OS=Bos taurus OX=9913 GN=AMELX PE=1 SV=2	1	hf1_10472_ebo_28_1_261219.ScanId;v=1;d1=33610.33610.3	controllerType=0 controllerNumber=1 scan=33610	67.0203
00730:3	1	S.MP[+15.995]LPPHPGHPGYINFS[+79.966]YEVLTPLK.W		P[+16], S[+80]	934.126	3	2800.36	2800.36	0	2.1	17	NRagged	76.74	76.74	4	2.28	1278	>sp|P02817|AMELX_BOVIN Amelogenin, X isoform OS=Bos taurus OX=9913 GN=AMELX PE=1 SV=2	1	hf1_10472_ebo_28_1_261219.ScanId;v=1;d1=2133.2133.3	controllerType=0 controllerNumber=1 scan=2133	10.8639
46659:3	1	S.MP[+15.995]LPPHPGHPGYINFS[+79.966]YEVLTPLK.W		P[+16], S[+80]	934.126	3	2800.36	2800.36	0	2.2	17	NRagged	95.02	95.02	4	2.7	1278	>sp|P02817|AMELX_BOVIN Amelogenin, X isoform OS=Bos taurus OX=9913 GN=AMELX PE=1 SV=2	1	hf1_10472_ebo_28_1_261219.ScanId;v=1;d1=33574.33574.3	controllerType=0 controllerNumber=1 scan=33574	66.9255
46063:4	1	S.MP[+15.995]LPPHPGHPGYINFS[+79.966]YEVLTPLK.W		P[+16], S[+80]	700.847	4	2800.37	2800.36	0	3.6	17	NRagged	98.81	98.81	4	3.11	1278	>sp|P02817|AMELX_BOVIN Amelogenin, X isoform OS=Bos taurus OX=9913 GN=AMELX PE=1 SV=2	1	hf1_10472_ebo_28_1_261219.ScanId;v=1;d1=33031.33031.4	controllerType=0 controllerNumber=1 scan=33031	65.6126
46546:3	1	S.MP[+15.995]LPPHPGHPGYINFS[+79.966]YEVLTPLK.W		P[+16], S[+80]	934.131	3	2800.38	2800.36	0	8	17	NRagged	100.57	100.57	4	3.76	1278	>sp|P02817|AMELX_BOVIN Amelogenin, X isoform OS=Bos taurus OX=9913 GN=AMELX PE=1 SV=2	1	hf1_10472_ebo_28_1_261219.ScanId;v=1;d1=33457.33457.3	controllerType=0 controllerNumber=1 scan=33457	66.5844
27431:4	1	S.MP[+15.995]LP[+15.995]PHPGHPGYINFSYEVLTPLK.W		P[+16]*2	684.856	4	2736.4	2736.39	0	6.4	17	NRagged	104.35	104.35	0	2.33	1278	>sp|P02817|AMELX_BOVIN Amelogenin, X isoform OS=Bos taurus OX=9913 GN=AMELX PE=1 SV=2	1	hf1_10472_ebo_28_1_261219.ScanId;v=1;d1=20467.20467.2	controllerType=0 controllerNumber=1 scan=20467	43.355
27298:4	1	S.MP[+15.995]LPPHPGHPGYINFS[+79.966]YEVLTPLK.W		P[+16], S[+80]	700.849	4	2800.38	2800.36	0	6.8	17	NRagged	113.96	113.96	5.8	2.44	1278	>sp|P02817|AMELX_BOVIN Amelogenin, X isoform OS=Bos taurus OX=9913 GN=AMELX PE=1 SV=2	1	hf1_10472_ebo_28_1_261219.ScanId;v=1;d1=20379.20379.4	controllerType=0 controllerNumber=1 scan=20379	43.2055
00945:3	1	S.MP[+15.995]LPPHPGHPGYINFS[+79.966]YEVLTPLK.W		P[+16], S[+80]	934.127	3	2800.37	2800.36	0	3.2	17	NRagged	134.48	134.48	4	4.28	1278	>sp|P02817|AMELX_BOVIN Amelogenin, X isoform OS=Bos taurus OX=9913 GN=AMELX PE=1 SV=2	1	hf1_10472_ebo_28_1_261219.ScanId;v=1;d1=2341.2341.3	controllerType=0 controllerNumber=1 scan=2341	11.5374
34650:4	1	S.MPLPPHP[+15.995]GHPGYINFS[+79.966]YEVLTPLK.W		P[+16], S[+80]	700.846	4	2800.36	2800.36	0	1.5	17	NRagged	138.81	138.81	1.83	2.21	1278	>sp|P02817|AMELX_BOVIN Amelogenin, X isoform OS=Bos taurus OX=9913 GN=AMELX PE=1 SV=2	1	hf1_10472_ebo_28_1_261219.ScanId;v=1;d1=25370.25370.2	controllerType=0 controllerNumber=1 scan=25370	51.8859
44244:4	1	S.MP[+15.995]LPPHPGHPGYINFS[+79.966]YEVLTPLK.W		P[+16], S[+80]	700.849	4	2800.38	2800.36	0	6.8	17	NRagged	149.08	149.08	4	3.4	1278	>sp|P02817|AMELX_BOVIN Amelogenin, X isoform OS=Bos taurus OX=9913 GN=AMELX PE=1 SV=2	1	hf1_10472_ebo_28_1_261219.ScanId;v=1;d1=31731.31731.4	controllerType=0 controllerNumber=1 scan=31731	63.1892
47610:3	1	S.M[+15.995]PLPPHPGHPGYINFS[+79.966]YEVLTPLK.W		M[+16], S[+80]	934.128	3	2800.37	2800.36	0	4.7	17	NRagged	152.92	152.92	18.98	3.68	1278	>sp|P02817|AMELX_BOVIN Amelogenin, X isoform OS=Bos taurus OX=9913 GN=AMELX PE=1 SV=2	1	hf1_10472_ebo_28_1_261219.ScanId;v=1;d1=34416.34416.3	controllerType=0 controllerNumber=1 scan=34416	69.2383
38625:4	1	S.MP[+15.995]LPPHPGHPGYINFS[+79.966]YEVLTPLK.W		P[+16], S[+80]	700.85	4	2800.38	2800.36	0	7.9	17	NRagged	193.18	193.18	5.8	4.07	1278	>sp|P02817|AMELX_BOVIN Amelogenin, X isoform OS=Bos taurus OX=9913 GN=AMELX PE=1 SV=2	1	hf1_10472_ebo_28_1_261219.ScanId;v=1;d1=28053.28053.4	controllerType=0 controllerNumber=1 scan=28053	56.644
39908:4	1	S.MP[+15.995]LPPHPGHPGYINFS[+79.966]YEVLTPLK.W		P[+16], S[+80]	700.85	4	2800.38	2800.36	0	6.9	17	NRagged	205.47	205.47	5.8	4.61	1278	>sp|P02817|AMELX_BOVIN Amelogenin, X isoform OS=Bos taurus OX=9913 GN=AMELX PE=1 SV=2	1	hf1_10472_ebo_28_1_261219.ScanId;v=1;d1=28890.28890.4	controllerType=0 controllerNumber=1 scan=28890	58.1292
27262:4	1	S.MP[+15.995]LPPHPGHPGYINFS[+79.966]YEVLTPLK.W		P[+16], S[+80]	700.85	4	2800.38	2800.36	0	7.5	17	NRagged	209.04	209.04	5.8	4.25	1278	>sp|P02817|AMELX_BOVIN Amelogenin, X isoform OS=Bos taurus OX=9913 GN=AMELX PE=1 SV=2	1	hf1_10472_ebo_28_1_261219.ScanId;v=1;d1=20356.20356.4	controllerType=0 controllerNumber=1 scan=20356	43.1659
00178:3	1	S.MPLPPHPGHPGYIN[+0.984]FS[+79.966]YEVLTPLK.W		N[+1], S[+80]	929.129	3	2785.37	2785.35	0	9.6	17	NRagged	209.57	209.57	78.39	4.1	1278	>sp|P02817|AMELX_BOVIN Amelogenin, X isoform OS=Bos taurus OX=9913 GN=AMELX PE=1 SV=2	1	hf1_10472_ebo_28_1_261219.ScanId;v=1;d1=639.639.3	controllerType=0 controllerNumber=1 scan=639	3.3523
38979:4	1	S.MP[+15.995]LPPHPGHPGYINFS[+79.966]YEVLTPLK.W		P[+16], S[+80]	700.85	4	2800.38	2800.36	0	6.9	17	NRagged	220.31	220.31	5.8	4.61	1278	>sp|P02817|AMELX_BOVIN Amelogenin, X isoform OS=Bos taurus OX=9913 GN=AMELX PE=1 SV=2	1	hf1_10472_ebo_28_1_261219.ScanId;v=1;d1=28283.28283.4	controllerType=0 controllerNumber=1 scan=28283	57.0511
29117:3	1	S.MP[+15.995]LPPHPGHPGYINFS[+79.966]YEVLTPLK.W		P[+16], S[+80]	934.129	3	2800.37	2800.36	0	5.2	17	NRagged	224.26	224.26	4	3.95	1278	>sp|P02817|AMELX_BOVIN Amelogenin, X isoform OS=Bos taurus OX=9913 GN=AMELX PE=1 SV=2	1	hf1_10472_ebo_28_1_261219.ScanId;v=1;d1=21605.21605.3	controllerType=0 controllerNumber=1 scan=21605	45.3238
39278:4	1	S.MP[+15.995]LPPHPGHPGYINFS[+79.966]YEVLTPLK.W		P[+16], S[+80]	700.851	4	2800.38	2800.36	0	8.6	17	NRagged	225.59	225.59	5.8	3.92	1278	>sp|P02817|AMELX_BOVIN Amelogenin, X isoform OS=Bos taurus OX=9913 GN=AMELX PE=1 SV=2	1	hf1_10472_ebo_28_1_261219.ScanId;v=1;d1=28483.28483.4	controllerType=0 controllerNumber=1 scan=28483	57.4098
00426:4	1	S.MPLPPHPGHPGYIN[+0.984]FS[+79.966]YEVLTPLK.W		N[+1], S[+80]	697.098	4	2785.37	2785.35	0	8.6	17	NRagged	227	227	78.79	3.92	1278	>sp|P02817|AMELX_BOVIN Amelogenin, X isoform OS=Bos taurus OX=9913 GN=AMELX PE=1 SV=2	1	hf1_10472_ebo_28_1_261219.ScanId;v=1;d1=1862.1862.4	controllerType=0 controllerNumber=1 scan=1862	10.1013
45673:4	1	S.MP[+15.995]LPPHPGHPGYINFS[+79.966]YEVLTPLK.W		P[+16], S[+80]	700.847	4	2800.37	2800.36	0	3.8	17	NRagged	231.08	231.08	4	4.58	1278	>sp|P02817|AMELX_BOVIN Amelogenin, X isoform OS=Bos taurus OX=9913 GN=AMELX PE=1 SV=2	1	hf1_10472_ebo_28_1_261219.ScanId;v=1;d1=32701.32701.4	controllerType=0 controllerNumber=1 scan=32701	64.9298
37622:4	1	S.MP[+15.995]LPPHPGHPGYINFS[+79.966]YEVLTPLK.W		P[+16], S[+80]	700.85	4	2800.38	2800.36	0	7.3	17	NRagged	233.38	233.38	5.8	4.61	1278	>sp|P02817|AMELX_BOVIN Amelogenin, X isoform OS=Bos taurus OX=9913 GN=AMELX PE=1 SV=2	1	hf1_10472_ebo_28_1_261219.ScanId;v=1;d1=27385.27385.4	controllerType=0 controllerNumber=1 scan=27385	55.4571
46385:3	1	S.MP[+15.995]LPPHPGHPGYINFS[+79.966]YEVLTPLK.W		P[+16], S[+80]	934.128	3	2800.37	2800.36	0	4.5	17	NRagged	236.13	236.13	2.5	5.4	1278	>sp|P02817|AMELX_BOVIN Amelogenin, X isoform OS=Bos taurus OX=9913 GN=AMELX PE=1 SV=2	1	hf1_10472_ebo_28_1_261219.ScanId;v=1;d1=33318.33318.3	controllerType=0 controllerNumber=1 scan=33318	66.2439
41110:4	1	S.MP[+15.995]LPPHPGHPGYINFS[+79.966]YEVLTPLK.W		P[+16], S[+80]	700.85	4	2800.38	2800.36	0	7.3	17	NRagged	242.6	242.6	4	6.38	1278	>sp|P02817|AMELX_BOVIN Amelogenin, X isoform OS=Bos taurus OX=9913 GN=AMELX PE=1 SV=2	1	hf1_10472_ebo_28_1_261219.ScanId;v=1;d1=29685.29685.4	controllerType=0 controllerNumber=1 scan=29685	59.542
29157:4	1	S.MPLPPHPGHPGYIN[+0.984]FS[+79.966]YEVLTPLK.W		N[+1], S[+80]	697.091	4	2785.34	2785.35	0	-1.4	17	NRagged	250.51	250.51	54.23	4.8	1278	>sp|P02817|AMELX_BOVIN Amelogenin, X isoform OS=Bos taurus OX=9913 GN=AMELX PE=1 SV=2	1	hf1_10472_ebo_28_1_261219.ScanId;v=1;d1=21634.21634.4	controllerType=0 controllerNumber=1 scan=21634	45.3751
49262:3	1	S.M[+15.995]PLPPHPGHPGYINFS[+79.966]YEVLTPLK.W		M[+16], S[+80]	934.131	3	2800.38	2800.36	0	7.7	17	NRagged	252.45	252.45	40.57	6.16	1278	>sp|P02817|AMELX_BOVIN Amelogenin, X isoform OS=Bos taurus OX=9913 GN=AMELX PE=1 SV=2	1	hf1_10472_ebo_28_1_261219.ScanId;v=1;d1=36002.36002.3	controllerType=0 controllerNumber=1 scan=36002	73.9096
28698:4	1	S.MP[+15.995]LPPHPGHPGYINFS[+79.966]YEVLTPLK.W		P[+16], S[+80]	700.849	4	2800.38	2800.36	0	6.7	17	NRagged	253.79	253.79	5.8	5.97	1278	>sp|P02817|AMELX_BOVIN Amelogenin, X isoform OS=Bos taurus OX=9913 GN=AMELX PE=1 SV=2	1	hf1_10472_ebo_28_1_261219.ScanId;v=1;d1=21324.21324.4	controllerType=0 controllerNumber=1 scan=21324	44.8347
00023:3	1	S.MP[+15.995]LPPHPGHPGYINFS[+79.966]YEVLTPLK.W		P[+16], S[+80]	934.132	3	2800.38	2800.36	0	8.5	17	NRagged	256.56	256.56	4	5.22	1278	>sp|P02817|AMELX_BOVIN Amelogenin, X isoform OS=Bos taurus OX=9913 GN=AMELX PE=1 SV=2	1	hf1_10472_ebo_28_1_261219.ScanId;v=1;d1=106.106.3	controllerType=0 controllerNumber=1 scan=106	0.5304
34252:4	1	S.MP[+15.995]LPPHPGHPGYINFS[+79.966]YEVLTPLK.W		P[+16], S[+80]	700.849	4	2800.37	2800.36	0	6.3	17	NRagged	259.58	259.58	5.8	5.71	1278	>sp|P02817|AMELX_BOVIN Amelogenin, X isoform OS=Bos taurus OX=9913 GN=AMELX PE=1 SV=2	1	hf1_10472_ebo_28_1_261219.ScanId;v=1;d1=25101.25101.4	controllerType=0 controllerNumber=1 scan=25101	51.4151
27533:3	1	S.MP[+15.995]LPPHPGHPGYINFS[+79.966]YEVLTPLK.W		P[+16], S[+80]	934.13	3	2800.38	2800.36	0	6.7	17	NRagged	262.26	262.26	5.8	5.92	1278	>sp|P02817|AMELX_BOVIN Amelogenin, X isoform OS=Bos taurus OX=9913 GN=AMELX PE=1 SV=2	1	hf1_10472_ebo_28_1_261219.ScanId;v=1;d1=20538.20538.3	controllerType=0 controllerNumber=1 scan=20538	43.4791
32534:4	1	S.MPLPPHPGHPGYINF[+31.990]SY[+31.990]EVLTPLK.W		F[+32], Y[+32]	692.845	4	2768.36	2768.38	0	-6.6	17	NRagged	263.75	263.75	11.95	4.53	1278	>sp|P02817|AMELX_BOVIN Amelogenin, X isoform OS=Bos taurus OX=9913 GN=AMELX PE=1 SV=2	1	hf1_10472_ebo_28_1_261219.ScanId;v=1;d1=23950.23950.4	controllerType=0 controllerNumber=1 scan=23950	49.4032
37325:4	1	S.MP[+15.995]LPPHPGHPGYINFS[+79.966]YEVLTPLK.W		P[+16], S[+80]	700.849	4	2800.37	2800.36	0	6	17	NRagged	270.09	270.09	5.8	5.95	1278	>sp|P02817|AMELX_BOVIN Amelogenin, X isoform OS=Bos taurus OX=9913 GN=AMELX PE=1 SV=2	1	hf1_10472_ebo_28_1_261219.ScanId;v=1;d1=27190.27190.4	controllerType=0 controllerNumber=1 scan=27190	55.112
36688:4	1	S.MP[+15.995]LPPHPGHPGYINFS[+79.966]YEVLTPLK.W		P[+16], S[+80]	700.85	4	2800.38	2800.36	0	7.3	17	NRagged	270.77	270.77	5.8	5.97	1278	>sp|P02817|AMELX_BOVIN Amelogenin, X isoform OS=Bos taurus OX=9913 GN=AMELX PE=1 SV=2	1	hf1_10472_ebo_28_1_261219.ScanId;v=1;d1=26770.26770.4	controllerType=0 controllerNumber=1 scan=26770	54.3707
40516:4	1	S.MP[+15.995]LPPHPGHPGYINFS[+79.966]YEVLTPLK.W		P[+16], S[+80]	700.849	4	2800.37	2800.36	0	5.7	17	NRagged	271.42	271.42	5.8	5.95	1278	>sp|P02817|AMELX_BOVIN Amelogenin, X isoform OS=Bos taurus OX=9913 GN=AMELX PE=1 SV=2	1	hf1_10472_ebo_28_1_261219.ScanId;v=1;d1=29290.29290.4	controllerType=0 controllerNumber=1 scan=29290	58.8403
45866:4	1	S.MP[+15.995]LPPHPGHPGYINFS[+79.966]YEVLTPLK.W		P[+16], S[+80]	700.848	4	2800.37	2800.36	0	5.4	17	NRagged	271.71	271.71	4	6.13	1278	>sp|P02817|AMELX_BOVIN Amelogenin, X isoform OS=Bos taurus OX=9913 GN=AMELX PE=1 SV=2	1	hf1_10472_ebo_28_1_261219.ScanId;v=1;d1=32868.32868.4	controllerType=0 controllerNumber=1 scan=32868	65.2695
41734:4	1	S.MP[+15.995]LPPHPGHPGYINFS[+79.966]YEVLTPLK.W		P[+16], S[+80]	700.85	4	2800.38	2800.36	0	7.3	17	NRagged	274.42	274.42	4	6.38	1278	>sp|P02817|AMELX_BOVIN Amelogenin, X isoform OS=Bos taurus OX=9913 GN=AMELX PE=1 SV=2	1	hf1_10472_ebo_28_1_261219.ScanId;v=1;d1=30089.30089.4	controllerType=0 controllerNumber=1 scan=30089	60.2604
49411:3	1	S.MP[+15.995]LPPHPGHPGYINFS[+79.966]YEVLTPLK.W		P[+16], S[+80]	934.13	3	2800.37	2800.36	0	6.4	17	NRagged	278.48	278.48	4	6.39	1278	>sp|P02817|AMELX_BOVIN Amelogenin, X isoform OS=Bos taurus OX=9913 GN=AMELX PE=1 SV=2	1	hf1_10472_ebo_28_1_261219.ScanId;v=1;d1=36124.36124.3	controllerType=0 controllerNumber=1 scan=36124	74.2462
39594:4	1	S.MP[+15.995]LPPHPGHPGYINFS[+79.966]YEVLTPLK.W		P[+16], S[+80]	700.849	4	2800.37	2800.36	0	6.3	17	NRagged	290.1	290.1	5.8	6.03	1278	>sp|P02817|AMELX_BOVIN Amelogenin, X isoform OS=Bos taurus OX=9913 GN=AMELX PE=1 SV=2	1	hf1_10472_ebo_28_1_261219.ScanId;v=1;d1=28689.28689.4	controllerType=0 controllerNumber=1 scan=28689	57.7724
49259:4	1	S.MP[+15.995]LPPHPGHPGYINFS[+79.966]YEVLTPLK.W		P[+16], S[+80]	700.849	4	2800.38	2800.36	0	6.7	17	NRagged	291.05	291.05	4	6.52	1278	>sp|P02817|AMELX_BOVIN Amelogenin, X isoform OS=Bos taurus OX=9913 GN=AMELX PE=1 SV=2	1	hf1_10472_ebo_28_1_261219.ScanId;v=1;d1=35998.35998.4	controllerType=0 controllerNumber=1 scan=35998	73.8924
28857:5	1	S.MP[+15.995]LPPHPGHPGYINFS[+79.966]YEVLTPLK.W		P[+16], S[+80]	560.88	5	2800.37	2800.36	0	5.3	17	NRagged	305.49	305.49	4	5.31	1278	>sp|P02817|AMELX_BOVIN Amelogenin, X isoform OS=Bos taurus OX=9913 GN=AMELX PE=1 SV=2	1	hf1_10472_ebo_28_1_261219.ScanId;v=1;d1=21432.21432.5	controllerType=0 controllerNumber=1 scan=21432	45.0203
40205:4	1	S.MP[+15.995]LPPHPGHPGYINFS[+79.966]YEVLTPLK.W		P[+16], S[+80]	700.85	4	2800.38	2800.36	0	6.9	17	NRagged	306.55	306.55	5.8	6.29	1278	>sp|P02817|AMELX_BOVIN Amelogenin, X isoform OS=Bos taurus OX=9913 GN=AMELX PE=1 SV=2	1	hf1_10472_ebo_28_1_261219.ScanId;v=1;d1=29087.29087.4	controllerType=0 controllerNumber=1 scan=29087	58.4818
46376:3	1	S.MP[+15.995]LPPHPGHPGYINFS[+79.966]YEVLTPLK.W		P[+16], S[+80]	934.129	3	2800.37	2800.36	0	5.6	17	NRagged	311.65	311.65	4	6.22	1278	>sp|P02817|AMELX_BOVIN Amelogenin, X isoform OS=Bos taurus OX=9913 GN=AMELX PE=1 SV=2	1	hf1_10472_ebo_28_1_261219.ScanId;v=1;d1=33309.33309.3	controllerType=0 controllerNumber=1 scan=33309	66.2225
29160:5	1	S.MP[+15.995]LPPHPGHPGYINFS[+79.966]YEVLTPLK.W		P[+16], S[+80]	560.88	5	2800.37	2800.36	0	4.2	17	NRagged	316.83	316.83	13.67	4.88	1278	>sp|P02817|AMELX_BOVIN Amelogenin, X isoform OS=Bos taurus OX=9913 GN=AMELX PE=1 SV=2	1	hf1_10472_ebo_28_1_261219.ScanId;v=1;d1=21636.21636.5	controllerType=0 controllerNumber=1 scan=21636	45.3781
32314:4	1	S.M[+15.995]PLPPHPGHPGYINFS[+79.966]YEVLTPLK.W		M[+16], S[+80]	700.849	4	2800.37	2800.36	0	6	17	NRagged	319	319	0.43	6.21	1278	>sp|P02817|AMELX_BOVIN Amelogenin, X isoform OS=Bos taurus OX=9913 GN=AMELX PE=1 SV=2	1	hf1_10472_ebo_28_1_261219.ScanId;v=1;d1=23804.23804.4	controllerType=0 controllerNumber=1 scan=23804	49.1471
42939:4	1	S.MP[+15.995]LPPHPGHPGYINFS[+79.966]YEVLTPLK.W		P[+16], S[+80]	700.85	4	2800.38	2800.36	0	7.2	17	NRagged	320.62	320.62	4	6.59	1278	>sp|P02817|AMELX_BOVIN Amelogenin, X isoform OS=Bos taurus OX=9913 GN=AMELX PE=1 SV=2	1	hf1_10472_ebo_28_1_261219.ScanId;v=1;d1=30883.30883.4	controllerType=0 controllerNumber=1 scan=30883	61.6749
42334:4	1	S.MP[+15.995]LPPHPGHPGYINFS[+79.966]YEVLTPLK.W		P[+16], S[+80]	700.849	4	2800.37	2800.36	0	5.7	17	NRagged	325.54	325.54	4	6.45	1278	>sp|P02817|AMELX_BOVIN Amelogenin, X isoform OS=Bos taurus OX=9913 GN=AMELX PE=1 SV=2	1	hf1_10472_ebo_28_1_261219.ScanId;v=1;d1=30490.30490.4	controllerType=0 controllerNumber=1 scan=30490	60.9711
37018:4	1	S.MP[+15.995]LPPHPGHPGYINFS[+79.966]YEVLTPLK.W		P[+16], S[+80]	700.85	4	2800.38	2800.36	0	7.5	17	NRagged	327.04	327.04	5.8	6.53	1278	>sp|P02817|AMELX_BOVIN Amelogenin, X isoform OS=Bos taurus OX=9913 GN=AMELX PE=1 SV=2	1	hf1_10472_ebo_28_1_261219.ScanId;v=1;d1=26988.26988.4	controllerType=0 controllerNumber=1 scan=26988	54.7548
38237:4	1	S.MP[+15.995]LPPHPGHPGYINFS[+79.966]YEVLTPLK.W		P[+16], S[+80]	700.848	4	2800.37	2800.36	0	5	17	NRagged	327.14	327.14	5.8	6.27	1278	>sp|P02817|AMELX_BOVIN Amelogenin, X isoform OS=Bos taurus OX=9913 GN=AMELX PE=1 SV=2	1	hf1_10472_ebo_28_1_261219.ScanId;v=1;d1=27789.27789.4	controllerType=0 controllerNumber=1 scan=27789	56.1715
42630:4	1	S.MP[+15.995]LPPHPGHPGYINFS[+79.966]YEVLTPLK.W		P[+16], S[+80]	700.849	4	2800.37	2800.36	0	6.2	17	NRagged	347.46	347.46	4	6.45	1278	>sp|P02817|AMELX_BOVIN Amelogenin, X isoform OS=Bos taurus OX=9913 GN=AMELX PE=1 SV=2	1	hf1_10472_ebo_28_1_261219.ScanId;v=1;d1=30684.30684.4	controllerType=0 controllerNumber=1 scan=30684	61.3168
40810:4	1	S.MP[+15.995]LPPHPGHPGYINFS[+79.966]YEVLTPLK.W		P[+16], S[+80]	700.85	4	2800.38	2800.36	0	8	17	NRagged	354.31	354.31	5.8	6.71	1278	>sp|P02817|AMELX_BOVIN Amelogenin, X isoform OS=Bos taurus OX=9913 GN=AMELX PE=1 SV=2	1	hf1_10472_ebo_28_1_261219.ScanId;v=1;d1=29489.29489.4	controllerType=0 controllerNumber=1 scan=29489	59.1935
41419:4	1	S.MP[+15.995]LPPHPGHPGYINFS[+79.966]YEVLTPLK.W		P[+16], S[+80]	700.849	4	2800.37	2800.36	0	6.4	17	NRagged	381.34	381.34	5.8	8.32	1278	>sp|P02817|AMELX_BOVIN Amelogenin, X isoform OS=Bos taurus OX=9913 GN=AMELX PE=1 SV=2	1	hf1_10472_ebo_28_1_261219.ScanId;v=1;d1=29886.29886.4	controllerType=0 controllerNumber=1 scan=29886	59.8983
37913:4	1	S.MP[+15.995]LPPHPGHPGYINFS[+79.966]YEVLTPLK.W		P[+16], S[+80]	700.85	4	2800.38	2800.36	0	7.1	17	NRagged	383.39	383.39	5.8	7.7	1278	>sp|P02817|AMELX_BOVIN Amelogenin, X isoform OS=Bos taurus OX=9913 GN=AMELX PE=1 SV=2	1	hf1_10472_ebo_28_1_261219.ScanId;v=1;d1=27584.27584.4	controllerType=0 controllerNumber=1 scan=27584	55.8101
32981:4	1	S.MP[+15.995]LPPHPGHPGYINFS[+79.966]YEVLTPLK.W		P[+16], S[+80]	700.849	4	2800.37	2800.36	0	6.4	17	NRagged	387.03	387.03	5.8	7.65	1278	>sp|P02817|AMELX_BOVIN Amelogenin, X isoform OS=Bos taurus OX=9913 GN=AMELX PE=1 SV=2	1	hf1_10472_ebo_28_1_261219.ScanId;v=1;d1=24247.24247.4	controllerType=0 controllerNumber=1 scan=24247	49.9226
27108:3	1	S.MP[+15.995]LPPHPGHPGYINFS[+79.966]YEVLTPLK.W		P[+16], S[+80]	934.13	3	2800.37	2800.36	0	6.2	17	NRagged	395.47	395.47	5.8	7.34	1278	>sp|P02817|AMELX_BOVIN Amelogenin, X isoform OS=Bos taurus OX=9913 GN=AMELX PE=1 SV=2	1	hf1_10472_ebo_28_1_261219.ScanId;v=1;d1=20254.20254.3	controllerType=0 controllerNumber=1 scan=20254	42.9894
29178:3	1	S.MPLPPHPGHPGYIN[+0.984]FS[+79.966]YEVLTPLK.W		N[+1], S[+80]	929.124	3	2785.36	2785.35	0	3.9	17	NRagged	400.24	400.24	118.02	7.18	1278	>sp|P02817|AMELX_BOVIN Amelogenin, X isoform OS=Bos taurus OX=9913 GN=AMELX PE=1 SV=2	1	hf1_10472_ebo_28_1_261219.ScanId;v=1;d1=21650.21650.3	controllerType=0 controllerNumber=1 scan=21650	45.4016
28863:4	1	S.MPLPPHPGHPGYIN[+0.984]FS[+79.966]YEVLTPLK.W		N[+1], S[+80]	697.091	4	2785.34	2785.35	0	-1.8	17	NRagged	400.85	400.85	124	6.42	1278	>sp|P02817|AMELX_BOVIN Amelogenin, X isoform OS=Bos taurus OX=9913 GN=AMELX PE=1 SV=2	1	hf1_10472_ebo_28_1_261219.ScanId;v=1;d1=21435.21435.4	controllerType=0 controllerNumber=1 scan=21435	45.0248
46020:3	1	S.MP[+15.995]LPPHPGHPGYINFS[+79.966]YEVLTPLK.W		P[+16], S[+80]	934.129	3	2800.37	2800.36	0	5	17	NRagged	402.59	402.59	4	8.05	1278	>sp|P02817|AMELX_BOVIN Amelogenin, X isoform OS=Bos taurus OX=9913 GN=AMELX PE=1 SV=2	1	hf1_10472_ebo_28_1_261219.ScanId;v=1;d1=32997.32997.3	controllerType=0 controllerNumber=1 scan=32997	65.5416
30126:4	1	S.MP[+31.990]LPPHPGHPGYINFS[+79.966]YEVLTPLK.W		P[+32], S[+80]	704.847	4	2816.37	2816.35	0	5.3	17	NRagged	403.75	403.75	1.8	7.42	1278	>sp|P02817|AMELX_BOVIN Amelogenin, X isoform OS=Bos taurus OX=9913 GN=AMELX PE=1 SV=2	1	hf1_10472_ebo_28_1_261219.ScanId;v=1;d1=22288.22288.4	controllerType=0 controllerNumber=1 scan=22288	46.5102
45835:3	1	S.MP[+15.995]LPPHPGHPGYINFS[+79.966]YEVLTPLK.W		P[+16], S[+80]	934.129	3	2800.37	2800.36	0	5.1	17	NRagged	426.84	426.84	4	8.05	1278	>sp|P02817|AMELX_BOVIN Amelogenin, X isoform OS=Bos taurus OX=9913 GN=AMELX PE=1 SV=2	1	hf1_10472_ebo_28_1_261219.ScanId;v=1;d1=32836.32836.3	controllerType=0 controllerNumber=1 scan=32836	65.1999
28404:4	1	S.M[+15.995]PLPPHPGHPGYIN[+0.984]FSYEVLTPLK.W		M[+16], N[+1]	681.105	4	2721.4	2721.37	0	8.9	17	NRagged	427.89	427.89	4.88	7.03	1278	>sp|P02817|AMELX_BOVIN Amelogenin, X isoform OS=Bos taurus OX=9913 GN=AMELX PE=1 SV=2	1	hf1_10472_ebo_28_1_261219.ScanId;v=1;d1=21124.21124.4	controllerType=0 controllerNumber=1 scan=21124	44.4923
42029:4	1	S.MP[+15.995]LPPHPGHPGYINFS[+79.966]YEVLTPLK.W		P[+16], S[+80]	700.849	4	2800.38	2800.36	0	6.6	17	NRagged	428.28	428.28	5.8	8.36	1278	>sp|P02817|AMELX_BOVIN Amelogenin, X isoform OS=Bos taurus OX=9913 GN=AMELX PE=1 SV=2	1	hf1_10472_ebo_28_1_261219.ScanId;v=1;d1=30285.30285.4	controllerType=0 controllerNumber=1 scan=30285	60.609
33967:4	1	S.MP[+15.995]LPPHPGHPGYINFS[+79.966]YEVLTPLK.W		P[+16], S[+80]	700.85	4	2800.38	2800.36	0	7.3	17	NRagged	430.75	430.75	5.8	7.73	1278	>sp|P02817|AMELX_BOVIN Amelogenin, X isoform OS=Bos taurus OX=9913 GN=AMELX PE=1 SV=2	1	hf1_10472_ebo_28_1_261219.ScanId;v=1;d1=24911.24911.4	controllerType=0 controllerNumber=1 scan=24911	51.0844
45147:4	1	S.MP[+15.995]LPPHPGHPGYINFS[+79.966]YEVLTPLK.W		P[+16], S[+80]	700.85	4	2800.38	2800.36	0	7.7	17	NRagged	443.31	443.31	4	8.34	1278	>sp|P02817|AMELX_BOVIN Amelogenin, X isoform OS=Bos taurus OX=9913 GN=AMELX PE=1 SV=2	1	hf1_10472_ebo_28_1_261219.ScanId;v=1;d1=32323.32323.4	controllerType=0 controllerNumber=1 scan=32323	64.2427
44546:4	1	S.MP[+15.995]LPPHPGHPGYINFS[+79.966]YEVLTPLK.W		P[+16], S[+80]	700.85	4	2800.38	2800.36	0	6.9	17	NRagged	449.46	449.46	4	8.34	1278	>sp|P02817|AMELX_BOVIN Amelogenin, X isoform OS=Bos taurus OX=9913 GN=AMELX PE=1 SV=2	1	hf1_10472_ebo_28_1_261219.ScanId;v=1;d1=31929.31929.4	controllerType=0 controllerNumber=1 scan=31929	63.5418
46201:3	1	S.M[+15.995]PLPPHPGHPGYINFS[+79.966]YEVLTPLK.W		M[+16], S[+80]	934.128	3	2800.37	2800.36	0	4.3	17	NRagged	457.27	457.27	10.11	7.78	1278	>sp|P02817|AMELX_BOVIN Amelogenin, X isoform OS=Bos taurus OX=9913 GN=AMELX PE=1 SV=2	1	hf1_10472_ebo_28_1_261219.ScanId;v=1;d1=33150.33150.3	controllerType=0 controllerNumber=1 scan=33150	65.8778
30324:3	1	S.MP[+31.990]LPPHPGHPGYINFS[+79.966]YEVLTPLK.W		P[+32], S[+80]	939.462	3	2816.37	2816.35	0	7.1	17	NRagged	472.4	472.4	1.8	7.61	1278	>sp|P02817|AMELX_BOVIN Amelogenin, X isoform OS=Bos taurus OX=9913 GN=AMELX PE=1 SV=2	1	hf1_10472_ebo_28_1_261219.ScanId;v=1;d1=22421.22421.3	controllerType=0 controllerNumber=1 scan=22421	46.7386
45424:4	1	S.MP[+15.995]LPPHPGHPGYINFS[+79.966]YEVLTPLK.W		P[+16], S[+80]	700.849	4	2800.37	2800.36	0	6.4	17	NRagged	488.64	488.64	4	8.42	1278	>sp|P02817|AMELX_BOVIN Amelogenin, X isoform OS=Bos taurus OX=9913 GN=AMELX PE=1 SV=2	1	hf1_10472_ebo_28_1_261219.ScanId;v=1;d1=32515.32515.4	controllerType=0 controllerNumber=1 scan=32515	64.5842
32017:4	1	S.MP[+15.995]LPPHPGHPGYINFS[+79.966]YEVLTPLK.W		P[+16], S[+80]	700.848	4	2800.37	2800.36	0	4.6	17	NRagged	496.62	496.62	4.23	8.16	1278	>sp|P02817|AMELX_BOVIN Amelogenin, X isoform OS=Bos taurus OX=9913 GN=AMELX PE=1 SV=2	1	hf1_10472_ebo_28_1_261219.ScanId;v=1;d1=23599.23599.4	controllerType=0 controllerNumber=1 scan=23599	48.7889
37389:3	1	S.M[+15.995]PLPPHPGHPGYINFS[+79.966]YEVLTPLK.W		M[+16], S[+80]	934.129	3	2800.37	2800.36	0	5.3	17	NRagged	515.77	515.77	18.39	7.49	1278	>sp|P02817|AMELX_BOVIN Amelogenin, X isoform OS=Bos taurus OX=9913 GN=AMELX PE=1 SV=2	1	hf1_10472_ebo_28_1_261219.ScanId;v=1;d1=27230.27230.3	controllerType=0 controllerNumber=1 scan=27230	55.181
31730:4	1	S.MP[+15.995]LPPHPGHPGYINFS[+79.966]YEVLTPLK.W		P[+16], S[+80]	700.848	4	2800.37	2800.36	0	5.5	17	NRagged	531.69	531.69	5.8	8.27	1278	>sp|P02817|AMELX_BOVIN Amelogenin, X isoform OS=Bos taurus OX=9913 GN=AMELX PE=1 SV=2	1	hf1_10472_ebo_28_1_261219.ScanId;v=1;d1=23398.23398.4	controllerType=0 controllerNumber=1 scan=23398	48.4346
45625:3	1	S.M[+15.995]PLPPHPGHPGYINFS[+79.966]YEVLTPLK.W		M[+16], S[+80]	934.129	3	2800.37	2800.36	0	5.8	17	NRagged	535.5	535.5	13.9	8.22	1278	>sp|P02817|AMELX_BOVIN Amelogenin, X isoform OS=Bos taurus OX=9913 GN=AMELX PE=1 SV=2	1	hf1_10472_ebo_28_1_261219.ScanId;v=1;d1=32662.32662.3	controllerType=0 controllerNumber=1 scan=32662	64.8541
44855:4	1	S.MP[+15.995]LPPHPGHPGYINFS[+79.966]YEVLTPLK.W		P[+16], S[+80]	700.849	4	2800.37	2800.36	0	6.1	17	NRagged	541.21	541.21	5.8	8.27	1278	>sp|P02817|AMELX_BOVIN Amelogenin, X isoform OS=Bos taurus OX=9913 GN=AMELX PE=1 SV=2	1	hf1_10472_ebo_28_1_261219.ScanId;v=1;d1=32126.32126.4	controllerType=0 controllerNumber=1 scan=32126	63.8935
31320:4	1	S.MP[+15.995]LPPHPGHPGYINFS[+79.966]YEVLTPLK.W		P[+16], S[+80]	700.843	4	2800.35	2800.36	0	-2.4	17	NRagged	546.12	546.12	5.8	6.64	1278	>sp|P02817|AMELX_BOVIN Amelogenin, X isoform OS=Bos taurus OX=9913 GN=AMELX PE=1 SV=2	1	hf1_10472_ebo_28_1_261219.ScanId;v=1;d1=23109.23109.4	controllerType=0 controllerNumber=1 scan=23109	47.9362
40972:3	1	S.M[+15.995]PLPPHPGHPGYINFS[+79.966]YEVLTPLK.W		M[+16], S[+80]	934.13	3	2800.38	2800.36	0	6.7	17	NRagged	548.42	548.42	22.76	7.85	1278	>sp|P02817|AMELX_BOVIN Amelogenin, X isoform OS=Bos taurus OX=9913 GN=AMELX PE=1 SV=2	1	hf1_10472_ebo_28_1_261219.ScanId;v=1;d1=29597.29597.3	controllerType=0 controllerNumber=1 scan=29597	59.3859
42956:3	1	S.M[+15.995]PLPPHPGHPGYINFS[+79.966]YEVLTPLK.W		M[+16], S[+80]	934.13	3	2800.38	2800.36	0	7	17	NRagged	579.63	579.63	10.55	9.27	1278	>sp|P02817|AMELX_BOVIN Amelogenin, X isoform OS=Bos taurus OX=9913 GN=AMELX PE=1 SV=2	1	hf1_10472_ebo_28_1_261219.ScanId;v=1;d1=30894.30894.3	controllerType=0 controllerNumber=1 scan=30894	61.6945
44766:3	1	S.M[+15.995]PLPPHPGHPGYINFS[+79.966]YEVLTPLK.W		M[+16], S[+80]	934.13	3	2800.38	2800.36	0	6.6	17	NRagged	582.3	582.3	9.83	9.27	1278	>sp|P02817|AMELX_BOVIN Amelogenin, X isoform OS=Bos taurus OX=9913 GN=AMELX PE=1 SV=2	1	hf1_10472_ebo_28_1_261219.ScanId;v=1;d1=32070.32070.3	controllerType=0 controllerNumber=1 scan=32070	63.794
42642:3	1	S.M[+15.995]PLPPHPGHPGYINFS[+79.966]YEVLTPLK.W		M[+16], S[+80]	934.131	3	2800.38	2800.36	0	7.9	17	NRagged	595.23	595.23	19.54	9.27	1278	>sp|P02817|AMELX_BOVIN Amelogenin, X isoform OS=Bos taurus OX=9913 GN=AMELX PE=1 SV=2	1	hf1_10472_ebo_28_1_261219.ScanId;v=1;d1=30692.30692.3	controllerType=0 controllerNumber=1 scan=30692	61.3318
28451:3	1	S.M[+15.995]PLPPHPGHPGYINFS[+79.966]YEVLTPLK.W		M[+16], S[+80]	934.128	3	2800.37	2800.36	0	4	17	NRagged	608.19	608.19	17.18	9.14	1278	>sp|P02817|AMELX_BOVIN Amelogenin, X isoform OS=Bos taurus OX=9913 GN=AMELX PE=1 SV=2	1	hf1_10472_ebo_28_1_261219.ScanId;v=1;d1=21156.21156.3	controllerType=0 controllerNumber=1 scan=21156	44.548
40603:3	1	S.M[+15.995]PLPPHPGHPGYINFS[+79.966]YEVLTPLK.W		M[+16], S[+80]	934.131	3	2800.38	2800.36	0	7.3	17	NRagged	608.46	608.46	24.51	10.27	1278	>sp|P02817|AMELX_BOVIN Amelogenin, X isoform OS=Bos taurus OX=9913 GN=AMELX PE=1 SV=2	1	hf1_10472_ebo_28_1_261219.ScanId;v=1;d1=29349.29349.3	controllerType=0 controllerNumber=1 scan=29349	58.9469
29868:4	1	S.MP[+15.995]LPPHPGHPGYINFS[+79.966]YEVLTPLK.W		P[+16], S[+80]	700.847	4	2800.37	2800.36	0	4	17	NRagged	637.4	637.4	4	9.81	1278	>sp|P02817|AMELX_BOVIN Amelogenin, X isoform OS=Bos taurus OX=9913 GN=AMELX PE=1 SV=2	1	hf1_10472_ebo_28_1_261219.ScanId;v=1;d1=22114.22114.4	controllerType=0 controllerNumber=1 scan=22114	46.208
31021:4	1	S.MP[+15.995]LPPHPGHPGYINFS[+79.966]YEVLTPLK.W		P[+16], S[+80]	700.847	4	2800.37	2800.36	0	3.3	17	NRagged	640.09	640.09	5.8	9.81	1278	>sp|P02817|AMELX_BOVIN Amelogenin, X isoform OS=Bos taurus OX=9913 GN=AMELX PE=1 SV=2	1	hf1_10472_ebo_28_1_261219.ScanId;v=1;d1=22912.22912.4	controllerType=0 controllerNumber=1 scan=22912	47.5917
43573:3	1	S.M[+15.995]PLPPHPGHPGYINFS[+79.966]YEVLTPLK.W		M[+16], S[+80]	934.13	3	2800.37	2800.36	0	6.1	17	NRagged	640.12	640.12	22.56	10.01	1278	>sp|P02817|AMELX_BOVIN Amelogenin, X isoform OS=Bos taurus OX=9913 GN=AMELX PE=1 SV=2	1	hf1_10472_ebo_28_1_261219.ScanId;v=1;d1=31288.31288.3	controllerType=0 controllerNumber=1 scan=31288	62.3971
29727:2	1	S.M[+15.995]PLPPHPGHPGYINFS[+79.966]YEVLTPLK.W		M[+16], S[+80]	1400.69	2	2800.37	2800.36	0	5.7	17	NRagged	641.79	641.79	45.37	8.52	1278	>sp|P02817|AMELX_BOVIN Amelogenin, X isoform OS=Bos taurus OX=9913 GN=AMELX PE=1 SV=2	1	hf1_10472_ebo_28_1_261219.ScanId;v=1;d1=22021.22021.2	controllerType=0 controllerNumber=1 scan=22021	46.0446
39355:3	1	S.M[+15.995]PLPPHPGHPGYINFS[+79.966]YEVLTPLK.W		M[+16], S[+80]	934.13	3	2800.38	2800.36	0	6.5	17	NRagged	644.42	644.42	4.74	10.27	1278	>sp|P02817|AMELX_BOVIN Amelogenin, X isoform OS=Bos taurus OX=9913 GN=AMELX PE=1 SV=2	1	hf1_10472_ebo_28_1_261219.ScanId;v=1;d1=28532.28532.3	controllerType=0 controllerNumber=1 scan=28532	57.495
30171:4	1	S.MP[+15.995]LPPHPGHPGYINFS[+79.966]YEVLTPLK.W		P[+16], S[+80]	700.847	4	2800.37	2800.36	0	3	17	NRagged	645.07	645.07	5.8	9.81	1278	>sp|P02817|AMELX_BOVIN Amelogenin, X isoform OS=Bos taurus OX=9913 GN=AMELX PE=1 SV=2	1	hf1_10472_ebo_28_1_261219.ScanId;v=1;d1=22316.22316.4	controllerType=0 controllerNumber=1 scan=22316	46.56
34189:3	1	S.M[+15.995]PLPPHPGHPGYINFS[+79.966]YEVLTPLK.W		M[+16], S[+80]	934.128	3	2800.37	2800.36	0	4.6	17	NRagged	657.72	657.72	7.31	11.01	1278	>sp|P02817|AMELX_BOVIN Amelogenin, X isoform OS=Bos taurus OX=9913 GN=AMELX PE=1 SV=2	1	hf1_10472_ebo_28_1_261219.ScanId;v=1;d1=25057.25057.3	controllerType=0 controllerNumber=1 scan=25057	51.3377
39862:3	1	S.M[+15.995]PLPPHPGHPGYINFS[+79.966]YEVLTPLK.W		M[+16], S[+80]	934.13	3	2800.38	2800.36	0	6.6	17	NRagged	661.96	661.96	22.61	11.27	1278	>sp|P02817|AMELX_BOVIN Amelogenin, X isoform OS=Bos taurus OX=9913 GN=AMELX PE=1 SV=2	1	hf1_10472_ebo_28_1_261219.ScanId;v=1;d1=28864.28864.3	controllerType=0 controllerNumber=1 scan=28864	58.0842
41585:3	1	S.M[+15.995]PLPPHPGHPGYINFS[+79.966]YEVLTPLK.W		M[+16], S[+80]	934.13	3	2800.38	2800.36	0	6.9	17	NRagged	673.42	673.42	21.73	11.27	1278	>sp|P02817|AMELX_BOVIN Amelogenin, X isoform OS=Bos taurus OX=9913 GN=AMELX PE=1 SV=2	1	hf1_10472_ebo_28_1_261219.ScanId;v=1;d1=29993.29993.3	controllerType=0 controllerNumber=1 scan=29993	60.0891
39058:3	1	S.M[+15.995]PLPPHPGHPGYINFS[+79.966]YEVLTPLK.W		M[+16], S[+80]	934.129	3	2800.37	2800.36	0	5.4	17	NRagged	674.42	674.42	33.37	11.01	1278	>sp|P02817|AMELX_BOVIN Amelogenin, X isoform OS=Bos taurus OX=9913 GN=AMELX PE=1 SV=2	1	hf1_10472_ebo_28_1_261219.ScanId;v=1;d1=28335.28335.3	controllerType=0 controllerNumber=1 scan=28335	57.1439
30734:4	1	S.MPLPPHPGH[+15.995]PGYINFS[+79.966]YEVLTPLK.W		H[+16], S[+80]	700.847	4	2800.37	2800.36	0	3.5	17	NRagged	683.46	683.46	1.7	10.81	1278	>sp|P02817|AMELX_BOVIN Amelogenin, X isoform OS=Bos taurus OX=9913 GN=AMELX PE=1 SV=2	1	hf1_10472_ebo_28_1_261219.ScanId;v=1;d1=22713.22713.4	controllerType=0 controllerNumber=1 scan=22713	47.2464
41268:3	1	S.M[+15.995]PLPPHPGHPGYINFS[+79.966]YEVLTPLK.W		M[+16], S[+80]	934.13	3	2800.37	2800.36	0	6.4	17	NRagged	687.2	687.2	29.24	11.27	1278	>sp|P02817|AMELX_BOVIN Amelogenin, X isoform OS=Bos taurus OX=9913 GN=AMELX PE=1 SV=2	1	hf1_10472_ebo_28_1_261219.ScanId;v=1;d1=29789.29789.3	controllerType=0 controllerNumber=1 scan=29789	59.7282
45374:3	1	S.M[+15.995]PLPPHPGHPGYINFS[+79.966]YEVLTPLK.W		M[+16], S[+80]	934.13	3	2800.37	2800.36	0	6.2	17	NRagged	694.36	694.36	25.51	11.01	1278	>sp|P02817|AMELX_BOVIN Amelogenin, X isoform OS=Bos taurus OX=9913 GN=AMELX PE=1 SV=2	1	hf1_10472_ebo_28_1_261219.ScanId;v=1;d1=32477.32477.3	controllerType=0 controllerNumber=1 scan=32477	64.5156
42263:3	1	S.M[+15.995]PLPPHPGHPGYINFS[+79.966]YEVLTPLK.W		M[+16], S[+80]	934.129	3	2800.37	2800.36	0	6	17	NRagged	694.65	694.65	19.45	11.01	1278	>sp|P02817|AMELX_BOVIN Amelogenin, X isoform OS=Bos taurus OX=9913 GN=AMELX PE=1 SV=2	1	hf1_10472_ebo_28_1_261219.ScanId;v=1;d1=30441.30441.3	controllerType=0 controllerNumber=1 scan=30441	60.8854
43863:3	1	S.M[+15.995]PLPPHPGHPGYINFS[+79.966]YEVLTPLK.W		M[+16], S[+80]	934.13	3	2800.37	2800.36	0	6.4	17	NRagged	702.42	702.42	29.16	12.01	1278	>sp|P02817|AMELX_BOVIN Amelogenin, X isoform OS=Bos taurus OX=9913 GN=AMELX PE=1 SV=2	1	hf1_10472_ebo_28_1_261219.ScanId;v=1;d1=31480.31480.3	controllerType=0 controllerNumber=1 scan=31480	62.7403
40313:3	1	S.M[+15.995]PLPPHPGHPGYINFS[+79.966]YEVLTPLK.W		M[+16], S[+80]	934.13	3	2800.38	2800.36	0	6.7	17	NRagged	703.5	703.5	25.05	12.27	1278	>sp|P02817|AMELX_BOVIN Amelogenin, X isoform OS=Bos taurus OX=9913 GN=AMELX PE=1 SV=2	1	hf1_10472_ebo_28_1_261219.ScanId;v=1;d1=29157.29157.3	controllerType=0 controllerNumber=1 scan=29157	58.605
29568:4	1	S.MP[+15.995]LPPHPGHPGYINFS[+79.966]YEVLTPLK.W		P[+16], S[+80]	700.85	4	2800.38	2800.36	0	7.1	17	NRagged	705.15	705.15	4	12.31	1278	>sp|P02817|AMELX_BOVIN Amelogenin, X isoform OS=Bos taurus OX=9913 GN=AMELX PE=1 SV=2	1	hf1_10472_ebo_28_1_261219.ScanId;v=1;d1=21916.21916.4	controllerType=0 controllerNumber=1 scan=21916	45.8659
30446:4	1	S.MPLPPHPGHPGY[+15.995]INFS[+79.966]YEVLTPLK.W		S[+80], Y[+16]	700.848	4	2800.37	2800.36	0	5	17	NRagged	708.98	708.98	0.92	12.06	1278	>sp|P02817|AMELX_BOVIN Amelogenin, X isoform OS=Bos taurus OX=9913 GN=AMELX PE=1 SV=2	1	hf1_10472_ebo_28_1_261219.ScanId;v=1;d1=22514.22514.4	controllerType=0 controllerNumber=1 scan=22514	46.9027
28999:4	1	S.M[+15.995]PLPPHPGHPGYINFS[+79.966]YEVLTPLK.W		M[+16], S[+80]	700.848	4	2800.37	2800.36	0	5	17	NRagged	711.89	711.89	7.27	12.06	1278	>sp|P02817|AMELX_BOVIN Amelogenin, X isoform OS=Bos taurus OX=9913 GN=AMELX PE=1 SV=2	1	hf1_10472_ebo_28_1_261219.ScanId;v=1;d1=21525.21525.4	controllerType=0 controllerNumber=1 scan=21525	45.1833
49163:4	1	S.MP[+15.995]LPPHPGHPGYINFS[+79.966]YEVLTPLK.W		P[+16], S[+80]	700.849	4	2800.38	2800.36	0	6.6	17	NRagged	713.65	713.65	5.8	12.31	1278	>sp|P02817|AMELX_BOVIN Amelogenin, X isoform OS=Bos taurus OX=9913 GN=AMELX PE=1 SV=2	1	hf1_10472_ebo_28_1_261219.ScanId;v=1;d1=35898.35898.4	controllerType=0 controllerNumber=1 scan=35898	73.5532
45088:3	1	S.M[+15.995]PLPPHPGHPGYINFS[+79.966]YEVLTPLK.W		M[+16], S[+80]	934.129	3	2800.37	2800.36	0	5.7	17	NRagged	725.04	725.04	33.12	12.01	1278	>sp|P02817|AMELX_BOVIN Amelogenin, X isoform OS=Bos taurus OX=9913 GN=AMELX PE=1 SV=2	1	hf1_10472_ebo_28_1_261219.ScanId;v=1;d1=32284.32284.3	controllerType=0 controllerNumber=1 scan=32284	64.1723
33829:3	1	S.M[+15.995]PLPPHPGHPGYINFS[+79.966]YEVLTPLK.W		M[+16], S[+80]	934.129	3	2800.37	2800.36	0	6	17	NRagged	736.28	736.28	18.97	12.01	1278	>sp|P02817|AMELX_BOVIN Amelogenin, X isoform OS=Bos taurus OX=9913 GN=AMELX PE=1 SV=2	1	hf1_10472_ebo_28_1_261219.ScanId;v=1;d1=24824.24824.3	controllerType=0 controllerNumber=1 scan=24824	50.9326
29283:4	1	S.M[+15.995]PLPPHPGHPGYINFS[+79.966]YEVLTPLK.W		M[+16], S[+80]	700.849	4	2800.37	2800.36	0	5.8	17	NRagged	736.6	736.6	7.45	12.06	1278	>sp|P02817|AMELX_BOVIN Amelogenin, X isoform OS=Bos taurus OX=9913 GN=AMELX PE=1 SV=2	1	hf1_10472_ebo_28_1_261219.ScanId;v=1;d1=21721.21721.4	controllerType=0 controllerNumber=1 scan=21721	45.5263
43271:3	1	S.M[+15.995]PLPPHPGHPGYINFS[+79.966]YEVLTPLK.W		M[+16], S[+80]	934.13	3	2800.38	2800.36	0	6.8	17	NRagged	737.86	737.86	25.58	12.27	1278	>sp|P02817|AMELX_BOVIN Amelogenin, X isoform OS=Bos taurus OX=9913 GN=AMELX PE=1 SV=2	1	hf1_10472_ebo_28_1_261219.ScanId;v=1;d1=31095.31095.3	controllerType=0 controllerNumber=1 scan=31095	62.0522
31563:4	1	S.MPLPPHPGHPGYIN[+0.984]FS[+79.966]YEVLTPLK.W		N[+1], S[+80]	697.096	4	2785.36	2785.35	0	6.3	17	NRagged	747.4	747.4	399.54	12.06	1278	>sp|P02817|AMELX_BOVIN Amelogenin, X isoform OS=Bos taurus OX=9913 GN=AMELX PE=1 SV=2	1	hf1_10472_ebo_28_1_261219.ScanId;v=1;d1=23283.23283.4	controllerType=0 controllerNumber=1 scan=23283	48.238
31851:4	1	S.MPLPPHPGHPGYIN[+0.984]FS[+79.966]YEVLTPLK.W		N[+1], S[+80]	697.097	4	2785.36	2785.35	0	6.8	17	NRagged	752.52	752.52	401.26	13.31	1278	>sp|P02817|AMELX_BOVIN Amelogenin, X isoform OS=Bos taurus OX=9913 GN=AMELX PE=1 SV=2	1	hf1_10472_ebo_28_1_261219.ScanId;v=1;d1=23482.23482.4	controllerType=0 controllerNumber=1 scan=23482	48.5814
29686:3	1	S.MP[+31.990]LPPHPGHPGYINFS[+79.966]YEVLTPLK.W		P[+32], S[+80]	939.461	3	2816.37	2816.35	0	6.2	17	NRagged	774.57	774.57	0	13.01	1278	>sp|P02817|AMELX_BOVIN Amelogenin, X isoform OS=Bos taurus OX=9913 GN=AMELX PE=1 SV=2	1	hf1_10472_ebo_28_1_261219.ScanId;v=1;d1=21995.21995.3	controllerType=0 controllerNumber=1 scan=21995	46.0023
29421:2	1	S.M[+15.995]PLPPHPGHPGYINFS[+79.966]YEVLTPLK.W		M[+16], S[+80]	1400.7	2	2800.38	2800.36	0	9.3	17	NRagged	787.45	787.45	58.69	11.7	1278	>sp|P02817|AMELX_BOVIN Amelogenin, X isoform OS=Bos taurus OX=9913 GN=AMELX PE=1 SV=2	1	hf1_10472_ebo_28_1_261219.ScanId;v=1;d1=21819.21819.2	controllerType=0 controllerNumber=1 scan=21819	45.6958
29126:2	1	S.M[+15.995]PLPPHPGHPGYINFS[+79.966]YEVLTPLK.W		M[+16], S[+80]	1400.69	2	2800.37	2800.36	0	5.1	17	NRagged	807.36	807.36	52.11	13.15	1278	>sp|P02817|AMELX_BOVIN Amelogenin, X isoform OS=Bos taurus OX=9913 GN=AMELX PE=1 SV=2	1	hf1_10472_ebo_28_1_261219.ScanId;v=1;d1=21614.21614.2	controllerType=0 controllerNumber=1 scan=21614	45.3398
44458:3	1	S.M[+15.995]PLPPHPGHPGYINFS[+79.966]YEVLTPLK.W		M[+16], S[+80]	934.13	3	2800.38	2800.36	0	7.2	17	NRagged	850.98	850.98	31.1	15.27	1278	>sp|P02817|AMELX_BOVIN Amelogenin, X isoform OS=Bos taurus OX=9913 GN=AMELX PE=1 SV=2	1	hf1_10472_ebo_28_1_261219.ScanId;v=1;d1=31872.31872.3	controllerType=0 controllerNumber=1 scan=31872	63.4408
31383:3	1	S.M[+15.995]PLPPHPGHPGYINFS[+79.966]YEVLTPLK.W		M[+16], S[+80]	934.127	3	2800.37	2800.36	0	3.9	17	NRagged	879.31	879.31	36.8	14.76	1278	>sp|P02817|AMELX_BOVIN Amelogenin, X isoform OS=Bos taurus OX=9913 GN=AMELX PE=1 SV=2	1	hf1_10472_ebo_28_1_261219.ScanId;v=1;d1=23155.23155.3	controllerType=0 controllerNumber=1 scan=23155	48.0146
44153:3	1	S.M[+15.995]PLPPHPGHPGYINFS[+79.966]YEVLTPLK.W		M[+16], S[+80]	934.129	3	2800.37	2800.36	0	5.5	17	NRagged	889.92	889.92	28.74	15.01	1278	>sp|P02817|AMELX_BOVIN Amelogenin, X isoform OS=Bos taurus OX=9913 GN=AMELX PE=1 SV=2	1	hf1_10472_ebo_28_1_261219.ScanId;v=1;d1=31674.31674.3	controllerType=0 controllerNumber=1 scan=31674	63.0888
30798:3	1	S.M[+15.995]PLPPHPGHPGYINFS[+79.966]YEVLTPLK.W		M[+16], S[+80]	934.126	3	2800.36	2800.36	0	2.7	17	NRagged	928.09	928.09	9.55	15.76	1278	>sp|P02817|AMELX_BOVIN Amelogenin, X isoform OS=Bos taurus OX=9913 GN=AMELX PE=1 SV=2	1	hf1_10472_ebo_28_1_261219.ScanId;v=1;d1=22756.22756.3	controllerType=0 controllerNumber=1 scan=22756	47.3211
30510:3	1	S.MPLPPHPGH[+15.995]PGYINFS[+79.966]YEVLTPLK.W		H[+16], S[+80]	934.129	3	2800.37	2800.36	0	5.3	17	NRagged	945.24	945.24	11.56	16.01	1278	>sp|P02817|AMELX_BOVIN Amelogenin, X isoform OS=Bos taurus OX=9913 GN=AMELX PE=1 SV=2	1	hf1_10472_ebo_28_1_261219.ScanId;v=1;d1=22558.22558.3	controllerType=0 controllerNumber=1 scan=22558	46.9801
31087:3	1	S.M[+15.995]PLPPHPGHPGYINFS[+79.966]YEVLTPLK.W		M[+16], S[+80]	934.126	3	2800.36	2800.36	0	2.3	17	NRagged	947.23	947.23	8.24	15.13	1278	>sp|P02817|AMELX_BOVIN Amelogenin, X isoform OS=Bos taurus OX=9913 GN=AMELX PE=1 SV=2	1	hf1_10472_ebo_28_1_261219.ScanId;v=1;d1=22954.22954.3	controllerType=0 controllerNumber=1 scan=22954	47.6661
49175:3	1	S.M[+15.995]PLPPHPGHPGYINFS[+79.966]YEVLTPLK.W		M[+16], S[+80]	934.132	3	2800.38	2800.36	0	8.4	17	NRagged	1056.63	1056.63	60.49	18.56	1278	>sp|P02817|AMELX_BOVIN Amelogenin, X isoform OS=Bos taurus OX=9913 GN=AMELX PE=1 SV=2	1	hf1_10472_ebo_28_1_261219.ScanId;v=1;d1=35907.35907.3	controllerType=0 controllerNumber=1 scan=35907	73.5694
29341:3	1	S.M[+15.995]PLPPHPGHPGYINFS[+79.966]YEVLTPLK.W		M[+16], S[+80]	934.129	3	2800.37	2800.36	0	5.8	17	NRagged	1056.86	1056.86	51.24	19.01	1278	>sp|P02817|AMELX_BOVIN Amelogenin, X isoform OS=Bos taurus OX=9913 GN=AMELX PE=1 SV=2	1	hf1_10472_ebo_28_1_261219.ScanId;v=1;d1=21762.21762.3	controllerType=0 controllerNumber=1 scan=21762	45.6012
29065:3	1	S.M[+15.995]PLPPHPGHPGYINFS[+79.966]YEVLTPLK.W		M[+16], S[+80]	934.128	3	2800.37	2800.36	0	5	17	NRagged	1070.98	1070.98	59.71	19.01	1278	>sp|P02817|AMELX_BOVIN Amelogenin, X isoform OS=Bos taurus OX=9913 GN=AMELX PE=1 SV=2	1	hf1_10472_ebo_28_1_261219.ScanId;v=1;d1=21567.21567.3	controllerType=0 controllerNumber=1 scan=21567	45.2602
32112:3	1	S.MPLPPHPGHPGYIN[+0.984]FS[+79.966]YEVLTPLK.W		N[+1], S[+80]	929.128	3	2785.37	2785.35	0	8.7	17	NRagged	1076.65	1076.65	451.21	18.56	1278	>sp|P02817|AMELX_BOVIN Amelogenin, X isoform OS=Bos taurus OX=9913 GN=AMELX PE=1 SV=2	1	hf1_10472_ebo_28_1_261219.ScanId;v=1;d1=23668.23668.3	controllerType=0 controllerNumber=1 scan=23668	48.9107
29633:3	1	S.M[+15.995]PLPPHPGHPGYINFS[+79.966]YEVLTPLK.W		M[+16], S[+80]	934.13	3	2800.38	2800.36	0	6.9	17	NRagged	1090.63	1090.63	46.2	19.27	1278	>sp|P02817|AMELX_BOVIN Amelogenin, X isoform OS=Bos taurus OX=9913 GN=AMELX PE=1 SV=2	1	hf1_10472_ebo_28_1_261219.ScanId;v=1;d1=21960.21960.3	controllerType=0 controllerNumber=1 scan=21960	45.9424
31836:3	1	S.MPLPPHPGHPGYIN[+0.984]FS[+79.966]YEVLTPLK.W		N[+1], S[+80]	929.127	3	2785.37	2785.35	0	6.9	17	NRagged	1112.08	1112.08	550.35	20.27	1278	>sp|P02817|AMELX_BOVIN Amelogenin, X isoform OS=Bos taurus OX=9913 GN=AMELX PE=1 SV=2	1	hf1_10472_ebo_28_1_261219.ScanId;v=1;d1=23470.23470.3	controllerType=0 controllerNumber=1 scan=23470	48.561
31548:3	1	S.MPLPPHPGHPGYIN[+0.984]FS[+79.966]YEVLTPLK.W		N[+1], S[+80]	929.126	3	2785.36	2785.35	0	6.2	17	NRagged	1195.13	1195.13	579.88	21.01	1278	>sp|P02817|AMELX_BOVIN Amelogenin, X isoform OS=Bos taurus OX=9913 GN=AMELX PE=1 SV=2	1	hf1_10472_ebo_28_1_261219.ScanId;v=1;d1=23272.23272.3	controllerType=0 controllerNumber=1 scan=23272	48.2192
47886:4	1	S.MPLP[+15.995]PHPGHP[+31.990]GYINF[+31.990]SYEVLTPLK.W		F[+32], P[+16][+32]	696.85	4	2784.38	2784.37	0	3.2	17	NRagged	6.52	6.52	0	2.58	1278	>sp|P02817|AMELX_BOVIN Amelogenin, X isoform OS=Bos taurus OX=9913 GN=AMELX PE=1 SV=2	1	hf1_10472_ebo_28_1_261219.ScanId;v=1;d1=34661.34661.4	controllerType=0 controllerNumber=1 scan=34661	69.8593
35400:4	1	S.MPLPPHP[+31.990]GHPGYINF[+31.990]SY[+15.995]EVLTPLK.W		F[+32], P[+32], Y[+16]	696.85	4	2784.38	2784.37	0	3.4	17	NRagged	13.44	13.44	1.5	1.04	1278	>sp|P02817|AMELX_BOVIN Amelogenin, X isoform OS=Bos taurus OX=9913 GN=AMELX PE=1 SV=2	1	hf1_10472_ebo_28_1_261219.ScanId;v=1;d1=25886.25886.4	controllerType=0 controllerNumber=1 scan=25886	52.7978
46775:4	1	S.MPLP[+15.995]PHPGHPGY[+31.990]INF[+31.990]SYEVLTPLK.W		F[+32], P[+16], Y[+32]	696.849	4	2784.37	2784.37	0	0.9	17	NRagged	13.72	13.72	0	2.21	1278	>sp|P02817|AMELX_BOVIN Amelogenin, X isoform OS=Bos taurus OX=9913 GN=AMELX PE=1 SV=2	1	hf1_10472_ebo_28_1_261219.ScanId;v=1;d1=33688.33688.4	controllerType=0 controllerNumber=1 scan=33688	67.236
33301:3	1	S.MPLPPHPGHP[+31.990]GY[+31.990]INF[+15.995]SYEVLTPLK.W		F[+16], P[+32], Y[+32]	928.797	3	2784.38	2784.37	0	2.3	17	NRagged	15.29	15.29	2	0.91	1278	>sp|P02817|AMELX_BOVIN Amelogenin, X isoform OS=Bos taurus OX=9913 GN=AMELX PE=1 SV=2	1	hf1_10472_ebo_28_1_261219.ScanId;v=1;d1=24467.24467.4	controllerType=0 controllerNumber=1 scan=24467	50.3078
30699:3	1	S.MPLPPHPGHPGYIN[+0.984]F[+31.990]SY[+31.990]EVLTPLK.W		F[+32], N[+1], Y[+32]	923.789	3	2769.35	2769.36	0	-2.8	17	NRagged	32.08	32.08	8.43	0.81	1278	>sp|P02817|AMELX_BOVIN Amelogenin, X isoform OS=Bos taurus OX=9913 GN=AMELX PE=1 SV=2	1	hf1_10472_ebo_28_1_261219.ScanId;v=1;d1=22687.22687.3	controllerType=0 controllerNumber=1 scan=22687	47.2003
46650:4	1	S.MPLP[+15.995]PHPGHP[+31.990]GYINF[+31.990]SYEVLTPLK.W		F[+32], P[+16][+32]	696.85	4	2784.38	2784.37	0	2.3	17	NRagged	57.42	57.42	0	2.21	1278	>sp|P02817|AMELX_BOVIN Amelogenin, X isoform OS=Bos taurus OX=9913 GN=AMELX PE=1 SV=2	1	hf1_10472_ebo_28_1_261219.ScanId;v=1;d1=33562.33562.4	controllerType=0 controllerNumber=1 scan=33562	66.8925
47297:4	1	S.MPLPPH[+15.995]PGHPGY[+31.990]INF[+31.990]SYEVLTPLK.W		F[+32], H[+16], Y[+32]	696.849	4	2784.37	2784.37	0	1.3	17	NRagged	72.71	72.71	0	2.21	1278	>sp|P02817|AMELX_BOVIN Amelogenin, X isoform OS=Bos taurus OX=9913 GN=AMELX PE=1 SV=2	1	hf1_10472_ebo_28_1_261219.ScanId;v=1;d1=34157.34157.4	controllerType=0 controllerNumber=1 scan=34157	68.6026
46883:4	1	S.MPLP[+15.995]PHPGHP[+31.990]GYINF[+31.990]SYEVLTPLK.W		F[+32], P[+16][+32]	696.85	4	2784.38	2784.37	0	3	17	NRagged	74.16	74.16	0	2.58	1278	>sp|P02817|AMELX_BOVIN Amelogenin, X isoform OS=Bos taurus OX=9913 GN=AMELX PE=1 SV=2	1	hf1_10472_ebo_28_1_261219.ScanId;v=1;d1=33798.33798.4	controllerType=0 controllerNumber=1 scan=33798	67.577
28587:4	1	S.MPLPP[+15.995]HPGHPGY[+31.990]INF[+31.990]SYEVLTPLK.W		F[+32], P[+16], Y[+32]	696.85	4	2784.38	2784.37	0	3.5	17	NRagged	76.97	76.97	0	1.05	1278	>sp|P02817|AMELX_BOVIN Amelogenin, X isoform OS=Bos taurus OX=9913 GN=AMELX PE=1 SV=2	1	hf1_10472_ebo_28_1_261219.ScanId;v=1;d1=21248.21248.4	controllerType=0 controllerNumber=1 scan=21248	44.704
47392:4	1	S.MPLP[+15.995]PHPGHPGY[+31.990]INF[+31.990]SYEVLTPLK.W		F[+32], P[+16], Y[+32]	696.849	4	2784.37	2784.37	0	1	17	NRagged	78.6	78.6	0	2.29	1278	>sp|P02817|AMELX_BOVIN Amelogenin, X isoform OS=Bos taurus OX=9913 GN=AMELX PE=1 SV=2	1	hf1_10472_ebo_28_1_261219.ScanId;v=1;d1=34237.34237.4	controllerType=0 controllerNumber=1 scan=34237	68.8264
30711:4	1	S.MPLPPHPGHPGY[+31.990]IN[+0.984]F[+31.990]SYEVLTPLK.W		F[+32], N[+1], Y[+32]	693.097	4	2769.37	2769.36	0	3	17	NRagged	80.36	80.36	0	1.05	1278	>sp|P02817|AMELX_BOVIN Amelogenin, X isoform OS=Bos taurus OX=9913 GN=AMELX PE=1 SV=2	1	hf1_10472_ebo_28_1_261219.ScanId;v=1;d1=22697.22697.4	controllerType=0 controllerNumber=1 scan=22697	47.2168
47749:4	1	S.MPLP[+31.990]P[+31.990]HPGHPGYINF[+15.995]SYEVLTPLK.W		F[+16], P[+32]*2	696.848	4	2784.37	2784.37	0	0.8	17	NRagged	94.52	94.52	0	2.47	1278	>sp|P02817|AMELX_BOVIN Amelogenin, X isoform OS=Bos taurus OX=9913 GN=AMELX PE=1 SV=2	1	hf1_10472_ebo_28_1_261219.ScanId;v=1;d1=34533.34533.4	controllerType=0 controllerNumber=1 scan=34533	69.5202
49185:5	1	S.M[+15.995]PLPPHPGHPGYINF[+31.990]SY[+31.990]EVLTPLK.W		F[+32], M[+16], Y[+32]	557.685	5	2784.39	2784.37	0	8.9	17	NRagged	95.98	95.98	6.19	2.21	1278	>sp|P02817|AMELX_BOVIN Amelogenin, X isoform OS=Bos taurus OX=9913 GN=AMELX PE=1 SV=2	1	hf1_10472_ebo_28_1_261219.ScanId;v=1;d1=35915.35915.5	controllerType=0 controllerNumber=1 scan=35915	73.5845
47154:4	1	S.MPLP[+31.990]PHP[+31.990]GHPGYINF[+15.995]SYEVLTPLK.W		F[+16], P[+32]*2	696.848	4	2784.37	2784.37	0	0.1	17	NRagged	104.47	104.47	0	2.45	1278	>sp|P02817|AMELX_BOVIN Amelogenin, X isoform OS=Bos taurus OX=9913 GN=AMELX PE=1 SV=2	1	hf1_10472_ebo_28_1_261219.ScanId;v=1;d1=34032.34032.4	controllerType=0 controllerNumber=1 scan=34032	68.2563
49373:4	1	S.MPLPPHPGH[+15.995]P[+31.990]GYINF[+31.990]SYEVLTPLK.W		F[+32], H[+16], P[+32]	696.851	4	2784.38	2784.37	0	4.6	17	NRagged	105	105	0	3.34	1278	>sp|P02817|AMELX_BOVIN Amelogenin, X isoform OS=Bos taurus OX=9913 GN=AMELX PE=1 SV=2	1	hf1_10472_ebo_28_1_261219.ScanId;v=1;d1=36095.36095.4	controllerType=0 controllerNumber=1 scan=36095	74.1691
49107:4	1	S.MPLP[+31.990]PHP[+31.990]GHPGYINF[+15.995]SYEVLTPLK.W		F[+16], P[+32]*2	696.851	4	2784.38	2784.37	0	4.6	17	NRagged	111.5	111.5	0	2.82	1278	>sp|P02817|AMELX_BOVIN Amelogenin, X isoform OS=Bos taurus OX=9913 GN=AMELX PE=1 SV=2	1	hf1_10472_ebo_28_1_261219.ScanId;v=1;d1=35860.35860.4	controllerType=0 controllerNumber=1 scan=35860	73.4877
00601:4	1	S.MPLP[+31.990]PHP[+31.990]GHPGYINF[+15.995]SYEVLTPLK.W		F[+16], P[+32]*2	696.849	4	2784.37	2784.37	0	0.9	17	NRagged	134.72	134.72	0	2.49	1278	>sp|P02817|AMELX_BOVIN Amelogenin, X isoform OS=Bos taurus OX=9913 GN=AMELX PE=1 SV=2	1	hf1_10472_ebo_28_1_261219.ScanId;v=1;d1=2010.2010.4	controllerType=0 controllerNumber=1 scan=2010	10.4739
28348:4	1	S.MPLPPHPGHPGY[+15.995]INF[+31.990]SY[+31.990]EVLTPLK.W		F[+32], Y[+16][+32]	696.851	4	2784.38	2784.37	0	4	17	NRagged	154.02	154.02	1.85	2.95	1278	>sp|P02817|AMELX_BOVIN Amelogenin, X isoform OS=Bos taurus OX=9913 GN=AMELX PE=1 SV=2	1	hf1_10472_ebo_28_1_261219.ScanId;v=1;d1=21085.21085.4	controllerType=0 controllerNumber=1 scan=21085	44.4234
46535:4	1	S.MPLPPHPGHP[+31.990]GY[+15.995]INF[+31.990]SYEVLTPLK.W		F[+32], P[+32], Y[+16]	696.849	4	2784.38	2784.37	0	1.7	17	NRagged	156.46	156.46	0	2.92	1278	>sp|P02817|AMELX_BOVIN Amelogenin, X isoform OS=Bos taurus OX=9913 GN=AMELX PE=1 SV=2	1	hf1_10472_ebo_28_1_261219.ScanId;v=1;d1=33447.33447.4	controllerType=0 controllerNumber=1 scan=33447	66.5539
47025:4	1	S.MPLPP[+31.990]H[+15.995]PGHPGYINF[+31.990]SYEVLTPLK.W		F[+32], H[+16], P[+32]	696.849	4	2784.37	2784.37	0	1.6	17	NRagged	185.22	185.22	3.5	3.54	1278	>sp|P02817|AMELX_BOVIN Amelogenin, X isoform OS=Bos taurus OX=9913 GN=AMELX PE=1 SV=2	1	hf1_10472_ebo_28_1_261219.ScanId;v=1;d1=33920.33920.4	controllerType=0 controllerNumber=1 scan=33920	67.9193
00486:3	1	S.M[+15.995]PLPPHPGHPGYIN[+0.984]FS[+79.966]YEVLTPLK.W		M[+16], N[+1], S[+80]	934.461	3	2801.37	2801.34	0	9.6	17	NRagged	232.33	232.33	6.67	4.28	1278	>sp|P02817|AMELX_BOVIN Amelogenin, X isoform OS=Bos taurus OX=9913 GN=AMELX PE=1 SV=2	1	hf1_10472_ebo_28_1_261219.ScanId;v=1;d1=1906.1906.3	controllerType=0 controllerNumber=1 scan=1906	10.1808
29511:4	1	S.MP[+31.990]LPPHPGHPGYIN[+0.984]FS[+79.966]YEVLTPLK.W		N[+1], P[+32], S[+80]	705.094	4	2817.36	2817.34	0	6.9	17	NRagged	254.94	254.94	9.93	5.97	1278	>sp|P02817|AMELX_BOVIN Amelogenin, X isoform OS=Bos taurus OX=9913 GN=AMELX PE=1 SV=2	1	hf1_10472_ebo_28_1_261219.ScanId;v=1;d1=21878.21878.4	controllerType=0 controllerNumber=1 scan=21878	45.798
29177:4	1	S.MP[+31.990]LPPHPGHPGYIN[+0.984]FS[+79.966]YEVLTPLK.W		N[+1], P[+32], S[+80]	705.095	4	2817.36	2817.34	0	7.2	17	NRagged	289.32	289.32	1.8	6.05	1278	>sp|P02817|AMELX_BOVIN Amelogenin, X isoform OS=Bos taurus OX=9913 GN=AMELX PE=1 SV=2	1	hf1_10472_ebo_28_1_261219.ScanId;v=1;d1=21649.21649.4	controllerType=0 controllerNumber=1 scan=21649	45.4001
29381:3	1	S.M[+31.990]PLPPHPGHPGYIN[+0.984]FS[+79.966]YEVLTPLK.W		M[+32], N[+1], S[+80]	939.79	3	2817.35	2817.34	0	6.8	17	NRagged	329.08	316.91	0	5.71	1278	>sp|P02817|AMELX_BOVIN Amelogenin, X isoform OS=Bos taurus OX=9913 GN=AMELX PE=1 SV=2	1	hf1_10472_ebo_28_1_261219.ScanId;v=1;d1=21791.21791.3	controllerType=0 controllerNumber=1 scan=21791	45.6466
00457:4	1	S.MP[+15.995]LPPHPGHPGYIN[+0.984]FS[+79.966]YEVLTPLK.W		N[+1], P[+16], S[+80]	701.097	4	2801.37	2801.34	0	9.2	17	NRagged	371.68	371.68	5.8	6.76	1278	>sp|P02817|AMELX_BOVIN Amelogenin, X isoform OS=Bos taurus OX=9913 GN=AMELX PE=1 SV=2	1	hf1_10472_ebo_28_1_261219.ScanId;v=1;d1=1882.1882.4	controllerType=0 controllerNumber=1 scan=1882	10.1366
49181:4	1	S.MP[+15.995]LPPHPGH[+15.995]PGYINFS[+79.966]YEVLTPLK.W		H[+16], P[+16], S[+80]	704.85	4	2816.38	2816.35	0	9	17	NRagged	423.84	423.84	3.8	7.03	1278	>sp|P02817|AMELX_BOVIN Amelogenin, X isoform OS=Bos taurus OX=9913 GN=AMELX PE=1 SV=2	1	hf1_10472_ebo_28_1_261219.ScanId;v=1;d1=35912.35912.4	controllerType=0 controllerNumber=1 scan=35912	73.5769
29510:4	1	S.M[+15.995]PLPP[+15.995]HPGHPGYINFS[+79.966]YEVLTPLK.W		M[+16], P[+16], S[+80]	704.843	4	2816.35	2816.35	0	0	17	NRagged	431.17	431.17	2.2	6.51	1278	>sp|P02817|AMELX_BOVIN Amelogenin, X isoform OS=Bos taurus OX=9913 GN=AMELX PE=1 SV=2	1	hf1_10472_ebo_28_1_261219.ScanId;v=1;d1=21878.21878.4	controllerType=0 controllerNumber=1 scan=21878	45.798
29176:4	1	S.MP[+15.995]LPPHPGHPGY[+15.995]INFS[+79.966]YEVLTPLK.W		P[+16], S[+80], Y[+16]	704.845	4	2816.36	2816.35	0	2.7	17	NRagged	522.3	522.3	3.8	7.39	1278	>sp|P02817|AMELX_BOVIN Amelogenin, X isoform OS=Bos taurus OX=9913 GN=AMELX PE=1 SV=2	1	hf1_10472_ebo_28_1_261219.ScanId;v=1;d1=21649.21649.4	controllerType=0 controllerNumber=1 scan=21649	45.4001
28537:3	1	S.M[+15.995]PLPPHPGHPGYIN[+0.984]FS[+79.966]YEVLTPLK.W		M[+16], N[+1], S[+80]	934.458	3	2801.36	2801.34	0	7	17	NRagged	580.4	580.4	19.71	9.27	1278	>sp|P02817|AMELX_BOVIN Amelogenin, X isoform OS=Bos taurus OX=9913 GN=AMELX PE=1 SV=2	1	hf1_10472_ebo_28_1_261219.ScanId;v=1;d1=21216.21216.4	controllerType=0 controllerNumber=1 scan=21216	44.6494
28886:4	1	S.MP[+15.995]LPPHPGH[+15.995]PGYINFS[+79.966]YEVLTPLK.W		H[+16], P[+16], S[+80]	704.845	4	2816.36	2816.35	0	2.6	17	NRagged	593.28	593.28	2.6	8.81	1278	>sp|P02817|AMELX_BOVIN Amelogenin, X isoform OS=Bos taurus OX=9913 GN=AMELX PE=1 SV=2	1	hf1_10472_ebo_28_1_261219.ScanId;v=1;d1=21450.21450.4	controllerType=0 controllerNumber=1 scan=21450	45.0527
29869:4	1	S.MP[+15.995]LPPHPGHPGYIN[+0.984]FS[+79.966]YEVLTPLK.W		N[+1], P[+16], S[+80]	701.097	4	2801.37	2801.34	0	8.8	17	NRagged	677.74	676.83	4	10.61	1278	>sp|P02817|AMELX_BOVIN Amelogenin, X isoform OS=Bos taurus OX=9913 GN=AMELX PE=1 SV=2	1	hf1_10472_ebo_28_1_261219.ScanId;v=1;d1=22114.22114.4	controllerType=0 controllerNumber=1 scan=22114	46.208
30172:4	1	S.MP[+15.995]LPPHPGHPGYIN[+0.984]FS[+79.966]YEVLTPLK.W		N[+1], P[+16], S[+80]	701.096	4	2801.36	2801.34	0	8.2	17	NRagged	680.12	638.67	5.8	11.31	1278	>sp|P02817|AMELX_BOVIN Amelogenin, X isoform OS=Bos taurus OX=9913 GN=AMELX PE=1 SV=2	1	hf1_10472_ebo_28_1_261219.ScanId;v=1;d1=22316.22316.4	controllerType=0 controllerNumber=1 scan=22316	46.56
28590:4	1	S.MP[+15.995]LPPHPGHP[+15.995]GYINFS[+79.966]YEVLTPLK.W		P[+16]*2, S[+80]	704.848	4	2816.37	2816.35	0	6.3	17	NRagged	721.49	721.49	3.8	12.06	1278	>sp|P02817|AMELX_BOVIN Amelogenin, X isoform OS=Bos taurus OX=9913 GN=AMELX PE=1 SV=2	1	hf1_10472_ebo_28_1_261219.ScanId;v=1;d1=21252.21252.4	controllerType=0 controllerNumber=1 scan=21252	44.7128
29380:3	1	S.M[+15.995]PLPPHP[+15.995]GHPGYINFS[+79.966]YEVLTPLK.W		M[+16], P[+16], S[+80]	939.458	3	2816.36	2816.35	0	3.1	17	NRagged	738.84	738.84	10.85	11.76	1278	>sp|P02817|AMELX_BOVIN Amelogenin, X isoform OS=Bos taurus OX=9913 GN=AMELX PE=1 SV=2	1	hf1_10472_ebo_28_1_261219.ScanId;v=1;d1=21791.21791.3	controllerType=0 controllerNumber=1 scan=21791	45.6466
31088:3	1	S.MP[+15.995]LPPHPGHPGYIN[+0.984]FS[+79.966]YEVLTPLK.W		N[+1], P[+16], S[+80]	934.46	3	2801.37	2801.34	0	9.2	17	NRagged	798.2	789.98	4.69	12.56	1278	>sp|P02817|AMELX_BOVIN Amelogenin, X isoform OS=Bos taurus OX=9913 GN=AMELX PE=1 SV=2	1	hf1_10472_ebo_28_1_261219.ScanId;v=1;d1=22954.22954.3	controllerType=0 controllerNumber=1 scan=22954	47.6661
29078:3	1	S.M[+15.995]PLPPHP[+15.995]GHPGYINFS[+79.966]YEVLTPLK.W		M[+16], P[+16], S[+80]	939.459	3	2816.36	2816.35	0	3.4	17	NRagged	810.9	810.9	8.3	13.76	1278	>sp|P02817|AMELX_BOVIN Amelogenin, X isoform OS=Bos taurus OX=9913 GN=AMELX PE=1 SV=2	1	hf1_10472_ebo_28_1_261219.ScanId;v=1;d1=21579.21579.3	controllerType=0 controllerNumber=1 scan=21579	45.2796
29988:3	1	S.M[+15.995]P[+15.995]LPPHPGHPGYINFS[+79.966]YEVLTPLK.W		M[+16], P[+16], S[+80]	939.461	3	2816.37	2816.35	0	5.6	17	NRagged	874.45	874.45	4.77	15.01	1278	>sp|P02817|AMELX_BOVIN Amelogenin, X isoform OS=Bos taurus OX=9913 GN=AMELX PE=1 SV=2	1	hf1_10472_ebo_28_1_261219.ScanId;v=1;d1=22195.22195.3	controllerType=0 controllerNumber=1 scan=22195	46.3504
28769:3	1	S.M[+15.995]PLPPHPGHPGY[+15.995]INFS[+79.966]YEVLTPLK.W		M[+16], S[+80], Y[+16]	939.462	3	2816.37	2816.35	0	6.5	17	NRagged	927.42	927.42	9.12	16.27	1278	>sp|P02817|AMELX_BOVIN Amelogenin, X isoform OS=Bos taurus OX=9913 GN=AMELX PE=1 SV=2	1	hf1_10472_ebo_28_1_261219.ScanId;v=1;d1=21374.21374.3	controllerType=0 controllerNumber=1 scan=21374	44.9227
28470:3	1	S.M[+15.995]PLPPHPGHP[+15.995]GYINFS[+79.966]YEVLTPLK.W		M[+16], P[+16], S[+80]	939.461	3	2816.37	2816.35	0	6	17	NRagged	988.3	988.3	7.54	17.01	1278	>sp|P02817|AMELX_BOVIN Amelogenin, X isoform OS=Bos taurus OX=9913 GN=AMELX PE=1 SV=2	1	hf1_10472_ebo_28_1_261219.ScanId;v=1;d1=21168.21168.3	controllerType=0 controllerNumber=1 scan=21168	44.5678
28755:3	1	S.M[+15.995]PLPPHPGHPGYIN[+0.984]FS[+79.966]YEVLTPLK.W		M[+16], N[+1], S[+80]	934.46	3	2801.36	2801.34	0	8.4	17	NRagged	1035.17	1029.48	51.15	17.56	1278	>sp|P02817|AMELX_BOVIN Amelogenin, X isoform OS=Bos taurus OX=9913 GN=AMELX PE=1 SV=2	1	hf1_10472_ebo_28_1_261219.ScanId;v=1;d1=21363.21363.3	controllerType=0 controllerNumber=1 scan=21363	44.904
30235:3	1	S.M[+15.995]PLPPHPGHPGYIN[+0.984]FS[+79.966]YEVLTPLK.W		M[+16], N[+1], S[+80]	934.46	3	2801.37	2801.34	0	9.2	17	NRagged	1044.06	1038.58	37.48	17.56	1278	>sp|P02817|AMELX_BOVIN Amelogenin, X isoform OS=Bos taurus OX=9913 GN=AMELX PE=1 SV=2	1	hf1_10472_ebo_28_1_261219.ScanId;v=1;d1=22362.22362.3	controllerType=0 controllerNumber=1 scan=22362	46.6387
29941:3	1	S.M[+15.995]PLPPHPGHPGYIN[+0.984]FS[+79.966]YEVLTPLK.W		M[+16], N[+1], S[+80]	934.46	3	2801.36	2801.34	0	8.2	17	NRagged	1059.82	1054.55	62.52	19.27	1278	>sp|P02817|AMELX_BOVIN Amelogenin, X isoform OS=Bos taurus OX=9913 GN=AMELX PE=1 SV=2	1	hf1_10472_ebo_28_1_261219.ScanId;v=1;d1=22162.22162.3	controllerType=0 controllerNumber=1 scan=22162	46.2928
00633:3	1	S.MP[+15.995]LPPHPGHP[+31.990]GYINF[+31.990]SY[+15.995]EVLTPLK.W		F[+32], P[+16][+32], Y[+16]	934.125	3	2800.36	2800.37	0	-2.2	17	NRagged	13.04	13.04	0	2.37	1278	>sp|P02817|AMELX_BOVIN Amelogenin, X isoform OS=Bos taurus OX=9913 GN=AMELX PE=1 SV=2	1	hf1_10472_ebo_28_1_261219.ScanId;v=1;d1=2032.2032.3	controllerType=0 controllerNumber=1 scan=2032	10.522
00179:3	1	S.MP[+15.995]LPPHPGHP[+31.990]GY[+31.990]INFSY[+15.995]EVLTPLK.W		P[+16][+32], Y[+16][+32]	934.125	3	2800.36	2800.37	0	-1.4	17	NRagged	22.96	22.96	0	2.2	1278	>sp|P02817|AMELX_BOVIN Amelogenin, X isoform OS=Bos taurus OX=9913 GN=AMELX PE=1 SV=2	1	hf1_10472_ebo_28_1_261219.ScanId;v=1;d1=640.640.3	controllerType=0 controllerNumber=1 scan=640	3.3538
37054:3	1	S.MP[+15.995]LPPHPGHPGY[+15.995]INF[+31.990]SY[+31.990]EVLTPLK.W		F[+32], P[+16], Y[+16][+32]	934.128	3	2800.37	2800.37	0	2	17	NRagged	37.28	37.28	5.8	0.91	1278	>sp|P02817|AMELX_BOVIN Amelogenin, X isoform OS=Bos taurus OX=9913 GN=AMELX PE=1 SV=2	1	hf1_10472_ebo_28_1_261219.ScanId;v=1;d1=27014.27014.3	controllerType=0 controllerNumber=1 scan=27014	54.8026
26994:3	1	S.MP[+15.995]LPPHPGHP[+31.990]GY[+31.990]INFSY[+15.995]EVLTPLK.W		P[+16][+32], Y[+16][+32]	934.136	3	2800.39	2800.37	0	9.8	17	NRagged	49.85	49.85	0	1	1278	>sp|P02817|AMELX_BOVIN Amelogenin, X isoform OS=Bos taurus OX=9913 GN=AMELX PE=1 SV=2	1	hf1_10472_ebo_28_1_261219.ScanId;v=1;d1=20176.20176.4	controllerType=0 controllerNumber=1 scan=20176	42.8553
37899:4	1	S.MPLP[+15.995]PHP[+31.990]GHPGYIN[+0.984]F[+31.990]SYEVLTPLK.W		F[+32], N[+1], P[+16][+32]	697.101	4	2785.38	2785.35	0	9.4	17	NRagged	72.79	72.79	0	2.17	1278	>sp|P02817|AMELX_BOVIN Amelogenin, X isoform OS=Bos taurus OX=9913 GN=AMELX PE=1 SV=2	1	hf1_10472_ebo_28_1_261219.ScanId;v=1;d1=27575.27575.4	controllerType=0 controllerNumber=1 scan=27575	55.7937
36532:4	1	S.MP[+15.995]LPPHP[+31.990]GHPGY[+15.995]INFSY[+31.990]EVLTPLK.W		P[+16][+32], Y[+16][+32]	700.85	4	2800.38	2800.37	0	5.1	17	NRagged	87.47	87.47	0	2.33	1278	>sp|P02817|AMELX_BOVIN Amelogenin, X isoform OS=Bos taurus OX=9913 GN=AMELX PE=1 SV=2	1	hf1_10472_ebo_28_1_261219.ScanId;v=1;d1=26665.26665.4	controllerType=0 controllerNumber=1 scan=26665	54.1871
37506:4	1	S.MP[+15.995]LPPHPGHP[+31.990]GYINF[+31.990]SY[+15.995]EVLTPLK.W		F[+32], P[+16][+32], Y[+16]	700.848	4	2800.37	2800.37	0	1.9	17	NRagged	92.74	92.74	0	2.17	1278	>sp|P02817|AMELX_BOVIN Amelogenin, X isoform OS=Bos taurus OX=9913 GN=AMELX PE=1 SV=2	1	hf1_10472_ebo_28_1_261219.ScanId;v=1;d1=27309.27309.2	controllerType=0 controllerNumber=1 scan=27309	55.3228
00885:4	1	S.MP[+15.995]LP[+15.995]PHPGHPGY[+31.990]INF[+31.990]SYEVLTPLK.W		F[+32], P[+16]*2, Y[+32]	700.848	4	2800.37	2800.37	0	2.1	17	NRagged	92.95	92.95	0	2.47	1278	>sp|P02817|AMELX_BOVIN Amelogenin, X isoform OS=Bos taurus OX=9913 GN=AMELX PE=1 SV=2	1	hf1_10472_ebo_28_1_261219.ScanId;v=1;d1=2274.2274.4	controllerType=0 controllerNumber=1 scan=2274	11.2877
49403:4	1	S.MP[+15.995]LP[+15.995]PHPGHP[+31.990]GYINF[+31.990]SYEVLTPLK.W		F[+32], P[+16]*2[+32]	700.85	4	2800.38	2800.37	0	4	17	NRagged	111.89	111.89	0	3.11	1278	>sp|P02817|AMELX_BOVIN Amelogenin, X isoform OS=Bos taurus OX=9913 GN=AMELX PE=1 SV=2	1	hf1_10472_ebo_28_1_261219.ScanId;v=1;d1=36118.36118.4	controllerType=0 controllerNumber=1 scan=36118	74.2337
01008:4	1	S.MP[+15.995]LP[+15.995]PHPGHPGY[+31.990]INF[+31.990]SYEVLTPLK.W		F[+32], P[+16]*2, Y[+32]	700.848	4	2800.37	2800.37	0	2	17	NRagged	116.93	116.93	0	2.31	1278	>sp|P02817|AMELX_BOVIN Amelogenin, X isoform OS=Bos taurus OX=9913 GN=AMELX PE=1 SV=2	1	hf1_10472_ebo_28_1_261219.ScanId;v=1;d1=2385.2385.4	controllerType=0 controllerNumber=1 scan=2385	11.6321
28031:4	1	S.MP[+15.995]LPPHP[+31.990]GH[+15.995]PGYINF[+31.990]SYEVLTPLK.W		F[+32], H[+16], P[+16][+32]	700.849	4	2800.38	2800.37	0	3.5	17	NRagged	117.14	117.14	5.8	2.26	1278	>sp|P02817|AMELX_BOVIN Amelogenin, X isoform OS=Bos taurus OX=9913 GN=AMELX PE=1 SV=2	1	hf1_10472_ebo_28_1_261219.ScanId;v=1;d1=20871.20871.2	controllerType=0 controllerNumber=1 scan=20871	44.0566
34863:4	1	S.MPLPPHPGHPGY[+15.995]IN[+0.984]F[+31.990]SY[+31.990]EVLTPLK.W		F[+32], N[+1], Y[+16][+32]	697.1	4	2785.38	2785.35	0	8	17	NRagged	218.15	218.15	4.88	4.25	1278	>sp|P02817|AMELX_BOVIN Amelogenin, X isoform OS=Bos taurus OX=9913 GN=AMELX PE=1 SV=2	1	hf1_10472_ebo_28_1_261219.ScanId;v=1;d1=25512.25512.6	controllerType=0 controllerNumber=1 scan=25512	52.1337
36551:3	1	S.MPLPPHPGHP[+31.990]GY[+31.990]IN[+0.984]F[+15.995]SYEVLTPLK.W		F[+16], N[+1], P[+32], Y[+32]	929.132	3	2785.38	2785.35	0	9.6	17	NRagged	258.07	258.07	6.86	5.22	1278	>sp|P02817|AMELX_BOVIN Amelogenin, X isoform OS=Bos taurus OX=9913 GN=AMELX PE=1 SV=2	1	hf1_10472_ebo_28_1_261219.ScanId;v=1;d1=26678.26678.3	controllerType=0 controllerNumber=1 scan=26678	54.2096
37760:3	1	S.MPLPPHPGHP[+31.990]GY[+31.990]IN[+0.984]F[+15.995]SYEVLTPLK.W		F[+16], N[+1], P[+32], Y[+32]	929.131	3	2785.38	2785.35	0	9.2	17	NRagged	303.88	303.88	2.34	5.3	1278	>sp|P02817|AMELX_BOVIN Amelogenin, X isoform OS=Bos taurus OX=9913 GN=AMELX PE=1 SV=2	1	hf1_10472_ebo_28_1_261219.ScanId;v=1;d1=27480.27480.3	controllerType=0 controllerNumber=1 scan=27480	55.6255
32128:4	1	S.MPLPPHPGHP[+15.995]GY[+31.990]IN[+0.984]F[+31.990]SYEVLTPLK.W		F[+32], N[+1], P[+16], Y[+32]	697.099	4	2785.38	2785.35	0	7.5	17	NRagged	332.14	332.14	4.76	6.29	1278	>sp|P02817|AMELX_BOVIN Amelogenin, X isoform OS=Bos taurus OX=9913 GN=AMELX PE=1 SV=2	1	hf1_10472_ebo_28_1_261219.ScanId;v=1;d1=23678.23678.4	controllerType=0 controllerNumber=1 scan=23678	48.9286
49128:3	1	S.MPLPPHPGHP[+31.990]GY[+31.990]IN[+0.984]F[+15.995]SYEVLTPLK.W		F[+16], N[+1], P[+32], Y[+32]	929.13	3	2785.38	2785.35	0	8.1	17	NRagged	474.28	474.28	0	7.61	1278	>sp|P02817|AMELX_BOVIN Amelogenin, X isoform OS=Bos taurus OX=9913 GN=AMELX PE=1 SV=2	1	hf1_10472_ebo_28_1_261219.ScanId;v=1;d1=35873.35873.3	controllerType=0 controllerNumber=1 scan=35873	73.5101
34316:4	1	S.MPLPPHPGHPGYINFSYEVLTPLKW.Y			723.379	4	2890.49	2890.47	0	6.2	17	Non	269.91	269.91	269.91	5.96	1278	>sp|P02817|AMELX_BOVIN Amelogenin, X isoform OS=Bos taurus OX=9913 GN=AMELX PE=1 SV=2	1	hf1_10472_ebo_28_1_261219.ScanId;v=1;d1=25146.25146.4	controllerType=0 controllerNumber=1 scan=25146	51.494
38046:3	1	S.MPLPPHPGHPGYINFS[+79.966]YEVLTPLKW.Y		S[+80]	990.824	3	2970.46	2970.44	0	5.3	17	Non	110.75	35.55	35.55	1.12	1278	>sp|P02817|AMELX_BOVIN Amelogenin, X isoform OS=Bos taurus OX=9913 GN=AMELX PE=1 SV=2	1	hf1_10472_ebo_28_1_261219.ScanId;v=1;d1=27668.27668.3	controllerType=0 controllerNumber=1 scan=27668	55.9571
37182:4	1	S.MPLPPHPGHPGYINFS[+79.966]YEVLTPLKW.Y		S[+80]	743.366	4	2970.44	2970.44	0	0.8	17	Non	262.85	262.85	48.71	4.84	1278	>sp|P02817|AMELX_BOVIN Amelogenin, X isoform OS=Bos taurus OX=9913 GN=AMELX PE=1 SV=2	1	hf1_10472_ebo_28_1_261219.ScanId;v=1;d1=27092.27092.4	controllerType=0 controllerNumber=1 scan=27092	54.94
36010:4	1	S.MPLPPHPGHPGYINFS[+79.966]YEVLTPLKW.Y		S[+80]	743.37	4	2970.46	2970.44	0	6.3	17	Non	279.53	279.53	66.7	5.72	1278	>sp|P02817|AMELX_BOVIN Amelogenin, X isoform OS=Bos taurus OX=9913 GN=AMELX PE=1 SV=2	1	hf1_10472_ebo_28_1_261219.ScanId;v=1;d1=26307.26307.4	controllerType=0 controllerNumber=1 scan=26307	53.5457
33238:4	1	S.MP[+15.995]LPPHPGHPGYINFSYEVLTPLKW.Y		P[+16]	727.379	4	2906.49	2906.47	0	8	17	Non	289.07	289.07	5.8	6.3	1278	>sp|P02817|AMELX_BOVIN Amelogenin, X isoform OS=Bos taurus OX=9913 GN=AMELX PE=1 SV=2	1	hf1_10472_ebo_28_1_261219.ScanId;v=1;d1=24420.24420.4	controllerType=0 controllerNumber=1 scan=24420	50.2265
36880:4	1	S.MPLPPHPGHPGYINFS[+79.966]YEVLTPLKW.Y		S[+80]	743.37	4	2970.46	2970.44	0	5.6	17	Non	322.05	322.05	79.56	6.28	1278	>sp|P02817|AMELX_BOVIN Amelogenin, X isoform OS=Bos taurus OX=9913 GN=AMELX PE=1 SV=2	1	hf1_10472_ebo_28_1_261219.ScanId;v=1;d1=26895.26895.4	controllerType=0 controllerNumber=1 scan=26895	54.5922
37489:3	1	S.MPLPPHPGHPGYINFS[+79.966]YEVLTPLKW.Y		S[+80]	990.82	3	2970.44	2970.44	0	1.2	17	Non	441.81	441.81	152.62	6.54	1278	>sp|P02817|AMELX_BOVIN Amelogenin, X isoform OS=Bos taurus OX=9913 GN=AMELX PE=1 SV=2	1	hf1_10472_ebo_28_1_261219.ScanId;v=1;d1=27299.27299.3	controllerType=0 controllerNumber=1 scan=27299	55.3049
36575:4	1	S.MPLPPHPGHPGYINFS[+79.966]YEVLTPLKW.Y		S[+80]	743.371	4	2970.46	2970.44	0	7.2	17	Non	478.22	478.22	208.15	8.35	1278	>sp|P02817|AMELX_BOVIN Amelogenin, X isoform OS=Bos taurus OX=9913 GN=AMELX PE=1 SV=2	1	hf1_10472_ebo_28_1_261219.ScanId;v=1;d1=26695.26695.4	controllerType=0 controllerNumber=1 scan=26695	54.241
36281:4	1	S.MPLPPHPGHPGYINFS[+79.966]YEVLTPLKW.Y		S[+80]	743.37	4	2970.46	2970.44	0	6	17	Non	487.26	487.26	228.58	7.55	1278	>sp|P02817|AMELX_BOVIN Amelogenin, X isoform OS=Bos taurus OX=9913 GN=AMELX PE=1 SV=2	1	hf1_10472_ebo_28_1_261219.ScanId;v=1;d1=26497.26497.4	controllerType=0 controllerNumber=1 scan=26497	53.8915
36865:3	1	S.MPLPPHPGHPGYINFS[+79.966]YEVLTPLKW.Y		S[+80]	990.823	3	2970.46	2970.44	0	5	17	Non	844.45	844.45	415.72	14.02	1278	>sp|P02817|AMELX_BOVIN Amelogenin, X isoform OS=Bos taurus OX=9913 GN=AMELX PE=1 SV=2	1	hf1_10472_ebo_28_1_261219.ScanId;v=1;d1=26884.26884.3	controllerType=0 controllerNumber=1 scan=26884	54.5728
36559:3	1	S.MPLPPHPGHPGYINFS[+79.966]YEVLTPLKW.Y		S[+80]	990.826	3	2970.46	2970.44	0	7.1	17	Non	976.03	976.03	478.53	17.28	1278	>sp|P02817|AMELX_BOVIN Amelogenin, X isoform OS=Bos taurus OX=9913 GN=AMELX PE=1 SV=2	1	hf1_10472_ebo_28_1_261219.ScanId;v=1;d1=26684.26684.3	controllerType=0 controllerNumber=1 scan=26684	54.2215
36266:3	1	S.MPLPPHPGHPGYINFS[+79.966]YEVLTPLKW.Y		S[+80]	990.825	3	2970.46	2970.44	0	6.2	17	Non	984.56	984.56	465.37	17.02	1278	>sp|P02817|AMELX_BOVIN Amelogenin, X isoform OS=Bos taurus OX=9913 GN=AMELX PE=1 SV=2	1	hf1_10472_ebo_28_1_261219.ScanId;v=1;d1=26486.26486.3	controllerType=0 controllerNumber=1 scan=26486	53.872
34681:4	1	S.MPLPPHPGHPGYINFS[+79.966]YEVLTP[+31.990]LKW.Y		P[+32], S[+80]	751.366	4	3002.44	3002.43	0	4.2	17	Non	39.99	39.99	4.61	1.05	1278	>sp|P02817|AMELX_BOVIN Amelogenin, X isoform OS=Bos taurus OX=9913 GN=AMELX PE=1 SV=2	1	hf1_10472_ebo_28_1_261219.ScanId;v=1;d1=25390.25390.4	controllerType=0 controllerNumber=1 scan=25390	51.9216
34372:4	1	S.MPLPPHPGHPGYINFS[+79.966]YEVLTPLKW[+31.990].Y		S[+80], W[+32]	751.368	4	3002.45	3002.43	0	6.9	17	Non	112.93	77.68	9.7	2.28	1278	>sp|P02817|AMELX_BOVIN Amelogenin, X isoform OS=Bos taurus OX=9913 GN=AMELX PE=1 SV=2	1	hf1_10472_ebo_28_1_261219.ScanId;v=1;d1=25186.25186.4	controllerType=0 controllerNumber=1 scan=25186	51.5653
35358:4	1	S.MP[+15.995]LPPHPGHPGYINFS[+79.966]YEVLTPLKW.Y		P[+16], S[+80]	747.37	4	2986.46	2986.44	0	6.7	17	Non	245.46	245.46	4	5.98	1278	>sp|P02817|AMELX_BOVIN Amelogenin, X isoform OS=Bos taurus OX=9913 GN=AMELX PE=1 SV=2	1	hf1_10472_ebo_28_1_261219.ScanId;v=1;d1=25856.25856.4	controllerType=0 controllerNumber=1 scan=25856	52.7441
37183:4	1	S.MPLPPHPGHPGYIN[+0.984]FS[+79.966]YEVLTPLKW.Y		N[+1], S[+80]	743.617	4	2971.45	2971.43	0	6.7	17	Non	276.7	276.7	90.67	5.98	1278	>sp|P02817|AMELX_BOVIN Amelogenin, X isoform OS=Bos taurus OX=9913 GN=AMELX PE=1 SV=2	1	hf1_10472_ebo_28_1_261219.ScanId;v=1;d1=27092.27092.4	controllerType=0 controllerNumber=1 scan=27092	54.94
35661:4	1	S.MP[+15.995]LPPHPGHPGYINFS[+79.966]YEVLTPLKW.Y		P[+16], S[+80]	747.368	4	2986.45	2986.44	0	4.9	17	Non	296.84	296.84	10.77	6.04	1278	>sp|P02817|AMELX_BOVIN Amelogenin, X isoform OS=Bos taurus OX=9913 GN=AMELX PE=1 SV=2	1	hf1_10472_ebo_28_1_261219.ScanId;v=1;d1=26064.26064.4	controllerType=0 controllerNumber=1 scan=26064	53.11
35394:3	1	S.M[+15.995]PLPPHPGHPGYINFS[+79.966]YEVLTPLKW.Y		M[+16], S[+80]	996.155	3	2986.45	2986.44	0	5.3	17	Non	332.24	332.24	7.37	6.23	1278	>sp|P02817|AMELX_BOVIN Amelogenin, X isoform OS=Bos taurus OX=9913 GN=AMELX PE=1 SV=2	1	hf1_10472_ebo_28_1_261219.ScanId;v=1;d1=25883.25883.3	controllerType=0 controllerNumber=1 scan=25883	52.7933
34699:3	1	S.MPLPPHPGHPGYINFS[+79.966]YEVLTP[+31.990]LKW.Y		P[+32], S[+80]	1001.49	3	3002.45	3002.43	0	4.8	17	Non	346.48	346.48	34.01	6.23	1278	>sp|P02817|AMELX_BOVIN Amelogenin, X isoform OS=Bos taurus OX=9913 GN=AMELX PE=1 SV=2	1	hf1_10472_ebo_28_1_261219.ScanId;v=1;d1=25401.25401.3	controllerType=0 controllerNumber=1 scan=25401	51.9408
34792:4	1	S.MP[+15.995]LPPHPGHPGYINFS[+79.966]YEVLTPLKW.Y		P[+16], S[+80]	747.368	4	2986.45	2986.44	0	4.7	17	Non	371.27	371.27	16.43	7.4	1278	>sp|P02817|AMELX_BOVIN Amelogenin, X isoform OS=Bos taurus OX=9913 GN=AMELX PE=1 SV=2	1	hf1_10472_ebo_28_1_261219.ScanId;v=1;d1=25461.25461.4	controllerType=0 controllerNumber=1 scan=25461	52.0414
34397:3	1	S.MPLPPHPGHPGYINFS[+79.966]YEVLTPLKW[+31.990].Y		S[+80], W[+32]	1001.49	3	3002.45	3002.43	0	6.9	17	Non	401.64	401.64	6.09	7.64	1278	>sp|P02817|AMELX_BOVIN Amelogenin, X isoform OS=Bos taurus OX=9913 GN=AMELX PE=1 SV=2	1	hf1_10472_ebo_28_1_261219.ScanId;v=1;d1=25202.25202.3	controllerType=0 controllerNumber=1 scan=25202	51.5922
35070:4	1	S.MP[+15.995]LPPHPGHPGYINFS[+79.966]YEVLTPLKW.Y		P[+16], S[+80]	747.369	4	2986.45	2986.44	0	5.7	17	Non	459.64	459.64	17.22	7.41	1278	>sp|P02817|AMELX_BOVIN Amelogenin, X isoform OS=Bos taurus OX=9913 GN=AMELX PE=1 SV=2	1	hf1_10472_ebo_28_1_261219.ScanId;v=1;d1=25661.25661.4	controllerType=0 controllerNumber=1 scan=25661	52.3962
35916:3	1	S.M[+15.995]PLPPHPGHPGYINFS[+79.966]YEVLTPLKW.Y		M[+16], S[+80]	996.153	3	2986.44	2986.44	0	2.6	17	Non	604.22	604.22	7.12	9.15	1278	>sp|P02817|AMELX_BOVIN Amelogenin, X isoform OS=Bos taurus OX=9913 GN=AMELX PE=1 SV=2	1	hf1_10472_ebo_28_1_261219.ScanId;v=1;d1=26245.26245.3	controllerType=0 controllerNumber=1 scan=26245	53.436
34784:3	1	S.M[+15.995]PLPPHPGHPGYINFS[+79.966]YEVLTPLKW.Y		M[+16], S[+80]	996.157	3	2986.46	2986.44	0	6.7	17	Non	677.89	677.89	17.89	11.28	1278	>sp|P02817|AMELX_BOVIN Amelogenin, X isoform OS=Bos taurus OX=9913 GN=AMELX PE=1 SV=2	1	hf1_10472_ebo_28_1_261219.ScanId;v=1;d1=25457.25457.3	controllerType=0 controllerNumber=1 scan=25457	52.0356
35351:3	1	S.M[+15.995]PLPPHPGHPGYINFS[+79.966]YEVLTPLKW.Y		M[+16], S[+80]	996.157	3	2986.46	2986.44	0	6.5	17	Non	858.04	858.04	22.07	15.28	1278	>sp|P02817|AMELX_BOVIN Amelogenin, X isoform OS=Bos taurus OX=9913 GN=AMELX PE=1 SV=2	1	hf1_10472_ebo_28_1_261219.ScanId;v=1;d1=25850.25850.3	controllerType=0 controllerNumber=1 scan=25850	52.7322
37164:3	1	S.MPLPPHPGHPGYIN[+0.984]FS[+79.966]YEVLTPLKW.Y		N[+1], S[+80]	991.154	3	2971.45	2971.43	0	7.5	17	Non	910.58	910.58	483.41	16.28	1278	>sp|P02817|AMELX_BOVIN Amelogenin, X isoform OS=Bos taurus OX=9913 GN=AMELX PE=1 SV=2	1	hf1_10472_ebo_28_1_261219.ScanId;v=1;d1=27080.27080.3	controllerType=0 controllerNumber=1 scan=27080	54.9191
35053:3	1	S.M[+15.995]PLPPHPGHPGYINFS[+79.966]YEVLTPLKW.Y		M[+16], S[+80]	996.155	3	2986.45	2986.44	0	5.3	17	Non	917.72	917.72	26.68	16.02	1278	>sp|P02817|AMELX_BOVIN Amelogenin, X isoform OS=Bos taurus OX=9913 GN=AMELX PE=1 SV=2	1	hf1_10472_ebo_28_1_261219.ScanId;v=1;d1=25648.25648.3	controllerType=0 controllerNumber=1 scan=25648	52.3749
35345:3	1	S.MPLPPHPGHPGYIN[+0.984]F[+31.990]S[+79.966]YEVLTPLKW.Y		F[+32], N[+1], S[+80]	1001.82	3	3003.44	3003.42	0	8.9	17	Non	30.5	26.86	1.78	1	1278	>sp|P02817|AMELX_BOVIN Amelogenin, X isoform OS=Bos taurus OX=9913 GN=AMELX PE=1 SV=2	1	hf1_10472_ebo_28_1_261219.ScanId;v=1;d1=25845.25845.3	controllerType=0 controllerNumber=1 scan=25845	52.722
32920:4	1	S.MP[+15.995]LPPHPGHPGYINFS[+79.966]YEVLTPLKW[+31.990].Y		P[+16], S[+80], W[+32]	755.366	4	3018.44	3018.43	0	5.4	17	Non	68.17	68.17	5.8	1.17	1278	>sp|P02817|AMELX_BOVIN Amelogenin, X isoform OS=Bos taurus OX=9913 GN=AMELX PE=1 SV=2	1	hf1_10472_ebo_28_1_261219.ScanId;v=1;d1=24207.24207.6	controllerType=0 controllerNumber=1 scan=24207	49.8536
38186:3	1	S.MPLPP[+15.995]HPGHPGYINF[+31.990]SY[+31.990]EVLTPLKW.Y		F[+32], P[+16], Y[+32]	990.82	3	2970.44	2970.45	0	-1.6	17	Non	73.05	73.05	0	0.85	1278	>sp|P02817|AMELX_BOVIN Amelogenin, X isoform OS=Bos taurus OX=9913 GN=AMELX PE=1 SV=2	1	hf1_10472_ebo_28_1_261219.ScanId;v=1;d1=27756.27756.4	controllerType=0 controllerNumber=1 scan=27756	56.1131
33990:4	1	S.MP[+15.995]LPPHPGHPGYINFS[+79.966]YEVLTPLKW[+31.990].Y		P[+16], S[+80], W[+32]	755.364	4	3018.44	3018.43	0	3.1	17	Non	137.86	127.83	5.8	2.4	1278	>sp|P02817|AMELX_BOVIN Amelogenin, X isoform OS=Bos taurus OX=9913 GN=AMELX PE=1 SV=2	1	hf1_10472_ebo_28_1_261219.ScanId;v=1;d1=24927.24927.6	controllerType=0 controllerNumber=1 scan=24927	51.1108
37545:4	1	S.MPLPPHPGHP[+31.990]GY[+15.995]INF[+31.990]SYEVLTPLKW.Y		F[+32], P[+32], Y[+16]	743.371	4	2970.46	2970.45	0	3.7	17	Non	186.2	186.2	0	3.94	1278	>sp|P02817|AMELX_BOVIN Amelogenin, X isoform OS=Bos taurus OX=9913 GN=AMELX PE=1 SV=2	1	hf1_10472_ebo_28_1_261219.ScanId;v=1;d1=27335.27335.4	controllerType=0 controllerNumber=1 scan=27335	55.3676
35662:4	1	S.MP[+15.995]LPPHPGHPGYIN[+0.984]FS[+79.966]YEVLTPLKW.Y		N[+1], P[+16], S[+80]	747.615	4	2987.44	2987.42	0	6.5	17	Non	268.56	257.93	15.56	5.98	1278	>sp|P02817|AMELX_BOVIN Amelogenin, X isoform OS=Bos taurus OX=9913 GN=AMELX PE=1 SV=2	1	hf1_10472_ebo_28_1_261219.ScanId;v=1;d1=26064.26064.4	controllerType=0 controllerNumber=1 scan=26064	53.11
33266:4	1	S.MP[+15.995]LPPHPGHPGYINFS[+79.966]YEVLTPLKW[+31.990].Y		P[+16], S[+80], W[+32]	755.366	4	3018.44	3018.43	0	5.8	17	Non	277.64	277.64	14.95	5.72	1278	>sp|P02817|AMELX_BOVIN Amelogenin, X isoform OS=Bos taurus OX=9913 GN=AMELX PE=1 SV=2	1	hf1_10472_ebo_28_1_261219.ScanId;v=1;d1=24441.24441.4	controllerType=0 controllerNumber=1 scan=24441	50.2639
33545:3	1	S.MP[+15.995]LPPHPGHPGYINFS[+79.966]YEVLTPLKW[+31.990].Y		P[+16], S[+80], W[+32]	1006.82	3	3018.44	3018.43	0	3.9	17	Non	280.76	280.76	5.8	5.66	1278	>sp|P02817|AMELX_BOVIN Amelogenin, X isoform OS=Bos taurus OX=9913 GN=AMELX PE=1 SV=2	1	hf1_10472_ebo_28_1_261219.ScanId;v=1;d1=24631.24631.3	controllerType=0 controllerNumber=1 scan=24631	50.5953
32974:4	1	S.MP[+15.995]LPPHPGHPGYINFS[+79.966]YEVLTPLKW[+31.990].Y		P[+16], S[+80], W[+32]	755.367	4	3018.45	3018.43	0	6.4	17	Non	298.42	298.42	5.8	6.3	1278	>sp|P02817|AMELX_BOVIN Amelogenin, X isoform OS=Bos taurus OX=9913 GN=AMELX PE=1 SV=2	1	hf1_10472_ebo_28_1_261219.ScanId;v=1;d1=24243.24243.4	controllerType=0 controllerNumber=1 scan=24243	49.9165
36019:3	1	S.MP[+15.995]LPPHPGHPGYIN[+0.984]FS[+79.966]YEVLTPLKW.Y		N[+1], P[+16], S[+80]	996.486	3	2987.44	2987.42	0	7.9	17	Non	338.98	295.83	5.8	6.32	1278	>sp|P02817|AMELX_BOVIN Amelogenin, X isoform OS=Bos taurus OX=9913 GN=AMELX PE=1 SV=2	1	hf1_10472_ebo_28_1_261219.ScanId;v=1;d1=26315.26315.3	controllerType=0 controllerNumber=1 scan=26315	53.5632
32941:3	1	S.MP[+15.995]LPPHPGHPGYINFS[+79.966]YEVLTPLKW[+31.990].Y		P[+16], S[+80], W[+32]	1006.82	3	3018.45	3018.43	0	7.4	17	Non	350.76	350.76	5.8	6.67	1278	>sp|P02817|AMELX_BOVIN Amelogenin, X isoform OS=Bos taurus OX=9913 GN=AMELX PE=1 SV=2	1	hf1_10472_ebo_28_1_261219.ScanId;v=1;d1=24221.24221.3	controllerType=0 controllerNumber=1 scan=24221	49.8775
35638:3	1	S.M[+15.995]PLPPHPGHPGYIN[+0.984]FS[+79.966]YEVLTPLKW.Y		M[+16], N[+1], S[+80]	996.484	3	2987.44	2987.42	0	6	17	Non	682.91	491.28	30.7	11.02	1278	>sp|P02817|AMELX_BOVIN Amelogenin, X isoform OS=Bos taurus OX=9913 GN=AMELX PE=1 SV=2	1	hf1_10472_ebo_28_1_261219.ScanId;v=1;d1=26048.26048.3	controllerType=0 controllerNumber=1 scan=26048	53.0802
33236:3	1	S.M[+15.995]PLPPHPGHPGYINFS[+79.966]YEVLTPLKW[+31.990].Y		M[+16], S[+80], W[+32]	1006.82	3	3018.44	3018.43	0	5.8	17	Non	870.72	870.72	20.75	15.02	1278	>sp|P02817|AMELX_BOVIN Amelogenin, X isoform OS=Bos taurus OX=9913 GN=AMELX PE=1 SV=2	1	hf1_10472_ebo_28_1_261219.ScanId;v=1;d1=24419.24419.3	controllerType=0 controllerNumber=1 scan=24419	50.225
33920:4	1	S.MP[+15.995]LPPHPGHPGYIN[+0.984]FS[+79.966]YEVLTPLKW[+31.990].Y		N[+1], P[+16], S[+80], W[+32]	755.614	4	3019.43	3019.41	0	7.3	17	Non	88.7	88.7	5.8	2.44	1278	>sp|P02817|AMELX_BOVIN Amelogenin, X isoform OS=Bos taurus OX=9913 GN=AMELX PE=1 SV=2	1	hf1_10472_ebo_28_1_261219.ScanId;v=1;d1=24882.24882.4	controllerType=0 controllerNumber=1 scan=24882	51.0335
49197:4	1	S.MP[+15.995]LPPHP[+31.990]GHP[+31.990]GY[+15.995]INFSYEVLTPLKW.Y		P[+16][+32]*2, Y[+16]	747.37	4	2986.46	2986.44	0	5.3	17	Non	101.04	101.04	7.01	2.82	1278	>sp|P02817|AMELX_BOVIN Amelogenin, X isoform OS=Bos taurus OX=9913 GN=AMELX PE=1 SV=2	1	hf1_10472_ebo_28_1_261219.ScanId;v=1;d1=35926.35926.4	controllerType=0 controllerNumber=1 scan=35926	73.6047
36256:3	1	S.MP[+15.995]LPPHPGHP[+31.990]GYINF[+31.990]SY[+15.995]EVLTPLKW.Y		F[+32], P[+16][+32], Y[+16]	996.161	3	2986.47	2986.44	0	7.6	17	Non	116.55	19.97	0	2.26	1278	>sp|P02817|AMELX_BOVIN Amelogenin, X isoform OS=Bos taurus OX=9913 GN=AMELX PE=1 SV=2	1	hf1_10472_ebo_28_1_261219.ScanId;v=1;d1=26479.26479.3	controllerType=0 controllerNumber=1 scan=26479	53.8587
35947:4	1	S.MP[+15.995]LPPHPGHPGY[+15.995]INF[+31.990]SY[+31.990]EVLTPLKW.Y		F[+32], P[+16], Y[+16][+32]	747.367	4	2986.45	2986.44	0	0.8	17	Non	196.58	196.58	2.47	3.33	1278	>sp|P02817|AMELX_BOVIN Amelogenin, X isoform OS=Bos taurus OX=9913 GN=AMELX PE=1 SV=2	1	hf1_10472_ebo_28_1_261219.ScanId;v=1;d1=26264.26264.4	controllerType=0 controllerNumber=1 scan=26264	53.4701
35988:3	1	S.MPLPPHPGHP[+31.990]GY[+15.995]IN[+0.984]F[+31.990]SYEVLTPLKW.Y		F[+32], N[+1], P[+32], Y[+16]	991.159	3	2971.46	2971.43	0	10	17	Non	203.32	203.32	0	3.53	1278	>sp|P02817|AMELX_BOVIN Amelogenin, X isoform OS=Bos taurus OX=9913 GN=AMELX PE=1 SV=2	1	hf1_10472_ebo_28_1_261219.ScanId;v=1;d1=26291.26291.3	controllerType=0 controllerNumber=1 scan=26291	53.516
37142:4	1	S.MPLPPHPGHPGYINFSYEVLTPLKWY.Q			764.138	4	3053.53	3053.54	0	-3	17	Non	118.41	118.41	118.41	2.16	1278	>sp|P02817|AMELX_BOVIN Amelogenin, X isoform OS=Bos taurus OX=9913 GN=AMELX PE=1 SV=2	1	hf1_10472_ebo_28_1_261219.ScanId;v=1;d1=27067.27067.4	controllerType=0 controllerNumber=1 scan=27067	54.8938
37426:4	1	S.MPLPPHPGHPGYINFSYEVLTPLKWY.Q			764.146	4	3053.56	3053.54	0	8	17	Non	146.2	146.2	146.2	3.41	1278	>sp|P02817|AMELX_BOVIN Amelogenin, X isoform OS=Bos taurus OX=9913 GN=AMELX PE=1 SV=2	1	hf1_10472_ebo_28_1_261219.ScanId;v=1;d1=27253.27253.4	controllerType=0 controllerNumber=1 scan=27253	55.2215
30984:3	1	S.MPLPPHPGHPGYINFSYEVLTPLKWY.Q			1018.51	3	3053.53	3053.54	0	-3.8	17	Non	163.03	163.03	163.03	2.83	1278	>sp|P02817|AMELX_BOVIN Amelogenin, X isoform OS=Bos taurus OX=9913 GN=AMELX PE=1 SV=2	1	hf1_10472_ebo_28_1_261219.ScanId;v=1;d1=22884.22884.3	controllerType=0 controllerNumber=1 scan=22884	47.5423
35604:4	1	S.MPLPPHPGHPGYIN[+0.984]FSYEVLTPLKWY.Q		N[+1]	764.387	4	3054.53	3054.52	0	1.4	17	Non	51.8	51.8	51.8	0.92	1278	>sp|P02817|AMELX_BOVIN Amelogenin, X isoform OS=Bos taurus OX=9913 GN=AMELX PE=1 SV=2	1	hf1_10472_ebo_28_1_261219.ScanId;v=1;d1=26023.26023.4	controllerType=0 controllerNumber=1 scan=26023	53.0345
39663:4	1	S.MPLPPHPGHPGYINFS[+79.966]YEVLTPLKWY.Q		S[+80]	784.134	4	3133.51	3133.5	0	2.7	17	Non	118.33	118.33	2.9	2.26	1278	>sp|P02817|AMELX_BOVIN Amelogenin, X isoform OS=Bos taurus OX=9913 GN=AMELX PE=1 SV=2	1	hf1_10472_ebo_28_1_261219.ScanId;v=1;d1=28732.28732.4	controllerType=0 controllerNumber=1 scan=28732	57.8487
36430:3	1	S.MPLPPHPGHPGYINFS[+79.966]YEVLTPLKWY.Q		S[+80]	1045.18	3	3133.52	3133.5	0	6	17	Non	129.95	129.95	37.44	2.5	1278	>sp|P02817|AMELX_BOVIN Amelogenin, X isoform OS=Bos taurus OX=9913 GN=AMELX PE=1 SV=2	1	hf1_10472_ebo_28_1_261219.ScanId;v=1;d1=26600.26600.3	controllerType=0 controllerNumber=1 scan=26600	54.0696
34223:4	1	S.MP[+15.995]LPPHPGHPGYINFSYEVLTPLKWY.Q		P[+16]	768.142	4	3069.54	3069.53	0	3.7	17	Non	185.76	185.76	5.8	3.59	1278	>sp|P02817|AMELX_BOVIN Amelogenin, X isoform OS=Bos taurus OX=9913 GN=AMELX PE=1 SV=2	1	hf1_10472_ebo_28_1_261219.ScanId;v=1;d1=25079.25079.4	controllerType=0 controllerNumber=1 scan=25079	51.3765
38050:4	1	S.MPLPPHPGHPGYINFS[+79.966]YEVLTPLKWY.Q		S[+80]	784.133	4	3133.51	3133.5	0	1.3	17	Non	299.18	299.18	17.71	4.93	1278	>sp|P02817|AMELX_BOVIN Amelogenin, X isoform OS=Bos taurus OX=9913 GN=AMELX PE=1 SV=2	1	hf1_10472_ebo_28_1_261219.ScanId;v=1;d1=27671.27671.4	controllerType=0 controllerNumber=1 scan=27671	55.9645
37751:4	1	S.MPLPPHPGHPGYINFS[+79.966]YEVLTPLKWY.Q		S[+80]	784.136	4	3133.52	3133.5	0	5.7	17	Non	310.68	310.68	55.67	6.04	1278	>sp|P02817|AMELX_BOVIN Amelogenin, X isoform OS=Bos taurus OX=9913 GN=AMELX PE=1 SV=2	1	hf1_10472_ebo_28_1_261219.ScanId;v=1;d1=27473.27473.4	controllerType=0 controllerNumber=1 scan=27473	55.6122
37172:4	1	S.MPLPPHPGHPGYINFS[+79.966]YEVLTPLKWY.Q		S[+80]	784.137	4	3133.53	3133.5	0	7.2	17	Non	341.32	341.32	22.42	6.54	1278	>sp|P02817|AMELX_BOVIN Amelogenin, X isoform OS=Bos taurus OX=9913 GN=AMELX PE=1 SV=2	1	hf1_10472_ebo_28_1_261219.ScanId;v=1;d1=27085.27085.4	controllerType=0 controllerNumber=1 scan=27085	54.9267
37462:4	1	S.MPLPPHPGHPGYINFS[+79.966]YEVLTPLKWY.Q		S[+80]	784.138	4	3133.53	3133.5	0	7.6	17	Non	352.89	352.89	44.12	6.72	1278	>sp|P02817|AMELX_BOVIN Amelogenin, X isoform OS=Bos taurus OX=9913 GN=AMELX PE=1 SV=2	1	hf1_10472_ebo_28_1_261219.ScanId;v=1;d1=27278.27278.4	controllerType=0 controllerNumber=1 scan=27278	55.2677
49137:3	1	S.MPLPPHPGHPGYINFS[+79.966]YEVLTPLKWY.Q		S[+80]	1045.18	3	3133.53	3133.5	0	9	17	Non	356.46	356.46	103.46	6.64	1278	>sp|P02817|AMELX_BOVIN Amelogenin, X isoform OS=Bos taurus OX=9913 GN=AMELX PE=1 SV=2	1	hf1_10472_ebo_28_1_261219.ScanId;v=1;d1=35879.35879.3	controllerType=0 controllerNumber=1 scan=35879	73.5189
34429:4	1	S.MP[+15.995]LPPHPGHPGYINFSYEVLTPLKWY.Q		P[+16]	768.142	4	3069.55	3069.53	0	4.2	17	Non	460.64	460.64	5.8	7.84	1278	>sp|P02817|AMELX_BOVIN Amelogenin, X isoform OS=Bos taurus OX=9913 GN=AMELX PE=1 SV=2	1	hf1_10472_ebo_28_1_261219.ScanId;v=1;d1=25223.25223.4	controllerType=0 controllerNumber=1 scan=25223	51.6294
38084:3	1	S.MPLPPHPGHPGYINFS[+79.966]YEVLTPLKWY.Q		S[+80]	1045.18	3	3133.51	3133.5	0	2.1	17	Non	786.78	786.78	252.06	12.14	1278	>sp|P02817|AMELX_BOVIN Amelogenin, X isoform OS=Bos taurus OX=9913 GN=AMELX PE=1 SV=2	1	hf1_10472_ebo_28_1_261219.ScanId;v=1;d1=27693.27693.3	controllerType=0 controllerNumber=1 scan=27693	56.0035
37779:3	1	S.MPLPPHPGHPGYINFS[+79.966]YEVLTPLKWY.Q		S[+80]	1045.18	3	3133.53	3133.5	0	7.7	17	Non	929.09	929.09	369.76	16.28	1278	>sp|P02817|AMELX_BOVIN Amelogenin, X isoform OS=Bos taurus OX=9913 GN=AMELX PE=1 SV=2	1	hf1_10472_ebo_28_1_261219.ScanId;v=1;d1=27492.27492.3	controllerType=0 controllerNumber=1 scan=27492	55.6457
37480:3	1	S.MPLPPHPGHPGYINFS[+79.966]YEVLTPLKWY.Q		S[+80]	1045.18	3	3133.53	3133.5	0	7.2	17	Non	1009.59	1009.59	408.94	18.28	1278	>sp|P02817|AMELX_BOVIN Amelogenin, X isoform OS=Bos taurus OX=9913 GN=AMELX PE=1 SV=2	1	hf1_10472_ebo_28_1_261219.ScanId;v=1;d1=27294.27294.3	controllerType=0 controllerNumber=1 scan=27294	55.2975
19077:3	1	S.MP[+15.995]LPPHPGHPGYINFSYEVLTPLKWY[+15.995].Q		P[+16], Y[+16]	1029.18	3	3085.53	3085.53	0	0.5	17	Non	5.61	5.61	0	0.31	1278	>sp|P02817|AMELX_BOVIN Amelogenin, X isoform OS=Bos taurus OX=9913 GN=AMELX PE=1 SV=2	1	hf1_10472_ebo_28_1_261219.ScanId;v=1;d1=14790.14790.3	controllerType=0 controllerNumber=1 scan=14790	33.5986
34697:4	1	S.MPLPPHPGHPGYINFS[+79.966]YEVLTPLKW[+15.995]Y.Q		S[+80], W[+16]	788.137	4	3149.53	3149.5	0	8.2	17	Non	35.02	35.02	14.05	1.64	1278	>sp|P02817|AMELX_BOVIN Amelogenin, X isoform OS=Bos taurus OX=9913 GN=AMELX PE=1 SV=2	1	hf1_10472_ebo_28_1_261219.ScanId;v=1;d1=25400.25400.4	controllerType=0 controllerNumber=1 scan=25400	51.9393
38654:4	1	S.MP[+15.995]LPPHPGHPGYINFS[+79.966]YEVLTPLKWY.Q		P[+16], S[+80]	788.135	4	3149.52	3149.5	0	6.2	17	Non	89.7	89.7	2.9	2.17	1278	>sp|P02817|AMELX_BOVIN Amelogenin, X isoform OS=Bos taurus OX=9913 GN=AMELX PE=1 SV=2	1	hf1_10472_ebo_28_1_261219.ScanId;v=1;d1=28073.28073.4	controllerType=0 controllerNumber=1 scan=28073	56.68
36871:4	1	S.MPLPPHPGHPGYINFS[+79.966]YEVLTPLKW[+31.990]Y.Q		S[+80], W[+32]	792.134	4	3165.51	3165.49	0	6.4	17	Non	93.42	93.42	11.2	2.19	1278	>sp|P02817|AMELX_BOVIN Amelogenin, X isoform OS=Bos taurus OX=9913 GN=AMELX PE=1 SV=2	1	hf1_10472_ebo_28_1_261219.ScanId;v=1;d1=26887.26887.4	controllerType=0 controllerNumber=1 scan=26887	54.5773
37397:3	1	S.MPLPPHPGHPGYINFS[+79.966]YEVLTPLKWY[+31.990].Q		S[+80], Y[+32]	1055.84	3	3165.5	3165.49	0	2.4	17	Non	120.12	120.12	0	2.25	1278	>sp|P02817|AMELX_BOVIN Amelogenin, X isoform OS=Bos taurus OX=9913 GN=AMELX PE=1 SV=2	1	hf1_10472_ebo_28_1_261219.ScanId;v=1;d1=27236.27236.3	controllerType=0 controllerNumber=1 scan=27236	55.1929
36247:4	1	S.MPLPPHPGHPGYINFS[+79.966]YEVLTPLKW[+31.990]Y.Q		S[+80], W[+32]	792.134	4	3165.52	3165.49	0	6.6	17	Non	128	128	5.69	2.69	1278	>sp|P02817|AMELX_BOVIN Amelogenin, X isoform OS=Bos taurus OX=9913 GN=AMELX PE=1 SV=2	1	hf1_10472_ebo_28_1_261219.ScanId;v=1;d1=26472.26472.4	controllerType=0 controllerNumber=1 scan=26472	53.8453
36025:5	1	S.MP[+15.995]LPPHPGHPGYINFS[+79.966]YEVLTPLKWY.Q		P[+16], S[+80]	630.709	5	3149.52	3149.5	0	5.5	17	Non	142.84	142.84	0.13	2.49	1278	>sp|P02817|AMELX_BOVIN Amelogenin, X isoform OS=Bos taurus OX=9913 GN=AMELX PE=1 SV=2	1	hf1_10472_ebo_28_1_261219.ScanId;v=1;d1=26318.26318.5	controllerType=0 controllerNumber=1 scan=26318	53.5678
35903:4	1	S.M[+15.995]PLPPHPGHPGYINFS[+79.966]YEVLTPLKWY.Q		M[+16], S[+80]	788.135	4	3149.52	3149.5	0	6.5	17	Non	204.17	204.17	7.2	4.26	1278	>sp|P02817|AMELX_BOVIN Amelogenin, X isoform OS=Bos taurus OX=9913 GN=AMELX PE=1 SV=2	1	hf1_10472_ebo_28_1_261219.ScanId;v=1;d1=26235.26235.4	controllerType=0 controllerNumber=1 scan=26235	53.4186
35817:4	1	S.MPLPPHPGHPGYINFS[+79.966]Y[+31.990]EVLTPLKWY.Q		S[+80], Y[+32]	792.134	4	3165.51	3165.49	0	5.9	17	Non	216.5	216.5	19.89	4.01	1278	>sp|P02817|AMELX_BOVIN Amelogenin, X isoform OS=Bos taurus OX=9913 GN=AMELX PE=1 SV=2	1	hf1_10472_ebo_28_1_261219.ScanId;v=1;d1=26176.26176.4	controllerType=0 controllerNumber=1 scan=26176	53.3123
37362:4	1	S.MPLPP[+15.995]HPGHPGYINFS[+79.966]YEVLTPLKWY.Q		P[+16], S[+80]	788.132	4	3149.51	3149.5	0	2.6	17	Non	228.78	228.78	2.61	3.77	1278	>sp|P02817|AMELX_BOVIN Amelogenin, X isoform OS=Bos taurus OX=9913 GN=AMELX PE=1 SV=2	1	hf1_10472_ebo_28_1_261219.ScanId;v=1;d1=27212.27212.4	controllerType=0 controllerNumber=1 scan=27212	55.1509
36544:4	1	S.MPLPPHPGHPGYINFS[+79.966]YEVLTPLKW[+31.990]Y.Q		S[+80], W[+32]	792.135	4	3165.52	3165.49	0	7.5	17	Non	240.53	240.53	17.24	5.69	1278	>sp|P02817|AMELX_BOVIN Amelogenin, X isoform OS=Bos taurus OX=9913 GN=AMELX PE=1 SV=2	1	hf1_10472_ebo_28_1_261219.ScanId;v=1;d1=26674.26674.4	controllerType=0 controllerNumber=1 scan=26674	54.2036
49176:4	1	S.MP[+15.995]LPPHPGHPGYINFS[+79.966]YEVLTPLKWY.Q		P[+16], S[+80]	788.138	4	3149.53	3149.5	0	9.4	17	Non	285.16	285.16	5.8	5.36	1278	>sp|P02817|AMELX_BOVIN Amelogenin, X isoform OS=Bos taurus OX=9913 GN=AMELX PE=1 SV=2	1	hf1_10472_ebo_28_1_261219.ScanId;v=1;d1=35908.35908.4	controllerType=0 controllerNumber=1 scan=35908	73.5709
36466:4	1	S.MP[+15.995]LPPHPGHPGYINFS[+79.966]YEVLTPLKWY.Q		P[+16], S[+80]	788.135	4	3149.52	3149.5	0	6.6	17	Non	303.16	303.16	5.8	6.07	1278	>sp|P02817|AMELX_BOVIN Amelogenin, X isoform OS=Bos taurus OX=9913 GN=AMELX PE=1 SV=2	1	hf1_10472_ebo_28_1_261219.ScanId;v=1;d1=26624.26624.4	controllerType=0 controllerNumber=1 scan=26624	54.1138
38051:4	1	S.MPLPPHPGHPGYIN[+0.984]FS[+79.966]YEVLTPLKWY.Q		N[+1], S[+80]	784.384	4	3134.51	3134.49	0	7.9	17	Non	303.27	303.27	38.76	6.07	1278	>sp|P02817|AMELX_BOVIN Amelogenin, X isoform OS=Bos taurus OX=9913 GN=AMELX PE=1 SV=2	1	hf1_10472_ebo_28_1_261219.ScanId;v=1;d1=27671.27671.4	controllerType=0 controllerNumber=1 scan=27671	55.9645
36185:4	1	S.MP[+15.995]LPPHPGHPGYINFS[+79.966]YEVLTPLKWY.Q		P[+16], S[+80]	788.135	4	3149.52	3149.5	0	6.5	17	Non	323.05	323.05	4	6.3	1278	>sp|P02817|AMELX_BOVIN Amelogenin, X isoform OS=Bos taurus OX=9913 GN=AMELX PE=1 SV=2	1	hf1_10472_ebo_28_1_261219.ScanId;v=1;d1=26431.26431.4	controllerType=0 controllerNumber=1 scan=26431	53.7751
36854:3	1	S.MPLPPHPGHPGYINFS[+79.966]YEVLTPLKW[+31.990]Y.Q		S[+80], W[+32]	1055.84	3	3165.51	3165.49	0	6.5	17	Non	330.02	330.02	11	6.25	1278	>sp|P02817|AMELX_BOVIN Amelogenin, X isoform OS=Bos taurus OX=9913 GN=AMELX PE=1 SV=2	1	hf1_10472_ebo_28_1_261219.ScanId;v=1;d1=26876.26876.4	controllerType=0 controllerNumber=1 scan=26876	54.5578
38356:4	1	S.MPLPPHPGHPGYIN[+0.984]FS[+79.966]YEVLTPLKWY.Q		N[+1], S[+80]	784.383	4	3134.51	3134.49	0	6.5	17	Non	330.86	330.86	52.94	6.54	1278	>sp|P02817|AMELX_BOVIN Amelogenin, X isoform OS=Bos taurus OX=9913 GN=AMELX PE=1 SV=2	1	hf1_10472_ebo_28_1_261219.ScanId;v=1;d1=27867.27867.4	controllerType=0 controllerNumber=1 scan=27867	56.312
37056:4	1	S.MP[+15.995]LPPHPGHPGYINFS[+79.966]YEVLTPLKWY.Q		P[+16], S[+80]	788.133	4	3149.51	3149.5	0	3.5	17	Non	332.62	332.62	5.8	6.03	1278	>sp|P02817|AMELX_BOVIN Amelogenin, X isoform OS=Bos taurus OX=9913 GN=AMELX PE=1 SV=2	1	hf1_10472_ebo_28_1_261219.ScanId;v=1;d1=27015.27015.4	controllerType=0 controllerNumber=1 scan=27015	54.8041
36760:4	1	S.MP[+15.995]LPPHPGHPGYINFS[+79.966]YEVLTPLKWY.Q		P[+16], S[+80]	788.134	4	3149.51	3149.5	0	4.2	17	Non	332.68	332.68	5.8	6.03	1278	>sp|P02817|AMELX_BOVIN Amelogenin, X isoform OS=Bos taurus OX=9913 GN=AMELX PE=1 SV=2	1	hf1_10472_ebo_28_1_261219.ScanId;v=1;d1=26817.26817.4	controllerType=0 controllerNumber=1 scan=26817	54.4542
37294:3	1	S.MP[+15.995]LPPHPGHPGYINFS[+79.966]YEVLTPLKWY.Q		P[+16], S[+80]	1050.51	3	3149.51	3149.5	0	4.3	17	Non	474.21	474.21	14.06	7.12	1278	>sp|P02817|AMELX_BOVIN Amelogenin, X isoform OS=Bos taurus OX=9913 GN=AMELX PE=1 SV=2	1	hf1_10472_ebo_28_1_261219.ScanId;v=1;d1=27169.27169.3	controllerType=0 controllerNumber=1 scan=27169	55.0755
36690:3	1	S.M[+15.995]PLPPHPGHPGYINFS[+79.966]YEVLTPLKWY.Q		M[+16], S[+80]	1050.51	3	3149.52	3149.5	0	6.3	17	Non	589.18	589.18	5.85	9.02	1278	>sp|P02817|AMELX_BOVIN Amelogenin, X isoform OS=Bos taurus OX=9913 GN=AMELX PE=1 SV=2	1	hf1_10472_ebo_28_1_261219.ScanId;v=1;d1=26772.26772.3	controllerType=0 controllerNumber=1 scan=26772	54.3765
36997:3	1	S.M[+15.995]PLPPHPGHPGYINFS[+79.966]YEVLTPLKWY.Q		M[+16], S[+80]	1050.51	3	3149.51	3149.5	0	3.5	17	Non	682.87	682.87	17.81	10.77	1278	>sp|P02817|AMELX_BOVIN Amelogenin, X isoform OS=Bos taurus OX=9913 GN=AMELX PE=1 SV=2	1	hf1_10472_ebo_28_1_261219.ScanId;v=1;d1=26974.26974.3	controllerType=0 controllerNumber=1 scan=26974	54.7309
38383:3	1	S.MPLPPHPGHPGYIN[+0.984]FS[+79.966]YEVLTPLKWY.Q		N[+1], S[+80]	1045.51	3	3134.51	3134.49	0	7.4	17	Non	808.2	808.2	369.14	14.28	1278	>sp|P02817|AMELX_BOVIN Amelogenin, X isoform OS=Bos taurus OX=9913 GN=AMELX PE=1 SV=2	1	hf1_10472_ebo_28_1_261219.ScanId;v=1;d1=27888.27888.3	controllerType=0 controllerNumber=1 scan=27888	56.3522
36400:3	1	S.M[+15.995]PLPPHPGHPGYINFS[+79.966]YEVLTPLKWY.Q		M[+16], S[+80]	1050.51	3	3149.52	3149.5	0	6.6	17	Non	837.69	837.69	27.89	14.28	1278	>sp|P02817|AMELX_BOVIN Amelogenin, X isoform OS=Bos taurus OX=9913 GN=AMELX PE=1 SV=2	1	hf1_10472_ebo_28_1_261219.ScanId;v=1;d1=26580.26580.3	controllerType=0 controllerNumber=1 scan=26580	54.0379
38085:3	1	S.MPLPPHPGHPGYIN[+0.984]FS[+79.966]YEVLTPLKWY.Q		N[+1], S[+80]	1045.51	3	3134.51	3134.49	0	7.6	17	Non	849.69	849.69	343.04	14.28	1278	>sp|P02817|AMELX_BOVIN Amelogenin, X isoform OS=Bos taurus OX=9913 GN=AMELX PE=1 SV=2	1	hf1_10472_ebo_28_1_261219.ScanId;v=1;d1=27693.27693.3	controllerType=0 controllerNumber=1 scan=27693	56.0035
36120:3	1	S.M[+15.995]PLPPHPGHPGYINFS[+79.966]YEVLTPLKWY.Q		M[+16], S[+80]	1050.51	3	3149.52	3149.5	0	6.4	17	Non	1012.23	1012.23	32.56	18.02	1278	>sp|P02817|AMELX_BOVIN Amelogenin, X isoform OS=Bos taurus OX=9913 GN=AMELX PE=1 SV=2	1	hf1_10472_ebo_28_1_261219.ScanId;v=1;d1=26388.26388.3	controllerType=0 controllerNumber=1 scan=26388	53.7
33684:4	1	S.MP[+15.995]LPPHPGHPGYINFS[+79.966]YEVLTPLKW[+15.995]Y.Q		P[+16], S[+80], W[+16]	792.133	4	3165.51	3165.49	0	5.5	17	Non	1.04	1.04	1.04	0.98	1278	>sp|P02817|AMELX_BOVIN Amelogenin, X isoform OS=Bos taurus OX=9913 GN=AMELX PE=1 SV=2	1	hf1_10472_ebo_28_1_261219.ScanId;v=1;d1=24727.24727.4	controllerType=0 controllerNumber=1 scan=24727	50.7625
36183:4	1	S.MPLPPHPGHPGY[+15.995]INF[+31.990]SY[+31.990]EVLTPLKWY.Q		F[+32], Y[+16][+32]	784.135	4	3133.52	3133.51	0	1.1	17	Non	6.72	6.72	6.72	0.92	1278	>sp|P02817|AMELX_BOVIN Amelogenin, X isoform OS=Bos taurus OX=9913 GN=AMELX PE=1 SV=2	1	hf1_10472_ebo_28_1_261219.ScanId;v=1;d1=26429.26429.4	controllerType=0 controllerNumber=1 scan=26429	53.7694
34156:4	1	S.MP[+15.995]LPPHPGHPGYINFS[+79.966]YEVLTPLKW[+15.995]Y.Q		P[+16], S[+80], W[+16]	792.135	4	3165.52	3165.49	0	7.2	17	Non	27.37	27.37	0.56	1.03	1278	>sp|P02817|AMELX_BOVIN Amelogenin, X isoform OS=Bos taurus OX=9913 GN=AMELX PE=1 SV=2	1	hf1_10472_ebo_28_1_261219.ScanId;v=1;d1=25035.25035.4	controllerType=0 controllerNumber=1 scan=25035	51.2996
32857:4	1	S.MP[+15.995]LPPHPGHPGYINFS[+79.966]YEVLTPLKW[+31.990]Y.Q		P[+16], S[+80], W[+32]	796.133	4	3181.51	3181.49	0	6.7	17	Non	31.16	31.16	12.33	1.64	1278	>sp|P02817|AMELX_BOVIN Amelogenin, X isoform OS=Bos taurus OX=9913 GN=AMELX PE=1 SV=2	1	hf1_10472_ebo_28_1_261219.ScanId;v=1;d1=24164.24164.4	controllerType=0 controllerNumber=1 scan=24164	49.7779
43982:4	1	S.MPLP[+15.995]PHPGHPGY[+31.990]INF[+31.990]SYEVLTPLKWY.Q		F[+32], P[+16], Y[+32]	784.134	4	3133.52	3133.51	0	0.9	17	Non	36.74	36.74	0	0.92	1278	>sp|P02817|AMELX_BOVIN Amelogenin, X isoform OS=Bos taurus OX=9913 GN=AMELX PE=1 SV=2	1	hf1_10472_ebo_28_1_261219.ScanId;v=1;d1=31559.31559.4	controllerType=0 controllerNumber=1 scan=31559	62.8801
40727:4	1	S.MPLPPHPGHPGY[+31.990]INF[+31.990]SY[+15.995]EVLTPLKWY.Q		F[+32], Y[+16][+32]	784.137	4	3133.52	3133.51	0	3.8	17	Non	36.79	36.79	1.5	2.19	1278	>sp|P02817|AMELX_BOVIN Amelogenin, X isoform OS=Bos taurus OX=9913 GN=AMELX PE=1 SV=2	1	hf1_10472_ebo_28_1_261219.ScanId;v=1;d1=29432.29432.4	controllerType=0 controllerNumber=1 scan=29432	59.0925
41016:4	1	S.MPLPPHPGHPGY[+15.995]INF[+31.990]SY[+31.990]EVLTPLKWY.Q		F[+32], Y[+16][+32]	784.138	4	3133.53	3133.51	0	5.1	17	Non	57.43	57.43	14.67	2.22	1278	>sp|P02817|AMELX_BOVIN Amelogenin, X isoform OS=Bos taurus OX=9913 GN=AMELX PE=1 SV=2	1	hf1_10472_ebo_28_1_261219.ScanId;v=1;d1=29627.29627.4	controllerType=0 controllerNumber=1 scan=29627	59.4399
40100:3	1	S.MPLPPHPGHP[+31.990]GY[+15.995]INF[+31.990]SYEVLTPLKWY.Q		F[+32], P[+32], Y[+16]	1045.18	3	3133.53	3133.51	0	5	17	Non	59.94	59.94	3.5	1.13	1278	>sp|P02817|AMELX_BOVIN Amelogenin, X isoform OS=Bos taurus OX=9913 GN=AMELX PE=1 SV=2	1	hf1_10472_ebo_28_1_261219.ScanId;v=1;d1=29015.29015.3	controllerType=0 controllerNumber=1 scan=29015	58.3527
33280:4	1	S.MP[+15.995]LPPHPGHPGYINFS[+79.966]YEVLTPLKW[+15.995]Y.Q		P[+16], S[+80], W[+16]	792.135	4	3165.52	3165.49	0	7.2	17	Non	71.64	71.64	1.88	1.69	1278	>sp|P02817|AMELX_BOVIN Amelogenin, X isoform OS=Bos taurus OX=9913 GN=AMELX PE=1 SV=2	1	hf1_10472_ebo_28_1_261219.ScanId;v=1;d1=24450.24450.4	controllerType=0 controllerNumber=1 scan=24450	50.2776
44653:4	1	S.MPLPPHPGHPGY[+15.995]INF[+31.990]SY[+31.990]EVLTPLKWY.Q		F[+32], Y[+16][+32]	784.137	4	3133.53	3133.51	0	3.9	17	Non	79.58	79.58	14.11	2.19	1278	>sp|P02817|AMELX_BOVIN Amelogenin, X isoform OS=Bos taurus OX=9913 GN=AMELX PE=1 SV=2	1	hf1_10472_ebo_28_1_261219.ScanId;v=1;d1=31995.31995.4	controllerType=0 controllerNumber=1 scan=31995	63.6597
32633:4	1	S.MP[+15.995]LPPHPGHPGYINFS[+79.966]YEVLTPLKW[+15.995]Y.Q		P[+16], S[+80], W[+16]	792.134	4	3165.52	3165.49	0	6.6	17	Non	85.59	85.59	5.8	2.19	1278	>sp|P02817|AMELX_BOVIN Amelogenin, X isoform OS=Bos taurus OX=9913 GN=AMELX PE=1 SV=2	1	hf1_10472_ebo_28_1_261219.ScanId;v=1;d1=24015.24015.4	controllerType=0 controllerNumber=1 scan=24015	49.5167
39337:4	1	S.MPLPPHPGHPGY[+15.995]INF[+31.990]SY[+31.990]EVLTPLKWY.Q		F[+32], Y[+16][+32]	784.137	4	3133.53	3133.51	0	4.6	17	Non	89.98	89.98	11.99	2.33	1278	>sp|P02817|AMELX_BOVIN Amelogenin, X isoform OS=Bos taurus OX=9913 GN=AMELX PE=1 SV=2	1	hf1_10472_ebo_28_1_261219.ScanId;v=1;d1=28521.28521.4	controllerType=0 controllerNumber=1 scan=28521	57.4756
36508:4	1	S.MPLPPHPGHPGY[+15.995]INF[+31.990]SY[+31.990]EVLTPLKWY.Q		F[+32], Y[+16][+32]	784.136	4	3133.52	3133.51	0	2.8	17	Non	96.82	96.82	21.71	2.26	1278	>sp|P02817|AMELX_BOVIN Amelogenin, X isoform OS=Bos taurus OX=9913 GN=AMELX PE=1 SV=2	1	hf1_10472_ebo_28_1_261219.ScanId;v=1;d1=26650.26650.4	controllerType=0 controllerNumber=1 scan=26650	54.1588
39011:4	1	S.MPLPPHPGHPGY[+15.995]INF[+31.990]SY[+31.990]EVLTPLKWY.Q		F[+32], Y[+16][+32]	784.137	4	3133.53	3133.51	0	3.9	17	Non	103.71	103.71	15.04	2.64	1278	>sp|P02817|AMELX_BOVIN Amelogenin, X isoform OS=Bos taurus OX=9913 GN=AMELX PE=1 SV=2	1	hf1_10472_ebo_28_1_261219.ScanId;v=1;d1=28304.28304.4	controllerType=0 controllerNumber=1 scan=28304	57.0886
33333:4	1	S.MP[+15.995]LPPHPGHPGYINFS[+79.966]YEVLTPLKW[+15.995]Y.Q		P[+16], S[+80], W[+16]	792.133	4	3165.51	3165.49	0	5.5	17	Non	142.02	142.02	5.8	2.53	1278	>sp|P02817|AMELX_BOVIN Amelogenin, X isoform OS=Bos taurus OX=9913 GN=AMELX PE=1 SV=2	1	hf1_10472_ebo_28_1_261219.ScanId;v=1;d1=24488.24488.4	controllerType=0 controllerNumber=1 scan=24488	50.3451
37372:5	1	S.MPLPPHPGHPGY[+15.995]INF[+31.990]SY[+31.990]EVLTPLKWY.Q		F[+32], Y[+16][+32]	627.511	5	3133.53	3133.51	0	4.6	17	Non	158.9	158.9	6.1	2.72	1278	>sp|P02817|AMELX_BOVIN Amelogenin, X isoform OS=Bos taurus OX=9913 GN=AMELX PE=1 SV=2	1	hf1_10472_ebo_28_1_261219.ScanId;v=1;d1=27218.27218.5	controllerType=0 controllerNumber=1 scan=27218	55.16
[truncated: 2,727 more rows]

## Sheet: Proteins
Protein Rank	Description	|Log Prob|	Best |Log Prob|	Best score	Total Intensity	# of spectra	# of unique peptides	# of mod peptides	Coverage %	# AA's in protein	Protein DB number
[truncated: 4 more rows]
