# Supplementary material for: A Peptidomics Method for Assessing Sex from Modern and Ancient Bovine Tooth Enamel.
Source: Research Square preprint supplement (doi:10.21203/rs.3.rs-3766361/v1), 2024-01-29
Supplement: Supplementary file 3 [file 1f6da40a7f368daae22f2b5c.xlsx]

## Sheet: Summary
Summary:
	1) Input data file: H:\Proteomics\Projects\Boaretto\INCPM_10472\Raw_files\HF1_10472_EBO_32_1_261219.raw
	2) Protein database: H:\Proteomics\Projects\Boaretto\INCPM_18273\AMELs Cattle fasta Pau 2.Fasta
	3) Parameter file: D:\Boaretto\HF1_10472_EBO_32_1_261219.raw_20230418_Amel\objs\params.prf
	4) Date/Time: April 18, 2023 4:03:30 PM IDT
	5) RunTime: 3 hours, 43 minutes, 22 seconds; on 34 cores
Summary Statistics:
	1) Reporting 2 forward and 2 reverse proteins
	2) 1717 unique forward peptides
	3) 4360 spectra matched to forward peptides
	4) Estimated spectrum-level FDR on true proteins is 0.2%
Recorded protein search configuration:
Num	Rule	Value
0	Protein database	H:\Proteomics\Projects\Boaretto\INCPM_18273\AMELs Cattle fasta Pau 2.Fasta
1	Spectrum-level FDR	Auto cut
2	Cleavage residues	KR
3	Digest cutter	C-terminal cutter
4	Peptide termini	Non specific
5	Maximum number of missed cleavages	Any missed cleavages (-1)
6	Precursor tolerance	10.0 ppm
7	Fragment tolerance	frag:qtof_hcd 20.0 ppm
8	Fragment tolerance version	2
9	Charges applied to charge-unassigned spectra:	1,2,3
10	Precursor mass max	7500.0
11	N-glycan search	None
12	O-glycan search	None
13	Off by x isotopes	-2,-1,0,+1,+2
14	Contaminants added	false
15	Decoys added	true
16	%Additional parameters:
17	Disulfide Enable	false
18	Trisulfide Enable	false
19	DSS Crosslink Enable	false
20	Custom Crosslink Enable	false
21	Wildcard Enable	0
22	Combyne cut off score	Auto
23	Protein FDR cutoff	1%
24	Focused DB created	true
25	Export mzIdentML	true
26	Score version	2
27	precursor_assignment_flags	2
28	po_NumberMonosReturn	2
29	Lock mass list	None
30	do_quick_rejects	0
31	%Modification searches:
32	common_modifications_max	2
33	rare_modifications_max	2
34	%Fixed and variable modifications:
35	Oxidation / +15.994915 @ F, H, K, M, P, W, Y | common2
36	Deamidated / +0.984016 @ N, Q, R | common2
37	Acetyl / +42.010565 @ Protein NTerm | rare1
38	Dioxidation / +31.989829 @ F, M, P, W, Y | rare2
39	Gln->pyro-Glu / -17.026549 @ Protein NTerm Q | rare1
40	Glu->pyro-Glu / -18.010565 @ Protein NTerm E | rare1
41	Phospho / +79.966331 @ S | rare1
42	% Custom modification text below
43	%Glycan modifications:
44	% Custom modification text below
45	Show all N-glycopeptides	0
46	%Addition parameters:
47	Product Version	PMI-Byonic-Com:v4.6.1
48	Registered to	david Morgenstern G-INCPM

## Sheet: Spectra
Query #:z	Protein Rank	Peptide < ProteinMetrics Confidential >	Glycans NHFAGNa	Modification Type(s)	Observed m/z	z	Observed (M+H)	Calc. mass (M+H)	Off-by-x error	Mass error (ppm)	Starting position	Cleavage	Score	Delta	Delta Mod	|Log Prob|	# of unique peptides	Protein Name	Protein DB number	Comment	Scan #	Scan Time
39251:5	1	G.TW[+31.990]ILFACLLGAAFSMPLP[+31.990]PHPGHPGYIN[+0.984]FSYEVLTPLKWYQSMIR.H		N[+1], P[+32], W[+32]	1046.52	5	5228.58	5227.59	1	-2.5	3	NRagged	456.2	456.2	0	6.79	1651	>sp|P02817|AMELX_BOVIN Amelogenin, X isoform OS=Bos taurus OX=9913 GN=AMELX PE=1 SV=2	1	hf1_10472_ebo_32_1_261219.ScanId;v=1;d1=28438.28438.2	controllerType=0 controllerNumber=1 scan=28438	56.5891
22757:4	1	T.W[+31.990]ILFACLLGAAFSMPLPPHPGHPGYINF.S		W[+32]	775.394	4	3098.55	3098.54	0	3.5	4	Non	284.15	19.81	17.75	2.32	1651	>sp|P02817|AMELX_BOVIN Amelogenin, X isoform OS=Bos taurus OX=9913 GN=AMELX PE=1 SV=2	1	hf1_10472_ebo_32_1_261219.ScanId;v=1;d1=17535.17535.4	controllerType=0 controllerNumber=1 scan=17535	37.6685
31429:6	1	T.WILFACLLGAAFSMPLPPHPGHPGYIN[+0.984]FS[+79.966]YEVLTPLK.W		N[+1], S[+80]	697.184	6	4178.07	4178.07	0	-0.4	4	NRagged	277.76	154.24	88.02	2.48	1651	>sp|P02817|AMELX_BOVIN Amelogenin, X isoform OS=Bos taurus OX=9913 GN=AMELX PE=1 SV=2	1	hf1_10472_ebo_32_1_261219.ScanId;v=1;d1=23292.23292.4	controllerType=0 controllerNumber=1 scan=23292	47.5274
31123:6	1	T.WILFACLLGAAFSMPLPPHPGHPGYIN[+0.984]FS[+79.966]YEVLTPLK.W		N[+1], S[+80]	697.35	6	4179.07	4178.07	1	-2.4	4	NRagged	367.72	212.99	212.99	3.87	1651	>sp|P02817|AMELX_BOVIN Amelogenin, X isoform OS=Bos taurus OX=9913 GN=AMELX PE=1 SV=2	1	hf1_10472_ebo_32_1_261219.ScanId;v=1;d1=23092.23092.4	controllerType=0 controllerNumber=1 scan=23092	47.1811
36911:5	1	I.LFACLLGAAFSMPLPP[+31.990]HPGHPGYINFS[+79.966]YEVLTPLKWYQSM[+15.995]IR.H		M[+16], P[+32], S[+80]	979.082	5	4891.38	4890.37	1	1.4	6	NRagged	324.26	324.26	2.07	5.73	1651	>sp|P02817|AMELX_BOVIN Amelogenin, X isoform OS=Bos taurus OX=9913 GN=AMELX PE=1 SV=2	1	hf1_10472_ebo_32_1_261219.ScanId;v=1;d1=26908.26908.3	controllerType=0 controllerNumber=1 scan=26908	53.8681
31499:5	1	L.FACLLGAAFSMPLPPHPGHPGY[+31.990]INF[+31.990]SYEVLTPLKW[+15.995]YQSM[+15.995]IR.H		F[+32], M[+16], W[+16], Y[+32]	949.672	5	4744.33	4745.3	-1	6.1	7	NRagged	43.36	43.36	3.59	2.33	1651	>sp|P02817|AMELX_BOVIN Amelogenin, X isoform OS=Bos taurus OX=9913 GN=AMELX PE=1 SV=2	1	hf1_10472_ebo_32_1_261219.ScanId;v=1;d1=23335.23335.4	controllerType=0 controllerNumber=1 scan=23335	47.6026
49804:3	1	F.ACLLGAAFSMPLPPHPGHPGYINF.S			836.424	3	2507.26	2507.24	0	7.9	8	Non	106.16	106.16	106.16	2.3	1651	>sp|P02817|AMELX_BOVIN Amelogenin, X isoform OS=Bos taurus OX=9913 GN=AMELX PE=1 SV=2	1	hf1_10472_ebo_32_1_261219.ScanId;v=1;d1=36275.36275.3	controllerType=0 controllerNumber=1 scan=36275	73.1938
48947:3	1	F.ACLLGAAFSMPLPPHPGHPGYINF.S			836.42	3	2507.25	2507.24	0	3.8	8	Non	134.22	134.22	134.22	2.41	1651	>sp|P02817|AMELX_BOVIN Amelogenin, X isoform OS=Bos taurus OX=9913 GN=AMELX PE=1 SV=2	1	hf1_10472_ebo_32_1_261219.ScanId;v=1;d1=35554.35554.3	controllerType=0 controllerNumber=1 scan=35554	71.4875
47811:3	1	F.ACLLGAAFSMPLPPHPGHPGYINF.S			836.421	3	2507.25	2507.24	0	4.8	8	Non	155.41	155.41	155.41	2.51	1651	>sp|P02817|AMELX_BOVIN Amelogenin, X isoform OS=Bos taurus OX=9913 GN=AMELX PE=1 SV=2	1	hf1_10472_ebo_32_1_261219.ScanId;v=1;d1=34618.34618.3	controllerType=0 controllerNumber=1 scan=34618	69.4125
49146:3	1	F.ACLLGAAFSMPLPPHPGHPGYINF.S			836.422	3	2507.25	2507.24	0	5.4	8	Non	157.9	157.9	157.9	2.73	1651	>sp|P02817|AMELX_BOVIN Amelogenin, X isoform OS=Bos taurus OX=9913 GN=AMELX PE=1 SV=2	1	hf1_10472_ebo_32_1_261219.ScanId;v=1;d1=35712.35712.3	controllerType=0 controllerNumber=1 scan=35712	71.8286
49329:3	1	F.ACLLGAAFSMPLPPHPGHPGYINF.S			836.419	3	2507.24	2507.24	0	2.1	8	Non	168.5	168.5	168.5	2.63	1651	>sp|P02817|AMELX_BOVIN Amelogenin, X isoform OS=Bos taurus OX=9913 GN=AMELX PE=1 SV=2	1	hf1_10472_ebo_32_1_261219.ScanId;v=1;d1=35861.35861.3	controllerType=0 controllerNumber=1 scan=35861	72.1727
48754:3	1	F.ACLLGAAFSMPLPPHPGHPGYINF.S			836.418	3	2507.24	2507.24	0	1.1	8	Non	181.09	169.48	169.48	2.89	1651	>sp|P02817|AMELX_BOVIN Amelogenin, X isoform OS=Bos taurus OX=9913 GN=AMELX PE=1 SV=2	1	hf1_10472_ebo_32_1_261219.ScanId;v=1;d1=35403.35403.3	controllerType=0 controllerNumber=1 scan=35403	71.1438
11429:4	1	A.CLLGAAFSMPLPPHPGH.P			436.973	4	1744.87	1744.87	0	3.1	9	Non	189.92	189.92	189.92	2.43	1651	>sp|P02817|AMELX_BOVIN Amelogenin, X isoform OS=Bos taurus OX=9913 GN=AMELX PE=1 SV=2	1	hf1_10472_ebo_32_1_261219.ScanId;v=1;d1=9726.9726.3	controllerType=0 controllerNumber=1 scan=9726	24.1191
39168:6	1	A.CLLGAAF[+15.995]SM[+31.990]PLPPHPGHP[+15.995]GYINFSYEVLTPLKWYQSMIR.H		F[+16], M[+32], P[+16]	750.034	6	4495.17	4495.21	0	-9.1	9	NRagged	475.84	475.84	9.15	6.07	1651	>sp|P02817|AMELX_BOVIN Amelogenin, X isoform OS=Bos taurus OX=9913 GN=AMELX PE=1 SV=2	1	hf1_10472_ebo_32_1_261219.ScanId;v=1;d1=28388.28388.5	controllerType=0 controllerNumber=1 scan=28388	56.499
39425:7	1	C.LLGAAFSMPLPPHP[+31.990]GHPGYIN[+0.984]FSYEVLTPLKWYQ[+0.984]SMIRHPYP.S		N[+1], P[+32], Q[+1]	694.781	7	4857.42	4856.4	1	3.1	10	Non	115.69	115.69	0.03	1.4	1651	>sp|P02817|AMELX_BOVIN Amelogenin, X isoform OS=Bos taurus OX=9913 GN=AMELX PE=1 SV=2	1	hf1_10472_ebo_32_1_261219.ScanId;v=1;d1=28549.28549.6	controllerType=0 controllerNumber=1 scan=28549	56.7859
38763:6	1	G.AAFSM[+31.990]P[+31.990]LPPHPGHPGYIN[+0.984]FSYEVLTPLKWYQ[+0.984]SMIR.H		M[+32], N[+1], P[+32], Q[+1]	686.173	6	4112	4110.98	1	4.9	13	NRagged	127.86	127.86	0	2.72	1651	>sp|P02817|AMELX_BOVIN Amelogenin, X isoform OS=Bos taurus OX=9913 GN=AMELX PE=1 SV=2	1	hf1_10472_ebo_32_1_261219.ScanId;v=1;d1=28129.28129.5	controllerType=0 controllerNumber=1 scan=28129	56.0321
18413:3	1	A.FSMPLPPHPGHPGYINF.S			636.644	3	1907.92	1907.93	0	-4.1	15	Non	188.52	188.52	188.52	2.82	1651	>sp|P02817|AMELX_BOVIN Amelogenin, X isoform OS=Bos taurus OX=9913 GN=AMELX PE=1 SV=2	1	hf1_10472_ebo_32_1_261219.ScanId;v=1;d1=14499.14499.3	controllerType=0 controllerNumber=1 scan=14499	32.4067
15436:2	1	F.SMPLPPHPG.H			466.74	2	932.472	932.466	0	6.8	16	Non	234.25	196.21	196.21	2.81	1651	>sp|P02817|AMELX_BOVIN Amelogenin, X isoform OS=Bos taurus OX=9913 GN=AMELX PE=1 SV=2	1	hf1_10472_ebo_32_1_261219.ScanId;v=1;d1=12442.12442.2	controllerType=0 controllerNumber=1 scan=12442	28.8749
15087:2	1	F.SMPLPPHPG.H			466.74	2	932.472	932.466	0	6.8	16	Non	255.5	182.56	182.56	4.29	1651	>sp|P02817|AMELX_BOVIN Amelogenin, X isoform OS=Bos taurus OX=9913 GN=AMELX PE=1 SV=2	1	hf1_10472_ebo_32_1_261219.ScanId;v=1;d1=12219.12219.2	controllerType=0 controllerNumber=1 scan=12219	28.4875
10026:2	1	F.SM[+15.995]PLPPHPG.H		M[+16]	474.737	2	948.466	948.461	0	5.7	16	Non	174.93	174.93	147.92	2.41	1651	>sp|P02817|AMELX_BOVIN Amelogenin, X isoform OS=Bos taurus OX=9913 GN=AMELX PE=1 SV=2	1	hf1_10472_ebo_32_1_261219.ScanId;v=1;d1=8760.8760.2	controllerType=0 controllerNumber=1 scan=8760	22.4147
09205:2	1	F.SM[+15.995]PLPPHPG.H		M[+16]	474.736	2	948.464	948.461	0	3.7	16	Non	204.75	204.75	186.33	2.87	1651	>sp|P02817|AMELX_BOVIN Amelogenin, X isoform OS=Bos taurus OX=9913 GN=AMELX PE=1 SV=2	1	hf1_10472_ebo_32_1_261219.ScanId;v=1;d1=8170.8170.2	controllerType=0 controllerNumber=1 scan=8170	21.3969
06966:2	1	F.SM[+15.995]PLPPHPGHPG.Y		M[+16]	620.304	2	1239.6	1239.59	0	5.9	16	Non	179.52	179.52	115.43	1.78	1651	>sp|P02817|AMELX_BOVIN Amelogenin, X isoform OS=Bos taurus OX=9913 GN=AMELX PE=1 SV=2	1	hf1_10472_ebo_32_1_261219.ScanId;v=1;d1=6599.6599.2	controllerType=0 controllerNumber=1 scan=6599	18.7433
19792:3	1	F.SMPLPPHPGHPGYINF.S			587.63	3	1760.87	1760.86	0	9.1	16	Non	217.87	42.06	42.06	0.98	1651	>sp|P02817|AMELX_BOVIN Amelogenin, X isoform OS=Bos taurus OX=9913 GN=AMELX PE=1 SV=2	1	hf1_10472_ebo_32_1_261219.ScanId;v=1;d1=15483.15483.3	controllerType=0 controllerNumber=1 scan=15483	34.1265
23662:3	1	F.SMPLPPHPGHPGYINF.S			587.627	3	1760.87	1760.86	0	4.9	16	Non	240.53	108.22	108.22	2.46	1651	>sp|P02817|AMELX_BOVIN Amelogenin, X isoform OS=Bos taurus OX=9913 GN=AMELX PE=1 SV=2	1	hf1_10472_ebo_32_1_261219.ScanId;v=1;d1=18161.18161.7	controllerType=0 controllerNumber=1 scan=18161	38.7469
19621:2	1	F.SM[+15.995]PLPPHPGHPGYINF.S		M[+16]	888.937	2	1776.87	1776.85	0	7.7	16	Non	284.51	25.37	25.37	2.78	1651	>sp|P02817|AMELX_BOVIN Amelogenin, X isoform OS=Bos taurus OX=9913 GN=AMELX PE=1 SV=2	1	hf1_10472_ebo_32_1_261219.ScanId;v=1;d1=15356.15356.2	controllerType=0 controllerNumber=1 scan=15356	33.9044
20948:3	1	F.SM[+15.995]PLPPHPGHPGYIN[+0.984]F.S		M[+16], N[+1]	593.289	3	1777.85	1777.84	0	8.6	16	Non	213.32	36.68	33.95	0.98	1651	>sp|P02817|AMELX_BOVIN Amelogenin, X isoform OS=Bos taurus OX=9913 GN=AMELX PE=1 SV=2	1	hf1_10472_ebo_32_1_261219.ScanId;v=1;d1=16297.16297.3	controllerType=0 controllerNumber=1 scan=16297	35.531
20665:3	1	F.SM[+15.995]PLPPHPGHPGYIN[+0.984]F.S		M[+16], N[+1]	593.288	3	1777.85	1777.84	0	8.1	16	Non	241.69	106.78	41.34	2.39	1651	>sp|P02817|AMELX_BOVIN Amelogenin, X isoform OS=Bos taurus OX=9913 GN=AMELX PE=1 SV=2	1	hf1_10472_ebo_32_1_261219.ScanId;v=1;d1=16096.16096.3	controllerType=0 controllerNumber=1 scan=16096	35.1874
30129:3	1	F.SMPLPPHPGHPGYINFS[+79.966]YEVLTPLK.W		S[+80]	957.81	3	2871.41	2871.39	0	7.3	16	NRagged	369.62	369.62	108.31	7.09	1651	>sp|P02817|AMELX_BOVIN Amelogenin, X isoform OS=Bos taurus OX=9913 GN=AMELX PE=1 SV=2	1	hf1_10472_ebo_32_1_261219.ScanId;v=1;d1=22441.22441.3	controllerType=0 controllerNumber=1 scan=22441	46.0521
34116:3	1	F.SMPLPPHPGHPGYIN[+0.984]FS[+79.966]YEVLTPLK.W		N[+1], S[+80]	958.129	3	2872.37	2872.38	0	-1.9	16	NRagged	184.05	138.34	51.15	2.31	1651	>sp|P02817|AMELX_BOVIN Amelogenin, X isoform OS=Bos taurus OX=9913 GN=AMELX PE=1 SV=2	1	hf1_10472_ebo_32_1_261219.ScanId;v=1;d1=25048.25048.3	controllerType=0 controllerNumber=1 scan=25048	50.5834
34008:3	1	F.SMPLPPHPGHPGYIN[+0.984]FS[+79.966]YEVLTPLK.W		N[+1], S[+80]	958.127	3	2872.37	2872.38	0	-4	16	NRagged	232.82	232.82	84.03	2.84	1651	>sp|P02817|AMELX_BOVIN Amelogenin, X isoform OS=Bos taurus OX=9913 GN=AMELX PE=1 SV=2	1	hf1_10472_ebo_32_1_261219.ScanId;v=1;d1=24973.24973.3	controllerType=0 controllerNumber=1 scan=24973	50.4538
28457:3	1	F.SM[+15.995]PLPPHPGHPGYINFS[+79.966]YEVLTPLK.W		M[+16], S[+80]	963.14	3	2887.41	2887.39	0	6.2	16	NRagged	622.78	622.78	180.25	10.08	1651	>sp|P02817|AMELX_BOVIN Amelogenin, X isoform OS=Bos taurus OX=9913 GN=AMELX PE=1 SV=2	1	hf1_10472_ebo_32_1_261219.ScanId;v=1;d1=21328.21328.3	controllerType=0 controllerNumber=1 scan=21328	44.141
28226:3	1	F.SM[+15.995]PLPPHPGHPGYINFS[+79.966]YEVLTPLK.W		M[+16], S[+80]	963.142	3	2887.41	2887.39	0	7.8	16	NRagged	641.78	641.78	180.38	9.86	1651	>sp|P02817|AMELX_BOVIN Amelogenin, X isoform OS=Bos taurus OX=9913 GN=AMELX PE=1 SV=2	1	hf1_10472_ebo_32_1_261219.ScanId;v=1;d1=21176.21176.3	controllerType=0 controllerNumber=1 scan=21176	43.8816
29066:3	1	F.SM[+15.995]PLPPHPGHPGYIN[+0.984]FS[+79.966]YEVLTPLK.W		M[+16], N[+1], S[+80]	963.471	3	2888.4	2888.37	0	8.4	16	NRagged	354.28	328.49	178.48	6.21	1651	>sp|P02817|AMELX_BOVIN Amelogenin, X isoform OS=Bos taurus OX=9913 GN=AMELX PE=1 SV=2	1	hf1_10472_ebo_32_1_261219.ScanId;v=1;d1=21735.21735.3	controllerType=0 controllerNumber=1 scan=21735	44.8389
29056:3	1	F.SM[+15.995]PLPPHPGHPGYIN[+0.984]FS[+79.966]YEVLTPLK.W		M[+16], N[+1], S[+80]	963.471	3	2888.4	2888.37	0	8.4	16	NRagged	412.7	399.87	145.27	7.37	1651	>sp|P02817|AMELX_BOVIN Amelogenin, X isoform OS=Bos taurus OX=9913 GN=AMELX PE=1 SV=2	1	hf1_10472_ebo_32_1_261219.ScanId;v=1;d1=21729.21729.3	controllerType=0 controllerNumber=1 scan=21729	44.8305
35044:3	1	F.SM[+15.995]PLPPHPGHPGYINFS[+79.966]YEVLTPLKWY.Q		M[+16], S[+80]	1079.52	3	3236.56	3236.53	0	8.7	16	Non	146.96	67.56	54.57	2.31	1651	>sp|P02817|AMELX_BOVIN Amelogenin, X isoform OS=Bos taurus OX=9913 GN=AMELX PE=1 SV=2	1	hf1_10472_ebo_32_1_261219.ScanId;v=1;d1=25666.25666.3	controllerType=0 controllerNumber=1 scan=25666	51.6709
10812:1	1	S.M[+15.995]PLPP.H		M[+16]	570.299	1	570.299	570.296	0	5.9	17	Non	293.84	22.75	22.75	2.46	1651	>sp|P02817|AMELX_BOVIN Amelogenin, X isoform OS=Bos taurus OX=9913 GN=AMELX PE=1 SV=2	1	hf1_10472_ebo_32_1_261219.ScanId;v=1;d1=9303.9303.2	controllerType=0 controllerNumber=1 scan=9303	23.362
07142:1	1	S.M[+15.995]PLPPH.P		M[+16]	707.358	1	707.358	707.355	0	5.3	17	Non	286.4	277.55	50.92	4.39	1651	>sp|P02817|AMELX_BOVIN Amelogenin, X isoform OS=Bos taurus OX=9913 GN=AMELX PE=1 SV=2	1	hf1_10472_ebo_32_1_261219.ScanId;v=1;d1=6726.6726.2	controllerType=0 controllerNumber=1 scan=6726	18.9631
49348:2	1	S.MPLPPHP.G			394.712	2	788.416	788.412	0	4.9	17	Non	157.06	157.06	157.06	2.34	1651	>sp|P02817|AMELX_BOVIN Amelogenin, X isoform OS=Bos taurus OX=9913 GN=AMELX PE=1 SV=2	1	hf1_10472_ebo_32_1_261219.ScanId;v=1;d1=35877.35877.2	controllerType=0 controllerNumber=1 scan=35877	72.2097
14949:2	1	S.MPLPPHP.G			394.713	2	788.418	788.412	0	7.1	17	Non	245.65	178.57	178.57	3.24	1651	>sp|P02817|AMELX_BOVIN Amelogenin, X isoform OS=Bos taurus OX=9913 GN=AMELX PE=1 SV=2	1	hf1_10472_ebo_32_1_261219.ScanId;v=1;d1=12125.12125.2	controllerType=0 controllerNumber=1 scan=12125	28.3211
15525:1	1	S.MPLPPHP.G			788.416	1	788.416	788.412	0	4.3	17	Non	284.36	200.91	200.91	3.43	1651	>sp|P02817|AMELX_BOVIN Amelogenin, X isoform OS=Bos taurus OX=9913 GN=AMELX PE=1 SV=2	1	hf1_10472_ebo_32_1_261219.ScanId;v=1;d1=12507.12507.2	controllerType=0 controllerNumber=1 scan=12507	28.984
16174:1	1	S.MPLPPHP.G			788.417	1	788.417	788.412	0	6.2	17	Non	306.19	207.3	207.3	4.05	1651	>sp|P02817|AMELX_BOVIN Amelogenin, X isoform OS=Bos taurus OX=9913 GN=AMELX PE=1 SV=2	1	hf1_10472_ebo_32_1_261219.ScanId;v=1;d1=12946.12946.2	controllerType=0 controllerNumber=1 scan=12946	29.7389
17353:2	1	S.MPLPPHP.G			394.712	2	788.417	788.412	0	6.2	17	Non	343.47	198.2	198.2	3.98	1651	>sp|P02817|AMELX_BOVIN Amelogenin, X isoform OS=Bos taurus OX=9913 GN=AMELX PE=1 SV=2	1	hf1_10472_ebo_32_1_261219.ScanId;v=1;d1=13762.13762.2	controllerType=0 controllerNumber=1 scan=13762	31.1398
15949:2	1	S.MPLPPHP.G			394.712	2	788.416	788.412	0	4.7	17	Non	406.73	214.7	214.7	4.62	1651	>sp|P02817|AMELX_BOVIN Amelogenin, X isoform OS=Bos taurus OX=9913 GN=AMELX PE=1 SV=2	1	hf1_10472_ebo_32_1_261219.ScanId;v=1;d1=12796.12796.2	controllerType=0 controllerNumber=1 scan=12796	29.485
15657:2	1	S.MPLPPHP.G			394.712	2	788.416	788.412	0	4.2	17	Non	421.61	220.35	220.35	4.35	1651	>sp|P02817|AMELX_BOVIN Amelogenin, X isoform OS=Bos taurus OX=9913 GN=AMELX PE=1 SV=2	1	hf1_10472_ebo_32_1_261219.ScanId;v=1;d1=12591.12591.2	controllerType=0 controllerNumber=1 scan=12591	29.1315
16668:2	1	S.MPLPPHP.G			394.712	2	788.416	788.412	0	4.5	17	Non	425.35	188.68	188.68	3.73	1651	>sp|P02817|AMELX_BOVIN Amelogenin, X isoform OS=Bos taurus OX=9913 GN=AMELX PE=1 SV=2	1	hf1_10472_ebo_32_1_261219.ScanId;v=1;d1=13279.13279.2	controllerType=0 controllerNumber=1 scan=13279	30.2918
15352:2	1	S.MPLPPHP.G			394.712	2	788.417	788.412	0	5.7	17	Non	426.42	229.74	229.74	4.62	1651	>sp|P02817|AMELX_BOVIN Amelogenin, X isoform OS=Bos taurus OX=9913 GN=AMELX PE=1 SV=2	1	hf1_10472_ebo_32_1_261219.ScanId;v=1;d1=12390.12390.2	controllerType=0 controllerNumber=1 scan=12390	28.7881
48660:2	1	S.M[+15.995]PLPPHP.G		M[+16]	402.709	2	804.411	804.407	0	4.1	17	Non	133.6	133.6	26.44	2.3	1651	>sp|P02817|AMELX_BOVIN Amelogenin, X isoform OS=Bos taurus OX=9913 GN=AMELX PE=1 SV=2	1	hf1_10472_ebo_32_1_261219.ScanId;v=1;d1=35327.35327.2	controllerType=0 controllerNumber=1 scan=35327	70.9721
49258:2	1	S.M[+15.995]PLPPHP.G		M[+16]	402.709	2	804.411	804.407	0	4.5	17	Non	135.55	135.55	21.53	1.59	1651	>sp|P02817|AMELX_BOVIN Amelogenin, X isoform OS=Bos taurus OX=9913 GN=AMELX PE=1 SV=2	1	hf1_10472_ebo_32_1_261219.ScanId;v=1;d1=35802.35802.2	controllerType=0 controllerNumber=1 scan=35802	72.031
00036:2	1	S.M[+15.995]PLPPHP.G		M[+16]	402.71	2	804.413	804.407	0	6.5	17	Non	142.98	142.98	14.22	2.29	1651	>sp|P02817|AMELX_BOVIN Amelogenin, X isoform OS=Bos taurus OX=9913 GN=AMELX PE=1 SV=2	1	hf1_10472_ebo_32_1_261219.ScanId;v=1;d1=117.117.3	controllerType=0 controllerNumber=1 scan=117	0.5668
49063:2	1	S.M[+15.995]PLPPHP.G		M[+16]	402.709	2	804.411	804.407	0	4.8	17	Non	147.45	147.45	24.08	2.34	1651	>sp|P02817|AMELX_BOVIN Amelogenin, X isoform OS=Bos taurus OX=9913 GN=AMELX PE=1 SV=2	1	hf1_10472_ebo_32_1_261219.ScanId;v=1;d1=35649.35649.2	controllerType=0 controllerNumber=1 scan=35649	71.6848
49164:2	1	S.M[+15.995]PLPPHP.G		M[+16]	402.709	2	804.411	804.407	0	4.7	17	Non	150.47	150.47	26.48	2.34	1651	>sp|P02817|AMELX_BOVIN Amelogenin, X isoform OS=Bos taurus OX=9913 GN=AMELX PE=1 SV=2	1	hf1_10472_ebo_32_1_261219.ScanId;v=1;d1=35726.35726.3	controllerType=0 controllerNumber=1 scan=35726	71.8524
47908:2	1	S.M[+15.995]PLPPHP.G		M[+16]	402.709	2	804.411	804.407	0	4.9	17	Non	158.42	158.42	22.38	2.29	1651	>sp|P02817|AMELX_BOVIN Amelogenin, X isoform OS=Bos taurus OX=9913 GN=AMELX PE=1 SV=2	1	hf1_10472_ebo_32_1_261219.ScanId;v=1;d1=34702.34702.2	controllerType=0 controllerNumber=1 scan=34702	69.5991
48096:2	1	S.M[+15.995]PLPPHP.G		M[+16]	402.709	2	804.411	804.407	0	4.9	17	Non	158.63	158.63	65.4	2.29	1651	>sp|P02817|AMELX_BOVIN Amelogenin, X isoform OS=Bos taurus OX=9913 GN=AMELX PE=1 SV=2	1	hf1_10472_ebo_32_1_261219.ScanId;v=1;d1=34858.34858.2	controllerType=0 controllerNumber=1 scan=34858	69.9406
48477:2	1	S.M[+15.995]PLPPHP.G		M[+16]	402.709	2	804.411	804.407	0	4.5	17	Non	163.31	163.31	18.97	2.57	1651	>sp|P02817|AMELX_BOVIN Amelogenin, X isoform OS=Bos taurus OX=9913 GN=AMELX PE=1 SV=2	1	hf1_10472_ebo_32_1_261219.ScanId;v=1;d1=35175.35175.2	controllerType=0 controllerNumber=1 scan=35175	70.6233
11515:2	1	S.MP[+31.990]LPPHP.G		P[+32]	410.707	2	820.407	820.402	0	5.4	17	Non	166.8	166.8	1.8	2.31	1651	>sp|P02817|AMELX_BOVIN Amelogenin, X isoform OS=Bos taurus OX=9913 GN=AMELX PE=1 SV=2	1	hf1_10472_ebo_32_1_261219.ScanId;v=1;d1=9792.9792.3	controllerType=0 controllerNumber=1 scan=9792	24.2387
48849:2	1	S.M[+15.995]PLPPHP.G		M[+16]	402.709	2	804.411	804.407	0	4.8	17	Non	184.28	164.31	37.21	2.74	1651	>sp|P02817|AMELX_BOVIN Amelogenin, X isoform OS=Bos taurus OX=9913 GN=AMELX PE=1 SV=2	1	hf1_10472_ebo_32_1_261219.ScanId;v=1;d1=35480.35480.2	controllerType=0 controllerNumber=1 scan=35480	71.328
47722:2	1	S.M[+15.995]PLPPHP.G		M[+16]	402.709	2	804.411	804.407	0	4.5	17	Non	186.91	186.91	34.1	2.57	1651	>sp|P02817|AMELX_BOVIN Amelogenin, X isoform OS=Bos taurus OX=9913 GN=AMELX PE=1 SV=2	1	hf1_10472_ebo_32_1_261219.ScanId;v=1;d1=34551.34551.2	controllerType=0 controllerNumber=1 scan=34551	69.251
49557:2	1	S.M[+15.995]PLPPHP.G		M[+16]	402.709	2	804.411	804.407	0	4.7	17	Non	192.22	192.22	65.73	2.71	1651	>sp|P02817|AMELX_BOVIN Amelogenin, X isoform OS=Bos taurus OX=9913 GN=AMELX PE=1 SV=2	1	hf1_10472_ebo_32_1_261219.ScanId;v=1;d1=36065.36065.2	controllerType=0 controllerNumber=1 scan=36065	72.6668
49732:2	1	S.M[+15.995]PLPPHP.G		M[+16]	402.709	2	804.411	804.407	0	4.9	17	Non	197.41	197.41	65.9	2.71	1651	>sp|P02817|AMELX_BOVIN Amelogenin, X isoform OS=Bos taurus OX=9913 GN=AMELX PE=1 SV=2	1	hf1_10472_ebo_32_1_261219.ScanId;v=1;d1=36208.36208.2	controllerType=0 controllerNumber=1 scan=36208	73.0127
13073:2	1	S.M[+15.995]PLPPHP.G		M[+16]	402.71	2	804.412	804.407	0	6.1	17	Non	203.18	73.85	25.45	0.9	1651	>sp|P02817|AMELX_BOVIN Amelogenin, X isoform OS=Bos taurus OX=9913 GN=AMELX PE=1 SV=2	1	hf1_10472_ebo_32_1_261219.ScanId;v=1;d1=10859.10859.3	controllerType=0 controllerNumber=1 scan=10859	26.0898
13246:2	1	S.M[+31.990]PLPPHP.G		M[+32]	410.707	2	820.406	820.402	0	5.2	17	Non	213	127.82	10.5	1.04	1651	>sp|P02817|AMELX_BOVIN Amelogenin, X isoform OS=Bos taurus OX=9913 GN=AMELX PE=1 SV=2	1	hf1_10472_ebo_32_1_261219.ScanId;v=1;d1=10978.10978.2	controllerType=0 controllerNumber=1 scan=10978	26.3033
48288:2	1	S.M[+15.995]PLPPHP.G		M[+16]	402.709	2	804.411	804.407	0	4.6	17	Non	222.37	214.06	62.16	2.8	1651	>sp|P02817|AMELX_BOVIN Amelogenin, X isoform OS=Bos taurus OX=9913 GN=AMELX PE=1 SV=2	1	hf1_10472_ebo_32_1_261219.ScanId;v=1;d1=35023.35023.2	controllerType=0 controllerNumber=1 scan=35023	70.2842
13475:2	1	S.M[+15.995]PLPPHP.G		M[+16]	402.709	2	804.412	804.407	0	5.5	17	Non	262.45	112.31	26.04	1.84	1651	>sp|P02817|AMELX_BOVIN Amelogenin, X isoform OS=Bos taurus OX=9913 GN=AMELX PE=1 SV=2	1	hf1_10472_ebo_32_1_261219.ScanId;v=1;d1=11128.11128.2	controllerType=0 controllerNumber=1 scan=11128	26.5662
10456:1	1	S.M[+15.995]PLPPHP.G		M[+16]	804.412	1	804.412	804.407	0	5.3	17	Non	276.98	220.04	42.38	4	1651	>sp|P02817|AMELX_BOVIN Amelogenin, X isoform OS=Bos taurus OX=9913 GN=AMELX PE=1 SV=2	1	hf1_10472_ebo_32_1_261219.ScanId;v=1;d1=9069.9069.2	controllerType=0 controllerNumber=1 scan=9069	22.9569
12818:2	1	S.M[+31.990]PLPPHP.G		M[+32]	410.707	2	820.406	820.402	0	4.7	17	Non	294.98	159.81	12.18	2.98	1651	>sp|P02817|AMELX_BOVIN Amelogenin, X isoform OS=Bos taurus OX=9913 GN=AMELX PE=1 SV=2	1	hf1_10472_ebo_32_1_261219.ScanId;v=1;d1=10687.10687.2	controllerType=0 controllerNumber=1 scan=10687	25.7895
13169:2	1	S.M[+15.995]PLPPHP.G		M[+16]	402.709	2	804.412	804.407	0	5.6	17	Non	298.69	167.05	37.66	3.49	1651	>sp|P02817|AMELX_BOVIN Amelogenin, X isoform OS=Bos taurus OX=9913 GN=AMELX PE=1 SV=2	1	hf1_10472_ebo_32_1_261219.ScanId;v=1;d1=10927.10927.2	controllerType=0 controllerNumber=1 scan=10927	26.2124
12527:2	1	S.M[+31.990]PLPPHP.G		M[+32]	410.707	2	820.408	820.402	0	6.4	17	Non	315.72	210.42	33.29	4.22	1651	>sp|P02817|AMELX_BOVIN Amelogenin, X isoform OS=Bos taurus OX=9913 GN=AMELX PE=1 SV=2	1	hf1_10472_ebo_32_1_261219.ScanId;v=1;d1=10494.10494.2	controllerType=0 controllerNumber=1 scan=10494	25.4523
12234:2	1	S.M[+31.990]PLPPHP.G		M[+32]	410.707	2	820.407	820.402	0	6.1	17	Non	337.48	198.62	12.52	4.02	1651	>sp|P02817|AMELX_BOVIN Amelogenin, X isoform OS=Bos taurus OX=9913 GN=AMELX PE=1 SV=2	1	hf1_10472_ebo_32_1_261219.ScanId;v=1;d1=10292.10292.2	controllerType=0 controllerNumber=1 scan=10292	25.0986
09358:2	1	S.M[+15.995]PLPPHP.G		M[+16]	402.709	2	804.411	804.407	0	4.6	17	Non	344.98	168.25	70.82	3.71	1651	>sp|P02817|AMELX_BOVIN Amelogenin, X isoform OS=Bos taurus OX=9913 GN=AMELX PE=1 SV=2	1	hf1_10472_ebo_32_1_261219.ScanId;v=1;d1=8278.8278.2	controllerType=0 controllerNumber=1 scan=8278	21.5846
12801:2	1	S.M[+15.995]PLPPHP.G		M[+16]	402.709	2	804.412	804.407	0	5.4	17	Non	352.91	176.35	40.51	4.02	1651	>sp|P02817|AMELX_BOVIN Amelogenin, X isoform OS=Bos taurus OX=9913 GN=AMELX PE=1 SV=2	1	hf1_10472_ebo_32_1_261219.ScanId;v=1;d1=10676.10676.2	controllerType=0 controllerNumber=1 scan=10676	25.7702
11946:2	1	S.M[+31.990]PLPPHP.G		M[+32]	410.707	2	820.406	820.402	0	4.4	17	Non	391.82	263.58	41.68	4.02	1651	>sp|P02817|AMELX_BOVIN Amelogenin, X isoform OS=Bos taurus OX=9913 GN=AMELX PE=1 SV=2	1	hf1_10472_ebo_32_1_261219.ScanId;v=1;d1=10093.10093.2	controllerType=0 controllerNumber=1 scan=10093	24.7531
11915:2	1	S.M[+15.995]PLPPHP.G		M[+16]	402.709	2	804.412	804.407	0	5.2	17	Non	415.9	245.26	81.87	4.31	1651	>sp|P02817|AMELX_BOVIN Amelogenin, X isoform OS=Bos taurus OX=9913 GN=AMELX PE=1 SV=2	1	hf1_10472_ebo_32_1_261219.ScanId;v=1;d1=10072.10072.2	controllerType=0 controllerNumber=1 scan=10072	24.7188
12206:2	1	S.M[+15.995]PLPPHP.G		M[+16]	402.709	2	804.412	804.407	0	5.2	17	Non	416.15	217	83.16	4.4	1651	>sp|P02817|AMELX_BOVIN Amelogenin, X isoform OS=Bos taurus OX=9913 GN=AMELX PE=1 SV=2	1	hf1_10472_ebo_32_1_261219.ScanId;v=1;d1=10274.10274.2	controllerType=0 controllerNumber=1 scan=10274	25.0674
12496:2	1	S.M[+15.995]PLPPHP.G		M[+16]	402.71	2	804.412	804.407	0	5.9	17	Non	421.96	251.87	89.37	4.35	1651	>sp|P02817|AMELX_BOVIN Amelogenin, X isoform OS=Bos taurus OX=9913 GN=AMELX PE=1 SV=2	1	hf1_10472_ebo_32_1_261219.ScanId;v=1;d1=10474.10474.2	controllerType=0 controllerNumber=1 scan=10474	25.419
09912:2	1	S.M[+15.995]PLPPHP.G		M[+16]	402.709	2	804.412	804.407	0	5.5	17	Non	442.33	264.24	90.06	4.69	1651	>sp|P02817|AMELX_BOVIN Amelogenin, X isoform OS=Bos taurus OX=9913 GN=AMELX PE=1 SV=2	1	hf1_10472_ebo_32_1_261219.ScanId;v=1;d1=8680.8680.2	controllerType=0 controllerNumber=1 scan=8680	22.2826
11060:2	1	S.M[+15.995]PLPPHP.G		M[+16]	402.709	2	804.411	804.407	0	4.9	17	Non	446.24	270.62	94.76	4.63	1651	>sp|P02817|AMELX_BOVIN Amelogenin, X isoform OS=Bos taurus OX=9913 GN=AMELX PE=1 SV=2	1	hf1_10472_ebo_32_1_261219.ScanId;v=1;d1=9470.9470.2	controllerType=0 controllerNumber=1 scan=9470	23.6584
10191:2	1	S.M[+15.995]PLPPHP.G		M[+16]	402.71	2	804.412	804.407	0	5.8	17	Non	450.21	275.35	96.84	4.37	1651	>sp|P02817|AMELX_BOVIN Amelogenin, X isoform OS=Bos taurus OX=9913 GN=AMELX PE=1 SV=2	1	hf1_10472_ebo_32_1_261219.ScanId;v=1;d1=8876.8876.2	controllerType=0 controllerNumber=1 scan=8876	22.6199
10464:2	1	S.M[+15.995]PLPPHP.G		M[+16]	402.71	2	804.412	804.407	0	6	17	Non	454.05	281.13	97.77	4.9	1651	>sp|P02817|AMELX_BOVIN Amelogenin, X isoform OS=Bos taurus OX=9913 GN=AMELX PE=1 SV=2	1	hf1_10472_ebo_32_1_261219.ScanId;v=1;d1=9075.9075.2	controllerType=0 controllerNumber=1 scan=9075	22.9687
09625:2	1	S.M[+15.995]PLPPHP.G		M[+16]	402.709	2	804.411	804.407	0	5.1	17	Non	460.63	265.15	109.65	4.63	1651	>sp|P02817|AMELX_BOVIN Amelogenin, X isoform OS=Bos taurus OX=9913 GN=AMELX PE=1 SV=2	1	hf1_10472_ebo_32_1_261219.ScanId;v=1;d1=8479.8479.2	controllerType=0 controllerNumber=1 scan=8479	21.9411
10756:2	1	S.M[+15.995]PLPPHP.G		M[+16]	402.71	2	804.412	804.407	0	6.4	17	Non	461.03	265.84	96.52	4.63	1651	>sp|P02817|AMELX_BOVIN Amelogenin, X isoform OS=Bos taurus OX=9913 GN=AMELX PE=1 SV=2	1	hf1_10472_ebo_32_1_261219.ScanId;v=1;d1=9268.9268.2	controllerType=0 controllerNumber=1 scan=9268	23.3043
06858:2	1	S.M[+15.995]PLPP[+15.995]HP.G		M[+16], P[+16]	410.707	2	820.406	820.402	0	4.9	17	Non	172.06	168.02	10.2	2.31	1651	>sp|P02817|AMELX_BOVIN Amelogenin, X isoform OS=Bos taurus OX=9913 GN=AMELX PE=1 SV=2	1	hf1_10472_ebo_32_1_261219.ScanId;v=1;d1=6523.6523.2	controllerType=0 controllerNumber=1 scan=6523	18.6101
07833:2	1	S.M[+15.995]PLPPHP[+15.995].G		M[+16], P[+16]	410.707	2	820.407	820.402	0	5.6	17	Non	241.17	175.45	31.33	2.78	1651	>sp|P02817|AMELX_BOVIN Amelogenin, X isoform OS=Bos taurus OX=9913 GN=AMELX PE=1 SV=2	1	hf1_10472_ebo_32_1_261219.ScanId;v=1;d1=7218.7218.2	controllerType=0 controllerNumber=1 scan=7218	19.7985
50351:2	1	S.MPLPPHPG.H			423.222	2	845.437	845.434	0	4.2	17	Non	201.49	201.49	201.49	2.77	1651	>sp|P02817|AMELX_BOVIN Amelogenin, X isoform OS=Bos taurus OX=9913 GN=AMELX PE=1 SV=2	1	hf1_10472_ebo_32_1_261219.ScanId;v=1;d1=37217.37217.2	controllerType=0 controllerNumber=1 scan=37217	77.394
00563:2	1	S.MPLPPHPG.H			423.222	2	845.437	845.434	0	3.2	17	Non	205.66	205.66	205.66	2.8	1651	>sp|P02817|AMELX_BOVIN Amelogenin, X isoform OS=Bos taurus OX=9913 GN=AMELX PE=1 SV=2	1	hf1_10472_ebo_32_1_261219.ScanId;v=1;d1=2012.2012.2	controllerType=0 controllerNumber=1 scan=2012	10.7223
01661:2	1	S.MPLPPHPG.H			423.223	2	845.438	845.434	0	4.6	17	Non	216.82	216.82	216.82	2.56	1651	>sp|P02817|AMELX_BOVIN Amelogenin, X isoform OS=Bos taurus OX=9913 GN=AMELX PE=1 SV=2	1	hf1_10472_ebo_32_1_261219.ScanId;v=1;d1=2860.2860.4	controllerType=0 controllerNumber=1 scan=2860	12.6165
50384:2	1	S.MPLPPHPG.H			423.222	2	845.437	845.434	0	3.9	17	Non	233.91	233.91	233.91	2.77	1651	>sp|P02817|AMELX_BOVIN Amelogenin, X isoform OS=Bos taurus OX=9913 GN=AMELX PE=1 SV=2	1	hf1_10472_ebo_32_1_261219.ScanId;v=1;d1=37287.37287.2	controllerType=0 controllerNumber=1 scan=37287	77.7364
50323:2	1	S.MPLPPHPG.H			423.222	2	845.437	845.434	0	3.9	17	Non	241.12	241.12	241.12	3.8	1651	>sp|P02817|AMELX_BOVIN Amelogenin, X isoform OS=Bos taurus OX=9913 GN=AMELX PE=1 SV=2	1	hf1_10472_ebo_32_1_261219.ScanId;v=1;d1=37150.37150.2	controllerType=0 controllerNumber=1 scan=37150	77.0528
50250:2	1	S.MPLPPHPG.H			423.222	2	845.437	845.434	0	3.3	17	Non	253.28	253.28	253.28	4.06	1651	>sp|P02817|AMELX_BOVIN Amelogenin, X isoform OS=Bos taurus OX=9913 GN=AMELX PE=1 SV=2	1	hf1_10472_ebo_32_1_261219.ScanId;v=1;d1=37004.37004.2	controllerType=0 controllerNumber=1 scan=37004	76.3736
17617:2	1	S.MPLPPHPG.H			423.223	2	845.438	845.434	0	4.9	17	Non	272.35	237.75	237.75	3.79	1651	>sp|P02817|AMELX_BOVIN Amelogenin, X isoform OS=Bos taurus OX=9913 GN=AMELX PE=1 SV=2	1	hf1_10472_ebo_32_1_261219.ScanId;v=1;d1=13937.13937.2	controllerType=0 controllerNumber=1 scan=13937	31.4352
47027:2	1	S.MPLPPHPG.H			423.223	2	845.438	845.434	0	4.6	17	Non	274.41	274.41	274.41	3.85	1651	>sp|P02817|AMELX_BOVIN Amelogenin, X isoform OS=Bos taurus OX=9913 GN=AMELX PE=1 SV=2	1	hf1_10472_ebo_32_1_261219.ScanId;v=1;d1=33947.33947.2	controllerType=0 controllerNumber=1 scan=33947	67.8758
50286:2	1	S.MPLPPHPG.H			423.222	2	845.437	845.434	0	3.6	17	Non	277.69	277.69	277.69	3.8	1651	>sp|P02817|AMELX_BOVIN Amelogenin, X isoform OS=Bos taurus OX=9913 GN=AMELX PE=1 SV=2	1	hf1_10472_ebo_32_1_261219.ScanId;v=1;d1=37076.37076.2	controllerType=0 controllerNumber=1 scan=37076	76.7124
00808:2	1	S.MPLPPHPG.H			423.222	2	845.436	845.434	0	2.6	17	Non	288.67	288.67	288.67	4.07	1651	>sp|P02817|AMELX_BOVIN Amelogenin, X isoform OS=Bos taurus OX=9913 GN=AMELX PE=1 SV=2	1	hf1_10472_ebo_32_1_261219.ScanId;v=1;d1=2244.2244.2	controllerType=0 controllerNumber=1 scan=2244	11.4094
16478:2	1	S.MPLPPHPG.H			423.222	2	845.436	845.434	0	2.9	17	Non	289.28	289.28	289.28	3.73	1651	>sp|P02817|AMELX_BOVIN Amelogenin, X isoform OS=Bos taurus OX=9913 GN=AMELX PE=1 SV=2	1	hf1_10472_ebo_32_1_261219.ScanId;v=1;d1=13150.13150.2	controllerType=0 controllerNumber=1 scan=13150	30.0638
16629:2	1	S.MPLPPHPG.H			423.222	2	845.436	845.434	0	3.1	17	Non	294.69	270.63	270.63	3.9	1651	>sp|P02817|AMELX_BOVIN Amelogenin, X isoform OS=Bos taurus OX=9913 GN=AMELX PE=1 SV=2	1	hf1_10472_ebo_32_1_261219.ScanId;v=1;d1=13251.13251.2	controllerType=0 controllerNumber=1 scan=13251	30.2435
00682:2	1	S.MPLPPHPG.H			423.222	2	845.436	845.434	0	3.1	17	Non	295.1	295.1	295.1	4.33	1651	>sp|P02817|AMELX_BOVIN Amelogenin, X isoform OS=Bos taurus OX=9913 GN=AMELX PE=1 SV=2	1	hf1_10472_ebo_32_1_261219.ScanId;v=1;d1=2125.2125.2	controllerType=0 controllerNumber=1 scan=2125	11.0604
01029:2	1	S.MPLPPHPG.H			423.221	2	845.436	845.434	0	2.3	17	Non	304.25	304.25	304.25	3.62	1651	>sp|P02817|AMELX_BOVIN Amelogenin, X isoform OS=Bos taurus OX=9913 GN=AMELX PE=1 SV=2	1	hf1_10472_ebo_32_1_261219.ScanId;v=1;d1=2399.2399.2	controllerType=0 controllerNumber=1 scan=2399	11.7475
13873:2	1	S.MPLPPHPG.H			423.222	2	845.437	845.434	0	3.6	17	Non	311.64	266.89	266.89	3.53	1651	>sp|P02817|AMELX_BOVIN Amelogenin, X isoform OS=Bos taurus OX=9913 GN=AMELX PE=1 SV=2	1	hf1_10472_ebo_32_1_261219.ScanId;v=1;d1=11392.11392.2	controllerType=0 controllerNumber=1 scan=11392	27.0195
49336:2	1	S.MPLPPHPG.H			423.222	2	845.438	845.434	0	4.4	17	Non	312.82	312.82	312.82	4.07	1651	>sp|P02817|AMELX_BOVIN Amelogenin, X isoform OS=Bos taurus OX=9913 GN=AMELX PE=1 SV=2	1	hf1_10472_ebo_32_1_261219.ScanId;v=1;d1=35868.35868.2	controllerType=0 controllerNumber=1 scan=35868	72.1936
49157:2	1	S.MPLPPHPG.H			423.223	2	845.438	845.434	0	4.6	17	Non	313.98	313.98	313.98	4.07	1651	>sp|P02817|AMELX_BOVIN Amelogenin, X isoform OS=Bos taurus OX=9913 GN=AMELX PE=1 SV=2	1	hf1_10472_ebo_32_1_261219.ScanId;v=1;d1=35722.35722.2	controllerType=0 controllerNumber=1 scan=35722	71.8465
48592:2	1	S.MPLPPHPG.H			423.222	2	845.437	845.434	0	4	17	Non	318.04	318.04	318.04	4.07	1651	>sp|P02817|AMELX_BOVIN Amelogenin, X isoform OS=Bos taurus OX=9913 GN=AMELX PE=1 SV=2	1	hf1_10472_ebo_32_1_261219.ScanId;v=1;d1=35269.35269.2	controllerType=0 controllerNumber=1 scan=35269	70.8284
48214:2	1	S.MPLPPHPG.H			423.223	2	845.438	845.434	0	4.8	17	Non	323	323	323	4.89	1651	>sp|P02817|AMELX_BOVIN Amelogenin, X isoform OS=Bos taurus OX=9913 GN=AMELX PE=1 SV=2	1	hf1_10472_ebo_32_1_261219.ScanId;v=1;d1=34953.34953.2	controllerType=0 controllerNumber=1 scan=34953	70.1381
47182:2	1	S.MPLPPHPG.H			423.223	2	845.438	845.434	0	4.6	17	Non	323.62	323.62	323.62	4.61	1651	>sp|P02817|AMELX_BOVIN Amelogenin, X isoform OS=Bos taurus OX=9913 GN=AMELX PE=1 SV=2	1	hf1_10472_ebo_32_1_261219.ScanId;v=1;d1=34098.34098.2	controllerType=0 controllerNumber=1 scan=34098	68.2641
00035:2	1	S.MPLPPHPG.H			423.223	2	845.439	845.434	0	6.1	17	Non	324.23	320.03	320.03	4.55	1651	>sp|P02817|AMELX_BOVIN Amelogenin, X isoform OS=Bos taurus OX=9913 GN=AMELX PE=1 SV=2	1	hf1_10472_ebo_32_1_261219.ScanId;v=1;d1=116.116.2	controllerType=0 controllerNumber=1 scan=116	0.5653
48408:2	1	S.MPLPPHPG.H			423.222	2	845.438	845.434	0	4.5	17	Non	329.28	329.28	329.28	4.61	1651	>sp|P02817|AMELX_BOVIN Amelogenin, X isoform OS=Bos taurus OX=9913 GN=AMELX PE=1 SV=2	1	hf1_10472_ebo_32_1_261219.ScanId;v=1;d1=35115.35115.2	controllerType=0 controllerNumber=1 scan=35115	70.4869
48768:2	1	S.MPLPPHPG.H			423.222	2	845.437	845.434	0	3.7	17	Non	335.36	335.36	335.36	4.39	1651	>sp|P02817|AMELX_BOVIN Amelogenin, X isoform OS=Bos taurus OX=9913 GN=AMELX PE=1 SV=2	1	hf1_10472_ebo_32_1_261219.ScanId;v=1;d1=35413.35413.2	controllerType=0 controllerNumber=1 scan=35413	71.1683
01276:2	1	S.MPLPPHPG.H			423.222	2	845.436	845.434	0	3	17	Non	354.02	354.02	354.02	4.67	1651	>sp|P02817|AMELX_BOVIN Amelogenin, X isoform OS=Bos taurus OX=9913 GN=AMELX PE=1 SV=2	1	hf1_10472_ebo_32_1_261219.ScanId;v=1;d1=2581.2581.2	controllerType=0 controllerNumber=1 scan=2581	12.1021
48964:2	1	S.MPLPPHPG.H			423.223	2	845.438	845.434	0	4.7	17	Non	367.02	367.02	367.02	5.76	1651	>sp|P02817|AMELX_BOVIN Amelogenin, X isoform OS=Bos taurus OX=9913 GN=AMELX PE=1 SV=2	1	hf1_10472_ebo_32_1_261219.ScanId;v=1;d1=35565.35565.2	controllerType=0 controllerNumber=1 scan=35565	71.507
47408:2	1	S.MPLPPHPG.H			423.222	2	845.438	845.434	0	4.4	17	Non	368.14	342.05	342.05	4.61	1651	>sp|P02817|AMELX_BOVIN Amelogenin, X isoform OS=Bos taurus OX=9913 GN=AMELX PE=1 SV=2	1	hf1_10472_ebo_32_1_261219.ScanId;v=1;d1=34289.34289.2	controllerType=0 controllerNumber=1 scan=34289	68.6922
14161:1	1	S.MPLPPHPG.H			845.438	1	845.438	845.434	0	4.8	17	Non	396.71	329.45	329.45	4.83	1651	>sp|P02817|AMELX_BOVIN Amelogenin, X isoform OS=Bos taurus OX=9913 GN=AMELX PE=1 SV=2	1	hf1_10472_ebo_32_1_261219.ScanId;v=1;d1=11598.11598.2	controllerType=0 controllerNumber=1 scan=11598	27.3921
16217:2	1	S.MPLPPHPG.H			423.222	2	845.437	845.434	0	4.3	17	Non	397.4	350.5	350.5	4.34	1651	>sp|P02817|AMELX_BOVIN Amelogenin, X isoform OS=Bos taurus OX=9913 GN=AMELX PE=1 SV=2	1	hf1_10472_ebo_32_1_261219.ScanId;v=1;d1=12975.12975.2	controllerType=0 controllerNumber=1 scan=12975	29.7894
14717:2	1	S.MPLPPHPG.H			423.223	2	845.439	845.434	0	5.8	17	Non	399.72	399.72	399.72	6.28	1651	>sp|P02817|AMELX_BOVIN Amelogenin, X isoform OS=Bos taurus OX=9913 GN=AMELX PE=1 SV=2	1	hf1_10472_ebo_32_1_261219.ScanId;v=1;d1=11977.11977.2	controllerType=0 controllerNumber=1 scan=11977	28.0685
15919:2	1	S.MPLPPHPG.H			423.222	2	845.437	845.434	0	4	17	Non	405.4	349.9	349.9	4.63	1651	>sp|P02817|AMELX_BOVIN Amelogenin, X isoform OS=Bos taurus OX=9913 GN=AMELX PE=1 SV=2	1	hf1_10472_ebo_32_1_261219.ScanId;v=1;d1=12774.12774.2	controllerType=0 controllerNumber=1 scan=12774	29.4472
14145:2	1	S.MPLPPHPG.H			423.223	2	845.438	845.434	0	5.3	17	Non	408.32	392.94	392.94	5.84	1651	>sp|P02817|AMELX_BOVIN Amelogenin, X isoform OS=Bos taurus OX=9913 GN=AMELX PE=1 SV=2	1	hf1_10472_ebo_32_1_261219.ScanId;v=1;d1=11587.11587.2	controllerType=0 controllerNumber=1 scan=11587	27.3736
14426:2	1	S.MPLPPHPG.H			423.223	2	845.439	845.434	0	5.6	17	Non	412.9	389.01	389.01	5.84	1651	>sp|P02817|AMELX_BOVIN Amelogenin, X isoform OS=Bos taurus OX=9913 GN=AMELX PE=1 SV=2	1	hf1_10472_ebo_32_1_261219.ScanId;v=1;d1=11779.11779.2	controllerType=0 controllerNumber=1 scan=11779	27.7164
15317:2	1	S.MPLPPHPG.H			423.223	2	845.438	845.434	0	5.6	17	Non	418.6	341.82	341.82	4.96	1651	>sp|P02817|AMELX_BOVIN Amelogenin, X isoform OS=Bos taurus OX=9913 GN=AMELX PE=1 SV=2	1	hf1_10472_ebo_32_1_261219.ScanId;v=1;d1=12368.12368.2	controllerType=0 controllerNumber=1 scan=12368	28.7505
15018:2	1	S.MPLPPHPG.H			423.224	2	845.44	845.434	0	6.9	17	Non	421.13	354.53	354.53	4.96	1651	>sp|P02817|AMELX_BOVIN Amelogenin, X isoform OS=Bos taurus OX=9913 GN=AMELX PE=1 SV=2	1	hf1_10472_ebo_32_1_261219.ScanId;v=1;d1=12171.12171.2	controllerType=0 controllerNumber=1 scan=12171	28.4065
15629:2	1	S.MPLPPHPG.H			423.222	2	845.437	845.434	0	4.1	17	Non	429.87	349.18	349.18	4.63	1651	>sp|P02817|AMELX_BOVIN Amelogenin, X isoform OS=Bos taurus OX=9913 GN=AMELX PE=1 SV=2	1	hf1_10472_ebo_32_1_261219.ScanId;v=1;d1=12571.12571.2	controllerType=0 controllerNumber=1 scan=12571	29.0967
50202:2	1	S.M[+15.995]PLPPHPG.H		M[+16]	431.22	2	861.432	861.429	0	3.7	17	Non	126.42	126.42	32.5	2.3	1651	>sp|P02817|AMELX_BOVIN Amelogenin, X isoform OS=Bos taurus OX=9913 GN=AMELX PE=1 SV=2	1	hf1_10472_ebo_32_1_261219.ScanId;v=1;d1=36907.36907.2	controllerType=0 controllerNumber=1 scan=36907	75.9072
50270:2	1	S.M[+15.995]PLPPHPG.H		M[+16]	431.22	2	861.432	861.429	0	3.8	17	Non	172.23	172.23	61.39	2.55	1651	>sp|P02817|AMELX_BOVIN Amelogenin, X isoform OS=Bos taurus OX=9913 GN=AMELX PE=1 SV=2	1	hf1_10472_ebo_32_1_261219.ScanId;v=1;d1=37049.37049.2	controllerType=0 controllerNumber=1 scan=37049	76.5921
50372:2	1	S.M[+15.995]PLPPHPG.H		M[+16]	431.22	2	861.432	861.429	0	4.3	17	Non	199.35	199.35	59.66	2.7	1651	>sp|P02817|AMELX_BOVIN Amelogenin, X isoform OS=Bos taurus OX=9913 GN=AMELX PE=1 SV=2	1	hf1_10472_ebo_32_1_261219.ScanId;v=1;d1=37260.37260.2	controllerType=0 controllerNumber=1 scan=37260	77.6018
50337:2	1	S.M[+15.995]PLPPHPG.H		M[+16]	431.22	2	861.432	861.429	0	4.3	17	Non	205.58	205.58	66.25	2.97	1651	>sp|P02817|AMELX_BOVIN Amelogenin, X isoform OS=Bos taurus OX=9913 GN=AMELX PE=1 SV=2	1	hf1_10472_ebo_32_1_261219.ScanId;v=1;d1=37191.37191.2	controllerType=0 controllerNumber=1 scan=37191	77.2672
50400:2	1	S.M[+15.995]PLPPHPG.H		M[+16]	431.22	2	861.432	861.429	0	4.1	17	Non	212.96	212.96	65.67	2.97	1651	>sp|P02817|AMELX_BOVIN Amelogenin, X isoform OS=Bos taurus OX=9913 GN=AMELX PE=1 SV=2	1	hf1_10472_ebo_32_1_261219.ScanId;v=1;d1=37326.37326.2	controllerType=0 controllerNumber=1 scan=37326	77.9382
12039:2	1	S.M[+31.990]PLPPHPG.H		M[+32]	439.216	2	877.426	877.424	0	2.4	17	Non	224.43	140.45	7.96	1.59	1651	>sp|P02817|AMELX_BOVIN Amelogenin, X isoform OS=Bos taurus OX=9913 GN=AMELX PE=1 SV=2	1	hf1_10472_ebo_32_1_261219.ScanId;v=1;d1=10153.10153.2	controllerType=0 controllerNumber=1 scan=10153	24.8537
12635:2	1	S.MPLPP[+31.990]HPG.H		P[+32]	439.217	2	877.427	877.424	0	3.7	17	Non	228.29	228.29	0.29	2.32	1651	>sp|P02817|AMELX_BOVIN Amelogenin, X isoform OS=Bos taurus OX=9913 GN=AMELX PE=1 SV=2	1	hf1_10472_ebo_32_1_261219.ScanId;v=1;d1=10566.10566.3	controllerType=0 controllerNumber=1 scan=10566	25.5787
50309:2	1	S.M[+15.995]PLPPHPG.H		M[+16]	431.22	2	861.433	861.429	0	4.4	17	Non	229.52	229.52	42.39	2.97	1651	>sp|P02817|AMELX_BOVIN Amelogenin, X isoform OS=Bos taurus OX=9913 GN=AMELX PE=1 SV=2	1	hf1_10472_ebo_32_1_261219.ScanId;v=1;d1=37123.37123.2	controllerType=0 controllerNumber=1 scan=37123	76.9282
00011:2	1	S.M[+15.995]PLPPHPG.H		M[+16]	431.221	2	861.434	861.429	0	6	17	Non	240.22	240.22	57.05	4.12	1651	>sp|P02817|AMELX_BOVIN Amelogenin, X isoform OS=Bos taurus OX=9913 GN=AMELX PE=1 SV=2	1	hf1_10472_ebo_32_1_261219.ScanId;v=1;d1=101.101.2	controllerType=0 controllerNumber=1 scan=101	0.5372
49578:2	1	S.M[+15.995]PLPPHPG.H		M[+16]	431.22	2	861.433	861.429	0	4.8	17	Non	251.25	251.25	68.14	4.39	1651	>sp|P02817|AMELX_BOVIN Amelogenin, X isoform OS=Bos taurus OX=9913 GN=AMELX PE=1 SV=2	1	hf1_10472_ebo_32_1_261219.ScanId;v=1;d1=36081.36081.2	controllerType=0 controllerNumber=1 scan=36081	72.7127
50237:2	1	S.M[+15.995]PLPPHPG.H		M[+16]	431.22	2	861.432	861.429	0	3.8	17	Non	253.49	253.49	112.22	4.12	1651	>sp|P02817|AMELX_BOVIN Amelogenin, X isoform OS=Bos taurus OX=9913 GN=AMELX PE=1 SV=2	1	hf1_10472_ebo_32_1_261219.ScanId;v=1;d1=36979.36979.2	controllerType=0 controllerNumber=1 scan=36979	76.2518
47114:2	1	S.M[+15.995]PLPPHPG.H		M[+16]	431.22	2	861.433	861.429	0	5	17	Non	264.52	264.52	70.24	4.39	1651	>sp|P02817|AMELX_BOVIN Amelogenin, X isoform OS=Bos taurus OX=9913 GN=AMELX PE=1 SV=2	1	hf1_10472_ebo_32_1_261219.ScanId;v=1;d1=34039.34039.2	controllerType=0 controllerNumber=1 scan=34039	68.1182
00676:2	1	S.M[+15.995]PLPPHPG.H		M[+16]	431.219	2	861.431	861.429	0	3	17	Non	265.04	265.04	78.81	4.12	1651	>sp|P02817|AMELX_BOVIN Amelogenin, X isoform OS=Bos taurus OX=9913 GN=AMELX PE=1 SV=2	1	hf1_10472_ebo_32_1_261219.ScanId;v=1;d1=2119.2119.2	controllerType=0 controllerNumber=1 scan=2119	11.0484
49643:2	1	S.M[+15.995]PLPPHPG.H		M[+16]	431.22	2	861.433	861.429	0	5.2	17	Non	278.61	278.61	59.14	4.34	1651	>sp|P02817|AMELX_BOVIN Amelogenin, X isoform OS=Bos taurus OX=9913 GN=AMELX PE=1 SV=2	1	hf1_10472_ebo_32_1_261219.ScanId;v=1;d1=36134.36134.2	controllerType=0 controllerNumber=1 scan=36134	72.8414
01071:2	1	S.M[+15.995]PLPPHPG.H		M[+16]	431.219	2	861.431	861.429	0	2.6	17	Non	278.88	278.88	65.78	4.12	1651	>sp|P02817|AMELX_BOVIN Amelogenin, X isoform OS=Bos taurus OX=9913 GN=AMELX PE=1 SV=2	1	hf1_10472_ebo_32_1_261219.ScanId;v=1;d1=2432.2432.2	controllerType=0 controllerNumber=1 scan=2432	11.814
00801:2	1	S.M[+15.995]PLPPHPG.H		M[+16]	431.219	2	861.432	861.429	0	3.2	17	Non	279.42	279.42	103.3	4.12	1651	>sp|P02817|AMELX_BOVIN Amelogenin, X isoform OS=Bos taurus OX=9913 GN=AMELX PE=1 SV=2	1	hf1_10472_ebo_32_1_261219.ScanId;v=1;d1=2239.2239.2	controllerType=0 controllerNumber=1 scan=2239	11.399
49801:2	1	S.M[+15.995]PLPPHPG.H		M[+16]	431.22	2	861.433	861.429	0	5.3	17	Non	281.95	281.95	70.4	5.12	1651	>sp|P02817|AMELX_BOVIN Amelogenin, X isoform OS=Bos taurus OX=9913 GN=AMELX PE=1 SV=2	1	hf1_10472_ebo_32_1_261219.ScanId;v=1;d1=36271.36271.2	controllerType=0 controllerNumber=1 scan=36271	73.1823
12330:2	1	S.M[+31.990]PLPPHPG.H		M[+32]	439.217	2	877.427	877.424	0	4.2	17	Non	296.32	179.03	31.65	3.24	1651	>sp|P02817|AMELX_BOVIN Amelogenin, X isoform OS=Bos taurus OX=9913 GN=AMELX PE=1 SV=2	1	hf1_10472_ebo_32_1_261219.ScanId;v=1;d1=10364.10364.2	controllerType=0 controllerNumber=1 scan=10364	25.2277
48676:2	1	S.M[+15.995]PLPPHPG.H		M[+16]	431.22	2	861.433	861.429	0	5	17	Non	297.81	297.81	68.5	4.66	1651	>sp|P02817|AMELX_BOVIN Amelogenin, X isoform OS=Bos taurus OX=9913 GN=AMELX PE=1 SV=2	1	hf1_10472_ebo_32_1_261219.ScanId;v=1;d1=35339.35339.2	controllerType=0 controllerNumber=1 scan=35339	70.9984
15024:2	1	S.M[+15.995]PLPPHPG.H		M[+16]	431.221	2	861.434	861.429	0	5.9	17	Non	298.59	277.62	62.06	4.17	1651	>sp|P02817|AMELX_BOVIN Amelogenin, X isoform OS=Bos taurus OX=9913 GN=AMELX PE=1 SV=2	1	hf1_10472_ebo_32_1_261219.ScanId;v=1;d1=12175.12175.2	controllerType=0 controllerNumber=1 scan=12175	28.4125
47783:2	1	S.M[+15.995]PLPPHPG.H		M[+16]	431.22	2	861.433	861.429	0	5.2	17	Non	305.9	305.9	72.17	4.34	1651	>sp|P02817|AMELX_BOVIN Amelogenin, X isoform OS=Bos taurus OX=9913 GN=AMELX PE=1 SV=2	1	hf1_10472_ebo_32_1_261219.ScanId;v=1;d1=34596.34596.2	controllerType=0 controllerNumber=1 scan=34596	69.3559
47689:2	1	S.M[+15.995]PLPPHPG.H		M[+16]	431.22	2	861.433	861.429	0	5.1	17	Non	311.67	311.67	67.6	5.12	1651	>sp|P02817|AMELX_BOVIN Amelogenin, X isoform OS=Bos taurus OX=9913 GN=AMELX PE=1 SV=2	1	hf1_10472_ebo_32_1_261219.ScanId;v=1;d1=34522.34522.2	controllerType=0 controllerNumber=1 scan=34522	69.189
14694:2	1	S.M[+15.995]PLPPHPG.H		M[+16]	431.221	2	861.434	861.429	0	6.1	17	Non	311.68	234.13	68.01	4.18	1651	>sp|P02817|AMELX_BOVIN Amelogenin, X isoform OS=Bos taurus OX=9913 GN=AMELX PE=1 SV=2	1	hf1_10472_ebo_32_1_261219.ScanId;v=1;d1=11961.11961.2	controllerType=0 controllerNumber=1 scan=11961	28.039
47400:2	1	S.M[+15.995]PLPPHPG.H		M[+16]	431.22	2	861.433	861.429	0	5.3	17	Non	314.44	314.44	67.38	4.66	1651	>sp|P02817|AMELX_BOVIN Amelogenin, X isoform OS=Bos taurus OX=9913 GN=AMELX PE=1 SV=2	1	hf1_10472_ebo_32_1_261219.ScanId;v=1;d1=34283.34283.2	controllerType=0 controllerNumber=1 scan=34283	68.6777
48246:2	1	S.M[+15.995]PLPPHPG.H		M[+16]	431.22	2	861.433	861.429	0	5.6	17	Non	321.65	321.65	72.42	4.94	1651	>sp|P02817|AMELX_BOVIN Amelogenin, X isoform OS=Bos taurus OX=9913 GN=AMELX PE=1 SV=2	1	hf1_10472_ebo_32_1_261219.ScanId;v=1;d1=34982.34982.2	controllerType=0 controllerNumber=1 scan=34982	70.1961
49059:2	1	S.M[+15.995]PLPPHPG.H		M[+16]	431.22	2	861.433	861.429	0	5	17	Non	326.29	325.78	70.38	4.89	1651	>sp|P02817|AMELX_BOVIN Amelogenin, X isoform OS=Bos taurus OX=9913 GN=AMELX PE=1 SV=2	1	hf1_10472_ebo_32_1_261219.ScanId;v=1;d1=35647.35647.2	controllerType=0 controllerNumber=1 scan=35647	71.6819
13642:2	1	S.M[+15.995]PLPPHPG.H		M[+16]	431.221	2	861.434	861.429	0	6	17	Non	330.06	178.22	30.9	3.65	1651	>sp|P02817|AMELX_BOVIN Amelogenin, X isoform OS=Bos taurus OX=9913 GN=AMELX PE=1 SV=2	1	hf1_10472_ebo_32_1_261219.ScanId;v=1;d1=11241.11241.2	controllerType=0 controllerNumber=1 scan=11241	26.7609
01318:2	1	S.M[+15.995]PLPPHPG.H		M[+16]	431.22	2	861.432	861.429	0	3.8	17	Non	335.55	335.55	85.73	5.12	1651	>sp|P02817|AMELX_BOVIN Amelogenin, X isoform OS=Bos taurus OX=9913 GN=AMELX PE=1 SV=2	1	hf1_10472_ebo_32_1_261219.ScanId;v=1;d1=2612.2612.2	controllerType=0 controllerNumber=1 scan=2612	12.1573
13270:2	1	S.M[+15.995]PLPPHPG.H		M[+16]	431.221	2	861.434	861.429	0	5.7	17	Non	342.4	167.2	33.92	3.65	1651	>sp|P02817|AMELX_BOVIN Amelogenin, X isoform OS=Bos taurus OX=9913 GN=AMELX PE=1 SV=2	1	hf1_10472_ebo_32_1_261219.ScanId;v=1;d1=10994.10994.2	controllerType=0 controllerNumber=1 scan=10994	26.3325
47597:2	1	S.M[+15.995]PLPPHPG.H		M[+16]	431.22	2	861.433	861.429	0	5	17	Non	342.54	314.43	72.34	4.82	1651	>sp|P02817|AMELX_BOVIN Amelogenin, X isoform OS=Bos taurus OX=9913 GN=AMELX PE=1 SV=2	1	hf1_10472_ebo_32_1_261219.ScanId;v=1;d1=34443.34443.2	controllerType=0 controllerNumber=1 scan=34443	69.0164
48858:2	1	S.M[+15.995]PLPPHPG.H		M[+16]	431.22	2	861.433	861.429	0	4.8	17	Non	350.6	346.06	88.41	5.4	1651	>sp|P02817|AMELX_BOVIN Amelogenin, X isoform OS=Bos taurus OX=9913 GN=AMELX PE=1 SV=2	1	hf1_10472_ebo_32_1_261219.ScanId;v=1;d1=35486.35486.2	controllerType=0 controllerNumber=1 scan=35486	71.3398
13941:2	1	S.M[+15.995]PLPPHPG.H		M[+16]	431.22	2	861.433	861.429	0	4.8	17	Non	364.57	184.95	34.89	3.98	1651	>sp|P02817|AMELX_BOVIN Amelogenin, X isoform OS=Bos taurus OX=9913 GN=AMELX PE=1 SV=2	1	hf1_10472_ebo_32_1_261219.ScanId;v=1;d1=11441.11441.2	controllerType=0 controllerNumber=1 scan=11441	27.1085
12325:2	1	S.M[+15.995]PLPPHPG.H		M[+16]	431.221	2	861.434	861.429	0	5.8	17	Non	378.98	252.57	48.25	4.29	1651	>sp|P02817|AMELX_BOVIN Amelogenin, X isoform OS=Bos taurus OX=9913 GN=AMELX PE=1 SV=2	1	hf1_10472_ebo_32_1_261219.ScanId;v=1;d1=10359.10359.2	controllerType=0 controllerNumber=1 scan=10359	25.2176
11752:2	1	S.M[+15.995]PLPPHPG.H		M[+16]	431.221	2	861.434	861.429	0	5.8	17	Non	394.22	314.79	56.94	4.5	1651	>sp|P02817|AMELX_BOVIN Amelogenin, X isoform OS=Bos taurus OX=9913 GN=AMELX PE=1 SV=2	1	hf1_10472_ebo_32_1_261219.ScanId;v=1;d1=9957.9957.2	controllerType=0 controllerNumber=1 scan=9957	24.5248
11472:2	1	S.M[+15.995]PLPPHPG.H		M[+16]	431.22	2	861.433	861.429	0	4.9	17	Non	410.73	303.91	87.8	4.79	1651	>sp|P02817|AMELX_BOVIN Amelogenin, X isoform OS=Bos taurus OX=9913 GN=AMELX PE=1 SV=2	1	hf1_10472_ebo_32_1_261219.ScanId;v=1;d1=9759.9759.2	controllerType=0 controllerNumber=1 scan=9759	24.177
12048:2	1	S.M[+15.995]PLPPHPG.H		M[+16]	431.22	2	861.432	861.429	0	4.1	17	Non	411.5	334.41	63.17	4.36	1651	>sp|P02817|AMELX_BOVIN Amelogenin, X isoform OS=Bos taurus OX=9913 GN=AMELX PE=1 SV=2	1	hf1_10472_ebo_32_1_261219.ScanId;v=1;d1=10160.10160.2	controllerType=0 controllerNumber=1 scan=10160	24.8669
09226:2	1	S.M[+15.995]PLPPHPG.H		M[+16]	431.221	2	861.434	861.429	0	5.8	17	Non	424.3	384.1	96.47	5.78	1651	>sp|P02817|AMELX_BOVIN Amelogenin, X isoform OS=Bos taurus OX=9913 GN=AMELX PE=1 SV=2	1	hf1_10472_ebo_32_1_261219.ScanId;v=1;d1=8185.8185.2	controllerType=0 controllerNumber=1 scan=8185	21.4247
08923:2	1	S.M[+15.995]PLPPHPG.H		M[+16]	431.22	2	861.433	861.429	0	5.3	17	Non	433.38	377.09	100.97	6.29	1651	>sp|P02817|AMELX_BOVIN Amelogenin, X isoform OS=Bos taurus OX=9913 GN=AMELX PE=1 SV=2	1	hf1_10472_ebo_32_1_261219.ScanId;v=1;d1=7980.7980.2	controllerType=0 controllerNumber=1 scan=7980	21.0798
10625:2	1	S.M[+15.995]PLPPHPG.H		M[+16]	431.221	2	861.435	861.429	0	6.8	17	Non	433.62	374.17	97.89	5.84	1651	>sp|P02817|AMELX_BOVIN Amelogenin, X isoform OS=Bos taurus OX=9913 GN=AMELX PE=1 SV=2	1	hf1_10472_ebo_32_1_261219.ScanId;v=1;d1=9178.9178.2	controllerType=0 controllerNumber=1 scan=9178	23.1452
09775:2	1	S.M[+15.995]PLPPHPG.H		M[+16]	431.221	2	861.435	861.429	0	7.3	17	Non	436.44	372.4	100.76	5.62	1651	>sp|P02817|AMELX_BOVIN Amelogenin, X isoform OS=Bos taurus OX=9913 GN=AMELX PE=1 SV=2	1	hf1_10472_ebo_32_1_261219.ScanId;v=1;d1=8579.8579.2	controllerType=0 controllerNumber=1 scan=8579	22.1101
08648:2	1	S.M[+15.995]PLPPHPG.H		M[+16]	431.221	2	861.434	861.429	0	5.9	17	Non	436.5	372.31	93.94	5.78	1651	>sp|P02817|AMELX_BOVIN Amelogenin, X isoform OS=Bos taurus OX=9913 GN=AMELX PE=1 SV=2	1	hf1_10472_ebo_32_1_261219.ScanId;v=1;d1=7783.7783.2	controllerType=0 controllerNumber=1 scan=7783	20.7386
09491:2	1	S.M[+15.995]PLPPHPG.H		M[+16]	431.22	2	861.433	861.429	0	5.1	17	Non	441.18	378.5	100.35	5.9	1651	>sp|P02817|AMELX_BOVIN Amelogenin, X isoform OS=Bos taurus OX=9913 GN=AMELX PE=1 SV=2	1	hf1_10472_ebo_32_1_261219.ScanId;v=1;d1=8379.8379.2	controllerType=0 controllerNumber=1 scan=8379	21.7646
11196:2	1	S.M[+15.995]PLPPHPG.H		M[+16]	431.22	2	861.433	861.429	0	4.7	17	Non	442.75	350.46	91.99	4.7	1651	>sp|P02817|AMELX_BOVIN Amelogenin, X isoform OS=Bos taurus OX=9913 GN=AMELX PE=1 SV=2	1	hf1_10472_ebo_32_1_261219.ScanId;v=1;d1=9563.9563.2	controllerType=0 controllerNumber=1 scan=9563	23.8273
10342:2	1	S.M[+15.995]PLPPHPG.H		M[+16]	431.221	2	861.435	861.429	0	7	17	Non	445.92	356.95	95.01	4.75	1651	>sp|P02817|AMELX_BOVIN Amelogenin, X isoform OS=Bos taurus OX=9913 GN=AMELX PE=1 SV=2	1	hf1_10472_ebo_32_1_261219.ScanId;v=1;d1=8984.8984.2	controllerType=0 controllerNumber=1 scan=8984	22.8061
10053:2	1	S.M[+15.995]PLPPHPG.H		M[+16]	431.221	2	861.435	861.429	0	6.8	17	Non	447.82	384.99	103.53	5.9	1651	>sp|P02817|AMELX_BOVIN Amelogenin, X isoform OS=Bos taurus OX=9913 GN=AMELX PE=1 SV=2	1	hf1_10472_ebo_32_1_261219.ScanId;v=1;d1=8779.8779.2	controllerType=0 controllerNumber=1 scan=8779	22.4509
10919:2	1	S.M[+15.995]PLPPHPG.H		M[+16]	431.221	2	861.434	861.429	0	5.9	17	Non	461.71	345.18	94.72	4.96	1651	>sp|P02817|AMELX_BOVIN Amelogenin, X isoform OS=Bos taurus OX=9913 GN=AMELX PE=1 SV=2	1	hf1_10472_ebo_32_1_261219.ScanId;v=1;d1=9374.9374.2	controllerType=0 controllerNumber=1 scan=9374	23.4866
09558:2	1	S.M[+15.995]PLPPH[+15.995]PG.H		H[+16], M[+16]	439.218	2	877.428	877.424	0	5.2	17	Non	205.97	93.7	2.74	0.9	1651	>sp|P02817|AMELX_BOVIN Amelogenin, X isoform OS=Bos taurus OX=9913 GN=AMELX PE=1 SV=2	1	hf1_10472_ebo_32_1_261219.ScanId;v=1;d1=8431.8431.3	controllerType=0 controllerNumber=1 scan=8431	21.8574
08928:2	1	S.M[+15.995]PLPPH[+15.995]PG.H		H[+16], M[+16]	439.217	2	877.427	877.424	0	4	17	Non	216.26	67.11	1.17	0.66	1651	>sp|P02817|AMELX_BOVIN Amelogenin, X isoform OS=Bos taurus OX=9913 GN=AMELX PE=1 SV=2	1	hf1_10472_ebo_32_1_261219.ScanId;v=1;d1=7984.7984.3	controllerType=0 controllerNumber=1 scan=7984	21.0839
08186:2	1	S.M[+15.995]PLPPH[+15.995]PG.H		H[+16], M[+16]	439.218	2	877.43	877.424	0	6.7	17	Non	259.45	125.05	2.64	2.35	1651	>sp|P02817|AMELX_BOVIN Amelogenin, X isoform OS=Bos taurus OX=9913 GN=AMELX PE=1 SV=2	1	hf1_10472_ebo_32_1_261219.ScanId;v=1;d1=7460.7460.2	controllerType=0 controllerNumber=1 scan=7460	20.2049
07472:2	1	S.M[+15.995]PLPPHP[+15.995]G.H		M[+16], P[+16]	439.217	2	877.428	877.424	0	4.4	17	Non	288.28	131.05	37.08	2.54	1651	>sp|P02817|AMELX_BOVIN Amelogenin, X isoform OS=Bos taurus OX=9913 GN=AMELX PE=1 SV=2	1	hf1_10472_ebo_32_1_261219.ScanId;v=1;d1=6959.6959.2	controllerType=0 controllerNumber=1 scan=6959	19.3576
06625:2	1	S.M[+15.995]PLP[+15.995]PHPG.H		M[+16], P[+16]	439.218	2	877.428	877.424	0	4.9	17	Non	304.12	193.15	0	3.49	1651	>sp|P02817|AMELX_BOVIN Amelogenin, X isoform OS=Bos taurus OX=9913 GN=AMELX PE=1 SV=2	1	hf1_10472_ebo_32_1_261219.ScanId;v=1;d1=6355.6355.2	controllerType=0 controllerNumber=1 scan=6355	18.3267
06910:2	1	S.M[+15.995]PLPP[+15.995]HPG.H		M[+16], P[+16]	439.217	2	877.428	877.424	0	4.5	17	Non	307.71	192.3	5.81	3.6	1651	>sp|P02817|AMELX_BOVIN Amelogenin, X isoform OS=Bos taurus OX=9913 GN=AMELX PE=1 SV=2	1	hf1_10472_ebo_32_1_261219.ScanId;v=1;d1=6561.6561.2	controllerType=0 controllerNumber=1 scan=6561	18.677
08510:2	1	S.M[+15.995]PLPPH[+15.995]PG.H		H[+16], M[+16]	439.218	2	877.429	877.424	0	5.8	17	Non	311.42	196.63	2.75	3.49	1651	>sp|P02817|AMELX_BOVIN Amelogenin, X isoform OS=Bos taurus OX=9913 GN=AMELX PE=1 SV=2	1	hf1_10472_ebo_32_1_261219.ScanId;v=1;d1=7690.7690.2	controllerType=0 controllerNumber=1 scan=7690	20.5831
07757:2	1	S.M[+15.995]PLPP[+15.995]HPG.H		M[+16], P[+16]	439.218	2	877.429	877.424	0	6.5	17	Non	332.24	151.07	3.51	3.12	1651	>sp|P02817|AMELX_BOVIN Amelogenin, X isoform OS=Bos taurus OX=9913 GN=AMELX PE=1 SV=2	1	hf1_10472_ebo_32_1_261219.ScanId;v=1;d1=7163.7163.2	controllerType=0 controllerNumber=1 scan=7163	19.7031
12679:2	1	S.MPLPPHPGH.P			491.754	2	982.501	982.493	0	8.6	17	Non	215.35	215.35	215.35	2.55	1651	>sp|P02817|AMELX_BOVIN Amelogenin, X isoform OS=Bos taurus OX=9913 GN=AMELX PE=1 SV=2	1	hf1_10472_ebo_32_1_261219.ScanId;v=1;d1=10597.10597.2	controllerType=0 controllerNumber=1 scan=10597	25.6296
12308:2	1	S.MPLPPHPGH.P			491.753	2	982.5	982.493	0	6.9	17	Non	324.66	308.9	308.9	5.2	1651	>sp|P02817|AMELX_BOVIN Amelogenin, X isoform OS=Bos taurus OX=9913 GN=AMELX PE=1 SV=2	1	hf1_10472_ebo_32_1_261219.ScanId;v=1;d1=10345.10345.3	controllerType=0 controllerNumber=1 scan=10345	25.192
49930:2	1	S.MPLPPHPGH.P			491.753	2	982.499	982.493	0	6.6	17	Non	365.27	365.27	365.27	6.52	1651	>sp|P02817|AMELX_BOVIN Amelogenin, X isoform OS=Bos taurus OX=9913 GN=AMELX PE=1 SV=2	1	hf1_10472_ebo_32_1_261219.ScanId;v=1;d1=36377.36377.2	controllerType=0 controllerNumber=1 scan=36377	73.4212
12025:2	1	S.MPLPPHPGH.P			491.752	2	982.497	982.493	0	4.6	17	Non	566.11	445.39	445.39	7.18	1651	>sp|P02817|AMELX_BOVIN Amelogenin, X isoform OS=Bos taurus OX=9913 GN=AMELX PE=1 SV=2	1	hf1_10472_ebo_32_1_261219.ScanId;v=1;d1=10144.10144.2	controllerType=0 controllerNumber=1 scan=10144	24.8386
11686:2	1	S.MPLPPHPGH.P			491.752	2	982.498	982.493	0	5	17	Non	567.93	435.24	435.24	7.52	1651	>sp|P02817|AMELX_BOVIN Amelogenin, X isoform OS=Bos taurus OX=9913 GN=AMELX PE=1 SV=2	1	hf1_10472_ebo_32_1_261219.ScanId;v=1;d1=9911.9911.2	controllerType=0 controllerNumber=1 scan=9911	24.4402
11407:2	1	S.MPLPPHPGH.P			491.752	2	982.497	982.493	0	4.5	17	Non	592.34	484.05	484.05	7.7	1651	>sp|P02817|AMELX_BOVIN Amelogenin, X isoform OS=Bos taurus OX=9913 GN=AMELX PE=1 SV=2	1	hf1_10472_ebo_32_1_261219.ScanId;v=1;d1=9710.9710.2	controllerType=0 controllerNumber=1 scan=9710	24.0897
10527:2	1	S.MPLPPHPGH.P			491.753	2	982.498	982.493	0	5.7	17	Non	592.72	433.33	433.33	7.52	1651	>sp|P02817|AMELX_BOVIN Amelogenin, X isoform OS=Bos taurus OX=9913 GN=AMELX PE=1 SV=2	1	hf1_10472_ebo_32_1_261219.ScanId;v=1;d1=9117.9117.2	controllerType=0 controllerNumber=1 scan=9117	23.0398
11130:2	1	S.MPLPPHPGH.P			491.752	2	982.498	982.493	0	5.1	17	Non	596.43	459.24	459.24	7.97	1651	>sp|P02817|AMELX_BOVIN Amelogenin, X isoform OS=Bos taurus OX=9913 GN=AMELX PE=1 SV=2	1	hf1_10472_ebo_32_1_261219.ScanId;v=1;d1=9517.9517.2	controllerType=0 controllerNumber=1 scan=9517	23.7402
10840:2	1	S.MPLPPHPGH.P			491.753	2	982.499	982.493	0	6	17	Non	599.1	472.29	472.29	7.97	1651	>sp|P02817|AMELX_BOVIN Amelogenin, X isoform OS=Bos taurus OX=9913 GN=AMELX PE=1 SV=2	1	hf1_10472_ebo_32_1_261219.ScanId;v=1;d1=9321.9321.2	controllerType=0 controllerNumber=1 scan=9321	23.3945
10665:2	1	S.M[+15.995]PLPPHPGH.P		M[+16]	499.749	2	998.491	998.488	0	3.7	17	Non	179.4	179.4	0.91	1.39	1651	>sp|P02817|AMELX_BOVIN Amelogenin, X isoform OS=Bos taurus OX=9913 GN=AMELX PE=1 SV=2	1	hf1_10472_ebo_32_1_261219.ScanId;v=1;d1=9207.9207.2	controllerType=0 controllerNumber=1 scan=9207	23.1957
07523:2	1	S.M[+15.995]PLPPHPGH.P		M[+16]	499.75	2	998.492	998.488	0	4.8	17	Non	187.03	187.03	17.45	2.97	1651	>sp|P02817|AMELX_BOVIN Amelogenin, X isoform OS=Bos taurus OX=9913 GN=AMELX PE=1 SV=2	1	hf1_10472_ebo_32_1_261219.ScanId;v=1;d1=6996.6996.2	controllerType=0 controllerNumber=1 scan=6996	19.4239
07545:2	1	S.M[+31.990]PLPPHPGH.P		M[+32]	507.748	2	1014.49	1014.48	0	5.9	17	Non	372.56	319.12	6.52	4.86	1651	>sp|P02817|AMELX_BOVIN Amelogenin, X isoform OS=Bos taurus OX=9913 GN=AMELX PE=1 SV=2	1	hf1_10472_ebo_32_1_261219.ScanId;v=1;d1=7012.7012.2	controllerType=0 controllerNumber=1 scan=7012	19.4527
08274:2	1	S.M[+15.995]PLPPHPGH.P		M[+16]	499.75	2	998.494	998.488	0	6	17	Non	383.64	345.63	76.55	5.37	1651	>sp|P02817|AMELX_BOVIN Amelogenin, X isoform OS=Bos taurus OX=9913 GN=AMELX PE=1 SV=2	1	hf1_10472_ebo_32_1_261219.ScanId;v=1;d1=7519.7519.2	controllerType=0 controllerNumber=1 scan=7519	20.3
07616:2	1	S.M[+15.995]PLPPHPGH.P		M[+16]	499.75	2	998.494	998.488	0	5.9	17	Non	469.76	404.61	68.06	6.6	1651	>sp|P02817|AMELX_BOVIN Amelogenin, X isoform OS=Bos taurus OX=9913 GN=AMELX PE=1 SV=2	1	hf1_10472_ebo_32_1_261219.ScanId;v=1;d1=7064.7064.2	controllerType=0 controllerNumber=1 scan=7064	19.5394
07232:2	1	S.M[+15.995]PLPPHPGH.P		M[+16]	499.75	2	998.493	998.488	0	5.3	17	Non	524.19	467.94	102.01	6.74	1651	>sp|P02817|AMELX_BOVIN Amelogenin, X isoform OS=Bos taurus OX=9913 GN=AMELX PE=1 SV=2	1	hf1_10472_ebo_32_1_261219.ScanId;v=1;d1=6791.6791.2	controllerType=0 controllerNumber=1 scan=6791	19.0765
05554:2	1	S.M[+15.995]PLPPHPGH.P		M[+16]	499.75	2	998.494	998.488	0	6	17	Non	544.34	451.62	132.93	6.74	1651	>sp|P02817|AMELX_BOVIN Amelogenin, X isoform OS=Bos taurus OX=9913 GN=AMELX PE=1 SV=2	1	hf1_10472_ebo_32_1_261219.ScanId;v=1;d1=5575.5575.2	controllerType=0 controllerNumber=1 scan=5575	16.9994
06408:2	1	S.M[+15.995]PLPPHPGH.P		M[+16]	499.75	2	998.492	998.488	0	4.4	17	Non	559.04	508.31	110.41	6.92	1651	>sp|P02817|AMELX_BOVIN Amelogenin, X isoform OS=Bos taurus OX=9913 GN=AMELX PE=1 SV=2	1	hf1_10472_ebo_32_1_261219.ScanId;v=1;d1=6191.6191.2	controllerType=0 controllerNumber=1 scan=6191	18.039
06944:2	1	S.M[+15.995]PLPPHPGH.P		M[+16]	499.75	2	998.492	998.488	0	4.5	17	Non	567.48	499.95	114.93	7.7	1651	>sp|P02817|AMELX_BOVIN Amelogenin, X isoform OS=Bos taurus OX=9913 GN=AMELX PE=1 SV=2	1	hf1_10472_ebo_32_1_261219.ScanId;v=1;d1=6586.6586.2	controllerType=0 controllerNumber=1 scan=6586	18.7213
06667:2	1	S.M[+15.995]PLPPHPGH.P		M[+16]	499.75	2	998.493	998.488	0	5.4	17	Non	570.97	479.4	128.64	7.97	1651	>sp|P02817|AMELX_BOVIN Amelogenin, X isoform OS=Bos taurus OX=9913 GN=AMELX PE=1 SV=2	1	hf1_10472_ebo_32_1_261219.ScanId;v=1;d1=6386.6386.2	controllerType=0 controllerNumber=1 scan=6386	18.3824
05852:2	1	S.M[+15.995]PLPPHPGH.P		M[+16]	499.75	2	998.492	998.488	0	4.7	17	Non	580.16	497.48	120.94	7.97	1651	>sp|P02817|AMELX_BOVIN Amelogenin, X isoform OS=Bos taurus OX=9913 GN=AMELX PE=1 SV=2	1	hf1_10472_ebo_32_1_261219.ScanId;v=1;d1=5789.5789.2	controllerType=0 controllerNumber=1 scan=5789	17.3451
06122:2	1	S.M[+15.995]PLPPHPGH.P		M[+16]	499.75	2	998.494	998.488	0	5.8	17	Non	582.47	479.84	121.63	7.97	1651	>sp|P02817|AMELX_BOVIN Amelogenin, X isoform OS=Bos taurus OX=9913 GN=AMELX PE=1 SV=2	1	hf1_10472_ebo_32_1_261219.ScanId;v=1;d1=5984.5984.2	controllerType=0 controllerNumber=1 scan=5984	17.6885
09259:2	1	S.M[+15.995]PLPP[+15.995]HPGH.P		M[+16], P[+16]	507.748	2	1014.49	1014.48	0	6	17	Non	166.46	166.46	2.56	1.78	1651	>sp|P02817|AMELX_BOVIN Amelogenin, X isoform OS=Bos taurus OX=9913 GN=AMELX PE=1 SV=2	1	hf1_10472_ebo_32_1_261219.ScanId;v=1;d1=8208.8208.2	controllerType=0 controllerNumber=1 scan=8208	21.463
13376:2	1	S.MPLPPHPGHP.G			540.28	2	1079.55	1079.55	0	6.2	17	Non	545.15	348.18	348.18	6.32	1651	>sp|P02817|AMELX_BOVIN Amelogenin, X isoform OS=Bos taurus OX=9913 GN=AMELX PE=1 SV=2	1	hf1_10472_ebo_32_1_261219.ScanId;v=1;d1=11064.11064.2	controllerType=0 controllerNumber=1 scan=11064	26.4566
11919:2	1	S.MPLPPHPGHP.G			540.279	2	1079.55	1079.55	0	5.4	17	Non	612.94	366.97	366.97	8.97	1651	>sp|P02817|AMELX_BOVIN Amelogenin, X isoform OS=Bos taurus OX=9913 GN=AMELX PE=1 SV=2	1	hf1_10472_ebo_32_1_261219.ScanId;v=1;d1=10074.10074.2	controllerType=0 controllerNumber=1 scan=10074	24.7207
13083:2	1	S.MPLPPHPGHP.G			540.28	2	1079.55	1079.55	0	6.1	17	Non	639.98	409.95	409.95	8.97	1651	>sp|P02817|AMELX_BOVIN Amelogenin, X isoform OS=Bos taurus OX=9913 GN=AMELX PE=1 SV=2	1	hf1_10472_ebo_32_1_261219.ScanId;v=1;d1=10866.10866.2	controllerType=0 controllerNumber=1 scan=10866	26.103
12792:2	1	S.MPLPPHPGHP.G			540.279	2	1079.55	1079.55	0	5.4	17	Non	651.14	398.55	398.55	9.97	1651	>sp|P02817|AMELX_BOVIN Amelogenin, X isoform OS=Bos taurus OX=9913 GN=AMELX PE=1 SV=2	1	hf1_10472_ebo_32_1_261219.ScanId;v=1;d1=10669.10669.2	controllerType=0 controllerNumber=1 scan=10669	25.757
12494:2	1	S.MPLPPHPGHP.G			540.28	2	1079.55	1079.55	0	6	17	Non	681.19	428.5	428.5	9.97	1651	>sp|P02817|AMELX_BOVIN Amelogenin, X isoform OS=Bos taurus OX=9913 GN=AMELX PE=1 SV=2	1	hf1_10472_ebo_32_1_261219.ScanId;v=1;d1=10472.10472.2	controllerType=0 controllerNumber=1 scan=10472	25.4165
12205:2	1	S.MPLPPHPGHP.G			540.279	2	1079.55	1079.55	0	5.3	17	Non	687.56	412.3	412.3	9.97	1651	>sp|P02817|AMELX_BOVIN Amelogenin, X isoform OS=Bos taurus OX=9913 GN=AMELX PE=1 SV=2	1	hf1_10472_ebo_32_1_261219.ScanId;v=1;d1=10273.10273.2	controllerType=0 controllerNumber=1 scan=10273	25.0665
09283:2	1	S.M[+15.995]PLPPHPGHP.G		M[+16]	548.277	2	1095.55	1095.54	0	5.3	17	Non	134.49	134.49	21.88	2.29	1651	>sp|P02817|AMELX_BOVIN Amelogenin, X isoform OS=Bos taurus OX=9913 GN=AMELX PE=1 SV=2	1	hf1_10472_ebo_32_1_261219.ScanId;v=1;d1=8228.8228.2	controllerType=0 controllerNumber=1 scan=8228	21.4996
10278:2	1	S.M[+15.995]PLPPHPGHP.G		M[+16]	548.277	2	1095.55	1095.54	0	5.5	17	Non	190.03	190.03	2.91	2.48	1651	>sp|P02817|AMELX_BOVIN Amelogenin, X isoform OS=Bos taurus OX=9913 GN=AMELX PE=1 SV=2	1	hf1_10472_ebo_32_1_261219.ScanId;v=1;d1=8936.8936.3	controllerType=0 controllerNumber=1 scan=8936	22.7224
09791:2	1	S.M[+15.995]PLPPHPGHP.G		M[+16]	548.277	2	1095.55	1095.54	0	6.4	17	Non	226.29	159.16	19.21	2.42	1651	>sp|P02817|AMELX_BOVIN Amelogenin, X isoform OS=Bos taurus OX=9913 GN=AMELX PE=1 SV=2	1	hf1_10472_ebo_32_1_261219.ScanId;v=1;d1=8592.8592.2	controllerType=0 controllerNumber=1 scan=8592	22.1314
08991:2	1	S.M[+15.995]PLPPHPGHP.G		M[+16]	548.276	2	1095.55	1095.54	0	4.7	17	Non	233.72	171.19	11.72	2.97	1651	>sp|P02817|AMELX_BOVIN Amelogenin, X isoform OS=Bos taurus OX=9913 GN=AMELX PE=1 SV=2	1	hf1_10472_ebo_32_1_261219.ScanId;v=1;d1=8026.8026.2	controllerType=0 controllerNumber=1 scan=8026	21.1571
10824:2	1	S.MPLPPHPGHP[+15.995].G		P[+16]	548.276	2	1095.54	1095.54	0	3.6	17	Non	266.02	205.28	34.17	4.21	1651	>sp|P02817|AMELX_BOVIN Amelogenin, X isoform OS=Bos taurus OX=9913 GN=AMELX PE=1 SV=2	1	hf1_10472_ebo_32_1_261219.ScanId;v=1;d1=9310.9310.2	controllerType=0 controllerNumber=1 scan=9310	23.3752
09761:2	1	S.M[+15.995]PLPPHPGHP.G		M[+16]	548.277	2	1095.55	1095.54	0	4.8	17	Non	283.22	193.16	49.31	4.55	1651	>sp|P02817|AMELX_BOVIN Amelogenin, X isoform OS=Bos taurus OX=9913 GN=AMELX PE=1 SV=2	1	hf1_10472_ebo_32_1_261219.ScanId;v=1;d1=8569.8569.2	controllerType=0 controllerNumber=1 scan=8569	22.0932
09818:2	1	S.M[+15.995]PLPPHPGHP.G		M[+16]	548.278	2	1095.55	1095.54	0	7.1	17	Non	314.04	234.9	50.43	4.71	1651	>sp|P02817|AMELX_BOVIN Amelogenin, X isoform OS=Bos taurus OX=9913 GN=AMELX PE=1 SV=2	1	hf1_10472_ebo_32_1_261219.ScanId;v=1;d1=8609.8609.2	controllerType=0 controllerNumber=1 scan=8609	22.158
11114:2	1	S.MPLPPHPGHP[+15.995].G		P[+16]	548.277	2	1095.55	1095.54	0	5.8	17	Non	338.4	252.03	0.27	4.99	1651	>sp|P02817|AMELX_BOVIN Amelogenin, X isoform OS=Bos taurus OX=9913 GN=AMELX PE=1 SV=2	1	hf1_10472_ebo_32_1_261219.ScanId;v=1;d1=9507.9507.2	controllerType=0 controllerNumber=1 scan=9507	23.723
09554:2	1	S.M[+15.995]PLPPHPGHP.G		M[+16]	548.275	2	1095.54	1095.54	0	2.7	17	Non	416.67	354.7	62.21	5.33	1651	>sp|P02817|AMELX_BOVIN Amelogenin, X isoform OS=Bos taurus OX=9913 GN=AMELX PE=1 SV=2	1	hf1_10472_ebo_32_1_261219.ScanId;v=1;d1=8428.8428.3	controllerType=0 controllerNumber=1 scan=8428	21.8529
07273:2	1	S.M[+15.995]PLPPHPGHP.G		M[+16]	548.277	2	1095.55	1095.54	0	5.9	17	Non	424.05	318.41	62.49	5.22	1651	>sp|P02817|AMELX_BOVIN Amelogenin, X isoform OS=Bos taurus OX=9913 GN=AMELX PE=1 SV=2	1	hf1_10472_ebo_32_1_261219.ScanId;v=1;d1=6818.6818.2	controllerType=0 controllerNumber=1 scan=6818	19.118
09269:2	1	S.M[+15.995]PLPPHPGHP.G		M[+16]	548.277	2	1095.55	1095.54	0	4.9	17	Non	445.15	304.5	60.54	5.28	1651	>sp|P02817|AMELX_BOVIN Amelogenin, X isoform OS=Bos taurus OX=9913 GN=AMELX PE=1 SV=2	1	hf1_10472_ebo_32_1_261219.ScanId;v=1;d1=8217.8217.2	controllerType=0 controllerNumber=1 scan=8217	21.482
08925:2	1	S.M[+15.995]PLPPHPGHP.G		M[+16]	548.276	2	1095.55	1095.54	0	4.6	17	Non	569.81	391.48	67.81	7.7	1651	>sp|P02817|AMELX_BOVIN Amelogenin, X isoform OS=Bos taurus OX=9913 GN=AMELX PE=1 SV=2	1	hf1_10472_ebo_32_1_261219.ScanId;v=1;d1=7982.7982.2	controllerType=0 controllerNumber=1 scan=7982	21.0816
08603:2	1	S.M[+15.995]PLPPHPGHP.G		M[+16]	548.277	2	1095.55	1095.54	0	5.7	17	Non	617.2	390.74	96.9	8.52	1651	>sp|P02817|AMELX_BOVIN Amelogenin, X isoform OS=Bos taurus OX=9913 GN=AMELX PE=1 SV=2	1	hf1_10472_ebo_32_1_261219.ScanId;v=1;d1=7754.7754.2	controllerType=0 controllerNumber=1 scan=7754	20.6901
07716:2	1	S.M[+15.995]PLPPHPGHP.G		M[+16]	548.278	2	1095.55	1095.54	0	6.6	17	Non	631.93	396.11	99	8.97	1651	>sp|P02817|AMELX_BOVIN Amelogenin, X isoform OS=Bos taurus OX=9913 GN=AMELX PE=1 SV=2	1	hf1_10472_ebo_32_1_261219.ScanId;v=1;d1=7135.7135.2	controllerType=0 controllerNumber=1 scan=7135	19.6545
08004:2	1	S.M[+15.995]PLPPHPGHP.G		M[+16]	548.277	2	1095.55	1095.54	0	5.8	17	Non	632.22	388.54	78.34	8.52	1651	>sp|P02817|AMELX_BOVIN Amelogenin, X isoform OS=Bos taurus OX=9913 GN=AMELX PE=1 SV=2	1	hf1_10472_ebo_32_1_261219.ScanId;v=1;d1=7336.7336.2	controllerType=0 controllerNumber=1 scan=7336	20.0005
08298:2	1	S.M[+15.995]PLPPHPGHP.G		M[+16]	548.277	2	1095.55	1095.54	0	6.2	17	Non	650.25	438.85	102.3	9.97	1651	>sp|P02817|AMELX_BOVIN Amelogenin, X isoform OS=Bos taurus OX=9913 GN=AMELX PE=1 SV=2	1	hf1_10472_ebo_32_1_261219.ScanId;v=1;d1=7539.7539.2	controllerType=0 controllerNumber=1 scan=7539	20.3372
07447:2	1	S.M[+15.995]PLPPHPGH[+15.995]P.G		H[+16], M[+16]	556.275	2	1111.54	1111.54	0	6.6	17	Non	243.72	196.03	6.37	4.12	1651	>sp|P02817|AMELX_BOVIN Amelogenin, X isoform OS=Bos taurus OX=9913 GN=AMELX PE=1 SV=2	1	hf1_10472_ebo_32_1_261219.ScanId;v=1;d1=6941.6941.2	controllerType=0 controllerNumber=1 scan=6941	19.3258
06876:2	1	S.M[+15.995]PLPPHPGH[+15.995]P.G		H[+16], M[+16]	556.275	2	1111.54	1111.54	0	5.9	17	Non	337.83	337.83	0.43	5.37	1651	>sp|P02817|AMELX_BOVIN Amelogenin, X isoform OS=Bos taurus OX=9913 GN=AMELX PE=1 SV=2	1	hf1_10472_ebo_32_1_261219.ScanId;v=1;d1=6533.6533.2	controllerType=0 controllerNumber=1 scan=6533	18.6265
00218:3	1	S.MPLPPHPGHPG.Y			379.529	3	1136.57	1136.57	0	4.2	17	Non	47.68	47.68	47.68	1.49	1651	>sp|P02817|AMELX_BOVIN Amelogenin, X isoform OS=Bos taurus OX=9913 GN=AMELX PE=1 SV=2	1	hf1_10472_ebo_32_1_261219.ScanId;v=1;d1=712.712.3	controllerType=0 controllerNumber=1 scan=712	3.644
00331:3	1	S.MPLPPHPGHPG.Y			379.529	3	1136.57	1136.57	0	5.1	17	Non	56.85	56.85	56.85	2.29	1651	>sp|P02817|AMELX_BOVIN Amelogenin, X isoform OS=Bos taurus OX=9913 GN=AMELX PE=1 SV=2	1	hf1_10472_ebo_32_1_261219.ScanId;v=1;d1=1088.1088.3	controllerType=0 controllerNumber=1 scan=1088	5.6917
00243:3	1	S.MPLPPHPGHPG.Y			379.529	3	1136.57	1136.57	0	5.3	17	Non	71.08	71.08	71.08	2.33	1651	>sp|P02817|AMELX_BOVIN Amelogenin, X isoform OS=Bos taurus OX=9913 GN=AMELX PE=1 SV=2	1	hf1_10472_ebo_32_1_261219.ScanId;v=1;d1=788.788.3	controllerType=0 controllerNumber=1 scan=788	4.0508
50215:3	1	S.MPLPPHPGHPG.Y			379.529	3	1136.57	1136.57	0	3.8	17	Non	78.57	78.57	78.57	2.3	1651	>sp|P02817|AMELX_BOVIN Amelogenin, X isoform OS=Bos taurus OX=9913 GN=AMELX PE=1 SV=2	1	hf1_10472_ebo_32_1_261219.ScanId;v=1;d1=36943.36943.3	controllerType=0 controllerNumber=1 scan=36943	76.0938
50178:3	1	S.MPLPPHPGHPG.Y			379.529	3	1136.57	1136.57	0	3.6	17	Non	106.38	106.38	106.38	2.29	1651	>sp|P02817|AMELX_BOVIN Amelogenin, X isoform OS=Bos taurus OX=9913 GN=AMELX PE=1 SV=2	1	hf1_10472_ebo_32_1_261219.ScanId;v=1;d1=36864.36864.3	controllerType=0 controllerNumber=1 scan=36864	75.7183
50391:3	1	S.MPLPPHPGHPG.Y			379.529	3	1136.57	1136.57	0	4.2	17	Non	153.49	153.49	153.49	2.38	1651	>sp|P02817|AMELX_BOVIN Amelogenin, X isoform OS=Bos taurus OX=9913 GN=AMELX PE=1 SV=2	1	hf1_10472_ebo_32_1_261219.ScanId;v=1;d1=37299.37299.3	controllerType=0 controllerNumber=1 scan=37299	77.7968
00561:3	1	S.MPLPPHPGHPG.Y			379.529	3	1136.57	1136.57	0	3.8	17	Non	170.15	170.15	170.15	3.07	1651	>sp|P02817|AMELX_BOVIN Amelogenin, X isoform OS=Bos taurus OX=9913 GN=AMELX PE=1 SV=2	1	hf1_10472_ebo_32_1_261219.ScanId;v=1;d1=2009.2009.3	controllerType=0 controllerNumber=1 scan=2009	10.7097
50355:3	1	S.MPLPPHPGHPG.Y			379.529	3	1136.57	1136.57	0	3.9	17	Non	202.65	202.65	202.65	3.15	1651	>sp|P02817|AMELX_BOVIN Amelogenin, X isoform OS=Bos taurus OX=9913 GN=AMELX PE=1 SV=2	1	hf1_10472_ebo_32_1_261219.ScanId;v=1;d1=37229.37229.3	controllerType=0 controllerNumber=1 scan=37229	77.4561
50255:3	1	S.MPLPPHPGHPG.Y			379.529	3	1136.57	1136.57	0	3.8	17	Non	212.82	212.82	212.82	3.39	1651	>sp|P02817|AMELX_BOVIN Amelogenin, X isoform OS=Bos taurus OX=9913 GN=AMELX PE=1 SV=2	1	hf1_10472_ebo_32_1_261219.ScanId;v=1;d1=37017.37017.3	controllerType=0 controllerNumber=1 scan=37017	76.4406
49392:3	1	S.MPLPPHPGHPG.Y			379.529	3	1136.57	1136.57	0	4.3	17	Non	218.69	218.69	218.69	3.15	1651	>sp|P02817|AMELX_BOVIN Amelogenin, X isoform OS=Bos taurus OX=9913 GN=AMELX PE=1 SV=2	1	hf1_10472_ebo_32_1_261219.ScanId;v=1;d1=35913.35913.2	controllerType=0 controllerNumber=1 scan=35913	72.2924
01678:3	1	S.MPLPPHPGHPG.Y			379.528	3	1136.57	1136.57	0	2.3	17	Non	248.87	248.87	248.87	3.83	1651	>sp|P02817|AMELX_BOVIN Amelogenin, X isoform OS=Bos taurus OX=9913 GN=AMELX PE=1 SV=2	1	hf1_10472_ebo_32_1_261219.ScanId;v=1;d1=2873.2873.3	controllerType=0 controllerNumber=1 scan=2873	12.6385
13487:3	1	S.MPLPPHPGHPG.Y			379.529	3	1136.57	1136.57	0	5.1	17	Non	249.98	237	237	4.27	1651	>sp|P02817|AMELX_BOVIN Amelogenin, X isoform OS=Bos taurus OX=9913 GN=AMELX PE=1 SV=2	1	hf1_10472_ebo_32_1_261219.ScanId;v=1;d1=11137.11137.3	controllerType=0 controllerNumber=1 scan=11137	26.5822
00678:3	1	S.MPLPPHPGHPG.Y			379.528	3	1136.57	1136.57	0	3	17	Non	255.09	255.09	255.09	4.54	1651	>sp|P02817|AMELX_BOVIN Amelogenin, X isoform OS=Bos taurus OX=9913 GN=AMELX PE=1 SV=2	1	hf1_10472_ebo_32_1_261219.ScanId;v=1;d1=2121.2121.3	controllerType=0 controllerNumber=1 scan=2121	11.0514
11865:2	1	S.MPLPPHPGHPG.Y			568.79	2	1136.57	1136.57	0	5.7	17	Non	255.09	143.79	143.79	3.56	1651	>sp|P02817|AMELX_BOVIN Amelogenin, X isoform OS=Bos taurus OX=9913 GN=AMELX PE=1 SV=2	1	hf1_10472_ebo_32_1_261219.ScanId;v=1;d1=10035.10035.2	controllerType=0 controllerNumber=1 scan=10035	24.6587
14488:3	1	S.MPLPPHPGHPG.Y			379.529	3	1136.57	1136.57	0	5.1	17	Non	258.06	253.84	253.84	4.6	1651	>sp|P02817|AMELX_BOVIN Amelogenin, X isoform OS=Bos taurus OX=9913 GN=AMELX PE=1 SV=2	1	hf1_10472_ebo_32_1_261219.ScanId;v=1;d1=11819.11819.3	controllerType=0 controllerNumber=1 scan=11819	27.7853
50330:3	1	S.MPLPPHPGHPG.Y			379.529	3	1136.57	1136.57	0	3.8	17	Non	263.82	263.82	263.82	4.6	1651	>sp|P02817|AMELX_BOVIN Amelogenin, X isoform OS=Bos taurus OX=9913 GN=AMELX PE=1 SV=2	1	hf1_10472_ebo_32_1_261219.ScanId;v=1;d1=37163.37163.3	controllerType=0 controllerNumber=1 scan=37163	77.1161
01030:3	1	S.MPLPPHPGHPG.Y			379.528	3	1136.57	1136.57	0	2.5	17	Non	277.28	277.28	277.28	4.54	1651	>sp|P02817|AMELX_BOVIN Amelogenin, X isoform OS=Bos taurus OX=9913 GN=AMELX PE=1 SV=2	1	hf1_10472_ebo_32_1_261219.ScanId;v=1;d1=2400.2400.3	controllerType=0 controllerNumber=1 scan=2400	11.749
01375:3	1	S.MPLPPHPGHPG.Y			379.528	3	1136.57	1136.57	0	3.3	17	Non	278.99	278.99	278.99	4.54	1651	>sp|P02817|AMELX_BOVIN Amelogenin, X isoform OS=Bos taurus OX=9913 GN=AMELX PE=1 SV=2	1	hf1_10472_ebo_32_1_261219.ScanId;v=1;d1=2652.2652.3	controllerType=0 controllerNumber=1 scan=2652	12.2345
00797:3	1	S.MPLPPHPGHPG.Y			379.529	3	1136.57	1136.57	0	3.4	17	Non	284.45	284.45	284.45	4.87	1651	>sp|P02817|AMELX_BOVIN Amelogenin, X isoform OS=Bos taurus OX=9913 GN=AMELX PE=1 SV=2	1	hf1_10472_ebo_32_1_261219.ScanId;v=1;d1=2236.2236.3	controllerType=0 controllerNumber=1 scan=2236	11.3946
50294:3	1	S.MPLPPHPGHPG.Y			379.529	3	1136.57	1136.57	0	3.7	17	Non	301.7	301.7	301.7	5.32	1651	>sp|P02817|AMELX_BOVIN Amelogenin, X isoform OS=Bos taurus OX=9913 GN=AMELX PE=1 SV=2	1	hf1_10472_ebo_32_1_261219.ScanId;v=1;d1=37090.37090.3	controllerType=0 controllerNumber=1 scan=37090	76.7789
49239:3	1	S.MPLPPHPGHPG.Y			379.529	3	1136.57	1136.57	0	3.9	17	Non	320.51	320.51	320.51	5.03	1651	>sp|P02817|AMELX_BOVIN Amelogenin, X isoform OS=Bos taurus OX=9913 GN=AMELX PE=1 SV=2	1	hf1_10472_ebo_32_1_261219.ScanId;v=1;d1=35787.35787.3	controllerType=0 controllerNumber=1 scan=35787	71.9961
49028:3	1	S.MPLPPHPGHPG.Y			379.529	3	1136.57	1136.57	0	4.4	17	Non	358.09	358.09	358.09	5.61	1651	>sp|P02817|AMELX_BOVIN Amelogenin, X isoform OS=Bos taurus OX=9913 GN=AMELX PE=1 SV=2	1	hf1_10472_ebo_32_1_261219.ScanId;v=1;d1=35623.35623.3	controllerType=0 controllerNumber=1 scan=35623	71.6273
48504:3	1	S.MPLPPHPGHPG.Y			379.529	3	1136.57	1136.57	0	4.4	17	Non	359.07	359.07	359.07	5.61	1651	>sp|P02817|AMELX_BOVIN Amelogenin, X isoform OS=Bos taurus OX=9913 GN=AMELX PE=1 SV=2	1	hf1_10472_ebo_32_1_261219.ScanId;v=1;d1=35195.35195.3	controllerType=0 controllerNumber=1 scan=35195	70.6672
48832:3	1	S.MPLPPHPGHPG.Y			379.529	3	1136.57	1136.57	0	4.8	17	Non	366.55	366.55	366.55	6.76	1651	>sp|P02817|AMELX_BOVIN Amelogenin, X isoform OS=Bos taurus OX=9913 GN=AMELX PE=1 SV=2	1	hf1_10472_ebo_32_1_261219.ScanId;v=1;d1=35465.35465.3	controllerType=0 controllerNumber=1 scan=35465	71.2912
13190:3	1	S.MPLPPHPGHPG.Y			379.529	3	1136.57	1136.57	0	4.8	17	Non	383.1	315.18	315.18	5.25	1651	>sp|P02817|AMELX_BOVIN Amelogenin, X isoform OS=Bos taurus OX=9913 GN=AMELX PE=1 SV=2	1	hf1_10472_ebo_32_1_261219.ScanId;v=1;d1=10941.10941.3	controllerType=0 controllerNumber=1 scan=10941	26.2378
00038:3	1	S.MPLPPHPGHPG.Y			379.529	3	1136.57	1136.57	0	6.1	17	Non	404	305.38	305.38	5.33	1651	>sp|P02817|AMELX_BOVIN Amelogenin, X isoform OS=Bos taurus OX=9913 GN=AMELX PE=1 SV=2	1	hf1_10472_ebo_32_1_261219.ScanId;v=1;d1=118.118.3	controllerType=0 controllerNumber=1 scan=118	0.5683
49923:3	1	S.MPLPPHPGHPG.Y			379.53	3	1136.57	1136.57	0	6.6	17	Non	411.44	376.01	376.01	6.78	1651	>sp|P02817|AMELX_BOVIN Amelogenin, X isoform OS=Bos taurus OX=9913 GN=AMELX PE=1 SV=2	1	hf1_10472_ebo_32_1_261219.ScanId;v=1;d1=36373.36373.3	controllerType=0 controllerNumber=1 scan=36373	73.4152
47777:2	1	S.MPLPPHPGHPG.Y			568.79	2	1136.57	1136.57	0	5.7	17	Non	421.52	347.87	347.87	5.6	1651	>sp|P02817|AMELX_BOVIN Amelogenin, X isoform OS=Bos taurus OX=9913 GN=AMELX PE=1 SV=2	1	hf1_10472_ebo_32_1_261219.ScanId;v=1;d1=34591.34591.3	controllerType=0 controllerNumber=1 scan=34591	69.3456
10725:3	1	S.MPLPPHPGHPG.Y			379.53	3	1136.57	1136.57	0	6.7	17	Non	436.9	325.1	325.1	5.45	1651	>sp|P02817|AMELX_BOVIN Amelogenin, X isoform OS=Bos taurus OX=9913 GN=AMELX PE=1 SV=2	1	hf1_10472_ebo_32_1_261219.ScanId;v=1;d1=9245.9245.3	controllerType=0 controllerNumber=1 scan=9245	23.2593
12726:3	1	S.MPLPPHPGHPG.Y			379.529	3	1136.57	1136.57	0	5	17	Non	455.26	434.43	434.43	6.84	1651	>sp|P02817|AMELX_BOVIN Amelogenin, X isoform OS=Bos taurus OX=9913 GN=AMELX PE=1 SV=2	1	hf1_10472_ebo_32_1_261219.ScanId;v=1;d1=10625.10625.3	controllerType=0 controllerNumber=1 scan=10625	25.6797
11562:3	1	S.MPLPPHPGHPG.Y			379.53	3	1136.57	1136.57	0	6.6	17	Non	479.16	405.25	405.25	6.84	1651	>sp|P02817|AMELX_BOVIN Amelogenin, X isoform OS=Bos taurus OX=9913 GN=AMELX PE=1 SV=2	1	hf1_10472_ebo_32_1_261219.ScanId;v=1;d1=9823.9823.3	controllerType=0 controllerNumber=1 scan=9823	24.2926
11292:3	1	S.MPLPPHPGHPG.Y			379.53	3	1136.57	1136.57	0	6.3	17	Non	484.08	388.37	388.37	6.82	1651	>sp|P02817|AMELX_BOVIN Amelogenin, X isoform OS=Bos taurus OX=9913 GN=AMELX PE=1 SV=2	1	hf1_10472_ebo_32_1_261219.ScanId;v=1;d1=9630.9630.3	controllerType=0 controllerNumber=1 scan=9630	23.9463
12426:3	1	S.MPLPPHPGHPG.Y			379.529	3	1136.57	1136.57	0	5.4	17	Non	484.72	400	400	6.82	1651	>sp|P02817|AMELX_BOVIN Amelogenin, X isoform OS=Bos taurus OX=9913 GN=AMELX PE=1 SV=2	1	hf1_10472_ebo_32_1_261219.ScanId;v=1;d1=10425.10425.3	controllerType=0 controllerNumber=1 scan=10425	25.3318
12144:3	1	S.MPLPPHPGHPG.Y			379.529	3	1136.57	1136.57	0	5.2	17	Non	505.18	487.81	487.81	6.82	1651	>sp|P02817|AMELX_BOVIN Amelogenin, X isoform OS=Bos taurus OX=9913 GN=AMELX PE=1 SV=2	1	hf1_10472_ebo_32_1_261219.ScanId;v=1;d1=10227.10227.3	controllerType=0 controllerNumber=1 scan=10227	24.987
11856:3	1	S.MPLPPHPGHPG.Y			379.53	3	1136.57	1136.57	0	6.4	17	Non	519.73	445.42	445.42	6.82	1651	>sp|P02817|AMELX_BOVIN Amelogenin, X isoform OS=Bos taurus OX=9913 GN=AMELX PE=1 SV=2	1	hf1_10472_ebo_32_1_261219.ScanId;v=1;d1=10028.10028.3	controllerType=0 controllerNumber=1 scan=10028	24.6478
11017:3	1	S.MPLPPHPGHPG.Y			379.53	3	1136.57	1136.57	0	6.5	17	Non	526.82	432.53	432.53	6.98	1651	>sp|P02817|AMELX_BOVIN Amelogenin, X isoform OS=Bos taurus OX=9913 GN=AMELX PE=1 SV=2	1	hf1_10472_ebo_32_1_261219.ScanId;v=1;d1=9442.9442.3	controllerType=0 controllerNumber=1 scan=9442	23.6059
12261:2	1	S.MPLPPHPGHPG.Y			568.79	2	1136.57	1136.57	0	5.6	17	Non	625.54	464.67	464.67	8.97	1651	>sp|P02817|AMELX_BOVIN Amelogenin, X isoform OS=Bos taurus OX=9913 GN=AMELX PE=1 SV=2	1	hf1_10472_ebo_32_1_261219.ScanId;v=1;d1=10313.10313.2	controllerType=0 controllerNumber=1 scan=10313	25.1369
11973:2	1	S.MPLPPHPGHPG.Y			568.789	2	1136.57	1136.57	0	3.9	17	Non	645.96	595.68	595.68	8.7	1651	>sp|P02817|AMELX_BOVIN Amelogenin, X isoform OS=Bos taurus OX=9913 GN=AMELX PE=1 SV=2	1	hf1_10472_ebo_32_1_261219.ScanId;v=1;d1=10111.10111.2	controllerType=0 controllerNumber=1 scan=10111	24.7841
10845:2	1	S.MPLPPHPGHPG.Y			568.79	2	1136.57	1136.57	0	5.8	17	Non	654.45	473.43	473.43	9.97	1651	>sp|P02817|AMELX_BOVIN Amelogenin, X isoform OS=Bos taurus OX=9913 GN=AMELX PE=1 SV=2	1	hf1_10472_ebo_32_1_261219.ScanId;v=1;d1=9326.9326.2	controllerType=0 controllerNumber=1 scan=9326	23.4043
11685:2	1	S.MPLPPHPGHPG.Y			568.79	2	1136.57	1136.57	0	5.4	17	Non	656.82	486.51	486.51	9.97	1651	>sp|P02817|AMELX_BOVIN Amelogenin, X isoform OS=Bos taurus OX=9913 GN=AMELX PE=1 SV=2	1	hf1_10472_ebo_32_1_261219.ScanId;v=1;d1=9910.9910.2	controllerType=0 controllerNumber=1 scan=9910	24.4394
11406:2	1	S.MPLPPHPGHPG.Y			568.79	2	1136.57	1136.57	0	4.7	17	Non	662.91	584.07	584.07	9.7	1651	>sp|P02817|AMELX_BOVIN Amelogenin, X isoform OS=Bos taurus OX=9913 GN=AMELX PE=1 SV=2	1	hf1_10472_ebo_32_1_261219.ScanId;v=1;d1=9709.9709.2	controllerType=0 controllerNumber=1 scan=9709	24.089
11410:2	1	S.MPLPPHPGHPG.Y			568.79	2	1136.57	1136.57	0	4.6	17	Non	688.58	634.54	634.54	9.7	1651	>sp|P02817|AMELX_BOVIN Amelogenin, X isoform OS=Bos taurus OX=9913 GN=AMELX PE=1 SV=2	1	hf1_10472_ebo_32_1_261219.ScanId;v=1;d1=9713.9713.2	controllerType=0 controllerNumber=1 scan=9713	24.0969
11136:2	1	S.MPLPPHPGHPG.Y			568.79	2	1136.57	1136.57	0	5	17	Non	696.02	568.42	568.42	9.97	1651	>sp|P02817|AMELX_BOVIN Amelogenin, X isoform OS=Bos taurus OX=9913 GN=AMELX PE=1 SV=2	1	hf1_10472_ebo_32_1_261219.ScanId;v=1;d1=9522.9522.2	controllerType=0 controllerNumber=1 scan=9522	23.7503
00830:3	1	S.MP[+15.995]LPPHPGHPG.Y		P[+16]	384.86	3	1152.57	1152.56	0	3.5	17	Non	92.73	92.73	4	2.29	1651	>sp|P02817|AMELX_BOVIN Amelogenin, X isoform OS=Bos taurus OX=9913 GN=AMELX PE=1 SV=2	1	hf1_10472_ebo_32_1_261219.ScanId;v=1;d1=2259.2259.3	controllerType=0 controllerNumber=1 scan=2259	11.4405
49355:2	1	S.MP[+15.995]LPPHPGHPG.Y		P[+16]	576.786	2	1152.56	1152.56	0	2.6	17	Non	125.15	125.15	4	2.46	1651	>sp|P02817|AMELX_BOVIN Amelogenin, X isoform OS=Bos taurus OX=9913 GN=AMELX PE=1 SV=2	1	hf1_10472_ebo_32_1_261219.ScanId;v=1;d1=35883.35883.2	controllerType=0 controllerNumber=1 scan=35883	72.2216
12380:3	1	S.M[+15.995]PLPPHPGHPG.Y		M[+16]	384.861	3	1152.57	1152.56	0	6.1	17	Non	191.46	184.33	22.03	2.41	1651	>sp|P02817|AMELX_BOVIN Amelogenin, X isoform OS=Bos taurus OX=9913 GN=AMELX PE=1 SV=2	1	hf1_10472_ebo_32_1_261219.ScanId;v=1;d1=10396.10396.3	controllerType=0 controllerNumber=1 scan=10396	25.282
00043:2	1	S.M[+15.995]PLPPHPGHPG.Y		M[+16]	576.788	2	1152.57	1152.56	0	6.1	17	Non	253.42	169.07	14.12	4.5	1651	>sp|P02817|AMELX_BOVIN Amelogenin, X isoform OS=Bos taurus OX=9913 GN=AMELX PE=1 SV=2	1	hf1_10472_ebo_32_1_261219.ScanId;v=1;d1=123.123.2	controllerType=0 controllerNumber=1 scan=123	0.5788
09406:3	1	S.M[+31.990]PLPPHPGHPG.Y		M[+32]	390.192	3	1168.56	1168.56	0	4.8	17	Non	263.28	230.93	8.76	4.65	1651	>sp|P02817|AMELX_BOVIN Amelogenin, X isoform OS=Bos taurus OX=9913 GN=AMELX PE=1 SV=2	1	hf1_10472_ebo_32_1_261219.ScanId;v=1;d1=8318.8318.3	controllerType=0 controllerNumber=1 scan=8318	21.6575
04540:3	1	S.M[+31.990]PLPPHPGHPG.Y		M[+32]	390.192	3	1168.56	1168.56	0	4.7	17	Non	265.56	265.56	0	4.22	1651	>sp|P02817|AMELX_BOVIN Amelogenin, X isoform OS=Bos taurus OX=9913 GN=AMELX PE=1 SV=2	1	hf1_10472_ebo_32_1_261219.ScanId;v=1;d1=4861.4861.3	controllerType=0 controllerNumber=1 scan=4861	15.8167
12083:3	1	S.M[+15.995]PLPPHPGHPG.Y		M[+16]	384.86	3	1152.57	1152.56	0	4.2	17	Non	290	290	21.81	4.59	1651	>sp|P02817|AMELX_BOVIN Amelogenin, X isoform OS=Bos taurus OX=9913 GN=AMELX PE=1 SV=2	1	hf1_10472_ebo_32_1_261219.ScanId;v=1;d1=10184.10184.3	controllerType=0 controllerNumber=1 scan=10184	24.9074
11409:3	1	S.M[+15.995]PLPPHPGHPG.Y		M[+16]	384.86	3	1152.57	1152.56	0	4	17	Non	294.32	189.75	20.13	3.69	1651	>sp|P02817|AMELX_BOVIN Amelogenin, X isoform OS=Bos taurus OX=9913 GN=AMELX PE=1 SV=2	1	hf1_10472_ebo_32_1_261219.ScanId;v=1;d1=9711.9711.3	controllerType=0 controllerNumber=1 scan=9711	24.0912
11692:3	1	S.M[+15.995]PLPPHPGHPG.Y		M[+16]	384.861	3	1152.57	1152.56	0	4.7	17	Non	298.68	246.33	22.45	4.65	1651	>sp|P02817|AMELX_BOVIN Amelogenin, X isoform OS=Bos taurus OX=9913 GN=AMELX PE=1 SV=2	1	hf1_10472_ebo_32_1_261219.ScanId;v=1;d1=9915.9915.3	controllerType=0 controllerNumber=1 scan=9915	24.4489
08495:3	1	S.M[+31.990]PLPPHPGHPG.Y		M[+32]	390.193	3	1168.56	1168.56	0	5.5	17	Non	299.69	271.73	10.57	4.87	1651	>sp|P02817|AMELX_BOVIN Amelogenin, X isoform OS=Bos taurus OX=9913 GN=AMELX PE=1 SV=2	1	hf1_10472_ebo_32_1_261219.ScanId;v=1;d1=7679.7679.3	controllerType=0 controllerNumber=1 scan=7679	20.5642
49924:3	1	S.M[+15.995]PLPPHPGHPG.Y		M[+16]	384.861	3	1152.57	1152.56	0	6.6	17	Non	310.28	273.54	13.21	4.87	1651	>sp|P02817|AMELX_BOVIN Amelogenin, X isoform OS=Bos taurus OX=9913 GN=AMELX PE=1 SV=2	1	hf1_10472_ebo_32_1_261219.ScanId;v=1;d1=36374.36374.3	controllerType=0 controllerNumber=1 scan=36374	73.4167
08005:2	1	S.M[+31.990]PLPPHPGHPG.Y		M[+32]	584.785	2	1168.56	1168.56	0	6	17	Non	322.45	255.25	6.64	5.03	1651	>sp|P02817|AMELX_BOVIN Amelogenin, X isoform OS=Bos taurus OX=9913 GN=AMELX PE=1 SV=2	1	hf1_10472_ebo_32_1_261219.ScanId;v=1;d1=7337.7337.2	controllerType=0 controllerNumber=1 scan=7337	20.002
08882:2	1	S.M[+31.990]PLPPHPGHPG.Y		M[+32]	584.785	2	1168.56	1168.56	0	5.1	17	Non	340.1	244.5	0	5.03	1651	>sp|P02817|AMELX_BOVIN Amelogenin, X isoform OS=Bos taurus OX=9913 GN=AMELX PE=1 SV=2	1	hf1_10472_ebo_32_1_261219.ScanId;v=1;d1=7950.7950.2	controllerType=0 controllerNumber=1 scan=7950	21.0247
09689:3	1	S.MPLPPHPGH[+15.995]PG.Y		H[+16]	384.861	3	1152.57	1152.56	0	5.5	17	Non	348.34	264.12	4.86	5.04	1651	>sp|P02817|AMELX_BOVIN Amelogenin, X isoform OS=Bos taurus OX=9913 GN=AMELX PE=1 SV=2	1	hf1_10472_ebo_32_1_261219.ScanId;v=1;d1=8521.8521.3	controllerType=0 controllerNumber=1 scan=8521	22.0106
11131:3	1	S.MPLPP[+15.995]HPGHPG.Y		P[+16]	384.861	3	1152.57	1152.56	0	4.4	17	Non	355.3	196.99	1.63	4.23	1651	>sp|P02817|AMELX_BOVIN Amelogenin, X isoform OS=Bos taurus OX=9913 GN=AMELX PE=1 SV=2	1	hf1_10472_ebo_32_1_261219.ScanId;v=1;d1=9518.9518.3	controllerType=0 controllerNumber=1 scan=9518	23.7415
00174:2	1	S.M[+15.995]PLPPHPGHPG.Y		M[+16]	576.786	2	1152.57	1152.56	0	3	17	Non	359.97	359.97	40.38	5.82	1651	>sp|P02817|AMELX_BOVIN Amelogenin, X isoform OS=Bos taurus OX=9913 GN=AMELX PE=1 SV=2	1	hf1_10472_ebo_32_1_261219.ScanId;v=1;d1=643.643.2	controllerType=0 controllerNumber=1 scan=643	3.3477
08553:3	1	S.M[+31.990]PLPPHPGHPG.Y		M[+32]	390.193	3	1168.56	1168.56	0	5.9	17	Non	371.57	320.69	12.05	5.37	1651	>sp|P02817|AMELX_BOVIN Amelogenin, X isoform OS=Bos taurus OX=9913 GN=AMELX PE=1 SV=2	1	hf1_10472_ebo_32_1_261219.ScanId;v=1;d1=7721.7721.3	controllerType=0 controllerNumber=1 scan=7721	20.6341
00046:3	1	S.M[+15.995]PLPPHPGHPG.Y		M[+16]	384.861	3	1152.57	1152.56	0	5	17	Non	379.34	363.4	34.73	6.3	1651	>sp|P02817|AMELX_BOVIN Amelogenin, X isoform OS=Bos taurus OX=9913 GN=AMELX PE=1 SV=2	1	hf1_10472_ebo_32_1_261219.ScanId;v=1;d1=125.125.3	controllerType=0 controllerNumber=1 scan=125	0.5818
06270:3	1	S.M[+15.995]PLPPHPGHPG.Y		M[+16]	384.861	3	1152.57	1152.56	0	4.4	17	Non	380.98	348.68	35.72	5.61	1651	>sp|P02817|AMELX_BOVIN Amelogenin, X isoform OS=Bos taurus OX=9913 GN=AMELX PE=1 SV=2	1	hf1_10472_ebo_32_1_261219.ScanId;v=1;d1=6090.6090.3	controllerType=0 controllerNumber=1 scan=6090	17.8629
08317:2	1	S.M[+31.990]PLPPHPGHPG.Y		M[+32]	584.785	2	1168.56	1168.56	0	5.9	17	Non	382.49	285.43	0	5.2	1651	>sp|P02817|AMELX_BOVIN Amelogenin, X isoform OS=Bos taurus OX=9913 GN=AMELX PE=1 SV=2	1	hf1_10472_ebo_32_1_261219.ScanId;v=1;d1=7551.7551.2	controllerType=0 controllerNumber=1 scan=7551	20.3568
10841:3	1	S.MPLPPHPGH[+15.995]PG.Y		H[+16]	384.861	3	1152.57	1152.56	0	5.6	17	Non	387.06	230.99	1.22	4.82	1651	>sp|P02817|AMELX_BOVIN Amelogenin, X isoform OS=Bos taurus OX=9913 GN=AMELX PE=1 SV=2	1	hf1_10472_ebo_32_1_261219.ScanId;v=1;d1=9322.9322.3	controllerType=0 controllerNumber=1 scan=9322	23.3956
10672:2	1	S.MPLPPHPGHP[+15.995]G.Y		P[+16]	576.789	2	1152.57	1152.56	0	7.1	17	Non	390.95	262.23	6.58	4.43	1651	>sp|P02817|AMELX_BOVIN Amelogenin, X isoform OS=Bos taurus OX=9913 GN=AMELX PE=1 SV=2	1	hf1_10472_ebo_32_1_261219.ScanId;v=1;d1=9211.9211.4	controllerType=0 controllerNumber=1 scan=9211	23.2015
10407:2	1	S.MPLPPH[+15.995]PGHPG.Y		H[+16]	576.788	2	1152.57	1152.56	0	6.4	17	Non	396.62	266.89	6.49	5.03	1651	>sp|P02817|AMELX_BOVIN Amelogenin, X isoform OS=Bos taurus OX=9913 GN=AMELX PE=1 SV=2	1	hf1_10472_ebo_32_1_261219.ScanId;v=1;d1=9033.9033.4	controllerType=0 controllerNumber=1 scan=9033	22.8941
09736:2	1	S.MPLPPHPGHP[+15.995]G.Y		P[+16]	576.787	2	1152.57	1152.56	0	4.6	17	Non	396.71	321.86	20.07	5.09	1651	>sp|P02817|AMELX_BOVIN Amelogenin, X isoform OS=Bos taurus OX=9913 GN=AMELX PE=1 SV=2	1	hf1_10472_ebo_32_1_261219.ScanId;v=1;d1=8551.8551.2	controllerType=0 controllerNumber=1 scan=8551	22.0621
09402:3	1	S.M[+15.995]PLPPHPGHPG.Y		M[+16]	384.86	3	1152.57	1152.56	0	4.3	17	Non	397.92	324.04	31.83	5.09	1651	>sp|P02817|AMELX_BOVIN Amelogenin, X isoform OS=Bos taurus OX=9913 GN=AMELX PE=1 SV=2	1	hf1_10472_ebo_32_1_261219.ScanId;v=1;d1=8313.8313.3	controllerType=0 controllerNumber=1 scan=8313	21.6477
09978:3	1	S.MPLPPHPGHP[+15.995]G.Y		P[+16]	384.861	3	1152.57	1152.56	0	5.1	17	Non	400.3	275.6	9.98	5.11	1651	>sp|P02817|AMELX_BOVIN Amelogenin, X isoform OS=Bos taurus OX=9913 GN=AMELX PE=1 SV=2	1	hf1_10472_ebo_32_1_261219.ScanId;v=1;d1=8726.8726.3	controllerType=0 controllerNumber=1 scan=8726	22.36
06262:2	1	S.M[+15.995]PLPPHPGHPG.Y		M[+16]	576.786	2	1152.57	1152.56	0	3.2	17	Non	409.75	396.37	59.43	6.2	1651	>sp|P02817|AMELX_BOVIN Amelogenin, X isoform OS=Bos taurus OX=9913 GN=AMELX PE=1 SV=2	1	hf1_10472_ebo_32_1_261219.ScanId;v=1;d1=6082.6082.2	controllerType=0 controllerNumber=1 scan=6082	17.8454
10539:3	1	S.MPLPPHPGHP[+15.995]G.Y		P[+16]	384.861	3	1152.57	1152.56	0	5.8	17	Non	419.43	311.65	6.68	5.27	1651	>sp|P02817|AMELX_BOVIN Amelogenin, X isoform OS=Bos taurus OX=9913 GN=AMELX PE=1 SV=2	1	hf1_10472_ebo_32_1_261219.ScanId;v=1;d1=9124.9124.3	controllerType=0 controllerNumber=1 scan=9124	23.0526
07369:3	1	S.M[+15.995]PLPPHPGHPG.Y		M[+16]	384.862	3	1152.57	1152.56	0	7.2	17	Non	420.76	380.7	45.03	6.56	1651	>sp|P02817|AMELX_BOVIN Amelogenin, X isoform OS=Bos taurus OX=9913 GN=AMELX PE=1 SV=2	1	hf1_10472_ebo_32_1_261219.ScanId;v=1;d1=6886.6886.3	controllerType=0 controllerNumber=1 scan=6886	19.2352
49992:2	1	S.M[+15.995]PLPPHPGHPG.Y		M[+16]	576.789	2	1152.57	1152.56	0	8.1	17	Non	420.87	304.76	23.91	5.33	1651	>sp|P02817|AMELX_BOVIN Amelogenin, X isoform OS=Bos taurus OX=9913 GN=AMELX PE=1 SV=2	1	hf1_10472_ebo_32_1_261219.ScanId;v=1;d1=36418.36418.2	controllerType=0 controllerNumber=1 scan=36418	73.494
07940:3	1	S.M[+31.990]PLPPHPGHPG.Y		M[+32]	390.193	3	1168.56	1168.56	0	5.6	17	Non	420.9	383.15	16.41	6.32	1651	>sp|P02817|AMELX_BOVIN Amelogenin, X isoform OS=Bos taurus OX=9913 GN=AMELX PE=1 SV=2	1	hf1_10472_ebo_32_1_261219.ScanId;v=1;d1=7293.7293.3	controllerType=0 controllerNumber=1 scan=7293	19.9257
06798:3	1	S.M[+15.995]PLPPHPGHPG.Y		M[+16]	384.861	3	1152.57	1152.56	0	6.6	17	Non	423.54	377.63	33.27	6.78	1651	>sp|P02817|AMELX_BOVIN Amelogenin, X isoform OS=Bos taurus OX=9913 GN=AMELX PE=1 SV=2	1	hf1_10472_ebo_32_1_261219.ScanId;v=1;d1=6482.6482.3	controllerType=0 controllerNumber=1 scan=6482	18.5472
07647:3	1	S.M[+15.995]PLPPHPGHPG.Y		M[+16]	384.862	3	1152.57	1152.56	0	7.2	17	Non	432.76	428.19	33.46	6.56	1651	>sp|P02817|AMELX_BOVIN Amelogenin, X isoform OS=Bos taurus OX=9913 GN=AMELX PE=1 SV=2	1	hf1_10472_ebo_32_1_261219.ScanId;v=1;d1=7086.7086.3	controllerType=0 controllerNumber=1 scan=7086	19.5776
09042:2	1	S.M[+15.995]PLPPHPGHPG.Y		M[+16]	576.787	2	1152.57	1152.56	0	4	17	Non	433.46	420.96	38.45	5.94	1651	>sp|P02817|AMELX_BOVIN Amelogenin, X isoform OS=Bos taurus OX=9913 GN=AMELX PE=1 SV=2	1	hf1_10472_ebo_32_1_261219.ScanId;v=1;d1=8062.8062.2	controllerType=0 controllerNumber=1 scan=8062	21.219
08539:3	1	S.M[+15.995]PLPPHPGHPG.Y		M[+16]	384.861	3	1152.57	1152.56	0	5.8	17	Non	439.09	364.97	35.41	6.78	1651	>sp|P02817|AMELX_BOVIN Amelogenin, X isoform OS=Bos taurus OX=9913 GN=AMELX PE=1 SV=2	1	hf1_10472_ebo_32_1_261219.ScanId;v=1;d1=7710.7710.3	controllerType=0 controllerNumber=1 scan=7710	20.6158
08253:3	1	S.M[+31.990]PLPPHPGHPG.Y		M[+32]	390.193	3	1168.56	1168.56	0	6.5	17	Non	440.94	342.02	15.43	5.45	1651	>sp|P02817|AMELX_BOVIN Amelogenin, X isoform OS=Bos taurus OX=9913 GN=AMELX PE=1 SV=2	1	hf1_10472_ebo_32_1_261219.ScanId;v=1;d1=7505.7505.3	controllerType=0 controllerNumber=1 scan=7505	20.2778
10263:3	1	S.MPLPPHPGHP[+15.995]G.Y		P[+16]	384.861	3	1152.57	1152.56	0	5.7	17	Non	446.13	320.77	8.88	5.51	1651	>sp|P02817|AMELX_BOVIN Amelogenin, X isoform OS=Bos taurus OX=9913 GN=AMELX PE=1 SV=2	1	hf1_10472_ebo_32_1_261219.ScanId;v=1;d1=8928.8928.3	controllerType=0 controllerNumber=1 scan=8928	22.7107
10607:2	1	S.MPLPPHPGHP[+15.995]G.Y		P[+16]	576.788	2	1152.57	1152.56	0	5	17	Non	448.77	326	11.73	5.4	1651	>sp|P02817|AMELX_BOVIN Amelogenin, X isoform OS=Bos taurus OX=9913 GN=AMELX PE=1 SV=2	1	hf1_10472_ebo_32_1_261219.ScanId;v=1;d1=9167.9167.2	controllerType=0 controllerNumber=1 scan=9167	23.1271
08833:3	1	S.M[+15.995]PLPPHPGHPG.Y		M[+16]	384.861	3	1152.57	1152.56	0	4.4	17	Non	450.39	385.44	30.98	6.56	1651	>sp|P02817|AMELX_BOVIN Amelogenin, X isoform OS=Bos taurus OX=9913 GN=AMELX PE=1 SV=2	1	hf1_10472_ebo_32_1_261219.ScanId;v=1;d1=7914.7914.3	controllerType=0 controllerNumber=1 scan=7914	20.9625
09121:3	1	S.M[+15.995]PLPPHPGHPG.Y		M[+16]	384.861	3	1152.57	1152.56	0	4.3	17	Non	461.65	374.15	31.91	6.56	1651	>sp|P02817|AMELX_BOVIN Amelogenin, X isoform OS=Bos taurus OX=9913 GN=AMELX PE=1 SV=2	1	hf1_10472_ebo_32_1_261219.ScanId;v=1;d1=8114.8114.3	controllerType=0 controllerNumber=1 scan=8114	21.3068
06538:3	1	S.M[+15.995]PLPPHPGHPG.Y		M[+16]	384.861	3	1152.57	1152.56	0	5	17	Non	467.26	452.23	50.8	6.84	1651	>sp|P02817|AMELX_BOVIN Amelogenin, X isoform OS=Bos taurus OX=9913 GN=AMELX PE=1 SV=2	1	hf1_10472_ebo_32_1_261219.ScanId;v=1;d1=6284.6284.3	controllerType=0 controllerNumber=1 scan=6284	18.2004
07073:3	1	S.M[+15.995]PLPPHPGHPG.Y		M[+16]	384.861	3	1152.57	1152.56	0	6.7	17	Non	467.29	409.16	56.88	6.84	1651	>sp|P02817|AMELX_BOVIN Amelogenin, X isoform OS=Bos taurus OX=9913 GN=AMELX PE=1 SV=2	1	hf1_10472_ebo_32_1_261219.ScanId;v=1;d1=6677.6677.3	controllerType=0 controllerNumber=1 scan=6677	18.8825
08250:3	1	S.M[+15.995]PLPPHPGHPG.Y		M[+16]	384.861	3	1152.57	1152.56	0	7	17	Non	479.18	422.08	37.65	6.62	1651	>sp|P02817|AMELX_BOVIN Amelogenin, X isoform OS=Bos taurus OX=9913 GN=AMELX PE=1 SV=2	1	hf1_10472_ebo_32_1_261219.ScanId;v=1;d1=7503.7503.3	controllerType=0 controllerNumber=1 scan=7503	20.2759
00157:3	1	S.M[+15.995]PLPPHPGHPG.Y		M[+16]	384.86	3	1152.56	1152.56	0	2.7	17	Non	487.48	414.93	36.92	6.55	1651	>sp|P02817|AMELX_BOVIN Amelogenin, X isoform OS=Bos taurus OX=9913 GN=AMELX PE=1 SV=2	1	hf1_10472_ebo_32_1_261219.ScanId;v=1;d1=629.629.3	controllerType=0 controllerNumber=1 scan=629	3.324
07939:3	1	S.M[+15.995]PLPPHPGHPG.Y		M[+16]	384.861	3	1152.57	1152.56	0	5.3	17	Non	500.28	443.31	57.5	6.82	1651	>sp|P02817|AMELX_BOVIN Amelogenin, X isoform OS=Bos taurus OX=9913 GN=AMELX PE=1 SV=2	1	hf1_10472_ebo_32_1_261219.ScanId;v=1;d1=7292.7292.3	controllerType=0 controllerNumber=1 scan=7292	19.9249
08525:2	1	S.M[+15.995]PLPPHPGHPG.Y		M[+16]	576.788	2	1152.57	1152.56	0	5.6	17	Non	505.33	385.71	63.87	6.53	1651	>sp|P02817|AMELX_BOVIN Amelogenin, X isoform OS=Bos taurus OX=9913 GN=AMELX PE=1 SV=2	1	hf1_10472_ebo_32_1_261219.ScanId;v=1;d1=7700.7700.2	controllerType=0 controllerNumber=1 scan=7700	20.6003
10327:2	1	S.MPLPPHPGHP[+15.995]G.Y		P[+16]	576.788	2	1152.57	1152.56	0	6.1	17	Non	518.63	366.46	55.1	6.53	1651	>sp|P02817|AMELX_BOVIN Amelogenin, X isoform OS=Bos taurus OX=9913 GN=AMELX PE=1 SV=2	1	hf1_10472_ebo_32_1_261219.ScanId;v=1;d1=8973.8973.2	controllerType=0 controllerNumber=1 scan=8973	22.7875
10011:2	1	S.MPLPPHPGHP[+15.995]G.Y		P[+16]	576.788	2	1152.57	1152.56	0	6.1	17	Non	519.43	375.81	19.74	6.58	1651	>sp|P02817|AMELX_BOVIN Amelogenin, X isoform OS=Bos taurus OX=9913 GN=AMELX PE=1 SV=2	1	hf1_10472_ebo_32_1_261219.ScanId;v=1;d1=8752.8752.2	controllerType=0 controllerNumber=1 scan=8752	22.4043
06523:2	1	S.M[+15.995]PLPPHPGHPG.Y		M[+16]	576.787	2	1152.57	1152.56	0	4.1	17	Non	584.37	558.17	82.51	7.7	1651	>sp|P02817|AMELX_BOVIN Amelogenin, X isoform OS=Bos taurus OX=9913 GN=AMELX PE=1 SV=2	1	hf1_10472_ebo_32_1_261219.ScanId;v=1;d1=6273.6273.2	controllerType=0 controllerNumber=1 scan=6273	18.1842
08235:2	1	S.M[+15.995]PLPPHPGHPG.Y		M[+16]	576.788	2	1152.57	1152.56	0	6.7	17	Non	604.06	494.11	75.57	8.97	1651	>sp|P02817|AMELX_BOVIN Amelogenin, X isoform OS=Bos taurus OX=9913 GN=AMELX PE=1 SV=2	1	hf1_10472_ebo_32_1_261219.ScanId;v=1;d1=7492.7492.2	controllerType=0 controllerNumber=1 scan=7492	20.2567
07641:2	1	S.M[+15.995]PLPPHPGHPG.Y		M[+16]	576.788	2	1152.57	1152.56	0	5.9	17	Non	621.42	519.68	102.15	8.97	1651	>sp|P02817|AMELX_BOVIN Amelogenin, X isoform OS=Bos taurus OX=9913 GN=AMELX PE=1 SV=2	1	hf1_10472_ebo_32_1_261219.ScanId;v=1;d1=7080.7080.2	controllerType=0 controllerNumber=1 scan=7080	19.5673
07922:2	1	S.M[+15.995]PLPPHPGHPG.Y		M[+16]	576.787	2	1152.57	1152.56	0	4.8	17	Non	630.11	547.36	93.07	8.97	1651	>sp|P02817|AMELX_BOVIN Amelogenin, X isoform OS=Bos taurus OX=9913 GN=AMELX PE=1 SV=2	1	hf1_10472_ebo_32_1_261219.ScanId;v=1;d1=7281.7281.2	controllerType=0 controllerNumber=1 scan=7281	19.9057
06782:2	1	S.M[+15.995]PLPPHPGHPG.Y		M[+16]	576.788	2	1152.57	1152.56	0	5.2	17	Non	640.81	522.45	104.03	8.97	1651	>sp|P02817|AMELX_BOVIN Amelogenin, X isoform OS=Bos taurus OX=9913 GN=AMELX PE=1 SV=2	1	hf1_10472_ebo_32_1_261219.ScanId;v=1;d1=6471.6471.2	controllerType=0 controllerNumber=1 scan=6471	18.5304
07065:2	1	S.M[+15.995]PLPPHPGHPG.Y		M[+16]	576.788	2	1152.57	1152.56	0	5.2	17	Non	646.87	524.63	110.94	8.97	1651	>sp|P02817|AMELX_BOVIN Amelogenin, X isoform OS=Bos taurus OX=9913 GN=AMELX PE=1 SV=2	1	hf1_10472_ebo_32_1_261219.ScanId;v=1;d1=6671.6671.2	controllerType=0 controllerNumber=1 scan=6671	18.8691
07355:2	1	S.M[+15.995]PLPPHPGHPG.Y		M[+16]	576.788	2	1152.57	1152.56	0	5.5	17	Non	653.41	535.77	105.37	9.97	1651	>sp|P02817|AMELX_BOVIN Amelogenin, X isoform OS=Bos taurus OX=9913 GN=AMELX PE=1 SV=2	1	hf1_10472_ebo_32_1_261219.ScanId;v=1;d1=6875.6875.2	controllerType=0 controllerNumber=1 scan=6875	19.2174
07114:2	1	S.M[+15.995]PLPPHPGH[+15.995]PG.Y		H[+16], M[+16]	584.785	2	1168.56	1168.56	0	5.4	17	Non	163.7	132.17	4.03	2.29	1651	>sp|P02817|AMELX_BOVIN Amelogenin, X isoform OS=Bos taurus OX=9913 GN=AMELX PE=1 SV=2	1	hf1_10472_ebo_32_1_261219.ScanId;v=1;d1=6707.6707.2	controllerType=0 controllerNumber=1 scan=6707	18.9321
05966:3	1	S.MP[+15.995]LPP[+31.990]HPGHPG.Y		P[+16][+32]	395.524	3	1184.56	1184.55	0	4.4	17	Non	176.09	174.46	3.54	2.34	1651	>sp|P02817|AMELX_BOVIN Amelogenin, X isoform OS=Bos taurus OX=9913 GN=AMELX PE=1 SV=2	1	hf1_10472_ebo_32_1_261219.ScanId;v=1;d1=5874.5874.3	controllerType=0 controllerNumber=1 scan=5874	17.5009
10495:2	1	S.M[+15.995]PLPPHP[+15.995]GHPG.Y		M[+16], P[+16]	584.787	2	1168.57	1168.56	0	7.7	17	Non	211.51	106.62	1.42	0.96	1651	>sp|P02817|AMELX_BOVIN Amelogenin, X isoform OS=Bos taurus OX=9913 GN=AMELX PE=1 SV=2	1	hf1_10472_ebo_32_1_261219.ScanId;v=1;d1=9094.9094.2	controllerType=0 controllerNumber=1 scan=9094	22.9986
07079:3	1	S.M[+15.995]PLPPHPGH[+15.995]PG.Y		H[+16], M[+16]	390.192	3	1168.56	1168.56	0	5	17	Non	233.1	166.1	2.96	2.81	1651	>sp|P02817|AMELX_BOVIN Amelogenin, X isoform OS=Bos taurus OX=9913 GN=AMELX PE=1 SV=2	1	hf1_10472_ebo_32_1_261219.ScanId;v=1;d1=6681.6681.3	controllerType=0 controllerNumber=1 scan=6681	18.8899
06109:3	1	S.M[+15.995]PLPPHPGHP[+15.995]G.Y		M[+16], P[+16]	390.193	3	1168.57	1168.56	0	7.9	17	Non	238.8	238.8	3.65	3.25	1651	>sp|P02817|AMELX_BOVIN Amelogenin, X isoform OS=Bos taurus OX=9913 GN=AMELX PE=1 SV=2	1	hf1_10472_ebo_32_1_261219.ScanId;v=1;d1=5974.5974.2	controllerType=0 controllerNumber=1 scan=5974	17.6728
11013:2	1	S.M[+15.995]PLPP[+15.995]HPGHPG.Y		M[+16], P[+16]	584.785	2	1168.56	1168.56	0	6	17	Non	241.17	149.82	0	2.62	1651	>sp|P02817|AMELX_BOVIN Amelogenin, X isoform OS=Bos taurus OX=9913 GN=AMELX PE=1 SV=2	1	hf1_10472_ebo_32_1_261219.ScanId;v=1;d1=9438.9438.2	controllerType=0 controllerNumber=1 scan=9438	23.5972
07370:3	1	S.M[+15.995]PLP[+15.995]PHPGHPG.Y		M[+16], P[+16]	390.192	3	1168.56	1168.56	0	5.1	17	Non	248.86	173.57	19.13	4.29	1651	>sp|P02817|AMELX_BOVIN Amelogenin, X isoform OS=Bos taurus OX=9913 GN=AMELX PE=1 SV=2	1	hf1_10472_ebo_32_1_261219.ScanId;v=1;d1=6887.6887.3	controllerType=0 controllerNumber=1 scan=6887	19.2366
06505:3	1	S.M[+15.995]PLPPHPGHP[+15.995]G.Y		M[+16], P[+16]	390.191	3	1168.56	1168.56	0	2.4	17	Non	257.06	213.77	0.42	4.38	1651	>sp|P02817|AMELX_BOVIN Amelogenin, X isoform OS=Bos taurus OX=9913 GN=AMELX PE=1 SV=2	1	hf1_10472_ebo_32_1_261219.ScanId;v=1;d1=6259.6259.3	controllerType=0 controllerNumber=1 scan=6259	18.1589
06340:2	1	S.M[+15.995]PLPPHPGHP[+15.995]G.Y		M[+16], P[+16]	584.784	2	1168.56	1168.56	0	3.9	17	Non	270.63	270.63	2.45	4.54	1651	>sp|P02817|AMELX_BOVIN Amelogenin, X isoform OS=Bos taurus OX=9913 GN=AMELX PE=1 SV=2	1	hf1_10472_ebo_32_1_261219.ScanId;v=1;d1=6140.6140.2	controllerType=0 controllerNumber=1 scan=6140	17.9424
06511:2	1	S.M[+15.995]PLPPHPGHP[+15.995]G.Y		M[+16], P[+16]	584.784	2	1168.56	1168.56	0	2.8	17	Non	283.13	283.13	3.77	4.42	1651	>sp|P02817|AMELX_BOVIN Amelogenin, X isoform OS=Bos taurus OX=9913 GN=AMELX PE=1 SV=2	1	hf1_10472_ebo_32_1_261219.ScanId;v=1;d1=6263.6263.3	controllerType=0 controllerNumber=1 scan=6263	18.1642
06761:3	1	S.M[+15.995]PLPPHPGHP[+15.995]G.Y		M[+16], P[+16]	390.192	3	1168.56	1168.56	0	4.6	17	Non	302.91	257.84	2.54	4.33	1651	>sp|P02817|AMELX_BOVIN Amelogenin, X isoform OS=Bos taurus OX=9913 GN=AMELX PE=1 SV=2	1	hf1_10472_ebo_32_1_261219.ScanId;v=1;d1=6453.6453.3	controllerType=0 controllerNumber=1 scan=6453	18.4987
06602:2	1	S.M[+15.995]PLPPHPGHP[+15.995]G.Y		M[+16], P[+16]	584.785	2	1168.56	1168.56	0	4.8	17	Non	303.88	231.2	34.06	4.92	1651	>sp|P02817|AMELX_BOVIN Amelogenin, X isoform OS=Bos taurus OX=9913 GN=AMELX PE=1 SV=2	1	hf1_10472_ebo_32_1_261219.ScanId;v=1;d1=6338.6338.2	controllerType=0 controllerNumber=1 scan=6338	18.2969
04842:3	1	S.M[+15.995]P[+15.995]LPPHPGHPG.Y		M[+16], P[+16]	390.192	3	1168.56	1168.56	0	5	17	Non	304.19	251.77	10.27	4.65	1651	>sp|P02817|AMELX_BOVIN Amelogenin, X isoform OS=Bos taurus OX=9913 GN=AMELX PE=1 SV=2	1	hf1_10472_ebo_32_1_261219.ScanId;v=1;d1=5072.5072.3	controllerType=0 controllerNumber=1 scan=5072	16.1612
05325:2	1	S.M[+15.995]PLPPHPGHP[+15.995]G.Y		M[+16], P[+16]	584.785	2	1168.56	1168.56	0	5.9	17	Non	375.02	275.4	58.54	4.99	1651	>sp|P02817|AMELX_BOVIN Amelogenin, X isoform OS=Bos taurus OX=9913 GN=AMELX PE=1 SV=2	1	hf1_10472_ebo_32_1_261219.ScanId;v=1;d1=5414.5414.2	controllerType=0 controllerNumber=1 scan=5414	16.7245
05693:3	1	S.M[+15.995]PLPPHPGHP[+15.995]G.Y		M[+16], P[+16]	390.193	3	1168.56	1168.56	0	5.6	17	Non	387.62	342.33	13.22	5.37	1651	>sp|P02817|AMELX_BOVIN Amelogenin, X isoform OS=Bos taurus OX=9913 GN=AMELX PE=1 SV=2	1	hf1_10472_ebo_32_1_261219.ScanId;v=1;d1=5667.5667.3	controllerType=0 controllerNumber=1 scan=5667	17.1419
05860:2	1	S.M[+15.995]PLPPHPGHP[+15.995]G.Y		M[+16], P[+16]	584.785	2	1168.56	1168.56	0	4.9	17	Non	397.12	305.44	47.7	5.2	1651	>sp|P02817|AMELX_BOVIN Amelogenin, X isoform OS=Bos taurus OX=9913 GN=AMELX PE=1 SV=2	1	hf1_10472_ebo_32_1_261219.ScanId;v=1;d1=5795.5795.2	controllerType=0 controllerNumber=1 scan=5795	17.3555
05243:2	1	S.M[+15.995]PLPPHPGHP[+15.995]G.Y		M[+16], P[+16]	584.784	2	1168.56	1168.56	0	4.2	17	Non	422.52	422.52	65.67	5.94	1651	>sp|P02817|AMELX_BOVIN Amelogenin, X isoform OS=Bos taurus OX=9913 GN=AMELX PE=1 SV=2	1	hf1_10472_ebo_32_1_261219.ScanId;v=1;d1=5359.5359.3	controllerType=0 controllerNumber=1 scan=5359	16.6306
05959:3	1	S.M[+15.995]PLPPHPGHP[+15.995]G.Y		M[+16], P[+16]	390.192	3	1168.56	1168.56	0	4.6	17	Non	422.59	422.59	11.81	6.05	1651	>sp|P02817|AMELX_BOVIN Amelogenin, X isoform OS=Bos taurus OX=9913 GN=AMELX PE=1 SV=2	1	hf1_10472_ebo_32_1_261219.ScanId;v=1;d1=5869.5869.3	controllerType=0 controllerNumber=1 scan=5869	17.4913
05623:2	1	S.M[+15.995]PLPPHPGHP[+15.995]G.Y		M[+16], P[+16]	584.785	2	1168.56	1168.56	0	5.6	17	Non	482.48	342.49	65.26	5.71	1651	>sp|P02817|AMELX_BOVIN Amelogenin, X isoform OS=Bos taurus OX=9913 GN=AMELX PE=1 SV=2	1	hf1_10472_ebo_32_1_261219.ScanId;v=1;d1=5619.5619.2	controllerType=0 controllerNumber=1 scan=5619	17.0654
15536:3	1	S.MPLPPHPGHPGY.I			433.884	3	1299.64	1299.63	0	4.4	17	Non	210.76	190.88	190.88	2.63	1651	>sp|P02817|AMELX_BOVIN Amelogenin, X isoform OS=Bos taurus OX=9913 GN=AMELX PE=1 SV=2	1	hf1_10472_ebo_32_1_261219.ScanId;v=1;d1=12513.12513.3	controllerType=0 controllerNumber=1 scan=12513	28.9952
13698:2	1	S.MPLPPHPGHPGY.I			650.322	2	1299.64	1299.63	0	4.4	17	Non	343.29	238.32	238.32	4.81	1651	>sp|P02817|AMELX_BOVIN Amelogenin, X isoform OS=Bos taurus OX=9913 GN=AMELX PE=1 SV=2	1	hf1_10472_ebo_32_1_261219.ScanId;v=1;d1=11277.11277.2	controllerType=0 controllerNumber=1 scan=11277	26.8211
15099:3	1	S.MPLPPHPGHPGY.I			433.884	3	1299.64	1299.63	0	5.5	17	Non	366.84	285.81	285.81	5.03	1651	>sp|P02817|AMELX_BOVIN Amelogenin, X isoform OS=Bos taurus OX=9913 GN=AMELX PE=1 SV=2	1	hf1_10472_ebo_32_1_261219.ScanId;v=1;d1=12226.12226.3	controllerType=0 controllerNumber=1 scan=12226	28.5008
15107:3	1	S.MPLPPHPGHPGY.I			433.884	3	1299.64	1299.63	0	5.5	17	Non	369.32	285.79	285.79	4.99	1651	>sp|P02817|AMELX_BOVIN Amelogenin, X isoform OS=Bos taurus OX=9913 GN=AMELX PE=1 SV=2	1	hf1_10472_ebo_32_1_261219.ScanId;v=1;d1=12230.12230.3	controllerType=0 controllerNumber=1 scan=12230	28.506
14150:2	1	S.MPLPPHPGHPGY.I			650.322	2	1299.64	1299.63	0	4.4	17	Non	397.22	303.02	303.02	4.92	1651	>sp|P02817|AMELX_BOVIN Amelogenin, X isoform OS=Bos taurus OX=9913 GN=AMELX PE=1 SV=2	1	hf1_10472_ebo_32_1_261219.ScanId;v=1;d1=11591.11591.2	controllerType=0 controllerNumber=1 scan=11591	27.3792
13645:3	1	S.MPLPPHPGHPGY.I			433.884	3	1299.64	1299.63	0	5	17	Non	419.72	297.94	297.94	5.27	1651	>sp|P02817|AMELX_BOVIN Amelogenin, X isoform OS=Bos taurus OX=9913 GN=AMELX PE=1 SV=2	1	hf1_10472_ebo_32_1_261219.ScanId;v=1;d1=11243.11243.3	controllerType=0 controllerNumber=1 scan=11243	26.7632
15406:3	1	S.MPLPPHPGHPGY.I			433.884	3	1299.64	1299.63	0	5.9	17	Non	423.02	294.48	294.48	5.27	1651	>sp|P02817|AMELX_BOVIN Amelogenin, X isoform OS=Bos taurus OX=9913 GN=AMELX PE=1 SV=2	1	hf1_10472_ebo_32_1_261219.ScanId;v=1;d1=12424.12424.3	controllerType=0 controllerNumber=1 scan=12424	28.8458
13666:2	1	S.MPLPPHPGHPGY.I			650.322	2	1299.64	1299.63	0	5.4	17	Non	488.49	333.37	333.37	5.38	1651	>sp|P02817|AMELX_BOVIN Amelogenin, X isoform OS=Bos taurus OX=9913 GN=AMELX PE=1 SV=2	1	hf1_10472_ebo_32_1_261219.ScanId;v=1;d1=11256.11256.2	controllerType=0 controllerNumber=1 scan=11256	26.7846
14507:3	1	S.MPLPPHPGHPGY.I			433.884	3	1299.64	1299.63	0	5.2	17	Non	494.19	355.89	355.89	5.49	1651	>sp|P02817|AMELX_BOVIN Amelogenin, X isoform OS=Bos taurus OX=9913 GN=AMELX PE=1 SV=2	1	hf1_10472_ebo_32_1_261219.ScanId;v=1;d1=11832.11832.3	controllerType=0 controllerNumber=1 scan=11832	27.8097
14216:3	1	S.MPLPPHPGHPGY.I			433.884	3	1299.64	1299.63	0	4.7	17	Non	500.34	382.94	382.94	6.37	1651	>sp|P02817|AMELX_BOVIN Amelogenin, X isoform OS=Bos taurus OX=9913 GN=AMELX PE=1 SV=2	1	hf1_10472_ebo_32_1_261219.ScanId;v=1;d1=11636.11636.3	controllerType=0 controllerNumber=1 scan=11636	27.4609
13940:3	1	S.MPLPPHPGHPGY.I			433.884	3	1299.64	1299.63	0	4.7	17	Non	509.98	403.18	403.18	6.82	1651	>sp|P02817|AMELX_BOVIN Amelogenin, X isoform OS=Bos taurus OX=9913 GN=AMELX PE=1 SV=2	1	hf1_10472_ebo_32_1_261219.ScanId;v=1;d1=11440.11440.3	controllerType=0 controllerNumber=1 scan=11440	27.1072
14796:3	1	S.MPLPPHPGHPGY.I			433.884	3	1299.64	1299.63	0	5.8	17	Non	544.81	386.61	386.61	6.98	1651	>sp|P02817|AMELX_BOVIN Amelogenin, X isoform OS=Bos taurus OX=9913 GN=AMELX PE=1 SV=2	1	hf1_10472_ebo_32_1_261219.ScanId;v=1;d1=12032.12032.3	controllerType=0 controllerNumber=1 scan=12032	28.1627
14854:2	1	S.MPLPPHPGHPGY.I			650.324	2	1299.64	1299.63	0	8	17	Non	612.78	428.43	428.43	8.3	1651	>sp|P02817|AMELX_BOVIN Amelogenin, X isoform OS=Bos taurus OX=9913 GN=AMELX PE=1 SV=2	1	hf1_10472_ebo_32_1_261219.ScanId;v=1;d1=12067.12067.2	controllerType=0 controllerNumber=1 scan=12067	28.2219
14267:2	1	S.MPLPPHPGHPGY.I			650.322	2	1299.64	1299.63	0	5.1	17	Non	635.55	466.79	466.79	8.52	1651	>sp|P02817|AMELX_BOVIN Amelogenin, X isoform OS=Bos taurus OX=9913 GN=AMELX PE=1 SV=2	1	hf1_10472_ebo_32_1_261219.ScanId;v=1;d1=11673.11673.2	controllerType=0 controllerNumber=1 scan=11673	27.5259
13961:2	1	S.MPLPPHPGHPGY.I			650.322	2	1299.64	1299.63	0	5.5	17	Non	661.26	471.72	471.72	9.97	1651	>sp|P02817|AMELX_BOVIN Amelogenin, X isoform OS=Bos taurus OX=9913 GN=AMELX PE=1 SV=2	1	hf1_10472_ebo_32_1_261219.ScanId;v=1;d1=11456.11456.2	controllerType=0 controllerNumber=1 scan=11456	27.1362
14555:2	1	S.MPLPPHPGHPGY.I			650.321	2	1299.64	1299.63	0	3.8	17	Non	677.29	509.36	509.36	9.24	1651	>sp|P02817|AMELX_BOVIN Amelogenin, X isoform OS=Bos taurus OX=9913 GN=AMELX PE=1 SV=2	1	hf1_10472_ebo_32_1_261219.ScanId;v=1;d1=11865.11865.2	controllerType=0 controllerNumber=1 scan=11865	27.8709
12331:3	1	S.M[+15.995]PLPPHPGHPGY.I		M[+16]	439.217	3	1315.64	1315.63	0	9.3	17	Non	216.24	159.67	17.34	2.32	1651	>sp|P02817|AMELX_BOVIN Amelogenin, X isoform OS=Bos taurus OX=9913 GN=AMELX PE=1 SV=2	1	hf1_10472_ebo_32_1_261219.ScanId;v=1;d1=10364.10364.2	controllerType=0 controllerNumber=1 scan=10364	25.2277
13498:3	1	S.MPLPPHPGHP[+15.995]GY.I		P[+16]	439.216	3	1315.63	1315.63	0	5.4	17	Non	225.53	182.25	4.06	2.41	1651	>sp|P02817|AMELX_BOVIN Amelogenin, X isoform OS=Bos taurus OX=9913 GN=AMELX PE=1 SV=2	1	hf1_10472_ebo_32_1_261219.ScanId;v=1;d1=11142.11142.3	controllerType=0 controllerNumber=1 scan=11142	26.5897
12636:3	1	S.MPLPPHP[+15.995]GHPGY.I		P[+16]	439.217	3	1315.64	1315.63	0	8.7	17	Non	251.79	156.69	4.55	3.16	1651	>sp|P02817|AMELX_BOVIN Amelogenin, X isoform OS=Bos taurus OX=9913 GN=AMELX PE=1 SV=2	1	hf1_10472_ebo_32_1_261219.ScanId;v=1;d1=10566.10566.3	controllerType=0 controllerNumber=1 scan=10566	25.5787
13721:3	1	S.MPLPPHPGHP[+15.995]GY.I		P[+16]	439.216	3	1315.63	1315.63	0	5	17	Non	252.45	234.8	4.52	4.27	1651	>sp|P02817|AMELX_BOVIN Amelogenin, X isoform OS=Bos taurus OX=9913 GN=AMELX PE=1 SV=2	1	hf1_10472_ebo_32_1_261219.ScanId;v=1;d1=11294.11294.3	controllerType=0 controllerNumber=1 scan=11294	26.852
11654:3	1	S.MP[+31.990]LPPHPGHPGY.I		P[+32]	444.547	3	1331.63	1331.62	0	5.3	17	Non	299.8	275.96	1.6	4.65	1651	>sp|P02817|AMELX_BOVIN Amelogenin, X isoform OS=Bos taurus OX=9913 GN=AMELX PE=1 SV=2	1	hf1_10472_ebo_32_1_261219.ScanId;v=1;d1=9886.9886.3	controllerType=0 controllerNumber=1 scan=9886	24.3959
11359:3	1	S.M[+31.990]PLPPHPGHPGY.I		M[+32]	444.547	3	1331.63	1331.62	0	4.1	17	Non	301.92	285.48	6.86	4.59	1651	>sp|P02817|AMELX_BOVIN Amelogenin, X isoform OS=Bos taurus OX=9913 GN=AMELX PE=1 SV=2	1	hf1_10472_ebo_32_1_261219.ScanId;v=1;d1=9676.9676.3	controllerType=0 controllerNumber=1 scan=9676	24.0293
49993:3	1	S.M[+15.995]PLPPHPGHPGY.I		M[+16]	439.217	3	1315.64	1315.63	0	8.6	17	Non	350.71	328.19	26.6	5.21	1651	>sp|P02817|AMELX_BOVIN Amelogenin, X isoform OS=Bos taurus OX=9913 GN=AMELX PE=1 SV=2	1	hf1_10472_ebo_32_1_261219.ScanId;v=1;d1=36419.36419.3	controllerType=0 controllerNumber=1 scan=36419	73.4954
12940:3	1	S.MPLPPHPGHP[+15.995]GY.I		P[+16]	439.216	3	1315.63	1315.63	0	6	17	Non	383.95	264.07	16.87	4.77	1651	>sp|P02817|AMELX_BOVIN Amelogenin, X isoform OS=Bos taurus OX=9913 GN=AMELX PE=1 SV=2	1	hf1_10472_ebo_32_1_261219.ScanId;v=1;d1=10766.10766.3	controllerType=0 controllerNumber=1 scan=10766	25.9252
09721:2	1	S.M[+15.995]PLPPHPGHPGY.I		M[+16]	658.319	2	1315.63	1315.63	0	3.7	17	Non	444.14	353.31	62.22	5.12	1651	>sp|P02817|AMELX_BOVIN Amelogenin, X isoform OS=Bos taurus OX=9913 GN=AMELX PE=1 SV=2	1	hf1_10472_ebo_32_1_261219.ScanId;v=1;d1=8542.8542.2	controllerType=0 controllerNumber=1 scan=8542	22.046
10697:3	1	S.M[+15.995]PLPPHPGHPGY.I		M[+16]	439.217	3	1315.64	1315.63	0	7.5	17	Non	471.78	409.03	32.21	6.62	1651	>sp|P02817|AMELX_BOVIN Amelogenin, X isoform OS=Bos taurus OX=9913 GN=AMELX PE=1 SV=2	1	hf1_10472_ebo_32_1_261219.ScanId;v=1;d1=9226.9226.3	controllerType=0 controllerNumber=1 scan=9226	23.2291
11431:2	1	S.M[+15.995]PLPPHPGHPGY.I		M[+16]	658.32	2	1315.63	1315.63	0	5.5	17	Non	497.68	375.65	58.05	6.26	1651	>sp|P02817|AMELX_BOVIN Amelogenin, X isoform OS=Bos taurus OX=9913 GN=AMELX PE=1 SV=2	1	hf1_10472_ebo_32_1_261219.ScanId;v=1;d1=9727.9727.2	controllerType=0 controllerNumber=1 scan=9727	24.1206
09997:2	1	S.M[+15.995]PLPPHPGHPGY.I		M[+16]	658.319	2	1315.63	1315.63	0	4.7	17	Non	520.35	378.61	77.71	6.92	1651	>sp|P02817|AMELX_BOVIN Amelogenin, X isoform OS=Bos taurus OX=9913 GN=AMELX PE=1 SV=2	1	hf1_10472_ebo_32_1_261219.ScanId;v=1;d1=8742.8742.2	controllerType=0 controllerNumber=1 scan=8742	22.3881
11152:2	1	S.M[+15.995]PLPPHPGHPGY.I		M[+16]	658.322	2	1315.64	1315.63	0	9.1	17	Non	522.27	359.66	49.28	5.32	1651	>sp|P02817|AMELX_BOVIN Amelogenin, X isoform OS=Bos taurus OX=9913 GN=AMELX PE=1 SV=2	1	hf1_10472_ebo_32_1_261219.ScanId;v=1;d1=9532.9532.2	controllerType=0 controllerNumber=1 scan=9532	23.7676
09855:3	1	S.M[+15.995]PLPPHPGHPGY.I		M[+16]	439.216	3	1315.63	1315.63	0	5.6	17	Non	533.02	455.26	30.03	6.98	1651	>sp|P02817|AMELX_BOVIN Amelogenin, X isoform OS=Bos taurus OX=9913 GN=AMELX PE=1 SV=2	1	hf1_10472_ebo_32_1_261219.ScanId;v=1;d1=8634.8634.3	controllerType=0 controllerNumber=1 scan=8634	22.2012
10133:3	1	S.M[+15.995]PLPPHPGHPGY.I		M[+16]	439.216	3	1315.63	1315.63	0	5.4	17	Non	533.85	456.1	32.53	6.98	1651	>sp|P02817|AMELX_BOVIN Amelogenin, X isoform OS=Bos taurus OX=9913 GN=AMELX PE=1 SV=2	1	hf1_10472_ebo_32_1_261219.ScanId;v=1;d1=8833.8833.3	controllerType=0 controllerNumber=1 scan=8833	22.5431
10398:3	1	S.M[+15.995]PLPPHPGHPGY.I		M[+16]	439.216	3	1315.63	1315.63	0	6.3	17	Non	541.37	465.95	30.4	6.98	1651	>sp|P02817|AMELX_BOVIN Amelogenin, X isoform OS=Bos taurus OX=9913 GN=AMELX PE=1 SV=2	1	hf1_10472_ebo_32_1_261219.ScanId;v=1;d1=9027.9027.3	controllerType=0 controllerNumber=1 scan=9027	22.8854
10280:2	1	S.M[+15.995]PLPPHPGHPGY.I		M[+16]	658.32	2	1315.63	1315.63	0	5.2	17	Non	610.09	450.92	62.28	8.97	1651	>sp|P02817|AMELX_BOVIN Amelogenin, X isoform OS=Bos taurus OX=9913 GN=AMELX PE=1 SV=2	1	hf1_10472_ebo_32_1_261219.ScanId;v=1;d1=8939.8939.2	controllerType=0 controllerNumber=1 scan=8939	22.7296
10554:2	1	S.M[+15.995]PLPPHPGHPGY.I		M[+16]	658.32	2	1315.63	1315.63	0	5.4	17	Non	633.98	463.74	87.94	8.52	1651	>sp|P02817|AMELX_BOVIN Amelogenin, X isoform OS=Bos taurus OX=9913 GN=AMELX PE=1 SV=2	1	hf1_10472_ebo_32_1_261219.ScanId;v=1;d1=9134.9134.2	controllerType=0 controllerNumber=1 scan=9134	23.0704
10867:2	1	S.M[+15.995]PLPPHPGHPGY.I		M[+16]	658.319	2	1315.63	1315.63	0	4.6	17	Non	648.86	482.1	91.29	8.24	1651	>sp|P02817|AMELX_BOVIN Amelogenin, X isoform OS=Bos taurus OX=9913 GN=AMELX PE=1 SV=2	1	hf1_10472_ebo_32_1_261219.ScanId;v=1;d1=9341.9341.2	controllerType=0 controllerNumber=1 scan=9341	23.4288
09749:3	1	S.M[+15.995]PLPPHPGH[+15.995]PGY.I		H[+16], M[+16]	444.547	3	1331.63	1331.62	0	5.5	17	Non	231.92	182.94	0.84	2.81	1651	>sp|P02817|AMELX_BOVIN Amelogenin, X isoform OS=Bos taurus OX=9913 GN=AMELX PE=1 SV=2	1	hf1_10472_ebo_32_1_261219.ScanId;v=1;d1=8561.8561.3	controllerType=0 controllerNumber=1 scan=8561	22.0792
08651:3	1	S.M[+15.995]PLPPHPGHP[+15.995]GY.I		M[+16], P[+16]	444.547	3	1331.63	1331.62	0	5.6	17	Non	233.87	210	3.84	3.1	1651	>sp|P02817|AMELX_BOVIN Amelogenin, X isoform OS=Bos taurus OX=9913 GN=AMELX PE=1 SV=2	1	hf1_10472_ebo_32_1_261219.ScanId;v=1;d1=7785.7785.3	controllerType=0 controllerNumber=1 scan=7785	20.7405
09308:3	1	S.M[+15.995]PLPPHPGHP[+15.995]GY.I		M[+16], P[+16]	444.547	3	1331.63	1331.62	0	4.4	17	Non	338.86	321.83	7	4.83	1651	>sp|P02817|AMELX_BOVIN Amelogenin, X isoform OS=Bos taurus OX=9913 GN=AMELX PE=1 SV=2	1	hf1_10472_ebo_32_1_261219.ScanId;v=1;d1=8244.8244.3	controllerType=0 controllerNumber=1 scan=8244	21.5279
14208:2	1	S.M[+15.995]PLPPHPGHPGYI.N		M[+16]	714.859	2	1428.71	1428.71	0	0.9	17	Non	219.08	199.08	18.12	2.5	1651	>sp|P02817|AMELX_BOVIN Amelogenin, X isoform OS=Bos taurus OX=9913 GN=AMELX PE=1 SV=2	1	hf1_10472_ebo_32_1_261219.ScanId;v=1;d1=11631.11631.4	controllerType=0 controllerNumber=1 scan=11631	27.451
15263:3	1	S.M[+15.995]PLPPHPGHPGYI.N		M[+16]	476.911	3	1428.72	1428.71	0	7.1	17	Non	390.71	325.86	12.25	4.89	1651	>sp|P02817|AMELX_BOVIN Amelogenin, X isoform OS=Bos taurus OX=9913 GN=AMELX PE=1 SV=2	1	hf1_10472_ebo_32_1_261219.ScanId;v=1;d1=12333.12333.3	controllerType=0 controllerNumber=1 scan=12333	28.688
14967:3	1	S.M[+15.995]PLPPHPGHPGYI.N		M[+16]	476.911	3	1428.72	1428.71	0	5.6	17	Non	415.89	336.77	25.49	5.12	1651	>sp|P02817|AMELX_BOVIN Amelogenin, X isoform OS=Bos taurus OX=9913 GN=AMELX PE=1 SV=2	1	hf1_10472_ebo_32_1_261219.ScanId;v=1;d1=12138.12138.3	controllerType=0 controllerNumber=1 scan=12138	28.3461
14373:3	1	S.M[+15.995]PLPPHPGHPGYI.N		M[+16]	476.911	3	1428.72	1428.71	0	5.3	17	Non	481.07	385.32	27.36	6.31	1651	>sp|P02817|AMELX_BOVIN Amelogenin, X isoform OS=Bos taurus OX=9913 GN=AMELX PE=1 SV=2	1	hf1_10472_ebo_32_1_261219.ScanId;v=1;d1=11744.11744.3	controllerType=0 controllerNumber=1 scan=11744	27.6528
14663:3	1	S.M[+15.995]PLPPHPGHPGYI.N		M[+16]	476.91	3	1428.72	1428.71	0	4.5	17	Non	505.55	400.52	5.76	6.03	1651	>sp|P02817|AMELX_BOVIN Amelogenin, X isoform OS=Bos taurus OX=9913 GN=AMELX PE=1 SV=2	1	hf1_10472_ebo_32_1_261219.ScanId;v=1;d1=11941.11941.3	controllerType=0 controllerNumber=1 scan=11941	28.0034
49919:3	1	S.MPLPPHPGHPGYIN.F			509.594	3	1526.77	1526.76	0	7.1	17	Non	330.97	262.16	262.16	4.82	1651	>sp|P02817|AMELX_BOVIN Amelogenin, X isoform OS=Bos taurus OX=9913 GN=AMELX PE=1 SV=2	1	hf1_10472_ebo_32_1_261219.ScanId;v=1;d1=36370.36370.3	controllerType=0 controllerNumber=1 scan=36370	73.4107
16693:3	1	S.MPLPPHPGHPGYIN.F			509.593	3	1526.76	1526.76	0	4.7	17	Non	437.92	346.69	346.69	5.45	1651	>sp|P02817|AMELX_BOVIN Amelogenin, X isoform OS=Bos taurus OX=9913 GN=AMELX PE=1 SV=2	1	hf1_10472_ebo_32_1_261219.ScanId;v=1;d1=13296.13296.3	controllerType=0 controllerNumber=1 scan=13296	30.3194
15472:3	1	S.MPLPPHPGHPGYIN.F			509.593	3	1526.77	1526.76	0	5.3	17	Non	515.31	394.75	394.75	6.37	1651	>sp|P02817|AMELX_BOVIN Amelogenin, X isoform OS=Bos taurus OX=9913 GN=AMELX PE=1 SV=2	1	hf1_10472_ebo_32_1_261219.ScanId;v=1;d1=12469.12469.3	controllerType=0 controllerNumber=1 scan=12469	28.9221
16394:3	1	S.MPLPPHPGHPGYIN.F			509.592	3	1526.76	1526.76	0	3.7	17	Non	530.65	423.81	423.81	6.7	1651	>sp|P02817|AMELX_BOVIN Amelogenin, X isoform OS=Bos taurus OX=9913 GN=AMELX PE=1 SV=2	1	hf1_10472_ebo_32_1_261219.ScanId;v=1;d1=13096.13096.3	controllerType=0 controllerNumber=1 scan=13096	29.9755
15543:2	1	S.MPLPPHPGHPGYIN.F			763.886	2	1526.76	1526.76	0	4.5	17	Non	539.47	370.64	370.64	6.4	1651	>sp|P02817|AMELX_BOVIN Amelogenin, X isoform OS=Bos taurus OX=9913 GN=AMELX PE=1 SV=2	1	hf1_10472_ebo_32_1_261219.ScanId;v=1;d1=12517.12517.2	controllerType=0 controllerNumber=1 scan=12517	29.001
16074:3	1	S.MPLPPHPGHPGYIN.F			509.594	3	1526.77	1526.76	0	6.1	17	Non	577.15	458.5	458.5	7.76	1651	>sp|P02817|AMELX_BOVIN Amelogenin, X isoform OS=Bos taurus OX=9913 GN=AMELX PE=1 SV=2	1	hf1_10472_ebo_32_1_261219.ScanId;v=1;d1=12882.12882.3	controllerType=0 controllerNumber=1 scan=12882	29.6312
15780:3	1	S.MPLPPHPGHPGYIN.F			509.593	3	1526.76	1526.76	0	4.3	17	Non	581.63	496.35	496.35	7.48	1651	>sp|P02817|AMELX_BOVIN Amelogenin, X isoform OS=Bos taurus OX=9913 GN=AMELX PE=1 SV=2	1	hf1_10472_ebo_32_1_261219.ScanId;v=1;d1=12676.12676.3	controllerType=0 controllerNumber=1 scan=12676	29.2756
16540:2	1	S.MPLPPHPGHPGYIN.F			763.885	2	1526.76	1526.76	0	3.5	17	Non	612.58	448.01	448.01	8.7	1651	>sp|P02817|AMELX_BOVIN Amelogenin, X isoform OS=Bos taurus OX=9913 GN=AMELX PE=1 SV=2	1	hf1_10472_ebo_32_1_261219.ScanId;v=1;d1=13191.13191.2	controllerType=0 controllerNumber=1 scan=13191	30.1379
16127:2	1	S.MPLPPHPGHPGYIN.F			763.886	2	1526.77	1526.76	0	5.6	17	Non	661.5	467.37	467.37	9.52	1651	>sp|P02817|AMELX_BOVIN Amelogenin, X isoform OS=Bos taurus OX=9913 GN=AMELX PE=1 SV=2	1	hf1_10472_ebo_32_1_261219.ScanId;v=1;d1=12915.12915.2	controllerType=0 controllerNumber=1 scan=12915	29.6862
15834:2	1	S.MPLPPHPGHPGYIN.F			763.886	2	1526.76	1526.76	0	4.3	17	Non	700.05	498.25	498.25	10.24	1651	>sp|P02817|AMELX_BOVIN Amelogenin, X isoform OS=Bos taurus OX=9913 GN=AMELX PE=1 SV=2	1	hf1_10472_ebo_32_1_261219.ScanId;v=1;d1=12713.12713.2	controllerType=0 controllerNumber=1 scan=12713	29.3407
01278:3	1	S.MP[+15.995]LPPHPGHPGYIN.F		P[+16]	514.924	3	1542.76	1542.75	0	3.8	17	Non	91.11	91.11	4	1.43	1651	>sp|P02817|AMELX_BOVIN Amelogenin, X isoform OS=Bos taurus OX=9913 GN=AMELX PE=1 SV=2	1	hf1_10472_ebo_32_1_261219.ScanId;v=1;d1=2583.2583.3	controllerType=0 controllerNumber=1 scan=2583	12.1051
12910:3	1	S.MP[+15.995]LPPHPGHPGYIN.F		P[+16]	514.926	3	1542.76	1542.75	0	6.4	17	Non	148.73	148.73	4	1.56	1651	>sp|P02817|AMELX_BOVIN Amelogenin, X isoform OS=Bos taurus OX=9913 GN=AMELX PE=1 SV=2	1	hf1_10472_ebo_32_1_261219.ScanId;v=1;d1=10744.10744.2	controllerType=0 controllerNumber=1 scan=10744	25.8846
01033:3	1	S.MP[+15.995]LPPHPGHPGYIN.F		P[+16]	514.924	3	1542.76	1542.75	0	2.7	17	Non	162.07	162.07	4	2.63	1651	>sp|P02817|AMELX_BOVIN Amelogenin, X isoform OS=Bos taurus OX=9913 GN=AMELX PE=1 SV=2	1	hf1_10472_ebo_32_1_261219.ScanId;v=1;d1=2401.2401.3	controllerType=0 controllerNumber=1 scan=2401	11.7505
00798:3	1	S.MP[+15.995]LPPHPGHPGYIN.F		P[+16]	514.925	3	1542.76	1542.75	0	4.5	17	Non	184.78	184.78	4	2.89	1651	>sp|P02817|AMELX_BOVIN Amelogenin, X isoform OS=Bos taurus OX=9913 GN=AMELX PE=1 SV=2	1	hf1_10472_ebo_32_1_261219.ScanId;v=1;d1=2237.2237.3	controllerType=0 controllerNumber=1 scan=2237	11.396
13832:2	1	S.M[+15.995]PLPPHPGHPGYIN.F		M[+16]	771.883	2	1542.76	1542.75	0	4	17	Non	278.7	268.76	30.74	4.49	1651	>sp|P02817|AMELX_BOVIN Amelogenin, X isoform OS=Bos taurus OX=9913 GN=AMELX PE=1 SV=2	1	hf1_10472_ebo_32_1_261219.ScanId;v=1;d1=11367.11367.2	controllerType=0 controllerNumber=1 scan=11367	26.979
13774:3	1	S.M[+15.995]PLPPHPGHPGYIN.F		M[+16]	514.925	3	1542.76	1542.75	0	5.3	17	Non	284.36	284.36	7.49	4.87	1651	>sp|P02817|AMELX_BOVIN Amelogenin, X isoform OS=Bos taurus OX=9913 GN=AMELX PE=1 SV=2	1	hf1_10472_ebo_32_1_261219.ScanId;v=1;d1=11329.11329.3	controllerType=0 controllerNumber=1 scan=11329	26.915
14028:3	1	S.M[+31.990]PLPPHPGHPGYIN.F		M[+32]	520.258	3	1558.76	1558.75	0	7.7	17	Non	291.25	291.25	9.27	4.27	1651	>sp|P02817|AMELX_BOVIN Amelogenin, X isoform OS=Bos taurus OX=9913 GN=AMELX PE=1 SV=2	1	hf1_10472_ebo_32_1_261219.ScanId;v=1;d1=11503.11503.3	controllerType=0 controllerNumber=1 scan=11503	27.2207
14615:3	1	S.MPLP[+15.995]PHPGHPGYIN.F		P[+16]	514.925	3	1542.76	1542.75	0	5.9	17	Non	296.35	240.25	1.46	4.7	1651	>sp|P02817|AMELX_BOVIN Amelogenin, X isoform OS=Bos taurus OX=9913 GN=AMELX PE=1 SV=2	1	hf1_10472_ebo_32_1_261219.ScanId;v=1;d1=11908.11908.3	controllerType=0 controllerNumber=1 scan=11908	27.9493
00039:3	1	S.MP[+15.995]LPPHPGHPGYIN.F		P[+16]	514.926	3	1542.76	1542.75	0	7.1	17	Non	305.81	305.81	4	4.61	1651	>sp|P02817|AMELX_BOVIN Amelogenin, X isoform OS=Bos taurus OX=9913 GN=AMELX PE=1 SV=2	1	hf1_10472_ebo_32_1_261219.ScanId;v=1;d1=119.119.3	controllerType=0 controllerNumber=1 scan=119	0.5698
15766:3	1	S.MPLPPHPGHP[+15.995]GYIN.F		P[+16]	514.924	3	1542.76	1542.75	0	4.3	17	Non	308.46	212.91	6.87	4.05	1651	>sp|P02817|AMELX_BOVIN Amelogenin, X isoform OS=Bos taurus OX=9913 GN=AMELX PE=1 SV=2	1	hf1_10472_ebo_32_1_261219.ScanId;v=1;d1=12666.12666.3	controllerType=0 controllerNumber=1 scan=12666	29.2591
13740:3	1	S.M[+31.990]PLPPHPGHPGYIN.F		M[+32]	520.258	3	1558.76	1558.75	0	7	17	Non	325.77	284.34	16.78	4.43	1651	>sp|P02817|AMELX_BOVIN Amelogenin, X isoform OS=Bos taurus OX=9913 GN=AMELX PE=1 SV=2	1	hf1_10472_ebo_32_1_261219.ScanId;v=1;d1=11307.11307.3	controllerType=0 controllerNumber=1 scan=11307	26.877
15464:3	1	S.MPLPPHPGH[+15.995]PGYIN.F		H[+16]	514.925	3	1542.76	1542.75	0	6	17	Non	336.97	261.29	2.98	4.43	1651	>sp|P02817|AMELX_BOVIN Amelogenin, X isoform OS=Bos taurus OX=9913 GN=AMELX PE=1 SV=2	1	hf1_10472_ebo_32_1_261219.ScanId;v=1;d1=12463.12463.3	controllerType=0 controllerNumber=1 scan=12463	28.9105
49978:3	1	S.MP[+15.995]LPPHPGHPGYIN.F		P[+16]	514.926	3	1542.76	1542.75	0	7.8	17	Non	359.14	359.14	4	5.16	1651	>sp|P02817|AMELX_BOVIN Amelogenin, X isoform OS=Bos taurus OX=9913 GN=AMELX PE=1 SV=2	1	hf1_10472_ebo_32_1_261219.ScanId;v=1;d1=36407.36407.3	controllerType=0 controllerNumber=1 scan=36407	73.4746
13142:3	1	S.M[+31.990]PLPPHPGHPGYIN.F		M[+32]	520.256	3	1558.75	1558.75	0	4	17	Non	370.45	370.45	6.68	5.75	1651	>sp|P02817|AMELX_BOVIN Amelogenin, X isoform OS=Bos taurus OX=9913 GN=AMELX PE=1 SV=2	1	hf1_10472_ebo_32_1_261219.ScanId;v=1;d1=10908.10908.3	controllerType=0 controllerNumber=1 scan=10908	26.1783
13178:3	1	S.M[+15.995]PLPPHPGHPGYIN.F		M[+16]	514.926	3	1542.76	1542.75	0	6.5	17	Non	372.98	372.98	14.05	6.3	1651	>sp|P02817|AMELX_BOVIN Amelogenin, X isoform OS=Bos taurus OX=9913 GN=AMELX PE=1 SV=2	1	hf1_10472_ebo_32_1_261219.ScanId;v=1;d1=10933.10933.3	controllerType=0 controllerNumber=1 scan=10933	26.224
17884:2	1	S.MPLPPHPGHPGYIN[+0.984].F		N[+1]	764.377	2	1527.75	1527.74	0	3.9	17	Non	379.85	327.64	327.64	5.09	1651	>sp|P02817|AMELX_BOVIN Amelogenin, X isoform OS=Bos taurus OX=9913 GN=AMELX PE=1 SV=2	1	hf1_10472_ebo_32_1_261219.ScanId;v=1;d1=14124.14124.2	controllerType=0 controllerNumber=1 scan=14124	31.764
13232:2	1	S.M[+15.995]PLPPHPGHPGYIN.F		M[+16]	771.885	2	1542.76	1542.75	0	6.2	17	Non	398.12	398.12	26	6.46	1651	>sp|P02817|AMELX_BOVIN Amelogenin, X isoform OS=Bos taurus OX=9913 GN=AMELX PE=1 SV=2	1	hf1_10472_ebo_32_1_261219.ScanId;v=1;d1=10970.10970.2	controllerType=0 controllerNumber=1 scan=10970	26.2888
11769:2	1	S.M[+15.995]PLPPHPGHPGYIN.F		M[+16]	771.886	2	1542.76	1542.75	0	7.8	17	Non	415.01	370.55	15.99	6.04	1651	>sp|P02817|AMELX_BOVIN Amelogenin, X isoform OS=Bos taurus OX=9913 GN=AMELX PE=1 SV=2	1	hf1_10472_ebo_32_1_261219.ScanId;v=1;d1=9968.9968.2	controllerType=0 controllerNumber=1 scan=9968	24.5423
14920:3	1	S.MPLPPHPGHP[+15.995]GYIN.F		P[+16]	514.926	3	1542.76	1542.75	0	6.5	17	Non	419.27	331.09	9.96	5.12	1651	>sp|P02817|AMELX_BOVIN Amelogenin, X isoform OS=Bos taurus OX=9913 GN=AMELX PE=1 SV=2	1	hf1_10472_ebo_32_1_261219.ScanId;v=1;d1=12109.12109.3	controllerType=0 controllerNumber=1 scan=12109	28.2951
13447:3	1	S.M[+31.990]PLPPHPGHPGYIN.F		M[+32]	520.257	3	1558.76	1558.75	0	5.9	17	Non	427.07	374.36	10.43	6	1651	>sp|P02817|AMELX_BOVIN Amelogenin, X isoform OS=Bos taurus OX=9913 GN=AMELX PE=1 SV=2	1	hf1_10472_ebo_32_1_261219.ScanId;v=1;d1=11109.11109.3	controllerType=0 controllerNumber=1 scan=11109	26.5334
12031:3	1	S.M[+15.995]PLPPHPGHPGYIN.F		M[+16]	514.925	3	1542.76	1542.75	0	4.6	17	Non	445.32	445.32	6.28	6.11	1651	>sp|P02817|AMELX_BOVIN Amelogenin, X isoform OS=Bos taurus OX=9913 GN=AMELX PE=1 SV=2	1	hf1_10472_ebo_32_1_261219.ScanId;v=1;d1=10149.10149.3	controllerType=0 controllerNumber=1 scan=10149	24.8483
17842:3	1	S.MPLPPHPGHPGYIN[+0.984].F		N[+1]	509.921	3	1527.75	1527.74	0	5	17	Non	452.3	432.55	432.55	6.33	1651	>sp|P02817|AMELX_BOVIN Amelogenin, X isoform OS=Bos taurus OX=9913 GN=AMELX PE=1 SV=2	1	hf1_10472_ebo_32_1_261219.ScanId;v=1;d1=14095.14095.3	controllerType=0 controllerNumber=1 scan=14095	31.7138
12907:3	1	S.M[+15.995]PLPPHPGHPGYIN.F		M[+16]	514.926	3	1542.76	1542.75	0	6.4	17	Non	475.97	475.97	6.49	6.84	1651	>sp|P02817|AMELX_BOVIN Amelogenin, X isoform OS=Bos taurus OX=9913 GN=AMELX PE=1 SV=2	1	hf1_10472_ebo_32_1_261219.ScanId;v=1;d1=10742.10742.3	controllerType=0 controllerNumber=1 scan=10742	25.8827
13532:2	1	S.M[+15.995]PLPPHPGHPGYIN.F		M[+16]	771.884	2	1542.76	1542.75	0	5.7	17	Non	477.38	469.75	39.73	6.27	1651	>sp|P02817|AMELX_BOVIN Amelogenin, X isoform OS=Bos taurus OX=9913 GN=AMELX PE=1 SV=2	1	hf1_10472_ebo_32_1_261219.ScanId;v=1;d1=11168.11168.2	controllerType=0 controllerNumber=1 scan=11168	26.636
12605:3	1	S.M[+15.995]PLPPHPGHPGYIN.F		M[+16]	514.926	3	1542.76	1542.75	0	7.7	17	Non	508.02	508.02	21.51	6.61	1651	>sp|P02817|AMELX_BOVIN Amelogenin, X isoform OS=Bos taurus OX=9913 GN=AMELX PE=1 SV=2	1	hf1_10472_ebo_32_1_261219.ScanId;v=1;d1=10546.10546.3	controllerType=0 controllerNumber=1 scan=10546	25.5443
12310:3	1	S.M[+15.995]PLPPHPGHPGYIN.F		M[+16]	514.926	3	1542.76	1542.75	0	7.5	17	Non	518.29	518.29	15.08	6.61	1651	>sp|P02817|AMELX_BOVIN Amelogenin, X isoform OS=Bos taurus OX=9913 GN=AMELX PE=1 SV=2	1	hf1_10472_ebo_32_1_261219.ScanId;v=1;d1=10347.10347.3	controllerType=0 controllerNumber=1 scan=10347	25.1977
11793:2	1	S.M[+15.995]PLPPHPGHPGYIN.F		M[+16]	771.884	2	1542.76	1542.75	0	5.4	17	Non	522.41	472.82	23.06	6.41	1651	>sp|P02817|AMELX_BOVIN Amelogenin, X isoform OS=Bos taurus OX=9913 GN=AMELX PE=1 SV=2	1	hf1_10472_ebo_32_1_261219.ScanId;v=1;d1=9983.9983.2	controllerType=0 controllerNumber=1 scan=9983	24.5696
16694:3	1	S.MPLPPHPGHPGYIN[+0.984].F		N[+1]	509.92	3	1527.75	1527.74	0	2.8	17	Non	541.82	514.69	514.69	6.7	1651	>sp|P02817|AMELX_BOVIN Amelogenin, X isoform OS=Bos taurus OX=9913 GN=AMELX PE=1 SV=2	1	hf1_10472_ebo_32_1_261219.ScanId;v=1;d1=13296.13296.3	controllerType=0 controllerNumber=1 scan=13296	30.3194
17556:3	1	S.MPLPPHPGHPGYIN[+0.984].F		N[+1]	509.921	3	1527.75	1527.74	0	5.1	17	Non	552.33	506.95	506.95	6.98	1651	>sp|P02817|AMELX_BOVIN Amelogenin, X isoform OS=Bos taurus OX=9913 GN=AMELX PE=1 SV=2	1	hf1_10472_ebo_32_1_261219.ScanId;v=1;d1=13896.13896.3	controllerType=0 controllerNumber=1 scan=13896	31.3668
12958:2	1	S.M[+15.995]PLPPHPGHPGYIN.F		M[+16]	771.884	2	1542.76	1542.75	0	5.8	17	Non	611.33	578.26	45.96	8.52	1651	>sp|P02817|AMELX_BOVIN Amelogenin, X isoform OS=Bos taurus OX=9913 GN=AMELX PE=1 SV=2	1	hf1_10472_ebo_32_1_261219.ScanId;v=1;d1=10778.10778.2	controllerType=0 controllerNumber=1 scan=10778	25.9453
17252:3	1	S.MPLPPHPGHPGYIN[+0.984].F		N[+1]	509.921	3	1527.75	1527.74	0	5.4	17	Non	620.66	566.04	566.04	8.76	1651	>sp|P02817|AMELX_BOVIN Amelogenin, X isoform OS=Bos taurus OX=9913 GN=AMELX PE=1 SV=2	1	hf1_10472_ebo_32_1_261219.ScanId;v=1;d1=13690.13690.3	controllerType=0 controllerNumber=1 scan=13690	31.0188
17367:2	1	S.MPLPPHPGHPGYIN[+0.984].F		N[+1]	764.378	2	1527.75	1527.74	0	5.4	17	Non	621.14	540.96	540.96	8.46	1651	>sp|P02817|AMELX_BOVIN Amelogenin, X isoform OS=Bos taurus OX=9913 GN=AMELX PE=1 SV=2	1	hf1_10472_ebo_32_1_261219.ScanId;v=1;d1=13771.13771.2	controllerType=0 controllerNumber=1 scan=13771	31.1559
16954:3	1	S.MPLPPHPGHPGYIN[+0.984].F		N[+1]	509.921	3	1527.75	1527.74	0	4.8	17	Non	628.57	581.95	581.95	8.76	1651	>sp|P02817|AMELX_BOVIN Amelogenin, X isoform OS=Bos taurus OX=9913 GN=AMELX PE=1 SV=2	1	hf1_10472_ebo_32_1_261219.ScanId;v=1;d1=13489.13489.3	controllerType=0 controllerNumber=1 scan=13489	30.6681
12654:2	1	S.M[+15.995]PLPPHPGHPGYIN.F		M[+16]	771.885	2	1542.76	1542.75	0	6.1	17	Non	634.17	608.37	60.11	8.52	1651	>sp|P02817|AMELX_BOVIN Amelogenin, X isoform OS=Bos taurus OX=9913 GN=AMELX PE=1 SV=2	1	hf1_10472_ebo_32_1_261219.ScanId;v=1;d1=10581.10581.2	controllerType=0 controllerNumber=1 scan=10581	25.6055
16807:2	1	S.MPLPPHPGHPGYIN[+0.984].F		N[+1]	764.377	2	1527.75	1527.74	0	3.9	17	Non	635.31	568.92	568.92	8.24	1651	>sp|P02817|AMELX_BOVIN Amelogenin, X isoform OS=Bos taurus OX=9913 GN=AMELX PE=1 SV=2	1	hf1_10472_ebo_32_1_261219.ScanId;v=1;d1=13383.13383.2	controllerType=0 controllerNumber=1 scan=13383	30.4773
17073:2	1	S.MPLPPHPGHPGYIN[+0.984].F		N[+1]	764.378	2	1527.75	1527.74	0	4.6	17	Non	644.53	596.25	596.25	8.24	1651	>sp|P02817|AMELX_BOVIN Amelogenin, X isoform OS=Bos taurus OX=9913 GN=AMELX PE=1 SV=2	1	hf1_10472_ebo_32_1_261219.ScanId;v=1;d1=13574.13574.2	controllerType=0 controllerNumber=1 scan=13574	30.8176
12084:2	1	S.M[+15.995]PLPPHPGHPGYIN.F		M[+16]	771.883	2	1542.76	1542.75	0	4.3	17	Non	646.19	615.55	59.4	8.7	1651	>sp|P02817|AMELX_BOVIN Amelogenin, X isoform OS=Bos taurus OX=9913 GN=AMELX PE=1 SV=2	1	hf1_10472_ebo_32_1_261219.ScanId;v=1;d1=10186.10186.2	controllerType=0 controllerNumber=1 scan=10186	24.9131
12359:2	1	S.M[+15.995]PLPPHPGHPGYIN.F		M[+16]	771.884	2	1542.76	1542.75	0	5.7	17	Non	650.96	599.67	74.99	9.97	1651	>sp|P02817|AMELX_BOVIN Amelogenin, X isoform OS=Bos taurus OX=9913 GN=AMELX PE=1 SV=2	1	hf1_10472_ebo_32_1_261219.ScanId;v=1;d1=10384.10384.2	controllerType=0 controllerNumber=1 scan=10384	25.2621
12857:3	1	S.MP[+15.995]LPPHPGHP[+15.995]GYIN.F		P[+16]*2	520.256	3	1558.75	1558.75	0	5	17	Non	207.4	207.4	0.62	2.29	1651	>sp|P02817|AMELX_BOVIN Amelogenin, X isoform OS=Bos taurus OX=9913 GN=AMELX PE=1 SV=2	1	hf1_10472_ebo_32_1_261219.ScanId;v=1;d1=10710.10710.3	controllerType=0 controllerNumber=1 scan=10710	25.8286
12117:3	1	S.MP[+15.995]LPPHPGHP[+15.995]GYIN.F		P[+16]*2	520.256	3	1558.75	1558.75	0	3.7	17	Non	208.15	208.15	5.8	2.44	1651	>sp|P02817|AMELX_BOVIN Amelogenin, X isoform OS=Bos taurus OX=9913 GN=AMELX PE=1 SV=2	1	hf1_10472_ebo_32_1_261219.ScanId;v=1;d1=10208.10208.3	controllerType=0 controllerNumber=1 scan=10208	24.9502
10705:3	1	S.M[+15.995]PLPPHPGH[+15.995]PGYIN.F		H[+16], M[+16]	520.257	3	1558.76	1558.75	0	5.9	17	Non	215.07	215.07	1.79	2.55	1651	>sp|P02817|AMELX_BOVIN Amelogenin, X isoform OS=Bos taurus OX=9913 GN=AMELX PE=1 SV=2	1	hf1_10472_ebo_32_1_261219.ScanId;v=1;d1=9231.9231.3	controllerType=0 controllerNumber=1 scan=9231	23.236
12213:3	1	S.M[+15.995]PLPPHPGHP[+15.995]GYIN.F		M[+16], P[+16]	520.256	3	1558.75	1558.75	0	4.7	17	Non	242.22	242.22	2.5	4.22	1651	>sp|P02817|AMELX_BOVIN Amelogenin, X isoform OS=Bos taurus OX=9913 GN=AMELX PE=1 SV=2	1	hf1_10472_ebo_32_1_261219.ScanId;v=1;d1=10279.10279.3	controllerType=0 controllerNumber=1 scan=10279	25.0737
15896:2	1	S.MPLPPHPGHPGY[+15.995]IN[+0.984].F		N[+1], Y[+16]	772.376	2	1543.74	1543.74	0	5.3	17	Non	246.96	246.96	0	4.43	1651	>sp|P02817|AMELX_BOVIN Amelogenin, X isoform OS=Bos taurus OX=9913 GN=AMELX PE=1 SV=2	1	hf1_10472_ebo_32_1_261219.ScanId;v=1;d1=12758.12758.2	controllerType=0 controllerNumber=1 scan=12758	29.4163
15074:3	1	S.M[+31.990]PLPPHPGHPGYIN[+0.984].F		M[+32], N[+1]	520.584	3	1559.74	1559.73	0	3.6	17	Non	262.95	262.95	6.64	3.94	1651	>sp|P02817|AMELX_BOVIN Amelogenin, X isoform OS=Bos taurus OX=9913 GN=AMELX PE=1 SV=2	1	hf1_10472_ebo_32_1_261219.ScanId;v=1;d1=12210.12210.3	controllerType=0 controllerNumber=1 scan=12210	28.4715
11393:2	1	S.M[+15.995]PLPPHPGHP[+15.995]GYIN.F		M[+16], P[+16]	779.881	2	1558.75	1558.75	0	4.5	17	Non	320.87	320.87	0	5.09	1651	>sp|P02817|AMELX_BOVIN Amelogenin, X isoform OS=Bos taurus OX=9913 GN=AMELX PE=1 SV=2	1	hf1_10472_ebo_32_1_261219.ScanId;v=1;d1=9697.9697.2	controllerType=0 controllerNumber=1 scan=9697	24.0655
10996:3	1	S.MP[+15.995]LPPHPGHP[+15.995]GYIN.F		P[+16]*2	520.256	3	1558.75	1558.75	0	4.9	17	Non	344.55	344.55	5.8	5.1	1651	>sp|P02817|AMELX_BOVIN Amelogenin, X isoform OS=Bos taurus OX=9913 GN=AMELX PE=1 SV=2	1	hf1_10472_ebo_32_1_261219.ScanId;v=1;d1=9428.9428.3	controllerType=0 controllerNumber=1 scan=9428	23.5795
15767:3	1	S.MPLPPHPGHP[+15.995]GYIN[+0.984].F		N[+1], P[+16]	515.252	3	1543.74	1543.74	0	2.6	17	Non	372.28	357.29	6.87	4.83	1651	>sp|P02817|AMELX_BOVIN Amelogenin, X isoform OS=Bos taurus OX=9913 GN=AMELX PE=1 SV=2	1	hf1_10472_ebo_32_1_261219.ScanId;v=1;d1=12666.12666.3	controllerType=0 controllerNumber=1 scan=12666	29.2591
16060:3	1	S.MPLPPHPGHP[+15.995]GYIN[+0.984].F		N[+1], P[+16]	515.253	3	1543.74	1543.74	0	5.2	17	Non	390.38	358.22	5.27	5.1	1651	>sp|P02817|AMELX_BOVIN Amelogenin, X isoform OS=Bos taurus OX=9913 GN=AMELX PE=1 SV=2	1	hf1_10472_ebo_32_1_261219.ScanId;v=1;d1=12873.12873.3	controllerType=0 controllerNumber=1 scan=12873	29.6164
14394:2	1	S.M[+15.995]PLPPHPGHPGYIN[+0.984].F		M[+16], N[+1]	772.376	2	1543.74	1543.74	0	5	17	Non	402.63	366	27.18	6.21	1651	>sp|P02817|AMELX_BOVIN Amelogenin, X isoform OS=Bos taurus OX=9913 GN=AMELX PE=1 SV=2	1	hf1_10472_ebo_32_1_261219.ScanId;v=1;d1=11759.11759.2	controllerType=0 controllerNumber=1 scan=11759	27.6797
11275:3	1	S.M[+15.995]PLPPHPGHP[+15.995]GYIN.F		M[+16], P[+16]	520.256	3	1558.75	1558.75	0	4.9	17	Non	415.89	415.89	10.07	6	1651	>sp|P02817|AMELX_BOVIN Amelogenin, X isoform OS=Bos taurus OX=9913 GN=AMELX PE=1 SV=2	1	hf1_10472_ebo_32_1_261219.ScanId;v=1;d1=9619.9619.3	controllerType=0 controllerNumber=1 scan=9619	23.9277
13179:3	1	S.M[+15.995]PLPPHPGHPGYIN[+0.984].F		M[+16], N[+1]	515.255	3	1543.75	1543.74	0	8.4	17	Non	458.92	458.92	13.18	6.62	1651	>sp|P02817|AMELX_BOVIN Amelogenin, X isoform OS=Bos taurus OX=9913 GN=AMELX PE=1 SV=2	1	hf1_10472_ebo_32_1_261219.ScanId;v=1;d1=10933.10933.3	controllerType=0 controllerNumber=1 scan=10933	26.224
13233:2	1	S.M[+15.995]PLPPHPGHPGYIN[+0.984].F		M[+16], N[+1]	772.377	2	1543.75	1543.74	0	6.5	17	Non	467.66	412.7	49.21	6.27	1651	>sp|P02817|AMELX_BOVIN Amelogenin, X isoform OS=Bos taurus OX=9913 GN=AMELX PE=1 SV=2	1	hf1_10472_ebo_32_1_261219.ScanId;v=1;d1=10970.10970.2	controllerType=0 controllerNumber=1 scan=10970	26.2888
13775:3	1	S.M[+15.995]PLPPHPGHPGYIN[+0.984].F		M[+16], N[+1]	515.252	3	1543.74	1543.74	0	4.1	17	Non	491.33	491.33	15.78	6.55	1651	>sp|P02817|AMELX_BOVIN Amelogenin, X isoform OS=Bos taurus OX=9913 GN=AMELX PE=1 SV=2	1	hf1_10472_ebo_32_1_261219.ScanId;v=1;d1=11329.11329.3	controllerType=0 controllerNumber=1 scan=11329	26.915
13483:3	1	S.M[+15.995]PLPPHPGHPGYIN[+0.984].F		M[+16], N[+1]	515.254	3	1543.75	1543.74	0	7.1	17	Non	491.58	491.58	24.67	6.61	1651	>sp|P02817|AMELX_BOVIN Amelogenin, X isoform OS=Bos taurus OX=9913 GN=AMELX PE=1 SV=2	1	hf1_10472_ebo_32_1_261219.ScanId;v=1;d1=11134.11134.3	controllerType=0 controllerNumber=1 scan=11134	26.5778
13833:2	1	S.M[+15.995]PLPPHPGHPGYIN[+0.984].F		M[+16], N[+1]	772.373	2	1543.74	1543.74	0	1.8	17	Non	499.69	454.93	69.58	5.79	1651	>sp|P02817|AMELX_BOVIN Amelogenin, X isoform OS=Bos taurus OX=9913 GN=AMELX PE=1 SV=2	1	hf1_10472_ebo_32_1_261219.ScanId;v=1;d1=11367.11367.2	controllerType=0 controllerNumber=1 scan=11367	26.979
14336:3	1	S.M[+15.995]PLPPHPGHPGYIN[+0.984].F		M[+16], N[+1]	515.252	3	1543.74	1543.74	0	3.8	17	Non	501.61	501.61	9.62	6.09	1651	>sp|P02817|AMELX_BOVIN Amelogenin, X isoform OS=Bos taurus OX=9913 GN=AMELX PE=1 SV=2	1	hf1_10472_ebo_32_1_261219.ScanId;v=1;d1=11720.11720.3	controllerType=0 controllerNumber=1 scan=11720	27.6095
14114:2	1	S.M[+15.995]PLPPHPGHPGYIN[+0.984].F		M[+16], N[+1]	772.375	2	1543.74	1543.74	0	4	17	Non	508.21	448.92	53.38	6.25	1651	>sp|P02817|AMELX_BOVIN Amelogenin, X isoform OS=Bos taurus OX=9913 GN=AMELX PE=1 SV=2	1	hf1_10472_ebo_32_1_261219.ScanId;v=1;d1=11564.11564.2	controllerType=0 controllerNumber=1 scan=11564	27.3315
13533:2	1	S.M[+15.995]PLPPHPGHPGYIN[+0.984].F		M[+16], N[+1]	772.375	2	1543.74	1543.74	0	4	17	Non	511.59	445.07	57.22	6.25	1651	>sp|P02817|AMELX_BOVIN Amelogenin, X isoform OS=Bos taurus OX=9913 GN=AMELX PE=1 SV=2	1	hf1_10472_ebo_32_1_261219.ScanId;v=1;d1=11168.11168.2	controllerType=0 controllerNumber=1 scan=11168	26.636
14056:3	1	S.M[+15.995]PLPPHPGHPGYIN[+0.984].F		M[+16], N[+1]	515.252	3	1543.74	1543.74	0	3.8	17	Non	554.45	554.45	16.58	6.7	1651	>sp|P02817|AMELX_BOVIN Amelogenin, X isoform OS=Bos taurus OX=9913 GN=AMELX PE=1 SV=2	1	hf1_10472_ebo_32_1_261219.ScanId;v=1;d1=11523.11523.3	controllerType=0 controllerNumber=1 scan=11523	27.2574
00318:3	1	S.MPLPPHPGHPGYINF.S			558.617	3	1673.84	1673.83	0	6.2	17	Non	60.45	60.45	60.45	1.48	1651	>sp|P02817|AMELX_BOVIN Amelogenin, X isoform OS=Bos taurus OX=9913 GN=AMELX PE=1 SV=2	1	hf1_10472_ebo_32_1_261219.ScanId;v=1;d1=1053.1053.3	controllerType=0 controllerNumber=1 scan=1053	5.5056
00720:2	1	S.MPLPPHPGHPGYINF.S			837.421	2	1673.83	1673.83	0	5.1	17	Non	64.37	64.37	64.37	1.93	1651	>sp|P02817|AMELX_BOVIN Amelogenin, X isoform OS=Bos taurus OX=9913 GN=AMELX PE=1 SV=2	1	hf1_10472_ebo_32_1_261219.ScanId;v=1;d1=2158.2158.3	controllerType=0 controllerNumber=1 scan=2158	11.1367
00301:3	1	S.MPLPPHPGHPGYINF.S			558.617	3	1673.84	1673.83	0	6.2	17	Non	115.55	115.55	115.55	1.43	1651	>sp|P02817|AMELX_BOVIN Amelogenin, X isoform OS=Bos taurus OX=9913 GN=AMELX PE=1 SV=2	1	hf1_10472_ebo_32_1_261219.ScanId;v=1;d1=992.992.3	controllerType=0 controllerNumber=1 scan=992	5.1673
00383:3	1	S.MPLPPHPGHPGYINF.S			558.616	3	1673.83	1673.83	0	4.5	17	Non	117.42	117.42	117.42	2.3	1651	>sp|P02817|AMELX_BOVIN Amelogenin, X isoform OS=Bos taurus OX=9913 GN=AMELX PE=1 SV=2	1	hf1_10472_ebo_32_1_261219.ScanId;v=1;d1=1299.1299.3	controllerType=0 controllerNumber=1 scan=1299	6.8647
00470:3	1	S.MPLPPHPGHPGYINF.S			558.614	3	1673.83	1673.83	0	0.5	17	Non	117.64	117.64	117.64	1.47	1651	>sp|P02817|AMELX_BOVIN Amelogenin, X isoform OS=Bos taurus OX=9913 GN=AMELX PE=1 SV=2	1	hf1_10472_ebo_32_1_261219.ScanId;v=1;d1=1673.1673.3	controllerType=0 controllerNumber=1 scan=1673	8.9067
43546:3	1	S.MPLPPHPGHPGYINF.S			558.616	3	1673.83	1673.83	0	4.2	17	Non	126.2	126.2	126.2	2.42	1651	>sp|P02817|AMELX_BOVIN Amelogenin, X isoform OS=Bos taurus OX=9913 GN=AMELX PE=1 SV=2	1	hf1_10472_ebo_32_1_261219.ScanId;v=1;d1=31191.31191.3	controllerType=0 controllerNumber=1 scan=31191	61.4888
46178:3	1	S.MPLPPHPGHPGYINF.S			558.617	3	1673.84	1673.83	0	6	17	Non	129.21	129.21	129.21	2.53	1651	>sp|P02817|AMELX_BOVIN Amelogenin, X isoform OS=Bos taurus OX=9913 GN=AMELX PE=1 SV=2	1	hf1_10472_ebo_32_1_261219.ScanId;v=1;d1=32913.32913.3	controllerType=0 controllerNumber=1 scan=32913	64.5576
00268:3	1	S.MPLPPHPGHPGYINF.S			558.617	3	1673.84	1673.83	0	6.4	17	Non	132.37	132.37	132.37	2.53	1651	>sp|P02817|AMELX_BOVIN Amelogenin, X isoform OS=Bos taurus OX=9913 GN=AMELX PE=1 SV=2	1	hf1_10472_ebo_32_1_261219.ScanId;v=1;d1=868.868.3	controllerType=0 controllerNumber=1 scan=868	4.4851
00102:3	1	S.MPLPPHPGHPGYINF.S			558.617	3	1673.84	1673.83	0	6.8	17	Non	134.53	134.53	134.53	2.53	1651	>sp|P02817|AMELX_BOVIN Amelogenin, X isoform OS=Bos taurus OX=9913 GN=AMELX PE=1 SV=2	1	hf1_10472_ebo_32_1_261219.ScanId;v=1;d1=514.514.3	controllerType=0 controllerNumber=1 scan=514	2.7846
44421:3	1	S.MPLPPHPGHPGYINF.S			558.616	3	1673.83	1673.83	0	5.1	17	Non	136.02	136.02	136.02	2.53	1651	>sp|P02817|AMELX_BOVIN Amelogenin, X isoform OS=Bos taurus OX=9913 GN=AMELX PE=1 SV=2	1	hf1_10472_ebo_32_1_261219.ScanId;v=1;d1=31756.31756.3	controllerType=0 controllerNumber=1 scan=31756	62.4918
00227:3	1	S.MPLPPHPGHPGYINF.S			558.616	3	1673.83	1673.83	0	5	17	Non	137.83	137.83	137.83	2.53	1651	>sp|P02817|AMELX_BOVIN Amelogenin, X isoform OS=Bos taurus OX=9913 GN=AMELX PE=1 SV=2	1	hf1_10472_ebo_32_1_261219.ScanId;v=1;d1=741.741.3	controllerType=0 controllerNumber=1 scan=741	3.8017
00419:3	1	S.MPLPPHPGHPGYINF.S			558.616	3	1673.83	1673.83	0	4.6	17	Non	146.85	146.85	146.85	2.29	1651	>sp|P02817|AMELX_BOVIN Amelogenin, X isoform OS=Bos taurus OX=9913 GN=AMELX PE=1 SV=2	1	hf1_10472_ebo_32_1_261219.ScanId;v=1;d1=1483.1483.3	controllerType=0 controllerNumber=1 scan=1483	7.888
44044:3	1	S.MPLPPHPGHPGYINF.S			558.617	3	1673.84	1673.83	0	5.7	17	Non	157.48	157.48	157.48	2.53	1651	>sp|P02817|AMELX_BOVIN Amelogenin, X isoform OS=Bos taurus OX=9913 GN=AMELX PE=1 SV=2	1	hf1_10472_ebo_32_1_261219.ScanId;v=1;d1=31518.31518.3	controllerType=0 controllerNumber=1 scan=31518	62.0695
50129:3	1	S.MPLPPHPGHPGYINF.S			558.618	3	1673.84	1673.83	0	8.7	17	Non	161.29	161.29	161.29	2.44	1651	>sp|P02817|AMELX_BOVIN Amelogenin, X isoform OS=Bos taurus OX=9913 GN=AMELX PE=1 SV=2	1	hf1_10472_ebo_32_1_261219.ScanId;v=1;d1=36684.36684.3	controllerType=0 controllerNumber=1 scan=36684	74.7287
00354:3	1	S.MPLPPHPGHPGYINF.S			558.617	3	1673.84	1673.83	0	6.5	17	Non	165.62	165.62	165.62	3.21	1651	>sp|P02817|AMELX_BOVIN Amelogenin, X isoform OS=Bos taurus OX=9913 GN=AMELX PE=1 SV=2	1	hf1_10472_ebo_32_1_261219.ScanId;v=1;d1=1176.1176.3	controllerType=0 controllerNumber=1 scan=1176	6.184
45033:3	1	S.MPLPPHPGHPGYINF.S			558.616	3	1673.83	1673.83	0	4.7	17	Non	169.55	169.55	169.55	3.21	1651	>sp|P02817|AMELX_BOVIN Amelogenin, X isoform OS=Bos taurus OX=9913 GN=AMELX PE=1 SV=2	1	hf1_10472_ebo_32_1_261219.ScanId;v=1;d1=32151.32151.3	controllerType=0 controllerNumber=1 scan=32151	63.1955
00454:3	1	S.MPLPPHPGHPGYINF.S			558.616	3	1673.83	1673.83	0	4.4	17	Non	170.68	170.68	170.68	2.97	1651	>sp|P02817|AMELX_BOVIN Amelogenin, X isoform OS=Bos taurus OX=9913 GN=AMELX PE=1 SV=2	1	hf1_10472_ebo_32_1_261219.ScanId;v=1;d1=1610.1610.3	controllerType=0 controllerNumber=1 scan=1610	8.5662
50189:3	1	S.MPLPPHPGHPGYINF.S			558.615	3	1673.83	1673.83	0	2.4	17	Non	215.31	215.31	215.31	3.29	1651	>sp|P02817|AMELX_BOVIN Amelogenin, X isoform OS=Bos taurus OX=9913 GN=AMELX PE=1 SV=2	1	hf1_10472_ebo_32_1_261219.ScanId;v=1;d1=36874.36874.3	controllerType=0 controllerNumber=1 scan=36874	75.7526
50354:3	1	S.MPLPPHPGHPGYINF.S			558.617	3	1673.84	1673.83	0	5.9	17	Non	230.63	230.63	230.63	3.92	1651	>sp|P02817|AMELX_BOVIN Amelogenin, X isoform OS=Bos taurus OX=9913 GN=AMELX PE=1 SV=2	1	hf1_10472_ebo_32_1_261219.ScanId;v=1;d1=37227.37227.3	controllerType=0 controllerNumber=1 scan=37227	77.4477
50214:3	1	S.MPLPPHPGHPGYINF.S			558.616	3	1673.83	1673.83	0	4.9	17	Non	235.94	235.94	235.94	3.92	1651	>sp|P02817|AMELX_BOVIN Amelogenin, X isoform OS=Bos taurus OX=9913 GN=AMELX PE=1 SV=2	1	hf1_10472_ebo_32_1_261219.ScanId;v=1;d1=36942.36942.3	controllerType=0 controllerNumber=1 scan=36942	76.0901
00683:3	1	S.MPLPPHPGHPGYINF.S			558.616	3	1673.83	1673.83	0	4.5	17	Non	247.67	244.87	244.87	4.82	1651	>sp|P02817|AMELX_BOVIN Amelogenin, X isoform OS=Bos taurus OX=9913 GN=AMELX PE=1 SV=2	1	hf1_10472_ebo_32_1_261219.ScanId;v=1;d1=2126.2126.2	controllerType=0 controllerNumber=1 scan=2126	11.0646
46951:2	1	S.MPLPPHPGHPGYINF.S			837.419	2	1673.83	1673.83	0	3.2	17	Non	279.99	279.99	279.99	4.98	1651	>sp|P02817|AMELX_BOVIN Amelogenin, X isoform OS=Bos taurus OX=9913 GN=AMELX PE=1 SV=2	1	hf1_10472_ebo_32_1_261219.ScanId;v=1;d1=33879.33879.3	controllerType=0 controllerNumber=1 scan=33879	67.7047
25752:2	1	S.MPLPPHPGHPGYINF.S			837.41	2	1673.81	1673.83	0	-7.6	17	Non	282.64	195.91	195.91	2.82	1651	>sp|P02817|AMELX_BOVIN Amelogenin, X isoform OS=Bos taurus OX=9913 GN=AMELX PE=1 SV=2	1	hf1_10472_ebo_32_1_261219.ScanId;v=1;d1=19519.19519.3	controllerType=0 controllerNumber=1 scan=19519	41.0733
46786:3	1	S.MPLPPHPGHPGYINF.S			558.615	3	1673.83	1673.83	0	2.6	17	Non	283.38	283.38	283.38	5.04	1651	>sp|P02817|AMELX_BOVIN Amelogenin, X isoform OS=Bos taurus OX=9913 GN=AMELX PE=1 SV=2	1	hf1_10472_ebo_32_1_261219.ScanId;v=1;d1=33689.33689.3	controllerType=0 controllerNumber=1 scan=33689	67.1027
50390:3	1	S.MPLPPHPGHPGYINF.S			558.616	3	1673.83	1673.83	0	4.9	17	Non	287.25	282.64	282.64	5.31	1651	>sp|P02817|AMELX_BOVIN Amelogenin, X isoform OS=Bos taurus OX=9913 GN=AMELX PE=1 SV=2	1	hf1_10472_ebo_32_1_261219.ScanId;v=1;d1=37297.37297.3	controllerType=0 controllerNumber=1 scan=37297	77.788
50111:3	1	S.MPLPPHPGHPGYINF.S			558.616	3	1673.83	1673.83	0	4.9	17	Non	288.13	288.13	288.13	5.31	1651	>sp|P02817|AMELX_BOVIN Amelogenin, X isoform OS=Bos taurus OX=9913 GN=AMELX PE=1 SV=2	1	hf1_10472_ebo_32_1_261219.ScanId;v=1;d1=36619.36619.3	controllerType=0 controllerNumber=1 scan=36619	74.3681
28040:2	1	S.MPLPPHPGHPGYINF.S			837.418	2	1673.83	1673.83	0	2.1	17	Non	294.57	199.8	199.8	3.2	1651	>sp|P02817|AMELX_BOVIN Amelogenin, X isoform OS=Bos taurus OX=9913 GN=AMELX PE=1 SV=2	1	hf1_10472_ebo_32_1_261219.ScanId;v=1;d1=21050.21050.2	controllerType=0 controllerNumber=1 scan=21050	43.6646
28762:3	1	S.MPLPPHPGHPGYINF.S			558.616	3	1673.83	1673.83	0	5.3	17	Non	314.54	310.35	310.35	5.31	1651	>sp|P02817|AMELX_BOVIN Amelogenin, X isoform OS=Bos taurus OX=9913 GN=AMELX PE=1 SV=2	1	hf1_10472_ebo_32_1_261219.ScanId;v=1;d1=21531.21531.3	controllerType=0 controllerNumber=1 scan=21531	44.4864
00032:2	1	S.MPLPPHPGHPGYINF.S			837.424	2	1673.84	1673.83	0	8.7	17	Non	318.4	250.52	250.52	5.15	1651	>sp|P02817|AMELX_BOVIN Amelogenin, X isoform OS=Bos taurus OX=9913 GN=AMELX PE=1 SV=2	1	hf1_10472_ebo_32_1_261219.ScanId;v=1;d1=114.114.2	controllerType=0 controllerNumber=1 scan=114	0.5623
49494:2	1	S.MPLPPHPGHPGYINF.S			837.421	2	1673.84	1673.83	0	5.9	17	Non	328.57	328.57	328.57	5.81	1651	>sp|P02817|AMELX_BOVIN Amelogenin, X isoform OS=Bos taurus OX=9913 GN=AMELX PE=1 SV=2	1	hf1_10472_ebo_32_1_261219.ScanId;v=1;d1=36006.36006.3	controllerType=0 controllerNumber=1 scan=36006	72.5175
50254:3	1	S.MPLPPHPGHPGYINF.S			558.615	3	1673.83	1673.83	0	2.6	17	Non	336.57	336.57	336.57	5.32	1651	>sp|P02817|AMELX_BOVIN Amelogenin, X isoform OS=Bos taurus OX=9913 GN=AMELX PE=1 SV=2	1	hf1_10472_ebo_32_1_261219.ScanId;v=1;d1=37015.37015.3	controllerType=0 controllerNumber=1 scan=37015	76.4321
50293:3	1	S.MPLPPHPGHPGYINF.S			558.615	3	1673.83	1673.83	0	2.6	17	Non	336.67	336.67	336.67	5.32	1651	>sp|P02817|AMELX_BOVIN Amelogenin, X isoform OS=Bos taurus OX=9913 GN=AMELX PE=1 SV=2	1	hf1_10472_ebo_32_1_261219.ScanId;v=1;d1=37088.37088.3	controllerType=0 controllerNumber=1 scan=37088	76.7703
21938:3	1	S.MPLPPHPGHPGYINF.S			558.619	3	1673.84	1673.83	0	9.9	17	Non	351.74	297.44	297.44	4.74	1651	>sp|P02817|AMELX_BOVIN Amelogenin, X isoform OS=Bos taurus OX=9913 GN=AMELX PE=1 SV=2	1	hf1_10472_ebo_32_1_261219.ScanId;v=1;d1=16971.16971.3	controllerType=0 controllerNumber=1 scan=16971	36.6923
23680:3	1	S.MPLPPHPGHPGYINF.S			558.619	3	1673.84	1673.83	0	9.6	17	Non	358.88	287.08	287.08	4.74	1651	>sp|P02817|AMELX_BOVIN Amelogenin, X isoform OS=Bos taurus OX=9913 GN=AMELX PE=1 SV=2	1	hf1_10472_ebo_32_1_261219.ScanId;v=1;d1=18171.18171.3	controllerType=0 controllerNumber=1 scan=18171	38.7635
22228:3	1	S.MPLPPHPGHPGYINF.S			558.618	3	1673.84	1673.83	0	8.2	17	Non	360.77	302.85	302.85	5.53	1651	>sp|P02817|AMELX_BOVIN Amelogenin, X isoform OS=Bos taurus OX=9913 GN=AMELX PE=1 SV=2	1	hf1_10472_ebo_32_1_261219.ScanId;v=1;d1=17169.17169.3	controllerType=0 controllerNumber=1 scan=17169	37.0387
46695:3	1	S.MPLPPHPGHPGYINF.S			558.617	3	1673.84	1673.83	0	6.6	17	Non	362.77	362.77	362.77	6.8	1651	>sp|P02817|AMELX_BOVIN Amelogenin, X isoform OS=Bos taurus OX=9913 GN=AMELX PE=1 SV=2	1	hf1_10472_ebo_32_1_261219.ScanId;v=1;d1=33577.33577.3	controllerType=0 controllerNumber=1 scan=33577	66.7499
50329:3	1	S.MPLPPHPGHPGYINF.S			558.615	3	1673.83	1673.83	0	2.4	17	Non	378.6	378.6	378.6	6.46	1651	>sp|P02817|AMELX_BOVIN Amelogenin, X isoform OS=Bos taurus OX=9913 GN=AMELX PE=1 SV=2	1	hf1_10472_ebo_32_1_261219.ScanId;v=1;d1=37161.37161.3	controllerType=0 controllerNumber=1 scan=37161	77.1075
28197:3	1	S.MPLPPHPGHPGYINF.S			558.616	3	1673.83	1673.83	0	3.9	17	Non	379.68	357.18	357.18	5.37	1651	>sp|P02817|AMELX_BOVIN Amelogenin, X isoform OS=Bos taurus OX=9913 GN=AMELX PE=1 SV=2	1	hf1_10472_ebo_32_1_261219.ScanId;v=1;d1=21155.21155.3	controllerType=0 controllerNumber=1 scan=21155	43.8435
27446:3	1	S.MPLPPHPGHPGYINF.S			558.617	3	1673.84	1673.83	0	5.7	17	Non	384.91	319.34	319.34	5.48	1651	>sp|P02817|AMELX_BOVIN Amelogenin, X isoform OS=Bos taurus OX=9913 GN=AMELX PE=1 SV=2	1	hf1_10472_ebo_32_1_261219.ScanId;v=1;d1=20648.20648.3	controllerType=0 controllerNumber=1 scan=20648	42.9907
48146:3	1	S.MPLPPHPGHPGYINF.S			558.615	3	1673.83	1673.83	0	3.8	17	Non	393.64	393.64	393.64	6.46	1651	>sp|P02817|AMELX_BOVIN Amelogenin, X isoform OS=Bos taurus OX=9913 GN=AMELX PE=1 SV=2	1	hf1_10472_ebo_32_1_261219.ScanId;v=1;d1=34896.34896.3	controllerType=0 controllerNumber=1 scan=34896	70.0168
48899:3	1	S.MPLPPHPGHPGYINF.S			558.615	3	1673.83	1673.83	0	2.9	17	Non	394.94	382.07	382.07	6.46	1651	>sp|P02817|AMELX_BOVIN Amelogenin, X isoform OS=Bos taurus OX=9913 GN=AMELX PE=1 SV=2	1	hf1_10472_ebo_32_1_261219.ScanId;v=1;d1=35515.35515.3	controllerType=0 controllerNumber=1 scan=35515	71.402
49102:3	1	S.MPLPPHPGHPGYINF.S			558.615	3	1673.83	1673.83	0	2.5	17	Non	396.26	396.26	396.26	6.46	1651	>sp|P02817|AMELX_BOVIN Amelogenin, X isoform OS=Bos taurus OX=9913 GN=AMELX PE=1 SV=2	1	hf1_10472_ebo_32_1_261219.ScanId;v=1;d1=35679.35679.3	controllerType=0 controllerNumber=1 scan=35679	71.7487
00744:3	1	S.MPLPPHPGHPGYINF.S			558.616	3	1673.83	1673.83	0	4.5	17	Non	400.31	400.31	400.31	6.48	1651	>sp|P02817|AMELX_BOVIN Amelogenin, X isoform OS=Bos taurus OX=9913 GN=AMELX PE=1 SV=2	1	hf1_10472_ebo_32_1_261219.ScanId;v=1;d1=2192.2192.3	controllerType=0 controllerNumber=1 scan=2192	11.2793
46862:3	1	S.MPLPPHPGHPGYINF.S			558.615	3	1673.83	1673.83	0	2.4	17	Non	402.46	402.46	402.46	6.48	1651	>sp|P02817|AMELX_BOVIN Amelogenin, X isoform OS=Bos taurus OX=9913 GN=AMELX PE=1 SV=2	1	hf1_10472_ebo_32_1_261219.ScanId;v=1;d1=33788.33788.3	controllerType=0 controllerNumber=1 scan=33788	67.4399
27835:3	1	S.MPLPPHPGHPGYINF.S			558.616	3	1673.83	1673.83	0	5.2	17	Non	407.52	343.2	343.2	5.61	1651	>sp|P02817|AMELX_BOVIN Amelogenin, X isoform OS=Bos taurus OX=9913 GN=AMELX PE=1 SV=2	1	hf1_10472_ebo_32_1_261219.ScanId;v=1;d1=20911.20911.3	controllerType=0 controllerNumber=1 scan=20911	43.4329
26476:3	1	S.MPLPPHPGHPGYINF.S			558.616	3	1673.83	1673.83	0	5.3	17	Non	408.38	370.24	370.24	6.49	1651	>sp|P02817|AMELX_BOVIN Amelogenin, X isoform OS=Bos taurus OX=9913 GN=AMELX PE=1 SV=2	1	hf1_10472_ebo_32_1_261219.ScanId;v=1;d1=20002.20002.3	controllerType=0 controllerNumber=1 scan=20002	41.8922
48332:3	1	S.MPLPPHPGHPGYINF.S			558.615	3	1673.83	1673.83	0	2.1	17	Non	413.57	413.47	413.47	6.03	1651	>sp|P02817|AMELX_BOVIN Amelogenin, X isoform OS=Bos taurus OX=9913 GN=AMELX PE=1 SV=2	1	hf1_10472_ebo_32_1_261219.ScanId;v=1;d1=35056.35056.3	controllerType=0 controllerNumber=1 scan=35056	70.36
27141:3	1	S.MPLPPHPGHPGYINF.S			558.615	3	1673.83	1673.83	0	2.7	17	Non	414.13	375.33	375.33	6.21	1651	>sp|P02817|AMELX_BOVIN Amelogenin, X isoform OS=Bos taurus OX=9913 GN=AMELX PE=1 SV=2	1	hf1_10472_ebo_32_1_261219.ScanId;v=1;d1=20446.20446.3	controllerType=0 controllerNumber=1 scan=20446	42.6448
47768:3	1	S.MPLPPHPGHPGYINF.S			558.615	3	1673.83	1673.83	0	2.3	17	Non	426.39	426.39	426.39	6.03	1651	>sp|P02817|AMELX_BOVIN Amelogenin, X isoform OS=Bos taurus OX=9913 GN=AMELX PE=1 SV=2	1	hf1_10472_ebo_32_1_261219.ScanId;v=1;d1=34583.34583.3	controllerType=0 controllerNumber=1 scan=34583	69.3294
26143:3	1	S.MPLPPHPGHPGYINF.S			558.617	3	1673.84	1673.83	0	6	17	Non	426.99	380.05	380.05	6.76	1651	>sp|P02817|AMELX_BOVIN Amelogenin, X isoform OS=Bos taurus OX=9913 GN=AMELX PE=1 SV=2	1	hf1_10472_ebo_32_1_261219.ScanId;v=1;d1=19782.19782.3	controllerType=0 controllerNumber=1 scan=19782	41.5255
47384:3	1	S.MPLPPHPGHPGYINF.S			558.615	3	1673.83	1673.83	0	2.6	17	Non	428.21	428.21	428.21	6.48	1651	>sp|P02817|AMELX_BOVIN Amelogenin, X isoform OS=Bos taurus OX=9913 GN=AMELX PE=1 SV=2	1	hf1_10472_ebo_32_1_261219.ScanId;v=1;d1=34269.34269.3	controllerType=0 controllerNumber=1 scan=34269	68.6471
47951:3	1	S.MPLPPHPGHPGYINF.S			558.617	3	1673.84	1673.83	0	5.8	17	Non	429.98	360.72	360.72	6.76	1651	>sp|P02817|AMELX_BOVIN Amelogenin, X isoform OS=Bos taurus OX=9913 GN=AMELX PE=1 SV=2	1	hf1_10472_ebo_32_1_261219.ScanId;v=1;d1=34737.34737.3	controllerType=0 controllerNumber=1 scan=34737	69.6776
26786:3	1	S.MPLPPHPGHPGYINF.S			558.616	3	1673.83	1673.83	0	4.4	17	Non	432.85	379.58	379.58	6.48	1651	>sp|P02817|AMELX_BOVIN Amelogenin, X isoform OS=Bos taurus OX=9913 GN=AMELX PE=1 SV=2	1	hf1_10472_ebo_32_1_261219.ScanId;v=1;d1=20207.20207.3	controllerType=0 controllerNumber=1 scan=20207	42.2415
49286:3	1	S.MPLPPHPGHPGYINF.S			558.616	3	1673.83	1673.83	0	5.3	17	Non	434.98	413	413	6.76	1651	>sp|P02817|AMELX_BOVIN Amelogenin, X isoform OS=Bos taurus OX=9913 GN=AMELX PE=1 SV=2	1	hf1_10472_ebo_32_1_261219.ScanId;v=1;d1=35825.35825.3	controllerType=0 controllerNumber=1 scan=35825	72.0916
25837:3	1	S.MPLPPHPGHPGYINF.S			558.617	3	1673.84	1673.83	0	7.1	17	Non	436.04	380.74	380.74	6.54	1651	>sp|P02817|AMELX_BOVIN Amelogenin, X isoform OS=Bos taurus OX=9913 GN=AMELX PE=1 SV=2	1	hf1_10472_ebo_32_1_261219.ScanId;v=1;d1=19576.19576.3	controllerType=0 controllerNumber=1 scan=19576	41.1739
01178:3	1	S.MPLPPHPGHPGYINF.S			558.616	3	1673.83	1673.83	0	3.9	17	Non	437.04	415.36	415.36	6.48	1651	>sp|P02817|AMELX_BOVIN Amelogenin, X isoform OS=Bos taurus OX=9913 GN=AMELX PE=1 SV=2	1	hf1_10472_ebo_32_1_261219.ScanId;v=1;d1=2511.2511.3	controllerType=0 controllerNumber=1 scan=2511	11.967
22526:3	1	S.MPLPPHPGHPGYINF.S			558.618	3	1673.84	1673.83	0	8.8	17	Non	438.3	390.64	390.64	6.54	1651	>sp|P02817|AMELX_BOVIN Amelogenin, X isoform OS=Bos taurus OX=9913 GN=AMELX PE=1 SV=2	1	hf1_10472_ebo_32_1_261219.ScanId;v=1;d1=17375.17375.3	controllerType=0 controllerNumber=1 scan=17375	37.3894
49862:3	1	S.MPLPPHPGHPGYINF.S			558.616	3	1673.83	1673.83	0	4.5	17	Non	440.66	435.6	435.6	6.6	1651	>sp|P02817|AMELX_BOVIN Amelogenin, X isoform OS=Bos taurus OX=9913 GN=AMELX PE=1 SV=2	1	hf1_10472_ebo_32_1_261219.ScanId;v=1;d1=36323.36323.3	controllerType=0 controllerNumber=1 scan=36323	73.3124
00647:3	1	S.MPLPPHPGHPGYINF.S			558.616	3	1673.83	1673.83	0	4.5	17	Non	441.45	398.17	398.17	6.54	1651	>sp|P02817|AMELX_BOVIN Amelogenin, X isoform OS=Bos taurus OX=9913 GN=AMELX PE=1 SV=2	1	hf1_10472_ebo_32_1_261219.ScanId;v=1;d1=2084.2084.3	controllerType=0 controllerNumber=1 scan=2084	10.9388
47579:3	1	S.MPLPPHPGHPGYINF.S			558.617	3	1673.84	1673.83	0	5.7	17	Non	442.92	429.89	429.89	6.82	1651	>sp|P02817|AMELX_BOVIN Amelogenin, X isoform OS=Bos taurus OX=9913 GN=AMELX PE=1 SV=2	1	hf1_10472_ebo_32_1_261219.ScanId;v=1;d1=34428.34428.3	controllerType=0 controllerNumber=1 scan=34428	68.9881
49145:2	1	S.MPLPPHPGHPGYINF.S			837.42	2	1673.83	1673.83	0	4.4	17	Non	443.56	429.23	429.23	6.49	1651	>sp|P02817|AMELX_BOVIN Amelogenin, X isoform OS=Bos taurus OX=9913 GN=AMELX PE=1 SV=2	1	hf1_10472_ebo_32_1_261219.ScanId;v=1;d1=35712.35712.3	controllerType=0 controllerNumber=1 scan=35712	71.8286
49713:3	1	S.MPLPPHPGHPGYINF.S			558.615	3	1673.83	1673.83	0	3	17	Non	445.1	445.1	445.1	6.6	1651	>sp|P02817|AMELX_BOVIN Amelogenin, X isoform OS=Bos taurus OX=9913 GN=AMELX PE=1 SV=2	1	hf1_10472_ebo_32_1_261219.ScanId;v=1;d1=36192.36192.3	controllerType=0 controllerNumber=1 scan=36192	72.977
00952:3	1	S.MPLPPHPGHPGYINF.S			558.616	3	1673.83	1673.83	0	4.5	17	Non	449.37	439.7	439.7	6.6	1651	>sp|P02817|AMELX_BOVIN Amelogenin, X isoform OS=Bos taurus OX=9913 GN=AMELX PE=1 SV=2	1	hf1_10472_ebo_32_1_261219.ScanId;v=1;d1=2344.2344.3	controllerType=0 controllerNumber=1 scan=2344	11.6245
22813:3	1	S.MPLPPHPGHPGYINF.S			558.617	3	1673.84	1673.83	0	6.9	17	Non	451.84	433.25	433.25	6.88	1651	>sp|P02817|AMELX_BOVIN Amelogenin, X isoform OS=Bos taurus OX=9913 GN=AMELX PE=1 SV=2	1	hf1_10472_ebo_32_1_261219.ScanId;v=1;d1=17574.17574.3	controllerType=0 controllerNumber=1 scan=17574	37.7341
01426:3	1	S.MPLPPHPGHPGYINF.S			558.616	3	1673.83	1673.83	0	4.9	17	Non	452.48	431.05	431.05	6.88	1651	>sp|P02817|AMELX_BOVIN Amelogenin, X isoform OS=Bos taurus OX=9913 GN=AMELX PE=1 SV=2	1	hf1_10472_ebo_32_1_261219.ScanId;v=1;d1=2689.2689.3	controllerType=0 controllerNumber=1 scan=2689	12.3044
48709:3	1	S.MPLPPHPGHPGYINF.S			558.615	3	1673.83	1673.83	0	2.3	17	Non	453.57	453.57	453.57	6.09	1651	>sp|P02817|AMELX_BOVIN Amelogenin, X isoform OS=Bos taurus OX=9913 GN=AMELX PE=1 SV=2	1	hf1_10472_ebo_32_1_261219.ScanId;v=1;d1=35365.35365.3	controllerType=0 controllerNumber=1 scan=35365	71.0559
48528:3	1	S.MPLPPHPGHPGYINF.S			558.616	3	1673.83	1673.83	0	4	17	Non	457.04	427.79	427.79	6.54	1651	>sp|P02817|AMELX_BOVIN Amelogenin, X isoform OS=Bos taurus OX=9913 GN=AMELX PE=1 SV=2	1	hf1_10472_ebo_32_1_261219.ScanId;v=1;d1=35213.35213.3	controllerType=0 controllerNumber=1 scan=35213	70.7049
25526:3	1	S.MPLPPHPGHPGYINF.S			558.616	3	1673.83	1673.83	0	3.9	17	Non	461.03	399.15	399.15	6.54	1651	>sp|P02817|AMELX_BOVIN Amelogenin, X isoform OS=Bos taurus OX=9913 GN=AMELX PE=1 SV=2	1	hf1_10472_ebo_32_1_261219.ScanId;v=1;d1=19375.19375.3	controllerType=0 controllerNumber=1 scan=19375	40.828
23383:3	1	S.MPLPPHPGHPGYINF.S			558.619	3	1673.84	1673.83	0	9.3	17	Non	474.4	414.22	414.22	6.66	1651	>sp|P02817|AMELX_BOVIN Amelogenin, X isoform OS=Bos taurus OX=9913 GN=AMELX PE=1 SV=2	1	hf1_10472_ebo_32_1_261219.ScanId;v=1;d1=17972.17972.3	controllerType=0 controllerNumber=1 scan=17972	38.4196
23097:3	1	S.MPLPPHPGHPGYINF.S			558.617	3	1673.84	1673.83	0	7.2	17	Non	476.39	453.85	453.85	6.66	1651	>sp|P02817|AMELX_BOVIN Amelogenin, X isoform OS=Bos taurus OX=9913 GN=AMELX PE=1 SV=2	1	hf1_10472_ebo_32_1_261219.ScanId;v=1;d1=17774.17774.3	controllerType=0 controllerNumber=1 scan=17774	38.0793
22064:2	1	S.MPLPPHPGHPGYINF.S			837.421	2	1673.83	1673.83	0	5.2	17	Non	617.46	513.58	513.58	9.01	1651	>sp|P02817|AMELX_BOVIN Amelogenin, X isoform OS=Bos taurus OX=9913 GN=AMELX PE=1 SV=2	1	hf1_10472_ebo_32_1_261219.ScanId;v=1;d1=17057.17057.2	controllerType=0 controllerNumber=1 scan=17057	36.8462
23509:2	1	S.MPLPPHPGHPGYINF.S			837.421	2	1673.84	1673.83	0	5.8	17	Non	623.63	514.2	514.2	9.01	1651	>sp|P02817|AMELX_BOVIN Amelogenin, X isoform OS=Bos taurus OX=9913 GN=AMELX PE=1 SV=2	1	hf1_10472_ebo_32_1_261219.ScanId;v=1;d1=18054.18054.2	controllerType=0 controllerNumber=1 scan=18054	38.563
22351:2	1	S.MPLPPHPGHPGYINF.S			837.422	2	1673.84	1673.83	0	6.1	17	Non	625.07	540.15	540.15	9.01	1651	>sp|P02817|AMELX_BOVIN Amelogenin, X isoform OS=Bos taurus OX=9913 GN=AMELX PE=1 SV=2	1	hf1_10472_ebo_32_1_261219.ScanId;v=1;d1=17257.17257.2	controllerType=0 controllerNumber=1 scan=17257	37.1897
23208:2	1	S.MPLPPHPGHPGYINF.S			837.421	2	1673.84	1673.83	0	5.6	17	Non	704.17	613.31	613.31	11.46	1651	>sp|P02817|AMELX_BOVIN Amelogenin, X isoform OS=Bos taurus OX=9913 GN=AMELX PE=1 SV=2	1	hf1_10472_ebo_32_1_261219.ScanId;v=1;d1=17851.17851.2	controllerType=0 controllerNumber=1 scan=17851	38.2147
22634:2	1	S.MPLPPHPGHPGYINF.S			837.421	2	1673.83	1673.83	0	5.4	17	Non	707.56	611.86	611.86	11.46	1651	>sp|P02817|AMELX_BOVIN Amelogenin, X isoform OS=Bos taurus OX=9913 GN=AMELX PE=1 SV=2	1	hf1_10472_ebo_32_1_261219.ScanId;v=1;d1=17454.17454.2	controllerType=0 controllerNumber=1 scan=17454	37.5289
22933:2	1	S.MPLPPHPGHPGYINF.S			837.42	2	1673.83	1673.83	0	4.8	17	Non	718	621.18	621.18	11.46	1651	>sp|P02817|AMELX_BOVIN Amelogenin, X isoform OS=Bos taurus OX=9913 GN=AMELX PE=1 SV=2	1	hf1_10472_ebo_32_1_261219.ScanId;v=1;d1=17656.17656.2	controllerType=0 controllerNumber=1 scan=17656	37.875
00505:3	1	S.MP[+15.995]LPPHPGHPGYINF.S		P[+16]	563.948	3	1689.83	1689.82	0	5	17	Non	58.4	58.4	4	1.48	1651	>sp|P02817|AMELX_BOVIN Amelogenin, X isoform OS=Bos taurus OX=9913 GN=AMELX PE=1 SV=2	1	hf1_10472_ebo_32_1_261219.ScanId;v=1;d1=1832.1832.3	controllerType=0 controllerNumber=1 scan=1832	9.7755
00757:2	1	S.MP[+15.995]LPPHPGHPGYINF.S		P[+16]	845.417	2	1689.83	1689.82	0	3.4	17	Non	67.82	67.82	4	2.34	1651	>sp|P02817|AMELX_BOVIN Amelogenin, X isoform OS=Bos taurus OX=9913 GN=AMELX PE=1 SV=2	1	hf1_10472_ebo_32_1_261219.ScanId;v=1;d1=2205.2205.2	controllerType=0 controllerNumber=1 scan=2205	11.3288
35543:3	1	S.MP[+15.995]LPPHPGHPGYINF.S		P[+16]	563.948	3	1689.83	1689.82	0	5.1	17	Non	71.04	71.04	4	1.48	1651	>sp|P02817|AMELX_BOVIN Amelogenin, X isoform OS=Bos taurus OX=9913 GN=AMELX PE=1 SV=2	1	hf1_10472_ebo_32_1_261219.ScanId;v=1;d1=26008.26008.3	controllerType=0 controllerNumber=1 scan=26008	52.274
45801:3	1	S.MP[+15.995]LPPHPGHPGYINF.S		P[+16]	563.948	3	1689.83	1689.82	0	4.7	17	Non	90.94	90.94	4	1.43	1651	>sp|P02817|AMELX_BOVIN Amelogenin, X isoform OS=Bos taurus OX=9913 GN=AMELX PE=1 SV=2	1	hf1_10472_ebo_32_1_261219.ScanId;v=1;d1=32640.32640.3	controllerType=0 controllerNumber=1 scan=32640	64.066
00085:3	1	S.MP[+15.995]LPPHPGHPGYINF.S		P[+16]	563.947	3	1689.83	1689.82	0	2.8	17	Non	108.83	108.83	4	2.3	1651	>sp|P02817|AMELX_BOVIN Amelogenin, X isoform OS=Bos taurus OX=9913 GN=AMELX PE=1 SV=2	1	hf1_10472_ebo_32_1_261219.ScanId;v=1;d1=370.370.3	controllerType=0 controllerNumber=1 scan=370	1.9467
44394:3	1	S.MP[+15.995]LPPHPGHPGYINF.S		P[+16]	563.948	3	1689.83	1689.82	0	5.4	17	Non	111.31	111.31	4	1.43	1651	>sp|P02817|AMELX_BOVIN Amelogenin, X isoform OS=Bos taurus OX=9913 GN=AMELX PE=1 SV=2	1	hf1_10472_ebo_32_1_261219.ScanId;v=1;d1=31738.31738.3	controllerType=0 controllerNumber=1 scan=31738	62.4588
00414:3	1	S.MP[+15.995]LPPHPGHPGYINF.S		P[+16]	563.947	3	1689.83	1689.82	0	4.3	17	Non	117.63	117.63	4	2.3	1651	>sp|P02817|AMELX_BOVIN Amelogenin, X isoform OS=Bos taurus OX=9913 GN=AMELX PE=1 SV=2	1	hf1_10472_ebo_32_1_261219.ScanId;v=1;d1=1457.1457.3	controllerType=0 controllerNumber=1 scan=1457	7.7412
00093:3	1	S.MP[+15.995]LPPHPGHPGYINF.S		P[+16]	563.949	3	1689.83	1689.82	0	7	17	Non	123.48	123.48	4	2.44	1651	>sp|P02817|AMELX_BOVIN Amelogenin, X isoform OS=Bos taurus OX=9913 GN=AMELX PE=1 SV=2	1	hf1_10472_ebo_32_1_261219.ScanId;v=1;d1=429.429.3	controllerType=0 controllerNumber=1 scan=429	2.2895
00375:3	1	S.MP[+15.995]LPPHPGHPGYINF.S		P[+16]	563.948	3	1689.83	1689.82	0	5.1	17	Non	128.44	128.44	4	2.53	1651	>sp|P02817|AMELX_BOVIN Amelogenin, X isoform OS=Bos taurus OX=9913 GN=AMELX PE=1 SV=2	1	hf1_10472_ebo_32_1_261219.ScanId;v=1;d1=1272.1272.3	controllerType=0 controllerNumber=1 scan=1272	6.7167
44708:3	1	S.MP[+15.995]LPPHPGHPGYINF.S		P[+16]	563.947	3	1689.83	1689.82	0	4.4	17	Non	130.7	130.7	4	2.29	1651	>sp|P02817|AMELX_BOVIN Amelogenin, X isoform OS=Bos taurus OX=9913 GN=AMELX PE=1 SV=2	1	hf1_10472_ebo_32_1_261219.ScanId;v=1;d1=31942.31942.3	controllerType=0 controllerNumber=1 scan=31942	62.8232
00450:3	1	S.MP[+15.995]LPPHPGHPGYINF.S		P[+16]	563.947	3	1689.83	1689.82	0	4.1	17	Non	138.72	138.72	4	2.42	1651	>sp|P02817|AMELX_BOVIN Amelogenin, X isoform OS=Bos taurus OX=9913 GN=AMELX PE=1 SV=2	1	hf1_10472_ebo_32_1_261219.ScanId;v=1;d1=1585.1585.3	controllerType=0 controllerNumber=1 scan=1585	8.4237
32280:3	1	S.MP[+15.995]LPPHPGHPGYINF.S		P[+16]	563.95	3	1689.83	1689.82	0	8	17	Non	143.55	143.55	5.8	2.44	1651	>sp|P02817|AMELX_BOVIN Amelogenin, X isoform OS=Bos taurus OX=9913 GN=AMELX PE=1 SV=2	1	hf1_10472_ebo_32_1_261219.ScanId;v=1;d1=23843.23843.3	controllerType=0 controllerNumber=1 scan=23843	48.4864
43301:3	1	S.MP[+15.995]LPPHPGHPGYINF.S		P[+16]	563.948	3	1689.83	1689.82	0	4.7	17	Non	152.21	152.21	4	2.53	1651	>sp|P02817|AMELX_BOVIN Amelogenin, X isoform OS=Bos taurus OX=9913 GN=AMELX PE=1 SV=2	1	hf1_10472_ebo_32_1_261219.ScanId;v=1;d1=31039.31039.3	controllerType=0 controllerNumber=1 scan=31039	61.2186
00399:3	1	S.MP[+15.995]LPPHPGHPGYINF.S		P[+16]	563.947	3	1689.83	1689.82	0	4	17	Non	160.21	160.21	4	2.42	1651	>sp|P02817|AMELX_BOVIN Amelogenin, X isoform OS=Bos taurus OX=9913 GN=AMELX PE=1 SV=2	1	hf1_10472_ebo_32_1_261219.ScanId;v=1;d1=1394.1394.3	controllerType=0 controllerNumber=1 scan=1394	7.3989
11605:3	1	S.MP[+15.995]LPPHPGHPGYINF.S		P[+16]	563.948	3	1689.83	1689.82	0	4.9	17	Non	162.21	162.21	5.8	2.3	1651	>sp|P02817|AMELX_BOVIN Amelogenin, X isoform OS=Bos taurus OX=9913 GN=AMELX PE=1 SV=2	1	hf1_10472_ebo_32_1_261219.ScanId;v=1;d1=9853.9853.3	controllerType=0 controllerNumber=1 scan=9853	24.3409
50151:3	1	S.MP[+15.995]LPPHPGHPGYINF.S		P[+16]	563.947	3	1689.83	1689.82	0	3	17	Non	165.63	165.63	4	2.97	1651	>sp|P02817|AMELX_BOVIN Amelogenin, X isoform OS=Bos taurus OX=9913 GN=AMELX PE=1 SV=2	1	hf1_10472_ebo_32_1_261219.ScanId;v=1;d1=36795.36795.3	controllerType=0 controllerNumber=1 scan=36795	75.3641
50127:3	1	S.MP[+15.995]LPPHPGHPGYINF.S		P[+16]	563.95	3	1689.83	1689.82	0	8.4	17	Non	169.65	169.65	4	3.02	1651	>sp|P02817|AMELX_BOVIN Amelogenin, X isoform OS=Bos taurus OX=9913 GN=AMELX PE=1 SV=2	1	hf1_10472_ebo_32_1_261219.ScanId;v=1;d1=36676.36676.3	controllerType=0 controllerNumber=1 scan=36676	74.6832
46532:3	1	S.MP[+15.995]LPPHPGHPGYINF.S		P[+16]	563.948	3	1689.83	1689.82	0	5.1	17	Non	172.87	172.87	4	3.21	1651	>sp|P02817|AMELX_BOVIN Amelogenin, X isoform OS=Bos taurus OX=9913 GN=AMELX PE=1 SV=2	1	hf1_10472_ebo_32_1_261219.ScanId;v=1;d1=33308.33308.3	controllerType=0 controllerNumber=1 scan=33308	65.7575
46443:3	1	S.MP[+15.995]LPPHPGHPGYINF.S		P[+16]	563.946	3	1689.82	1689.82	0	2.4	17	Non	182.06	182.06	4	3.31	1651	>sp|P02817|AMELX_BOVIN Amelogenin, X isoform OS=Bos taurus OX=9913 GN=AMELX PE=1 SV=2	1	hf1_10472_ebo_32_1_261219.ScanId;v=1;d1=33178.33178.3	controllerType=0 controllerNumber=1 scan=33178	65.2777
50175:3	1	S.MP[+15.995]LPPHPGHPGYINF.S		P[+16]	563.947	3	1689.83	1689.82	0	2.7	17	Non	184.46	184.46	4	3.31	1651	>sp|P02817|AMELX_BOVIN Amelogenin, X isoform OS=Bos taurus OX=9913 GN=AMELX PE=1 SV=2	1	hf1_10472_ebo_32_1_261219.ScanId;v=1;d1=36860.36860.3	controllerType=0 controllerNumber=1 scan=36860	75.702
50386:3	1	S.MP[+15.995]LPPHPGHPGYINF.S		P[+16]	563.946	3	1689.82	1689.82	0	2.2	17	Non	203.08	203.08	4	2.9	1651	>sp|P02817|AMELX_BOVIN Amelogenin, X isoform OS=Bos taurus OX=9913 GN=AMELX PE=1 SV=2	1	hf1_10472_ebo_32_1_261219.ScanId;v=1;d1=37289.37289.3	controllerType=0 controllerNumber=1 scan=37289	77.7452
00362:3	1	S.MP[+15.995]LPPHPGHPGYINF.S		P[+16]	563.948	3	1689.83	1689.82	0	6	17	Non	205.01	205.01	4	3.92	1651	>sp|P02817|AMELX_BOVIN Amelogenin, X isoform OS=Bos taurus OX=9913 GN=AMELX PE=1 SV=2	1	hf1_10472_ebo_32_1_261219.ScanId;v=1;d1=1212.1212.3	controllerType=0 controllerNumber=1 scan=1212	6.3815
00349:3	1	S.MP[+15.995]LPPHPGHPGYINF.S		P[+16]	563.949	3	1689.83	1689.82	0	7.2	17	Non	206.21	206.21	4	3.71	1651	>sp|P02817|AMELX_BOVIN Amelogenin, X isoform OS=Bos taurus OX=9913 GN=AMELX PE=1 SV=2	1	hf1_10472_ebo_32_1_261219.ScanId;v=1;d1=1151.1151.3	controllerType=0 controllerNumber=1 scan=1151	6.0408
00467:3	1	S.MP[+15.995]LPPHPGHPGYINF.S		P[+16]	563.947	3	1689.83	1689.82	0	4.4	17	Non	209.92	209.92	4	3.65	1651	>sp|P02817|AMELX_BOVIN Amelogenin, X isoform OS=Bos taurus OX=9913 GN=AMELX PE=1 SV=2	1	hf1_10472_ebo_32_1_261219.ScanId;v=1;d1=1648.1648.3	controllerType=0 controllerNumber=1 scan=1648	8.7639
49382:2	1	S.M[+15.995]PLPPHPGHPGYINF.S		M[+16]	845.417	2	1689.83	1689.82	0	3.2	17	Non	209.97	209.97	11.91	3.81	1651	>sp|P02817|AMELX_BOVIN Amelogenin, X isoform OS=Bos taurus OX=9913 GN=AMELX PE=1 SV=2	1	hf1_10472_ebo_32_1_261219.ScanId;v=1;d1=35905.35905.2	controllerType=0 controllerNumber=1 scan=35905	72.2762
28948:3	1	S.MP[+15.995]LPPHPGHPGYINF.S		P[+16]	563.949	3	1689.83	1689.82	0	7.2	17	Non	210.48	210.48	5.8	3.34	1651	>sp|P02817|AMELX_BOVIN Amelogenin, X isoform OS=Bos taurus OX=9913 GN=AMELX PE=1 SV=2	1	hf1_10472_ebo_32_1_261219.ScanId;v=1;d1=21656.21656.4	controllerType=0 controllerNumber=1 scan=21656	44.703
00313:3	1	S.MP[+15.995]LPPHPGHPGYINF.S		P[+16]	563.949	3	1689.83	1689.82	0	7.4	17	Non	211.79	211.79	4	3.71	1651	>sp|P02817|AMELX_BOVIN Amelogenin, X isoform OS=Bos taurus OX=9913 GN=AMELX PE=1 SV=2	1	hf1_10472_ebo_32_1_261219.ScanId;v=1;d1=1028.1028.3	controllerType=0 controllerNumber=1 scan=1028	5.3626
23145:3	1	S.MP[+31.990]LPPHPGHPGYINF.S		P[+32]	569.278	3	1705.82	1705.82	0	2.4	17	Non	225.12	225.12	1.8	2.67	1651	>sp|P02817|AMELX_BOVIN Amelogenin, X isoform OS=Bos taurus OX=9913 GN=AMELX PE=1 SV=2	1	hf1_10472_ebo_32_1_261219.ScanId;v=1;d1=17806.17806.3	controllerType=0 controllerNumber=1 scan=17806	38.1333
50353:3	1	S.MP[+15.995]LPPHPGHPGYINF.S		P[+16]	563.949	3	1689.83	1689.82	0	6.6	17	Non	240.4	240.4	5.8	4.76	1651	>sp|P02817|AMELX_BOVIN Amelogenin, X isoform OS=Bos taurus OX=9913 GN=AMELX PE=1 SV=2	1	hf1_10472_ebo_32_1_261219.ScanId;v=1;d1=37219.37219.3	controllerType=0 controllerNumber=1 scan=37219	77.4027
03375:3	1	S.MP[+15.995]LPPHPGHPGYINF.S		P[+16]	563.946	3	1689.82	1689.82	0	1.9	17	Non	244.54	244.54	4	3.98	1651	>sp|P02817|AMELX_BOVIN Amelogenin, X isoform OS=Bos taurus OX=9913 GN=AMELX PE=1 SV=2	1	hf1_10472_ebo_32_1_261219.ScanId;v=1;d1=4053.4053.3	controllerType=0 controllerNumber=1 scan=4053	14.548
00295:3	1	S.MP[+15.995]LPPHPGHPGYINF.S		P[+16]	563.949	3	1689.83	1689.82	0	7.5	17	Non	247.88	247.88	4	4.88	1651	>sp|P02817|AMELX_BOVIN Amelogenin, X isoform OS=Bos taurus OX=9913 GN=AMELX PE=1 SV=2	1	hf1_10472_ebo_32_1_261219.ScanId;v=1;d1=966.966.3	controllerType=0 controllerNumber=1 scan=966	5.0226
00238:3	1	S.MP[+15.995]LPPHPGHPGYINF.S		P[+16]	563.949	3	1689.83	1689.82	0	7.2	17	Non	252.79	252.79	4	4.88	1651	>sp|P02817|AMELX_BOVIN Amelogenin, X isoform OS=Bos taurus OX=9913 GN=AMELX PE=1 SV=2	1	hf1_10472_ebo_32_1_261219.ScanId;v=1;d1=777.777.3	controllerType=0 controllerNumber=1 scan=777	4.0004
21139:3	1	S.MP[+15.995]LPPHPGHPGYINF.S		P[+16]	563.949	3	1689.83	1689.82	0	6.3	17	Non	252.88	252.88	5.8	5.09	1651	>sp|P02817|AMELX_BOVIN Amelogenin, X isoform OS=Bos taurus OX=9913 GN=AMELX PE=1 SV=2	1	hf1_10472_ebo_32_1_261219.ScanId;v=1;d1=16427.16427.3	controllerType=0 controllerNumber=1 scan=16427	35.7582
20565:3	1	S.MP[+15.995]LPPHPGHPGYINF.S		P[+16]	563.95	3	1689.84	1689.82	0	9	17	Non	255.41	255.41	4	4.88	1651	>sp|P02817|AMELX_BOVIN Amelogenin, X isoform OS=Bos taurus OX=9913 GN=AMELX PE=1 SV=2	1	hf1_10472_ebo_32_1_261219.ScanId;v=1;d1=16027.16027.3	controllerType=0 controllerNumber=1 scan=16027	35.0607
20846:3	1	S.MP[+15.995]LPPHPGHPGYINF.S		P[+16]	563.95	3	1689.84	1689.82	0	9	17	Non	257.18	257.18	4	4.88	1651	>sp|P02817|AMELX_BOVIN Amelogenin, X isoform OS=Bos taurus OX=9913 GN=AMELX PE=1 SV=2	1	hf1_10472_ebo_32_1_261219.ScanId;v=1;d1=16225.16225.3	controllerType=0 controllerNumber=1 scan=16225	35.4065
23541:2	1	S.MP[+31.990]LPPHPGHPGYINF.S		P[+32]	853.415	2	1705.82	1705.82	0	4.4	17	Non	257.89	257.89	0.6	4.64	1651	>sp|P02817|AMELX_BOVIN Amelogenin, X isoform OS=Bos taurus OX=9913 GN=AMELX PE=1 SV=2	1	hf1_10472_ebo_32_1_261219.ScanId;v=1;d1=18074.18074.2	controllerType=0 controllerNumber=1 scan=18074	38.594
22660:3	1	S.MPLPPHPGHP[+15.995]GYINF.S		P[+16]	563.947	3	1689.83	1689.82	0	3.7	17	Non	264.88	264.88	7.06	4.43	1651	>sp|P02817|AMELX_BOVIN Amelogenin, X isoform OS=Bos taurus OX=9913 GN=AMELX PE=1 SV=2	1	hf1_10472_ebo_32_1_261219.ScanId;v=1;d1=17473.17473.3	controllerType=0 controllerNumber=1 scan=17473	37.5605
49954:3	1	S.MPLPP[+31.990]HPGHPGYINF.S		P[+32]	569.281	3	1705.83	1705.82	0	7.9	17	Non	265.02	265.02	5.17	4.49	1651	>sp|P02817|AMELX_BOVIN Amelogenin, X isoform OS=Bos taurus OX=9913 GN=AMELX PE=1 SV=2	1	hf1_10472_ebo_32_1_261219.ScanId;v=1;d1=36392.36392.3	controllerType=0 controllerNumber=1 scan=36392	73.4493
17492:3	1	S.MP[+15.995]LPPHPGHPGYINF.S		P[+16]	563.949	3	1689.83	1689.82	0	6.9	17	Non	269.82	269.82	7.91	5.09	1651	>sp|P02817|AMELX_BOVIN Amelogenin, X isoform OS=Bos taurus OX=9913 GN=AMELX PE=1 SV=2	1	hf1_10472_ebo_32_1_261219.ScanId;v=1;d1=13856.13856.3	controllerType=0 controllerNumber=1 scan=13856	31.2995
18906:3	1	S.M[+15.995]PLPPHPGHPGYINF.S		M[+16]	563.95	3	1689.84	1689.82	0	9	17	Non	283.94	283.94	11.73	5.14	1651	>sp|P02817|AMELX_BOVIN Amelogenin, X isoform OS=Bos taurus OX=9913 GN=AMELX PE=1 SV=2	1	hf1_10472_ebo_32_1_261219.ScanId;v=1;d1=14850.14850.3	controllerType=0 controllerNumber=1 scan=14850	33.0125
00220:3	1	S.MP[+15.995]LPPHPGHPGYINF.S		P[+16]	563.949	3	1689.83	1689.82	0	6.6	17	Non	285.23	285.23	4	5.31	1651	>sp|P02817|AMELX_BOVIN Amelogenin, X isoform OS=Bos taurus OX=9913 GN=AMELX PE=1 SV=2	1	hf1_10472_ebo_32_1_261219.ScanId;v=1;d1=715.715.3	controllerType=0 controllerNumber=1 scan=715	3.6594
25674:2	1	S.MPLPPHPGHPGYIN[+0.984]F.S		N[+1]	837.912	2	1674.82	1674.81	0	4.3	17	Non	285.71	285.71	285.71	4.91	1651	>sp|P02817|AMELX_BOVIN Amelogenin, X isoform OS=Bos taurus OX=9913 GN=AMELX PE=1 SV=2	1	hf1_10472_ebo_32_1_261219.ScanId;v=1;d1=19469.19469.2	controllerType=0 controllerNumber=1 scan=19469	40.9876
19188:3	1	S.MP[+15.995]LPPHPGHPGYINF.S		P[+16]	563.95	3	1689.84	1689.82	0	9.3	17	Non	298	298	4	4.62	1651	>sp|P02817|AMELX_BOVIN Amelogenin, X isoform OS=Bos taurus OX=9913 GN=AMELX PE=1 SV=2	1	hf1_10472_ebo_32_1_261219.ScanId;v=1;d1=15042.15042.3	controllerType=0 controllerNumber=1 scan=15042	33.3527
19841:3	1	S.M[+31.990]PLPPHPGHPGYINF.S		M[+32]	569.278	3	1705.82	1705.82	0	2.4	17	Non	300.58	300.58	0	5.08	1651	>sp|P02817|AMELX_BOVIN Amelogenin, X isoform OS=Bos taurus OX=9913 GN=AMELX PE=1 SV=2	1	hf1_10472_ebo_32_1_261219.ScanId;v=1;d1=15520.15520.3	controllerType=0 controllerNumber=1 scan=15520	34.1915
25474:3	1	S.MP[+15.995]LPPHPGHPGYINF.S		P[+16]	563.947	3	1689.83	1689.82	0	3.7	17	Non	302.29	302.29	5.8	5.08	1651	>sp|P02817|AMELX_BOVIN Amelogenin, X isoform OS=Bos taurus OX=9913 GN=AMELX PE=1 SV=2	1	hf1_10472_ebo_32_1_261219.ScanId;v=1;d1=19339.19339.3	controllerType=0 controllerNumber=1 scan=19339	40.7659
24126:3	1	S.MP[+15.995]LPPHPGHPGYINF.S		P[+16]	563.947	3	1689.83	1689.82	0	3.8	17	Non	303.56	285.49	5.8	5.08	1651	>sp|P02817|AMELX_BOVIN Amelogenin, X isoform OS=Bos taurus OX=9913 GN=AMELX PE=1 SV=2	1	hf1_10472_ebo_32_1_261219.ScanId;v=1;d1=18474.18474.3	controllerType=0 controllerNumber=1 scan=18474	39.2863
49252:3	1	S.MP[+15.995]LPPHPGHPGYINF.S		P[+16]	563.946	3	1689.82	1689.82	0	1.5	17	Non	315.03	315.03	4	4.63	1651	>sp|P02817|AMELX_BOVIN Amelogenin, X isoform OS=Bos taurus OX=9913 GN=AMELX PE=1 SV=2	1	hf1_10472_ebo_32_1_261219.ScanId;v=1;d1=35797.35797.3	controllerType=0 controllerNumber=1 scan=35797	72.0193
23820:3	1	S.MP[+15.995]LPPHPGHPGYINF.S		P[+16]	563.947	3	1689.83	1689.82	0	2.6	17	Non	318.02	318.02	1	4.7	1651	>sp|P02817|AMELX_BOVIN Amelogenin, X isoform OS=Bos taurus OX=9913 GN=AMELX PE=1 SV=2	1	hf1_10472_ebo_32_1_261219.ScanId;v=1;d1=18270.18270.3	controllerType=0 controllerNumber=1 scan=18270	38.9345
48857:3	1	S.MP[+15.995]LPPHPGHPGYINF.S		P[+16]	563.948	3	1689.83	1689.82	0	5.4	17	Non	322.24	322.24	4	5.6	1651	>sp|P02817|AMELX_BOVIN Amelogenin, X isoform OS=Bos taurus OX=9913 GN=AMELX PE=1 SV=2	1	hf1_10472_ebo_32_1_261219.ScanId;v=1;d1=35485.35485.3	controllerType=0 controllerNumber=1 scan=35485	71.3383
49572:3	1	S.MP[+15.995]LPPHPGHPGYINF.S		P[+16]	563.948	3	1689.83	1689.82	0	5.6	17	Non	330.11	330.11	4	5.6	1651	>sp|P02817|AMELX_BOVIN Amelogenin, X isoform OS=Bos taurus OX=9913 GN=AMELX PE=1 SV=2	1	hf1_10472_ebo_32_1_261219.ScanId;v=1;d1=36076.36076.3	controllerType=0 controllerNumber=1 scan=36076	72.6971
21729:3	1	S.MPLP[+15.995]PHPGHPGYINF.S		P[+16]	563.948	3	1689.83	1689.82	0	5.3	17	Non	336.42	336.42	13.11	5.64	1651	>sp|P02817|AMELX_BOVIN Amelogenin, X isoform OS=Bos taurus OX=9913 GN=AMELX PE=1 SV=2	1	hf1_10472_ebo_32_1_261219.ScanId;v=1;d1=16828.16828.3	controllerType=0 controllerNumber=1 scan=16828	36.4504
00275:3	1	S.MP[+15.995]LPPHPGHPGYINF.S		P[+16]	563.949	3	1689.83	1689.82	0	7.8	17	Non	336.67	336.67	4	5.65	1651	>sp|P02817|AMELX_BOVIN Amelogenin, X isoform OS=Bos taurus OX=9913 GN=AMELX PE=1 SV=2	1	hf1_10472_ebo_32_1_261219.ScanId;v=1;d1=903.903.3	controllerType=0 controllerNumber=1 scan=903	4.6819
00592:3	1	S.MP[+15.995]LPPHPGHPGYINF.S		P[+16]	563.948	3	1689.83	1689.82	0	4.5	17	Non	336.9	336.9	4	5.32	1651	>sp|P02817|AMELX_BOVIN Amelogenin, X isoform OS=Bos taurus OX=9913 GN=AMELX PE=1 SV=2	1	hf1_10472_ebo_32_1_261219.ScanId;v=1;d1=2035.2035.3	controllerType=0 controllerNumber=1 scan=2035	10.7878
49537:2	1	S.M[+15.995]PLPPHPGHPGYINF.S		M[+16]	845.419	2	1689.83	1689.82	0	6	17	Non	341.1	341.1	23.46	6.08	1651	>sp|P02817|AMELX_BOVIN Amelogenin, X isoform OS=Bos taurus OX=9913 GN=AMELX PE=1 SV=2	1	hf1_10472_ebo_32_1_261219.ScanId;v=1;d1=36047.36047.2	controllerType=0 controllerNumber=1 scan=36047	72.6266
49743:3	1	S.MP[+15.995]LPPHPGHPGYINF.S		P[+16]	563.948	3	1689.83	1689.82	0	5.7	17	Non	341.17	341.17	4	5.6	1651	>sp|P02817|AMELX_BOVIN Amelogenin, X isoform OS=Bos taurus OX=9913 GN=AMELX PE=1 SV=2	1	hf1_10472_ebo_32_1_261219.ScanId;v=1;d1=36217.36217.3	controllerType=0 controllerNumber=1 scan=36217	73.0331
48905:2	1	S.M[+15.995]PLPPHPGHPGYINF.S		M[+16]	845.418	2	1689.83	1689.82	0	4.4	17	Non	341.32	341.32	16.3	5.8	1651	>sp|P02817|AMELX_BOVIN Amelogenin, X isoform OS=Bos taurus OX=9913 GN=AMELX PE=1 SV=2	1	hf1_10472_ebo_32_1_261219.ScanId;v=1;d1=35520.35520.2	controllerType=0 controllerNumber=1 scan=35520	71.415
47174:3	1	S.MP[+15.995]LPPHPGHPGYINF.S		P[+16]	563.948	3	1689.83	1689.82	0	5.9	17	Non	343.29	343.29	5.8	5.6	1651	>sp|P02817|AMELX_BOVIN Amelogenin, X isoform OS=Bos taurus OX=9913 GN=AMELX PE=1 SV=2	1	hf1_10472_ebo_32_1_261219.ScanId;v=1;d1=34090.34090.3	controllerType=0 controllerNumber=1 scan=34090	68.2416
46900:3	1	S.MP[+15.995]LPPHPGHPGYINF.S		P[+16]	563.948	3	1689.83	1689.82	0	5.6	17	Non	345.18	345.18	4	5.6	1651	>sp|P02817|AMELX_BOVIN Amelogenin, X isoform OS=Bos taurus OX=9913 GN=AMELX PE=1 SV=2	1	hf1_10472_ebo_32_1_261219.ScanId;v=1;d1=33827.33827.3	controllerType=0 controllerNumber=1 scan=33827	67.5558
25789:3	1	S.MP[+15.995]LPPHPGHPGYINF.S		P[+16]	563.947	3	1689.83	1689.82	0	4.1	17	Non	347.32	347.32	5.8	5.37	1651	>sp|P02817|AMELX_BOVIN Amelogenin, X isoform OS=Bos taurus OX=9913 GN=AMELX PE=1 SV=2	1	hf1_10472_ebo_32_1_261219.ScanId;v=1;d1=19542.19542.3	controllerType=0 controllerNumber=1 scan=19542	41.1135
47172:2	1	S.M[+15.995]PLPPHPGHPGYINF.S		M[+16]	845.419	2	1689.83	1689.82	0	5.8	17	Non	348.73	348.73	18.69	5.81	1651	>sp|P02817|AMELX_BOVIN Amelogenin, X isoform OS=Bos taurus OX=9913 GN=AMELX PE=1 SV=2	1	hf1_10472_ebo_32_1_261219.ScanId;v=1;d1=34088.34088.2	controllerType=0 controllerNumber=1 scan=34088	68.2358
20275:3	1	S.MP[+15.995]LPPHPGHPGYINF.S		P[+16]	563.951	3	1689.84	1689.82	0	10	17	Non	349.54	349.54	4	5.12	1651	>sp|P02817|AMELX_BOVIN Amelogenin, X isoform OS=Bos taurus OX=9913 GN=AMELX PE=1 SV=2	1	hf1_10472_ebo_32_1_261219.ScanId;v=1;d1=15826.15826.3	controllerType=0 controllerNumber=1 scan=15826	34.7198
19721:3	1	S.MP[+15.995]LPPHPGHPGYINF.S		P[+16]	563.95	3	1689.83	1689.82	0	8.2	17	Non	350.71	350.71	2.84	5.65	1651	>sp|P02817|AMELX_BOVIN Amelogenin, X isoform OS=Bos taurus OX=9913 GN=AMELX PE=1 SV=2	1	hf1_10472_ebo_32_1_261219.ScanId;v=1;d1=15428.15428.3	controllerType=0 controllerNumber=1 scan=15428	34.0298
20131:3	1	S.M[+31.990]PLPPHPGHPGYINF.S		M[+32]	569.278	3	1705.82	1705.82	0	2.9	17	Non	351.38	351.38	8.35	5.37	1651	>sp|P02817|AMELX_BOVIN Amelogenin, X isoform OS=Bos taurus OX=9913 GN=AMELX PE=1 SV=2	1	hf1_10472_ebo_32_1_261219.ScanId;v=1;d1=15719.15719.3	controllerType=0 controllerNumber=1 scan=15719	34.54
46806:3	1	S.MP[+15.995]LPPHPGHPGYINF.S		P[+16]	563.947	3	1689.83	1689.82	0	2.7	17	Non	352.58	352.58	4	5.32	1651	>sp|P02817|AMELX_BOVIN Amelogenin, X isoform OS=Bos taurus OX=9913 GN=AMELX PE=1 SV=2	1	hf1_10472_ebo_32_1_261219.ScanId;v=1;d1=33720.33720.3	controllerType=0 controllerNumber=1 scan=33720	67.2116
49422:3	1	S.MP[+15.995]LPPHPGHPGYINF.S		P[+16]	563.948	3	1689.83	1689.82	0	5.6	17	Non	353.67	353.67	4	5.6	1651	>sp|P02817|AMELX_BOVIN Amelogenin, X isoform OS=Bos taurus OX=9913 GN=AMELX PE=1 SV=2	1	hf1_10472_ebo_32_1_261219.ScanId;v=1;d1=35942.35942.3	controllerType=0 controllerNumber=1 scan=35942	72.3566
24787:3	1	S.MP[+15.995]LPPHPGHPGYINF.S		P[+16]	563.948	3	1689.83	1689.82	0	5.3	17	Non	354.15	344.58	5.8	5.64	1651	>sp|P02817|AMELX_BOVIN Amelogenin, X isoform OS=Bos taurus OX=9913 GN=AMELX PE=1 SV=2	1	hf1_10472_ebo_32_1_261219.ScanId;v=1;d1=18892.18892.3	controllerType=0 controllerNumber=1 scan=18892	40.0025
46729:3	1	S.MP[+15.995]LPPHPGHPGYINF.S		P[+16]	563.946	3	1689.82	1689.82	0	1.8	17	Non	354.73	354.73	4	4.86	1651	>sp|P02817|AMELX_BOVIN Amelogenin, X isoform OS=Bos taurus OX=9913 GN=AMELX PE=1 SV=2	1	hf1_10472_ebo_32_1_261219.ScanId;v=1;d1=33619.33619.3	controllerType=0 controllerNumber=1 scan=33619	66.8665
50289:3	1	S.MP[+15.995]LPPHPGHPGYINF.S		P[+16]	563.948	3	1689.83	1689.82	0	4.7	17	Non	357.87	357.87	4	5.86	1651	>sp|P02817|AMELX_BOVIN Amelogenin, X isoform OS=Bos taurus OX=9913 GN=AMELX PE=1 SV=2	1	hf1_10472_ebo_32_1_261219.ScanId;v=1;d1=37079.37079.3	controllerType=0 controllerNumber=1 scan=37079	76.7224
27374:3	1	S.MP[+15.995]LPPHPGHPGYINF.S		P[+16]	563.948	3	1689.83	1689.82	0	5.4	17	Non	365.47	365.47	5.8	6.52	1651	>sp|P02817|AMELX_BOVIN Amelogenin, X isoform OS=Bos taurus OX=9913 GN=AMELX PE=1 SV=2	1	hf1_10472_ebo_32_1_261219.ScanId;v=1;d1=20600.20600.3	controllerType=0 controllerNumber=1 scan=20600	42.907
23796:2	1	S.M[+15.995]PLPPHPGHPGYINF.S		M[+16]	845.417	2	1689.83	1689.82	0	3.7	17	Non	366.01	295.46	22.95	5.46	1651	>sp|P02817|AMELX_BOVIN Amelogenin, X isoform OS=Bos taurus OX=9913 GN=AMELX PE=1 SV=2	1	hf1_10472_ebo_32_1_261219.ScanId;v=1;d1=18253.18253.2	controllerType=0 controllerNumber=1 scan=18253	38.9043
46650:3	1	S.MP[+15.995]LPPHPGHPGYINF.S		P[+16]	563.946	3	1689.82	1689.82	0	1.4	17	Non	366.15	366.15	4	5.74	1651	>sp|P02817|AMELX_BOVIN Amelogenin, X isoform OS=Bos taurus OX=9913 GN=AMELX PE=1 SV=2	1	hf1_10472_ebo_32_1_261219.ScanId;v=1;d1=33511.33511.3	controllerType=0 controllerNumber=1 scan=33511	66.5223
48675:3	1	S.MP[+15.995]LPPHPGHPGYINF.S		P[+16]	563.946	3	1689.82	1689.82	0	2.1	17	Non	371.83	371.83	4	6.01	1651	>sp|P02817|AMELX_BOVIN Amelogenin, X isoform OS=Bos taurus OX=9913 GN=AMELX PE=1 SV=2	1	hf1_10472_ebo_32_1_261219.ScanId;v=1;d1=35338.35338.3	controllerType=0 controllerNumber=1 scan=35338	70.9943
19446:3	1	S.MP[+15.995]LPPHPGHPGYINF.S		P[+16]	563.95	3	1689.83	1689.82	0	8.2	17	Non	371.99	371.99	4	6.52	1651	>sp|P02817|AMELX_BOVIN Amelogenin, X isoform OS=Bos taurus OX=9913 GN=AMELX PE=1 SV=2	1	hf1_10472_ebo_32_1_261219.ScanId;v=1;d1=15232.15232.3	controllerType=0 controllerNumber=1 scan=15232	33.6897
01073:3	1	S.MP[+15.995]LPPHPGHPGYINF.S		P[+16]	563.947	3	1689.83	1689.82	0	3.3	17	Non	372.31	372.31	4	6.46	1651	>sp|P02817|AMELX_BOVIN Amelogenin, X isoform OS=Bos taurus OX=9913 GN=AMELX PE=1 SV=2	1	hf1_10472_ebo_32_1_261219.ScanId;v=1;d1=2433.2433.3	controllerType=0 controllerNumber=1 scan=2433	11.8154
47037:3	1	S.MP[+15.995]LPPHPGHPGYINF.S		P[+16]	563.948	3	1689.83	1689.82	0	4.9	17	Non	373.75	373.75	4	6.74	1651	>sp|P02817|AMELX_BOVIN Amelogenin, X isoform OS=Bos taurus OX=9913 GN=AMELX PE=1 SV=2	1	hf1_10472_ebo_32_1_261219.ScanId;v=1;d1=33957.33957.3	controllerType=0 controllerNumber=1 scan=33957	67.8994
48305:3	1	S.MP[+15.995]LPPHPGHPGYINF.S		P[+16]	563.948	3	1689.83	1689.82	0	5	17	Non	375.24	375.24	4	6.47	1651	>sp|P02817|AMELX_BOVIN Amelogenin, X isoform OS=Bos taurus OX=9913 GN=AMELX PE=1 SV=2	1	hf1_10472_ebo_32_1_261219.ScanId;v=1;d1=35034.35034.3	controllerType=0 controllerNumber=1 scan=35034	70.3103
47916:3	1	S.MP[+15.995]LPPHPGHPGYINF.S		P[+16]	563.948	3	1689.83	1689.82	0	5.4	17	Non	377.42	377.42	4	6.47	1651	>sp|P02817|AMELX_BOVIN Amelogenin, X isoform OS=Bos taurus OX=9913 GN=AMELX PE=1 SV=2	1	hf1_10472_ebo_32_1_261219.ScanId;v=1;d1=34709.34709.3	controllerType=0 controllerNumber=1 scan=34709	69.6171
00861:3	1	S.MP[+15.995]LPPHPGHPGYINF.S		P[+16]	563.947	3	1689.83	1689.82	0	4.3	17	Non	379.07	379.07	4	6.46	1651	>sp|P02817|AMELX_BOVIN Amelogenin, X isoform OS=Bos taurus OX=9913 GN=AMELX PE=1 SV=2	1	hf1_10472_ebo_32_1_261219.ScanId;v=1;d1=2279.2279.3	controllerType=0 controllerNumber=1 scan=2279	11.4763
50325:3	1	S.MP[+15.995]LPPHPGHPGYINF.S		P[+16]	563.948	3	1689.83	1689.82	0	5.2	17	Non	380.71	380.71	4	6.74	1651	>sp|P02817|AMELX_BOVIN Amelogenin, X isoform OS=Bos taurus OX=9913 GN=AMELX PE=1 SV=2	1	hf1_10472_ebo_32_1_261219.ScanId;v=1;d1=37152.37152.3	controllerType=0 controllerNumber=1 scan=37152	77.0618
48909:2	1	S.M[+15.995]PLPPHPGHPGYINF.S		M[+16]	845.418	2	1689.83	1689.82	0	4.4	17	Non	382.34	382.34	39.61	6.74	1651	>sp|P02817|AMELX_BOVIN Amelogenin, X isoform OS=Bos taurus OX=9913 GN=AMELX PE=1 SV=2	1	hf1_10472_ebo_32_1_261219.ScanId;v=1;d1=35522.35522.2	controllerType=0 controllerNumber=1 scan=35522	71.4206
48495:3	1	S.MP[+15.995]LPPHPGHPGYINF.S		P[+16]	563.946	3	1689.82	1689.82	0	2.4	17	Non	382.4	382.4	4	6.46	1651	>sp|P02817|AMELX_BOVIN Amelogenin, X isoform OS=Bos taurus OX=9913 GN=AMELX PE=1 SV=2	1	hf1_10472_ebo_32_1_261219.ScanId;v=1;d1=35187.35187.3	controllerType=0 controllerNumber=1 scan=35187	70.6483
49056:3	1	S.MP[+15.995]LPPHPGHPGYINF.S		P[+16]	563.948	3	1689.83	1689.82	0	5.8	17	Non	382.74	382.74	5.8	6.74	1651	>sp|P02817|AMELX_BOVIN Amelogenin, X isoform OS=Bos taurus OX=9913 GN=AMELX PE=1 SV=2	1	hf1_10472_ebo_32_1_261219.ScanId;v=1;d1=35644.35644.3	controllerType=0 controllerNumber=1 scan=35644	71.6745
19988:3	1	S.MP[+15.995]LPPHPGHPGYINF.S		P[+16]	563.95	3	1689.84	1689.82	0	9.1	17	Non	382.9	382.9	4	6.52	1651	>sp|P02817|AMELX_BOVIN Amelogenin, X isoform OS=Bos taurus OX=9913 GN=AMELX PE=1 SV=2	1	hf1_10472_ebo_32_1_261219.ScanId;v=1;d1=15623.15623.3	controllerType=0 controllerNumber=1 scan=15623	34.3712
49875:2	1	S.MP[+15.995]LPPHPGHPGYINF.S		P[+16]	845.421	2	1689.83	1689.82	0	8	17	Non	384.19	384.19	4	6.47	1651	>sp|P02817|AMELX_BOVIN Amelogenin, X isoform OS=Bos taurus OX=9913 GN=AMELX PE=1 SV=2	1	hf1_10472_ebo_32_1_261219.ScanId;v=1;d1=36333.36333.2	controllerType=0 controllerNumber=1 scan=36333	73.3297
27142:3	1	S.MPLPPHPGHPGYIN[+0.984]F.S		N[+1]	558.944	3	1674.82	1674.81	0	5.5	17	Non	387.34	387.34	387.34	6.47	1651	>sp|P02817|AMELX_BOVIN Amelogenin, X isoform OS=Bos taurus OX=9913 GN=AMELX PE=1 SV=2	1	hf1_10472_ebo_32_1_261219.ScanId;v=1;d1=20446.20446.3	controllerType=0 controllerNumber=1 scan=20446	42.6448
49897:3	1	S.MP[+15.995]LPPHPGHPGYINF.S		P[+16]	563.948	3	1689.83	1689.82	0	4.6	17	Non	387.49	387.49	5.8	6.46	1651	>sp|P02817|AMELX_BOVIN Amelogenin, X isoform OS=Bos taurus OX=9913 GN=AMELX PE=1 SV=2	1	hf1_10472_ebo_32_1_261219.ScanId;v=1;d1=36352.36352.3	controllerType=0 controllerNumber=1 scan=36352	73.3725
47738:3	1	S.MP[+15.995]LPPHPGHPGYINF.S		P[+16]	563.948	3	1689.83	1689.82	0	5.3	17	Non	388.77	388.77	4	6.74	1651	>sp|P02817|AMELX_BOVIN Amelogenin, X isoform OS=Bos taurus OX=9913 GN=AMELX PE=1 SV=2	1	hf1_10472_ebo_32_1_261219.ScanId;v=1;d1=34562.34562.3	controllerType=0 controllerNumber=1 scan=34562	69.2759
49714:2	1	S.M[+15.995]PLPPHPGHPGYINF.S		M[+16]	845.419	2	1689.83	1689.82	0	5.6	17	Non	390.05	387.04	30.24	6.96	1651	>sp|P02817|AMELX_BOVIN Amelogenin, X isoform OS=Bos taurus OX=9913 GN=AMELX PE=1 SV=2	1	hf1_10472_ebo_32_1_261219.ScanId;v=1;d1=36193.36193.2	controllerType=0 controllerNumber=1 scan=36193	72.9786
49116:2	1	S.M[+15.995]PLPPHPGHPGYINF.S		M[+16]	845.418	2	1689.83	1689.82	0	4.9	17	Non	390.55	389.17	29.7	6.96	1651	>sp|P02817|AMELX_BOVIN Amelogenin, X isoform OS=Bos taurus OX=9913 GN=AMELX PE=1 SV=2	1	hf1_10472_ebo_32_1_261219.ScanId;v=1;d1=35689.35689.2	controllerType=0 controllerNumber=1 scan=35689	71.7719
47352:3	1	S.MP[+15.995]LPPHPGHPGYINF.S		P[+16]	563.946	3	1689.82	1689.82	0	2.3	17	Non	391.67	391.67	4	6.01	1651	>sp|P02817|AMELX_BOVIN Amelogenin, X isoform OS=Bos taurus OX=9913 GN=AMELX PE=1 SV=2	1	hf1_10472_ebo_32_1_261219.ScanId;v=1;d1=34242.34242.3	controllerType=0 controllerNumber=1 scan=34242	68.5874
25358:2	1	S.MPLPPHPGHPGYIN[+0.984]F.S		N[+1]	837.916	2	1674.82	1674.81	0	9	17	Non	393.1	362.53	362.53	6.52	1651	>sp|P02817|AMELX_BOVIN Amelogenin, X isoform OS=Bos taurus OX=9913 GN=AMELX PE=1 SV=2	1	hf1_10472_ebo_32_1_261219.ScanId;v=1;d1=19264.19264.2	controllerType=0 controllerNumber=1 scan=19264	40.6401
49318:2	1	S.M[+15.995]PLPPHPGHPGYINF.S		M[+16]	845.419	2	1689.83	1689.82	0	5.6	17	Non	393.65	393.65	25.08	7.01	1651	>sp|P02817|AMELX_BOVIN Amelogenin, X isoform OS=Bos taurus OX=9913 GN=AMELX PE=1 SV=2	1	hf1_10472_ebo_32_1_261219.ScanId;v=1;d1=35850.35850.2	controllerType=0 controllerNumber=1 scan=35850	72.1459
20425:3	1	S.M[+31.990]PLPPHPGHPGYINF.S		M[+32]	569.279	3	1705.82	1705.82	0	3.6	17	Non	399.86	399.86	8.48	6.2	1651	>sp|P02817|AMELX_BOVIN Amelogenin, X isoform OS=Bos taurus OX=9913 GN=AMELX PE=1 SV=2	1	hf1_10472_ebo_32_1_261219.ScanId;v=1;d1=15926.15926.3	controllerType=0 controllerNumber=1 scan=15926	34.8857
01589:3	1	S.MP[+15.995]LPPHPGHPGYINF.S		P[+16]	563.947	3	1689.83	1689.82	0	3.2	17	Non	401	401	4	6.21	1651	>sp|P02817|AMELX_BOVIN Amelogenin, X isoform OS=Bos taurus OX=9913 GN=AMELX PE=1 SV=2	1	hf1_10472_ebo_32_1_261219.ScanId;v=1;d1=2807.2807.3	controllerType=0 controllerNumber=1 scan=2807	12.5206
23002:2	1	S.MPLPP[+15.995]HPGHPGYINF.S		P[+16]	845.418	2	1689.83	1689.82	0	5.1	17	Non	401.67	358.34	10.87	5.83	1651	>sp|P02817|AMELX_BOVIN Amelogenin, X isoform OS=Bos taurus OX=9913 GN=AMELX PE=1 SV=2	1	hf1_10472_ebo_32_1_261219.ScanId;v=1;d1=17706.17706.2	controllerType=0 controllerNumber=1 scan=17706	37.9589
00717:3	1	S.MP[+15.995]LPPHPGHPGYINF.S		P[+16]	563.947	3	1689.83	1689.82	0	4.3	17	Non	424.54	424.54	4	6.48	1651	>sp|P02817|AMELX_BOVIN Amelogenin, X isoform OS=Bos taurus OX=9913 GN=AMELX PE=1 SV=2	1	hf1_10472_ebo_32_1_261219.ScanId;v=1;d1=2156.2156.3	controllerType=0 controllerNumber=1 scan=2156	11.1323
20986:3	1	S.M[+31.990]PLPPHPGHPGYINF.S		M[+32]	569.279	3	1705.82	1705.82	0	5	17	Non	425.34	425.34	9.1	6.76	1651	>sp|P02817|AMELX_BOVIN Amelogenin, X isoform OS=Bos taurus OX=9913 GN=AMELX PE=1 SV=2	1	hf1_10472_ebo_32_1_261219.ScanId;v=1;d1=16323.16323.3	controllerType=0 controllerNumber=1 scan=16323	35.5766
25527:3	1	S.MPLPPHPGHPGYIN[+0.984]F.S		N[+1]	558.943	3	1674.81	1674.81	0	2.7	17	Non	428.32	428.32	428.32	6.21	1651	>sp|P02817|AMELX_BOVIN Amelogenin, X isoform OS=Bos taurus OX=9913 GN=AMELX PE=1 SV=2	1	hf1_10472_ebo_32_1_261219.ScanId;v=1;d1=19375.19375.3	controllerType=0 controllerNumber=1 scan=19375	40.828
47641:2	1	S.M[+15.995]PLPPHPGHPGYINF.S		M[+16]	845.419	2	1689.83	1689.82	0	6.3	17	Non	430.56	430.56	21.22	6.97	1651	>sp|P02817|AMELX_BOVIN Amelogenin, X isoform OS=Bos taurus OX=9913 GN=AMELX PE=1 SV=2	1	hf1_10472_ebo_32_1_261219.ScanId;v=1;d1=34478.34478.2	controllerType=0 controllerNumber=1 scan=34478	69.0861
20702:3	1	S.M[+31.990]PLPPHPGHPGYINF.S		M[+32]	569.279	3	1705.82	1705.82	0	3.8	17	Non	433.78	433.78	10	6.48	1651	>sp|P02817|AMELX_BOVIN Amelogenin, X isoform OS=Bos taurus OX=9913 GN=AMELX PE=1 SV=2	1	hf1_10472_ebo_32_1_261219.ScanId;v=1;d1=16123.16123.3	controllerType=0 controllerNumber=1 scan=16123	35.2322
24453:3	1	S.MP[+15.995]LPPHPGHPGYINF.S		P[+16]	563.948	3	1689.83	1689.82	0	6	17	Non	434.34	434.34	5.8	6.76	1651	>sp|P02817|AMELX_BOVIN Amelogenin, X isoform OS=Bos taurus OX=9913 GN=AMELX PE=1 SV=2	1	hf1_10472_ebo_32_1_261219.ScanId;v=1;d1=18685.18685.3	controllerType=0 controllerNumber=1 scan=18685	39.6464
21270:3	1	S.M[+31.990]PLPPHPGHPGYINF.S		M[+32]	569.279	3	1705.82	1705.82	0	5	17	Non	434.81	434.81	9.77	6.82	1651	>sp|P02817|AMELX_BOVIN Amelogenin, X isoform OS=Bos taurus OX=9913 GN=AMELX PE=1 SV=2	1	hf1_10472_ebo_32_1_261219.ScanId;v=1;d1=16515.16515.3	controllerType=0 controllerNumber=1 scan=16515	35.9151
48014:2	1	S.M[+15.995]PLPPHPGHPGYINF.S		M[+16]	845.421	2	1689.83	1689.82	0	8.3	17	Non	444.53	442.7	30.32	6.55	1651	>sp|P02817|AMELX_BOVIN Amelogenin, X isoform OS=Bos taurus OX=9913 GN=AMELX PE=1 SV=2	1	hf1_10472_ebo_32_1_261219.ScanId;v=1;d1=34787.34787.2	controllerType=0 controllerNumber=1 scan=34787	69.7913
22014:3	1	S.MPLPPHPGHP[+15.995]GYINF.S		P[+16]	563.947	3	1689.83	1689.82	0	3.9	17	Non	450.3	450.3	9.79	6.54	1651	>sp|P02817|AMELX_BOVIN Amelogenin, X isoform OS=Bos taurus OX=9913 GN=AMELX PE=1 SV=2	1	hf1_10472_ebo_32_1_261219.ScanId;v=1;d1=17022.17022.3	controllerType=0 controllerNumber=1 scan=17022	36.7859
23681:3	1	S.MPLPPHPGHPGYIN[+0.984]F.S		N[+1]	558.947	3	1674.83	1674.81	0	9.3	17	Non	450.82	450.82	450.82	6.66	1651	>sp|P02817|AMELX_BOVIN Amelogenin, X isoform OS=Bos taurus OX=9913 GN=AMELX PE=1 SV=2	1	hf1_10472_ebo_32_1_261219.ScanId;v=1;d1=18171.18171.3	controllerType=0 controllerNumber=1 scan=18171	38.7635
22707:2	1	S.MPLPPHPGHP[+15.995]GYINF.S		P[+16]	845.418	2	1689.83	1689.82	0	5.3	17	Non	454.06	413.89	18.86	6.77	1651	>sp|P02817|AMELX_BOVIN Amelogenin, X isoform OS=Bos taurus OX=9913 GN=AMELX PE=1 SV=2	1	hf1_10472_ebo_32_1_261219.ScanId;v=1;d1=17502.17502.2	controllerType=0 controllerNumber=1 scan=17502	37.611
25838:3	1	S.MPLPPHPGHPGYIN[+0.984]F.S		N[+1]	558.945	3	1674.82	1674.81	0	5.7	17	Non	461.49	461.49	461.49	6.82	1651	>sp|P02817|AMELX_BOVIN Amelogenin, X isoform OS=Bos taurus OX=9913 GN=AMELX PE=1 SV=2	1	hf1_10472_ebo_32_1_261219.ScanId;v=1;d1=19576.19576.3	controllerType=0 controllerNumber=1 scan=19576	41.1739
21827:2	1	S.M[+15.995]PLPPHPGHPGYINF.S		M[+16]	845.419	2	1689.83	1689.82	0	6.5	17	Non	463.34	409.59	41.42	6.77	1651	>sp|P02817|AMELX_BOVIN Amelogenin, X isoform OS=Bos taurus OX=9913 GN=AMELX PE=1 SV=2	1	hf1_10472_ebo_32_1_261219.ScanId;v=1;d1=16894.16894.2	controllerType=0 controllerNumber=1 scan=16894	36.5622
17586:2	1	S.M[+15.995]PLPPHPGHPGYINF.S		M[+16]	845.419	2	1689.83	1689.82	0	6.4	17	Non	468.66	382.7	39.99	6.77	1651	>sp|P02817|AMELX_BOVIN Amelogenin, X isoform OS=Bos taurus OX=9913 GN=AMELX PE=1 SV=2	1	hf1_10472_ebo_32_1_261219.ScanId;v=1;d1=13917.13917.2	controllerType=0 controllerNumber=1 scan=13917	31.4027
25222:3	1	S.MPLPPHPGHPGYIN[+0.984]F.S		N[+1]	558.946	3	1674.82	1674.81	0	7.5	17	Non	472.26	472.26	472.26	6.6	1651	>sp|P02817|AMELX_BOVIN Amelogenin, X isoform OS=Bos taurus OX=9913 GN=AMELX PE=1 SV=2	1	hf1_10472_ebo_32_1_261219.ScanId;v=1;d1=19171.19171.3	controllerType=0 controllerNumber=1 scan=19171	40.4805
22307:3	1	S.MPLPPHPGHP[+15.995]GYINF.S		P[+16]	563.947	3	1689.83	1689.82	0	4.4	17	Non	473.35	473.35	0.7	6.54	1651	>sp|P02817|AMELX_BOVIN Amelogenin, X isoform OS=Bos taurus OX=9913 GN=AMELX PE=1 SV=2	1	hf1_10472_ebo_32_1_261219.ScanId;v=1;d1=17225.17225.3	controllerType=0 controllerNumber=1 scan=17225	37.1346
20346:2	1	S.M[+31.990]PLPPHPGHPGYINF.S		M[+32]	853.417	2	1705.83	1705.82	0	6.2	17	Non	496.9	496.9	0	6.75	1651	>sp|P02817|AMELX_BOVIN Amelogenin, X isoform OS=Bos taurus OX=9913 GN=AMELX PE=1 SV=2	1	hf1_10472_ebo_32_1_261219.ScanId;v=1;d1=15871.15871.2	controllerType=0 controllerNumber=1 scan=15871	34.7957
20063:2	1	S.MP[+31.990]LPPHPGHPGYINF.S		P[+32]	853.417	2	1705.83	1705.82	0	6.6	17	Non	497.47	497.47	0.36	6.8	1651	>sp|P02817|AMELX_BOVIN Amelogenin, X isoform OS=Bos taurus OX=9913 GN=AMELX PE=1 SV=2	1	hf1_10472_ebo_32_1_261219.ScanId;v=1;d1=15672.15672.2	controllerType=0 controllerNumber=1 scan=15672	34.4565
24907:3	1	S.MPLPPHPGHPGYIN[+0.984]F.S		N[+1]	558.946	3	1674.82	1674.81	0	7.4	17	Non	512.2	512.2	512.2	7.1	1651	>sp|P02817|AMELX_BOVIN Amelogenin, X isoform OS=Bos taurus OX=9913 GN=AMELX PE=1 SV=2	1	hf1_10472_ebo_32_1_261219.ScanId;v=1;d1=18972.18972.3	controllerType=0 controllerNumber=1 scan=18972	40.1425
24283:3	1	S.MPLPPHPGHPGYIN[+0.984]F.S		N[+1]	558.947	3	1674.83	1674.81	0	9.8	17	Non	517.7	517.7	517.7	6.58	1651	>sp|P02817|AMELX_BOVIN Amelogenin, X isoform OS=Bos taurus OX=9913 GN=AMELX PE=1 SV=2	1	hf1_10472_ebo_32_1_261219.ScanId;v=1;d1=18574.18574.3	controllerType=0 controllerNumber=1 scan=18574	39.4581
21466:2	1	S.M[+31.990]PLPPHPGHPGYINF.S		M[+32]	853.416	2	1705.82	1705.82	0	4.9	17	Non	517.73	517.73	6.47	7.08	1651	>sp|P02817|AMELX_BOVIN Amelogenin, X isoform OS=Bos taurus OX=9913 GN=AMELX PE=1 SV=2	1	hf1_10472_ebo_32_1_261219.ScanId;v=1;d1=16648.16648.2	controllerType=0 controllerNumber=1 scan=16648	36.1415
18989:2	1	S.M[+15.995]PLPPHPGHPGYINF.S		M[+16]	845.418	2	1689.83	1689.82	0	5.2	17	Non	524.05	421.22	51.92	7.17	1651	>sp|P02817|AMELX_BOVIN Amelogenin, X isoform OS=Bos taurus OX=9913 GN=AMELX PE=1 SV=2	1	hf1_10472_ebo_32_1_261219.ScanId;v=1;d1=14907.14907.2	controllerType=0 controllerNumber=1 scan=14907	33.1186
21168:2	1	S.MP[+31.990]LPPHPGHPGYINF.S		P[+32]	853.416	2	1705.83	1705.82	0	5.7	17	Non	525.27	525.27	1.8	7.17	1651	>sp|P02817|AMELX_BOVIN Amelogenin, X isoform OS=Bos taurus OX=9913 GN=AMELX PE=1 SV=2	1	hf1_10472_ebo_32_1_261219.ScanId;v=1;d1=16444.16444.2	controllerType=0 controllerNumber=1 scan=16444	35.7877
20941:2	1	S.M[+15.995]PLPPHPGHPGYINF.S		M[+16]	845.419	2	1689.83	1689.82	0	5.6	17	Non	527.69	487.18	35	7.23	1651	>sp|P02817|AMELX_BOVIN Amelogenin, X isoform OS=Bos taurus OX=9913 GN=AMELX PE=1 SV=2	1	hf1_10472_ebo_32_1_261219.ScanId;v=1;d1=16291.16291.2	controllerType=0 controllerNumber=1 scan=16291	35.5199
19270:2	1	S.M[+15.995]PLPPHPGHPGYINF.S		M[+16]	845.418	2	1689.83	1689.82	0	4.8	17	Non	539.11	465.06	60.01	7.17	1651	>sp|P02817|AMELX_BOVIN Amelogenin, X isoform OS=Bos taurus OX=9913 GN=AMELX PE=1 SV=2	1	hf1_10472_ebo_32_1_261219.ScanId;v=1;d1=15102.15102.2	controllerType=0 controllerNumber=1 scan=15102	33.4598
18714:2	1	S.M[+15.995]PLPPHPGHPGYINF.S		M[+16]	845.419	2	1689.83	1689.82	0	5.7	17	Non	543.42	444.85	57.97	7.23	1651	>sp|P02817|AMELX_BOVIN Amelogenin, X isoform OS=Bos taurus OX=9913 GN=AMELX PE=1 SV=2	1	hf1_10472_ebo_32_1_261219.ScanId;v=1;d1=14714.14714.2	controllerType=0 controllerNumber=1 scan=14714	32.7785
24589:3	1	S.MPLPPHPGHPGYIN[+0.984]F.S		N[+1]	558.946	3	1674.82	1674.81	0	8.6	17	Non	545.67	545.67	545.67	7.25	1651	>sp|P02817|AMELX_BOVIN Amelogenin, X isoform OS=Bos taurus OX=9913 GN=AMELX PE=1 SV=2	1	hf1_10472_ebo_32_1_261219.ScanId;v=1;d1=18770.18770.3	controllerType=0 controllerNumber=1 scan=18770	39.7973
25050:2	1	S.MPLPPHPGHPGYIN[+0.984]F.S		N[+1]	837.913	2	1674.82	1674.81	0	5.1	17	Non	545.84	506.56	506.56	7.17	1651	>sp|P02817|AMELX_BOVIN Amelogenin, X isoform OS=Bos taurus OX=9913 GN=AMELX PE=1 SV=2	1	hf1_10472_ebo_32_1_261219.ScanId;v=1;d1=19060.19060.2	controllerType=0 controllerNumber=1 scan=19060	40.2933
20644:2	1	S.M[+15.995]PLPPHPGHPGYINF.S		M[+16]	845.418	2	1689.83	1689.82	0	5	17	Non	546.02	502.18	63.35	7.23	1651	>sp|P02817|AMELX_BOVIN Amelogenin, X isoform OS=Bos taurus OX=9913 GN=AMELX PE=1 SV=2	1	hf1_10472_ebo_32_1_261219.ScanId;v=1;d1=16084.16084.2	controllerType=0 controllerNumber=1 scan=16084	35.1673
20374:2	1	S.M[+15.995]PLPPHPGHPGYINF.S		M[+16]	845.418	2	1689.83	1689.82	0	5.3	17	Non	554.03	508.96	54.1	7.17	1651	>sp|P02817|AMELX_BOVIN Amelogenin, X isoform OS=Bos taurus OX=9913 GN=AMELX PE=1 SV=2	1	hf1_10472_ebo_32_1_261219.ScanId;v=1;d1=15892.15892.2	controllerType=0 controllerNumber=1 scan=15892	34.832
20620:2	1	S.MP[+31.990]LPPHPGHPGYINF.S		P[+32]	853.414	2	1705.82	1705.82	0	3.1	17	Non	556.34	556.34	0	6.9	1651	>sp|P02817|AMELX_BOVIN Amelogenin, X isoform OS=Bos taurus OX=9913 GN=AMELX PE=1 SV=2	1	hf1_10472_ebo_32_1_261219.ScanId;v=1;d1=16068.16068.2	controllerType=0 controllerNumber=1 scan=16068	35.1379
20993:2	1	S.MP[+31.990]LPPHPGHPGYINF.S		P[+32]	853.417	2	1705.83	1705.82	0	6.4	17	Non	556.67	556.67	1.8	7.23	1651	>sp|P02817|AMELX_BOVIN Amelogenin, X isoform OS=Bos taurus OX=9913 GN=AMELX PE=1 SV=2	1	hf1_10472_ebo_32_1_261219.ScanId;v=1;d1=16328.16328.2	controllerType=0 controllerNumber=1 scan=16328	35.5829
22118:2	1	S.MPLPPHPGHP[+15.995]GYINF.S		P[+16]	845.42	2	1689.83	1689.82	0	6.7	17	Non	570.36	467.98	7.81	7.68	1651	>sp|P02817|AMELX_BOVIN Amelogenin, X isoform OS=Bos taurus OX=9913 GN=AMELX PE=1 SV=2	1	hf1_10472_ebo_32_1_261219.ScanId;v=1;d1=17094.17094.2	controllerType=0 controllerNumber=1 scan=17094	36.9102
22410:2	1	S.MPLPPHPGHP[+15.995]GYINF.S		P[+16]	845.418	2	1689.83	1689.82	0	4.7	17	Non	578.16	486.69	2.51	7.68	1651	>sp|P02817|AMELX_BOVIN Amelogenin, X isoform OS=Bos taurus OX=9913 GN=AMELX PE=1 SV=2	1	hf1_10472_ebo_32_1_261219.ScanId;v=1;d1=17298.17298.2	controllerType=0 controllerNumber=1 scan=17298	37.2616
19806:2	1	S.M[+15.995]PLPPHPGHPGYINF.S		M[+16]	845.419	2	1689.83	1689.82	0	5.8	17	Non	595.93	521.5	62.75	8.01	1651	>sp|P02817|AMELX_BOVIN Amelogenin, X isoform OS=Bos taurus OX=9913 GN=AMELX PE=1 SV=2	1	hf1_10472_ebo_32_1_261219.ScanId;v=1;d1=15493.15493.2	controllerType=0 controllerNumber=1 scan=15493	34.1443
20081:2	1	S.M[+15.995]PLPPHPGHPGYINF.S		M[+16]	845.419	2	1689.83	1689.82	0	5.8	17	Non	625.19	580.91	59.29	9.01	1651	>sp|P02817|AMELX_BOVIN Amelogenin, X isoform OS=Bos taurus OX=9913 GN=AMELX PE=1 SV=2	1	hf1_10472_ebo_32_1_261219.ScanId;v=1;d1=15686.15686.2	controllerType=0 controllerNumber=1 scan=15686	34.4826
19534:2	1	S.M[+15.995]PLPPHPGHPGYINF.S		M[+16]	845.418	2	1689.83	1689.82	0	5	17	Non	638.58	538.79	73.28	9.46	1651	>sp|P02817|AMELX_BOVIN Amelogenin, X isoform OS=Bos taurus OX=9913 GN=AMELX PE=1 SV=2	1	hf1_10472_ebo_32_1_261219.ScanId;v=1;d1=15294.15294.2	controllerType=0 controllerNumber=1 scan=15294	33.7987
23510:2	1	S.MPLPPHPGHPGYIN[+0.984]F.S		N[+1]	837.914	2	1674.82	1674.81	0	6.3	17	Non	648.85	593.03	593.03	9.01	1651	>sp|P02817|AMELX_BOVIN Amelogenin, X isoform OS=Bos taurus OX=9913 GN=AMELX PE=1 SV=2	1	hf1_10472_ebo_32_1_261219.ScanId;v=1;d1=18054.18054.2	controllerType=0 controllerNumber=1 scan=18054	38.563
24737:2	1	S.MPLPPHPGHPGYIN[+0.984]F.S		N[+1]	837.915	2	1674.82	1674.81	0	7.5	17	Non	669.95	642.71	642.71	9.79	1651	>sp|P02817|AMELX_BOVIN Amelogenin, X isoform OS=Bos taurus OX=9913 GN=AMELX PE=1 SV=2	1	hf1_10472_ebo_32_1_261219.ScanId;v=1;d1=18862.18862.2	controllerType=0 controllerNumber=1 scan=18862	39.9524
23803:2	1	S.MPLPPHPGHPGYIN[+0.984]F.S		N[+1]	837.913	2	1674.82	1674.81	0	5.4	17	Non	675.27	628.59	628.59	10.46	1651	>sp|P02817|AMELX_BOVIN Amelogenin, X isoform OS=Bos taurus OX=9913 GN=AMELX PE=1 SV=2	1	hf1_10472_ebo_32_1_261219.ScanId;v=1;d1=18258.18258.2	controllerType=0 controllerNumber=1 scan=18258	38.9145
24419:2	1	S.MPLPPHPGHPGYIN[+0.984]F.S		N[+1]	837.915	2	1674.82	1674.81	0	7.8	17	Non	678.2	652	652	9.79	1651	>sp|P02817|AMELX_BOVIN Amelogenin, X isoform OS=Bos taurus OX=9913 GN=AMELX PE=1 SV=2	1	hf1_10472_ebo_32_1_261219.ScanId;v=1;d1=18662.18662.2	controllerType=0 controllerNumber=1 scan=18662	39.6071
24107:2	1	S.MPLPPHPGHPGYIN[+0.984]F.S		N[+1]	837.914	2	1674.82	1674.81	0	6.5	17	Non	688.28	651.6	651.6	10.01	1651	>sp|P02817|AMELX_BOVIN Amelogenin, X isoform OS=Bos taurus OX=9913 GN=AMELX PE=1 SV=2	1	hf1_10472_ebo_32_1_261219.ScanId;v=1;d1=18462.18462.2	controllerType=0 controllerNumber=1 scan=18462	39.2671
19299:3	1	S.M[+31.990]PLPPHPGHPGYIN[+0.984]F.S		M[+32], N[+1]	569.607	3	1706.81	1706.8	0	4.9	17	Non	132.4	132.4	0	2.31	1651	>sp|P02817|AMELX_BOVIN Amelogenin, X isoform OS=Bos taurus OX=9913 GN=AMELX PE=1 SV=2	1	hf1_10472_ebo_32_1_261219.ScanId;v=1;d1=15122.15122.3	controllerType=0 controllerNumber=1 scan=15122	33.4949
20379:3	1	S.M[+31.990]PLPPH[+15.995]PGHPGYINF.S		H[+16], M[+32]	574.611	3	1721.82	1721.81	0	4.6	17	Non	134.91	134.91	0	2.29	1651	>sp|P02817|AMELX_BOVIN Amelogenin, X isoform OS=Bos taurus OX=9913 GN=AMELX PE=1 SV=2	1	hf1_10472_ebo_32_1_261219.ScanId;v=1;d1=15895.15895.3	controllerType=0 controllerNumber=1 scan=15895	34.8363
47155:2	1	S.M[+15.995]PLPPHPGHPGYIN[+0.984]F.S		M[+16], N[+1]	845.908	2	1690.81	1690.8	0	1.8	17	Non	165.5	165.5	12.65	2.79	1651	>sp|P02817|AMELX_BOVIN Amelogenin, X isoform OS=Bos taurus OX=9913 GN=AMELX PE=1 SV=2	1	hf1_10472_ebo_32_1_261219.ScanId;v=1;d1=34075.34075.2	controllerType=0 controllerNumber=1 scan=34075	68.2031
19704:3	1	S.MP[+31.990]LPPH[+15.995]PGHPGYINF.S		H[+16], P[+32]	574.611	3	1721.82	1721.81	0	4.5	17	Non	187.6	187.6	0	2.48	1651	>sp|P02817|AMELX_BOVIN Amelogenin, X isoform OS=Bos taurus OX=9913 GN=AMELX PE=1 SV=2	1	hf1_10472_ebo_32_1_261219.ScanId;v=1;d1=15414.15414.3	controllerType=0 controllerNumber=1 scan=15414	34.0043
19347:3	1	S.MP[+15.995]LPP[+31.990]HPGHPGYINF.S		P[+16][+32]	574.611	3	1721.82	1721.81	0	3.8	17	Non	192.13	192.13	1.32	2.48	1651	>sp|P02817|AMELX_BOVIN Amelogenin, X isoform OS=Bos taurus OX=9913 GN=AMELX PE=1 SV=2	1	hf1_10472_ebo_32_1_261219.ScanId;v=1;d1=15159.15159.3	controllerType=0 controllerNumber=1 scan=15159	33.5618
19785:2	1	S.M[+31.990]PLPPHPGHPGYIN[+0.984]F.S		M[+32], N[+1]	853.91	2	1706.81	1706.8	0	7.5	17	Non	201.36	163.72	4.84	2.3	1651	>sp|P02817|AMELX_BOVIN Amelogenin, X isoform OS=Bos taurus OX=9913 GN=AMELX PE=1 SV=2	1	hf1_10472_ebo_32_1_261219.ScanId;v=1;d1=15477.15477.2	controllerType=0 controllerNumber=1 scan=15477	34.1148
17880:3	1	S.MP[+15.995]LPPHPGHP[+15.995]GYINF.S		P[+16]*2	569.278	3	1705.82	1705.82	0	1.4	17	Non	201.42	201.42	4	2.9	1651	>sp|P02817|AMELX_BOVIN Amelogenin, X isoform OS=Bos taurus OX=9913 GN=AMELX PE=1 SV=2	1	hf1_10472_ebo_32_1_261219.ScanId;v=1;d1=14121.14121.3	controllerType=0 controllerNumber=1 scan=14121	31.7595
16237:3	1	S.M[+15.995]PLPP[+15.995]HPGHPGYINF.S		M[+16], P[+16]	569.279	3	1705.82	1705.82	0	4.7	17	Non	215.49	153.51	9.29	2.53	1651	>sp|P02817|AMELX_BOVIN Amelogenin, X isoform OS=Bos taurus OX=9913 GN=AMELX PE=1 SV=2	1	hf1_10472_ebo_32_1_261219.ScanId;v=1;d1=12990.12990.2	controllerType=0 controllerNumber=1 scan=12990	29.8099
20056:3	1	S.MP[+31.990]LPPHPGH[+15.995]PGYINF.S		H[+16], P[+32]	574.611	3	1721.82	1721.81	0	4.1	17	Non	221.55	221.55	1.8	2.67	1651	>sp|P02817|AMELX_BOVIN Amelogenin, X isoform OS=Bos taurus OX=9913 GN=AMELX PE=1 SV=2	1	hf1_10472_ebo_32_1_261219.ScanId;v=1;d1=15668.15668.3	controllerType=0 controllerNumber=1 scan=15668	34.4478
00034:3	1	S.MP[+15.995]LPP[+15.995]HPGHPGYINF.S		P[+16]*2	569.277	3	1705.82	1705.82	0	0.7	17	Non	226.66	226.66	4.82	2.9	1651	>sp|P02817|AMELX_BOVIN Amelogenin, X isoform OS=Bos taurus OX=9913 GN=AMELX PE=1 SV=2	1	hf1_10472_ebo_32_1_261219.ScanId;v=1;d1=115.115.3	controllerType=0 controllerNumber=1 scan=115	0.5638
20041:3	1	S.MP[+15.995]LP[+31.990]PHPGHPGYINF.S		P[+16][+32]	574.611	3	1721.82	1721.81	0	4.6	17	Non	249.08	249.08	2.19	4.43	1651	>sp|P02817|AMELX_BOVIN Amelogenin, X isoform OS=Bos taurus OX=9913 GN=AMELX PE=1 SV=2	1	hf1_10472_ebo_32_1_261219.ScanId;v=1;d1=15658.15658.3	controllerType=0 controllerNumber=1 scan=15658	34.431
23146:3	1	S.MP[+31.990]LPPHPGHPGYIN[+0.984]F.S		N[+1], P[+32]	569.607	3	1706.81	1706.8	0	3.8	17	Non	255.35	218.26	1.8	4.48	1651	>sp|P02817|AMELX_BOVIN Amelogenin, X isoform OS=Bos taurus OX=9913 GN=AMELX PE=1 SV=2	1	hf1_10472_ebo_32_1_261219.ScanId;v=1;d1=17806.17806.3	controllerType=0 controllerNumber=1 scan=17806	38.1333
19298:3	1	S.MP[+15.995]LPPHP[+15.995]GHPGYINF.S		P[+16]*2	569.279	3	1705.82	1705.82	0	4.9	17	Non	274.61	274.61	4	5.09	1651	>sp|P02817|AMELX_BOVIN Amelogenin, X isoform OS=Bos taurus OX=9913 GN=AMELX PE=1 SV=2	1	hf1_10472_ebo_32_1_261219.ScanId;v=1;d1=15122.15122.3	controllerType=0 controllerNumber=1 scan=15122	33.4949
24412:2	1	S.M[+15.995]PLPPH[+15.995]PGHPGYINF.S		H[+16], M[+16]	853.417	2	1705.83	1705.82	0	6.6	17	Non	282.29	282.29	0	5.19	1651	>sp|P02817|AMELX_BOVIN Amelogenin, X isoform OS=Bos taurus OX=9913 GN=AMELX PE=1 SV=2	1	hf1_10472_ebo_32_1_261219.ScanId;v=1;d1=18657.18657.2	controllerType=0 controllerNumber=1 scan=18657	39.5974
18168:3	1	S.MP[+15.995]LPPHPGHP[+15.995]GYINF.S		P[+16]*2	569.278	3	1705.82	1705.82	0	2.2	17	Non	283.14	283.14	4	4.63	1651	>sp|P02817|AMELX_BOVIN Amelogenin, X isoform OS=Bos taurus OX=9913 GN=AMELX PE=1 SV=2	1	hf1_10472_ebo_32_1_261219.ScanId;v=1;d1=14322.14322.3	controllerType=0 controllerNumber=1 scan=14322	32.1001
24127:3	1	S.MP[+15.995]LPPHPGHPGYIN[+0.984]F.S		N[+1], P[+16]	564.274	3	1690.81	1690.8	0	2.1	17	Non	301.98	301.98	5.8	4.24	1651	>sp|P02817|AMELX_BOVIN Amelogenin, X isoform OS=Bos taurus OX=9913 GN=AMELX PE=1 SV=2	1	hf1_10472_ebo_32_1_261219.ScanId;v=1;d1=18474.18474.3	controllerType=0 controllerNumber=1 scan=18474	39.2863
19069:3	1	S.MP[+31.990]LPP[+15.995]HPGHPGYINF.S		P[+16][+32]	574.609	3	1721.81	1721.81	0	1.4	17	Non	302.82	302.82	1.8	4.24	1651	>sp|P02817|AMELX_BOVIN Amelogenin, X isoform OS=Bos taurus OX=9913 GN=AMELX PE=1 SV=2	1	hf1_10472_ebo_32_1_261219.ScanId;v=1;d1=14960.14960.3	controllerType=0 controllerNumber=1 scan=14960	33.2086
24854:2	1	S.M[+15.995]PLP[+15.995]PHPGHPGYINF.S		M[+16], P[+16]	853.418	2	1705.83	1705.82	0	7.1	17	Non	305.63	305.63	5	4.97	1651	>sp|P02817|AMELX_BOVIN Amelogenin, X isoform OS=Bos taurus OX=9913 GN=AMELX PE=1 SV=2	1	hf1_10472_ebo_32_1_261219.ScanId;v=1;d1=18935.18935.2	controllerType=0 controllerNumber=1 scan=18935	40.078
19016:3	1	S.MP[+15.995]LP[+15.995]PHPGHPGYINF.S		P[+16]*2	569.279	3	1705.82	1705.82	0	4.8	17	Non	313.69	313.69	2.23	5.36	1651	>sp|P02817|AMELX_BOVIN Amelogenin, X isoform OS=Bos taurus OX=9913 GN=AMELX PE=1 SV=2	1	hf1_10472_ebo_32_1_261219.ScanId;v=1;d1=14925.14925.3	controllerType=0 controllerNumber=1 scan=14925	33.148
22778:3	1	S.M[+31.990]PLPPHPGHPGYIN[+0.984]F.S		M[+32], N[+1]	569.607	3	1706.81	1706.8	0	3.7	17	Non	341.86	300.73	6.62	5.25	1651	>sp|P02817|AMELX_BOVIN Amelogenin, X isoform OS=Bos taurus OX=9913 GN=AMELX PE=1 SV=2	1	hf1_10472_ebo_32_1_261219.ScanId;v=1;d1=17549.17549.3	controllerType=0 controllerNumber=1 scan=17549	37.6908
18456:3	1	S.MP[+15.995]LPPHPGHP[+15.995]GYINF.S		P[+16]*2	569.279	3	1705.82	1705.82	0	3.3	17	Non	345.12	345.12	4	5.37	1651	>sp|P02817|AMELX_BOVIN Amelogenin, X isoform OS=Bos taurus OX=9913 GN=AMELX PE=1 SV=2	1	hf1_10472_ebo_32_1_261219.ScanId;v=1;d1=14529.14529.3	controllerType=0 controllerNumber=1 scan=14529	32.4583
18728:3	1	S.MP[+15.995]LPPHPGHP[+15.995]GYINF.S		P[+16]*2	569.278	3	1705.82	1705.82	0	2.6	17	Non	352.47	352.47	4	5.32	1651	>sp|P02817|AMELX_BOVIN Amelogenin, X isoform OS=Bos taurus OX=9913 GN=AMELX PE=1 SV=2	1	hf1_10472_ebo_32_1_261219.ScanId;v=1;d1=14725.14725.3	controllerType=0 controllerNumber=1 scan=14725	32.797
23229:3	1	S.MPLPPHP[+15.995]GHPGYIN[+0.984]F.S		N[+1], P[+16]	564.276	3	1690.81	1690.8	0	4.8	17	Non	355.75	355.75	6.21	5.6	1651	>sp|P02817|AMELX_BOVIN Amelogenin, X isoform OS=Bos taurus OX=9913 GN=AMELX PE=1 SV=2	1	hf1_10472_ebo_32_1_261219.ScanId;v=1;d1=17866.17866.3	controllerType=0 controllerNumber=1 scan=17866	38.2381
21730:3	1	S.MP[+15.995]LPPHPGHPGYIN[+0.984]F.S		N[+1], P[+16]	564.276	3	1690.81	1690.8	0	5.5	17	Non	375.07	375.07	5.8	6.47	1651	>sp|P02817|AMELX_BOVIN Amelogenin, X isoform OS=Bos taurus OX=9913 GN=AMELX PE=1 SV=2	1	hf1_10472_ebo_32_1_261219.ScanId;v=1;d1=16828.16828.3	controllerType=0 controllerNumber=1 scan=16828	36.4504
20566:3	1	S.MP[+15.995]LPPHPGHPGYIN[+0.984]F.S		N[+1], P[+16]	564.279	3	1690.82	1690.8	0	9.7	17	Non	382.27	382.27	4	6	1651	>sp|P02817|AMELX_BOVIN Amelogenin, X isoform OS=Bos taurus OX=9913 GN=AMELX PE=1 SV=2	1	hf1_10472_ebo_32_1_261219.ScanId;v=1;d1=16027.16027.3	controllerType=0 controllerNumber=1 scan=16027	35.0607
23821:3	1	S.MP[+15.995]LPPHPGHPGYIN[+0.984]F.S		N[+1], P[+16]	564.273	3	1690.8	1690.8	0	-0.1	17	Non	382.35	382.35	1.4	5.64	1651	>sp|P02817|AMELX_BOVIN Amelogenin, X isoform OS=Bos taurus OX=9913 GN=AMELX PE=1 SV=2	1	hf1_10472_ebo_32_1_261219.ScanId;v=1;d1=18270.18270.3	controllerType=0 controllerNumber=1 scan=18270	38.9345
23526:3	1	S.MPLPPH[+15.995]PGHPGYIN[+0.984]F.S		H[+16], N[+1]	564.274	3	1690.81	1690.8	0	1.1	17	Non	383.39	383.39	1.18	5.79	1651	>sp|P02817|AMELX_BOVIN Amelogenin, X isoform OS=Bos taurus OX=9913 GN=AMELX PE=1 SV=2	1	hf1_10472_ebo_32_1_261219.ScanId;v=1;d1=18065.18065.3	controllerType=0 controllerNumber=1 scan=18065	38.5811
20847:3	1	S.MP[+15.995]LPPHPGHPGYIN[+0.984]F.S		N[+1], P[+16]	564.278	3	1690.82	1690.8	0	9.1	17	Non	387.35	387.35	4	6.52	1651	>sp|P02817|AMELX_BOVIN Amelogenin, X isoform OS=Bos taurus OX=9913 GN=AMELX PE=1 SV=2	1	hf1_10472_ebo_32_1_261219.ScanId;v=1;d1=16225.16225.3	controllerType=0 controllerNumber=1 scan=16225	35.4065
22617:2	1	S.M[+15.995]PLP[+15.995]PHPGHPGYINF.S		M[+16], P[+16]	853.413	2	1705.82	1705.82	0	2.3	17	Non	408.7	408.7	12.86	6.02	1651	>sp|P02817|AMELX_BOVIN Amelogenin, X isoform OS=Bos taurus OX=9913 GN=AMELX PE=1 SV=2	1	hf1_10472_ebo_32_1_261219.ScanId;v=1;d1=17440.17440.2	controllerType=0 controllerNumber=1 scan=17440	37.5025
22166:3	1	S.M[+31.990]PLPPHPGHPGYIN[+0.984]F.S		M[+32], N[+1]	569.607	3	1706.81	1706.8	0	3.4	17	Non	420.62	354.55	6.64	5.66	1651	>sp|P02817|AMELX_BOVIN Amelogenin, X isoform OS=Bos taurus OX=9913 GN=AMELX PE=1 SV=2	1	hf1_10472_ebo_32_1_261219.ScanId;v=1;d1=17127.17127.3	controllerType=0 controllerNumber=1 scan=17127	36.9657
21575:3	1	S.M[+31.990]PLPPHPGHPGYIN[+0.984]F.S		M[+32], N[+1]	569.607	3	1706.81	1706.8	0	4	17	Non	424.84	380.4	9.77	6.54	1651	>sp|P02817|AMELX_BOVIN Amelogenin, X isoform OS=Bos taurus OX=9913 GN=AMELX PE=1 SV=2	1	hf1_10472_ebo_32_1_261219.ScanId;v=1;d1=16721.16721.3	controllerType=0 controllerNumber=1 scan=16721	36.2651
22463:3	1	S.M[+31.990]PLPPHPGHPGYIN[+0.984]F.S		M[+32], N[+1]	569.607	3	1706.81	1706.8	0	4.1	17	Non	426.86	360.21	6.67	5.61	1651	>sp|P02817|AMELX_BOVIN Amelogenin, X isoform OS=Bos taurus OX=9913 GN=AMELX PE=1 SV=2	1	hf1_10472_ebo_32_1_261219.ScanId;v=1;d1=17331.17331.3	controllerType=0 controllerNumber=1 scan=17331	37.3177
21140:3	1	S.MP[+15.995]LPPHPGHPGYIN[+0.984]F.S		N[+1], P[+16]	564.277	3	1690.82	1690.8	0	7.7	17	Non	430.24	430.24	5.8	6.54	1651	>sp|P02817|AMELX_BOVIN Amelogenin, X isoform OS=Bos taurus OX=9913 GN=AMELX PE=1 SV=2	1	hf1_10472_ebo_32_1_261219.ScanId;v=1;d1=16427.16427.3	controllerType=0 controllerNumber=1 scan=16427	35.7582
21874:3	1	S.M[+31.990]PLPPHPGHPGYIN[+0.984]F.S		M[+32], N[+1]	569.606	3	1706.81	1706.8	0	3.2	17	Non	437.99	390.05	9	6.48	1651	>sp|P02817|AMELX_BOVIN Amelogenin, X isoform OS=Bos taurus OX=9913 GN=AMELX PE=1 SV=2	1	hf1_10472_ebo_32_1_261219.ScanId;v=1;d1=16924.16924.3	controllerType=0 controllerNumber=1 scan=16924	36.6125
22661:3	1	S.MPLPPHPGHP[+15.995]GYIN[+0.984]F.S		N[+1], P[+16]	564.275	3	1690.81	1690.8	0	2.9	17	Non	439.36	439.36	7.71	6.48	1651	>sp|P02817|AMELX_BOVIN Amelogenin, X isoform OS=Bos taurus OX=9913 GN=AMELX PE=1 SV=2	1	hf1_10472_ebo_32_1_261219.ScanId;v=1;d1=17473.17473.3	controllerType=0 controllerNumber=1 scan=17473	37.5605
21430:3	1	S.MP[+15.995]LPPHPGHPGYIN[+0.984]F.S		N[+1], P[+16]	564.277	3	1690.82	1690.8	0	6.4	17	Non	440.56	440.56	5.8	6.82	1651	>sp|P02817|AMELX_BOVIN Amelogenin, X isoform OS=Bos taurus OX=9913 GN=AMELX PE=1 SV=2	1	hf1_10472_ebo_32_1_261219.ScanId;v=1;d1=16625.16625.3	controllerType=0 controllerNumber=1 scan=16625	36.1024
23284:2	1	S.MPLPPHPGHP[+15.995]GYIN[+0.984]F.S		N[+1], P[+16]	845.911	2	1690.81	1690.8	0	5.6	17	Non	454.11	384.25	6.63	6.81	1651	>sp|P02817|AMELX_BOVIN Amelogenin, X isoform OS=Bos taurus OX=9913 GN=AMELX PE=1 SV=2	1	hf1_10472_ebo_32_1_261219.ScanId;v=1;d1=17906.17906.2	controllerType=0 controllerNumber=1 scan=17906	38.3077
18117:2	1	S.M[+15.995]PLPPHPGHPGY[+15.995]INF.S		M[+16], Y[+16]	853.416	2	1705.82	1705.82	0	5.3	17	Non	482.92	482.92	0	6.75	1651	>sp|P02817|AMELX_BOVIN Amelogenin, X isoform OS=Bos taurus OX=9913 GN=AMELX PE=1 SV=2	1	hf1_10472_ebo_32_1_261219.ScanId;v=1;d1=14288.14288.2	controllerType=0 controllerNumber=1 scan=14288	32.0461
21828:2	1	S.M[+15.995]PLPPHPGHPGYIN[+0.984]F.S		M[+16], N[+1]	845.913	2	1690.82	1690.8	0	7.9	17	Non	493.16	464.66	47.41	6.54	1651	>sp|P02817|AMELX_BOVIN Amelogenin, X isoform OS=Bos taurus OX=9913 GN=AMELX PE=1 SV=2	1	hf1_10472_ebo_32_1_261219.ScanId;v=1;d1=16894.16894.2	controllerType=0 controllerNumber=1 scan=16894	36.5622
21761:2	1	S.MP[+31.990]LPPHPGHPGYIN[+0.984]F.S		N[+1], P[+32]	853.908	2	1706.81	1706.8	0	5	17	Non	494.27	424.78	1.8	6.75	1651	>sp|P02817|AMELX_BOVIN Amelogenin, X isoform OS=Bos taurus OX=9913 GN=AMELX PE=1 SV=2	1	hf1_10472_ebo_32_1_261219.ScanId;v=1;d1=16848.16848.2	controllerType=0 controllerNumber=1 scan=16848	36.4841
23003:2	1	S.MPLPPHPGHP[+15.995]GYIN[+0.984]F.S		N[+1], P[+16]	845.91	2	1690.81	1690.8	0	4.5	17	Non	533.56	498.71	13.31	6.63	1651	>sp|P02817|AMELX_BOVIN Amelogenin, X isoform OS=Bos taurus OX=9913 GN=AMELX PE=1 SV=2	1	hf1_10472_ebo_32_1_261219.ScanId;v=1;d1=17706.17706.2	controllerType=0 controllerNumber=1 scan=17706	37.9589
17830:2	1	S.M[+15.995]PLPPHPGHP[+15.995]GYINF.S		M[+16], P[+16]	853.412	2	1705.82	1705.82	0	0.5	17	Non	544.7	544.7	13.33	6.17	1651	>sp|P02817|AMELX_BOVIN Amelogenin, X isoform OS=Bos taurus OX=9913 GN=AMELX PE=1 SV=2	1	hf1_10472_ebo_32_1_261219.ScanId;v=1;d1=14086.14086.2	controllerType=0 controllerNumber=1 scan=14086	31.6988
18958:2	1	S.M[+15.995]PLPPHPGHPGY[+15.995]INF.S		M[+16], Y[+16]	853.416	2	1705.83	1705.82	0	5.9	17	Non	550.26	550.26	0	7.17	1651	>sp|P02817|AMELX_BOVIN Amelogenin, X isoform OS=Bos taurus OX=9913 GN=AMELX PE=1 SV=2	1	hf1_10472_ebo_32_1_261219.ScanId;v=1;d1=14886.14886.2	controllerType=0 controllerNumber=1 scan=14886	33.077
20645:2	1	S.M[+15.995]PLPPHPGHPGYIN[+0.984]F.S		M[+16], N[+1]	845.91	2	1690.81	1690.8	0	5.4	17	Non	570.03	542.05	64.66	7.95	1651	>sp|P02817|AMELX_BOVIN Amelogenin, X isoform OS=Bos taurus OX=9913 GN=AMELX PE=1 SV=2	1	hf1_10472_ebo_32_1_261219.ScanId;v=1;d1=16084.16084.2	controllerType=0 controllerNumber=1 scan=16084	35.1673
20375:2	1	S.M[+15.995]PLPPHPGHPGYIN[+0.984]F.S		M[+16], N[+1]	845.912	2	1690.82	1690.8	0	7.1	17	Non	575.06	545.27	66.2	7.79	1651	>sp|P02817|AMELX_BOVIN Amelogenin, X isoform OS=Bos taurus OX=9913 GN=AMELX PE=1 SV=2	1	hf1_10472_ebo_32_1_261219.ScanId;v=1;d1=15892.15892.2	controllerType=0 controllerNumber=1 scan=15892	34.832
20942:2	1	S.M[+15.995]PLPPHPGHPGYIN[+0.984]F.S		M[+16], N[+1]	845.911	2	1690.81	1690.8	0	5.8	17	Non	588.37	543.48	68.85	7.95	1651	>sp|P02817|AMELX_BOVIN Amelogenin, X isoform OS=Bos taurus OX=9913 GN=AMELX PE=1 SV=2	1	hf1_10472_ebo_32_1_261219.ScanId;v=1;d1=16291.16291.2	controllerType=0 controllerNumber=1 scan=16291	35.5199
22708:2	1	S.MPLPPHPGHP[+15.995]GYIN[+0.984]F.S		N[+1], P[+16]	845.91	2	1690.81	1690.8	0	4.5	17	Non	591.65	564.02	11.73	7.41	1651	>sp|P02817|AMELX_BOVIN Amelogenin, X isoform OS=Bos taurus OX=9913 GN=AMELX PE=1 SV=2	1	hf1_10472_ebo_32_1_261219.ScanId;v=1;d1=17502.17502.2	controllerType=0 controllerNumber=1 scan=17502	37.611
18675:2	1	S.M[+15.995]PLPPHPGHPGY[+15.995]INF.S		M[+16], Y[+16]	853.415	2	1705.82	1705.82	0	3.8	17	Non	597.84	597.84	0	7.41	1651	>sp|P02817|AMELX_BOVIN Amelogenin, X isoform OS=Bos taurus OX=9913 GN=AMELX PE=1 SV=2	1	hf1_10472_ebo_32_1_261219.ScanId;v=1;d1=14687.14687.2	controllerType=0 controllerNumber=1 scan=14687	32.7316
21517:2	1	S.M[+15.995]PLPPHPGHPGYIN[+0.984]F.S		M[+16], N[+1]	845.91	2	1690.81	1690.8	0	4.3	17	Non	609.44	547.89	81.96	8.68	1651	>sp|P02817|AMELX_BOVIN Amelogenin, X isoform OS=Bos taurus OX=9913 GN=AMELX PE=1 SV=2	1	hf1_10472_ebo_32_1_261219.ScanId;v=1;d1=16684.16684.2	controllerType=0 controllerNumber=1 scan=16684	36.2046
18394:2	1	S.M[+15.995]PLPPHPGHPGY[+15.995]INF.S		M[+16], Y[+16]	853.415	2	1705.82	1705.82	0	3.7	17	Non	615.06	615.06	1.45	8.68	1651	>sp|P02817|AMELX_BOVIN Amelogenin, X isoform OS=Bos taurus OX=9913 GN=AMELX PE=1 SV=2	1	hf1_10472_ebo_32_1_261219.ScanId;v=1;d1=14486.14486.2	controllerType=0 controllerNumber=1 scan=14486	32.3858
21225:2	1	S.M[+15.995]PLPPHPGHPGYIN[+0.984]F.S		M[+16], N[+1]	845.91	2	1690.81	1690.8	0	5.2	17	Non	641.2	580.62	87.03	9.01	1651	>sp|P02817|AMELX_BOVIN Amelogenin, X isoform OS=Bos taurus OX=9913 GN=AMELX PE=1 SV=2	1	hf1_10472_ebo_32_1_261219.ScanId;v=1;d1=16483.16483.2	controllerType=0 controllerNumber=1 scan=16483	35.859
21845:3	1	S.MPLPPHPGHPGYINFS.Y			587.627	3	1760.87	1760.86	0	5.2	17	Non	212.78	64.29	64.29	1.48	1651	>sp|P02817|AMELX_BOVIN Amelogenin, X isoform OS=Bos taurus OX=9913 GN=AMELX PE=1 SV=2	1	hf1_10472_ebo_32_1_261219.ScanId;v=1;d1=16905.16905.3	controllerType=0 controllerNumber=1 scan=16905	36.5804
21535:3	1	S.MPLPPHPGHPGYINFS.Y			587.627	3	1760.87	1760.86	0	4.4	17	Non	323.37	109.55	109.55	3.19	1651	>sp|P02817|AMELX_BOVIN Amelogenin, X isoform OS=Bos taurus OX=9913 GN=AMELX PE=1 SV=2	1	hf1_10472_ebo_32_1_261219.ScanId;v=1;d1=16696.16696.3	controllerType=0 controllerNumber=1 scan=16696	36.224
21239:3	1	S.MPLPPHPGHPGYINFS.Y			587.627	3	1760.87	1760.86	0	5.5	17	Non	360.46	140.61	140.61	4.04	1651	>sp|P02817|AMELX_BOVIN Amelogenin, X isoform OS=Bos taurus OX=9913 GN=AMELX PE=1 SV=2	1	hf1_10472_ebo_32_1_261219.ScanId;v=1;d1=16494.16494.3	controllerType=0 controllerNumber=1 scan=16494	35.8779
49167:3	1	S.MPLPPHPGHPGYINFS[+79.966].Y		S[+80]	614.283	3	1840.83	1840.82	0	5.5	17	Non	92.86	92.86	92.86	2.34	1651	>sp|P02817|AMELX_BOVIN Amelogenin, X isoform OS=Bos taurus OX=9913 GN=AMELX PE=1 SV=2	1	hf1_10472_ebo_32_1_261219.ScanId;v=1;d1=35727.35727.6	controllerType=0 controllerNumber=1 scan=35727	71.8539
19482:3	1	S.MP[+15.995]LPPHPGHPGYINFS.Y		P[+16]	592.959	3	1776.86	1776.85	0	5.3	17	Non	192.26	55.73	4	2.35	1651	>sp|P02817|AMELX_BOVIN Amelogenin, X isoform OS=Bos taurus OX=9913 GN=AMELX PE=1 SV=2	1	hf1_10472_ebo_32_1_261219.ScanId;v=1;d1=15255.15255.3	controllerType=0 controllerNumber=1 scan=15255	33.7275
21830:2	1	S.MPLPPHPGHPGYIN[+0.984]FS.Y		N[+1]	881.426	2	1761.85	1761.84	0	1.9	17	Non	203.45	168.34	168.34	2.4	1651	>sp|P02817|AMELX_BOVIN Amelogenin, X isoform OS=Bos taurus OX=9913 GN=AMELX PE=1 SV=2	1	hf1_10472_ebo_32_1_261219.ScanId;v=1;d1=16895.16895.2	controllerType=0 controllerNumber=1 scan=16895	36.5637
23116:2	1	S.MPLPPHPGHPGYINFS[+79.966].Y		S[+80]	920.919	2	1840.83	1840.82	0	3.6	17	Non	216.13	105.74	105.74	2.33	1651	>sp|P02817|AMELX_BOVIN Amelogenin, X isoform OS=Bos taurus OX=9913 GN=AMELX PE=1 SV=2	1	hf1_10472_ebo_32_1_261219.ScanId;v=1;d1=17786.17786.2	controllerType=0 controllerNumber=1 scan=17786	38.098
20381:3	1	S.MP[+15.995]LPPHPGHPGYINFS.Y		P[+16]	592.957	3	1776.86	1776.85	0	1.4	17	Non	219.28	5.63	5.63	1.3	1651	>sp|P02817|AMELX_BOVIN Amelogenin, X isoform OS=Bos taurus OX=9913 GN=AMELX PE=1 SV=2	1	hf1_10472_ebo_32_1_261219.ScanId;v=1;d1=15896.15896.3	controllerType=0 controllerNumber=1 scan=15896	34.8372
25247:3	1	S.MPLPPHPGHPGYINFS[+79.966].Y		S[+80]	614.286	3	1840.84	1840.82	0	9.9	17	Non	237.37	226.88	179.61	2.89	1651	>sp|P02817|AMELX_BOVIN Amelogenin, X isoform OS=Bos taurus OX=9913 GN=AMELX PE=1 SV=2	1	hf1_10472_ebo_32_1_261219.ScanId;v=1;d1=19187.19187.3	controllerType=0 controllerNumber=1 scan=19187	40.5091
22429:3	1	S.MPLPPHPGHPGYIN[+0.984]FS.Y		N[+1]	587.956	3	1761.85	1761.84	0	6.1	17	Non	265	138.22	138.22	3.46	1651	>sp|P02817|AMELX_BOVIN Amelogenin, X isoform OS=Bos taurus OX=9913 GN=AMELX PE=1 SV=2	1	hf1_10472_ebo_32_1_261219.ScanId;v=1;d1=17309.17309.3	controllerType=0 controllerNumber=1 scan=17309	37.2807
22132:3	1	S.MPLPPHPGHPGYIN[+0.984]FS.Y		N[+1]	587.955	3	1761.85	1761.84	0	4.2	17	Non	290.74	188.22	188.22	4.56	1651	>sp|P02817|AMELX_BOVIN Amelogenin, X isoform OS=Bos taurus OX=9913 GN=AMELX PE=1 SV=2	1	hf1_10472_ebo_32_1_261219.ScanId;v=1;d1=17105.17105.3	controllerType=0 controllerNumber=1 scan=17105	36.9287
19308:2	1	S.M[+15.995]PLPPHPGHPGYINFS.Y		M[+16]	888.938	2	1776.87	1776.85	0	9	17	Non	298.69	127.3	25.94	3.51	1651	>sp|P02817|AMELX_BOVIN Amelogenin, X isoform OS=Bos taurus OX=9913 GN=AMELX PE=1 SV=2	1	hf1_10472_ebo_32_1_261219.ScanId;v=1;d1=15128.15128.2	controllerType=0 controllerNumber=1 scan=15128	33.503
49943:3	1	S.MPLPPHPGHPGYINFS[+79.966].Y		S[+80]	614.284	3	1840.84	1840.82	0	7.1	17	Non	308.34	308.34	185.7	5.14	1651	>sp|P02817|AMELX_BOVIN Amelogenin, X isoform OS=Bos taurus OX=9913 GN=AMELX PE=1 SV=2	1	hf1_10472_ebo_32_1_261219.ScanId;v=1;d1=36386.36386.3	controllerType=0 controllerNumber=1 scan=36386	73.4375
18969:2	1	S.M[+15.995]PLPPHPGHPGYINFS.Y		M[+16]	888.936	2	1776.86	1776.85	0	6.8	17	Non	310.78	130.98	13.33	4.09	1651	>sp|P02817|AMELX_BOVIN Amelogenin, X isoform OS=Bos taurus OX=9913 GN=AMELX PE=1 SV=2	1	hf1_10472_ebo_32_1_261219.ScanId;v=1;d1=14894.14894.2	controllerType=0 controllerNumber=1 scan=14894	33.0944
18694:2	1	S.M[+15.995]PLPPHPGHPGYINFS.Y		M[+16]	888.935	2	1776.86	1776.85	0	5.3	17	Non	325.46	209.46	5.06	5.58	1651	>sp|P02817|AMELX_BOVIN Amelogenin, X isoform OS=Bos taurus OX=9913 GN=AMELX PE=1 SV=2	1	hf1_10472_ebo_32_1_261219.ScanId;v=1;d1=14699.14699.2	controllerType=0 controllerNumber=1 scan=14699	32.7511
17967:2	1	S.M[+15.995]PLPPHPGHPGYINFS.Y		M[+16]	888.934	2	1776.86	1776.85	0	4.2	17	Non	328.37	230.75	20.25	5.3	1651	>sp|P02817|AMELX_BOVIN Amelogenin, X isoform OS=Bos taurus OX=9913 GN=AMELX PE=1 SV=2	1	hf1_10472_ebo_32_1_261219.ScanId;v=1;d1=14178.14178.2	controllerType=0 controllerNumber=1 scan=14178	31.8579
22465:2	1	S.MPLPPHPGHPGYIN[+0.984]FS.Y		N[+1]	881.429	2	1761.85	1761.84	0	4.7	17	Non	342.52	312.88	312.88	5.46	1651	>sp|P02817|AMELX_BOVIN Amelogenin, X isoform OS=Bos taurus OX=9913 GN=AMELX PE=1 SV=2	1	hf1_10472_ebo_32_1_261219.ScanId;v=1;d1=17333.17333.2	controllerType=0 controllerNumber=1 scan=17333	37.3204
18599:3	1	S.MP[+15.995]LPPHPGHPGYINFS.Y		P[+16]	592.958	3	1776.86	1776.85	0	3.1	17	Non	347.19	269.47	4	4.99	1651	>sp|P02817|AMELX_BOVIN Amelogenin, X isoform OS=Bos taurus OX=9913 GN=AMELX PE=1 SV=2	1	hf1_10472_ebo_32_1_261219.ScanId;v=1;d1=14630.14630.3	controllerType=0 controllerNumber=1 scan=14630	32.6287
18311:3	1	S.MP[+15.995]LPPHPGHPGYINFS.Y		P[+16]	592.958	3	1776.86	1776.85	0	3.9	17	Non	381.21	299.93	4	5.2	1651	>sp|P02817|AMELX_BOVIN Amelogenin, X isoform OS=Bos taurus OX=9913 GN=AMELX PE=1 SV=2	1	hf1_10472_ebo_32_1_261219.ScanId;v=1;d1=14429.14429.3	controllerType=0 controllerNumber=1 scan=14429	32.2859
24608:3	1	S.MPLPPHPGHPGYINFS[+79.966].Y		S[+80]	614.285	3	1840.84	1840.82	0	8.5	17	Non	387.02	387.02	280.29	6.52	1651	>sp|P02817|AMELX_BOVIN Amelogenin, X isoform OS=Bos taurus OX=9913 GN=AMELX PE=1 SV=2	1	hf1_10472_ebo_32_1_261219.ScanId;v=1;d1=18781.18781.3	controllerType=0 controllerNumber=1 scan=18781	39.8149
23392:3	1	S.MPLPPHPGHPGYINFS[+79.966].Y		S[+80]	614.284	3	1840.84	1840.82	0	6.6	17	Non	399.02	399.02	302.65	6.47	1651	>sp|P02817|AMELX_BOVIN Amelogenin, X isoform OS=Bos taurus OX=9913 GN=AMELX PE=1 SV=2	1	hf1_10472_ebo_32_1_261219.ScanId;v=1;d1=17976.17976.3	controllerType=0 controllerNumber=1 scan=17976	38.4248
23978:3	1	S.MPLPPHPGHPGYINFS[+79.966].Y		S[+80]	614.284	3	1840.84	1840.82	0	7.3	17	Non	433.24	340.36	278.82	5.67	1651	>sp|P02817|AMELX_BOVIN Amelogenin, X isoform OS=Bos taurus OX=9913 GN=AMELX PE=1 SV=2	1	hf1_10472_ebo_32_1_261219.ScanId;v=1;d1=18375.18375.3	controllerType=0 controllerNumber=1 scan=18375	39.1158
18272:2	1	S.M[+15.995]PLPPHPGHPGYINFS.Y		M[+16]	888.933	2	1776.86	1776.85	0	3.5	17	Non	438.14	393.68	35.58	6.43	1651	>sp|P02817|AMELX_BOVIN Amelogenin, X isoform OS=Bos taurus OX=9913 GN=AMELX PE=1 SV=2	1	hf1_10472_ebo_32_1_261219.ScanId;v=1;d1=14401.14401.2	controllerType=0 controllerNumber=1 scan=14401	32.2361
24284:3	1	S.MPLPPHPGHPGYINFS[+79.966].Y		S[+80]	614.284	3	1840.84	1840.82	0	7.9	17	Non	450.31	353.19	264.73	5.73	1651	>sp|P02817|AMELX_BOVIN Amelogenin, X isoform OS=Bos taurus OX=9913 GN=AMELX PE=1 SV=2	1	hf1_10472_ebo_32_1_261219.ScanId;v=1;d1=18575.18575.3	controllerType=0 controllerNumber=1 scan=18575	39.4588
24610:2	1	S.MPLPPHPGHPGYINFS[+79.966].Y		S[+80]	920.921	2	1840.84	1840.82	0	6.3	17	Non	454.64	454.64	228.03	7.09	1651	>sp|P02817|AMELX_BOVIN Amelogenin, X isoform OS=Bos taurus OX=9913 GN=AMELX PE=1 SV=2	1	hf1_10472_ebo_32_1_261219.ScanId;v=1;d1=18782.18782.2	controllerType=0 controllerNumber=1 scan=18782	39.8157
23686:3	1	S.MPLPPHPGHPGYINFS[+79.966].Y		S[+80]	614.283	3	1840.83	1840.82	0	5.9	17	Non	507.68	412.11	330.7	6.86	1651	>sp|P02817|AMELX_BOVIN Amelogenin, X isoform OS=Bos taurus OX=9913 GN=AMELX PE=1 SV=2	1	hf1_10472_ebo_32_1_261219.ScanId;v=1;d1=18176.18176.3	controllerType=0 controllerNumber=1 scan=18176	38.7738
23979:2	1	S.MPLPPHPGHPGYINFS[+79.966].Y		S[+80]	920.922	2	1840.84	1840.82	0	6.7	17	Non	688.59	688.59	326.58	10.46	1651	>sp|P02817|AMELX_BOVIN Amelogenin, X isoform OS=Bos taurus OX=9913 GN=AMELX PE=1 SV=2	1	hf1_10472_ebo_32_1_261219.ScanId;v=1;d1=18376.18376.2	controllerType=0 controllerNumber=1 scan=18376	39.1165
23403:2	1	S.MPLPPHPGHPGYINFS[+79.966].Y		S[+80]	920.921	2	1840.84	1840.82	0	6	17	Non	709.28	709.28	338.54	11.01	1651	>sp|P02817|AMELX_BOVIN Amelogenin, X isoform OS=Bos taurus OX=9913 GN=AMELX PE=1 SV=2	1	hf1_10472_ebo_32_1_261219.ScanId;v=1;d1=17983.17983.2	controllerType=0 controllerNumber=1 scan=17983	38.4368
24285:2	1	S.MPLPPHPGHPGYINFS[+79.966].Y		S[+80]	920.922	2	1840.84	1840.82	0	7.3	17	Non	721.32	721.32	361.01	11.25	1651	>sp|P02817|AMELX_BOVIN Amelogenin, X isoform OS=Bos taurus OX=9913 GN=AMELX PE=1 SV=2	1	hf1_10472_ebo_32_1_261219.ScanId;v=1;d1=18576.18576.2	controllerType=0 controllerNumber=1 scan=18576	39.4598
23687:2	1	S.MPLPPHPGHPGYINFS[+79.966].Y		S[+80]	920.921	2	1840.83	1840.82	0	5.7	17	Non	763.81	763.81	361.16	12.46	1651	>sp|P02817|AMELX_BOVIN Amelogenin, X isoform OS=Bos taurus OX=9913 GN=AMELX PE=1 SV=2	1	hf1_10472_ebo_32_1_261219.ScanId;v=1;d1=18177.18177.2	controllerType=0 controllerNumber=1 scan=18177	38.7745
47153:3	1	S.MP[+15.995]LPPHPGHPGYINFS[+79.966].Y		P[+16], S[+80]	619.615	3	1856.83	1856.82	0	6.7	17	Non	43.49	43.49	4	1.48	1651	>sp|P02817|AMELX_BOVIN Amelogenin, X isoform OS=Bos taurus OX=9913 GN=AMELX PE=1 SV=2	1	hf1_10472_ebo_32_1_261219.ScanId;v=1;d1=34073.34073.3	controllerType=0 controllerNumber=1 scan=34073	68.1973
00982:3	1	S.MP[+15.995]LPPHPGHPGYINFS[+79.966].Y		P[+16], S[+80]	619.612	3	1856.82	1856.82	0	1.5	17	Non	79.89	79.89	4	1.54	1651	>sp|P02817|AMELX_BOVIN Amelogenin, X isoform OS=Bos taurus OX=9913 GN=AMELX PE=1 SV=2	1	hf1_10472_ebo_32_1_261219.ScanId;v=1;d1=2367.2367.3	controllerType=0 controllerNumber=1 scan=2367	11.6773
00662:3	1	S.MP[+15.995]LPPHPGHPGYINFS[+79.966].Y		P[+16], S[+80]	619.614	3	1856.83	1856.82	0	4.1	17	Non	86.33	86.33	4	2.3	1651	>sp|P02817|AMELX_BOVIN Amelogenin, X isoform OS=Bos taurus OX=9913 GN=AMELX PE=1 SV=2	1	hf1_10472_ebo_32_1_261219.ScanId;v=1;d1=2103.2103.3	controllerType=0 controllerNumber=1 scan=2103	11.0017
47319:3	1	S.MP[+15.995]LPPHPGHPGYINFS[+79.966].Y		P[+16], S[+80]	619.613	3	1856.83	1856.82	0	3.3	17	Non	97.55	97.55	4	2.3	1651	>sp|P02817|AMELX_BOVIN Amelogenin, X isoform OS=Bos taurus OX=9913 GN=AMELX PE=1 SV=2	1	hf1_10472_ebo_32_1_261219.ScanId;v=1;d1=34217.34217.3	controllerType=0 controllerNumber=1 scan=34217	68.5405
47776:3	1	S.MP[+15.995]LPPHPGHPGYINFS[+79.966].Y		P[+16], S[+80]	619.615	3	1856.83	1856.82	0	6.1	17	Non	118.06	118.06	4	2.34	1651	>sp|P02817|AMELX_BOVIN Amelogenin, X isoform OS=Bos taurus OX=9913 GN=AMELX PE=1 SV=2	1	hf1_10472_ebo_32_1_261219.ScanId;v=1;d1=34590.34590.3	controllerType=0 controllerNumber=1 scan=34590	69.3441
01212:3	1	S.MP[+15.995]LPPHPGHPGYINFS[+79.966].Y		P[+16], S[+80]	619.612	3	1856.82	1856.82	0	2.1	17	Non	122.12	122.12	4	2.32	1651	>sp|P02817|AMELX_BOVIN Amelogenin, X isoform OS=Bos taurus OX=9913 GN=AMELX PE=1 SV=2	1	hf1_10472_ebo_32_1_261219.ScanId;v=1;d1=2537.2537.3	controllerType=0 controllerNumber=1 scan=2537	12.0188
00763:3	1	S.MP[+15.995]LPPHPGHPGYINFS[+79.966].Y		P[+16], S[+80]	619.614	3	1856.83	1856.82	0	5	17	Non	133.53	133.53	4	2.75	1651	>sp|P02817|AMELX_BOVIN Amelogenin, X isoform OS=Bos taurus OX=9913 GN=AMELX PE=1 SV=2	1	hf1_10472_ebo_32_1_261219.ScanId;v=1;d1=2210.2210.3	controllerType=0 controllerNumber=1 scan=2210	11.3415
25864:2	1	S.MPLPPHPGHPGYIN[+0.984]FS[+79.966].Y		N[+1], S[+80]	921.414	2	1841.82	1841.81	0	6.6	17	Non	148.47	148.47	84.05	2.64	1651	>sp|P02817|AMELX_BOVIN Amelogenin, X isoform OS=Bos taurus OX=9913 GN=AMELX PE=1 SV=2	1	hf1_10472_ebo_32_1_261219.ScanId;v=1;d1=19593.19593.2	controllerType=0 controllerNumber=1 scan=19593	41.1996
25860:3	1	S.MPLPPHPGHPGYIN[+0.984]FS[+79.966].Y		N[+1], S[+80]	614.611	3	1841.82	1841.81	0	6.2	17	Non	151.21	151.21	151.21	2.53	1651	>sp|P02817|AMELX_BOVIN Amelogenin, X isoform OS=Bos taurus OX=9913 GN=AMELX PE=1 SV=2	1	hf1_10472_ebo_32_1_261219.ScanId;v=1;d1=19591.19591.3	controllerType=0 controllerNumber=1 scan=19591	41.1977
47523:3	1	S.MP[+15.995]LPPHPGHPGYINFS[+79.966].Y		P[+16], S[+80]	619.614	3	1856.83	1856.82	0	4.2	17	Non	155.8	155.8	5.8	2.42	1651	>sp|P02817|AMELX_BOVIN Amelogenin, X isoform OS=Bos taurus OX=9913 GN=AMELX PE=1 SV=2	1	hf1_10472_ebo_32_1_261219.ScanId;v=1;d1=34384.34384.3	controllerType=0 controllerNumber=1 scan=34384	68.8893
19260:3	1	S.MP[+15.995]LPPHPGHPGYINFS[+79.966].Y		P[+16], S[+80]	619.613	3	1856.82	1856.82	0	3.2	17	Non	164.51	164.51	5.8	2.48	1651	>sp|P02817|AMELX_BOVIN Amelogenin, X isoform OS=Bos taurus OX=9913 GN=AMELX PE=1 SV=2	1	hf1_10472_ebo_32_1_261219.ScanId;v=1;d1=15093.15093.2	controllerType=0 controllerNumber=1 scan=15093	33.4414
01464:3	1	S.MP[+15.995]LPPHPGHPGYINFS[+79.966].Y		P[+16], S[+80]	619.614	3	1856.83	1856.82	0	3.9	17	Non	170.9	170.9	4	2.97	1651	>sp|P02817|AMELX_BOVIN Amelogenin, X isoform OS=Bos taurus OX=9913 GN=AMELX PE=1 SV=2	1	hf1_10472_ebo_32_1_261219.ScanId;v=1;d1=2720.2720.3	controllerType=0 controllerNumber=1 scan=2720	12.3623
22303:2	1	S.MP[+31.990]LPPHPGHPGYINFS[+79.966].Y		P[+32], S[+80]	936.907	2	1872.81	1872.81	0	-3.5	17	Non	171.55	171.55	1.8	2.37	1651	>sp|P02817|AMELX_BOVIN Amelogenin, X isoform OS=Bos taurus OX=9913 GN=AMELX PE=1 SV=2	1	hf1_10472_ebo_32_1_261219.ScanId;v=1;d1=17221.17221.2	controllerType=0 controllerNumber=1 scan=17221	37.1267
48188:3	1	S.MP[+15.995]LPPHPGHPGYINFS[+79.966].Y		P[+16], S[+80]	619.614	3	1856.83	1856.82	0	3.9	17	Non	174.39	174.39	5.8	2.97	1651	>sp|P02817|AMELX_BOVIN Amelogenin, X isoform OS=Bos taurus OX=9913 GN=AMELX PE=1 SV=2	1	hf1_10472_ebo_32_1_261219.ScanId;v=1;d1=34928.34928.6	controllerType=0 controllerNumber=1 scan=34928	70.0838
25432:2	1	S.MPLPPHPGHPGYIN[+0.984]FS[+79.966].Y		N[+1], S[+80]	921.414	2	1841.82	1841.81	0	6.7	17	Non	179.99	179.99	111.71	3.4	1651	>sp|P02817|AMELX_BOVIN Amelogenin, X isoform OS=Bos taurus OX=9913 GN=AMELX PE=1 SV=2	1	hf1_10472_ebo_32_1_261219.ScanId;v=1;d1=19312.19312.2	controllerType=0 controllerNumber=1 scan=19312	40.7208
23542:2	1	S.MPLPPHPGHPGY[+15.995]INFS[+79.966].Y		S[+80], Y[+16]	928.914	2	1856.82	1856.82	0	0.7	17	Non	187.9	187.9	0	2.4	1651	>sp|P02817|AMELX_BOVIN Amelogenin, X isoform OS=Bos taurus OX=9913 GN=AMELX PE=1 SV=2	1	hf1_10472_ebo_32_1_261219.ScanId;v=1;d1=18076.18076.2	controllerType=0 controllerNumber=1 scan=18076	38.5998
23499:3	1	S.MPLPPHPGHP[+15.995]GYINFS[+79.966].Y		P[+16], S[+80]	619.609	3	1856.81	1856.82	0	-3.6	17	Non	207.21	207.21	3.8	2.8	1651	>sp|P02817|AMELX_BOVIN Amelogenin, X isoform OS=Bos taurus OX=9913 GN=AMELX PE=1 SV=2	1	hf1_10472_ebo_32_1_261219.ScanId;v=1;d1=18048.18048.3	controllerType=0 controllerNumber=1 scan=18048	38.5512
21992:2	1	S.M[+31.990]PLPPHPGHPGYINFS[+79.966].Y		M[+32], S[+80]	936.901	2	1872.8	1872.81	0	-10	17	Non	216.45	216.45	1.93	2.73	1651	>sp|P02817|AMELX_BOVIN Amelogenin, X isoform OS=Bos taurus OX=9913 GN=AMELX PE=1 SV=2	1	hf1_10472_ebo_32_1_261219.ScanId;v=1;d1=17008.17008.2	controllerType=0 controllerNumber=1 scan=17008	36.7595
22311:3	1	S.M[+31.990]PLPPHPGHPGYINFS[+79.966].Y		M[+32], S[+80]	624.942	3	1872.81	1872.81	0	-1.4	17	Non	218.88	218.88	6.61	2.79	1651	>sp|P02817|AMELX_BOVIN Amelogenin, X isoform OS=Bos taurus OX=9913 GN=AMELX PE=1 SV=2	1	hf1_10472_ebo_32_1_261219.ScanId;v=1;d1=17228.17228.3	controllerType=0 controllerNumber=1 scan=17228	37.1379
22766:3	1	S.MP[+15.995]LPPHPGHPGYINFS[+79.966].Y		P[+16], S[+80]	619.608	3	1856.81	1856.82	0	-5.2	17	Non	244.96	244.96	13.66	3.47	1651	>sp|P02817|AMELX_BOVIN Amelogenin, X isoform OS=Bos taurus OX=9913 GN=AMELX PE=1 SV=2	1	hf1_10472_ebo_32_1_261219.ScanId;v=1;d1=17541.17541.3	controllerType=0 controllerNumber=1 scan=17541	37.6801
22012:3	1	S.MP[+31.990]LPPHPGHPGYINFS[+79.966].Y		P[+32], S[+80]	624.949	3	1872.83	1872.81	0	9.3	17	Non	245.2	245.2	1.8	3.97	1651	>sp|P02817|AMELX_BOVIN Amelogenin, X isoform OS=Bos taurus OX=9913 GN=AMELX PE=1 SV=2	1	hf1_10472_ebo_32_1_261219.ScanId;v=1;d1=17020.17020.3	controllerType=0 controllerNumber=1 scan=17020	36.7802
21114:3	1	S.MP[+31.990]LPPHPGHPGYINFS[+79.966].Y		P[+32], S[+80]	624.944	3	1872.82	1872.81	0	2.2	17	Non	254.62	254.62	1.8	3.98	1651	>sp|P02817|AMELX_BOVIN Amelogenin, X isoform OS=Bos taurus OX=9913 GN=AMELX PE=1 SV=2	1	hf1_10472_ebo_32_1_261219.ScanId;v=1;d1=16411.16411.3	controllerType=0 controllerNumber=1 scan=16411	35.7287
21716:3	1	S.M[+31.990]PLPPHPGHPGYINFS[+79.966].Y		M[+32], S[+80]	624.937	3	1872.8	1872.81	0	-9.8	17	Non	266.63	266.63	6.59	3.54	1651	>sp|P02817|AMELX_BOVIN Amelogenin, X isoform OS=Bos taurus OX=9913 GN=AMELX PE=1 SV=2	1	hf1_10472_ebo_32_1_261219.ScanId;v=1;d1=16819.16819.3	controllerType=0 controllerNumber=1 scan=16819	36.4344
22968:2	1	S.M[+15.995]PLPPHPGHPGYINFS[+79.966].Y		M[+16], S[+80]	928.912	2	1856.82	1856.82	0	-0.8	17	Non	277.88	277.88	8.66	4.43	1651	>sp|P02817|AMELX_BOVIN Amelogenin, X isoform OS=Bos taurus OX=9913 GN=AMELX PE=1 SV=2	1	hf1_10472_ebo_32_1_261219.ScanId;v=1;d1=17681.17681.2	controllerType=0 controllerNumber=1 scan=17681	37.9148
21599:3	1	S.M[+15.995]PLPPHPGHPGYINFS[+79.966].Y		M[+16], S[+80]	619.609	3	1856.81	1856.82	0	-3.6	17	Non	281.91	281.91	5.56	4.45	1651	>sp|P02817|AMELX_BOVIN Amelogenin, X isoform OS=Bos taurus OX=9913 GN=AMELX PE=1 SV=2	1	hf1_10472_ebo_32_1_261219.ScanId;v=1;d1=16739.16739.3	controllerType=0 controllerNumber=1 scan=16739	36.2973
22296:2	1	S.M[+31.990]PLPPHPGHPGYINFS[+79.966].Y		M[+32], S[+80]	936.907	2	1872.81	1872.81	0	-3.5	17	Non	287.11	287.11	10.2	4.67	1651	>sp|P02817|AMELX_BOVIN Amelogenin, X isoform OS=Bos taurus OX=9913 GN=AMELX PE=1 SV=2	1	hf1_10472_ebo_32_1_261219.ScanId;v=1;d1=17216.17216.2	controllerType=0 controllerNumber=1 scan=17216	37.1192
21301:3	1	S.M[+15.995]PLPPHPGHPGYINFS[+79.966].Y		M[+16], S[+80]	619.61	3	1856.82	1856.82	0	-2	17	Non	288.15	288.15	15.45	4.43	1651	>sp|P02817|AMELX_BOVIN Amelogenin, X isoform OS=Bos taurus OX=9913 GN=AMELX PE=1 SV=2	1	hf1_10472_ebo_32_1_261219.ScanId;v=1;d1=16537.16537.3	controllerType=0 controllerNumber=1 scan=16537	35.9522
20733:3	1	S.MP[+15.995]LPPHPGHPGYINFS[+79.966].Y		P[+16], S[+80]	619.614	3	1856.83	1856.82	0	4.7	17	Non	289.58	289.58	4	5.31	1651	>sp|P02817|AMELX_BOVIN Amelogenin, X isoform OS=Bos taurus OX=9913 GN=AMELX PE=1 SV=2	1	hf1_10472_ebo_32_1_261219.ScanId;v=1;d1=16144.16144.3	controllerType=0 controllerNumber=1 scan=16144	35.2687
21010:3	1	S.M[+15.995]PLPPHPGHPGYINFS[+79.966].Y		M[+16], S[+80]	619.611	3	1856.82	1856.82	0	0.4	17	Non	297.22	297.22	6.16	4.58	1651	>sp|P02817|AMELX_BOVIN Amelogenin, X isoform OS=Bos taurus OX=9913 GN=AMELX PE=1 SV=2	1	hf1_10472_ebo_32_1_261219.ScanId;v=1;d1=16340.16340.3	controllerType=0 controllerNumber=1 scan=16340	35.6064
19205:3	1	S.MP[+15.995]LPPHPGHPGYIN[+0.984]FS.Y		N[+1], P[+16]	593.285	3	1777.84	1777.84	0	1.6	17	Non	312.53	233.75	4	4.47	1651	>sp|P02817|AMELX_BOVIN Amelogenin, X isoform OS=Bos taurus OX=9913 GN=AMELX PE=1 SV=2	1	hf1_10472_ebo_32_1_261219.ScanId;v=1;d1=15055.15055.3	controllerType=0 controllerNumber=1 scan=15055	33.3768
18926:3	1	S.MP[+15.995]LPPHPGHPGYIN[+0.984]FS.Y		N[+1], P[+16]	593.285	3	1777.84	1777.84	0	1.9	17	Non	312.82	215.89	4	4.42	1651	>sp|P02817|AMELX_BOVIN Amelogenin, X isoform OS=Bos taurus OX=9913 GN=AMELX PE=1 SV=2	1	hf1_10472_ebo_32_1_261219.ScanId;v=1;d1=14865.14865.3	controllerType=0 controllerNumber=1 scan=14865	33.0402
21419:3	1	S.M[+31.990]PLPPHPGHPGYINFS[+79.966].Y		M[+32], S[+80]	624.944	3	1872.82	1872.81	0	2.3	17	Non	325.66	325.66	6.16	4.91	1651	>sp|P02817|AMELX_BOVIN Amelogenin, X isoform OS=Bos taurus OX=9913 GN=AMELX PE=1 SV=2	1	hf1_10472_ebo_32_1_261219.ScanId;v=1;d1=16617.16617.3	controllerType=0 controllerNumber=1 scan=16617	36.0881
20459:3	1	S.MP[+15.995]LPPHPGHPGYINFS[+79.966].Y		P[+16], S[+80]	619.614	3	1856.83	1856.82	0	4.7	17	Non	341.17	341.17	4	5.6	1651	>sp|P02817|AMELX_BOVIN Amelogenin, X isoform OS=Bos taurus OX=9913 GN=AMELX PE=1 SV=2	1	hf1_10472_ebo_32_1_261219.ScanId;v=1;d1=15950.15950.3	controllerType=0 controllerNumber=1 scan=15950	34.9298
19879:3	1	S.M[+15.995]PLPPHPGHPGYINFS[+79.966].Y		M[+16], S[+80]	619.614	3	1856.83	1856.82	0	5.2	17	Non	344.55	344.55	4.42	5.6	1651	>sp|P02817|AMELX_BOVIN Amelogenin, X isoform OS=Bos taurus OX=9913 GN=AMELX PE=1 SV=2	1	hf1_10472_ebo_32_1_261219.ScanId;v=1;d1=15546.15546.3	controllerType=0 controllerNumber=1 scan=15546	34.2362
20162:3	1	S.MP[+15.995]LPPHPGHPGYINFS[+79.966].Y		P[+16], S[+80]	619.614	3	1856.83	1856.82	0	5.1	17	Non	352.45	352.45	4	5.86	1651	>sp|P02817|AMELX_BOVIN Amelogenin, X isoform OS=Bos taurus OX=9913 GN=AMELX PE=1 SV=2	1	hf1_10472_ebo_32_1_261219.ScanId;v=1;d1=15739.15739.3	controllerType=0 controllerNumber=1 scan=15739	34.574
19600:3	1	S.MP[+15.995]LPPHPGHPGYINFS[+79.966].Y		P[+16], S[+80]	619.615	3	1856.83	1856.82	0	6	17	Non	378.15	361.32	4	6.8	1651	>sp|P02817|AMELX_BOVIN Amelogenin, X isoform OS=Bos taurus OX=9913 GN=AMELX PE=1 SV=2	1	hf1_10472_ebo_32_1_261219.ScanId;v=1;d1=15342.15342.3	controllerType=0 controllerNumber=1 scan=15342	33.8806
19617:2	1	S.M[+15.995]PLPPHPGHPGYINFS[+79.966].Y		M[+16], S[+80]	928.918	2	1856.83	1856.82	0	4.9	17	Non	405	405	20.13	7.03	1651	>sp|P02817|AMELX_BOVIN Amelogenin, X isoform OS=Bos taurus OX=9913 GN=AMELX PE=1 SV=2	1	hf1_10472_ebo_32_1_261219.ScanId;v=1;d1=15353.15353.2	controllerType=0 controllerNumber=1 scan=15353	33.8999
25248:3	1	S.MPLPPHPGHPGYIN[+0.984]FS[+79.966].Y		N[+1], S[+80]	614.612	3	1841.82	1841.81	0	7.2	17	Non	460.06	303.49	303.49	5.67	1651	>sp|P02817|AMELX_BOVIN Amelogenin, X isoform OS=Bos taurus OX=9913 GN=AMELX PE=1 SV=2	1	hf1_10472_ebo_32_1_261219.ScanId;v=1;d1=19187.19187.3	controllerType=0 controllerNumber=1 scan=19187	40.5091
24924:3	1	S.MPLPPHPGHPGYIN[+0.984]FS[+79.966].Y		N[+1], S[+80]	614.613	3	1841.82	1841.81	0	9	17	Non	478.35	356.65	341.12	5.78	1651	>sp|P02817|AMELX_BOVIN Amelogenin, X isoform OS=Bos taurus OX=9913 GN=AMELX PE=1 SV=2	1	hf1_10472_ebo_32_1_261219.ScanId;v=1;d1=18983.18983.3	controllerType=0 controllerNumber=1 scan=18983	40.161
21315:2	1	S.M[+15.995]PLPPHPGHPGYINFS[+79.966].Y		M[+16], S[+80]	928.91	2	1856.81	1856.82	0	-3.8	17	Non	502.75	502.75	7.67	6.21	1651	>sp|P02817|AMELX_BOVIN Amelogenin, X isoform OS=Bos taurus OX=9913 GN=AMELX PE=1 SV=2	1	hf1_10472_ebo_32_1_261219.ScanId;v=1;d1=16547.16547.2	controllerType=0 controllerNumber=1 scan=16547	35.9683
21609:2	1	S.M[+15.995]PLPPHPGHPGYINFS[+79.966].Y		M[+16], S[+80]	928.909	2	1856.81	1856.82	0	-4.1	17	Non	503.85	503.85	14.74	6.21	1651	>sp|P02817|AMELX_BOVIN Amelogenin, X isoform OS=Bos taurus OX=9913 GN=AMELX PE=1 SV=2	1	hf1_10472_ebo_32_1_261219.ScanId;v=1;d1=16746.16746.2	controllerType=0 controllerNumber=1 scan=16746	36.309
21030:2	1	S.M[+15.995]PLPPHPGHPGYINFS[+79.966].Y		M[+16], S[+80]	928.911	2	1856.81	1856.82	0	-2.4	17	Non	546.72	546.72	12.04	6.37	1651	>sp|P02817|AMELX_BOVIN Amelogenin, X isoform OS=Bos taurus OX=9913 GN=AMELX PE=1 SV=2	1	hf1_10472_ebo_32_1_261219.ScanId;v=1;d1=16354.16354.2	controllerType=0 controllerNumber=1 scan=16354	35.6315
25559:2	1	S.MPLPPHPGHPGYIN[+0.984]FS[+79.966].Y		N[+1], S[+80]	921.413	2	1841.82	1841.81	0	6.3	17	Non	568.78	474.76	355.44	8.46	1651	>sp|P02817|AMELX_BOVIN Amelogenin, X isoform OS=Bos taurus OX=9913 GN=AMELX PE=1 SV=2	1	hf1_10472_ebo_32_1_261219.ScanId;v=1;d1=19396.19396.2	controllerType=0 controllerNumber=1 scan=19396	40.8638
20738:2	1	S.M[+15.995]PLPPHPGHPGYINFS[+79.966].Y		M[+16], S[+80]	928.918	2	1856.83	1856.82	0	5.7	17	Non	607.87	607.87	36.94	9.46	1651	>sp|P02817|AMELX_BOVIN Amelogenin, X isoform OS=Bos taurus OX=9913 GN=AMELX PE=1 SV=2	1	hf1_10472_ebo_32_1_261219.ScanId;v=1;d1=16149.16149.2	controllerType=0 controllerNumber=1 scan=16149	35.2783
20460:2	1	S.M[+15.995]PLPPHPGHPGYINFS[+79.966].Y		M[+16], S[+80]	928.919	2	1856.83	1856.82	0	6.2	17	Non	624.04	624.04	29.34	9.46	1651	>sp|P02817|AMELX_BOVIN Amelogenin, X isoform OS=Bos taurus OX=9913 GN=AMELX PE=1 SV=2	1	hf1_10472_ebo_32_1_261219.ScanId;v=1;d1=15951.15951.2	controllerType=0 controllerNumber=1 scan=15951	34.9305
19894:2	1	S.M[+15.995]PLPPHPGHPGYINFS[+79.966].Y		M[+16], S[+80]	928.919	2	1856.83	1856.82	0	6.4	17	Non	644.2	644.2	43.11	9.46	1651	>sp|P02817|AMELX_BOVIN Amelogenin, X isoform OS=Bos taurus OX=9913 GN=AMELX PE=1 SV=2	1	hf1_10472_ebo_32_1_261219.ScanId;v=1;d1=15556.15556.2	controllerType=0 controllerNumber=1 scan=15556	34.2534
24611:2	1	S.MPLPPHPGHPGYIN[+0.984]FS[+79.966].Y		N[+1], S[+80]	921.415	2	1841.82	1841.81	0	7.7	17	Non	648.14	484.82	364.46	9.25	1651	>sp|P02817|AMELX_BOVIN Amelogenin, X isoform OS=Bos taurus OX=9913 GN=AMELX PE=1 SV=2	1	hf1_10472_ebo_32_1_261219.ScanId;v=1;d1=18782.18782.2	controllerType=0 controllerNumber=1 scan=18782	39.8157
20175:2	1	S.M[+15.995]PLPPHPGHPGYINFS[+79.966].Y		M[+16], S[+80]	928.919	2	1856.83	1856.82	0	6.1	17	Non	654.98	654.98	27.91	10.46	1651	>sp|P02817|AMELX_BOVIN Amelogenin, X isoform OS=Bos taurus OX=9913 GN=AMELX PE=1 SV=2	1	hf1_10472_ebo_32_1_261219.ScanId;v=1;d1=15750.15750.2	controllerType=0 controllerNumber=1 scan=15750	34.5919
25249:2	1	S.MPLPPHPGHPGYIN[+0.984]FS[+79.966].Y		N[+1], S[+80]	921.414	2	1841.82	1841.81	0	6.5	17	Non	661.93	489.61	359.56	10.46	1651	>sp|P02817|AMELX_BOVIN Amelogenin, X isoform OS=Bos taurus OX=9913 GN=AMELX PE=1 SV=2	1	hf1_10472_ebo_32_1_261219.ScanId;v=1;d1=19188.19188.2	controllerType=0 controllerNumber=1 scan=19188	40.5098
24925:2	1	S.MPLPPHPGHPGYIN[+0.984]FS[+79.966].Y		N[+1], S[+80]	921.414	2	1841.82	1841.81	0	7.1	17	Non	674.16	521.55	384.65	10.25	1651	>sp|P02817|AMELX_BOVIN Amelogenin, X isoform OS=Bos taurus OX=9913 GN=AMELX PE=1 SV=2	1	hf1_10472_ebo_32_1_261219.ScanId;v=1;d1=18984.18984.2	controllerType=0 controllerNumber=1 scan=18984	40.1617
19094:3	1	S.M[+15.995]PLPPHPGHPGY[+15.995]INFS[+79.966].Y		M[+16], S[+80], Y[+16]	624.947	3	1872.83	1872.81	0	6.2	17	Non	162.38	162.38	0	3.21	1651	>sp|P02817|AMELX_BOVIN Amelogenin, X isoform OS=Bos taurus OX=9913 GN=AMELX PE=1 SV=2	1	hf1_10472_ebo_32_1_261219.ScanId;v=1;d1=14980.14980.3	controllerType=0 controllerNumber=1 scan=14980	33.2432
23194:2	1	S.MP[+15.995]LP[+15.995]PHPGHPGYINFS[+79.966].Y		P[+16]*2, S[+80]	936.904	2	1872.8	1872.81	0	-6.9	17	Non	175.02	175.02	5.8	2.3	1651	>sp|P02817|AMELX_BOVIN Amelogenin, X isoform OS=Bos taurus OX=9913 GN=AMELX PE=1 SV=2	1	hf1_10472_ebo_32_1_261219.ScanId;v=1;d1=17840.17840.2	controllerType=0 controllerNumber=1 scan=17840	38.1954
24723:3	1	S.MPLPPHPGHP[+15.995]GYIN[+0.984]FS[+79.966].Y		N[+1], P[+16], S[+80]	619.941	3	1857.81	1857.8	0	3.3	17	Non	192.33	192.33	0	2.48	1651	>sp|P02817|AMELX_BOVIN Amelogenin, X isoform OS=Bos taurus OX=9913 GN=AMELX PE=1 SV=2	1	hf1_10472_ebo_32_1_261219.ScanId;v=1;d1=18852.18852.3	controllerType=0 controllerNumber=1 scan=18852	39.9346
20247:3	1	S.M[+15.995]PLPPHPGHP[+15.995]GYINFS[+79.966].Y		M[+16], P[+16], S[+80]	624.939	3	1872.8	1872.81	0	-5.8	17	Non	203.83	203.83	2.05	2.56	1651	>sp|P02817|AMELX_BOVIN Amelogenin, X isoform OS=Bos taurus OX=9913 GN=AMELX PE=1 SV=2	1	hf1_10472_ebo_32_1_261219.ScanId;v=1;d1=15804.15804.3	controllerType=0 controllerNumber=1 scan=15804	34.6805
20533:3	1	S.MP[+15.995]LPPHPGHP[+15.995]GYINFS[+79.966].Y		P[+16]*2, S[+80]	624.938	3	1872.8	1872.81	0	-7.2	17	Non	207.39	207.39	3.04	2.6	1651	>sp|P02817|AMELX_BOVIN Amelogenin, X isoform OS=Bos taurus OX=9913 GN=AMELX PE=1 SV=2	1	hf1_10472_ebo_32_1_261219.ScanId;v=1;d1=16006.16006.3	controllerType=0 controllerNumber=1 scan=16006	35.0253
20818:3	1	S.MP[+15.995]LPPHPGHP[+15.995]GYINFS[+79.966].Y		P[+16]*2, S[+80]	624.939	3	1872.8	1872.81	0	-6.6	17	Non	209.44	209.44	5.44	2.56	1651	>sp|P02817|AMELX_BOVIN Amelogenin, X isoform OS=Bos taurus OX=9913 GN=AMELX PE=1 SV=2	1	hf1_10472_ebo_32_1_261219.ScanId;v=1;d1=16206.16206.3	controllerType=0 controllerNumber=1 scan=16206	35.3733
20292:2	1	S.M[+15.995]PLPPHPGHPGY[+15.995]INFS[+79.966].Y		M[+16], S[+80], Y[+16]	936.915	2	1872.82	1872.81	0	4.4	17	Non	210.08	210.08	0	3.49	1651	>sp|P02817|AMELX_BOVIN Amelogenin, X isoform OS=Bos taurus OX=9913 GN=AMELX PE=1 SV=2	1	hf1_10472_ebo_32_1_261219.ScanId;v=1;d1=15837.15837.4	controllerType=0 controllerNumber=1 scan=15837	34.7378
22312:3	1	S.M[+31.990]PLPPHPGHPGYIN[+0.984]FS[+79.966].Y		M[+32], N[+1], S[+80]	625.274	3	1873.81	1873.8	0	5.9	17	Non	219.8	124.56	6.61	2.31	1651	>sp|P02817|AMELX_BOVIN Amelogenin, X isoform OS=Bos taurus OX=9913 GN=AMELX PE=1 SV=2	1	hf1_10472_ebo_32_1_261219.ScanId;v=1;d1=17228.17228.3	controllerType=0 controllerNumber=1 scan=17228	37.1379
23500:3	1	S.MPLPP[+15.995]HPGHPGYIN[+0.984]FS[+79.966].Y		N[+1], P[+16], S[+80]	619.943	3	1857.82	1857.8	0	6.9	17	Non	225.43	204.43	8.15	3.54	1651	>sp|P02817|AMELX_BOVIN Amelogenin, X isoform OS=Bos taurus OX=9913 GN=AMELX PE=1 SV=2	1	hf1_10472_ebo_32_1_261219.ScanId;v=1;d1=18048.18048.3	controllerType=0 controllerNumber=1 scan=18048	38.5512
22625:2	1	S.MP[+31.990]LPPHPGHPGYIN[+0.984]FS[+79.966].Y		N[+1], P[+32], S[+80]	937.406	2	1873.8	1873.8	0	3.2	17	Non	296.23	282.81	6.14	5.3	1651	>sp|P02817|AMELX_BOVIN Amelogenin, X isoform OS=Bos taurus OX=9913 GN=AMELX PE=1 SV=2	1	hf1_10472_ebo_32_1_261219.ScanId;v=1;d1=17445.17445.2	controllerType=0 controllerNumber=1 scan=17445	37.5127
20277:2	1	S.M[+15.995]PLPPHPGHPGY[+15.995]INFS[+79.966].Y		M[+16], S[+80], Y[+16]	936.91	2	1872.81	1872.81	0	-0.4	17	Non	298.1	298.1	0	4.31	1651	>sp|P02817|AMELX_BOVIN Amelogenin, X isoform OS=Bos taurus OX=9913 GN=AMELX PE=1 SV=2	1	hf1_10472_ebo_32_1_261219.ScanId;v=1;d1=15827.15827.4	controllerType=0 controllerNumber=1 scan=15827	34.7213
23790:3	1	S.MPLPPHPGHP[+15.995]GYIN[+0.984]FS[+79.966].Y		N[+1], P[+16], S[+80]	619.942	3	1857.81	1857.8	0	4	17	Non	299.49	245.57	4.86	4.48	1651	>sp|P02817|AMELX_BOVIN Amelogenin, X isoform OS=Bos taurus OX=9913 GN=AMELX PE=1 SV=2	1	hf1_10472_ebo_32_1_261219.ScanId;v=1;d1=18248.18248.3	controllerType=0 controllerNumber=1 scan=18248	38.8968
24403:3	1	S.MPLPPHPGHP[+15.995]GYIN[+0.984]FS[+79.966].Y		N[+1], P[+16], S[+80]	619.943	3	1857.82	1857.8	0	7	17	Non	303.76	283.54	5.58	5.36	1651	>sp|P02817|AMELX_BOVIN Amelogenin, X isoform OS=Bos taurus OX=9913 GN=AMELX PE=1 SV=2	1	hf1_10472_ebo_32_1_261219.ScanId;v=1;d1=18651.18651.3	controllerType=0 controllerNumber=1 scan=18651	39.5888
18827:2	1	S.M[+15.995]PLPPHPGHPGY[+15.995]INFS[+79.966].Y		M[+16], S[+80], Y[+16]	936.915	2	1872.82	1872.81	0	5.2	17	Non	305.76	305.76	1.1	5.53	1651	>sp|P02817|AMELX_BOVIN Amelogenin, X isoform OS=Bos taurus OX=9913 GN=AMELX PE=1 SV=2	1	hf1_10472_ebo_32_1_261219.ScanId;v=1;d1=14792.14792.2	controllerType=0 controllerNumber=1 scan=14792	32.9124
19277:2	1	S.M[+15.995]PLPPHPGHPGY[+15.995]INFS[+79.966].Y		M[+16], S[+80], Y[+16]	936.916	2	1872.83	1872.81	0	6	17	Non	318.49	318.49	0.77	5.58	1651	>sp|P02817|AMELX_BOVIN Amelogenin, X isoform OS=Bos taurus OX=9913 GN=AMELX PE=1 SV=2	1	hf1_10472_ebo_32_1_261219.ScanId;v=1;d1=15106.15106.2	controllerType=0 controllerNumber=1 scan=15106	33.4646
49966:3	1	S.MP[+15.995]LPPHPGHPGYIN[+0.984]FS[+79.966].Y		N[+1], P[+16], S[+80]	619.943	3	1857.82	1857.8	0	6.5	17	Non	321.21	299.42	5.8	5.48	1651	>sp|P02817|AMELX_BOVIN Amelogenin, X isoform OS=Bos taurus OX=9913 GN=AMELX PE=1 SV=2	1	hf1_10472_ebo_32_1_261219.ScanId;v=1;d1=36400.36400.3	controllerType=0 controllerNumber=1 scan=36400	73.4613
24088:3	1	S.MPLPPHPGHP[+15.995]GYIN[+0.984]FS[+79.966].Y		N[+1], P[+16], S[+80]	619.943	3	1857.81	1857.8	0	6.3	17	Non	377.29	296.59	5.41	5.48	1651	>sp|P02817|AMELX_BOVIN Amelogenin, X isoform OS=Bos taurus OX=9913 GN=AMELX PE=1 SV=2	1	hf1_10472_ebo_32_1_261219.ScanId;v=1;d1=18451.18451.3	controllerType=0 controllerNumber=1 scan=18451	39.2482
21893:3	1	S.M[+15.995]PLPPHPGHPGYIN[+0.984]FS[+79.966].Y		M[+16], N[+1], S[+80]	619.943	3	1857.81	1857.8	0	5.6	17	Non	385.86	385.86	6.52	6.74	1651	>sp|P02817|AMELX_BOVIN Amelogenin, X isoform OS=Bos taurus OX=9913 GN=AMELX PE=1 SV=2	1	hf1_10472_ebo_32_1_261219.ScanId;v=1;d1=16939.16939.3	controllerType=0 controllerNumber=1 scan=16939	36.6396
22478:3	1	S.M[+15.995]PLPPHPGHPGYIN[+0.984]FS[+79.966].Y		M[+16], N[+1], S[+80]	619.943	3	1857.81	1857.8	0	6.3	17	Non	440.8	368.18	2.67	6.88	1651	>sp|P02817|AMELX_BOVIN Amelogenin, X isoform OS=Bos taurus OX=9913 GN=AMELX PE=1 SV=2	1	hf1_10472_ebo_32_1_261219.ScanId;v=1;d1=17342.17342.3	controllerType=0 controllerNumber=1 scan=17342	37.3364
22767:3	1	S.MP[+15.995]LPPHPGHPGYIN[+0.984]FS[+79.966].Y		N[+1], P[+16], S[+80]	619.942	3	1857.81	1857.8	0	4	17	Non	442.47	368.86	12.14	6.6	1651	>sp|P02817|AMELX_BOVIN Amelogenin, X isoform OS=Bos taurus OX=9913 GN=AMELX PE=1 SV=2	1	hf1_10472_ebo_32_1_261219.ScanId;v=1;d1=17541.17541.3	controllerType=0 controllerNumber=1 scan=17541	37.6801
22181:3	1	S.MP[+15.995]LPPHPGHPGYIN[+0.984]FS[+79.966].Y		N[+1], P[+16], S[+80]	619.942	3	1857.81	1857.8	0	4.6	17	Non	468.69	405.34	2	6.6	1651	>sp|P02817|AMELX_BOVIN Amelogenin, X isoform OS=Bos taurus OX=9913 GN=AMELX PE=1 SV=2	1	hf1_10472_ebo_32_1_261219.ScanId;v=1;d1=17137.17137.3	controllerType=0 controllerNumber=1 scan=17137	36.9824
21600:3	1	S.M[+15.995]PLPPHPGHPGYIN[+0.984]FS[+79.966].Y		M[+16], N[+1], S[+80]	619.943	3	1857.81	1857.8	0	5.6	17	Non	487	448.47	13.73	7.32	1651	>sp|P02817|AMELX_BOVIN Amelogenin, X isoform OS=Bos taurus OX=9913 GN=AMELX PE=1 SV=2	1	hf1_10472_ebo_32_1_261219.ScanId;v=1;d1=16739.16739.3	controllerType=0 controllerNumber=1 scan=16739	36.2973
22501:2	1	S.M[+15.995]PLPPHPGHPGYIN[+0.984]FS[+79.966].Y		M[+16], N[+1], S[+80]	929.413	2	1857.82	1857.8	0	8.3	17	Non	516.37	417.72	11.39	6.86	1651	>sp|P02817|AMELX_BOVIN Amelogenin, X isoform OS=Bos taurus OX=9913 GN=AMELX PE=1 SV=2	1	hf1_10472_ebo_32_1_261219.ScanId;v=1;d1=17357.17357.2	controllerType=0 controllerNumber=1 scan=17357	37.3588
21909:2	1	S.M[+15.995]PLPPHPGHPGYIN[+0.984]FS[+79.966].Y		M[+16], N[+1], S[+80]	929.411	2	1857.81	1857.8	0	6.2	17	Non	539.94	467.97	27.24	7.23	1651	>sp|P02817|AMELX_BOVIN Amelogenin, X isoform OS=Bos taurus OX=9913 GN=AMELX PE=1 SV=2	1	hf1_10472_ebo_32_1_261219.ScanId;v=1;d1=16950.16950.2	controllerType=0 controllerNumber=1 scan=16950	36.6574
22205:2	1	S.M[+15.995]PLPPHPGHPGYIN[+0.984]FS[+79.966].Y		M[+16], N[+1], S[+80]	929.411	2	1857.81	1857.8	0	6	17	Non	559.49	481.67	30.31	7.23	1651	>sp|P02817|AMELX_BOVIN Amelogenin, X isoform OS=Bos taurus OX=9913 GN=AMELX PE=1 SV=2	1	hf1_10472_ebo_32_1_261219.ScanId;v=1;d1=17153.17153.2	controllerType=0 controllerNumber=1 scan=17153	37.0101
21610:2	1	S.M[+15.995]PLPPHPGHPGYIN[+0.984]FS[+79.966].Y		M[+16], N[+1], S[+80]	929.411	2	1857.81	1857.8	0	6.2	17	Non	615.32	517	44.45	9.46	1651	>sp|P02817|AMELX_BOVIN Amelogenin, X isoform OS=Bos taurus OX=9913 GN=AMELX PE=1 SV=2	1	hf1_10472_ebo_32_1_261219.ScanId;v=1;d1=16746.16746.2	controllerType=0 controllerNumber=1 scan=16746	36.309
22455:3	1	S.MPLPPHPGHPGYINFSY.E			641.979	3	1923.92	1923.92	0	0.4	17	Non	206.12	65.29	65.29	1.54	1651	>sp|P02817|AMELX_BOVIN Amelogenin, X isoform OS=Bos taurus OX=9913 GN=AMELX PE=1 SV=2	1	hf1_10472_ebo_32_1_261219.ScanId;v=1;d1=17326.17326.4	controllerType=0 controllerNumber=1 scan=17326	37.3074
24241:3	1	S.MPLPPHPGHPGYINFSY.E			641.982	3	1923.93	1923.92	0	5.6	17	Non	233.38	3.04	3.04	1.2	1651	>sp|P02817|AMELX_BOVIN Amelogenin, X isoform OS=Bos taurus OX=9913 GN=AMELX PE=1 SV=2	1	hf1_10472_ebo_32_1_261219.ScanId;v=1;d1=18548.18548.3	controllerType=0 controllerNumber=1 scan=18548	39.4109
27364:2	1	S.MPLPPHPGHPGYINFS[+79.966]Y.E		S[+80]	1002.45	2	2003.88	2003.89	0	-1.8	17	Non	262.04	262.04	113.13	4.04	1651	>sp|P02817|AMELX_BOVIN Amelogenin, X isoform OS=Bos taurus OX=9913 GN=AMELX PE=1 SV=2	1	hf1_10472_ebo_32_1_261219.ScanId;v=1;d1=20594.20594.2	controllerType=0 controllerNumber=1 scan=20594	42.898
26258:3	1	S.MPLPPHPGHPGYINFS[+79.966]Y.E		S[+80]	668.639	3	2003.9	2003.89	0	7.6	17	Non	281.55	115.01	115.01	3.1	1651	>sp|P02817|AMELX_BOVIN Amelogenin, X isoform OS=Bos taurus OX=9913 GN=AMELX PE=1 SV=2	1	hf1_10472_ebo_32_1_261219.ScanId;v=1;d1=19861.19861.3	controllerType=0 controllerNumber=1 scan=19861	41.658
26442:2	1	S.MPLPPHPGHPGYINFS[+79.966]Y.E		S[+80]	1002.45	2	2003.9	2003.89	0	5.8	17	Non	310.95	157.44	157.44	3.71	1651	>sp|P02817|AMELX_BOVIN Amelogenin, X isoform OS=Bos taurus OX=9913 GN=AMELX PE=1 SV=2	1	hf1_10472_ebo_32_1_261219.ScanId;v=1;d1=19979.19979.2	controllerType=0 controllerNumber=1 scan=19979	41.8563
26896:3	1	S.MPLPPHPGHPGYINFS[+79.966]Y.E		S[+80]	668.638	3	2003.9	2003.89	0	5.8	17	Non	372.2	203.93	203.93	5.31	1651	>sp|P02817|AMELX_BOVIN Amelogenin, X isoform OS=Bos taurus OX=9913 GN=AMELX PE=1 SV=2	1	hf1_10472_ebo_32_1_261219.ScanId;v=1;d1=20283.20283.3	controllerType=0 controllerNumber=1 scan=20283	42.369
26586:3	1	S.MPLPPHPGHPGYINFS[+79.966]Y.E		S[+80]	668.638	3	2003.9	2003.89	0	6.2	17	Non	422.82	237.45	237.45	5.6	1651	>sp|P02817|AMELX_BOVIN Amelogenin, X isoform OS=Bos taurus OX=9913 GN=AMELX PE=1 SV=2	1	hf1_10472_ebo_32_1_261219.ScanId;v=1;d1=20074.20074.3	controllerType=0 controllerNumber=1 scan=20074	42.0146
26533:2	1	S.MPLPPHPGHPGYINFS[+79.966]Y.E		S[+80]	1002.46	2	2003.91	2003.89	0	9.2	17	Non	467.04	287.99	271.46	5.56	1651	>sp|P02817|AMELX_BOVIN Amelogenin, X isoform OS=Bos taurus OX=9913 GN=AMELX PE=1 SV=2	1	hf1_10472_ebo_32_1_261219.ScanId;v=1;d1=20038.20038.2	controllerType=0 controllerNumber=1 scan=20038	41.9507
21031:3	1	S.MP[+15.995]LPPHPGHPGYINFSY[+15.995].E		P[+16], Y[+16]	652.636	3	1955.89	1955.91	0	-8.1	17	Non	178.63	178.63	4.36	2.29	1651	>sp|P02817|AMELX_BOVIN Amelogenin, X isoform OS=Bos taurus OX=9913 GN=AMELX PE=1 SV=2	1	hf1_10472_ebo_32_1_261219.ScanId;v=1;d1=16355.16355.3	controllerType=0 controllerNumber=1 scan=16355	35.6329
21871:3	1	S.MP[+15.995]LPPHPGHPGYIN[+0.984]FSY.E		N[+1], P[+16]	647.642	3	1940.91	1940.9	0	5.8	17	Non	205.89	26.97	9.1	2.3	1651	>sp|P02817|AMELX_BOVIN Amelogenin, X isoform OS=Bos taurus OX=9913 GN=AMELX PE=1 SV=2	1	hf1_10472_ebo_32_1_261219.ScanId;v=1;d1=16921.16921.3	controllerType=0 controllerNumber=1 scan=16921	36.6052
24318:2	1	S.M[+15.995]PLPPHPGHPGYINFS[+79.966]Y.E		M[+16], S[+80]	1010.45	2	2019.89	2019.88	0	4.2	17	Non	215.27	215.27	10.16	3.86	1651	>sp|P02817|AMELX_BOVIN Amelogenin, X isoform OS=Bos taurus OX=9913 GN=AMELX PE=1 SV=2	1	hf1_10472_ebo_32_1_261219.ScanId;v=1;d1=18598.18598.2	controllerType=0 controllerNumber=1 scan=18598	39.497
24010:2	1	S.M[+15.995]PLPPHPGHPGYINFS[+79.966]Y.E		M[+16], S[+80]	1010.45	2	2019.9	2019.88	0	7.5	17	Non	290.93	290.93	12.19	5.36	1651	>sp|P02817|AMELX_BOVIN Amelogenin, X isoform OS=Bos taurus OX=9913 GN=AMELX PE=1 SV=2	1	hf1_10472_ebo_32_1_261219.ScanId;v=1;d1=18397.18397.2	controllerType=0 controllerNumber=1 scan=18397	39.1529
24436:3	1	S.M[+15.995]PLPPHPGHPGYINFS[+79.966]Y.E		M[+16], S[+80]	673.965	3	2019.88	2019.88	0	-1.1	17	Non	321.68	176.61	3.33	4.12	1651	>sp|P02817|AMELX_BOVIN Amelogenin, X isoform OS=Bos taurus OX=9913 GN=AMELX PE=1 SV=2	1	hf1_10472_ebo_32_1_261219.ScanId;v=1;d1=18674.18674.3	controllerType=0 controllerNumber=1 scan=18674	39.6273
24125:3	1	S.M[+15.995]PLPPHPGHPGYINFS[+79.966]Y.E		M[+16], S[+80]	673.969	3	2019.89	2019.88	0	5.2	17	Non	331.07	111.98	3.19	3.4	1651	>sp|P02817|AMELX_BOVIN Amelogenin, X isoform OS=Bos taurus OX=9913 GN=AMELX PE=1 SV=2	1	hf1_10472_ebo_32_1_261219.ScanId;v=1;d1=18473.18473.3	controllerType=0 controllerNumber=1 scan=18473	39.2853
27384:3	1	S.MPLPPHPGHPGYIN[+0.984]FS[+79.966]Y.E		N[+1], S[+80]	668.965	3	2004.88	2004.87	0	5.1	17	Non	347.04	164.71	164.71	4.99	1651	>sp|P02817|AMELX_BOVIN Amelogenin, X isoform OS=Bos taurus OX=9913 GN=AMELX PE=1 SV=2	1	hf1_10472_ebo_32_1_261219.ScanId;v=1;d1=20607.20607.3	controllerType=0 controllerNumber=1 scan=20607	42.9199
23819:3	1	S.M[+15.995]PLPPHPGHPGYINFS[+79.966]Y.E		M[+16], S[+80]	673.969	3	2019.89	2019.88	0	5.4	17	Non	369.63	142.82	4.88	3.99	1651	>sp|P02817|AMELX_BOVIN Amelogenin, X isoform OS=Bos taurus OX=9913 GN=AMELX PE=1 SV=2	1	hf1_10472_ebo_32_1_261219.ScanId;v=1;d1=18269.18269.3	controllerType=0 controllerNumber=1 scan=18269	38.9336
23694:2	1	S.M[+15.995]PLPPHPGHPGYINFS[+79.966]Y.E		M[+16], S[+80]	1010.45	2	2019.89	2019.88	0	3.2	17	Non	376.14	376.14	19.74	6.41	1651	>sp|P02817|AMELX_BOVIN Amelogenin, X isoform OS=Bos taurus OX=9913 GN=AMELX PE=1 SV=2	1	hf1_10472_ebo_32_1_261219.ScanId;v=1;d1=18182.18182.2	controllerType=0 controllerNumber=1 scan=18182	38.7809
23402:2	1	S.M[+15.995]PLPPHPGHPGYINFS[+79.966]Y.E		M[+16], S[+80]	1010.45	2	2019.9	2019.88	0	9.5	17	Non	380.95	380.95	9.21	5.99	1651	>sp|P02817|AMELX_BOVIN Amelogenin, X isoform OS=Bos taurus OX=9913 GN=AMELX PE=1 SV=2	1	hf1_10472_ebo_32_1_261219.ScanId;v=1;d1=17981.17981.2	controllerType=0 controllerNumber=1 scan=17981	38.4311
23527:3	1	S.M[+15.995]PLPPHPGHPGYINFS[+79.966]Y.E		M[+16], S[+80]	673.969	3	2019.89	2019.88	0	5.4	17	Non	433.52	218.68	20.98	5.6	1651	>sp|P02817|AMELX_BOVIN Amelogenin, X isoform OS=Bos taurus OX=9913 GN=AMELX PE=1 SV=2	1	hf1_10472_ebo_32_1_261219.ScanId;v=1;d1=18066.18066.3	controllerType=0 controllerNumber=1 scan=18066	38.5822
25613:3	1	S.M[+15.995]PLPPHPGHPGYIN[+0.984]FS[+79.966]Y.E		M[+16], N[+1], S[+80]	674.298	3	2020.88	2020.87	0	6.7	17	Non	143.91	58.21	5.73	1.48	1651	>sp|P02817|AMELX_BOVIN Amelogenin, X isoform OS=Bos taurus OX=9913 GN=AMELX PE=1 SV=2	1	hf1_10472_ebo_32_1_261219.ScanId;v=1;d1=19427.19427.3	controllerType=0 controllerNumber=1 scan=19427	40.9152
25086:3	1	S.M[+15.995]PLPPHPGHPGYIN[+0.984]FS[+79.966]Y.E		M[+16], N[+1], S[+80]	674.298	3	2020.88	2020.87	0	6.1	17	Non	305.52	143.94	2.59	3.83	1651	>sp|P02817|AMELX_BOVIN Amelogenin, X isoform OS=Bos taurus OX=9913 GN=AMELX PE=1 SV=2	1	hf1_10472_ebo_32_1_261219.ScanId;v=1;d1=19084.19084.3	controllerType=0 controllerNumber=1 scan=19084	40.3333
24756:3	1	S.M[+15.995]PLPPHPGHPGYIN[+0.984]FS[+79.966]Y.E		M[+16], N[+1], S[+80]	674.299	3	2020.88	2020.87	0	8	17	Non	328.28	138.71	19.71	3.83	1651	>sp|P02817|AMELX_BOVIN Amelogenin, X isoform OS=Bos taurus OX=9913 GN=AMELX PE=1 SV=2	1	hf1_10472_ebo_32_1_261219.ScanId;v=1;d1=18874.18874.3	controllerType=0 controllerNumber=1 scan=18874	39.9729
24437:3	1	S.M[+15.995]PLPPHPGHPGYIN[+0.984]FS[+79.966]Y.E		M[+16], N[+1], S[+80]	674.299	3	2020.88	2020.87	0	7.3	17	Non	352.95	188.24	6.59	4.73	1651	>sp|P02817|AMELX_BOVIN Amelogenin, X isoform OS=Bos taurus OX=9913 GN=AMELX PE=1 SV=2	1	hf1_10472_ebo_32_1_261219.ScanId;v=1;d1=18674.18674.3	controllerType=0 controllerNumber=1 scan=18674	39.6273
20575:3	1	S.MP[+15.995]LPPHPGHPGYINFSYE.V		P[+16]	690.328	3	2068.97	2068.96	0	5.1	17	Non	216.46	216.46	5.8	3.54	1651	>sp|P02817|AMELX_BOVIN Amelogenin, X isoform OS=Bos taurus OX=9913 GN=AMELX PE=1 SV=2	1	hf1_10472_ebo_32_1_261219.ScanId;v=1;d1=16036.16036.3	controllerType=0 controllerNumber=1 scan=16036	35.0762
20463:3	1	S.MP[+15.995]LPPHPGHPGYINFSYE.V		P[+16]	690.329	3	2068.97	2068.96	0	6.9	17	Non	233.64	233.64	5.8	3.54	1651	>sp|P02817|AMELX_BOVIN Amelogenin, X isoform OS=Bos taurus OX=9913 GN=AMELX PE=1 SV=2	1	hf1_10472_ebo_32_1_261219.ScanId;v=1;d1=15954.15954.3	controllerType=0 controllerNumber=1 scan=15954	34.935
25974:2	1	S.MPLPPHPGHPGYINFS[+79.966]YE.V		S[+80]	1066.98	2	2132.95	2132.93	0	7.6	17	Non	251.71	251.71	126.61	3.93	1651	>sp|P02817|AMELX_BOVIN Amelogenin, X isoform OS=Bos taurus OX=9913 GN=AMELX PE=1 SV=2	1	hf1_10472_ebo_32_1_261219.ScanId;v=1;d1=19670.19670.2	controllerType=0 controllerNumber=1 scan=19670	41.3313
25316:3	1	S.MPLPPHPGHPGYINFS[+79.966]YE.V		S[+80]	711.653	3	2132.94	2132.93	0	6.7	17	Non	316.86	316.86	205.46	5.31	1651	>sp|P02817|AMELX_BOVIN Amelogenin, X isoform OS=Bos taurus OX=9913 GN=AMELX PE=1 SV=2	1	hf1_10472_ebo_32_1_261219.ScanId;v=1;d1=19235.19235.3	controllerType=0 controllerNumber=1 scan=19235	40.5895
26065:3	1	S.MPLPPHPGHPGYINFS[+79.966]YE.V		S[+80]	711.654	3	2132.95	2132.93	0	7.6	17	Non	334.11	334.11	192.37	5.43	1651	>sp|P02817|AMELX_BOVIN Amelogenin, X isoform OS=Bos taurus OX=9913 GN=AMELX PE=1 SV=2	1	hf1_10472_ebo_32_1_261219.ScanId;v=1;d1=19730.19730.3	controllerType=0 controllerNumber=1 scan=19730	41.4353
25633:3	1	S.MPLPPHPGHPGYINFS[+79.966]YE.V		S[+80]	711.653	3	2132.94	2132.93	0	6.1	17	Non	371.77	371.77	244.01	6.47	1651	>sp|P02817|AMELX_BOVIN Amelogenin, X isoform OS=Bos taurus OX=9913 GN=AMELX PE=1 SV=2	1	hf1_10472_ebo_32_1_261219.ScanId;v=1;d1=19441.19441.3	controllerType=0 controllerNumber=1 scan=19441	40.9411
25429:2	1	S.MPLPPHPGHPGYINFS[+79.966]YE.V		S[+80]	1066.98	2	2132.94	2132.93	0	6.2	17	Non	396.26	396.26	264.68	6.96	1651	>sp|P02817|AMELX_BOVIN Amelogenin, X isoform OS=Bos taurus OX=9913 GN=AMELX PE=1 SV=2	1	hf1_10472_ebo_32_1_261219.ScanId;v=1;d1=19309.19309.2	controllerType=0 controllerNumber=1 scan=19309	40.7164
22177:3	1	S.M[+15.995]PLPPHPGHPGYINFS[+79.966]YE.V		M[+16], S[+80]	716.985	3	2148.94	2148.92	0	6.9	17	Non	266.77	266.77	18.11	5.09	1651	>sp|P02817|AMELX_BOVIN Amelogenin, X isoform OS=Bos taurus OX=9913 GN=AMELX PE=1 SV=2	1	hf1_10472_ebo_32_1_261219.ScanId;v=1;d1=17134.17134.3	controllerType=0 controllerNumber=1 scan=17134	36.976
23693:3	1	S.M[+15.995]PLPPHPGHPGYINFS[+79.966]YE.V		M[+16], S[+80]	716.978	3	2148.92	2148.92	0	-2.9	17	Non	283.72	283.72	1.02	4.5	1651	>sp|P02817|AMELX_BOVIN Amelogenin, X isoform OS=Bos taurus OX=9913 GN=AMELX PE=1 SV=2	1	hf1_10472_ebo_32_1_261219.ScanId;v=1;d1=18181.18181.3	controllerType=0 controllerNumber=1 scan=18181	38.7794
26228:2	1	S.MPLPPHPGHPGYIN[+0.984]FS[+79.966]YE.V		N[+1], S[+80]	1067.47	2	2133.93	2133.91	0	7.1	17	Non	322.91	322.91	235.43	5.6	1651	>sp|P02817|AMELX_BOVIN Amelogenin, X isoform OS=Bos taurus OX=9913 GN=AMELX PE=1 SV=2	1	hf1_10472_ebo_32_1_261219.ScanId;v=1;d1=19841.19841.2	controllerType=0 controllerNumber=1 scan=19841	41.6239
22948:3	1	S.M[+15.995]PLPPHPGHPGYINFS[+79.966]YE.V		M[+16], S[+80]	716.985	3	2148.94	2148.92	0	6.5	17	Non	370.82	370.82	1.97	6.47	1651	>sp|P02817|AMELX_BOVIN Amelogenin, X isoform OS=Bos taurus OX=9913 GN=AMELX PE=1 SV=2	1	hf1_10472_ebo_32_1_261219.ScanId;v=1;d1=17668.17668.3	controllerType=0 controllerNumber=1 scan=17668	37.8935
22640:3	1	S.M[+15.995]PLPPHPGHPGYINFS[+79.966]YE.V		M[+16], S[+80]	716.984	3	2148.94	2148.92	0	6.1	17	Non	449.87	449.87	27.06	6.82	1651	>sp|P02817|AMELX_BOVIN Amelogenin, X isoform OS=Bos taurus OX=9913 GN=AMELX PE=1 SV=2	1	hf1_10472_ebo_32_1_261219.ScanId;v=1;d1=17459.17459.3	controllerType=0 controllerNumber=1 scan=17459	37.5386
23456:2	1	S.M[+15.995]PLPPHPGHPGYIN[+0.984]FS[+79.966]YE.V		M[+16], N[+1], S[+80]	1075.47	2	2149.93	2149.91	0	8	17	Non	155.64	155.64	3.52	2.53	1651	>sp|P02817|AMELX_BOVIN Amelogenin, X isoform OS=Bos taurus OX=9913 GN=AMELX PE=1 SV=2	1	hf1_10472_ebo_32_1_261219.ScanId;v=1;d1=18016.18016.2	controllerType=0 controllerNumber=1 scan=18016	38.4932
23994:3	1	S.MP[+15.995]LPPHPGHPGYIN[+0.984]FS[+79.966]YE.V		N[+1], P[+16], S[+80]	717.313	3	2149.92	2149.91	0	7.2	17	Non	208.45	208.45	5.8	3.34	1651	>sp|P02817|AMELX_BOVIN Amelogenin, X isoform OS=Bos taurus OX=9913 GN=AMELX PE=1 SV=2	1	hf1_10472_ebo_32_1_261219.ScanId;v=1;d1=18386.18386.3	controllerType=0 controllerNumber=1 scan=18386	39.1343
23770:2	1	S.M[+15.995]PLPPHPGHPGYIN[+0.984]FS[+79.966]YE.V		M[+16], N[+1], S[+80]	1075.47	2	2149.92	2149.91	0	7.4	17	Non	238.75	221.93	23.44	3.92	1651	>sp|P02817|AMELX_BOVIN Amelogenin, X isoform OS=Bos taurus OX=9913 GN=AMELX PE=1 SV=2	1	hf1_10472_ebo_32_1_261219.ScanId;v=1;d1=18234.18234.2	controllerType=0 controllerNumber=1 scan=18234	38.8718
23552:3	1	S.M[+15.995]PLPPHPGHPGYIN[+0.984]FS[+79.966]YE.V		M[+16], N[+1], S[+80]	717.312	3	2149.92	2149.91	0	6	17	Non	306.59	306.59	23.37	5.31	1651	>sp|P02817|AMELX_BOVIN Amelogenin, X isoform OS=Bos taurus OX=9913 GN=AMELX PE=1 SV=2	1	hf1_10472_ebo_32_1_261219.ScanId;v=1;d1=18081.18081.4	controllerType=0 controllerNumber=1 scan=18081	38.6065
23236:3	1	S.M[+15.995]PLPPHPGHPGYIN[+0.984]FS[+79.966]YE.V		M[+16], N[+1], S[+80]	717.312	3	2149.92	2149.91	0	6.1	17	Non	326.8	326.8	13.09	5.64	1651	>sp|P02817|AMELX_BOVIN Amelogenin, X isoform OS=Bos taurus OX=9913 GN=AMELX PE=1 SV=2	1	hf1_10472_ebo_32_1_261219.ScanId;v=1;d1=17873.17873.3	controllerType=0 controllerNumber=1 scan=17873	38.2514
29917:3	1	S.MPLPPHPGHPGYINFSYEVL.T			755.707	3	2265.11	2265.12	0	-4	17	Non	253.16	224.9	224.9	3.87	1651	>sp|P02817|AMELX_BOVIN Amelogenin, X isoform OS=Bos taurus OX=9913 GN=AMELX PE=1 SV=2	1	hf1_10472_ebo_32_1_261219.ScanId;v=1;d1=22300.22300.3	controllerType=0 controllerNumber=1 scan=22300	45.8115
27166:3	1	S.MP[+15.995]LPPHPGHPGYINFSYEVL.T		P[+16]	761.046	3	2281.12	2281.11	0	5.9	17	Non	234.36	216.01	5.45	3.51	1651	>sp|P02817|AMELX_BOVIN Amelogenin, X isoform OS=Bos taurus OX=9913 GN=AMELX PE=1 SV=2	1	hf1_10472_ebo_32_1_261219.ScanId;v=1;d1=20462.20462.3	controllerType=0 controllerNumber=1 scan=20462	42.6736
27892:3	1	S.MP[+15.995]LPPHPGHPGYINFSYEVL.T		P[+16]	761.041	3	2281.11	2281.11	0	-1.6	17	Non	235.54	214.9	5.8	2.77	1651	>sp|P02817|AMELX_BOVIN Amelogenin, X isoform OS=Bos taurus OX=9913 GN=AMELX PE=1 SV=2	1	hf1_10472_ebo_32_1_261219.ScanId;v=1;d1=20949.20949.3	controllerType=0 controllerNumber=1 scan=20949	43.4947
30345:3	1	S.MPLPPHPGHPGYIN[+0.984]FSYEVL.T		N[+1]	756.039	3	2266.1	2266.1	0	1.5	17	Non	260.75	239.9	239.9	3.25	1651	>sp|P02817|AMELX_BOVIN Amelogenin, X isoform OS=Bos taurus OX=9913 GN=AMELX PE=1 SV=2	1	hf1_10472_ebo_32_1_261219.ScanId;v=1;d1=22580.22580.6	controllerType=0 controllerNumber=1 scan=22580	46.2951
30980:2	1	S.MPLPPHPGHPGYINFS[+79.966]YEVL.T		S[+80]	1173.05	2	2345.1	2345.08	0	5.8	17	Non	319.06	319.06	127.44	5.54	1651	>sp|P02817|AMELX_BOVIN Amelogenin, X isoform OS=Bos taurus OX=9913 GN=AMELX PE=1 SV=2	1	hf1_10472_ebo_32_1_261219.ScanId;v=1;d1=23000.23000.2	controllerType=0 controllerNumber=1 scan=23000	47.0186
31549:3	1	S.MPLPPHPGHPGYINFS[+79.966]YEVL.T		S[+80]	782.37	3	2345.1	2345.08	0	6.2	17	Non	323.7	323.7	124.39	5.61	1651	>sp|P02817|AMELX_BOVIN Amelogenin, X isoform OS=Bos taurus OX=9913 GN=AMELX PE=1 SV=2	1	hf1_10472_ebo_32_1_261219.ScanId;v=1;d1=23367.23367.3	controllerType=0 controllerNumber=1 scan=23367	47.6587
31239:3	1	S.MPLPPHPGHPGYINFS[+79.966]YEVL.T		S[+80]	782.37	3	2345.1	2345.08	0	5.6	17	Non	330.23	330.23	113.01	5.61	1651	>sp|P02817|AMELX_BOVIN Amelogenin, X isoform OS=Bos taurus OX=9913 GN=AMELX PE=1 SV=2	1	hf1_10472_ebo_32_1_261219.ScanId;v=1;d1=23169.23169.3	controllerType=0 controllerNumber=1 scan=23169	47.3147
30921:3	1	S.MPLPPHPGHPGYINFS[+79.966]YEVL.T		S[+80]	782.369	3	2345.09	2345.08	0	4.6	17	Non	340.83	340.83	145.97	5.33	1651	>sp|P02817|AMELX_BOVIN Amelogenin, X isoform OS=Bos taurus OX=9913 GN=AMELX PE=1 SV=2	1	hf1_10472_ebo_32_1_261219.ScanId;v=1;d1=22964.22964.3	controllerType=0 controllerNumber=1 scan=22964	46.9565
29543:2	1	S.M[+15.995]PLPPHPGHPGYINFS[+79.966]YEVL.T		M[+16], S[+80]	1181.05	2	2361.1	2361.08	0	9.8	17	Non	122.59	122.59	0.52	1.48	1651	>sp|P02817|AMELX_BOVIN Amelogenin, X isoform OS=Bos taurus OX=9913 GN=AMELX PE=1 SV=2	1	hf1_10472_ebo_32_1_261219.ScanId;v=1;d1=22049.22049.2	controllerType=0 controllerNumber=1 scan=22049	45.3782
28101:3	1	S.MP[+15.995]LPPHPGHPGYIN[+0.984]FSYEVL.T		N[+1], P[+16]	761.373	3	2282.11	2282.1	0	4.7	17	Non	191.58	191.58	5.8	2.6	1651	>sp|P02817|AMELX_BOVIN Amelogenin, X isoform OS=Bos taurus OX=9913 GN=AMELX PE=1 SV=2	1	hf1_10472_ebo_32_1_261219.ScanId;v=1;d1=21091.21091.3	controllerType=0 controllerNumber=1 scan=21091	43.7348
30536:3	1	S.MP[+15.995]LPPHPGHPGYINFS[+79.966]YEVL.T		P[+16], S[+80]	787.697	3	2361.08	2361.08	0	0.1	17	Non	213.23	213.23	5.8	2.44	1651	>sp|P02817|AMELX_BOVIN Amelogenin, X isoform OS=Bos taurus OX=9913 GN=AMELX PE=1 SV=2	1	hf1_10472_ebo_32_1_261219.ScanId;v=1;d1=22708.22708.3	controllerType=0 controllerNumber=1 scan=22708	46.5185
28900:3	1	S.MP[+15.995]LPPHPGHPGYINFS[+79.966]YEVL.T		P[+16], S[+80]	787.702	3	2361.09	2361.08	0	6	17	Non	219.43	219.43	7.3	3.51	1651	>sp|P02817|AMELX_BOVIN Amelogenin, X isoform OS=Bos taurus OX=9913 GN=AMELX PE=1 SV=2	1	hf1_10472_ebo_32_1_261219.ScanId;v=1;d1=21627.21627.5	controllerType=0 controllerNumber=1 scan=21627	44.6548
31854:3	1	S.MPLPPHPGHPGYIN[+0.984]FS[+79.966]YEVL.T		N[+1], S[+80]	782.699	3	2346.08	2346.07	0	7	17	Non	248	248	68.6	4.46	1651	>sp|P02817|AMELX_BOVIN Amelogenin, X isoform OS=Bos taurus OX=9913 GN=AMELX PE=1 SV=2	1	hf1_10472_ebo_32_1_261219.ScanId;v=1;d1=23567.23567.3	controllerType=0 controllerNumber=1 scan=23567	48.0044
32403:3	1	S.MPLPPHPGHPGYIN[+0.984]FS[+79.966]YEVL.T		N[+1], S[+80]	782.699	3	2346.08	2346.07	0	6.3	17	Non	262.28	262.28	40.86	4.67	1651	>sp|P02817|AMELX_BOVIN Amelogenin, X isoform OS=Bos taurus OX=9913 GN=AMELX PE=1 SV=2	1	hf1_10472_ebo_32_1_261219.ScanId;v=1;d1=23921.23921.3	controllerType=0 controllerNumber=1 scan=23921	48.6232
29359:3	1	S.MP[+15.995]LPPHPGHPGYINFS[+79.966]YEVL.T		P[+16], S[+80]	787.702	3	2361.09	2361.08	0	5.3	17	Non	268.71	268.71	0.94	5.06	1651	>sp|P02817|AMELX_BOVIN Amelogenin, X isoform OS=Bos taurus OX=9913 GN=AMELX PE=1 SV=2	1	hf1_10472_ebo_32_1_261219.ScanId;v=1;d1=21927.21927.3	controllerType=0 controllerNumber=1 scan=21927	45.1676
29047:3	1	S.MP[+15.995]LPPHPGHPGYINFS[+79.966]YEVL.T		P[+16], S[+80]	787.702	3	2361.09	2361.08	0	6.3	17	Non	279.18	279.18	5.8	4.67	1651	>sp|P02817|AMELX_BOVIN Amelogenin, X isoform OS=Bos taurus OX=9913 GN=AMELX PE=1 SV=2	1	hf1_10472_ebo_32_1_261219.ScanId;v=1;d1=21722.21722.3	controllerType=0 controllerNumber=1 scan=21722	44.8178
32145:2	1	S.MPLPPHPGHPGYIN[+0.984]FS[+79.966]YEVL.T		N[+1], S[+80]	1173.55	2	2346.09	2346.07	0	8.6	17	Non	345.22	345.22	156.97	5.61	1651	>sp|P02817|AMELX_BOVIN Amelogenin, X isoform OS=Bos taurus OX=9913 GN=AMELX PE=1 SV=2	1	hf1_10472_ebo_32_1_261219.ScanId;v=1;d1=23753.23753.2	controllerType=0 controllerNumber=1 scan=23753	48.3303
29241:2	1	S.M[+15.995]PLPPHPGHPGYINFS[+79.966]YEVL.T		M[+16], S[+80]	1181.05	2	2361.09	2361.08	0	6.4	17	Non	489.86	489.86	15.68	6.99	1651	>sp|P02817|AMELX_BOVIN Amelogenin, X isoform OS=Bos taurus OX=9913 GN=AMELX PE=1 SV=2	1	hf1_10472_ebo_32_1_261219.ScanId;v=1;d1=21849.21849.2	controllerType=0 controllerNumber=1 scan=21849	45.0352
30232:3	1	S.MP[+15.995]LPPHPGHPGYIN[+0.984]FS[+79.966]YEVL.T		N[+1], P[+16], S[+80]	788.029	3	2362.07	2362.06	0	5.3	17	Non	223.97	223.97	5.8	2.84	1651	>sp|P02817|AMELX_BOVIN Amelogenin, X isoform OS=Bos taurus OX=9913 GN=AMELX PE=1 SV=2	1	hf1_10472_ebo_32_1_261219.ScanId;v=1;d1=22509.22509.3	controllerType=0 controllerNumber=1 scan=22509	46.1724
29922:3	1	S.MP[+15.995]LPPHPGHPGYIN[+0.984]FS[+79.966]YEVL.T		N[+1], P[+16], S[+80]	788.03	3	2362.08	2362.06	0	6.6	17	Non	226.26	226.26	5.8	3.51	1651	>sp|P02817|AMELX_BOVIN Amelogenin, X isoform OS=Bos taurus OX=9913 GN=AMELX PE=1 SV=2	1	hf1_10472_ebo_32_1_261219.ScanId;v=1;d1=22304.22304.3	controllerType=0 controllerNumber=1 scan=22304	45.8171
30164:2	1	S.MP[+15.995]LPPHPGHPGYIN[+0.984]FS[+79.966]YEVL.T		N[+1], P[+16], S[+80]	1181.54	2	2362.08	2362.06	0	7.6	17	Non	352.42	352.42	14.29	5.61	1651	>sp|P02817|AMELX_BOVIN Amelogenin, X isoform OS=Bos taurus OX=9913 GN=AMELX PE=1 SV=2	1	hf1_10472_ebo_32_1_261219.ScanId;v=1;d1=22465.22465.2	controllerType=0 controllerNumber=1 scan=22465	46.0964
29855:2	1	S.M[+15.995]PLPPHPGHPGYIN[+0.984]FS[+79.966]YEVL.T		M[+16], N[+1], S[+80]	1181.55	2	2362.08	2362.06	0	9.8	17	Non	419.67	409.5	0.8	5.93	1651	>sp|P02817|AMELX_BOVIN Amelogenin, X isoform OS=Bos taurus OX=9913 GN=AMELX PE=1 SV=2	1	hf1_10472_ebo_32_1_261219.ScanId;v=1;d1=22258.22258.2	controllerType=0 controllerNumber=1 scan=22258	45.7383
30949:3	1	S.MPLPPHPGHPGYINFS[+79.966]YEVLTP.L		S[+80]	848.404	3	2543.2	2543.18	0	5.9	17	Non	278.08	278.08	82.75	5.06	1651	>sp|P02817|AMELX_BOVIN Amelogenin, X isoform OS=Bos taurus OX=9913 GN=AMELX PE=1 SV=2	1	hf1_10472_ebo_32_1_261219.ScanId;v=1;d1=22982.22982.3	controllerType=0 controllerNumber=1 scan=22982	46.9886
31885:3	1	S.MPLPPHPGHPGYINFS[+79.966]YEVLTP.L		S[+80]	848.401	3	2543.19	2543.18	0	2.6	17	Non	283.91	283.91	92.11	4.66	1651	>sp|P02817|AMELX_BOVIN Amelogenin, X isoform OS=Bos taurus OX=9913 GN=AMELX PE=1 SV=2	1	hf1_10472_ebo_32_1_261219.ScanId;v=1;d1=23587.23587.3	controllerType=0 controllerNumber=1 scan=23587	48.0401
31255:3	1	S.MPLPPHPGHPGYINFS[+79.966]YEVLTP.L		S[+80]	848.405	3	2543.2	2543.18	0	6.4	17	Non	336.78	336.78	74.01	5.61	1651	>sp|P02817|AMELX_BOVIN Amelogenin, X isoform OS=Bos taurus OX=9913 GN=AMELX PE=1 SV=2	1	hf1_10472_ebo_32_1_261219.ScanId;v=1;d1=23181.23181.3	controllerType=0 controllerNumber=1 scan=23181	47.3349
24261:4	1	S.MPLPPHPGHPGYIN[+0.984]F[+31.990]SYEVLTP.L		F[+32], N[+1]	624.803	4	2496.19	2496.19	0	0.8	17	Non	200.99	144.82	0	0.82	1651	>sp|P02817|AMELX_BOVIN Amelogenin, X isoform OS=Bos taurus OX=9913 GN=AMELX PE=1 SV=2	1	hf1_10472_ebo_32_1_261219.ScanId;v=1;d1=18560.18560.3	controllerType=0 controllerNumber=1 scan=18560	39.4317
31886:3	1	S.MPLPPHPGHPGYIN[+0.984]FS[+79.966]YEVLTP.L		N[+1], S[+80]	848.734	3	2544.19	2544.17	0	7.5	17	Non	282.34	282.34	116.13	4.73	1651	>sp|P02817|AMELX_BOVIN Amelogenin, X isoform OS=Bos taurus OX=9913 GN=AMELX PE=1 SV=2	1	hf1_10472_ebo_32_1_261219.ScanId;v=1;d1=23587.23587.3	controllerType=0 controllerNumber=1 scan=23587	48.0401
29799:3	1	S.MP[+15.995]LPPHPGHPGYIN[+0.984]FS[+79.966]YEVLTP.L		N[+1], P[+16], S[+80]	854.064	3	2560.18	2560.16	0	6.5	17	Non	300.75	279.55	10.61	4.73	1651	>sp|P02817|AMELX_BOVIN Amelogenin, X isoform OS=Bos taurus OX=9913 GN=AMELX PE=1 SV=2	1	hf1_10472_ebo_32_1_261219.ScanId;v=1;d1=22219.22219.3	controllerType=0 controllerNumber=1 scan=22219	45.6685
49842:3	1	S.MPLPPHPGHPGYINFS[+79.966]YEVLTPL.K		S[+80]	886.098	3	2656.28	2656.27	0	4.8	17	Non	139.81	139.81	13.87	2.73	1651	>sp|P02817|AMELX_BOVIN Amelogenin, X isoform OS=Bos taurus OX=9913 GN=AMELX PE=1 SV=2	1	hf1_10472_ebo_32_1_261219.ScanId;v=1;d1=36306.36306.3	controllerType=0 controllerNumber=1 scan=36306	73.2684
34674:4	1	S.MPLPPHPGHPGYINFS[+79.966]YEVLTPL.K		S[+80]	664.826	4	2656.28	2656.27	0	6.2	17	Non	202.24	202.24	84.61	2.73	1651	>sp|P02817|AMELX_BOVIN Amelogenin, X isoform OS=Bos taurus OX=9913 GN=AMELX PE=1 SV=2	1	hf1_10472_ebo_32_1_261219.ScanId;v=1;d1=25424.25424.4	controllerType=0 controllerNumber=1 scan=25424	51.2477
36380:3	1	S.MPLPPHPGHPGYINFS[+79.966]YEVLTPL.K		S[+80]	886.095	3	2656.27	2656.27	0	1.3	17	Non	238.09	238.09	37.9	2.87	1651	>sp|P02817|AMELX_BOVIN Amelogenin, X isoform OS=Bos taurus OX=9913 GN=AMELX PE=1 SV=2	1	hf1_10472_ebo_32_1_261219.ScanId;v=1;d1=26567.26567.3	controllerType=0 controllerNumber=1 scan=26567	53.2671
30553:3	1	S.MP[+15.995]LPPHPGHPGYINFSYEVLTPL.K		P[+16]	864.775	3	2592.31	2592.3	0	5.7	17	Non	246.45	188.66	5.8	4.36	1651	>sp|P02817|AMELX_BOVIN Amelogenin, X isoform OS=Bos taurus OX=9913 GN=AMELX PE=1 SV=2	1	hf1_10472_ebo_32_1_261219.ScanId;v=1;d1=22719.22719.5	controllerType=0 controllerNumber=1 scan=22719	46.5376
35623:2	1	S.MPLPPHPGHPGYINFS[+79.966]YEVLTPL.K		S[+80]	1328.64	2	2656.27	2656.27	0	1.1	17	Non	285.6	285.6	70.24	4.42	1651	>sp|P02817|AMELX_BOVIN Amelogenin, X isoform OS=Bos taurus OX=9913 GN=AMELX PE=1 SV=2	1	hf1_10472_ebo_32_1_261219.ScanId;v=1;d1=26062.26062.2	controllerType=0 controllerNumber=1 scan=26062	52.3722
34285:3	1	S.MPLPPHPGHPGYINFS[+79.966]YEVLTPL.K		S[+80]	886.099	3	2656.28	2656.27	0	5.9	17	Non	336.75	336.75	78.32	5.61	1651	>sp|P02817|AMELX_BOVIN Amelogenin, X isoform OS=Bos taurus OX=9913 GN=AMELX PE=1 SV=2	1	hf1_10472_ebo_32_1_261219.ScanId;v=1;d1=25165.25165.3	controllerType=0 controllerNumber=1 scan=25165	50.7897
34885:3	1	S.MPLPPHPGHPGYINFS[+79.966]YEVLTPL.K		S[+80]	886.098	3	2656.28	2656.27	0	4.3	17	Non	360.54	360.54	90.44	6.16	1651	>sp|P02817|AMELX_BOVIN Amelogenin, X isoform OS=Bos taurus OX=9913 GN=AMELX PE=1 SV=2	1	hf1_10472_ebo_32_1_261219.ScanId;v=1;d1=25566.25566.3	controllerType=0 controllerNumber=1 scan=25566	51.4983
34375:2	1	S.MPLPPHPGHPGYINFS[+79.966]YEVLTPL.K		S[+80]	1328.64	2	2656.28	2656.27	0	5	17	Non	362.63	362.63	85.6	6.66	1651	>sp|P02817|AMELX_BOVIN Amelogenin, X isoform OS=Bos taurus OX=9913 GN=AMELX PE=1 SV=2	1	hf1_10472_ebo_32_1_261219.ScanId;v=1;d1=25225.25225.2	controllerType=0 controllerNumber=1 scan=25225	50.8925
34976:2	1	S.MPLPPHPGHPGYINFS[+79.966]YEVLTPL.K		S[+80]	1328.65	2	2656.29	2656.27	0	8	17	Non	383.87	383.87	104.65	6.49	1651	>sp|P02817|AMELX_BOVIN Amelogenin, X isoform OS=Bos taurus OX=9913 GN=AMELX PE=1 SV=2	1	hf1_10472_ebo_32_1_261219.ScanId;v=1;d1=25623.25623.2	controllerType=0 controllerNumber=1 scan=25623	51.5953
30801:3	1	S.MP[+15.995]LPPHPGHPGYINFSYEVLTPL.K		P[+16]	864.774	3	2592.31	2592.3	0	5	17	Non	389.96	370.85	5.8	6.44	1651	>sp|P02817|AMELX_BOVIN Amelogenin, X isoform OS=Bos taurus OX=9913 GN=AMELX PE=1 SV=2	1	hf1_10472_ebo_32_1_261219.ScanId;v=1;d1=22884.22884.3	controllerType=0 controllerNumber=1 scan=22884	46.8205
31109:3	1	S.MP[+15.995]LPPHPGHPGYINFSYEVLTPL.K		P[+16]	864.772	3	2592.3	2592.3	0	1.8	17	Non	423.08	342.51	5.8	4.85	1651	>sp|P02817|AMELX_BOVIN Amelogenin, X isoform OS=Bos taurus OX=9913 GN=AMELX PE=1 SV=2	1	hf1_10472_ebo_32_1_261219.ScanId;v=1;d1=23083.23083.3	controllerType=0 controllerNumber=1 scan=23083	47.1648
34664:2	1	S.MPLPPHPGHPGYINFS[+79.966]YEVLTPL.K		S[+80]	1328.65	2	2656.29	2656.27	0	9	17	Non	427.92	427.92	124.79	6.46	1651	>sp|P02817|AMELX_BOVIN Amelogenin, X isoform OS=Bos taurus OX=9913 GN=AMELX PE=1 SV=2	1	hf1_10472_ebo_32_1_261219.ScanId;v=1;d1=25418.25418.2	controllerType=0 controllerNumber=1 scan=25418	51.2386
34586:3	1	S.MPLPPHPGHPGYINFS[+79.966]YEVLTPL.K		S[+80]	886.1	3	2656.28	2656.27	0	6.6	17	Non	440.77	440.77	106.66	6.79	1651	>sp|P02817|AMELX_BOVIN Amelogenin, X isoform OS=Bos taurus OX=9913 GN=AMELX PE=1 SV=2	1	hf1_10472_ebo_32_1_261219.ScanId;v=1;d1=25367.25367.3	controllerType=0 controllerNumber=1 scan=25367	51.1456
35219:3	1	S.MP[+15.995]LPPHPGHPGYINFS[+79.966]YEVLTPL.K		P[+16], S[+80]	891.429	3	2672.27	2672.26	0	4.2	17	Non	200.38	200.38	5.8	2.47	1651	>sp|P02817|AMELX_BOVIN Amelogenin, X isoform OS=Bos taurus OX=9913 GN=AMELX PE=1 SV=2	1	hf1_10472_ebo_32_1_261219.ScanId;v=1;d1=25789.25789.3	controllerType=0 controllerNumber=1 scan=25789	51.8909
32609:4	1	S.MP[+15.995]LPPHPGHPGYINFS[+79.966]YEVLTPL.K		P[+16], S[+80]	668.825	4	2672.28	2672.26	0	6.1	17	Non	204.7	204.7	5.8	2.73	1651	>sp|P02817|AMELX_BOVIN Amelogenin, X isoform OS=Bos taurus OX=9913 GN=AMELX PE=1 SV=2	1	hf1_10472_ebo_32_1_261219.ScanId;v=1;d1=24057.24057.4	controllerType=0 controllerNumber=1 scan=24057	48.8591
32917:4	1	S.MP[+15.995]LPPHPGHPGYINFS[+79.966]YEVLTPL.K		P[+16], S[+80]	668.825	4	2672.28	2672.26	0	5.7	17	Non	214.22	214.22	5.8	2.73	1651	>sp|P02817|AMELX_BOVIN Amelogenin, X isoform OS=Bos taurus OX=9913 GN=AMELX PE=1 SV=2	1	hf1_10472_ebo_32_1_261219.ScanId;v=1;d1=24257.24257.4	controllerType=0 controllerNumber=1 scan=24257	49.2092
31895:3	1	S.M[+15.995]PLPPHPGHPGYINFS[+79.966]YEVLTPL.K		M[+16], S[+80]	891.433	3	2672.29	2672.26	0	9	17	Non	230.94	230.94	17.95	3.31	1651	>sp|P02817|AMELX_BOVIN Amelogenin, X isoform OS=Bos taurus OX=9913 GN=AMELX PE=1 SV=2	1	hf1_10472_ebo_32_1_261219.ScanId;v=1;d1=23594.23594.3	controllerType=0 controllerNumber=1 scan=23594	48.0507
33421:3	1	S.MP[+15.995]LPPHPGHPGYINFS[+79.966]YEVLTPL.K		P[+16], S[+80]	891.427	3	2672.27	2672.26	0	2.2	17	Non	261.86	261.86	4	4.33	1651	>sp|P02817|AMELX_BOVIN Amelogenin, X isoform OS=Bos taurus OX=9913 GN=AMELX PE=1 SV=2	1	hf1_10472_ebo_32_1_261219.ScanId;v=1;d1=24583.24583.3	controllerType=0 controllerNumber=1 scan=24583	49.7785
50003:3	1	S.MP[+15.995]LPPHPGHPGYINFS[+79.966]YEVLTPL.K		P[+16], S[+80]	891.433	3	2672.28	2672.26	0	8.3	17	Non	263.43	263.43	5.8	4.84	1651	>sp|P02817|AMELX_BOVIN Amelogenin, X isoform OS=Bos taurus OX=9913 GN=AMELX PE=1 SV=2	1	hf1_10472_ebo_32_1_261219.ScanId;v=1;d1=36427.36427.3	controllerType=0 controllerNumber=1 scan=36427	73.5095
34920:3	1	S.MP[+15.995]LPPHPGHPGYINFS[+79.966]YEVLTPL.K		P[+16], S[+80]	891.426	3	2672.26	2672.26	0	0.3	17	Non	290.12	290.12	5.8	4.21	1651	>sp|P02817|AMELX_BOVIN Amelogenin, X isoform OS=Bos taurus OX=9913 GN=AMELX PE=1 SV=2	1	hf1_10472_ebo_32_1_261219.ScanId;v=1;d1=25589.25589.3	controllerType=0 controllerNumber=1 scan=25589	51.5369
35479:3	1	S.MPLPPHPGHPGYIN[+0.984]FS[+79.966]YEVLTPL.K		N[+1], S[+80]	886.427	3	2657.27	2657.25	0	6.1	17	Non	291.4	291.4	77.31	4.94	1651	>sp|P02817|AMELX_BOVIN Amelogenin, X isoform OS=Bos taurus OX=9913 GN=AMELX PE=1 SV=2	1	hf1_10472_ebo_32_1_261219.ScanId;v=1;d1=25966.25966.3	controllerType=0 controllerNumber=1 scan=25966	52.2037
34336:3	1	S.MP[+15.995]LPPHPGHPGYINFS[+79.966]YEVLTPL.K		P[+16], S[+80]	891.427	3	2672.27	2672.26	0	1.3	17	Non	298.23	298.23	1.33	4.21	1651	>sp|P02817|AMELX_BOVIN Amelogenin, X isoform OS=Bos taurus OX=9913 GN=AMELX PE=1 SV=2	1	hf1_10472_ebo_32_1_261219.ScanId;v=1;d1=25200.25200.3	controllerType=0 controllerNumber=1 scan=25200	50.8499
31419:3	1	S.MP[+15.995]LPPHPGHPGYIN[+0.984]FSYEVLTPL.K		N[+1], P[+16]	865.104	3	2593.3	2593.28	0	7.1	17	Non	302.67	276.48	5.8	4.9	1651	>sp|P02817|AMELX_BOVIN Amelogenin, X isoform OS=Bos taurus OX=9913 GN=AMELX PE=1 SV=2	1	hf1_10472_ebo_32_1_261219.ScanId;v=1;d1=23286.23286.3	controllerType=0 controllerNumber=1 scan=23286	47.5157
35473:3	1	S.MPLPPHPGHPGYIN[+0.984]FS[+79.966]YEVLTPL.K		N[+1], S[+80]	886.427	3	2657.27	2657.25	0	5.5	17	Non	307.69	307.69	70.94	5.33	1651	>sp|P02817|AMELX_BOVIN Amelogenin, X isoform OS=Bos taurus OX=9913 GN=AMELX PE=1 SV=2	1	hf1_10472_ebo_32_1_261219.ScanId;v=1;d1=25962.25962.3	controllerType=0 controllerNumber=1 scan=25962	52.195
33104:3	1	S.MP[+15.995]LPPHPGHPGYINFS[+79.966]YEVLTPL.K		P[+16], S[+80]	891.429	3	2672.27	2672.26	0	4.5	17	Non	312.41	312.41	4	5.05	1651	>sp|P02817|AMELX_BOVIN Amelogenin, X isoform OS=Bos taurus OX=9913 GN=AMELX PE=1 SV=2	1	hf1_10472_ebo_32_1_261219.ScanId;v=1;d1=24384.24384.3	controllerType=0 controllerNumber=1 scan=24384	49.4328
34040:3	1	S.MP[+15.995]LPPHPGHPGYINFS[+79.966]YEVLTPL.K		P[+16], S[+80]	891.426	3	2672.26	2672.26	0	0.9	17	Non	327.78	327.78	5.8	4.83	1651	>sp|P02817|AMELX_BOVIN Amelogenin, X isoform OS=Bos taurus OX=9913 GN=AMELX PE=1 SV=2	1	hf1_10472_ebo_32_1_261219.ScanId;v=1;d1=24994.24994.3	controllerType=0 controllerNumber=1 scan=24994	50.4901
36073:3	1	S.MPLPPHPGHPGYIN[+0.984]FS[+79.966]YEVLTPL.K		N[+1], S[+80]	886.429	3	2657.27	2657.25	0	7.6	17	Non	335.05	335.05	118.4	5.39	1651	>sp|P02817|AMELX_BOVIN Amelogenin, X isoform OS=Bos taurus OX=9913 GN=AMELX PE=1 SV=2	1	hf1_10472_ebo_32_1_261219.ScanId;v=1;d1=26361.26361.3	controllerType=0 controllerNumber=1 scan=26361	52.9026
32072:3	1	S.M[+15.995]PLPPHPGHPGYIN[+0.984]FSYEVLTPL.K		M[+16], N[+1]	865.103	3	2593.29	2593.28	0	5.7	17	Non	348	296.71	2.4	5.49	1651	>sp|P02817|AMELX_BOVIN Amelogenin, X isoform OS=Bos taurus OX=9913 GN=AMELX PE=1 SV=2	1	hf1_10472_ebo_32_1_261219.ScanId;v=1;d1=23706.23706.3	controllerType=0 controllerNumber=1 scan=23706	48.2459
33158:2	1	S.MP[+15.995]LPPHPGHPGYINFS[+79.966]YEVLTPL.K		P[+16], S[+80]	1336.64	2	2672.27	2672.26	0	3.6	17	Non	350.92	350.92	4	5.55	1651	>sp|P02817|AMELX_BOVIN Amelogenin, X isoform OS=Bos taurus OX=9913 GN=AMELX PE=1 SV=2	1	hf1_10472_ebo_32_1_261219.ScanId;v=1;d1=24417.24417.2	controllerType=0 controllerNumber=1 scan=24417	49.4906
32558:2	1	S.M[+15.995]PLPPHPGHPGYINFS[+79.966]YEVLTPL.K		M[+16], S[+80]	1336.64	2	2672.28	2672.26	0	7.4	17	Non	351.43	351.43	3.72	5.61	1651	>sp|P02817|AMELX_BOVIN Amelogenin, X isoform OS=Bos taurus OX=9913 GN=AMELX PE=1 SV=2	1	hf1_10472_ebo_32_1_261219.ScanId;v=1;d1=24023.24023.2	controllerType=0 controllerNumber=1 scan=24023	48.8
32819:3	1	S.MP[+15.995]LPPHPGHPGYINFS[+79.966]YEVLTPL.K		P[+16], S[+80]	891.429	3	2672.27	2672.26	0	3.6	17	Non	358.44	358.44	4	5.29	1651	>sp|P02817|AMELX_BOVIN Amelogenin, X isoform OS=Bos taurus OX=9913 GN=AMELX PE=1 SV=2	1	hf1_10472_ebo_32_1_261219.ScanId;v=1;d1=24192.24192.3	controllerType=0 controllerNumber=1 scan=24192	49.0956
32869:2	1	S.M[+15.995]PLPPHPGHPGYINFS[+79.966]YEVLTPL.K		M[+16], S[+80]	1336.64	2	2672.28	2672.26	0	6.1	17	Non	377.3	377.3	15.44	6.7	1651	>sp|P02817|AMELX_BOVIN Amelogenin, X isoform OS=Bos taurus OX=9913 GN=AMELX PE=1 SV=2	1	hf1_10472_ebo_32_1_261219.ScanId;v=1;d1=24225.24225.2	controllerType=0 controllerNumber=1 scan=24225	49.1531
35188:3	1	S.MPLPPHPGHPGYIN[+0.984]FS[+79.966]YEVLTPL.K		N[+1], S[+80]	886.428	3	2657.27	2657.25	0	7.2	17	Non	380.84	380.84	114.74	6.22	1651	>sp|P02817|AMELX_BOVIN Amelogenin, X isoform OS=Bos taurus OX=9913 GN=AMELX PE=1 SV=2	1	hf1_10472_ebo_32_1_261219.ScanId;v=1;d1=25768.25768.3	controllerType=0 controllerNumber=1 scan=25768	51.8516
31110:3	1	S.MP[+15.995]LPPHPGHPGYIN[+0.984]FSYEVLTPL.K		N[+1], P[+16]	865.106	3	2593.3	2593.28	0	9.1	17	Non	391.02	352.31	5.8	5.35	1651	>sp|P02817|AMELX_BOVIN Amelogenin, X isoform OS=Bos taurus OX=9913 GN=AMELX PE=1 SV=2	1	hf1_10472_ebo_32_1_261219.ScanId;v=1;d1=23083.23083.3	controllerType=0 controllerNumber=1 scan=23083	47.1648
35582:2	1	S.MPLPPHPGHPGYIN[+0.984]FS[+79.966]YEVLTPL.K		N[+1], S[+80]	1329.14	2	2657.27	2657.25	0	7.3	17	Non	396.15	396.15	154.91	6.49	1651	>sp|P02817|AMELX_BOVIN Amelogenin, X isoform OS=Bos taurus OX=9913 GN=AMELX PE=1 SV=2	1	hf1_10472_ebo_32_1_261219.ScanId;v=1;d1=26033.26033.2	controllerType=0 controllerNumber=1 scan=26033	52.3182
32514:3	1	S.M[+15.995]PLPPHPGHPGYINFS[+79.966]YEVLTPL.K		M[+16], S[+80]	891.43	3	2672.28	2672.26	0	5.3	17	Non	410.18	410.18	14.38	6.46	1651	>sp|P02817|AMELX_BOVIN Amelogenin, X isoform OS=Bos taurus OX=9913 GN=AMELX PE=1 SV=2	1	hf1_10472_ebo_32_1_261219.ScanId;v=1;d1=23994.23994.3	controllerType=0 controllerNumber=1 scan=23994	48.7523
35768:3	1	S.MPLPPHPGHPGYIN[+0.984]FS[+79.966]YEVLTPL.K		N[+1], S[+80]	886.428	3	2657.27	2657.25	0	6.6	17	Non	414.54	414.54	121.85	6.46	1651	>sp|P02817|AMELX_BOVIN Amelogenin, X isoform OS=Bos taurus OX=9913 GN=AMELX PE=1 SV=2	1	hf1_10472_ebo_32_1_261219.ScanId;v=1;d1=26160.26160.3	controllerType=0 controllerNumber=1 scan=26160	52.5464
31725:3	1	S.MP[+15.995]LPPHPGHPGYIN[+0.984]FSYEVLTPL.K		N[+1], P[+16]	865.103	3	2593.29	2593.28	0	5.7	17	Non	439.04	403.3	5.8	6.73	1651	>sp|P02817|AMELX_BOVIN Amelogenin, X isoform OS=Bos taurus OX=9913 GN=AMELX PE=1 SV=2	1	hf1_10472_ebo_32_1_261219.ScanId;v=1;d1=23488.23488.3	controllerType=0 controllerNumber=1 scan=23488	47.8671
31735:3	1	S.MP[+15.995]LPPHPGHPGYINFS[+79.966]Y[+15.995]EVLTPL.K		P[+16], S[+80], Y[+16]	896.762	3	2688.27	2688.26	0	5.9	17	Non	149.73	60.74	1.59	1.45	1651	>sp|P02817|AMELX_BOVIN Amelogenin, X isoform OS=Bos taurus OX=9913 GN=AMELX PE=1 SV=2	1	hf1_10472_ebo_32_1_261219.ScanId;v=1;d1=23493.23493.3	controllerType=0 controllerNumber=1 scan=23493	47.8746
30928:3	1	S.MPLPPHPGHPGYIN[+0.984]FS[+79.966]Y[+31.990]EVLTPL.K		N[+1], S[+80], Y[+32]	897.093	3	2689.26	2689.24	0	8.6	17	Non	175.73	175.73	18.4	2.5	1651	>sp|P02817|AMELX_BOVIN Amelogenin, X isoform OS=Bos taurus OX=9913 GN=AMELX PE=1 SV=2	1	hf1_10472_ebo_32_1_261219.ScanId;v=1;d1=22968.22968.3	controllerType=0 controllerNumber=1 scan=22968	46.9625
32759:3	1	S.M[+15.995]PLPPHPGHP[+15.995]GYINFS[+79.966]YEVLTPL.K		M[+16], P[+16], S[+80]	896.76	3	2688.26	2688.26	0	2.9	17	Non	194.67	194.67	12.01	2.47	1651	>sp|P02817|AMELX_BOVIN Amelogenin, X isoform OS=Bos taurus OX=9913 GN=AMELX PE=1 SV=2	1	hf1_10472_ebo_32_1_261219.ScanId;v=1;d1=24152.24152.3	controllerType=0 controllerNumber=1 scan=24152	49.0252
33058:3	1	S.MP[+15.995]LPPHPGHPGYINF[+15.995]S[+79.966]YEVLTPL.K		F[+16], P[+16], S[+80]	896.759	3	2688.26	2688.26	0	2.1	17	Non	205.98	205.98	2.68	2.44	1651	>sp|P02817|AMELX_BOVIN Amelogenin, X isoform OS=Bos taurus OX=9913 GN=AMELX PE=1 SV=2	1	hf1_10472_ebo_32_1_261219.ScanId;v=1;d1=24353.24353.3	controllerType=0 controllerNumber=1 scan=24353	49.3785
33422:3	1	S.MP[+15.995]LPPHPGHPGYIN[+0.984]FS[+79.966]YEVLTPL.K		N[+1], P[+16], S[+80]	891.76	3	2673.27	2673.25	0	7.6	17	Non	244.42	244.42	4	4.46	1651	>sp|P02817|AMELX_BOVIN Amelogenin, X isoform OS=Bos taurus OX=9913 GN=AMELX PE=1 SV=2	1	hf1_10472_ebo_32_1_261219.ScanId;v=1;d1=24583.24583.3	controllerType=0 controllerNumber=1 scan=24583	49.7785
34624:3	1	S.MPLPPHPGHPGY[+15.995]IN[+0.984]FS[+79.966]YEVLTPL.K		N[+1], S[+80], Y[+16]	891.76	3	2673.27	2673.25	0	7.8	17	Non	254.9	208.22	0.78	4.51	1651	>sp|P02817|AMELX_BOVIN Amelogenin, X isoform OS=Bos taurus OX=9913 GN=AMELX PE=1 SV=2	1	hf1_10472_ebo_32_1_261219.ScanId;v=1;d1=25393.25393.3	controllerType=0 controllerNumber=1 scan=25393	51.1925
33374:3	1	S.MP[+15.995]LP[+15.995]PHPGHPGYINFS[+79.966]YEVLTPL.K		P[+16]*2, S[+80]	896.76	3	2688.26	2688.26	0	2.7	17	Non	257.41	257.41	0.26	3.63	1651	>sp|P02817|AMELX_BOVIN Amelogenin, X isoform OS=Bos taurus OX=9913 GN=AMELX PE=1 SV=2	1	hf1_10472_ebo_32_1_261219.ScanId;v=1;d1=24551.24551.3	controllerType=0 controllerNumber=1 scan=24551	49.7227
34921:3	1	S.MP[+15.995]LPPHPGHPGYIN[+0.984]FS[+79.966]YEVLTPL.K		N[+1], P[+16], S[+80]	891.758	3	2673.26	2673.25	0	4.9	17	Non	270.94	270.94	5.8	4.67	1651	>sp|P02817|AMELX_BOVIN Amelogenin, X isoform OS=Bos taurus OX=9913 GN=AMELX PE=1 SV=2	1	hf1_10472_ebo_32_1_261219.ScanId;v=1;d1=25589.25589.3	controllerType=0 controllerNumber=1 scan=25589	51.5369
32107:3	1	S.MP[+15.995]LPPHPGHP[+15.995]GYINFS[+79.966]YEVLTPL.K		P[+16]*2, S[+80]	896.762	3	2688.27	2688.26	0	5.8	17	Non	282.63	282.63	5.8	4.94	1651	>sp|P02817|AMELX_BOVIN Amelogenin, X isoform OS=Bos taurus OX=9913 GN=AMELX PE=1 SV=2	1	hf1_10472_ebo_32_1_261219.ScanId;v=1;d1=23730.23730.3	controllerType=0 controllerNumber=1 scan=23730	48.2901
34041:3	1	S.MP[+15.995]LPPHPGHPGYIN[+0.984]FS[+79.966]YEVLTPL.K		N[+1], P[+16], S[+80]	891.759	3	2673.26	2673.25	0	6.7	17	Non	287.33	270.94	5.8	4.73	1651	>sp|P02817|AMELX_BOVIN Amelogenin, X isoform OS=Bos taurus OX=9913 GN=AMELX PE=1 SV=2	1	hf1_10472_ebo_32_1_261219.ScanId;v=1;d1=24994.24994.3	controllerType=0 controllerNumber=1 scan=24994	50.4901
33744:3	1	S.MP[+15.995]LPPHPGHPGYIN[+0.984]FS[+79.966]YEVLTPL.K		N[+1], P[+16], S[+80]	891.758	3	2673.26	2673.25	0	5.3	17	Non	291.24	291.24	4	5.33	1651	>sp|P02817|AMELX_BOVIN Amelogenin, X isoform OS=Bos taurus OX=9913 GN=AMELX PE=1 SV=2	1	hf1_10472_ebo_32_1_261219.ScanId;v=1;d1=24791.24791.3	controllerType=0 controllerNumber=1 scan=24791	50.1381
33797:2	1	S.M[+15.995]PLPPHPGHPGYIN[+0.984]FS[+79.966]YEVLTPL.K		M[+16], N[+1], S[+80]	1337.14	2	2673.26	2673.25	0	6.6	17	Non	319.93	241.21	3.53	4.94	1651	>sp|P02817|AMELX_BOVIN Amelogenin, X isoform OS=Bos taurus OX=9913 GN=AMELX PE=1 SV=2	1	hf1_10472_ebo_32_1_261219.ScanId;v=1;d1=24828.24828.2	controllerType=0 controllerNumber=1 scan=24828	50.2021
33486:2	1	S.M[+15.995]PLPPHPGHPGYIN[+0.984]FS[+79.966]YEVLTPL.K		M[+16], N[+1], S[+80]	1337.14	2	2673.27	2673.25	0	9.4	17	Non	336.34	264.64	8.14	4.71	1651	>sp|P02817|AMELX_BOVIN Amelogenin, X isoform OS=Bos taurus OX=9913 GN=AMELX PE=1 SV=2	1	hf1_10472_ebo_32_1_261219.ScanId;v=1;d1=24622.24622.2	controllerType=0 controllerNumber=1 scan=24622	49.8447
32413:3	1	S.MP[+15.995]LPPHPGH[+15.995]PGYINFS[+79.966]YEVLTPL.K		H[+16], P[+16], S[+80]	896.762	3	2688.27	2688.26	0	5.7	17	Non	375.75	375.75	5.8	6.49	1651	>sp|P02817|AMELX_BOVIN Amelogenin, X isoform OS=Bos taurus OX=9913 GN=AMELX PE=1 SV=2	1	hf1_10472_ebo_32_1_261219.ScanId;v=1;d1=23928.23928.3	controllerType=0 controllerNumber=1 scan=23928	48.6365
29742:4	1	S.MPLPPHPGHPGYINFSYEVLTPLK.W			676.852	4	2704.39	2704.4	0	-3.5	17	NRagged	303.42	275.44	275.44	4.9	1651	>sp|P02817|AMELX_BOVIN Amelogenin, X isoform OS=Bos taurus OX=9913 GN=AMELX PE=1 SV=2	1	hf1_10472_ebo_32_1_261219.ScanId;v=1;d1=22180.22180.4	controllerType=0 controllerNumber=1 scan=22180	45.603
30035:4	1	S.MPLPPHPGHPGYINFSYEVLTPLK.W			676.851	4	2704.38	2704.4	0	-5.5	17	NRagged	348.49	348.49	348.49	4.95	1651	>sp|P02817|AMELX_BOVIN Amelogenin, X isoform OS=Bos taurus OX=9913 GN=AMELX PE=1 SV=2	1	hf1_10472_ebo_32_1_261219.ScanId;v=1;d1=22377.22377.4	controllerType=0 controllerNumber=1 scan=22377	45.9448
28813:4	1	S.MPLPPHPGHPGYINFSYEVLTPLK.W			676.855	4	2704.4	2704.4	0	1.6	17	NRagged	437.54	395.94	395.94	6.64	1651	>sp|P02817|AMELX_BOVIN Amelogenin, X isoform OS=Bos taurus OX=9913 GN=AMELX PE=1 SV=2	1	hf1_10472_ebo_32_1_261219.ScanId;v=1;d1=21566.21566.4	controllerType=0 controllerNumber=1 scan=21566	44.5482
29441:4	1	S.MPLPPHPGHPGYINFSYEVLTPLK.W			676.853	4	2704.39	2704.4	0	-1.8	17	NRagged	519.75	499.38	499.38	7.05	1651	>sp|P02817|AMELX_BOVIN Amelogenin, X isoform OS=Bos taurus OX=9913 GN=AMELX PE=1 SV=2	1	hf1_10472_ebo_32_1_261219.ScanId;v=1;d1=21976.21976.4	controllerType=0 controllerNumber=1 scan=21976	45.251
49437:3	1	S.MPLPPHPGHPGYINFS[+79.966]YEVLTPLK.W		S[+80]	928.794	3	2784.37	2784.36	0	1.6	17	NRagged	35.14	35.14	9.36	2.39	1651	>sp|P02817|AMELX_BOVIN Amelogenin, X isoform OS=Bos taurus OX=9913 GN=AMELX PE=1 SV=2	1	hf1_10472_ebo_32_1_261219.ScanId;v=1;d1=35954.35954.3	controllerType=0 controllerNumber=1 scan=35954	72.381
48221:3	1	S.MPLPPHPGHPGYINFS[+79.966]YEVLTPLK.W		S[+80]	928.794	3	2784.37	2784.36	0	1.6	17	NRagged	86.48	86.48	56.15	1.52	1651	>sp|P02817|AMELX_BOVIN Amelogenin, X isoform OS=Bos taurus OX=9913 GN=AMELX PE=1 SV=2	1	hf1_10472_ebo_32_1_261219.ScanId;v=1;d1=34958.34958.3	controllerType=0 controllerNumber=1 scan=34958	70.1485
47457:3	1	S.MPLPPHPGHPGYINFS[+79.966]YEVLTPLK.W		S[+80]	928.799	3	2784.38	2784.36	0	6.9	17	NRagged	121.24	121.24	1.7	2.63	1651	>sp|P02817|AMELX_BOVIN Amelogenin, X isoform OS=Bos taurus OX=9913 GN=AMELX PE=1 SV=2	1	hf1_10472_ebo_32_1_261219.ScanId;v=1;d1=34328.34328.3	controllerType=0 controllerNumber=1 scan=34328	68.7685
01626:3	1	S.MPLPPHPGHPGYINFS[+79.966]YEVLTPLK.W		S[+80]	928.792	3	2784.36	2784.36	0	0.3	17	NRagged	186.26	186.26	53.22	3.61	1651	>sp|P02817|AMELX_BOVIN Amelogenin, X isoform OS=Bos taurus OX=9913 GN=AMELX PE=1 SV=2	1	hf1_10472_ebo_32_1_261219.ScanId;v=1;d1=2834.2834.3	controllerType=0 controllerNumber=1 scan=2834	12.5693
48016:4	1	S.MPLPPHPGHPGYINFS[+79.966]YEVLTPLK.W		S[+80]	696.847	4	2784.37	2784.36	0	1.7	17	NRagged	205.13	205.13	21.98	3.8	1651	>sp|P02817|AMELX_BOVIN Amelogenin, X isoform OS=Bos taurus OX=9913 GN=AMELX PE=1 SV=2	1	hf1_10472_ebo_32_1_261219.ScanId;v=1;d1=34790.34790.4	controllerType=0 controllerNumber=1 scan=34790	69.7987
47833:3	1	S.MPLPPHPGHPGYINFS[+79.966]YEVLTPLK.W		S[+80]	928.795	3	2784.37	2784.36	0	3.2	17	NRagged	235.7	235.7	31.93	4.42	1651	>sp|P02817|AMELX_BOVIN Amelogenin, X isoform OS=Bos taurus OX=9913 GN=AMELX PE=1 SV=2	1	hf1_10472_ebo_32_1_261219.ScanId;v=1;d1=34639.34639.3	controllerType=0 controllerNumber=1 scan=34639	69.458
30177:5	1	S.MPLPPHPGHPGYINFS[+79.966]YEVLTPLK.W		S[+80]	557.682	5	2784.38	2784.36	0	6.4	17	NRagged	254.07	254.07	49.11	4.72	1651	>sp|P02817|AMELX_BOVIN Amelogenin, X isoform OS=Bos taurus OX=9913 GN=AMELX PE=1 SV=2	1	hf1_10472_ebo_32_1_261219.ScanId;v=1;d1=22473.22473.5	controllerType=0 controllerNumber=1 scan=22473	46.1083
28439:3	1	S.MPLPPHPGHPGYINFS[+79.966]YEVLTPLK.W		S[+80]	928.79	3	2784.36	2784.36	0	-2.1	17	NRagged	268.9	268.9	86.67	5.04	1651	>sp|P02817|AMELX_BOVIN Amelogenin, X isoform OS=Bos taurus OX=9913 GN=AMELX PE=1 SV=2	1	hf1_10472_ebo_32_1_261219.ScanId;v=1;d1=21317.21317.3	controllerType=0 controllerNumber=1 scan=21317	44.1221
01114:3	1	S.MPLPPHPGHPGYINFS[+79.966]YEVLTPLK.W		S[+80]	928.794	3	2784.37	2784.36	0	1.8	17	NRagged	287.02	287.02	184.61	5.73	1651	>sp|P02817|AMELX_BOVIN Amelogenin, X isoform OS=Bos taurus OX=9913 GN=AMELX PE=1 SV=2	1	hf1_10472_ebo_32_1_261219.ScanId;v=1;d1=2465.2465.3	controllerType=0 controllerNumber=1 scan=2465	11.8777
01370:3	1	S.MPLPPHPGHPGYINFS[+79.966]YEVLTPLK.W		S[+80]	928.793	3	2784.36	2784.36	0	0.4	17	NRagged	341.04	341.04	115.27	6.47	1651	>sp|P02817|AMELX_BOVIN Amelogenin, X isoform OS=Bos taurus OX=9913 GN=AMELX PE=1 SV=2	1	hf1_10472_ebo_32_1_261219.ScanId;v=1;d1=2648.2648.3	controllerType=0 controllerNumber=1 scan=2648	12.2257
32297:3	1	S.MPLPPHPGHPGYINFS[+79.966]YEVLTPLK.W		S[+80]	928.796	3	2784.37	2784.36	0	4.3	17	NRagged	377.57	377.57	78.57	7.02	1651	>sp|P02817|AMELX_BOVIN Amelogenin, X isoform OS=Bos taurus OX=9913 GN=AMELX PE=1 SV=2	1	hf1_10472_ebo_32_1_261219.ScanId;v=1;d1=23854.23854.3	controllerType=0 controllerNumber=1 scan=23854	48.5057
27357:4	1	S.MP[+15.995]LPPHPGHPGYINFSYEVLTPLK.W		P[+16]	680.855	4	2720.4	2720.39	0	3	17	NRagged	536.03	536.03	5.8	7.81	1651	>sp|P02817|AMELX_BOVIN Amelogenin, X isoform OS=Bos taurus OX=9913 GN=AMELX PE=1 SV=2	1	hf1_10472_ebo_32_1_261219.ScanId;v=1;d1=20587.20587.4	controllerType=0 controllerNumber=1 scan=20587	42.8847
28077:4	1	S.M[+15.995]PLPPHPGHPGYINFSYEVLTPLK.W		M[+16]	680.852	4	2720.39	2720.39	0	-1.7	17	NRagged	557.17	556.53	5.61	7.2	1651	>sp|P02817|AMELX_BOVIN Amelogenin, X isoform OS=Bos taurus OX=9913 GN=AMELX PE=1 SV=2	1	hf1_10472_ebo_32_1_261219.ScanId;v=1;d1=21076.21076.4	controllerType=0 controllerNumber=1 scan=21076	43.7105
26855:4	1	S.MP[+15.995]LPPHPGHPGYINFSYEVLTPLK.W		P[+16]	680.857	4	2720.41	2720.39	0	5.5	17	NRagged	652.05	630.47	1.35	10.86	1651	>sp|P02817|AMELX_BOVIN Amelogenin, X isoform OS=Bos taurus OX=9913 GN=AMELX PE=1 SV=2	1	hf1_10472_ebo_32_1_261219.ScanId;v=1;d1=20254.20254.4	controllerType=0 controllerNumber=1 scan=20254	42.3195
30518:4	1	S.MPLPPHPGHPGYINFS[+79.966]YEVLTPLK.W		S[+80]	696.851	4	2784.38	2784.36	0	7.1	17	NRagged	761.38	761.38	371.53	12.65	1651	>sp|P02817|AMELX_BOVIN Amelogenin, X isoform OS=Bos taurus OX=9913 GN=AMELX PE=1 SV=2	1	hf1_10472_ebo_32_1_261219.ScanId;v=1;d1=22696.22696.4	controllerType=0 controllerNumber=1 scan=22696	46.4981
29908:4	1	S.MPLPPHPGHPGYINFS[+79.966]YEVLTPLK.W		S[+80]	696.85	4	2784.38	2784.36	0	6.2	17	NRagged	786.14	786.14	397.6	12.86	1651	>sp|P02817|AMELX_BOVIN Amelogenin, X isoform OS=Bos taurus OX=9913 GN=AMELX PE=1 SV=2	1	hf1_10472_ebo_32_1_261219.ScanId;v=1;d1=22293.22293.4	controllerType=0 controllerNumber=1 scan=22293	45.7987
30055:2	1	S.MPLPPHPGHPGYINFS[+79.966]YEVLTPLK.W		S[+80]	1392.69	2	2784.38	2784.36	0	5.6	17	NRagged	790.88	790.88	241.17	12.39	1651	>sp|P02817|AMELX_BOVIN Amelogenin, X isoform OS=Bos taurus OX=9913 GN=AMELX PE=1 SV=2	1	hf1_10472_ebo_32_1_261219.ScanId;v=1;d1=22392.22392.2	controllerType=0 controllerNumber=1 scan=22392	45.969
30215:4	1	S.MPLPPHPGHPGYINFS[+79.966]YEVLTPLK.W		S[+80]	696.85	4	2784.38	2784.36	0	6.2	17	NRagged	807.96	807.96	447.29	13.86	1651	>sp|P02817|AMELX_BOVIN Amelogenin, X isoform OS=Bos taurus OX=9913 GN=AMELX PE=1 SV=2	1	hf1_10472_ebo_32_1_261219.ScanId;v=1;d1=22498.22498.4	controllerType=0 controllerNumber=1 scan=22498	46.1531
50021:3	1	S.MPLPPHPGHPGYINFS[+79.966]YEVLTPLK.W		S[+80]	928.801	3	2784.39	2784.36	0	9.5	17	NRagged	823.43	823.43	302.06	13.34	1651	>sp|P02817|AMELX_BOVIN Amelogenin, X isoform OS=Bos taurus OX=9913 GN=AMELX PE=1 SV=2	1	hf1_10472_ebo_32_1_261219.ScanId;v=1;d1=36439.36439.3	controllerType=0 controllerNumber=1 scan=36439	73.5305
30623:3	1	S.MPLPPHPGHPGYINFS[+79.966]YEVLTPLK.W		S[+80]	928.795	3	2784.37	2784.36	0	3.5	17	NRagged	1049.79	1049.79	437.3	17.8	1651	>sp|P02817|AMELX_BOVIN Amelogenin, X isoform OS=Bos taurus OX=9913 GN=AMELX PE=1 SV=2	1	hf1_10472_ebo_32_1_261219.ScanId;v=1;d1=22763.22763.3	controllerType=0 controllerNumber=1 scan=22763	46.6134
30321:3	1	S.MPLPPHPGHPGYINFS[+79.966]YEVLTPLK.W		S[+80]	928.797	3	2784.38	2784.36	0	5.6	17	NRagged	1169.72	1169.72	491.54	21.08	1651	>sp|P02817|AMELX_BOVIN Amelogenin, X isoform OS=Bos taurus OX=9913 GN=AMELX PE=1 SV=2	1	hf1_10472_ebo_32_1_261219.ScanId;v=1;d1=22564.22564.3	controllerType=0 controllerNumber=1 scan=22564	46.2688
30015:3	1	S.MPLPPHPGHPGYINFS[+79.966]YEVLTPLK.W		S[+80]	928.798	3	2784.38	2784.36	0	6.2	17	NRagged	1212.87	1212.87	550.16	22.08	1651	>sp|P02817|AMELX_BOVIN Amelogenin, X isoform OS=Bos taurus OX=9913 GN=AMELX PE=1 SV=2	1	hf1_10472_ebo_32_1_261219.ScanId;v=1;d1=22366.22366.3	controllerType=0 controllerNumber=1 scan=22366	45.9254
49155:3	1	S.MP[+15.995]LPPHPGHPGYINFS[+79.966]YEVLTPLK.W		P[+16], S[+80]	934.127	3	2800.37	2800.36	0	3.4	17	NRagged	3.72	3.72	3.72	2.41	1651	>sp|P02817|AMELX_BOVIN Amelogenin, X isoform OS=Bos taurus OX=9913 GN=AMELX PE=1 SV=2	1	hf1_10472_ebo_32_1_261219.ScanId;v=1;d1=35719.35719.3	controllerType=0 controllerNumber=1 scan=35719	71.8392
00502:3	1	S.MP[+15.995]LPPHPGHPGYINFS[+79.966]YEVLTPLK.W		P[+16], S[+80]	934.127	3	2800.37	2800.36	0	3.3	17	NRagged	33.82	33.82	4	2.7	1651	>sp|P02817|AMELX_BOVIN Amelogenin, X isoform OS=Bos taurus OX=9913 GN=AMELX PE=1 SV=2	1	hf1_10472_ebo_32_1_261219.ScanId;v=1;d1=1828.1828.3	controllerType=0 controllerNumber=1 scan=1828	9.7588
00485:3	1	S.MP[+15.995]LPPHPGHPGYINFS[+79.966]YEVLTPLK.W		P[+16], S[+80]	934.127	3	2800.37	2800.36	0	3	17	NRagged	68.74	68.74	4	2.9	1651	>sp|P02817|AMELX_BOVIN Amelogenin, X isoform OS=Bos taurus OX=9913 GN=AMELX PE=1 SV=2	1	hf1_10472_ebo_32_1_261219.ScanId;v=1;d1=1765.1765.3	controllerType=0 controllerNumber=1 scan=1765	9.4164
48818:3	1	S.MPLPPHPGHPGYIN[+0.984]FS[+79.966]YEVLTPLK.W		N[+1], S[+80]	929.128	3	2785.37	2785.35	0	8.7	17	NRagged	82.13	82.13	41.24	2.52	1651	>sp|P02817|AMELX_BOVIN Amelogenin, X isoform OS=Bos taurus OX=9913 GN=AMELX PE=1 SV=2	1	hf1_10472_ebo_32_1_261219.ScanId;v=1;d1=35453.35453.3	controllerType=0 controllerNumber=1 scan=35453	71.2587
01840:3	1	S.M[+15.995]PLPPHPGHPGYINFS[+79.966]YEVLTPLK.W		M[+16], S[+80]	934.127	3	2800.37	2800.36	0	3.5	17	NRagged	83.4	83.4	11.99	2.9	1651	>sp|P02817|AMELX_BOVIN Amelogenin, X isoform OS=Bos taurus OX=9913 GN=AMELX PE=1 SV=2	1	hf1_10472_ebo_32_1_261219.ScanId;v=1;d1=2988.2988.3	controllerType=0 controllerNumber=1 scan=2988	12.8485
00707:3	1	S.MP[+15.995]LPPHPGHPGYINFS[+79.966]YEVLTPLK.W		P[+16], S[+80]	934.125	3	2800.36	2800.36	0	1	17	NRagged	87.17	87.17	4	2.9	1651	>sp|P02817|AMELX_BOVIN Amelogenin, X isoform OS=Bos taurus OX=9913 GN=AMELX PE=1 SV=2	1	hf1_10472_ebo_32_1_261219.ScanId;v=1;d1=2148.2148.3	controllerType=0 controllerNumber=1 scan=2148	11.113
48630:3	1	S.MP[+15.995]LPPHPGHPGYINFS[+79.966]YEVLTPLK.W		P[+16], S[+80]	934.125	3	2800.36	2800.36	0	0.7	17	NRagged	105.59	105.59	2.5	2.47	1651	>sp|P02817|AMELX_BOVIN Amelogenin, X isoform OS=Bos taurus OX=9913 GN=AMELX PE=1 SV=2	1	hf1_10472_ebo_32_1_261219.ScanId;v=1;d1=35303.35303.3	controllerType=0 controllerNumber=1 scan=35303	70.9109
48242:3	1	S.MP[+15.995]LPPHPGHPGYINFS[+79.966]YEVLTPLK.W		P[+16], S[+80]	934.125	3	2800.36	2800.36	0	1.1	17	NRagged	106.62	106.62	4	2.47	1651	>sp|P02817|AMELX_BOVIN Amelogenin, X isoform OS=Bos taurus OX=9913 GN=AMELX PE=1 SV=2	1	hf1_10472_ebo_32_1_261219.ScanId;v=1;d1=34979.34979.3	controllerType=0 controllerNumber=1 scan=34979	70.1887
00008:3	1	S.MP[+15.995]LPPHPGHPGYINFS[+79.966]YEVLTPLK.W		P[+16], S[+80]	934.129	3	2800.37	2800.36	0	5.6	17	NRagged	136.44	136.44	4	3.44	1651	>sp|P02817|AMELX_BOVIN Amelogenin, X isoform OS=Bos taurus OX=9913 GN=AMELX PE=1 SV=2	1	hf1_10472_ebo_32_1_261219.ScanId;v=1;d1=98.98.3	controllerType=0 controllerNumber=1 scan=98	0.5299
48464:3	1	S.MP[+15.995]LPPHPGHPGYINFS[+79.966]YEVLTPLK.W		P[+16], S[+80]	934.129	3	2800.37	2800.36	0	5.5	17	NRagged	144.68	144.68	4	3.44	1651	>sp|P02817|AMELX_BOVIN Amelogenin, X isoform OS=Bos taurus OX=9913 GN=AMELX PE=1 SV=2	1	hf1_10472_ebo_32_1_261219.ScanId;v=1;d1=35163.35163.3	controllerType=0 controllerNumber=1 scan=35163	70.5995
48020:3	1	S.MPLPPHPGHPGYIN[+0.984]FS[+79.966]YEVLTPLK.W		N[+1], S[+80]	929.127	3	2785.37	2785.35	0	7	17	NRagged	152.97	152.97	16.46	2.91	1651	>sp|P02817|AMELX_BOVIN Amelogenin, X isoform OS=Bos taurus OX=9913 GN=AMELX PE=1 SV=2	1	hf1_10472_ebo_32_1_261219.ScanId;v=1;d1=34792.34792.3	controllerType=0 controllerNumber=1 scan=34792	69.8017
48597:3	1	S.MPLPPHPGHPGYIN[+0.984]FS[+79.966]YEVLTPLK.W		N[+1], S[+80]	929.129	3	2785.37	2785.35	0	8.9	17	NRagged	155.69	155.69	49.72	3.24	1651	>sp|P02817|AMELX_BOVIN Amelogenin, X isoform OS=Bos taurus OX=9913 GN=AMELX PE=1 SV=2	1	hf1_10472_ebo_32_1_261219.ScanId;v=1;d1=35274.35274.3	controllerType=0 controllerNumber=1 scan=35274	70.8447
49019:3	1	S.MPLPPHPGHPGYIN[+0.984]FS[+79.966]YEVLTPLK.W		N[+1], S[+80]	929.129	3	2785.37	2785.35	0	9.2	17	NRagged	157.15	157.15	43.59	3.24	1651	>sp|P02817|AMELX_BOVIN Amelogenin, X isoform OS=Bos taurus OX=9913 GN=AMELX PE=1 SV=2	1	hf1_10472_ebo_32_1_261219.ScanId;v=1;d1=35613.35613.3	controllerType=0 controllerNumber=1 scan=35613	71.6039
48982:3	1	S.M[+15.995]PLPPHPGHPGYINFS[+79.966]YEVLTPLK.W		M[+16], S[+80]	934.129	3	2800.37	2800.36	0	5.4	17	NRagged	162.13	162.13	8.28	4.33	1651	>sp|P02817|AMELX_BOVIN Amelogenin, X isoform OS=Bos taurus OX=9913 GN=AMELX PE=1 SV=2	1	hf1_10472_ebo_32_1_261219.ScanId;v=1;d1=35581.35581.3	controllerType=0 controllerNumber=1 scan=35581	71.542
01608:4	1	S.MP[+15.995]LPPHPGHPGYINFS[+79.966]YEVLTPLK.W		P[+16], S[+80]	700.846	4	2800.36	2800.36	0	1.2	17	NRagged	177.61	177.61	4	3.41	1651	>sp|P02817|AMELX_BOVIN Amelogenin, X isoform OS=Bos taurus OX=9913 GN=AMELX PE=1 SV=2	1	hf1_10472_ebo_32_1_261219.ScanId;v=1;d1=2820.2820.4	controllerType=0 controllerNumber=1 scan=2820	12.5428
49707:3	1	S.MP[+15.995]LPPHPGHPGYINFS[+79.966]YEVLTPLK.W		P[+16], S[+80]	934.127	3	2800.37	2800.36	0	3.5	17	NRagged	195.18	195.18	4	4.32	1651	>sp|P02817|AMELX_BOVIN Amelogenin, X isoform OS=Bos taurus OX=9913 GN=AMELX PE=1 SV=2	1	hf1_10472_ebo_32_1_261219.ScanId;v=1;d1=36187.36187.3	controllerType=0 controllerNumber=1 scan=36187	72.9667
33835:3	1	S.MP[+15.995]LPPHPGHPGYINFS[+79.966]YEVLTPLK.W		P[+16], S[+80]	934.124	3	2800.36	2800.36	0	0.5	17	NRagged	195.75	195.75	5.8	2.67	1651	>sp|P02817|AMELX_BOVIN Amelogenin, X isoform OS=Bos taurus OX=9913 GN=AMELX PE=1 SV=2	1	hf1_10472_ebo_32_1_261219.ScanId;v=1;d1=24855.24855.3	controllerType=0 controllerNumber=1 scan=24855	50.2485
27494:4	1	S.MP[+15.995]LP[+15.995]PHPGHPGYINFSYEVLTPLK.W		P[+16]*2	684.853	4	2736.39	2736.39	0	1.6	17	NRagged	212.32	212.32	5.8	3.43	1651	>sp|P02817|AMELX_BOVIN Amelogenin, X isoform OS=Bos taurus OX=9913 GN=AMELX PE=1 SV=2	1	hf1_10472_ebo_32_1_261219.ScanId;v=1;d1=20680.20680.2	controllerType=0 controllerNumber=1 scan=20680	43.0459
47311:3	1	S.MPLPPHPGHPGYIN[+0.984]FS[+79.966]YEVLTPLK.W		N[+1], S[+80]	929.129	3	2785.37	2785.35	0	9.8	17	NRagged	215.47	215.47	46.39	4.22	1651	>sp|P02817|AMELX_BOVIN Amelogenin, X isoform OS=Bos taurus OX=9913 GN=AMELX PE=1 SV=2	1	hf1_10472_ebo_32_1_261219.ScanId;v=1;d1=34209.34209.3	controllerType=0 controllerNumber=1 scan=34209	68.5182
31173:3	1	S.M[+15.995]PLPPHPGHPGYINFS[+79.966]YEVLTPLK.W		M[+16], S[+80]	934.121	3	2800.35	2800.36	0	-2.9	17	NRagged	242.96	242.96	10.19	4.67	1651	>sp|P02817|AMELX_BOVIN Amelogenin, X isoform OS=Bos taurus OX=9913 GN=AMELX PE=1 SV=2	1	hf1_10472_ebo_32_1_261219.ScanId;v=1;d1=23126.23126.3	controllerType=0 controllerNumber=1 scan=23126	47.2401
28349:5	1	S.MP[+15.995]LPPHPGHPGYINFS[+79.966]YEVLTPLK.W		P[+16], S[+80]	560.879	5	2800.37	2800.36	0	3.8	17	NRagged	268.98	268.98	4	4.44	1651	>sp|P02817|AMELX_BOVIN Amelogenin, X isoform OS=Bos taurus OX=9913 GN=AMELX PE=1 SV=2	1	hf1_10472_ebo_32_1_261219.ScanId;v=1;d1=21256.21256.5	controllerType=0 controllerNumber=1 scan=21256	44.017
47681:3	1	S.MP[+15.995]LPPHPGHPGYINFS[+79.966]YEVLTPLK.W		P[+16], S[+80]	934.126	3	2800.36	2800.36	0	2.6	17	NRagged	271.5	271.5	4	5.6	1651	>sp|P02817|AMELX_BOVIN Amelogenin, X isoform OS=Bos taurus OX=9913 GN=AMELX PE=1 SV=2	1	hf1_10472_ebo_32_1_261219.ScanId;v=1;d1=34514.34514.3	controllerType=0 controllerNumber=1 scan=34514	69.1671
30683:4	1	S.MP[+15.995]LPPHPGHPGYINFS[+79.966]YEVLTPLK.W		P[+16], S[+80]	700.842	4	2800.35	2800.36	0	-3.5	17	NRagged	275.24	275.24	5.8	4.46	1651	>sp|P02817|AMELX_BOVIN Amelogenin, X isoform OS=Bos taurus OX=9913 GN=AMELX PE=1 SV=2	1	hf1_10472_ebo_32_1_261219.ScanId;v=1;d1=22801.22801.6	controllerType=0 controllerNumber=1 scan=22801	46.6766
28440:3	1	S.MPLPPHPGHPGYIN[+0.984]FS[+79.966]YEVLTPLK.W		N[+1], S[+80]	929.124	3	2785.36	2785.35	0	4.5	17	NRagged	280.94	280.94	114.05	5.91	1651	>sp|P02817|AMELX_BOVIN Amelogenin, X isoform OS=Bos taurus OX=9913 GN=AMELX PE=1 SV=2	1	hf1_10472_ebo_32_1_261219.ScanId;v=1;d1=21317.21317.3	controllerType=0 controllerNumber=1 scan=21317	44.1221
47490:3	1	S.M[+15.995]PLPPHPGHPGYINFS[+79.966]YEVLTPLK.W		M[+16], S[+80]	934.133	3	2800.38	2800.36	0	9.9	17	NRagged	286.73	286.73	17.01	5.4	1651	>sp|P02817|AMELX_BOVIN Amelogenin, X isoform OS=Bos taurus OX=9913 GN=AMELX PE=1 SV=2	1	hf1_10472_ebo_32_1_261219.ScanId;v=1;d1=34356.34356.3	controllerType=0 controllerNumber=1 scan=34356	68.831
47683:3	1	S.M[+15.995]PLPPHPGHPGYINFS[+79.966]YEVLTPLK.W		M[+16], S[+80]	934.126	3	2800.36	2800.36	0	2.6	17	NRagged	339.2	339.2	21.96	6.41	1651	>sp|P02817|AMELX_BOVIN Amelogenin, X isoform OS=Bos taurus OX=9913 GN=AMELX PE=1 SV=2	1	hf1_10472_ebo_32_1_261219.ScanId;v=1;d1=34515.34515.3	controllerType=0 controllerNumber=1 scan=34515	69.1709
30205:3	1	S.MP[+31.990]LPPHPGHPGYINFS[+79.966]YEVLTPLK.W		P[+32], S[+80]	939.455	3	2816.35	2816.35	0	-0.3	17	NRagged	349.79	349.79	1.8	5.59	1651	>sp|P02817|AMELX_BOVIN Amelogenin, X isoform OS=Bos taurus OX=9913 GN=AMELX PE=1 SV=2	1	hf1_10472_ebo_32_1_261219.ScanId;v=1;d1=22492.22492.3	controllerType=0 controllerNumber=1 scan=22492	46.1413
28387:4	1	S.M[+15.995]PLPPHPGHPGYIN[+0.984]FSYEVLTPLK.W		M[+16], N[+1]	681.101	4	2721.38	2721.37	0	3.2	17	NRagged	354.14	344.66	4.85	5.93	1651	>sp|P02817|AMELX_BOVIN Amelogenin, X isoform OS=Bos taurus OX=9913 GN=AMELX PE=1 SV=2	1	hf1_10472_ebo_32_1_261219.ScanId;v=1;d1=21283.21283.4	controllerType=0 controllerNumber=1 scan=21283	44.0642
33226:3	1	S.MPLPPH[+15.995]PGHPGYINFS[+79.966]YEVLTPLK.W		H[+16], S[+80]	934.126	3	2800.36	2800.36	0	2.3	17	NRagged	354.18	354.18	8.09	5.74	1651	>sp|P02817|AMELX_BOVIN Amelogenin, X isoform OS=Bos taurus OX=9913 GN=AMELX PE=1 SV=2	1	hf1_10472_ebo_32_1_261219.ScanId;v=1;d1=24459.24459.3	controllerType=0 controllerNumber=1 scan=24459	49.5605
01573:3	1	S.M[+15.995]PLPPHPGHPGYINFS[+79.966]YEVLTPLK.W		M[+16], S[+80]	934.126	3	2800.36	2800.36	0	1.9	17	NRagged	379.35	379.35	25.5	7.35	1651	>sp|P02817|AMELX_BOVIN Amelogenin, X isoform OS=Bos taurus OX=9913 GN=AMELX PE=1 SV=2	1	hf1_10472_ebo_32_1_261219.ScanId;v=1;d1=2796.2796.3	controllerType=0 controllerNumber=1 scan=2796	12.5013
00848:3	1	S.M[+15.995]PLPPHPGHPGYINFS[+79.966]YEVLTPLK.W		M[+16], S[+80]	934.127	3	2800.37	2800.36	0	3	17	NRagged	389.17	389.17	14.1	7.35	1651	>sp|P02817|AMELX_BOVIN Amelogenin, X isoform OS=Bos taurus OX=9913 GN=AMELX PE=1 SV=2	1	hf1_10472_ebo_32_1_261219.ScanId;v=1;d1=2270.2270.3	controllerType=0 controllerNumber=1 scan=2270	11.4599
27439:3	1	S.M[+15.995]PLPPHPGHPGYINFS[+79.966]YEVLTPLK.W		M[+16], S[+80]	934.133	3	2800.38	2800.36	0	9.7	17	NRagged	410.43	410.43	4.06	6.58	1651	>sp|P02817|AMELX_BOVIN Amelogenin, X isoform OS=Bos taurus OX=9913 GN=AMELX PE=1 SV=2	1	hf1_10472_ebo_32_1_261219.ScanId;v=1;d1=20642.20642.3	controllerType=0 controllerNumber=1 scan=20642	42.9789
47489:3	1	S.M[+15.995]PLPPHPGHPGYINFS[+79.966]YEVLTPLK.W		M[+16], S[+80]	934.133	3	2800.38	2800.36	0	9.9	17	NRagged	411.74	411.74	24.52	6.85	1651	>sp|P02817|AMELX_BOVIN Amelogenin, X isoform OS=Bos taurus OX=9913 GN=AMELX PE=1 SV=2	1	hf1_10472_ebo_32_1_261219.ScanId;v=1;d1=34355.34355.3	controllerType=0 controllerNumber=1 scan=34355	68.8282
01061:3	1	S.M[+15.995]PLPPHPGHPGYINFS[+79.966]YEVLTPLK.W		M[+16], S[+80]	934.125	3	2800.36	2800.36	0	1.8	17	NRagged	413.69	413.69	36.74	7.37	1651	>sp|P02817|AMELX_BOVIN Amelogenin, X isoform OS=Bos taurus OX=9913 GN=AMELX PE=1 SV=2	1	hf1_10472_ebo_32_1_261219.ScanId;v=1;d1=2424.2424.3	controllerType=0 controllerNumber=1 scan=2424	11.7963
01832:3	1	S.M[+15.995]PLPPHPGHPGYINFS[+79.966]YEVLTPLK.W		M[+16], S[+80]	934.127	3	2800.37	2800.36	0	3.5	17	NRagged	418.46	418.46	13.6	7.37	1651	>sp|P02817|AMELX_BOVIN Amelogenin, X isoform OS=Bos taurus OX=9913 GN=AMELX PE=1 SV=2	1	hf1_10472_ebo_32_1_261219.ScanId;v=1;d1=2984.2984.3	controllerType=0 controllerNumber=1 scan=2984	12.84
32140:3	1	S.MP[+15.995]LPPHPGHPGYINFS[+79.966]YEVLTPLK.W		P[+16], S[+80]	934.127	3	2800.37	2800.36	0	3.5	17	NRagged	419.69	419.69	5.8	7.09	1651	>sp|P02817|AMELX_BOVIN Amelogenin, X isoform OS=Bos taurus OX=9913 GN=AMELX PE=1 SV=2	1	hf1_10472_ebo_32_1_261219.ScanId;v=1;d1=23749.23749.3	controllerType=0 controllerNumber=1 scan=23749	48.3215
01313:3	1	S.M[+15.995]PLPPHPGHPGYINFS[+79.966]YEVLTPLK.W		M[+16], S[+80]	934.126	3	2800.36	2800.36	0	2	17	NRagged	421.67	421.67	12.14	7.37	1651	>sp|P02817|AMELX_BOVIN Amelogenin, X isoform OS=Bos taurus OX=9913 GN=AMELX PE=1 SV=2	1	hf1_10472_ebo_32_1_261219.ScanId;v=1;d1=2608.2608.3	controllerType=0 controllerNumber=1 scan=2608	12.1513
30607:4	1	S.MP[+15.995]LPPHPGHPGYINFS[+79.966]YEVLTPLK.W		P[+16], S[+80]	700.844	4	2800.36	2800.36	0	-0.6	17	NRagged	442.93	442.93	5.8	6.55	1651	>sp|P02817|AMELX_BOVIN Amelogenin, X isoform OS=Bos taurus OX=9913 GN=AMELX PE=1 SV=2	1	hf1_10472_ebo_32_1_261219.ScanId;v=1;d1=22753.22753.4	controllerType=0 controllerNumber=1 scan=22753	46.5964
27806:3	1	S.M[+15.995]PLPPHPGHPGYINFS[+79.966]YEVLTPLK.W		M[+16], S[+80]	934.127	3	2800.37	2800.36	0	3.4	17	NRagged	496.5	496.5	9.22	7.36	1651	>sp|P02817|AMELX_BOVIN Amelogenin, X isoform OS=Bos taurus OX=9913 GN=AMELX PE=1 SV=2	1	hf1_10472_ebo_32_1_261219.ScanId;v=1;d1=20891.20891.3	controllerType=0 controllerNumber=1 scan=20891	43.3987
29519:3	1	S.MP[+31.990]LPPHPGHPGYINFS[+79.966]YEVLTPLK.W		P[+32], S[+80]	939.459	3	2816.36	2816.35	0	3.7	17	NRagged	549.26	549.26	2.76	7.57	1651	>sp|P02817|AMELX_BOVIN Amelogenin, X isoform OS=Bos taurus OX=9913 GN=AMELX PE=1 SV=2	1	hf1_10472_ebo_32_1_261219.ScanId;v=1;d1=22032.22032.3	controllerType=0 controllerNumber=1 scan=22032	45.347
30865:3	1	S.MP[+15.995]LPPHPGHPGYINFS[+79.966]YEVLTPLK.W		P[+16], S[+80]	934.125	3	2800.36	2800.36	0	1.7	17	NRagged	572.83	572.83	5.8	7.83	1651	>sp|P02817|AMELX_BOVIN Amelogenin, X isoform OS=Bos taurus OX=9913 GN=AMELX PE=1 SV=2	1	hf1_10472_ebo_32_1_261219.ScanId;v=1;d1=22927.22927.3	controllerType=0 controllerNumber=1 scan=22927	46.8943
27779:4	1	S.MP[+15.995]LPPHPGHPGYIN[+0.984]FSYEVLTPLK.W		N[+1], P[+16]	681.103	4	2721.39	2721.37	0	6	17	NRagged	579.27	579.27	5.8	8.86	1651	>sp|P02817|AMELX_BOVIN Amelogenin, X isoform OS=Bos taurus OX=9913 GN=AMELX PE=1 SV=2	1	hf1_10472_ebo_32_1_261219.ScanId;v=1;d1=20871.20871.4	controllerType=0 controllerNumber=1 scan=20871	43.366
30000:4	1	S.MPLPP[+15.995]HPGHPGYINFS[+79.966]YEVLTPLK.W		P[+16], S[+80]	700.848	4	2800.37	2800.36	0	5.3	17	NRagged	583.87	583.87	0	8.86	1651	>sp|P02817|AMELX_BOVIN Amelogenin, X isoform OS=Bos taurus OX=9913 GN=AMELX PE=1 SV=2	1	hf1_10472_ebo_32_1_261219.ScanId;v=1;d1=22356.22356.4	controllerType=0 controllerNumber=1 scan=22356	45.9082
29694:4	1	S.MPLPP[+15.995]HPGHPGYINFS[+79.966]YEVLTPLK.W		P[+16], S[+80]	700.847	4	2800.37	2800.36	0	4	17	NRagged	605.67	605.67	2.21	9.58	1651	>sp|P02817|AMELX_BOVIN Amelogenin, X isoform OS=Bos taurus OX=9913 GN=AMELX PE=1 SV=2	1	hf1_10472_ebo_32_1_261219.ScanId;v=1;d1=22148.22148.4	controllerType=0 controllerNumber=1 scan=22148	45.5495
28827:2	1	S.M[+15.995]PLPPHPGHPGYINFS[+79.966]YEVLTPLK.W		M[+16], S[+80]	1400.7	2	2800.38	2800.36	0	9.5	17	NRagged	606.24	606.24	35.14	8.65	1651	>sp|P02817|AMELX_BOVIN Amelogenin, X isoform OS=Bos taurus OX=9913 GN=AMELX PE=1 SV=2	1	hf1_10472_ebo_32_1_261219.ScanId;v=1;d1=21575.21575.2	controllerType=0 controllerNumber=1 scan=21575	44.5619
30569:3	1	S.M[+15.995]PLPPHPGHPGYINFS[+79.966]YEVLTPLK.W		M[+16], S[+80]	934.127	3	2800.37	2800.36	0	3.3	17	NRagged	630.3	630.3	6.78	9.34	1651	>sp|P02817|AMELX_BOVIN Amelogenin, X isoform OS=Bos taurus OX=9913 GN=AMELX PE=1 SV=2	1	hf1_10472_ebo_32_1_261219.ScanId;v=1;d1=22729.22729.3	controllerType=0 controllerNumber=1 scan=22729	46.555
50022:4	1	S.MP[+15.995]LPPHPGHPGYINFS[+79.966]YEVLTPLK.W		P[+16], S[+80]	700.85	4	2800.38	2800.36	0	8.2	17	NRagged	678.23	678.23	5.8	10.65	1651	>sp|P02817|AMELX_BOVIN Amelogenin, X isoform OS=Bos taurus OX=9913 GN=AMELX PE=1 SV=2	1	hf1_10472_ebo_32_1_261219.ScanId;v=1;d1=36440.36440.4	controllerType=0 controllerNumber=1 scan=36440	73.532
28158:4	1	S.MP[+15.995]LPPHPGHPGYINFS[+79.966]YEVLTPLK.W		P[+16], S[+80]	700.847	4	2800.37	2800.36	0	3.4	17	NRagged	684.34	684.34	5.8	10.58	1651	>sp|P02817|AMELX_BOVIN Amelogenin, X isoform OS=Bos taurus OX=9913 GN=AMELX PE=1 SV=2	1	hf1_10472_ebo_32_1_261219.ScanId;v=1;d1=21130.21130.4	controllerType=0 controllerNumber=1 scan=21130	43.8022
30814:4	1	S.MPLPPHPGHPGYIN[+0.984]FS[+79.966]YEVLTPLK.W		N[+1], S[+80]	697.096	4	2785.36	2785.35	0	6	17	NRagged	695.75	695.75	374.84	10.86	1651	>sp|P02817|AMELX_BOVIN Amelogenin, X isoform OS=Bos taurus OX=9913 GN=AMELX PE=1 SV=2	1	hf1_10472_ebo_32_1_261219.ScanId;v=1;d1=22894.22894.4	controllerType=0 controllerNumber=1 scan=22894	46.8382
29072:4	1	S.MP[+15.995]LPPHPGHPGYINFS[+79.966]YEVLTPLK.W		P[+16], S[+80]	700.847	4	2800.37	2800.36	0	3.5	17	NRagged	706.3	706.3	5.8	11.58	1651	>sp|P02817|AMELX_BOVIN Amelogenin, X isoform OS=Bos taurus OX=9913 GN=AMELX PE=1 SV=2	1	hf1_10472_ebo_32_1_261219.ScanId;v=1;d1=21741.21741.4	controllerType=0 controllerNumber=1 scan=21741	44.8498
31122:4	1	S.MPLPPHPGHPGYIN[+0.984]FS[+79.966]YEVLTPLK.W		N[+1], S[+80]	697.096	4	2785.36	2785.35	0	5.6	17	NRagged	726.52	726.52	393.09	11.86	1651	>sp|P02817|AMELX_BOVIN Amelogenin, X isoform OS=Bos taurus OX=9913 GN=AMELX PE=1 SV=2	1	hf1_10472_ebo_32_1_261219.ScanId;v=1;d1=23092.23092.4	controllerType=0 controllerNumber=1 scan=23092	47.1811
27874:3	1	S.M[+15.995]PLPPHPGHPGYIN[+0.984]FSYEVLTPLK.W		M[+16], N[+1]	907.802	3	2721.39	2721.37	0	6.6	17	NRagged	735.34	698.67	31.95	12.08	1651	>sp|P02817|AMELX_BOVIN Amelogenin, X isoform OS=Bos taurus OX=9913 GN=AMELX PE=1 SV=2	1	hf1_10472_ebo_32_1_261219.ScanId;v=1;d1=20937.20937.3	controllerType=0 controllerNumber=1 scan=20937	43.4751
28459:4	1	S.M[+15.995]PLPPHPGHPGYINFS[+79.966]YEVLTPLK.W		M[+16], S[+80]	700.848	4	2800.37	2800.36	0	5.5	17	NRagged	738.65	738.65	7.25	11.86	1651	>sp|P02817|AMELX_BOVIN Amelogenin, X isoform OS=Bos taurus OX=9913 GN=AMELX PE=1 SV=2	1	hf1_10472_ebo_32_1_261219.ScanId;v=1;d1=21330.21330.4	controllerType=0 controllerNumber=1 scan=21330	44.1467
30268:3	1	S.MPLPPHPGH[+15.995]PGYINFS[+79.966]YEVLTPLK.W		H[+16], S[+80]	934.126	3	2800.36	2800.36	0	2	17	NRagged	759.93	759.93	10.76	12.34	1651	>sp|P02817|AMELX_BOVIN Amelogenin, X isoform OS=Bos taurus OX=9913 GN=AMELX PE=1 SV=2	1	hf1_10472_ebo_32_1_261219.ScanId;v=1;d1=22531.22531.3	controllerType=0 controllerNumber=1 scan=22531	46.211
28763:4	1	S.M[+15.995]PLPPHPGHPGYINFS[+79.966]YEVLTPLK.W		M[+16], S[+80]	700.848	4	2800.37	2800.36	0	5.5	17	NRagged	767.34	767.34	7.47	12.86	1651	>sp|P02817|AMELX_BOVIN Amelogenin, X isoform OS=Bos taurus OX=9913 GN=AMELX PE=1 SV=2	1	hf1_10472_ebo_32_1_261219.ScanId;v=1;d1=21533.21533.4	controllerType=0 controllerNumber=1 scan=21533	44.4921
28511:2	1	S.M[+15.995]PLPPHPGHPGYINFS[+79.966]YEVLTPLK.W		M[+16], S[+80]	1400.7	2	2800.38	2800.36	0	9.4	17	NRagged	774.69	774.69	16.6	11.65	1651	>sp|P02817|AMELX_BOVIN Amelogenin, X isoform OS=Bos taurus OX=9913 GN=AMELX PE=1 SV=2	1	hf1_10472_ebo_32_1_261219.ScanId;v=1;d1=21367.21367.2	controllerType=0 controllerNumber=1 scan=21367	44.2067
28118:3	1	S.M[+15.995]PLPPHPGHPGYINFS[+79.966]YEVLTPLK.W		M[+16], S[+80]	934.124	3	2800.36	2800.36	0	0.2	17	NRagged	790.1	790.1	25.46	12.34	1651	>sp|P02817|AMELX_BOVIN Amelogenin, X isoform OS=Bos taurus OX=9913 GN=AMELX PE=1 SV=2	1	hf1_10472_ebo_32_1_261219.ScanId;v=1;d1=21102.21102.3	controllerType=0 controllerNumber=1 scan=21102	43.7533
29970:3	1	S.M[+15.995]PLPPHPGHPGYINFS[+79.966]YEVLTPLK.W		M[+16], S[+80]	934.128	3	2800.37	2800.36	0	3.9	17	NRagged	808.79	808.79	15.66	13.8	1651	>sp|P02817|AMELX_BOVIN Amelogenin, X isoform OS=Bos taurus OX=9913 GN=AMELX PE=1 SV=2	1	hf1_10472_ebo_32_1_261219.ScanId;v=1;d1=22334.22334.3	controllerType=0 controllerNumber=1 scan=22334	45.8698
29374:3	1	S.MP[+31.990]LPPHPGHPGYINFS[+79.966]YEVLTPLK.W		P[+32], S[+80]	939.459	3	2816.36	2816.35	0	4	17	NRagged	847.53	847.53	0.75	13.8	1651	>sp|P02817|AMELX_BOVIN Amelogenin, X isoform OS=Bos taurus OX=9913 GN=AMELX PE=1 SV=2	1	hf1_10472_ebo_32_1_261219.ScanId;v=1;d1=21937.21937.3	controllerType=0 controllerNumber=1 scan=21937	45.1853
31551:3	1	S.MPLPPHPGHPGYIN[+0.984]FS[+79.966]YEVLTPLK.W		N[+1], S[+80]	929.127	3	2785.37	2785.35	0	7	17	NRagged	904.76	904.76	450.87	15.86	1651	>sp|P02817|AMELX_BOVIN Amelogenin, X isoform OS=Bos taurus OX=9913 GN=AMELX PE=1 SV=2	1	hf1_10472_ebo_32_1_261219.ScanId;v=1;d1=23368.23368.3	controllerType=0 controllerNumber=1 scan=23368	47.6602
29660:3	1	S.M[+15.995]PLPPHPGHPGYINFS[+79.966]YEVLTPLK.W		M[+16], S[+80]	934.126	3	2800.36	2800.36	0	2.1	17	NRagged	918.6	918.6	29.91	15.34	1651	>sp|P02817|AMELX_BOVIN Amelogenin, X isoform OS=Bos taurus OX=9913 GN=AMELX PE=1 SV=2	1	hf1_10472_ebo_32_1_261219.ScanId;v=1;d1=22126.22126.3	controllerType=0 controllerNumber=1 scan=22126	45.5117
50016:3	1	S.M[+15.995]PLPPHPGHPGYINFS[+79.966]YEVLTPLK.W		M[+16], S[+80]	934.131	3	2800.38	2800.36	0	8.2	17	NRagged	945.42	945.42	28.66	15.86	1651	>sp|P02817|AMELX_BOVIN Amelogenin, X isoform OS=Bos taurus OX=9913 GN=AMELX PE=1 SV=2	1	hf1_10472_ebo_32_1_261219.ScanId;v=1;d1=36436.36436.3	controllerType=0 controllerNumber=1 scan=36436	73.5259
29040:3	1	S.M[+15.995]PLPPHPGHPGYINFS[+79.966]YEVLTPLK.W		M[+16], S[+80]	934.128	3	2800.37	2800.36	0	5	17	NRagged	948.31	948.31	40.05	16.08	1651	>sp|P02817|AMELX_BOVIN Amelogenin, X isoform OS=Bos taurus OX=9913 GN=AMELX PE=1 SV=2	1	hf1_10472_ebo_32_1_261219.ScanId;v=1;d1=21718.21718.3	controllerType=0 controllerNumber=1 scan=21718	44.8124
31240:3	1	S.MPLPPHPGHPGYIN[+0.984]FS[+79.966]YEVLTPLK.W		N[+1], S[+80]	929.126	3	2785.36	2785.35	0	6.4	17	NRagged	986.86	986.86	427.44	17.08	1651	>sp|P02817|AMELX_BOVIN Amelogenin, X isoform OS=Bos taurus OX=9913 GN=AMELX PE=1 SV=2	1	hf1_10472_ebo_32_1_261219.ScanId;v=1;d1=23170.23170.3	controllerType=0 controllerNumber=1 scan=23170	47.3158
30624:3	1	S.MPLPPHPGHPGYIN[+0.984]FS[+79.966]YEVLTPLK.W		N[+1], S[+80]	929.128	3	2785.37	2785.35	0	8.8	17	NRagged	1070.62	1070.62	465.73	18.86	1651	>sp|P02817|AMELX_BOVIN Amelogenin, X isoform OS=Bos taurus OX=9913 GN=AMELX PE=1 SV=2	1	hf1_10472_ebo_32_1_261219.ScanId;v=1;d1=22763.22763.3	controllerType=0 controllerNumber=1 scan=22763	46.6134
28426:3	1	S.M[+15.995]PLPPHPGHPGYINFS[+79.966]YEVLTPLK.W		M[+16], S[+80]	934.128	3	2800.37	2800.36	0	4.9	17	NRagged	1088.87	1088.87	46.27	19.08	1651	>sp|P02817|AMELX_BOVIN Amelogenin, X isoform OS=Bos taurus OX=9913 GN=AMELX PE=1 SV=2	1	hf1_10472_ebo_32_1_261219.ScanId;v=1;d1=21308.21308.3	controllerType=0 controllerNumber=1 scan=21308	44.109
28738:3	1	S.M[+15.995]PLPPHPGHPGYINFS[+79.966]YEVLTPLK.W		M[+16], S[+80]	934.129	3	2800.37	2800.36	0	5.6	17	NRagged	1129.99	1129.99	53.99	20.08	1651	>sp|P02817|AMELX_BOVIN Amelogenin, X isoform OS=Bos taurus OX=9913 GN=AMELX PE=1 SV=2	1	hf1_10472_ebo_32_1_261219.ScanId;v=1;d1=21517.21517.3	controllerType=0 controllerNumber=1 scan=21517	44.4631
30931:3	1	S.MPLPPHPGHPGYIN[+0.984]FS[+79.966]YEVLTPLK.W		N[+1], S[+80]	929.125	3	2785.36	2785.35	0	5.2	17	NRagged	1172.11	1172.11	565.48	21.08	1651	>sp|P02817|AMELX_BOVIN Amelogenin, X isoform OS=Bos taurus OX=9913 GN=AMELX PE=1 SV=2	1	hf1_10472_ebo_32_1_261219.ScanId;v=1;d1=22971.22971.3	controllerType=0 controllerNumber=1 scan=22971	46.9697
47245:3	1	S.MP[+15.995]LPPHPGHPGYIN[+0.984]FS[+79.966]YEVLTPLK.W		N[+1], P[+16], S[+80]	934.458	3	2801.36	2801.34	0	6.7	17	NRagged	26.42	26.42	4	2.73	1651	>sp|P02817|AMELX_BOVIN Amelogenin, X isoform OS=Bos taurus OX=9913 GN=AMELX PE=1 SV=2	1	hf1_10472_ebo_32_1_261219.ScanId;v=1;d1=34157.34157.3	controllerType=0 controllerNumber=1 scan=34157	68.3983
49460:4	1	S.MPLP[+15.995]PHPGHP[+31.990]GYINF[+31.990]SYEVLTPLK.W		F[+32], P[+16][+32]	696.849	4	2784.38	2784.37	0	2.1	17	NRagged	27.08	27.08	0	2.29	1651	>sp|P02817|AMELX_BOVIN Amelogenin, X isoform OS=Bos taurus OX=9913 GN=AMELX PE=1 SV=2	1	hf1_10472_ebo_32_1_261219.ScanId;v=1;d1=35974.35974.4	controllerType=0 controllerNumber=1 scan=35974	72.4335
47701:4	1	S.MP[+15.995]LPPHPGHP[+31.990]GYINF[+31.990]SYEVLTPLK.W		F[+32], P[+16][+32]	696.849	4	2784.37	2784.37	0	1.1	17	NRagged	61.08	61.08	0	2.33	1651	>sp|P02817|AMELX_BOVIN Amelogenin, X isoform OS=Bos taurus OX=9913 GN=AMELX PE=1 SV=2	1	hf1_10472_ebo_32_1_261219.ScanId;v=1;d1=34531.34531.4	controllerType=0 controllerNumber=1 scan=34531	69.2054
01170:4	1	S.MPLP[+31.990]P[+31.990]HPGHPGYINF[+15.995]SYEVLTPLK.W		F[+16], P[+32]*2	696.848	4	2784.37	2784.37	0	-0.5	17	NRagged	84.69	84.69	0	2.3	1651	>sp|P02817|AMELX_BOVIN Amelogenin, X isoform OS=Bos taurus OX=9913 GN=AMELX PE=1 SV=2	1	hf1_10472_ebo_32_1_261219.ScanId;v=1;d1=2505.2505.4	controllerType=0 controllerNumber=1 scan=2505	11.9551
48664:4	1	S.MPLP[+15.995]PHPGHPGY[+31.990]INF[+31.990]SYEVLTPLK.W		F[+32], P[+16], Y[+32]	696.847	4	2784.37	2784.37	0	-1.4	17	NRagged	85.19	85.19	0	2.36	1651	>sp|P02817|AMELX_BOVIN Amelogenin, X isoform OS=Bos taurus OX=9913 GN=AMELX PE=1 SV=2	1	hf1_10472_ebo_32_1_261219.ScanId;v=1;d1=35329.35329.4	controllerType=0 controllerNumber=1 scan=35329	70.9751
46957:3	1	S.MP[+15.995]LPPHPGHPGYIN[+0.984]FS[+79.966]YEVLTPLK.W		N[+1], P[+16], S[+80]	934.459	3	2801.36	2801.34	0	8	17	NRagged	87.89	87.89	4	2.71	1651	>sp|P02817|AMELX_BOVIN Amelogenin, X isoform OS=Bos taurus OX=9913 GN=AMELX PE=1 SV=2	1	hf1_10472_ebo_32_1_261219.ScanId;v=1;d1=33882.33882.3	controllerType=0 controllerNumber=1 scan=33882	67.7093
47092:4	1	S.MPLP[+15.995]PHPGHPGY[+31.990]INF[+31.990]SYEVLTPLK.W		F[+32], P[+16], Y[+32]	696.849	4	2784.37	2784.37	0	1.5	17	NRagged	93.03	93.03	0	2.32	1651	>sp|P02817|AMELX_BOVIN Amelogenin, X isoform OS=Bos taurus OX=9913 GN=AMELX PE=1 SV=2	1	hf1_10472_ebo_32_1_261219.ScanId;v=1;d1=34017.34017.4	controllerType=0 controllerNumber=1 scan=34017	68.0599
49364:3	1	S.M[+15.995]PLPPHPGHPGYIN[+0.984]FS[+79.966]YEVLTPLK.W		M[+16], N[+1], S[+80]	934.461	3	2801.37	2801.34	0	9.4	17	NRagged	108.95	108.95	10.85	2.56	1651	>sp|P02817|AMELX_BOVIN Amelogenin, X isoform OS=Bos taurus OX=9913 GN=AMELX PE=1 SV=2	1	hf1_10472_ebo_32_1_261219.ScanId;v=1;d1=35890.35890.3	controllerType=0 controllerNumber=1 scan=35890	72.2377
47882:4	1	S.MPLP[+15.995]PHPGHPGY[+31.990]INF[+31.990]SYEVLTPLK.W		F[+32], P[+16], Y[+32]	696.847	4	2784.37	2784.37	0	-1	17	NRagged	112.82	112.82	0	2.3	1651	>sp|P02817|AMELX_BOVIN Amelogenin, X isoform OS=Bos taurus OX=9913 GN=AMELX PE=1 SV=2	1	hf1_10472_ebo_32_1_261219.ScanId;v=1;d1=34680.34680.4	controllerType=0 controllerNumber=1 scan=34680	69.5521
49151:4	1	S.MPLP[+15.995]PHPGHPGY[+31.990]INF[+31.990]SYEVLTPLK.W		F[+32], P[+16], Y[+32]	696.849	4	2784.38	2784.37	0	1.9	17	NRagged	113.32	113.32	0	2.32	1651	>sp|P02817|AMELX_BOVIN Amelogenin, X isoform OS=Bos taurus OX=9913 GN=AMELX PE=1 SV=2	1	hf1_10472_ebo_32_1_261219.ScanId;v=1;d1=35716.35716.4	controllerType=0 controllerNumber=1 scan=35716	71.8347
47492:4	1	S.MPLPPHPGHP[+15.995]GY[+31.990]INF[+31.990]SYEVLTPLK.W		F[+32], P[+16], Y[+32]	696.845	4	2784.36	2784.37	0	-4.1	17	NRagged	114.18	114.18	0	2.3	1651	>sp|P02817|AMELX_BOVIN Amelogenin, X isoform OS=Bos taurus OX=9913 GN=AMELX PE=1 SV=2	1	hf1_10472_ebo_32_1_261219.ScanId;v=1;d1=34358.34358.4	controllerType=0 controllerNumber=1 scan=34358	68.834
00898:3	1	S.MPLPPHPGHP[+31.990]GY[+31.990]INF[+15.995]SYEVLTPLK.W		F[+16], P[+32], Y[+32]	928.795	3	2784.37	2784.37	0	-0.1	17	NRagged	122.47	122.47	0	2.91	1651	>sp|P02817|AMELX_BOVIN Amelogenin, X isoform OS=Bos taurus OX=9913 GN=AMELX PE=1 SV=2	1	hf1_10472_ebo_32_1_261219.ScanId;v=1;d1=2308.2308.3	controllerType=0 controllerNumber=1 scan=2308	11.5392
00803:4	1	S.MPLPPHPGHP[+15.995]GY[+31.990]INF[+31.990]SYEVLTPLK.W		F[+32], P[+16], Y[+32]	696.848	4	2784.37	2784.37	0	0.2	17	NRagged	135.6	135.6	0	2.67	1651	>sp|P02817|AMELX_BOVIN Amelogenin, X isoform OS=Bos taurus OX=9913 GN=AMELX PE=1 SV=2	1	hf1_10472_ebo_32_1_261219.ScanId;v=1;d1=2240.2240.4	controllerType=0 controllerNumber=1 scan=2240	11.4005
01433:4	1	S.MPLP[+15.995]PHPGHPGY[+31.990]INF[+31.990]SYEVLTPLK.W		F[+32], P[+16], Y[+32]	696.849	4	2784.37	2784.37	0	1.3	17	NRagged	135.93	135.93	0	2.47	1651	>sp|P02817|AMELX_BOVIN Amelogenin, X isoform OS=Bos taurus OX=9913 GN=AMELX PE=1 SV=2	1	hf1_10472_ebo_32_1_261219.ScanId;v=1;d1=2695.2695.4	controllerType=0 controllerNumber=1 scan=2695	12.3162
33849:3	1	S.MPLPPHPGHP[+15.995]GYINF[+31.990]SY[+31.990]EVLTPLK.W		F[+32], P[+16], Y[+32]	928.797	3	2784.37	2784.37	0	1.7	17	NRagged	140.01	140.01	2.51	2.33	1651	>sp|P02817|AMELX_BOVIN Amelogenin, X isoform OS=Bos taurus OX=9913 GN=AMELX PE=1 SV=2	1	hf1_10472_ebo_32_1_261219.ScanId;v=1;d1=24865.24865.3	controllerType=0 controllerNumber=1 scan=24865	50.2662
27479:4	1	S.MP[+15.995]LPPHPGHPGYINFS[+79.966]Y[+15.995]EVLTPLK.W		P[+16], S[+80], Y[+16]	704.846	4	2816.36	2816.35	0	3.3	17	NRagged	150.3	150.3	5.77	2.37	1651	>sp|P02817|AMELX_BOVIN Amelogenin, X isoform OS=Bos taurus OX=9913 GN=AMELX PE=1 SV=2	1	hf1_10472_ebo_32_1_261219.ScanId;v=1;d1=20671.20671.4	controllerType=0 controllerNumber=1 scan=20671	43.0298
29051:4	1	S.MPLP[+31.990]PHPGHPGYIN[+0.984]FS[+79.966]YEVLTPLK.W		N[+1], P[+32], S[+80]	705.095	4	2817.36	2817.34	0	8	17	NRagged	154.04	154.04	2.02	2.39	1651	>sp|P02817|AMELX_BOVIN Amelogenin, X isoform OS=Bos taurus OX=9913 GN=AMELX PE=1 SV=2	1	hf1_10472_ebo_32_1_261219.ScanId;v=1;d1=21724.21724.4	controllerType=0 controllerNumber=1 scan=21724	44.8201
47754:3	1	S.M[+15.995]PLPPHPGHPGYIN[+0.984]FS[+79.966]YEVLTPLK.W		M[+16], N[+1], S[+80]	934.457	3	2801.36	2801.34	0	5.4	17	NRagged	165.91	165.91	15.04	4.33	1651	>sp|P02817|AMELX_BOVIN Amelogenin, X isoform OS=Bos taurus OX=9913 GN=AMELX PE=1 SV=2	1	hf1_10472_ebo_32_1_261219.ScanId;v=1;d1=34571.34571.3	controllerType=0 controllerNumber=1 scan=34571	69.2963
26629:3	1	S.M[+15.995]PLPPHPGHPGYINF[+15.995]S[+79.966]YEVLTPLK.W		F[+16], M[+16], S[+80]	939.462	3	2816.37	2816.35	0	7.3	17	NRagged	178.86	178.86	0	3.06	1651	>sp|P02817|AMELX_BOVIN Amelogenin, X isoform OS=Bos taurus OX=9913 GN=AMELX PE=1 SV=2	1	hf1_10472_ebo_32_1_261219.ScanId;v=1;d1=20102.20102.4	controllerType=0 controllerNumber=1 scan=20102	42.0607
47289:3	1	S.M[+15.995]PLPPHPGHPGYIN[+0.984]FS[+79.966]YEVLTPLK.W		M[+16], N[+1], S[+80]	934.459	3	2801.36	2801.34	0	7.8	17	NRagged	190.57	190.57	17.83	4.11	1651	>sp|P02817|AMELX_BOVIN Amelogenin, X isoform OS=Bos taurus OX=9913 GN=AMELX PE=1 SV=2	1	hf1_10472_ebo_32_1_261219.ScanId;v=1;d1=34193.34193.3	controllerType=0 controllerNumber=1 scan=34193	68.4872
27138:3	1	S.M[+15.995]PLPPHPGHPGY[+15.995]INFS[+79.966]YEVLTPLK.W		M[+16], S[+80], Y[+16]	939.461	3	2816.37	2816.35	0	6.2	17	NRagged	287.75	287.75	1.36	6.14	1651	>sp|P02817|AMELX_BOVIN Amelogenin, X isoform OS=Bos taurus OX=9913 GN=AMELX PE=1 SV=2	1	hf1_10472_ebo_32_1_261219.ScanId;v=1;d1=20444.20444.3	controllerType=0 controllerNumber=1 scan=20444	42.6417
26285:3	1	S.M[+15.995]PLPPHPGHP[+15.995]GYINFS[+79.966]YEVLTPLK.W		M[+16], P[+16], S[+80]	939.461	3	2816.37	2816.35	0	5.9	17	NRagged	301.84	301.84	5.32	6.19	1651	>sp|P02817|AMELX_BOVIN Amelogenin, X isoform OS=Bos taurus OX=9913 GN=AMELX PE=1 SV=2	1	hf1_10472_ebo_32_1_261219.ScanId;v=1;d1=19879.19879.3	controllerType=0 controllerNumber=1 scan=19879	41.69
29719:4	1	S.MP[+31.990]LPPHPGHPGYIN[+0.984]FS[+79.966]YEVLTPLK.W		N[+1], P[+32], S[+80]	705.094	4	2817.35	2817.34	0	6	17	NRagged	303.55	303.55	10.57	5.97	1651	>sp|P02817|AMELX_BOVIN Amelogenin, X isoform OS=Bos taurus OX=9913 GN=AMELX PE=1 SV=2	1	hf1_10472_ebo_32_1_261219.ScanId;v=1;d1=22164.22164.4	controllerType=0 controllerNumber=1 scan=22164	45.5742
31284:3	1	S.M[+15.995]PLPPHP[+15.995]GHPGYINFS[+79.966]YEVLTPLK.W		M[+16], P[+16], S[+80]	939.462	3	2816.37	2816.35	0	6.7	17	NRagged	345.51	345.51	1.34	6.69	1651	>sp|P02817|AMELX_BOVIN Amelogenin, X isoform OS=Bos taurus OX=9913 GN=AMELX PE=1 SV=2	1	hf1_10472_ebo_32_1_261219.ScanId;v=1;d1=23199.23199.3	controllerType=0 controllerNumber=1 scan=23199	47.3646
28967:4	1	S.MP[+31.990]LPPHPGHPGYIN[+0.984]FS[+79.966]YEVLTPLK.W		N[+1], P[+32], S[+80]	705.096	4	2817.36	2817.34	0	9.5	17	NRagged	361.92	361.92	1.8	6.61	1651	>sp|P02817|AMELX_BOVIN Amelogenin, X isoform OS=Bos taurus OX=9913 GN=AMELX PE=1 SV=2	1	hf1_10472_ebo_32_1_261219.ScanId;v=1;d1=21669.21669.4	controllerType=0 controllerNumber=1 scan=21669	44.7277
25426:3	1	S.M[+15.995]PLPPHPGHPGYINFS[+79.966]Y[+15.995]EVLTPLK.W		M[+16], S[+80], Y[+16]	939.461	3	2816.37	2816.35	0	6	17	NRagged	377.98	377.98	6.89	7.3	1651	>sp|P02817|AMELX_BOVIN Amelogenin, X isoform OS=Bos taurus OX=9913 GN=AMELX PE=1 SV=2	1	hf1_10472_ebo_32_1_261219.ScanId;v=1;d1=19306.19306.3	controllerType=0 controllerNumber=1 scan=19306	40.7091
28275:4	1	S.M[+15.995]PLPPH[+15.995]PGHPGYINFS[+79.966]YEVLTPLK.W		H[+16], M[+16], S[+80]	704.846	4	2816.36	2816.35	0	3.7	17	NRagged	394.62	394.62	3.05	7.08	1651	>sp|P02817|AMELX_BOVIN Amelogenin, X isoform OS=Bos taurus OX=9913 GN=AMELX PE=1 SV=2	1	hf1_10472_ebo_32_1_261219.ScanId;v=1;d1=21210.21210.4	controllerType=0 controllerNumber=1 scan=21210	43.9391
28705:3	1	S.M[+31.990]PLPPHPGHPGYIN[+0.984]FS[+79.966]YEVLTPLK.W		M[+32], N[+1], S[+80]	939.791	3	2817.36	2817.34	0	7.8	17	NRagged	435.92	435.92	0	7.1	1651	>sp|P02817|AMELX_BOVIN Amelogenin, X isoform OS=Bos taurus OX=9913 GN=AMELX PE=1 SV=2	1	hf1_10472_ebo_32_1_261219.ScanId;v=1;d1=21496.21496.3	controllerType=0 controllerNumber=1 scan=21496	44.4269
30608:4	1	S.MPLPPHPGH[+15.995]PGYIN[+0.984]FS[+79.966]YEVLTPLK.W		H[+16], N[+1], S[+80]	701.096	4	2801.36	2801.34	0	7	17	NRagged	452.4	409.63	18.44	6.95	1651	>sp|P02817|AMELX_BOVIN Amelogenin, X isoform OS=Bos taurus OX=9913 GN=AMELX PE=1 SV=2	1	hf1_10472_ebo_32_1_261219.ScanId;v=1;d1=22753.22753.4	controllerType=0 controllerNumber=1 scan=22753	46.5964
31056:3	1	S.MP[+15.995]LPPHP[+15.995]GHPGYINFS[+79.966]YEVLTPLK.W		P[+16]*2, S[+80]	939.46	3	2816.36	2816.35	0	4.5	17	NRagged	469.79	469.79	0.12	7.43	1651	>sp|P02817|AMELX_BOVIN Amelogenin, X isoform OS=Bos taurus OX=9913 GN=AMELX PE=1 SV=2	1	hf1_10472_ebo_32_1_261219.ScanId;v=1;d1=23051.23051.3	controllerType=0 controllerNumber=1 scan=23051	47.1082
30866:3	1	S.MP[+15.995]LPPHPGHPGYIN[+0.984]FS[+79.966]YEVLTPLK.W		N[+1], P[+16], S[+80]	934.459	3	2801.36	2801.34	0	7.7	17	NRagged	514.36	487.11	5.8	7.47	1651	>sp|P02817|AMELX_BOVIN Amelogenin, X isoform OS=Bos taurus OX=9913 GN=AMELX PE=1 SV=2	1	hf1_10472_ebo_32_1_261219.ScanId;v=1;d1=22927.22927.3	controllerType=0 controllerNumber=1 scan=22927	46.8943
27968:4	1	S.MP[+15.995]LPPHPGHP[+15.995]GYINFS[+79.966]YEVLTPLK.W		P[+16]*2, S[+80]	704.847	4	2816.37	2816.35	0	5.2	17	NRagged	561.07	561.07	2.72	8.86	1651	>sp|P02817|AMELX_BOVIN Amelogenin, X isoform OS=Bos taurus OX=9913 GN=AMELX PE=1 SV=2	1	hf1_10472_ebo_32_1_261219.ScanId;v=1;d1=21002.21002.4	controllerType=0 controllerNumber=1 scan=21002	43.5836
30304:4	1	S.MPLPPHPGHPGY[+15.995]IN[+0.984]FS[+79.966]YEVLTPLK.W		N[+1], S[+80], Y[+16]	701.095	4	2801.36	2801.34	0	5.7	17	NRagged	571.5	551.47	3.87	8.86	1651	>sp|P02817|AMELX_BOVIN Amelogenin, X isoform OS=Bos taurus OX=9913 GN=AMELX PE=1 SV=2	1	hf1_10472_ebo_32_1_261219.ScanId;v=1;d1=22553.22553.4	controllerType=0 controllerNumber=1 scan=22553	46.2495
30099:3	1	S.MP[+31.990]LPPHPGHPGYIN[+0.984]FS[+79.966]YEVLTPLK.W		N[+1], P[+32], S[+80]	939.791	3	2817.36	2817.34	0	8.2	17	NRagged	601.71	550.97	10.97	9.41	1651	>sp|P02817|AMELX_BOVIN Amelogenin, X isoform OS=Bos taurus OX=9913 GN=AMELX PE=1 SV=2	1	hf1_10472_ebo_32_1_261219.ScanId;v=1;d1=22422.22422.3	controllerType=0 controllerNumber=1 scan=22422	46.0214
28704:3	1	S.M[+15.995]PLPP[+15.995]HPGHPGYINFS[+79.966]YEVLTPLK.W		M[+16], P[+16], S[+80]	939.458	3	2816.36	2816.35	0	2.4	17	NRagged	607.33	607.33	3.97	9.34	1651	>sp|P02817|AMELX_BOVIN Amelogenin, X isoform OS=Bos taurus OX=9913 GN=AMELX PE=1 SV=2	1	hf1_10472_ebo_32_1_261219.ScanId;v=1;d1=21496.21496.3	controllerType=0 controllerNumber=1 scan=21496	44.4269
30570:3	1	S.MPLPPHPGHP[+15.995]GYIN[+0.984]FS[+79.966]YEVLTPLK.W		N[+1], P[+16], S[+80]	934.459	3	2801.36	2801.34	0	7.8	17	NRagged	631.9	585.52	0.71	9.86	1651	>sp|P02817|AMELX_BOVIN Amelogenin, X isoform OS=Bos taurus OX=9913 GN=AMELX PE=1 SV=2	1	hf1_10472_ebo_32_1_261219.ScanId;v=1;d1=22729.22729.3	controllerType=0 controllerNumber=1 scan=22729	46.555
29695:4	1	S.MP[+15.995]LPPHPGHPGYIN[+0.984]FS[+79.966]YEVLTPLK.W		N[+1], P[+16], S[+80]	701.096	4	2801.36	2801.34	0	7.8	17	NRagged	639.69	587.11	5.8	9.65	1651	>sp|P02817|AMELX_BOVIN Amelogenin, X isoform OS=Bos taurus OX=9913 GN=AMELX PE=1 SV=2	1	hf1_10472_ebo_32_1_261219.ScanId;v=1;d1=22148.22148.4	controllerType=0 controllerNumber=1 scan=22148	45.5495
29801:3	1	S.MP[+31.990]LPPHPGHPGYIN[+0.984]FS[+79.966]YEVLTPLK.W		N[+1], P[+32], S[+80]	939.79	3	2817.36	2817.34	0	7.3	17	NRagged	653.52	611.13	1.8	10.41	1651	>sp|P02817|AMELX_BOVIN Amelogenin, X isoform OS=Bos taurus OX=9913 GN=AMELX PE=1 SV=2	1	hf1_10472_ebo_32_1_261219.ScanId;v=1;d1=22220.22220.3	controllerType=0 controllerNumber=1 scan=22220	45.67
29394:4	1	S.M[+15.995]PLPPHPGHPGYIN[+0.984]FS[+79.966]YEVLTPLK.W		M[+16], N[+1], S[+80]	701.095	4	2801.36	2801.34	0	6.7	17	NRagged	734.73	734.73	5.46	11.86	1651	>sp|P02817|AMELX_BOVIN Amelogenin, X isoform OS=Bos taurus OX=9913 GN=AMELX PE=1 SV=2	1	hf1_10472_ebo_32_1_261219.ScanId;v=1;d1=21948.21948.4	controllerType=0 controllerNumber=1 scan=21948	45.2046
29073:4	1	S.MP[+15.995]LPPHPGHPGYIN[+0.984]FS[+79.966]YEVLTPLK.W		N[+1], P[+16], S[+80]	701.097	4	2801.36	2801.34	0	8.6	17	NRagged	751.92	715.84	5.8	12.65	1651	>sp|P02817|AMELX_BOVIN Amelogenin, X isoform OS=Bos taurus OX=9913 GN=AMELX PE=1 SV=2	1	hf1_10472_ebo_32_1_261219.ScanId;v=1;d1=21741.21741.4	controllerType=0 controllerNumber=1 scan=21741	44.8498
30269:3	1	S.MPLPPHPGHP[+15.995]GYIN[+0.984]FS[+79.966]YEVLTPLK.W		N[+1], P[+16], S[+80]	934.458	3	2801.36	2801.34	0	6.8	17	NRagged	814.43	760.59	2.92	14.08	1651	>sp|P02817|AMELX_BOVIN Amelogenin, X isoform OS=Bos taurus OX=9913 GN=AMELX PE=1 SV=2	1	hf1_10472_ebo_32_1_261219.ScanId;v=1;d1=22531.22531.3	controllerType=0 controllerNumber=1 scan=22531	46.211
29064:3	1	S.M[+15.995]P[+15.995]LPPHPGHPGYINFS[+79.966]YEVLTPLK.W		M[+16], P[+16], S[+80]	939.459	3	2816.36	2816.35	0	4	17	NRagged	819.48	819.48	0.95	13.8	1651	>sp|P02817|AMELX_BOVIN Amelogenin, X isoform OS=Bos taurus OX=9913 GN=AMELX PE=1 SV=2	1	hf1_10472_ebo_32_1_261219.ScanId;v=1;d1=21734.21734.3	controllerType=0 controllerNumber=1 scan=21734	44.8374
28398:3	1	S.M[+15.995]PLPPH[+15.995]PGHPGYINFS[+79.966]YEVLTPLK.W		H[+16], M[+16], S[+80]	939.458	3	2816.36	2816.35	0	3	17	NRagged	849.48	849.48	5.47	13.8	1651	>sp|P02817|AMELX_BOVIN Amelogenin, X isoform OS=Bos taurus OX=9913 GN=AMELX PE=1 SV=2	1	hf1_10472_ebo_32_1_261219.ScanId;v=1;d1=21290.21290.3	controllerType=0 controllerNumber=1 scan=21290	44.0768
28119:3	1	S.M[+15.995]PLPPHPGHPGYIN[+0.984]FS[+79.966]YEVLTPLK.W		M[+16], N[+1], S[+80]	934.459	3	2801.36	2801.34	0	7.3	17	NRagged	874.89	841.08	15.96	14.86	1651	>sp|P02817|AMELX_BOVIN Amelogenin, X isoform OS=Bos taurus OX=9913 GN=AMELX PE=1 SV=2	1	hf1_10472_ebo_32_1_261219.ScanId;v=1;d1=21102.21102.3	controllerType=0 controllerNumber=1 scan=21102	43.7533
28093:3	1	S.M[+15.995]PLPPHP[+15.995]GHPGYINFS[+79.966]YEVLTPLK.W		M[+16], P[+16], S[+80]	939.459	3	2816.36	2816.35	0	4.3	17	NRagged	885.51	885.51	2.89	14.8	1651	>sp|P02817|AMELX_BOVIN Amelogenin, X isoform OS=Bos taurus OX=9913 GN=AMELX PE=1 SV=2	1	hf1_10472_ebo_32_1_261219.ScanId;v=1;d1=21086.21086.3	controllerType=0 controllerNumber=1 scan=21086	43.7283
27785:3	1	S.M[+15.995]PLPPHP[+15.995]GHPGYINFS[+79.966]YEVLTPLK.W		M[+16], P[+16], S[+80]	939.46	3	2816.37	2816.35	0	5.2	17	NRagged	892.39	892.39	2.64	15.08	1651	>sp|P02817|AMELX_BOVIN Amelogenin, X isoform OS=Bos taurus OX=9913 GN=AMELX PE=1 SV=2	1	hf1_10472_ebo_32_1_261219.ScanId;v=1;d1=20877.20877.3	controllerType=0 controllerNumber=1 scan=20877	43.3777
29661:3	1	S.M[+15.995]PLPPHPGHPGYIN[+0.984]FS[+79.966]YEVLTPLK.W		M[+16], N[+1], S[+80]	934.46	3	2801.36	2801.34	0	8.3	17	NRagged	1049.87	1037.24	51.64	17.86	1651	>sp|P02817|AMELX_BOVIN Amelogenin, X isoform OS=Bos taurus OX=9913 GN=AMELX PE=1 SV=2	1	hf1_10472_ebo_32_1_261219.ScanId;v=1;d1=22126.22126.3	controllerType=0 controllerNumber=1 scan=22126	45.5117
29358:3	1	S.M[+15.995]PLPPHPGHPGYIN[+0.984]FS[+79.966]YEVLTPLK.W		M[+16], N[+1], S[+80]	934.458	3	2801.36	2801.34	0	6.2	17	NRagged	1113.21	1110	46.39	20.08	1651	>sp|P02817|AMELX_BOVIN Amelogenin, X isoform OS=Bos taurus OX=9913 GN=AMELX PE=1 SV=2	1	hf1_10472_ebo_32_1_261219.ScanId;v=1;d1=21926.21926.3	controllerType=0 controllerNumber=1 scan=21926	45.1669
00477:3	1	S.MP[+15.995]LPPHPGHP[+31.990]GYINF[+31.990]SY[+15.995]EVLTPLK.W		F[+32], P[+16][+32], Y[+16]	934.127	3	2800.37	2800.37	0	0.1	17	NRagged	1.68	1.68	0	2.46	1651	>sp|P02817|AMELX_BOVIN Amelogenin, X isoform OS=Bos taurus OX=9913 GN=AMELX PE=1 SV=2	1	hf1_10472_ebo_32_1_261219.ScanId;v=1;d1=1704.1704.3	controllerType=0 controllerNumber=1 scan=1704	9.0765
49502:3	1	S.MPLPPHPGHP[+31.990]GYIN[+0.984]F[+31.990]SY[+15.995]EVLTPLK.W		F[+32], N[+1], P[+32], Y[+16]	929.131	3	2785.38	2785.35	0	8.5	17	NRagged	9.12	9.12	0	2.43	1651	>sp|P02817|AMELX_BOVIN Amelogenin, X isoform OS=Bos taurus OX=9913 GN=AMELX PE=1 SV=2	1	hf1_10472_ebo_32_1_261219.ScanId;v=1;d1=36011.36011.3	controllerType=0 controllerNumber=1 scan=36011	72.5333
47252:4	1	S.MPLP[+15.995]PHPGHPGY[+31.990]IN[+0.984]F[+31.990]SYEVLTPLK.W		F[+32], N[+1], P[+16], Y[+32]	697.1	4	2785.38	2785.35	0	9	17	NRagged	9.5	9.5	0	2.37	1651	>sp|P02817|AMELX_BOVIN Amelogenin, X isoform OS=Bos taurus OX=9913 GN=AMELX PE=1 SV=2	1	hf1_10472_ebo_32_1_261219.ScanId;v=1;d1=34161.34161.4	controllerType=0 controllerNumber=1 scan=34161	68.4071
48635:3	1	S.MPLPPHPGHP[+15.995]GY[+31.990]IN[+0.984]F[+31.990]SYEVLTPLK.W		F[+32], N[+1], P[+16], Y[+32]	929.132	3	2785.38	2785.35	0	9.8	17	NRagged	15.17	15.17	3.5	2.31	1651	>sp|P02817|AMELX_BOVIN Amelogenin, X isoform OS=Bos taurus OX=9913 GN=AMELX PE=1 SV=2	1	hf1_10472_ebo_32_1_261219.ScanId;v=1;d1=35305.35305.3	controllerType=0 controllerNumber=1 scan=35305	70.9152
49396:4	1	S.MPLPPHPGHP[+31.990]GY[+31.990]IN[+0.984]F[+15.995]SYEVLTPLK.W		F[+16], N[+1], P[+32], Y[+32]	697.099	4	2785.37	2785.35	0	7.1	17	NRagged	22.78	22.78	2	2.37	1651	>sp|P02817|AMELX_BOVIN Amelogenin, X isoform OS=Bos taurus OX=9913 GN=AMELX PE=1 SV=2	1	hf1_10472_ebo_32_1_261219.ScanId;v=1;d1=35915.35915.4	controllerType=0 controllerNumber=1 scan=35915	72.2954
46859:3	1	S.M[+15.995]PLPPHPGHP[+31.990]GYINF[+31.990]SY[+15.995]EVLTPLK.W		F[+32], M[+16], P[+32], Y[+16]	934.128	3	2800.37	2800.37	0	2	17	NRagged	51.28	51.28	0	2.49	1651	>sp|P02817|AMELX_BOVIN Amelogenin, X isoform OS=Bos taurus OX=9913 GN=AMELX PE=1 SV=2	1	hf1_10472_ebo_32_1_261219.ScanId;v=1;d1=33784.33784.3	controllerType=0 controllerNumber=1 scan=33784	67.4253
48124:4	1	S.MPLP[+15.995]PHPGHPGY[+31.990]IN[+0.984]F[+31.990]SYEVLTPLK.W		F[+32], N[+1], P[+16], Y[+32]	697.099	4	2785.38	2785.35	0	7.7	17	NRagged	51.3	51.3	0	2.46	1651	>sp|P02817|AMELX_BOVIN Amelogenin, X isoform OS=Bos taurus OX=9913 GN=AMELX PE=1 SV=2	1	hf1_10472_ebo_32_1_261219.ScanId;v=1;d1=34879.34879.4	controllerType=0 controllerNumber=1 scan=34879	69.9854
01669:3	1	S.MPLPPHPGHPGY[+31.990]IN[+0.984]F[+31.990]SY[+15.995]EVLTPLK.W		F[+32], N[+1], Y[+16][+32]	929.127	3	2785.37	2785.35	0	4.2	17	NRagged	51.99	51.99	0	2.71	1651	>sp|P02817|AMELX_BOVIN Amelogenin, X isoform OS=Bos taurus OX=9913 GN=AMELX PE=1 SV=2	1	hf1_10472_ebo_32_1_261219.ScanId;v=1;d1=2866.2866.3	controllerType=0 controllerNumber=1 scan=2866	12.6282
01171:4	1	S.MPLP[+31.990]P[+31.990]HPGHPGYIN[+0.984]F[+15.995]SYEVLTPLK.W		F[+16], N[+1], P[+32]*2	697.098	4	2785.37	2785.35	0	6.2	17	NRagged	56.76	56.76	0	2.32	1651	>sp|P02817|AMELX_BOVIN Amelogenin, X isoform OS=Bos taurus OX=9913 GN=AMELX PE=1 SV=2	1	hf1_10472_ebo_32_1_261219.ScanId;v=1;d1=2505.2505.4	controllerType=0 controllerNumber=1 scan=2505	11.9551
48867:4	1	S.MPLPPH[+15.995]PGHPGY[+31.990]IN[+0.984]F[+31.990]SYEVLTPLK.W		F[+32], H[+16], N[+1], Y[+32]	697.099	4	2785.38	2785.35	0	7.5	17	NRagged	58.04	58.04	0	2.46	1651	>sp|P02817|AMELX_BOVIN Amelogenin, X isoform OS=Bos taurus OX=9913 GN=AMELX PE=1 SV=2	1	hf1_10472_ebo_32_1_261219.ScanId;v=1;d1=35490.35490.4	controllerType=0 controllerNumber=1 scan=35490	71.3458
47444:4	1	S.MPLP[+31.990]PHPGH[+15.995]PGYIN[+0.984]F[+31.990]SYEVLTPLK.W		F[+32], H[+16], N[+1], P[+32]	697.1	4	2785.38	2785.35	0	7.9	17	NRagged	99	99	0	2.44	1651	>sp|P02817|AMELX_BOVIN Amelogenin, X isoform OS=Bos taurus OX=9913 GN=AMELX PE=1 SV=2	1	hf1_10472_ebo_32_1_261219.ScanId;v=1;d1=34317.34317.2	controllerType=0 controllerNumber=1 scan=34317	68.7478
49084:3	1	S.MPLPPHPGHP[+15.995]GYIN[+0.984]F[+31.990]SY[+31.990]EVLTPLK.W		F[+32], N[+1], P[+16], Y[+32]	929.131	3	2785.38	2785.35	0	8.9	17	NRagged	105.24	105.24	0	2.52	1651	>sp|P02817|AMELX_BOVIN Amelogenin, X isoform OS=Bos taurus OX=9913 GN=AMELX PE=1 SV=2	1	hf1_10472_ebo_32_1_261219.ScanId;v=1;d1=35666.35666.3	controllerType=0 controllerNumber=1 scan=35666	71.7188
48299:3	1	S.MP[+15.995]LPPHPGHP[+31.990]GYINF[+31.990]SY[+15.995]EVLTPLK.W		F[+32], P[+16][+32], Y[+16]	934.126	3	2800.36	2800.37	0	-0.3	17	NRagged	112.04	112.04	1.23	2.41	1651	>sp|P02817|AMELX_BOVIN Amelogenin, X isoform OS=Bos taurus OX=9913 GN=AMELX PE=1 SV=2	1	hf1_10472_ebo_32_1_261219.ScanId;v=1;d1=35029.35029.3	controllerType=0 controllerNumber=1 scan=35029	70.3
47657:3	1	S.MPLPPHPGHPGY[+15.995]IN[+0.984]F[+31.990]SY[+31.990]EVLTPLK.W		F[+32], N[+1], Y[+16][+32]	929.131	3	2785.38	2785.35	0	8.5	17	NRagged	136.19	136.19	0	3.24	1651	>sp|P02817|AMELX_BOVIN Amelogenin, X isoform OS=Bos taurus OX=9913 GN=AMELX PE=1 SV=2	1	hf1_10472_ebo_32_1_261219.ScanId;v=1;d1=34491.34491.3	controllerType=0 controllerNumber=1 scan=34491	69.1114
01341:4	1	S.MP[+15.995]LPPHP[+31.990]GH[+15.995]PGYINF[+31.990]SYEVLTPLK.W		F[+32], H[+16], P[+16][+32]	700.847	4	2800.37	2800.37	0	0.1	17	NRagged	175.54	175.54	2	3.45	1651	>sp|P02817|AMELX_BOVIN Amelogenin, X isoform OS=Bos taurus OX=9913 GN=AMELX PE=1 SV=2	1	hf1_10472_ebo_32_1_261219.ScanId;v=1;d1=2628.2628.4	controllerType=0 controllerNumber=1 scan=2628	12.187
01093:4	1	S.MP[+15.995]LPPHPGHP[+31.990]GYINF[+31.990]SY[+15.995]EVLTPLK.W		F[+32], P[+16][+32], Y[+16]	700.846	4	2800.36	2800.37	0	-0.5	17	NRagged	189.25	189.25	0	3.52	1651	>sp|P02817|AMELX_BOVIN Amelogenin, X isoform OS=Bos taurus OX=9913 GN=AMELX PE=1 SV=2	1	hf1_10472_ebo_32_1_261219.ScanId;v=1;d1=2450.2450.4	controllerType=0 controllerNumber=1 scan=2450	11.8494
00874:4	1	S.MP[+15.995]LPPHP[+15.995]GHPGYINF[+31.990]SY[+31.990]EVLTPLK.W		F[+32], P[+16]*2, Y[+32]	700.846	4	2800.36	2800.37	0	-0.6	17	NRagged	200.01	200.01	0	3.52	1651	>sp|P02817|AMELX_BOVIN Amelogenin, X isoform OS=Bos taurus OX=9913 GN=AMELX PE=1 SV=2	1	hf1_10472_ebo_32_1_261219.ScanId;v=1;d1=2291.2291.4	controllerType=0 controllerNumber=1 scan=2291	11.5001
31963:4	1	S.MPLP[+15.995]PHPGHPGY[+31.990]IN[+0.984]F[+31.990]SYEVLTPLK.W		F[+32], N[+1], P[+16], Y[+32]	697.1	4	2785.38	2785.35	0	9	17	NRagged	210.88	210.88	3.02	3.19	1651	>sp|P02817|AMELX_BOVIN Amelogenin, X isoform OS=Bos taurus OX=9913 GN=AMELX PE=1 SV=2	1	hf1_10472_ebo_32_1_261219.ScanId;v=1;d1=23637.23637.6	controllerType=0 controllerNumber=1 scan=23637	48.1255
28706:5	1	S.MP[+15.995]LPPHPGHPGY[+31.990]INF[+15.995]SY[+31.990]EVLTPLK.W		F[+16], P[+16], Y[+32]*2	560.88	5	2800.37	2800.37	0	2.7	17	NRagged	212.04	212.04	0	3.34	1651	>sp|P02817|AMELX_BOVIN Amelogenin, X isoform OS=Bos taurus OX=9913 GN=AMELX PE=1 SV=2	1	hf1_10472_ebo_32_1_261219.ScanId;v=1;d1=21497.21497.5	controllerType=0 controllerNumber=1 scan=21497	44.4283
31637:4	1	S.MPLPPHPGHPGY[+15.995]IN[+0.984]F[+31.990]SY[+31.990]EVLTPLK.W		F[+32], N[+1], Y[+16][+32]	697.101	4	2785.38	2785.35	0	9.4	17	NRagged	278.17	278.17	0.36	4.58	1651	>sp|P02817|AMELX_BOVIN Amelogenin, X isoform OS=Bos taurus OX=9913 GN=AMELX PE=1 SV=2	1	hf1_10472_ebo_32_1_261219.ScanId;v=1;d1=23429.23429.6	controllerType=0 controllerNumber=1 scan=23429	47.7639
31428:4	1	S.MPLPPHP[+31.990]GHPGY[+15.995]IN[+0.984]F[+31.990]SYEVLTPLK.W		F[+32], N[+1], P[+32], Y[+16]	697.1	4	2785.38	2785.35	0	8.8	17	NRagged	281.38	281.38	0	5.76	1651	>sp|P02817|AMELX_BOVIN Amelogenin, X isoform OS=Bos taurus OX=9913 GN=AMELX PE=1 SV=2	1	hf1_10472_ebo_32_1_261219.ScanId;v=1;d1=23292.23292.4	controllerType=0 controllerNumber=1 scan=23292	47.5274
31860:3	1	S.MPLPPHPGHP[+31.990]GY[+15.995]IN[+0.984]F[+31.990]SYEVLTPLK.W		F[+32], N[+1], P[+32], Y[+16]	929.131	3	2785.38	2785.35	0	9.2	17	NRagged	351.13	351.13	3.23	6.25	1651	>sp|P02817|AMELX_BOVIN Amelogenin, X isoform OS=Bos taurus OX=9913 GN=AMELX PE=1 SV=2	1	hf1_10472_ebo_32_1_261219.ScanId;v=1;d1=23571.23571.3	controllerType=0 controllerNumber=1 scan=23571	48.0105
32577:4	1	S.MPLPPHPGHPGYINFSYEVLTPLKW.Y			723.375	4	2890.48	2890.47	0	1.8	17	Non	114.41	114.41	114.41	1.46	1651	>sp|P02817|AMELX_BOVIN Amelogenin, X isoform OS=Bos taurus OX=9913 GN=AMELX PE=1 SV=2	1	hf1_10472_ebo_32_1_261219.ScanId;v=1;d1=24036.24036.4	controllerType=0 controllerNumber=1 scan=24036	48.822
33202:4	1	S.MP[+15.995]LPPHPGHPGYINFSYEVLTPLKW.Y		P[+16]	727.371	4	2906.46	2906.47	0	-2.3	17	Non	215.15	215.15	5.8	3.45	1651	>sp|P02817|AMELX_BOVIN Amelogenin, X isoform OS=Bos taurus OX=9913 GN=AMELX PE=1 SV=2	1	hf1_10472_ebo_32_1_261219.ScanId;v=1;d1=24444.24444.4	controllerType=0 controllerNumber=1 scan=24444	49.5352
33232:4	1	S.MP[+15.995]LPPHPGHPGYINFSYEVLTPLKW.Y		P[+16]	727.372	4	2906.47	2906.47	0	-1	17	Non	234.74	234.74	5.8	3.45	1651	>sp|P02817|AMELX_BOVIN Amelogenin, X isoform OS=Bos taurus OX=9913 GN=AMELX PE=1 SV=2	1	hf1_10472_ebo_32_1_261219.ScanId;v=1;d1=24463.24463.3	controllerType=0 controllerNumber=1 scan=24463	49.5693
34519:4	1	S.MPLPPHPGHPGYIN[+0.984]FSYEVLTPLKW.Y		N[+1]	723.624	4	2891.47	2891.46	0	5.5	17	Non	250.76	250.76	250.76	5.87	1651	>sp|P02817|AMELX_BOVIN Amelogenin, X isoform OS=Bos taurus OX=9913 GN=AMELX PE=1 SV=2	1	hf1_10472_ebo_32_1_261219.ScanId;v=1;d1=25319.25319.4	controllerType=0 controllerNumber=1 scan=25319	51.0582
36075:4	1	S.MPLPPHPGHPGYINFS[+79.966]YEVLTPLKW.Y		S[+80]	743.368	4	2970.45	2970.44	0	3.4	17	Non	267.94	267.94	58.01	5.59	1651	>sp|P02817|AMELX_BOVIN Amelogenin, X isoform OS=Bos taurus OX=9913 GN=AMELX PE=1 SV=2	1	hf1_10472_ebo_32_1_261219.ScanId;v=1;d1=26362.26362.4	controllerType=0 controllerNumber=1 scan=26362	52.9041
32242:4	1	S.MP[+15.995]LPPHPGHPGYINFSYEVLTPLKW.Y		P[+16]	727.377	4	2906.49	2906.47	0	5.8	17	Non	286.34	286.34	5.8	6.14	1651	>sp|P02817|AMELX_BOVIN Amelogenin, X isoform OS=Bos taurus OX=9913 GN=AMELX PE=1 SV=2	1	hf1_10472_ebo_32_1_261219.ScanId;v=1;d1=23816.23816.4	controllerType=0 controllerNumber=1 scan=23816	48.4385
35193:4	1	S.MPLPPHPGHPGYINFS[+79.966]YEVLTPLKW.Y		S[+80]	743.369	4	2970.46	2970.44	0	4.7	17	Non	298.39	298.39	90.9	6.14	1651	>sp|P02817|AMELX_BOVIN Amelogenin, X isoform OS=Bos taurus OX=9913 GN=AMELX PE=1 SV=2	1	hf1_10472_ebo_32_1_261219.ScanId;v=1;d1=25771.25771.4	controllerType=0 controllerNumber=1 scan=25771	51.8561
36371:4	1	S.MPLPPHPGHPGYINFS[+79.966]YEVLTPLKW.Y		S[+80]	743.366	4	2970.44	2970.44	0	0	17	Non	327.05	327.05	22.86	5.69	1651	>sp|P02817|AMELX_BOVIN Amelogenin, X isoform OS=Bos taurus OX=9913 GN=AMELX PE=1 SV=2	1	hf1_10472_ebo_32_1_261219.ScanId;v=1;d1=26562.26562.4	controllerType=0 controllerNumber=1 scan=26562	53.2596
35481:4	1	S.MPLPPHPGHPGYINFS[+79.966]YEVLTPLKW.Y		S[+80]	743.37	4	2970.46	2970.44	0	6.2	17	Non	422.12	422.12	176.97	7.54	1651	>sp|P02817|AMELX_BOVIN Amelogenin, X isoform OS=Bos taurus OX=9913 GN=AMELX PE=1 SV=2	1	hf1_10472_ebo_32_1_261219.ScanId;v=1;d1=25967.25967.4	controllerType=0 controllerNumber=1 scan=25967	52.2045
35769:4	1	S.MPLPPHPGHPGYINFS[+79.966]YEVLTPLKW.Y		S[+80]	743.371	4	2970.46	2970.44	0	6.8	17	Non	514.13	514.13	227.96	7.64	1651	>sp|P02817|AMELX_BOVIN Amelogenin, X isoform OS=Bos taurus OX=9913 GN=AMELX PE=1 SV=2	1	hf1_10472_ebo_32_1_261219.ScanId;v=1;d1=26161.26161.4	controllerType=0 controllerNumber=1 scan=26161	52.5477
35200:3	1	S.MPLPPHPGHPGYINFS[+79.966]YEVLTPLKW.Y		S[+80]	990.823	3	2970.46	2970.44	0	5	17	Non	555.24	555.24	193.26	8.01	1651	>sp|P02817|AMELX_BOVIN Amelogenin, X isoform OS=Bos taurus OX=9913 GN=AMELX PE=1 SV=2	1	hf1_10472_ebo_32_1_261219.ScanId;v=1;d1=25776.25776.3	controllerType=0 controllerNumber=1 scan=25776	51.8663
36212:3	1	S.MPLPPHPGHPGYINFS[+79.966]YEVLTPLKW.Y		S[+80]	990.818	3	2970.44	2970.44	0	-0.8	17	Non	819.88	819.88	332.42	13.36	1651	>sp|P02817|AMELX_BOVIN Amelogenin, X isoform OS=Bos taurus OX=9913 GN=AMELX PE=1 SV=2	1	hf1_10472_ebo_32_1_261219.ScanId;v=1;d1=26454.26454.3	controllerType=0 controllerNumber=1 scan=26454	53.0674
35496:3	1	S.MPLPPHPGHPGYINFS[+79.966]YEVLTPLKW.Y		S[+80]	990.825	3	2970.46	2970.44	0	6.2	17	Non	941.44	941.44	468.4	16.24	1651	>sp|P02817|AMELX_BOVIN Amelogenin, X isoform OS=Bos taurus OX=9913 GN=AMELX PE=1 SV=2	1	hf1_10472_ebo_32_1_261219.ScanId;v=1;d1=25977.25977.3	controllerType=0 controllerNumber=1 scan=25977	52.222
35785:3	1	S.MPLPPHPGHPGYINFS[+79.966]YEVLTPLKW.Y		S[+80]	990.825	3	2970.46	2970.44	0	6.1	17	Non	974.35	974.35	488.55	17.24	1651	>sp|P02817|AMELX_BOVIN Amelogenin, X isoform OS=Bos taurus OX=9913 GN=AMELX PE=1 SV=2	1	hf1_10472_ebo_32_1_261219.ScanId;v=1;d1=26171.26171.3	controllerType=0 controllerNumber=1 scan=26171	52.5655
31307:4	1	S.MP[+15.995]LPPHPGHPGYINFS[+79.966]YEVLTPLKW.Y		P[+16], S[+80]	747.37	4	2986.46	2986.44	0	7.6	17	Non	153.74	153.74	10.48	2.44	1651	>sp|P02817|AMELX_BOVIN Amelogenin, X isoform OS=Bos taurus OX=9913 GN=AMELX PE=1 SV=2	1	hf1_10472_ebo_32_1_261219.ScanId;v=1;d1=23215.23215.4	controllerType=0 controllerNumber=1 scan=23215	47.3943
33266:4	1	S.MP[+15.995]LPPHPGHPGYINFS[+79.966]YEVLTPLKW.Y		P[+16], S[+80]	747.372	4	2986.46	2986.44	0	9.6	17	Non	155.4	155.4	2.36	2.32	1651	>sp|P02817|AMELX_BOVIN Amelogenin, X isoform OS=Bos taurus OX=9913 GN=AMELX PE=1 SV=2	1	hf1_10472_ebo_32_1_261219.ScanId;v=1;d1=24485.24485.4	controllerType=0 controllerNumber=1 scan=24485	49.6081
36372:4	1	S.MPLPPHPGHPGYIN[+0.984]FS[+79.966]YEVLTPLKW.Y		N[+1], S[+80]	743.616	4	2971.44	2971.43	0	6.1	17	Non	316.5	316.5	122.68	6.14	1651	>sp|P02817|AMELX_BOVIN Amelogenin, X isoform OS=Bos taurus OX=9913 GN=AMELX PE=1 SV=2	1	hf1_10472_ebo_32_1_261219.ScanId;v=1;d1=26562.26562.4	controllerType=0 controllerNumber=1 scan=26562	53.2596
36676:4	1	S.MPLPPHPGHPGYIN[+0.984]FS[+79.966]YEVLTPLKW.Y		N[+1], S[+80]	743.616	4	2971.44	2971.43	0	6.3	17	Non	318.21	318.21	87.53	6.14	1651	>sp|P02817|AMELX_BOVIN Amelogenin, X isoform OS=Bos taurus OX=9913 GN=AMELX PE=1 SV=2	1	hf1_10472_ebo_32_1_261219.ScanId;v=1;d1=26758.26758.4	controllerType=0 controllerNumber=1 scan=26758	53.6028
34453:4	1	S.MP[+15.995]LPPHPGHPGYINFS[+79.966]YEVLTPLKW.Y		P[+16], S[+80]	747.37	4	2986.46	2986.44	0	6.7	17	Non	335.61	335.61	15.06	6.37	1651	>sp|P02817|AMELX_BOVIN Amelogenin, X isoform OS=Bos taurus OX=9913 GN=AMELX PE=1 SV=2	1	hf1_10472_ebo_32_1_261219.ScanId;v=1;d1=25277.25277.4	controllerType=0 controllerNumber=1 scan=25277	50.984
33859:4	1	S.MP[+15.995]LPPHPGHPGYINFS[+79.966]YEVLTPLKW.Y		P[+16], S[+80]	747.367	4	2986.45	2986.44	0	3.7	17	Non	338.92	338.92	16.78	6.14	1651	>sp|P02817|AMELX_BOVIN Amelogenin, X isoform OS=Bos taurus OX=9913 GN=AMELX PE=1 SV=2	1	hf1_10472_ebo_32_1_261219.ScanId;v=1;d1=24872.24872.4	controllerType=0 controllerNumber=1 scan=24872	50.2792
36428:3	1	S.MPLPPHPGHPGYIN[+0.984]FS[+79.966]YEVLTPLKW.Y		N[+1], S[+80]	991.154	3	2971.45	2971.43	0	7.3	17	Non	408.17	408.17	170.96	7.27	1651	>sp|P02817|AMELX_BOVIN Amelogenin, X isoform OS=Bos taurus OX=9913 GN=AMELX PE=1 SV=2	1	hf1_10472_ebo_32_1_261219.ScanId;v=1;d1=26600.26600.2	controllerType=0 controllerNumber=1 scan=26600	53.3245
36890:3	1	S.MPLPPHPGHPGYIN[+0.984]FS[+79.966]YEVLTPLKW.Y		N[+1], S[+80]	991.152	3	2971.44	2971.43	0	5.7	17	Non	432.26	432.26	146.46	7.53	1651	>sp|P02817|AMELX_BOVIN Amelogenin, X isoform OS=Bos taurus OX=9913 GN=AMELX PE=1 SV=2	1	hf1_10472_ebo_32_1_261219.ScanId;v=1;d1=26895.26895.5	controllerType=0 controllerNumber=1 scan=26895	53.843
34160:4	1	S.MP[+15.995]LPPHPGHPGYINFS[+79.966]YEVLTPLKW.Y		P[+16], S[+80]	747.368	4	2986.45	2986.44	0	5	17	Non	490.83	490.83	14.63	7.64	1651	>sp|P02817|AMELX_BOVIN Amelogenin, X isoform OS=Bos taurus OX=9913 GN=AMELX PE=1 SV=2	1	hf1_10472_ebo_32_1_261219.ScanId;v=1;d1=25077.25077.4	controllerType=0 controllerNumber=1 scan=25077	50.6345
33856:3	1	S.M[+15.995]PLPPHPGHPGYINFS[+79.966]YEVLTPLKW.Y		M[+16], S[+80]	996.158	3	2986.46	2986.44	0	8	17	Non	666.48	666.48	18.94	11.03	1651	>sp|P02817|AMELX_BOVIN Amelogenin, X isoform OS=Bos taurus OX=9913 GN=AMELX PE=1 SV=2	1	hf1_10472_ebo_32_1_261219.ScanId;v=1;d1=24870.24870.3	controllerType=0 controllerNumber=1 scan=24870	50.2762
34456:3	1	S.M[+15.995]PLPPHPGHPGYINFS[+79.966]YEVLTPLKW.Y		M[+16], S[+80]	996.157	3	2986.46	2986.44	0	6.7	17	Non	788.45	788.45	19.97	13.24	1651	>sp|P02817|AMELX_BOVIN Amelogenin, X isoform OS=Bos taurus OX=9913 GN=AMELX PE=1 SV=2	1	hf1_10472_ebo_32_1_261219.ScanId;v=1;d1=25279.25279.3	controllerType=0 controllerNumber=1 scan=25279	50.9867
36213:3	1	S.MPLPPHPGHPGYIN[+0.984]FS[+79.966]YEVLTPLKW.Y		N[+1], S[+80]	991.154	3	2971.45	2971.43	0	7	17	Non	840.5	840.5	404.13	14.03	1651	>sp|P02817|AMELX_BOVIN Amelogenin, X isoform OS=Bos taurus OX=9913 GN=AMELX PE=1 SV=2	1	hf1_10472_ebo_32_1_261219.ScanId;v=1;d1=26454.26454.3	controllerType=0 controllerNumber=1 scan=26454	53.0674
34159:3	1	S.M[+15.995]PLPPHPGHPGYINFS[+79.966]YEVLTPLKW.Y		M[+16], S[+80]	996.156	3	2986.45	2986.44	0	5.6	17	Non	908.25	908.25	24.6	16.24	1651	>sp|P02817|AMELX_BOVIN Amelogenin, X isoform OS=Bos taurus OX=9913 GN=AMELX PE=1 SV=2	1	hf1_10472_ebo_32_1_261219.ScanId;v=1;d1=25076.25076.3	controllerType=0 controllerNumber=1 scan=25076	50.6335
36499:3	1	S.MPLPPHPGHPGYIN[+0.984]FS[+79.966]YEVLTPLKW.Y		N[+1], S[+80]	991.154	3	2971.45	2971.43	0	7.2	17	Non	918.2	918.2	444.24	16.03	1651	>sp|P02817|AMELX_BOVIN Amelogenin, X isoform OS=Bos taurus OX=9913 GN=AMELX PE=1 SV=2	1	hf1_10472_ebo_32_1_261219.ScanId;v=1;d1=26648.26648.3	controllerType=0 controllerNumber=1 scan=26648	53.4111
31611:3	1	S.MP[+15.995]LPPHPGHPGYINFS[+79.966]YEVLTPLKW[+15.995].Y		P[+16], S[+80], W[+16]	1001.49	3	3002.45	3002.43	0	4.7	17	Non	81.38	37.15	5.8	2.3	1651	>sp|P02817|AMELX_BOVIN Amelogenin, X isoform OS=Bos taurus OX=9913 GN=AMELX PE=1 SV=2	1	hf1_10472_ebo_32_1_261219.ScanId;v=1;d1=23409.23409.3	controllerType=0 controllerNumber=1 scan=23409	47.7292
32223:4	1	S.MP[+15.995]LPPHPGHPGYINFS[+79.966]YEVLTPLKW[+15.995].Y		P[+16], S[+80], W[+16]	751.367	4	3002.45	3002.43	0	4.9	17	Non	139.28	102.71	5.2	2.34	1651	>sp|P02817|AMELX_BOVIN Amelogenin, X isoform OS=Bos taurus OX=9913 GN=AMELX PE=1 SV=2	1	hf1_10472_ebo_32_1_261219.ScanId;v=1;d1=23803.23803.4	controllerType=0 controllerNumber=1 scan=23803	48.416
49986:3	1	S.MPLPPHPGHP[+15.995]GY[+31.990]INF[+31.990]SYEVLTPLKW.Y		F[+32], P[+16], Y[+32]	990.829	3	2970.47	2970.45	0	8	17	Non	181.79	181.79	0	4.32	1651	>sp|P02817|AMELX_BOVIN Amelogenin, X isoform OS=Bos taurus OX=9913 GN=AMELX PE=1 SV=2	1	hf1_10472_ebo_32_1_261219.ScanId;v=1;d1=36414.36414.3	controllerType=0 controllerNumber=1 scan=36414	73.488
31188:4	1	S.M[+15.995]PLPPHPGHPGYINFS[+79.966]YEVLTPLKW[+15.995].Y		M[+16], S[+80], W[+16]	751.367	4	3002.45	3002.43	0	5.6	17	Non	207.75	118.44	3.88	2.61	1651	>sp|P02817|AMELX_BOVIN Amelogenin, X isoform OS=Bos taurus OX=9913 GN=AMELX PE=1 SV=2	1	hf1_10472_ebo_32_1_261219.ScanId;v=1;d1=23133.23133.4	controllerType=0 controllerNumber=1 scan=23133	47.2506
32345:3	1	S.MP[+15.995]LPPHPGHPGYINFS[+79.966]YEVLTPLKW[+15.995].Y		P[+16], S[+80], W[+16]	1001.49	3	3002.46	3002.43	0	8.2	17	Non	280.26	280.26	3.8	5.92	1651	>sp|P02817|AMELX_BOVIN Amelogenin, X isoform OS=Bos taurus OX=9913 GN=AMELX PE=1 SV=2	1	hf1_10472_ebo_32_1_261219.ScanId;v=1;d1=23882.23882.3	controllerType=0 controllerNumber=1 scan=23882	48.5532
35071:4	1	S.MP[+15.995]LPPHPGHPGYIN[+0.984]FS[+79.966]YEVLTPLKW.Y		N[+1], P[+16], S[+80]	747.616	4	2987.44	2987.42	0	7.3	17	Non	300.91	167.44	3.85	5.39	1651	>sp|P02817|AMELX_BOVIN Amelogenin, X isoform OS=Bos taurus OX=9913 GN=AMELX PE=1 SV=2	1	hf1_10472_ebo_32_1_261219.ScanId;v=1;d1=25684.25684.4	controllerType=0 controllerNumber=1 scan=25684	51.7039
34758:4	1	S.MP[+15.995]LPPHPGHPGYIN[+0.984]FS[+79.966]YEVLTPLKW.Y		N[+1], P[+16], S[+80]	747.615	4	2987.44	2987.42	0	5.9	17	Non	318.58	242.87	5.8	5.92	1651	>sp|P02817|AMELX_BOVIN Amelogenin, X isoform OS=Bos taurus OX=9913 GN=AMELX PE=1 SV=2	1	hf1_10472_ebo_32_1_261219.ScanId;v=1;d1=25480.25480.4	controllerType=0 controllerNumber=1 scan=25480	51.345
34749:3	1	S.M[+15.995]PLPPHPGHPGYIN[+0.984]FS[+79.966]YEVLTPLKW.Y		M[+16], N[+1], S[+80]	996.486	3	2987.44	2987.42	0	7.4	17	Non	751.25	477.04	19.97	13.03	1651	>sp|P02817|AMELX_BOVIN Amelogenin, X isoform OS=Bos taurus OX=9913 GN=AMELX PE=1 SV=2	1	hf1_10472_ebo_32_1_261219.ScanId;v=1;d1=25475.25475.3	controllerType=0 controllerNumber=1 scan=25475	51.3377
35054:3	1	S.M[+15.995]PLPPHPGHPGYIN[+0.984]FS[+79.966]YEVLTPLKW.Y		M[+16], N[+1], S[+80]	996.486	3	2987.44	2987.42	0	7.4	17	Non	784.64	533.41	27.78	13.03	1651	>sp|P02817|AMELX_BOVIN Amelogenin, X isoform OS=Bos taurus OX=9913 GN=AMELX PE=1 SV=2	1	hf1_10472_ebo_32_1_261219.ScanId;v=1;d1=25674.25674.3	controllerType=0 controllerNumber=1 scan=25674	51.6859
35464:4	1	S.MPLPPHPGHPGYINFSYEVLTPLKWY.Q			764.143	4	3053.55	3053.54	0	3.8	17	Non	177.8	177.8	177.8	2.76	1651	>sp|P02817|AMELX_BOVIN Amelogenin, X isoform OS=Bos taurus OX=9913 GN=AMELX PE=1 SV=2	1	hf1_10472_ebo_32_1_261219.ScanId;v=1;d1=25955.25955.4	controllerType=0 controllerNumber=1 scan=25955	52.1816
35150:4	1	S.MPLPPHPGHPGYINFSYEVLTPLKWY.Q			764.144	4	3053.55	3053.54	0	5.2	17	Non	224.32	224.32	224.32	4.03	1651	>sp|P02817|AMELX_BOVIN Amelogenin, X isoform OS=Bos taurus OX=9913 GN=AMELX PE=1 SV=2	1	hf1_10472_ebo_32_1_261219.ScanId;v=1;d1=25740.25740.6	controllerType=0 controllerNumber=1 scan=25740	51.8035
34389:4	1	S.MPLPPHPGHPGYINFSYEVLTPLKWY.Q			764.143	4	3053.55	3053.54	0	3.4	17	Non	308.8	308.8	308.8	5.59	1651	>sp|P02817|AMELX_BOVIN Amelogenin, X isoform OS=Bos taurus OX=9913 GN=AMELX PE=1 SV=2	1	hf1_10472_ebo_32_1_261219.ScanId;v=1;d1=25235.25235.4	controllerType=0 controllerNumber=1 scan=25235	50.9103
35781:3	1	S.MPLPPHPGHPGYINFS[+79.966]YEVLTPLKWY.Q		S[+80]	1045.18	3	3133.53	3133.5	0	7.9	17	Non	159.51	159.51	55.98	2.42	1651	>sp|P02817|AMELX_BOVIN Amelogenin, X isoform OS=Bos taurus OX=9913 GN=AMELX PE=1 SV=2	1	hf1_10472_ebo_32_1_261219.ScanId;v=1;d1=26168.26168.3	controllerType=0 controllerNumber=1 scan=26168	52.5582
38162:3	1	S.MPLPPHPGHPGYINFS[+79.966]YEVLTPLKWY.Q		S[+80]	1045.18	3	3133.52	3133.5	0	4.1	17	Non	245.32	245.32	1.55	5.15	1651	>sp|P02817|AMELX_BOVIN Amelogenin, X isoform OS=Bos taurus OX=9913 GN=AMELX PE=1 SV=2	1	hf1_10472_ebo_32_1_261219.ScanId;v=1;d1=27732.27732.3	controllerType=0 controllerNumber=1 scan=27732	55.3307
33188:4	1	S.MP[+15.995]LPPHPGHPGYINFSYEVLTPLKWY.Q		P[+16]	768.144	4	3069.55	3069.53	0	7.1	17	Non	261.21	261.21	7.3	5.38	1651	>sp|P02817|AMELX_BOVIN Amelogenin, X isoform OS=Bos taurus OX=9913 GN=AMELX PE=1 SV=2	1	hf1_10472_ebo_32_1_261219.ScanId;v=1;d1=24435.24435.4	controllerType=0 controllerNumber=1 scan=24435	49.5188
34362:4	1	S.MP[+15.995]LPPHPGHPGYINFSYEVLTPLKWY.Q		P[+16]	768.141	4	3069.54	3069.53	0	2.9	17	Non	325.47	325.47	5.8	5.82	1651	>sp|P02817|AMELX_BOVIN Amelogenin, X isoform OS=Bos taurus OX=9913 GN=AMELX PE=1 SV=2	1	hf1_10472_ebo_32_1_261219.ScanId;v=1;d1=25216.25216.4	controllerType=0 controllerNumber=1 scan=25216	50.8761
37371:4	1	S.MPLPPHPGHPGYINFS[+79.966]YEVLTPLKWY.Q		S[+80]	784.132	4	3133.51	3133.5	0	0.7	17	Non	330.05	330.05	2.44	5.36	1651	>sp|P02817|AMELX_BOVIN Amelogenin, X isoform OS=Bos taurus OX=9913 GN=AMELX PE=1 SV=2	1	hf1_10472_ebo_32_1_261219.ScanId;v=1;d1=27204.27204.4	controllerType=0 controllerNumber=1 scan=27204	54.3929
36764:4	1	S.MPLPPHPGHPGYINFS[+79.966]YEVLTPLKWY.Q		S[+80]	784.137	4	3133.53	3133.5	0	6.9	17	Non	352.79	352.79	25.52	6.37	1651	>sp|P02817|AMELX_BOVIN Amelogenin, X isoform OS=Bos taurus OX=9913 GN=AMELX PE=1 SV=2	1	hf1_10472_ebo_32_1_261219.ScanId;v=1;d1=26813.26813.4	controllerType=0 controllerNumber=1 scan=26813	53.6996
37073:4	1	S.MPLPPHPGHPGYINFS[+79.966]YEVLTPLKWY.Q		S[+80]	784.137	4	3133.53	3133.5	0	6.6	17	Non	364.52	364.52	59.98	6.97	1651	>sp|P02817|AMELX_BOVIN Amelogenin, X isoform OS=Bos taurus OX=9913 GN=AMELX PE=1 SV=2	1	hf1_10472_ebo_32_1_261219.ScanId;v=1;d1=27012.27012.4	controllerType=0 controllerNumber=1 scan=27012	54.0555
37270:3	1	S.MPLPPHPGHPGYINFS[+79.966]YEVLTPLKWY.Q		S[+80]	1045.18	3	3133.52	3133.5	0	5.5	17	Non	753.6	753.6	249.57	12.97	1651	>sp|P02817|AMELX_BOVIN Amelogenin, X isoform OS=Bos taurus OX=9913 GN=AMELX PE=1 SV=2	1	hf1_10472_ebo_32_1_261219.ScanId;v=1;d1=27139.27139.3	controllerType=0 controllerNumber=1 scan=27139	54.2788
36961:3	1	S.MPLPPHPGHPGYINFS[+79.966]YEVLTPLKWY.Q		S[+80]	1045.18	3	3133.53	3133.5	0	7.7	17	Non	968.23	968.23	361.82	16.75	1651	>sp|P02817|AMELX_BOVIN Amelogenin, X isoform OS=Bos taurus OX=9913 GN=AMELX PE=1 SV=2	1	hf1_10472_ebo_32_1_261219.ScanId;v=1;d1=26941.26941.3	controllerType=0 controllerNumber=1 scan=26941	53.9292
36660:3	1	S.MPLPPHPGHPGYINFS[+79.966]YEVLTPLKWY.Q		S[+80]	1045.18	3	3133.53	3133.5	0	7	17	Non	1009.1	1009.1	414.49	17.97	1651	>sp|P02817|AMELX_BOVIN Amelogenin, X isoform OS=Bos taurus OX=9913 GN=AMELX PE=1 SV=2	1	hf1_10472_ebo_32_1_261219.ScanId;v=1;d1=26747.26747.3	controllerType=0 controllerNumber=1 scan=26747	53.5837
36329:3	1	S.MPLPPHPGHPGYIN[+0.984]FS[+79.966]YEVLTPLKWY.Q		N[+1], S[+80]	1045.51	3	3134.51	3134.49	0	6.5	17	Non	121.49	121.49	19.59	2.33	1651	>sp|P02817|AMELX_BOVIN Amelogenin, X isoform OS=Bos taurus OX=9913 GN=AMELX PE=1 SV=2	1	hf1_10472_ebo_32_1_261219.ScanId;v=1;d1=26534.26534.3	controllerType=0 controllerNumber=1 scan=26534	53.2095
35124:5	1	S.MP[+15.995]LPPHPGHPGYINFS[+79.966]YEVLTPLKWY.Q		P[+16], S[+80]	630.71	5	3149.52	3149.5	0	6.1	17	Non	153.2	153.2	5.8	1.65	1651	>sp|P02817|AMELX_BOVIN Amelogenin, X isoform OS=Bos taurus OX=9913 GN=AMELX PE=1 SV=2	1	hf1_10472_ebo_32_1_261219.ScanId;v=1;d1=25722.25722.5	controllerType=0 controllerNumber=1 scan=25722	51.7714
49988:4	1	S.MP[+15.995]LPPHPGHPGYINFS[+79.966]YEVLTPLKWY.Q		P[+16], S[+80]	788.136	4	3149.52	3149.5	0	7.2	17	Non	157.13	157.13	5.8	2.68	1651	>sp|P02817|AMELX_BOVIN Amelogenin, X isoform OS=Bos taurus OX=9913 GN=AMELX PE=1 SV=2	1	hf1_10472_ebo_32_1_261219.ScanId;v=1;d1=36415.36415.4	controllerType=0 controllerNumber=1 scan=36415	73.4895
35628:4	1	S.MPLPPHPGHPGYINFS[+79.966]Y[+31.990]EVLTPLKWY.Q		S[+80], Y[+32]	792.134	4	3165.51	3165.49	0	5.6	17	Non	157.24	157.24	0.02	2.42	1651	>sp|P02817|AMELX_BOVIN Amelogenin, X isoform OS=Bos taurus OX=9913 GN=AMELX PE=1 SV=2	1	hf1_10472_ebo_32_1_261219.ScanId;v=1;d1=26065.26065.4	controllerType=0 controllerNumber=1 scan=26065	52.3767
37283:4	1	S.MP[+15.995]LPPHPGHPGYINFS[+79.966]YEVLTPLKWY.Q		P[+16], S[+80]	788.132	4	3149.51	3149.5	0	2	17	Non	172.36	172.36	2.37	1.95	1651	>sp|P02817|AMELX_BOVIN Amelogenin, X isoform OS=Bos taurus OX=9913 GN=AMELX PE=1 SV=2	1	hf1_10472_ebo_32_1_261219.ScanId;v=1;d1=27146.27146.4	controllerType=0 controllerNumber=1 scan=27146	54.2887
35236:4	1	S.MPLPPHPGHPGYINFS[+79.966]Y[+31.990]EVLTPLKWY.Q		S[+80], Y[+32]	792.13	4	3165.5	3165.49	0	1.8	17	Non	174.65	174.65	11.24	2.5	1651	>sp|P02817|AMELX_BOVIN Amelogenin, X isoform OS=Bos taurus OX=9913 GN=AMELX PE=1 SV=2	1	hf1_10472_ebo_32_1_261219.ScanId;v=1;d1=25800.25800.4	controllerType=0 controllerNumber=1 scan=25800	51.9099
35417:5	1	S.MP[+15.995]LPPHPGHPGYINFS[+79.966]YEVLTPLKWY.Q		P[+16], S[+80]	630.709	5	3149.52	3149.5	0	5.1	17	Non	191.71	191.71	5.8	2.85	1651	>sp|P02817|AMELX_BOVIN Amelogenin, X isoform OS=Bos taurus OX=9913 GN=AMELX PE=1 SV=2	1	hf1_10472_ebo_32_1_261219.ScanId;v=1;d1=25922.25922.5	controllerType=0 controllerNumber=1 scan=25922	52.1224
33848:4	1	S.MP[+15.995]LPPHPGHPGYIN[+0.984]FSYEVLTPLKWY.Q		N[+1], P[+16]	768.391	4	3070.54	3070.52	0	7.7	17	Non	198.25	198.25	5.8	3.47	1651	>sp|P02817|AMELX_BOVIN Amelogenin, X isoform OS=Bos taurus OX=9913 GN=AMELX PE=1 SV=2	1	hf1_10472_ebo_32_1_261219.ScanId;v=1;d1=24864.24864.4	controllerType=0 controllerNumber=1 scan=24864	50.2647
34662:4	1	S.MP[+15.995]LPPHPGHPGYIN[+0.984]FSYEVLTPLKWY.Q		N[+1], P[+16]	768.388	4	3070.53	3070.52	0	4.3	17	Non	213.4	213.4	5.8	3.76	1651	>sp|P02817|AMELX_BOVIN Amelogenin, X isoform OS=Bos taurus OX=9913 GN=AMELX PE=1 SV=2	1	hf1_10472_ebo_32_1_261219.ScanId;v=1;d1=25416.25416.4	controllerType=0 controllerNumber=1 scan=25416	51.2328
34227:3	1	S.MP[+15.995]LPPHPGHPGYINFS[+79.966]YEVLTPLKWY.Q		P[+16], S[+80]	1050.51	3	3149.5	3149.5	0	1.3	17	Non	242.09	242.09	5.8	4.69	1651	>sp|P02817|AMELX_BOVIN Amelogenin, X isoform OS=Bos taurus OX=9913 GN=AMELX PE=1 SV=2	1	hf1_10472_ebo_32_1_261219.ScanId;v=1;d1=25125.25125.3	controllerType=0 controllerNumber=1 scan=25125	50.7193
37942:4	1	S.MPLPPHPGHPGYIN[+0.984]FS[+79.966]YEVLTPLKWY.Q		N[+1], S[+80]	784.383	4	3134.51	3134.49	0	6.2	17	Non	266.41	266.41	48.76	5.59	1651	>sp|P02817|AMELX_BOVIN Amelogenin, X isoform OS=Bos taurus OX=9913 GN=AMELX PE=1 SV=2	1	hf1_10472_ebo_32_1_261219.ScanId;v=1;d1=27586.27586.4	controllerType=0 controllerNumber=1 scan=27586	55.0729
36664:4	1	S.MP[+15.995]LPPHPGHPGYINFS[+79.966]YEVLTPLKWY.Q		P[+16], S[+80]	788.134	4	3149.51	3149.5	0	4.6	17	Non	277.3	277.3	5.8	4.93	1651	>sp|P02817|AMELX_BOVIN Amelogenin, X isoform OS=Bos taurus OX=9913 GN=AMELX PE=1 SV=2	1	hf1_10472_ebo_32_1_261219.ScanId;v=1;d1=26750.26750.4	controllerType=0 controllerNumber=1 scan=26750	53.5882
35398:4	1	S.MP[+15.995]LPPHPGHPGYINFS[+79.966]YEVLTPLKWY.Q		P[+16], S[+80]	788.135	4	3149.52	3149.5	0	5.5	17	Non	286.67	286.67	4	5.82	1651	>sp|P02817|AMELX_BOVIN Amelogenin, X isoform OS=Bos taurus OX=9913 GN=AMELX PE=1 SV=2	1	hf1_10472_ebo_32_1_261219.ScanId;v=1;d1=25909.25909.4	controllerType=0 controllerNumber=1 scan=25909	52.1007
37372:4	1	S.MPLPPHPGHPGYIN[+0.984]FS[+79.966]YEVLTPLKWY.Q		N[+1], S[+80]	784.383	4	3134.51	3134.49	0	6.8	17	Non	295.33	295.33	20.54	5.86	1651	>sp|P02817|AMELX_BOVIN Amelogenin, X isoform OS=Bos taurus OX=9913 GN=AMELX PE=1 SV=2	1	hf1_10472_ebo_32_1_261219.ScanId;v=1;d1=27204.27204.4	controllerType=0 controllerNumber=1 scan=27204	54.3929
35103:4	1	S.MP[+15.995]LPPHPGHPGYINFS[+79.966]YEVLTPLKWY.Q		P[+16], S[+80]	788.135	4	3149.52	3149.5	0	5.7	17	Non	305.73	305.73	4	5.86	1651	>sp|P02817|AMELX_BOVIN Amelogenin, X isoform OS=Bos taurus OX=9913 GN=AMELX PE=1 SV=2	1	hf1_10472_ebo_32_1_261219.ScanId;v=1;d1=25708.25708.4	controllerType=0 controllerNumber=1 scan=25708	51.7485
37653:4	1	S.MPLPPHPGHPGYIN[+0.984]FS[+79.966]YEVLTPLKWY.Q		N[+1], S[+80]	784.382	4	3134.51	3134.49	0	6	17	Non	312.87	312.87	35.67	5.86	1651	>sp|P02817|AMELX_BOVIN Amelogenin, X isoform OS=Bos taurus OX=9913 GN=AMELX PE=1 SV=2	1	hf1_10472_ebo_32_1_261219.ScanId;v=1;d1=27394.27394.4	controllerType=0 controllerNumber=1 scan=27394	54.7342
35687:4	1	S.MP[+15.995]LPPHPGHPGYINFS[+79.966]YEVLTPLKWY.Q		P[+16], S[+80]	788.135	4	3149.52	3149.5	0	5.7	17	Non	322.35	322.35	5.8	6.1	1651	>sp|P02817|AMELX_BOVIN Amelogenin, X isoform OS=Bos taurus OX=9913 GN=AMELX PE=1 SV=2	1	hf1_10472_ebo_32_1_261219.ScanId;v=1;d1=26106.26106.4	controllerType=0 controllerNumber=1 scan=26106	52.4517
37855:3	1	S.MPLPPHPGHPGYIN[+0.984]FS[+79.966]YEVLTPLKWY.Q		N[+1], S[+80]	1045.51	3	3134.51	3134.49	0	6.4	17	Non	783.38	783.38	370.04	12.97	1651	>sp|P02817|AMELX_BOVIN Amelogenin, X isoform OS=Bos taurus OX=9913 GN=AMELX PE=1 SV=2	1	hf1_10472_ebo_32_1_261219.ScanId;v=1;d1=27527.27527.3	controllerType=0 controllerNumber=1 scan=27527	54.9674
37561:3	1	S.MPLPPHPGHPGYIN[+0.984]FS[+79.966]YEVLTPLKWY.Q		N[+1], S[+80]	1045.51	3	3134.51	3134.49	0	6.3	17	Non	854.15	854.15	341.92	14.97	1651	>sp|P02817|AMELX_BOVIN Amelogenin, X isoform OS=Bos taurus OX=9913 GN=AMELX PE=1 SV=2	1	hf1_10472_ebo_32_1_261219.ScanId;v=1;d1=27334.27334.3	controllerType=0 controllerNumber=1 scan=27334	54.627
35586:3	1	S.M[+15.995]PLPPHPGHPGYINFS[+79.966]YEVLTPLKWY.Q		M[+16], S[+80]	1050.51	3	3149.52	3149.5	0	7.5	17	Non	891.36	891.36	14.64	14.75	1651	>sp|P02817|AMELX_BOVIN Amelogenin, X isoform OS=Bos taurus OX=9913 GN=AMELX PE=1 SV=2	1	hf1_10472_ebo_32_1_261219.ScanId;v=1;d1=26036.26036.3	controllerType=0 controllerNumber=1 scan=26036	52.3254
35297:3	1	S.M[+15.995]PLPPHPGHPGYINFS[+79.966]YEVLTPLKWY.Q		M[+16], S[+80]	1050.51	3	3149.52	3149.5	0	6.5	17	Non	971.47	971.47	27.46	16.97	1651	>sp|P02817|AMELX_BOVIN Amelogenin, X isoform OS=Bos taurus OX=9913 GN=AMELX PE=1 SV=2	1	hf1_10472_ebo_32_1_261219.ScanId;v=1;d1=25842.25842.3	controllerType=0 controllerNumber=1 scan=25842	51.9862
36454:4	1	S.MPLPPHPGHPGY[+15.995]INF[+31.990]SY[+31.990]EVLTPLKWY.Q		F[+32], Y[+16][+32]	784.133	4	3133.51	3133.51	0	-0.7	17	Non	142.61	142.61	2.84	1.8	1651	>sp|P02817|AMELX_BOVIN Amelogenin, X isoform OS=Bos taurus OX=9913 GN=AMELX PE=1 SV=2	1	hf1_10472_ebo_32_1_261219.ScanId;v=1;d1=26617.26617.4	controllerType=0 controllerNumber=1 scan=26617	53.3558
36955:5	1	S.MPLPPHPGHPGY[+31.990]INF[+15.995]SY[+31.990]EVLTPLKWY.Q		F[+16], Y[+32]*2	627.511	5	3133.53	3133.51	0	4.5	17	Non	143.72	143.72	4.28	2.4	1651	>sp|P02817|AMELX_BOVIN Amelogenin, X isoform OS=Bos taurus OX=9913 GN=AMELX PE=1 SV=2	1	hf1_10472_ebo_32_1_261219.ScanId;v=1;d1=26936.26936.5	controllerType=0 controllerNumber=1 scan=26936	53.9188
32711:4	1	S.MP[+15.995]LPPHPGHPGYINFS[+79.966]YEVLTPLKW[+15.995]Y.Q		P[+16], S[+80], W[+16]	792.132	4	3165.5	3165.49	0	3.2	17	Non	168.22	168.22	5.8	3.41	1651	>sp|P02817|AMELX_BOVIN Amelogenin, X isoform OS=Bos taurus OX=9913 GN=AMELX PE=1 SV=2	1	hf1_10472_ebo_32_1_261219.ScanId;v=1;d1=24121.24121.5	controllerType=0 controllerNumber=1 scan=24121	48.9713
32456:4	1	S.MP[+15.995]LPPHPGHPGYINFS[+79.966]YEVLTPLKW[+15.995]Y.Q		P[+16], S[+80], W[+16]	792.134	4	3165.51	3165.49	0	6.5	17	Non	171.87	171.87	4.25	2.97	1651	>sp|P02817|AMELX_BOVIN Amelogenin, X isoform OS=Bos taurus OX=9913 GN=AMELX PE=1 SV=2	1	hf1_10472_ebo_32_1_261219.ScanId;v=1;d1=23955.23955.4	controllerType=0 controllerNumber=1 scan=23955	48.6823
38236:4	1	S.MPLPPHPGHPGY[+31.990]INF[+15.995]SY[+31.990]EVLTPLKWY.Q		F[+16], Y[+32]*2	784.133	4	3133.51	3133.51	0	-0.9	17	Non	177.12	177.12	1.5	2.44	1651	>sp|P02817|AMELX_BOVIN Amelogenin, X isoform OS=Bos taurus OX=9913 GN=AMELX PE=1 SV=2	1	hf1_10472_ebo_32_1_261219.ScanId;v=1;d1=27781.27781.4	controllerType=0 controllerNumber=1 scan=27781	55.4175
34076:3	1	S.MP[+15.995]LPPHPGHPGYINFS[+79.966]YEVLTPLKW[+15.995]Y.Q		P[+16], S[+80], W[+16]	1055.84	3	3165.51	3165.49	0	6.3	17	Non	178.32	178.32	0	3.15	1651	>sp|P02817|AMELX_BOVIN Amelogenin, X isoform OS=Bos taurus OX=9913 GN=AMELX PE=1 SV=2	1	hf1_10472_ebo_32_1_261219.ScanId;v=1;d1=25019.25019.3	controllerType=0 controllerNumber=1 scan=25019	50.5313
35105:4	1	S.MP[+15.995]LPPHPGHPGY[+15.995]INFS[+79.966]YEVLTPLKWY.Q		P[+16], S[+80], Y[+16]	792.133	4	3165.51	3165.49	0	4.8	17	Non	186.3	186.3	5.8	2.97	1651	>sp|P02817|AMELX_BOVIN Amelogenin, X isoform OS=Bos taurus OX=9913 GN=AMELX PE=1 SV=2	1	hf1_10472_ebo_32_1_261219.ScanId;v=1;d1=25710.25710.4	controllerType=0 controllerNumber=1 scan=25710	51.7511
35923:4	1	S.MPLPPHPGHPGYIN[+0.984]FS[+79.966]Y[+31.990]EVLTPLKWY.Q		N[+1], S[+80], Y[+32]	792.383	4	3166.51	3166.48	0	9.9	17	Non	189.82	189.82	28.31	2.5	1651	>sp|P02817|AMELX_BOVIN Amelogenin, X isoform OS=Bos taurus OX=9913 GN=AMELX PE=1 SV=2	1	hf1_10472_ebo_32_1_261219.ScanId;v=1;d1=26264.26264.4	controllerType=0 controllerNumber=1 scan=26264	52.73
36063:4	1	S.MP[+15.995]LPPHPGHPGYIN[+0.984]FS[+79.966]YEVLTPLKWY.Q		N[+1], P[+16], S[+80]	788.382	4	3150.51	3150.48	0	7.3	17	Non	193.37	193.37	5.8	2.8	1651	>sp|P02817|AMELX_BOVIN Amelogenin, X isoform OS=Bos taurus OX=9913 GN=AMELX PE=1 SV=2	1	hf1_10472_ebo_32_1_261219.ScanId;v=1;d1=26354.26354.4	controllerType=0 controllerNumber=1 scan=26354	52.8893
36356:4	1	S.MP[+15.995]LPPHPGHPGYIN[+0.984]FS[+79.966]YEVLTPLKWY.Q		N[+1], P[+16], S[+80]	788.382	4	3150.51	3150.48	0	7.1	17	Non	201.33	201.33	5.8	3.09	1651	>sp|P02817|AMELX_BOVIN Amelogenin, X isoform OS=Bos taurus OX=9913 GN=AMELX PE=1 SV=2	1	hf1_10472_ebo_32_1_261219.ScanId;v=1;d1=26551.26551.4	controllerType=0 controllerNumber=1 scan=26551	53.2401
35660:4	1	S.MPLPPHPGHPGY[+15.995]INF[+31.990]SY[+31.990]EVLTPLKWY.Q		F[+32], Y[+16][+32]	784.136	4	3133.52	3133.51	0	3	17	Non	205.48	205.48	1.6	3.76	1651	>sp|P02817|AMELX_BOVIN Amelogenin, X isoform OS=Bos taurus OX=9913 GN=AMELX PE=1 SV=2	1	hf1_10472_ebo_32_1_261219.ScanId;v=1;d1=26087.26087.4	controllerType=0 controllerNumber=1 scan=26087	52.4182
50008:3	1	S.MPLPPHPGHP[+15.995]GYINF[+31.990]SY[+31.990]EVLTPLKWY.Q		F[+32], P[+16], Y[+32]	1045.18	3	3133.54	3133.51	0	7.6	17	Non	212.96	212.96	4.13	4.41	1651	>sp|P02817|AMELX_BOVIN Amelogenin, X isoform OS=Bos taurus OX=9913 GN=AMELX PE=1 SV=2	1	hf1_10472_ebo_32_1_261219.ScanId;v=1;d1=36430.36430.3	controllerType=0 controllerNumber=1 scan=36430	73.5141
36651:5	1	S.MPLPPHPGHPGY[+31.990]INF[+31.990]SY[+15.995]EVLTPLKWY.Q		F[+32], Y[+16][+32]	627.511	5	3133.52	3133.51	0	3.7	17	Non	222.45	222.45	1.5	3.24	1651	>sp|P02817|AMELX_BOVIN Amelogenin, X isoform OS=Bos taurus OX=9913 GN=AMELX PE=1 SV=2	1	hf1_10472_ebo_32_1_261219.ScanId;v=1;d1=26741.26741.5	controllerType=0 controllerNumber=1 scan=26741	53.5718
35184:3	1	S.MP[+15.995]LPPHPGHPGYINFS[+79.966]Y[+31.990]EVLTPLKWY.Q		P[+16], S[+80], Y[+32]	1061.18	3	3181.52	3181.49	0	9.7	17	Non	235.88	235.88	5.8	2.85	1651	>sp|P02817|AMELX_BOVIN Amelogenin, X isoform OS=Bos taurus OX=9913 GN=AMELX PE=1 SV=2	1	hf1_10472_ebo_32_1_261219.ScanId;v=1;d1=25764.25764.3	controllerType=0 controllerNumber=1 scan=25764	51.8441
33574:4	1	S.MP[+15.995]LPPHPGHPGYINFS[+79.966]YEVLTPLKW[+15.995]Y.Q		P[+16], S[+80], W[+16]	792.133	4	3165.51	3165.49	0	5.4	17	Non	237.57	237.57	5.8	4.03	1651	>sp|P02817|AMELX_BOVIN Amelogenin, X isoform OS=Bos taurus OX=9913 GN=AMELX PE=1 SV=2	1	hf1_10472_ebo_32_1_261219.ScanId;v=1;d1=24681.24681.4	controllerType=0 controllerNumber=1 scan=24681	49.9483
37051:3	1	S.MP[+15.995]LPPHPGHPGYIN[+0.984]FS[+79.966]YEVLTPLKWY.Q		N[+1], P[+16], S[+80]	1050.84	3	3150.51	3150.48	0	9.3	17	Non	238.12	238.12	5.8	3.52	1651	>sp|P02817|AMELX_BOVIN Amelogenin, X isoform OS=Bos taurus OX=9913 GN=AMELX PE=1 SV=2	1	hf1_10472_ebo_32_1_261219.ScanId;v=1;d1=26997.26997.5	controllerType=0 controllerNumber=1 scan=26997	54.0274
34376:3	1	S.MP[+15.995]LPPHPGHPGYINFS[+79.966]YEVLTPLKWY[+15.995].Q		P[+16], S[+80], Y[+16]	1055.84	3	3165.5	3165.49	0	3.3	17	Non	307.2	307.2	0	5.75	1651	>sp|P02817|AMELX_BOVIN Amelogenin, X isoform OS=Bos taurus OX=9913 GN=AMELX PE=1 SV=2	1	hf1_10472_ebo_32_1_261219.ScanId;v=1;d1=25226.25226.3	controllerType=0 controllerNumber=1 scan=25226	50.8941
34414:3	1	S.MP[+15.995]LPPHPGHPGYINFS[+79.966]YEVLTPLKWY[+31.990].Q		P[+16], S[+80], Y[+32]	1061.18	3	3181.51	3181.49	0	7.3	17	Non	366.81	366.81	0	6.98	1651	>sp|P02817|AMELX_BOVIN Amelogenin, X isoform OS=Bos taurus OX=9913 GN=AMELX PE=1 SV=2	1	hf1_10472_ebo_32_1_261219.ScanId;v=1;d1=25250.25250.3	controllerType=0 controllerNumber=1 scan=25250	50.9356
34668:3	1	S.MP[+15.995]LPPHPGHPGYINFS[+79.966]YEVLTPLKW[+15.995]Y.Q		P[+16], S[+80], W[+16]	1055.84	3	3165.51	3165.49	0	5.3	17	Non	397.24	397.24	0	7.19	1651	>sp|P02817|AMELX_BOVIN Amelogenin, X isoform OS=Bos taurus OX=9913 GN=AMELX PE=1 SV=2	1	hf1_10472_ebo_32_1_261219.ScanId;v=1;d1=25421.25421.3	controllerType=0 controllerNumber=1 scan=25421	51.2432
34973:3	1	S.MP[+15.995]LPP[+15.995]HPGHPGYINFS[+79.966]YEVLTPLKWY.Q		P[+16]*2, S[+80]	1055.84	3	3165.51	3165.49	0	5.1	17	Non	416.2	416.2	2.8	7.26	1651	>sp|P02817|AMELX_BOVIN Amelogenin, X isoform OS=Bos taurus OX=9913 GN=AMELX PE=1 SV=2	1	hf1_10472_ebo_32_1_261219.ScanId;v=1;d1=25621.25621.3	controllerType=0 controllerNumber=1 scan=25621	51.5922
33602:3	1	S.M[+15.995]PLPPHPGHPGYINFS[+79.966]YEVLTPLKWY[+15.995].Q		M[+16], S[+80], Y[+16]	1055.84	3	3165.51	3165.49	0	5	17	Non	688.98	688.98	0	10.97	1651	>sp|P02817|AMELX_BOVIN Amelogenin, X isoform OS=Bos taurus OX=9913 GN=AMELX PE=1 SV=2	1	hf1_10472_ebo_32_1_261219.ScanId;v=1;d1=24699.24699.3	controllerType=0 controllerNumber=1 scan=24699	49.9779
36170:3	1	S.M[+15.995]PLPPHPGHPGYIN[+0.984]FS[+79.966]YEVLTPLKWY.Q		M[+16], N[+1], S[+80]	1050.84	3	3150.5	3150.48	0	6.1	17	Non	882.85	882.85	14.44	14.97	1651	>sp|P02817|AMELX_BOVIN Amelogenin, X isoform OS=Bos taurus OX=9913 GN=AMELX PE=1 SV=2	1	hf1_10472_ebo_32_1_261219.ScanId;v=1;d1=26423.26423.3	controllerType=0 controllerNumber=1 scan=26423	53.0139
36451:3	1	S.M[+15.995]PLPPHPGHPGYIN[+0.984]FS[+79.966]YEVLTPLKWY.Q		M[+16], N[+1], S[+80]	1050.84	3	3150.51	3150.48	0	9.2	17	Non	888.3	884.31	9.38	14.75	1651	>sp|P02817|AMELX_BOVIN Amelogenin, X isoform OS=Bos taurus OX=9913 GN=AMELX PE=1 SV=2	1	hf1_10472_ebo_32_1_261219.ScanId;v=1;d1=26615.26615.3	controllerType=0 controllerNumber=1 scan=26615	53.3527
49965:4	1	S.MPLPPHPGHPGY[+31.990]IN[+0.984]F[+31.990]SY[+15.995]EVLTPLKWY.Q		F[+32], N[+1], Y[+16][+32]	784.385	4	3134.52	3134.5	0	7.2	17	Non	153.65	153.65	1.13	2.68	1651	>sp|P02817|AMELX_BOVIN Amelogenin, X isoform OS=Bos taurus OX=9913 GN=AMELX PE=1 SV=2	1	hf1_10472_ebo_32_1_261219.ScanId;v=1;d1=36399.36399.4	controllerType=0 controllerNumber=1 scan=36399	73.4598
34127:4	1	S.MPLPPHPGHPGYINFSYEVLTPLKWYQ.S			796.153	4	3181.59	3181.6	0	-2.7	17	Non	181.8	153.82	153.82	1.86	1651	>sp|P02817|AMELX_BOVIN Amelogenin, X isoform OS=Bos taurus OX=9913 GN=AMELX PE=1 SV=2	1	hf1_10472_ebo_32_1_261219.ScanId;v=1;d1=25054.25054.4	controllerType=0 controllerNumber=1 scan=25054	50.5952
34828:4	1	S.MPLPPHPGHPGYINFSYEVLTPLKWYQ.S			796.152	4	3181.59	3181.6	0	-2.8	17	Non	274.12	266.36	266.36	4.35	1651	>sp|P02817|AMELX_BOVIN Amelogenin, X isoform OS=Bos taurus OX=9913 GN=AMELX PE=1 SV=2	1	hf1_10472_ebo_32_1_261219.ScanId;v=1;d1=25529.25529.4	controllerType=0 controllerNumber=1 scan=25529	51.4323
35325:4	1	S.MPLPPHPGHPGYINFSYEVLTPLKWYQ[+0.984].S		Q[+1]	796.4	4	3182.58	3182.58	0	-0.2	17	Non	279.14	235.06	102.3	4.76	1651	>sp|P02817|AMELX_BOVIN Amelogenin, X isoform OS=Bos taurus OX=9913 GN=AMELX PE=1 SV=2	1	hf1_10472_ebo_32_1_261219.ScanId;v=1;d1=25859.25859.4	controllerType=0 controllerNumber=1 scan=25859	52.0139
35387:4	1	S.MPLPPHPGHPGYINFS[+79.966]YEVLTPLKWYQ.S		S[+80]	816.151	4	3261.58	3261.56	0	6.3	17	Non	300.08	300.08	98.61	5.82	1651	>sp|P02817|AMELX_BOVIN Amelogenin, X isoform OS=Bos taurus OX=9913 GN=AMELX PE=1 SV=2	1	hf1_10472_ebo_32_1_261219.ScanId;v=1;d1=25901.25901.4	controllerType=0 controllerNumber=1 scan=25901	52.0867
32531:4	1	S.MP[+15.995]LPPHPGHPGYINFSYEVLTPLKWYQ.S		P[+16]	800.159	4	3197.61	3197.59	0	7	17	Non	301.15	301.15	5.8	5.65	1651	>sp|P02817|AMELX_BOVIN Amelogenin, X isoform OS=Bos taurus OX=9913 GN=AMELX PE=1 SV=2	1	hf1_10472_ebo_32_1_261219.ScanId;v=1;d1=24006.24006.4	controllerType=0 controllerNumber=1 scan=24006	48.773
35671:4	1	S.MPLPPHPGHPGYINFS[+79.966]YEVLTPLKWYQ.S		S[+80]	816.152	4	3261.59	3261.56	0	7.1	17	Non	367.72	367.72	110.58	7.03	1651	>sp|P02817|AMELX_BOVIN Amelogenin, X isoform OS=Bos taurus OX=9913 GN=AMELX PE=1 SV=2	1	hf1_10472_ebo_32_1_261219.ScanId;v=1;d1=26094.26094.4	controllerType=0 controllerNumber=1 scan=26094	52.4314
35694:3	1	S.MPLPPHPGHPGYINFS[+79.966]YEVLTPLKWYQ.S		S[+80]	1087.87	3	3261.59	3261.56	0	6.9	17	Non	657.83	657.83	222.57	10.97	1651	>sp|P02817|AMELX_BOVIN Amelogenin, X isoform OS=Bos taurus OX=9913 GN=AMELX PE=1 SV=2	1	hf1_10472_ebo_32_1_261219.ScanId;v=1;d1=26110.26110.3	controllerType=0 controllerNumber=1 scan=26110	52.4577
35946:3	1	S.MPLPPHPGHPGYINFS[+79.966]YEVLTPLKWYQ.S		S[+80]	1087.86	3	3261.58	3261.56	0	4.5	17	Non	763.49	763.49	269.91	12.69	1651	>sp|P02817|AMELX_BOVIN Amelogenin, X isoform OS=Bos taurus OX=9913 GN=AMELX PE=1 SV=2	1	hf1_10472_ebo_32_1_261219.ScanId;v=1;d1=26279.26279.3	controllerType=0 controllerNumber=1 scan=26279	52.7581
35658:3	1	S.MPLPPHPGHPGYINFS[+79.966]YEVLTPLKWYQ.S		S[+80]	1087.87	3	3261.59	3261.56	0	7.8	17	Non	819.93	819.93	292.58	13.75	1651	>sp|P02817|AMELX_BOVIN Amelogenin, X isoform OS=Bos taurus OX=9913 GN=AMELX PE=1 SV=2	1	hf1_10472_ebo_32_1_261219.ScanId;v=1;d1=26086.26086.3	controllerType=0 controllerNumber=1 scan=26086	52.4167
35369:3	1	S.MPLPPHPGHPGYINFS[+79.966]YEVLTPLKWYQ.S		S[+80]	1087.87	3	3261.58	3261.56	0	6.2	17	Non	842.13	842.13	255.84	13.97	1651	>sp|P02817|AMELX_BOVIN Amelogenin, X isoform OS=Bos taurus OX=9913 GN=AMELX PE=1 SV=2	1	hf1_10472_ebo_32_1_261219.ScanId;v=1;d1=25890.25890.3	controllerType=0 controllerNumber=1 scan=25890	52.0681
37929:3	1	S.MPLPPHPGHPGYINF[+31.990]SYEVLTPLKW[+31.990]YQ.S		F[+32], W[+32]	1082.52	3	3245.55	3245.58	0	-8.5	17	Non	141.77	141.77	0	1.59	1651	>sp|P02817|AMELX_BOVIN Amelogenin, X isoform OS=Bos taurus OX=9913 GN=AMELX PE=1 SV=2	1	hf1_10472_ebo_32_1_261219.ScanId;v=1;d1=27578.27578.5	controllerType=0 controllerNumber=1 scan=27578	55.0581
36257:4	1	S.MPLPPHPGHPGYINFS[+79.966]YEVLTPLKWYQ[+0.984].S		Q[+1], S[+80]	816.397	4	3262.57	3262.55	0	5.7	17	Non	223.03	223.03	30.95	4.03	1651	>sp|P02817|AMELX_BOVIN Amelogenin, X isoform OS=Bos taurus OX=9913 GN=AMELX PE=1 SV=2	1	hf1_10472_ebo_32_1_261219.ScanId;v=1;d1=26485.26485.4	controllerType=0 controllerNumber=1 scan=26485	53.1253
34258:4	1	S.MP[+15.995]LPPHPGHPGYINFS[+79.966]YEVLTPLKWYQ.S		P[+16], S[+80]	820.149	4	3277.58	3277.56	0	5.4	17	Non	249.8	249.8	4	5.59	1651	>sp|P02817|AMELX_BOVIN Amelogenin, X isoform OS=Bos taurus OX=9913 GN=AMELX PE=1 SV=2	1	hf1_10472_ebo_32_1_261219.ScanId;v=1;d1=25145.25145.4	controllerType=0 controllerNumber=1 scan=25145	50.7541
36421:3	1	S.MPLPPHPGHPGYIN[+0.984]FS[+79.966]YEVLTPLKWYQ.S		N[+1], S[+80]	1088.2	3	3262.57	3262.55	0	7.5	17	Non	253.12	253.12	2.64	5.59	1651	>sp|P02817|AMELX_BOVIN Amelogenin, X isoform OS=Bos taurus OX=9913 GN=AMELX PE=1 SV=2	1	hf1_10472_ebo_32_1_261219.ScanId;v=1;d1=26597.26597.3	controllerType=0 controllerNumber=1 scan=26597	53.3199
35964:4	1	S.MPLPPHPGHPGYINFS[+79.966]YEVLTPLKWYQ[+0.984].S		Q[+1], S[+80]	816.399	4	3262.57	3262.55	0	7.8	17	Non	262.53	262.53	36.65	5.38	1651	>sp|P02817|AMELX_BOVIN Amelogenin, X isoform OS=Bos taurus OX=9913 GN=AMELX PE=1 SV=2	1	hf1_10472_ebo_32_1_261219.ScanId;v=1;d1=26290.26290.4	controllerType=0 controllerNumber=1 scan=26290	52.7773
34554:4	1	S.M[+15.995]PLPPHPGHPGYINFS[+79.966]YEVLTPLKWYQ.S		M[+16], S[+80]	820.148	4	3277.57	3277.56	0	3.7	17	Non	275.54	275.54	15.63	5.32	1651	>sp|P02817|AMELX_BOVIN Amelogenin, X isoform OS=Bos taurus OX=9913 GN=AMELX PE=1 SV=2	1	hf1_10472_ebo_32_1_261219.ScanId;v=1;d1=25343.25343.4	controllerType=0 controllerNumber=1 scan=25343	51.1016
33960:4	1	S.M[+15.995]PLPPHPGHPGYINFS[+79.966]YEVLTPLKWYQ.S		M[+16], S[+80]	820.149	4	3277.58	3277.56	0	5.4	17	Non	288.04	288.04	7.67	5.82	1651	>sp|P02817|AMELX_BOVIN Amelogenin, X isoform OS=Bos taurus OX=9913 GN=AMELX PE=1 SV=2	1	hf1_10472_ebo_32_1_261219.ScanId;v=1;d1=24941.24941.4	controllerType=0 controllerNumber=1 scan=24941	50.3999
33781:4	1	S.M[+15.995]PLPPHPGHPGYINFSYEVLTPLKWYQ[+0.984].S		M[+16], Q[+1]	800.399	4	3198.57	3198.58	0	-0.4	17	Non	336.75	336.75	0.6	5.22	1651	>sp|P02817|AMELX_BOVIN Amelogenin, X isoform OS=Bos taurus OX=9913 GN=AMELX PE=1 SV=2	1	hf1_10472_ebo_32_1_261219.ScanId;v=1;d1=24815.24815.4	controllerType=0 controllerNumber=1 scan=24815	50.1797
34723:4	1	S.MPLPPHPGHPGYIN[+0.984]FSYEVLTPLKWYQ[+0.984].S		N[+1], Q[+1]	796.653	4	3183.59	3183.56	0	8	17	Non	337.26	337.26	337.26	5.88	1651	>sp|P02817|AMELX_BOVIN Amelogenin, X isoform OS=Bos taurus OX=9913 GN=AMELX PE=1 SV=2	1	hf1_10472_ebo_32_1_261219.ScanId;v=1;d1=25458.25458.4	controllerType=0 controllerNumber=1 scan=25458	51.3069
33458:4	1	S.MP[+15.995]LPPHPGHPGYIN[+0.984]FSYEVLTPLKWYQ.S		N[+1], P[+16]	800.403	4	3198.59	3198.58	0	4.7	17	Non	356.86	356.86	5.8	6.1	1651	>sp|P02817|AMELX_BOVIN Amelogenin, X isoform OS=Bos taurus OX=9913 GN=AMELX PE=1 SV=2	1	hf1_10472_ebo_32_1_261219.ScanId;v=1;d1=24606.24606.4	controllerType=0 controllerNumber=1 scan=24606	49.8188
32835:4	1	S.MP[+15.995]LPPHPGHPGYINFSYEVLTPLKWYQ[+0.984].S		P[+16], Q[+1]	800.403	4	3198.59	3198.58	0	4.9	17	Non	366.37	366.37	4	7.24	1651	>sp|P02817|AMELX_BOVIN Amelogenin, X isoform OS=Bos taurus OX=9913 GN=AMELX PE=1 SV=2	1	hf1_10472_ebo_32_1_261219.ScanId;v=1;d1=24204.24204.4	controllerType=0 controllerNumber=1 scan=24204	49.116
50031:3	1	S.MP[+15.995]LPPHPGHPGYINFS[+79.966]YEVLTPLKWYQ.S		P[+16], S[+80]	1093.2	3	3277.58	3277.56	0	5.7	17	Non	370.28	370.28	4	7.46	1651	>sp|P02817|AMELX_BOVIN Amelogenin, X isoform OS=Bos taurus OX=9913 GN=AMELX PE=1 SV=2	1	hf1_10472_ebo_32_1_261219.ScanId;v=1;d1=36448.36448.3	controllerType=0 controllerNumber=1 scan=36448	73.5469
35137:4	1	S.MPLPPHPGHPGYIN[+0.984]FSYEVLTPLKWYQ[+0.984].S		N[+1], Q[+1]	796.651	4	3183.58	3183.56	0	5.9	17	Non	462.58	437.61	437.61	7.32	1651	>sp|P02817|AMELX_BOVIN Amelogenin, X isoform OS=Bos taurus OX=9913 GN=AMELX PE=1 SV=2	1	hf1_10472_ebo_32_1_261219.ScanId;v=1;d1=25731.25731.4	controllerType=0 controllerNumber=1 scan=25731	51.7877
35203:3	1	S.M[+15.995]PLPPHPGHPGYINFS[+79.966]YEVLTPLKWYQ.S		M[+16], S[+80]	1093.19	3	3277.56	3277.56	0	1.7	17	Non	518.62	518.62	0.25	6.79	1651	>sp|P02817|AMELX_BOVIN Amelogenin, X isoform OS=Bos taurus OX=9913 GN=AMELX PE=1 SV=2	1	hf1_10472_ebo_32_1_261219.ScanId;v=1;d1=25778.25778.3	controllerType=0 controllerNumber=1 scan=25778	51.8721
36264:3	1	S.MPLPPHPGHPGYINFS[+79.966]YEVLTPLKWYQ[+0.984].S		Q[+1], S[+80]	1088.19	3	3262.57	3262.55	0	6.1	17	Non	811.86	811.86	60.57	13.97	1651	>sp|P02817|AMELX_BOVIN Amelogenin, X isoform OS=Bos taurus OX=9913 GN=AMELX PE=1 SV=2	1	hf1_10472_ebo_32_1_261219.ScanId;v=1;d1=26489.26489.3	controllerType=0 controllerNumber=1 scan=26489	53.131
33931:3	1	S.MP[+15.995]LPPHPGHPGYINFS[+79.966]YEVLTPLKWYQ.S		P[+16], S[+80]	1093.2	3	3277.58	3277.56	0	6.8	17	Non	831.68	831.68	2	13.97	1651	>sp|P02817|AMELX_BOVIN Amelogenin, X isoform OS=Bos taurus OX=9913 GN=AMELX PE=1 SV=2	1	hf1_10472_ebo_32_1_261219.ScanId;v=1;d1=24921.24921.3	controllerType=0 controllerNumber=1 scan=24921	50.3662
35947:3	1	S.MPLPPHPGHPGYINFS[+79.966]YEVLTPLKWYQ[+0.984].S		Q[+1], S[+80]	1088.2	3	3262.58	3262.55	0	9.5	17	Non	906.88	906.88	114.66	15.23	1651	>sp|P02817|AMELX_BOVIN Amelogenin, X isoform OS=Bos taurus OX=9913 GN=AMELX PE=1 SV=2	1	hf1_10472_ebo_32_1_261219.ScanId;v=1;d1=26279.26279.3	controllerType=0 controllerNumber=1 scan=26279	52.7581
34224:3	1	S.M[+15.995]PLPPHPGHPGYINFS[+79.966]YEVLTPLKWYQ.S		M[+16], S[+80]	1093.2	3	3277.58	3277.56	0	6.3	17	Non	980.95	980.95	20.41	16.97	1651	>sp|P02817|AMELX_BOVIN Amelogenin, X isoform OS=Bos taurus OX=9913 GN=AMELX PE=1 SV=2	1	hf1_10472_ebo_32_1_261219.ScanId;v=1;d1=25122.25122.3	controllerType=0 controllerNumber=1 scan=25122	50.7148
36903:4	1	S.MPLPPHPGHPGYIN[+0.984]FS[+79.966]YEVLTPLKWYQ[+0.984].S		N[+1], Q[+1], S[+80]	816.645	4	3263.56	3263.53	0	8.4	17	Non	88.93	49.58	49.58	2.29	1651	>sp|P02817|AMELX_BOVIN Amelogenin, X isoform OS=Bos taurus OX=9913 GN=AMELX PE=1 SV=2	1	hf1_10472_ebo_32_1_261219.ScanId;v=1;d1=26904.26904.4	controllerType=0 controllerNumber=1 scan=26904	53.8621
34302:3	1	S.MP[+15.995]LPPHPGHPGYINFS[+79.966]Y[+15.995]EVLTPLKWYQ.S		P[+16], S[+80], Y[+16]	1098.53	3	3293.58	3293.55	0	6.9	17	Non	106.35	106.35	0.96	2.33	1651	>sp|P02817|AMELX_BOVIN Amelogenin, X isoform OS=Bos taurus OX=9913 GN=AMELX PE=1 SV=2	1	hf1_10472_ebo_32_1_261219.ScanId;v=1;d1=25177.25177.3	controllerType=0 controllerNumber=1 scan=25177	50.8106
34575:3	1	S.MP[+31.990]LPPHPGHPGYIN[+0.984]FS[+79.966]YEVLTPLKWYQ.S		N[+1], P[+32], S[+80]	1098.85	3	3294.54	3294.54	0	2.3	17	Non	114.12	102.97	1.8	2.29	1651	>sp|P02817|AMELX_BOVIN Amelogenin, X isoform OS=Bos taurus OX=9913 GN=AMELX PE=1 SV=2	1	hf1_10472_ebo_32_1_261219.ScanId;v=1;d1=25359.25359.3	controllerType=0 controllerNumber=1 scan=25359	51.1312
32556:4	1	S.MP[+15.995]LPPHPGHPGYINFS[+79.966]YEVLTPLKW[+15.995]YQ.S		P[+16], S[+80], W[+16]	824.148	4	3293.57	3293.55	0	5.7	17	Non	131.96	131.96	0	1.47	1651	>sp|P02817|AMELX_BOVIN Amelogenin, X isoform OS=Bos taurus OX=9913 GN=AMELX PE=1 SV=2	1	hf1_10472_ebo_32_1_261219.ScanId;v=1;d1=24022.24022.4	controllerType=0 controllerNumber=1 scan=24022	48.7984
35286:4	1	S.MP[+15.995]LPPHPGHPGYINFS[+79.966]YEVLTPLKWYQ[+0.984].S		P[+16], Q[+1], S[+80]	820.395	4	3278.56	3278.54	0	5	17	Non	153.9	153.9	3.29	2.42	1651	>sp|P02817|AMELX_BOVIN Amelogenin, X isoform OS=Bos taurus OX=9913 GN=AMELX PE=1 SV=2	1	hf1_10472_ebo_32_1_261219.ScanId;v=1;d1=25835.25835.4	controllerType=0 controllerNumber=1 scan=25835	51.9729
35870:4	1	S.MP[+15.995]LPPHPGHPGYINFS[+79.966]YEVLTPLKWYQ[+0.984].S		P[+16], Q[+1], S[+80]	820.394	4	3278.55	3278.54	0	3.5	17	Non	174.26	174.26	5.8	3.41	1651	>sp|P02817|AMELX_BOVIN Amelogenin, X isoform OS=Bos taurus OX=9913 GN=AMELX PE=1 SV=2	1	hf1_10472_ebo_32_1_261219.ScanId;v=1;d1=26232.26232.4	controllerType=0 controllerNumber=1 scan=26232	52.6735
37230:4	1	S.MPLPPHPGHPGYIN[+0.984]FS[+79.966]YEVLTPLKWYQ[+0.984].S		N[+1], Q[+1], S[+80]	816.645	4	3263.56	3263.53	0	7.7	17	Non	176.81	152.53	152.53	2.68	1651	>sp|P02817|AMELX_BOVIN Amelogenin, X isoform OS=Bos taurus OX=9913 GN=AMELX PE=1 SV=2	1	hf1_10472_ebo_32_1_261219.ScanId;v=1;d1=27113.27113.4	controllerType=0 controllerNumber=1 scan=27113	54.2312
34834:4	1	S.MP[+15.995]LPPHPGHPGYINFS[+79.966]YEVLTPLKWYQ[+0.984].S		P[+16], Q[+1], S[+80]	820.396	4	3278.56	3278.54	0	6.2	17	Non	181.98	181.98	4	3.67	1651	>sp|P02817|AMELX_BOVIN Amelogenin, X isoform OS=Bos taurus OX=9913 GN=AMELX PE=1 SV=2	1	hf1_10472_ebo_32_1_261219.ScanId;v=1;d1=25534.25534.4	controllerType=0 controllerNumber=1 scan=25534	51.4417
[truncated: 3,146 more rows]

## Sheet: Proteins
Protein Rank	Description	|Log Prob|	Best |Log Prob|	Best score	Total Intensity	# of spectra	# of unique peptides	# of mod peptides	Coverage %	# AA's in protein	Protein DB number
[truncated: 4 more rows]
