# Supplementary material for: A Peptidomics Method for Assessing Sex from Modern and Ancient Bovine Tooth Enamel.
Source: Research Square preprint supplement (doi:10.21203/rs.3.rs-3766361/v1), 2024-01-29
Supplement: Supplementary file 4 [file 24b548e3f2b21640015679d4.xlsx]

## Sheet: Summary
Summary:
	1) Input data file: H:\Proteomics\Projects\Boaretto\INCPM_10472\Raw_files\HF1_10472_EBO_24_1_261219.raw
	2) Protein database: H:\Proteomics\Projects\Boaretto\INCPM_18273\AMELs Cattle fasta Pau 2.Fasta
	3) Parameter file: D:\Boaretto\HF1_10472_EBO_24_1_261219.raw_20230417_Amel\objs\params.prf
	4) Date/Time: April 17, 2023 11:37:25 PM IDT
	5) RunTime: 4 hours, 42 minutes, 3 seconds; on 34 cores
Summary Statistics:
	1) Reporting 2 forward and 2 reverse proteins
	2) 1606 unique forward peptides
	3) 3464 spectra matched to forward peptides
	4) Estimated spectrum-level FDR on true proteins is 0.4%
Recorded protein search configuration:
Num	Rule	Value
0	Protein database	H:\Proteomics\Projects\Boaretto\INCPM_18273\AMELs Cattle fasta Pau 2.Fasta
1	Spectrum-level FDR	Auto cut
2	Cleavage residues	KR
3	Digest cutter	C-terminal cutter
4	Peptide termini	Non specific
5	Maximum number of missed cleavages	Any missed cleavages (-1)
6	Precursor tolerance	10.0 ppm
7	Fragment tolerance	frag:qtof_hcd 20.0 ppm
8	Fragment tolerance version	2
9	Charges applied to charge-unassigned spectra:	1,2,3
10	Precursor mass max	7500.0
11	N-glycan search	None
12	O-glycan search	None
13	Off by x isotopes	-2,-1,0,+1,+2
14	Contaminants added	false
15	Decoys added	true
16	%Additional parameters:
17	Disulfide Enable	false
18	Trisulfide Enable	false
19	DSS Crosslink Enable	false
20	Custom Crosslink Enable	false
21	Wildcard Enable	0
22	Combyne cut off score	Auto
23	Protein FDR cutoff	1%
24	Focused DB created	true
25	Export mzIdentML	true
26	Score version	2
27	precursor_assignment_flags	2
28	po_NumberMonosReturn	2
29	Lock mass list	None
30	do_quick_rejects	0
31	%Modification searches:
32	common_modifications_max	2
33	rare_modifications_max	2
34	%Fixed and variable modifications:
35	Oxidation / +15.994915 @ F, H, K, M, P, W, Y | common2
36	Deamidated / +0.984016 @ N, Q, R | common2
37	Acetyl / +42.010565 @ Protein NTerm | rare1
38	Dioxidation / +31.989829 @ F, M, P, W, Y | rare2
39	Gln->pyro-Glu / -17.026549 @ Protein NTerm Q | rare1
40	Glu->pyro-Glu / -18.010565 @ Protein NTerm E | rare1
41	Phospho / +79.966331 @ S | rare1
42	% Custom modification text below
43	%Glycan modifications:
44	% Custom modification text below
45	Show all N-glycopeptides	0
46	%Addition parameters:
47	Product Version	PMI-Byonic-Com:v4.6.1
48	Registered to	david Morgenstern G-INCPM

## Sheet: Spectra
Query #:z	Protein Rank	Peptide < ProteinMetrics Confidential >	Glycans NHFAGNa	Modification Type(s)	Observed m/z	z	Observed (M+H)	Calc. mass (M+H)	Off-by-x error	Mass error (ppm)	Starting position	Cleavage	Score	Delta	Delta Mod	|Log Prob|	# of unique peptides	Protein Name	Protein DB number	Comment	Scan #	Scan Time
19813:4	1	T.W[+15.995]ILF[+31.990]ACLLGAAFSM[+15.995]PLPPHPGHPGYINF.S		F[+32], M[+16], W[+16]	783.391	4	3130.54	3130.53	0	3.7	4	Non	207.12	2.91	2.91	1.22	1304	>sp|P02817|AMELX_BOVIN Amelogenin, X isoform OS=Bos taurus OX=9913 GN=AMELX PE=1 SV=2	1	hf1_10472_ebo_24_1_261219.ScanId;v=1;d1=15614.15614.4	controllerType=0 controllerNumber=1 scan=15614	35.7988
19551:3	1	T.W[+15.995]ILF[+31.990]ACLLGAAFSMP[+15.995]LPPHPGHPGYINFS[+79.966].Y		F[+32], P[+16], S[+80], W[+16]	1099.85	3	3297.54	3297.53	0	4.2	4	Non	130.23	13.07	4	2.19	1304	>sp|P02817|AMELX_BOVIN Amelogenin, X isoform OS=Bos taurus OX=9913 GN=AMELX PE=1 SV=2	1	hf1_10472_ebo_24_1_261219.ScanId;v=1;d1=15428.15428.3	controllerType=0 controllerNumber=1 scan=15428	35.4791
29367:6	1	T.WILFACLLGAAFSM[+15.995]PLPPHPGHPGYINFS[+79.966]YEVLTPLK.W		M[+16], S[+80]	699.687	6	4193.09	4193.08	0	0.7	4	NRagged	154.45	1.37	1.37	1.64	1304	>sp|P02817|AMELX_BOVIN Amelogenin, X isoform OS=Bos taurus OX=9913 GN=AMELX PE=1 SV=2	1	hf1_10472_ebo_24_1_261219.ScanId;v=1;d1=22101.22101.4	controllerType=0 controllerNumber=1 scan=22101	47.0728
22720:3	1	F.ACLLGAAFSMPLPPHPGHPGYINF.S			836.414	3	2507.23	2507.24	0	-3.5	8	Non	288.29	258.11	258.11	3.31	1304	>sp|P02817|AMELX_BOVIN Amelogenin, X isoform OS=Bos taurus OX=9913 GN=AMELX PE=1 SV=2	1	hf1_10472_ebo_24_1_261219.ScanId;v=1;d1=17550.17550.2	controllerType=0 controllerNumber=1 scan=17550	39.1441
30661:4	1	A.FSM[+31.990]PLP[+31.990]PHPGHPGYINFSYEVLTPLK.W		M[+32], P[+32]	751.368	4	3002.45	3002.48	0	-8.8	15	NRagged	237.03	22.38	6.19	1.51	1304	>sp|P02817|AMELX_BOVIN Amelogenin, X isoform OS=Bos taurus OX=9913 GN=AMELX PE=1 SV=2	1	hf1_10472_ebo_24_1_261219.ScanId;v=1;d1=22935.22935.2	controllerType=0 controllerNumber=1 scan=22935	48.5453
19542:3	1	F.SM[+15.995]PLPPHPGHPGYINF.S		M[+16]	592.959	3	1776.86	1776.85	0	5.7	16	Non	226.47	135.65	44.86	1.91	1304	>sp|P02817|AMELX_BOVIN Amelogenin, X isoform OS=Bos taurus OX=9913 GN=AMELX PE=1 SV=2	1	hf1_10472_ebo_24_1_261219.ScanId;v=1;d1=15421.15421.3	controllerType=0 controllerNumber=1 scan=15421	35.4661
19231:3	1	F.SM[+15.995]PLPPHPGHPGYINF.S		M[+16]	592.96	3	1776.86	1776.85	0	6.4	16	Non	271.18	109.76	84.39	2.41	1304	>sp|P02817|AMELX_BOVIN Amelogenin, X isoform OS=Bos taurus OX=9913 GN=AMELX PE=1 SV=2	1	hf1_10472_ebo_24_1_261219.ScanId;v=1;d1=15199.15199.3	controllerType=0 controllerNumber=1 scan=15199	35.0853
31661:3	1	F.SM[+15.995]PLPPHPGHP[+31.990]GY[+31.990]INF[+15.995]SYEVLTPL.K		F[+16], M[+16], P[+32], Y[+32]	920.442	3	2759.31	2759.3	0	3	16	Non	157.3	157.3	1.74	1.5	1304	>sp|P02817|AMELX_BOVIN Amelogenin, X isoform OS=Bos taurus OX=9913 GN=AMELX PE=1 SV=2	1	hf1_10472_ebo_24_1_261219.ScanId;v=1;d1=23591.23591.3	controllerType=0 controllerNumber=1 scan=23591	49.7042
27344:4	1	F.SMPLPPHPGHPGYIN[+0.984]FS[+79.966]YEVLTPLK.W		N[+1], S[+80]	718.857	4	2872.4	2872.38	0	9.3	16	NRagged	181.66	181.66	101.1	3.21	1304	>sp|P02817|AMELX_BOVIN Amelogenin, X isoform OS=Bos taurus OX=9913 GN=AMELX PE=1 SV=2	1	hf1_10472_ebo_24_1_261219.ScanId;v=1;d1=20716.20716.4	controllerType=0 controllerNumber=1 scan=20716	44.622
28435:3	1	F.SM[+15.995]PLPPHPGHPGYINFS[+79.966]YEVLTPLK.W		M[+16], S[+80]	963.139	3	2887.4	2887.39	0	4.3	16	NRagged	372.18	372.18	87.16	6.48	1304	>sp|P02817|AMELX_BOVIN Amelogenin, X isoform OS=Bos taurus OX=9913 GN=AMELX PE=1 SV=2	1	hf1_10472_ebo_24_1_261219.ScanId;v=1;d1=21489.21489.3	controllerType=0 controllerNumber=1 scan=21489	45.9969
27445:3	1	F.SM[+15.995]PLPPHPGHPGYINFS[+79.966]YEVLTPLK.W		M[+16], S[+80]	963.14	3	2887.41	2887.39	0	6.2	16	NRagged	463.99	463.99	150.71	6.78	1304	>sp|P02817|AMELX_BOVIN Amelogenin, X isoform OS=Bos taurus OX=9913 GN=AMELX PE=1 SV=2	1	hf1_10472_ebo_24_1_261219.ScanId;v=1;d1=20793.20793.3	controllerType=0 controllerNumber=1 scan=20793	44.7597
27650:4	1	F.SM[+15.995]PLPPHPGHPGYINFS[+79.966]YEVLTPLK.W		M[+16], S[+80]	722.607	4	2887.41	2887.39	0	6.4	16	NRagged	478.24	478.24	80.16	7.58	1304	>sp|P02817|AMELX_BOVIN Amelogenin, X isoform OS=Bos taurus OX=9913 GN=AMELX PE=1 SV=2	1	hf1_10472_ebo_24_1_261219.ScanId;v=1;d1=20937.20937.4	controllerType=0 controllerNumber=1 scan=20937	45.0136
27093:4	1	F.SM[+15.995]PLPPHPGHPGYINFS[+79.966]YEVLTPLK.W		M[+16], S[+80]	722.607	4	2887.41	2887.39	0	6.4	16	NRagged	631.36	631.36	62.01	9.52	1304	>sp|P02817|AMELX_BOVIN Amelogenin, X isoform OS=Bos taurus OX=9913 GN=AMELX PE=1 SV=2	1	hf1_10472_ebo_24_1_261219.ScanId;v=1;d1=20534.20534.4	controllerType=0 controllerNumber=1 scan=20534	44.3068
27206:3	1	F.SM[+15.995]PLPPHPGHPGYINFS[+79.966]YEVLTPLK.W		M[+16], S[+80]	963.141	3	2887.41	2887.39	0	7	16	NRagged	636.92	636.92	207.15	9.63	1304	>sp|P02817|AMELX_BOVIN Amelogenin, X isoform OS=Bos taurus OX=9913 GN=AMELX PE=1 SV=2	1	hf1_10472_ebo_24_1_261219.ScanId;v=1;d1=20617.20617.3	controllerType=0 controllerNumber=1 scan=20617	44.4518
27471:3	1	F.SM[+15.995]PLPPHPGHPGYINFS[+79.966]YEVLTPLK.W		M[+16], S[+80]	963.14	3	2887.41	2887.39	0	5.9	16	NRagged	699.9	699.9	142.14	10.4	1304	>sp|P02817|AMELX_BOVIN Amelogenin, X isoform OS=Bos taurus OX=9913 GN=AMELX PE=1 SV=2	1	hf1_10472_ebo_24_1_261219.ScanId;v=1;d1=20812.20812.3	controllerType=0 controllerNumber=1 scan=20812	44.7937
28232:4	1	F.SM[+15.995]PLPPHPGHPGYIN[+0.984]FS[+79.966]YEVLTPLK.W		M[+16], N[+1], S[+80]	722.855	4	2888.4	2888.37	0	8.2	16	NRagged	165.49	165.49	64.67	4.01	1304	>sp|P02817|AMELX_BOVIN Amelogenin, X isoform OS=Bos taurus OX=9913 GN=AMELX PE=1 SV=2	1	hf1_10472_ebo_24_1_261219.ScanId;v=1;d1=21350.21350.4	controllerType=0 controllerNumber=1 scan=21350	45.7458
27769:3	1	F.SM[+15.995]PLPPHPGHP[+15.995]GY[+31.990]INF[+31.990]SYEVLTPLK.W		F[+32], M[+16], P[+16], Y[+32]	963.145	3	2887.42	2887.4	0	7.8	16	NRagged	332.09	332.09	0.9	5.8	1304	>sp|P02817|AMELX_BOVIN Amelogenin, X isoform OS=Bos taurus OX=9913 GN=AMELX PE=1 SV=2	1	hf1_10472_ebo_24_1_261219.ScanId;v=1;d1=21025.21025.3	controllerType=0 controllerNumber=1 scan=21025	45.1713
34388:3	1	F.SM[+15.995]PLPPHPGHPGYINFS[+79.966]YEVLTPLKWY.Q		M[+16], S[+80]	1079.52	3	3236.55	3236.53	0	4.8	16	Non	95.09	95.09	16.25	1.75	1304	>sp|P02817|AMELX_BOVIN Amelogenin, X isoform OS=Bos taurus OX=9913 GN=AMELX PE=1 SV=2	1	hf1_10472_ebo_24_1_261219.ScanId;v=1;d1=25430.25430.4	controllerType=0 controllerNumber=1 scan=25430	53.0165
34046:4	1	F.SM[+15.995]PLPPHPGHP[+31.990]GY[+31.990]INF[+15.995]SYEVLTPLKWY.Q		F[+16], M[+16], P[+32], Y[+32]	809.894	4	3236.55	3236.54	0	4.1	16	Non	113.45	113.45	2.2	1.25	1304	>sp|P02817|AMELX_BOVIN Amelogenin, X isoform OS=Bos taurus OX=9913 GN=AMELX PE=1 SV=2	1	hf1_10472_ebo_24_1_261219.ScanId;v=1;d1=25203.25203.4	controllerType=0 controllerNumber=1 scan=25203	52.6112
05828:1	1	S.M[+15.995]PLPPH.P		M[+16]	707.359	1	707.359	707.355	0	6.3	17	Non	239.15	239.15	28.09	2.35	1304	>sp|P02817|AMELX_BOVIN Amelogenin, X isoform OS=Bos taurus OX=9913 GN=AMELX PE=1 SV=2	1	hf1_10472_ebo_24_1_261219.ScanId;v=1;d1=6104.6104.2	controllerType=0 controllerNumber=1 scan=6104	19.3694
14341:2	1	S.MPLPPHP.G			394.714	2	788.42	788.412	0	9.7	17	Non	267.58	193.4	193.4	2.34	1304	>sp|P02817|AMELX_BOVIN Amelogenin, X isoform OS=Bos taurus OX=9913 GN=AMELX PE=1 SV=2	1	hf1_10472_ebo_24_1_261219.ScanId;v=1;d1=11823.11823.2	controllerType=0 controllerNumber=1 scan=11823	29.2707
14760:2	1	S.MPLPPHP.G			394.712	2	788.417	788.412	0	5.6	17	Non	329.61	181.85	181.85	2.75	1304	>sp|P02817|AMELX_BOVIN Amelogenin, X isoform OS=Bos taurus OX=9913 GN=AMELX PE=1 SV=2	1	hf1_10472_ebo_24_1_261219.ScanId;v=1;d1=12097.12097.2	controllerType=0 controllerNumber=1 scan=12097	29.7458
11024:2	1	S.M[+15.995]PLPPHP.G		M[+16]	402.709	2	804.412	804.407	0	5.2	17	Non	230.47	165.64	65.2	2.19	1304	>sp|P02817|AMELX_BOVIN Amelogenin, X isoform OS=Bos taurus OX=9913 GN=AMELX PE=1 SV=2	1	hf1_10472_ebo_24_1_261219.ScanId;v=1;d1=9613.9613.3	controllerType=0 controllerNumber=1 scan=9613	25.427
10419:2	1	S.M[+15.995]PLPPHP.G		M[+16]	402.709	2	804.411	804.407	0	5.2	17	Non	395.65	220.97	69.95	2.92	1304	>sp|P02817|AMELX_BOVIN Amelogenin, X isoform OS=Bos taurus OX=9913 GN=AMELX PE=1 SV=2	1	hf1_10472_ebo_24_1_261219.ScanId;v=1;d1=9207.9207.2	controllerType=0 controllerNumber=1 scan=9207	24.725
08340:2	1	S.M[+15.995]PLPPHP.G		M[+16]	402.709	2	804.412	804.407	0	5.2	17	Non	418.67	213.15	93	2.88	1304	>sp|P02817|AMELX_BOVIN Amelogenin, X isoform OS=Bos taurus OX=9913 GN=AMELX PE=1 SV=2	1	hf1_10472_ebo_24_1_261219.ScanId;v=1;d1=7811.7811.2	controllerType=0 controllerNumber=1 scan=7811	22.3107
10723:2	1	S.M[+15.995]PLPPHP.G		M[+16]	402.709	2	804.412	804.407	0	5.4	17	Non	428.99	263.36	85.79	2.96	1304	>sp|P02817|AMELX_BOVIN Amelogenin, X isoform OS=Bos taurus OX=9913 GN=AMELX PE=1 SV=2	1	hf1_10472_ebo_24_1_261219.ScanId;v=1;d1=9411.9411.2	controllerType=0 controllerNumber=1 scan=9411	25.0811
10114:2	1	S.M[+15.995]PLPPHP.G		M[+16]	402.71	2	804.412	804.407	0	5.9	17	Non	432.56	278	80.7	2.96	1304	>sp|P02817|AMELX_BOVIN Amelogenin, X isoform OS=Bos taurus OX=9913 GN=AMELX PE=1 SV=2	1	hf1_10472_ebo_24_1_261219.ScanId;v=1;d1=9006.9006.2	controllerType=0 controllerNumber=1 scan=9006	24.3751
09497:2	1	S.M[+15.995]PLPPHP.G		M[+16]	402.71	2	804.413	804.407	0	6.5	17	Non	442.4	268.16	82.01	3.35	1304	>sp|P02817|AMELX_BOVIN Amelogenin, X isoform OS=Bos taurus OX=9913 GN=AMELX PE=1 SV=2	1	hf1_10472_ebo_24_1_261219.ScanId;v=1;d1=8602.8602.2	controllerType=0 controllerNumber=1 scan=8602	23.6737
08917:2	1	S.M[+15.995]PLPPHP.G		M[+16]	402.71	2	804.412	804.407	0	6	17	Non	456.02	291.67	96.9	3.3	1304	>sp|P02817|AMELX_BOVIN Amelogenin, X isoform OS=Bos taurus OX=9913 GN=AMELX PE=1 SV=2	1	hf1_10472_ebo_24_1_261219.ScanId;v=1;d1=8206.8206.2	controllerType=0 controllerNumber=1 scan=8206	22.9886
08626:2	1	S.M[+15.995]PLPPHP.G		M[+16]	402.709	2	804.412	804.407	0	5.6	17	Non	457.27	306.63	114.21	3.52	1304	>sp|P02817|AMELX_BOVIN Amelogenin, X isoform OS=Bos taurus OX=9913 GN=AMELX PE=1 SV=2	1	hf1_10472_ebo_24_1_261219.ScanId;v=1;d1=8008.8008.2	controllerType=0 controllerNumber=1 scan=8008	22.6485
09807:2	1	S.M[+15.995]PLPPHP.G		M[+16]	402.71	2	804.412	804.407	0	5.8	17	Non	458.4	287.65	90.31	3.12	1304	>sp|P02817|AMELX_BOVIN Amelogenin, X isoform OS=Bos taurus OX=9913 GN=AMELX PE=1 SV=2	1	hf1_10472_ebo_24_1_261219.ScanId;v=1;d1=8804.8804.2	controllerType=0 controllerNumber=1 scan=8804	24.0248
09213:2	1	S.M[+15.995]PLPPHP.G		M[+16]	402.71	2	804.413	804.407	0	6.9	17	Non	476.12	296.5	100.36	3.34	1304	>sp|P02817|AMELX_BOVIN Amelogenin, X isoform OS=Bos taurus OX=9913 GN=AMELX PE=1 SV=2	1	hf1_10472_ebo_24_1_261219.ScanId;v=1;d1=8404.8404.2	controllerType=0 controllerNumber=1 scan=8404	23.3328
12785:2	1	S.MPLPPHPG.H			423.223	2	845.438	845.434	0	4.7	17	Non	301.68	301.68	301.68	2.97	1304	>sp|P02817|AMELX_BOVIN Amelogenin, X isoform OS=Bos taurus OX=9913 GN=AMELX PE=1 SV=2	1	hf1_10472_ebo_24_1_261219.ScanId;v=1;d1=10811.10811.2	controllerType=0 controllerNumber=1 scan=10811	27.5143
14009:2	1	S.MPLPPHPG.H			423.223	2	845.439	845.434	0	6	17	Non	322.56	322.56	322.56	3.23	1304	>sp|P02817|AMELX_BOVIN Amelogenin, X isoform OS=Bos taurus OX=9913 GN=AMELX PE=1 SV=2	1	hf1_10472_ebo_24_1_261219.ScanId;v=1;d1=11612.11612.2	controllerType=0 controllerNumber=1 scan=11612	28.9043
14325:2	1	S.MPLPPHPG.H			423.223	2	845.439	845.434	0	6.1	17	Non	366.56	366.56	366.56	3.96	1304	>sp|P02817|AMELX_BOVIN Amelogenin, X isoform OS=Bos taurus OX=9913 GN=AMELX PE=1 SV=2	1	hf1_10472_ebo_24_1_261219.ScanId;v=1;d1=11814.11814.2	controllerType=0 controllerNumber=1 scan=11814	29.2577
13087:2	1	S.MPLPPHPG.H			423.223	2	845.439	845.434	0	5.9	17	Non	385.53	385.53	385.53	4.16	1304	>sp|P02817|AMELX_BOVIN Amelogenin, X isoform OS=Bos taurus OX=9913 GN=AMELX PE=1 SV=2	1	hf1_10472_ebo_24_1_261219.ScanId;v=1;d1=11012.11012.2	controllerType=0 controllerNumber=1 scan=11012	27.8636
13700:2	1	S.MPLPPHPG.H			423.223	2	845.438	845.434	0	5.5	17	Non	404.35	359.22	359.22	3.01	1304	>sp|P02817|AMELX_BOVIN Amelogenin, X isoform OS=Bos taurus OX=9913 GN=AMELX PE=1 SV=2	1	hf1_10472_ebo_24_1_261219.ScanId;v=1;d1=11413.11413.2	controllerType=0 controllerNumber=1 scan=11413	28.5618
13399:2	1	S.MPLPPHPG.H			423.223	2	845.44	845.434	0	6.8	17	Non	421.7	327.35	327.35	3.22	1304	>sp|P02817|AMELX_BOVIN Amelogenin, X isoform OS=Bos taurus OX=9913 GN=AMELX PE=1 SV=2	1	hf1_10472_ebo_24_1_261219.ScanId;v=1;d1=11215.11215.2	controllerType=0 controllerNumber=1 scan=11215	28.2178
00016:2	1	S.M[+15.995]PLPPHPG.H		M[+16]	431.221	2	861.435	861.429	0	7	17	Non	143.06	143.06	33.63	1.41	1304	>sp|P02817|AMELX_BOVIN Amelogenin, X isoform OS=Bos taurus OX=9913 GN=AMELX PE=1 SV=2	1	hf1_10472_ebo_24_1_261219.ScanId;v=1;d1=27.27.2	controllerType=0 controllerNumber=1 scan=27	0.1188
47032:2	1	S.M[+15.995]PLPPHPG.H		M[+16]	431.22	2	861.433	861.429	0	5.1	17	Non	225.05	225.05	87.08	2.3	1304	>sp|P02817|AMELX_BOVIN Amelogenin, X isoform OS=Bos taurus OX=9913 GN=AMELX PE=1 SV=2	1	hf1_10472_ebo_24_1_261219.ScanId;v=1;d1=34640.34640.2	controllerType=0 controllerNumber=1 scan=34640	73.3264
07519:1	1	S.M[+15.995]PLPPHPG.H		M[+16]	861.434	1	861.434	861.429	0	6.1	17	Non	341.06	283.71	59.02	3.27	1304	>sp|P02817|AMELX_BOVIN Amelogenin, X isoform OS=Bos taurus OX=9913 GN=AMELX PE=1 SV=2	1	hf1_10472_ebo_24_1_261219.ScanId;v=1;d1=7259.7259.3	controllerType=0 controllerNumber=1 scan=7259	21.3586
07358:2	1	S.M[+15.995]PLPPHPG.H		M[+16]	431.221	2	861.434	861.429	0	6.5	17	Non	395.53	319.88	91.98	3.38	1304	>sp|P02817|AMELX_BOVIN Amelogenin, X isoform OS=Bos taurus OX=9913 GN=AMELX PE=1 SV=2	1	hf1_10472_ebo_24_1_261219.ScanId;v=1;d1=7150.7150.2	controllerType=0 controllerNumber=1 scan=7150	21.1695
07655:2	1	S.M[+15.995]PLPPHPG.H		M[+16]	431.221	2	861.434	861.429	0	6.5	17	Non	421.83	362.1	96.7	4.98	1304	>sp|P02817|AMELX_BOVIN Amelogenin, X isoform OS=Bos taurus OX=9913 GN=AMELX PE=1 SV=2	1	hf1_10472_ebo_24_1_261219.ScanId;v=1;d1=7349.7349.2	controllerType=0 controllerNumber=1 scan=7349	21.5167
07959:2	1	S.M[+15.995]PLPPHPG.H		M[+16]	431.221	2	861.435	861.429	0	6.8	17	Non	430.64	401.29	97.58	4.98	1304	>sp|P02817|AMELX_BOVIN Amelogenin, X isoform OS=Bos taurus OX=9913 GN=AMELX PE=1 SV=2	1	hf1_10472_ebo_24_1_261219.ScanId;v=1;d1=7547.7547.2	controllerType=0 controllerNumber=1 scan=7547	21.8565
08822:2	1	S.M[+15.995]PLPPHPG.H		M[+16]	431.221	2	861.435	861.429	0	6.8	17	Non	431.01	353.34	94.59	3.41	1304	>sp|P02817|AMELX_BOVIN Amelogenin, X isoform OS=Bos taurus OX=9913 GN=AMELX PE=1 SV=2	1	hf1_10472_ebo_24_1_261219.ScanId;v=1;d1=8140.8140.2	controllerType=0 controllerNumber=1 scan=8140	22.8741
08240:2	1	S.M[+15.995]PLPPHPG.H		M[+16]	431.221	2	861.434	861.429	0	6.1	17	Non	436.13	373.01	100.87	3.88	1304	>sp|P02817|AMELX_BOVIN Amelogenin, X isoform OS=Bos taurus OX=9913 GN=AMELX PE=1 SV=2	1	hf1_10472_ebo_24_1_261219.ScanId;v=1;d1=7745.7745.2	controllerType=0 controllerNumber=1 scan=7745	22.1978
09113:2	1	S.M[+15.995]PLPPHPG.H		M[+16]	431.221	2	861.436	861.429	0	8	17	Non	438.82	382.43	96.38	4.3	1304	>sp|P02817|AMELX_BOVIN Amelogenin, X isoform OS=Bos taurus OX=9913 GN=AMELX PE=1 SV=2	1	hf1_10472_ebo_24_1_261219.ScanId;v=1;d1=8338.8338.2	controllerType=0 controllerNumber=1 scan=8338	23.2177
08533:2	1	S.M[+15.995]PLPPHPG.H		M[+16]	431.221	2	861.435	861.429	0	7	17	Non	443.04	376.61	100.74	4.72	1304	>sp|P02817|AMELX_BOVIN Amelogenin, X isoform OS=Bos taurus OX=9913 GN=AMELX PE=1 SV=2	1	hf1_10472_ebo_24_1_261219.ScanId;v=1;d1=7942.7942.2	controllerType=0 controllerNumber=1 scan=7942	22.536
09400:2	1	S.M[+15.995]PLPPHPG.H		M[+16]	431.221	2	861.435	861.429	0	6.8	17	Non	456.45	372.76	118.76	4.49	1304	>sp|P02817|AMELX_BOVIN Amelogenin, X isoform OS=Bos taurus OX=9913 GN=AMELX PE=1 SV=2	1	hf1_10472_ebo_24_1_261219.ScanId;v=1;d1=8536.8536.2	controllerType=0 controllerNumber=1 scan=8536	23.5599
10618:2	1	S.MPLPPHPGH.P			491.752	2	982.497	982.493	0	4.6	17	Non	265.69	265.69	265.69	2.8	1304	>sp|P02817|AMELX_BOVIN Amelogenin, X isoform OS=Bos taurus OX=9913 GN=AMELX PE=1 SV=2	1	hf1_10472_ebo_24_1_261219.ScanId;v=1;d1=9342.9342.2	controllerType=0 controllerNumber=1 scan=9342	24.9596
09430:2	1	S.MPLPPHPGH.P			491.754	2	982.5	982.493	0	7.7	17	Non	356.02	290.79	290.79	3.5	1304	>sp|P02817|AMELX_BOVIN Amelogenin, X isoform OS=Bos taurus OX=9913 GN=AMELX PE=1 SV=2	1	hf1_10472_ebo_24_1_261219.ScanId;v=1;d1=8556.8556.2	controllerType=0 controllerNumber=1 scan=8556	23.5912
09728:2	1	S.MPLPPHPGH.P			491.753	2	982.499	982.493	0	6.1	17	Non	376.45	363.08	363.08	4.08	1304	>sp|P02817|AMELX_BOVIN Amelogenin, X isoform OS=Bos taurus OX=9913 GN=AMELX PE=1 SV=2	1	hf1_10472_ebo_24_1_261219.ScanId;v=1;d1=8750.8750.3	controllerType=0 controllerNumber=1 scan=8750	23.9271
10121:2	1	S.MPLPPHPGH.P			491.753	2	982.499	982.493	0	6.1	17	Non	376.84	361.98	361.98	4.08	1304	>sp|P02817|AMELX_BOVIN Amelogenin, X isoform OS=Bos taurus OX=9913 GN=AMELX PE=1 SV=2	1	hf1_10472_ebo_24_1_261219.ScanId;v=1;d1=9012.9012.2	controllerType=0 controllerNumber=1 scan=9012	24.3857
09402:2	1	S.MPLPPHPGH.P			491.753	2	982.499	982.493	0	6.6	17	Non	398.42	350.12	350.12	3.56	1304	>sp|P02817|AMELX_BOVIN Amelogenin, X isoform OS=Bos taurus OX=9913 GN=AMELX PE=1 SV=2	1	hf1_10472_ebo_24_1_261219.ScanId;v=1;d1=8537.8537.2	controllerType=0 controllerNumber=1 scan=8537	23.5613
06441:2	1	S.M[+15.995]PLPPHPGH.P		M[+16]	499.751	2	998.494	998.488	0	6.5	17	Non	417.12	369.87	74.33	4.42	1304	>sp|P02817|AMELX_BOVIN Amelogenin, X isoform OS=Bos taurus OX=9913 GN=AMELX PE=1 SV=2	1	hf1_10472_ebo_24_1_261219.ScanId;v=1;d1=6525.6525.2	controllerType=0 controllerNumber=1 scan=6525	20.0903
04050:2	1	S.M[+15.995]PLPPHPGH.P		M[+16]	499.751	2	998.494	998.488	0	6.5	17	Non	435.6	404.95	82.25	4.23	1304	>sp|P02817|AMELX_BOVIN Amelogenin, X isoform OS=Bos taurus OX=9913 GN=AMELX PE=1 SV=2	1	hf1_10472_ebo_24_1_261219.ScanId;v=1;d1=4880.4880.2	controllerType=0 controllerNumber=1 scan=4880	17.2434
05186:2	1	S.M[+15.995]PLPPHPGH.P		M[+16]	499.75	2	998.493	998.488	0	5.3	17	Non	535.02	486	113.12	4.73	1304	>sp|P02817|AMELX_BOVIN Amelogenin, X isoform OS=Bos taurus OX=9913 GN=AMELX PE=1 SV=2	1	hf1_10472_ebo_24_1_261219.ScanId;v=1;d1=5671.5671.2	controllerType=0 controllerNumber=1 scan=5671	18.6132
04935:2	1	S.M[+15.995]PLPPHPGH.P		M[+16]	499.75	2	998.493	998.488	0	5.3	17	Non	537.97	475.43	108.96	5.18	1304	>sp|P02817|AMELX_BOVIN Amelogenin, X isoform OS=Bos taurus OX=9913 GN=AMELX PE=1 SV=2	1	hf1_10472_ebo_24_1_261219.ScanId;v=1;d1=5479.5479.2	controllerType=0 controllerNumber=1 scan=5479	18.2753
05490:2	1	S.M[+15.995]PLPPHPGH.P		M[+16]	499.75	2	998.493	998.488	0	5.6	17	Non	546.78	484.46	112.19	4.73	1304	>sp|P02817|AMELX_BOVIN Amelogenin, X isoform OS=Bos taurus OX=9913 GN=AMELX PE=1 SV=2	1	hf1_10472_ebo_24_1_261219.ScanId;v=1;d1=5873.5873.2	controllerType=0 controllerNumber=1 scan=5873	18.9678
05781:2	1	S.M[+15.995]PLPPHPGH.P		M[+16]	499.75	2	998.494	998.488	0	6	17	Non	560.07	446.61	107.03	5.98	1304	>sp|P02817|AMELX_BOVIN Amelogenin, X isoform OS=Bos taurus OX=9913 GN=AMELX PE=1 SV=2	1	hf1_10472_ebo_24_1_261219.ScanId;v=1;d1=6074.6074.2	controllerType=0 controllerNumber=1 scan=6074	19.3188
04341:2	1	S.M[+15.995]PLPPHPGH.P		M[+16]	499.751	2	998.494	998.488	0	6.3	17	Non	562.34	497.51	121.95	6.22	1304	>sp|P02817|AMELX_BOVIN Amelogenin, X isoform OS=Bos taurus OX=9913 GN=AMELX PE=1 SV=2	1	hf1_10472_ebo_24_1_261219.ScanId;v=1;d1=5078.5078.2	controllerType=0 controllerNumber=1 scan=5078	17.586
04625:2	1	S.M[+15.995]PLPPHPGH.P		M[+16]	499.75	2	998.494	998.488	0	6.1	17	Non	575.59	509.97	121.59	5.98	1304	>sp|P02817|AMELX_BOVIN Amelogenin, X isoform OS=Bos taurus OX=9913 GN=AMELX PE=1 SV=2	1	hf1_10472_ebo_24_1_261219.ScanId;v=1;d1=5276.5276.2	controllerType=0 controllerNumber=1 scan=5276	17.925
07680:2	1	S.M[+15.995]PLPPHPGHP.G		M[+16]	548.277	2	1095.55	1095.54	0	5.7	17	Non	343.98	266.65	34.11	3.88	1304	>sp|P02817|AMELX_BOVIN Amelogenin, X isoform OS=Bos taurus OX=9913 GN=AMELX PE=1 SV=2	1	hf1_10472_ebo_24_1_261219.ScanId;v=1;d1=7364.7364.3	controllerType=0 controllerNumber=1 scan=7364	21.541
05923:2	1	S.M[+15.995]PLPPHPGHP.G		M[+16]	548.278	2	1095.55	1095.54	0	7.2	17	Non	439.33	300.46	55.08	4.2	1304	>sp|P02817|AMELX_BOVIN Amelogenin, X isoform OS=Bos taurus OX=9913 GN=AMELX PE=1 SV=2	1	hf1_10472_ebo_24_1_261219.ScanId;v=1;d1=6170.6170.2	controllerType=0 controllerNumber=1 scan=6170	19.4821
07481:2	1	S.M[+15.995]PLPPHPGHP.G		M[+16]	548.277	2	1095.55	1095.54	0	5.5	17	Non	537.41	365.17	58.15	5.95	1304	>sp|P02817|AMELX_BOVIN Amelogenin, X isoform OS=Bos taurus OX=9913 GN=AMELX PE=1 SV=2	1	hf1_10472_ebo_24_1_261219.ScanId;v=1;d1=7235.7235.2	controllerType=0 controllerNumber=1 scan=7235	21.3172
06461:2	1	S.M[+15.995]PLPPHPGHP.G		M[+16]	548.278	2	1095.55	1095.54	0	6.9	17	Non	568.57	389.54	81.37	6.99	1304	>sp|P02817|AMELX_BOVIN Amelogenin, X isoform OS=Bos taurus OX=9913 GN=AMELX PE=1 SV=2	1	hf1_10472_ebo_24_1_261219.ScanId;v=1;d1=6538.6538.2	controllerType=0 controllerNumber=1 scan=6538	20.112
07174:2	1	S.M[+15.995]PLPPHPGHP.G		M[+16]	548.277	2	1095.55	1095.54	0	6.4	17	Non	609.99	406.41	86.2	7.54	1304	>sp|P02817|AMELX_BOVIN Amelogenin, X isoform OS=Bos taurus OX=9913 GN=AMELX PE=1 SV=2	1	hf1_10472_ebo_24_1_261219.ScanId;v=1;d1=7029.7029.2	controllerType=0 controllerNumber=1 scan=7029	20.96
06752:2	1	S.M[+15.995]PLPPHPGHP.G		M[+16]	548.277	2	1095.55	1095.54	0	6.5	17	Non	646.97	402.57	83.78	7.99	1304	>sp|P02817|AMELX_BOVIN Amelogenin, X isoform OS=Bos taurus OX=9913 GN=AMELX PE=1 SV=2	1	hf1_10472_ebo_24_1_261219.ScanId;v=1;d1=6739.6739.2	controllerType=0 controllerNumber=1 scan=6739	20.4625
04992:2	1	S.MP[+15.995]LPPHPGH[+15.995]P.G		H[+16], P[+16]	556.274	2	1111.54	1111.54	0	5.2	17	Non	212	212	0.8	2.26	1304	>sp|P02817|AMELX_BOVIN Amelogenin, X isoform OS=Bos taurus OX=9913 GN=AMELX PE=1 SV=2	1	hf1_10472_ebo_24_1_261219.ScanId;v=1;d1=5524.5524.2	controllerType=0 controllerNumber=1 scan=5524	18.3492
09592:3	1	S.MPLPPHPGHPG.Y			379.529	3	1136.57	1136.57	0	5.7	17	Non	385.32	305.29	305.29	3.94	1304	>sp|P02817|AMELX_BOVIN Amelogenin, X isoform OS=Bos taurus OX=9913 GN=AMELX PE=1 SV=2	1	hf1_10472_ebo_24_1_261219.ScanId;v=1;d1=8662.8662.3	controllerType=0 controllerNumber=1 scan=8662	23.7748
10811:3	1	S.MPLPPHPGHPG.Y			379.529	3	1136.57	1136.57	0	4.2	17	Non	400.68	400.68	400.68	5.07	1304	>sp|P02817|AMELX_BOVIN Amelogenin, X isoform OS=Bos taurus OX=9913 GN=AMELX PE=1 SV=2	1	hf1_10472_ebo_24_1_261219.ScanId;v=1;d1=9468.9468.3	controllerType=0 controllerNumber=1 scan=9468	25.1767
09895:3	1	S.MPLPPHPGHPG.Y			379.529	3	1136.57	1136.57	0	5.8	17	Non	470.03	349.18	349.18	4.79	1304	>sp|P02817|AMELX_BOVIN Amelogenin, X isoform OS=Bos taurus OX=9913 GN=AMELX PE=1 SV=2	1	hf1_10472_ebo_24_1_261219.ScanId;v=1;d1=8864.8864.3	controllerType=0 controllerNumber=1 scan=8864	24.1294
10497:3	1	S.MPLPPHPGHPG.Y			379.529	3	1136.57	1136.57	0	5.2	17	Non	476.57	434.15	434.15	5.26	1304	>sp|P02817|AMELX_BOVIN Amelogenin, X isoform OS=Bos taurus OX=9913 GN=AMELX PE=1 SV=2	1	hf1_10472_ebo_24_1_261219.ScanId;v=1;d1=9261.9261.3	controllerType=0 controllerNumber=1 scan=9261	24.8188
10200:3	1	S.MPLPPHPGHPG.Y			379.529	3	1136.57	1136.57	0	5.5	17	Non	479.07	356.76	356.76	4.79	1304	>sp|P02817|AMELX_BOVIN Amelogenin, X isoform OS=Bos taurus OX=9913 GN=AMELX PE=1 SV=2	1	hf1_10472_ebo_24_1_261219.ScanId;v=1;d1=9063.9063.3	controllerType=0 controllerNumber=1 scan=9063	24.476
08499:3	1	S.M[+15.995]PLPPHPGHPG.Y		M[+16]	384.861	3	1152.57	1152.56	0	6.8	17	Non	246.4	193.41	8.98	3.03	1304	>sp|P02817|AMELX_BOVIN Amelogenin, X isoform OS=Bos taurus OX=9913 GN=AMELX PE=1 SV=2	1	hf1_10472_ebo_24_1_261219.ScanId;v=1;d1=7917.7917.3	controllerType=0 controllerNumber=1 scan=7917	22.4928
06830:3	1	S.M[+31.990]PLPPHPGHPG.Y		M[+32]	390.193	3	1168.56	1168.56	0	5.6	17	Non	247.69	247.69	0	3.13	1304	>sp|P02817|AMELX_BOVIN Amelogenin, X isoform OS=Bos taurus OX=9913 GN=AMELX PE=1 SV=2	1	hf1_10472_ebo_24_1_261219.ScanId;v=1;d1=6791.6791.3	controllerType=0 controllerNumber=1 scan=6791	20.5494
07648:2	1	S.M[+15.995]PLPPHPGHPG.Y		M[+16]	576.788	2	1152.57	1152.56	0	5.5	17	Non	338.62	235.4	52.08	3.74	1304	>sp|P02817|AMELX_BOVIN Amelogenin, X isoform OS=Bos taurus OX=9913 GN=AMELX PE=1 SV=2	1	hf1_10472_ebo_24_1_261219.ScanId;v=1;d1=7344.7344.2	controllerType=0 controllerNumber=1 scan=7344	21.5065
08137:3	1	S.M[+15.995]PLPPHPGHPG.Y		M[+16]	384.861	3	1152.57	1152.56	0	4.7	17	Non	352.61	352.61	31.58	3.82	1304	>sp|P02817|AMELX_BOVIN Amelogenin, X isoform OS=Bos taurus OX=9913 GN=AMELX PE=1 SV=2	1	hf1_10472_ebo_24_1_261219.ScanId;v=1;d1=7669.7669.3	controllerType=0 controllerNumber=1 scan=7669	22.0658
07840:3	1	S.M[+15.995]PLPPHPGHPG.Y		M[+16]	384.861	3	1152.57	1152.56	0	5	17	Non	388.09	329.36	34.87	4.01	1304	>sp|P02817|AMELX_BOVIN Amelogenin, X isoform OS=Bos taurus OX=9913 GN=AMELX PE=1 SV=2	1	hf1_10472_ebo_24_1_261219.ScanId;v=1;d1=7470.7470.3	controllerType=0 controllerNumber=1 scan=7470	21.7242
04918:3	1	S.M[+15.995]PLPPHPGHPG.Y		M[+16]	384.861	3	1152.57	1152.56	0	5.8	17	Non	397.42	338.31	30.02	4.68	1304	>sp|P02817|AMELX_BOVIN Amelogenin, X isoform OS=Bos taurus OX=9913 GN=AMELX PE=1 SV=2	1	hf1_10472_ebo_24_1_261219.ScanId;v=1;d1=5468.5468.3	controllerType=0 controllerNumber=1 scan=5468	18.2569
07531:3	1	S.M[+15.995]PLPPHPGHPG.Y		M[+16]	384.861	3	1152.57	1152.56	0	5	17	Non	422.11	387.2	36.66	5.07	1304	>sp|P02817|AMELX_BOVIN Amelogenin, X isoform OS=Bos taurus OX=9913 GN=AMELX PE=1 SV=2	1	hf1_10472_ebo_24_1_261219.ScanId;v=1;d1=7267.7267.3	controllerType=0 controllerNumber=1 scan=7267	21.3734
47191:3	1	S.M[+15.995]PLPPHPGHPG.Y		M[+16]	384.861	3	1152.57	1152.56	0	7	17	Non	435.35	373.49	47.71	5.75	1304	>sp|P02817|AMELX_BOVIN Amelogenin, X isoform OS=Bos taurus OX=9913 GN=AMELX PE=1 SV=2	1	hf1_10472_ebo_24_1_261219.ScanId;v=1;d1=34765.34765.3	controllerType=0 controllerNumber=1 scan=34765	73.5746
05171:3	1	S.M[+15.995]PLPPHPGHPG.Y		M[+16]	384.861	3	1152.57	1152.56	0	6	17	Non	438.63	378.53	37.88	5.51	1304	>sp|P02817|AMELX_BOVIN Amelogenin, X isoform OS=Bos taurus OX=9913 GN=AMELX PE=1 SV=2	1	hf1_10472_ebo_24_1_261219.ScanId;v=1;d1=5660.5660.3	controllerType=0 controllerNumber=1 scan=5660	18.5947
06055:3	1	S.M[+15.995]PLPPHPGHPG.Y		M[+16]	384.862	3	1152.57	1152.56	0	7.3	17	Non	455.55	399.45	32.49	5.94	1304	>sp|P02817|AMELX_BOVIN Amelogenin, X isoform OS=Bos taurus OX=9913 GN=AMELX PE=1 SV=2	1	hf1_10472_ebo_24_1_261219.ScanId;v=1;d1=6261.6261.3	controllerType=0 controllerNumber=1 scan=6261	19.6416
06642:3	1	S.M[+15.995]PLPPHPGHPG.Y		M[+16]	384.861	3	1152.57	1152.56	0	5.8	17	Non	464.97	443.97	47.93	5.71	1304	>sp|P02817|AMELX_BOVIN Amelogenin, X isoform OS=Bos taurus OX=9913 GN=AMELX PE=1 SV=2	1	hf1_10472_ebo_24_1_261219.ScanId;v=1;d1=6662.6662.3	controllerType=0 controllerNumber=1 scan=6662	20.3278
07235:3	1	S.M[+15.995]PLPPHPGHPG.Y		M[+16]	384.861	3	1152.57	1152.56	0	5.8	17	Non	468.51	407.06	47.44	5.71	1304	>sp|P02817|AMELX_BOVIN Amelogenin, X isoform OS=Bos taurus OX=9913 GN=AMELX PE=1 SV=2	1	hf1_10472_ebo_24_1_261219.ScanId;v=1;d1=7069.7069.3	controllerType=0 controllerNumber=1 scan=7069	21.0306
06929:3	1	S.M[+15.995]PLPPHPGHPG.Y		M[+16]	384.861	3	1152.57	1152.56	0	6.4	17	Non	468.56	408.24	36.92	5.94	1304	>sp|P02817|AMELX_BOVIN Amelogenin, X isoform OS=Bos taurus OX=9913 GN=AMELX PE=1 SV=2	1	hf1_10472_ebo_24_1_261219.ScanId;v=1;d1=6861.6861.3	controllerType=0 controllerNumber=1 scan=6861	20.6717
05474:3	1	S.M[+15.995]PLPPHPGHPG.Y		M[+16]	384.861	3	1152.57	1152.56	0	7	17	Non	475.99	411.52	36.8	5.94	1304	>sp|P02817|AMELX_BOVIN Amelogenin, X isoform OS=Bos taurus OX=9913 GN=AMELX PE=1 SV=2	1	hf1_10472_ebo_24_1_261219.ScanId;v=1;d1=5862.5862.3	controllerType=0 controllerNumber=1 scan=5862	18.9485
05767:3	1	S.M[+15.995]PLPPHPGHPG.Y		M[+16]	384.861	3	1152.57	1152.56	0	7.1	17	Non	479.59	435.25	36	5.94	1304	>sp|P02817|AMELX_BOVIN Amelogenin, X isoform OS=Bos taurus OX=9913 GN=AMELX PE=1 SV=2	1	hf1_10472_ebo_24_1_261219.ScanId;v=1;d1=6063.6063.3	controllerType=0 controllerNumber=1 scan=6063	19.3009
06351:3	1	S.M[+15.995]PLPPHPGHPG.Y		M[+16]	384.861	3	1152.57	1152.56	0	6.9	17	Non	500.14	429.37	77.89	6.05	1304	>sp|P02817|AMELX_BOVIN Amelogenin, X isoform OS=Bos taurus OX=9913 GN=AMELX PE=1 SV=2	1	hf1_10472_ebo_24_1_261219.ScanId;v=1;d1=6464.6464.3	controllerType=0 controllerNumber=1 scan=6464	19.989
07103:2	1	S.M[+15.995]PLPPHPGHPG.Y		M[+16]	576.788	2	1152.57	1152.56	0	6.3	17	Non	509.76	390.01	64.66	5.71	1304	>sp|P02817|AMELX_BOVIN Amelogenin, X isoform OS=Bos taurus OX=9913 GN=AMELX PE=1 SV=2	1	hf1_10472_ebo_24_1_261219.ScanId;v=1;d1=6981.6981.2	controllerType=0 controllerNumber=1 scan=6981	20.8789
05092:2	1	S.M[+15.995]PLPPHPGHPG.Y		M[+16]	576.787	2	1152.57	1152.56	0	4.6	17	Non	579.6	524.42	74.46	6.75	1304	>sp|P02817|AMELX_BOVIN Amelogenin, X isoform OS=Bos taurus OX=9913 GN=AMELX PE=1 SV=2	1	hf1_10472_ebo_24_1_261219.ScanId;v=1;d1=5597.5597.2	controllerType=0 controllerNumber=1 scan=5597	18.4767
05361:2	1	S.M[+15.995]PLPPHPGHPG.Y		M[+16]	576.788	2	1152.57	1152.56	0	6.4	17	Non	583.05	489.35	101.68	6.99	1304	>sp|P02817|AMELX_BOVIN Amelogenin, X isoform OS=Bos taurus OX=9913 GN=AMELX PE=1 SV=2	1	hf1_10472_ebo_24_1_261219.ScanId;v=1;d1=5785.5785.2	controllerType=0 controllerNumber=1 scan=5785	18.8141
06816:2	1	S.M[+15.995]PLPPHPGHPG.Y		M[+16]	576.788	2	1152.57	1152.56	0	5.9	17	Non	595.31	413.21	63.99	6.31	1304	>sp|P02817|AMELX_BOVIN Amelogenin, X isoform OS=Bos taurus OX=9913 GN=AMELX PE=1 SV=2	1	hf1_10472_ebo_24_1_261219.ScanId;v=1;d1=6784.6784.2	controllerType=0 controllerNumber=1 scan=6784	20.5393
05646:2	1	S.M[+15.995]PLPPHPGHPG.Y		M[+16]	576.788	2	1152.57	1152.56	0	5.5	17	Non	601.27	481.32	84.7	7.75	1304	>sp|P02817|AMELX_BOVIN Amelogenin, X isoform OS=Bos taurus OX=9913 GN=AMELX PE=1 SV=2	1	hf1_10472_ebo_24_1_261219.ScanId;v=1;d1=5982.5982.2	controllerType=0 controllerNumber=1 scan=5982	19.1586
06238:2	1	S.M[+15.995]PLPPHPGHPG.Y		M[+16]	576.788	2	1152.57	1152.56	0	6.3	17	Non	604.67	481.36	91.01	7.99	1304	>sp|P02817|AMELX_BOVIN Amelogenin, X isoform OS=Bos taurus OX=9913 GN=AMELX PE=1 SV=2	1	hf1_10472_ebo_24_1_261219.ScanId;v=1;d1=6387.6387.2	controllerType=0 controllerNumber=1 scan=6387	19.8578
06527:2	1	S.M[+15.995]PLPPHPGHPG.Y		M[+16]	576.788	2	1152.57	1152.56	0	6.3	17	Non	608.87	506.5	93.36	7.54	1304	>sp|P02817|AMELX_BOVIN Amelogenin, X isoform OS=Bos taurus OX=9913 GN=AMELX PE=1 SV=2	1	hf1_10472_ebo_24_1_261219.ScanId;v=1;d1=6585.6585.2	controllerType=0 controllerNumber=1 scan=6585	20.1948
05942:2	1	S.M[+15.995]PLPPHPGHPG.Y		M[+16]	576.788	2	1152.57	1152.56	0	6.2	17	Non	618.83	505.96	91.1	7.75	1304	>sp|P02817|AMELX_BOVIN Amelogenin, X isoform OS=Bos taurus OX=9913 GN=AMELX PE=1 SV=2	1	hf1_10472_ebo_24_1_261219.ScanId;v=1;d1=6184.6184.2	controllerType=0 controllerNumber=1 scan=6184	19.5087
05753:3	1	S.MP[+15.995]LPPHPGHP[+15.995]G.Y		P[+16]*2	390.192	3	1168.56	1168.56	0	5.4	17	Non	205.58	205.58	3.49	2.24	1304	>sp|P02817|AMELX_BOVIN Amelogenin, X isoform OS=Bos taurus OX=9913 GN=AMELX PE=1 SV=2	1	hf1_10472_ebo_24_1_261219.ScanId;v=1;d1=6054.6054.3	controllerType=0 controllerNumber=1 scan=6054	19.2846
03609:3	1	S.M[+15.995]PLPPHPGHP[+15.995]G.Y		M[+16], P[+16]	390.192	3	1168.56	1168.56	0	3.5	17	Non	233.47	233.47	13.78	2.32	1304	>sp|P02817|AMELX_BOVIN Amelogenin, X isoform OS=Bos taurus OX=9913 GN=AMELX PE=1 SV=2	1	hf1_10472_ebo_24_1_261219.ScanId;v=1;d1=4574.4574.3	controllerType=0 controllerNumber=1 scan=4574	16.7144
04554:2	1	S.M[+15.995]PLPPHPGHP[+15.995]G.Y		M[+16], P[+16]	584.785	2	1168.56	1168.56	0	6	17	Non	260.31	135.87	17.27	2.43	1304	>sp|P02817|AMELX_BOVIN Amelogenin, X isoform OS=Bos taurus OX=9913 GN=AMELX PE=1 SV=2	1	hf1_10472_ebo_24_1_261219.ScanId;v=1;d1=5227.5227.2	controllerType=0 controllerNumber=1 scan=5227	17.8393
05468:3	1	S.M[+15.995]PLPPHPGHP[+15.995]G.Y		M[+16], P[+16]	390.193	3	1168.56	1168.56	0	5.5	17	Non	317.06	268.49	8.18	3.7	1304	>sp|P02817|AMELX_BOVIN Amelogenin, X isoform OS=Bos taurus OX=9913 GN=AMELX PE=1 SV=2	1	hf1_10472_ebo_24_1_261219.ScanId;v=1;d1=5858.5858.3	controllerType=0 controllerNumber=1 scan=5858	18.9398
05067:3	1	S.M[+15.995]PLPPHPGHP[+15.995]G.Y		M[+16], P[+16]	390.193	3	1168.56	1168.56	0	6.2	17	Non	333.93	276.92	8.71	3.99	1304	>sp|P02817|AMELX_BOVIN Amelogenin, X isoform OS=Bos taurus OX=9913 GN=AMELX PE=1 SV=2	1	hf1_10472_ebo_24_1_261219.ScanId;v=1;d1=5581.5581.4	controllerType=0 controllerNumber=1 scan=5581	18.4479
04741:3	1	S.M[+15.995]PLPPHPGHP[+15.995]G.Y		M[+16], P[+16]	390.193	3	1168.56	1168.56	0	6.8	17	Non	416.73	380.84	13.51	5.07	1304	>sp|P02817|AMELX_BOVIN Amelogenin, X isoform OS=Bos taurus OX=9913 GN=AMELX PE=1 SV=2	1	hf1_10472_ebo_24_1_261219.ScanId;v=1;d1=5353.5353.3	controllerType=0 controllerNumber=1 scan=5353	18.0572
04436:3	1	S.M[+15.995]PLPPHPGHP[+15.995]G.Y		M[+16], P[+16]	390.193	3	1168.56	1168.56	0	6.2	17	Non	451.38	381.91	21.86	5.49	1304	>sp|P02817|AMELX_BOVIN Amelogenin, X isoform OS=Bos taurus OX=9913 GN=AMELX PE=1 SV=2	1	hf1_10472_ebo_24_1_261219.ScanId;v=1;d1=5148.5148.3	controllerType=0 controllerNumber=1 scan=5148	17.7046
04260:2	1	S.M[+15.995]PLPPHPGHP[+15.995]G.Y		M[+16], P[+16]	584.786	2	1168.56	1168.56	0	6.2	17	Non	453.89	303.69	62.03	4.39	1304	>sp|P02817|AMELX_BOVIN Amelogenin, X isoform OS=Bos taurus OX=9913 GN=AMELX PE=1 SV=2	1	hf1_10472_ebo_24_1_261219.ScanId;v=1;d1=5020.5020.2	controllerType=0 controllerNumber=1 scan=5020	17.4841
12867:3	1	S.MPLPPHPGHPGY.I			433.884	3	1299.64	1299.63	0	5.8	17	Non	359.75	278.83	278.83	3.62	1304	>sp|P02817|AMELX_BOVIN Amelogenin, X isoform OS=Bos taurus OX=9913 GN=AMELX PE=1 SV=2	1	hf1_10472_ebo_24_1_261219.ScanId;v=1;d1=10866.10866.3	controllerType=0 controllerNumber=1 scan=10866	27.6078
08350:3	1	S.M[+15.995]PLPPHPGHPGY.I		M[+16]	439.216	3	1315.63	1315.63	0	5.7	17	Non	439.46	341.48	26.19	4.15	1304	>sp|P02817|AMELX_BOVIN Amelogenin, X isoform OS=Bos taurus OX=9913 GN=AMELX PE=1 SV=2	1	hf1_10472_ebo_24_1_261219.ScanId;v=1;d1=7817.7817.3	controllerType=0 controllerNumber=1 scan=7817	22.3196
10527:2	1	S.M[+15.995]PLPPHPGHPGY.I		M[+16]	658.32	2	1315.63	1315.63	0	5.6	17	Non	442.76	350.22	27.26	4.03	1304	>sp|P02817|AMELX_BOVIN Amelogenin, X isoform OS=Bos taurus OX=9913 GN=AMELX PE=1 SV=2	1	hf1_10472_ebo_24_1_261219.ScanId;v=1;d1=9281.9281.2	controllerType=0 controllerNumber=1 scan=9281	24.8539
10727:3	1	S.M[+15.995]PLPPHPGHPGY.I		M[+16]	439.216	3	1315.63	1315.63	0	5.1	17	Non	449.61	379.47	34.98	5.03	1304	>sp|P02817|AMELX_BOVIN Amelogenin, X isoform OS=Bos taurus OX=9913 GN=AMELX PE=1 SV=2	1	hf1_10472_ebo_24_1_261219.ScanId;v=1;d1=9413.9413.3	controllerType=0 controllerNumber=1 scan=9413	25.0841
08447:2	1	S.M[+15.995]PLPPHPGHPGY.I		M[+16]	658.32	2	1315.63	1315.63	0	5.3	17	Non	462.1	431.62	38.65	5.37	1304	>sp|P02817|AMELX_BOVIN Amelogenin, X isoform OS=Bos taurus OX=9913 GN=AMELX PE=1 SV=2	1	hf1_10472_ebo_24_1_261219.ScanId;v=1;d1=7881.7881.2	controllerType=0 controllerNumber=1 scan=7881	22.4306
47188:3	1	S.M[+15.995]PLPPHPGHPGY.I		M[+16]	439.216	3	1315.63	1315.63	0	7.2	17	Non	498.16	389.25	29.69	6.05	1304	>sp|P02817|AMELX_BOVIN Amelogenin, X isoform OS=Bos taurus OX=9913 GN=AMELX PE=1 SV=2	1	hf1_10472_ebo_24_1_261219.ScanId;v=1;d1=34762.34762.3	controllerType=0 controllerNumber=1 scan=34762	73.5701
10422:3	1	S.M[+15.995]PLPPHPGHPGY.I		M[+16]	439.216	3	1315.63	1315.63	0	5.3	17	Non	500.34	427.54	30.08	5.81	1304	>sp|P02817|AMELX_BOVIN Amelogenin, X isoform OS=Bos taurus OX=9913 GN=AMELX PE=1 SV=2	1	hf1_10472_ebo_24_1_261219.ScanId;v=1;d1=9209.9209.3	controllerType=0 controllerNumber=1 scan=9209	24.7276
08935:3	1	S.M[+15.995]PLPPHPGHPGY.I		M[+16]	439.216	3	1315.63	1315.63	0	6.5	17	Non	519.74	452.12	31.48	6.05	1304	>sp|P02817|AMELX_BOVIN Amelogenin, X isoform OS=Bos taurus OX=9913 GN=AMELX PE=1 SV=2	1	hf1_10472_ebo_24_1_261219.ScanId;v=1;d1=8217.8217.3	controllerType=0 controllerNumber=1 scan=8217	23.0074
10217:2	1	S.M[+15.995]PLPPHPGHPGY.I		M[+16]	658.32	2	1315.63	1315.63	0	5.4	17	Non	526.58	422.42	62.32	5.08	1304	>sp|P02817|AMELX_BOVIN Amelogenin, X isoform OS=Bos taurus OX=9913 GN=AMELX PE=1 SV=2	1	hf1_10472_ebo_24_1_261219.ScanId;v=1;d1=9075.9075.2	controllerType=0 controllerNumber=1 scan=9075	24.4968
08642:3	1	S.M[+15.995]PLPPHPGHPGY.I		M[+16]	439.216	3	1315.63	1315.63	0	5.5	17	Non	528.43	460.89	31.97	5.83	1304	>sp|P02817|AMELX_BOVIN Amelogenin, X isoform OS=Bos taurus OX=9913 GN=AMELX PE=1 SV=2	1	hf1_10472_ebo_24_1_261219.ScanId;v=1;d1=8019.8019.3	controllerType=0 controllerNumber=1 scan=8019	22.6677
09227:3	1	S.M[+15.995]PLPPHPGHPGY.I		M[+16]	439.216	3	1315.63	1315.63	0	7	17	Non	534.83	471.14	31.76	6.07	1304	>sp|P02817|AMELX_BOVIN Amelogenin, X isoform OS=Bos taurus OX=9913 GN=AMELX PE=1 SV=2	1	hf1_10472_ebo_24_1_261219.ScanId;v=1;d1=8415.8415.3	controllerType=0 controllerNumber=1 scan=8415	23.3518
09824:3	1	S.M[+15.995]PLPPHPGHPGY.I		M[+16]	439.216	3	1315.63	1315.63	0	6.1	17	Non	540.12	474.83	33.3	5.83	1304	>sp|P02817|AMELX_BOVIN Amelogenin, X isoform OS=Bos taurus OX=9913 GN=AMELX PE=1 SV=2	1	hf1_10472_ebo_24_1_261219.ScanId;v=1;d1=8815.8815.3	controllerType=0 controllerNumber=1 scan=8815	24.0441
10115:3	1	S.M[+15.995]PLPPHPGHPGY.I		M[+16]	439.216	3	1315.63	1315.63	0	6	17	Non	545.3	458.61	39.61	5.83	1304	>sp|P02817|AMELX_BOVIN Amelogenin, X isoform OS=Bos taurus OX=9913 GN=AMELX PE=1 SV=2	1	hf1_10472_ebo_24_1_261219.ScanId;v=1;d1=9008.9008.3	controllerType=0 controllerNumber=1 scan=9008	24.3809
09513:3	1	S.M[+15.995]PLPPHPGHPGY.I		M[+16]	439.216	3	1315.63	1315.63	0	6.5	17	Non	568.27	485.78	41.11	6.88	1304	>sp|P02817|AMELX_BOVIN Amelogenin, X isoform OS=Bos taurus OX=9913 GN=AMELX PE=1 SV=2	1	hf1_10472_ebo_24_1_261219.ScanId;v=1;d1=8613.8613.3	controllerType=0 controllerNumber=1 scan=8613	23.6921
09916:2	1	S.M[+15.995]PLPPHPGHPGY.I		M[+16]	658.32	2	1315.63	1315.63	0	5.2	17	Non	580.04	425.12	55.81	6.75	1304	>sp|P02817|AMELX_BOVIN Amelogenin, X isoform OS=Bos taurus OX=9913 GN=AMELX PE=1 SV=2	1	hf1_10472_ebo_24_1_261219.ScanId;v=1;d1=8879.8879.2	controllerType=0 controllerNumber=1 scan=8879	24.1546
08742:2	1	S.M[+15.995]PLPPHPGHPGY.I		M[+16]	658.32	2	1315.63	1315.63	0	5.4	17	Non	609.36	456.29	70.25	7.31	1304	>sp|P02817|AMELX_BOVIN Amelogenin, X isoform OS=Bos taurus OX=9913 GN=AMELX PE=1 SV=2	1	hf1_10472_ebo_24_1_261219.ScanId;v=1;d1=8085.8085.2	controllerType=0 controllerNumber=1 scan=8085	22.7819
09322:2	1	S.M[+15.995]PLPPHPGHPGY.I		M[+16]	658.32	2	1315.63	1315.63	0	6	17	Non	620.22	464.59	62.25	7.75	1304	>sp|P02817|AMELX_BOVIN Amelogenin, X isoform OS=Bos taurus OX=9913 GN=AMELX PE=1 SV=2	1	hf1_10472_ebo_24_1_261219.ScanId;v=1;d1=8481.8481.2	controllerType=0 controllerNumber=1 scan=8481	23.4654
09036:2	1	S.M[+15.995]PLPPHPGHPGY.I		M[+16]	658.321	2	1315.63	1315.63	0	6.6	17	Non	622.3	497.65	83.07	7.54	1304	>sp|P02817|AMELX_BOVIN Amelogenin, X isoform OS=Bos taurus OX=9913 GN=AMELX PE=1 SV=2	1	hf1_10472_ebo_24_1_261219.ScanId;v=1;d1=8283.8283.2	controllerType=0 controllerNumber=1 scan=8283	23.1223
09618:2	1	S.M[+15.995]PLPPHPGHPGY.I		M[+16]	658.32	2	1315.63	1315.63	0	5.7	17	Non	633.33	461.92	77.85	7.31	1304	>sp|P02817|AMELX_BOVIN Amelogenin, X isoform OS=Bos taurus OX=9913 GN=AMELX PE=1 SV=2	1	hf1_10472_ebo_24_1_261219.ScanId;v=1;d1=8680.8680.2	controllerType=0 controllerNumber=1 scan=8680	23.8072
07841:3	1	S.M[+15.995]PLPPHPGHP[+15.995]GY.I		M[+16], P[+16]	444.547	3	1331.63	1331.62	0	5	17	Non	214.91	200.43	12.07	2.24	1304	>sp|P02817|AMELX_BOVIN Amelogenin, X isoform OS=Bos taurus OX=9913 GN=AMELX PE=1 SV=2	1	hf1_10472_ebo_24_1_261219.ScanId;v=1;d1=7471.7471.3	controllerType=0 controllerNumber=1 scan=7471	21.7254
13592:2	1	S.M[+15.995]PLPPHPGHPGYI.N		M[+16]	714.862	2	1428.72	1428.71	0	5	17	Non	176.8	126.9	15	2.13	1304	>sp|P02817|AMELX_BOVIN Amelogenin, X isoform OS=Bos taurus OX=9913 GN=AMELX PE=1 SV=2	1	hf1_10472_ebo_24_1_261219.ScanId;v=1;d1=11341.11341.2	controllerType=0 controllerNumber=1 scan=11341	28.4354
13787:3	1	S.M[+15.995]PLPPHPGHPGYI.N		M[+16]	476.911	3	1428.72	1428.71	0	6.4	17	Non	324.72	282.74	13.32	3.98	1304	>sp|P02817|AMELX_BOVIN Amelogenin, X isoform OS=Bos taurus OX=9913 GN=AMELX PE=1 SV=2	1	hf1_10472_ebo_24_1_261219.ScanId;v=1;d1=11469.11469.3	controllerType=0 controllerNumber=1 scan=11469	28.6567
13477:3	1	S.M[+15.995]PLPPHPGHPGYI.N		M[+16]	476.911	3	1428.72	1428.71	0	7.4	17	Non	412.58	361.59	26.13	5.07	1304	>sp|P02817|AMELX_BOVIN Amelogenin, X isoform OS=Bos taurus OX=9913 GN=AMELX PE=1 SV=2	1	hf1_10472_ebo_24_1_261219.ScanId;v=1;d1=11265.11265.3	controllerType=0 controllerNumber=1 scan=11265	28.3032
15706:3	1	S.MPLPPHPGHPGYIN.F			509.593	3	1526.77	1526.76	0	5.5	17	Non	278.95	166.51	166.51	2.83	1304	>sp|P02817|AMELX_BOVIN Amelogenin, X isoform OS=Bos taurus OX=9913 GN=AMELX PE=1 SV=2	1	hf1_10472_ebo_24_1_261219.ScanId;v=1;d1=12748.12748.3	controllerType=0 controllerNumber=1 scan=12748	30.8602
14867:2	1	S.MPLPPHPGHPGYIN.F			763.886	2	1526.77	1526.76	0	5.4	17	Non	434.48	337.35	337.35	3.84	1304	>sp|P02817|AMELX_BOVIN Amelogenin, X isoform OS=Bos taurus OX=9913 GN=AMELX PE=1 SV=2	1	hf1_10472_ebo_24_1_261219.ScanId;v=1;d1=12171.12171.2	controllerType=0 controllerNumber=1 scan=12171	29.8756
15272:3	1	S.MPLPPHPGHPGYIN.F			509.593	3	1526.76	1526.76	0	4.2	17	Non	495.09	349.02	349.02	4.22	1304	>sp|P02817|AMELX_BOVIN Amelogenin, X isoform OS=Bos taurus OX=9913 GN=AMELX PE=1 SV=2	1	hf1_10472_ebo_24_1_261219.ScanId;v=1;d1=12441.12441.3	controllerType=0 controllerNumber=1 scan=12441	30.3346
14965:3	1	S.MPLPPHPGHPGYIN.F			509.594	3	1526.77	1526.76	0	5.7	17	Non	519.57	380.95	380.95	5.81	1304	>sp|P02817|AMELX_BOVIN Amelogenin, X isoform OS=Bos taurus OX=9913 GN=AMELX PE=1 SV=2	1	hf1_10472_ebo_24_1_261219.ScanId;v=1;d1=12236.12236.3	controllerType=0 controllerNumber=1 scan=12236	29.9867
13013:2	1	S.M[+15.995]PLPPHPGHPGYIN.F		M[+16]	771.885	2	1542.76	1542.75	0	6.4	17	Non	167.45	165.81	0.91	2.27	1304	>sp|P02817|AMELX_BOVIN Amelogenin, X isoform OS=Bos taurus OX=9913 GN=AMELX PE=1 SV=2	1	hf1_10472_ebo_24_1_261219.ScanId;v=1;d1=10962.10962.3	controllerType=0 controllerNumber=1 scan=10962	27.7727
13566:3	1	S.M[+15.995]PLPPHPGHPGYIN.F		M[+16]	514.926	3	1542.76	1542.75	0	6.3	17	Non	298.46	298.46	5.3	3.92	1304	>sp|P02817|AMELX_BOVIN Amelogenin, X isoform OS=Bos taurus OX=9913 GN=AMELX PE=1 SV=2	1	hf1_10472_ebo_24_1_261219.ScanId;v=1;d1=11326.11326.3	controllerType=0 controllerNumber=1 scan=11326	28.41
12503:2	1	S.M[+15.995]PLPPHPGHPGYIN.F		M[+16]	771.885	2	1542.76	1542.75	0	6.3	17	Non	298.72	259.71	28.12	3.9	1304	>sp|P02817|AMELX_BOVIN Amelogenin, X isoform OS=Bos taurus OX=9913 GN=AMELX PE=1 SV=2	1	hf1_10472_ebo_24_1_261219.ScanId;v=1;d1=10603.10603.2	controllerType=0 controllerNumber=1 scan=10603	27.1496
13259:3	1	S.M[+15.995]PLPPHPGHPGYIN.F		M[+16]	514.926	3	1542.76	1542.75	0	7.6	17	Non	337.6	337.6	4.46	4.05	1304	>sp|P02817|AMELX_BOVIN Amelogenin, X isoform OS=Bos taurus OX=9913 GN=AMELX PE=1 SV=2	1	hf1_10472_ebo_24_1_261219.ScanId;v=1;d1=11126.11126.3	controllerType=0 controllerNumber=1 scan=11126	28.061
12837:2	1	S.M[+15.995]PLPPHPGHPGYIN.F		M[+16]	771.883	2	1542.76	1542.75	0	4.1	17	Non	344.35	307.79	20.95	3.62	1304	>sp|P02817|AMELX_BOVIN Amelogenin, X isoform OS=Bos taurus OX=9913 GN=AMELX PE=1 SV=2	1	hf1_10472_ebo_24_1_261219.ScanId;v=1;d1=10847.10847.2	controllerType=0 controllerNumber=1 scan=10847	27.5759
12676:3	1	S.MP[+15.995]LPPHPGHPGYIN.F		P[+16]	514.925	3	1542.76	1542.75	0	5.2	17	Non	357.91	357.91	4	3.82	1304	>sp|P02817|AMELX_BOVIN Amelogenin, X isoform OS=Bos taurus OX=9913 GN=AMELX PE=1 SV=2	1	hf1_10472_ebo_24_1_261219.ScanId;v=1;d1=10732.10732.3	controllerType=0 controllerNumber=1 scan=10732	27.3763
12766:2	1	S.M[+15.995]PLPPHPGHPGYIN.F		M[+16]	771.881	2	1542.76	1542.75	0	2.2	17	Non	379.15	350.7	22.39	3.36	1304	>sp|P02817|AMELX_BOVIN Amelogenin, X isoform OS=Bos taurus OX=9913 GN=AMELX PE=1 SV=2	1	hf1_10472_ebo_24_1_261219.ScanId;v=1;d1=10798.10798.3	controllerType=0 controllerNumber=1 scan=10798	27.4933
12966:3	1	S.M[+15.995]PLPPHPGHPGYIN.F		M[+16]	514.925	3	1542.76	1542.75	0	6	17	Non	415.67	415.67	18.69	4.64	1304	>sp|P02817|AMELX_BOVIN Amelogenin, X isoform OS=Bos taurus OX=9913 GN=AMELX PE=1 SV=2	1	hf1_10472_ebo_24_1_261219.ScanId;v=1;d1=10932.10932.3	controllerType=0 controllerNumber=1 scan=10932	27.7205
12100:3	1	S.M[+15.995]PLPPHPGHPGYIN.F		M[+16]	514.925	3	1542.76	1542.75	0	6	17	Non	416.86	416.86	15.64	5.07	1304	>sp|P02817|AMELX_BOVIN Amelogenin, X isoform OS=Bos taurus OX=9913 GN=AMELX PE=1 SV=2	1	hf1_10472_ebo_24_1_261219.ScanId;v=1;d1=10333.10333.3	controllerType=0 controllerNumber=1 scan=10333	26.6789
12391:3	1	S.M[+15.995]PLPPHPGHPGYIN.F		M[+16]	514.925	3	1542.76	1542.75	0	5.4	17	Non	425.67	425.67	5.06	5.07	1304	>sp|P02817|AMELX_BOVIN Amelogenin, X isoform OS=Bos taurus OX=9913 GN=AMELX PE=1 SV=2	1	hf1_10472_ebo_24_1_261219.ScanId;v=1;d1=10527.10527.3	controllerType=0 controllerNumber=1 scan=10527	27.0185
11790:3	1	S.M[+15.995]PLPPHPGHPGYIN.F		M[+16]	514.925	3	1542.76	1542.75	0	5.8	17	Non	444.43	444.43	4.43	5.71	1304	>sp|P02817|AMELX_BOVIN Amelogenin, X isoform OS=Bos taurus OX=9913 GN=AMELX PE=1 SV=2	1	hf1_10472_ebo_24_1_261219.ScanId;v=1;d1=10132.10132.3	controllerType=0 controllerNumber=1 scan=10132	26.3296
10592:3	1	S.M[+15.995]PLPPHPGHPGYIN.F		M[+16]	514.925	3	1542.76	1542.75	0	4.7	17	Non	461.33	461.33	22.89	5.71	1304	>sp|P02817|AMELX_BOVIN Amelogenin, X isoform OS=Bos taurus OX=9913 GN=AMELX PE=1 SV=2	1	hf1_10472_ebo_24_1_261219.ScanId;v=1;d1=9327.9327.3	controllerType=0 controllerNumber=1 scan=9327	24.9352
11199:3	1	S.M[+15.995]PLPPHPGHPGYIN.F		M[+16]	514.925	3	1542.76	1542.75	0	5.7	17	Non	486.48	486.48	7.1	5.81	1304	>sp|P02817|AMELX_BOVIN Amelogenin, X isoform OS=Bos taurus OX=9913 GN=AMELX PE=1 SV=2	1	hf1_10472_ebo_24_1_261219.ScanId;v=1;d1=9734.9734.3	controllerType=0 controllerNumber=1 scan=9734	25.6379
11497:3	1	S.MP[+15.995]LPPHPGHPGYIN.F		P[+16]	514.926	3	1542.76	1542.75	0	6.3	17	Non	512.97	512.97	4	6.05	1304	>sp|P02817|AMELX_BOVIN Amelogenin, X isoform OS=Bos taurus OX=9913 GN=AMELX PE=1 SV=2	1	hf1_10472_ebo_24_1_261219.ScanId;v=1;d1=9930.9930.3	controllerType=0 controllerNumber=1 scan=9930	25.9758
10902:3	1	S.M[+15.995]PLPPHPGHPGYIN.F		M[+16]	514.924	3	1542.76	1542.75	0	4.3	17	Non	514.96	514.96	12.86	5.81	1304	>sp|P02817|AMELX_BOVIN Amelogenin, X isoform OS=Bos taurus OX=9913 GN=AMELX PE=1 SV=2	1	hf1_10472_ebo_24_1_261219.ScanId;v=1;d1=9534.9534.3	controllerType=0 controllerNumber=1 scan=9534	25.2917
12193:2	1	S.M[+15.995]PLPPHPGHPGYIN.F		M[+16]	771.885	2	1542.76	1542.75	0	6.2	17	Non	532.45	504.54	47.45	5.08	1304	>sp|P02817|AMELX_BOVIN Amelogenin, X isoform OS=Bos taurus OX=9913 GN=AMELX PE=1 SV=2	1	hf1_10472_ebo_24_1_261219.ScanId;v=1;d1=10400.10400.2	controllerType=0 controllerNumber=1 scan=10400	26.7951
11895:2	1	S.M[+15.995]PLPPHPGHPGYIN.F		M[+16]	771.885	2	1542.76	1542.75	0	6.4	17	Non	588.06	567.55	56.11	6.54	1304	>sp|P02817|AMELX_BOVIN Amelogenin, X isoform OS=Bos taurus OX=9913 GN=AMELX PE=1 SV=2	1	hf1_10472_ebo_24_1_261219.ScanId;v=1;d1=10199.10199.2	controllerType=0 controllerNumber=1 scan=10199	26.4445
11005:2	1	S.M[+15.995]PLPPHPGHPGYIN.F		M[+16]	771.884	2	1542.76	1542.75	0	5.1	17	Non	591.87	559.75	47.83	6.31	1304	>sp|P02817|AMELX_BOVIN Amelogenin, X isoform OS=Bos taurus OX=9913 GN=AMELX PE=1 SV=2	1	hf1_10472_ebo_24_1_261219.ScanId;v=1;d1=9600.9600.2	controllerType=0 controllerNumber=1 scan=9600	25.4055
10697:2	1	S.M[+15.995]PLPPHPGHPGYIN.F		M[+16]	771.884	2	1542.76	1542.75	0	5.3	17	Non	595.36	537.1	48.12	6.07	1304	>sp|P02817|AMELX_BOVIN Amelogenin, X isoform OS=Bos taurus OX=9913 GN=AMELX PE=1 SV=2	1	hf1_10472_ebo_24_1_261219.ScanId;v=1;d1=9393.9393.2	controllerType=0 controllerNumber=1 scan=9393	25.0493
11292:2	1	S.M[+15.995]PLPPHPGHPGYIN.F		M[+16]	771.884	2	1542.76	1542.75	0	5.1	17	Non	604.66	594.29	53.71	7.07	1304	>sp|P02817|AMELX_BOVIN Amelogenin, X isoform OS=Bos taurus OX=9913 GN=AMELX PE=1 SV=2	1	hf1_10472_ebo_24_1_261219.ScanId;v=1;d1=9799.9799.2	controllerType=0 controllerNumber=1 scan=9799	25.7513
11602:2	1	S.M[+15.995]PLPPHPGHPGYIN.F		M[+16]	771.884	2	1542.76	1542.75	0	5.9	17	Non	625.21	623.15	71.51	7.31	1304	>sp|P02817|AMELX_BOVIN Amelogenin, X isoform OS=Bos taurus OX=9913 GN=AMELX PE=1 SV=2	1	hf1_10472_ebo_24_1_261219.ScanId;v=1;d1=10001.10001.2	controllerType=0 controllerNumber=1 scan=10001	26.1014
09833:2	1	S.M[+15.995]PLPPHPGHP[+15.995]GYIN.F		M[+16], P[+16]	779.883	2	1558.76	1558.75	0	7.1	17	Non	258.48	200.97	0	3.57	1304	>sp|P02817|AMELX_BOVIN Amelogenin, X isoform OS=Bos taurus OX=9913 GN=AMELX PE=1 SV=2	1	hf1_10472_ebo_24_1_261219.ScanId;v=1;d1=8822.8822.2	controllerType=0 controllerNumber=1 scan=8822	24.0546
10165:2	1	S.M[+15.995]PLPPHPGHPGY[+15.995]IN.F		M[+16], Y[+16]	779.881	2	1558.75	1558.75	0	4.9	17	Non	266.02	192.11	0	2.93	1304	>sp|P02817|AMELX_BOVIN Amelogenin, X isoform OS=Bos taurus OX=9913 GN=AMELX PE=1 SV=2	1	hf1_10472_ebo_24_1_261219.ScanId;v=1;d1=9039.9039.2	controllerType=0 controllerNumber=1 scan=9039	24.4318
10487:3	1	S.M[+15.995]PLPPHPGHP[+15.995]GYIN.F		M[+16], P[+16]	520.257	3	1558.76	1558.75	0	5.3	17	Non	334.41	334.41	9.02	3.97	1304	>sp|P02817|AMELX_BOVIN Amelogenin, X isoform OS=Bos taurus OX=9913 GN=AMELX PE=1 SV=2	1	hf1_10472_ebo_24_1_261219.ScanId;v=1;d1=9255.9255.3	controllerType=0 controllerNumber=1 scan=9255	24.8071
13567:3	1	S.M[+15.995]PLPPHPGHPGYIN[+0.984].F		M[+16], N[+1]	515.252	3	1543.74	1543.74	0	4.2	17	Non	373.4	373.4	0.18	4.88	1304	>sp|P02817|AMELX_BOVIN Amelogenin, X isoform OS=Bos taurus OX=9913 GN=AMELX PE=1 SV=2	1	hf1_10472_ebo_24_1_261219.ScanId;v=1;d1=11326.11326.3	controllerType=0 controllerNumber=1 scan=11326	28.41
09946:3	1	S.M[+15.995]PLPPHPGHP[+15.995]GYIN.F		M[+16], P[+16]	520.257	3	1558.76	1558.75	0	6	17	Non	395	395	5.58	4.92	1304	>sp|P02817|AMELX_BOVIN Amelogenin, X isoform OS=Bos taurus OX=9913 GN=AMELX PE=1 SV=2	1	hf1_10472_ebo_24_1_261219.ScanId;v=1;d1=8897.8897.3	controllerType=0 controllerNumber=1 scan=8897	24.187
09649:3	1	S.M[+15.995]PLPPHPGHP[+15.995]GYIN.F		M[+16], P[+16]	520.257	3	1558.76	1558.75	0	5.6	17	Non	410.67	410.67	10.42	4.84	1304	>sp|P02817|AMELX_BOVIN Amelogenin, X isoform OS=Bos taurus OX=9913 GN=AMELX PE=1 SV=2	1	hf1_10472_ebo_24_1_261219.ScanId;v=1;d1=8702.8702.3	controllerType=0 controllerNumber=1 scan=8702	23.8453
22880:2	1	S.MPLPPHPGHPGYINF.S			837.424	2	1673.84	1673.83	0	9	17	Non	274.86	236.76	236.76	2.82	1304	>sp|P02817|AMELX_BOVIN Amelogenin, X isoform OS=Bos taurus OX=9913 GN=AMELX PE=1 SV=2	1	hf1_10472_ebo_24_1_261219.ScanId;v=1;d1=17658.17658.3	controllerType=0 controllerNumber=1 scan=17658	39.3307
21588:3	1	S.MPLPPHPGHPGYINF.S			558.618	3	1673.84	1673.83	0	7.6	17	Non	311.09	284.18	284.18	4.07	1304	>sp|P02817|AMELX_BOVIN Amelogenin, X isoform OS=Bos taurus OX=9913 GN=AMELX PE=1 SV=2	1	hf1_10472_ebo_24_1_261219.ScanId;v=1;d1=16795.16795.3	controllerType=0 controllerNumber=1 scan=16795	37.8367
21952:3	1	S.MPLPPHPGHPGYINF.S			558.616	3	1673.83	1673.83	0	4.5	17	Non	345.4	295.6	295.6	3.9	1304	>sp|P02817|AMELX_BOVIN Amelogenin, X isoform OS=Bos taurus OX=9913 GN=AMELX PE=1 SV=2	1	hf1_10472_ebo_24_1_261219.ScanId;v=1;d1=17033.17033.3	controllerType=0 controllerNumber=1 scan=17033	38.247
21640:3	1	S.MPLPPHPGHPGYINF.S			558.618	3	1673.84	1673.83	0	8	17	Non	363.39	317.96	317.96	4.13	1304	>sp|P02817|AMELX_BOVIN Amelogenin, X isoform OS=Bos taurus OX=9913 GN=AMELX PE=1 SV=2	1	hf1_10472_ebo_24_1_261219.ScanId;v=1;d1=16828.16828.3	controllerType=0 controllerNumber=1 scan=16828	37.8923
22114:3	1	S.MPLPPHPGHPGYINF.S			558.616	3	1673.84	1673.83	0	5.6	17	Non	382.07	382.07	382.07	4.88	1304	>sp|P02817|AMELX_BOVIN Amelogenin, X isoform OS=Bos taurus OX=9913 GN=AMELX PE=1 SV=2	1	hf1_10472_ebo_24_1_261219.ScanId;v=1;d1=17145.17145.3	controllerType=0 controllerNumber=1 scan=17145	38.4417
23303:3	1	S.MPLPPHPGHPGYINF.S			558.618	3	1673.84	1673.83	0	7.4	17	Non	390.1	335.89	335.89	4.2	1304	>sp|P02817|AMELX_BOVIN Amelogenin, X isoform OS=Bos taurus OX=9913 GN=AMELX PE=1 SV=2	1	hf1_10472_ebo_24_1_261219.ScanId;v=1;d1=17939.17939.3	controllerType=0 controllerNumber=1 scan=17939	39.8184
21538:2	1	S.MPLPPHPGHPGYINF.S			837.421	2	1673.84	1673.83	0	5.7	17	Non	438.72	384.2	384.2	4.91	1304	>sp|P02817|AMELX_BOVIN Amelogenin, X isoform OS=Bos taurus OX=9913 GN=AMELX PE=1 SV=2	1	hf1_10472_ebo_24_1_261219.ScanId;v=1;d1=16759.16759.2	controllerType=0 controllerNumber=1 scan=16759	37.7767
23003:3	1	S.MPLPPHPGHPGYINF.S			558.618	3	1673.84	1673.83	0	7.6	17	Non	439.99	393.87	393.87	4.88	1304	>sp|P02817|AMELX_BOVIN Amelogenin, X isoform OS=Bos taurus OX=9913 GN=AMELX PE=1 SV=2	1	hf1_10472_ebo_24_1_261219.ScanId;v=1;d1=17740.17740.3	controllerType=0 controllerNumber=1 scan=17740	39.4742
23107:2	1	S.MPLPPHPGHPGYINF.S			837.425	2	1673.84	1673.83	0	9.7	17	Non	442.21	396.29	396.29	4.76	1304	>sp|P02817|AMELX_BOVIN Amelogenin, X isoform OS=Bos taurus OX=9913 GN=AMELX PE=1 SV=2	1	hf1_10472_ebo_24_1_261219.ScanId;v=1;d1=17808.17808.2	controllerType=0 controllerNumber=1 scan=17808	39.5908
22405:3	1	S.MPLPPHPGHPGYINF.S			558.618	3	1673.84	1673.83	0	8.2	17	Non	444.59	436.63	436.63	5.26	1304	>sp|P02817|AMELX_BOVIN Amelogenin, X isoform OS=Bos taurus OX=9913 GN=AMELX PE=1 SV=2	1	hf1_10472_ebo_24_1_261219.ScanId;v=1;d1=17340.17340.3	controllerType=0 controllerNumber=1 scan=17340	38.782
22701:3	1	S.MPLPPHPGHPGYINF.S			558.617	3	1673.84	1673.83	0	6.9	17	Non	462.12	416.14	416.14	5.26	1304	>sp|P02817|AMELX_BOVIN Amelogenin, X isoform OS=Bos taurus OX=9913 GN=AMELX PE=1 SV=2	1	hf1_10472_ebo_24_1_261219.ScanId;v=1;d1=17538.17538.3	controllerType=0 controllerNumber=1 scan=17538	39.1236
22719:2	1	S.MPLPPHPGHPGYINF.S			837.423	2	1673.84	1673.83	0	8.1	17	Non	560.55	477.29	477.29	6.12	1304	>sp|P02817|AMELX_BOVIN Amelogenin, X isoform OS=Bos taurus OX=9913 GN=AMELX PE=1 SV=2	1	hf1_10472_ebo_24_1_261219.ScanId;v=1;d1=17550.17550.2	controllerType=0 controllerNumber=1 scan=17550	39.1441
22421:2	1	S.MPLPPHPGHPGYINF.S			837.423	2	1673.84	1673.83	0	7.9	17	Non	645.48	550.39	550.39	7.31	1304	>sp|P02817|AMELX_BOVIN Amelogenin, X isoform OS=Bos taurus OX=9913 GN=AMELX PE=1 SV=2	1	hf1_10472_ebo_24_1_261219.ScanId;v=1;d1=17351.17351.2	controllerType=0 controllerNumber=1 scan=17351	38.8011
47104:2	1	S.M[+15.995]PLPPHPGHPGYINF.S		M[+16]	845.42	2	1689.83	1689.82	0	7.3	17	Non	110.05	110.05	49.16	2.04	1304	>sp|P02817|AMELX_BOVIN Amelogenin, X isoform OS=Bos taurus OX=9913 GN=AMELX PE=1 SV=2	1	hf1_10472_ebo_24_1_261219.ScanId;v=1;d1=34699.34699.3	controllerType=0 controllerNumber=1 scan=34699	73.4561
46612:3	1	S.MP[+15.995]LPPHPGHPGYINF.S		P[+16]	563.948	3	1689.83	1689.82	0	4.7	17	Non	135.62	135.62	4	1.61	1304	>sp|P02817|AMELX_BOVIN Amelogenin, X isoform OS=Bos taurus OX=9913 GN=AMELX PE=1 SV=2	1	hf1_10472_ebo_24_1_261219.ScanId;v=1;d1=34214.34214.3	controllerType=0 controllerNumber=1 scan=34214	72.0295
18419:2	1	S.MP[+15.995]LPPHPGHPGYINF.S		P[+16]	845.422	2	1689.84	1689.82	0	9.2	17	Non	219.36	219.36	3.05	2.43	1304	>sp|P02817|AMELX_BOVIN Amelogenin, X isoform OS=Bos taurus OX=9913 GN=AMELX PE=1 SV=2	1	hf1_10472_ebo_24_1_261219.ScanId;v=1;d1=14611.14611.3	controllerType=0 controllerNumber=1 scan=14611	34.0753
47061:3	1	S.MP[+15.995]LPPHPGHPGYINF.S		P[+16]	563.948	3	1689.83	1689.82	0	6.1	17	Non	230.37	230.37	4	2.55	1304	>sp|P02817|AMELX_BOVIN Amelogenin, X isoform OS=Bos taurus OX=9913 GN=AMELX PE=1 SV=2	1	hf1_10472_ebo_24_1_261219.ScanId;v=1;d1=34664.34664.3	controllerType=0 controllerNumber=1 scan=34664	73.3815
46515:3	1	S.MP[+15.995]LPPHPGHPGYINF.S		P[+16]	563.947	3	1689.83	1689.82	0	3.9	17	Non	235.39	235.39	4	2.42	1304	>sp|P02817|AMELX_BOVIN Amelogenin, X isoform OS=Bos taurus OX=9913 GN=AMELX PE=1 SV=2	1	hf1_10472_ebo_24_1_261219.ScanId;v=1;d1=34111.34111.3	controllerType=0 controllerNumber=1 scan=34111	71.6903
45472:3	1	S.MP[+15.995]LPPHPGHPGYINF.S		P[+16]	563.947	3	1689.83	1689.82	0	4.4	17	Non	247.47	247.47	4	3.37	1304	>sp|P02817|AMELX_BOVIN Amelogenin, X isoform OS=Bos taurus OX=9913 GN=AMELX PE=1 SV=2	1	hf1_10472_ebo_24_1_261219.ScanId;v=1;d1=32968.32968.3	controllerType=0 controllerNumber=1 scan=32968	67.7614
00002:3	1	S.MP[+15.995]LPPHPGHPGYINF.S		P[+16]	563.948	3	1689.83	1689.82	0	5.1	17	Non	249.75	249.75	4	3.52	1304	>sp|P02817|AMELX_BOVIN Amelogenin, X isoform OS=Bos taurus OX=9913 GN=AMELX PE=1 SV=2	1	hf1_10472_ebo_24_1_261219.ScanId;v=1;d1=6.6.3	controllerType=0 controllerNumber=1 scan=6	0.0361
16702:3	1	S.MP[+15.995]LPPHPGHPGYINF.S		P[+16]	563.949	3	1689.83	1689.82	0	6.6	17	Non	256.94	256.94	11.41	3.59	1304	>sp|P02817|AMELX_BOVIN Amelogenin, X isoform OS=Bos taurus OX=9913 GN=AMELX PE=1 SV=2	1	hf1_10472_ebo_24_1_261219.ScanId;v=1;d1=13425.13425.3	controllerType=0 controllerNumber=1 scan=13425	32.0379
45575:3	1	S.MP[+15.995]LPPHPGHPGYINF.S		P[+16]	563.948	3	1689.83	1689.82	0	4.8	17	Non	307.8	307.8	4	3.84	1304	>sp|P02817|AMELX_BOVIN Amelogenin, X isoform OS=Bos taurus OX=9913 GN=AMELX PE=1 SV=2	1	hf1_10472_ebo_24_1_261219.ScanId;v=1;d1=33070.33070.3	controllerType=0 controllerNumber=1 scan=33070	68.0996
19452:2	1	S.M[+15.995]PLPPHPGHPGYINF.S		M[+16]	845.418	2	1689.83	1689.82	0	5.4	17	Non	338.56	338.56	17.36	4.12	1304	>sp|P02817|AMELX_BOVIN Amelogenin, X isoform OS=Bos taurus OX=9913 GN=AMELX PE=1 SV=2	1	hf1_10472_ebo_24_1_261219.ScanId;v=1;d1=15359.15359.3	controllerType=0 controllerNumber=1 scan=15359	35.3608
19740:3	1	S.MP[+15.995]LPPHPGHPGYINF.S		P[+16]	563.95	3	1689.83	1689.82	0	8.4	17	Non	339	339	4	3.63	1304	>sp|P02817|AMELX_BOVIN Amelogenin, X isoform OS=Bos taurus OX=9913 GN=AMELX PE=1 SV=2	1	hf1_10472_ebo_24_1_261219.ScanId;v=1;d1=15565.15565.3	controllerType=0 controllerNumber=1 scan=15565	35.7173
19133:2	1	S.M[+15.995]PLPPHPGHPGYINF.S		M[+16]	845.419	2	1689.83	1689.82	0	5.7	17	Non	341.54	341.54	13.81	4.12	1304	>sp|P02817|AMELX_BOVIN Amelogenin, X isoform OS=Bos taurus OX=9913 GN=AMELX PE=1 SV=2	1	hf1_10472_ebo_24_1_261219.ScanId;v=1;d1=15126.15126.3	controllerType=0 controllerNumber=1 scan=15126	34.9608
20336:3	1	S.MP[+15.995]LPPHPGHPGYINF.S		P[+16]	563.95	3	1689.83	1689.82	0	8.2	17	Non	348.48	348.48	4	4.05	1304	>sp|P02817|AMELX_BOVIN Amelogenin, X isoform OS=Bos taurus OX=9913 GN=AMELX PE=1 SV=2	1	hf1_10472_ebo_24_1_261219.ScanId;v=1;d1=15959.15959.3	controllerType=0 controllerNumber=1 scan=15959	36.4027
18903:3	1	S.MP[+15.995]LPPHPGHPGYINF.S		P[+16]	563.95	3	1689.83	1689.82	0	8.4	17	Non	368.86	368.86	4	4.39	1304	>sp|P02817|AMELX_BOVIN Amelogenin, X isoform OS=Bos taurus OX=9913 GN=AMELX PE=1 SV=2	1	hf1_10472_ebo_24_1_261219.ScanId;v=1;d1=14957.14957.3	controllerType=0 controllerNumber=1 scan=14957	34.6732
21262:3	1	S.MP[+15.995]LPPHPGHPGYINF.S		P[+16]	563.948	3	1689.83	1689.82	0	6	17	Non	368.97	368.97	5.8	4.88	1304	>sp|P02817|AMELX_BOVIN Amelogenin, X isoform OS=Bos taurus OX=9913 GN=AMELX PE=1 SV=2	1	hf1_10472_ebo_24_1_261219.ScanId;v=1;d1=16569.16569.3	controllerType=0 controllerNumber=1 scan=16569	37.4487
20012:3	1	S.M[+31.990]PLPPHPGHPGYINF.S		M[+32]	569.28	3	1705.83	1705.82	0	6	17	Non	369.92	369.92	8.51	4.88	1304	>sp|P02817|AMELX_BOVIN Amelogenin, X isoform OS=Bos taurus OX=9913 GN=AMELX PE=1 SV=2	1	hf1_10472_ebo_24_1_261219.ScanId;v=1;d1=15746.15746.3	controllerType=0 controllerNumber=1 scan=15746	36.0303
23602:3	1	S.MPLPPHPGHPGYIN[+0.984]F.S		N[+1]	558.945	3	1674.82	1674.81	0	6.8	17	Non	370.27	370.27	370.27	5.12	1304	>sp|P02817|AMELX_BOVIN Amelogenin, X isoform OS=Bos taurus OX=9913 GN=AMELX PE=1 SV=2	1	hf1_10472_ebo_24_1_261219.ScanId;v=1;d1=18136.18136.3	controllerType=0 controllerNumber=1 scan=18136	40.1621
20629:3	1	S.M[+15.995]PLPPHPGHPGYINF.S		M[+16]	563.949	3	1689.83	1689.82	0	6.7	17	Non	371.02	371.02	3.77	4.97	1304	>sp|P02817|AMELX_BOVIN Amelogenin, X isoform OS=Bos taurus OX=9913 GN=AMELX PE=1 SV=2	1	hf1_10472_ebo_24_1_261219.ScanId;v=1;d1=16157.16157.3	controllerType=0 controllerNumber=1 scan=16157	36.7444
20750:3	1	S.M[+31.990]PLPPHPGHPGYINF.S		M[+32]	569.28	3	1705.83	1705.82	0	6.1	17	Non	372.29	372.29	9.84	4.72	1304	>sp|P02817|AMELX_BOVIN Amelogenin, X isoform OS=Bos taurus OX=9913 GN=AMELX PE=1 SV=2	1	hf1_10472_ebo_24_1_261219.ScanId;v=1;d1=16230.16230.3	controllerType=0 controllerNumber=1 scan=16230	36.868
19459:3	1	S.MP[+15.995]LPPHPGHPGYINF.S		P[+16]	563.949	3	1689.83	1689.82	0	7.9	17	Non	377.26	377.26	4	4.97	1304	>sp|P02817|AMELX_BOVIN Amelogenin, X isoform OS=Bos taurus OX=9913 GN=AMELX PE=1 SV=2	1	hf1_10472_ebo_24_1_261219.ScanId;v=1;d1=15364.15364.3	controllerType=0 controllerNumber=1 scan=15364	35.3711
18636:3	1	S.MP[+15.995]LPPHPGHPGYINF.S		P[+16]	563.951	3	1689.84	1689.82	0	9.8	17	Non	379.28	379.28	4	4.54	1304	>sp|P02817|AMELX_BOVIN Amelogenin, X isoform OS=Bos taurus OX=9913 GN=AMELX PE=1 SV=2	1	hf1_10472_ebo_24_1_261219.ScanId;v=1;d1=14762.14762.3	controllerType=0 controllerNumber=1 scan=14762	34.3351
20320:3	1	S.M[+31.990]PLPPHPGHPGYINF.S		M[+32]	569.281	3	1705.83	1705.82	0	7.2	17	Non	385.01	385.01	8.44	4.97	1304	>sp|P02817|AMELX_BOVIN Amelogenin, X isoform OS=Bos taurus OX=9913 GN=AMELX PE=1 SV=2	1	hf1_10472_ebo_24_1_261219.ScanId;v=1;d1=15949.15949.3	controllerType=0 controllerNumber=1 scan=15949	36.3848
20039:3	1	S.MP[+15.995]LPPHPGHPGYINF.S		P[+16]	563.95	3	1689.84	1689.82	0	9.5	17	Non	394.13	394.13	4	4.39	1304	>sp|P02817|AMELX_BOVIN Amelogenin, X isoform OS=Bos taurus OX=9913 GN=AMELX PE=1 SV=2	1	hf1_10472_ebo_24_1_261219.ScanId;v=1;d1=15764.15764.3	controllerType=0 controllerNumber=1 scan=15764	36.0619
19181:3	1	S.MP[+15.995]LPPHPGHPGYINF.S		P[+16]	563.95	3	1689.83	1689.82	0	8.2	17	Non	400.28	400.28	4	4.88	1304	>sp|P02817|AMELX_BOVIN Amelogenin, X isoform OS=Bos taurus OX=9913 GN=AMELX PE=1 SV=2	1	hf1_10472_ebo_24_1_261219.ScanId;v=1;d1=15164.15164.3	controllerType=0 controllerNumber=1 scan=15164	35.0265
21867:3	1	S.MP[+15.995]LPPHPGHPGYINF.S		P[+16]	563.948	3	1689.83	1689.82	0	6.1	17	Non	409.33	409.33	5.8	4.79	1304	>sp|P02817|AMELX_BOVIN Amelogenin, X isoform OS=Bos taurus OX=9913 GN=AMELX PE=1 SV=2	1	hf1_10472_ebo_24_1_261219.ScanId;v=1;d1=16979.16979.3	controllerType=0 controllerNumber=1 scan=16979	38.1538
21554:3	1	S.MP[+15.995]LPPHPGHPGYINF.S		P[+16]	563.948	3	1689.83	1689.82	0	5.2	17	Non	415.81	415.81	5.8	4.64	1304	>sp|P02817|AMELX_BOVIN Amelogenin, X isoform OS=Bos taurus OX=9913 GN=AMELX PE=1 SV=2	1	hf1_10472_ebo_24_1_261219.ScanId;v=1;d1=16771.16771.3	controllerType=0 controllerNumber=1 scan=16771	37.7958
23304:3	1	S.MPLPPHPGHPGYIN[+0.984]F.S		N[+1]	558.943	3	1674.82	1674.81	0	3.4	17	Non	422.58	422.58	422.58	4.39	1304	>sp|P02817|AMELX_BOVIN Amelogenin, X isoform OS=Bos taurus OX=9913 GN=AMELX PE=1 SV=2	1	hf1_10472_ebo_24_1_261219.ScanId;v=1;d1=17939.17939.3	controllerType=0 controllerNumber=1 scan=17939	39.8184
18301:2	1	S.M[+15.995]PLPPHPGHPGYINF.S		M[+16]	845.422	2	1689.84	1689.82	0	9.2	17	Non	426.35	283.28	36.15	3.59	1304	>sp|P02817|AMELX_BOVIN Amelogenin, X isoform OS=Bos taurus OX=9913 GN=AMELX PE=1 SV=2	1	hf1_10472_ebo_24_1_261219.ScanId;v=1;d1=14531.14531.2	controllerType=0 controllerNumber=1 scan=14531	33.9388
20303:2	1	S.M[+15.995]PLPPHPGHPGYINF.S		M[+16]	845.42	2	1689.83	1689.82	0	6.8	17	Non	455.23	455.23	34.66	5.38	1304	>sp|P02817|AMELX_BOVIN Amelogenin, X isoform OS=Bos taurus OX=9913 GN=AMELX PE=1 SV=2	1	hf1_10472_ebo_24_1_261219.ScanId;v=1;d1=15938.15938.2	controllerType=0 controllerNumber=1 scan=15938	36.3655
47164:2	1	S.M[+15.995]PLPPHPGHPGYINF.S		M[+16]	845.42	2	1689.83	1689.82	0	7.4	17	Non	457.69	360.16	32.41	5.18	1304	>sp|P02817|AMELX_BOVIN Amelogenin, X isoform OS=Bos taurus OX=9913 GN=AMELX PE=1 SV=2	1	hf1_10472_ebo_24_1_261219.ScanId;v=1;d1=34744.34744.2	controllerType=0 controllerNumber=1 scan=34744	73.538
20927:2	1	S.M[+15.995]PLPPHPGHPGYINF.S		M[+16]	845.421	2	1689.83	1689.82	0	8.1	17	Non	478.02	456.85	45.53	5.18	1304	>sp|P02817|AMELX_BOVIN Amelogenin, X isoform OS=Bos taurus OX=9913 GN=AMELX PE=1 SV=2	1	hf1_10472_ebo_24_1_261219.ScanId;v=1;d1=16346.16346.2	controllerType=0 controllerNumber=1 scan=16346	37.0693
16845:2	1	S.M[+15.995]PLPPHPGHPGYINF.S		M[+16]	845.418	2	1689.83	1689.82	0	4.7	17	Non	481.77	367.36	27.71	5.2	1304	>sp|P02817|AMELX_BOVIN Amelogenin, X isoform OS=Bos taurus OX=9913 GN=AMELX PE=1 SV=2	1	hf1_10472_ebo_24_1_261219.ScanId;v=1;d1=13519.13519.2	controllerType=0 controllerNumber=1 scan=13519	32.2002
18593:2	1	S.M[+15.995]PLPPHPGHPGYINF.S		M[+16]	845.42	2	1689.83	1689.82	0	7.5	17	Non	491.78	374.09	49.31	5.29	1304	>sp|P02817|AMELX_BOVIN Amelogenin, X isoform OS=Bos taurus OX=9913 GN=AMELX PE=1 SV=2	1	hf1_10472_ebo_24_1_261219.ScanId;v=1;d1=14729.14729.2	controllerType=0 controllerNumber=1 scan=14729	34.2782
19415:2	1	S.M[+15.995]PLPPHPGHPGYINF.S		M[+16]	845.418	2	1689.83	1689.82	0	5.3	17	Non	602.13	552.64	70.41	7.31	1304	>sp|P02817|AMELX_BOVIN Amelogenin, X isoform OS=Bos taurus OX=9913 GN=AMELX PE=1 SV=2	1	hf1_10472_ebo_24_1_261219.ScanId;v=1;d1=15332.15332.2	controllerType=0 controllerNumber=1 scan=15332	35.3167
19140:2	1	S.M[+15.995]PLPPHPGHPGYINF.S		M[+16]	845.419	2	1689.83	1689.82	0	5.6	17	Non	615.68	530.57	53.08	7.07	1304	>sp|P02817|AMELX_BOVIN Amelogenin, X isoform OS=Bos taurus OX=9913 GN=AMELX PE=1 SV=2	1	hf1_10472_ebo_24_1_261219.ScanId;v=1;d1=15131.15131.2	controllerType=0 controllerNumber=1 scan=15131	34.9703
20612:2	1	S.M[+15.995]PLPPHPGHPGYINF.S		M[+16]	845.418	2	1689.83	1689.82	0	4.8	17	Non	621.07	578.14	75.5	7.31	1304	>sp|P02817|AMELX_BOVIN Amelogenin, X isoform OS=Bos taurus OX=9913 GN=AMELX PE=1 SV=2	1	hf1_10472_ebo_24_1_261219.ScanId;v=1;d1=16146.16146.2	controllerType=0 controllerNumber=1 scan=16146	36.7232
18869:2	1	S.M[+15.995]PLPPHPGHPGYINF.S		M[+16]	845.419	2	1689.83	1689.82	0	5.5	17	Non	626.37	532.83	54.58	7.31	1304	>sp|P02817|AMELX_BOVIN Amelogenin, X isoform OS=Bos taurus OX=9913 GN=AMELX PE=1 SV=2	1	hf1_10472_ebo_24_1_261219.ScanId;v=1;d1=14931.14931.2	controllerType=0 controllerNumber=1 scan=14931	34.6265
20001:2	1	S.M[+15.995]PLPPHPGHPGYINF.S		M[+16]	845.42	2	1689.83	1689.82	0	6.9	17	Non	639.9	544.32	67.23	7.31	1304	>sp|P02817|AMELX_BOVIN Amelogenin, X isoform OS=Bos taurus OX=9913 GN=AMELX PE=1 SV=2	1	hf1_10472_ebo_24_1_261219.ScanId;v=1;d1=15738.15738.2	controllerType=0 controllerNumber=1 scan=15738	36.0164
19708:2	1	S.M[+15.995]PLPPHPGHPGYINF.S		M[+16]	845.419	2	1689.83	1689.82	0	5.8	17	Non	654.12	580.94	53.78	8.07	1304	>sp|P02817|AMELX_BOVIN Amelogenin, X isoform OS=Bos taurus OX=9913 GN=AMELX PE=1 SV=2	1	hf1_10472_ebo_24_1_261219.ScanId;v=1;d1=15538.15538.2	controllerType=0 controllerNumber=1 scan=15538	35.6719
19049:3	1	S.MP[+15.995]LPP[+15.995]HPGHPGYINF.S		P[+16]*2	569.278	3	1705.82	1705.82	0	1.4	17	Non	231.75	231.75	0	1.7	1304	>sp|P02817|AMELX_BOVIN Amelogenin, X isoform OS=Bos taurus OX=9913 GN=AMELX PE=1 SV=2	1	hf1_10472_ebo_24_1_261219.ScanId;v=1;d1=15065.15065.3	controllerType=0 controllerNumber=1 scan=15065	34.8591
17912:3	1	S.MP[+15.995]LPPHPGHP[+15.995]GYINF.S		P[+16]*2	569.279	3	1705.82	1705.82	0	4.5	17	Non	317.67	317.67	4	3.84	1304	>sp|P02817|AMELX_BOVIN Amelogenin, X isoform OS=Bos taurus OX=9913 GN=AMELX PE=1 SV=2	1	hf1_10472_ebo_24_1_261219.ScanId;v=1;d1=14262.14262.3	controllerType=0 controllerNumber=1 scan=14262	33.4792
18778:3	1	S.MP[+15.995]LPPHPGHP[+15.995]GYINF.S		P[+16]*2	569.278	3	1705.82	1705.82	0	2.8	17	Non	337.09	337.09	4	3.57	1304	>sp|P02817|AMELX_BOVIN Amelogenin, X isoform OS=Bos taurus OX=9913 GN=AMELX PE=1 SV=2	1	hf1_10472_ebo_24_1_261219.ScanId;v=1;d1=14861.14861.3	controllerType=0 controllerNumber=1 scan=14861	34.5037
20950:3	1	S.MP[+15.995]LPPHPGHPGYIN[+0.984]F.S		N[+1], P[+16]	564.276	3	1690.81	1690.8	0	5.1	17	Non	364.04	364.04	4	4.88	1304	>sp|P02817|AMELX_BOVIN Amelogenin, X isoform OS=Bos taurus OX=9913 GN=AMELX PE=1 SV=2	1	hf1_10472_ebo_24_1_261219.ScanId;v=1;d1=16362.16362.3	controllerType=0 controllerNumber=1 scan=16362	37.0966
20630:3	1	S.M[+15.995]PLPPHPGHPGYIN[+0.984]F.S		M[+16], N[+1]	564.279	3	1690.82	1690.8	0	9.8	17	Non	364.92	364.92	0.75	4.54	1304	>sp|P02817|AMELX_BOVIN Amelogenin, X isoform OS=Bos taurus OX=9913 GN=AMELX PE=1 SV=2	1	hf1_10472_ebo_24_1_261219.ScanId;v=1;d1=16157.16157.3	controllerType=0 controllerNumber=1 scan=16157	36.7444
18496:3	1	S.MP[+15.995]LPPHPGHP[+15.995]GYINF.S		P[+16]*2	569.279	3	1705.82	1705.82	0	4.3	17	Non	369.27	369.27	4	4.73	1304	>sp|P02817|AMELX_BOVIN Amelogenin, X isoform OS=Bos taurus OX=9913 GN=AMELX PE=1 SV=2	1	hf1_10472_ebo_24_1_261219.ScanId;v=1;d1=14663.14663.3	controllerType=0 controllerNumber=1 scan=14663	34.1665
18206:3	1	S.MP[+15.995]LPPHPGHP[+15.995]GYINF.S		P[+16]*2	569.279	3	1705.82	1705.82	0	4.4	17	Non	371.11	371.11	4	4.88	1304	>sp|P02817|AMELX_BOVIN Amelogenin, X isoform OS=Bos taurus OX=9913 GN=AMELX PE=1 SV=2	1	hf1_10472_ebo_24_1_261219.ScanId;v=1;d1=14465.14465.3	controllerType=0 controllerNumber=1 scan=14465	33.8277
21263:3	1	S.MP[+15.995]LPPHPGHPGYIN[+0.984]F.S		N[+1], P[+16]	564.277	3	1690.82	1690.8	0	7.4	17	Non	411.69	411.69	5.8	5.07	1304	>sp|P02817|AMELX_BOVIN Amelogenin, X isoform OS=Bos taurus OX=9913 GN=AMELX PE=1 SV=2	1	hf1_10472_ebo_24_1_261219.ScanId;v=1;d1=16569.16569.3	controllerType=0 controllerNumber=1 scan=16569	37.4487
20928:2	1	S.M[+15.995]PLPPHPGHPGYIN[+0.984]F.S		M[+16], N[+1]	845.91	2	1690.81	1690.8	0	5.4	17	Non	473.38	439.5	54.2	5.1	1304	>sp|P02817|AMELX_BOVIN Amelogenin, X isoform OS=Bos taurus OX=9913 GN=AMELX PE=1 SV=2	1	hf1_10472_ebo_24_1_261219.ScanId;v=1;d1=16346.16346.2	controllerType=0 controllerNumber=1 scan=16346	37.0693
18044:2	1	S.M[+15.995]PLPPHPGHP[+15.995]GYINF.S		M[+16], P[+16]	853.417	2	1705.83	1705.82	0	6.5	17	Non	511.27	511.27	7.46	5.48	1304	>sp|P02817|AMELX_BOVIN Amelogenin, X isoform OS=Bos taurus OX=9913 GN=AMELX PE=1 SV=2	1	hf1_10472_ebo_24_1_261219.ScanId;v=1;d1=14350.14350.2	controllerType=0 controllerNumber=1 scan=14350	33.627
17734:2	1	S.M[+15.995]PLPPHPGHPGY[+15.995]INF.S		M[+16], Y[+16]	853.416	2	1705.82	1705.82	0	4.9	17	Non	534.96	534.96	0	5.08	1304	>sp|P02817|AMELX_BOVIN Amelogenin, X isoform OS=Bos taurus OX=9913 GN=AMELX PE=1 SV=2	1	hf1_10472_ebo_24_1_261219.ScanId;v=1;d1=14144.14144.2	controllerType=0 controllerNumber=1 scan=14144	33.2739
18334:2	1	S.M[+15.995]PLPPHPGHPGY[+15.995]INF.S		M[+16], Y[+16]	853.418	2	1705.83	1705.82	0	7.3	17	Non	549.49	549.49	0	5.46	1304	>sp|P02817|AMELX_BOVIN Amelogenin, X isoform OS=Bos taurus OX=9913 GN=AMELX PE=1 SV=2	1	hf1_10472_ebo_24_1_261219.ScanId;v=1;d1=14554.14554.2	controllerType=0 controllerNumber=1 scan=14554	33.9776
47144:3	1	S.MPLPPHPGHPGYINFS[+79.966].Y		S[+80]	614.284	3	1840.84	1840.82	0	7.8	17	Non	170.4	170.4	137.69	2.47	1304	>sp|P02817|AMELX_BOVIN Amelogenin, X isoform OS=Bos taurus OX=9913 GN=AMELX PE=1 SV=2	1	hf1_10472_ebo_24_1_261219.ScanId;v=1;d1=34729.34729.3	controllerType=0 controllerNumber=1 scan=34729	73.513
47200:3	1	S.MP[+15.995]LPPHPGHPGYINFS.Y		P[+16]	592.96	3	1776.87	1776.85	0	7.8	17	Non	172.87	172.87	4	2.26	1304	>sp|P02817|AMELX_BOVIN Amelogenin, X isoform OS=Bos taurus OX=9913 GN=AMELX PE=1 SV=2	1	hf1_10472_ebo_24_1_261219.ScanId;v=1;d1=34772.34772.3	controllerType=0 controllerNumber=1 scan=34772	73.588
18688:3	1	S.MP[+15.995]LPPHPGHPGYINFS.Y		P[+16]	592.959	3	1776.86	1776.85	0	5.9	17	Non	225.26	101	4	1.16	1304	>sp|P02817|AMELX_BOVIN Amelogenin, X isoform OS=Bos taurus OX=9913 GN=AMELX PE=1 SV=2	1	hf1_10472_ebo_24_1_261219.ScanId;v=1;d1=14798.14798.3	controllerType=0 controllerNumber=1 scan=14798	34.3952
18396:3	1	S.MP[+15.995]LPPHPGHPGYINFS.Y		P[+16]	592.959	3	1776.86	1776.85	0	5.5	17	Non	256.06	206.7	4	3.46	1304	>sp|P02817|AMELX_BOVIN Amelogenin, X isoform OS=Bos taurus OX=9913 GN=AMELX PE=1 SV=2	1	hf1_10472_ebo_24_1_261219.ScanId;v=1;d1=14597.14597.3	controllerType=0 controllerNumber=1 scan=14597	34.0515
24302:3	1	S.MPLPPHPGHPGYINFS[+79.966].Y		S[+80]	614.284	3	1840.84	1840.82	0	6.9	17	Non	260.8	260.8	163.85	3.43	1304	>sp|P02817|AMELX_BOVIN Amelogenin, X isoform OS=Bos taurus OX=9913 GN=AMELX PE=1 SV=2	1	hf1_10472_ebo_24_1_261219.ScanId;v=1;d1=18615.18615.3	controllerType=0 controllerNumber=1 scan=18615	40.9883
24204:3	1	S.MPLPPHPGHPGYINFS[+79.966].Y		S[+80]	614.285	3	1840.84	1840.82	0	8.8	17	Non	263.98	263.98	198.42	2.91	1304	>sp|P02817|AMELX_BOVIN Amelogenin, X isoform OS=Bos taurus OX=9913 GN=AMELX PE=1 SV=2	1	hf1_10472_ebo_24_1_261219.ScanId;v=1;d1=18541.18541.4	controllerType=0 controllerNumber=1 scan=18541	40.864
16950:3	1	S.MP[+15.995]LPPHPGHPGYINFS.Y		P[+16]	592.957	3	1776.86	1776.85	0	2.6	17	Non	288.51	203.15	4	3.02	1304	>sp|P02817|AMELX_BOVIN Amelogenin, X isoform OS=Bos taurus OX=9913 GN=AMELX PE=1 SV=2	1	hf1_10472_ebo_24_1_261219.ScanId;v=1;d1=13589.13589.3	controllerType=0 controllerNumber=1 scan=13589	32.3177
17816:3	1	S.MP[+15.995]LPPHPGHPGYINFS.Y		P[+16]	592.958	3	1776.86	1776.85	0	4.6	17	Non	296.19	209.27	4	3.65	1304	>sp|P02817|AMELX_BOVIN Amelogenin, X isoform OS=Bos taurus OX=9913 GN=AMELX PE=1 SV=2	1	hf1_10472_ebo_24_1_261219.ScanId;v=1;d1=14197.14197.3	controllerType=0 controllerNumber=1 scan=14197	33.3652
24020:3	1	S.MPLPPHPGHPGYINFS[+79.966].Y		S[+80]	614.283	3	1840.83	1840.82	0	5.7	17	Non	304.57	304.57	205.46	3.52	1304	>sp|P02817|AMELX_BOVIN Amelogenin, X isoform OS=Bos taurus OX=9913 GN=AMELX PE=1 SV=2	1	hf1_10472_ebo_24_1_261219.ScanId;v=1;d1=18415.18415.3	controllerType=0 controllerNumber=1 scan=18415	40.6442
23831:2	1	S.MPLPPHPGHPGYINFS[+79.966].Y		S[+80]	920.919	2	1840.83	1840.82	0	4	17	Non	310.88	310.88	124.57	3.63	1304	>sp|P02817|AMELX_BOVIN Amelogenin, X isoform OS=Bos taurus OX=9913 GN=AMELX PE=1 SV=2	1	hf1_10472_ebo_24_1_261219.ScanId;v=1;d1=18288.18288.4	controllerType=0 controllerNumber=1 scan=18288	40.4236
18108:3	1	S.MP[+15.995]LPPHPGHPGYINFS.Y		P[+16]	592.959	3	1776.86	1776.85	0	5.9	17	Non	340.22	280.92	4	3.99	1304	>sp|P02817|AMELX_BOVIN Amelogenin, X isoform OS=Bos taurus OX=9913 GN=AMELX PE=1 SV=2	1	hf1_10472_ebo_24_1_261219.ScanId;v=1;d1=14399.14399.3	controllerType=0 controllerNumber=1 scan=14399	33.7141
17235:3	1	S.MP[+15.995]LPPHPGHPGYINFS.Y		P[+16]	592.958	3	1776.86	1776.85	0	4.1	17	Non	349.81	291.68	4	3.59	1304	>sp|P02817|AMELX_BOVIN Amelogenin, X isoform OS=Bos taurus OX=9913 GN=AMELX PE=1 SV=2	1	hf1_10472_ebo_24_1_261219.ScanId;v=1;d1=13789.13789.3	controllerType=0 controllerNumber=1 scan=13789	32.6622
23861:2	1	S.MPLPPHPGHPGYINFS[+79.966].Y		S[+80]	920.92	2	1840.83	1840.82	0	5.1	17	Non	353.12	353.12	140.21	4.01	1304	>sp|P02817|AMELX_BOVIN Amelogenin, X isoform OS=Bos taurus OX=9913 GN=AMELX PE=1 SV=2	1	hf1_10472_ebo_24_1_261219.ScanId;v=1;d1=18307.18307.4	controllerType=0 controllerNumber=1 scan=18307	40.4576
17525:3	1	S.MP[+15.995]LPPHPGHPGYINFS.Y		P[+16]	592.958	3	1776.86	1776.85	0	3.8	17	Non	354.65	275.44	4	3.45	1304	>sp|P02817|AMELX_BOVIN Amelogenin, X isoform OS=Bos taurus OX=9913 GN=AMELX PE=1 SV=2	1	hf1_10472_ebo_24_1_261219.ScanId;v=1;d1=13995.13995.3	controllerType=0 controllerNumber=1 scan=13995	33.0134
18105:2	1	S.M[+15.995]PLPPHPGHPGYINFS.Y		M[+16]	888.937	2	1776.87	1776.85	0	7.3	17	Non	405.88	224.36	21.38	3.96	1304	>sp|P02817|AMELX_BOVIN Amelogenin, X isoform OS=Bos taurus OX=9913 GN=AMELX PE=1 SV=2	1	hf1_10472_ebo_24_1_261219.ScanId;v=1;d1=14395.14395.2	controllerType=0 controllerNumber=1 scan=14395	33.7053
23414:3	1	S.MPLPPHPGHPGYINFS[+79.966].Y		S[+80]	614.284	3	1840.84	1840.82	0	7.2	17	Non	455.81	369.46	268.06	5.35	1304	>sp|P02817|AMELX_BOVIN Amelogenin, X isoform OS=Bos taurus OX=9913 GN=AMELX PE=1 SV=2	1	hf1_10472_ebo_24_1_261219.ScanId;v=1;d1=18015.18015.3	controllerType=0 controllerNumber=1 scan=18015	39.9518
23717:3	1	S.MPLPPHPGHPGYINFS[+79.966].Y		S[+80]	614.284	3	1840.84	1840.82	0	6.6	17	Non	467.58	374.24	298.64	5.35	1304	>sp|P02817|AMELX_BOVIN Amelogenin, X isoform OS=Bos taurus OX=9913 GN=AMELX PE=1 SV=2	1	hf1_10472_ebo_24_1_261219.ScanId;v=1;d1=18214.18214.3	controllerType=0 controllerNumber=1 scan=18214	40.2979
22822:3	1	S.MPLPPHPGHPGYINFS[+79.966].Y		S[+80]	614.284	3	1840.84	1840.82	0	7.3	17	Non	480.91	378.96	300.89	5.45	1304	>sp|P02817|AMELX_BOVIN Amelogenin, X isoform OS=Bos taurus OX=9913 GN=AMELX PE=1 SV=2	1	hf1_10472_ebo_24_1_261219.ScanId;v=1;d1=17619.17619.3	controllerType=0 controllerNumber=1 scan=17619	39.265
23119:3	1	S.MPLPPHPGHPGYINFS[+79.966].Y		S[+80]	614.284	3	1840.84	1840.82	0	7.6	17	Non	486.59	486.59	318.38	6.13	1304	>sp|P02817|AMELX_BOVIN Amelogenin, X isoform OS=Bos taurus OX=9913 GN=AMELX PE=1 SV=2	1	hf1_10472_ebo_24_1_261219.ScanId;v=1;d1=17817.17817.3	controllerType=0 controllerNumber=1 scan=17817	39.6071
17139:2	1	S.M[+15.995]PLPPHPGHPGYINFS.Y		M[+16]	888.937	2	1776.87	1776.85	0	7.5	17	Non	486.72	413.1	47.27	5.57	1304	>sp|P02817|AMELX_BOVIN Amelogenin, X isoform OS=Bos taurus OX=9913 GN=AMELX PE=1 SV=2	1	hf1_10472_ebo_24_1_261219.ScanId;v=1;d1=13721.13721.2	controllerType=0 controllerNumber=1 scan=13721	32.5445
22690:2	1	S.MPLPPHPGHPGYINFS[+79.966].Y		S[+80]	920.923	2	1840.84	1840.82	0	8.2	17	Non	489.33	489.33	239.11	5.37	1304	>sp|P02817|AMELX_BOVIN Amelogenin, X isoform OS=Bos taurus OX=9913 GN=AMELX PE=1 SV=2	1	hf1_10472_ebo_24_1_261219.ScanId;v=1;d1=17531.17531.2	controllerType=0 controllerNumber=1 scan=17531	39.1103
17444:2	1	S.M[+15.995]PLPPHPGHPGYINFS.Y		M[+16]	888.933	2	1776.86	1776.85	0	3.6	17	Non	489.5	359.37	38.13	4.16	1304	>sp|P02817|AMELX_BOVIN Amelogenin, X isoform OS=Bos taurus OX=9913 GN=AMELX PE=1 SV=2	1	hf1_10472_ebo_24_1_261219.ScanId;v=1;d1=13937.13937.2	controllerType=0 controllerNumber=1 scan=13937	32.9136
23292:2	1	S.MPLPPHPGHPGYINFS[+79.966].Y		S[+80]	920.923	2	1840.84	1840.82	0	7.7	17	Non	577.24	441.65	338.63	6.63	1304	>sp|P02817|AMELX_BOVIN Amelogenin, X isoform OS=Bos taurus OX=9913 GN=AMELX PE=1 SV=2	1	hf1_10472_ebo_24_1_261219.ScanId;v=1;d1=17931.17931.2	controllerType=0 controllerNumber=1 scan=17931	39.8041
22986:2	1	S.MPLPPHPGHPGYINFS[+79.966].Y		S[+80]	920.923	2	1840.84	1840.82	0	8.2	17	Non	610.23	610.23	278.23	7.4	1304	>sp|P02817|AMELX_BOVIN Amelogenin, X isoform OS=Bos taurus OX=9913 GN=AMELX PE=1 SV=2	1	hf1_10472_ebo_24_1_261219.ScanId;v=1;d1=17729.17729.2	controllerType=0 controllerNumber=1 scan=17729	39.4553
23038:3	1	S.MP[+15.995]LPPHPGHPGYINFS[+79.966].Y		P[+16], S[+80]	619.611	3	1856.82	1856.82	0	-0.9	17	Non	164.83	164.83	5.8	1.31	1304	>sp|P02817|AMELX_BOVIN Amelogenin, X isoform OS=Bos taurus OX=9913 GN=AMELX PE=1 SV=2	1	hf1_10472_ebo_24_1_261219.ScanId;v=1;d1=17762.17762.3	controllerType=0 controllerNumber=1 scan=17762	39.5118
22475:2	1	S.M[+15.995]PLPPHPGHPGYINFS[+79.966].Y		M[+16], S[+80]	928.911	2	1856.81	1856.82	0	-2.8	17	Non	182.68	182.68	1.71	2.18	1304	>sp|P02817|AMELX_BOVIN Amelogenin, X isoform OS=Bos taurus OX=9913 GN=AMELX PE=1 SV=2	1	hf1_10472_ebo_24_1_261219.ScanId;v=1;d1=17386.17386.2	controllerType=0 controllerNumber=1 scan=17386	38.8605
20897:3	1	S.MP[+31.990]LPPHPGHPGYINFS[+79.966].Y		P[+32], S[+80]	624.941	3	1872.81	1872.81	0	-3.6	17	Non	215.07	215.07	1.8	2.19	1304	>sp|P02817|AMELX_BOVIN Amelogenin, X isoform OS=Bos taurus OX=9913 GN=AMELX PE=1 SV=2	1	hf1_10472_ebo_24_1_261219.ScanId;v=1;d1=16325.16325.4	controllerType=0 controllerNumber=1 scan=16325	37.0332
20535:3	1	S.MP[+31.990]LPPHPGHPGYINFS[+79.966].Y		P[+32], S[+80]	624.946	3	1872.82	1872.81	0	4.4	17	Non	228.19	193.02	1.8	2.48	1304	>sp|P02817|AMELX_BOVIN Amelogenin, X isoform OS=Bos taurus OX=9913 GN=AMELX PE=1 SV=2	1	hf1_10472_ebo_24_1_261219.ScanId;v=1;d1=16094.16094.3	controllerType=0 controllerNumber=1 scan=16094	36.6334
21041:3	1	S.MP[+31.990]LPPHPGHPGYINFS[+79.966].Y		P[+32], S[+80]	624.946	3	1872.82	1872.81	0	5	17	Non	233.57	185.98	1.8	2.48	1304	>sp|P02817|AMELX_BOVIN Amelogenin, X isoform OS=Bos taurus OX=9913 GN=AMELX PE=1 SV=2	1	hf1_10472_ebo_24_1_261219.ScanId;v=1;d1=16420.16420.3	controllerType=0 controllerNumber=1 scan=16420	37.1965
22429:3	1	S.MP[+15.995]LPPHPGHPGYINFS[+79.966].Y		P[+16], S[+80]	619.609	3	1856.81	1856.82	0	-3.8	17	Non	267.36	267.36	5.8	2.59	1304	>sp|P02817|AMELX_BOVIN Amelogenin, X isoform OS=Bos taurus OX=9913 GN=AMELX PE=1 SV=2	1	hf1_10472_ebo_24_1_261219.ScanId;v=1;d1=17356.17356.3	controllerType=0 controllerNumber=1 scan=17356	38.8084
20532:3	1	S.MP[+15.995]LPPHPGHPGYINFS[+79.966].Y		P[+16], S[+80]	619.612	3	1856.82	1856.82	0	1.5	17	Non	274.54	274.54	4	3.05	1304	>sp|P02817|AMELX_BOVIN Amelogenin, X isoform OS=Bos taurus OX=9913 GN=AMELX PE=1 SV=2	1	hf1_10472_ebo_24_1_261219.ScanId;v=1;d1=16092.16092.3	controllerType=0 controllerNumber=1 scan=16092	36.6304
21728:3	1	S.M[+15.995]PLPPHPGHPGYINFS[+79.966].Y		M[+16], S[+80]	619.609	3	1856.81	1856.82	0	-4.1	17	Non	291	291	0.25	2.96	1304	>sp|P02817|AMELX_BOVIN Amelogenin, X isoform OS=Bos taurus OX=9913 GN=AMELX PE=1 SV=2	1	hf1_10472_ebo_24_1_261219.ScanId;v=1;d1=16888.16888.3	controllerType=0 controllerNumber=1 scan=16888	37.9971
21436:3	1	S.M[+15.995]PLPPHPGHPGYINFS[+79.966].Y		M[+16], S[+80]	619.609	3	1856.81	1856.82	0	-3.2	17	Non	297	297	2.7	2.96	1304	>sp|P02817|AMELX_BOVIN Amelogenin, X isoform OS=Bos taurus OX=9913 GN=AMELX PE=1 SV=2	1	hf1_10472_ebo_24_1_261219.ScanId;v=1;d1=16690.16690.3	controllerType=0 controllerNumber=1 scan=16690	37.6595
47178:2	1	S.MP[+15.995]LPPHPGHPGYINFS[+79.966].Y		P[+16], S[+80]	928.919	2	1856.83	1856.82	0	6.6	17	Non	299.45	299.45	9.04	4.12	1304	>sp|P02817|AMELX_BOVIN Amelogenin, X isoform OS=Bos taurus OX=9913 GN=AMELX PE=1 SV=2	1	hf1_10472_ebo_24_1_261219.ScanId;v=1;d1=34755.34755.3	controllerType=0 controllerNumber=1 scan=34755	73.5568
19069:3	1	S.M[+15.995]PLPPHPGHPGYINFS[+79.966].Y		M[+16], S[+80]	619.614	3	1856.83	1856.82	0	5	17	Non	300.89	300.89	6.97	3.93	1304	>sp|P02817|AMELX_BOVIN Amelogenin, X isoform OS=Bos taurus OX=9913 GN=AMELX PE=1 SV=2	1	hf1_10472_ebo_24_1_261219.ScanId;v=1;d1=15081.15081.3	controllerType=0 controllerNumber=1 scan=15081	34.888
20843:3	1	S.MP[+15.995]LPPHPGHPGYINFS[+79.966].Y		P[+16], S[+80]	619.612	3	1856.82	1856.82	0	1.1	17	Non	309.59	309.59	4	3.21	1304	>sp|P02817|AMELX_BOVIN Amelogenin, X isoform OS=Bos taurus OX=9913 GN=AMELX PE=1 SV=2	1	hf1_10472_ebo_24_1_261219.ScanId;v=1;d1=16288.16288.3	controllerType=0 controllerNumber=1 scan=16288	36.9714
21143:3	1	S.M[+15.995]PLPPHPGHPGYINFS[+79.966].Y		M[+16], S[+80]	619.611	3	1856.82	1856.82	0	-0.2	17	Non	319.2	319.2	2.11	3.09	1304	>sp|P02817|AMELX_BOVIN Amelogenin, X isoform OS=Bos taurus OX=9913 GN=AMELX PE=1 SV=2	1	hf1_10472_ebo_24_1_261219.ScanId;v=1;d1=16492.16492.3	controllerType=0 controllerNumber=1 scan=16492	37.3206
18807:3	1	S.MP[+15.995]LPPHPGHPGYINFS[+79.966].Y		P[+16], S[+80]	619.615	3	1856.83	1856.82	0	6.3	17	Non	325.14	325.14	4	4.14	1304	>sp|P02817|AMELX_BOVIN Amelogenin, X isoform OS=Bos taurus OX=9913 GN=AMELX PE=1 SV=2	1	hf1_10472_ebo_24_1_261219.ScanId;v=1;d1=14883.14883.3	controllerType=0 controllerNumber=1 scan=14883	34.5418
20241:3	1	S.M[+15.995]PLPPHPGHPGYINFS[+79.966].Y		M[+16], S[+80]	619.613	3	1856.83	1856.82	0	3.5	17	Non	346.55	346.55	16.45	3.66	1304	>sp|P02817|AMELX_BOVIN Amelogenin, X isoform OS=Bos taurus OX=9913 GN=AMELX PE=1 SV=2	1	hf1_10472_ebo_24_1_261219.ScanId;v=1;d1=15895.15895.3	controllerType=0 controllerNumber=1 scan=15895	36.2883
19638:3	1	S.M[+15.995]PLPPHPGHPGYINFS[+79.966].Y		M[+16], S[+80]	619.615	3	1856.83	1856.82	0	5.5	17	Non	348.19	348.19	5.11	4.1	1304	>sp|P02817|AMELX_BOVIN Amelogenin, X isoform OS=Bos taurus OX=9913 GN=AMELX PE=1 SV=2	1	hf1_10472_ebo_24_1_261219.ScanId;v=1;d1=15489.15489.3	controllerType=0 controllerNumber=1 scan=15489	35.588
24352:2	1	S.MPLPPHPGHPGYIN[+0.984]FS[+79.966].Y		N[+1], S[+80]	921.413	2	1841.82	1841.81	0	5.6	17	Non	365.79	334.16	239.92	4.44	1304	>sp|P02817|AMELX_BOVIN Amelogenin, X isoform OS=Bos taurus OX=9913 GN=AMELX PE=1 SV=2	1	hf1_10472_ebo_24_1_261219.ScanId;v=1;d1=18649.18649.2	controllerType=0 controllerNumber=1 scan=18649	41.048
19350:3	1	S.M[+15.995]PLPPHPGHPGYINFS[+79.966].Y		M[+16], S[+80]	619.614	3	1856.83	1856.82	0	5	17	Non	375.92	375.92	5.82	5.01	1304	>sp|P02817|AMELX_BOVIN Amelogenin, X isoform OS=Bos taurus OX=9913 GN=AMELX PE=1 SV=2	1	hf1_10472_ebo_24_1_261219.ScanId;v=1;d1=15287.15287.3	controllerType=0 controllerNumber=1 scan=15287	35.24
18647:2	1	S.M[+15.995]PLPPHPGHPGYINFS[+79.966].Y		M[+16], S[+80]	928.91	2	1856.81	1856.82	0	-3.6	17	Non	380.45	380.45	25.27	4.32	1304	>sp|P02817|AMELX_BOVIN Amelogenin, X isoform OS=Bos taurus OX=9913 GN=AMELX PE=1 SV=2	1	hf1_10472_ebo_24_1_261219.ScanId;v=1;d1=14768.14768.2	controllerType=0 controllerNumber=1 scan=14768	34.3437
19938:3	1	S.M[+15.995]PLPPHPGHPGYINFS[+79.966].Y		M[+16], S[+80]	619.614	3	1856.83	1856.82	0	5.2	17	Non	390.67	373.57	26.49	5.01	1304	>sp|P02817|AMELX_BOVIN Amelogenin, X isoform OS=Bos taurus OX=9913 GN=AMELX PE=1 SV=2	1	hf1_10472_ebo_24_1_261219.ScanId;v=1;d1=15696.15696.3	controllerType=0 controllerNumber=1 scan=15696	35.9411
24303:3	1	S.MPLPPHPGHPGYIN[+0.984]FS[+79.966].Y		N[+1], S[+80]	614.611	3	1841.82	1841.81	0	5.7	17	Non	423.39	310.99	310.99	3.94	1304	>sp|P02817|AMELX_BOVIN Amelogenin, X isoform OS=Bos taurus OX=9913 GN=AMELX PE=1 SV=2	1	hf1_10472_ebo_24_1_261219.ScanId;v=1;d1=18615.18615.3	controllerType=0 controllerNumber=1 scan=18615	40.9883
24021:3	1	S.MPLPPHPGHPGYIN[+0.984]FS[+79.966].Y		N[+1], S[+80]	614.611	3	1841.82	1841.81	0	4.8	17	Non	428.28	333.58	316.66	3.82	1304	>sp|P02817|AMELX_BOVIN Amelogenin, X isoform OS=Bos taurus OX=9913 GN=AMELX PE=1 SV=2	1	hf1_10472_ebo_24_1_261219.ScanId;v=1;d1=18415.18415.3	controllerType=0 controllerNumber=1 scan=18415	40.6442
23955:2	1	S.MPLPPHPGHPGYIN[+0.984]FS[+79.966].Y		N[+1], S[+80]	921.41	2	1841.81	1841.81	0	2.1	17	Non	464.69	464.69	199.34	4.59	1304	>sp|P02817|AMELX_BOVIN Amelogenin, X isoform OS=Bos taurus OX=9913 GN=AMELX PE=1 SV=2	1	hf1_10472_ebo_24_1_261219.ScanId;v=1;d1=18370.18370.4	controllerType=0 controllerNumber=1 scan=18370	40.5675
21280:2	1	S.M[+15.995]PLPPHPGHPGYINFS[+79.966].Y		M[+16], S[+80]	928.91	2	1856.81	1856.82	0	-2.9	17	Non	497.59	497.59	21.08	4.3	1304	>sp|P02817|AMELX_BOVIN Amelogenin, X isoform OS=Bos taurus OX=9913 GN=AMELX PE=1 SV=2	1	hf1_10472_ebo_24_1_261219.ScanId;v=1;d1=16580.16580.2	controllerType=0 controllerNumber=1 scan=16580	37.4676
20965:2	1	S.M[+15.995]PLPPHPGHPGYINFS[+79.966].Y		M[+16], S[+80]	928.911	2	1856.81	1856.82	0	-2.4	17	Non	544.71	544.71	27.25	5	1304	>sp|P02817|AMELX_BOVIN Amelogenin, X isoform OS=Bos taurus OX=9913 GN=AMELX PE=1 SV=2	1	hf1_10472_ebo_24_1_261219.ScanId;v=1;d1=16371.16371.2	controllerType=0 controllerNumber=1 scan=16371	37.1129
20646:2	1	S.M[+15.995]PLPPHPGHPGYINFS[+79.966].Y		M[+16], S[+80]	928.912	2	1856.82	1856.82	0	-1	17	Non	555.67	555.67	25.94	5.3	1304	>sp|P02817|AMELX_BOVIN Amelogenin, X isoform OS=Bos taurus OX=9913 GN=AMELX PE=1 SV=2	1	hf1_10472_ebo_24_1_261219.ScanId;v=1;d1=16167.16167.2	controllerType=0 controllerNumber=1 scan=16167	36.7613
19460:2	1	S.M[+15.995]PLPPHPGHPGYINFS[+79.966].Y		M[+16], S[+80]	928.918	2	1856.83	1856.82	0	5.8	17	Non	558.42	558.42	31.44	6.03	1304	>sp|P02817|AMELX_BOVIN Amelogenin, X isoform OS=Bos taurus OX=9913 GN=AMELX PE=1 SV=2	1	hf1_10472_ebo_24_1_261219.ScanId;v=1;d1=15365.15365.2	controllerType=0 controllerNumber=1 scan=15365	35.3717
20353:2	1	S.M[+15.995]PLPPHPGHPGYINFS[+79.966].Y		M[+16], S[+80]	928.914	2	1856.82	1856.82	0	1.3	17	Non	562.44	562.44	15.19	5.8	1304	>sp|P02817|AMELX_BOVIN Amelogenin, X isoform OS=Bos taurus OX=9913 GN=AMELX PE=1 SV=2	1	hf1_10472_ebo_24_1_261219.ScanId;v=1;d1=15970.15970.2	controllerType=0 controllerNumber=1 scan=15970	36.4217
18909:2	1	S.M[+15.995]PLPPHPGHPGYINFS[+79.966].Y		M[+16], S[+80]	928.919	2	1856.83	1856.82	0	5.9	17	Non	564.95	564.95	27.4	6.39	1304	>sp|P02817|AMELX_BOVIN Amelogenin, X isoform OS=Bos taurus OX=9913 GN=AMELX PE=1 SV=2	1	hf1_10472_ebo_24_1_261219.ScanId;v=1;d1=14963.14963.2	controllerType=0 controllerNumber=1 scan=14963	34.6833
19182:2	1	S.M[+15.995]PLPPHPGHPGYINFS[+79.966].Y		M[+16], S[+80]	928.918	2	1856.83	1856.82	0	5.7	17	Non	582.23	582.23	33.36	6.84	1304	>sp|P02817|AMELX_BOVIN Amelogenin, X isoform OS=Bos taurus OX=9913 GN=AMELX PE=1 SV=2	1	hf1_10472_ebo_24_1_261219.ScanId;v=1;d1=15165.15165.2	controllerType=0 controllerNumber=1 scan=15165	35.0272
20041:2	1	S.M[+15.995]PLPPHPGHPGYINFS[+79.966].Y		M[+16], S[+80]	928.919	2	1856.83	1856.82	0	6.4	17	Non	589.58	589.58	29.29	7.08	1304	>sp|P02817|AMELX_BOVIN Amelogenin, X isoform OS=Bos taurus OX=9913 GN=AMELX PE=1 SV=2	1	hf1_10472_ebo_24_1_261219.ScanId;v=1;d1=15765.15765.2	controllerType=0 controllerNumber=1 scan=15765	36.0626
19739:2	1	S.M[+15.995]PLPPHPGHPGYINFS[+79.966].Y		M[+16], S[+80]	928.919	2	1856.83	1856.82	0	6.2	17	Non	662.59	662.59	50.2	8.84	1304	>sp|P02817|AMELX_BOVIN Amelogenin, X isoform OS=Bos taurus OX=9913 GN=AMELX PE=1 SV=2	1	hf1_10472_ebo_24_1_261219.ScanId;v=1;d1=15564.15564.2	controllerType=0 controllerNumber=1 scan=15564	35.7167
22529:3	1	S.MPLPPHPGHP[+15.995]GY[+31.990]INF[+31.990]S.Y		F[+32], P[+16], Y[+32]	614.286	3	1840.84	1840.83	0	5.6	17	Non	169.62	169.62	5.37	1.25	1304	>sp|P02817|AMELX_BOVIN Amelogenin, X isoform OS=Bos taurus OX=9913 GN=AMELX PE=1 SV=2	1	hf1_10472_ebo_24_1_261219.ScanId;v=1;d1=17421.17421.3	controllerType=0 controllerNumber=1 scan=17421	38.9217
20227:3	1	S.MP[+15.995]LPPH[+15.995]PGHPGYINFS[+79.966].Y		H[+16], P[+16], S[+80]	624.946	3	1872.82	1872.81	0	5	17	Non	222.67	222.67	4	2.61	1304	>sp|P02817|AMELX_BOVIN Amelogenin, X isoform OS=Bos taurus OX=9913 GN=AMELX PE=1 SV=2	1	hf1_10472_ebo_24_1_261219.ScanId;v=1;d1=15886.15886.3	controllerType=0 controllerNumber=1 scan=15886	36.2719
19338:3	1	S.MP[+15.995]LPPHPGHP[+15.995]GYINFS[+79.966].Y		P[+16]*2, S[+80]	624.944	3	1872.82	1872.81	0	1.6	17	Non	261.56	261.56	4	3.05	1304	>sp|P02817|AMELX_BOVIN Amelogenin, X isoform OS=Bos taurus OX=9913 GN=AMELX PE=1 SV=2	1	hf1_10472_ebo_24_1_261219.ScanId;v=1;d1=15279.15279.3	controllerType=0 controllerNumber=1 scan=15279	35.2253
22738:3	1	S.MP[+15.995]LPPHPGHPGYIN[+0.984]FS[+79.966].Y		N[+1], P[+16], S[+80]	619.943	3	1857.81	1857.8	0	5.7	17	Non	271.13	271.13	4	3.45	1304	>sp|P02817|AMELX_BOVIN Amelogenin, X isoform OS=Bos taurus OX=9913 GN=AMELX PE=1 SV=2	1	hf1_10472_ebo_24_1_261219.ScanId;v=1;d1=17562.17562.3	controllerType=0 controllerNumber=1 scan=17562	39.1644
19055:3	1	S.MP[+15.995]LPPHPGHP[+15.995]GYINFS[+79.966].Y		P[+16]*2, S[+80]	624.947	3	1872.83	1872.81	0	6.2	17	Non	277.27	277.27	3.71	3.83	1304	>sp|P02817|AMELX_BOVIN Amelogenin, X isoform OS=Bos taurus OX=9913 GN=AMELX PE=1 SV=2	1	hf1_10472_ebo_24_1_261219.ScanId;v=1;d1=15071.15071.3	controllerType=0 controllerNumber=1 scan=15071	34.8702
18267:3	1	S.M[+15.995]PLPPHPGHPGY[+15.995]INFS[+79.966].Y		M[+16], S[+80], Y[+16]	624.947	3	1872.83	1872.81	0	6.5	17	Non	293.06	293.06	0	4.01	1304	>sp|P02817|AMELX_BOVIN Amelogenin, X isoform OS=Bos taurus OX=9913 GN=AMELX PE=1 SV=2	1	hf1_10472_ebo_24_1_261219.ScanId;v=1;d1=14509.14509.3	controllerType=0 controllerNumber=1 scan=14509	33.9033
18795:3	1	S.M[+15.995]PLPPHPGHP[+15.995]GYINFS[+79.966].Y		M[+16], P[+16], S[+80]	624.947	3	1872.82	1872.81	0	5.9	17	Non	302.12	302.12	3.77	3.93	1304	>sp|P02817|AMELX_BOVIN Amelogenin, X isoform OS=Bos taurus OX=9913 GN=AMELX PE=1 SV=2	1	hf1_10472_ebo_24_1_261219.ScanId;v=1;d1=14872.14872.3	controllerType=0 controllerNumber=1 scan=14872	34.5231
19920:3	1	S.MP[+15.995]LPPHPGHP[+15.995]GYINFS[+79.966].Y		P[+16]*2, S[+80]	624.941	3	1872.81	1872.81	0	-2.3	17	Non	328.09	328.09	4	3.07	1304	>sp|P02817|AMELX_BOVIN Amelogenin, X isoform OS=Bos taurus OX=9913 GN=AMELX PE=1 SV=2	1	hf1_10472_ebo_24_1_261219.ScanId;v=1;d1=15685.15685.3	controllerType=0 controllerNumber=1 scan=15685	35.9218
17844:2	1	S.M[+15.995]PLPPHPGHPGY[+15.995]INFS[+79.966].Y		M[+16], S[+80], Y[+16]	936.917	2	1872.83	1872.81	0	7	17	Non	375.89	375.89	0	5.32	1304	>sp|P02817|AMELX_BOVIN Amelogenin, X isoform OS=Bos taurus OX=9913 GN=AMELX PE=1 SV=2	1	hf1_10472_ebo_24_1_261219.ScanId;v=1;d1=14215.14215.2	controllerType=0 controllerNumber=1 scan=14215	33.395
22171:2	1	S.M[+15.995]PLPPHPGHPGYIN[+0.984]FS[+79.966].Y		M[+16], N[+1], S[+80]	929.409	2	1857.81	1857.8	0	4.5	17	Non	384.51	356.65	24.06	4.16	1304	>sp|P02817|AMELX_BOVIN Amelogenin, X isoform OS=Bos taurus OX=9913 GN=AMELX PE=1 SV=2	1	hf1_10472_ebo_24_1_261219.ScanId;v=1;d1=17184.17184.2	controllerType=0 controllerNumber=1 scan=17184	38.5098
21437:3	1	S.M[+15.995]PLPPHPGHPGYIN[+0.984]FS[+79.966].Y		M[+16], N[+1], S[+80]	619.943	3	1857.81	1857.8	0	6.3	17	Non	418.34	392.41	6.07	5.16	1304	>sp|P02817|AMELX_BOVIN Amelogenin, X isoform OS=Bos taurus OX=9913 GN=AMELX PE=1 SV=2	1	hf1_10472_ebo_24_1_261219.ScanId;v=1;d1=16690.16690.3	controllerType=0 controllerNumber=1 scan=16690	37.6595
22430:3	1	S.MP[+15.995]LPPHPGHPGYIN[+0.984]FS[+79.966].Y		N[+1], P[+16], S[+80]	619.943	3	1857.82	1857.8	0	7	17	Non	443.32	418.49	0.66	5.35	1304	>sp|P02817|AMELX_BOVIN Amelogenin, X isoform OS=Bos taurus OX=9913 GN=AMELX PE=1 SV=2	1	hf1_10472_ebo_24_1_261219.ScanId;v=1;d1=17356.17356.3	controllerType=0 controllerNumber=1 scan=17356	38.8084
21729:3	1	S.M[+15.995]PLPPHPGHPGYIN[+0.984]FS[+79.966].Y		M[+16], N[+1], S[+80]	619.943	3	1857.81	1857.8	0	6.2	17	Non	455.92	428.04	4.12	5.79	1304	>sp|P02817|AMELX_BOVIN Amelogenin, X isoform OS=Bos taurus OX=9913 GN=AMELX PE=1 SV=2	1	hf1_10472_ebo_24_1_261219.ScanId;v=1;d1=16888.16888.3	controllerType=0 controllerNumber=1 scan=16888	37.9971
22031:3	1	S.M[+15.995]PLPPHPGHPGYIN[+0.984]FS[+79.966].Y		M[+16], N[+1], S[+80]	619.943	3	1857.81	1857.8	0	5.5	17	Non	472.28	399.91	0.36	5.11	1304	>sp|P02817|AMELX_BOVIN Amelogenin, X isoform OS=Bos taurus OX=9913 GN=AMELX PE=1 SV=2	1	hf1_10472_ebo_24_1_261219.ScanId;v=1;d1=17086.17086.3	controllerType=0 controllerNumber=1 scan=17086	38.338
21865:2	1	S.M[+15.995]PLPPHPGHPGYIN[+0.984]FS[+79.966].Y		M[+16], N[+1], S[+80]	929.412	2	1857.82	1857.8	0	7.7	17	Non	520.1	464.16	31.77	5.59	1304	>sp|P02817|AMELX_BOVIN Amelogenin, X isoform OS=Bos taurus OX=9913 GN=AMELX PE=1 SV=2	1	hf1_10472_ebo_24_1_261219.ScanId;v=1;d1=16978.16978.2	controllerType=0 controllerNumber=1 scan=16978	38.1523
21563:2	1	S.M[+15.995]PLPPHPGHPGYIN[+0.984]FS[+79.966].Y		M[+16], N[+1], S[+80]	929.412	2	1857.82	1857.8	0	7.6	17	Non	562.58	496.43	28.35	6.63	1304	>sp|P02817|AMELX_BOVIN Amelogenin, X isoform OS=Bos taurus OX=9913 GN=AMELX PE=1 SV=2	1	hf1_10472_ebo_24_1_261219.ScanId;v=1;d1=16778.16778.2	controllerType=0 controllerNumber=1 scan=16778	37.8091
20647:2	1	S.M[+15.995]PLPPHPGHPGYIN[+0.984]FS[+79.966].Y		M[+16], N[+1], S[+80]	929.412	2	1857.82	1857.8	0	7.6	17	Non	572.26	496.96	33.04	6.63	1304	>sp|P02817|AMELX_BOVIN Amelogenin, X isoform OS=Bos taurus OX=9913 GN=AMELX PE=1 SV=2	1	hf1_10472_ebo_24_1_261219.ScanId;v=1;d1=16167.16167.2	controllerType=0 controllerNumber=1 scan=16167	36.7613
22584:2	1	S.M[+15.995]PLPPHPGHPGYINFS[+79.966]Y.E		M[+16], S[+80]	1010.45	2	2019.9	2019.88	0	8.8	17	Non	220.99	220.99	12.84	2.47	1304	>sp|P02817|AMELX_BOVIN Amelogenin, X isoform OS=Bos taurus OX=9913 GN=AMELX PE=1 SV=2	1	hf1_10472_ebo_24_1_261219.ScanId;v=1;d1=17456.17456.2	controllerType=0 controllerNumber=1 scan=17456	38.9803
22531:3	1	S.MP[+15.995]LPPHPGHPGYINFS[+79.966]Y.E		P[+16], S[+80]	673.971	3	2019.9	2019.88	0	8.1	17	Non	238.44	73.28	4	2.18	1304	>sp|P02817|AMELX_BOVIN Amelogenin, X isoform OS=Bos taurus OX=9913 GN=AMELX PE=1 SV=2	1	hf1_10472_ebo_24_1_261219.ScanId;v=1;d1=17422.17422.3	controllerType=0 controllerNumber=1 scan=17422	38.9232
23720:3	1	S.M[+15.995]PLPPHPGHPGYINFS[+79.966]Y.E		M[+16], S[+80]	673.968	3	2019.89	2019.88	0	4.2	17	Non	292.47	177.29	5.11	3.21	1304	>sp|P02817|AMELX_BOVIN Amelogenin, X isoform OS=Bos taurus OX=9913 GN=AMELX PE=1 SV=2	1	hf1_10472_ebo_24_1_261219.ScanId;v=1;d1=18215.18215.3	controllerType=0 controllerNumber=1 scan=18215	40.2994
23518:2	1	S.M[+15.995]PLPPHPGHPGYINFS[+79.966]Y.E		M[+16], S[+80]	1010.45	2	2019.89	2019.88	0	3.6	17	Non	347.15	347.15	20.17	3.96	1304	>sp|P02817|AMELX_BOVIN Amelogenin, X isoform OS=Bos taurus OX=9913 GN=AMELX PE=1 SV=2	1	hf1_10472_ebo_24_1_261219.ScanId;v=1;d1=18083.18083.2	controllerType=0 controllerNumber=1 scan=18083	40.0698
23418:3	1	S.M[+15.995]PLPPHPGHPGYINFS[+79.966]Y.E		M[+16], S[+80]	673.97	3	2019.9	2019.88	0	7.1	17	Non	368.18	196.16	5.73	3.58	1304	>sp|P02817|AMELX_BOVIN Amelogenin, X isoform OS=Bos taurus OX=9913 GN=AMELX PE=1 SV=2	1	hf1_10472_ebo_24_1_261219.ScanId;v=1;d1=18018.18018.3	controllerType=0 controllerNumber=1 scan=18018	39.9561
23120:3	1	S.M[+15.995]PLPPHPGHPGYINFS[+79.966]Y.E		M[+16], S[+80]	673.97	3	2019.9	2019.88	0	7	17	Non	408.98	181.75	13.26	3.69	1304	>sp|P02817|AMELX_BOVIN Amelogenin, X isoform OS=Bos taurus OX=9913 GN=AMELX PE=1 SV=2	1	hf1_10472_ebo_24_1_261219.ScanId;v=1;d1=17818.17818.3	controllerType=0 controllerNumber=1 scan=17818	39.6083
22872:2	1	S.M[+15.995]PLPPHPGHPGYINFS[+79.966]Y.E		M[+16], S[+80]	1010.45	2	2019.9	2019.88	0	8.8	17	Non	421.21	421.21	19.7	4.92	1304	>sp|P02817|AMELX_BOVIN Amelogenin, X isoform OS=Bos taurus OX=9913 GN=AMELX PE=1 SV=2	1	hf1_10472_ebo_24_1_261219.ScanId;v=1;d1=17653.17653.2	controllerType=0 controllerNumber=1 scan=17653	39.3234
23183:2	1	S.M[+15.995]PLPPHPGHPGYINFS[+79.966]Y.E		M[+16], S[+80]	1010.45	2	2019.9	2019.88	0	7.6	17	Non	433.04	433.04	33	5.5	1304	>sp|P02817|AMELX_BOVIN Amelogenin, X isoform OS=Bos taurus OX=9913 GN=AMELX PE=1 SV=2	1	hf1_10472_ebo_24_1_261219.ScanId;v=1;d1=17859.17859.2	controllerType=0 controllerNumber=1 scan=17859	39.6766
22823:3	1	S.M[+15.995]PLPPHPGHPGYINFS[+79.966]Y.E		M[+16], S[+80]	673.97	3	2019.89	2019.88	0	6.1	17	Non	435.53	229.57	22.83	3.89	1304	>sp|P02817|AMELX_BOVIN Amelogenin, X isoform OS=Bos taurus OX=9913 GN=AMELX PE=1 SV=2	1	hf1_10472_ebo_24_1_261219.ScanId;v=1;d1=17620.17620.3	controllerType=0 controllerNumber=1 scan=17620	39.2661
20170:3	1	S.MP[+15.995]LPPHPGHPGYINFSYE.V		P[+16]	690.33	3	2068.97	2068.96	0	7.7	17	Non	137.05	137.05	6.13	1.29	1304	>sp|P02817|AMELX_BOVIN Amelogenin, X isoform OS=Bos taurus OX=9913 GN=AMELX PE=1 SV=2	1	hf1_10472_ebo_24_1_261219.ScanId;v=1;d1=15848.15848.3	controllerType=0 controllerNumber=1 scan=15848	36.2047
24514:3	1	S.MPLPPHPGHPGYINFS[+79.966]YE.V		S[+80]	711.653	3	2132.94	2132.93	0	6.4	17	Non	194.4	194.4	137.58	2.26	1304	>sp|P02817|AMELX_BOVIN Amelogenin, X isoform OS=Bos taurus OX=9913 GN=AMELX PE=1 SV=2	1	hf1_10472_ebo_24_1_261219.ScanId;v=1;d1=18759.18759.3	controllerType=0 controllerNumber=1 scan=18759	41.2393
19688:3	1	S.MP[+15.995]LPPHPGHPGYINFSYE.V		P[+16]	690.33	3	2068.97	2068.96	0	7.5	17	Non	247.3	247.3	8.67	3.43	1304	>sp|P02817|AMELX_BOVIN Amelogenin, X isoform OS=Bos taurus OX=9913 GN=AMELX PE=1 SV=2	1	hf1_10472_ebo_24_1_261219.ScanId;v=1;d1=15521.15521.3	controllerType=0 controllerNumber=1 scan=15521	35.6433
19977:3	1	S.MP[+15.995]LPPHPGHPGYINFSYE.V		P[+16]	690.329	3	2068.97	2068.96	0	6.7	17	Non	286.42	286.42	4	4.16	1304	>sp|P02817|AMELX_BOVIN Amelogenin, X isoform OS=Bos taurus OX=9913 GN=AMELX PE=1 SV=2	1	hf1_10472_ebo_24_1_261219.ScanId;v=1;d1=15722.15722.3	controllerType=0 controllerNumber=1 scan=15722	35.9885
21369:3	1	S.M[+15.995]PLPPHPGHPGYINFS[+79.966]YE.V		M[+16], S[+80]	716.984	3	2148.94	2148.92	0	5.8	17	Non	283.54	283.54	17.72	3.77	1304	>sp|P02817|AMELX_BOVIN Amelogenin, X isoform OS=Bos taurus OX=9913 GN=AMELX PE=1 SV=2	1	hf1_10472_ebo_24_1_261219.ScanId;v=1;d1=16644.16644.3	controllerType=0 controllerNumber=1 scan=16644	37.5768
23170:3	1	S.M[+15.995]PLPPHPGHPGYINFS[+79.966]YE.V		M[+16], S[+80]	716.981	3	2148.93	2148.92	0	2.1	17	Non	361.36	361.36	18.21	4.23	1304	>sp|P02817|AMELX_BOVIN Amelogenin, X isoform OS=Bos taurus OX=9913 GN=AMELX PE=1 SV=2	1	hf1_10472_ebo_24_1_261219.ScanId;v=1;d1=17851.17851.3	controllerType=0 controllerNumber=1 scan=17851	39.6653
22722:2	1	S.M[+15.995]PLPPHPGHPGYINFS[+79.966]YE.V		M[+16], S[+80]	1074.97	2	2148.93	2148.92	0	4.1	17	Non	379.67	379.67	32.05	5.12	1304	>sp|P02817|AMELX_BOVIN Amelogenin, X isoform OS=Bos taurus OX=9913 GN=AMELX PE=1 SV=2	1	hf1_10472_ebo_24_1_261219.ScanId;v=1;d1=17551.17551.2	controllerType=0 controllerNumber=1 scan=17551	39.1456
22562:3	1	S.M[+15.995]PLPPHPGHPGYINFS[+79.966]YE.V		M[+16], S[+80]	716.984	3	2148.94	2148.92	0	5.9	17	Non	408.78	408.78	19.19	4.88	1304	>sp|P02817|AMELX_BOVIN Amelogenin, X isoform OS=Bos taurus OX=9913 GN=AMELX PE=1 SV=2	1	hf1_10472_ebo_24_1_261219.ScanId;v=1;d1=17442.17442.3	controllerType=0 controllerNumber=1 scan=17442	38.9568
22866:3	1	S.M[+15.995]PLPPHPGHPGYINFS[+79.966]YE.V		M[+16], S[+80]	716.981	3	2148.93	2148.92	0	1.1	17	Non	416.85	416.85	21.08	4.56	1304	>sp|P02817|AMELX_BOVIN Amelogenin, X isoform OS=Bos taurus OX=9913 GN=AMELX PE=1 SV=2	1	hf1_10472_ebo_24_1_261219.ScanId;v=1;d1=17648.17648.3	controllerType=0 controllerNumber=1 scan=17648	39.3131
21489:2	1	S.M[+15.995]PLPPHPGHPGYINFS[+79.966]YE.V		M[+16], S[+80]	1074.98	2	2148.94	2148.92	0	8.5	17	Non	444.55	444.55	44.44	4.69	1304	>sp|P02817|AMELX_BOVIN Amelogenin, X isoform OS=Bos taurus OX=9913 GN=AMELX PE=1 SV=2	1	hf1_10472_ebo_24_1_261219.ScanId;v=1;d1=16727.16727.2	controllerType=0 controllerNumber=1 scan=16727	37.7218
22423:2	1	S.M[+15.995]PLPPHPGHPGYINFS[+79.966]YE.V		M[+16], S[+80]	1074.98	2	2148.95	2148.92	0	9.8	17	Non	448.76	448.76	42.16	5.56	1304	>sp|P02817|AMELX_BOVIN Amelogenin, X isoform OS=Bos taurus OX=9913 GN=AMELX PE=1 SV=2	1	hf1_10472_ebo_24_1_261219.ScanId;v=1;d1=17352.17352.2	controllerType=0 controllerNumber=1 scan=17352	38.8026
21964:3	1	S.M[+15.995]PLPPHPGHPGYINFS[+79.966]YE.V		M[+16], S[+80]	716.984	3	2148.94	2148.92	0	5.6	17	Non	466.12	466.12	43.77	5.34	1304	>sp|P02817|AMELX_BOVIN Amelogenin, X isoform OS=Bos taurus OX=9913 GN=AMELX PE=1 SV=2	1	hf1_10472_ebo_24_1_261219.ScanId;v=1;d1=17042.17042.3	controllerType=0 controllerNumber=1 scan=17042	38.2627
21661:3	1	S.M[+15.995]PLPPHPGHPGYINFS[+79.966]YE.V		M[+16], S[+80]	716.984	3	2148.94	2148.92	0	6.4	17	Non	468.34	468.34	27.93	5.58	1304	>sp|P02817|AMELX_BOVIN Amelogenin, X isoform OS=Bos taurus OX=9913 GN=AMELX PE=1 SV=2	1	hf1_10472_ebo_24_1_261219.ScanId;v=1;d1=16844.16844.3	controllerType=0 controllerNumber=1 scan=16844	37.9217
22253:3	1	S.M[+15.995]PLPPHPGHPGYINFS[+79.966]YE.V		M[+16], S[+80]	716.984	3	2148.94	2148.92	0	6.1	17	Non	468.68	468.68	35.12	5.11	1304	>sp|P02817|AMELX_BOVIN Amelogenin, X isoform OS=Bos taurus OX=9913 GN=AMELX PE=1 SV=2	1	hf1_10472_ebo_24_1_261219.ScanId;v=1;d1=17242.17242.3	controllerType=0 controllerNumber=1 scan=17242	38.6115
21797:2	1	S.M[+15.995]PLPPHPGHPGYINFS[+79.966]YE.V		M[+16], S[+80]	1074.97	2	2148.94	2148.92	0	7.2	17	Non	495.61	495.61	41.72	5.8	1304	>sp|P02817|AMELX_BOVIN Amelogenin, X isoform OS=Bos taurus OX=9913 GN=AMELX PE=1 SV=2	1	hf1_10472_ebo_24_1_261219.ScanId;v=1;d1=16933.16933.2	controllerType=0 controllerNumber=1 scan=16933	38.0751
22116:2	1	S.M[+15.995]PLPPHPGHPGYINFS[+79.966]YE.V		M[+16], S[+80]	1074.97	2	2148.94	2148.92	0	5.9	17	Non	522.14	522.14	36.67	5.59	1304	>sp|P02817|AMELX_BOVIN Amelogenin, X isoform OS=Bos taurus OX=9913 GN=AMELX PE=1 SV=2	1	hf1_10472_ebo_24_1_261219.ScanId;v=1;d1=17146.17146.2	controllerType=0 controllerNumber=1 scan=17146	38.4432
23031:2	1	S.M[+15.995]PLPPHPGHPGYIN[+0.984]FS[+79.966]YE.V		M[+16], N[+1], S[+80]	1075.47	2	2149.92	2149.91	0	7.1	17	Non	258.74	258.74	18.27	3.94	1304	>sp|P02817|AMELX_BOVIN Amelogenin, X isoform OS=Bos taurus OX=9913 GN=AMELX PE=1 SV=2	1	hf1_10472_ebo_24_1_261219.ScanId;v=1;d1=17757.17757.2	controllerType=0 controllerNumber=1 scan=17757	39.5016
23171:3	1	S.M[+15.995]PLPPHPGHPGYIN[+0.984]FS[+79.966]YE.V		M[+16], N[+1], S[+80]	717.314	3	2149.93	2149.91	0	9.1	17	Non	296.1	296.1	24.43	3.44	1304	>sp|P02817|AMELX_BOVIN Amelogenin, X isoform OS=Bos taurus OX=9913 GN=AMELX PE=1 SV=2	1	hf1_10472_ebo_24_1_261219.ScanId;v=1;d1=17851.17851.3	controllerType=0 controllerNumber=1 scan=17851	39.6653
24905:3	1	S.MP[+15.995]LPPHPGHPGYINFS[+79.966]YEV.L		P[+16], S[+80]	750.009	3	2248.01	2247.99	0	8	17	Non	167.85	167.85	4	2.47	1304	>sp|P02817|AMELX_BOVIN Amelogenin, X isoform OS=Bos taurus OX=9913 GN=AMELX PE=1 SV=2	1	hf1_10472_ebo_24_1_261219.ScanId;v=1;d1=19046.19046.3	controllerType=0 controllerNumber=1 scan=19046	41.731
47176:3	1	S.MP[+15.995]LPPHPGHPGYINFS[+79.966]YEVL.T		P[+16], S[+80]	787.703	3	2361.09	2361.08	0	7	17	Non	172.24	172.24	5.5	1.46	1304	>sp|P02817|AMELX_BOVIN Amelogenin, X isoform OS=Bos taurus OX=9913 GN=AMELX PE=1 SV=2	1	hf1_10472_ebo_24_1_261219.ScanId;v=1;d1=34754.34754.4	controllerType=0 controllerNumber=1 scan=34754	73.5552
28404:3	1	S.MP[+15.995]LPPHPGHPGYINFS[+79.966]YEVL.T		P[+16], S[+80]	787.703	3	2361.09	2361.08	0	6.7	17	Non	225.18	225.18	4	2.6	1304	>sp|P02817|AMELX_BOVIN Amelogenin, X isoform OS=Bos taurus OX=9913 GN=AMELX PE=1 SV=2	1	hf1_10472_ebo_24_1_261219.ScanId;v=1;d1=21469.21469.3	controllerType=0 controllerNumber=1 scan=21469	45.9612
28711:3	1	S.MP[+15.995]LPPHPGHPGYINFS[+79.966]YEVL.T		P[+16], S[+80]	787.703	3	2361.1	2361.08	0	7.7	17	Non	240.07	240.07	4	2.8	1304	>sp|P02817|AMELX_BOVIN Amelogenin, X isoform OS=Bos taurus OX=9913 GN=AMELX PE=1 SV=2	1	hf1_10472_ebo_24_1_261219.ScanId;v=1;d1=21671.21671.3	controllerType=0 controllerNumber=1 scan=21671	46.3166
27829:3	1	S.MP[+15.995]LPPHPGHPGYINFS[+79.966]YEVL.T		P[+16], S[+80]	787.7	3	2361.09	2361.08	0	3.9	17	Non	248.93	248.93	5.8	2.99	1304	>sp|P02817|AMELX_BOVIN Amelogenin, X isoform OS=Bos taurus OX=9913 GN=AMELX PE=1 SV=2	1	hf1_10472_ebo_24_1_261219.ScanId;v=1;d1=21070.21070.3	controllerType=0 controllerNumber=1 scan=21070	45.2497
29013:3	1	S.MP[+15.995]LPPHPGHPGYINFS[+79.966]YEVL.T		P[+16], S[+80]	787.698	3	2361.08	2361.08	0	1.5	17	Non	286.93	286.93	4	3.21	1304	>sp|P02817|AMELX_BOVIN Amelogenin, X isoform OS=Bos taurus OX=9913 GN=AMELX PE=1 SV=2	1	hf1_10472_ebo_24_1_261219.ScanId;v=1;d1=21870.21870.3	controllerType=0 controllerNumber=1 scan=21870	46.6678
28109:3	1	S.MP[+15.995]LPPHPGHPGYINFS[+79.966]YEVL.T		P[+16], S[+80]	787.703	3	2361.09	2361.08	0	6.7	17	Non	301.3	301.3	4	4	1304	>sp|P02817|AMELX_BOVIN Amelogenin, X isoform OS=Bos taurus OX=9913 GN=AMELX PE=1 SV=2	1	hf1_10472_ebo_24_1_261219.ScanId;v=1;d1=21268.21268.3	controllerType=0 controllerNumber=1 scan=21268	45.6056
28596:2	1	S.M[+15.995]PLPPHPGHPGYINFS[+79.966]YEVL.T		M[+16], S[+80]	1181.05	2	2361.1	2361.08	0	8.5	17	Non	431.55	431.55	17.69	4.69	1304	>sp|P02817|AMELX_BOVIN Amelogenin, X isoform OS=Bos taurus OX=9913 GN=AMELX PE=1 SV=2	1	hf1_10472_ebo_24_1_261219.ScanId;v=1;d1=21595.21595.2	controllerType=0 controllerNumber=1 scan=21595	46.1837
28015:2	1	S.M[+15.995]PLPPHPGHPGYINFS[+79.966]YEVL.T		M[+16], S[+80]	1181.05	2	2361.1	2361.08	0	8.5	17	Non	489.89	489.89	20.24	5.22	1304	>sp|P02817|AMELX_BOVIN Amelogenin, X isoform OS=Bos taurus OX=9913 GN=AMELX PE=1 SV=2	1	hf1_10472_ebo_24_1_261219.ScanId;v=1;d1=21199.21199.2	controllerType=0 controllerNumber=1 scan=21199	45.481
28305:2	1	S.M[+15.995]PLPPHPGHPGYINFS[+79.966]YEVL.T		M[+16], S[+80]	1181.05	2	2361.09	2361.08	0	6.8	17	Non	492.25	492.25	17.45	5.37	1304	>sp|P02817|AMELX_BOVIN Amelogenin, X isoform OS=Bos taurus OX=9913 GN=AMELX PE=1 SV=2	1	hf1_10472_ebo_24_1_261219.ScanId;v=1;d1=21399.21399.2	controllerType=0 controllerNumber=1 scan=21399	45.8355
29317:3	1	S.MP[+15.995]LPPHPGHPGYIN[+0.984]FS[+79.966]YEVL.T		N[+1], P[+16], S[+80]	788.031	3	2362.08	2362.06	0	7.3	17	Non	153.88	153.88	4	1.29	1304	>sp|P02817|AMELX_BOVIN Amelogenin, X isoform OS=Bos taurus OX=9913 GN=AMELX PE=1 SV=2	1	hf1_10472_ebo_24_1_261219.ScanId;v=1;d1=22067.22067.3	controllerType=0 controllerNumber=1 scan=22067	47.0132
29014:3	1	S.MP[+15.995]LPPHPGHPGYIN[+0.984]FS[+79.966]YEVL.T		N[+1], P[+16], S[+80]	788.033	3	2362.08	2362.06	0	9.4	17	Non	207.8	207.8	4	2.2	1304	>sp|P02817|AMELX_BOVIN Amelogenin, X isoform OS=Bos taurus OX=9913 GN=AMELX PE=1 SV=2	1	hf1_10472_ebo_24_1_261219.ScanId;v=1;d1=21870.21870.3	controllerType=0 controllerNumber=1 scan=21870	46.6678
29036:2	1	S.MP[+15.995]LPPHPGHPGYIN[+0.984]FS[+79.966]YEVL.T		N[+1], P[+16], S[+80]	1181.54	2	2362.08	2362.06	0	7.7	17	Non	254.56	254.56	6.16	3.8	1304	>sp|P02817|AMELX_BOVIN Amelogenin, X isoform OS=Bos taurus OX=9913 GN=AMELX PE=1 SV=2	1	hf1_10472_ebo_24_1_261219.ScanId;v=1;d1=21883.21883.2	controllerType=0 controllerNumber=1 scan=21883	46.6902
26886:3	1	S.M[+15.995]PLPPHPGHPGYINFS[+79.966]YEVLT.P		M[+16], S[+80]	821.386	3	2462.14	2462.12	0	7	17	Non	171.78	171.78	6.43	2.26	1304	>sp|P02817|AMELX_BOVIN Amelogenin, X isoform OS=Bos taurus OX=9913 GN=AMELX PE=1 SV=2	1	hf1_10472_ebo_24_1_261219.ScanId;v=1;d1=20390.20390.3	controllerType=0 controllerNumber=1 scan=20390	44.0615
26505:3	1	S.M[+15.995]PLPPHPGHPGYINFSYEVLTP.L		M[+16]	827.082	3	2479.23	2479.21	0	8.6	17	Non	304.81	304.81	8.71	4.27	1304	>sp|P02817|AMELX_BOVIN Amelogenin, X isoform OS=Bos taurus OX=9913 GN=AMELX PE=1 SV=2	1	hf1_10472_ebo_24_1_261219.ScanId;v=1;d1=20130.20130.3	controllerType=0 controllerNumber=1 scan=20130	43.6048
26796:3	1	S.MP[+15.995]LPPHPGHPGYINFSYEVLTP.L		P[+16]	827.08	3	2479.23	2479.21	0	5.6	17	Non	406.24	406.24	4	5.42	1304	>sp|P02817|AMELX_BOVIN Amelogenin, X isoform OS=Bos taurus OX=9913 GN=AMELX PE=1 SV=2	1	hf1_10472_ebo_24_1_261219.ScanId;v=1;d1=20329.20329.3	controllerType=0 controllerNumber=1 scan=20329	43.9534
28249:2	1	S.MP[+15.995]LPPHPGHPGYINFS[+79.966]YEVLTP.L		P[+16], S[+80]	1280.1	2	2559.2	2559.18	0	8.7	17	Non	91.06	91.06	4	1.28	1304	>sp|P02817|AMELX_BOVIN Amelogenin, X isoform OS=Bos taurus OX=9913 GN=AMELX PE=1 SV=2	1	hf1_10472_ebo_24_1_261219.ScanId;v=1;d1=21360.21360.2	controllerType=0 controllerNumber=1 scan=21360	45.7633
29266:3	1	S.MP[+15.995]LPPHPGHPGYINFS[+79.966]YEVLTP.L		P[+16], S[+80]	853.731	3	2559.18	2559.18	0	-0.3	17	Non	172.27	172.27	4	2.21	1304	>sp|P02817|AMELX_BOVIN Amelogenin, X isoform OS=Bos taurus OX=9913 GN=AMELX PE=1 SV=2	1	hf1_10472_ebo_24_1_261219.ScanId;v=1;d1=22035.22035.3	controllerType=0 controllerNumber=1 scan=22035	46.9566
27890:2	1	S.MP[+15.995]LPPHPGHPGYINFS[+79.966]YEVLTP.L		P[+16], S[+80]	1280.1	2	2559.2	2559.18	0	8.9	17	Non	215.63	215.63	10.89	2.96	1304	>sp|P02817|AMELX_BOVIN Amelogenin, X isoform OS=Bos taurus OX=9913 GN=AMELX PE=1 SV=2	1	hf1_10472_ebo_24_1_261219.ScanId;v=1;d1=21109.21109.2	controllerType=0 controllerNumber=1 scan=21109	45.3186
27921:3	1	S.MP[+15.995]LPPHPGHPGYINFS[+79.966]YEVLTP.L		P[+16], S[+80]	853.736	3	2559.19	2559.18	0	6.5	17	Non	251.3	251.3	15.96	4.36	1304	>sp|P02817|AMELX_BOVIN Amelogenin, X isoform OS=Bos taurus OX=9913 GN=AMELX PE=1 SV=2	1	hf1_10472_ebo_24_1_261219.ScanId;v=1;d1=21136.21136.3	controllerType=0 controllerNumber=1 scan=21136	45.3694
28162:2	1	S.M[+15.995]PLPPHPGHPGYINFS[+79.966]YEVLTP.L		M[+16], S[+80]	1280.1	2	2559.2	2559.18	0	8.9	17	Non	286.31	286.31	5.11	4.39	1304	>sp|P02817|AMELX_BOVIN Amelogenin, X isoform OS=Bos taurus OX=9913 GN=AMELX PE=1 SV=2	1	hf1_10472_ebo_24_1_261219.ScanId;v=1;d1=21303.21303.2	controllerType=0 controllerNumber=1 scan=21303	45.6646
28132:3	1	S.MP[+15.995]LPPHPGHPGYINFS[+79.966]YEVLTP.L		P[+16], S[+80]	853.737	3	2559.2	2559.18	0	6.9	17	Non	298.43	298.43	4	4.69	1304	>sp|P02817|AMELX_BOVIN Amelogenin, X isoform OS=Bos taurus OX=9913 GN=AMELX PE=1 SV=2	1	hf1_10472_ebo_24_1_261219.ScanId;v=1;d1=21283.21283.3	controllerType=0 controllerNumber=1 scan=21283	45.6296
28966:3	1	S.MP[+15.995]LPPHPGHPGYINFS[+79.966]YEVLTP.L		P[+16], S[+80]	853.734	3	2559.19	2559.18	0	3.4	17	Non	310.26	310.26	15.26	4.2	1304	>sp|P02817|AMELX_BOVIN Amelogenin, X isoform OS=Bos taurus OX=9913 GN=AMELX PE=1 SV=2	1	hf1_10472_ebo_24_1_261219.ScanId;v=1;d1=21837.21837.3	controllerType=0 controllerNumber=1 scan=21837	46.6096
28967:3	1	S.MP[+15.995]LPPHPGHPGYIN[+0.984]FS[+79.966]YEVLTP.L		N[+1], P[+16], S[+80]	854.067	3	2560.19	2560.16	0	9.9	17	Non	289.32	289.32	3.24	4.12	1304	>sp|P02817|AMELX_BOVIN Amelogenin, X isoform OS=Bos taurus OX=9913 GN=AMELX PE=1 SV=2	1	hf1_10472_ebo_24_1_261219.ScanId;v=1;d1=21837.21837.3	controllerType=0 controllerNumber=1 scan=21837	46.6096
27383:4	1	S.MP[+15.995]LPPHPGHPGYINFSYEVLTPL.K		P[+16]	648.832	4	2592.31	2592.3	0	3.9	17	Non	241.68	241.68	4	3.24	1304	>sp|P02817|AMELX_BOVIN Amelogenin, X isoform OS=Bos taurus OX=9913 GN=AMELX PE=1 SV=2	1	hf1_10472_ebo_24_1_261219.ScanId;v=1;d1=20747.20747.4	controllerType=0 controllerNumber=1 scan=20747	44.6747
47185:3	1	S.MP[+15.995]LPPHPGHPGYINFSYEVLTPL.K		P[+16]	864.777	3	2592.31	2592.3	0	7.4	17	Non	289.43	289.43	4	4.85	1304	>sp|P02817|AMELX_BOVIN Amelogenin, X isoform OS=Bos taurus OX=9913 GN=AMELX PE=1 SV=2	1	hf1_10472_ebo_24_1_261219.ScanId;v=1;d1=34760.34760.3	controllerType=0 controllerNumber=1 scan=34760	73.5671
27102:4	1	S.MP[+15.995]LPPHPGHPGYINFSYEVLTPL.K		P[+16]	648.834	4	2592.31	2592.3	0	6.7	17	Non	294.21	294.21	4	4.18	1304	>sp|P02817|AMELX_BOVIN Amelogenin, X isoform OS=Bos taurus OX=9913 GN=AMELX PE=1 SV=2	1	hf1_10472_ebo_24_1_261219.ScanId;v=1;d1=20541.20541.4	controllerType=0 controllerNumber=1 scan=20541	44.3195
33359:2	1	S.MPLPPHPGHPGYINFS[+79.966]YEVLTPL.K		S[+80]	1328.65	2	2656.29	2656.27	0	8.6	17	Non	306.12	306.12	114.45	4.39	1304	>sp|P02817|AMELX_BOVIN Amelogenin, X isoform OS=Bos taurus OX=9913 GN=AMELX PE=1 SV=2	1	hf1_10472_ebo_24_1_261219.ScanId;v=1;d1=24741.24741.2	controllerType=0 controllerNumber=1 scan=24741	51.7668
33624:2	1	S.MPLPPHPGHPGYINFS[+79.966]YEVLTPL.K		S[+80]	1328.65	2	2656.29	2656.27	0	8.9	17	Non	325.68	325.68	128.25	4.52	1304	>sp|P02817|AMELX_BOVIN Amelogenin, X isoform OS=Bos taurus OX=9913 GN=AMELX PE=1 SV=2	1	hf1_10472_ebo_24_1_261219.ScanId;v=1;d1=24927.24927.2	controllerType=0 controllerNumber=1 scan=24927	52.1152
30457:3	1	S.MP[+15.995]LPPHPGHPGYINFSYEVLTPL.K		P[+16]	864.774	3	2592.31	2592.3	0	4.2	17	Non	491.68	491.68	4	5.89	1304	>sp|P02817|AMELX_BOVIN Amelogenin, X isoform OS=Bos taurus OX=9913 GN=AMELX PE=1 SV=2	1	hf1_10472_ebo_24_1_261219.ScanId;v=1;d1=22804.22804.3	controllerType=0 controllerNumber=1 scan=22804	48.3129
45099:3	1	S.MP[+15.995]LPPHPGHPGYINFS[+79.966]YEVLTPL.K		P[+16], S[+80]	891.429	3	2672.27	2672.26	0	4.1	17	Non	99.74	99.74	4	2.22	1304	>sp|P02817|AMELX_BOVIN Amelogenin, X isoform OS=Bos taurus OX=9913 GN=AMELX PE=1 SV=2	1	hf1_10472_ebo_24_1_261219.ScanId;v=1;d1=32625.32625.3	controllerType=0 controllerNumber=1 scan=32625	66.8025
44809:3	1	S.MP[+15.995]LPPHPGHPGYINFS[+79.966]YEVLTPL.K		P[+16], S[+80]	891.43	3	2672.28	2672.26	0	5	17	Non	130.23	130.23	4	2.35	1304	>sp|P02817|AMELX_BOVIN Amelogenin, X isoform OS=Bos taurus OX=9913 GN=AMELX PE=1 SV=2	1	hf1_10472_ebo_24_1_261219.ScanId;v=1;d1=32371.32371.3	controllerType=0 controllerNumber=1 scan=32371	66.1202
44950:3	1	S.MP[+15.995]LPPHPGHPGYINFS[+79.966]YEVLTPL.K		P[+16], S[+80]	891.43	3	2672.28	2672.26	0	5	17	Non	131.14	131.14	4	2.35	1304	>sp|P02817|AMELX_BOVIN Amelogenin, X isoform OS=Bos taurus OX=9913 GN=AMELX PE=1 SV=2	1	hf1_10472_ebo_24_1_261219.ScanId;v=1;d1=32495.32495.3	controllerType=0 controllerNumber=1 scan=32495	66.4594
44434:3	1	S.M[+15.995]PLPPHPGHPGYINFS[+79.966]YEVLTPL.K		M[+16], S[+80]	891.431	3	2672.28	2672.26	0	6.1	17	Non	132.17	132.17	1.9	2.27	1304	>sp|P02817|AMELX_BOVIN Amelogenin, X isoform OS=Bos taurus OX=9913 GN=AMELX PE=1 SV=2	1	hf1_10472_ebo_24_1_261219.ScanId;v=1;d1=32023.32023.3	controllerType=0 controllerNumber=1 scan=32023	65.0929
41393:3	1	S.MP[+15.995]LPPHPGHPGYINFS[+79.966]YEVLTPL.K		P[+16], S[+80]	891.432	3	2672.28	2672.26	0	6.7	17	Non	132.81	132.81	4	2.34	1304	>sp|P02817|AMELX_BOVIN Amelogenin, X isoform OS=Bos taurus OX=9913 GN=AMELX PE=1 SV=2	1	hf1_10472_ebo_24_1_261219.ScanId;v=1;d1=29993.29993.3	controllerType=0 controllerNumber=1 scan=29993	61.2513
44539:3	1	S.MP[+15.995]LPPHPGHPGYINFS[+79.966]YEVLTPL.K		P[+16], S[+80]	891.43	3	2672.28	2672.26	0	5.5	17	Non	141.49	141.49	4	2.35	1304	>sp|P02817|AMELX_BOVIN Amelogenin, X isoform OS=Bos taurus OX=9913 GN=AMELX PE=1 SV=2	1	hf1_10472_ebo_24_1_261219.ScanId;v=1;d1=32125.32125.3	controllerType=0 controllerNumber=1 scan=32125	65.4299
38698:3	1	S.MP[+15.995]LPPHPGHPGYINFS[+79.966]YEVLTPL.K		P[+16], S[+80]	891.431	3	2672.28	2672.26	0	5.9	17	Non	147.72	147.72	0.3	2.19	1304	>sp|P02817|AMELX_BOVIN Amelogenin, X isoform OS=Bos taurus OX=9913 GN=AMELX PE=1 SV=2	1	hf1_10472_ebo_24_1_261219.ScanId;v=1;d1=28238.28238.3	controllerType=0 controllerNumber=1 scan=28238	58.1045
41688:3	1	S.MP[+15.995]LPPHPGHPGYINFS[+79.966]YEVLTPL.K		P[+16], S[+80]	891.432	3	2672.28	2672.26	0	7.2	17	Non	150.02	150.02	4	2.45	1304	>sp|P02817|AMELX_BOVIN Amelogenin, X isoform OS=Bos taurus OX=9913 GN=AMELX PE=1 SV=2	1	hf1_10472_ebo_24_1_261219.ScanId;v=1;d1=30182.30182.3	controllerType=0 controllerNumber=1 scan=30182	61.5986
37300:3	1	S.MP[+15.995]LPPHPGHPGYINFS[+79.966]YEVLTPL.K		P[+16], S[+80]	891.43	3	2672.28	2672.26	0	5.6	17	Non	153.64	153.64	4	2.19	1304	>sp|P02817|AMELX_BOVIN Amelogenin, X isoform OS=Bos taurus OX=9913 GN=AMELX PE=1 SV=2	1	hf1_10472_ebo_24_1_261219.ScanId;v=1;d1=27347.27347.3	controllerType=0 controllerNumber=1 scan=27347	56.4966
40485:3	1	S.MP[+15.995]LPPHPGHPGYINFS[+79.966]YEVLTPL.K		P[+16], S[+80]	891.431	3	2672.28	2672.26	0	6.4	17	Non	160.45	160.45	4	2.96	1304	>sp|P02817|AMELX_BOVIN Amelogenin, X isoform OS=Bos taurus OX=9913 GN=AMELX PE=1 SV=2	1	hf1_10472_ebo_24_1_261219.ScanId;v=1;d1=29401.29401.3	controllerType=0 controllerNumber=1 scan=29401	60.1921
42568:3	1	S.MP[+15.995]LPPHPGHPGYINFS[+79.966]YEVLTPL.K		P[+16], S[+80]	891.432	3	2672.28	2672.26	0	7.2	17	Non	164.75	164.75	4	3.19	1304	>sp|P02817|AMELX_BOVIN Amelogenin, X isoform OS=Bos taurus OX=9913 GN=AMELX PE=1 SV=2	1	hf1_10472_ebo_24_1_261219.ScanId;v=1;d1=30758.30758.3	controllerType=0 controllerNumber=1 scan=30758	62.6439
31592:3	1	S.MP[+15.995]LPPHPGHPGYINFS[+79.966]YEVLTPL.K		P[+16], S[+80]	891.43	3	2672.27	2672.26	0	4.8	17	Non	168.37	168.37	4	2.2	1304	>sp|P02817|AMELX_BOVIN Amelogenin, X isoform OS=Bos taurus OX=9913 GN=AMELX PE=1 SV=2	1	hf1_10472_ebo_24_1_261219.ScanId;v=1;d1=23546.23546.3	controllerType=0 controllerNumber=1 scan=23546	49.6227
47157:2	1	S.MP[+15.995]LPPHPGHPGYINFS[+79.966]YEVLTPL.K		P[+16], S[+80]	1336.65	2	2672.29	2672.26	0	9.3	17	Non	174.14	174.14	4	2.96	1304	>sp|P02817|AMELX_BOVIN Amelogenin, X isoform OS=Bos taurus OX=9913 GN=AMELX PE=1 SV=2	1	hf1_10472_ebo_24_1_261219.ScanId;v=1;d1=34738.34738.2	controllerType=0 controllerNumber=1 scan=34738	73.5294
35682:3	1	S.MP[+15.995]LPPHPGHPGYINFS[+79.966]YEVLTPL.K		P[+16], S[+80]	891.431	3	2672.28	2672.26	0	5.7	17	Non	177.51	177.51	4	2.41	1304	>sp|P02817|AMELX_BOVIN Amelogenin, X isoform OS=Bos taurus OX=9913 GN=AMELX PE=1 SV=2	1	hf1_10472_ebo_24_1_261219.ScanId;v=1;d1=26299.26299.4	controllerType=0 controllerNumber=1 scan=26299	54.6122
36719:3	1	S.MP[+15.995]LPPHPGHPGYINFS[+79.966]YEVLTPL.K		P[+16], S[+80]	891.43	3	2672.27	2672.26	0	4.7	17	Non	177.88	177.88	4	2.41	1304	>sp|P02817|AMELX_BOVIN Amelogenin, X isoform OS=Bos taurus OX=9913 GN=AMELX PE=1 SV=2	1	hf1_10472_ebo_24_1_261219.ScanId;v=1;d1=26966.26966.3	controllerType=0 controllerNumber=1 scan=26966	55.8075
38065:3	1	S.MP[+15.995]LPPHPGHPGYINFS[+79.966]YEVLTPL.K		P[+16], S[+80]	891.43	3	2672.28	2672.26	0	5.2	17	Non	178.86	178.86	4	2.41	1304	>sp|P02817|AMELX_BOVIN Amelogenin, X isoform OS=Bos taurus OX=9913 GN=AMELX PE=1 SV=2	1	hf1_10472_ebo_24_1_261219.ScanId;v=1;d1=27831.27831.3	controllerType=0 controllerNumber=1 scan=27831	57.3667
34811:3	1	S.MP[+15.995]LPPHPGHPGYINFS[+79.966]YEVLTPL.K		P[+16], S[+80]	891.431	3	2672.28	2672.26	0	6.1	17	Non	179.86	179.86	4	2.41	1304	>sp|P02817|AMELX_BOVIN Amelogenin, X isoform OS=Bos taurus OX=9913 GN=AMELX PE=1 SV=2	1	hf1_10472_ebo_24_1_261219.ScanId;v=1;d1=25715.25715.4	controllerType=0 controllerNumber=1 scan=25715	53.538
39868:3	1	S.MP[+15.995]LPPHPGHPGYINFS[+79.966]YEVLTPL.K		P[+16], S[+80]	891.431	3	2672.28	2672.26	0	6.1	17	Non	191.65	191.65	4	2.98	1304	>sp|P02817|AMELX_BOVIN Amelogenin, X isoform OS=Bos taurus OX=9913 GN=AMELX PE=1 SV=2	1	hf1_10472_ebo_24_1_261219.ScanId;v=1;d1=29005.29005.3	controllerType=0 controllerNumber=1 scan=29005	59.4856
32045:4	1	S.MP[+15.995]LPPHPGHPGYINFS[+79.966]YEVLTPL.K		P[+16], S[+80]	668.824	4	2672.27	2672.26	0	4.5	17	Non	195.38	195.38	4	2.38	1304	>sp|P02817|AMELX_BOVIN Amelogenin, X isoform OS=Bos taurus OX=9913 GN=AMELX PE=1 SV=2	1	hf1_10472_ebo_24_1_261219.ScanId;v=1;d1=23852.23852.4	controllerType=0 controllerNumber=1 scan=23852	50.1731
42262:3	1	S.MP[+15.995]LPPHPGHPGYINFS[+79.966]YEVLTPL.K		P[+16], S[+80]	891.43	3	2672.28	2672.26	0	5.3	17	Non	196.53	196.53	4	3.12	1304	>sp|P02817|AMELX_BOVIN Amelogenin, X isoform OS=Bos taurus OX=9913 GN=AMELX PE=1 SV=2	1	hf1_10472_ebo_24_1_261219.ScanId;v=1;d1=30564.30564.3	controllerType=0 controllerNumber=1 scan=30564	62.2931
43998:3	1	S.MP[+15.995]LPPHPGHPGYINFS[+79.966]YEVLTPL.K		P[+16], S[+80]	891.432	3	2672.28	2672.26	0	7	17	Non	199.41	199.41	4	3.19	1304	>sp|P02817|AMELX_BOVIN Amelogenin, X isoform OS=Bos taurus OX=9913 GN=AMELX PE=1 SV=2	1	hf1_10472_ebo_24_1_261219.ScanId;v=1;d1=31692.31692.3	controllerType=0 controllerNumber=1 scan=31692	64.3929
44660:3	1	S.MP[+15.995]LPPHPGHPGYINFS[+79.966]YEVLTPL.K		P[+16], S[+80]	891.429	3	2672.27	2672.26	0	4.6	17	Non	202.89	202.89	4	3.17	1304	>sp|P02817|AMELX_BOVIN Amelogenin, X isoform OS=Bos taurus OX=9913 GN=AMELX PE=1 SV=2	1	hf1_10472_ebo_24_1_261219.ScanId;v=1;d1=32242.32242.3	controllerType=0 controllerNumber=1 scan=32242	65.7791
42852:3	1	S.MP[+15.995]LPPHPGHPGYINFS[+79.966]YEVLTPL.K		P[+16], S[+80]	891.431	3	2672.28	2672.26	0	6.4	17	Non	205.72	205.72	4	3.53	1304	>sp|P02817|AMELX_BOVIN Amelogenin, X isoform OS=Bos taurus OX=9913 GN=AMELX PE=1 SV=2	1	hf1_10472_ebo_24_1_261219.ScanId;v=1;d1=30949.30949.3	controllerType=0 controllerNumber=1 scan=30949	62.996
44237:3	1	S.MP[+15.995]LPPHPGHPGYINFS[+79.966]YEVLTPL.K		P[+16], S[+80]	891.431	3	2672.28	2672.26	0	5.7	17	Non	210.57	210.57	4	3.16	1304	>sp|P02817|AMELX_BOVIN Amelogenin, X isoform OS=Bos taurus OX=9913 GN=AMELX PE=1 SV=2	1	hf1_10472_ebo_24_1_261219.ScanId;v=1;d1=31870.31870.3	controllerType=0 controllerNumber=1 scan=31870	64.7456
31728:3	1	S.MP[+15.995]LPPHPGHPGYINFS[+79.966]YEVLTPL.K		P[+16], S[+80]	891.43	3	2672.27	2672.26	0	4.8	17	Non	210.92	210.92	4	3.16	1304	>sp|P02817|AMELX_BOVIN Amelogenin, X isoform OS=Bos taurus OX=9913 GN=AMELX PE=1 SV=2	1	hf1_10472_ebo_24_1_261219.ScanId;v=1;d1=23635.23635.3	controllerType=0 controllerNumber=1 scan=23635	49.7841
41092:3	1	S.MP[+15.995]LPPHPGHPGYINFS[+79.966]YEVLTPL.K		P[+16], S[+80]	891.43	3	2672.28	2672.26	0	5.3	17	Non	214.36	214.36	4	3.31	1304	>sp|P02817|AMELX_BOVIN Amelogenin, X isoform OS=Bos taurus OX=9913 GN=AMELX PE=1 SV=2	1	hf1_10472_ebo_24_1_261219.ScanId;v=1;d1=29797.29797.3	controllerType=0 controllerNumber=1 scan=29797	60.8996
41979:3	1	S.MP[+15.995]LPPHPGHPGYINFS[+79.966]YEVLTPL.K		P[+16], S[+80]	891.429	3	2672.27	2672.26	0	3.8	17	Non	217.67	217.67	4	2.94	1304	>sp|P02817|AMELX_BOVIN Amelogenin, X isoform OS=Bos taurus OX=9913 GN=AMELX PE=1 SV=2	1	hf1_10472_ebo_24_1_261219.ScanId;v=1;d1=30374.30374.3	controllerType=0 controllerNumber=1 scan=30374	61.9467
35486:3	1	S.MP[+15.995]LPPHPGHPGYINFS[+79.966]YEVLTPL.K		P[+16], S[+80]	891.432	3	2672.28	2672.26	0	6.8	17	Non	225.87	225.87	4	3.14	1304	>sp|P02817|AMELX_BOVIN Amelogenin, X isoform OS=Bos taurus OX=9913 GN=AMELX PE=1 SV=2	1	hf1_10472_ebo_24_1_261219.ScanId;v=1;d1=26169.26169.4	controllerType=0 controllerNumber=1 scan=26169	54.3813
43124:3	1	S.MP[+15.995]LPPHPGHPGYINFS[+79.966]YEVLTPL.K		P[+16], S[+80]	891.433	3	2672.28	2672.26	0	8	17	Non	229.76	229.76	4	3.38	1304	>sp|P02817|AMELX_BOVIN Amelogenin, X isoform OS=Bos taurus OX=9913 GN=AMELX PE=1 SV=2	1	hf1_10472_ebo_24_1_261219.ScanId;v=1;d1=31127.31127.3	controllerType=0 controllerNumber=1 scan=31127	63.346
31463:4	1	S.MP[+15.995]LPPHPGHPGYINFS[+79.966]YEVLTPL.K		P[+16], S[+80]	668.824	4	2672.28	2672.26	0	5	17	Non	231.4	231.4	4	2.62	1304	>sp|P02817|AMELX_BOVIN Amelogenin, X isoform OS=Bos taurus OX=9913 GN=AMELX PE=1 SV=2	1	hf1_10472_ebo_24_1_261219.ScanId;v=1;d1=23459.23459.4	controllerType=0 controllerNumber=1 scan=23459	49.471
37840:3	1	S.MP[+15.995]LPPHPGHPGYINFS[+79.966]YEVLTPL.K		P[+16], S[+80]	891.429	3	2672.27	2672.26	0	4	17	Non	238.35	238.35	4	2.74	1304	>sp|P02817|AMELX_BOVIN Amelogenin, X isoform OS=Bos taurus OX=9913 GN=AMELX PE=1 SV=2	1	hf1_10472_ebo_24_1_261219.ScanId;v=1;d1=27689.27689.6	controllerType=0 controllerNumber=1 scan=27689	57.1142
34878:3	1	S.MP[+15.995]LPPHPGHPGYINFS[+79.966]YEVLTPL.K		P[+16], S[+80]	891.43	3	2672.28	2672.26	0	5.3	17	Non	238.6	238.6	4	2.94	1304	>sp|P02817|AMELX_BOVIN Amelogenin, X isoform OS=Bos taurus OX=9913 GN=AMELX PE=1 SV=2	1	hf1_10472_ebo_24_1_261219.ScanId;v=1;d1=25762.25762.3	controllerType=0 controllerNumber=1 scan=25762	53.6233
43710:3	1	S.MP[+15.995]LPPHPGHPGYINFS[+79.966]YEVLTPL.K		P[+16], S[+80]	891.431	3	2672.28	2672.26	0	5.8	17	Non	242.73	242.73	4	4.13	1304	>sp|P02817|AMELX_BOVIN Amelogenin, X isoform OS=Bos taurus OX=9913 GN=AMELX PE=1 SV=2	1	hf1_10472_ebo_24_1_261219.ScanId;v=1;d1=31505.31505.3	controllerType=0 controllerNumber=1 scan=31505	64.0522
43399:3	1	S.MP[+15.995]LPPHPGHPGYINFS[+79.966]YEVLTPL.K		P[+16], S[+80]	891.432	3	2672.28	2672.26	0	7.1	17	Non	244.91	244.91	4	4.36	1304	>sp|P02817|AMELX_BOVIN Amelogenin, X isoform OS=Bos taurus OX=9913 GN=AMELX PE=1 SV=2	1	hf1_10472_ebo_24_1_261219.ScanId;v=1;d1=31306.31306.3	controllerType=0 controllerNumber=1 scan=31306	63.6948
34456:3	1	S.MP[+15.995]LPPHPGHPGYINFS[+79.966]YEVLTPL.K		P[+16], S[+80]	891.431	3	2672.28	2672.26	0	5.9	17	Non	245.73	245.73	4	3.87	1304	>sp|P02817|AMELX_BOVIN Amelogenin, X isoform OS=Bos taurus OX=9913 GN=AMELX PE=1 SV=2	1	hf1_10472_ebo_24_1_261219.ScanId;v=1;d1=25475.25475.4	controllerType=0 controllerNumber=1 scan=25475	53.0944
31753:4	1	S.MP[+15.995]LPPHPGHPGYINFS[+79.966]YEVLTPL.K		P[+16], S[+80]	668.824	4	2672.27	2672.26	0	4.4	17	Non	252.15	252.15	4	3.23	1304	>sp|P02817|AMELX_BOVIN Amelogenin, X isoform OS=Bos taurus OX=9913 GN=AMELX PE=1 SV=2	1	hf1_10472_ebo_24_1_261219.ScanId;v=1;d1=23652.23652.4	controllerType=0 controllerNumber=1 scan=23652	49.8153
34512:3	1	S.MP[+15.995]LPPHPGHPGYINFS[+79.966]YEVLTPL.K		P[+16], S[+80]	891.43	3	2672.28	2672.26	0	5.6	17	Non	254.46	254.46	4	3.87	1304	>sp|P02817|AMELX_BOVIN Amelogenin, X isoform OS=Bos taurus OX=9913 GN=AMELX PE=1 SV=2	1	hf1_10472_ebo_24_1_261219.ScanId;v=1;d1=25513.25513.3	controllerType=0 controllerNumber=1 scan=25513	53.1653
33439:3	1	S.MP[+15.995]LPPHPGHPGYINFS[+79.966]YEVLTPL.K		P[+16], S[+80]	891.429	3	2672.27	2672.26	0	4	17	Non	258.63	258.63	4	3.63	1304	>sp|P02817|AMELX_BOVIN Amelogenin, X isoform OS=Bos taurus OX=9913 GN=AMELX PE=1 SV=2	1	hf1_10472_ebo_24_1_261219.ScanId;v=1;d1=24800.24800.3	controllerType=0 controllerNumber=1 scan=24800	51.8769
31137:3	1	S.MP[+15.995]LPPHPGHPGYINFS[+79.966]YEVLTPL.K		P[+16], S[+80]	891.431	3	2672.28	2672.26	0	5.9	17	Non	263.86	263.86	4	3.87	1304	>sp|P02817|AMELX_BOVIN Amelogenin, X isoform OS=Bos taurus OX=9913 GN=AMELX PE=1 SV=2	1	hf1_10472_ebo_24_1_261219.ScanId;v=1;d1=23249.23249.3	controllerType=0 controllerNumber=1 scan=23249	49.1048
35204:3	1	S.M[+15.995]PLPPHPGHPGYINFS[+79.966]YEVLTPL.K		M[+16], S[+80]	891.431	3	2672.28	2672.26	0	5.9	17	Non	264.86	264.86	3.24	4.13	1304	>sp|P02817|AMELX_BOVIN Amelogenin, X isoform OS=Bos taurus OX=9913 GN=AMELX PE=1 SV=2	1	hf1_10472_ebo_24_1_261219.ScanId;v=1;d1=25981.25981.3	controllerType=0 controllerNumber=1 scan=25981	54.0327
47213:3	1	S.MP[+15.995]LPPHPGHPGYINFS[+79.966]YEVLTPL.K		P[+16], S[+80]	891.432	3	2672.28	2672.26	0	7.8	17	Non	267.33	267.33	4	4.36	1304	>sp|P02817|AMELX_BOVIN Amelogenin, X isoform OS=Bos taurus OX=9913 GN=AMELX PE=1 SV=2	1	hf1_10472_ebo_24_1_261219.ScanId;v=1;d1=34782.34782.3	controllerType=0 controllerNumber=1 scan=34782	73.6059
40177:3	1	S.MP[+15.995]LPPHPGHPGYINFS[+79.966]YEVLTPL.K		P[+16], S[+80]	891.431	3	2672.28	2672.26	0	5.8	17	Non	267.94	267.94	4	4.28	1304	>sp|P02817|AMELX_BOVIN Amelogenin, X isoform OS=Bos taurus OX=9913 GN=AMELX PE=1 SV=2	1	hf1_10472_ebo_24_1_261219.ScanId;v=1;d1=29203.29203.3	controllerType=0 controllerNumber=1 scan=29203	59.8389
34205:3	1	S.MP[+15.995]LPPHPGHPGYINFS[+79.966]YEVLTPL.K		P[+16], S[+80]	891.43	3	2672.27	2672.26	0	4.6	17	Non	281.19	281.19	4	4.2	1304	>sp|P02817|AMELX_BOVIN Amelogenin, X isoform OS=Bos taurus OX=9913 GN=AMELX PE=1 SV=2	1	hf1_10472_ebo_24_1_261219.ScanId;v=1;d1=25307.25307.3	controllerType=0 controllerNumber=1 scan=25307	52.7974
32317:3	1	S.MP[+15.995]LPPHPGHPGYINFS[+79.966]YEVLTPL.K		P[+16], S[+80]	891.428	3	2672.27	2672.26	0	2.7	17	Non	287.11	287.11	4	4.2	1304	>sp|P02817|AMELX_BOVIN Amelogenin, X isoform OS=Bos taurus OX=9913 GN=AMELX PE=1 SV=2	1	hf1_10472_ebo_24_1_261219.ScanId;v=1;d1=24028.24028.3	controllerType=0 controllerNumber=1 scan=24028	50.49
32016:3	1	S.M[+15.995]PLPPHPGHPGYINFS[+79.966]YEVLTPL.K		M[+16], S[+80]	891.429	3	2672.27	2672.26	0	4.2	17	Non	292.46	292.46	0.92	4.61	1304	>sp|P02817|AMELX_BOVIN Amelogenin, X isoform OS=Bos taurus OX=9913 GN=AMELX PE=1 SV=2	1	hf1_10472_ebo_24_1_261219.ScanId;v=1;d1=23830.23830.3	controllerType=0 controllerNumber=1 scan=23830	50.1344
33177:3	1	S.M[+15.995]PLPPHPGHPGYINFS[+79.966]YEVLTPL.K		M[+16], S[+80]	891.429	3	2672.27	2672.26	0	3.9	17	Non	299.65	299.65	1.2	4.2	1304	>sp|P02817|AMELX_BOVIN Amelogenin, X isoform OS=Bos taurus OX=9913 GN=AMELX PE=1 SV=2	1	hf1_10472_ebo_24_1_261219.ScanId;v=1;d1=24613.24613.3	controllerType=0 controllerNumber=1 scan=24613	51.5357
33732:3	1	S.MP[+15.995]LPPHPGHPGYINFS[+79.966]YEVLTPL.K		P[+16], S[+80]	891.43	3	2672.28	2672.26	0	5.6	17	Non	303.08	303.08	4	4.46	1304	>sp|P02817|AMELX_BOVIN Amelogenin, X isoform OS=Bos taurus OX=9913 GN=AMELX PE=1 SV=2	1	hf1_10472_ebo_24_1_261219.ScanId;v=1;d1=24997.24997.3	controllerType=0 controllerNumber=1 scan=24997	52.2377
31438:3	1	S.MP[+15.995]LPPHPGHPGYINFS[+79.966]YEVLTPL.K		P[+16], S[+80]	891.43	3	2672.28	2672.26	0	5	17	Non	314.64	314.64	4	4.46	1304	>sp|P02817|AMELX_BOVIN Amelogenin, X isoform OS=Bos taurus OX=9913 GN=AMELX PE=1 SV=2	1	hf1_10472_ebo_24_1_261219.ScanId;v=1;d1=23443.23443.3	controllerType=0 controllerNumber=1 scan=23443	49.4442
31448:2	1	S.M[+15.995]PLPPHPGHPGYINFS[+79.966]YEVLTPL.K		M[+16], S[+80]	1336.65	2	2672.28	2672.26	0	8.3	17	Non	394.7	394.7	7.69	5.43	1304	>sp|P02817|AMELX_BOVIN Amelogenin, X isoform OS=Bos taurus OX=9913 GN=AMELX PE=1 SV=2	1	hf1_10472_ebo_24_1_261219.ScanId;v=1;d1=23449.23449.2	controllerType=0 controllerNumber=1 scan=23449	49.4531
31734:2	1	S.M[+15.995]PLPPHPGHPGYINFS[+79.966]YEVLTPL.K		M[+16], S[+80]	1336.64	2	2672.28	2672.26	0	5.8	17	Non	412.45	412.45	12.52	5.54	1304	>sp|P02817|AMELX_BOVIN Amelogenin, X isoform OS=Bos taurus OX=9913 GN=AMELX PE=1 SV=2	1	hf1_10472_ebo_24_1_261219.ScanId;v=1;d1=23640.23640.2	controllerType=0 controllerNumber=1 scan=23640	49.7945
32018:2	1	S.M[+15.995]PLPPHPGHPGYINFS[+79.966]YEVLTPL.K		M[+16], S[+80]	1336.64	2	2672.28	2672.26	0	6.2	17	Non	466.43	466.43	19.4	6.16	1304	>sp|P02817|AMELX_BOVIN Amelogenin, X isoform OS=Bos taurus OX=9913 GN=AMELX PE=1 SV=2	1	hf1_10472_ebo_24_1_261219.ScanId;v=1;d1=23832.23832.2	controllerType=0 controllerNumber=1 scan=23832	50.1375
44246:3	1	S.MP[+15.995]LPPHPGHP[+31.990]GY[+31.990]INFSYEVLTPL.K		P[+16][+32], Y[+32]	886.1	3	2656.29	2656.28	0	4.1	17	Non	33.41	33.41	0.24	1.32	1304	>sp|P02817|AMELX_BOVIN Amelogenin, X isoform OS=Bos taurus OX=9913 GN=AMELX PE=1 SV=2	1	hf1_10472_ebo_24_1_261219.ScanId;v=1;d1=31879.31879.3	controllerType=0 controllerNumber=1 scan=31879	64.7652
31778:3	1	S.MP[+15.995]LPPHPGHPGYINFS[+79.966]Y[+15.995]EVLTPL.K		P[+16], S[+80], Y[+16]	896.758	3	2688.26	2688.26	0	0.9	17	Non	206.96	206.96	4	2.28	1304	>sp|P02817|AMELX_BOVIN Amelogenin, X isoform OS=Bos taurus OX=9913 GN=AMELX PE=1 SV=2	1	hf1_10472_ebo_24_1_261219.ScanId;v=1;d1=23669.23669.3	controllerType=0 controllerNumber=1 scan=23669	49.8456
34864:3	1	S.M[+15.995]PLPPHPGHPGY[+31.990]INF[+31.990]SYEVLTPL.K		F[+32], M[+16], Y[+32]	886.096	3	2656.27	2656.28	0	-0.1	17	Non	218.43	218.43	0.69	2.25	1304	>sp|P02817|AMELX_BOVIN Amelogenin, X isoform OS=Bos taurus OX=9913 GN=AMELX PE=1 SV=2	1	hf1_10472_ebo_24_1_261219.ScanId;v=1;d1=25752.25752.3	controllerType=0 controllerNumber=1 scan=25752	53.6053
33902:3	1	S.MP[+15.995]LPPHPGHPGYINF[+31.990]SY[+31.990]EVLTPL.K		F[+32], P[+16], Y[+32]	886.098	3	2656.28	2656.28	0	2.1	17	Non	253.22	253.22	5.8	2.8	1304	>sp|P02817|AMELX_BOVIN Amelogenin, X isoform OS=Bos taurus OX=9913 GN=AMELX PE=1 SV=2	1	hf1_10472_ebo_24_1_261219.ScanId;v=1;d1=25104.25104.4	controllerType=0 controllerNumber=1 scan=25104	52.428
31139:2	1	S.MP[+15.995]LPPHPGHPGY[+15.995]INFS[+79.966]YEVLTPL.K		P[+16], S[+80], Y[+16]	1344.65	2	2688.28	2688.26	0	9.7	17	Non	255.11	255.11	2	3.9	1304	>sp|P02817|AMELX_BOVIN Amelogenin, X isoform OS=Bos taurus OX=9913 GN=AMELX PE=1 SV=2	1	hf1_10472_ebo_24_1_261219.ScanId;v=1;d1=23250.23250.2	controllerType=0 controllerNumber=1 scan=23250	49.1063
35164:3	1	S.M[+15.995]PLPPHPGHPGYINF[+31.990]SY[+31.990]EVLTPL.K		F[+32], M[+16], Y[+32]	886.1	3	2656.28	2656.28	0	3.4	17	Non	260.4	260.4	4.31	3.09	1304	>sp|P02817|AMELX_BOVIN Amelogenin, X isoform OS=Bos taurus OX=9913 GN=AMELX PE=1 SV=2	1	hf1_10472_ebo_24_1_261219.ScanId;v=1;d1=25955.25955.6	controllerType=0 controllerNumber=1 scan=25955	53.9822
32903:2	1	S.MP[+15.995]LPPHPGHPGYIN[+0.984]FS[+79.966]YEVLTPL.K		N[+1], P[+16], S[+80]	1337.14	2	2673.27	2673.25	0	8	17	Non	263.84	263.84	4	4.63	1304	>sp|P02817|AMELX_BOVIN Amelogenin, X isoform OS=Bos taurus OX=9913 GN=AMELX PE=1 SV=2	1	hf1_10472_ebo_24_1_261219.ScanId;v=1;d1=24426.24426.2	controllerType=0 controllerNumber=1 scan=24426	51.1964
33304:3	1	S.MP[+15.995]LPPHPGHPGYINF[+31.990]SY[+31.990]EVLTPL.K		F[+32], P[+16], Y[+32]	886.098	3	2656.28	2656.28	0	1.8	17	Non	275.33	275.33	5.31	3.31	1304	>sp|P02817|AMELX_BOVIN Amelogenin, X isoform OS=Bos taurus OX=9913 GN=AMELX PE=1 SV=2	1	hf1_10472_ebo_24_1_261219.ScanId;v=1;d1=24707.24707.6	controllerType=0 controllerNumber=1 scan=24707	51.7079
32897:3	1	S.MP[+15.995]LPPHPGHPGYIN[+0.984]FS[+79.966]YEVLTPL.K		N[+1], P[+16], S[+80]	891.759	3	2673.26	2673.25	0	6.1	17	Non	282.1	282.1	4	4.46	1304	>sp|P02817|AMELX_BOVIN Amelogenin, X isoform OS=Bos taurus OX=9913 GN=AMELX PE=1 SV=2	1	hf1_10472_ebo_24_1_261219.ScanId;v=1;d1=24422.24422.3	controllerType=0 controllerNumber=1 scan=24422	51.1903
31488:3	1	S.MP[+15.995]LPPHPGHPGY[+15.995]INFS[+79.966]YEVLTPL.K		P[+16], S[+80], Y[+16]	896.76	3	2688.26	2688.26	0	2.9	17	Non	283.74	283.74	2.53	3.95	1304	>sp|P02817|AMELX_BOVIN Amelogenin, X isoform OS=Bos taurus OX=9913 GN=AMELX PE=1 SV=2	1	hf1_10472_ebo_24_1_261219.ScanId;v=1;d1=23477.23477.3	controllerType=0 controllerNumber=1 scan=23477	49.5032
33336:3	1	S.MP[+15.995]LPPHPGHPGYINF[+31.990]SY[+31.990]EVLTPL.K		F[+32], P[+16], Y[+32]	886.099	3	2656.28	2656.28	0	2.3	17	Non	304.18	304.18	5.8	4.2	1304	>sp|P02817|AMELX_BOVIN Amelogenin, X isoform OS=Bos taurus OX=9913 GN=AMELX PE=1 SV=2	1	hf1_10472_ebo_24_1_261219.ScanId;v=1;d1=24728.24728.4	controllerType=0 controllerNumber=1 scan=24728	51.7444
32318:3	1	S.MP[+15.995]LPPHPGHPGYIN[+0.984]FS[+79.966]YEVLTPL.K		N[+1], P[+16], S[+80]	891.761	3	2673.27	2673.25	0	8.4	17	Non	307.77	300.7	4	4.12	1304	>sp|P02817|AMELX_BOVIN Amelogenin, X isoform OS=Bos taurus OX=9913 GN=AMELX PE=1 SV=2	1	hf1_10472_ebo_24_1_261219.ScanId;v=1;d1=24028.24028.3	controllerType=0 controllerNumber=1 scan=24028	50.49
32625:3	1	S.MP[+15.995]LPPHPGHPGYIN[+0.984]FS[+79.966]YEVLTPL.K		N[+1], P[+16], S[+80]	891.759	3	2673.26	2673.25	0	5.9	17	Non	314.63	314.63	4	4.46	1304	>sp|P02817|AMELX_BOVIN Amelogenin, X isoform OS=Bos taurus OX=9913 GN=AMELX PE=1 SV=2	1	hf1_10472_ebo_24_1_261219.ScanId;v=1;d1=24227.24227.3	controllerType=0 controllerNumber=1 scan=24227	50.8409
31179:3	1	S.MP[+15.995]LPPHPGHP[+15.995]GYINFS[+79.966]YEVLTPL.K		P[+16]*2, S[+80]	896.762	3	2688.27	2688.26	0	5.2	17	Non	322.07	322.07	0	4.74	1304	>sp|P02817|AMELX_BOVIN Amelogenin, X isoform OS=Bos taurus OX=9913 GN=AMELX PE=1 SV=2	1	hf1_10472_ebo_24_1_261219.ScanId;v=1;d1=23278.23278.3	controllerType=0 controllerNumber=1 scan=23278	49.156
32632:2	1	S.M[+15.995]PLPPHPGHPGYIN[+0.984]FS[+79.966]YEVLTPL.K		M[+16], N[+1], S[+80]	1337.14	2	2673.27	2673.25	0	8	17	Non	364.71	296.4	7.7	4.87	1304	>sp|P02817|AMELX_BOVIN Amelogenin, X isoform OS=Bos taurus OX=9913 GN=AMELX PE=1 SV=2	1	hf1_10472_ebo_24_1_261219.ScanId;v=1;d1=24232.24232.2	controllerType=0 controllerNumber=1 scan=24232	50.8478
45609:3	1	S.MP[+15.995]LPPHPGHP[+31.990]GY[+31.990]INFSY[+15.995]EVLTPL.K		P[+16][+32], Y[+16][+32]	891.429	3	2672.27	2672.27	0	0.9	17	Non	11.56	11.56	0	1.27	1304	>sp|P02817|AMELX_BOVIN Amelogenin, X isoform OS=Bos taurus OX=9913 GN=AMELX PE=1 SV=2	1	hf1_10472_ebo_24_1_261219.ScanId;v=1;d1=33098.33098.3	controllerType=0 controllerNumber=1 scan=33098	68.1703
46987:3	1	S.MP[+15.995]LP[+15.995]PHPGHP[+31.990]GY[+31.990]INFSYEVLTPL.K		P[+16]*2[+32], Y[+32]	891.429	3	2672.27	2672.27	0	0.8	17	Non	17.95	17.95	0	1.27	1304	>sp|P02817|AMELX_BOVIN Amelogenin, X isoform OS=Bos taurus OX=9913 GN=AMELX PE=1 SV=2	1	hf1_10472_ebo_24_1_261219.ScanId;v=1;d1=34607.34607.3	controllerType=0 controllerNumber=1 scan=34607	73.2623
45710:3	1	S.MP[+15.995]LPPHPGHP[+31.990]GY[+31.990]INFSY[+15.995]EVLTPL.K		P[+16][+32], Y[+16][+32]	891.429	3	2672.27	2672.27	0	0.6	17	Non	37.25	37.25	0	1.27	1304	>sp|P02817|AMELX_BOVIN Amelogenin, X isoform OS=Bos taurus OX=9913 GN=AMELX PE=1 SV=2	1	hf1_10472_ebo_24_1_261219.ScanId;v=1;d1=33202.33202.3	controllerType=0 controllerNumber=1 scan=33202	68.5148
45504:3	1	S.MP[+15.995]LPPHPGHP[+31.990]GY[+31.990]INFSY[+15.995]EVLTPL.K		P[+16][+32], Y[+16][+32]	891.428	3	2672.27	2672.27	0	0.3	17	Non	40.47	40.47	0	1.27	1304	>sp|P02817|AMELX_BOVIN Amelogenin, X isoform OS=Bos taurus OX=9913 GN=AMELX PE=1 SV=2	1	hf1_10472_ebo_24_1_261219.ScanId;v=1;d1=32995.32995.3	controllerType=0 controllerNumber=1 scan=32995	67.834
41506:3	1	S.MP[+15.995]LPPHPGHP[+15.995]GY[+31.990]INFSY[+31.990]EVLTPL.K		P[+16]*2, Y[+32]*2	891.432	3	2672.28	2672.27	0	3.7	17	Non	81.33	81.33	0	2.19	1304	>sp|P02817|AMELX_BOVIN Amelogenin, X isoform OS=Bos taurus OX=9913 GN=AMELX PE=1 SV=2	1	hf1_10472_ebo_24_1_261219.ScanId;v=1;d1=30061.30061.3	controllerType=0 controllerNumber=1 scan=30061	61.3736
47321:3	1	S.MP[+15.995]LPPHPGHP[+31.990]GY[+31.990]INFSY[+15.995]EVLTPL.K		P[+16][+32], Y[+16][+32]	891.433	3	2672.28	2672.27	0	4.8	17	Non	87.21	87.21	0	2.22	1304	>sp|P02817|AMELX_BOVIN Amelogenin, X isoform OS=Bos taurus OX=9913 GN=AMELX PE=1 SV=2	1	hf1_10472_ebo_24_1_261219.ScanId;v=1;d1=34887.34887.3	controllerType=0 controllerNumber=1 scan=34887	73.9534
45397:3	1	S.MP[+15.995]LPPHPGHP[+31.990]GY[+31.990]INFSY[+15.995]EVLTPL.K		P[+16][+32], Y[+16][+32]	891.43	3	2672.27	2672.27	0	1.6	17	Non	92.19	92.19	0	2.19	1304	>sp|P02817|AMELX_BOVIN Amelogenin, X isoform OS=Bos taurus OX=9913 GN=AMELX PE=1 SV=2	1	hf1_10472_ebo_24_1_261219.ScanId;v=1;d1=32888.32888.3	controllerType=0 controllerNumber=1 scan=32888	67.4935
45269:3	1	S.MP[+15.995]LPPHPGHP[+15.995]GYINF[+31.990]SY[+31.990]EVLTPL.K		F[+32], P[+16]*2, Y[+32]	891.429	3	2672.27	2672.27	0	0.6	17	Non	95.8	95.8	0	2.2	1304	>sp|P02817|AMELX_BOVIN Amelogenin, X isoform OS=Bos taurus OX=9913 GN=AMELX PE=1 SV=2	1	hf1_10472_ebo_24_1_261219.ScanId;v=1;d1=32767.32767.3	controllerType=0 controllerNumber=1 scan=32767	67.1528
39574:3	1	S.MP[+15.995]LPPHPGHP[+31.990]GY[+15.995]INF[+31.990]SYEVLTPL.K		F[+32], P[+16][+32], Y[+16]	891.432	3	2672.28	2672.27	0	4	17	Non	133.24	133.24	2	1.5	1304	>sp|P02817|AMELX_BOVIN Amelogenin, X isoform OS=Bos taurus OX=9913 GN=AMELX PE=1 SV=2	1	hf1_10472_ebo_24_1_261219.ScanId;v=1;d1=28813.28813.3	controllerType=0 controllerNumber=1 scan=28813	59.1415
40788:3	1	S.MP[+15.995]LPPHPGHP[+31.990]GY[+15.995]INF[+31.990]SYEVLTPL.K		F[+32], P[+16][+32], Y[+16]	891.431	3	2672.28	2672.27	0	3.6	17	Non	135.96	135.96	0	2.22	1304	>sp|P02817|AMELX_BOVIN Amelogenin, X isoform OS=Bos taurus OX=9913 GN=AMELX PE=1 SV=2	1	hf1_10472_ebo_24_1_261219.ScanId;v=1;d1=29600.29600.3	controllerType=0 controllerNumber=1 scan=29600	60.546
33946:3	1	S.MP[+15.995]LPPHPGHP[+15.995]GY[+31.990]INF[+31.990]SYEVLTPL.K		F[+32], P[+16]*2, Y[+32]	891.429	3	2672.27	2672.27	0	1.1	17	Non	166.92	166.92	3.74	2.24	1304	>sp|P02817|AMELX_BOVIN Amelogenin, X isoform OS=Bos taurus OX=9913 GN=AMELX PE=1 SV=2	1	hf1_10472_ebo_24_1_261219.ScanId;v=1;d1=25134.25134.4	controllerType=0 controllerNumber=1 scan=25134	52.4806
39287:3	1	S.MP[+15.995]LPPHPGHP[+31.990]GY[+15.995]INF[+31.990]SYEVLTPL.K		F[+32], P[+16][+32], Y[+16]	891.433	3	2672.28	2672.27	0	5.1	17	Non	195.48	195.48	0.71	2.77	1304	>sp|P02817|AMELX_BOVIN Amelogenin, X isoform OS=Bos taurus OX=9913 GN=AMELX PE=1 SV=2	1	hf1_10472_ebo_24_1_261219.ScanId;v=1;d1=28622.28622.3	controllerType=0 controllerNumber=1 scan=28622	58.7968
34561:3	1	S.MP[+15.995]LPPHPGHPGYIN[+0.984]F[+31.990]SY[+31.990]EVLTPL.K		F[+32], N[+1], P[+16], Y[+32]	886.427	3	2657.27	2657.26	0	2.3	17	Non	235.5	235.5	5.8	2.39	1304	>sp|P02817|AMELX_BOVIN Amelogenin, X isoform OS=Bos taurus OX=9913 GN=AMELX PE=1 SV=2	1	hf1_10472_ebo_24_1_261219.ScanId;v=1;d1=25546.25546.6	controllerType=0 controllerNumber=1 scan=25546	53.2234
34166:3	1	S.MP[+15.995]LPPHPGHPGYIN[+0.984]F[+31.990]SY[+31.990]EVLTPL.K		F[+32], N[+1], P[+16], Y[+32]	886.426	3	2657.26	2657.26	0	1.4	17	Non	235.65	235.65	5.8	2.28	1304	>sp|P02817|AMELX_BOVIN Amelogenin, X isoform OS=Bos taurus OX=9913 GN=AMELX PE=1 SV=2	1	hf1_10472_ebo_24_1_261219.ScanId;v=1;d1=25281.25281.3	controllerType=0 controllerNumber=1 scan=25281	52.7499
00086:3	1	S.MPLPPHPGHPGYINFS[+79.966]YEVLTPLK.W		S[+80]	928.796	3	2784.37	2784.36	0	4.3	17	NRagged	135.03	135.03	41.66	3.78	1304	>sp|P02817|AMELX_BOVIN Amelogenin, X isoform OS=Bos taurus OX=9913 GN=AMELX PE=1 SV=2	1	hf1_10472_ebo_24_1_261219.ScanId;v=1;d1=591.591.3	controllerType=0 controllerNumber=1 scan=591	3.3268
22941:5	1	S.MP[+15.995]LPPHPGHPGYINFSYEVLTPLK.W		P[+16]	544.887	5	2720.41	2720.39	0	5.6	17	NRagged	137.72	137.72	4	2.43	1304	>sp|P02817|AMELX_BOVIN Amelogenin, X isoform OS=Bos taurus OX=9913 GN=AMELX PE=1 SV=2	1	hf1_10472_ebo_24_1_261219.ScanId;v=1;d1=17700.17700.2	controllerType=0 controllerNumber=1 scan=17700	39.4035
26021:4	1	S.MP[+15.995]LPPHPGHPGYINFSYEVLTPLK.W		P[+16]	680.858	4	2720.41	2720.39	0	7	17	NRagged	156.17	156.17	4	2.85	1304	>sp|P02817|AMELX_BOVIN Amelogenin, X isoform OS=Bos taurus OX=9913 GN=AMELX PE=1 SV=2	1	hf1_10472_ebo_24_1_261219.ScanId;v=1;d1=19807.19807.2	controllerType=0 controllerNumber=1 scan=19807	43.0471
25152:4	1	S.MP[+15.995]LPPHPGHPGYINFSYEVLTPLK.W		P[+16]	680.858	4	2720.41	2720.39	0	6.9	17	NRagged	305.38	305.38	4	5.98	1304	>sp|P02817|AMELX_BOVIN Amelogenin, X isoform OS=Bos taurus OX=9913 GN=AMELX PE=1 SV=2	1	hf1_10472_ebo_24_1_261219.ScanId;v=1;d1=19215.19215.4	controllerType=0 controllerNumber=1 scan=19215	42.0237
27789:4	1	S.MP[+15.995]LPPHPGHPGYINFSYEVLTPLK.W		P[+16]	680.859	4	2720.42	2720.39	0	9.3	17	NRagged	375.32	375.32	15.27	6.45	1304	>sp|P02817|AMELX_BOVIN Amelogenin, X isoform OS=Bos taurus OX=9913 GN=AMELX PE=1 SV=2	1	hf1_10472_ebo_24_1_261219.ScanId;v=1;d1=21039.21039.4	controllerType=0 controllerNumber=1 scan=21039	45.1951
25893:4	1	S.MP[+15.995]LPPHPGHPGYINFSYEVLTPLK.W		P[+16]	680.858	4	2720.41	2720.39	0	6.8	17	NRagged	379.83	379.83	4	7.03	1304	>sp|P02817|AMELX_BOVIN Amelogenin, X isoform OS=Bos taurus OX=9913 GN=AMELX PE=1 SV=2	1	hf1_10472_ebo_24_1_261219.ScanId;v=1;d1=19719.19719.4	controllerType=0 controllerNumber=1 scan=19719	42.8946
27435:4	1	S.MP[+15.995]LPPHPGHPGYINFSYEVLTPLK.W		P[+16]	680.854	4	2720.39	2720.39	0	1.2	17	NRagged	403.93	403.93	4	6.12	1304	>sp|P02817|AMELX_BOVIN Amelogenin, X isoform OS=Bos taurus OX=9913 GN=AMELX PE=1 SV=2	1	hf1_10472_ebo_24_1_261219.ScanId;v=1;d1=20786.20786.4	controllerType=0 controllerNumber=1 scan=20786	44.7467
29913:3	1	S.MPLPPHPGHPGYINFS[+79.966]YEVLTPLK.W		S[+80]	928.792	3	2784.36	2784.36	0	0.1	17	NRagged	412.04	412.04	158.33	6	1304	>sp|P02817|AMELX_BOVIN Amelogenin, X isoform OS=Bos taurus OX=9913 GN=AMELX PE=1 SV=2	1	hf1_10472_ebo_24_1_261219.ScanId;v=1;d1=22452.22452.4	controllerType=0 controllerNumber=1 scan=22452	47.6922
26807:4	1	S.MP[+15.995]LPPHPGHPGYINFSYEVLTPLK.W		P[+16]	680.856	4	2720.4	2720.39	0	4.4	17	NRagged	477.48	477.48	4	7.35	1304	>sp|P02817|AMELX_BOVIN Amelogenin, X isoform OS=Bos taurus OX=9913 GN=AMELX PE=1 SV=2	1	hf1_10472_ebo_24_1_261219.ScanId;v=1;d1=20335.20335.4	controllerType=0 controllerNumber=1 scan=20335	43.9651
26494:4	1	S.MP[+15.995]LPPHPGHPGYINFSYEVLTPLK.W		P[+16]	680.857	4	2720.41	2720.39	0	6	17	NRagged	481.34	481.34	4	7.45	1304	>sp|P02817|AMELX_BOVIN Amelogenin, X isoform OS=Bos taurus OX=9913 GN=AMELX PE=1 SV=2	1	hf1_10472_ebo_24_1_261219.ScanId;v=1;d1=20122.20122.4	controllerType=0 controllerNumber=1 scan=20122	43.5933
30075:4	1	S.MPLPPHPGHPGYINFS[+79.966]YEVLTPLK.W		S[+80]	696.845	4	2784.36	2784.36	0	-1.5	17	NRagged	514.82	514.82	181.61	6.27	1304	>sp|P02817|AMELX_BOVIN Amelogenin, X isoform OS=Bos taurus OX=9913 GN=AMELX PE=1 SV=2	1	hf1_10472_ebo_24_1_261219.ScanId;v=1;d1=22557.22557.4	controllerType=0 controllerNumber=1 scan=22557	47.8791
25491:4	1	S.MP[+15.995]LPPHPGHPGYINFSYEVLTPLK.W		P[+16]	680.858	4	2720.41	2720.39	0	7	17	NRagged	533.99	533.99	4	7.71	1304	>sp|P02817|AMELX_BOVIN Amelogenin, X isoform OS=Bos taurus OX=9913 GN=AMELX PE=1 SV=2	1	hf1_10472_ebo_24_1_261219.ScanId;v=1;d1=19445.19445.4	controllerType=0 controllerNumber=1 scan=19445	42.4205
29776:4	1	S.MPLPPHPGHPGYINFS[+79.966]YEVLTPLK.W		S[+80]	696.849	4	2784.38	2784.36	0	5	17	NRagged	545.91	545.91	194.91	7.47	1304	>sp|P02817|AMELX_BOVIN Amelogenin, X isoform OS=Bos taurus OX=9913 GN=AMELX PE=1 SV=2	1	hf1_10472_ebo_24_1_261219.ScanId;v=1;d1=22364.22364.4	controllerType=0 controllerNumber=1 scan=22364	47.5359
47223:4	1	S.MP[+15.995]LPPHPGHPGYINFSYEVLTPLK.W		P[+16]	680.858	4	2720.41	2720.39	0	7.5	17	NRagged	548.84	548.84	4	7.71	1304	>sp|P02817|AMELX_BOVIN Amelogenin, X isoform OS=Bos taurus OX=9913 GN=AMELX PE=1 SV=2	1	hf1_10472_ebo_24_1_261219.ScanId;v=1;d1=34789.34789.4	controllerType=0 controllerNumber=1 scan=34789	73.616
26564:3	1	S.M[+15.995]PLPPHPGHPGYINFSYEVLTPLK.W		M[+16]	907.475	3	2720.41	2720.39	0	7.3	17	NRagged	590.71	590.71	23.4	8.63	1304	>sp|P02817|AMELX_BOVIN Amelogenin, X isoform OS=Bos taurus OX=9913 GN=AMELX PE=1 SV=2	1	hf1_10472_ebo_24_1_261219.ScanId;v=1;d1=20172.20172.4	controllerType=0 controllerNumber=1 scan=20172	43.6788
26198:4	1	S.MP[+15.995]LPPHPGHPGYINFSYEVLTPLK.W		P[+16]	680.858	4	2720.41	2720.39	0	7.8	17	NRagged	620.3	620.3	4	9.52	1304	>sp|P02817|AMELX_BOVIN Amelogenin, X isoform OS=Bos taurus OX=9913 GN=AMELX PE=1 SV=2	1	hf1_10472_ebo_24_1_261219.ScanId;v=1;d1=19924.19924.4	controllerType=0 controllerNumber=1 scan=19924	43.2513
26945:3	1	S.M[+15.995]PLPPHPGHPGYINFSYEVLTPLK.W		M[+16]	907.471	3	2720.4	2720.39	0	2.5	17	NRagged	666.37	666.37	31.69	10.14	1304	>sp|P02817|AMELX_BOVIN Amelogenin, X isoform OS=Bos taurus OX=9913 GN=AMELX PE=1 SV=2	1	hf1_10472_ebo_24_1_261219.ScanId;v=1;d1=20435.20435.3	controllerType=0 controllerNumber=1 scan=20435	44.1385
29174:4	1	S.MPLPPHPGHPGYINFS[+79.966]YEVLTPLK.W		S[+80]	696.851	4	2784.38	2784.36	0	7	17	NRagged	674.65	674.65	347.18	10.52	1304	>sp|P02817|AMELX_BOVIN Amelogenin, X isoform OS=Bos taurus OX=9913 GN=AMELX PE=1 SV=2	1	hf1_10472_ebo_24_1_261219.ScanId;v=1;d1=21972.21972.4	controllerType=0 controllerNumber=1 scan=21972	46.8453
29470:4	1	S.MPLPPHPGHPGYINFS[+79.966]YEVLTPLK.W		S[+80]	696.851	4	2784.38	2784.36	0	7.7	17	NRagged	817.01	817.01	457.05	13.52	1304	>sp|P02817|AMELX_BOVIN Amelogenin, X isoform OS=Bos taurus OX=9913 GN=AMELX PE=1 SV=2	1	hf1_10472_ebo_24_1_261219.ScanId;v=1;d1=22166.22166.4	controllerType=0 controllerNumber=1 scan=22166	47.1865
26156:3	1	S.M[+15.995]PLPPHPGHPGYINFSYEVLTPLK.W		M[+16]	907.475	3	2720.41	2720.39	0	7.7	17	NRagged	834.83	834.83	53.47	13.63	1304	>sp|P02817|AMELX_BOVIN Amelogenin, X isoform OS=Bos taurus OX=9913 GN=AMELX PE=1 SV=2	1	hf1_10472_ebo_24_1_261219.ScanId;v=1;d1=19896.19896.3	controllerType=0 controllerNumber=1 scan=19896	43.2018
29936:3	1	S.MPLPPHPGHPGYINFS[+79.966]YEVLTPLK.W		S[+80]	928.792	3	2784.36	2784.36	0	-0.3	17	NRagged	864.4	864.4	372.47	13.66	1304	>sp|P02817|AMELX_BOVIN Amelogenin, X isoform OS=Bos taurus OX=9913 GN=AMELX PE=1 SV=2	1	hf1_10472_ebo_24_1_261219.ScanId;v=1;d1=22467.22467.3	controllerType=0 controllerNumber=1 scan=22467	47.7207
47179:3	1	S.MPLPPHPGHPGYINFS[+79.966]YEVLTPLK.W		S[+80]	928.799	3	2784.38	2784.36	0	7.1	17	NRagged	906.89	906.89	405.12	15.63	1304	>sp|P02817|AMELX_BOVIN Amelogenin, X isoform OS=Bos taurus OX=9913 GN=AMELX PE=1 SV=2	1	hf1_10472_ebo_24_1_261219.ScanId;v=1;d1=34755.34755.3	controllerType=0 controllerNumber=1 scan=34755	73.5568
29640:3	1	S.MPLPPHPGHPGYINFS[+79.966]YEVLTPLK.W		S[+80]	928.795	3	2784.37	2784.36	0	3.5	17	NRagged	941.56	941.56	403.09	15.14	1304	>sp|P02817|AMELX_BOVIN Amelogenin, X isoform OS=Bos taurus OX=9913 GN=AMELX PE=1 SV=2	1	hf1_10472_ebo_24_1_261219.ScanId;v=1;d1=22276.22276.3	controllerType=0 controllerNumber=1 scan=22276	47.38
29333:3	1	S.MPLPPHPGHPGYINFS[+79.966]YEVLTPLK.W		S[+80]	928.798	3	2784.38	2784.36	0	6.8	17	NRagged	1148.8	1148.8	519.37	19.63	1304	>sp|P02817|AMELX_BOVIN Amelogenin, X isoform OS=Bos taurus OX=9913 GN=AMELX PE=1 SV=2	1	hf1_10472_ebo_24_1_261219.ScanId;v=1;d1=22078.22078.3	controllerType=0 controllerNumber=1 scan=22078	47.0325
00082:3	1	S.MP[+15.995]LPPHPGHPGYINFS[+79.966]YEVLTPLK.W		P[+16], S[+80]	934.128	3	2800.37	2800.36	0	4.4	17	NRagged	10.78	10.78	4	2.54	1304	>sp|P02817|AMELX_BOVIN Amelogenin, X isoform OS=Bos taurus OX=9913 GN=AMELX PE=1 SV=2	1	hf1_10472_ebo_24_1_261219.ScanId;v=1;d1=588.588.3	controllerType=0 controllerNumber=1 scan=588	3.3223
46499:3	1	S.MP[+15.995]LPPHPGHPGYINFS[+79.966]YEVLTPLK.W		P[+16], S[+80]	934.128	3	2800.37	2800.36	0	4.3	17	NRagged	32.35	32.35	4	2.57	1304	>sp|P02817|AMELX_BOVIN Amelogenin, X isoform OS=Bos taurus OX=9913 GN=AMELX PE=1 SV=2	1	hf1_10472_ebo_24_1_261219.ScanId;v=1;d1=34095.34095.3	controllerType=0 controllerNumber=1 scan=34095	71.6397
46059:3	1	S.MP[+15.995]LPPHPGHPGYINFS[+79.966]YEVLTPLK.W		P[+16], S[+80]	934.128	3	2800.37	2800.36	0	4.5	17	NRagged	109.66	109.66	4	2.77	1304	>sp|P02817|AMELX_BOVIN Amelogenin, X isoform OS=Bos taurus OX=9913 GN=AMELX PE=1 SV=2	1	hf1_10472_ebo_24_1_261219.ScanId;v=1;d1=33536.33536.3	controllerType=0 controllerNumber=1 scan=33536	69.5421
46604:3	1	S.MP[+15.995]LPPHPGHPGYINFS[+79.966]YEVLTPLK.W		P[+16], S[+80]	934.126	3	2800.36	2800.36	0	2	17	NRagged	118.37	118.37	4	3	1304	>sp|P02817|AMELX_BOVIN Amelogenin, X isoform OS=Bos taurus OX=9913 GN=AMELX PE=1 SV=2	1	hf1_10472_ebo_24_1_261219.ScanId;v=1;d1=34203.34203.3	controllerType=0 controllerNumber=1 scan=34203	71.9816
45961:3	1	S.MP[+15.995]LPPHPGHPGYINFS[+79.966]YEVLTPLK.W		P[+16], S[+80]	934.126	3	2800.36	2800.36	0	2.3	17	NRagged	119.05	119.05	4	2.59	1304	>sp|P02817|AMELX_BOVIN Amelogenin, X isoform OS=Bos taurus OX=9913 GN=AMELX PE=1 SV=2	1	hf1_10472_ebo_24_1_261219.ScanId;v=1;d1=33432.33432.3	controllerType=0 controllerNumber=1 scan=33432	69.2017
45849:3	1	S.MP[+15.995]LPPHPGHPGYINFS[+79.966]YEVLTPLK.W		P[+16], S[+80]	934.127	3	2800.37	2800.36	0	3.2	17	NRagged	137.13	137.13	4	3.54	1304	>sp|P02817|AMELX_BOVIN Amelogenin, X isoform OS=Bos taurus OX=9913 GN=AMELX PE=1 SV=2	1	hf1_10472_ebo_24_1_261219.ScanId;v=1;d1=33324.33324.3	controllerType=0 controllerNumber=1 scan=33324	68.8601
46715:3	1	S.MP[+15.995]LPPHPGHPGYINFS[+79.966]YEVLTPLK.W		P[+16], S[+80]	934.126	3	2800.36	2800.36	0	2.8	17	NRagged	141.52	141.52	4	2.76	1304	>sp|P02817|AMELX_BOVIN Amelogenin, X isoform OS=Bos taurus OX=9913 GN=AMELX PE=1 SV=2	1	hf1_10472_ebo_24_1_261219.ScanId;v=1;d1=34315.34315.3	controllerType=0 controllerNumber=1 scan=34315	72.3197
33543:4	1	S.MP[+15.995]LPPHPGHPGYINFS[+79.966]YEVLTPLK.W		P[+16], S[+80]	700.851	4	2800.38	2800.36	0	8.4	17	NRagged	154.69	154.69	4	2.46	1304	>sp|P02817|AMELX_BOVIN Amelogenin, X isoform OS=Bos taurus OX=9913 GN=AMELX PE=1 SV=2	1	hf1_10472_ebo_24_1_261219.ScanId;v=1;d1=24873.24873.5	controllerType=0 controllerNumber=1 scan=24873	52.0112
46816:3	1	S.MP[+15.995]LPPHPGHPGYINFS[+79.966]YEVLTPLK.W		P[+16], S[+80]	934.127	3	2800.37	2800.36	0	3.1	17	NRagged	161.51	161.51	4	4.07	1304	>sp|P02817|AMELX_BOVIN Amelogenin, X isoform OS=Bos taurus OX=9913 GN=AMELX PE=1 SV=2	1	hf1_10472_ebo_24_1_261219.ScanId;v=1;d1=34423.34423.3	controllerType=0 controllerNumber=1 scan=34423	72.6657
35464:4	1	S.MP[+15.995]LPPHPGHPGYINFS[+79.966]YEVLTPLK.W		P[+16], S[+80]	700.849	4	2800.37	2800.36	0	6.4	17	NRagged	174.97	174.97	4	4.17	1304	>sp|P02817|AMELX_BOVIN Amelogenin, X isoform OS=Bos taurus OX=9913 GN=AMELX PE=1 SV=2	1	hf1_10472_ebo_24_1_261219.ScanId;v=1;d1=26154.26154.4	controllerType=0 controllerNumber=1 scan=26154	54.3527
43308:4	1	S.MP[+15.995]LPPHPGHPGYINFS[+79.966]YEVLTPLK.W		P[+16], S[+80]	700.85	4	2800.38	2800.36	0	7.4	17	NRagged	175.41	175.41	4	4.17	1304	>sp|P02817|AMELX_BOVIN Amelogenin, X isoform OS=Bos taurus OX=9913 GN=AMELX PE=1 SV=2	1	hf1_10472_ebo_24_1_261219.ScanId;v=1;d1=31251.31251.4	controllerType=0 controllerNumber=1 scan=31251	63.592
47046:3	1	S.MP[+15.995]LPPHPGHPGYINFS[+79.966]YEVLTPLK.W		P[+16], S[+80]	934.129	3	2800.37	2800.36	0	5.4	17	NRagged	183.59	183.59	4	4.09	1304	>sp|P02817|AMELX_BOVIN Amelogenin, X isoform OS=Bos taurus OX=9913 GN=AMELX PE=1 SV=2	1	hf1_10472_ebo_24_1_261219.ScanId;v=1;d1=34652.34652.3	controllerType=0 controllerNumber=1 scan=34652	73.3503
32412:4	1	S.MP[+15.995]LPPHPGHPGYINFS[+79.966]YEVLTPLK.W		P[+16], S[+80]	700.848	4	2800.37	2800.36	0	5.1	17	NRagged	217.88	217.88	4	3.99	1304	>sp|P02817|AMELX_BOVIN Amelogenin, X isoform OS=Bos taurus OX=9913 GN=AMELX PE=1 SV=2	1	hf1_10472_ebo_24_1_261219.ScanId;v=1;d1=24089.24089.4	controllerType=0 controllerNumber=1 scan=24089	50.5977
30228:4	1	S.MP[+15.995]LPPHPGHPGYINFS[+79.966]YEVLTPLK.W		P[+16], S[+80]	700.848	4	2800.37	2800.36	0	4.7	17	NRagged	221.3	221.3	4	3.73	1304	>sp|P02817|AMELX_BOVIN Amelogenin, X isoform OS=Bos taurus OX=9913 GN=AMELX PE=1 SV=2	1	hf1_10472_ebo_24_1_261219.ScanId;v=1;d1=22656.22656.6	controllerType=0 controllerNumber=1 scan=22656	48.0522
47388:3	1	S.MP[+15.995]LPPHPGHPGYINFS[+79.966]YEVLTPLK.W		P[+16], S[+80]	934.132	3	2800.38	2800.36	0	8.8	17	NRagged	245.87	245.87	4	5.64	1304	>sp|P02817|AMELX_BOVIN Amelogenin, X isoform OS=Bos taurus OX=9913 GN=AMELX PE=1 SV=2	1	hf1_10472_ebo_24_1_261219.ScanId;v=1;d1=34963.34963.3	controllerType=0 controllerNumber=1 scan=34963	74.2749
27215:5	1	S.MP[+15.995]LPPHPGHPGYINFS[+79.966]YEVLTPLK.W		P[+16], S[+80]	560.881	5	2800.37	2800.36	0	6.3	17	NRagged	263.41	263.41	4	4.56	1304	>sp|P02817|AMELX_BOVIN Amelogenin, X isoform OS=Bos taurus OX=9913 GN=AMELX PE=1 SV=2	1	hf1_10472_ebo_24_1_261219.ScanId;v=1;d1=20621.20621.5	controllerType=0 controllerNumber=1 scan=20621	44.4578
28935:4	1	S.M[+31.990]PLPPHPGHPGYINFS[+79.966]YEVLTPLK.W		M[+32], S[+80]	704.848	4	2816.37	2816.35	0	6.3	17	NRagged	270.6	270.6	0	5.38	1304	>sp|P02817|AMELX_BOVIN Amelogenin, X isoform OS=Bos taurus OX=9913 GN=AMELX PE=1 SV=2	1	hf1_10472_ebo_24_1_261219.ScanId;v=1;d1=21817.21817.4	controllerType=0 controllerNumber=1 scan=21817	46.5738
45612:3	1	S.MP[+15.995]LPPHPGHPGYINFS[+79.966]YEVLTPLK.W		P[+16], S[+80]	934.128	3	2800.37	2800.36	0	4.1	17	NRagged	278.13	278.13	4	5.28	1304	>sp|P02817|AMELX_BOVIN Amelogenin, X isoform OS=Bos taurus OX=9913 GN=AMELX PE=1 SV=2	1	hf1_10472_ebo_24_1_261219.ScanId;v=1;d1=33101.33101.3	controllerType=0 controllerNumber=1 scan=33101	68.1788
29721:4	1	S.MP[+15.995]LPPHPGHPGYIN[+0.984]FSYEVLTPLK.W		N[+1], P[+16]	681.103	4	2721.39	2721.37	0	5.5	17	NRagged	280.28	280.28	4	5.32	1304	>sp|P02817|AMELX_BOVIN Amelogenin, X isoform OS=Bos taurus OX=9913 GN=AMELX PE=1 SV=2	1	hf1_10472_ebo_24_1_261219.ScanId;v=1;d1=22327.22327.4	controllerType=0 controllerNumber=1 scan=22327	47.4678
34988:3	1	S.MP[+15.995]LPPHPGHPGYINFS[+79.966]YEVLTPLK.W		P[+16], S[+80]	934.128	3	2800.37	2800.36	0	4.5	17	NRagged	289.12	289.12	4	5.43	1304	>sp|P02817|AMELX_BOVIN Amelogenin, X isoform OS=Bos taurus OX=9913 GN=AMELX PE=1 SV=2	1	hf1_10472_ebo_24_1_261219.ScanId;v=1;d1=25838.25838.3	controllerType=0 controllerNumber=1 scan=25838	53.7661
32209:3	1	S.M[+15.995]PLPPHPGHPGYINFS[+79.966]YEVLTPLK.W		M[+16], S[+80]	934.122	3	2800.35	2800.36	0	-2	17	NRagged	292.67	292.67	13.19	4.56	1304	>sp|P02817|AMELX_BOVIN Amelogenin, X isoform OS=Bos taurus OX=9913 GN=AMELX PE=1 SV=2	1	hf1_10472_ebo_24_1_261219.ScanId;v=1;d1=23959.23959.3	controllerType=0 controllerNumber=1 scan=23959	50.3672
47331:4	1	S.MP[+15.995]LPPHPGHPGYINFS[+79.966]YEVLTPLK.W		P[+16], S[+80]	700.85	4	2800.38	2800.36	0	7.4	17	NRagged	294.72	294.72	4	5.98	1304	>sp|P02817|AMELX_BOVIN Amelogenin, X isoform OS=Bos taurus OX=9913 GN=AMELX PE=1 SV=2	1	hf1_10472_ebo_24_1_261219.ScanId;v=1;d1=34898.34898.4	controllerType=0 controllerNumber=1 scan=34898	73.9986
41398:3	1	S.MP[+15.995]LPPHPGHPGYINFS[+79.966]YEVLTPLK.W		P[+16], S[+80]	934.13	3	2800.38	2800.36	0	6.5	17	NRagged	296.52	296.52	4	5.67	1304	>sp|P02817|AMELX_BOVIN Amelogenin, X isoform OS=Bos taurus OX=9913 GN=AMELX PE=1 SV=2	1	hf1_10472_ebo_24_1_261219.ScanId;v=1;d1=29996.29996.3	controllerType=0 controllerNumber=1 scan=29996	61.2559
39585:3	1	S.M[+15.995]PLPPHPGHPGYINFS[+79.966]YEVLTPLK.W		M[+16], S[+80]	934.125	3	2800.36	2800.36	0	1.4	17	NRagged	301.52	301.52	4.29	4.58	1304	>sp|P02817|AMELX_BOVIN Amelogenin, X isoform OS=Bos taurus OX=9913 GN=AMELX PE=1 SV=2	1	hf1_10472_ebo_24_1_261219.ScanId;v=1;d1=28823.28823.3	controllerType=0 controllerNumber=1 scan=28823	59.1595
40591:3	1	S.MP[+15.995]LPPHPGHPGYINFS[+79.966]YEVLTPLK.W		P[+16], S[+80]	934.127	3	2800.37	2800.36	0	3.5	17	NRagged	303.93	303.93	4	5.33	1304	>sp|P02817|AMELX_BOVIN Amelogenin, X isoform OS=Bos taurus OX=9913 GN=AMELX PE=1 SV=2	1	hf1_10472_ebo_24_1_261219.ScanId;v=1;d1=29471.29471.3	controllerType=0 controllerNumber=1 scan=29471	60.3157
44491:4	1	S.MP[+15.995]LPPHPGHPGYINFS[+79.966]YEVLTPLK.W		P[+16], S[+80]	700.849	4	2800.37	2800.36	0	5.6	17	NRagged	304.61	304.61	4	6.2	1304	>sp|P02817|AMELX_BOVIN Amelogenin, X isoform OS=Bos taurus OX=9913 GN=AMELX PE=1 SV=2	1	hf1_10472_ebo_24_1_261219.ScanId;v=1;d1=32085.32085.4	controllerType=0 controllerNumber=1 scan=32085	65.3188
44166:4	1	S.MP[+15.995]LPPHPGHPGYINFS[+79.966]YEVLTPLK.W		P[+16], S[+80]	700.849	4	2800.38	2800.36	0	6.7	17	NRagged	308.57	308.57	4	5.98	1304	>sp|P02817|AMELX_BOVIN Amelogenin, X isoform OS=Bos taurus OX=9913 GN=AMELX PE=1 SV=2	1	hf1_10472_ebo_24_1_261219.ScanId;v=1;d1=31813.31813.4	controllerType=0 controllerNumber=1 scan=31813	64.6356
30827:4	1	S.MP[+15.995]LPPHPGHPGYINFS[+79.966]YEVLTPLK.W		P[+16], S[+80]	700.849	4	2800.37	2800.36	0	5.9	17	NRagged	310.95	310.95	4	5.47	1304	>sp|P02817|AMELX_BOVIN Amelogenin, X isoform OS=Bos taurus OX=9913 GN=AMELX PE=1 SV=2	1	hf1_10472_ebo_24_1_261219.ScanId;v=1;d1=23047.23047.6	controllerType=0 controllerNumber=1 scan=23047	48.7468
32971:3	1	S.MP[+15.995]LPPHPGHPGYINFS[+79.966]YEVLTPLK.W		P[+16], S[+80]	934.128	3	2800.37	2800.36	0	4	17	NRagged	312.33	312.33	4	5.18	1304	>sp|P02817|AMELX_BOVIN Amelogenin, X isoform OS=Bos taurus OX=9913 GN=AMELX PE=1 SV=2	1	hf1_10472_ebo_24_1_261219.ScanId;v=1;d1=24474.24474.3	controllerType=0 controllerNumber=1 scan=24474	51.2829
34701:3	1	S.M[+15.995]PLPPHPGHPGYINFS[+79.966]YEVLTPLK.W		M[+16], S[+80]	934.129	3	2800.37	2800.36	0	5.1	17	NRagged	319.7	319.7	2.43	5.43	1304	>sp|P02817|AMELX_BOVIN Amelogenin, X isoform OS=Bos taurus OX=9913 GN=AMELX PE=1 SV=2	1	hf1_10472_ebo_24_1_261219.ScanId;v=1;d1=25644.25644.3	controllerType=0 controllerNumber=1 scan=25644	53.4053
44611:4	1	S.MP[+15.995]LPPHPGHPGYINFS[+79.966]YEVLTPLK.W		P[+16], S[+80]	700.848	4	2800.37	2800.36	0	5	17	NRagged	332.16	332.16	4	6.33	1304	>sp|P02817|AMELX_BOVIN Amelogenin, X isoform OS=Bos taurus OX=9913 GN=AMELX PE=1 SV=2	1	hf1_10472_ebo_24_1_261219.ScanId;v=1;d1=32198.32198.4	controllerType=0 controllerNumber=1 scan=32198	65.6626
32810:3	1	S.MP[+15.995]LPPHPGHPGYINFS[+79.966]YEVLTPLK.W		P[+16], S[+80]	934.127	3	2800.37	2800.36	0	3.5	17	NRagged	332.65	332.65	4	5.47	1304	>sp|P02817|AMELX_BOVIN Amelogenin, X isoform OS=Bos taurus OX=9913 GN=AMELX PE=1 SV=2	1	hf1_10472_ebo_24_1_261219.ScanId;v=1;d1=24359.24359.3	controllerType=0 controllerNumber=1 scan=24359	51.0755
40483:3	1	S.MP[+15.995]LPPHPGHPGYINFS[+79.966]YEVLTPLK.W		P[+16], S[+80]	934.129	3	2800.37	2800.36	0	5.7	17	NRagged	334.6	334.6	4	5.56	1304	>sp|P02817|AMELX_BOVIN Amelogenin, X isoform OS=Bos taurus OX=9913 GN=AMELX PE=1 SV=2	1	hf1_10472_ebo_24_1_261219.ScanId;v=1;d1=29399.29399.3	controllerType=0 controllerNumber=1 scan=29399	60.1862
45505:3	1	S.M[+15.995]PLPPHPGHPGYINFS[+79.966]YEVLTPLK.W		M[+16], S[+80]	934.13	3	2800.37	2800.36	0	6.1	17	NRagged	337.06	337.06	16.58	5.99	1304	>sp|P02817|AMELX_BOVIN Amelogenin, X isoform OS=Bos taurus OX=9913 GN=AMELX PE=1 SV=2	1	hf1_10472_ebo_24_1_261219.ScanId;v=1;d1=32996.32996.3	controllerType=0 controllerNumber=1 scan=32996	67.8355
44360:4	1	S.MP[+15.995]LPPHPGHPGYINFS[+79.966]YEVLTPLK.W		P[+16], S[+80]	700.848	4	2800.37	2800.36	0	4.9	17	NRagged	338.89	338.89	4	6.33	1304	>sp|P02817|AMELX_BOVIN Amelogenin, X isoform OS=Bos taurus OX=9913 GN=AMELX PE=1 SV=2	1	hf1_10472_ebo_24_1_261219.ScanId;v=1;d1=31968.31968.4	controllerType=0 controllerNumber=1 scan=31968	64.9794
47000:4	1	S.MP[+15.995]LPPHPGHPGYINFS[+79.966]YEVLTPLK.W		P[+16], S[+80]	700.848	4	2800.37	2800.36	0	5.4	17	NRagged	342.1	342.1	4	5.88	1304	>sp|P02817|AMELX_BOVIN Amelogenin, X isoform OS=Bos taurus OX=9913 GN=AMELX PE=1 SV=2	1	hf1_10472_ebo_24_1_261219.ScanId;v=1;d1=34616.34616.4	controllerType=0 controllerNumber=1 scan=34616	73.2787
34716:3	1	S.M[+15.995]PLPPHPGHPGYINFS[+79.966]YEVLTPLK.W		M[+16], S[+80]	934.13	3	2800.38	2800.36	0	7	17	NRagged	358.4	358.4	6.9	5.8	1304	>sp|P02817|AMELX_BOVIN Amelogenin, X isoform OS=Bos taurus OX=9913 GN=AMELX PE=1 SV=2	1	hf1_10472_ebo_24_1_261219.ScanId;v=1;d1=25653.25653.3	controllerType=0 controllerNumber=1 scan=25653	53.4218
42264:3	1	S.M[+15.995]PLPPHPGHPGYINFS[+79.966]YEVLTPLK.W		M[+16], S[+80]	934.127	3	2800.37	2800.36	0	3.3	17	NRagged	360.81	360.81	0.99	6.23	1304	>sp|P02817|AMELX_BOVIN Amelogenin, X isoform OS=Bos taurus OX=9913 GN=AMELX PE=1 SV=2	1	hf1_10472_ebo_24_1_261219.ScanId;v=1;d1=30565.30565.3	controllerType=0 controllerNumber=1 scan=30565	62.2947
41692:3	1	S.M[+15.995]PLPPHPGHPGYINFS[+79.966]YEVLTPLK.W		M[+16], S[+80]	934.131	3	2800.38	2800.36	0	7.9	17	NRagged	369.58	369.58	8.45	7.15	1304	>sp|P02817|AMELX_BOVIN Amelogenin, X isoform OS=Bos taurus OX=9913 GN=AMELX PE=1 SV=2	1	hf1_10472_ebo_24_1_261219.ScanId;v=1;d1=30184.30184.3	controllerType=0 controllerNumber=1 scan=30184	61.6017
43711:3	1	S.MP[+15.995]LPPHPGHPGYINFS[+79.966]YEVLTPLK.W		P[+16], S[+80]	934.13	3	2800.38	2800.36	0	7.1	17	NRagged	376.35	376.35	4	6.92	1304	>sp|P02817|AMELX_BOVIN Amelogenin, X isoform OS=Bos taurus OX=9913 GN=AMELX PE=1 SV=2	1	hf1_10472_ebo_24_1_261219.ScanId;v=1;d1=31506.31506.3	controllerType=0 controllerNumber=1 scan=31506	64.0537
31792:3	1	S.M[+15.995]PLPPHPGHPGYINFS[+79.966]YEVLTPLK.W		M[+16], S[+80]	934.125	3	2800.36	2800.36	0	1.4	17	NRagged	380.42	380.42	4.52	6.05	1304	>sp|P02817|AMELX_BOVIN Amelogenin, X isoform OS=Bos taurus OX=9913 GN=AMELX PE=1 SV=2	1	hf1_10472_ebo_24_1_261219.ScanId;v=1;d1=23678.23678.3	controllerType=0 controllerNumber=1 scan=23678	49.8617
44756:4	1	S.MP[+15.995]LPPHPGHPGYINFS[+79.966]YEVLTPLK.W		P[+16], S[+80]	700.848	4	2800.37	2800.36	0	5.2	17	NRagged	393.48	393.48	4	7.24	1304	>sp|P02817|AMELX_BOVIN Amelogenin, X isoform OS=Bos taurus OX=9913 GN=AMELX PE=1 SV=2	1	hf1_10472_ebo_24_1_261219.ScanId;v=1;d1=32325.32325.4	controllerType=0 controllerNumber=1 scan=32325	66.0033
45042:4	1	S.MP[+15.995]LPPHPGHPGYINFS[+79.966]YEVLTPLK.W		P[+16], S[+80]	700.848	4	2800.37	2800.36	0	4.7	17	NRagged	397.98	397.98	4	7.24	1304	>sp|P02817|AMELX_BOVIN Amelogenin, X isoform OS=Bos taurus OX=9913 GN=AMELX PE=1 SV=2	1	hf1_10472_ebo_24_1_261219.ScanId;v=1;d1=32581.32581.4	controllerType=0 controllerNumber=1 scan=32581	66.6958
32683:3	1	S.M[+15.995]PLPPHPGHPGYINFS[+79.966]YEVLTPLK.W		M[+16], S[+80]	934.127	3	2800.37	2800.36	0	3.5	17	NRagged	404.44	404.44	7.68	6.14	1304	>sp|P02817|AMELX_BOVIN Amelogenin, X isoform OS=Bos taurus OX=9913 GN=AMELX PE=1 SV=2	1	hf1_10472_ebo_24_1_261219.ScanId;v=1;d1=24269.24269.3	controllerType=0 controllerNumber=1 scan=24269	50.9161
42569:3	1	S.MP[+15.995]LPPHPGHPGYINFS[+79.966]YEVLTPLK.W		P[+16], S[+80]	934.131	3	2800.38	2800.36	0	7.3	17	NRagged	414.12	414.12	4	6.83	1304	>sp|P02817|AMELX_BOVIN Amelogenin, X isoform OS=Bos taurus OX=9913 GN=AMELX PE=1 SV=2	1	hf1_10472_ebo_24_1_261219.ScanId;v=1;d1=30759.30759.3	controllerType=0 controllerNumber=1 scan=30759	62.6454
33703:3	1	S.M[+15.995]PLPPHPGHPGYINFS[+79.966]YEVLTPLK.W		M[+16], S[+80]	934.129	3	2800.37	2800.36	0	5	17	NRagged	420.36	420.36	1.76	6.4	1304	>sp|P02817|AMELX_BOVIN Amelogenin, X isoform OS=Bos taurus OX=9913 GN=AMELX PE=1 SV=2	1	hf1_10472_ebo_24_1_261219.ScanId;v=1;d1=24977.24977.3	controllerType=0 controllerNumber=1 scan=24977	52.2019
25659:4	1	S.MP[+15.995]LPPHPGHP[+15.995]GYINFSYEVLTPLK.W		P[+16]*2	684.855	4	2736.4	2736.39	0	5.2	17	NRagged	422.3	422.3	0	6.71	1304	>sp|P02817|AMELX_BOVIN Amelogenin, X isoform OS=Bos taurus OX=9913 GN=AMELX PE=1 SV=2	1	hf1_10472_ebo_24_1_261219.ScanId;v=1;d1=19557.19557.4	controllerType=0 controllerNumber=1 scan=19557	42.6135
38768:3	1	S.MP[+15.995]LPPHPGHPGYINFS[+79.966]YEVLTPLK.W		P[+16], S[+80]	934.129	3	2800.37	2800.36	0	6	17	NRagged	423.47	423.47	4	6.59	1304	>sp|P02817|AMELX_BOVIN Amelogenin, X isoform OS=Bos taurus OX=9913 GN=AMELX PE=1 SV=2	1	hf1_10472_ebo_24_1_261219.ScanId;v=1;d1=28285.28285.3	controllerType=0 controllerNumber=1 scan=28285	58.1873
45205:4	1	S.MP[+15.995]LPPHPGHPGYINFS[+79.966]YEVLTPLK.W		P[+16], S[+80]	700.847	4	2800.37	2800.36	0	3.8	17	NRagged	441.52	441.52	4	7.09	1304	>sp|P02817|AMELX_BOVIN Amelogenin, X isoform OS=Bos taurus OX=9913 GN=AMELX PE=1 SV=2	1	hf1_10472_ebo_24_1_261219.ScanId;v=1;d1=32719.32719.4	controllerType=0 controllerNumber=1 scan=32719	67.0496
44889:4	1	S.MP[+15.995]LPPHPGHPGYINFS[+79.966]YEVLTPLK.W		P[+16], S[+80]	700.848	4	2800.37	2800.36	0	4.6	17	NRagged	441.84	441.84	4	7.35	1304	>sp|P02817|AMELX_BOVIN Amelogenin, X isoform OS=Bos taurus OX=9913 GN=AMELX PE=1 SV=2	1	hf1_10472_ebo_24_1_261219.ScanId;v=1;d1=32446.32446.4	controllerType=0 controllerNumber=1 scan=32446	66.345
30361:3	1	S.M[+15.995]PLPPHPGHPGYINFS[+79.966]YEVLTPLK.W		M[+16], S[+80]	934.13	3	2800.38	2800.36	0	6.6	17	NRagged	446.96	446.96	25.01	6.82	1304	>sp|P02817|AMELX_BOVIN Amelogenin, X isoform OS=Bos taurus OX=9913 GN=AMELX PE=1 SV=2	1	hf1_10472_ebo_24_1_261219.ScanId;v=1;d1=22740.22740.6	controllerType=0 controllerNumber=1 scan=22740	48.201
40795:3	1	S.MP[+15.995]LPPHPGHPGYINFS[+79.966]YEVLTPLK.W		P[+16], S[+80]	934.127	3	2800.37	2800.36	0	3.5	17	NRagged	447.22	447.22	4	6.76	1304	>sp|P02817|AMELX_BOVIN Amelogenin, X isoform OS=Bos taurus OX=9913 GN=AMELX PE=1 SV=2	1	hf1_10472_ebo_24_1_261219.ScanId;v=1;d1=29605.29605.3	controllerType=0 controllerNumber=1 scan=29605	60.5536
31338:3	1	S.M[+15.995]PLPPHPGHPGYINFS[+79.966]YEVLTPLK.W		M[+16], S[+80]	934.127	3	2800.37	2800.36	0	3.9	17	NRagged	451.24	451.24	4.53	6.33	1304	>sp|P02817|AMELX_BOVIN Amelogenin, X isoform OS=Bos taurus OX=9913 GN=AMELX PE=1 SV=2	1	hf1_10472_ebo_24_1_261219.ScanId;v=1;d1=23375.23375.3	controllerType=0 controllerNumber=1 scan=23375	49.3234
25679:3	1	S.M[+15.995]PLPPHPGHPGYINFS[+79.966]YEVLTPLK.W		M[+16], S[+80]	934.132	3	2800.38	2800.36	0	8.6	17	NRagged	453.86	453.86	20.98	6.67	1304	>sp|P02817|AMELX_BOVIN Amelogenin, X isoform OS=Bos taurus OX=9913 GN=AMELX PE=1 SV=2	1	hf1_10472_ebo_24_1_261219.ScanId;v=1;d1=19569.19569.3	controllerType=0 controllerNumber=1 scan=19569	42.6336
45398:3	1	S.M[+15.995]PLPPHPGHPGYINFS[+79.966]YEVLTPLK.W		M[+16], S[+80]	934.127	3	2800.37	2800.36	0	3.9	17	NRagged	456.11	456.11	28.29	7.21	1304	>sp|P02817|AMELX_BOVIN Amelogenin, X isoform OS=Bos taurus OX=9913 GN=AMELX PE=1 SV=2	1	hf1_10472_ebo_24_1_261219.ScanId;v=1;d1=32889.32889.3	controllerType=0 controllerNumber=1 scan=32889	67.495
28601:4	1	S.M[+31.990]PLPPHPGHPGYINFS[+79.966]YEVLTPLK.W		M[+32], S[+80]	704.848	4	2816.37	2816.35	0	7.3	17	NRagged	500.4	500.4	0	7.24	1304	>sp|P02817|AMELX_BOVIN Amelogenin, X isoform OS=Bos taurus OX=9913 GN=AMELX PE=1 SV=2	1	hf1_10472_ebo_24_1_261219.ScanId;v=1;d1=21598.21598.4	controllerType=0 controllerNumber=1 scan=21598	46.1882
29793:4	1	S.MP[+15.995]LPPHPGHPGYINFS[+79.966]YEVLTPLK.W		P[+16], S[+80]	700.85	4	2800.38	2800.36	0	7.6	17	NRagged	501.66	501.66	5.8	7.24	1304	>sp|P02817|AMELX_BOVIN Amelogenin, X isoform OS=Bos taurus OX=9913 GN=AMELX PE=1 SV=2	1	hf1_10472_ebo_24_1_261219.ScanId;v=1;d1=22376.22376.4	controllerType=0 controllerNumber=1 scan=22376	47.5569
30386:4	1	S.MPLPPHPGHPGYIN[+0.984]FS[+79.966]YEVLTPLK.W		N[+1], S[+80]	697.096	4	2785.36	2785.35	0	6.2	17	NRagged	506.89	506.89	235.64	7.24	1304	>sp|P02817|AMELX_BOVIN Amelogenin, X isoform OS=Bos taurus OX=9913 GN=AMELX PE=1 SV=2	1	hf1_10472_ebo_24_1_261219.ScanId;v=1;d1=22758.22758.4	controllerType=0 controllerNumber=1 scan=22758	48.2329
43126:3	1	S.M[+15.995]PLPPHPGHPGYINFS[+79.966]YEVLTPLK.W		M[+16], S[+80]	934.131	3	2800.38	2800.36	0	7.5	17	NRagged	509.77	509.77	33.05	7.8	1304	>sp|P02817|AMELX_BOVIN Amelogenin, X isoform OS=Bos taurus OX=9913 GN=AMELX PE=1 SV=2	1	hf1_10472_ebo_24_1_261219.ScanId;v=1;d1=31129.31129.3	controllerType=0 controllerNumber=1 scan=31129	63.349
29366:4	1	S.MP[+15.995]LPPHPGHPGYINFS[+79.966]YEVLTPLK.W		P[+16], S[+80]	700.849	4	2800.37	2800.36	0	6.4	17	NRagged	513.43	513.43	5.8	7.24	1304	>sp|P02817|AMELX_BOVIN Amelogenin, X isoform OS=Bos taurus OX=9913 GN=AMELX PE=1 SV=2	1	hf1_10472_ebo_24_1_261219.ScanId;v=1;d1=22101.22101.4	controllerType=0 controllerNumber=1 scan=22101	47.0728
44544:3	1	S.M[+15.995]PLPPHPGHPGYINFS[+79.966]YEVLTPLK.W		M[+16], S[+80]	934.129	3	2800.37	2800.36	0	5.7	17	NRagged	541.11	541.11	12.08	7.59	1304	>sp|P02817|AMELX_BOVIN Amelogenin, X isoform OS=Bos taurus OX=9913 GN=AMELX PE=1 SV=2	1	hf1_10472_ebo_24_1_261219.ScanId;v=1;d1=32130.32130.3	controllerType=0 controllerNumber=1 scan=32130	65.4407
25972:3	1	S.M[+15.995]PLPPHPGHPGYINFS[+79.966]YEVLTPLK.W		M[+16], S[+80]	934.13	3	2800.38	2800.36	0	7.1	17	NRagged	547.66	547.66	17.96	7.83	1304	>sp|P02817|AMELX_BOVIN Amelogenin, X isoform OS=Bos taurus OX=9913 GN=AMELX PE=1 SV=2	1	hf1_10472_ebo_24_1_261219.ScanId;v=1;d1=19775.19775.3	controllerType=0 controllerNumber=1 scan=19775	42.9907
42853:3	1	S.M[+15.995]PLPPHPGHPGYINFS[+79.966]YEVLTPLK.W		M[+16], S[+80]	934.131	3	2800.38	2800.36	0	8.1	17	NRagged	551.6	551.6	23.32	7.83	1304	>sp|P02817|AMELX_BOVIN Amelogenin, X isoform OS=Bos taurus OX=9913 GN=AMELX PE=1 SV=2	1	hf1_10472_ebo_24_1_261219.ScanId;v=1;d1=30950.30950.3	controllerType=0 controllerNumber=1 scan=30950	62.9975
27096:4	1	S.MP[+15.995]LPPHPGHPGYIN[+0.984]FSYEVLTPLK.W		N[+1], P[+16]	681.105	4	2721.4	2721.37	0	7.9	17	NRagged	563	557.25	4	8.07	1304	>sp|P02817|AMELX_BOVIN Amelogenin, X isoform OS=Bos taurus OX=9913 GN=AMELX PE=1 SV=2	1	hf1_10472_ebo_24_1_261219.ScanId;v=1;d1=20537.20537.4	controllerType=0 controllerNumber=1 scan=20537	44.3136
29067:4	1	S.MP[+15.995]LPPHPGHPGYINFS[+79.966]YEVLTPLK.W		P[+16], S[+80]	700.848	4	2800.37	2800.36	0	4.8	17	NRagged	580.43	580.43	5.8	8.28	1304	>sp|P02817|AMELX_BOVIN Amelogenin, X isoform OS=Bos taurus OX=9913 GN=AMELX PE=1 SV=2	1	hf1_10472_ebo_24_1_261219.ScanId;v=1;d1=21904.21904.4	controllerType=0 controllerNumber=1 scan=21904	46.7274
28149:3	1	S.M[+31.990]PLPPHPGHPGYINFS[+79.966]YEVLTPLK.W		M[+32], S[+80]	939.461	3	2816.37	2816.35	0	6.3	17	NRagged	590.94	590.94	0	8.18	1304	>sp|P02817|AMELX_BOVIN Amelogenin, X isoform OS=Bos taurus OX=9913 GN=AMELX PE=1 SV=2	1	hf1_10472_ebo_24_1_261219.ScanId;v=1;d1=21294.21294.3	controllerType=0 controllerNumber=1 scan=21294	45.6483
44007:3	1	S.MP[+15.995]LPPHPGHPGYINFS[+79.966]YEVLTPLK.W		P[+16], S[+80]	934.13	3	2800.38	2800.36	0	6.9	17	NRagged	592.29	592.29	4	8.63	1304	>sp|P02817|AMELX_BOVIN Amelogenin, X isoform OS=Bos taurus OX=9913 GN=AMELX PE=1 SV=2	1	hf1_10472_ebo_24_1_261219.ScanId;v=1;d1=31697.31697.3	controllerType=0 controllerNumber=1 scan=31697	64.4005
43401:3	1	S.M[+15.995]PLPPHPGHPGYINFS[+79.966]YEVLTPLK.W		M[+16], S[+80]	934.132	3	2800.38	2800.36	0	9	17	NRagged	597.05	597.05	27.92	8.05	1304	>sp|P02817|AMELX_BOVIN Amelogenin, X isoform OS=Bos taurus OX=9913 GN=AMELX PE=1 SV=2	1	hf1_10472_ebo_24_1_261219.ScanId;v=1;d1=31307.31307.3	controllerType=0 controllerNumber=1 scan=31307	63.6963
30076:4	1	S.MPLPPHPGHPGYIN[+0.984]FS[+79.966]YEVLTPLK.W		N[+1], S[+80]	697.096	4	2785.36	2785.35	0	5.8	17	NRagged	602.11	602.11	298.82	9.28	1304	>sp|P02817|AMELX_BOVIN Amelogenin, X isoform OS=Bos taurus OX=9913 GN=AMELX PE=1 SV=2	1	hf1_10472_ebo_24_1_261219.ScanId;v=1;d1=22557.22557.4	controllerType=0 controllerNumber=1 scan=22557	47.8791
45270:3	1	S.M[+15.995]PLPPHPGHPGYINFS[+79.966]YEVLTPLK.W		M[+16], S[+80]	934.127	3	2800.37	2800.36	0	3.9	17	NRagged	602.77	602.77	28.32	9.14	1304	>sp|P02817|AMELX_BOVIN Amelogenin, X isoform OS=Bos taurus OX=9913 GN=AMELX PE=1 SV=2	1	hf1_10472_ebo_24_1_261219.ScanId;v=1;d1=32768.32768.3	controllerType=0 controllerNumber=1 scan=32768	67.1543
44810:3	1	S.M[+15.995]PLPPHPGHPGYINFS[+79.966]YEVLTPLK.W		M[+16], S[+80]	934.128	3	2800.37	2800.36	0	4.9	17	NRagged	618.24	618.24	59.11	9.4	1304	>sp|P02817|AMELX_BOVIN Amelogenin, X isoform OS=Bos taurus OX=9913 GN=AMELX PE=1 SV=2	1	hf1_10472_ebo_24_1_261219.ScanId;v=1;d1=32372.32372.3	controllerType=0 controllerNumber=1 scan=32372	66.1217
29869:3	1	S.M[+15.995]PLPPHPGHPGYINFS[+79.966]YEVLTPLK.W		M[+16], S[+80]	934.129	3	2800.37	2800.36	0	5.5	17	NRagged	647.47	647.47	20.01	9.4	1304	>sp|P02817|AMELX_BOVIN Amelogenin, X isoform OS=Bos taurus OX=9913 GN=AMELX PE=1 SV=2	1	hf1_10472_ebo_24_1_261219.ScanId;v=1;d1=22423.22423.3	controllerType=0 controllerNumber=1 scan=22423	47.6427
28176:4	1	S.MP[+15.995]LPPHPGHPGYINFS[+79.966]YEVLTPLK.W		P[+16], S[+80]	700.849	4	2800.37	2800.36	0	6	17	NRagged	652.22	652.22	4	10.28	1304	>sp|P02817|AMELX_BOVIN Amelogenin, X isoform OS=Bos taurus OX=9913 GN=AMELX PE=1 SV=2	1	hf1_10472_ebo_24_1_261219.ScanId;v=1;d1=21312.21312.4	controllerType=0 controllerNumber=1 scan=21312	45.6808
45105:3	1	S.M[+15.995]PLPPHPGHPGYINFS[+79.966]YEVLTPLK.W		M[+16], S[+80]	934.128	3	2800.37	2800.36	0	4.9	17	NRagged	664.48	664.48	51.28	10.4	1304	>sp|P02817|AMELX_BOVIN Amelogenin, X isoform OS=Bos taurus OX=9913 GN=AMELX PE=1 SV=2	1	hf1_10472_ebo_24_1_261219.ScanId;v=1;d1=32630.32630.3	controllerType=0 controllerNumber=1 scan=32630	66.8158
27632:4	1	S.M[+15.995]PLPPHPGHPGYINFS[+79.966]YEVLTPLK.W		M[+16], S[+80]	700.85	4	2800.38	2800.36	0	7.1	17	NRagged	673.46	673.46	7.45	10.52	1304	>sp|P02817|AMELX_BOVIN Amelogenin, X isoform OS=Bos taurus OX=9913 GN=AMELX PE=1 SV=2	1	hf1_10472_ebo_24_1_261219.ScanId;v=1;d1=20925.20925.4	controllerType=0 controllerNumber=1 scan=20925	44.9946
44661:3	1	S.M[+15.995]PLPPHPGHPGYINFS[+79.966]YEVLTPLK.W		M[+16], S[+80]	934.128	3	2800.37	2800.36	0	4.5	17	NRagged	676.63	676.63	29.04	10.4	1304	>sp|P02817|AMELX_BOVIN Amelogenin, X isoform OS=Bos taurus OX=9913 GN=AMELX PE=1 SV=2	1	hf1_10472_ebo_24_1_261219.ScanId;v=1;d1=32243.32243.3	controllerType=0 controllerNumber=1 scan=32243	65.7806
44238:3	1	S.M[+15.995]PLPPHPGHPGYINFS[+79.966]YEVLTPLK.W		M[+16], S[+80]	934.13	3	2800.38	2800.36	0	7	17	NRagged	690.65	690.65	21.79	10.63	1304	>sp|P02817|AMELX_BOVIN Amelogenin, X isoform OS=Bos taurus OX=9913 GN=AMELX PE=1 SV=2	1	hf1_10472_ebo_24_1_261219.ScanId;v=1;d1=31871.31871.3	controllerType=0 controllerNumber=1 scan=31871	64.7471
44435:3	1	S.M[+15.995]PLPPHPGHPGYINFS[+79.966]YEVLTPLK.W		M[+16], S[+80]	934.131	3	2800.38	2800.36	0	7.5	17	NRagged	690.74	690.74	14.45	10.63	1304	>sp|P02817|AMELX_BOVIN Amelogenin, X isoform OS=Bos taurus OX=9913 GN=AMELX PE=1 SV=2	1	hf1_10472_ebo_24_1_261219.ScanId;v=1;d1=32024.32024.3	controllerType=0 controllerNumber=1 scan=32024	65.0946
47228:4	1	S.MP[+15.995]LPPHPGHPGYINFS[+79.966]YEVLTPLK.W		P[+16], S[+80]	700.851	4	2800.38	2800.36	0	8.8	17	NRagged	701.07	701.07	4	10.94	1304	>sp|P02817|AMELX_BOVIN Amelogenin, X isoform OS=Bos taurus OX=9913 GN=AMELX PE=1 SV=2	1	hf1_10472_ebo_24_1_261219.ScanId;v=1;d1=34793.34793.4	controllerType=0 controllerNumber=1 scan=34793	73.625
28295:3	1	S.M[+31.990]PLPPHPGHPGYINFS[+79.966]YEVLTPLK.W		M[+32], S[+80]	939.461	3	2816.37	2816.35	0	6	17	NRagged	726.35	726.35	0	11.4	1304	>sp|P02817|AMELX_BOVIN Amelogenin, X isoform OS=Bos taurus OX=9913 GN=AMELX PE=1 SV=2	1	hf1_10472_ebo_24_1_261219.ScanId;v=1;d1=21392.21392.3	controllerType=0 controllerNumber=1 scan=21392	45.8221
27368:4	1	S.M[+15.995]PLPPHPGHPGYINFS[+79.966]YEVLTPLK.W		M[+16], S[+80]	700.849	4	2800.38	2800.36	0	6.6	17	NRagged	729.86	729.86	7.46	11.52	1304	>sp|P02817|AMELX_BOVIN Amelogenin, X isoform OS=Bos taurus OX=9913 GN=AMELX PE=1 SV=2	1	hf1_10472_ebo_24_1_261219.ScanId;v=1;d1=20734.20734.4	controllerType=0 controllerNumber=1 scan=20734	44.6546
27091:4	1	S.MP[+15.995]LPPHPGHPGYINFS[+79.966]YEVLTPLK.W		P[+16], S[+80]	700.848	4	2800.37	2800.36	0	5.1	17	NRagged	746.8	746.8	4	11.28	1304	>sp|P02817|AMELX_BOVIN Amelogenin, X isoform OS=Bos taurus OX=9913 GN=AMELX PE=1 SV=2	1	hf1_10472_ebo_24_1_261219.ScanId;v=1;d1=20533.20533.4	controllerType=0 controllerNumber=1 scan=20533	44.3053
27900:4	1	S.MP[+15.995]LPPHPGHPGYINFS[+79.966]YEVLTPLK.W		P[+16], S[+80]	700.85	4	2800.38	2800.36	0	7.4	17	NRagged	747.08	747.08	4	11.52	1304	>sp|P02817|AMELX_BOVIN Amelogenin, X isoform OS=Bos taurus OX=9913 GN=AMELX PE=1 SV=2	1	hf1_10472_ebo_24_1_261219.ScanId;v=1;d1=21118.21118.4	controllerType=0 controllerNumber=1 scan=21118	45.3349
27124:2	1	S.M[+15.995]PLPPHPGHPGYINFS[+79.966]YEVLTPLK.W		M[+16], S[+80]	1400.69	2	2800.38	2800.36	0	7.5	17	NRagged	760.45	760.45	63.52	12.18	1304	>sp|P02817|AMELX_BOVIN Amelogenin, X isoform OS=Bos taurus OX=9913 GN=AMELX PE=1 SV=2	1	hf1_10472_ebo_24_1_261219.ScanId;v=1;d1=20555.20555.2	controllerType=0 controllerNumber=1 scan=20555	44.3426
26949:3	1	S.M[+15.995]PLPPHPGHPGYINFS[+79.966]YEVLTPLK.W		M[+16], S[+80]	934.125	3	2800.36	2800.36	0	1.8	17	NRagged	762.12	762.12	29.84	11.8	1304	>sp|P02817|AMELX_BOVIN Amelogenin, X isoform OS=Bos taurus OX=9913 GN=AMELX PE=1 SV=2	1	hf1_10472_ebo_24_1_261219.ScanId;v=1;d1=20439.20439.3	controllerType=0 controllerNumber=1 scan=20439	44.1473
27384:2	1	S.M[+15.995]PLPPHPGHPGYINFS[+79.966]YEVLTPLK.W		M[+16], S[+80]	1400.69	2	2800.38	2800.36	0	6.8	17	NRagged	773.5	773.5	51.67	12.18	1304	>sp|P02817|AMELX_BOVIN Amelogenin, X isoform OS=Bos taurus OX=9913 GN=AMELX PE=1 SV=2	1	hf1_10472_ebo_24_1_261219.ScanId;v=1;d1=20749.20749.2	controllerType=0 controllerNumber=1 scan=20749	44.6804
28583:3	1	S.M[+31.990]PLPPHPGHPGYINFS[+79.966]YEVLTPLK.W		M[+32], S[+80]	939.461	3	2816.37	2816.35	0	6.3	17	NRagged	801.03	801.03	0	13.63	1304	>sp|P02817|AMELX_BOVIN Amelogenin, X isoform OS=Bos taurus OX=9913 GN=AMELX PE=1 SV=2	1	hf1_10472_ebo_24_1_261219.ScanId;v=1;d1=21587.21587.3	controllerType=0 controllerNumber=1 scan=21587	46.1688
44953:3	1	S.M[+15.995]PLPPHPGHPGYINFS[+79.966]YEVLTPLK.W		M[+16], S[+80]	934.128	3	2800.37	2800.36	0	4.7	17	NRagged	839.45	839.45	29.45	13.4	1304	>sp|P02817|AMELX_BOVIN Amelogenin, X isoform OS=Bos taurus OX=9913 GN=AMELX PE=1 SV=2	1	hf1_10472_ebo_24_1_261219.ScanId;v=1;d1=32499.32499.3	controllerType=0 controllerNumber=1 scan=32499	66.4713
27651:2	1	S.M[+15.995]PLPPHPGHPGYINFS[+79.966]YEVLTPLK.W		M[+16], S[+80]	1400.69	2	2800.38	2800.36	0	7.4	17	NRagged	856.97	856.97	50.63	14.18	1304	>sp|P02817|AMELX_BOVIN Amelogenin, X isoform OS=Bos taurus OX=9913 GN=AMELX PE=1 SV=2	1	hf1_10472_ebo_24_1_261219.ScanId;v=1;d1=20939.20939.2	controllerType=0 controllerNumber=1 scan=20939	45.0194
29556:3	1	S.M[+15.995]PLPPHPGHPGYINFS[+79.966]YEVLTPLK.W		M[+16], S[+80]	934.128	3	2800.37	2800.36	0	4.1	17	NRagged	872.65	872.65	22.24	14.14	1304	>sp|P02817|AMELX_BOVIN Amelogenin, X isoform OS=Bos taurus OX=9913 GN=AMELX PE=1 SV=2	1	hf1_10472_ebo_24_1_261219.ScanId;v=1;d1=22222.22222.3	controllerType=0 controllerNumber=1 scan=22222	47.2846
26656:3	1	S.M[+15.995]PLPPHPGHPGYINFS[+79.966]YEVLTPLK.W		M[+16], S[+80]	934.13	3	2800.38	2800.36	0	7.1	17	NRagged	895.1	895.1	32.54	14.63	1304	>sp|P02817|AMELX_BOVIN Amelogenin, X isoform OS=Bos taurus OX=9913 GN=AMELX PE=1 SV=2	1	hf1_10472_ebo_24_1_261219.ScanId;v=1;d1=20232.20232.3	controllerType=0 controllerNumber=1 scan=20232	43.785
30244:3	1	S.MPLPPHPGHPGYIN[+0.984]FS[+79.966]YEVLTPLK.W		N[+1], S[+80]	929.125	3	2785.36	2785.35	0	4.8	17	NRagged	911.35	911.35	443.37	15.4	1304	>sp|P02817|AMELX_BOVIN Amelogenin, X isoform OS=Bos taurus OX=9913 GN=AMELX PE=1 SV=2	1	hf1_10472_ebo_24_1_261219.ScanId;v=1;d1=22665.22665.3	controllerType=0 controllerNumber=1 scan=22665	48.0686
29249:3	1	S.M[+15.995]PLPPHPGHPGYINFS[+79.966]YEVLTPLK.W		M[+16], S[+80]	934.127	3	2800.37	2800.36	0	3.7	17	NRagged	961.94	961.94	33.37	16.14	1304	>sp|P02817|AMELX_BOVIN Amelogenin, X isoform OS=Bos taurus OX=9913 GN=AMELX PE=1 SV=2	1	hf1_10472_ebo_24_1_261219.ScanId;v=1;d1=22023.22023.3	controllerType=0 controllerNumber=1 scan=22023	46.9357
27513:3	1	S.M[+15.995]PLPPHPGHPGYINFS[+79.966]YEVLTPLK.W		M[+16], S[+80]	934.13	3	2800.38	2800.36	0	6.9	17	NRagged	1028.02	1028.02	33.38	17.63	1304	>sp|P02817|AMELX_BOVIN Amelogenin, X isoform OS=Bos taurus OX=9913 GN=AMELX PE=1 SV=2	1	hf1_10472_ebo_24_1_261219.ScanId;v=1;d1=20844.20844.3	controllerType=0 controllerNumber=1 scan=20844	44.8497
28061:3	1	S.M[+15.995]PLPPHPGHPGYINFS[+79.966]YEVLTPLK.W		M[+16], S[+80]	934.13	3	2800.38	2800.36	0	6.9	17	NRagged	1067.55	1067.55	43.61	18.63	1304	>sp|P02817|AMELX_BOVIN Amelogenin, X isoform OS=Bos taurus OX=9913 GN=AMELX PE=1 SV=2	1	hf1_10472_ebo_24_1_261219.ScanId;v=1;d1=21235.21235.3	controllerType=0 controllerNumber=1 scan=21235	45.5475
27248:3	1	S.M[+15.995]PLPPHPGHPGYINFS[+79.966]YEVLTPLK.W		M[+16], S[+80]	934.13	3	2800.37	2800.36	0	6.3	17	NRagged	1072.76	1072.76	46.8	18.63	1304	>sp|P02817|AMELX_BOVIN Amelogenin, X isoform OS=Bos taurus OX=9913 GN=AMELX PE=1 SV=2	1	hf1_10472_ebo_24_1_261219.ScanId;v=1;d1=20646.20646.3	controllerType=0 controllerNumber=1 scan=20646	44.503
27792:3	1	S.M[+15.995]PLPPHPGHPGYINFS[+79.966]YEVLTPLK.W		M[+16], S[+80]	934.131	3	2800.38	2800.36	0	7.7	17	NRagged	1084.14	1084.14	75.96	18.63	1304	>sp|P02817|AMELX_BOVIN Amelogenin, X isoform OS=Bos taurus OX=9913 GN=AMELX PE=1 SV=2	1	hf1_10472_ebo_24_1_261219.ScanId;v=1;d1=21043.21043.3	controllerType=0 controllerNumber=1 scan=21043	45.2039
45412:4	1	S.MPLP[+15.995]PHPGHPGY[+31.990]INF[+31.990]SYEVLTPLK.W		F[+32], P[+16], Y[+32]	696.848	4	2784.37	2784.37	0	0.3	17	NRagged	8.53	8.53	0	2.2	1304	>sp|P02817|AMELX_BOVIN Amelogenin, X isoform OS=Bos taurus OX=9913 GN=AMELX PE=1 SV=2	1	hf1_10472_ebo_24_1_261219.ScanId;v=1;d1=32906.32906.4	controllerType=0 controllerNumber=1 scan=32906	67.5581
46716:3	1	S.MP[+15.995]LPPHPGHPGYIN[+0.984]FS[+79.966]YEVLTPLK.W		N[+1], P[+16], S[+80]	934.458	3	2801.36	2801.34	0	6.3	17	NRagged	56.5	56.5	4	3.17	1304	>sp|P02817|AMELX_BOVIN Amelogenin, X isoform OS=Bos taurus OX=9913 GN=AMELX PE=1 SV=2	1	hf1_10472_ebo_24_1_261219.ScanId;v=1;d1=34315.34315.3	controllerType=0 controllerNumber=1 scan=34315	72.3197
44938:4	1	S.MPLPPHPGHP[+31.990]GY[+31.990]INF[+15.995]SYEVLTPLK.W		F[+16], P[+32], Y[+32]	696.849	4	2784.37	2784.37	0	1.6	17	NRagged	61.68	61.68	0	2.24	1304	>sp|P02817|AMELX_BOVIN Amelogenin, X isoform OS=Bos taurus OX=9913 GN=AMELX PE=1 SV=2	1	hf1_10472_ebo_24_1_261219.ScanId;v=1;d1=32484.32484.4	controllerType=0 controllerNumber=1 scan=32484	66.4294
30975:3	1	S.M[+31.990]PLPPHPGHPGYIN[+0.984]FS[+79.966]YEVLTPLK.W		M[+32], N[+1], S[+80]	939.79	3	2817.36	2817.34	0	7	17	NRagged	119.24	114.75	0	2.2	1304	>sp|P02817|AMELX_BOVIN Amelogenin, X isoform OS=Bos taurus OX=9913 GN=AMELX PE=1 SV=2	1	hf1_10472_ebo_24_1_261219.ScanId;v=1;d1=23141.23141.3	controllerType=0 controllerNumber=1 scan=23141	48.9133
27210:4	1	S.MP[+15.995]LPPHPGHP[+31.990]GY[+31.990]INFSYEVLTPLK.W		P[+16][+32], Y[+32]	696.841	4	2784.34	2784.37	0	-9.5	17	NRagged	168.09	168.09	1.31	2.45	1304	>sp|P02817|AMELX_BOVIN Amelogenin, X isoform OS=Bos taurus OX=9913 GN=AMELX PE=1 SV=2	1	hf1_10472_ebo_24_1_261219.ScanId;v=1;d1=20619.20619.4	controllerType=0 controllerNumber=1 scan=20619	44.4548
24951:3	1	S.M[+15.995]PLPPHPGHPGYINFS[+79.966]Y[+15.995]EVLTPLK.W		M[+16], S[+80], Y[+16]	939.458	3	2816.36	2816.35	0	2.6	17	NRagged	182.58	182.58	13.81	3.64	1304	>sp|P02817|AMELX_BOVIN Amelogenin, X isoform OS=Bos taurus OX=9913 GN=AMELX PE=1 SV=2	1	hf1_10472_ebo_24_1_261219.ScanId;v=1;d1=19077.19077.3	controllerType=0 controllerNumber=1 scan=19077	41.7861
41099:3	1	S.MP[+15.995]LPPHPGHPGYIN[+0.984]FS[+79.966]YEVLTPLK.W		N[+1], P[+16], S[+80]	934.457	3	2801.36	2801.34	0	6.2	17	NRagged	297.16	297.16	4	5.83	1304	>sp|P02817|AMELX_BOVIN Amelogenin, X isoform OS=Bos taurus OX=9913 GN=AMELX PE=1 SV=2	1	hf1_10472_ebo_24_1_261219.ScanId;v=1;d1=29802.29802.3	controllerType=0 controllerNumber=1 scan=29802	60.9072
27917:4	1	S.MP[+31.990]LPPHPGHPGYIN[+0.984]FS[+79.966]YEVLTPLK.W		N[+1], P[+32], S[+80]	705.095	4	2817.36	2817.34	0	7.9	17	NRagged	312.24	312.24	8.02	5.56	1304	>sp|P02817|AMELX_BOVIN Amelogenin, X isoform OS=Bos taurus OX=9913 GN=AMELX PE=1 SV=2	1	hf1_10472_ebo_24_1_261219.ScanId;v=1;d1=21133.21133.4	controllerType=0 controllerNumber=1 scan=21133	45.3626
30668:3	1	S.M[+15.995]PLPPHPGH[+15.995]PGYINFS[+79.966]YEVLTPLK.W		H[+16], M[+16], S[+80]	939.456	3	2816.35	2816.35	0	0.8	17	NRagged	319.32	319.32	0.98	5	1304	>sp|P02817|AMELX_BOVIN Amelogenin, X isoform OS=Bos taurus OX=9913 GN=AMELX PE=1 SV=2	1	hf1_10472_ebo_24_1_261219.ScanId;v=1;d1=22941.22941.3	controllerType=0 controllerNumber=1 scan=22941	48.5571
30376:3	1	S.M[+15.995]PLPPHP[+31.990]GHPGYINFS[+79.966]YEVLTPLK.W		M[+16], P[+32], S[+80]	944.79	3	2832.36	2832.35	0	3.6	17	NRagged	386.88	386.88	6.96	6.23	1304	>sp|P02817|AMELX_BOVIN Amelogenin, X isoform OS=Bos taurus OX=9913 GN=AMELX PE=1 SV=2	1	hf1_10472_ebo_24_1_261219.ScanId;v=1;d1=22751.22751.3	controllerType=0 controllerNumber=1 scan=22751	48.2196
30071:3	1	S.MP[+15.995]LPPHP[+15.995]GHPGYINFS[+79.966]YEVLTPLK.W		P[+16]*2, S[+80]	939.46	3	2816.37	2816.35	0	4.9	17	NRagged	411.12	411.12	10.11	6.82	1304	>sp|P02817|AMELX_BOVIN Amelogenin, X isoform OS=Bos taurus OX=9913 GN=AMELX PE=1 SV=2	1	hf1_10472_ebo_24_1_261219.ScanId;v=1;d1=22553.22553.3	controllerType=0 controllerNumber=1 scan=22553	47.8703
29479:2	1	S.MPLPPHPGHP[+31.990]GY[+15.995]INF[+31.990]SYEVLTPLK.W		F[+32], P[+32], Y[+16]	1392.7	2	2784.39	2784.37	0	7.3	17	NRagged	447.7	447.7	0	6.53	1304	>sp|P02817|AMELX_BOVIN Amelogenin, X isoform OS=Bos taurus OX=9913 GN=AMELX PE=1 SV=2	1	hf1_10472_ebo_24_1_261219.ScanId;v=1;d1=22171.22171.2	controllerType=0 controllerNumber=1 scan=22171	47.1942
27916:4	1	S.MP[+15.995]LPPHPGH[+15.995]PGYINFS[+79.966]YEVLTPLK.W		H[+16], P[+16], S[+80]	704.845	4	2816.36	2816.35	0	1.8	17	NRagged	449.4	449.4	0.73	6.08	1304	>sp|P02817|AMELX_BOVIN Amelogenin, X isoform OS=Bos taurus OX=9913 GN=AMELX PE=1 SV=2	1	hf1_10472_ebo_24_1_261219.ScanId;v=1;d1=21133.21133.4	controllerType=0 controllerNumber=1 scan=21133	45.3626
28904:3	1	S.M[+31.990]PLPPHPGHPGYIN[+0.984]FS[+79.966]YEVLTPLK.W		M[+32], N[+1], S[+80]	939.793	3	2817.36	2817.34	0	9.9	17	NRagged	529.21	529.21	9.88	6.57	1304	>sp|P02817|AMELX_BOVIN Amelogenin, X isoform OS=Bos taurus OX=9913 GN=AMELX PE=1 SV=2	1	hf1_10472_ebo_24_1_261219.ScanId;v=1;d1=21798.21798.3	controllerType=0 controllerNumber=1 scan=21798	46.5395
28921:3	1	S.MP[+31.990]LPPHPGHPGYIN[+0.984]FS[+79.966]YEVLTPLK.W		N[+1], P[+32], S[+80]	939.792	3	2817.36	2817.34	0	9	17	NRagged	541.89	541.89	3.48	6.8	1304	>sp|P02817|AMELX_BOVIN Amelogenin, X isoform OS=Bos taurus OX=9913 GN=AMELX PE=1 SV=2	1	hf1_10472_ebo_24_1_261219.ScanId;v=1;d1=21808.21808.3	controllerType=0 controllerNumber=1 scan=21808	46.5574
26811:4	1	S.MP[+15.995]LPPHPGHPGY[+15.995]INFS[+79.966]YEVLTPLK.W		P[+16], S[+80], Y[+16]	704.848	4	2816.37	2816.35	0	6.2	17	NRagged	546.39	546.39	0	7.47	1304	>sp|P02817|AMELX_BOVIN Amelogenin, X isoform OS=Bos taurus OX=9913 GN=AMELX PE=1 SV=2	1	hf1_10472_ebo_24_1_261219.ScanId;v=1;d1=20338.20338.4	controllerType=0 controllerNumber=1 scan=20338	43.9696
47206:4	1	S.MP[+15.995]LPPHPGHP[+15.995]GYINFS[+79.966]YEVLTPLK.W		P[+16]*2, S[+80]	704.848	4	2816.37	2816.35	0	6.9	17	NRagged	558.83	558.83	0	7.71	1304	>sp|P02817|AMELX_BOVIN Amelogenin, X isoform OS=Bos taurus OX=9913 GN=AMELX PE=1 SV=2	1	hf1_10472_ebo_24_1_261219.ScanId;v=1;d1=34776.34776.4	controllerType=0 controllerNumber=1 scan=34776	73.5939
30186:3	1	S.M[+15.995]PLPPHPGHPGYIN[+0.984]FS[+79.966]YEVLTPLK.W		M[+16], N[+1], S[+80]	934.458	3	2801.36	2801.34	0	6.4	17	NRagged	572.41	572.41	8.98	8.63	1304	>sp|P02817|AMELX_BOVIN Amelogenin, X isoform OS=Bos taurus OX=9913 GN=AMELX PE=1 SV=2	1	hf1_10472_ebo_24_1_261219.ScanId;v=1;d1=22627.22627.3	controllerType=0 controllerNumber=1 scan=22627	48.0017
27648:4	1	S.M[+15.995]PLPPHPGHP[+15.995]GYINFS[+79.966]YEVLTPLK.W		M[+16], P[+16], S[+80]	704.846	4	2816.36	2816.35	0	3.4	17	NRagged	595.9	595.9	0.56	8.03	1304	>sp|P02817|AMELX_BOVIN Amelogenin, X isoform OS=Bos taurus OX=9913 GN=AMELX PE=1 SV=2	1	hf1_10472_ebo_24_1_261219.ScanId;v=1;d1=20936.20936.4	controllerType=0 controllerNumber=1 scan=20936	45.0122
27094:4	1	S.MP[+15.995]LPPHPGHP[+15.995]GYINFS[+79.966]YEVLTPLK.W		P[+16]*2, S[+80]	704.848	4	2816.37	2816.35	0	6.1	17	NRagged	630.81	630.81	2	9.28	1304	>sp|P02817|AMELX_BOVIN Amelogenin, X isoform OS=Bos taurus OX=9913 GN=AMELX PE=1 SV=2	1	hf1_10472_ebo_24_1_261219.ScanId;v=1;d1=20536.20536.4	controllerType=0 controllerNumber=1 scan=20536	44.3125
47209:3	1	S.M[+15.995]PLPPHPGHPGY[+15.995]INFS[+79.966]YEVLTPLK.W		M[+16], S[+80], Y[+16]	939.461	3	2816.37	2816.35	0	6.2	17	NRagged	666.5	666.5	10.6	10.4	1304	>sp|P02817|AMELX_BOVIN Amelogenin, X isoform OS=Bos taurus OX=9913 GN=AMELX PE=1 SV=2	1	hf1_10472_ebo_24_1_261219.ScanId;v=1;d1=34779.34779.3	controllerType=0 controllerNumber=1 scan=34779	73.5985
28758:4	1	S.MP[+15.995]LPPHPGHPGYIN[+0.984]FS[+79.966]YEVLTPLK.W		N[+1], P[+16], S[+80]	701.097	4	2801.37	2801.34	0	8.9	17	NRagged	672.15	657.54	5.8	9.94	1304	>sp|P02817|AMELX_BOVIN Amelogenin, X isoform OS=Bos taurus OX=9913 GN=AMELX PE=1 SV=2	1	hf1_10472_ebo_24_1_261219.ScanId;v=1;d1=21704.21704.4	controllerType=0 controllerNumber=1 scan=21704	46.375
27373:4	1	S.M[+15.995]PLPPHPGHP[+15.995]GYINFS[+79.966]YEVLTPLK.W		M[+16], P[+16], S[+80]	704.846	4	2816.36	2816.35	0	3.9	17	NRagged	690.49	690.49	0	10.03	1304	>sp|P02817|AMELX_BOVIN Amelogenin, X isoform OS=Bos taurus OX=9913 GN=AMELX PE=1 SV=2	1	hf1_10472_ebo_24_1_261219.ScanId;v=1;d1=20738.20738.4	controllerType=0 controllerNumber=1 scan=20738	44.6586
28461:4	1	S.MP[+15.995]LPPHPGHPGYIN[+0.984]FS[+79.966]YEVLTPLK.W		N[+1], P[+16], S[+80]	701.097	4	2801.36	2801.34	0	8.4	17	NRagged	713.14	713.14	4	10.94	1304	>sp|P02817|AMELX_BOVIN Amelogenin, X isoform OS=Bos taurus OX=9913 GN=AMELX PE=1 SV=2	1	hf1_10472_ebo_24_1_261219.ScanId;v=1;d1=21506.21506.4	controllerType=0 controllerNumber=1 scan=21506	46.0281
28213:2	1	S.M[+15.995]PLPPHPGHPGYIN[+0.984]FS[+79.966]YEVLTPLK.W		M[+16], N[+1], S[+80]	1401.19	2	2801.37	2801.34	0	9.8	17	NRagged	714.59	668.91	25.26	10.6	1304	>sp|P02817|AMELX_BOVIN Amelogenin, X isoform OS=Bos taurus OX=9913 GN=AMELX PE=1 SV=2	1	hf1_10472_ebo_24_1_261219.ScanId;v=1;d1=21337.21337.2	controllerType=0 controllerNumber=1 scan=21337	45.724
27330:3	1	S.M[+15.995]PLPPHPGHP[+15.995]GYINFS[+79.966]YEVLTPLK.W		M[+16], P[+16], S[+80]	939.46	3	2816.36	2816.35	0	4.4	17	NRagged	831.68	831.68	6.54	13.4	1304	>sp|P02817|AMELX_BOVIN Amelogenin, X isoform OS=Bos taurus OX=9913 GN=AMELX PE=1 SV=2	1	hf1_10472_ebo_24_1_261219.ScanId;v=1;d1=20705.20705.3	controllerType=0 controllerNumber=1 scan=20705	44.6036
30369:3	1	S.M[+15.995]PLPPHP[+15.995]GHPGYINFS[+79.966]YEVLTPLK.W		M[+16], P[+16], S[+80]	939.46	3	2816.36	2816.35	0	4.5	17	NRagged	850.07	850.07	3.95	14.4	1304	>sp|P02817|AMELX_BOVIN Amelogenin, X isoform OS=Bos taurus OX=9913 GN=AMELX PE=1 SV=2	1	hf1_10472_ebo_24_1_261219.ScanId;v=1;d1=22747.22747.3	controllerType=0 controllerNumber=1 scan=22747	48.2136
26926:3	1	S.M[+15.995]PLPPHPGHP[+15.995]GYINFS[+79.966]YEVLTPLK.W		M[+16], P[+16], S[+80]	939.462	3	2816.37	2816.35	0	6.9	17	NRagged	1001.67	1001.67	10.26	17.63	1304	>sp|P02817|AMELX_BOVIN Amelogenin, X isoform OS=Bos taurus OX=9913 GN=AMELX PE=1 SV=2	1	hf1_10472_ebo_24_1_261219.ScanId;v=1;d1=20419.20419.3	controllerType=0 controllerNumber=1 scan=20419	44.1118
28350:3	1	S.M[+15.995]PLPPHPGHPGYIN[+0.984]FS[+79.966]YEVLTPLK.W		M[+16], N[+1], S[+80]	934.46	3	2801.36	2801.34	0	8.4	17	NRagged	1048.2	1048.2	58.23	17.05	1304	>sp|P02817|AMELX_BOVIN Amelogenin, X isoform OS=Bos taurus OX=9913 GN=AMELX PE=1 SV=2	1	hf1_10472_ebo_24_1_261219.ScanId;v=1;d1=21432.21432.3	controllerType=0 controllerNumber=1 scan=21432	45.8947
28642:3	1	S.M[+15.995]PLPPHPGHPGYIN[+0.984]FS[+79.966]YEVLTPLK.W		M[+16], N[+1], S[+80]	934.46	3	2801.37	2801.34	0	8.8	17	NRagged	1101.28	1096.39	64.61	19.05	1304	>sp|P02817|AMELX_BOVIN Amelogenin, X isoform OS=Bos taurus OX=9913 GN=AMELX PE=1 SV=2	1	hf1_10472_ebo_24_1_261219.ScanId;v=1;d1=21627.21627.3	controllerType=0 controllerNumber=1 scan=21627	46.2402
40583:4	1	S.MP[+15.995]LP[+15.995]PHPGHP[+31.990]GYINF[+31.990]SYEVLTPLK.W		F[+32], P[+16]*2[+32]	700.849	4	2800.37	2800.37	0	2.7	17	NRagged	24.03	24.03	0	2.24	1304	>sp|P02817|AMELX_BOVIN Amelogenin, X isoform OS=Bos taurus OX=9913 GN=AMELX PE=1 SV=2	1	hf1_10472_ebo_24_1_261219.ScanId;v=1;d1=29465.29465.4	controllerType=0 controllerNumber=1 scan=29465	60.3037
41322:4	1	S.MP[+15.995]LP[+31.990]P[+31.990]HP[+15.995]GHPGYINFSYEVLTPLK.W		P[+16]*2[+32]*2	700.85	4	2800.38	2800.37	0	4.5	17	NRagged	35.17	35.17	0	2.4	1304	>sp|P02817|AMELX_BOVIN Amelogenin, X isoform OS=Bos taurus OX=9913 GN=AMELX PE=1 SV=2	1	hf1_10472_ebo_24_1_261219.ScanId;v=1;d1=29945.29945.4	controllerType=0 controllerNumber=1 scan=29945	61.163
41637:4	1	S.MP[+15.995]LP[+15.995]P[+31.990]HP[+31.990]GHPGYINFSYEVLTPLK.W		P[+16]*2[+32]*2	700.85	4	2800.38	2800.37	0	4.4	17	NRagged	36.58	36.58	0	2.2	1304	>sp|P02817|AMELX_BOVIN Amelogenin, X isoform OS=Bos taurus OX=9913 GN=AMELX PE=1 SV=2	1	hf1_10472_ebo_24_1_261219.ScanId;v=1;d1=30147.30147.4	controllerType=0 controllerNumber=1 scan=30147	61.5329
27178:3	1	S.MPLPPHPGHP[+31.990]GYIN[+0.984]F[+31.990]SY[+15.995]EVLTPLK.W		F[+32], N[+1], P[+32], Y[+16]	929.124	3	2785.36	2785.35	0	1	17	NRagged	41.7	41.7	0	2.18	1304	>sp|P02817|AMELX_BOVIN Amelogenin, X isoform OS=Bos taurus OX=9913 GN=AMELX PE=1 SV=2	1	hf1_10472_ebo_24_1_261219.ScanId;v=1;d1=20596.20596.3	controllerType=0 controllerNumber=1 scan=20596	44.4152
47431:3	1	S.MP[+15.995]LP[+15.995]PHPGHPGY[+31.990]INF[+31.990]SYEVLTPLK.W		F[+32], P[+16]*2, Y[+32]	934.128	3	2800.37	2800.37	0	1.8	17	NRagged	42.83	42.83	0	2.34	1304	>sp|P02817|AMELX_BOVIN Amelogenin, X isoform OS=Bos taurus OX=9913 GN=AMELX PE=1 SV=2	1	hf1_10472_ebo_24_1_261219.ScanId;v=1;d1=35034.35034.3	controllerType=0 controllerNumber=1 scan=35034	74.6114
40975:4	1	S.MP[+15.995]LP[+15.995]PHPGHPGY[+31.990]INF[+31.990]SYEVLTPLK.W		F[+32], P[+16]*2, Y[+32]	700.848	4	2800.37	2800.37	0	2.1	17	NRagged	64.22	64.22	0	2.51	1304	>sp|P02817|AMELX_BOVIN Amelogenin, X isoform OS=Bos taurus OX=9913 GN=AMELX PE=1 SV=2	1	hf1_10472_ebo_24_1_261219.ScanId;v=1;d1=29720.29720.4	controllerType=0 controllerNumber=1 scan=29720	60.7596
27443:3	1	S.MP[+15.995]LP[+31.990]PHPGHPGYIN[+0.984]F[+31.990]SYEVLTPLK.W		F[+32], N[+1], P[+16][+32]	929.119	3	2785.34	2785.35	0	-4.5	17	NRagged	69.04	69.04	0	1.28	1304	>sp|P02817|AMELX_BOVIN Amelogenin, X isoform OS=Bos taurus OX=9913 GN=AMELX PE=1 SV=2	1	hf1_10472_ebo_24_1_261219.ScanId;v=1;d1=20792.20792.3	controllerType=0 controllerNumber=1 scan=20792	44.7582
47227:5	1	S.MP[+15.995]LPPHPGHPGY[+31.990]INF[+15.995]SY[+31.990]EVLTPLK.W		F[+16], P[+16], Y[+32]*2	560.882	5	2800.38	2800.37	0	5.8	17	NRagged	81	81	0	2.26	1304	>sp|P02817|AMELX_BOVIN Amelogenin, X isoform OS=Bos taurus OX=9913 GN=AMELX PE=1 SV=2	1	hf1_10472_ebo_24_1_261219.ScanId;v=1;d1=34791.34791.5	controllerType=0 controllerNumber=1 scan=34791	73.619
26691:4	1	S.MP[+15.995]LPPHP[+31.990]GH[+15.995]PGYINF[+31.990]SYEVLTPLK.W		F[+32], H[+16], P[+16][+32]	700.85	4	2800.38	2800.37	0	4.2	17	NRagged	109.42	109.42	3.38	2.28	1304	>sp|P02817|AMELX_BOVIN Amelogenin, X isoform OS=Bos taurus OX=9913 GN=AMELX PE=1 SV=2	1	hf1_10472_ebo_24_1_261219.ScanId;v=1;d1=20254.20254.2	controllerType=0 controllerNumber=1 scan=20254	43.8234
43614:4	1	S.MP[+15.995]LP[+15.995]PHPGHP[+31.990]GYINF[+31.990]SYEVLTPLK.W		F[+32], P[+16]*2[+32]	700.85	4	2800.38	2800.37	0	4.8	17	NRagged	110.26	110.26	0	2.68	1304	>sp|P02817|AMELX_BOVIN Amelogenin, X isoform OS=Bos taurus OX=9913 GN=AMELX PE=1 SV=2	1	hf1_10472_ebo_24_1_261219.ScanId;v=1;d1=31440.31440.4	controllerType=0 controllerNumber=1 scan=31440	63.9356
27486:4	1	S.MP[+15.995]LPPHPGHPGY[+31.990]IN[+0.984]F[+31.990]SYEVLTPLK.W		F[+32], N[+1], P[+16], Y[+32]	697.091	4	2785.34	2785.35	0	-4.6	17	NRagged	126.04	126.04	0	2.24	1304	>sp|P02817|AMELX_BOVIN Amelogenin, X isoform OS=Bos taurus OX=9913 GN=AMELX PE=1 SV=2	1	hf1_10472_ebo_24_1_261219.ScanId;v=1;d1=20823.20823.4	controllerType=0 controllerNumber=1 scan=20823	44.8128
28114:3	1	S.MP[+15.995]LPPHPGHPGYIN[+0.984]F[+31.990]SY[+31.990]EVLTPLK.W		F[+32], N[+1], P[+16], Y[+32]	929.122	3	2785.35	2785.35	0	-1	17	NRagged	128.79	128.79	4	2.21	1304	>sp|P02817|AMELX_BOVIN Amelogenin, X isoform OS=Bos taurus OX=9913 GN=AMELX PE=1 SV=2	1	hf1_10472_ebo_24_1_261219.ScanId;v=1;d1=21272.21272.3	controllerType=0 controllerNumber=1 scan=21272	45.6111
27813:3	1	S.MP[+15.995]LPPHPGHP[+31.990]GYIN[+0.984]F[+31.990]SYEVLTPLK.W		F[+32], N[+1], P[+16][+32]	929.125	3	2785.36	2785.35	0	2.5	17	NRagged	128.9	128.9	0	2.31	1304	>sp|P02817|AMELX_BOVIN Amelogenin, X isoform OS=Bos taurus OX=9913 GN=AMELX PE=1 SV=2	1	hf1_10472_ebo_24_1_261219.ScanId;v=1;d1=21059.21059.3	controllerType=0 controllerNumber=1 scan=21059	45.2304
47400:4	1	S.MP[+15.995]LP[+15.995]PHPGHP[+31.990]GYINF[+31.990]SYEVLTPLK.W		F[+32], P[+16]*2[+32]	700.85	4	2800.38	2800.37	0	4.3	17	NRagged	136.3	136.3	0	2.87	1304	>sp|P02817|AMELX_BOVIN Amelogenin, X isoform OS=Bos taurus OX=9913 GN=AMELX PE=1 SV=2	1	hf1_10472_ebo_24_1_261219.ScanId;v=1;d1=34979.34979.4	controllerType=0 controllerNumber=1 scan=34979	74.3408
34763:4	1	S.MP[+15.995]LP[+15.995]PHPGHPGY[+31.990]INF[+31.990]SYEVLTPLK.W		F[+32], P[+16]*2, Y[+32]	700.85	4	2800.38	2800.37	0	4	17	NRagged	144.11	144.11	0	2.79	1304	>sp|P02817|AMELX_BOVIN Amelogenin, X isoform OS=Bos taurus OX=9913 GN=AMELX PE=1 SV=2	1	hf1_10472_ebo_24_1_261219.ScanId;v=1;d1=25683.25683.4	controllerType=0 controllerNumber=1 scan=25683	53.4783
43927:4	1	S.MP[+15.995]LPPHPGHPGY[+31.990]INF[+31.990]SY[+15.995]EVLTPLK.W		F[+32], P[+16], Y[+16][+32]	700.85	4	2800.38	2800.37	0	4.5	17	NRagged	149.58	149.58	0	3	1304	>sp|P02817|AMELX_BOVIN Amelogenin, X isoform OS=Bos taurus OX=9913 GN=AMELX PE=1 SV=2	1	hf1_10472_ebo_24_1_261219.ScanId;v=1;d1=31642.31642.4	controllerType=0 controllerNumber=1 scan=31642	64.2957
30245:3	1	S.MP[+15.995]LPPHPGHPGYIN[+0.984]F[+31.990]SY[+31.990]EVLTPLK.W		F[+32], N[+1], P[+16], Y[+32]	929.125	3	2785.36	2785.35	0	1.9	17	NRagged	151.52	151.52	5.8	2.23	1304	>sp|P02817|AMELX_BOVIN Amelogenin, X isoform OS=Bos taurus OX=9913 GN=AMELX PE=1 SV=2	1	hf1_10472_ebo_24_1_261219.ScanId;v=1;d1=22666.22666.4	controllerType=0 controllerNumber=1 scan=22666	48.0701
27784:5	1	S.MP[+15.995]LPPHPGHP[+31.990]GY[+31.990]INF[+15.995]SYEVLTPLK.W		F[+16], P[+16][+32], Y[+32]	560.881	5	2800.38	2800.37	0	3.8	17	NRagged	183.99	183.99	0	2.93	1304	>sp|P02817|AMELX_BOVIN Amelogenin, X isoform OS=Bos taurus OX=9913 GN=AMELX PE=1 SV=2	1	hf1_10472_ebo_24_1_261219.ScanId;v=1;d1=21036.21036.5	controllerType=0 controllerNumber=1 scan=21036	45.1906
36107:4	1	S.MP[+15.995]LPPHP[+15.995]GHPGY[+31.990]INF[+31.990]SYEVLTPLK.W		F[+32], P[+16]*2, Y[+32]	700.849	4	2800.37	2800.37	0	3.3	17	NRagged	185.06	185.06	0	3.53	1304	>sp|P02817|AMELX_BOVIN Amelogenin, X isoform OS=Bos taurus OX=9913 GN=AMELX PE=1 SV=2	1	hf1_10472_ebo_24_1_261219.ScanId;v=1;d1=26571.26571.4	controllerType=0 controllerNumber=1 scan=26571	55.0957
30551:3	1	S.MPLPPHPGHP[+15.995]GY[+31.990]IN[+0.984]F[+31.990]SYEVLTPLK.W		F[+32], N[+1], P[+16], Y[+32]	929.13	3	2785.37	2785.35	0	7.3	17	NRagged	242.3	242.3	7.11	5.34	1304	>sp|P02817|AMELX_BOVIN Amelogenin, X isoform OS=Bos taurus OX=9913 GN=AMELX PE=1 SV=2	1	hf1_10472_ebo_24_1_261219.ScanId;v=1;d1=22867.22867.3	controllerType=0 controllerNumber=1 scan=22867	48.4239
27488:5	1	S.MP[+15.995]LPPHPGHP[+31.990]GY[+31.990]INF[+15.995]SYEVLTPLK.W		F[+16], P[+16][+32], Y[+32]	560.881	5	2800.38	2800.37	0	4.3	17	NRagged	254.66	254.66	0	4.47	1304	>sp|P02817|AMELX_BOVIN Amelogenin, X isoform OS=Bos taurus OX=9913 GN=AMELX PE=1 SV=2	1	hf1_10472_ebo_24_1_261219.ScanId;v=1;d1=20824.20824.5	controllerType=0 controllerNumber=1 scan=20824	44.8143
27915:2	1	S.M[+15.995]PLPPHPGHP[+31.990]GY[+15.995]INF[+31.990]SYEVLTPLK.W		F[+32], M[+16], P[+32], Y[+16]	1400.7	2	2800.39	2800.37	0	7.4	17	NRagged	555.97	555.97	0	6.51	1304	>sp|P02817|AMELX_BOVIN Amelogenin, X isoform OS=Bos taurus OX=9913 GN=AMELX PE=1 SV=2	1	hf1_10472_ebo_24_1_261219.ScanId;v=1;d1=21132.21132.2	controllerType=0 controllerNumber=1 scan=21132	45.3611
34913:4	1	S.MPLPPHPGHPGYINFS[+79.966]YEVLTPLKW.Y		S[+80]	743.37	4	2970.46	2970.44	0	5.2	17	Non	173.39	173.39	31.72	3.47	1304	>sp|P02817|AMELX_BOVIN Amelogenin, X isoform OS=Bos taurus OX=9913 GN=AMELX PE=1 SV=2	1	hf1_10472_ebo_24_1_261219.ScanId;v=1;d1=25786.25786.4	controllerType=0 controllerNumber=1 scan=25786	53.668
35469:3	1	S.MPLPPHPGHPGYINFS[+79.966]YEVLTPLKW.Y		S[+80]	990.818	3	2970.44	2970.44	0	-0.3	17	Non	299.77	299.77	110.86	4.79	1304	>sp|P02817|AMELX_BOVIN Amelogenin, X isoform OS=Bos taurus OX=9913 GN=AMELX PE=1 SV=2	1	hf1_10472_ebo_24_1_261219.ScanId;v=1;d1=26158.26158.3	controllerType=0 controllerNumber=1 scan=26158	54.3617
34631:4	1	S.MPLPPHPGHPGYINFS[+79.966]YEVLTPLKW.Y		S[+80]	743.371	4	2970.46	2970.44	0	7	17	Non	323.34	323.34	32.37	5.78	1304	>sp|P02817|AMELX_BOVIN Amelogenin, X isoform OS=Bos taurus OX=9913 GN=AMELX PE=1 SV=2	1	hf1_10472_ebo_24_1_261219.ScanId;v=1;d1=25594.25594.4	controllerType=0 controllerNumber=1 scan=25594	53.31
34308:3	1	S.MPLPPHPGHPGYINFS[+79.966]YEVLTPLKW.Y		S[+80]	990.824	3	2970.46	2970.44	0	5.9	17	Non	326.05	326.05	67.15	5.66	1304	>sp|P02817|AMELX_BOVIN Amelogenin, X isoform OS=Bos taurus OX=9913 GN=AMELX PE=1 SV=2	1	hf1_10472_ebo_24_1_261219.ScanId;v=1;d1=25376.25376.3	controllerType=0 controllerNumber=1 scan=25376	52.9181
34603:3	1	S.MPLPPHPGHPGYINFS[+79.966]YEVLTPLKW.Y		S[+80]	990.825	3	2970.46	2970.44	0	6.8	17	Non	742.56	742.56	342.52	11.57	1304	>sp|P02817|AMELX_BOVIN Amelogenin, X isoform OS=Bos taurus OX=9913 GN=AMELX PE=1 SV=2	1	hf1_10472_ebo_24_1_261219.ScanId;v=1;d1=25577.25577.3	controllerType=0 controllerNumber=1 scan=25577	53.2788
34248:4	1	S.MP[+15.995]LPPHPGHPGYINFS[+79.966]YEVLTPLKW.Y		P[+16], S[+80]	747.365	4	2986.44	2986.44	0	0.1	17	Non	153.39	153.39	4	2.44	1304	>sp|P02817|AMELX_BOVIN Amelogenin, X isoform OS=Bos taurus OX=9913 GN=AMELX PE=1 SV=2	1	hf1_10472_ebo_24_1_261219.ScanId;v=1;d1=25338.25338.4	controllerType=0 controllerNumber=1 scan=25338	52.8521
33655:4	1	S.MP[+15.995]LPPHPGHPGYINFS[+79.966]YEVLTPLKW.Y		P[+16], S[+80]	747.37	4	2986.46	2986.44	0	7.6	17	Non	188.49	188.49	4	3.95	1304	>sp|P02817|AMELX_BOVIN Amelogenin, X isoform OS=Bos taurus OX=9913 GN=AMELX PE=1 SV=2	1	hf1_10472_ebo_24_1_261219.ScanId;v=1;d1=24946.24946.4	controllerType=0 controllerNumber=1 scan=24946	52.1467
47193:4	1	S.MP[+15.995]LPPHPGHPGYINFS[+79.966]YEVLTPLKW.Y		P[+16], S[+80]	747.369	4	2986.46	2986.44	0	6.5	17	Non	317.29	317.29	17.64	5.5	1304	>sp|P02817|AMELX_BOVIN Amelogenin, X isoform OS=Bos taurus OX=9913 GN=AMELX PE=1 SV=2	1	hf1_10472_ebo_24_1_261219.ScanId;v=1;d1=34767.34767.4	controllerType=0 controllerNumber=1 scan=34767	73.5776
32834:4	1	S.MP[+15.995]LPPHPGHPGYINFS[+79.966]YEVLTPLKW.Y		P[+16], S[+80]	747.369	4	2986.45	2986.44	0	5.4	17	Non	356.59	356.59	15.12	5.54	1304	>sp|P02817|AMELX_BOVIN Amelogenin, X isoform OS=Bos taurus OX=9913 GN=AMELX PE=1 SV=2	1	hf1_10472_ebo_24_1_261219.ScanId;v=1;d1=24377.24377.4	controllerType=0 controllerNumber=1 scan=24377	51.1075
47225:3	1	S.M[+15.995]PLPPHPGHPGYINFS[+79.966]YEVLTPLKW.Y		M[+16], S[+80]	996.158	3	2986.46	2986.44	0	7.8	17	Non	375.08	375.08	9.41	6.85	1304	>sp|P02817|AMELX_BOVIN Amelogenin, X isoform OS=Bos taurus OX=9913 GN=AMELX PE=1 SV=2	1	hf1_10472_ebo_24_1_261219.ScanId;v=1;d1=34790.34790.3	controllerType=0 controllerNumber=1 scan=34790	73.6175
33107:4	1	S.MP[+15.995]LPPHPGHPGYINFS[+79.966]YEVLTPLKW.Y		P[+16], S[+80]	747.369	4	2986.45	2986.44	0	5.8	17	Non	385.46	385.46	12.41	6.31	1304	>sp|P02817|AMELX_BOVIN Amelogenin, X isoform OS=Bos taurus OX=9913 GN=AMELX PE=1 SV=2	1	hf1_10472_ebo_24_1_261219.ScanId;v=1;d1=24564.24564.4	controllerType=0 controllerNumber=1 scan=24564	51.4461
33376:4	1	S.MP[+15.995]LPPHPGHPGYINFS[+79.966]YEVLTPLKW.Y		P[+16], S[+80]	747.369	4	2986.46	2986.44	0	6.3	17	Non	488.58	488.58	13.59	7.18	1304	>sp|P02817|AMELX_BOVIN Amelogenin, X isoform OS=Bos taurus OX=9913 GN=AMELX PE=1 SV=2	1	hf1_10472_ebo_24_1_261219.ScanId;v=1;d1=24754.24754.4	controllerType=0 controllerNumber=1 scan=24754	51.7911
33055:2	1	S.M[+15.995]PLPPHPGHPGYINFS[+79.966]YEVLTPLKW.Y		M[+16], S[+80]	1493.73	2	2986.46	2986.44	0	7.6	17	Non	646.33	646.33	36.35	8.67	1304	>sp|P02817|AMELX_BOVIN Amelogenin, X isoform OS=Bos taurus OX=9913 GN=AMELX PE=1 SV=2	1	hf1_10472_ebo_24_1_261219.ScanId;v=1;d1=24528.24528.2	controllerType=0 controllerNumber=1 scan=24528	51.3809
32850:3	1	S.M[+15.995]PLPPHPGHPGYINFS[+79.966]YEVLTPLKW.Y		M[+16], S[+80]	996.156	3	2986.45	2986.44	0	5.4	17	Non	859.54	859.54	30.96	14.33	1304	>sp|P02817|AMELX_BOVIN Amelogenin, X isoform OS=Bos taurus OX=9913 GN=AMELX PE=1 SV=2	1	hf1_10472_ebo_24_1_261219.ScanId;v=1;d1=24388.24388.3	controllerType=0 controllerNumber=1 scan=24388	51.1263
33127:3	1	S.M[+15.995]PLPPHPGHPGYINFS[+79.966]YEVLTPLKW.Y		M[+16], S[+80]	996.156	3	2986.45	2986.44	0	5.7	17	Non	963.51	963.51	30.94	16.33	1304	>sp|P02817|AMELX_BOVIN Amelogenin, X isoform OS=Bos taurus OX=9913 GN=AMELX PE=1 SV=2	1	hf1_10472_ebo_24_1_261219.ScanId;v=1;d1=24578.24578.3	controllerType=0 controllerNumber=1 scan=24578	51.4726
33396:3	1	S.M[+15.995]PLPPHPGHPGYINFS[+79.966]YEVLTPLKW.Y		M[+16], S[+80]	996.157	3	2986.46	2986.44	0	7.2	17	Non	969.17	969.17	34.73	16.57	1304	>sp|P02817|AMELX_BOVIN Amelogenin, X isoform OS=Bos taurus OX=9913 GN=AMELX PE=1 SV=2	1	hf1_10472_ebo_24_1_261219.ScanId;v=1;d1=24769.24769.3	controllerType=0 controllerNumber=1 scan=24769	51.822
32765:4	1	S.M[+15.995]PLPPHPGHPGY[+15.995]INFS[+79.966]YEVLTPLKW.Y		M[+16], S[+80], Y[+16]	751.367	4	3002.45	3002.43	0	5.4	17	Non	70.2	70.2	0	2.23	1304	>sp|P02817|AMELX_BOVIN Amelogenin, X isoform OS=Bos taurus OX=9913 GN=AMELX PE=1 SV=2	1	hf1_10472_ebo_24_1_261219.ScanId;v=1;d1=24327.24327.4	controllerType=0 controllerNumber=1 scan=24327	51.0178
34340:4	1	S.MPLPPHPGHP[+31.990]GYINF[+31.990]SY[+15.995]EVLTPLKW.Y		F[+32], P[+32], Y[+16]	743.37	4	2970.46	2970.45	0	3.2	17	Non	107.84	107.84	0	2.37	1304	>sp|P02817|AMELX_BOVIN Amelogenin, X isoform OS=Bos taurus OX=9913 GN=AMELX PE=1 SV=2	1	hf1_10472_ebo_24_1_261219.ScanId;v=1;d1=25399.25399.4	controllerType=0 controllerNumber=1 scan=25399	52.9613
29646:4	1	S.M[+15.995]PLPPHPGHPGYINFS[+79.966]YEVLTPLKW[+15.995].Y		M[+16], S[+80], W[+16]	751.368	4	3002.45	3002.43	0	6.1	17	Non	123.46	113.61	0.65	1.48	1304	>sp|P02817|AMELX_BOVIN Amelogenin, X isoform OS=Bos taurus OX=9913 GN=AMELX PE=1 SV=2	1	hf1_10472_ebo_24_1_261219.ScanId;v=1;d1=22280.22280.4	controllerType=0 controllerNumber=1 scan=22280	47.386
35193:4	1	S.MP[+15.995]LPPHPGHPGYINF[+31.990]SY[+31.990]EVLTPLKW.Y		F[+32], P[+16], Y[+32]	743.363	4	2970.43	2970.45	0	-6.3	17	Non	153.07	153.07	3.21	1.68	1304	>sp|P02817|AMELX_BOVIN Amelogenin, X isoform OS=Bos taurus OX=9913 GN=AMELX PE=1 SV=2	1	hf1_10472_ebo_24_1_261219.ScanId;v=1;d1=25972.25972.4	controllerType=0 controllerNumber=1 scan=25972	54.0135
32480:4	1	S.M[+15.995]PLPPHPGHP[+15.995]GYINFS[+79.966]YEVLTPLKW.Y		M[+16], P[+16], S[+80]	751.368	4	3002.45	3002.43	0	6.5	17	Non	170.83	170.83	0	3.7	1304	>sp|P02817|AMELX_BOVIN Amelogenin, X isoform OS=Bos taurus OX=9913 GN=AMELX PE=1 SV=2	1	hf1_10472_ebo_24_1_261219.ScanId;v=1;d1=24133.24133.4	controllerType=0 controllerNumber=1 scan=24133	50.6726
31721:4	1	S.M[+15.995]PLPPHPGHPGYINFS[+79.966]YEVLTPLKW[+15.995].Y		M[+16], S[+80], W[+16]	751.365	4	3002.44	3002.43	0	3	17	Non	193.99	175.56	4.14	3.23	1304	>sp|P02817|AMELX_BOVIN Amelogenin, X isoform OS=Bos taurus OX=9913 GN=AMELX PE=1 SV=2	1	hf1_10472_ebo_24_1_261219.ScanId;v=1;d1=23629.23629.4	controllerType=0 controllerNumber=1 scan=23629	49.7723
31268:4	1	S.MP[+15.995]LPPHPGHPGYINFS[+79.966]YEVLTPLKW[+31.990].Y		P[+16], S[+80], W[+32]	755.366	4	3018.44	3018.43	0	5.3	17	Non	249.85	249.85	4	4.92	1304	>sp|P02817|AMELX_BOVIN Amelogenin, X isoform OS=Bos taurus OX=9913 GN=AMELX PE=1 SV=2	1	hf1_10472_ebo_24_1_261219.ScanId;v=1;d1=23333.23333.4	controllerType=0 controllerNumber=1 scan=23333	49.2517
29540:3	1	S.MP[+15.995]LPPHPGHPGYINFS[+79.966]YEVLTPLKW[+31.990].Y		P[+16], S[+80], W[+32]	1006.82	3	3018.44	3018.43	0	4.4	17	Non	267.39	267.39	4	4.78	1304	>sp|P02817|AMELX_BOVIN Amelogenin, X isoform OS=Bos taurus OX=9913 GN=AMELX PE=1 SV=2	1	hf1_10472_ebo_24_1_261219.ScanId;v=1;d1=22212.22212.3	controllerType=0 controllerNumber=1 scan=22212	47.2667
30757:4	1	S.M[+15.995]PLPPHPGHPGYINFS[+79.966]YEVLTPLKW[+15.995].Y		M[+16], S[+80], W[+16]	751.368	4	3002.45	3002.43	0	6	17	Non	270.59	270.59	5.23	4.66	1304	>sp|P02817|AMELX_BOVIN Amelogenin, X isoform OS=Bos taurus OX=9913 GN=AMELX PE=1 SV=2	1	hf1_10472_ebo_24_1_261219.ScanId;v=1;d1=23001.23001.4	controllerType=0 controllerNumber=1 scan=23001	48.6666
32464:3	1	S.M[+15.995]PLPPHPGHPGY[+15.995]INFS[+79.966]YEVLTPLKW.Y		M[+16], S[+80], Y[+16]	1001.49	3	3002.45	3002.43	0	7.8	17	Non	295.17	295.17	9.3	5.6	1304	>sp|P02817|AMELX_BOVIN Amelogenin, X isoform OS=Bos taurus OX=9913 GN=AMELX PE=1 SV=2	1	hf1_10472_ebo_24_1_261219.ScanId;v=1;d1=24122.24122.3	controllerType=0 controllerNumber=1 scan=24122	50.6533
31066:4	1	S.M[+15.995]PLPPHPGHPGYINFS[+79.966]YEVLTPLKW[+15.995].Y		M[+16], S[+80], W[+16]	751.368	4	3002.45	3002.43	0	6.4	17	Non	303.45	303.45	5.55	5.49	1304	>sp|P02817|AMELX_BOVIN Amelogenin, X isoform OS=Bos taurus OX=9913 GN=AMELX PE=1 SV=2	1	hf1_10472_ebo_24_1_261219.ScanId;v=1;d1=23201.23201.4	controllerType=0 controllerNumber=1 scan=23201	49.0224
31378:4	1	S.M[+15.995]PLPPHPGHPGYINFS[+79.966]YEVLTPLKW[+15.995].Y		M[+16], S[+80], W[+16]	751.367	4	3002.45	3002.43	0	5.1	17	Non	307.07	307.07	3.02	5.25	1304	>sp|P02817|AMELX_BOVIN Amelogenin, X isoform OS=Bos taurus OX=9913 GN=AMELX PE=1 SV=2	1	hf1_10472_ebo_24_1_261219.ScanId;v=1;d1=23402.23402.4	controllerType=0 controllerNumber=1 scan=23402	49.3715
33953:4	1	S.MP[+15.995]LPPHPGHPGYIN[+0.984]FS[+79.966]YEVLTPLKW.Y		N[+1], P[+16], S[+80]	747.616	4	2987.44	2987.42	0	6.9	17	Non	316.9	246.9	11.22	5.5	1304	>sp|P02817|AMELX_BOVIN Amelogenin, X isoform OS=Bos taurus OX=9913 GN=AMELX PE=1 SV=2	1	hf1_10472_ebo_24_1_261219.ScanId;v=1;d1=25140.25140.4	controllerType=0 controllerNumber=1 scan=25140	52.4913
30564:3	1	S.MP[+15.995]LPPHPGHPGYINFS[+79.966]YEVLTPLKW[+15.995].Y		P[+16], S[+80], W[+16]	1001.49	3	3002.45	3002.43	0	5.8	17	Non	388.32	388.32	2	6.42	1304	>sp|P02817|AMELX_BOVIN Amelogenin, X isoform OS=Bos taurus OX=9913 GN=AMELX PE=1 SV=2	1	hf1_10472_ebo_24_1_261219.ScanId;v=1;d1=22875.22875.3	controllerType=0 controllerNumber=1 scan=22875	48.4387
31787:3	1	S.M[+15.995]PLPPHPGHPGYINFS[+79.966]YEVLTPLKW[+15.995].Y		M[+16], S[+80], W[+16]	1001.48	3	3002.44	3002.43	0	2.2	17	Non	424.74	424.74	8.19	5.94	1304	>sp|P02817|AMELX_BOVIN Amelogenin, X isoform OS=Bos taurus OX=9913 GN=AMELX PE=1 SV=2	1	hf1_10472_ebo_24_1_261219.ScanId;v=1;d1=23675.23675.3	controllerType=0 controllerNumber=1 scan=23675	49.8572
31210:3	1	S.MP[+15.995]LPPHPGHPGYINFS[+79.966]YEVLTPLKW[+31.990].Y		P[+16], S[+80], W[+32]	1006.81	3	3018.42	3018.43	0	-0.7	17	Non	426.77	426.77	4	6.03	1304	>sp|P02817|AMELX_BOVIN Amelogenin, X isoform OS=Bos taurus OX=9913 GN=AMELX PE=1 SV=2	1	hf1_10472_ebo_24_1_261219.ScanId;v=1;d1=23297.23297.3	controllerType=0 controllerNumber=1 scan=23297	49.1866
32753:3	1	S.M[+15.995]PLPPHPGHPGY[+15.995]INFS[+79.966]YEVLTPLKW.Y		M[+16], S[+80], Y[+16]	1001.49	3	3002.45	3002.43	0	4.8	17	Non	492.66	492.66	13.23	7.5	1304	>sp|P02817|AMELX_BOVIN Amelogenin, X isoform OS=Bos taurus OX=9913 GN=AMELX PE=1 SV=2	1	hf1_10472_ebo_24_1_261219.ScanId;v=1;d1=24317.24317.3	controllerType=0 controllerNumber=1 scan=24317	51.0005
30859:3	1	S.M[+15.995]PLPPHPGHPGYINFS[+79.966]YEVLTPLKW[+15.995].Y		M[+16], S[+80], W[+16]	1001.49	3	3002.45	3002.43	0	5.3	17	Non	591.87	591.87	11.1	8.33	1304	>sp|P02817|AMELX_BOVIN Amelogenin, X isoform OS=Bos taurus OX=9913 GN=AMELX PE=1 SV=2	1	hf1_10472_ebo_24_1_261219.ScanId;v=1;d1=23066.23066.3	controllerType=0 controllerNumber=1 scan=23066	48.781
31456:3	1	S.M[+15.995]PLPPHPGHPGYINFS[+79.966]YEVLTPLKW[+15.995].Y		M[+16], S[+80], W[+16]	1001.49	3	3002.44	3002.43	0	4.2	17	Non	704.2	704.2	14.2	11.33	1304	>sp|P02817|AMELX_BOVIN Amelogenin, X isoform OS=Bos taurus OX=9913 GN=AMELX PE=1 SV=2	1	hf1_10472_ebo_24_1_261219.ScanId;v=1;d1=23455.23455.3	controllerType=0 controllerNumber=1 scan=23455	49.4649
31149:3	1	S.M[+15.995]PLPPHPGHPGYINFS[+79.966]YEVLTPLKW[+15.995].Y		M[+16], S[+80], W[+16]	1001.49	3	3002.44	3002.43	0	4.1	17	Non	709.22	709.22	10.1	11.08	1304	>sp|P02817|AMELX_BOVIN Amelogenin, X isoform OS=Bos taurus OX=9913 GN=AMELX PE=1 SV=2	1	hf1_10472_ebo_24_1_261219.ScanId;v=1;d1=23256.23256.3	controllerType=0 controllerNumber=1 scan=23256	49.1181
33782:3	1	S.M[+15.995]PLPPHPGHPGYIN[+0.984]FS[+79.966]YEVLTPLKW.Y		M[+16], N[+1], S[+80]	996.485	3	2987.44	2987.42	0	7	17	Non	743.38	476.48	26.74	11.57	1304	>sp|P02817|AMELX_BOVIN Amelogenin, X isoform OS=Bos taurus OX=9913 GN=AMELX PE=1 SV=2	1	hf1_10472_ebo_24_1_261219.ScanId;v=1;d1=25030.25030.3	controllerType=0 controllerNumber=1 scan=25030	52.2959
34071:3	1	S.M[+15.995]PLPPHPGHPGYIN[+0.984]FS[+79.966]YEVLTPLKW.Y		M[+16], N[+1], S[+80]	996.485	3	2987.44	2987.42	0	6.7	17	Non	901.72	624.89	34.31	15.57	1304	>sp|P02817|AMELX_BOVIN Amelogenin, X isoform OS=Bos taurus OX=9913 GN=AMELX PE=1 SV=2	1	hf1_10472_ebo_24_1_261219.ScanId;v=1;d1=25223.25223.3	controllerType=0 controllerNumber=1 scan=25223	52.6494
31601:4	1	S.MP[+15.995]LPPHPGHPGYIN[+0.984]FS[+79.966]YEVLTPLKW[+31.990].Y		N[+1], P[+16], S[+80], W[+32]	755.613	4	3019.43	3019.41	0	6.8	17	Non	51.56	35.14	4	1.25	1304	>sp|P02817|AMELX_BOVIN Amelogenin, X isoform OS=Bos taurus OX=9913 GN=AMELX PE=1 SV=2	1	hf1_10472_ebo_24_1_261219.ScanId;v=1;d1=23551.23551.4	controllerType=0 controllerNumber=1 scan=23551	49.6302
32930:3	1	S.M[+15.995]PLPPHPGHP[+15.995]GY[+31.990]INFSY[+31.990]EVLTPLKW.Y		M[+16], P[+16], Y[+32]*2	996.155	3	2986.45	2986.44	0	2.6	17	Non	131.27	131.27	0	1.72	1304	>sp|P02817|AMELX_BOVIN Amelogenin, X isoform OS=Bos taurus OX=9913 GN=AMELX PE=1 SV=2	1	hf1_10472_ebo_24_1_261219.ScanId;v=1;d1=24445.24445.3	controllerType=0 controllerNumber=1 scan=24445	51.2306
28722:4	1	S.MP[+15.995]LPPHPGHPGYINFSYEVLTPLKWY.Q		P[+16]	768.143	4	3069.55	3069.53	0	5.7	17	Non	152.57	152.57	4	2.63	1304	>sp|P02817|AMELX_BOVIN Amelogenin, X isoform OS=Bos taurus OX=9913 GN=AMELX PE=1 SV=2	1	hf1_10472_ebo_24_1_261219.ScanId;v=1;d1=21679.21679.4	controllerType=0 controllerNumber=1 scan=21679	46.3288
32585:4	1	S.MP[+15.995]LPPHPGHPGYINFSYEVLTPLKWY.Q		P[+16]	768.142	4	3069.55	3069.53	0	4.2	17	Non	190.76	190.76	5.5	3.72	1304	>sp|P02817|AMELX_BOVIN Amelogenin, X isoform OS=Bos taurus OX=9913 GN=AMELX PE=1 SV=2	1	hf1_10472_ebo_24_1_261219.ScanId;v=1;d1=24200.24200.2	controllerType=0 controllerNumber=1 scan=24200	50.7919
32842:4	1	S.MP[+15.995]LPPHPGHPGYINFSYEVLTPLKWY.Q		P[+16]	768.139	4	3069.53	3069.53	0	0.4	17	Non	267.17	267.17	4	4.49	1304	>sp|P02817|AMELX_BOVIN Amelogenin, X isoform OS=Bos taurus OX=9913 GN=AMELX PE=1 SV=2	1	hf1_10472_ebo_24_1_261219.ScanId;v=1;d1=24382.24382.5	controllerType=0 controllerNumber=1 scan=24382	51.115
35490:4	1	S.MPLPPHPGHPGYINFS[+79.966]YEVLTPLKWY.Q		S[+80]	784.137	4	3133.53	3133.5	0	6.7	17	Non	321.18	321.18	77.04	5.78	1304	>sp|P02817|AMELX_BOVIN Amelogenin, X isoform OS=Bos taurus OX=9913 GN=AMELX PE=1 SV=2	1	hf1_10472_ebo_24_1_261219.ScanId;v=1;d1=26171.26171.4	controllerType=0 controllerNumber=1 scan=26171	54.3843
32695:4	1	S.MP[+15.995]LPPHPGHPGYINFSYEVLTPLKWY.Q		P[+16]	768.14	4	3069.54	3069.53	0	2.3	17	Non	347.98	347.98	5.5	5.29	1304	>sp|P02817|AMELX_BOVIN Amelogenin, X isoform OS=Bos taurus OX=9913 GN=AMELX PE=1 SV=2	1	hf1_10472_ebo_24_1_261219.ScanId;v=1;d1=24276.24276.4	controllerType=0 controllerNumber=1 scan=24276	50.9267
35791:4	1	S.MPLPPHPGHPGYINFS[+79.966]YEVLTPLKWY.Q		S[+80]	784.137	4	3133.53	3133.5	0	6.6	17	Non	352.2	352.2	17.03	5.78	1304	>sp|P02817|AMELX_BOVIN Amelogenin, X isoform OS=Bos taurus OX=9913 GN=AMELX PE=1 SV=2	1	hf1_10472_ebo_24_1_261219.ScanId;v=1;d1=26371.26371.4	controllerType=0 controllerNumber=1 scan=26371	54.741
32350:4	1	S.MP[+15.995]LPPHPGHPGYINFSYEVLTPLKWY.Q		P[+16]	768.143	4	3069.55	3069.53	0	6.1	17	Non	459.83	459.83	5.5	6.83	1304	>sp|P02817|AMELX_BOVIN Amelogenin, X isoform OS=Bos taurus OX=9913 GN=AMELX PE=1 SV=2	1	hf1_10472_ebo_24_1_261219.ScanId;v=1;d1=24049.24049.4	controllerType=0 controllerNumber=1 scan=24049	50.5269
35467:3	1	S.MPLPPHPGHPGYINFS[+79.966]YEVLTPLKWY.Q		S[+80]	1045.18	3	3133.52	3133.5	0	6.3	17	Non	507.82	507.82	223.86	7.74	1304	>sp|P02817|AMELX_BOVIN Amelogenin, X isoform OS=Bos taurus OX=9913 GN=AMELX PE=1 SV=2	1	hf1_10472_ebo_24_1_261219.ScanId;v=1;d1=26157.26157.3	controllerType=0 controllerNumber=1 scan=26157	54.3602
35759:3	1	S.MPLPPHPGHPGYINFS[+79.966]YEVLTPLKWY.Q		S[+80]	1045.18	3	3133.52	3133.5	0	6.2	17	Non	926.32	926.32	363.99	15.33	1304	>sp|P02817|AMELX_BOVIN Amelogenin, X isoform OS=Bos taurus OX=9913 GN=AMELX PE=1 SV=2	1	hf1_10472_ebo_24_1_261219.ScanId;v=1;d1=26350.26350.3	controllerType=0 controllerNumber=1 scan=26350	54.7036
42517:3	1	S.MP[+15.995]LPPHPGHPGYINFS[+79.966]YEVLTPLKWY.Q		P[+16], S[+80]	1050.51	3	3149.52	3149.5	0	5.9	17	Non	25.58	25.58	4	2.2	1304	>sp|P02817|AMELX_BOVIN Amelogenin, X isoform OS=Bos taurus OX=9913 GN=AMELX PE=1 SV=2	1	hf1_10472_ebo_24_1_261219.ScanId;v=1;d1=30725.30725.3	controllerType=0 controllerNumber=1 scan=30725	62.585
42217:3	1	S.MP[+15.995]LPPHPGHPGYINFS[+79.966]YEVLTPLKWY.Q		P[+16], S[+80]	1050.51	3	3149.52	3149.5	0	7.8	17	Non	47.66	47.66	4	2.58	1304	>sp|P02817|AMELX_BOVIN Amelogenin, X isoform OS=Bos taurus OX=9913 GN=AMELX PE=1 SV=2	1	hf1_10472_ebo_24_1_261219.ScanId;v=1;d1=30532.30532.3	controllerType=0 controllerNumber=1 scan=30532	62.2331
42795:3	1	S.MP[+15.995]LPPHPGHPGYINFS[+79.966]YEVLTPLKWY.Q		P[+16], S[+80]	1050.51	3	3149.52	3149.5	0	8	17	Non	50.43	50.43	4	2.58	1304	>sp|P02817|AMELX_BOVIN Amelogenin, X isoform OS=Bos taurus OX=9913 GN=AMELX PE=1 SV=2	1	hf1_10472_ebo_24_1_261219.ScanId;v=1;d1=30915.30915.3	controllerType=0 controllerNumber=1 scan=30915	62.9348
44437:4	1	S.MP[+15.995]LPPHPGHPGYINFS[+79.966]YEVLTPLKWY.Q		P[+16], S[+80]	788.135	4	3149.52	3149.5	0	6.2	17	Non	61.53	61.53	4	2.28	1304	>sp|P02817|AMELX_BOVIN Amelogenin, X isoform OS=Bos taurus OX=9913 GN=AMELX PE=1 SV=2	1	hf1_10472_ebo_24_1_261219.ScanId;v=1;d1=32027.32027.4	controllerType=0 controllerNumber=1 scan=32027	65.1024
40959:3	1	S.MP[+15.995]LPPHPGHPGYINFS[+79.966]YEVLTPLKWY.Q		P[+16], S[+80]	1050.51	3	3149.52	3149.5	0	5.5	17	Non	91.36	91.36	4	2.55	1304	>sp|P02817|AMELX_BOVIN Amelogenin, X isoform OS=Bos taurus OX=9913 GN=AMELX PE=1 SV=2	1	hf1_10472_ebo_24_1_261219.ScanId;v=1;d1=29710.29710.3	controllerType=0 controllerNumber=1 scan=29710	60.7416
34158:5	1	S.MP[+15.995]LPPHPGHPGYINFS[+79.966]YEVLTPLKWY.Q		P[+16], S[+80]	630.71	5	3149.52	3149.5	0	5.9	17	Non	96.67	96.67	4	2.25	1304	>sp|P02817|AMELX_BOVIN Amelogenin, X isoform OS=Bos taurus OX=9913 GN=AMELX PE=1 SV=2	1	hf1_10472_ebo_24_1_261219.ScanId;v=1;d1=25275.25275.5	controllerType=0 controllerNumber=1 scan=25275	52.7387
41922:3	1	S.MP[+15.995]LPPHPGHPGYINFS[+79.966]YEVLTPLKWY.Q		P[+16], S[+80]	1050.51	3	3149.53	3149.5	0	8.8	17	Non	98.62	98.62	4	2.5	1304	>sp|P02817|AMELX_BOVIN Amelogenin, X isoform OS=Bos taurus OX=9913 GN=AMELX PE=1 SV=2	1	hf1_10472_ebo_24_1_261219.ScanId;v=1;d1=30336.30336.3	controllerType=0 controllerNumber=1 scan=30336	61.8776
38095:4	1	S.MP[+15.995]LPPHPGHPGYINFS[+79.966]YEVLTPLKWY.Q		P[+16], S[+80]	788.137	4	3149.53	3149.5	0	8.5	17	Non	109.42	109.42	4	2.33	1304	>sp|P02817|AMELX_BOVIN Amelogenin, X isoform OS=Bos taurus OX=9913 GN=AMELX PE=1 SV=2	1	hf1_10472_ebo_24_1_261219.ScanId;v=1;d1=27850.27850.4	controllerType=0 controllerNumber=1 scan=27850	57.4013
39389:3	1	S.M[+15.995]PLPPHPGHPGYINFS[+79.966]YEVLTPLKWY.Q		M[+16], S[+80]	1050.51	3	3149.51	3149.5	0	3.9	17	Non	113.47	113.47	12.24	2.41	1304	>sp|P02817|AMELX_BOVIN Amelogenin, X isoform OS=Bos taurus OX=9913 GN=AMELX PE=1 SV=2	1	hf1_10472_ebo_24_1_261219.ScanId;v=1;d1=28687.28687.5	controllerType=0 controllerNumber=1 scan=28687	58.9129
43421:4	1	S.MP[+15.995]LPPHPGHPGYINFS[+79.966]YEVLTPLKWY.Q		P[+16], S[+80]	788.137	4	3149.53	3149.5	0	8.4	17	Non	114.67	114.67	2.42	2.33	1304	>sp|P02817|AMELX_BOVIN Amelogenin, X isoform OS=Bos taurus OX=9913 GN=AMELX PE=1 SV=2	1	hf1_10472_ebo_24_1_261219.ScanId;v=1;d1=31319.31319.4	controllerType=0 controllerNumber=1 scan=31319	63.7177
36451:4	1	S.MP[+15.995]LPPHPGHPGYINFS[+79.966]YEVLTPLKWY.Q		P[+16], S[+80]	788.134	4	3149.52	3149.5	0	5	17	Non	142.36	142.36	4	2.34	1304	>sp|P02817|AMELX_BOVIN Amelogenin, X isoform OS=Bos taurus OX=9913 GN=AMELX PE=1 SV=2	1	hf1_10472_ebo_24_1_261219.ScanId;v=1;d1=26792.26792.4	controllerType=0 controllerNumber=1 scan=26792	55.4956
37767:3	1	S.MP[+15.995]LPPHPGHPGYINFS[+79.966]YEVLTPLKWY.Q		P[+16], S[+80]	1050.51	3	3149.51	3149.5	0	3	17	Non	158.17	158.17	4	2.71	1304	>sp|P02817|AMELX_BOVIN Amelogenin, X isoform OS=Bos taurus OX=9913 GN=AMELX PE=1 SV=2	1	hf1_10472_ebo_24_1_261219.ScanId;v=1;d1=27645.27645.3	controllerType=0 controllerNumber=1 scan=27645	57.036
43347:3	1	S.M[+15.995]PLPPHPGHPGYINFS[+79.966]YEVLTPLKWY.Q		M[+16], S[+80]	1050.51	3	3149.52	3149.5	0	6.6	17	Non	161.1	161.1	12.78	4.06	1304	>sp|P02817|AMELX_BOVIN Amelogenin, X isoform OS=Bos taurus OX=9913 GN=AMELX PE=1 SV=2	1	hf1_10472_ebo_24_1_261219.ScanId;v=1;d1=31275.31275.3	controllerType=0 controllerNumber=1 scan=31275	63.6349
43072:3	1	S.MP[+15.995]LPPHPGHPGYINFS[+79.966]YEVLTPLKWY.Q		P[+16], S[+80]	1050.51	3	3149.52	3149.5	0	7.4	17	Non	166.14	166.14	4	4.22	1304	>sp|P02817|AMELX_BOVIN Amelogenin, X isoform OS=Bos taurus OX=9913 GN=AMELX PE=1 SV=2	1	hf1_10472_ebo_24_1_261219.ScanId;v=1;d1=31093.31093.3	controllerType=0 controllerNumber=1 scan=31093	63.2773
40291:3	1	S.MP[+15.995]LPPHPGHPGYINFS[+79.966]YEVLTPLKWY.Q		P[+16], S[+80]	1050.51	3	3149.52	3149.5	0	7.5	17	Non	171.52	171.52	4	2.6	1304	>sp|P02817|AMELX_BOVIN Amelogenin, X isoform OS=Bos taurus OX=9913 GN=AMELX PE=1 SV=2	1	hf1_10472_ebo_24_1_261219.ScanId;v=1;d1=29277.29277.5	controllerType=0 controllerNumber=1 scan=29277	59.9689
36144:4	1	S.MP[+15.995]LPPHPGHPGYINFS[+79.966]YEVLTPLKWY.Q		P[+16], S[+80]	788.135	4	3149.52	3149.5	0	5.7	17	Non	175.3	175.3	4	3.72	1304	>sp|P02817|AMELX_BOVIN Amelogenin, X isoform OS=Bos taurus OX=9913 GN=AMELX PE=1 SV=2	1	hf1_10472_ebo_24_1_261219.ScanId;v=1;d1=26596.26596.4	controllerType=0 controllerNumber=1 scan=26596	55.1422
35826:4	1	S.MP[+15.995]LPPHPGHPGYINFS[+79.966]YEVLTPLKWY.Q		P[+16], S[+80]	788.135	4	3149.52	3149.5	0	5.4	17	Non	214.5	214.5	4	3.67	1304	>sp|P02817|AMELX_BOVIN Amelogenin, X isoform OS=Bos taurus OX=9913 GN=AMELX PE=1 SV=2	1	hf1_10472_ebo_24_1_261219.ScanId;v=1;d1=26395.26395.4	controllerType=0 controllerNumber=1 scan=26395	54.783
36135:3	1	S.MP[+15.995]LPPHPGHPGYINFS[+79.966]YEVLTPLKWY.Q		P[+16], S[+80]	1050.51	3	3149.53	3149.5	0	8.2	17	Non	219.32	219.32	4	3.7	1304	>sp|P02817|AMELX_BOVIN Amelogenin, X isoform OS=Bos taurus OX=9913 GN=AMELX PE=1 SV=2	1	hf1_10472_ebo_24_1_261219.ScanId;v=1;d1=26590.26590.3	controllerType=0 controllerNumber=1 scan=26590	55.1302
47177:4	1	S.MP[+15.995]LPPHPGHPGYINFS[+79.966]YEVLTPLKWY.Q		P[+16], S[+80]	788.137	4	3149.52	3149.5	0	8	17	Non	234	234	4	3.9	1304	>sp|P02817|AMELX_BOVIN Amelogenin, X isoform OS=Bos taurus OX=9913 GN=AMELX PE=1 SV=2	1	hf1_10472_ebo_24_1_261219.ScanId;v=1;d1=34754.34754.4	controllerType=0 controllerNumber=1 scan=34754	73.5552
41007:3	1	S.M[+15.995]PLPPHPGHPGYINFS[+79.966]YEVLTPLKWY.Q		M[+16], S[+80]	1050.51	3	3149.51	3149.5	0	3.9	17	Non	255.1	255.1	11.21	4.78	1304	>sp|P02817|AMELX_BOVIN Amelogenin, X isoform OS=Bos taurus OX=9913 GN=AMELX PE=1 SV=2	1	hf1_10472_ebo_24_1_261219.ScanId;v=1;d1=29742.29742.5	controllerType=0 controllerNumber=1 scan=29742	60.7987
37606:3	1	S.M[+15.995]PLPPHPGHPGYINFS[+79.966]YEVLTPLKWY.Q		M[+16], S[+80]	1050.51	3	3149.53	3149.5	0	9.3	17	Non	259.71	259.71	1.92	4.69	1304	>sp|P02817|AMELX_BOVIN Amelogenin, X isoform OS=Bos taurus OX=9913 GN=AMELX PE=1 SV=2	1	hf1_10472_ebo_24_1_261219.ScanId;v=1;d1=27544.27544.5	controllerType=0 controllerNumber=1 scan=27544	56.8542
36873:3	1	S.M[+15.995]PLPPHPGHPGYINFS[+79.966]YEVLTPLKWY.Q		M[+16], S[+80]	1050.51	3	3149.51	3149.5	0	4.5	17	Non	274.99	274.99	16.99	5.04	1304	>sp|P02817|AMELX_BOVIN Amelogenin, X isoform OS=Bos taurus OX=9913 GN=AMELX PE=1 SV=2	1	hf1_10472_ebo_24_1_261219.ScanId;v=1;d1=27069.27069.5	controllerType=0 controllerNumber=1 scan=27069	55.9976
34964:4	1	S.MP[+15.995]LPPHPGHPGYINFS[+79.966]YEVLTPLKWY.Q		P[+16], S[+80]	788.135	4	3149.52	3149.5	0	5.8	17	Non	280.6	280.6	5.26	5.25	1304	>sp|P02817|AMELX_BOVIN Amelogenin, X isoform OS=Bos taurus OX=9913 GN=AMELX PE=1 SV=2	1	hf1_10472_ebo_24_1_261219.ScanId;v=1;d1=25821.25821.4	controllerType=0 controllerNumber=1 scan=25821	53.7348
35536:4	1	S.MP[+15.995]LPPHPGHPGYINFS[+79.966]YEVLTPLKWY.Q		P[+16], S[+80]	788.132	4	3149.51	3149.5	0	2.5	17	Non	291.91	291.91	5.8	5	1304	>sp|P02817|AMELX_BOVIN Amelogenin, X isoform OS=Bos taurus OX=9913 GN=AMELX PE=1 SV=2	1	hf1_10472_ebo_24_1_261219.ScanId;v=1;d1=26202.26202.4	controllerType=0 controllerNumber=1 scan=26202	54.4398
30292:4	1	S.MP[+15.995]LPPHPGHPGYINFSYEVLTPLKW[+15.995]Y.Q		P[+16], W[+16]	772.141	4	3085.54	3085.53	0	4.7	17	Non	295.84	295.84	2.5	5.41	1304	>sp|P02817|AMELX_BOVIN Amelogenin, X isoform OS=Bos taurus OX=9913 GN=AMELX PE=1 SV=2	1	hf1_10472_ebo_24_1_261219.ScanId;v=1;d1=22694.22694.4	controllerType=0 controllerNumber=1 scan=22694	48.1179
34106:4	1	S.MP[+15.995]LPPHPGHPGYINFS[+79.966]YEVLTPLKWY.Q		P[+16], S[+80]	788.136	4	3149.52	3149.5	0	7	17	Non	304.76	304.76	4	5.65	1304	>sp|P02817|AMELX_BOVIN Amelogenin, X isoform OS=Bos taurus OX=9913 GN=AMELX PE=1 SV=2	1	hf1_10472_ebo_24_1_261219.ScanId;v=1;d1=25244.25244.4	controllerType=0 controllerNumber=1 scan=25244	52.6864
34401:4	1	S.MP[+15.995]LPPHPGHPGYINFS[+79.966]YEVLTPLKWY.Q		P[+16], S[+80]	788.136	4	3149.52	3149.5	0	7.5	17	Non	312.53	312.53	4	5.65	1304	>sp|P02817|AMELX_BOVIN Amelogenin, X isoform OS=Bos taurus OX=9913 GN=AMELX PE=1 SV=2	1	hf1_10472_ebo_24_1_261219.ScanId;v=1;d1=25439.25439.4	controllerType=0 controllerNumber=1 scan=25439	53.0329
34684:4	1	S.MP[+15.995]LPPHPGHPGYINFS[+79.966]YEVLTPLKWY.Q		P[+16], S[+80]	788.135	4	3149.52	3149.5	0	6.5	17	Non	320.77	320.77	4	5.63	1304	>sp|P02817|AMELX_BOVIN Amelogenin, X isoform OS=Bos taurus OX=9913 GN=AMELX PE=1 SV=2	1	hf1_10472_ebo_24_1_261219.ScanId;v=1;d1=25632.25632.4	controllerType=0 controllerNumber=1 scan=25632	53.3843
37000:3	1	S.M[+15.995]PLPPHPGHPGYINFS[+79.966]YEVLTPLKWY.Q		M[+16], S[+80]	1050.51	3	3149.51	3149.5	0	1.9	17	Non	416.2	416.2	9.86	5.9	1304	>sp|P02817|AMELX_BOVIN Amelogenin, X isoform OS=Bos taurus OX=9913 GN=AMELX PE=1 SV=2	1	hf1_10472_ebo_24_1_261219.ScanId;v=1;d1=27150.27150.5	controllerType=0 controllerNumber=1 scan=27150	56.142
35850:3	1	S.M[+15.995]PLPPHPGHPGYINFS[+79.966]YEVLTPLKWY.Q		M[+16], S[+80]	1050.51	3	3149.51	3149.5	0	4.3	17	Non	531.48	531.48	15.46	6.85	1304	>sp|P02817|AMELX_BOVIN Amelogenin, X isoform OS=Bos taurus OX=9913 GN=AMELX PE=1 SV=2	1	hf1_10472_ebo_24_1_261219.ScanId;v=1;d1=26409.26409.5	controllerType=0 controllerNumber=1 scan=26409	54.807
47180:3	1	S.M[+15.995]PLPPHPGHPGYINFS[+79.966]YEVLTPLKWY.Q		M[+16], S[+80]	1050.51	3	3149.53	3149.5	0	8.5	17	Non	618	618	6.5	8.99	1304	>sp|P02817|AMELX_BOVIN Amelogenin, X isoform OS=Bos taurus OX=9913 GN=AMELX PE=1 SV=2	1	hf1_10472_ebo_24_1_261219.ScanId;v=1;d1=34756.34756.3	controllerType=0 controllerNumber=1 scan=34756	73.5583
34971:3	1	S.M[+15.995]PLPPHPGHPGYINFS[+79.966]YEVLTPLKWY.Q		M[+16], S[+80]	1050.51	3	3149.52	3149.5	0	5	17	Non	814.24	814.24	16.21	13.33	1304	>sp|P02817|AMELX_BOVIN Amelogenin, X isoform OS=Bos taurus OX=9913 GN=AMELX PE=1 SV=2	1	hf1_10472_ebo_24_1_261219.ScanId;v=1;d1=25826.25826.3	controllerType=0 controllerNumber=1 scan=25826	53.7451
34124:3	1	S.M[+15.995]PLPPHPGHPGYINFS[+79.966]YEVLTPLKWY.Q		M[+16], S[+80]	1050.51	3	3149.52	3149.5	0	6.5	17	Non	900.56	900.56	22.88	15.57	1304	>sp|P02817|AMELX_BOVIN Amelogenin, X isoform OS=Bos taurus OX=9913 GN=AMELX PE=1 SV=2	1	hf1_10472_ebo_24_1_261219.ScanId;v=1;d1=25255.25255.3	controllerType=0 controllerNumber=1 scan=25255	52.7056
34419:3	1	S.M[+15.995]PLPPHPGHPGYINFS[+79.966]YEVLTPLKWY.Q		M[+16], S[+80]	1050.51	3	3149.52	3149.5	0	6	17	Non	952.52	952.52	27.97	16.33	1304	>sp|P02817|AMELX_BOVIN Amelogenin, X isoform OS=Bos taurus OX=9913 GN=AMELX PE=1 SV=2	1	hf1_10472_ebo_24_1_261219.ScanId;v=1;d1=25450.25450.3	controllerType=0 controllerNumber=1 scan=25450	53.0512
34700:3	1	S.M[+15.995]PLPPHPGHPGYINFS[+79.966]YEVLTPLKWY.Q		M[+16], S[+80]	1050.51	3	3149.52	3149.5	0	6.2	17	Non	1001.53	1001.53	29.12	17.33	1304	>sp|P02817|AMELX_BOVIN Amelogenin, X isoform OS=Bos taurus OX=9913 GN=AMELX PE=1 SV=2	1	hf1_10472_ebo_24_1_261219.ScanId;v=1;d1=25643.25643.3	controllerType=0 controllerNumber=1 scan=25643	53.4038
36337:3	1	S.MP[+15.995]LPPHPGHPGYIN[+0.984]FS[+79.966]YEVLTPLKWY.Q		N[+1], P[+16], S[+80]	1050.84	3	3150.51	3150.48	0	7.7	17	Non	98.98	98.98	4	2.19	1304	>sp|P02817|AMELX_BOVIN Amelogenin, X isoform OS=Bos taurus OX=9913 GN=AMELX PE=1 SV=2	1	hf1_10472_ebo_24_1_261219.ScanId;v=1;d1=26719.26719.5	controllerType=0 controllerNumber=1 scan=26719	55.3601
35093:4	1	S.MP[+15.995]LPPHPGHPGYINFS[+79.966]Y[+15.995]EVLTPLKWY.Q		P[+16], S[+80], Y[+16]	792.132	4	3165.51	3165.49	0	4	17	Non	131.11	131.11	4	2.26	1304	>sp|P02817|AMELX_BOVIN Amelogenin, X isoform OS=Bos taurus OX=9913 GN=AMELX PE=1 SV=2	1	hf1_10472_ebo_24_1_261219.ScanId;v=1;d1=25907.25907.4	controllerType=0 controllerNumber=1 scan=25907	53.8927
30891:4	1	S.MP[+15.995]LPPHPGHPGYINFS[+79.966]YEVLTPLKW[+15.995]Y.Q		P[+16], S[+80], W[+16]	792.132	4	3165.51	3165.49	0	3.8	17	Non	142.9	142.9	4	2.26	1304	>sp|P02817|AMELX_BOVIN Amelogenin, X isoform OS=Bos taurus OX=9913 GN=AMELX PE=1 SV=2	1	hf1_10472_ebo_24_1_261219.ScanId;v=1;d1=23086.23086.4	controllerType=0 controllerNumber=1 scan=23086	48.8141
32093:3	1	S.MP[+15.995]LPPHPGHPGYINFS[+79.966]YEVLTPLKWY[+31.990].Q		P[+16], S[+80], Y[+32]	1061.18	3	3181.51	3181.49	0	7.8	17	Non	153.9	153.9	4	2.49	1304	>sp|P02817|AMELX_BOVIN Amelogenin, X isoform OS=Bos taurus OX=9913 GN=AMELX PE=1 SV=2	1	hf1_10472_ebo_24_1_261219.ScanId;v=1;d1=23881.23881.3	controllerType=0 controllerNumber=1 scan=23881	50.2223
34120:4	1	S.MP[+15.995]LPPHPGHPGYINFS[+79.966]YEVLTPLKWY[+31.990].Q		P[+16], S[+80], Y[+32]	796.129	4	3181.49	3181.49	0	1	17	Non	162.21	162.21	0	2.94	1304	>sp|P02817|AMELX_BOVIN Amelogenin, X isoform OS=Bos taurus OX=9913 GN=AMELX PE=1 SV=2	1	hf1_10472_ebo_24_1_261219.ScanId;v=1;d1=25252.25252.4	controllerType=0 controllerNumber=1 scan=25252	52.6983
35073:3	1	S.MP[+15.995]LPPH[+15.995]PGHPGYINFS[+79.966]YEVLTPLKWY.Q		H[+16], P[+16], S[+80]	1055.83	3	3165.49	3165.49	0	-1.6	17	Non	166.36	166.36	4	2.91	1304	>sp|P02817|AMELX_BOVIN Amelogenin, X isoform OS=Bos taurus OX=9913 GN=AMELX PE=1 SV=2	1	hf1_10472_ebo_24_1_261219.ScanId;v=1;d1=25894.25894.3	controllerType=0 controllerNumber=1 scan=25894	53.8702
33084:4	1	S.MP[+15.995]LPPHPGHPGYINFS[+79.966]YEVLTPLKW[+15.995]Y.Q		P[+16], S[+80], W[+16]	792.132	4	3165.51	3165.49	0	3.6	17	Non	167.75	167.75	4	3.23	1304	>sp|P02817|AMELX_BOVIN Amelogenin, X isoform OS=Bos taurus OX=9913 GN=AMELX PE=1 SV=2	1	hf1_10472_ebo_24_1_261219.ScanId;v=1;d1=24546.24546.4	controllerType=0 controllerNumber=1 scan=24546	51.4129
31200:4	1	S.MP[+15.995]LPPHPGHPGYINFS[+79.966]YEVLTPLKW[+31.990]Y.Q		P[+16], S[+80], W[+32]	796.133	4	3181.51	3181.49	0	6.2	17	Non	169.63	169.63	4	3.15	1304	>sp|P02817|AMELX_BOVIN Amelogenin, X isoform OS=Bos taurus OX=9913 GN=AMELX PE=1 SV=2	1	hf1_10472_ebo_24_1_261219.ScanId;v=1;d1=23291.23291.4	controllerType=0 controllerNumber=1 scan=23291	49.1775
32066:4	1	S.MP[+15.995]LPPHPGHPGYINFS[+79.966]YEVLTPLKW[+15.995]Y.Q		P[+16], S[+80], W[+16]	792.135	4	3165.52	3165.49	0	7.3	17	Non	173.65	173.65	4	3.7	1304	>sp|P02817|AMELX_BOVIN Amelogenin, X isoform OS=Bos taurus OX=9913 GN=AMELX PE=1 SV=2	1	hf1_10472_ebo_24_1_261219.ScanId;v=1;d1=23865.23865.4	controllerType=0 controllerNumber=1 scan=23865	50.1954
31183:4	1	S.MP[+15.995]LPPHPGHPGYINFS[+79.966]YEVLTPLKW[+15.995]Y.Q		P[+16], S[+80], W[+16]	792.137	4	3165.52	3165.49	0	9.6	17	Non	174.59	174.59	4	2.68	1304	>sp|P02817|AMELX_BOVIN Amelogenin, X isoform OS=Bos taurus OX=9913 GN=AMELX PE=1 SV=2	1	hf1_10472_ebo_24_1_261219.ScanId;v=1;d1=23280.23280.4	controllerType=0 controllerNumber=1 scan=23280	49.1591
36438:3	1	S.M[+15.995]PLPPHPGHPGYIN[+0.984]FS[+79.966]YEVLTPLKWY.Q		M[+16], N[+1], S[+80]	1050.84	3	3150.51	3150.48	0	8.8	17	Non	183.35	155.46	3.97	1.51	1304	>sp|P02817|AMELX_BOVIN Amelogenin, X isoform OS=Bos taurus OX=9913 GN=AMELX PE=1 SV=2	1	hf1_10472_ebo_24_1_261219.ScanId;v=1;d1=26784.26784.5	controllerType=0 controllerNumber=1 scan=26784	55.4806
33347:4	1	S.MP[+15.995]LPPHPGHPGYINFS[+79.966]YEVLTPLKW[+15.995]Y.Q		P[+16], S[+80], W[+16]	792.132	4	3165.51	3165.49	0	4.2	17	Non	190.45	190.45	4	3.23	1304	>sp|P02817|AMELX_BOVIN Amelogenin, X isoform OS=Bos taurus OX=9913 GN=AMELX PE=1 SV=2	1	hf1_10472_ebo_24_1_261219.ScanId;v=1;d1=24735.24735.4	controllerType=0 controllerNumber=1 scan=24735	51.7577
34430:4	1	S.MP[+15.995]LPPHPGHPGYINFS[+79.966]YEVLTPLKW[+31.990]Y.Q		P[+16], S[+80], W[+32]	796.126	4	3181.48	3181.49	0	-1.7	17	Non	196.89	196.89	4	2.82	1304	>sp|P02817|AMELX_BOVIN Amelogenin, X isoform OS=Bos taurus OX=9913 GN=AMELX PE=1 SV=2	1	hf1_10472_ebo_24_1_261219.ScanId;v=1;d1=25457.25457.4	controllerType=0 controllerNumber=1 scan=25457	53.0618
30895:4	1	S.MP[+15.995]LPPHPGHPGYINFS[+79.966]YEVLTPLKW[+31.990]Y.Q		P[+16], S[+80], W[+32]	796.133	4	3181.51	3181.49	0	7.1	17	Non	201.97	201.97	4	3.9	1304	>sp|P02817|AMELX_BOVIN Amelogenin, X isoform OS=Bos taurus OX=9913 GN=AMELX PE=1 SV=2	1	hf1_10472_ebo_24_1_261219.ScanId;v=1;d1=23090.23090.4	controllerType=0 controllerNumber=1 scan=23090	48.8228
34535:4	1	S.MP[+15.995]LPPHPGHPGYINFS[+79.966]Y[+15.995]EVLTPLKWY.Q		P[+16], S[+80], Y[+16]	792.131	4	3165.5	3165.49	0	2.8	17	Non	216.51	216.51	4	3.43	1304	>sp|P02817|AMELX_BOVIN Amelogenin, X isoform OS=Bos taurus OX=9913 GN=AMELX PE=1 SV=2	1	hf1_10472_ebo_24_1_261219.ScanId;v=1;d1=25527.25527.4	controllerType=0 controllerNumber=1 scan=25527	53.1892
47196:4	1	S.MP[+15.995]LPPHPGHPGYINFS[+79.966]YEVLTPLKW[+15.995]Y.Q		P[+16], S[+80], W[+16]	792.134	4	3165.51	3165.49	0	6.3	17	Non	219.44	219.44	4	4.16	1304	>sp|P02817|AMELX_BOVIN Amelogenin, X isoform OS=Bos taurus OX=9913 GN=AMELX PE=1 SV=2	1	hf1_10472_ebo_24_1_261219.ScanId;v=1;d1=34769.34769.4	controllerType=0 controllerNumber=1 scan=34769	73.5806
31777:4	1	S.MP[+15.995]LPPHPGHPGYINFS[+79.966]YEVLTPLKW[+15.995]Y.Q		P[+16], S[+80], W[+16]	792.132	4	3165.51	3165.49	0	3.9	17	Non	229.28	229.28	4	3.67	1304	>sp|P02817|AMELX_BOVIN Amelogenin, X isoform OS=Bos taurus OX=9913 GN=AMELX PE=1 SV=2	1	hf1_10472_ebo_24_1_261219.ScanId;v=1;d1=23668.23668.4	controllerType=0 controllerNumber=1 scan=23668	49.8446
36091:4	1	S.MPLPPHPGHPGY[+15.995]INF[+31.990]SY[+31.990]EVLTPLKWY.Q		F[+32], Y[+16][+32]	784.136	4	3133.52	3133.51	0	3.2	17	Non	236.51	236.51	1.8	3.67	1304	>sp|P02817|AMELX_BOVIN Amelogenin, X isoform OS=Bos taurus OX=9913 GN=AMELX PE=1 SV=2	1	hf1_10472_ebo_24_1_261219.ScanId;v=1;d1=26562.26562.4	controllerType=0 controllerNumber=1 scan=26562	55.0821
32358:4	1	S.MP[+15.995]LPPHPGHPGYINFS[+79.966]YEVLTPLKW[+15.995]Y.Q		P[+16], S[+80], W[+16]	792.133	4	3165.51	3165.49	0	4.9	17	Non	247.76	247.76	4	4.92	1304	>sp|P02817|AMELX_BOVIN Amelogenin, X isoform OS=Bos taurus OX=9913 GN=AMELX PE=1 SV=2	1	hf1_10472_ebo_24_1_261219.ScanId;v=1;d1=24055.24055.4	controllerType=0 controllerNumber=1 scan=24055	50.5386
31201:3	1	S.MP[+15.995]LPPHPGHPGYINFS[+79.966]YEVLTPLKWY[+31.990].Q		P[+16], S[+80], Y[+32]	1061.18	3	3181.52	3181.49	0	8.8	17	Non	251.75	251.75	0	4.44	1304	>sp|P02817|AMELX_BOVIN Amelogenin, X isoform OS=Bos taurus OX=9913 GN=AMELX PE=1 SV=2	1	hf1_10472_ebo_24_1_261219.ScanId;v=1;d1=23292.23292.3	controllerType=0 controllerNumber=1 scan=23292	49.179
35537:4	1	S.MP[+15.995]LPPHPGHPGYIN[+0.984]FS[+79.966]YEVLTPLKWY.Q		N[+1], P[+16], S[+80]	788.382	4	3150.51	3150.48	0	7.7	17	Non	255.39	255.39	5.8	5.16	1304	>sp|P02817|AMELX_BOVIN Amelogenin, X isoform OS=Bos taurus OX=9913 GN=AMELX PE=1 SV=2	1	hf1_10472_ebo_24_1_261219.ScanId;v=1;d1=26202.26202.4	controllerType=0 controllerNumber=1 scan=26202	54.4398
32661:4	1	S.MP[+15.995]LPPHPGHPGYINFS[+79.966]YEVLTPLKW[+15.995]Y.Q		P[+16], S[+80], W[+16]	792.133	4	3165.51	3165.49	0	5.2	17	Non	277.27	277.27	13.77	4.92	1304	>sp|P02817|AMELX_BOVIN Amelogenin, X isoform OS=Bos taurus OX=9913 GN=AMELX PE=1 SV=2	1	hf1_10472_ebo_24_1_261219.ScanId;v=1;d1=24253.24253.4	controllerType=0 controllerNumber=1 scan=24253	50.8872
47212:3	1	S.MP[+15.995]LPPHPGHPGYINFS[+79.966]YEVLTPLKW[+15.995]Y.Q		P[+16], S[+80], W[+16]	1055.85	3	3165.52	3165.49	0	9.6	17	Non	278.36	278.36	0	4.89	1304	>sp|P02817|AMELX_BOVIN Amelogenin, X isoform OS=Bos taurus OX=9913 GN=AMELX PE=1 SV=2	1	hf1_10472_ebo_24_1_261219.ScanId;v=1;d1=34780.34780.3	controllerType=0 controllerNumber=1 scan=34780	73.6
35257:4	1	S.MP[+15.995]LPPHPGHPGYIN[+0.984]FS[+79.966]YEVLTPLKWY.Q		N[+1], P[+16], S[+80]	788.381	4	3150.5	3150.48	0	6.1	17	Non	281.83	281.83	4	5.41	1304	>sp|P02817|AMELX_BOVIN Amelogenin, X isoform OS=Bos taurus OX=9913 GN=AMELX PE=1 SV=2	1	hf1_10472_ebo_24_1_261219.ScanId;v=1;d1=26015.26015.4	controllerType=0 controllerNumber=1 scan=26015	54.092
36390:4	1	S.MP[+15.995]LPPHPGHPGYINF[+31.990]SY[+31.990]EVLTPLKWY.Q		F[+32], P[+16], Y[+32]	784.129	4	3133.49	3133.51	0	-6.2	17	Non	283.54	283.54	5.8	3.71	1304	>sp|P02817|AMELX_BOVIN Amelogenin, X isoform OS=Bos taurus OX=9913 GN=AMELX PE=1 SV=2	1	hf1_10472_ebo_24_1_261219.ScanId;v=1;d1=26753.26753.4	controllerType=0 controllerNumber=1 scan=26753	55.4222
31487:4	1	S.MP[+15.995]LPPHPGHPGYINFS[+79.966]YEVLTPLKW[+15.995]Y.Q		P[+16], S[+80], W[+16]	792.133	4	3165.51	3165.49	0	4.7	17	Non	288.03	288.03	4	5.25	1304	>sp|P02817|AMELX_BOVIN Amelogenin, X isoform OS=Bos taurus OX=9913 GN=AMELX PE=1 SV=2	1	hf1_10472_ebo_24_1_261219.ScanId;v=1;d1=23476.23476.4	controllerType=0 controllerNumber=1 scan=23476	49.5021
33761:4	1	S.MP[+15.995]LPPHPGHPGYINFS[+79.966]YEVLTPLKW[+31.990]Y.Q		P[+16], S[+80], W[+32]	796.131	4	3181.5	3181.49	0	4.4	17	Non	296.74	296.74	4	5	1304	>sp|P02817|AMELX_BOVIN Amelogenin, X isoform OS=Bos taurus OX=9913 GN=AMELX PE=1 SV=2	1	hf1_10472_ebo_24_1_261219.ScanId;v=1;d1=25017.25017.4	controllerType=0 controllerNumber=1 scan=25017	52.2734
30881:3	1	S.MP[+15.995]LPPHPGHPGYINFS[+79.966]YEVLTPLKWY[+31.990].Q		P[+16], S[+80], Y[+32]	1061.18	3	3181.52	3181.49	0	9.8	17	Non	296.85	296.85	4	5.02	1304	>sp|P02817|AMELX_BOVIN Amelogenin, X isoform OS=Bos taurus OX=9913 GN=AMELX PE=1 SV=2	1	hf1_10472_ebo_24_1_261219.ScanId;v=1;d1=23080.23080.3	controllerType=0 controllerNumber=1 scan=23080	48.805
34219:4	1	S.MP[+15.995]LPPHPGHPGYINFS[+79.966]Y[+15.995]EVLTPLKWY.Q		P[+16], S[+80], Y[+16]	792.132	4	3165.51	3165.49	0	4.2	17	Non	300.38	300.38	4	5	1304	>sp|P02817|AMELX_BOVIN Amelogenin, X isoform OS=Bos taurus OX=9913 GN=AMELX PE=1 SV=2	1	hf1_10472_ebo_24_1_261219.ScanId;v=1;d1=25316.25316.4	controllerType=0 controllerNumber=1 scan=25316	52.8138
33928:4	1	S.MP[+15.995]LPPHPGHPGY[+15.995]INFS[+79.966]YEVLTPLKWY.Q		P[+16], S[+80], Y[+16]	792.134	4	3165.51	3165.49	0	5.9	17	Non	307.23	307.23	4	5.41	1304	>sp|P02817|AMELX_BOVIN Amelogenin, X isoform OS=Bos taurus OX=9913 GN=AMELX PE=1 SV=2	1	hf1_10472_ebo_24_1_261219.ScanId;v=1;d1=25121.25121.4	controllerType=0 controllerNumber=1 scan=25121	52.4586
33483:4	1	S.MP[+15.995]LPPHPGHPGYINFS[+79.966]YEVLTPLKW[+31.990]Y.Q		P[+16], S[+80], W[+32]	796.133	4	3181.51	3181.49	0	6.3	17	Non	307.63	307.63	4	5.49	1304	>sp|P02817|AMELX_BOVIN Amelogenin, X isoform OS=Bos taurus OX=9913 GN=AMELX PE=1 SV=2	1	hf1_10472_ebo_24_1_261219.ScanId;v=1;d1=24828.24828.4	controllerType=0 controllerNumber=1 scan=24828	51.9273
34161:3	1	S.MP[+15.995]LPPHPGHPGY[+15.995]INFS[+79.966]YEVLTPLKWY.Q		P[+16], S[+80], Y[+16]	1055.84	3	3165.51	3165.49	0	5.9	17	Non	389.01	389.01	0	6.57	1304	>sp|P02817|AMELX_BOVIN Amelogenin, X isoform OS=Bos taurus OX=9913 GN=AMELX PE=1 SV=2	1	hf1_10472_ebo_24_1_261219.ScanId;v=1;d1=25278.25278.3	controllerType=0 controllerNumber=1 scan=25278	52.746
34803:3	1	S.MP[+15.995]LP[+15.995]PHPGHPGYINFS[+79.966]YEVLTPLKWY.Q		P[+16]*2, S[+80]	1055.84	3	3165.51	3165.49	0	5.5	17	Non	400.46	400.46	4	6.33	1304	>sp|P02817|AMELX_BOVIN Amelogenin, X isoform OS=Bos taurus OX=9913 GN=AMELX PE=1 SV=2	1	hf1_10472_ebo_24_1_261219.ScanId;v=1;d1=25709.25709.3	controllerType=0 controllerNumber=1 scan=25709	53.5262
31854:3	1	S.MP[+15.995]LPPHPGHPGYINFS[+79.966]YEVLTPLKW[+15.995]Y.Q		P[+16], S[+80], W[+16]	1055.84	3	3165.51	3165.49	0	6.1	17	Non	460.35	460.35	0	6.52	1304	>sp|P02817|AMELX_BOVIN Amelogenin, X isoform OS=Bos taurus OX=9913 GN=AMELX PE=1 SV=2	1	hf1_10472_ebo_24_1_261219.ScanId;v=1;d1=23723.23723.3	controllerType=0 controllerNumber=1 scan=23723	49.941
30955:3	1	S.MP[+15.995]LPPHPGHPGYINFS[+79.966]YEVLTPLKW[+15.995]Y.Q		P[+16], S[+80], W[+16]	1055.84	3	3165.51	3165.49	0	6.3	17	Non	477.51	477.51	0	6.96	1304	>sp|P02817|AMELX_BOVIN Amelogenin, X isoform OS=Bos taurus OX=9913 GN=AMELX PE=1 SV=2	1	hf1_10472_ebo_24_1_261219.ScanId;v=1;d1=23128.23128.3	controllerType=0 controllerNumber=1 scan=23128	48.8912
33710:3	1	S.M[+15.995]PLPPHPGHPGYINFS[+79.966]YEVLTPLKWY[+31.990].Q		M[+16], S[+80], Y[+32]	1061.17	3	3181.51	3181.49	0	6.6	17	Non	577.82	577.82	0	8.57	1304	>sp|P02817|AMELX_BOVIN Amelogenin, X isoform OS=Bos taurus OX=9913 GN=AMELX PE=1 SV=2	1	hf1_10472_ebo_24_1_261219.ScanId;v=1;d1=24982.24982.3	controllerType=0 controllerNumber=1 scan=24982	52.2122
33578:3	1	S.MP[+15.995]LPPHPGHPGYINFS[+79.966]YEVLTPLKW[+15.995]Y.Q		P[+16], S[+80], W[+16]	1055.84	3	3165.5	3165.49	0	2.1	17	Non	581.31	581.31	0	7.29	1304	>sp|P02817|AMELX_BOVIN Amelogenin, X isoform OS=Bos taurus OX=9913 GN=AMELX PE=1 SV=2	1	hf1_10472_ebo_24_1_261219.ScanId;v=1;d1=24898.24898.3	controllerType=0 controllerNumber=1 scan=24898	52.0601
35535:3	1	S.M[+15.995]PLPPHPGHPGYIN[+0.984]FS[+79.966]YEVLTPLKWY.Q		M[+16], N[+1], S[+80]	1050.84	3	3150.51	3150.48	0	7.2	17	Non	670.48	670.48	7.72	10.12	1304	>sp|P02817|AMELX_BOVIN Amelogenin, X isoform OS=Bos taurus OX=9913 GN=AMELX PE=1 SV=2	1	hf1_10472_ebo_24_1_261219.ScanId;v=1;d1=26201.26201.3	controllerType=0 controllerNumber=1 scan=26201	54.4383
32451:3	1	S.MP[+15.995]LPPHPGHPGYINFS[+79.966]YEVLTPLKW[+15.995]Y.Q		P[+16], S[+80], W[+16]	1055.84	3	3165.51	3165.49	0	5.9	17	Non	703.86	703.86	0	11.33	1304	>sp|P02817|AMELX_BOVIN Amelogenin, X isoform OS=Bos taurus OX=9913 GN=AMELX PE=1 SV=2	1	hf1_10472_ebo_24_1_261219.ScanId;v=1;d1=24114.24114.3	controllerType=0 controllerNumber=1 scan=24114	50.6426
33879:3	1	S.MP[+15.995]LPPHPGHPGY[+15.995]INFS[+79.966]YEVLTPLKWY.Q		P[+16], S[+80], Y[+16]	1055.84	3	3165.51	3165.49	0	5.9	17	Non	804.22	804.22	2.5	13.33	1304	>sp|P02817|AMELX_BOVIN Amelogenin, X isoform OS=Bos taurus OX=9913 GN=AMELX PE=1 SV=2	1	hf1_10472_ebo_24_1_261219.ScanId;v=1;d1=25090.25090.3	controllerType=0 controllerNumber=1 scan=25090	52.4018
31556:3	1	S.M[+15.995]PLPPHPGHPGYINFS[+79.966]YEVLTPLKW[+15.995]Y.Q		M[+16], S[+80], W[+16]	1055.84	3	3165.51	3165.49	0	4.8	17	Non	848.73	848.73	0	13.33	1304	>sp|P02817|AMELX_BOVIN Amelogenin, X isoform OS=Bos taurus OX=9913 GN=AMELX PE=1 SV=2	1	hf1_10472_ebo_24_1_261219.ScanId;v=1;d1=23520.23520.3	controllerType=0 controllerNumber=1 scan=23520	49.5787
32750:3	1	S.M[+15.995]PLPPHPGHPGYINFS[+79.966]YEVLTPLKWY[+15.995].Q		M[+16], S[+80], Y[+16]	1055.84	3	3165.51	3165.49	0	5.8	17	Non	885.96	885.96	0	14.33	1304	>sp|P02817|AMELX_BOVIN Amelogenin, X isoform OS=Bos taurus OX=9913 GN=AMELX PE=1 SV=2	1	hf1_10472_ebo_24_1_261219.ScanId;v=1;d1=24315.24315.3	controllerType=0 controllerNumber=1 scan=24315	50.9975
35256:3	1	S.M[+15.995]PLPPHPGHPGYIN[+0.984]FS[+79.966]YEVLTPLKWY.Q		M[+16], N[+1], S[+80]	1050.84	3	3150.5	3150.48	0	6.4	17	Non	899.36	899.36	20.52	14.57	1304	>sp|P02817|AMELX_BOVIN Amelogenin, X isoform OS=Bos taurus OX=9913 GN=AMELX PE=1 SV=2	1	hf1_10472_ebo_24_1_261219.ScanId;v=1;d1=26014.26014.3	controllerType=0 controllerNumber=1 scan=26014	54.0911
33426:3	1	S.M[+15.995]PLPPHPGHPGYINFS[+79.966]YEVLTPLKWY[+31.990].Q		M[+16], S[+80], Y[+32]	1061.18	3	3181.51	3181.49	0	7.2	17	Non	916.85	916.85	0	15.57	1304	>sp|P02817|AMELX_BOVIN Amelogenin, X isoform OS=Bos taurus OX=9913 GN=AMELX PE=1 SV=2	1	hf1_10472_ebo_24_1_261219.ScanId;v=1;d1=24791.24791.3	controllerType=0 controllerNumber=1 scan=24791	51.8605
43730:4	1	S.MP[+15.995]LPP[+15.995]HP[+31.990]GHPGYINF[+31.990]SYEVLTPLKWY.Q		F[+32], P[+16]*2[+32]	788.135	4	3149.52	3149.51	0	3.7	17	Non	32.74	32.74	0	1.63	1304	>sp|P02817|AMELX_BOVIN Amelogenin, X isoform OS=Bos taurus OX=9913 GN=AMELX PE=1 SV=2	1	hf1_10472_ebo_24_1_261219.ScanId;v=1;d1=31517.31517.4	controllerType=0 controllerNumber=1 scan=31517	64.0733
40904:4	1	S.MP[+15.995]LP[+15.995]P[+31.990]HP[+31.990]GHPGYINFSYEVLTPLKWY.Q		P[+16]*2[+32]*2	788.135	4	3149.52	3149.51	0	2.8	17	Non	40.25	40.25	0	1.63	1304	>sp|P02817|AMELX_BOVIN Amelogenin, X isoform OS=Bos taurus OX=9913 GN=AMELX PE=1 SV=2	1	hf1_10472_ebo_24_1_261219.ScanId;v=1;d1=29677.29677.4	controllerType=0 controllerNumber=1 scan=29677	60.6829
40004:3	1	S.MP[+15.995]LPPHPGHP[+31.990]GY[+31.990]INF[+15.995]SYEVLTPLKWY.Q		F[+16], P[+16][+32], Y[+32]	1050.51	3	3149.51	3149.51	0	0.4	17	Non	41.35	41.35	0	1.97	1304	>sp|P02817|AMELX_BOVIN Amelogenin, X isoform OS=Bos taurus OX=9913 GN=AMELX PE=1 SV=2	1	hf1_10472_ebo_24_1_261219.ScanId;v=1;d1=29090.29090.3	controllerType=0 controllerNumber=1 scan=29090	59.6352
39328:4	1	S.MP[+15.995]LPPHPGHPGY[+31.990]INF[+31.990]SY[+15.995]EVLTPLKWY.Q		F[+32], P[+16], Y[+16][+32]	788.136	4	3149.52	3149.51	0	4.3	17	Non	46.28	46.28	2	2.23	1304	>sp|P02817|AMELX_BOVIN Amelogenin, X isoform OS=Bos taurus OX=9913 GN=AMELX PE=1 SV=2	1	hf1_10472_ebo_24_1_261219.ScanId;v=1;d1=28649.28649.4	controllerType=0 controllerNumber=1 scan=28649	58.8436
34345:3	1	S.MP[+15.995]LPPHPGHPGYIN[+0.984]FSYEVLTPLKW[+31.990]Y[+31.990].Q		N[+1], P[+16], W[+32], Y[+32]	1045.5	3	3134.5	3134.5	0	1	17	Non	48.4	48.4	0	1.97	1304	>sp|P02817|AMELX_BOVIN Amelogenin, X isoform OS=Bos taurus OX=9913 GN=AMELX PE=1 SV=2	1	hf1_10472_ebo_24_1_261219.ScanId;v=1;d1=25402.25402.3	controllerType=0 controllerNumber=1 scan=25402	52.9659
44245:4	1	S.MP[+15.995]LPPHPGHP[+15.995]GY[+31.990]INF[+31.990]SYEVLTPLKWY.Q		F[+32], P[+16]*2, Y[+32]	788.134	4	3149.51	3149.51	0	2.2	17	Non	55.67	55.67	0	2.2	1304	>sp|P02817|AMELX_BOVIN Amelogenin, X isoform OS=Bos taurus OX=9913 GN=AMELX PE=1 SV=2	1	hf1_10472_ebo_24_1_261219.ScanId;v=1;d1=31878.31878.4	controllerType=0 controllerNumber=1 scan=31878	64.7636
34455:5	1	S.MP[+15.995]LPPHPGHP[+31.990]GY[+15.995]INF[+31.990]SYEVLTPLKWY.Q		F[+32], P[+16][+32], Y[+16]	630.709	5	3149.52	3149.51	0	2.4	17	Non	77.74	77.74	0	1.24	1304	>sp|P02817|AMELX_BOVIN Amelogenin, X isoform OS=Bos taurus OX=9913 GN=AMELX PE=1 SV=2	1	hf1_10472_ebo_24_1_261219.ScanId;v=1;d1=25474.25474.5	controllerType=0 controllerNumber=1 scan=25474	53.0929
37224:4	1	S.MP[+15.995]LPPHPGHP[+31.990]GY[+15.995]INF[+31.990]SYEVLTPLKWY.Q		F[+32], P[+16][+32], Y[+16]	788.136	4	3149.52	3149.51	0	5.1	17	Non	79.11	79.11	0	2.23	1304	>sp|P02817|AMELX_BOVIN Amelogenin, X isoform OS=Bos taurus OX=9913 GN=AMELX PE=1 SV=2	1	hf1_10472_ebo_24_1_261219.ScanId;v=1;d1=27296.27296.4	controllerType=0 controllerNumber=1 scan=27296	56.4031
42871:4	1	S.MP[+15.995]LPPHPGHP[+15.995]GYINF[+31.990]SY[+31.990]EVLTPLKWY.Q		F[+32], P[+16]*2, Y[+32]	788.134	4	3149.52	3149.51	0	2.5	17	Non	87.91	87.91	0	2.22	1304	>sp|P02817|AMELX_BOVIN Amelogenin, X isoform OS=Bos taurus OX=9913 GN=AMELX PE=1 SV=2	1	hf1_10472_ebo_24_1_261219.ScanId;v=1;d1=30962.30962.4	controllerType=0 controllerNumber=1 scan=30962	63.0189
43143:4	1	S.MP[+15.995]LPPHPGHP[+15.995]GYINF[+31.990]SY[+31.990]EVLTPLKWY.Q		F[+32], P[+16]*2, Y[+32]	788.137	4	3149.53	3149.51	0	5.7	17	Non	123.45	123.45	0	2.63	1304	>sp|P02817|AMELX_BOVIN Amelogenin, X isoform OS=Bos taurus OX=9913 GN=AMELX PE=1 SV=2	1	hf1_10472_ebo_24_1_261219.ScanId;v=1;d1=31141.31141.4	controllerType=0 controllerNumber=1 scan=31141	63.3708
34256:4	1	S.MP[+15.995]LPPHP[+15.995]GHPGYINF[+31.990]S[+79.966]YEVLTPLKWY.Q		F[+32], P[+16]*2, S[+80]	800.132	4	3197.5	3197.48	0	6.4	17	Non	124.49	124.49	0	2.21	1304	>sp|P02817|AMELX_BOVIN Amelogenin, X isoform OS=Bos taurus OX=9913 GN=AMELX PE=1 SV=2	1	hf1_10472_ebo_24_1_261219.ScanId;v=1;d1=25342.25342.4	controllerType=0 controllerNumber=1 scan=25342	52.8581
33817:4	1	S.M[+15.995]PLPPHPGHPGYINF[+31.990]SY[+31.990]EVLTPLKW[+15.995]Y.Q		F[+32], M[+16], W[+16], Y[+32]	788.134	4	3149.52	3149.51	0	2.5	17	Non	146.77	146.77	2.99	2.26	1304	>sp|P02817|AMELX_BOVIN Amelogenin, X isoform OS=Bos taurus OX=9913 GN=AMELX PE=1 SV=2	1	hf1_10472_ebo_24_1_261219.ScanId;v=1;d1=25052.25052.4	controllerType=0 controllerNumber=1 scan=25052	52.3333
37590:4	1	S.MP[+15.995]LPPHPGHP[+15.995]GY[+31.990]INF[+31.990]SYEVLTPLKWY.Q		F[+32], P[+16]*2, Y[+32]	788.136	4	3149.52	3149.51	0	4.4	17	Non	157.62	157.62	0	2.82	1304	>sp|P02817|AMELX_BOVIN Amelogenin, X isoform OS=Bos taurus OX=9913 GN=AMELX PE=1 SV=2	1	hf1_10472_ebo_24_1_261219.ScanId;v=1;d1=27533.27533.3	controllerType=0 controllerNumber=1 scan=27533	56.8346
34438:3	1	S.MP[+15.995]LPPHPGHPGYIN[+0.984]FS[+79.966]YEVLTP[+31.990]LKWY.Q		N[+1], P[+16][+32], S[+80]	1061.5	3	3182.49	3182.47	0	5	17	Non	339.59	339.59	2.85	5.5	1304	>sp|P02817|AMELX_BOVIN Amelogenin, X isoform OS=Bos taurus OX=9913 GN=AMELX PE=1 SV=2	1	hf1_10472_ebo_24_1_261219.ScanId;v=1;d1=25464.25464.3	controllerType=0 controllerNumber=1 scan=25464	53.0752
34147:3	1	S.M[+15.995]PLPPHPGHPGYIN[+0.984]FS[+79.966]YEVLTPLKWY[+31.990].Q		M[+16], N[+1], S[+80], Y[+32]	1061.5	3	3182.5	3182.47	0	7.1	17	Non	556.35	556.35	0	7.76	1304	>sp|P02817|AMELX_BOVIN Amelogenin, X isoform OS=Bos taurus OX=9913 GN=AMELX PE=1 SV=2	1	hf1_10472_ebo_24_1_261219.ScanId;v=1;d1=25270.25270.3	controllerType=0 controllerNumber=1 scan=25270	52.7311
47205:4	1	S.MP[+15.995]LPPHPGHPGYINFS[+79.966]YEVLTPLKWYQ.S		P[+16], S[+80]	820.151	4	3277.58	3277.56	0	7.5	17	Non	204.23	204.23	4	4.16	1304	>sp|P02817|AMELX_BOVIN Amelogenin, X isoform OS=Bos taurus OX=9913 GN=AMELX PE=1 SV=2	1	hf1_10472_ebo_24_1_261219.ScanId;v=1;d1=34775.34775.4	controllerType=0 controllerNumber=1 scan=34775	73.5924
33098:4	1	S.MP[+15.995]LPPHPGHPGYINFS[+79.966]YEVLTPLKWYQ.S		P[+16], S[+80]	820.149	4	3277.57	3277.56	0	4.9	17	Non	273	273	1.16	4.92	1304	>sp|P02817|AMELX_BOVIN Amelogenin, X isoform OS=Bos taurus OX=9913 GN=AMELX PE=1 SV=2	1	hf1_10472_ebo_24_1_261219.ScanId;v=1;d1=24557.24557.4	controllerType=0 controllerNumber=1 scan=24557	51.4336
33365:4	1	S.MP[+15.995]LPPHPGHPGYINFS[+79.966]YEVLTPLKWYQ.S		P[+16], S[+80]	820.15	4	3277.58	3277.56	0	6.2	17	Non	303.02	303.02	4	5.41	1304	>sp|P02817|AMELX_BOVIN Amelogenin, X isoform OS=Bos taurus OX=9913 GN=AMELX PE=1 SV=2	1	hf1_10472_ebo_24_1_261219.ScanId;v=1;d1=24746.24746.4	controllerType=0 controllerNumber=1 scan=24746	51.7766
32852:3	1	S.M[+15.995]PLPPHPGHPGYINFS[+79.966]YEVLTPLKWYQ.S		M[+16], S[+80]	1093.2	3	3277.58	3277.56	0	6.7	17	Non	870.09	870.09	9.77	14.57	1304	>sp|P02817|AMELX_BOVIN Amelogenin, X isoform OS=Bos taurus OX=9913 GN=AMELX PE=1 SV=2	1	hf1_10472_ebo_24_1_261219.ScanId;v=1;d1=24389.24389.3	controllerType=0 controllerNumber=1 scan=24389	51.1278
33402:3	1	S.M[+15.995]PLPPHPGHPGYINFS[+79.966]YEVLTPLKWYQ.S		M[+16], S[+80]	1093.2	3	3277.58	3277.56	0	7.2	17	Non	880.96	880.96	9.39	14.57	1304	>sp|P02817|AMELX_BOVIN Amelogenin, X isoform OS=Bos taurus OX=9913 GN=AMELX PE=1 SV=2	1	hf1_10472_ebo_24_1_261219.ScanId;v=1;d1=24773.24773.3	controllerType=0 controllerNumber=1 scan=24773	51.8278
33128:3	1	S.M[+15.995]PLPPHPGHPGYINFS[+79.966]YEVLTPLKWYQ.S		M[+16], S[+80]	1093.2	3	3277.58	3277.56	0	6.7	17	Non	1008.79	1008.79	21.42	17.57	1304	>sp|P02817|AMELX_BOVIN Amelogenin, X isoform OS=Bos taurus OX=9913 GN=AMELX PE=1 SV=2	1	hf1_10472_ebo_24_1_261219.ScanId;v=1;d1=24579.24579.3	controllerType=0 controllerNumber=1 scan=24579	51.4737
30705:4	1	S.MP[+15.995]LPPHPGHPGYINFS[+79.966]YEVLTPLKW[+15.995]YQ.S		P[+16], S[+80], W[+16]	824.149	4	3293.57	3293.55	0	6.2	17	Non	119.8	119.8	4	2.18	1304	>sp|P02817|AMELX_BOVIN Amelogenin, X isoform OS=Bos taurus OX=9913 GN=AMELX PE=1 SV=2	1	hf1_10472_ebo_24_1_261219.ScanId;v=1;d1=22966.22966.4	controllerType=0 controllerNumber=1 scan=22966	48.6032
32568:4	1	S.MP[+15.995]LPPHPGHPGYINFS[+79.966]Y[+15.995]EVLTPLKWYQ.S		P[+16], S[+80], Y[+16]	824.147	4	3293.57	3293.55	0	4.2	17	Non	133.69	133.69	4	2.18	1304	>sp|P02817|AMELX_BOVIN Amelogenin, X isoform OS=Bos taurus OX=9913 GN=AMELX PE=1 SV=2	1	hf1_10472_ebo_24_1_261219.ScanId;v=1;d1=24190.24190.4	controllerType=0 controllerNumber=1 scan=24190	50.7741
34694:3	1	S.MP[+15.995]LPPHPGHPGYINFS[+79.966]YEVLTPLKWYQ[+0.984].S		P[+16], Q[+1], S[+80]	1093.52	3	3278.55	3278.54	0	3	17	Non	149.68	149.68	4	2.54	1304	>sp|P02817|AMELX_BOVIN Amelogenin, X isoform OS=Bos taurus OX=9913 GN=AMELX PE=1 SV=2	1	hf1_10472_ebo_24_1_261219.ScanId;v=1;d1=25638.25638.3	controllerType=0 controllerNumber=1 scan=25638	53.3934
33950:4	1	S.MP[+15.995]LPPHPGHPGYIN[+0.984]FS[+79.966]YEVLTPLKWYQ.S		N[+1], P[+16], S[+80]	820.397	4	3278.56	3278.54	0	6.8	17	Non	196.93	175.33	4	3.7	1304	>sp|P02817|AMELX_BOVIN Amelogenin, X isoform OS=Bos taurus OX=9913 GN=AMELX PE=1 SV=2	1	hf1_10472_ebo_24_1_261219.ScanId;v=1;d1=25138.25138.4	controllerType=0 controllerNumber=1 scan=25138	52.4889
31578:4	1	S.MP[+15.995]LPPHPGHPGYINFS[+79.966]YEVLTPLKW[+15.995]YQ.S		P[+16], S[+80], W[+16]	824.149	4	3293.58	3293.55	0	7	17	Non	247.82	247.82	4	5.16	1304	>sp|P02817|AMELX_BOVIN Amelogenin, X isoform OS=Bos taurus OX=9913 GN=AMELX PE=1 SV=2	1	hf1_10472_ebo_24_1_261219.ScanId;v=1;d1=23536.23536.4	controllerType=0 controllerNumber=1 scan=23536	49.6048
33645:4	1	S.MP[+15.995]LPPHPGHPGYINFS[+79.966]YEVLTPLKWYQ[+0.984].S		P[+16], Q[+1], S[+80]	820.398	4	3278.57	3278.54	0	7.9	17	Non	255.1	253.46	4	4.9	1304	>sp|P02817|AMELX_BOVIN Amelogenin, X isoform OS=Bos taurus OX=9913 GN=AMELX PE=1 SV=2	1	hf1_10472_ebo_24_1_261219.ScanId;v=1;d1=24940.24940.4	controllerType=0 controllerNumber=1 scan=24940	52.1377
34625:3	1	S.M[+15.995]PLPPHPGHPGYINFS[+79.966]YEVLTPLKWYQ[+0.984].S		M[+16], Q[+1], S[+80]	1093.53	3	3278.57	3278.54	0	7.4	17	Non	367.57	367.57	20.63	6.66	1304	>sp|P02817|AMELX_BOVIN Amelogenin, X isoform OS=Bos taurus OX=9913 GN=AMELX PE=1 SV=2	1	hf1_10472_ebo_24_1_261219.ScanId;v=1;d1=25590.25590.5	controllerType=0 controllerNumber=1 scan=25590	53.3012
33720:3	1	S.MP[+15.995]LPPHPGHPGYINFS[+79.966]YEVLTPLKWYQ[+0.984].S		P[+16], Q[+1], S[+80]	1093.53	3	3278.57	3278.54	0	7.1	17	Non	422.39	409.65	4	6.72	1304	>sp|P02817|AMELX_BOVIN Amelogenin, X isoform OS=Bos taurus OX=9913 GN=AMELX PE=1 SV=2	1	hf1_10472_ebo_24_1_261219.ScanId;v=1;d1=24988.24988.5	controllerType=0 controllerNumber=1 scan=24988	52.2213
30748:3	1	S.MP[+15.995]LPPHPGHPGYINFS[+79.966]YEVLTPLKW[+15.995]YQ.S		P[+16], S[+80], W[+16]	1098.53	3	3293.57	3293.55	0	3.9	17	Non	433.63	433.63	1.73	6.51	1304	>sp|P02817|AMELX_BOVIN Amelogenin, X isoform OS=Bos taurus OX=9913 GN=AMELX PE=1 SV=2	1	hf1_10472_ebo_24_1_261219.ScanId;v=1;d1=22993.22993.3	controllerType=0 controllerNumber=1 scan=22993	48.649
31547:3	1	S.M[+15.995]PLPPHPGHPGYINFS[+79.966]YEVLTPLKW[+15.995]YQ.S		M[+16], S[+80], W[+16]	1098.53	3	3293.57	3293.55	0	4.5	17	Non	456.94	456.94	1.94	6.72	1304	>sp|P02817|AMELX_BOVIN Amelogenin, X isoform OS=Bos taurus OX=9913 GN=AMELX PE=1 SV=2	1	hf1_10472_ebo_24_1_261219.ScanId;v=1;d1=23515.23515.4	controllerType=0 controllerNumber=1 scan=23515	49.5684
34137:3	1	S.MP[+15.995]LPPHPGHPGYIN[+0.984]FS[+79.966]YEVLTPLKWYQ.S		N[+1], P[+16], S[+80]	1093.53	3	3278.57	3278.54	0	7.7	17	Non	475.64	447.13	4	6.96	1304	>sp|P02817|AMELX_BOVIN Amelogenin, X isoform OS=Bos taurus OX=9913 GN=AMELX PE=1 SV=2	1	hf1_10472_ebo_24_1_261219.ScanId;v=1;d1=25263.25263.3	controllerType=0 controllerNumber=1 scan=25263	52.7178
33838:3	1	S.M[+15.995]PLPPHPGHPGYIN[+0.984]FS[+79.966]YEVLTPLKWYQ.S		M[+16], N[+1], S[+80]	1093.53	3	3278.56	3278.54	0	6.5	17	Non	688.22	566.99	22.41	10.57	1304	>sp|P02817|AMELX_BOVIN Amelogenin, X isoform OS=Bos taurus OX=9913 GN=AMELX PE=1 SV=2	1	hf1_10472_ebo_24_1_261219.ScanId;v=1;d1=25064.25064.3	controllerType=0 controllerNumber=1 scan=25064	52.3543
33686:3	1	S.M[+15.995]PLPPHPGHPGYINFS[+79.966]YEVLTPLKWYQ[+0.984].S		M[+16], Q[+1], S[+80]	1093.53	3	3278.56	3278.54	0	6.4	17	Non	725.4	662.04	22.16	11.57	1304	>sp|P02817|AMELX_BOVIN Amelogenin, X isoform OS=Bos taurus OX=9913 GN=AMELX PE=1 SV=2	1	hf1_10472_ebo_24_1_261219.ScanId;v=1;d1=24966.24966.4	controllerType=0 controllerNumber=1 scan=24966	52.1825
34579:3	1	S.MPLPPHPGHPGYINFS[+79.966]YEVLTPLKWYQS.M		S[+80]	1116.88	3	3348.61	3348.6	0	5.5	17	Non	86.97	86.97	43.86	2.36	1304	>sp|P02817|AMELX_BOVIN Amelogenin, X isoform OS=Bos taurus OX=9913 GN=AMELX PE=1 SV=2	1	hf1_10472_ebo_24_1_261219.ScanId;v=1;d1=25558.25558.3	controllerType=0 controllerNumber=1 scan=25558	53.2444
30402:4	1	S.MP[+15.995]LPPHPGHPGYINFSYEVLTPLKWYQS.M		P[+16]	821.913	4	3284.63	3284.62	0	2.5	17	Non	327.99	303.37	4	5.42	1304	>sp|P02817|AMELX_BOVIN Amelogenin, X isoform OS=Bos taurus OX=9913 GN=AMELX PE=1 SV=2	1	hf1_10472_ebo_24_1_261219.ScanId;v=1;d1=22768.22768.4	controllerType=0 controllerNumber=1 scan=22768	48.2508
31218:3	1	S.M[+15.995]PLPPHPGHPGYINFSYEVLTPLKWYQS.M		M[+16]	1095.55	3	3284.65	3284.62	0	7.6	17	Non	382.45	350.69	8.71	6.13	1304	>sp|P02817|AMELX_BOVIN Amelogenin, X isoform OS=Bos taurus OX=9913 GN=AMELX PE=1 SV=2	1	hf1_10472_ebo_24_1_261219.ScanId;v=1;d1=23302.23302.3	controllerType=0 controllerNumber=1 scan=23302	49.1969
31190:4	1	S.MP[+15.995]LPPHPGHPGYINFSYEVLTPLKWYQS.M		P[+16]	821.916	4	3284.64	3284.62	0	5.4	17	Non	401.77	389.18	8.34	6.42	1304	>sp|P02817|AMELX_BOVIN Amelogenin, X isoform OS=Bos taurus OX=9913 GN=AMELX PE=1 SV=2	1	hf1_10472_ebo_24_1_261219.ScanId;v=1;d1=23284.23284.4	controllerType=0 controllerNumber=1 scan=23284	49.1641
34199:3	1	S.MPLPPHPGHPGYINFS[+79.966]YEVLTPLKWYQS.M		S[+80]	1116.88	3	3348.62	3348.6	0	7.9	17	Non	696.05	696.05	157.92	10.77	1304	>sp|P02817|AMELX_BOVIN Amelogenin, X isoform OS=Bos taurus OX=9913 GN=AMELX PE=1 SV=2	1	hf1_10472_ebo_24_1_261219.ScanId;v=1;d1=25303.25303.3	controllerType=0 controllerNumber=1 scan=25303	52.7914
33001:5	1	S.MP[+15.995]LPPHPGHPGYINFS[+79.966]YEVLTPLKWYQS.M		P[+16], S[+80]	673.727	5	3364.61	3364.59	0	5	17	Non	190.2	190.2	4	3.27	1304	>sp|P02817|AMELX_BOVIN Amelogenin, X isoform OS=Bos taurus OX=9913 GN=AMELX PE=1 SV=2	1	hf1_10472_ebo_24_1_261219.ScanId;v=1;d1=24494.24494.5	controllerType=0 controllerNumber=1 scan=24494	51.3186
32725:5	1	S.MP[+15.995]LPPHPGHPGYINFS[+79.966]YEVLTPLKWYQS.M		P[+16], S[+80]	673.727	5	3364.61	3364.59	0	4.7	17	Non	199.25	199.25	4	3.27	1304	>sp|P02817|AMELX_BOVIN Amelogenin, X isoform OS=Bos taurus OX=9913 GN=AMELX PE=1 SV=2	1	hf1_10472_ebo_24_1_261219.ScanId;v=1;d1=24298.24298.5	controllerType=0 controllerNumber=1 scan=24298	50.9676
32680:4	1	S.MP[+15.995]LPPHPGHPGYINFS[+79.966]YEVLTPLKWYQS.M		P[+16], S[+80]	841.908	4	3364.61	3364.59	0	5.4	17	Non	240.22	240.22	4	4.98	1304	>sp|P02817|AMELX_BOVIN Amelogenin, X isoform OS=Bos taurus OX=9913 GN=AMELX PE=1 SV=2	1	hf1_10472_ebo_24_1_261219.ScanId;v=1;d1=24268.24268.4	controllerType=0 controllerNumber=1 scan=24268	50.9146
32962:4	1	S.MP[+15.995]LPPHPGHPGYINFS[+79.966]YEVLTPLKWYQS.M		P[+16], S[+80]	841.908	4	3364.61	3364.59	0	5.5	17	Non	269.17	269.17	4	5.12	1304	>sp|P02817|AMELX_BOVIN Amelogenin, X isoform OS=Bos taurus OX=9913 GN=AMELX PE=1 SV=2	1	hf1_10472_ebo_24_1_261219.ScanId;v=1;d1=24465.24465.4	controllerType=0 controllerNumber=1 scan=24465	51.2682
33236:4	1	S.MP[+15.995]LPPHPGHPGYINFS[+79.966]YEVLTPLKWYQS.M		P[+16], S[+80]	841.908	4	3364.61	3364.59	0	6.1	17	Non	290.94	290.94	4	5.61	1304	>sp|P02817|AMELX_BOVIN Amelogenin, X isoform OS=Bos taurus OX=9913 GN=AMELX PE=1 SV=2	1	hf1_10472_ebo_24_1_261219.ScanId;v=1;d1=24652.24652.4	controllerType=0 controllerNumber=1 scan=24652	51.605
47220:3	1	S.M[+15.995]PLPPHPGHPGYINFS[+79.966]YEVLTPLKWYQS.M		M[+16], S[+80]	1122.21	3	3364.62	3364.59	0	9.3	17	Non	521.2	521.2	11.84	7.39	1304	>sp|P02817|AMELX_BOVIN Amelogenin, X isoform OS=Bos taurus OX=9913 GN=AMELX PE=1 SV=2	1	hf1_10472_ebo_24_1_261219.ScanId;v=1;d1=34787.34787.3	controllerType=0 controllerNumber=1 scan=34787	73.613
33239:3	1	S.MP[+15.995]LPPHPGHPGYINFS[+79.966]YEVLTPLKWYQS.M		P[+16], S[+80]	1122.21	3	3364.61	3364.59	0	6.4	17	Non	892.12	892.12	4	14.77	1304	>sp|P02817|AMELX_BOVIN Amelogenin, X isoform OS=Bos taurus OX=9913 GN=AMELX PE=1 SV=2	1	hf1_10472_ebo_24_1_261219.ScanId;v=1;d1=24656.24656.3	controllerType=0 controllerNumber=1 scan=24656	51.6135
32686:3	1	S.M[+15.995]PLPPHPGHPGYINFS[+79.966]YEVLTPLKWYQS.M		M[+16], S[+80]	1122.21	3	3364.61	3364.59	0	5.9	17	Non	945.8	945.8	6.43	15.53	1304	>sp|P02817|AMELX_BOVIN Amelogenin, X isoform OS=Bos taurus OX=9913 GN=AMELX PE=1 SV=2	1	hf1_10472_ebo_24_1_261219.ScanId;v=1;d1=24271.24271.3	controllerType=0 controllerNumber=1 scan=24271	50.9192
32964:3	1	S.M[+15.995]PLPPHPGHPGYINFS[+79.966]YEVLTPLKWYQS.M		M[+16], S[+80]	1122.21	3	3364.61	3364.59	0	5.9	17	Non	972.3	972.3	25.72	16.53	1304	>sp|P02817|AMELX_BOVIN Amelogenin, X isoform OS=Bos taurus OX=9913 GN=AMELX PE=1 SV=2	1	hf1_10472_ebo_24_1_261219.ScanId;v=1;d1=24467.24467.3	controllerType=0 controllerNumber=1 scan=24467	51.2696
33208:3	1	S.MPLPPHPGHPGYIN[+0.984]F[+31.990]S[+79.966]YEVLTPLKWYQS.M		F[+32], N[+1], S[+80]	1127.87	3	3381.59	3381.57	0	5.6	17	Non	49.72	40.34	2.38	1.3	1304	>sp|P02817|AMELX_BOVIN Amelogenin, X isoform OS=Bos taurus OX=9913 GN=AMELX PE=1 SV=2	1	hf1_10472_ebo_24_1_261219.ScanId;v=1;d1=24631.24631.3	controllerType=0 controllerNumber=1 scan=24631	51.5657
31061:4	1	S.MP[+15.995]LPPHPGHPGYINF[+31.990]S[+79.966]YEVLTPLKWYQS.M		F[+32], P[+16], S[+80]	849.908	4	3396.61	3396.58	0	9	17	Non	52.89	52.89	3.15	1.23	1304	>sp|P02817|AMELX_BOVIN Amelogenin, X isoform OS=Bos taurus OX=9913 GN=AMELX PE=1 SV=2	1	hf1_10472_ebo_24_1_261219.ScanId;v=1;d1=23197.23197.4	controllerType=0 controllerNumber=1 scan=23197	49.0137
32460:4	1	S.MP[+15.995]LPPHPGHPGYINF[+15.995]S[+79.966]YEVLTPLKWYQS.M		F[+16], P[+16], S[+80]	845.907	4	3380.61	3380.59	0	6.4	17	Non	99.1	99.1	4	2.2	1304	>sp|P02817|AMELX_BOVIN Amelogenin, X isoform OS=Bos taurus OX=9913 GN=AMELX PE=1 SV=2	1	hf1_10472_ebo_24_1_261219.ScanId;v=1;d1=24119.24119.4	controllerType=0 controllerNumber=1 scan=24119	50.6488
30860:4	1	S.MP[+15.995]LPPHPGHPGYINFS[+79.966]YEVLTPLKW[+15.995]YQS.M		P[+16], S[+80], W[+16]	845.907	4	3380.6	3380.59	0	5.7	17	Non	103.33	103.33	6.53	2.18	1304	>sp|P02817|AMELX_BOVIN Amelogenin, X isoform OS=Bos taurus OX=9913 GN=AMELX PE=1 SV=2	1	hf1_10472_ebo_24_1_261219.ScanId;v=1;d1=23067.23067.4	controllerType=0 controllerNumber=1 scan=23067	48.7825
47183:4	1	S.MPLPPHPGHP[+31.990]GYINF[+31.990]SY[+15.995]EVLTPLKWYQS.M		F[+32], P[+32], Y[+16]	837.909	4	3348.62	3348.6	0	3.7	17	Non	113.67	113.67	1.5	1.41	1304	>sp|P02817|AMELX_BOVIN Amelogenin, X isoform OS=Bos taurus OX=9913 GN=AMELX PE=1 SV=2	1	hf1_10472_ebo_24_1_261219.ScanId;v=1;d1=34758.34758.4	controllerType=0 controllerNumber=1 scan=34758	73.5613
34287:4	1	S.MPLP[+15.995]PHPGHPGYINF[+31.990]SY[+31.990]EVLTPLKWYQS.M		F[+32], P[+16], Y[+32]	837.91	4	3348.62	3348.6	0	4	17	Non	154.84	154.84	5.04	2.32	1304	>sp|P02817|AMELX_BOVIN Amelogenin, X isoform OS=Bos taurus OX=9913 GN=AMELX PE=1 SV=2	1	hf1_10472_ebo_24_1_261219.ScanId;v=1;d1=25362.25362.4	controllerType=0 controllerNumber=1 scan=25362	52.894
33404:4	1	S.M[+15.995]PLPP[+15.995]HPGHPGYINFS[+79.966]YEVLTPLKWYQS.M		M[+16], P[+16], S[+80]	845.906	4	3380.6	3380.59	0	5.5	17	Non	162.7	162.7	1.95	3.12	1304	>sp|P02817|AMELX_BOVIN Amelogenin, X isoform OS=Bos taurus OX=9913 GN=AMELX PE=1 SV=2	1	hf1_10472_ebo_24_1_261219.ScanId;v=1;d1=24775.24775.4	controllerType=0 controllerNumber=1 scan=24775	51.8308
34335:4	1	S.MP[+15.995]LPPHPGHPGYINF[+31.990]SY[+31.990]EVLTPLKWYQS.M		F[+32], P[+16], Y[+32]	837.909	4	3348.62	3348.6	0	3.7	17	Non	194.58	194.58	1.51	3.42	1304	>sp|P02817|AMELX_BOVIN Amelogenin, X isoform OS=Bos taurus OX=9913 GN=AMELX PE=1 SV=2	1	hf1_10472_ebo_24_1_261219.ScanId;v=1;d1=25396.25396.4	controllerType=0 controllerNumber=1 scan=25396	52.9568
32752:4	1	S.M[+15.995]PLPPHPGHPGYINFS[+79.966]Y[+15.995]EVLTPLKWYQS.M		M[+16], S[+80], Y[+16]	845.905	4	3380.6	3380.59	0	4.5	17	Non	204.15	204.15	8.01	3.31	1304	>sp|P02817|AMELX_BOVIN Amelogenin, X isoform OS=Bos taurus OX=9913 GN=AMELX PE=1 SV=2	1	hf1_10472_ebo_24_1_261219.ScanId;v=1;d1=24316.24316.4	controllerType=0 controllerNumber=1 scan=24316	50.999
31166:4	1	S.M[+15.995]PLPPHPGHPGYINFS[+79.966]YEVLTPLKW[+15.995]YQS.M		M[+16], S[+80], W[+16]	845.905	4	3380.6	3380.59	0	3.7	17	Non	204.63	204.63	5.15	3.62	1304	>sp|P02817|AMELX_BOVIN Amelogenin, X isoform OS=Bos taurus OX=9913 GN=AMELX PE=1 SV=2	1	hf1_10472_ebo_24_1_261219.ScanId;v=1;d1=23269.23269.4	controllerType=0 controllerNumber=1 scan=23269	49.1397
30833:3	1	S.MP[+15.995]LPPHPGHPGYINFS[+79.966]YEVLTPLK[+15.995]WYQS.M		K[+16], P[+16], S[+80]	1127.54	3	3380.61	3380.59	0	6.2	17	Non	207.74	207.74	4	4.22	1304	>sp|P02817|AMELX_BOVIN Amelogenin, X isoform OS=Bos taurus OX=9913 GN=AMELX PE=1 SV=2	1	hf1_10472_ebo_24_1_261219.ScanId;v=1;d1=23050.23050.3	controllerType=0 controllerNumber=1 scan=23050	48.7513
34035:4	1	S.MPLP[+15.995]PHPGHPGYINF[+31.990]SY[+31.990]EVLTPLKWYQS.M		F[+32], P[+16], Y[+32]	837.91	4	3348.62	3348.6	0	4.5	17	Non	210.27	210.27	8.22	3.87	1304	>sp|P02817|AMELX_BOVIN Amelogenin, X isoform OS=Bos taurus OX=9913 GN=AMELX PE=1 SV=2	1	hf1_10472_ebo_24_1_261219.ScanId;v=1;d1=25196.25196.4	controllerType=0 controllerNumber=1 scan=25196	52.6006
30110:4	1	S.MP[+15.995]LPPHPGHPGYINFS[+79.966]YEVLTPLKW[+31.990]YQS.M		P[+16], S[+80], W[+32]	849.905	4	3396.6	3396.58	0	5.9	17	Non	231.33	231.33	4	4.12	1304	>sp|P02817|AMELX_BOVIN Amelogenin, X isoform OS=Bos taurus OX=9913 GN=AMELX PE=1 SV=2	1	hf1_10472_ebo_24_1_261219.ScanId;v=1;d1=22578.22578.4	controllerType=0 controllerNumber=1 scan=22578	47.9164
30227:3	1	S.MP[+15.995]LPPHPGHPGYINFS[+79.966]YEVLTPLKW[+31.990]YQS.M		P[+16], S[+80], W[+32]	1132.87	3	3396.61	3396.58	0	8.6	17	Non	236.84	236.84	4	3.9	1304	>sp|P02817|AMELX_BOVIN Amelogenin, X isoform OS=Bos taurus OX=9913 GN=AMELX PE=1 SV=2	1	hf1_10472_ebo_24_1_261219.ScanId;v=1;d1=22655.22655.3	controllerType=0 controllerNumber=1 scan=22655	48.0507
31783:4	1	S.MP[+15.995]LPPHPGHPGYINFS[+79.966]YEVLTPLKWY[+31.990]QS.M		P[+16], S[+80], Y[+32]	849.906	4	3396.6	3396.58	0	6.2	17	Non	237.91	227.29	0	4.12	1304	>sp|P02817|AMELX_BOVIN Amelogenin, X isoform OS=Bos taurus OX=9913 GN=AMELX PE=1 SV=2	1	hf1_10472_ebo_24_1_261219.ScanId;v=1;d1=23673.23673.4	controllerType=0 controllerNumber=1 scan=23673	49.8541
33497:4	1	S.MP[+15.995]LPPHPGHPGYINFS[+79.966]YEVLTPLKWYQ[+0.984]S.M		P[+16], Q[+1], S[+80]	842.156	4	3365.6	3365.57	0	8.8	17	Non	260.65	260.65	4	4.78	1304	>sp|P02817|AMELX_BOVIN Amelogenin, X isoform OS=Bos taurus OX=9913 GN=AMELX PE=1 SV=2	1	hf1_10472_ebo_24_1_261219.ScanId;v=1;d1=24841.24841.4	controllerType=0 controllerNumber=1 scan=24841	51.9517
31472:4	1	S.MP[+15.995]LPPHPGHPGYINFS[+79.966]YEVLTPLKW[+15.995]YQS.M		P[+16], S[+80], W[+16]	845.906	4	3380.6	3380.59	0	4.9	17	Non	266.43	266.43	2.94	5.12	1304	>sp|P02817|AMELX_BOVIN Amelogenin, X isoform OS=Bos taurus OX=9913 GN=AMELX PE=1 SV=2	1	hf1_10472_ebo_24_1_261219.ScanId;v=1;d1=23465.23465.4	controllerType=0 controllerNumber=1 scan=23465	49.4827
30557:4	1	S.M[+15.995]PLPPHPGHPGYINFS[+79.966]YEVLTPLKW[+15.995]YQS.M		M[+16], S[+80], W[+16]	845.906	4	3380.6	3380.59	0	5.5	17	Non	269.42	269.42	0.87	5.12	1304	>sp|P02817|AMELX_BOVIN Amelogenin, X isoform OS=Bos taurus OX=9913 GN=AMELX PE=1 SV=2	1	hf1_10472_ebo_24_1_261219.ScanId;v=1;d1=22871.22871.4	controllerType=0 controllerNumber=1 scan=22871	48.4327
33792:4	1	S.MP[+15.995]LPPHPGHPGYIN[+0.984]FS[+79.966]YEVLTPLKWYQS.M		N[+1], P[+16], S[+80]	842.154	4	3365.6	3365.57	0	6.3	17	Non	286.04	286.04	4	5.85	1304	>sp|P02817|AMELX_BOVIN Amelogenin, X isoform OS=Bos taurus OX=9913 GN=AMELX PE=1 SV=2	1	hf1_10472_ebo_24_1_261219.ScanId;v=1;d1=25037.25037.4	controllerType=0 controllerNumber=1 scan=25037	52.3092
32033:3	1	S.MP[+15.995]LPPHPGHPGYINFS[+79.966]YEVLTPLKW[+15.995]YQS.M		P[+16], S[+80], W[+16]	1127.53	3	3380.59	3380.59	0	1.3	17	Non	417.66	417.66	0	6.14	1304	>sp|P02817|AMELX_BOVIN Amelogenin, X isoform OS=Bos taurus OX=9913 GN=AMELX PE=1 SV=2	1	hf1_10472_ebo_24_1_261219.ScanId;v=1;d1=23843.23843.3	controllerType=0 controllerNumber=1 scan=23843	50.1567
31135:3	1	S.M[+15.995]PLPPHPGHPGYINFS[+79.966]YEVLTPLKW[+15.995]YQS.M		M[+16], S[+80], W[+16]	1127.53	3	3380.59	3380.59	0	0.2	17	Non	447.68	447.68	0	6.56	1304	>sp|P02817|AMELX_BOVIN Amelogenin, X isoform OS=Bos taurus OX=9913 GN=AMELX PE=1 SV=2	1	hf1_10472_ebo_24_1_261219.ScanId;v=1;d1=23248.23248.3	controllerType=0 controllerNumber=1 scan=23248	49.1032
34391:3	1	S.M[+15.995]PLPPHPGHPGYINFS[+79.966]YEVLTPLKWYQ[+0.984]S.M		M[+16], Q[+1], S[+80]	1122.54	3	3365.59	3365.57	0	5.8	17	Non	575.63	511.98	10.04	7.86	1304	>sp|P02817|AMELX_BOVIN Amelogenin, X isoform OS=Bos taurus OX=9913 GN=AMELX PE=1 SV=2	1	hf1_10472_ebo_24_1_261219.ScanId;v=1;d1=25432.25432.3	controllerType=0 controllerNumber=1 scan=25432	53.0196
34088:3	1	S.MP[+15.995]LPPHPGHPGYIN[+0.984]FS[+79.966]YEVLTPLKWYQS.M		N[+1], P[+16], S[+80]	1122.54	3	3365.6	3365.57	0	7.7	17	Non	588.95	528.64	4	8.32	1304	>sp|P02817|AMELX_BOVIN Amelogenin, X isoform OS=Bos taurus OX=9913 GN=AMELX PE=1 SV=2	1	hf1_10472_ebo_24_1_261219.ScanId;v=1;d1=25233.25233.3	controllerType=0 controllerNumber=1 scan=25233	52.667
32333:3	1	S.M[+15.995]PLPPHPGHP[+15.995]GYINFS[+79.966]YEVLTPLKWYQS.M		M[+16], P[+16], S[+80]	1127.54	3	3380.61	3380.59	0	7.6	17	Non	591.61	591.61	1.22	8.32	1304	>sp|P02817|AMELX_BOVIN Amelogenin, X isoform OS=Bos taurus OX=9913 GN=AMELX PE=1 SV=2	1	hf1_10472_ebo_24_1_261219.ScanId;v=1;d1=24040.24040.3	controllerType=0 controllerNumber=1 scan=24040	50.5105
32640:3	1	S.M[+15.995]PLPPHPGHPGY[+15.995]INFS[+79.966]YEVLTPLKWYQS.M		M[+16], S[+80], Y[+16]	1127.54	3	3380.6	3380.59	0	4.6	17	Non	632.54	632.54	1.26	9.53	1304	>sp|P02817|AMELX_BOVIN Amelogenin, X isoform OS=Bos taurus OX=9913 GN=AMELX PE=1 SV=2	1	hf1_10472_ebo_24_1_261219.ScanId;v=1;d1=24238.24238.3	controllerType=0 controllerNumber=1 scan=24238	50.8596
31785:3	1	S.MP[+15.995]LPPHPGHPGYINFS[+79.966]YEVLTPLKW[+31.990]YQS.M		P[+16], S[+80], W[+32]	1132.87	3	3396.6	3396.58	0	7.2	17	Non	640.2	640.2	4	9.77	1304	>sp|P02817|AMELX_BOVIN Amelogenin, X isoform OS=Bos taurus OX=9913 GN=AMELX PE=1 SV=2	1	hf1_10472_ebo_24_1_261219.ScanId;v=1;d1=23674.23674.3	controllerType=0 controllerNumber=1 scan=23674	49.8557
30528:3	1	S.M[+15.995]PLPPHPGHPGYINFS[+79.966]YEVLTPLKW[+15.995]YQS.M		M[+16], S[+80], W[+16]	1127.54	3	3380.6	3380.59	0	5	17	Non	693.99	693.99	8.59	10.53	1304	>sp|P02817|AMELX_BOVIN Amelogenin, X isoform OS=Bos taurus OX=9913 GN=AMELX PE=1 SV=2	1	hf1_10472_ebo_24_1_261219.ScanId;v=1;d1=22851.22851.3	controllerType=0 controllerNumber=1 scan=22851	48.3969
31439:3	1	S.M[+15.995]PLPPHPGHPGYINFS[+79.966]YEVLTPLKW[+15.995]YQS.M		M[+16], S[+80], W[+16]	1127.54	3	3380.61	3380.59	0	6.5	17	Non	829.69	829.69	11.14	13.77	1304	>sp|P02817|AMELX_BOVIN Amelogenin, X isoform OS=Bos taurus OX=9913 GN=AMELX PE=1 SV=2	1	hf1_10472_ebo_24_1_261219.ScanId;v=1;d1=23444.23444.3	controllerType=0 controllerNumber=1 scan=23444	49.4457
33498:3	1	S.M[+15.995]PLPPHPGHPGYINFS[+79.966]YEVLTPLKWYQ[+0.984]S.M		M[+16], Q[+1], S[+80]	1122.54	3	3365.6	3365.57	0	8.2	17	Non	864.83	820.7	8.74	14.77	1304	>sp|P02817|AMELX_BOVIN Amelogenin, X isoform OS=Bos taurus OX=9913 GN=AMELX PE=1 SV=2	1	hf1_10472_ebo_24_1_261219.ScanId;v=1;d1=24843.24843.3	controllerType=0 controllerNumber=1 scan=24843	51.9575
33793:3	1	S.M[+15.995]PLPPHPGHPGYIN[+0.984]FS[+79.966]YEVLTPLKWYQS.M		M[+16], N[+1], S[+80]	1122.54	3	3365.6	3365.57	0	6.9	17	Non	916.02	859.14	8.05	15.77	1304	>sp|P02817|AMELX_BOVIN Amelogenin, X isoform OS=Bos taurus OX=9913 GN=AMELX PE=1 SV=2	1	hf1_10472_ebo_24_1_261219.ScanId;v=1;d1=25038.25038.3	controllerType=0 controllerNumber=1 scan=25038	52.3101
31665:4	1	S.M[+15.995]PLPPHPGHPGYINFSY[+31.990]EVLTPLKWY[+31.990]Q[+0.984]S.M		M[+16], Q[+1], Y[+32]*2	838.157	4	3349.61	3349.59	0	5.2	17	Non	94.44	83.47	0	2.18	1304	>sp|P02817|AMELX_BOVIN Amelogenin, X isoform OS=Bos taurus OX=9913 GN=AMELX PE=1 SV=2	1	hf1_10472_ebo_24_1_261219.ScanId;v=1;d1=23593.23593.6	controllerType=0 controllerNumber=1 scan=23593	49.7069
33153:4	1	S.M[+15.995]PLPPHPGHPGYINF[+31.990]SYEVLTP[+31.990]LKWYQ[+0.984]S.M		F[+32], M[+16], P[+32], Q[+1]	838.153	4	3349.59	3349.59	0	1.2	17	Non	148.92	148.92	6.1	1.33	1304	>sp|P02817|AMELX_BOVIN Amelogenin, X isoform OS=Bos taurus OX=9913 GN=AMELX PE=1 SV=2	1	hf1_10472_ebo_24_1_261219.ScanId;v=1;d1=24598.24598.4	controllerType=0 controllerNumber=1 scan=24598	51.5078
31786:3	1	S.MP[+15.995]LPPHPGHPGYIN[+0.984]FS[+79.966]YEVLTPLKW[+31.990]YQS.M		N[+1], P[+16], S[+80], W[+32]	1133.2	3	3397.59	3397.56	0	8.3	17	Non	437.06	437.06	4	6.19	1304	>sp|P02817|AMELX_BOVIN Amelogenin, X isoform OS=Bos taurus OX=9913 GN=AMELX PE=1 SV=2	1	hf1_10472_ebo_24_1_261219.ScanId;v=1;d1=23674.23674.3	controllerType=0 controllerNumber=1 scan=23674	49.8557
35460:3	1	S.MPLPPHPGHPGYINFS[+79.966]YEVLTPLKWYQSM[+15.995].I		M[+16], S[+80]	1165.88	3	3495.64	3495.63	0	1.6	17	Non	255.16	255.16	37.32	4.39	1304	>sp|P02817|AMELX_BOVIN Amelogenin, X isoform OS=Bos taurus OX=9913 GN=AMELX PE=1 SV=2	1	hf1_10472_ebo_24_1_261219.ScanId;v=1;d1=26152.26152.4	controllerType=0 controllerNumber=1 scan=26152	54.3497
34369:4	1	S.MPLPPHPGHPGYINFS[+79.966]YEVLTPLKWYQSM[+15.995].I		M[+16], S[+80]	874.668	4	3495.65	3495.63	0	5.3	17	Non	265.18	265.18	11.74	5.28	1304	>sp|P02817|AMELX_BOVIN Amelogenin, X isoform OS=Bos taurus OX=9913 GN=AMELX PE=1 SV=2	1	hf1_10472_ebo_24_1_261219.ScanId;v=1;d1=25418.25418.4	controllerType=0 controllerNumber=1 scan=25418	52.9955
35172:4	1	S.MPLPPHPGHPGYINFS[+79.966]YEVLTPLKWYQSM[+15.995].I		M[+16], S[+80]	874.663	4	3495.63	3495.63	0	-0.4	17	Non	321.91	321.91	10.4	5.01	1304	>sp|P02817|AMELX_BOVIN Amelogenin, X isoform OS=Bos taurus OX=9913 GN=AMELX PE=1 SV=2	1	hf1_10472_ebo_24_1_261219.ScanId;v=1;d1=25960.25960.4	controllerType=0 controllerNumber=1 scan=25960	53.9925
36333:4	1	S.M[+15.995]PLPPHPGHPGYINFS[+79.966]YEVLTPLKWYQSM.I		M[+16], S[+80]	874.668	4	3495.65	3495.63	0	5.9	17	Non	430.21	430.21	7.37	6.42	1304	>sp|P02817|AMELX_BOVIN Amelogenin, X isoform OS=Bos taurus OX=9913 GN=AMELX PE=1 SV=2	1	hf1_10472_ebo_24_1_261219.ScanId;v=1;d1=26716.26716.4	controllerType=0 controllerNumber=1 scan=26716	55.3556
36269:3	1	S.MP[+15.995]LPPHPGHPGYINFS[+79.966]YEVLTPLKWYQSM.I		P[+16], S[+80]	1165.89	3	3495.67	3495.63	0	9.9	17	Non	453.83	453.83	4	6.81	1304	>sp|P02817|AMELX_BOVIN Amelogenin, X isoform OS=Bos taurus OX=9913 GN=AMELX PE=1 SV=2	1	hf1_10472_ebo_24_1_261219.ScanId;v=1;d1=26674.26674.3	controllerType=0 controllerNumber=1 scan=26674	55.2806
34436:3	1	S.MPLPPHPGHPGYINFS[+79.966]YEVLTPLKWYQSM[+15.995].I		M[+16], S[+80]	1165.89	3	3495.65	3495.63	0	5.5	17	Non	627.82	627.82	49.25	9.53	1304	>sp|P02817|AMELX_BOVIN Amelogenin, X isoform OS=Bos taurus OX=9913 GN=AMELX PE=1 SV=2	1	hf1_10472_ebo_24_1_261219.ScanId;v=1;d1=25462.25462.3	controllerType=0 controllerNumber=1 scan=25462	53.0722
35800:3	1	S.M[+15.995]PLPPHPGHPGYINFS[+79.966]YEVLTPLKWYQSM[+15.995].I		M[+16]*2, S[+80]	1171.22	3	3511.63	3511.63	0	2.6	17	Non	65.62	65.62	0	2.24	1304	>sp|P02817|AMELX_BOVIN Amelogenin, X isoform OS=Bos taurus OX=9913 GN=AMELX PE=1 SV=2	1	hf1_10472_ebo_24_1_261219.ScanId;v=1;d1=26378.26378.3	controllerType=0 controllerNumber=1 scan=26378	54.7516
32883:4	1	S.MP[+15.995]LPPHPGHPGYINFS[+79.966]YEVLTP[+31.990]LKWYQSM.I		P[+16][+32], S[+80]	882.665	4	3527.64	3527.62	0	4.8	17	Non	92.18	92.18	0	2.18	1304	>sp|P02817|AMELX_BOVIN Amelogenin, X isoform OS=Bos taurus OX=9913 GN=AMELX PE=1 SV=2	1	hf1_10472_ebo_24_1_261219.ScanId;v=1;d1=24413.24413.4	controllerType=0 controllerNumber=1 scan=24413	51.1747
30540:5	1	S.MP[+15.995]LPPHPGHPGYINFS[+79.966]YEVLTPLKWYQSM[+31.990].I		M[+32], P[+16], S[+80]	706.333	5	3527.64	3527.62	0	4.5	17	Non	123.14	123.14	0	2.22	1304	>sp|P02817|AMELX_BOVIN Amelogenin, X isoform OS=Bos taurus OX=9913 GN=AMELX PE=1 SV=2	1	hf1_10472_ebo_24_1_261219.ScanId;v=1;d1=22858.22858.5	controllerType=0 controllerNumber=1 scan=22858	48.4075
35900:4	1	S.M[+15.995]PLPPHPGHPGYINFS[+79.966]YEVLTPLKWYQSM[+15.995].I		M[+16]*2, S[+80]	878.668	4	3511.65	3511.63	0	6.8	17	Non	152.25	152.25	0	2.54	1304	>sp|P02817|AMELX_BOVIN Amelogenin, X isoform OS=Bos taurus OX=9913 GN=AMELX PE=1 SV=2	1	hf1_10472_ebo_24_1_261219.ScanId;v=1;d1=26441.26441.4	controllerType=0 controllerNumber=1 scan=26441	54.8639
32557:4	1	S.MPLPPHPGHP[+31.990]GYINFS[+79.966]YEVLTPLKWYQSM[+15.995].I		M[+16], P[+32], S[+80]	882.666	4	3527.64	3527.62	0	6	17	Non	162.87	162.87	3.09	3.12	1304	>sp|P02817|AMELX_BOVIN Amelogenin, X isoform OS=Bos taurus OX=9913 GN=AMELX PE=1 SV=2	1	hf1_10472_ebo_24_1_261219.ScanId;v=1;d1=24183.24183.4	controllerType=0 controllerNumber=1 scan=24183	50.7634
35387:3	1	S.MPLPPHPGHPGYINFS[+79.966]YEVLTPLKWYQ[+0.984]SM[+15.995].I		M[+16], Q[+1], S[+80]	1166.22	3	3496.63	3496.61	0	5.2	17	Non	173.38	173.38	15.79	3.78	1304	>sp|P02817|AMELX_BOVIN Amelogenin, X isoform OS=Bos taurus OX=9913 GN=AMELX PE=1 SV=2	1	hf1_10472_ebo_24_1_261219.ScanId;v=1;d1=26105.26105.3	controllerType=0 controllerNumber=1 scan=26105	54.2645
35331:4	1	S.M[+15.995]PLPPHPGHPGYINFS[+79.966]YEVLTPLKWYQSM[+15.995].I		M[+16]*2, S[+80]	878.659	4	3511.62	3511.63	0	-2.9	17	Non	183.4	183.4	0	2.4	1304	>sp|P02817|AMELX_BOVIN Amelogenin, X isoform OS=Bos taurus OX=9913 GN=AMELX PE=1 SV=2	1	hf1_10472_ebo_24_1_261219.ScanId;v=1;d1=26067.26067.4	controllerType=0 controllerNumber=1 scan=26067	54.19
37614:4	1	S.MP[+15.995]LPPHPGHPGYINFS[+79.966]YEVLTPLKWYQ[+0.984]SM.I		P[+16], Q[+1], S[+80]	874.915	4	3496.64	3496.61	0	6.3	17	Non	193.93	193.93	13.66	3.9	1304	>sp|P02817|AMELX_BOVIN Amelogenin, X isoform OS=Bos taurus OX=9913 GN=AMELX PE=1 SV=2	1	hf1_10472_ebo_24_1_261219.ScanId;v=1;d1=27550.27550.4	controllerType=0 controllerNumber=1 scan=27550	56.8662
33369:5	1	S.MP[+15.995]LPPHPGHPGYINFS[+79.966]YEVLTPLKWYQSM[+15.995].I		M[+16], P[+16], S[+80]	703.135	5	3511.65	3511.63	0	6.1	17	Non	215.65	215.65	0	3.47	1304	>sp|P02817|AMELX_BOVIN Amelogenin, X isoform OS=Bos taurus OX=9913 GN=AMELX PE=1 SV=2	1	hf1_10472_ebo_24_1_261219.ScanId;v=1;d1=24749.24749.5	controllerType=0 controllerNumber=1 scan=24749	51.7811
37323:4	1	S.MP[+15.995]LPPHPGHPGYIN[+0.984]FS[+79.966]YEVLTPLKWYQSM.I		N[+1], P[+16], S[+80]	874.914	4	3496.64	3496.61	0	5.9	17	Non	229.35	229.35	5.8	4.12	1304	>sp|P02817|AMELX_BOVIN Amelogenin, X isoform OS=Bos taurus OX=9913 GN=AMELX PE=1 SV=2	1	hf1_10472_ebo_24_1_261219.ScanId;v=1;d1=27362.27362.4	controllerType=0 controllerNumber=1 scan=27362	56.5223
32771:3	1	S.M[+15.995]PLPPHPGHPGYINFS[+79.966]YEVLTPLKWYQSM[+31.990].I		M[+16][+32], S[+80]	1176.56	3	3527.65	3527.62	0	9.1	17	Non	230.32	230.32	0	3.65	1304	>sp|P02817|AMELX_BOVIN Amelogenin, X isoform OS=Bos taurus OX=9913 GN=AMELX PE=1 SV=2	1	hf1_10472_ebo_24_1_261219.ScanId;v=1;d1=24332.24332.3	controllerType=0 controllerNumber=1 scan=24332	51.0281
32813:5	1	S.M[+15.995]PLPPHPGHPGYINFS[+79.966]YEVLTPLKWYQSM[+15.995].I		M[+16]*2, S[+80]	703.133	5	3511.64	3511.63	0	3	17	Non	241.4	241.4	0	4.2	1304	>sp|P02817|AMELX_BOVIN Amelogenin, X isoform OS=Bos taurus OX=9913 GN=AMELX PE=1 SV=2	1	hf1_10472_ebo_24_1_261219.ScanId;v=1;d1=24360.24360.5	controllerType=0 controllerNumber=1 scan=24360	51.077
30485:4	1	S.MP[+15.995]LPPHPGHPGYINFS[+79.966]YEVLTPLKWYQSM[+31.990].I		M[+32], P[+16], S[+80]	882.665	4	3527.64	3527.62	0	4.9	17	Non	259.6	259.6	0	5.12	1304	>sp|P02817|AMELX_BOVIN Amelogenin, X isoform OS=Bos taurus OX=9913 GN=AMELX PE=1 SV=2	1	hf1_10472_ebo_24_1_261219.ScanId;v=1;d1=22822.22822.4	controllerType=0 controllerNumber=1 scan=22822	48.3455
35173:4	1	S.MPLPPHPGHPGYIN[+0.984]FS[+79.966]YEVLTPLKWYQSM[+15.995].I		M[+16], N[+1], S[+80]	874.913	4	3496.63	3496.61	0	5	17	Non	279.29	262.12	32.57	4.87	1304	>sp|P02817|AMELX_BOVIN Amelogenin, X isoform OS=Bos taurus OX=9913 GN=AMELX PE=1 SV=2	1	hf1_10472_ebo_24_1_261219.ScanId;v=1;d1=25960.25960.4	controllerType=0 controllerNumber=1 scan=25960	53.9925
33094:5	1	S.M[+15.995]PLPPHPGHPGYINFS[+79.966]YEVLTPLKWYQSM[+15.995].I		M[+16]*2, S[+80]	703.135	5	3511.64	3511.63	0	5.5	17	Non	306.29	306.29	0	4.94	1304	>sp|P02817|AMELX_BOVIN Amelogenin, X isoform OS=Bos taurus OX=9913 GN=AMELX PE=1 SV=2	1	hf1_10472_ebo_24_1_261219.ScanId;v=1;d1=24553.24553.5	controllerType=0 controllerNumber=1 scan=24553	51.4251
31376:4	1	S.MP[+15.995]LPPHPGHPGYINFS[+79.966]YEVLTPLKWYQSM[+31.990].I		M[+32], P[+16], S[+80]	882.665	4	3527.64	3527.62	0	4.9	17	Non	309.53	309.53	0	5.61	1304	>sp|P02817|AMELX_BOVIN Amelogenin, X isoform OS=Bos taurus OX=9913 GN=AMELX PE=1 SV=2	1	hf1_10472_ebo_24_1_261219.ScanId;v=1;d1=23400.23400.4	controllerType=0 controllerNumber=1 scan=23400	49.3685
32691:3	1	S.MP[+15.995]LPPHPGHPGYINFS[+79.966]YEVLTPLKWYQSM[+15.995].I		M[+16], P[+16], S[+80]	1171.21	3	3511.63	3511.63	0	0.3	17	Non	310.39	310.39	1.8	5.14	1304	>sp|P02817|AMELX_BOVIN Amelogenin, X isoform OS=Bos taurus OX=9913 GN=AMELX PE=1 SV=2	1	hf1_10472_ebo_24_1_261219.ScanId;v=1;d1=24274.24274.3	controllerType=0 controllerNumber=1 scan=24274	50.9237
30769:4	1	S.MP[+15.995]LPPHPGHPGYINFS[+79.966]YEVLTPLKWYQSM[+31.990].I		M[+32], P[+16], S[+80]	882.665	4	3527.64	3527.62	0	4.9	17	Non	311.96	311.96	0	5.45	1304	>sp|P02817|AMELX_BOVIN Amelogenin, X isoform OS=Bos taurus OX=9913 GN=AMELX PE=1 SV=2	1	hf1_10472_ebo_24_1_261219.ScanId;v=1;d1=23011.23011.4	controllerType=0 controllerNumber=1 scan=23011	48.6844
31675:4	1	S.MP[+15.995]LPPHPGHPGYINFS[+79.966]YEVLTPLKWYQSM[+31.990].I		M[+32], P[+16], S[+80]	882.665	4	3527.64	3527.62	0	4.6	17	Non	318.89	318.89	0	5.61	1304	>sp|P02817|AMELX_BOVIN Amelogenin, X isoform OS=Bos taurus OX=9913 GN=AMELX PE=1 SV=2	1	hf1_10472_ebo_24_1_261219.ScanId;v=1;d1=23599.23599.4	controllerType=0 controllerNumber=1 scan=23599	49.7187
37604:3	1	S.MP[+15.995]LPPHPGHPGYINFS[+79.966]YEVLTPLKWYQ[+0.984]SM.I		P[+16], Q[+1], S[+80]	1166.22	3	3496.64	3496.61	0	7.9	17	Non	323.74	323.74	4	5.94	1304	>sp|P02817|AMELX_BOVIN Amelogenin, X isoform OS=Bos taurus OX=9913 GN=AMELX PE=1 SV=2	1	hf1_10472_ebo_24_1_261219.ScanId;v=1;d1=27543.27543.3	controllerType=0 controllerNumber=1 scan=27543	56.8527
32829:4	1	S.M[+15.995]PLPPHPGHPGYINFS[+79.966]YEVLTPLKWYQSM[+15.995].I		M[+16]*2, S[+80]	878.666	4	3511.64	3511.63	0	5.2	17	Non	338.4	338.4	0	5.59	1304	>sp|P02817|AMELX_BOVIN Amelogenin, X isoform OS=Bos taurus OX=9913 GN=AMELX PE=1 SV=2	1	hf1_10472_ebo_24_1_261219.ScanId;v=1;d1=24373.24373.4	controllerType=0 controllerNumber=1 scan=24373	51.1021
47238:3	1	S.M[+15.995]PLPPHPGHPGYINFS[+79.966]YEVLTPLKWYQSM[+15.995].I		M[+16]*2, S[+80]	1171.22	3	3511.66	3511.63	0	9.7	17	Non	359.76	359.76	0	5.36	1304	>sp|P02817|AMELX_BOVIN Amelogenin, X isoform OS=Bos taurus OX=9913 GN=AMELX PE=1 SV=2	1	hf1_10472_ebo_24_1_261219.ScanId;v=1;d1=34800.34800.3	controllerType=0 controllerNumber=1 scan=34800	73.6356
33264:4	1	S.M[+15.995]PLPPHPGHPGYINFS[+79.966]YEVLTPLKWYQSM[+15.995].I		M[+16]*2, S[+80]	878.667	4	3511.65	3511.63	0	5.8	17	Non	365.29	365.29	21.27	6.51	1304	>sp|P02817|AMELX_BOVIN Amelogenin, X isoform OS=Bos taurus OX=9913 GN=AMELX PE=1 SV=2	1	hf1_10472_ebo_24_1_261219.ScanId;v=1;d1=24675.24675.4	controllerType=0 controllerNumber=1 scan=24675	51.6499
47219:4	1	S.M[+15.995]PLPPHPGHPGYINFS[+79.966]YEVLTPLKWYQSM[+15.995].I		M[+16]*2, S[+80]	878.668	4	3511.65	3511.63	0	7.3	17	Non	376.11	376.11	0	6.9	1304	>sp|P02817|AMELX_BOVIN Amelogenin, X isoform OS=Bos taurus OX=9913 GN=AMELX PE=1 SV=2	1	hf1_10472_ebo_24_1_261219.ScanId;v=1;d1=34786.34786.4	controllerType=0 controllerNumber=1 scan=34786	73.6115
33106:4	1	S.M[+15.995]PLPPHPGHPGYINFS[+79.966]YEVLTPLKWYQSM[+15.995].I		M[+16]*2, S[+80]	878.667	4	3511.64	3511.63	0	5.5	17	Non	390.55	390.55	21.63	6.51	1304	>sp|P02817|AMELX_BOVIN Amelogenin, X isoform OS=Bos taurus OX=9913 GN=AMELX PE=1 SV=2	1	hf1_10472_ebo_24_1_261219.ScanId;v=1;d1=24563.24563.4	controllerType=0 controllerNumber=1 scan=24563	51.4454
33375:4	1	S.M[+15.995]PLPPHPGHPGYINFS[+79.966]YEVLTPLKWYQSM[+15.995].I		M[+16]*2, S[+80]	878.667	4	3511.65	3511.63	0	6.2	17	Non	393.5	393.5	0	6.75	1304	>sp|P02817|AMELX_BOVIN Amelogenin, X isoform OS=Bos taurus OX=9913 GN=AMELX PE=1 SV=2	1	hf1_10472_ebo_24_1_261219.ScanId;v=1;d1=24753.24753.4	controllerType=0 controllerNumber=1 scan=24753	51.7899
32222:3	1	S.M[+15.995]PLPPHPGHPGYINFS[+79.966]YEVLTPLKWYQSM[+31.990].I		M[+16][+32], S[+80]	1176.55	3	3527.63	3527.62	0	1.9	17	Non	395.42	395.42	0	5.77	1304	>sp|P02817|AMELX_BOVIN Amelogenin, X isoform OS=Bos taurus OX=9913 GN=AMELX PE=1 SV=2	1	hf1_10472_ebo_24_1_261219.ScanId;v=1;d1=23967.23967.6	controllerType=0 controllerNumber=1 scan=23967	50.3821
34645:3	1	S.M[+15.995]PLPPHPGHPGYINFS[+79.966]YEVLTPLKWYQSM[+15.995].I		M[+16]*2, S[+80]	1171.21	3	3511.63	3511.63	0	1.3	17	Non	403.33	403.33	0	6.14	1304	>sp|P02817|AMELX_BOVIN Amelogenin, X isoform OS=Bos taurus OX=9913 GN=AMELX PE=1 SV=2	1	hf1_10472_ebo_24_1_261219.ScanId;v=1;d1=25605.25605.3	controllerType=0 controllerNumber=1 scan=25605	53.3322
34031:3	1	S.M[+15.995]PLPPHPGHPGYINFS[+79.966]YEVLTPLKWYQSM[+31.990].I		M[+16][+32], S[+80]	1176.55	3	3527.64	3527.62	0	5.3	17	Non	404.96	404.96	2.02	6.73	1304	>sp|P02817|AMELX_BOVIN Amelogenin, X isoform OS=Bos taurus OX=9913 GN=AMELX PE=1 SV=2	1	hf1_10472_ebo_24_1_261219.ScanId;v=1;d1=25193.25193.3	controllerType=0 controllerNumber=1 scan=25193	52.5937
33641:4	1	S.M[+15.995]PLPPHPGHPGYINFS[+79.966]YEVLTPLKWYQSM[+15.995].I		M[+16]*2, S[+80]	878.667	4	3511.65	3511.63	0	6.1	17	Non	420.22	420.22	0	6.42	1304	>sp|P02817|AMELX_BOVIN Amelogenin, X isoform OS=Bos taurus OX=9913 GN=AMELX PE=1 SV=2	1	hf1_10472_ebo_24_1_261219.ScanId;v=1;d1=24938.24938.4	controllerType=0 controllerNumber=1 scan=24938	52.1346
32490:3	1	S.M[+15.995]PLPPHPGHPGYINFS[+79.966]YEVLTP[+31.990]LKWYQSM.I		M[+16], P[+32], S[+80]	1176.56	3	3527.65	3527.62	0	9.3	17	Non	529.63	529.63	11.83	6.71	1304	>sp|P02817|AMELX_BOVIN Amelogenin, X isoform OS=Bos taurus OX=9913 GN=AMELX PE=1 SV=2	1	hf1_10472_ebo_24_1_261219.ScanId;v=1;d1=24141.24141.3	controllerType=0 controllerNumber=1 scan=24141	50.6876
31259:3	1	S.MP[+15.995]LPPHPGHPGYINFS[+79.966]YEVLTPLKWYQSM[+31.990].I		M[+32], P[+16], S[+80]	1176.55	3	3527.64	3527.62	0	4.7	17	Non	618.57	618.57	0	8.86	1304	>sp|P02817|AMELX_BOVIN Amelogenin, X isoform OS=Bos taurus OX=9913 GN=AMELX PE=1 SV=2	1	hf1_10472_ebo_24_1_261219.ScanId;v=1;d1=23327.23327.3	controllerType=0 controllerNumber=1 scan=23327	49.2399
31573:3	1	S.M[+15.995]PLPPHPGHPGYINFS[+79.966]YEVLTPLKWYQSM[+31.990].I		M[+16][+32], S[+80]	1176.55	3	3527.64	3527.62	0	6.1	17	Non	720.12	720.12	0	11.53	1304	>sp|P02817|AMELX_BOVIN Amelogenin, X isoform OS=Bos taurus OX=9913 GN=AMELX PE=1 SV=2	1	hf1_10472_ebo_24_1_261219.ScanId;v=1;d1=23532.23532.3	controllerType=0 controllerNumber=1 scan=23532	49.5996
30441:3	1	S.M[+15.995]PLPPHPGHPGYINFS[+79.966]YEVLTPLKWYQSM[+31.990].I		M[+16][+32], S[+80]	1176.55	3	3527.65	3527.62	0	7.8	17	Non	870.96	870.96	0	14.77	1304	>sp|P02817|AMELX_BOVIN Amelogenin, X isoform OS=Bos taurus OX=9913 GN=AMELX PE=1 SV=2	1	hf1_10472_ebo_24_1_261219.ScanId;v=1;d1=22793.22793.3	controllerType=0 controllerNumber=1 scan=22793	48.2941
32963:3	1	S.M[+15.995]PLPPHPGHPGYINFS[+79.966]YEVLTPLKWYQSM[+15.995].I		M[+16]*2, S[+80]	1171.22	3	3511.65	3511.63	0	6	17	Non	906.67	906.67	10.28	15.53	1304	>sp|P02817|AMELX_BOVIN Amelogenin, X isoform OS=Bos taurus OX=9913 GN=AMELX PE=1 SV=2	1	hf1_10472_ebo_24_1_261219.ScanId;v=1;d1=24466.24466.3	controllerType=0 controllerNumber=1 scan=24466	51.2689
33238:3	1	S.M[+15.995]PLPPHPGHPGYINFS[+79.966]YEVLTPLKWYQSM[+15.995].I		M[+16]*2, S[+80]	1171.22	3	3511.65	3511.63	0	6.3	17	Non	909.15	909.15	0	15.77	1304	>sp|P02817|AMELX_BOVIN Amelogenin, X isoform OS=Bos taurus OX=9913 GN=AMELX PE=1 SV=2	1	hf1_10472_ebo_24_1_261219.ScanId;v=1;d1=24655.24655.3	controllerType=0 controllerNumber=1 scan=24655	51.6123
33496:3	1	S.M[+15.995]PLPPHPGHPGYINFS[+79.966]YEVLTPLKWYQSM[+15.995].I		M[+16]*2, S[+80]	1171.22	3	3511.65	3511.63	0	7.8	17	Non	992.12	992.12	0	16.77	1304	>sp|P02817|AMELX_BOVIN Amelogenin, X isoform OS=Bos taurus OX=9913 GN=AMELX PE=1 SV=2	1	hf1_10472_ebo_24_1_261219.ScanId;v=1;d1=24840.24840.3	controllerType=0 controllerNumber=1 scan=24840	51.9511
34394:3	1	S.MP[+15.995]LPPHPGHPGYINF[+31.990]S[+79.966]YEVLTPLKWYQ[+0.984]SM.I		F[+32], P[+16], Q[+1], S[+80]	1176.88	3	3528.63	3528.6	0	8.4	17	Non	54.56	54.56	4	1.28	1304	>sp|P02817|AMELX_BOVIN Amelogenin, X isoform OS=Bos taurus OX=9913 GN=AMELX PE=1 SV=2	1	hf1_10472_ebo_24_1_261219.ScanId;v=1;d1=25433.25433.3	controllerType=0 controllerNumber=1 scan=25433	53.0211
31953:4	1	S.MP[+15.995]LPPHPGHPGYINFS[+79.966]YEVLTPLKWY[+31.990]Q[+0.984]SM.I		P[+16], Q[+1], S[+80], Y[+32]	882.912	4	3528.63	3528.6	0	6.3	17	Non	145.05	145.05	0	2.54	1304	>sp|P02817|AMELX_BOVIN Amelogenin, X isoform OS=Bos taurus OX=9913 GN=AMELX PE=1 SV=2	1	hf1_10472_ebo_24_1_261219.ScanId;v=1;d1=23786.23786.4	controllerType=0 controllerNumber=1 scan=23786	50.0574
33546:4	1	S.M[+31.990]PLPPHPGHPGYIN[+0.984]FS[+79.966]YEVLTPLKWYQSM[+15.995].I		M[+16][+32], N[+1], S[+80]	882.915	4	3528.64	3528.6	0	9.1	17	Non	156.72	156.72	9.04	2.29	1304	>sp|P02817|AMELX_BOVIN Amelogenin, X isoform OS=Bos taurus OX=9913 GN=AMELX PE=1 SV=2	1	hf1_10472_ebo_24_1_261219.ScanId;v=1;d1=24876.24876.4	controllerType=0 controllerNumber=1 scan=24876	52.0186
35963:3	1	S.M[+15.995]PLPPHPGHPGYINF[+31.990]SY[+31.990]EVLTPLKWYQSM[+15.995].I		F[+32], M[+16]*2, Y[+32]	1165.88	3	3495.62	3495.64	0	-5.9	17	Non	170.37	170.37	0	2.84	1304	>sp|P02817|AMELX_BOVIN Amelogenin, X isoform OS=Bos taurus OX=9913 GN=AMELX PE=1 SV=2	1	hf1_10472_ebo_24_1_261219.ScanId;v=1;d1=26480.26480.3	controllerType=0 controllerNumber=1 scan=26480	54.9347
31070:4	1	S.MP[+15.995]LPPHPGHPGYIN[+0.984]FS[+79.966]YEVLTPLKWYQSM[+31.990].I		M[+32], N[+1], P[+16], S[+80]	882.913	4	3528.63	3528.6	0	7	17	Non	199.12	199.12	0	3.9	1304	>sp|P02817|AMELX_BOVIN Amelogenin, X isoform OS=Bos taurus OX=9913 GN=AMELX PE=1 SV=2	1	hf1_10472_ebo_24_1_261219.ScanId;v=1;d1=23203.23203.4	controllerType=0 controllerNumber=1 scan=23203	49.0253
29997:4	1	S.M[+15.995]PLPPHPGHPGYINFS[+79.966]YEVLTPLKW[+31.990]YQSM[+15.995].I		M[+16]*2, S[+80], W[+32]	886.665	4	3543.64	3543.62	0	6.5	17	Non	219.46	219.46	0	4.1	1304	>sp|P02817|AMELX_BOVIN Amelogenin, X isoform OS=Bos taurus OX=9913 GN=AMELX PE=1 SV=2	1	hf1_10472_ebo_24_1_261219.ScanId;v=1;d1=22505.22505.4	controllerType=0 controllerNumber=1 scan=22505	47.7867
34061:4	1	S.MP[+15.995]LPPHPGHPGYINF[+31.990]SY[+31.990]EVLTPLKWYQSM[+15.995].I		F[+32], M[+16], P[+16], Y[+32]	874.668	4	3495.65	3495.64	0	3.1	17	Non	227.71	227.71	1.8	3.62	1304	>sp|P02817|AMELX_BOVIN Amelogenin, X isoform OS=Bos taurus OX=9913 GN=AMELX PE=1 SV=2	1	hf1_10472_ebo_24_1_261219.ScanId;v=1;d1=25216.25216.4	controllerType=0 controllerNumber=1 scan=25216	52.6364
34837:3	1	S.M[+15.995]PLPPHPGHP[+31.990]GYINF[+31.990]SYEVLTPLKWYQSM[+15.995].I		F[+32], M[+16]*2, P[+32]	1165.89	3	3495.64	3495.64	0	1.2	17	Non	231.45	231.45	0	3.66	1304	>sp|P02817|AMELX_BOVIN Amelogenin, X isoform OS=Bos taurus OX=9913 GN=AMELX PE=1 SV=2	1	hf1_10472_ebo_24_1_261219.ScanId;v=1;d1=25732.25732.3	controllerType=0 controllerNumber=1 scan=25732	53.5667
32249:4	1	S.M[+15.995]PLPPHPGHPGYINFS[+79.966]YEVLTPLKW[+31.990]YQ[+0.984]SM.I		M[+16], Q[+1], S[+80], W[+32]	882.913	4	3528.63	3528.6	0	7	17	Non	250.91	250.91	0	5.36	1304	>sp|P02817|AMELX_BOVIN Amelogenin, X isoform OS=Bos taurus OX=9913 GN=AMELX PE=1 SV=2	1	hf1_10472_ebo_24_1_261219.ScanId;v=1;d1=23983.23983.4	controllerType=0 controllerNumber=1 scan=23983	50.4118
33661:3	1	S.M[+31.990]PLPPHPGHPGYIN[+0.984]FS[+79.966]YEVLTPLKWYQSM[+15.995].I		M[+16][+32], N[+1], S[+80]	1176.88	3	3528.63	3528.6	0	7.8	17	Non	253.63	253.63	0	5.47	1304	>sp|P02817|AMELX_BOVIN Amelogenin, X isoform OS=Bos taurus OX=9913 GN=AMELX PE=1 SV=2	1	hf1_10472_ebo_24_1_261219.ScanId;v=1;d1=24950.24950.3	controllerType=0 controllerNumber=1 scan=24950	52.1555
30352:3	1	S.M[+15.995]PLPPHPGHPGYINFS[+79.966]YEVLTP[+31.990]LKWYQSM[+15.995].I		M[+16]*2, P[+32], S[+80]	1181.88	3	3543.64	3543.62	0	6	17	Non	282.13	282.13	0	5.57	1304	>sp|P02817|AMELX_BOVIN Amelogenin, X isoform OS=Bos taurus OX=9913 GN=AMELX PE=1 SV=2	1	hf1_10472_ebo_24_1_261219.ScanId;v=1;d1=22734.22734.3	controllerType=0 controllerNumber=1 scan=22734	48.192
30300:4	1	S.M[+15.995]PLPPHPGHPGYINFS[+79.966]YEVLTPLKW[+31.990]YQSM[+15.995].I		M[+16]*2, S[+80], W[+32]	886.664	4	3543.63	3543.62	0	5.2	17	Non	285.54	285.54	0	5.45	1304	>sp|P02817|AMELX_BOVIN Amelogenin, X isoform OS=Bos taurus OX=9913 GN=AMELX PE=1 SV=2	1	hf1_10472_ebo_24_1_261219.ScanId;v=1;d1=22699.22699.4	controllerType=0 controllerNumber=1 scan=22699	48.1282
31898:4	1	S.M[+15.995]PLPPHPGHPGYINFS[+79.966]YEVLTPLKW[+31.990]YQSM[+15.995].I		M[+16]*2, S[+80], W[+32]	886.663	4	3543.63	3543.62	0	4.1	17	Non	344.03	344.03	0	5.49	1304	>sp|P02817|AMELX_BOVIN Amelogenin, X isoform OS=Bos taurus OX=9913 GN=AMELX PE=1 SV=2	1	hf1_10472_ebo_24_1_261219.ScanId;v=1;d1=23751.23751.4	controllerType=0 controllerNumber=1 scan=23751	49.991
32029:3	1	S.M[+15.995]PLPPHPGHPGYINFS[+79.966]YEVLTPLKW[+31.990]YQ[+0.984]SM.I		M[+16], Q[+1], S[+80], W[+32]	1176.88	3	3528.63	3528.6	0	8.5	17	Non	386.55	386.55	0	6.71	1304	>sp|P02817|AMELX_BOVIN Amelogenin, X isoform OS=Bos taurus OX=9913 GN=AMELX PE=1 SV=2	1	hf1_10472_ebo_24_1_261219.ScanId;v=1;d1=23839.23839.3	controllerType=0 controllerNumber=1 scan=23839	50.1479
30053:3	1	S.M[+15.995]PLPPHPGHPGYINFS[+79.966]YEVLTPLKW[+31.990]YQSM[+15.995].I		M[+16]*2, S[+80], W[+32]	1181.89	3	3543.64	3543.62	0	8	17	Non	639.13	639.13	0	9.77	1304	>sp|P02817|AMELX_BOVIN Amelogenin, X isoform OS=Bos taurus OX=9913 GN=AMELX PE=1 SV=2	1	hf1_10472_ebo_24_1_261219.ScanId;v=1;d1=22542.22542.3	controllerType=0 controllerNumber=1 scan=22542	47.8511
31632:3	1	S.M[+15.995]PLPPHPGHPGYINFS[+79.966]YEVLTPLKW[+31.990]YQSM[+15.995].I		M[+16]*2, S[+80], W[+32]	1181.88	3	3543.64	3543.62	0	6.4	17	Non	793.19	793.19	6.15	12.77	1304	>sp|P02817|AMELX_BOVIN Amelogenin, X isoform OS=Bos taurus OX=9913 GN=AMELX PE=1 SV=2	1	hf1_10472_ebo_24_1_261219.ScanId;v=1;d1=23569.23569.3	controllerType=0 controllerNumber=1 scan=23569	49.6627
37935:4	1	S.MPLPPHPGHPGYINFS[+79.966]YEVLTPLKWYQSMIR.H		S[+80]	937.968	4	3748.85	3748.82	0	8.4	17	NRagged	290.98	290.98	20.05	6.09	1304	>sp|P02817|AMELX_BOVIN Amelogenin, X isoform OS=Bos taurus OX=9913 GN=AMELX PE=1 SV=2	1	hf1_10472_ebo_24_1_261219.ScanId;v=1;d1=27746.27746.4	controllerType=0 controllerNumber=1 scan=27746	57.2147
33752:4	1	S.MPLPPHPGHPGYINFS[+79.966]YEVLTPLKWYQSM[+15.995]IR.H		M[+16], S[+80]	941.967	4	3764.85	3764.82	0	8.6	17	NRagged	374.54	374.54	29.51	7.34	1304	>sp|P02817|AMELX_BOVIN Amelogenin, X isoform OS=Bos taurus OX=9913 GN=AMELX PE=1 SV=2	1	hf1_10472_ebo_24_1_261219.ScanId;v=1;d1=25010.25010.4	controllerType=0 controllerNumber=1 scan=25010	52.2601
37012:5	1	S.MP[+15.995]LPPHPGHPGYINFS[+79.966]YEVLTPLKWYQSMIR.H		P[+16], S[+80]	753.772	5	3764.83	3764.82	0	3.6	17	NRagged	375.91	375.91	4	7.99	1304	>sp|P02817|AMELX_BOVIN Amelogenin, X isoform OS=Bos taurus OX=9913 GN=AMELX PE=1 SV=2	1	hf1_10472_ebo_24_1_261219.ScanId;v=1;d1=27157.27157.5	controllerType=0 controllerNumber=1 scan=27157	56.1553
33846:5	1	S.MPLPPHPGHPGYINFS[+79.966]YEVLTPLKWYQSM[+15.995]IR.H		M[+16], S[+80]	753.774	5	3764.84	3764.82	0	6.9	17	NRagged	434.97	434.97	13.52	7.95	1304	>sp|P02817|AMELX_BOVIN Amelogenin, X isoform OS=Bos taurus OX=9913 GN=AMELX PE=1 SV=2	1	hf1_10472_ebo_24_1_261219.ScanId;v=1;d1=25068.25068.5	controllerType=0 controllerNumber=1 scan=25068	52.3604
35362:4	1	S.MPLPPHPGHPGYINFS[+79.966]YEVLTPLKWYQSM[+15.995]IR.H		M[+16], S[+80]	941.962	4	3764.83	3764.82	0	2.6	17	NRagged	647.07	647.07	47.61	9.69	1304	>sp|P02817|AMELX_BOVIN Amelogenin, X isoform OS=Bos taurus OX=9913 GN=AMELX PE=1 SV=2	1	hf1_10472_ebo_24_1_261219.ScanId;v=1;d1=26086.26086.4	controllerType=0 controllerNumber=1 scan=26086	54.2272
31203:4	1	S.M[+15.995]PLPPHPGHPGYINFSYEVLTPLKWYQSM[+15.995]IR.H		M[+16]*2	925.972	4	3700.87	3700.84	0	6.3	17	NRagged	713.5	713.5	0	12.63	1304	>sp|P02817|AMELX_BOVIN Amelogenin, X isoform OS=Bos taurus OX=9913 GN=AMELX PE=1 SV=2	1	hf1_10472_ebo_24_1_261219.ScanId;v=1;d1=23293.23293.4	controllerType=0 controllerNumber=1 scan=23293	49.1805
31177:5	1	S.M[+15.995]PLPPHPGHPGYINFSYEVLTPLKWYQSM[+15.995]IR.H		M[+16]*2	740.98	5	3700.87	3700.84	0	6.5	17	NRagged	737.19	737.19	0	12.52	1304	>sp|P02817|AMELX_BOVIN Amelogenin, X isoform OS=Bos taurus OX=9913 GN=AMELX PE=1 SV=2	1	hf1_10472_ebo_24_1_261219.ScanId;v=1;d1=23276.23276.5	controllerType=0 controllerNumber=1 scan=23276	49.1503
37113:4	1	S.M[+15.995]PLPPHPGHPGYINFS[+79.966]YEVLTPLKWYQSMIR.H		M[+16], S[+80]	941.965	4	3764.84	3764.82	0	6.4	17	NRagged	1012.81	1012.81	41.6	18.63	1304	>sp|P02817|AMELX_BOVIN Amelogenin, X isoform OS=Bos taurus OX=9913 GN=AMELX PE=1 SV=2	1	hf1_10472_ebo_24_1_261219.ScanId;v=1;d1=27225.27225.4	controllerType=0 controllerNumber=1 scan=27225	56.2783
34037:4	1	S.MPLPPHPGHPGYINFS[+79.966]YEVLTPLKWYQSM[+15.995]IR.H		M[+16], S[+80]	941.966	4	3764.84	3764.82	0	6.5	17	NRagged	1080.53	1080.53	60.12	19.63	1304	>sp|P02817|AMELX_BOVIN Amelogenin, X isoform OS=Bos taurus OX=9913 GN=AMELX PE=1 SV=2	1	hf1_10472_ebo_24_1_261219.ScanId;v=1;d1=25197.25197.4	controllerType=0 controllerNumber=1 scan=25197	52.6021
32286:4	1	S.M[+15.995]PLPPHPGHPGYINFS[+79.966]YEVLTPLKWYQSM[+31.990]IR.H		M[+16][+32], S[+80]	949.958	4	3796.81	3796.81	0	0.9	17	NRagged	95.02	95.02	0	2.49	1304	>sp|P02817|AMELX_BOVIN Amelogenin, X isoform OS=Bos taurus OX=9913 GN=AMELX PE=1 SV=2	1	hf1_10472_ebo_24_1_261219.ScanId;v=1;d1=24007.24007.4	controllerType=0 controllerNumber=1 scan=24007	50.4537
33041:4	1	S.M[+15.995]PLPPHPGHPGYINFS[+79.966]YEVLTPLKWYQSM[+31.990]IR.H		M[+16][+32], S[+80]	949.962	4	3796.83	3796.81	0	5.4	17	NRagged	159.51	159.51	0	3.65	1304	>sp|P02817|AMELX_BOVIN Amelogenin, X isoform OS=Bos taurus OX=9913 GN=AMELX PE=1 SV=2	1	hf1_10472_ebo_24_1_261219.ScanId;v=1;d1=24519.24519.4	controllerType=0 controllerNumber=1 scan=24519	51.3645
32730:4	1	S.MPLPPHPGHPGY[+31.990]INFS[+79.966]YEVLTPLKWYQSM[+15.995]IR.H		M[+16], S[+80], Y[+32]	949.961	4	3796.82	3796.81	0	4.4	17	NRagged	211.8	211.8	6.24	5.1	1304	>sp|P02817|AMELX_BOVIN Amelogenin, X isoform OS=Bos taurus OX=9913 GN=AMELX PE=1 SV=2	1	hf1_10472_ebo_24_1_261219.ScanId;v=1;d1=24302.24302.4	controllerType=0 controllerNumber=1 scan=24302	50.9764
32576:5	1	S.MPLP[+31.990]PHPGHPGYINFS[+79.966]YEVLTPLKWYQSM[+15.995]IR.H		M[+16], P[+32], S[+80]	760.172	5	3796.83	3796.81	0	6.9	17	NRagged	220.92	220.92	7.88	4.96	1304	>sp|P02817|AMELX_BOVIN Amelogenin, X isoform OS=Bos taurus OX=9913 GN=AMELX PE=1 SV=2	1	hf1_10472_ebo_24_1_261219.ScanId;v=1;d1=24195.24195.4	controllerType=0 controllerNumber=1 scan=24195	50.7844
31481:4	1	S.M[+15.995]PLPPHPGHPGYINFS[+79.966]YEVLTPLKWYQSM[+15.995]IR.H		M[+16]*2, S[+80]	945.962	4	3780.83	3780.81	0	4.5	17	NRagged	225.66	225.66	0	4.84	1304	>sp|P02817|AMELX_BOVIN Amelogenin, X isoform OS=Bos taurus OX=9913 GN=AMELX PE=1 SV=2	1	hf1_10472_ebo_24_1_261219.ScanId;v=1;d1=23470.23470.4	controllerType=0 controllerNumber=1 scan=23470	49.4903
35202:4	1	S.M[+15.995]PLPPHPGHPGYINFS[+79.966]YEVLTPLKWYQSM[+15.995]IR.H		M[+16]*2, S[+80]	945.955	4	3780.8	3780.81	0	-3.4	17	NRagged	237.05	237.05	13.52	4.07	1304	>sp|P02817|AMELX_BOVIN Amelogenin, X isoform OS=Bos taurus OX=9913 GN=AMELX PE=1 SV=2	1	hf1_10472_ebo_24_1_261219.ScanId;v=1;d1=25979.25979.4	controllerType=0 controllerNumber=1 scan=25979	54.0269
31130:5	1	S.MP[+15.995]LPPHPGHPGYINFS[+79.966]YEVLTPLKWYQSM[+31.990]IR.H		M[+32], P[+16], S[+80]	760.17	5	3796.82	3796.81	0	4.4	17	NRagged	284.35	284.35	4	6.32	1304	>sp|P02817|AMELX_BOVIN Amelogenin, X isoform OS=Bos taurus OX=9913 GN=AMELX PE=1 SV=2	1	hf1_10472_ebo_24_1_261219.ScanId;v=1;d1=23243.23243.5	controllerType=0 controllerNumber=1 scan=23243	49.093
33312:4	1	S.M[+31.990]PLPPHPGHPGYINFS[+79.966]YEVLTPLKWYQSM[+15.995]IR.H		M[+16][+32], S[+80]	949.965	4	3796.84	3796.81	0	8.1	17	NRagged	301.91	301.91	0	6.83	1304	>sp|P02817|AMELX_BOVIN Amelogenin, X isoform OS=Bos taurus OX=9913 GN=AMELX PE=1 SV=2	1	hf1_10472_ebo_24_1_261219.ScanId;v=1;d1=24711.24711.4	controllerType=0 controllerNumber=1 scan=24711	51.714
33582:4	1	S.M[+31.990]PLPPHPGHPGYINFS[+79.966]YEVLTPLKWYQSM[+15.995]IR.H		M[+16][+32], S[+80]	949.958	4	3796.81	3796.81	0	1.1	17	NRagged	346.61	346.61	0	5.98	1304	>sp|P02817|AMELX_BOVIN Amelogenin, X isoform OS=Bos taurus OX=9913 GN=AMELX PE=1 SV=2	1	hf1_10472_ebo_24_1_261219.ScanId;v=1;d1=24901.24901.4	controllerType=0 controllerNumber=1 scan=24901	52.0674
30248:5	1	S.MP[+15.995]LPPHPGHPGYINFS[+79.966]YEVLTPLKWY[+31.990]QSMIR.H		P[+16], S[+80], Y[+32]	760.17	5	3796.82	3796.81	0	4.1	17	NRagged	348.81	348.81	0	6.2	1304	>sp|P02817|AMELX_BOVIN Amelogenin, X isoform OS=Bos taurus OX=9913 GN=AMELX PE=1 SV=2	1	hf1_10472_ebo_24_1_261219.ScanId;v=1;d1=22667.22667.5	controllerType=0 controllerNumber=1 scan=22667	48.0716
28797:4	1	S.M[+15.995]PLPPHPGHPGYINFS[+79.966]YEVLTPLKWYQSM[+31.990]IR.H		M[+16][+32], S[+80]	949.963	4	3796.83	3796.81	0	6.9	17	NRagged	360.91	360.91	0	7.72	1304	>sp|P02817|AMELX_BOVIN Amelogenin, X isoform OS=Bos taurus OX=9913 GN=AMELX PE=1 SV=2	1	hf1_10472_ebo_24_1_261219.ScanId;v=1;d1=21730.21730.4	controllerType=0 controllerNumber=1 scan=21730	46.4198
47239:5	1	S.M[+15.995]PLPPHPGHPGYINFS[+79.966]YEVLTPLKWYQSM[+15.995]IR.H		M[+16]*2, S[+80]	756.975	5	3780.84	3780.81	0	8.9	17	NRagged	383.25	383.25	0	7.45	1304	>sp|P02817|AMELX_BOVIN Amelogenin, X isoform OS=Bos taurus OX=9913 GN=AMELX PE=1 SV=2	1	hf1_10472_ebo_24_1_261219.ScanId;v=1;d1=34801.34801.5	controllerType=0 controllerNumber=1 scan=34801	73.6371
33882:4	1	S.M[+15.995]PLPPHPGHPGYINFS[+79.966]YEVLTPLKWY[+31.990]QSMIR.H		M[+16], S[+80], Y[+32]	949.959	4	3796.82	3796.81	0	2.6	17	NRagged	405.21	405.21	0	7.3	1304	>sp|P02817|AMELX_BOVIN Amelogenin, X isoform OS=Bos taurus OX=9913 GN=AMELX PE=1 SV=2	1	hf1_10472_ebo_24_1_261219.ScanId;v=1;d1=25093.25093.4	controllerType=0 controllerNumber=1 scan=25093	52.4091
29922:5	1	S.MP[+15.995]LPPHPGHPGYINFS[+79.966]YEVLTPLKWYQSM[+31.990]IR.H		M[+32], P[+16], S[+80]	760.172	5	3796.83	3796.81	0	6.3	17	NRagged	419.14	419.14	0	7.72	1304	>sp|P02817|AMELX_BOVIN Amelogenin, X isoform OS=Bos taurus OX=9913 GN=AMELX PE=1 SV=2	1	hf1_10472_ebo_24_1_261219.ScanId;v=1;d1=22459.22459.5	controllerType=0 controllerNumber=1 scan=22459	47.7057
35082:4	1	S.MPLPPHPGHPGYIN[+0.984]FS[+79.966]YEVLTPLKWYQSM[+15.995]IR.H		M[+16], N[+1], S[+80]	942.21	4	3765.82	3765.8	0	4.8	17	NRagged	433.28	433.28	43.49	7.4	1304	>sp|P02817|AMELX_BOVIN Amelogenin, X isoform OS=Bos taurus OX=9913 GN=AMELX PE=1 SV=2	1	hf1_10472_ebo_24_1_261219.ScanId;v=1;d1=25899.25899.4	controllerType=0 controllerNumber=1 scan=25899	53.8778
29831:4	1	S.M[+15.995]PLPPHPGHPGYINFS[+79.966]YEVLTPLKW[+31.990]YQSMIR.H		M[+16], S[+80], W[+32]	949.963	4	3796.83	3796.81	0	6.9	17	NRagged	459.43	459.43	0	7.83	1304	>sp|P02817|AMELX_BOVIN Amelogenin, X isoform OS=Bos taurus OX=9913 GN=AMELX PE=1 SV=2	1	hf1_10472_ebo_24_1_261219.ScanId;v=1;d1=22401.22401.4	controllerType=0 controllerNumber=1 scan=22401	47.6035
29524:4	1	S.M[+15.995]PLPPHPGHPGYINFS[+79.966]YEVLTPLKWYQSM[+31.990]IR.H		M[+16][+32], S[+80]	949.962	4	3796.82	3796.81	0	5	17	NRagged	468.55	468.55	0	8.01	1304	>sp|P02817|AMELX_BOVIN Amelogenin, X isoform OS=Bos taurus OX=9913 GN=AMELX PE=1 SV=2	1	hf1_10472_ebo_24_1_261219.ScanId;v=1;d1=22201.22201.4	controllerType=0 controllerNumber=1 scan=22201	47.2473
31558:4	1	S.M[+15.995]PLPPHPGHPGYINFS[+79.966]YEVLTPLKW[+31.990]YQSMIR.H		M[+16], S[+80], W[+32]	949.957	4	3796.81	3796.81	0	0.3	17	NRagged	517.93	517.93	0	7.98	1304	>sp|P02817|AMELX_BOVIN Amelogenin, X isoform OS=Bos taurus OX=9913 GN=AMELX PE=1 SV=2	1	hf1_10472_ebo_24_1_261219.ScanId;v=1;d1=23522.23522.4	controllerType=0 controllerNumber=1 scan=23522	49.5818
32446:4	1	S.M[+31.990]PLPPHPGHPGYINFS[+79.966]YEVLTPLKWYQSM[+15.995]IR.H		M[+16][+32], S[+80]	949.962	4	3796.83	3796.81	0	6	17	NRagged	521.16	521.16	0	7.91	1304	>sp|P02817|AMELX_BOVIN Amelogenin, X isoform OS=Bos taurus OX=9913 GN=AMELX PE=1 SV=2	1	hf1_10472_ebo_24_1_261219.ScanId;v=1;d1=24110.24110.4	controllerType=0 controllerNumber=1 scan=24110	50.6338
31251:4	1	S.M[+15.995]PLPPHPGHPGYINFS[+79.966]YEVLTPLKWYQSM[+31.990]IR.H		M[+16][+32], S[+80]	949.958	4	3796.81	3796.81	0	1.2	17	NRagged	599.26	599.26	0	8.81	1304	>sp|P02817|AMELX_BOVIN Amelogenin, X isoform OS=Bos taurus OX=9913 GN=AMELX PE=1 SV=2	1	hf1_10472_ebo_24_1_261219.ScanId;v=1;d1=23323.23323.4	controllerType=0 controllerNumber=1 scan=23323	49.2338
32718:5	1	S.M[+15.995]PLPPHPGHPGYINFS[+79.966]YEVLTPLKWYQSM[+15.995]IR.H		M[+16]*2, S[+80]	756.972	5	3780.83	3780.81	0	5	17	NRagged	688.76	688.76	0	11.28	1304	>sp|P02817|AMELX_BOVIN Amelogenin, X isoform OS=Bos taurus OX=9913 GN=AMELX PE=1 SV=2	1	hf1_10472_ebo_24_1_261219.ScanId;v=1;d1=24293.24293.5	controllerType=0 controllerNumber=1 scan=24293	50.96
32996:5	1	S.M[+15.995]PLPPHPGHPGYINFS[+79.966]YEVLTPLKWYQSM[+15.995]IR.H		M[+16]*2, S[+80]	756.972	5	3780.83	3780.81	0	5.5	17	NRagged	730.6	730.6	0	12.28	1304	>sp|P02817|AMELX_BOVIN Amelogenin, X isoform OS=Bos taurus OX=9913 GN=AMELX PE=1 SV=2	1	hf1_10472_ebo_24_1_261219.ScanId;v=1;d1=24491.24491.5	controllerType=0 controllerNumber=1 scan=24491	51.3141
32708:3	1	S.M[+15.995]PLPPHPGHPGYINFS[+79.966]YEVLTPLKWYQSM[+15.995]IR.H		M[+16]*2, S[+80]	1260.95	3	3780.83	3780.81	0	4.5	17	NRagged	912.65	912.65	0	15.95	1304	>sp|P02817|AMELX_BOVIN Amelogenin, X isoform OS=Bos taurus OX=9913 GN=AMELX PE=1 SV=2	1	hf1_10472_ebo_24_1_261219.ScanId;v=1;d1=24284.24284.3	controllerType=0 controllerNumber=1 scan=24284	50.9416
33779:4	1	S.M[+15.995]PLPPHPGHPGYINFS[+79.966]YEVLTPLKWYQSM[+15.995]IR.H		M[+16]*2, S[+80]	945.961	4	3780.82	3780.81	0	2.9	17	NRagged	962.89	962.89	0	17.14	1304	>sp|P02817|AMELX_BOVIN Amelogenin, X isoform OS=Bos taurus OX=9913 GN=AMELX PE=1 SV=2	1	hf1_10472_ebo_24_1_261219.ScanId;v=1;d1=25028.25028.4	controllerType=0 controllerNumber=1 scan=25028	52.2928
47234:4	1	S.M[+15.995]PLPPHPGHPGYINFS[+79.966]YEVLTPLKWYQSM[+15.995]IR.H		M[+16]*2, S[+80]	945.966	4	3780.84	3780.81	0	8.5	17	NRagged	998.52	998.52	0	17.05	1304	>sp|P02817|AMELX_BOVIN Amelogenin, X isoform OS=Bos taurus OX=9913 GN=AMELX PE=1 SV=2	1	hf1_10472_ebo_24_1_261219.ScanId;v=1;d1=34797.34797.4	controllerType=0 controllerNumber=1 scan=34797	73.631
32664:4	1	S.M[+15.995]PLPPHPGHPGYINFS[+79.966]YEVLTPLKWYQSM[+15.995]IR.H		M[+16]*2, S[+80]	945.964	4	3780.84	3780.81	0	6.6	17	NRagged	1007.01	1007.01	8.42	18.63	1304	>sp|P02817|AMELX_BOVIN Amelogenin, X isoform OS=Bos taurus OX=9913 GN=AMELX PE=1 SV=2	1	hf1_10472_ebo_24_1_261219.ScanId;v=1;d1=24255.24255.4	controllerType=0 controllerNumber=1 scan=24255	50.8902
30141:4	1	S.M[+15.995]PLPPHPGHPGYINFS[+79.966]YEVLTPLKWYQSM[+31.990]IR.H		M[+16][+32], S[+80]	949.962	4	3796.82	3796.81	0	4.9	17	NRagged	1020.59	1020.59	0	18.4	1304	>sp|P02817|AMELX_BOVIN Amelogenin, X isoform OS=Bos taurus OX=9913 GN=AMELX PE=1 SV=2	1	hf1_10472_ebo_24_1_261219.ScanId;v=1;d1=22599.22599.4	controllerType=0 controllerNumber=1 scan=22599	47.9538
32983:3	1	S.M[+15.995]PLPPHPGHPGYINFS[+79.966]YEVLTPLKWYQSM[+15.995]IR.H		M[+16]*2, S[+80]	1260.95	3	3780.83	3780.81	0	6	17	NRagged	1115.21	1115.21	0	19.95	1304	>sp|P02817|AMELX_BOVIN Amelogenin, X isoform OS=Bos taurus OX=9913 GN=AMELX PE=1 SV=2	1	hf1_10472_ebo_24_1_261219.ScanId;v=1;d1=24481.24481.3	controllerType=0 controllerNumber=1 scan=24481	51.2962
33224:4	1	S.M[+15.995]PLPPHPGHPGYINFS[+79.966]YEVLTPLKWYQSM[+15.995]IR.H		M[+16]*2, S[+80]	945.963	4	3780.83	3780.81	0	5.6	17	NRagged	1145.33	1145.33	7.11	20.4	1304	>sp|P02817|AMELX_BOVIN Amelogenin, X isoform OS=Bos taurus OX=9913 GN=AMELX PE=1 SV=2	1	hf1_10472_ebo_24_1_261219.ScanId;v=1;d1=24644.24644.4	controllerType=0 controllerNumber=1 scan=24644	51.5902
30956:4	1	S.M[+15.995]PLPPHPGHPGYINFS[+79.966]YEVLTPLKW[+31.990]YQSMIR.H		M[+16], S[+80], W[+32]	949.961	4	3796.82	3796.81	0	4.7	17	NRagged	1153.53	1153.53	0	21.4	1304	>sp|P02817|AMELX_BOVIN Amelogenin, X isoform OS=Bos taurus OX=9913 GN=AMELX PE=1 SV=2	1	hf1_10472_ebo_24_1_261219.ScanId;v=1;d1=23129.23129.4	controllerType=0 controllerNumber=1 scan=23129	48.8923
32944:4	1	S.M[+15.995]PLPPHPGHPGYINFS[+79.966]YEVLTPLKWYQSM[+15.995]IR.H		M[+16]*2, S[+80]	945.963	4	3780.83	3780.81	0	5.4	17	NRagged	1188.97	1188.97	20.55	21.4	1304	>sp|P02817|AMELX_BOVIN Amelogenin, X isoform OS=Bos taurus OX=9913 GN=AMELX PE=1 SV=2	1	hf1_10472_ebo_24_1_261219.ScanId;v=1;d1=24453.24453.4	controllerType=0 controllerNumber=1 scan=24453	51.2446
31748:4	1	S.M[+15.995]PLPPHPGHPGYINFS[+79.966]YEVLTPLKW[+31.990]YQSM[+15.995]IR.H		M[+16]*2, S[+80], W[+32]	953.965	4	3812.84	3812.8	0	10	17	NRagged	53.9	53.9	0	2.23	1304	>sp|P02817|AMELX_BOVIN Amelogenin, X isoform OS=Bos taurus OX=9913 GN=AMELX PE=1 SV=2	1	hf1_10472_ebo_24_1_261219.ScanId;v=1;d1=23647.23647.4	controllerType=0 controllerNumber=1 scan=23647	49.8051
34175:4	1	S.M[+15.995]PLPPHPGHPGYIN[+0.984]FS[+79.966]YEVLTPLKWYQSM[+31.990]IR.H		M[+16][+32], N[+1], S[+80]	950.21	4	3797.82	3797.79	0	7.6	17	NRagged	190.26	190.26	16.55	4.87	1304	>sp|P02817|AMELX_BOVIN Amelogenin, X isoform OS=Bos taurus OX=9913 GN=AMELX PE=1 SV=2	1	hf1_10472_ebo_24_1_261219.ScanId;v=1;d1=25287.25287.4	controllerType=0 controllerNumber=1 scan=25287	52.7617
31930:4	1	S.M[+15.995]PLPPHPGHPGYINFS[+79.966]YEVLTP[+15.995]LKW[+31.990]YQSMIR.H		M[+16], P[+16], S[+80], W[+32]	953.961	4	3812.82	3812.8	0	5.7	17	NRagged	206.36	206.36	0	5.1	1304	>sp|P02817|AMELX_BOVIN Amelogenin, X isoform OS=Bos taurus OX=9913 GN=AMELX PE=1 SV=2	1	hf1_10472_ebo_24_1_261219.ScanId;v=1;d1=23771.23771.4	controllerType=0 controllerNumber=1 scan=23771	50.0295
30567:4	1	S.M[+15.995]PLPPHPGHPGYINFS[+79.966]YEVLTP[+15.995]LKW[+31.990]YQSMIR.H		M[+16], P[+16], S[+80], W[+32]	953.958	4	3812.81	3812.8	0	2.9	17	NRagged	258.64	258.64	5.86	6	1304	>sp|P02817|AMELX_BOVIN Amelogenin, X isoform OS=Bos taurus OX=9913 GN=AMELX PE=1 SV=2	1	hf1_10472_ebo_24_1_261219.ScanId;v=1;d1=22877.22877.4	controllerType=0 controllerNumber=1 scan=22877	48.4418
33883:4	1	S.M[+15.995]PLPPHPGHPGYIN[+0.984]FS[+79.966]YEVLTPLKWYQSM[+31.990]IR.H		M[+16][+32], N[+1], S[+80]	950.208	4	3797.81	3797.79	0	5.4	17	NRagged	350.44	350.44	0	6.72	1304	>sp|P02817|AMELX_BOVIN Amelogenin, X isoform OS=Bos taurus OX=9913 GN=AMELX PE=1 SV=2	1	hf1_10472_ebo_24_1_261219.ScanId;v=1;d1=25093.25093.4	controllerType=0 controllerNumber=1 scan=25093	52.4091
33583:4	1	S.M[+31.990]PLPPHPGHPGYIN[+0.984]FS[+79.966]YEVLTPLKWYQSM[+15.995]IR.H		M[+16][+32], N[+1], S[+80]	950.209	4	3797.81	3797.79	0	6.4	17	NRagged	357.99	357.99	0	6.8	1304	>sp|P02817|AMELX_BOVIN Amelogenin, X isoform OS=Bos taurus OX=9913 GN=AMELX PE=1 SV=2	1	hf1_10472_ebo_24_1_261219.ScanId;v=1;d1=24901.24901.4	controllerType=0 controllerNumber=1 scan=24901	52.0674
31038:5	1	S.M[+15.995]PLPPHPGHPGYINFS[+79.966]YEVLTPLKW[+31.990]YQSM[+15.995]IR.H		M[+16]*2, S[+80], W[+32]	763.37	5	3812.82	3812.8	0	4.9	17	NRagged	390.34	390.34	0	7.37	1304	>sp|P02817|AMELX_BOVIN Amelogenin, X isoform OS=Bos taurus OX=9913 GN=AMELX PE=1 SV=2	1	hf1_10472_ebo_24_1_261219.ScanId;v=1;d1=23183.23183.5	controllerType=0 controllerNumber=1 scan=23183	48.9902
31849:4	1	S.M[+15.995]PLPPHPGHPGYINFS[+79.966]YEVLTPLKWY[+31.990]Q[+0.984]SMIR.H		M[+16], Q[+1], S[+80], Y[+32]	950.206	4	3797.8	3797.79	0	3.1	17	NRagged	408.98	408.98	0	7.34	1304	>sp|P02817|AMELX_BOVIN Amelogenin, X isoform OS=Bos taurus OX=9913 GN=AMELX PE=1 SV=2	1	hf1_10472_ebo_24_1_261219.ScanId;v=1;d1=23720.23720.4	controllerType=0 controllerNumber=1 scan=23720	49.9364
29777:4	1	S.M[+15.995]PLPPHPGHPGYINFS[+79.966]YEVLTPLKW[+31.990]YQSM[+15.995]IR.H		M[+16]*2, S[+80], W[+32]	953.962	4	3812.83	3812.8	0	7.3	17	NRagged	494.3	494.3	0	8.13	1304	>sp|P02817|AMELX_BOVIN Amelogenin, X isoform OS=Bos taurus OX=9913 GN=AMELX PE=1 SV=2	1	hf1_10472_ebo_24_1_261219.ScanId;v=1;d1=22365.22365.4	controllerType=0 controllerNumber=1 scan=22365	47.5374
32135:4	1	S.M[+15.995]PLPPHPGHPGYINFS[+79.966]YEVLTPLKWY[+31.990]Q[+0.984]SMIR.H		M[+16], Q[+1], S[+80], Y[+32]	950.211	4	3797.82	3797.79	0	8.6	17	NRagged	550.67	550.67	0	7.57	1304	>sp|P02817|AMELX_BOVIN Amelogenin, X isoform OS=Bos taurus OX=9913 GN=AMELX PE=1 SV=2	1	hf1_10472_ebo_24_1_261219.ScanId;v=1;d1=23911.23911.4	controllerType=0 controllerNumber=1 scan=23911	50.2783
31165:4	1	S.M[+15.995]PLPPHPGHPGYINFS[+79.966]YEVLTPLKW[+31.990]Y[+15.995]QSMIR.H		M[+16], S[+80], W[+32], Y[+16]	953.961	4	3812.82	3812.8	0	5.9	17	NRagged	831.35	831.35	0.43	14.4	1304	>sp|P02817|AMELX_BOVIN Amelogenin, X isoform OS=Bos taurus OX=9913 GN=AMELX PE=1 SV=2	1	hf1_10472_ebo_24_1_261219.ScanId;v=1;d1=23268.23268.4	controllerType=0 controllerNumber=1 scan=23268	49.1382
32489:5	1	S.M[+15.995]PLPPHPGHPGYINFS[+79.966]YEVLTPLKWYQSM[+15.995]IRH.P		M[+16]*2, S[+80]	784.38	5	3917.87	3917.87	0	0.7	17	Non	53.19	53.19	0	2.18	1304	>sp|P02817|AMELX_BOVIN Amelogenin, X isoform OS=Bos taurus OX=9913 GN=AMELX PE=1 SV=2	1	hf1_10472_ebo_24_1_261219.ScanId;v=1;d1=24140.24140.4	controllerType=0 controllerNumber=1 scan=24140	50.686
31230:6	1	S.M[+15.995]PLPPHPGHPGYINFS[+79.966]YEVLTPLKWYQSM[+15.995]IRH.P		M[+16]*2, S[+80]	653.821	6	3917.89	3917.87	0	5.8	17	Non	72.25	72.25	0	3.34	1304	>sp|P02817|AMELX_BOVIN Amelogenin, X isoform OS=Bos taurus OX=9913 GN=AMELX PE=1 SV=2	1	hf1_10472_ebo_24_1_261219.ScanId;v=1;d1=23309.23309.6	controllerType=0 controllerNumber=1 scan=23309	49.2071
31116:5	1	S.M[+15.995]PLPPHPGHPGYINFS[+79.966]YEVLTPLKWYQSM[+15.995]IRH.P		M[+16]*2, S[+80]	784.385	5	3917.89	3917.87	0	6.2	17	Non	636.05	636.05	0	10.2	1304	>sp|P02817|AMELX_BOVIN Amelogenin, X isoform OS=Bos taurus OX=9913 GN=AMELX PE=1 SV=2	1	hf1_10472_ebo_24_1_261219.ScanId;v=1;d1=23235.23235.5	controllerType=0 controllerNumber=1 scan=23235	49.0812
30639:5	1	S.MP[+15.995]LPPHPGHPGYINFS[+79.966]YEVLTPLKWYQSMIRH[+15.995]P.Y		H[+16], P[+16], S[+80]	803.598	5	4013.96	4014.92	-1	10	17	Non	53.34	53.34	0.4	2.42	1304	>sp|P02817|AMELX_BOVIN Amelogenin, X isoform OS=Bos taurus OX=9913 GN=AMELX PE=1 SV=2	1	hf1_10472_ebo_24_1_261219.ScanId;v=1;d1=22922.22922.5	controllerType=0 controllerNumber=1 scan=22922	48.5201
31243:5	1	S.M[+15.995]PLPPHPGHPGYINFS[+79.966]YEVLTPLKWYQSM[+15.995]IRHP.Y		M[+16]*2, S[+80]	803.595	5	4013.94	4014.92	-1	6.5	17	Non	463.97	463.97	0	8.5	1304	>sp|P02817|AMELX_BOVIN Amelogenin, X isoform OS=Bos taurus OX=9913 GN=AMELX PE=1 SV=2	1	hf1_10472_ebo_24_1_261219.ScanId;v=1;d1=23317.23317.5	controllerType=0 controllerNumber=1 scan=23317	49.222
29021:5	1	S.M[+15.995]PLPPHPGHPGYINFSYEVLTPLKWYQSMIRHPYP.S		M[+16]	836.425	5	4178.1	4179.08	-1	5.5	17	Non	34.95	34.95	8.52	2.25	1304	>sp|P02817|AMELX_BOVIN Amelogenin, X isoform OS=Bos taurus OX=9913 GN=AMELX PE=1 SV=2	1	hf1_10472_ebo_24_1_261219.ScanId;v=1;d1=21874.21874.5	controllerType=0 controllerNumber=1 scan=21874	46.6738
29940:5	1	S.M[+15.995]PLPPHPGHPGYINFSYEVLTPLKWYQSMIRHPYP.S		M[+16]	836.424	5	4178.09	4179.08	-1	3.6	17	Non	99.94	96.74	18.47	2.31	1304	>sp|P02817|AMELX_BOVIN Amelogenin, X isoform OS=Bos taurus OX=9913 GN=AMELX PE=1 SV=2	1	hf1_10472_ebo_24_1_261219.ScanId;v=1;d1=22470.22470.5	controllerType=0 controllerNumber=1 scan=22470	47.7253
30513:6	1	S.MPLPPHPGHPGYINFSYEVLTPLKWY[+15.995]QSMIRHPYP.S		Y[+16]	697.518	6	4180.07	4179.08	1	-2.6	17	Non	109.39	109.39	4	1.65	1304	>sp|P02817|AMELX_BOVIN Amelogenin, X isoform OS=Bos taurus OX=9913 GN=AMELX PE=1 SV=2	1	hf1_10472_ebo_24_1_261219.ScanId;v=1;d1=22841.22841.6	controllerType=0 controllerNumber=1 scan=22841	48.3791
28698:6	1	S.MP[+15.995]LPPHPGHPGYINFSYEVLTPLKWYQSMIRHPYP.S		P[+16]	697.354	6	4179.09	4179.08	0	2.3	17	Non	127.61	120.29	4	2.51	1304	>sp|P02817|AMELX_BOVIN Amelogenin, X isoform OS=Bos taurus OX=9913 GN=AMELX PE=1 SV=2	1	hf1_10472_ebo_24_1_261219.ScanId;v=1;d1=21662.21662.4	controllerType=0 controllerNumber=1 scan=21662	46.3003
32542:6	1	S.MPLPPHPGHPGYINFSYEVLTPLKWYQSMIRH[+15.995]PYP.S		H[+16]	697.185	6	4178.07	4179.08	-1	0	17	Non	154.45	154.45	2.56	2.23	1304	>sp|P02817|AMELX_BOVIN Amelogenin, X isoform OS=Bos taurus OX=9913 GN=AMELX PE=1 SV=2	1	hf1_10472_ebo_24_1_261219.ScanId;v=1;d1=24173.24173.6	controllerType=0 controllerNumber=1 scan=24173	50.7467
33109:6	1	S.MP[+15.995]LPPHPGHPGYINFSYEVLTPLKWYQSMIRHPYP.S		P[+16]	697.184	6	4178.07	4179.08	-1	-1.1	17	Non	247.83	247.83	5.8	4.65	1304	>sp|P02817|AMELX_BOVIN Amelogenin, X isoform OS=Bos taurus OX=9913 GN=AMELX PE=1 SV=2	1	hf1_10472_ebo_24_1_261219.ScanId;v=1;d1=24567.24567.6	controllerType=0 controllerNumber=1 scan=24567	51.4532
32835:6	1	S.MP[+15.995]LPPHPGHPGYINFSYEVLTPLKWYQSMIRHPYP.S		P[+16]	697.184	6	4178.07	4179.08	-1	-1.2	17	Non	260.23	252.04	4	4.65	1304	>sp|P02817|AMELX_BOVIN Amelogenin, X isoform OS=Bos taurus OX=9913 GN=AMELX PE=1 SV=2	1	hf1_10472_ebo_24_1_261219.ScanId;v=1;d1=24378.24378.6	controllerType=0 controllerNumber=1 scan=24378	51.109
33081:5	1	S.M[+15.995]PLPPHPGHPGYINFSYEVLTPLKWYQSMIRHPYP.S		M[+16]	836.42	5	4178.07	4179.08	-1	-0.5	17	Non	273.7	228.99	14.94	4.46	1304	>sp|P02817|AMELX_BOVIN Amelogenin, X isoform OS=Bos taurus OX=9913 GN=AMELX PE=1 SV=2	1	hf1_10472_ebo_24_1_261219.ScanId;v=1;d1=24544.24544.5	controllerType=0 controllerNumber=1 scan=24544	51.4099
32875:4	1	S.M[+15.995]PLPPHPGHPGYINFSYEVLTPLKWYQSMIRHPYP.S		M[+16]	1045.27	4	4178.07	4179.08	-1	-1.6	17	Non	310.82	227.31	30.07	4.36	1304	>sp|P02817|AMELX_BOVIN Amelogenin, X isoform OS=Bos taurus OX=9913 GN=AMELX PE=1 SV=2	1	hf1_10472_ebo_24_1_261219.ScanId;v=1;d1=24407.24407.4	controllerType=0 controllerNumber=1 scan=24407	51.1632
30456:5	1	S.MP[+15.995]LPPHPGHPGYINFSYEVLTPLKWY[+15.995]QSMIRHPYP.S		P[+16], Y[+16]	839.624	5	4194.09	4195.07	-1	5.6	17	Non	13.93	13.93	0	1.38	1304	>sp|P02817|AMELX_BOVIN Amelogenin, X isoform OS=Bos taurus OX=9913 GN=AMELX PE=1 SV=2	1	hf1_10472_ebo_24_1_261219.ScanId;v=1;d1=22803.22803.4	controllerType=0 controllerNumber=1 scan=22803	48.3119
30323:6	1	S.M[+15.995]PLPPHPGHPGYINFSYEVLTP[+31.990]LKWYQSMIRHPYP.S		M[+16], P[+32]	702.518	6	4210.07	4211.07	-1	2.3	17	Non	56.66	56.66	0	1.33	1304	>sp|P02817|AMELX_BOVIN Amelogenin, X isoform OS=Bos taurus OX=9913 GN=AMELX PE=1 SV=2	1	hf1_10472_ebo_24_1_261219.ScanId;v=1;d1=22716.22716.6	controllerType=0 controllerNumber=1 scan=22716	48.1593
31044:6	1	S.M[+15.995]PLPPHPGHPGYINFSYEVLTPLKWYQSM[+31.990]IRHPYP.S		M[+16][+32]	702.683	6	4211.06	4211.07	0	-1.5	17	Non	102.34	102.34	8.87	2.2	1304	>sp|P02817|AMELX_BOVIN Amelogenin, X isoform OS=Bos taurus OX=9913 GN=AMELX PE=1 SV=2	1	hf1_10472_ebo_24_1_261219.ScanId;v=1;d1=23186.23186.6	controllerType=0 controllerNumber=1 scan=23186	48.9947
30852:5	1	S.MP[+15.995]LPPHPGHPGYINFS[+79.966]YEVLTPLKWYQSMIRHPYP.S		P[+16], S[+80]	852.417	5	4258.05	4259.04	-1	3.2	17	Non	108.04	108.04	4	2.31	1304	>sp|P02817|AMELX_BOVIN Amelogenin, X isoform OS=Bos taurus OX=9913 GN=AMELX PE=1 SV=2	1	hf1_10472_ebo_24_1_261219.ScanId;v=1;d1=23062.23062.5	controllerType=0 controllerNumber=1 scan=23062	48.7722
29356:5	1	S.M[+15.995]PLPPHPGHPGYINFSYEVLTPLKWYQSM[+15.995]IRHPYP.S		M[+16]*2	839.621	5	4194.07	4195.07	-1	1.5	17	Non	118.48	118.48	0	2.4	1304	>sp|P02817|AMELX_BOVIN Amelogenin, X isoform OS=Bos taurus OX=9913 GN=AMELX PE=1 SV=2	1	hf1_10472_ebo_24_1_261219.ScanId;v=1;d1=22094.22094.5	controllerType=0 controllerNumber=1 scan=22094	47.0595
32327:6	1	S.MP[+15.995]LPPHPGHPGYINFSYEVLTPLKWY[+15.995]QSMIRHPYP.S		P[+16], Y[+16]	699.852	6	4194.07	4195.07	-1	1.3	17	Non	146.96	146.96	0	2.61	1304	>sp|P02817|AMELX_BOVIN Amelogenin, X isoform OS=Bos taurus OX=9913 GN=AMELX PE=1 SV=2	1	hf1_10472_ebo_24_1_261219.ScanId;v=1;d1=24035.24035.6	controllerType=0 controllerNumber=1 scan=24035	50.5007
30229:6	1	S.M[+15.995]PLPPHPGHPGYINFSYEVLTPLKWYQSM[+15.995]IRHPYP.S		M[+16]*2	699.853	6	4194.08	4195.07	-1	2.5	17	Non	216.92	216.92	0	4.12	1304	>sp|P02817|AMELX_BOVIN Amelogenin, X isoform OS=Bos taurus OX=9913 GN=AMELX PE=1 SV=2	1	hf1_10472_ebo_24_1_261219.ScanId;v=1;d1=22656.22656.6	controllerType=0 controllerNumber=1 scan=22656	48.0522
32000:6	1	S.MP[+15.995]LPPHPGHPGYINFSYEVLTPLKWY[+15.995]QSMIRHPYP.S		P[+16], Y[+16]	700.021	6	4195.09	4195.07	0	4.3	17	Non	244.18	244.18	0	5.38	1304	>sp|P02817|AMELX_BOVIN Amelogenin, X isoform OS=Bos taurus OX=9913 GN=AMELX PE=1 SV=2	1	hf1_10472_ebo_24_1_261219.ScanId;v=1;d1=23816.23816.6	controllerType=0 controllerNumber=1 scan=23816	50.1085
37291:5	1	S.MP[+15.995]LPPHPGHPGYINFS[+79.966]YEVLTPLKWYQSMIRHPYP.S		P[+16], S[+80]	852.816	5	4260.05	4259.04	1	0.8	17	Non	252.05	252.05	13.98	4.74	1304	>sp|P02817|AMELX_BOVIN Amelogenin, X isoform OS=Bos taurus OX=9913 GN=AMELX PE=1 SV=2	1	hf1_10472_ebo_24_1_261219.ScanId;v=1;d1=27341.27341.6	controllerType=0 controllerNumber=1 scan=27341	56.4847
30758:6	1	S.MP[+15.995]LPPHPGHPGYINFSYEVLTPLKWYQSMIR[+0.984]HPYP.S		P[+16], R[+1]	697.518	6	4180.07	4180.06	0	3.1	17	Non	252.45	251.86	5.8	4.96	1304	>sp|P02817|AMELX_BOVIN Amelogenin, X isoform OS=Bos taurus OX=9913 GN=AMELX PE=1 SV=2	1	hf1_10472_ebo_24_1_261219.ScanId;v=1;d1=23002.23002.6	controllerType=0 controllerNumber=1 scan=23002	48.6681
37405:4	1	S.M[+15.995]PLPPHPGHPGYINFS[+79.966]YEVLTPLKWYQSMIRHPYP.S		M[+16], S[+80]	1065.52	4	4259.05	4259.04	0	2.6	17	Non	269.82	269.82	11.22	4.63	1304	>sp|P02817|AMELX_BOVIN Amelogenin, X isoform OS=Bos taurus OX=9913 GN=AMELX PE=1 SV=2	1	hf1_10472_ebo_24_1_261219.ScanId;v=1;d1=27416.27416.4	controllerType=0 controllerNumber=1 scan=27416	56.6207
31157:5	1	S.MP[+15.995]LPPHPGHPGYINFSYEVLTPLKWYQSMIRH[+15.995]PYP.S		H[+16], P[+16]	839.621	5	4194.08	4195.07	-1	1.6	17	Non	295.27	295.27	2.49	5.23	1304	>sp|P02817|AMELX_BOVIN Amelogenin, X isoform OS=Bos taurus OX=9913 GN=AMELX PE=1 SV=2	1	hf1_10472_ebo_24_1_261219.ScanId;v=1;d1=23262.23262.7	controllerType=0 controllerNumber=1 scan=23262	49.1263
32899:6	1	S.MPLPPHPGHPGYINFS[+79.966]YEVLTPLKWYQSM[+15.995]IRHPYP.S		M[+16], S[+80]	710.684	6	4259.07	4259.04	0	5.5	17	Non	304.75	304.75	23.33	5.71	1304	>sp|P02817|AMELX_BOVIN Amelogenin, X isoform OS=Bos taurus OX=9913 GN=AMELX PE=1 SV=2	1	hf1_10472_ebo_24_1_261219.ScanId;v=1;d1=24424.24424.6	controllerType=0 controllerNumber=1 scan=24424	51.1934
31492:6	1	S.MP[+15.995]LPPHPGHPGYINFSYEVLTPLKWYQSM[+15.995]IRHPYP.S		M[+16], P[+16]	700.019	6	4195.08	4195.07	0	1.3	17	Non	347.35	347.35	3.81	5.1	1304	>sp|P02817|AMELX_BOVIN Amelogenin, X isoform OS=Bos taurus OX=9913 GN=AMELX PE=1 SV=2	1	hf1_10472_ebo_24_1_261219.ScanId;v=1;d1=23479.23479.6	controllerType=0 controllerNumber=1 scan=23479	49.5062
33377:5	1	S.MPLPPHPGHPGYINFS[+79.966]YEVLTPLKWYQSM[+15.995]IRHPYP.S		M[+16], S[+80]	852.616	5	4259.05	4259.04	0	2.3	17	Non	350.45	350.45	11.63	5.55	1304	>sp|P02817|AMELX_BOVIN Amelogenin, X isoform OS=Bos taurus OX=9913 GN=AMELX PE=1 SV=2	1	hf1_10472_ebo_24_1_261219.ScanId;v=1;d1=24755.24755.5	controllerType=0 controllerNumber=1 scan=24755	51.7926
30828:6	1	S.M[+15.995]PLPPHPGHPGYINFSYEVLTPLKWYQSMIRHP[+15.995]YP.S		M[+16], P[+16]	699.855	6	4194.09	4195.07	-1	6.2	17	Non	372.08	372.08	0.37	6.8	1304	>sp|P02817|AMELX_BOVIN Amelogenin, X isoform OS=Bos taurus OX=9913 GN=AMELX PE=1 SV=2	1	hf1_10472_ebo_24_1_261219.ScanId;v=1;d1=23047.23047.6	controllerType=0 controllerNumber=1 scan=23047	48.7468
31497:6	1	S.MP[+15.995]LPPHPGHPGYINFSYEVLTPLKWYQSM[+15.995]IRHPYP.S		M[+16], P[+16]	700.019	6	4195.08	4195.07	0	1.3	17	Non	389.06	389.06	0	6.21	1304	>sp|P02817|AMELX_BOVIN Amelogenin, X isoform OS=Bos taurus OX=9913 GN=AMELX PE=1 SV=2	1	hf1_10472_ebo_24_1_261219.ScanId;v=1;d1=23482.23482.6	controllerType=0 controllerNumber=1 scan=23482	49.5103
32622:6	1	S.MPLPPHPGHPGYINFS[+79.966]YEVLTPLKWYQSM[+15.995]IRHPYP.S		M[+16], S[+80]	710.684	6	4259.07	4259.04	0	5.1	17	Non	414.55	414.55	3.97	6.52	1304	>sp|P02817|AMELX_BOVIN Amelogenin, X isoform OS=Bos taurus OX=9913 GN=AMELX PE=1 SV=2	1	hf1_10472_ebo_24_1_261219.ScanId;v=1;d1=24224.24224.6	controllerType=0 controllerNumber=1 scan=24224	50.8337
29612:6	1	S.M[+15.995]PLPPHPGHPGYINFSYEVLTPLKWYQSM[+15.995]IRHPYP.S		M[+16]*2	699.856	6	4194.1	4195.07	-1	6.9	17	Non	418.36	418.36	0	6.95	1304	>sp|P02817|AMELX_BOVIN Amelogenin, X isoform OS=Bos taurus OX=9913 GN=AMELX PE=1 SV=2	1	hf1_10472_ebo_24_1_261219.ScanId;v=1;d1=22259.22259.6	controllerType=0 controllerNumber=1 scan=22259	47.3487
32551:5	1	S.MPLPPHPGHPGYINFS[+79.966]YEVLTPLKWYQSM[+15.995]IRHPYP.S		M[+16], S[+80]	852.618	5	4259.06	4259.04	0	4.3	17	Non	436.48	436.48	9.87	6.63	1304	>sp|P02817|AMELX_BOVIN Amelogenin, X isoform OS=Bos taurus OX=9913 GN=AMELX PE=1 SV=2	1	hf1_10472_ebo_24_1_261219.ScanId;v=1;d1=24179.24179.5	controllerType=0 controllerNumber=1 scan=24179	50.7547
33716:5	1	S.MPLPPHPGHPGYINFS[+79.966]YEVLTPLKWY[+15.995]QSMIRHPYP.S		S[+80], Y[+16]	852.816	5	4260.05	4259.04	1	1.4	17	Non	449.6	449.6	3.04	6.23	1304	>sp|P02817|AMELX_BOVIN Amelogenin, X isoform OS=Bos taurus OX=9913 GN=AMELX PE=1 SV=2	1	hf1_10472_ebo_24_1_261219.ScanId;v=1;d1=24986.24986.5	controllerType=0 controllerNumber=1 scan=24986	52.2183
33108:5	1	S.MPLPPHPGHPGYINFS[+79.966]YEVLTPLKWY[+15.995]QSMIRHPYP.S		S[+80], Y[+16]	852.415	5	4258.05	4259.04	-1	1.1	17	Non	548.37	548.37	3.08	6.78	1304	>sp|P02817|AMELX_BOVIN Amelogenin, X isoform OS=Bos taurus OX=9913 GN=AMELX PE=1 SV=2	1	hf1_10472_ebo_24_1_261219.ScanId;v=1;d1=24565.24565.5	controllerType=0 controllerNumber=1 scan=24565	51.4474
32830:5	1	S.MPLPPHPGHPGYINFS[+79.966]YEVLTPLKWYQSM[+15.995]IRHPYP.S		M[+16], S[+80]	852.618	5	4259.06	4259.04	0	4.6	17	Non	681.21	681.21	3.94	10.63	1304	>sp|P02817|AMELX_BOVIN Amelogenin, X isoform OS=Bos taurus OX=9913 GN=AMELX PE=1 SV=2	1	hf1_10472_ebo_24_1_261219.ScanId;v=1;d1=24374.24374.5	controllerType=0 controllerNumber=1 scan=24374	51.103
30526:6	1	S.M[+15.995]PLPPHPGHPGYINFSYEVLTPLKWYQSM[+15.995]IRHPYP.S		M[+16]*2	700.022	6	4195.09	4195.07	0	5.2	17	Non	712.02	712.02	0	11.51	1304	>sp|P02817|AMELX_BOVIN Amelogenin, X isoform OS=Bos taurus OX=9913 GN=AMELX PE=1 SV=2	1	hf1_10472_ebo_24_1_261219.ScanId;v=1;d1=22849.22849.6	controllerType=0 controllerNumber=1 scan=22849	48.3939
36079:5	1	S.M[+15.995]PLPPHPGHPGYINFS[+79.966]YEVLTPLKWYQSMIRHPYP.S		M[+16], S[+80]	852.62	5	4259.07	4259.04	0	5.8	17	Non	725.08	725.08	5.92	11.63	1304	>sp|P02817|AMELX_BOVIN Amelogenin, X isoform OS=Bos taurus OX=9913 GN=AMELX PE=1 SV=2	1	hf1_10472_ebo_24_1_261219.ScanId;v=1;d1=26555.26555.5	controllerType=0 controllerNumber=1 scan=26555	55.0686
32613:4	1	S.MPLPPHPGHPGYINFS[+79.966]YEVLTPLKWYQSM[+15.995]IRHPYP.S		M[+16], S[+80]	1065.52	4	4259.08	4259.04	0	7.5	17	Non	733.6	733.6	42.8	11.42	1304	>sp|P02817|AMELX_BOVIN Amelogenin, X isoform OS=Bos taurus OX=9913 GN=AMELX PE=1 SV=2	1	hf1_10472_ebo_24_1_261219.ScanId;v=1;d1=24218.24218.4	controllerType=0 controllerNumber=1 scan=24218	50.8246
30496:5	1	S.M[+15.995]PLPPHPGHPGYINFSYEVLTPLKWYQSM[+15.995]IRHPYP.S		M[+16]*2	839.824	5	4195.09	4195.07	0	4.6	17	Non	753.34	753.34	0	12.63	1304	>sp|P02817|AMELX_BOVIN Amelogenin, X isoform OS=Bos taurus OX=9913 GN=AMELX PE=1 SV=2	1	hf1_10472_ebo_24_1_261219.ScanId;v=1;d1=22830.22830.5	controllerType=0 controllerNumber=1 scan=22830	48.3597
32882:4	1	S.MPLPPHPGHPGYINFS[+79.966]YEVLTPLKWYQSM[+15.995]IRHPYP.S		M[+16], S[+80]	1065.52	4	4259.07	4259.04	0	6.4	17	Non	863.38	863.38	49.13	14.42	1304	>sp|P02817|AMELX_BOVIN Amelogenin, X isoform OS=Bos taurus OX=9913 GN=AMELX PE=1 SV=2	1	hf1_10472_ebo_24_1_261219.ScanId;v=1;d1=24412.24412.4	controllerType=0 controllerNumber=1 scan=24412	51.1734
36254:4	1	S.M[+15.995]PLPPHPGHPGYINFS[+79.966]YEVLTPLKWYQSMIRHPYP.S		M[+16], S[+80]	1065.52	4	4259.08	4259.04	0	8.1	17	Non	1066.12	1066.12	27.03	18.42	1304	>sp|P02817|AMELX_BOVIN Amelogenin, X isoform OS=Bos taurus OX=9913 GN=AMELX PE=1 SV=2	1	hf1_10472_ebo_24_1_261219.ScanId;v=1;d1=26663.26663.4	controllerType=0 controllerNumber=1 scan=26663	55.2611
44045:5	1	S.MP[+15.995]LPPHPGHPGYINFS[+79.966]YEVLTPLKWY[+15.995]QSMIRHPYP.S		P[+16], S[+80], Y[+16]	855.818	5	4275.06	4275.04	0	4.8	17	Non	4.42	4.42	0	2.44	1304	>sp|P02817|AMELX_BOVIN Amelogenin, X isoform OS=Bos taurus OX=9913 GN=AMELX PE=1 SV=2	1	hf1_10472_ebo_24_1_261219.ScanId;v=1;d1=31726.31726.5	controllerType=0 controllerNumber=1 scan=31726	64.4617
39174:5	1	S.MP[+15.995]LPPHPGHPGYINFS[+79.966]YEVLTPLK[+15.995]WYQSMIRHPYP.S		K[+16], P[+16], S[+80]	855.818	5	4275.06	4275.04	0	4.9	17	Non	6.44	6.44	0	1.38	1304	>sp|P02817|AMELX_BOVIN Amelogenin, X isoform OS=Bos taurus OX=9913 GN=AMELX PE=1 SV=2	1	hf1_10472_ebo_24_1_261219.ScanId;v=1;d1=28550.28550.5	controllerType=0 controllerNumber=1 scan=28550	58.6674
45291:5	1	S.MP[+15.995]LPPHPGHPGYINFS[+79.966]YEVLTPLK[+15.995]WYQSMIRHPYP.S		K[+16], P[+16], S[+80]	855.817	5	4275.06	4275.04	0	4.5	17	Non	6.84	6.84	0	2.25	1304	>sp|P02817|AMELX_BOVIN Amelogenin, X isoform OS=Bos taurus OX=9913 GN=AMELX PE=1 SV=2	1	hf1_10472_ebo_24_1_261219.ScanId;v=1;d1=32784.32784.5	controllerType=0 controllerNumber=1 scan=32784	67.1922
44268:5	1	S.MP[+15.995]LPPHPGHPGYINFS[+79.966]YEVLTPLKWYQSMIRH[+15.995]PYP.S		H[+16], P[+16], S[+80]	855.818	5	4275.06	4275.04	0	5.2	17	Non	17.17	17.17	0.4	2.69	1304	>sp|P02817|AMELX_BOVIN Amelogenin, X isoform OS=Bos taurus OX=9913 GN=AMELX PE=1 SV=2	1	hf1_10472_ebo_24_1_261219.ScanId;v=1;d1=31895.31895.5	controllerType=0 controllerNumber=1 scan=31895	64.8018
43745:5	1	S.MP[+15.995]LPPHPGHPGYINFS[+79.966]YEVLTPLKWY[+15.995]QSMIRHPYP.S		P[+16], S[+80], Y[+16]	856.019	5	4276.07	4275.04	1	6.2	17	Non	18.08	18.08	0	2.25	1304	>sp|P02817|AMELX_BOVIN Amelogenin, X isoform OS=Bos taurus OX=9913 GN=AMELX PE=1 SV=2	1	hf1_10472_ebo_24_1_261219.ScanId;v=1;d1=31527.31527.5	controllerType=0 controllerNumber=1 scan=31527	64.0914
43095:5	1	S.MP[+15.995]LPPHPGHPGYINFS[+79.966]YEVLTP[+15.995]LKWYQSMIRHPYP.S		P[+16]*2, S[+80]	855.819	5	4275.07	4275.04	0	6.4	17	Non	28.04	28.04	0	2.57	1304	>sp|P02817|AMELX_BOVIN Amelogenin, X isoform OS=Bos taurus OX=9913 GN=AMELX PE=1 SV=2	1	hf1_10472_ebo_24_1_261219.ScanId;v=1;d1=31108.31108.5	controllerType=0 controllerNumber=1 scan=31108	63.3103
44683:5	1	S.MP[+15.995]LPPHPGHPGYINFS[+79.966]YEVLTPLKW[+15.995]YQSMIRHPYP.S		P[+16], S[+80], W[+16]	855.817	5	4275.06	4275.04	0	4.2	17	Non	39.57	39.57	0	2.44	1304	>sp|P02817|AMELX_BOVIN Amelogenin, X isoform OS=Bos taurus OX=9913 GN=AMELX PE=1 SV=2	1	hf1_10472_ebo_24_1_261219.ScanId;v=1;d1=32260.32260.5	controllerType=0 controllerNumber=1 scan=32260	65.8167
44821:5	1	S.MP[+15.995]LPPHPGHPGYINFS[+79.966]YEVLTP[+15.995]LKWYQSMIRHPYP.S		P[+16]*2, S[+80]	856.017	5	4276.06	4275.04	1	3.4	17	Non	62.95	62.95	4	2.62	1304	>sp|P02817|AMELX_BOVIN Amelogenin, X isoform OS=Bos taurus OX=9913 GN=AMELX PE=1 SV=2	1	hf1_10472_ebo_24_1_261219.ScanId;v=1;d1=32383.32383.5	controllerType=0 controllerNumber=1 scan=32383	66.1592
37931:4	1	S.MP[+15.995]LPPHPGHPGYIN[+0.984]FS[+79.966]YEVLTPLKWYQSMIRHPYP.S		N[+1], P[+16], S[+80]	1066.02	4	4261.04	4260.03	1	2.2	17	Non	67.89	67.89	1.35	2.19	1304	>sp|P02817|AMELX_BOVIN Amelogenin, X isoform OS=Bos taurus OX=9913 GN=AMELX PE=1 SV=2	1	hf1_10472_ebo_24_1_261219.ScanId;v=1;d1=27744.27744.4	controllerType=0 controllerNumber=1 scan=27744	57.2117
34429:6	1	S.MP[+15.995]LPPHPGHPGYINFS[+79.966]YEVLTPLKWYQ[+0.984]SMIRHPYP.S		P[+16], Q[+1], S[+80]	711.016	6	4261.06	4260.03	1	7	17	Non	71.97	71.97	5.8	2.19	1304	>sp|P02817|AMELX_BOVIN Amelogenin, X isoform OS=Bos taurus OX=9913 GN=AMELX PE=1 SV=2	1	hf1_10472_ebo_24_1_261219.ScanId;v=1;d1=25456.25456.6	controllerType=0 controllerNumber=1 scan=25456	53.0603
42830:5	1	S.MP[+15.995]LPPHPGHPGYINFS[+79.966]YEVLTPLKWYQSMIRH[+15.995]PYP.S		H[+16], P[+16], S[+80]	855.82	5	4275.07	4275.04	0	7.1	17	Non	86.42	86.42	0.4	3.16	1304	>sp|P02817|AMELX_BOVIN Amelogenin, X isoform OS=Bos taurus OX=9913 GN=AMELX PE=1 SV=2	1	hf1_10472_ebo_24_1_261219.ScanId;v=1;d1=30935.30935.5	controllerType=0 controllerNumber=1 scan=30935	62.9684
30131:5	1	S.MP[+15.995]LPPHPGHPGYINFS[+79.966]YEVLTPLKWYQSMIRH[+15.995]PYP.S		H[+16], P[+16], S[+80]	856.018	5	4276.06	4275.04	1	4.4	17	Non	92.55	92.55	0.4	2.2	1304	>sp|P02817|AMELX_BOVIN Amelogenin, X isoform OS=Bos taurus OX=9913 GN=AMELX PE=1 SV=2	1	hf1_10472_ebo_24_1_261219.ScanId;v=1;d1=22592.22592.5	controllerType=0 controllerNumber=1 scan=22592	47.9404
45115:5	1	S.MP[+15.995]LPPHPGHPGYINFS[+79.966]YEVLTPLKWY[+15.995]QSMIRHPYP.S		P[+16], S[+80], Y[+16]	855.811	5	4275.03	4275.04	0	-2.6	17	Non	94.55	94.55	0	2.26	1304	>sp|P02817|AMELX_BOVIN Amelogenin, X isoform OS=Bos taurus OX=9913 GN=AMELX PE=1 SV=2	1	hf1_10472_ebo_24_1_261219.ScanId;v=1;d1=32641.32641.5	controllerType=0 controllerNumber=1 scan=32641	66.8488
32824:6	1	S.MP[+15.995]LPPHPGHPGYINFS[+79.966]YEVLTP[+31.990]LKWYQSMIRHPYP.S		P[+16][+32], S[+80]	716.012	6	4291.04	4291.03	0	0.9	17	Non	120.03	120.03	2	2.35	1304	>sp|P02817|AMELX_BOVIN Amelogenin, X isoform OS=Bos taurus OX=9913 GN=AMELX PE=1 SV=2	1	hf1_10472_ebo_24_1_261219.ScanId;v=1;d1=24369.24369.6	controllerType=0 controllerNumber=1 scan=24369	51.0934
44971:5	1	S.MP[+15.995]LPPHPGHPGYINFS[+79.966]YEVLTPLKW[+15.995]YQSMIRHPYP.S		P[+16], S[+80], W[+16]	855.817	5	4275.05	4275.04	0	3.8	17	Non	122.17	122.17	0	3.08	1304	>sp|P02817|AMELX_BOVIN Amelogenin, X isoform OS=Bos taurus OX=9913 GN=AMELX PE=1 SV=2	1	hf1_10472_ebo_24_1_261219.ScanId;v=1;d1=32515.32515.5	controllerType=0 controllerNumber=1 scan=32515	66.5103
43373:5	1	S.MP[+15.995]LPPHPGHPGYINFS[+79.966]YEVLTPLKWY[+15.995]QSMIRHPYP.S		P[+16], S[+80], Y[+16]	855.819	5	4275.06	4275.04	0	5.9	17	Non	124.21	124.21	0	3.17	1304	>sp|P02817|AMELX_BOVIN Amelogenin, X isoform OS=Bos taurus OX=9913 GN=AMELX PE=1 SV=2	1	hf1_10472_ebo_24_1_261219.ScanId;v=1;d1=31291.31291.5	controllerType=0 controllerNumber=1 scan=31291	63.6656
30522:6	1	S.MP[+15.995]LPPHPGHPGYINFS[+79.966]YEVLTPLK[+15.995]WYQSMIRHPYP.S		K[+16], P[+16], S[+80]	713.35	6	4275.06	4275.04	0	5.4	17	Non	133.91	133.91	0	2.85	1304	>sp|P02817|AMELX_BOVIN Amelogenin, X isoform OS=Bos taurus OX=9913 GN=AMELX PE=1 SV=2	1	hf1_10472_ebo_24_1_261219.ScanId;v=1;d1=22846.22846.6	controllerType=0 controllerNumber=1 scan=22846	48.3866
29806:5	1	S.M[+15.995]PLPPHPGHPGYINFS[+79.966]YEVLTPLKWYQSM[+15.995]IRHPYP.S		M[+16]*2, S[+80]	856.017	5	4276.05	4275.04	1	3	17	Non	134.95	134.95	0	2.4	1304	>sp|P02817|AMELX_BOVIN Amelogenin, X isoform OS=Bos taurus OX=9913 GN=AMELX PE=1 SV=2	1	hf1_10472_ebo_24_1_261219.ScanId;v=1;d1=22384.22384.5	controllerType=0 controllerNumber=1 scan=22384	47.572
44446:5	1	S.M[+15.995]PLPPHPGHPGYINFS[+79.966]YEVLTPLKWYQSM[+15.995]IRHPYP.S		M[+16]*2, S[+80]	855.818	5	4275.06	4275.04	0	5.3	17	Non	148.67	148.67	0	3.17	1304	>sp|P02817|AMELX_BOVIN Amelogenin, X isoform OS=Bos taurus OX=9913 GN=AMELX PE=1 SV=2	1	hf1_10472_ebo_24_1_261219.ScanId;v=1;d1=32037.32037.5	controllerType=0 controllerNumber=1 scan=32037	65.1411
38321:5	1	S.MP[+15.995]LPPHPGHPGYINFS[+79.966]YEVLTPLKWY[+15.995]QSMIRHPYP.S		P[+16], S[+80], Y[+16]	855.818	5	4275.06	4275.04	0	5.2	17	Non	149.28	149.28	0	3.17	1304	>sp|P02817|AMELX_BOVIN Amelogenin, X isoform OS=Bos taurus OX=9913 GN=AMELX PE=1 SV=2	1	hf1_10472_ebo_24_1_261219.ScanId;v=1;d1=27997.27997.5	controllerType=0 controllerNumber=1 scan=27997	57.6703
34098:5	1	S.MP[+15.995]LPPHPGHPGYINFS[+79.966]YEVLTPLKWYQSM[+31.990]IRHPYP.S		M[+32], P[+16], S[+80]	859.015	5	4291.04	4291.03	0	2.5	17	Non	150.5	150.5	4	2.4	1304	>sp|P02817|AMELX_BOVIN Amelogenin, X isoform OS=Bos taurus OX=9913 GN=AMELX PE=1 SV=2	1	hf1_10472_ebo_24_1_261219.ScanId;v=1;d1=25238.25238.5	controllerType=0 controllerNumber=1 scan=25238	52.6746
30712:6	1	S.M[+15.995]PLPPHPGHPGYINFS[+79.966]YEVLTPLKWYQSM[+15.995]IRHPYP.S		M[+16]*2, S[+80]	713.182	6	4274.05	4275.04	-1	4.5	17	Non	159.57	159.57	0	2.46	1304	>sp|P02817|AMELX_BOVIN Amelogenin, X isoform OS=Bos taurus OX=9913 GN=AMELX PE=1 SV=2	1	hf1_10472_ebo_24_1_261219.ScanId;v=1;d1=22970.22970.6	controllerType=0 controllerNumber=1 scan=22970	48.6092
34450:5	1	S.M[+31.990]PLPPHPGHPGYINFS[+79.966]YEVLTPLKWYQSM[+15.995]IRHPYP.S		M[+16][+32], S[+80]	859.215	5	4292.04	4291.03	1	1.8	17	Non	161.22	161.22	0	3.3	1304	>sp|P02817|AMELX_BOVIN Amelogenin, X isoform OS=Bos taurus OX=9913 GN=AMELX PE=1 SV=2	1	hf1_10472_ebo_24_1_261219.ScanId;v=1;d1=25472.25472.4	controllerType=0 controllerNumber=1 scan=25472	53.0899
28390:4	1	S.MP[+15.995]LPPHPGHPGYINFS[+79.966]YEVLTP[+31.990]LKWYQSMIRHPYP.S		P[+16][+32], S[+80]	1073.77	4	4292.06	4291.03	1	6.5	17	Non	170.99	170.99	4	3.66	1304	>sp|P02817|AMELX_BOVIN Amelogenin, X isoform OS=Bos taurus OX=9913 GN=AMELX PE=1 SV=2	1	hf1_10472_ebo_24_1_261219.ScanId;v=1;d1=21459.21459.3	controllerType=0 controllerNumber=1 scan=21459	45.9436
33566:5	1	S.M[+31.990]PLPPHPGHPGYINFS[+79.966]YEVLTPLK[+15.995]WYQSMIRHPYP.S		K[+16], M[+32], S[+80]	859.218	5	4292.06	4291.03	1	5.3	17	Non	175.42	175.42	0	3.31	1304	>sp|P02817|AMELX_BOVIN Amelogenin, X isoform OS=Bos taurus OX=9913 GN=AMELX PE=1 SV=2	1	hf1_10472_ebo_24_1_261219.ScanId;v=1;d1=24891.24891.5	controllerType=0 controllerNumber=1 scan=24891	52.0468
30012:6	1	S.M[+15.995]PLPPHPGHPGYINFSYEVLTP[+31.990]LKWYQ[+0.984]SMIRHPYP.S		M[+16], P[+32], Q[+1]	702.685	6	4211.07	4212.05	-1	5.7	17	Non	177.42	177.42	0.23	4.01	1304	>sp|P02817|AMELX_BOVIN Amelogenin, X isoform OS=Bos taurus OX=9913 GN=AMELX PE=1 SV=2	1	hf1_10472_ebo_24_1_261219.ScanId;v=1;d1=22514.22514.6	controllerType=0 controllerNumber=1 scan=22514	47.8032
27728:4	1	S.M[+15.995]PLPPHPGHPGYINFS[+79.966]YEVLTPLKWY[+31.990]QSMIRHPYP.S		M[+16], S[+80], Y[+32]	1073.52	4	4291.07	4291.03	0	9.3	17	Non	188.03	188.03	0	3.51	1304	>sp|P02817|AMELX_BOVIN Amelogenin, X isoform OS=Bos taurus OX=9913 GN=AMELX PE=1 SV=2	1	hf1_10472_ebo_24_1_261219.ScanId;v=1;d1=20994.20994.4	controllerType=0 controllerNumber=1 scan=20994	45.1153
34983:4	1	S.M[+15.995]PLPPHPGHPGYINFS[+79.966]YEVLTPLKWYQSM[+15.995]IRHPYP.S		M[+16]*2, S[+80]	1069.76	4	4276.04	4275.04	1	-1.1	17	Non	190.31	190.31	0	2.43	1304	>sp|P02817|AMELX_BOVIN Amelogenin, X isoform OS=Bos taurus OX=9913 GN=AMELX PE=1 SV=2	1	hf1_10472_ebo_24_1_261219.ScanId;v=1;d1=25833.25833.4	controllerType=0 controllerNumber=1 scan=25833	53.7557
32201:5	1	S.M[+31.990]PLPPHPGHPGYINFS[+79.966]YEVLTPLKWY[+15.995]QSMIRHPYP.S		M[+32], S[+80], Y[+16]	859.014	5	4291.04	4291.03	0	1.9	17	Non	191.97	191.97	0	2.8	1304	>sp|P02817|AMELX_BOVIN Amelogenin, X isoform OS=Bos taurus OX=9913 GN=AMELX PE=1 SV=2	1	hf1_10472_ebo_24_1_261219.ScanId;v=1;d1=23954.23954.5	controllerType=0 controllerNumber=1 scan=23954	50.3596
38806:5	1	S.MP[+15.995]LPPHPGHPGYINFS[+79.966]YEVLTPLKWYQSM[+15.995]IRHPYP.S		M[+16], P[+16], S[+80]	855.817	5	4275.05	4275.04	0	3.8	17	Non	199.62	199.62	1.8	3.87	1304	>sp|P02817|AMELX_BOVIN Amelogenin, X isoform OS=Bos taurus OX=9913 GN=AMELX PE=1 SV=2	1	hf1_10472_ebo_24_1_261219.ScanId;v=1;d1=28311.28311.5	controllerType=0 controllerNumber=1 scan=28311	58.2325
29242:6	1	S.MP[+15.995]LPPHPGHPGYINFS[+79.966]YEVLTP[+31.990]LKWYQSMIRHPYP.S		P[+16][+32], S[+80]	716.016	6	4291.06	4291.03	0	6.6	17	Non	203.8	203.8	0.43	4.61	1304	>sp|P02817|AMELX_BOVIN Amelogenin, X isoform OS=Bos taurus OX=9913 GN=AMELX PE=1 SV=2	1	hf1_10472_ebo_24_1_261219.ScanId;v=1;d1=22018.22018.6	controllerType=0 controllerNumber=1 scan=22018	46.9254
31077:6	1	S.MP[+15.995]LPPHPGHPGYINFS[+79.966]YEVLTPLKW[+31.990]YQSMIRHPYP.S		P[+16], S[+80], W[+32]	716.181	6	4292.05	4291.03	1	2.3	17	Non	208.58	208.58	0	3.97	1304	>sp|P02817|AMELX_BOVIN Amelogenin, X isoform OS=Bos taurus OX=9913 GN=AMELX PE=1 SV=2	1	hf1_10472_ebo_24_1_261219.ScanId;v=1;d1=23208.23208.6	controllerType=0 controllerNumber=1 scan=23208	49.0327
31391:6	1	S.M[+31.990]PLPPHPGHPGYINFS[+79.966]YEVLTPLKWYQSMIRH[+15.995]PYP.S		H[+16], M[+32], S[+80]	716.015	6	4291.06	4291.03	0	5.2	17	Non	215.65	215.65	0	4.22	1304	>sp|P02817|AMELX_BOVIN Amelogenin, X isoform OS=Bos taurus OX=9913 GN=AMELX PE=1 SV=2	1	hf1_10472_ebo_24_1_261219.ScanId;v=1;d1=23411.23411.6	controllerType=0 controllerNumber=1 scan=23411	49.3877
36306:5	1	S.MP[+15.995]LPPHPGHPGYINFS[+79.966]YEVLTPLKWYQSMIR[+0.984]HPYP.S		P[+16], R[+1], S[+80]	853.02	5	4261.07	4260.03	1	8.9	17	Non	217.41	217.41	11.77	3.74	1304	>sp|P02817|AMELX_BOVIN Amelogenin, X isoform OS=Bos taurus OX=9913 GN=AMELX PE=1 SV=2	1	hf1_10472_ebo_24_1_261219.ScanId;v=1;d1=26698.26698.5	controllerType=0 controllerNumber=1 scan=26698	55.3226
35112:5	1	S.M[+15.995]PLPPHPGHPGYINFS[+79.966]YEVLTPLKWYQSM[+15.995]IRHPYP.S		M[+16]*2, S[+80]	855.818	5	4275.06	4275.04	0	5.1	17	Non	227.59	227.59	3.6	4.33	1304	>sp|P02817|AMELX_BOVIN Amelogenin, X isoform OS=Bos taurus OX=9913 GN=AMELX PE=1 SV=2	1	hf1_10472_ebo_24_1_261219.ScanId;v=1;d1=25921.25921.6	controllerType=0 controllerNumber=1 scan=25921	53.9196
32727:4	1	S.M[+15.995]PLPPHPGHPGYINFS[+79.966]YEVLTPLKW[+31.990]YQSMIRHPYP.S		M[+16], S[+80], W[+32]	1073.77	4	4292.05	4291.03	1	3.9	17	Non	237.77	237.77	0	3.39	1304	>sp|P02817|AMELX_BOVIN Amelogenin, X isoform OS=Bos taurus OX=9913 GN=AMELX PE=1 SV=2	1	hf1_10472_ebo_24_1_261219.ScanId;v=1;d1=24299.24299.4	controllerType=0 controllerNumber=1 scan=24299	50.9691
36186:5	1	S.M[+15.995]PLPPHPGHPGYINFS[+79.966]YEVLTPLKWYQSM[+15.995]IRHPYP.S		M[+16]*2, S[+80]	856.02	5	4276.07	4275.04	1	7	17	Non	256.18	256.18	1.36	5.57	1304	>sp|P02817|AMELX_BOVIN Amelogenin, X isoform OS=Bos taurus OX=9913 GN=AMELX PE=1 SV=2	1	hf1_10472_ebo_24_1_261219.ScanId;v=1;d1=26622.26622.6	controllerType=0 controllerNumber=1 scan=26622	55.1873
30398:4	1	S.M[+15.995]PLPPHPGHPGYINFS[+79.966]YEVLTPLKWYQSM[+15.995]IRHPYP.S		M[+16]*2, S[+80]	1069.27	4	4274.06	4275.04	-1	4.9	17	Non	273.88	273.88	0	4.89	1304	>sp|P02817|AMELX_BOVIN Amelogenin, X isoform OS=Bos taurus OX=9913 GN=AMELX PE=1 SV=2	1	hf1_10472_ebo_24_1_261219.ScanId;v=1;d1=22765.22765.4	controllerType=0 controllerNumber=1 scan=22765	48.2435
32804:5	1	S.MP[+15.995]LPPHPGHPGYINFS[+79.966]YEVLTPLKWYQSM[+31.990]IRHPYP.S		M[+32], P[+16], S[+80]	859.214	5	4292.04	4291.03	1	1.2	17	Non	275.92	275.92	4	4.74	1304	>sp|P02817|AMELX_BOVIN Amelogenin, X isoform OS=Bos taurus OX=9913 GN=AMELX PE=1 SV=2	1	hf1_10472_ebo_24_1_261219.ScanId;v=1;d1=24355.24355.5	controllerType=0 controllerNumber=1 scan=24355	51.0695
34845:5	1	S.MP[+15.995]LPPHPGHPGYINFS[+79.966]YEVLTPLKWYQSM[+15.995]IRHPYP.S		M[+16], P[+16], S[+80]	856.018	5	4276.06	4275.04	1	4	17	Non	318.19	318.19	8.91	5.41	1304	>sp|P02817|AMELX_BOVIN Amelogenin, X isoform OS=Bos taurus OX=9913 GN=AMELX PE=1 SV=2	1	hf1_10472_ebo_24_1_261219.ScanId;v=1;d1=25738.25738.6	controllerType=0 controllerNumber=1 scan=25738	53.5786
27815:4	1	S.M[+15.995]PLPPHPGHPGYINFS[+79.966]YEVLTPLKW[+31.990]YQSMIRHPYP.S		M[+16], S[+80], W[+32]	1073.52	4	4291.07	4291.03	0	8.3	17	Non	319.04	319.04	0	4.88	1304	>sp|P02817|AMELX_BOVIN Amelogenin, X isoform OS=Bos taurus OX=9913 GN=AMELX PE=1 SV=2	1	hf1_10472_ebo_24_1_261219.ScanId;v=1;d1=21060.21060.3	controllerType=0 controllerNumber=1 scan=21060	45.2319
31375:5	1	S.MP[+15.995]LPPHPGHPGYINFS[+79.966]YEVLTPLKWY[+31.990]QSMIRHPYP.S		P[+16], S[+80], Y[+32]	859.018	5	4291.06	4291.03	0	5.8	17	Non	321.61	321.61	4	5.79	1304	>sp|P02817|AMELX_BOVIN Amelogenin, X isoform OS=Bos taurus OX=9913 GN=AMELX PE=1 SV=2	1	hf1_10472_ebo_24_1_261219.ScanId;v=1;d1=23399.23399.5	controllerType=0 controllerNumber=1 scan=23399	49.3677
33097:5	1	S.MP[+15.995]LPPHPGHPGYINFS[+79.966]YEVLTPLKWYQSM[+31.990]IRHPYP.S		M[+32], P[+16], S[+80]	859.214	5	4292.04	4291.03	1	1.3	17	Non	335.36	335.36	4	5.36	1304	>sp|P02817|AMELX_BOVIN Amelogenin, X isoform OS=Bos taurus OX=9913 GN=AMELX PE=1 SV=2	1	hf1_10472_ebo_24_1_261219.ScanId;v=1;d1=24555.24555.5	controllerType=0 controllerNumber=1 scan=24555	51.4279
27709:5	1	S.MP[+15.995]LPPHPGHPGYINFS[+79.966]YEVLTPLKW[+31.990]YQSMIRHPYP.S		P[+16], S[+80], W[+32]	859.018	5	4291.06	4291.03	0	5.9	17	Non	344.02	344.02	0	5.8	1304	>sp|P02817|AMELX_BOVIN Amelogenin, X isoform OS=Bos taurus OX=9913 GN=AMELX PE=1 SV=2	1	hf1_10472_ebo_24_1_261219.ScanId;v=1;d1=20981.20981.5	controllerType=0 controllerNumber=1 scan=20981	45.0928
35820:5	1	S.M[+15.995]PLPPHPGHP[+15.995]GYINFS[+79.966]YEVLTPLKWYQSMIRHPYP.S		M[+16], P[+16], S[+80]	856.017	5	4276.05	4275.04	1	2.9	17	Non	344.59	344.59	4.9	5.55	1304	>sp|P02817|AMELX_BOVIN Amelogenin, X isoform OS=Bos taurus OX=9913 GN=AMELX PE=1 SV=2	1	hf1_10472_ebo_24_1_261219.ScanId;v=1;d1=26391.26391.5	controllerType=0 controllerNumber=1 scan=26391	54.7742
32429:4	1	S.M[+15.995]PLPPHPGHPGYINFS[+79.966]YEVLTPLKWYQSM[+31.990]IRHPYP.S		M[+16][+32], S[+80]	1073.77	4	4292.06	4291.03	1	6.4	17	Non	351.33	351.33	10.18	5.58	1304	>sp|P02817|AMELX_BOVIN Amelogenin, X isoform OS=Bos taurus OX=9913 GN=AMELX PE=1 SV=2	1	hf1_10472_ebo_24_1_261219.ScanId;v=1;d1=24100.24100.4	controllerType=0 controllerNumber=1 scan=24100	50.616
29555:6	1	S.MP[+15.995]LPPHPGHPGYINFS[+79.966]YEVLTPLKW[+31.990]YQSMIRHPYP.S		P[+16], S[+80], W[+32]	716.016	6	4291.06	4291.03	0	6.7	17	Non	352.2	352.2	0.23	5.92	1304	>sp|P02817|AMELX_BOVIN Amelogenin, X isoform OS=Bos taurus OX=9913 GN=AMELX PE=1 SV=2	1	hf1_10472_ebo_24_1_261219.ScanId;v=1;d1=22221.22221.6	controllerType=0 controllerNumber=1 scan=22221	47.2831
34310:4	1	S.M[+15.995]PLPPHPGHPGYINFS[+79.966]YEVLTPLKWYQSM[+15.995]IRHPYP.S		M[+16]*2, S[+80]	1069.77	4	4276.06	4275.04	1	3.5	17	Non	368.36	368.36	0	6.17	1304	>sp|P02817|AMELX_BOVIN Amelogenin, X isoform OS=Bos taurus OX=9913 GN=AMELX PE=1 SV=2	1	hf1_10472_ebo_24_1_261219.ScanId;v=1;d1=25378.25378.4	controllerType=0 controllerNumber=1 scan=25378	52.9211
33486:6	1	S.MP[+15.995]LPPHPGHPGYINFS[+79.966]YEVLTPLKWYQSMIRH[+15.995]PYP.S		H[+16], P[+16], S[+80]	713.515	6	4276.05	4275.04	1	2.1	17	Non	376.59	376.59	0.4	6.16	1304	>sp|P02817|AMELX_BOVIN Amelogenin, X isoform OS=Bos taurus OX=9913 GN=AMELX PE=1 SV=2	1	hf1_10472_ebo_24_1_261219.ScanId;v=1;d1=24831.24831.6	controllerType=0 controllerNumber=1 scan=24831	51.9346
29151:5	1	S.MP[+15.995]LPPHPGHPGYINFS[+79.966]YEVLTPLKW[+31.990]YQSMIRHPYP.S		P[+16], S[+80], W[+32]	859.016	5	4291.05	4291.03	0	4.5	17	Non	387.92	387.92	4	6.72	1304	>sp|P02817|AMELX_BOVIN Amelogenin, X isoform OS=Bos taurus OX=9913 GN=AMELX PE=1 SV=2	1	hf1_10472_ebo_24_1_261219.ScanId;v=1;d1=21958.21958.5	controllerType=0 controllerNumber=1 scan=21958	46.8217
32374:6	1	S.MP[+15.995]LPPHPGHPGYINFS[+79.966]YEVLTPLKW[+15.995]YQSMIRHPYP.S		P[+16], S[+80], W[+16]	713.348	6	4275.05	4275.04	0	3.2	17	Non	388.17	388.17	1.8	6.54	1304	>sp|P02817|AMELX_BOVIN Amelogenin, X isoform OS=Bos taurus OX=9913 GN=AMELX PE=1 SV=2	1	hf1_10472_ebo_24_1_261219.ScanId;v=1;d1=24065.24065.6	controllerType=0 controllerNumber=1 scan=24065	50.5565
29634:4	1	S.M[+15.995]PLPPHPGHPGYINFS[+79.966]YEVLTPLKW[+31.990]YQSMIRHPYP.S		M[+16], S[+80], W[+32]	1073.52	4	4291.07	4291.03	0	8.9	17	Non	399.02	399.02	12.83	6.08	1304	>sp|P02817|AMELX_BOVIN Amelogenin, X isoform OS=Bos taurus OX=9913 GN=AMELX PE=1 SV=2	1	hf1_10472_ebo_24_1_261219.ScanId;v=1;d1=22272.22272.3	controllerType=0 controllerNumber=1 scan=22272	47.3711
32127:4	1	S.M[+31.990]PLPPHPGHPGYINFS[+79.966]YEVLTPLKWYQSM[+15.995]IRHPYP.S		M[+16][+32], S[+80]	1073.77	4	4292.05	4291.03	1	2.7	17	Non	401.54	401.54	0	5.93	1304	>sp|P02817|AMELX_BOVIN Amelogenin, X isoform OS=Bos taurus OX=9913 GN=AMELX PE=1 SV=2	1	hf1_10472_ebo_24_1_261219.ScanId;v=1;d1=23905.23905.4	controllerType=0 controllerNumber=1 scan=23905	50.2665
31056:5	1	S.MP[+15.995]LPPHPGHPGYINFS[+79.966]YEVLTPLKWYQSM[+31.990]IRHPYP.S		M[+32], P[+16], S[+80]	859.215	5	4292.05	4291.03	1	2.2	17	Non	406.96	406.96	0	6.53	1304	>sp|P02817|AMELX_BOVIN Amelogenin, X isoform OS=Bos taurus OX=9913 GN=AMELX PE=1 SV=2	1	hf1_10472_ebo_24_1_261219.ScanId;v=1;d1=23194.23194.5	controllerType=0 controllerNumber=1 scan=23194	49.0092
30667:5	1	S.MP[+15.995]LPPHPGHPGYINFS[+79.966]YEVLTPLKWYQSM[+31.990]IRHPYP.S		M[+32], P[+16], S[+80]	859.216	5	4292.05	4291.03	1	2.8	17	Non	419.91	419.91	4	6.53	1304	>sp|P02817|AMELX_BOVIN Amelogenin, X isoform OS=Bos taurus OX=9913 GN=AMELX PE=1 SV=2	1	hf1_10472_ebo_24_1_261219.ScanId;v=1;d1=22940.22940.5	controllerType=0 controllerNumber=1 scan=22940	48.5556
34084:5	1	S.M[+15.995]PLPPHPGHPGYINFS[+79.966]YEVLTPLKWYQSM[+15.995]IRHPYP.S		M[+16]*2, S[+80]	856.015	5	4276.05	4275.04	1	1.5	17	Non	428.69	428.69	0.27	6.04	1304	>sp|P02817|AMELX_BOVIN Amelogenin, X isoform OS=Bos taurus OX=9913 GN=AMELX PE=1 SV=2	1	hf1_10472_ebo_24_1_261219.ScanId;v=1;d1=25230.25230.5	controllerType=0 controllerNumber=1 scan=25230	52.6598
34056:5	1	S.MPLPPHPGHPGYINFS[+79.966]YEVLTPLKWYQ[+0.984]SM[+15.995]IRHPYP.S		M[+16], Q[+1], S[+80]	852.617	5	4259.06	4260.03	-1	7.5	17	Non	430.13	430.13	5.27	6.87	1304	>sp|P02817|AMELX_BOVIN Amelogenin, X isoform OS=Bos taurus OX=9913 GN=AMELX PE=1 SV=2	1	hf1_10472_ebo_24_1_261219.ScanId;v=1;d1=25212.25212.5	controllerType=0 controllerNumber=1 scan=25212	52.6303
32946:6	1	S.MP[+15.995]LPPHPGHPGYINFS[+79.966]YEVLTPLKWY[+15.995]QSMIRHPYP.S		P[+16], S[+80], Y[+16]	713.347	6	4275.04	4275.04	0	1.4	17	Non	433.48	433.48	4	6.12	1304	>sp|P02817|AMELX_BOVIN Amelogenin, X isoform OS=Bos taurus OX=9913 GN=AMELX PE=1 SV=2	1	hf1_10472_ebo_24_1_261219.ScanId;v=1;d1=24454.24454.6	controllerType=0 controllerNumber=1 scan=24454	51.2461
33934:4	1	S.M[+15.995]PLPPHPGHPGYINFS[+79.966]YEVLTPLKWYQSM[+15.995]IRHPYP.S		M[+16]*2, S[+80]	1069.52	4	4275.04	4275.04	0	1.2	17	Non	438.75	438.75	0	5.59	1304	>sp|P02817|AMELX_BOVIN Amelogenin, X isoform OS=Bos taurus OX=9913 GN=AMELX PE=1 SV=2	1	hf1_10472_ebo_24_1_261219.ScanId;v=1;d1=25125.25125.4	controllerType=0 controllerNumber=1 scan=25125	52.4646
28838:5	1	S.MP[+15.995]LPPHPGHPGYINFS[+79.966]YEVLTPLKWYQSM[+31.990]IRHPYP.S		M[+32], P[+16], S[+80]	859.217	5	4292.05	4291.03	1	4.1	17	Non	446.18	446.18	0.4	6.99	1304	>sp|P02817|AMELX_BOVIN Amelogenin, X isoform OS=Bos taurus OX=9913 GN=AMELX PE=1 SV=2	1	hf1_10472_ebo_24_1_261219.ScanId;v=1;d1=21759.21759.5	controllerType=0 controllerNumber=1 scan=21759	46.472
47242:6	1	S.M[+15.995]PLPPHPGHPGYINFS[+79.966]YEVLTPLKWYQSM[+15.995]IRHPYP.S		M[+16]*2, S[+80]	713.351	6	4275.07	4275.04	0	8	17	Non	449.6	449.6	0	7.37	1304	>sp|P02817|AMELX_BOVIN Amelogenin, X isoform OS=Bos taurus OX=9913 GN=AMELX PE=1 SV=2	1	hf1_10472_ebo_24_1_261219.ScanId;v=1;d1=34805.34805.6	controllerType=0 controllerNumber=1 scan=34805	73.6468
33226:6	1	S.M[+15.995]PLPPHPGHPGYINFS[+79.966]YEVLTPLKWYQSM[+15.995]IRHPYP.S		M[+16]*2, S[+80]	713.514	6	4276.05	4275.04	1	1.3	17	Non	455.01	455.01	0	6.31	1304	>sp|P02817|AMELX_BOVIN Amelogenin, X isoform OS=Bos taurus OX=9913 GN=AMELX PE=1 SV=2	1	hf1_10472_ebo_24_1_261219.ScanId;v=1;d1=24645.24645.6	controllerType=0 controllerNumber=1 scan=24645	51.5917
30434:5	1	S.MP[+15.995]LPPHPGHPGYINFS[+79.966]YEVLTPLKWY[+15.995]QSMIRHPYP.S		P[+16], S[+80], Y[+16]	855.818	5	4275.06	4275.04	0	5.7	17	Non	473.48	473.48	0.19	7.02	1304	>sp|P02817|AMELX_BOVIN Amelogenin, X isoform OS=Bos taurus OX=9913 GN=AMELX PE=1 SV=2	1	hf1_10472_ebo_24_1_261219.ScanId;v=1;d1=22789.22789.5	controllerType=0 controllerNumber=1 scan=22789	48.288
31557:4	1	S.M[+31.990]PLPPHPGHPGYINFS[+79.966]YEVLTPLKWYQSM[+15.995]IRHPYP.S		M[+16][+32], S[+80]	1073.52	4	4291.06	4291.03	0	5.3	17	Non	495.06	495.06	0	6.63	1304	>sp|P02817|AMELX_BOVIN Amelogenin, X isoform OS=Bos taurus OX=9913 GN=AMELX PE=1 SV=2	1	hf1_10472_ebo_24_1_261219.ScanId;v=1;d1=23521.23521.4	controllerType=0 controllerNumber=1 scan=23521	49.5803
31511:6	1	S.MP[+15.995]LPPHPGHPGYINFS[+79.966]YEVLTPLKWY[+15.995]QSMIRHPYP.S		P[+16], S[+80], Y[+16]	713.349	6	4275.06	4275.04	0	4.8	17	Non	503.33	503.33	4	7.24	1304	>sp|P02817|AMELX_BOVIN Amelogenin, X isoform OS=Bos taurus OX=9913 GN=AMELX PE=1 SV=2	1	hf1_10472_ebo_24_1_261219.ScanId;v=1;d1=23492.23492.6	controllerType=0 controllerNumber=1 scan=23492	49.5282
28544:5	1	S.MP[+15.995]LPPHPGHPGYINFS[+79.966]YEVLTPLKWY[+31.990]QSMIRHPYP.S		P[+16], S[+80], Y[+32]	859.018	5	4291.06	4291.03	0	6	17	Non	510.29	510.29	0	7.35	1304	>sp|P02817|AMELX_BOVIN Amelogenin, X isoform OS=Bos taurus OX=9913 GN=AMELX PE=1 SV=2	1	hf1_10472_ebo_24_1_261219.ScanId;v=1;d1=21561.21561.5	controllerType=0 controllerNumber=1 scan=21561	46.1239
30638:4	1	S.M[+15.995]PLPPHPGHPGYINFS[+79.966]YEVLTPLKW[+31.990]YQSMIRHPYP.S		M[+16], S[+80], W[+32]	1073.77	4	4292.04	4291.03	1	1.5	17	Non	522.44	522.44	12.63	5.91	1304	>sp|P02817|AMELX_BOVIN Amelogenin, X isoform OS=Bos taurus OX=9913 GN=AMELX PE=1 SV=2	1	hf1_10472_ebo_24_1_261219.ScanId;v=1;d1=22921.22921.4	controllerType=0 controllerNumber=1 scan=22921	48.5187
27977:5	1	S.MP[+15.995]LPPHPGHPGYINFS[+79.966]YEVLTPLKW[+31.990]YQSMIRHPYP.S		P[+16], S[+80], W[+32]	859.018	5	4291.06	4291.03	0	6.7	17	Non	532.59	532.59	0.5	8.06	1304	>sp|P02817|AMELX_BOVIN Amelogenin, X isoform OS=Bos taurus OX=9913 GN=AMELX PE=1 SV=2	1	hf1_10472_ebo_24_1_261219.ScanId;v=1;d1=21172.21172.5	controllerType=0 controllerNumber=1 scan=21172	45.4349
28260:5	1	S.MP[+15.995]LPPHPGHPGYINFS[+79.966]YEVLTPLKW[+31.990]YQSMIRHPYP.S		P[+16], S[+80], W[+32]	859.017	5	4291.06	4291.03	0	5.7	17	Non	537.01	537.01	0.32	7.37	1304	>sp|P02817|AMELX_BOVIN Amelogenin, X isoform OS=Bos taurus OX=9913 GN=AMELX PE=1 SV=2	1	hf1_10472_ebo_24_1_261219.ScanId;v=1;d1=21367.21367.5	controllerType=0 controllerNumber=1 scan=21367	45.7766
37724:5	1	S.MP[+15.995]LPPHPGHPGYINFS[+79.966]YEVLTPLKWYQ[+0.984]SMIRHPYP.S		P[+16], Q[+1], S[+80]	852.816	5	4260.05	4260.03	0	5.4	17	Non	542.09	542.09	7.11	7.82	1304	>sp|P02817|AMELX_BOVIN Amelogenin, X isoform OS=Bos taurus OX=9913 GN=AMELX PE=1 SV=2	1	hf1_10472_ebo_24_1_261219.ScanId;v=1;d1=27618.27618.5	controllerType=0 controllerNumber=1 scan=27618	56.9893
31798:6	1	S.M[+15.995]PLPPHPGHPGYINFS[+79.966]YEVLTPLKWYQSM[+15.995]IRHPYP.S		M[+16]*2, S[+80]	713.349	6	4275.06	4275.04	0	4.8	17	Non	545.71	545.71	0	7.26	1304	>sp|P02817|AMELX_BOVIN Amelogenin, X isoform OS=Bos taurus OX=9913 GN=AMELX PE=1 SV=2	1	hf1_10472_ebo_24_1_261219.ScanId;v=1;d1=23683.23683.6	controllerType=0 controllerNumber=1 scan=23683	49.872
47248:5	1	S.M[+15.995]PLPPHPGHPGYINFS[+79.966]YEVLTPLKW[+31.990]YQSMIRHPYP.S		M[+16], S[+80], W[+32]	859.02	5	4291.07	4291.03	0	8.9	17	Non	550.16	550.16	0	7.03	1304	>sp|P02817|AMELX_BOVIN Amelogenin, X isoform OS=Bos taurus OX=9913 GN=AMELX PE=1 SV=2	1	hf1_10472_ebo_24_1_261219.ScanId;v=1;d1=34808.34808.5	controllerType=0 controllerNumber=1 scan=34808	73.6513
33272:3	1	S.M[+15.995]PLPPHPGHPGYINFS[+79.966]YEVLTPLKWYQSM[+15.995]IRHPYP.S		M[+16]*2, S[+80]	1426.02	3	4276.06	4275.04	1	3.7	17	Non	561.41	561.41	0	6.07	1304	>sp|P02817|AMELX_BOVIN Amelogenin, X isoform OS=Bos taurus OX=9913 GN=AMELX PE=1 SV=2	1	hf1_10472_ebo_24_1_261219.ScanId;v=1;d1=24680.24680.3	controllerType=0 controllerNumber=1 scan=24680	51.6576
32081:6	1	S.MP[+15.995]LPPHPGHPGYINFS[+79.966]YEVLTPLKWY[+15.995]QSMIRHPYP.S		P[+16], S[+80], Y[+16]	713.349	6	4275.06	4275.04	0	5	17	Non	564.52	564.52	4	8.07	1304	>sp|P02817|AMELX_BOVIN Amelogenin, X isoform OS=Bos taurus OX=9913 GN=AMELX PE=1 SV=2	1	hf1_10472_ebo_24_1_261219.ScanId;v=1;d1=23874.23874.6	controllerType=0 controllerNumber=1 scan=23874	50.2117
29759:5	1	S.M[+15.995]PLPPHPGHPGYINFS[+79.966]YEVLTPLKW[+31.990]YQSMIRHPYP.S		M[+16], S[+80], W[+32]	859.019	5	4291.07	4291.03	0	7.6	17	Non	569.03	569.03	0.51	8.87	1304	>sp|P02817|AMELX_BOVIN Amelogenin, X isoform OS=Bos taurus OX=9913 GN=AMELX PE=1 SV=2	1	hf1_10472_ebo_24_1_261219.ScanId;v=1;d1=22353.22353.5	controllerType=0 controllerNumber=1 scan=22353	47.5164
33760:5	1	S.MP[+15.995]LPPHPGHPGYINFS[+79.966]YEVLTPLKWY[+15.995]QSMIRHPYP.S		P[+16], S[+80], Y[+16]	856.015	5	4276.05	4275.04	1	1.4	17	Non	570.63	570.63	3.8	8.04	1304	>sp|P02817|AMELX_BOVIN Amelogenin, X isoform OS=Bos taurus OX=9913 GN=AMELX PE=1 SV=2	1	hf1_10472_ebo_24_1_261219.ScanId;v=1;d1=25016.25016.5	controllerType=0 controllerNumber=1 scan=25016	52.2719
30945:4	1	S.M[+15.995]PLPPHPGHPGYINFS[+79.966]YEVLTPLKW[+31.990]YQSMIRHPYP.S		M[+16], S[+80], W[+32]	1073.76	4	4292.03	4291.03	1	-0.7	17	Non	588.13	588.13	14.14	6.77	1304	>sp|P02817|AMELX_BOVIN Amelogenin, X isoform OS=Bos taurus OX=9913 GN=AMELX PE=1 SV=2	1	hf1_10472_ebo_24_1_261219.ScanId;v=1;d1=23122.23122.4	controllerType=0 controllerNumber=1 scan=23122	48.8793
33625:4	1	S.M[+15.995]PLPPHPGHPGYINFS[+79.966]YEVLTPLKWY[+15.995]QSMIRHPYP.S		M[+16], S[+80], Y[+16]	1069.77	4	4276.05	4275.04	1	2.9	17	Non	597.91	597.91	4.43	7.48	1304	>sp|P02817|AMELX_BOVIN Amelogenin, X isoform OS=Bos taurus OX=9913 GN=AMELX PE=1 SV=2	1	hf1_10472_ebo_24_1_261219.ScanId;v=1;d1=24928.24928.4	controllerType=0 controllerNumber=1 scan=24928	52.1167
30367:5	1	S.MP[+15.995]LPPHPGHPGYINFS[+79.966]YEVLTPLKW[+31.990]YQSMIRHPYP.S		P[+16], S[+80], W[+32]	859.017	5	4291.06	4291.03	0	5.7	17	Non	624.78	624.78	0.32	9.63	1304	>sp|P02817|AMELX_BOVIN Amelogenin, X isoform OS=Bos taurus OX=9913 GN=AMELX PE=1 SV=2	1	hf1_10472_ebo_24_1_261219.ScanId;v=1;d1=22745.22745.5	controllerType=0 controllerNumber=1 scan=22745	48.2113
32540:4	1	S.M[+15.995]PLPPHPGHPGYINFS[+79.966]YEVLTPLKWYQSM[+15.995]IRHPYP.S		M[+16]*2, S[+80]	1069.52	4	4275.07	4275.04	0	6.7	17	Non	638.53	638.53	0	9.42	1304	>sp|P02817|AMELX_BOVIN Amelogenin, X isoform OS=Bos taurus OX=9913 GN=AMELX PE=1 SV=2	1	hf1_10472_ebo_24_1_261219.ScanId;v=1;d1=24172.24172.4	controllerType=0 controllerNumber=1 scan=24172	50.7452
33482:5	1	S.MP[+15.995]LPPHPGHPGYINFS[+79.966]YEVLTPLKWYQSM[+15.995]IRHPYP.S		M[+16], P[+16], S[+80]	856.016	5	4276.05	4275.04	1	2.4	17	Non	677.07	677.07	5.94	10.37	1304	>sp|P02817|AMELX_BOVIN Amelogenin, X isoform OS=Bos taurus OX=9913 GN=AMELX PE=1 SV=2	1	hf1_10472_ebo_24_1_261219.ScanId;v=1;d1=24827.24827.5	controllerType=0 controllerNumber=1 scan=24827	51.926
29288:4	1	S.M[+15.995]PLPPHPGHPGYINFS[+79.966]YEVLTPLKW[+31.990]YQSMIRHPYP.S		M[+16], S[+80], W[+32]	1073.52	4	4291.07	4291.03	0	7.7	17	Non	684.39	684.39	1.14	10.42	1304	>sp|P02817|AMELX_BOVIN Amelogenin, X isoform OS=Bos taurus OX=9913 GN=AMELX PE=1 SV=2	1	hf1_10472_ebo_24_1_261219.ScanId;v=1;d1=22049.22049.4	controllerType=0 controllerNumber=1 scan=22049	46.9804
31782:5	1	S.M[+15.995]PLPPHPGHPGYINFS[+79.966]YEVLTPLKWYQSM[+15.995]IRHPYP.S		M[+16]*2, S[+80]	855.818	5	4275.06	4275.04	0	5.3	17	Non	687.29	687.29	0	10.63	1304	>sp|P02817|AMELX_BOVIN Amelogenin, X isoform OS=Bos taurus OX=9913 GN=AMELX PE=1 SV=2	1	hf1_10472_ebo_24_1_261219.ScanId;v=1;d1=23672.23672.5	controllerType=0 controllerNumber=1 scan=23672	49.8529
32657:5	1	S.M[+15.995]PLPPHPGHPGYINFS[+79.966]YEVLTPLKWYQSM[+15.995]IRHPYP.S		M[+16]*2, S[+80]	856.015	5	4276.05	4275.04	1	1.6	17	Non	691.11	691.11	0	10.04	1304	>sp|P02817|AMELX_BOVIN Amelogenin, X isoform OS=Bos taurus OX=9913 GN=AMELX PE=1 SV=2	1	hf1_10472_ebo_24_1_261219.ScanId;v=1;d1=24249.24249.5	controllerType=0 controllerNumber=1 scan=24249	50.8785
30056:5	1	S.MP[+15.995]LPPHPGHPGYINFS[+79.966]YEVLTPLKWY[+31.990]QSMIRHPYP.S		P[+16], S[+80], Y[+32]	859.019	5	4291.06	4291.03	0	7	17	Non	709.23	709.23	0	11.87	1304	>sp|P02817|AMELX_BOVIN Amelogenin, X isoform OS=Bos taurus OX=9913 GN=AMELX PE=1 SV=2	1	hf1_10472_ebo_24_1_261219.ScanId;v=1;d1=22545.22545.5	controllerType=0 controllerNumber=1 scan=22545	47.8581
29452:5	1	S.M[+15.995]PLPPHPGHPGYINFS[+79.966]YEVLTPLKWY[+31.990]QSMIRHPYP.S		M[+16], S[+80], Y[+32]	859.019	5	4291.06	4291.03	0	7.2	17	Non	710.69	710.69	0	11.87	1304	>sp|P02817|AMELX_BOVIN Amelogenin, X isoform OS=Bos taurus OX=9913 GN=AMELX PE=1 SV=2	1	hf1_10472_ebo_24_1_261219.ScanId;v=1;d1=22155.22155.5	controllerType=0 controllerNumber=1 scan=22155	47.1671
31493:5	1	S.MP[+15.995]LPPHPGHPGYINFS[+79.966]YEVLTPLKWY[+15.995]QSMIRHPYP.S		P[+16], S[+80], Y[+16]	855.819	5	4275.06	4275.04	0	6	17	Non	715.05	715.05	0	11.63	1304	>sp|P02817|AMELX_BOVIN Amelogenin, X isoform OS=Bos taurus OX=9913 GN=AMELX PE=1 SV=2	1	hf1_10472_ebo_24_1_261219.ScanId;v=1;d1=23480.23480.5	controllerType=0 controllerNumber=1 scan=23480	49.5073
33212:5	1	S.M[+15.995]PLPPHPGHPGYINFS[+79.966]YEVLTPLKWYQSM[+15.995]IRHPYP.S		M[+16]*2, S[+80]	856.016	5	4276.05	4275.04	1	1.9	17	Non	728.7	728.7	11.14	11.04	1304	>sp|P02817|AMELX_BOVIN Amelogenin, X isoform OS=Bos taurus OX=9913 GN=AMELX PE=1 SV=2	1	hf1_10472_ebo_24_1_261219.ScanId;v=1;d1=24634.24634.5	controllerType=0 controllerNumber=1 scan=24634	51.5729
47266:5	1	S.M[+15.995]PLPPHPGHPGYINFS[+79.966]YEVLTPLKWYQSM[+15.995]IRHPYP.S		M[+16]*2, S[+80]	855.821	5	4275.07	4275.04	0	8.3	17	Non	745.46	745.46	0	11.29	1304	>sp|P02817|AMELX_BOVIN Amelogenin, X isoform OS=Bos taurus OX=9913 GN=AMELX PE=1 SV=2	1	hf1_10472_ebo_24_1_261219.ScanId;v=1;d1=34820.34820.5	controllerType=0 controllerNumber=1 scan=34820	73.6769
32925:5	1	S.MP[+15.995]LPPHPGHPGYINFS[+79.966]YEVLTPLKW[+15.995]YQSMIRHPYP.S		P[+16], S[+80], W[+16]	856.015	5	4276.05	4275.04	1	0.8	17	Non	747.21	747.21	2	11.04	1304	>sp|P02817|AMELX_BOVIN Amelogenin, X isoform OS=Bos taurus OX=9913 GN=AMELX PE=1 SV=2	1	hf1_10472_ebo_24_1_261219.ScanId;v=1;d1=24442.24442.5	controllerType=0 controllerNumber=1 scan=24442	51.2261
30000:4	1	S.M[+15.995]PLPPHPGHPGYINFS[+79.966]YEVLTPLKWYQSM[+31.990]IRHPYP.S		M[+16][+32], S[+80]	1073.52	4	4291.06	4291.03	0	5.5	17	Non	766.84	766.84	10.11	12.18	1304	>sp|P02817|AMELX_BOVIN Amelogenin, X isoform OS=Bos taurus OX=9913 GN=AMELX PE=1 SV=2	1	hf1_10472_ebo_24_1_261219.ScanId;v=1;d1=22506.22506.4	controllerType=0 controllerNumber=1 scan=22506	47.7882
32064:5	1	S.MP[+15.995]LPPHPGHPGYINFS[+79.966]YEVLTPLKW[+15.995]YQSMIRHPYP.S		P[+16], S[+80], W[+16]	855.819	5	4275.06	4275.04	0	5.9	17	Non	797.06	797.06	1.96	12.63	1304	>sp|P02817|AMELX_BOVIN Amelogenin, X isoform OS=Bos taurus OX=9913 GN=AMELX PE=1 SV=2	1	hf1_10472_ebo_24_1_261219.ScanId;v=1;d1=23863.23863.5	controllerType=0 controllerNumber=1 scan=23863	50.1924
31512:4	1	S.M[+15.995]PLPPHPGHPGYINFS[+79.966]YEVLTPLKWYQSM[+15.995]IRHPYP.S		M[+16]*2, S[+80]	1069.52	4	4275.06	4275.04	0	6.2	17	Non	800.28	800.28	0	13.18	1304	>sp|P02817|AMELX_BOVIN Amelogenin, X isoform OS=Bos taurus OX=9913 GN=AMELX PE=1 SV=2	1	hf1_10472_ebo_24_1_261219.ScanId;v=1;d1=23493.23493.5	controllerType=0 controllerNumber=1 scan=23493	49.5297
32357:5	1	S.MP[+15.995]LPPHPGHPGYINFS[+79.966]YEVLTPLKWY[+15.995]QSMIRHPYP.S		P[+16], S[+80], Y[+16]	856.017	5	4276.06	4275.04	1	3.2	17	Non	846.45	846.45	3.8	13.37	1304	>sp|P02817|AMELX_BOVIN Amelogenin, X isoform OS=Bos taurus OX=9913 GN=AMELX PE=1 SV=2	1	hf1_10472_ebo_24_1_261219.ScanId;v=1;d1=24054.24054.5	controllerType=0 controllerNumber=1 scan=24054	50.5371
33095:4	1	S.M[+15.995]PLPPHPGHPGYINFS[+79.966]YEVLTPLKW[+15.995]YQSMIRHPYP.S		M[+16], S[+80], W[+16]	1069.77	4	4276.05	4275.04	1	0.9	17	Non	925.85	925.85	2.13	14.59	1304	>sp|P02817|AMELX_BOVIN Amelogenin, X isoform OS=Bos taurus OX=9913 GN=AMELX PE=1 SV=2	1	hf1_10472_ebo_24_1_261219.ScanId;v=1;d1=24554.24554.4	controllerType=0 controllerNumber=1 scan=24554	51.4266
31877:3	1	S.M[+15.995]PLPPHPGHPGYINFS[+79.966]YEVLTPLKWYQSM[+15.995]IRHPYP.S		M[+16]*2, S[+80]	1425.7	3	4275.08	4275.04	0	8.9	17	Non	969.95	969.95	0	14.86	1304	>sp|P02817|AMELX_BOVIN Amelogenin, X isoform OS=Bos taurus OX=9913 GN=AMELX PE=1 SV=2	1	hf1_10472_ebo_24_1_261219.ScanId;v=1;d1=23736.23736.3	controllerType=0 controllerNumber=1 scan=23736	49.9632
31568:3	1	S.M[+15.995]PLPPHPGHPGYINFS[+79.966]YEVLTPLKWYQSM[+15.995]IRHPYP.S		M[+16]*2, S[+80]	1425.69	3	4275.06	4275.04	0	6.2	17	Non	979.82	979.82	0	15.2	1304	>sp|P02817|AMELX_BOVIN Amelogenin, X isoform OS=Bos taurus OX=9913 GN=AMELX PE=1 SV=2	1	hf1_10472_ebo_24_1_261219.ScanId;v=1;d1=23528.23528.3	controllerType=0 controllerNumber=1 scan=23528	49.5909
30305:4	1	S.M[+15.995]PLPPHPGHPGYINFS[+79.966]YEVLTPLKW[+31.990]YQSMIRHPYP.S		M[+16], S[+80], W[+32]	1073.52	4	4291.06	4291.03	0	5.2	17	Non	985.14	985.14	14.32	16.18	1304	>sp|P02817|AMELX_BOVIN Amelogenin, X isoform OS=Bos taurus OX=9913 GN=AMELX PE=1 SV=2	1	hf1_10472_ebo_24_1_261219.ScanId;v=1;d1=22703.22703.4	controllerType=0 controllerNumber=1 scan=22703	48.137
33364:4	1	S.M[+15.995]PLPPHPGHPGYINFS[+79.966]YEVLTPLKWY[+15.995]QSMIRHPYP.S		M[+16], S[+80], Y[+16]	1069.77	4	4276.05	4275.04	1	2.3	17	Non	1056.28	1056.28	3.25	17.93	1304	>sp|P02817|AMELX_BOVIN Amelogenin, X isoform OS=Bos taurus OX=9913 GN=AMELX PE=1 SV=2	1	hf1_10472_ebo_24_1_261219.ScanId;v=1;d1=24745.24745.4	controllerType=0 controllerNumber=1 scan=24745	51.7756
32230:4	1	S.M[+15.995]PLPPHPGHPGYINFS[+79.966]YEVLTPLKWYQSM[+15.995]IRHPYP.S		M[+16]*2, S[+80]	1069.52	4	4275.07	4275.04	0	6.5	17	Non	1067.84	1067.84	0	18.42	1304	>sp|P02817|AMELX_BOVIN Amelogenin, X isoform OS=Bos taurus OX=9913 GN=AMELX PE=1 SV=2	1	hf1_10472_ebo_24_1_261219.ScanId;v=1;d1=23972.23972.4	controllerType=0 controllerNumber=1 scan=23972	50.3924
47252:4	1	S.M[+15.995]PLPPHPGHPGYINFS[+79.966]YEVLTPLKWYQSM[+15.995]IRHPYP.S		M[+16]*2, S[+80]	1069.52	4	4275.07	4275.04	0	8.3	17	Non	1076.59	1076.59	0	17.84	1304	>sp|P02817|AMELX_BOVIN Amelogenin, X isoform OS=Bos taurus OX=9913 GN=AMELX PE=1 SV=2	1	hf1_10472_ebo_24_1_261219.ScanId;v=1;d1=34811.34811.4	controllerType=0 controllerNumber=1 scan=34811	73.6559
32814:4	1	S.M[+15.995]PLPPHPGHPGYINFS[+79.966]YEVLTPLKWYQSM[+15.995]IRHPYP.S		M[+16]*2, S[+80]	1069.77	4	4276.05	4275.04	1	1	17	Non	1082.15	1082.15	0	17.59	1304	>sp|P02817|AMELX_BOVIN Amelogenin, X isoform OS=Bos taurus OX=9913 GN=AMELX PE=1 SV=2	1	hf1_10472_ebo_24_1_261219.ScanId;v=1;d1=24362.24362.4	controllerType=0 controllerNumber=1 scan=24362	51.0828
31656:4	1	S.M[+15.995]PLPPHPGHPGYINFS[+79.966]YEVLTPLKWYQSM[+15.995]IRHPYP.S		M[+16]*2, S[+80]	1069.52	4	4275.06	4275.04	0	4.7	17	Non	1154.48	1154.48	0	20.18	1304	>sp|P02817|AMELX_BOVIN Amelogenin, X isoform OS=Bos taurus OX=9913 GN=AMELX PE=1 SV=2	1	hf1_10472_ebo_24_1_261219.ScanId;v=1;d1=23588.23588.4	controllerType=0 controllerNumber=1 scan=23588	49.6996
31935:4	1	S.M[+15.995]PLPPHPGHPGYINFS[+79.966]YEVLTPLKWYQSM[+15.995]IRHPYP.S		M[+16]*2, S[+80]	1069.52	4	4275.06	4275.04	0	5.2	17	Non	1166.5	1166.5	0	20.18	1304	>sp|P02817|AMELX_BOVIN Amelogenin, X isoform OS=Bos taurus OX=9913 GN=AMELX PE=1 SV=2	1	hf1_10472_ebo_24_1_261219.ScanId;v=1;d1=23775.23775.4	controllerType=0 controllerNumber=1 scan=23775	50.0383
29328:6	1	S.MP[+15.995]LPPHPGHPGYINFS[+79.966]YEVLTP[+15.995]LKW[+31.990]YQSMIRHPYP.S		P[+16]*2, S[+80], W[+32]	718.681	6	4307.05	4307.03	0	5.5	17	Non	6.03	6.03	0	1.29	1304	>sp|P02817|AMELX_BOVIN Amelogenin, X isoform OS=Bos taurus OX=9913 GN=AMELX PE=1 SV=2	1	hf1_10472_ebo_24_1_261219.ScanId;v=1;d1=22074.22074.6	controllerType=0 controllerNumber=1 scan=22074	47.0237
29599:5	1	S.M[+15.995]PLPPHPGHPGYINFS[+79.966]YEVLTPLKW[+31.990]YQSM[+15.995]IRHPYP.S		M[+16]*2, S[+80], W[+32]	862.217	5	4307.06	4307.03	0	6.2	17	Non	56.05	56.05	0	2.21	1304	>sp|P02817|AMELX_BOVIN Amelogenin, X isoform OS=Bos taurus OX=9913 GN=AMELX PE=1 SV=2	1	hf1_10472_ebo_24_1_261219.ScanId;v=1;d1=22250.22250.4	controllerType=0 controllerNumber=1 scan=22250	47.3323
28011:5	1	S.MP[+15.995]LPPHPGHPGYINF[+15.995]S[+79.966]YEVLTPLKWY[+31.990]QSMIRHPYP.S		F[+16], P[+16], S[+80], Y[+32]	862.218	5	4307.06	4307.03	0	7.1	17	Non	57.96	57.96	0	2.43	1304	>sp|P02817|AMELX_BOVIN Amelogenin, X isoform OS=Bos taurus OX=9913 GN=AMELX PE=1 SV=2	1	hf1_10472_ebo_24_1_261219.ScanId;v=1;d1=21196.21196.5	controllerType=0 controllerNumber=1 scan=21196	45.4764
34130:6	1	S.MP[+15.995]LPPHPGHPGYINF[+31.990]SY[+31.990]EVLTPLKW[+15.995]YQSMIRHPYP.S		F[+32], P[+16], W[+16], Y[+32]	710.848	6	4260.05	4259.05	1	-0.7	17	Non	67.05	67.05	0.25	2.18	1304	>sp|P02817|AMELX_BOVIN Amelogenin, X isoform OS=Bos taurus OX=9913 GN=AMELX PE=1 SV=2	1	hf1_10472_ebo_24_1_261219.ScanId;v=1;d1=25258.25258.6	controllerType=0 controllerNumber=1 scan=25258	52.7102
34321:4	1	S.MP[+15.995]LPPHPGHPGYINF[+31.990]S[+79.966]YEVLTPLKW[+15.995]YQSMIRHPYP.S		F[+32], P[+16], S[+80], W[+16]	1077.76	4	4308.02	4307.03	1	-1.6	17	Non	83.22	83.22	0	1.57	1304	>sp|P02817|AMELX_BOVIN Amelogenin, X isoform OS=Bos taurus OX=9913 GN=AMELX PE=1 SV=2	1	hf1_10472_ebo_24_1_261219.ScanId;v=1;d1=25386.25386.4	controllerType=0 controllerNumber=1 scan=25386	52.9389
31245:4	1	S.M[+15.995]PLPPHPGHPGYINFS[+79.966]YEVLTP[+15.995]LKWYQSM[+31.990]IRHPYP.S		M[+16][+32], P[+16], S[+80]	1077.77	4	4308.04	4307.03	1	2.7	17	Non	116.34	116.34	2.74	2.21	1304	>sp|P02817|AMELX_BOVIN Amelogenin, X isoform OS=Bos taurus OX=9913 GN=AMELX PE=1 SV=2	1	hf1_10472_ebo_24_1_261219.ScanId;v=1;d1=23318.23318.4	controllerType=0 controllerNumber=1 scan=23318	49.2235
36401:5	1	S.MP[+15.995]LPPHPGHPGYINFSYEVLTP[+31.990]LK[+15.995]W[+31.990]YQSMIRHPYP.S		K[+16], P[+16][+32], W[+32]	852.618	5	4259.06	4259.05	0	2	17	Non	152.55	152.55	1.97	2.52	1304	>sp|P02817|AMELX_BOVIN Amelogenin, X isoform OS=Bos taurus OX=9913 GN=AMELX PE=1 SV=2	1	hf1_10472_ebo_24_1_261219.ScanId;v=1;d1=26760.26760.6	controllerType=0 controllerNumber=1 scan=26760	55.4357
31545:5	1	S.MP[+15.995]LPPHPGHPGYINF[+31.990]SY[+31.990]EVLTPLKWY[+15.995]QSMIRHPYP.S		F[+32], P[+16], Y[+16][+32]	852.413	5	4258.04	4259.05	-1	-2.9	17	Non	155.66	48.94	0	1.51	1304	>sp|P02817|AMELX_BOVIN Amelogenin, X isoform OS=Bos taurus OX=9913 GN=AMELX PE=1 SV=2	1	hf1_10472_ebo_24_1_261219.ScanId;v=1;d1=23514.23514.5	controllerType=0 controllerNumber=1 scan=23514	49.5669
34673:5	1	S.M[+15.995]PLPPHPGHPGYINFSYEVLTP[+31.990]LKWY[+31.990]QSMIRH[+15.995]PYP.S		H[+16], M[+16], P[+32], Y[+32]	852.417	5	4258.05	4259.05	-1	1.3	17	Non	160.07	160.07	0	2.28	1304	>sp|P02817|AMELX_BOVIN Amelogenin, X isoform OS=Bos taurus OX=9913 GN=AMELX PE=1 SV=2	1	hf1_10472_ebo_24_1_261219.ScanId;v=1;d1=25625.25625.6	controllerType=0 controllerNumber=1 scan=25625	53.3709
29769:5	1	S.MP[+15.995]LPPHPGHPGYINFS[+79.966]Y[+15.995]EVLTPLKWY[+31.990]QSMIRHPYP.S		P[+16], S[+80], Y[+16][+32]	862.218	5	4307.06	4307.03	0	7.1	17	Non	204.55	204.55	4	4.31	1304	>sp|P02817|AMELX_BOVIN Amelogenin, X isoform OS=Bos taurus OX=9913 GN=AMELX PE=1 SV=2	1	hf1_10472_ebo_24_1_261219.ScanId;v=1;d1=22359.22359.5	controllerType=0 controllerNumber=1 scan=22359	47.5254
34022:4	1	S.MP[+15.995]LPPHPGHP[+31.990]GYINF[+31.990]SYEVLTPLKWYQSM[+15.995]IRHPYP.S		F[+32], M[+16], P[+16][+32]	1065.27	4	4258.06	4259.05	-1	3.6	17	Non	212.18	212.18	1.8	3.64	1304	>sp|P02817|AMELX_BOVIN Amelogenin, X isoform OS=Bos taurus OX=9913 GN=AMELX PE=1 SV=2	1	hf1_10472_ebo_24_1_261219.ScanId;v=1;d1=25188.25188.4	controllerType=0 controllerNumber=1 scan=25188	52.5861
28920:5	1	S.M[+15.995]PLPPHPGHPGYINFS[+79.966]Y[+15.995]EVLTPLKWYQSM[+31.990]IRHPYP.S		M[+16][+32], S[+80], Y[+16]	862.218	5	4307.06	4307.03	0	7.1	17	Non	231.87	231.87	4.04	4.57	1304	>sp|P02817|AMELX_BOVIN Amelogenin, X isoform OS=Bos taurus OX=9913 GN=AMELX PE=1 SV=2	1	hf1_10472_ebo_24_1_261219.ScanId;v=1;d1=21807.21807.5	controllerType=0 controllerNumber=1 scan=21807	46.5559
35944:4	1	S.M[+15.995]PLPPHPGHPGYINF[+31.990]SY[+31.990]EVLTPLKWYQSM[+15.995]IRHPYP.S		F[+32], M[+16]*2, Y[+32]	1065.27	4	4258.06	4259.05	-1	2.4	17	Non	234.8	234.8	0	3.39	1304	>sp|P02817|AMELX_BOVIN Amelogenin, X isoform OS=Bos taurus OX=9913 GN=AMELX PE=1 SV=2	1	hf1_10472_ebo_24_1_261219.ScanId;v=1;d1=26469.26469.4	controllerType=0 controllerNumber=1 scan=26469	54.915
33189:6	1	S.MP[+15.995]LPPHPGHPGYINF[+31.990]SY[+31.990]EVLTPLKW[+15.995]YQSMIRHPYP.S		F[+32], P[+16], W[+16], Y[+32]	710.682	6	4259.06	4259.05	0	1	17	Non	236	236	0.1	3.79	1304	>sp|P02817|AMELX_BOVIN Amelogenin, X isoform OS=Bos taurus OX=9913 GN=AMELX PE=1 SV=2	1	hf1_10472_ebo_24_1_261219.ScanId;v=1;d1=24620.24620.6	controllerType=0 controllerNumber=1 scan=24620	51.5463
33936:4	1	S.M[+15.995]PLPPHPGHPGYIN[+0.984]FS[+79.966]YEVLTPLKW[+31.990]YQSMIRHPYP.S		M[+16], N[+1], S[+80], W[+32]	1074.02	4	4293.05	4292.02	1	6.9	17	Non	236.64	236.64	0.06	3.31	1304	>sp|P02817|AMELX_BOVIN Amelogenin, X isoform OS=Bos taurus OX=9913 GN=AMELX PE=1 SV=2	1	hf1_10472_ebo_24_1_261219.ScanId;v=1;d1=25126.25126.4	controllerType=0 controllerNumber=1 scan=25126	52.4661
35427:5	1	S.M[+15.995]PLPPHPGHPGYINF[+31.990]SY[+31.990]EVLTPLK[+15.995]WYQSMIRHPYP.S		F[+32], K[+16], M[+16], Y[+32]	852.415	5	4258.05	4259.05	-1	-0.7	17	Non	250.48	250.48	0	4.6	1304	>sp|P02817|AMELX_BOVIN Amelogenin, X isoform OS=Bos taurus OX=9913 GN=AMELX PE=1 SV=2	1	hf1_10472_ebo_24_1_261219.ScanId;v=1;d1=26133.26133.6	controllerType=0 controllerNumber=1 scan=26133	54.3153
29006:4	1	S.M[+15.995]PLPPHPGHPGYINFS[+79.966]YEVLTPLKW[+31.990]YQSM[+15.995]IRHPYP.S		M[+16]*2, S[+80], W[+32]	1077.52	4	4307.07	4307.03	0	9	17	Non	321.54	321.54	0	5.16	1304	>sp|P02817|AMELX_BOVIN Amelogenin, X isoform OS=Bos taurus OX=9913 GN=AMELX PE=1 SV=2	1	hf1_10472_ebo_24_1_261219.ScanId;v=1;d1=21864.21864.4	controllerType=0 controllerNumber=1 scan=21864	46.656
34352:5	1	S.M[+15.995]PLPPHPGHPGYINF[+31.990]SY[+31.990]EVLTPLKWYQSM[+15.995]IRHPYP.S		F[+32], M[+16]*2, Y[+32]	852.817	5	4260.06	4259.05	1	0.4	17	Non	338.11	338.11	10.03	5.21	1304	>sp|P02817|AMELX_BOVIN Amelogenin, X isoform OS=Bos taurus OX=9913 GN=AMELX PE=1 SV=2	1	hf1_10472_ebo_24_1_261219.ScanId;v=1;d1=25406.25406.5	controllerType=0 controllerNumber=1 scan=25406	52.9746
47246:5	1	S.M[+15.995]PLPPHPGHPGYINF[+31.990]SY[+31.990]EVLTPLKWY[+15.995]QSMIRHPYP.S		F[+32], M[+16], Y[+16][+32]	852.419	5	4258.06	4259.05	-1	3.6	17	Non	348.11	348.11	3.91	5.55	1304	>sp|P02817|AMELX_BOVIN Amelogenin, X isoform OS=Bos taurus OX=9913 GN=AMELX PE=1 SV=2	1	hf1_10472_ebo_24_1_261219.ScanId;v=1;d1=34807.34807.5	controllerType=0 controllerNumber=1 scan=34807	73.6498
29217:5	1	S.M[+15.995]PLPPHPGHPGYINFS[+79.966]YEVLTPLKW[+31.990]YQSM[+15.995]IRHPYP.S		M[+16]*2, S[+80], W[+32]	862.217	5	4307.05	4307.03	0	6	17	Non	489.58	489.58	0	7.12	1304	>sp|P02817|AMELX_BOVIN Amelogenin, X isoform OS=Bos taurus OX=9913 GN=AMELX PE=1 SV=2	1	hf1_10472_ebo_24_1_261219.ScanId;v=1;d1=22002.22002.5	controllerType=0 controllerNumber=1 scan=22002	46.8984
33158:4	1	S.MP[+15.995]LPPHPGHPGY[+31.990]INF[+31.990]SYEVLTPLKWYQSM[+15.995]IRHPYP.S		F[+32], M[+16], P[+16], Y[+32]	1065.52	4	4259.07	4259.05	0	4.4	17	Non	618.76	618.76	1.8	8.73	1304	>sp|P02817|AMELX_BOVIN Amelogenin, X isoform OS=Bos taurus OX=9913 GN=AMELX PE=1 SV=2	1	hf1_10472_ebo_24_1_261219.ScanId;v=1;d1=24601.24601.4	controllerType=0 controllerNumber=1 scan=24601	51.515
31250:4	1	S.M[+15.995]PLPPHPGHPGYINFS[+79.966]YEVLTPLKW[+31.990]YQ[+0.984]SMIRHPYP.S		M[+16], Q[+1], S[+80], W[+32]	1073.52	4	4291.05	4292.02	-1	8.4	17	Non	692.85	692.85	0	9.39	1304	>sp|P02817|AMELX_BOVIN Amelogenin, X isoform OS=Bos taurus OX=9913 GN=AMELX PE=1 SV=2	1	hf1_10472_ebo_24_1_261219.ScanId;v=1;d1=23322.23322.4	controllerType=0 controllerNumber=1 scan=23322	49.2323
33210:5	1	S.M[+15.995]PLPPHPGHPGYINFS[+79.966]YEVLTPLKWYQSMIR[+0.984]HPYPS.Y		M[+16], R[+1], S[+80]	870.225	5	4347.1	4347.06	0	8.4	17	Non	116.37	116.37	2.85	2.28	1304	>sp|P02817|AMELX_BOVIN Amelogenin, X isoform OS=Bos taurus OX=9913 GN=AMELX PE=1 SV=2	1	hf1_10472_ebo_24_1_261219.ScanId;v=1;d1=24632.24632.5	controllerType=0 controllerNumber=1 scan=24632	51.5672
34064:5	1	S.M[+15.995]PLPPHPGHPGYINFSYEVLTPLKW[+31.990]YQSM[+31.990]IRHPYPS.Y		M[+16][+32], W[+32]	866.822	5	4330.08	4330.09	0	-1.8	17	Non	139.96	139.96	0	2.25	1304	>sp|P02817|AMELX_BOVIN Amelogenin, X isoform OS=Bos taurus OX=9913 GN=AMELX PE=1 SV=2	1	hf1_10472_ebo_24_1_261219.ScanId;v=1;d1=25217.25217.5	controllerType=0 controllerNumber=1 scan=25217	52.6379
32359:5	1	S.MP[+15.995]LPPHPGHPGYINFS[+79.966]YEVLTPLKWYQSMIRH[+15.995]PYPS.Y		H[+16], P[+16], S[+80]	873.221	5	4362.08	4362.07	0	1.1	17	Non	167.58	167.58	0.38	3.3	1304	>sp|P02817|AMELX_BOVIN Amelogenin, X isoform OS=Bos taurus OX=9913 GN=AMELX PE=1 SV=2	1	hf1_10472_ebo_24_1_261219.ScanId;v=1;d1=24056.24056.5	controllerType=0 controllerNumber=1 scan=24056	50.5402
37246:4	1	S.M[+15.995]PLPPHPGHPGYINF[+31.990]SY[+31.990]EVLTPLKWYQSMIRHPYPS.Y		F[+32], M[+16], Y[+32]	1083.27	4	4330.06	4330.09	0	-7	17	Non	230.8	230.8	3.03	2.41	1304	>sp|P02817|AMELX_BOVIN Amelogenin, X isoform OS=Bos taurus OX=9913 GN=AMELX PE=1 SV=2	1	hf1_10472_ebo_24_1_261219.ScanId;v=1;d1=27311.27311.4	controllerType=0 controllerNumber=1 scan=27311	56.4316
31470:4	1	S.M[+15.995]PLPPHPGHPGYINFS[+79.966]YEVLTPLKWYQSM[+15.995]IRHPYPS.Y		M[+16]*2, S[+80]	1091.28	4	4362.09	4362.07	0	4.4	17	Non	260.89	260.89	0	4.89	1304	>sp|P02817|AMELX_BOVIN Amelogenin, X isoform OS=Bos taurus OX=9913 GN=AMELX PE=1 SV=2	1	hf1_10472_ebo_24_1_261219.ScanId;v=1;d1=23463.23463.3	controllerType=0 controllerNumber=1 scan=23463	49.477
36942:4	1	S.M[+15.995]PLPPHPGHPGYINFSYEVLTP[+31.990]LKWY[+31.990]QSMIRHPYPS.Y		M[+16], P[+32], Y[+32]	1083.27	4	4330.05	4330.09	0	-9.7	17	Non	270.98	270.98	0	3.29	1304	>sp|P02817|AMELX_BOVIN Amelogenin, X isoform OS=Bos taurus OX=9913 GN=AMELX PE=1 SV=2	1	hf1_10472_ebo_24_1_261219.ScanId;v=1;d1=27112.27112.4	controllerType=0 controllerNumber=1 scan=27112	56.074
31411:5	1	S.M[+15.995]PLPPHPGHPGYINFS[+79.966]YEVLTPLKWYQSM[+15.995]IRHPYPS.Y		M[+16]*2, S[+80]	873.224	5	4362.09	4362.07	0	5	17	Non	637.88	637.88	0	9.63	1304	>sp|P02817|AMELX_BOVIN Amelogenin, X isoform OS=Bos taurus OX=9913 GN=AMELX PE=1 SV=2	1	hf1_10472_ebo_24_1_261219.ScanId;v=1;d1=23425.23425.5	controllerType=0 controllerNumber=1 scan=23425	49.4115
34658:5	1	S.M[+15.995]PLPPHPGHPGYINFSYEVLTPLKWYQSMIR[+0.984]HP[+31.990]Y[+31.990]PS.Y		M[+16], P[+32], R[+1], Y[+32]	867.021	5	4331.08	4331.07	0	0.6	17	Non	86.07	86.07	0.68	1.3	1304	>sp|P02817|AMELX_BOVIN Amelogenin, X isoform OS=Bos taurus OX=9913 GN=AMELX PE=1 SV=2	1	hf1_10472_ebo_24_1_261219.ScanId;v=1;d1=25613.25613.5	controllerType=0 controllerNumber=1 scan=25613	53.3471
37601:4	1	S.M[+15.995]PLPPHPGHPGYIN[+0.984]FSY[+31.990]EVLTP[+31.990]LKWYQSMIRHPYPS.Y		M[+16], N[+1], P[+32], Y[+32]	1083.28	4	4330.08	4331.07	-1	2.3	17	Non	239	239	1.41	2.88	1304	>sp|P02817|AMELX_BOVIN Amelogenin, X isoform OS=Bos taurus OX=9913 GN=AMELX PE=1 SV=2	1	hf1_10472_ebo_24_1_261219.ScanId;v=1;d1=27541.27541.5	controllerType=0 controllerNumber=1 scan=27541	56.8496
30800:6	1	S.MP[+15.995]LPPHPGHPGYINFS[+79.966]YEVLTPLKW[+31.990]YQSM[+15.995]IRHPYPS.Y		M[+16], P[+16], S[+80], W[+32]	733.182	6	4394.06	4394.06	0	-0.5	17	Non	265.23	265.23	0	4.49	1304	>sp|P02817|AMELX_BOVIN Amelogenin, X isoform OS=Bos taurus OX=9913 GN=AMELX PE=1 SV=2	1	hf1_10472_ebo_24_1_261219.ScanId;v=1;d1=23029.23029.6	controllerType=0 controllerNumber=1 scan=23029	48.7143
30900:5	1	S.MP[+15.995]LPPHPGHPGYINFS[+79.966]YEVLTPLKWYQSM[+15.995]IRHPY[+31.990]PS.Y		M[+16], P[+16], S[+80], Y[+32]	879.619	5	4394.07	4394.06	0	1.7	17	Non	350.58	350.58	0	5.2	1304	>sp|P02817|AMELX_BOVIN Amelogenin, X isoform OS=Bos taurus OX=9913 GN=AMELX PE=1 SV=2	1	hf1_10472_ebo_24_1_261219.ScanId;v=1;d1=23094.23094.5	controllerType=0 controllerNumber=1 scan=23094	48.8289
32921:6	1	S.M[+15.995]PLPPHPGHPGYINFSYEVLTPLKWYQSMIRHPYPSY.G		M[+16]	738.867	6	4428.17	4429.17	-1	-0.9	17	Non	86.33	86.33	6.99	2.2	1304	>sp|P02817|AMELX_BOVIN Amelogenin, X isoform OS=Bos taurus OX=9913 GN=AMELX PE=1 SV=2	1	hf1_10472_ebo_24_1_261219.ScanId;v=1;d1=24438.24438.6	controllerType=0 controllerNumber=1 scan=24438	51.2173
33215:6	1	S.MP[+15.995]LPPHPGHPGYINFSYEVLTPLKWYQSMIRHPYPSY.G		P[+16]	739.034	6	4429.17	4429.17	0	-1.6	17	Non	181.84	181.84	4	3.07	1304	>sp|P02817|AMELX_BOVIN Amelogenin, X isoform OS=Bos taurus OX=9913 GN=AMELX PE=1 SV=2	1	hf1_10472_ebo_24_1_261219.ScanId;v=1;d1=24636.24636.6	controllerType=0 controllerNumber=1 scan=24636	51.5759
31848:6	1	S.M[+15.995]PLPPHPGHPGYINFSYEVLTPLKWYQSMIRHPYPSY.G		M[+16]	738.868	6	4428.17	4429.17	-1	0.9	17	Non	245.97	245.97	15.11	4.79	1304	>sp|P02817|AMELX_BOVIN Amelogenin, X isoform OS=Bos taurus OX=9913 GN=AMELX PE=1 SV=2	1	hf1_10472_ebo_24_1_261219.ScanId;v=1;d1=23719.23719.6	controllerType=0 controllerNumber=1 scan=23719	49.9349
36176:4	1	S.M[+15.995]PLPPHPGHPGYINFS[+79.966]YEVLTPLKWYQSMIRHPYPSY.G		M[+16], S[+80]	1127.8	4	4508.16	4509.14	-1	5.3	17	Non	92.09	92.09	29.06	2.26	1304	>sp|P02817|AMELX_BOVIN Amelogenin, X isoform OS=Bos taurus OX=9913 GN=AMELX PE=1 SV=2	1	hf1_10472_ebo_24_1_261219.ScanId;v=1;d1=26614.26614.5	controllerType=0 controllerNumber=1 scan=26614	55.1724
33014:6	1	S.MPLPPHPGHPGYINFS[+79.966]YEVLTPLK[+15.995]WYQSMIRHPYPSY.G		K[+16], S[+80]	752.199	6	4508.16	4509.14	-1	5.5	17	Non	131.39	131.39	0	2.46	1304	>sp|P02817|AMELX_BOVIN Amelogenin, X isoform OS=Bos taurus OX=9913 GN=AMELX PE=1 SV=2	1	hf1_10472_ebo_24_1_261219.ScanId;v=1;d1=24502.24502.6	controllerType=0 controllerNumber=1 scan=24502	51.3334
34516:5	1	S.MPLPPHPGHPGYINFS[+79.966]YEVLTPLKWYQSMIRH[+15.995]PYPSY.G		H[+16], S[+80]	902.835	5	4510.15	4509.14	1	1.2	17	Non	195.45	195.45	13.92	3.3	1304	>sp|P02817|AMELX_BOVIN Amelogenin, X isoform OS=Bos taurus OX=9913 GN=AMELX PE=1 SV=2	1	hf1_10472_ebo_24_1_261219.ScanId;v=1;d1=25515.25515.6	controllerType=0 controllerNumber=1 scan=25515	53.1684
36121:5	1	S.M[+15.995]PLPPHPGHPGYINFS[+79.966]YEVLTPLKWYQSMIRHPYPSY.G		M[+16], S[+80]	902.434	5	4508.14	4509.14	-1	1.6	17	Non	270.21	270.21	5.51	4.74	1304	>sp|P02817|AMELX_BOVIN Amelogenin, X isoform OS=Bos taurus OX=9913 GN=AMELX PE=1 SV=2	1	hf1_10472_ebo_24_1_261219.ScanId;v=1;d1=26580.26580.5	controllerType=0 controllerNumber=1 scan=26580	55.1122
36422:5	1	S.MP[+15.995]LPPHPGHPGYINFS[+79.966]YEVLTPLKWYQSMIRHPYPSY.G		P[+16], S[+80]	902.638	5	4509.16	4509.14	0	4.7	17	Non	438.16	438.16	4	7.06	1304	>sp|P02817|AMELX_BOVIN Amelogenin, X isoform OS=Bos taurus OX=9913 GN=AMELX PE=1 SV=2	1	hf1_10472_ebo_24_1_261219.ScanId;v=1;d1=26774.26774.5	controllerType=0 controllerNumber=1 scan=26774	55.4626
30763:6	1	S.MP[+15.995]LPPHPGHPGYINFSYEVLTPLKWYQSM[+15.995]IRHPYPSY.G		M[+16], P[+16]	741.704	6	4445.19	4445.17	0	5	17	Non	598.07	598.07	12.08	8.51	1304	>sp|P02817|AMELX_BOVIN Amelogenin, X isoform OS=Bos taurus OX=9913 GN=AMELX PE=1 SV=2	1	hf1_10472_ebo_24_1_261219.ScanId;v=1;d1=23006.23006.6	controllerType=0 controllerNumber=1 scan=23006	48.6741
33193:5	1	S.MPLPPHPGHPGYINFS[+79.966]YEVLTPLKWY[+15.995]QSMIRHPYPSY.G		S[+80], Y[+16]	902.639	5	4509.17	4509.14	0	6	17	Non	619.63	619.63	1.5	9.63	1304	>sp|P02817|AMELX_BOVIN Amelogenin, X isoform OS=Bos taurus OX=9913 GN=AMELX PE=1 SV=2	1	hf1_10472_ebo_24_1_261219.ScanId;v=1;d1=24623.24623.5	controllerType=0 controllerNumber=1 scan=24623	51.5536
30025:5	1	S.MP[+15.995]LPPHPGHPGYINFS[+79.966]YEVLTPLKW[+31.990]YQSMIRHPYPSY.G		P[+16], S[+80], W[+32]	909.036	5	4541.15	4541.13	0	4.5	17	Non	36.17	36.17	0	1.38	1304	>sp|P02817|AMELX_BOVIN Amelogenin, X isoform OS=Bos taurus OX=9913 GN=AMELX PE=1 SV=2	1	hf1_10472_ebo_24_1_261219.ScanId;v=1;d1=22523.22523.5	controllerType=0 controllerNumber=1 scan=22523	47.8196
30318:6	1	S.MP[+15.995]LPPHPGHPGYINFS[+79.966]YEVLTPLKWY[+31.990]QSMIRHPYPSY.G		P[+16], S[+80], Y[+32]	757.698	6	4541.15	4541.13	0	4.5	17	Non	53.9	53.9	0	1.75	1304	>sp|P02817|AMELX_BOVIN Amelogenin, X isoform OS=Bos taurus OX=9913 GN=AMELX PE=1 SV=2	1	hf1_10472_ebo_24_1_261219.ScanId;v=1;d1=22712.22712.6	controllerType=0 controllerNumber=1 scan=22712	48.1505
47194:6	1	S.MP[+15.995]LPPHPGHPGYINFSYEVLTPLKW[+15.995]Y[+31.990]QSMIRHPYPSY.G		P[+16], W[+16], Y[+32]	747.036	6	4477.18	4477.16	0	4.8	17	Non	70.23	70.23	0	2.3	1304	>sp|P02817|AMELX_BOVIN Amelogenin, X isoform OS=Bos taurus OX=9913 GN=AMELX PE=1 SV=2	1	hf1_10472_ebo_24_1_261219.ScanId;v=1;d1=34767.34767.4	controllerType=0 controllerNumber=1 scan=34767	73.5776
30611:6	1	S.MP[+15.995]LPPHPGHPGYINFS[+79.966]YEVLTPLKWY[+31.990]QSMIRHPYPSY.G		P[+16], S[+80], Y[+32]	757.698	6	4541.15	4541.13	0	4.8	17	Non	118.56	118.56	0	2.35	1304	>sp|P02817|AMELX_BOVIN Amelogenin, X isoform OS=Bos taurus OX=9913 GN=AMELX PE=1 SV=2	1	hf1_10472_ebo_24_1_261219.ScanId;v=1;d1=22905.22905.6	controllerType=0 controllerNumber=1 scan=22905	48.4922
37116:5	1	S.MP[+15.995]LPPHPGHPGYINF[+31.990]SY[+31.990]EVLTPLKWYQSMIRHPYPSY.G		F[+32], P[+16], Y[+32]	899.441	5	4493.18	4493.15	0	5.6	17	Non	122.43	122.43	0.4	2.94	1304	>sp|P02817|AMELX_BOVIN Amelogenin, X isoform OS=Bos taurus OX=9913 GN=AMELX PE=1 SV=2	1	hf1_10472_ebo_24_1_261219.ScanId;v=1;d1=27227.27227.5	controllerType=0 controllerNumber=1 scan=27227	56.2814
33340:6	1	S.MP[+15.995]LPPHPGHPGYINFS[+79.966]YEVLTPLK[+15.995]WYQSMIRHPYPSY.G		K[+16], P[+16], S[+80]	755.03	6	4525.14	4525.13	0	1.6	17	Non	129.49	129.49	0	2.46	1304	>sp|P02817|AMELX_BOVIN Amelogenin, X isoform OS=Bos taurus OX=9913 GN=AMELX PE=1 SV=2	1	hf1_10472_ebo_24_1_261219.ScanId;v=1;d1=24730.24730.6	controllerType=0 controllerNumber=1 scan=24730	51.7474
32636:5	1	S.M[+15.995]PLPPHPGHPGYINFS[+79.966]YEVLTPLKW[+31.990]YQSMIRHPYPSY.G		M[+16], S[+80], W[+32]	909.034	5	4541.14	4541.13	0	2.7	17	Non	155.29	155.29	0	2.2	1304	>sp|P02817|AMELX_BOVIN Amelogenin, X isoform OS=Bos taurus OX=9913 GN=AMELX PE=1 SV=2	1	hf1_10472_ebo_24_1_261219.ScanId;v=1;d1=24235.24235.5	controllerType=0 controllerNumber=1 scan=24235	50.8523
28653:5	1	S.MP[+15.995]LPPHPGHPGYINFS[+79.966]YEVLTPLKW[+31.990]YQSMIRHPYPSY.G		P[+16], S[+80], W[+32]	909.037	5	4541.16	4541.13	0	6.5	17	Non	202.52	202.52	0	4.57	1304	>sp|P02817|AMELX_BOVIN Amelogenin, X isoform OS=Bos taurus OX=9913 GN=AMELX PE=1 SV=2	1	hf1_10472_ebo_24_1_261219.ScanId;v=1;d1=21633.21633.5	controllerType=0 controllerNumber=1 scan=21633	46.249
31184:5	1	S.MP[+15.995]LPPHPGHPGYINFS[+79.966]YEVLTPLKWYQSM[+15.995]IRHPYPSY.G		M[+16], P[+16], S[+80]	905.624	5	4524.09	4525.13	-1	-8.3	17	Non	247.15	247.15	0.1	3.72	1304	>sp|P02817|AMELX_BOVIN Amelogenin, X isoform OS=Bos taurus OX=9913 GN=AMELX PE=1 SV=2	1	hf1_10472_ebo_24_1_261219.ScanId;v=1;d1=23281.23281.5	controllerType=0 controllerNumber=1 scan=23281	49.1606
29414:5	1	S.MP[+15.995]LPPHPGHPGYINFS[+79.966]YEVLTPLKW[+31.990]YQSMIRHPYPSY.G		P[+16], S[+80], W[+32]	909.037	5	4541.16	4541.13	0	6.3	17	Non	250.68	250.68	0	5.57	1304	>sp|P02817|AMELX_BOVIN Amelogenin, X isoform OS=Bos taurus OX=9913 GN=AMELX PE=1 SV=2	1	hf1_10472_ebo_24_1_261219.ScanId;v=1;d1=22129.22129.5	controllerType=0 controllerNumber=1 scan=22129	47.1206
32436:4	1	S.M[+15.995]PLPPHPGHPGYINFS[+79.966]YEVLTPLKWYQSM[+15.995]IRHPYPSY.G		M[+16]*2, S[+80]	1132.05	4	4525.17	4525.13	0	7.1	17	Non	258.06	258.06	14.37	5.12	1304	>sp|P02817|AMELX_BOVIN Amelogenin, X isoform OS=Bos taurus OX=9913 GN=AMELX PE=1 SV=2	1	hf1_10472_ebo_24_1_261219.ScanId;v=1;d1=24103.24103.3	controllerType=0 controllerNumber=1 scan=24103	50.6205
37746:5	1	S.MP[+15.995]LPPHPGHPGYINFS[+79.966]YEVLTPLKWYQ[+0.984]SMIRHPYPSY.G		P[+16], Q[+1], S[+80]	902.837	5	4510.15	4510.12	0	6.8	17	Non	277.49	277.49	4	5.73	1304	>sp|P02817|AMELX_BOVIN Amelogenin, X isoform OS=Bos taurus OX=9913 GN=AMELX PE=1 SV=2	1	hf1_10472_ebo_24_1_261219.ScanId;v=1;d1=27633.27633.5	controllerType=0 controllerNumber=1 scan=27633	57.0149
31900:5	1	S.M[+15.995]PLPPHPGHPGYINFS[+79.966]YEVLTPLKWYQSM[+31.990]IRHPYPSY.G		M[+16][+32], S[+80]	909.038	5	4541.16	4541.13	0	7.2	17	Non	283.89	99.96	7.42	4.33	1304	>sp|P02817|AMELX_BOVIN Amelogenin, X isoform OS=Bos taurus OX=9913 GN=AMELX PE=1 SV=2	1	hf1_10472_ebo_24_1_261219.ScanId;v=1;d1=23752.23752.5	controllerType=0 controllerNumber=1 scan=23752	49.9925
31604:5	1	S.M[+31.990]PLPPHPGHPGYINFS[+79.966]YEVLTPLKWY[+15.995]QSMIRHPYPSY.G		M[+32], S[+80], Y[+16]	909.034	5	4541.14	4541.13	0	3	17	Non	285.38	285.38	0	5.41	1304	>sp|P02817|AMELX_BOVIN Amelogenin, X isoform OS=Bos taurus OX=9913 GN=AMELX PE=1 SV=2	1	hf1_10472_ebo_24_1_261219.ScanId;v=1;d1=23553.23553.5	controllerType=0 controllerNumber=1 scan=23553	49.6359
30991:5	1	S.MP[+15.995]LPPHPGHPGYINFS[+79.966]YEVLTPLKW[+31.990]YQSMIRHPYPSY.G		P[+16], S[+80], W[+32]	909.232	5	4542.13	4541.13	1	0.3	17	Non	291.55	291.55	0	5.23	1304	>sp|P02817|AMELX_BOVIN Amelogenin, X isoform OS=Bos taurus OX=9913 GN=AMELX PE=1 SV=2	1	hf1_10472_ebo_24_1_261219.ScanId;v=1;d1=23153.23153.5	controllerType=0 controllerNumber=1 scan=23153	48.9369
31932:6	1	S.MP[+15.995]LPPHPGHPGYINFS[+79.966]YEVLTPLKW[+15.995]YQSMIRHPYPSY.G		P[+16], S[+80], W[+16]	755.032	6	4525.15	4525.13	0	4.6	17	Non	300.98	300.98	0	5.56	1304	>sp|P02817|AMELX_BOVIN Amelogenin, X isoform OS=Bos taurus OX=9913 GN=AMELX PE=1 SV=2	1	hf1_10472_ebo_24_1_261219.ScanId;v=1;d1=23772.23772.6	controllerType=0 controllerNumber=1 scan=23772	50.031
32539:6	1	S.MP[+15.995]LPPHPGHPGYINFS[+79.966]YEVLTPLKWY[+15.995]QSMIRHPYPSY.G		P[+16], S[+80], Y[+16]	754.866	6	4524.16	4525.13	-1	6.9	17	Non	309.62	309.62	4	5.79	1304	>sp|P02817|AMELX_BOVIN Amelogenin, X isoform OS=Bos taurus OX=9913 GN=AMELX PE=1 SV=2	1	hf1_10472_ebo_24_1_261219.ScanId;v=1;d1=24170.24170.6	controllerType=0 controllerNumber=1 scan=24170	50.7394
31309:5	1	S.MP[+15.995]LPPHPGHPGYINFS[+79.966]YEVLTPLKWYQSM[+31.990]IRHPYPSY.G		M[+32], P[+16], S[+80]	909.233	5	4542.14	4541.13	1	0.8	17	Non	351.63	351.63	0	5.36	1304	>sp|P02817|AMELX_BOVIN Amelogenin, X isoform OS=Bos taurus OX=9913 GN=AMELX PE=1 SV=2	1	hf1_10472_ebo_24_1_261219.ScanId;v=1;d1=23356.23356.5	controllerType=0 controllerNumber=1 scan=23356	49.2918
33607:6	1	S.MP[+15.995]LPPHPGHPGYINFS[+79.966]YEVLTPLKWY[+15.995]QSMIRHPYPSY.G		P[+16], S[+80], Y[+16]	755.197	6	4526.14	4525.13	1	1.6	17	Non	354.99	354.99	2	5.29	1304	>sp|P02817|AMELX_BOVIN Amelogenin, X isoform OS=Bos taurus OX=9913 GN=AMELX PE=1 SV=2	1	hf1_10472_ebo_24_1_261219.ScanId;v=1;d1=24917.24917.6	controllerType=0 controllerNumber=1 scan=24917	52.0972
32738:5	1	S.MP[+15.995]LPPHPGHPGYINFS[+79.966]YEVLTPLKWY[+15.995]QSMIRHPYPSY.G		P[+16], S[+80], Y[+16]	906.036	5	4526.15	4525.13	1	3.3	17	Non	356.61	356.61	0	5.7	1304	>sp|P02817|AMELX_BOVIN Amelogenin, X isoform OS=Bos taurus OX=9913 GN=AMELX PE=1 SV=2	1	hf1_10472_ebo_24_1_261219.ScanId;v=1;d1=24307.24307.6	controllerType=0 controllerNumber=1 scan=24307	50.984
30645:5	1	S.M[+15.995]PLPPHPGHPGYINFS[+79.966]YEVLTPLKWYQSM[+31.990]IRHPYPSY.G		M[+16][+32], S[+80]	909.038	5	4541.16	4541.13	0	7.3	17	Non	558	558	0	7.38	1304	>sp|P02817|AMELX_BOVIN Amelogenin, X isoform OS=Bos taurus OX=9913 GN=AMELX PE=1 SV=2	1	hf1_10472_ebo_24_1_261219.ScanId;v=1;d1=22926.22926.5	controllerType=0 controllerNumber=1 scan=22926	48.5289
32211:6	1	S.M[+15.995]PLPPHPGHPGYINFS[+79.966]YEVLTPLKWYQSM[+15.995]IRHPYPSY.G		M[+16]*2, S[+80]	755.033	6	4525.16	4525.13	0	5.9	17	Non	570.52	570.52	0	8.51	1304	>sp|P02817|AMELX_BOVIN Amelogenin, X isoform OS=Bos taurus OX=9913 GN=AMELX PE=1 SV=2	1	hf1_10472_ebo_24_1_261219.ScanId;v=1;d1=23961.23961.6	controllerType=0 controllerNumber=1 scan=23961	50.3729
33266:4	1	S.M[+15.995]PLPPHPGHPGYINFS[+79.966]YEVLTPLKWYQSM[+15.995]IRHPYPSY.G		M[+16]*2, S[+80]	1132.29	4	4526.14	4525.13	1	1.3	17	Non	578.79	578.79	5.8	7.14	1304	>sp|P02817|AMELX_BOVIN Amelogenin, X isoform OS=Bos taurus OX=9913 GN=AMELX PE=1 SV=2	1	hf1_10472_ebo_24_1_261219.ScanId;v=1;d1=24676.24676.3	controllerType=0 controllerNumber=1 scan=24676	51.6515
30338:5	1	S.M[+15.995]PLPPHPGHPGYINFS[+79.966]YEVLTPLKWY[+31.990]QSMIRHPYPSY.G		M[+16], S[+80], Y[+32]	909.037	5	4541.16	4541.13	0	6.1	17	Non	605.3	605.3	0	8.95	1304	>sp|P02817|AMELX_BOVIN Amelogenin, X isoform OS=Bos taurus OX=9913 GN=AMELX PE=1 SV=2	1	hf1_10472_ebo_24_1_261219.ScanId;v=1;d1=22725.22725.5	controllerType=0 controllerNumber=1 scan=22725	48.1756
31914:5	1	S.M[+15.995]PLPPHPGHPGYINFS[+79.966]YEVLTPLKWYQSM[+15.995]IRHPYPSY.G		M[+16]*2, S[+80]	905.836	5	4525.15	4525.13	0	3.9	17	Non	613.69	613.69	0	8.93	1304	>sp|P02817|AMELX_BOVIN Amelogenin, X isoform OS=Bos taurus OX=9913 GN=AMELX PE=1 SV=2	1	hf1_10472_ebo_24_1_261219.ScanId;v=1;d1=23760.23760.5	controllerType=0 controllerNumber=1 scan=23760	50.0074
29726:5	1	S.M[+15.995]PLPPHPGHPGYINFS[+79.966]YEVLTPLKWY[+31.990]QSMIRHPYPSY.G		M[+16], S[+80], Y[+32]	909.038	5	4541.16	4541.13	0	7.5	17	Non	670.22	670.22	0	10.87	1304	>sp|P02817|AMELX_BOVIN Amelogenin, X isoform OS=Bos taurus OX=9913 GN=AMELX PE=1 SV=2	1	hf1_10472_ebo_24_1_261219.ScanId;v=1;d1=22331.22331.5	controllerType=0 controllerNumber=1 scan=22331	47.4766
33031:5	1	S.M[+15.995]PLPPHPGHPGYINFS[+79.966]YEVLTPLKWY[+15.995]QSMIRHPYPSY.G		M[+16], S[+80], Y[+16]	906.035	5	4526.14	4525.13	1	1.7	17	Non	733.5	733.5	1.5	11.04	1304	>sp|P02817|AMELX_BOVIN Amelogenin, X isoform OS=Bos taurus OX=9913 GN=AMELX PE=1 SV=2	1	hf1_10472_ebo_24_1_261219.ScanId;v=1;d1=24514.24514.5	controllerType=0 controllerNumber=1 scan=24514	51.357
47236:5	1	S.M[+15.995]PLPPHPGHPGYINFS[+79.966]YEVLTPLKWYQSM[+15.995]IRHPYPSY.G		M[+16]*2, S[+80]	905.839	5	4525.17	4525.13	0	7.2	17	Non	745.98	745.98	0	11.87	1304	>sp|P02817|AMELX_BOVIN Amelogenin, X isoform OS=Bos taurus OX=9913 GN=AMELX PE=1 SV=2	1	hf1_10472_ebo_24_1_261219.ScanId;v=1;d1=34799.34799.5	controllerType=0 controllerNumber=1 scan=34799	73.634
32500:5	1	S.M[+15.995]PLPPHPGHPGYINFS[+79.966]YEVLTPLKWY[+15.995]QSMIRHPYPSY.G		M[+16], S[+80], Y[+16]	905.838	5	4525.16	4525.13	0	5.6	17	Non	754.15	754.15	1.5	12.63	1304	>sp|P02817|AMELX_BOVIN Amelogenin, X isoform OS=Bos taurus OX=9913 GN=AMELX PE=1 SV=2	1	hf1_10472_ebo_24_1_261219.ScanId;v=1;d1=24147.24147.5	controllerType=0 controllerNumber=1 scan=24147	50.6994
33298:5	1	S.M[+15.995]PLPPHPGHPGYINFS[+79.966]YEVLTPLKWYQSM[+15.995]IRHPYPSY.G		M[+16]*2, S[+80]	906.035	5	4526.14	4525.13	1	1.6	17	Non	778.09	778.09	0	12.04	1304	>sp|P02817|AMELX_BOVIN Amelogenin, X isoform OS=Bos taurus OX=9913 GN=AMELX PE=1 SV=2	1	hf1_10472_ebo_24_1_261219.ScanId;v=1;d1=24701.24701.5	controllerType=0 controllerNumber=1 scan=24701	51.6976
32194:5	1	S.M[+15.995]PLPPHPGHPGYINFS[+79.966]YEVLTPLKWYQSM[+15.995]IRHPYPSY.G		M[+16]*2, S[+80]	905.838	5	4525.16	4525.13	0	6.2	17	Non	819.37	819.37	0	13.63	1304	>sp|P02817|AMELX_BOVIN Amelogenin, X isoform OS=Bos taurus OX=9913 GN=AMELX PE=1 SV=2	1	hf1_10472_ebo_24_1_261219.ScanId;v=1;d1=23950.23950.5	controllerType=0 controllerNumber=1 scan=23950	50.3538
33557:5	1	S.M[+15.995]PLPPHPGHPGYINFS[+79.966]YEVLTPLKWYQSM[+15.995]IRHPYPSY.G		M[+16]*2, S[+80]	906.036	5	4526.15	4525.13	1	3.1	17	Non	884.72	884.72	0	14.37	1304	>sp|P02817|AMELX_BOVIN Amelogenin, X isoform OS=Bos taurus OX=9913 GN=AMELX PE=1 SV=2	1	hf1_10472_ebo_24_1_261219.ScanId;v=1;d1=24885.24885.5	controllerType=0 controllerNumber=1 scan=24885	52.0349
33528:4	1	S.M[+15.995]PLPPHPGHPGYINFS[+79.966]YEVLTPLKWYQSM[+15.995]IRHPYPSY.G		M[+16]*2, S[+80]	1132.29	4	4526.16	4525.13	1	4.2	17	Non	920.3	920.3	11.78	15.18	1304	>sp|P02817|AMELX_BOVIN Amelogenin, X isoform OS=Bos taurus OX=9913 GN=AMELX PE=1 SV=2	1	hf1_10472_ebo_24_1_261219.ScanId;v=1;d1=24863.24863.4	controllerType=0 controllerNumber=1 scan=24863	51.9933
31977:4	1	S.M[+15.995]PLPPHPGHPGYINFS[+79.966]YEVLTPLKW[+15.995]YQSMIRHPYPSY.G		M[+16], S[+80], W[+16]	1132.05	4	4525.16	4525.13	0	5.5	17	Non	949.4	949.4	12.13	15.18	1304	>sp|P02817|AMELX_BOVIN Amelogenin, X isoform OS=Bos taurus OX=9913 GN=AMELX PE=1 SV=2	1	hf1_10472_ebo_24_1_261219.ScanId;v=1;d1=23801.23801.4	controllerType=0 controllerNumber=1 scan=23801	50.083
32266:4	1	S.M[+15.995]PLPPHPGHPGYINFS[+79.966]YEVLTPLKWYQSM[+15.995]IRHPYPSY.G		M[+16]*2, S[+80]	1132.05	4	4525.17	4525.13	0	7.5	17	Non	1008.94	1008.94	11.82	17.42	1304	>sp|P02817|AMELX_BOVIN Amelogenin, X isoform OS=Bos taurus OX=9913 GN=AMELX PE=1 SV=2	1	hf1_10472_ebo_24_1_261219.ScanId;v=1;d1=23994.23994.4	controllerType=0 controllerNumber=1 scan=23994	50.4313
37321:5	1	S.MP[+15.995]LPPHPGHP[+31.990]GYINF[+31.990]SY[+15.995]EVLTPLKWYQSMIRHPYPSY.G		F[+32], P[+16][+32], Y[+16]	902.634	5	4509.14	4509.15	0	-1.9	17	Non	49.04	49.04	0	2.19	1304	>sp|P02817|AMELX_BOVIN Amelogenin, X isoform OS=Bos taurus OX=9913 GN=AMELX PE=1 SV=2	1	hf1_10472_ebo_24_1_261219.ScanId;v=1;d1=27361.27361.5	controllerType=0 controllerNumber=1 scan=27361	56.5208
29244:5	1	S.M[+15.995]PLPPHPGHPGYINFS[+79.966]YEVLTPLKW[+31.990]Y[+15.995]QSMIRHPYPSY.G		M[+16], S[+80], W[+32], Y[+16]	912.037	5	4556.16	4557.12	-1	8.2	17	Non	122.15	122.15	0	3.15	1304	>sp|P02817|AMELX_BOVIN Amelogenin, X isoform OS=Bos taurus OX=9913 GN=AMELX PE=1 SV=2	1	hf1_10472_ebo_24_1_261219.ScanId;v=1;d1=22019.22019.5	controllerType=0 controllerNumber=1 scan=22019	46.9269
29558:5	1	S.MP[+15.995]LPPHPGHPGYINFS[+79.966]YEVLTPLK[+15.995]WY[+31.990]QSMIRHPYPSY.G		K[+16], P[+16], S[+80], Y[+32]	912.237	5	4557.16	4557.12	0	7.2	17	Non	127.27	127.27	0	3.15	1304	>sp|P02817|AMELX_BOVIN Amelogenin, X isoform OS=Bos taurus OX=9913 GN=AMELX PE=1 SV=2	1	hf1_10472_ebo_24_1_261219.ScanId;v=1;d1=22223.22223.5	controllerType=0 controllerNumber=1 scan=22223	47.2861
[truncated: 2,330 more rows]

## Sheet: Proteins
Protein Rank	Description	|Log Prob|	Best |Log Prob|	Best score	Total Intensity	# of spectra	# of unique peptides	# of mod peptides	Coverage %	# AA's in protein	Protein DB number
[truncated: 4 more rows]
