# Supplementary material for: A Peptidomics Method for Assessing Sex from Modern and Ancient Bovine Tooth Enamel.
Source: Research Square preprint supplement (doi:10.21203/rs.3.rs-3766361/v1), 2024-01-29
Supplement: Supplementary file 5 [file 59000223f77f21988221dd21.xlsx]

## Sheet: Summary
Summary:
	1) Input data file: H:\Proteomics\Projects\Boaretto\INCPM_10472\Raw_files\HF1_10472_EBO_36_1_261219.raw
	2) Protein database: H:\Proteomics\Projects\Boaretto\INCPM_18273\AMELs Cattle fasta Pau 2.Fasta
	3) Parameter file: D:\Boaretto\HF1_10472_EBO_36_1_261219.raw_20230418_Amel\objs\params.prf
	4) Date/Time: April 19, 2023 1:19:57 AM IDT
	5) RunTime: 5 hours, 4 minutes, 56 seconds; on 34 cores
Summary Statistics:
	1) Reporting 2 forward and 2 reverse proteins
	2) 1660 unique forward peptides
	3) 3615 spectra matched to forward peptides
	4) Estimated spectrum-level FDR on true proteins is 0.3%
Recorded protein search configuration:
Num	Rule	Value
0	Protein database	H:\Proteomics\Projects\Boaretto\INCPM_18273\AMELs Cattle fasta Pau 2.Fasta
1	Spectrum-level FDR	Auto cut
2	Cleavage residues	KR
3	Digest cutter	C-terminal cutter
4	Peptide termini	Non specific
5	Maximum number of missed cleavages	Any missed cleavages (-1)
6	Precursor tolerance	10.0 ppm
7	Fragment tolerance	frag:qtof_hcd 20.0 ppm
8	Fragment tolerance version	2
9	Charges applied to charge-unassigned spectra:	1,2,3
10	Precursor mass max	7500.0
11	N-glycan search	None
12	O-glycan search	None
13	Off by x isotopes	-2,-1,0,+1,+2
14	Contaminants added	false
15	Decoys added	true
16	%Additional parameters:
17	Disulfide Enable	false
18	Trisulfide Enable	false
19	DSS Crosslink Enable	false
20	Custom Crosslink Enable	false
21	Wildcard Enable	0
22	Combyne cut off score	Auto
23	Protein FDR cutoff	1%
24	Focused DB created	true
25	Export mzIdentML	true
26	Score version	2
27	precursor_assignment_flags	2
28	po_NumberMonosReturn	2
29	Lock mass list	None
30	do_quick_rejects	0
31	%Modification searches:
32	common_modifications_max	2
33	rare_modifications_max	2
34	%Fixed and variable modifications:
35	Oxidation / +15.994915 @ F, H, K, M, P, W, Y | common2
36	Deamidated / +0.984016 @ N, Q, R | common2
37	Acetyl / +42.010565 @ Protein NTerm | rare1
38	Dioxidation / +31.989829 @ F, M, P, W, Y | rare2
39	Gln->pyro-Glu / -17.026549 @ Protein NTerm Q | rare1
40	Glu->pyro-Glu / -18.010565 @ Protein NTerm E | rare1
41	Phospho / +79.966331 @ S | rare1
42	% Custom modification text below
43	%Glycan modifications:
44	% Custom modification text below
45	Show all N-glycopeptides	0
46	%Addition parameters:
47	Product Version	PMI-Byonic-Com:v4.6.1
48	Registered to	david Morgenstern G-INCPM

## Sheet: Spectra
Query #:z	Protein Rank	Peptide < ProteinMetrics Confidential >	Glycans NHFAGNa	Modification Type(s)	Observed m/z	z	Observed (M+H)	Calc. mass (M+H)	Off-by-x error	Mass error (ppm)	Starting position	Cleavage	Score	Delta	Delta Mod	|Log Prob|	# of unique peptides	Protein Name	Protein DB number	Comment	Scan #	Scan Time
32005:5	1	M.GTW[+31.990]ILF[+15.995]ACLLGAAFSMPLPPHPGHPGYIN[+0.984]FS[+79.966]YEVLTPLKW.Y		F[+16], N[+1], S[+80], W[+32]	914.648	5	4569.21	4570.21	-1	2.3	2	Non	298.82	26.69	8.63	2.21	1509	>sp|P02817|AMELX_BOVIN Amelogenin, X isoform OS=Bos taurus OX=9913 GN=AMELX PE=1 SV=2	1	hf1_10472_ebo_36_1_261219.ScanId;v=1;d1=23937.23937.5	controllerType=0 controllerNumber=1 scan=23937	51.6693
17987:4	1	T.W[+15.995]ILF[+31.990]ACLLGAAFSM[+15.995]PLPPHPGHPGYINF.S		F[+32], M[+16], W[+16]	783.39	4	3130.54	3130.53	0	1.9	4	Non	220.47	0.35	0.35	0.69	1509	>sp|P02817|AMELX_BOVIN Amelogenin, X isoform OS=Bos taurus OX=9913 GN=AMELX PE=1 SV=2	1	hf1_10472_ebo_36_1_261219.ScanId;v=1;d1=14752.14752.4	controllerType=0 controllerNumber=1 scan=14752	35.2373
27521:6	1	T.WILFACLLGAAFSMPLPPHPGHPGYINFS[+79.966]YEVLTPLK.W		S[+80]	697.018	6	4177.07	4177.09	0	-3.7	4	NRagged	345.72	148.49	103.93	2.55	1509	>sp|P02817|AMELX_BOVIN Amelogenin, X isoform OS=Bos taurus OX=9913 GN=AMELX PE=1 SV=2	1	hf1_10472_ebo_36_1_261219.ScanId;v=1;d1=21077.21077.6	controllerType=0 controllerNumber=1 scan=21077	46.5013
27626:6	1	T.WILFACLLGAAFSMPLPPHPGHPGYINFS[+79.966]YEVLTPLK.W		S[+80]	697.187	6	4178.08	4177.09	1	-1.7	4	NRagged	422.9	235.02	177.59	4	1509	>sp|P02817|AMELX_BOVIN Amelogenin, X isoform OS=Bos taurus OX=9913 GN=AMELX PE=1 SV=2	1	hf1_10472_ebo_36_1_261219.ScanId;v=1;d1=21143.21143.4	controllerType=0 controllerNumber=1 scan=21143	46.625
28800:6	1	T.WILFACLLGAAFSMPLPPHPGHPGYIN[+0.984]FS[+79.966]YEVLTPLK.W		N[+1], S[+80]	697.185	6	4178.07	4178.07	0	-0.2	4	NRagged	202.17	202.17	79.16	2.6	1509	>sp|P02817|AMELX_BOVIN Amelogenin, X isoform OS=Bos taurus OX=9913 GN=AMELX PE=1 SV=2	1	hf1_10472_ebo_36_1_261219.ScanId;v=1;d1=21883.21883.6	controllerType=0 controllerNumber=1 scan=21883	47.9594
28231:6	1	T.WILFACLLGAAFSMPLPPHPGHPGYIN[+0.984]FS[+79.966]YEVLTPLK.W		N[+1], S[+80]	697.185	6	4178.07	4178.07	0	-0.2	4	NRagged	318.77	118.63	34.95	2.54	1509	>sp|P02817|AMELX_BOVIN Amelogenin, X isoform OS=Bos taurus OX=9913 GN=AMELX PE=1 SV=2	1	hf1_10472_ebo_36_1_261219.ScanId;v=1;d1=21518.21518.6	controllerType=0 controllerNumber=1 scan=21518	47.311
28535:6	1	T.WILFACLLGAAFSMPLPPHPGHPGYIN[+0.984]FS[+79.966]YEVLTPLK.W		N[+1], S[+80]	697.184	6	4178.07	4178.07	0	-1.1	4	NRagged	325.9	207.14	192.76	3.8	1509	>sp|P02817|AMELX_BOVIN Amelogenin, X isoform OS=Bos taurus OX=9913 GN=AMELX PE=1 SV=2	1	hf1_10472_ebo_36_1_261219.ScanId;v=1;d1=21717.21717.4	controllerType=0 controllerNumber=1 scan=21717	47.6627
42459:4	1	I.LFACLLGAAFSMPLPPHPGHPGY[+31.990]INF[+31.990]SYEVLTPLKWYQSM[+15.995]IR.H		F[+32], M[+16], Y[+32]	1211.36	4	4842.42	4842.39	0	6.2	6	NRagged	26.3	7.71	3.74	2.22	1509	>sp|P02817|AMELX_BOVIN Amelogenin, X isoform OS=Bos taurus OX=9913 GN=AMELX PE=1 SV=2	1	hf1_10472_ebo_36_1_261219.ScanId;v=1;d1=30563.30563.4	controllerType=0 controllerNumber=1 scan=30563	63.6684
28224:5	1	L.F[+31.990]ACLLGAAFSMPLPPHPGHPGYINF[+31.990]SYEVLTPLKW[+15.995]YQSM[+15.995]IR.H		F[+32]*2, M[+16], W[+16]	949.672	5	4744.33	4745.3	-1	6.5	7	NRagged	221.38	221.38	0.92	5.33	1509	>sp|P02817|AMELX_BOVIN Amelogenin, X isoform OS=Bos taurus OX=9913 GN=AMELX PE=1 SV=2	1	hf1_10472_ebo_36_1_261219.ScanId;v=1;d1=21513.21513.4	controllerType=0 controllerNumber=1 scan=21513	47.3006
27361:5	1	A.CLLGAAFSMPLPPHPGHPGYINFSYEVLTPLKWYQSM[+15.995].I		M[+16]	836.62	5	4179.07	4178.04	1	7.2	9	Non	168.19	21.32	21.32	2.23	1509	>sp|P02817|AMELX_BOVIN Amelogenin, X isoform OS=Bos taurus OX=9913 GN=AMELX PE=1 SV=2	1	hf1_10472_ebo_36_1_261219.ScanId;v=1;d1=20975.20975.5	controllerType=0 controllerNumber=1 scan=20975	46.3145
31531:5	1	A.CLLGAAF[+15.995]SMPLPPHPGHPGYINFS[+79.966]YEVLTPLKWYQSM[+15.995]IR.H		F[+16], M[+16], S[+80]	909.234	5	4542.14	4543.18	-1	-8.9	9	NRagged	451.9	41.43	20.36	3.64	1509	>sp|P02817|AMELX_BOVIN Amelogenin, X isoform OS=Bos taurus OX=9913 GN=AMELX PE=1 SV=2	1	hf1_10472_ebo_36_1_261219.ScanId;v=1;d1=23629.23629.5	controllerType=0 controllerNumber=1 scan=23629	51.1075
34067:6	1	A.CLLGAAFSMPLP[+31.990]PHPGHP[+31.990]GYINFSYEVLTPLKWYQ[+0.984]SM[+15.995]IR.H		M[+16], P[+32]*2, Q[+1]	753.035	6	4513.18	4512.19	1	-3.2	9	NRagged	170.29	170.29	0	2.71	1509	>sp|P02817|AMELX_BOVIN Amelogenin, X isoform OS=Bos taurus OX=9913 GN=AMELX PE=1 SV=2	1	hf1_10472_ebo_36_1_261219.ScanId;v=1;d1=25287.25287.5	controllerType=0 controllerNumber=1 scan=25287	54.1685
29925:6	1	A.CLLGAAFS[+79.966]MPLPPHPGHPGYINFSYEVLTPLKW[+15.995]YQSM[+15.995]IRHPYP.S		M[+16], S[+80], W[+16]	840.568	6	5038.37	5037.41	1	-8.3	9	Non	103.64	103.64	1	2.21	1509	>sp|P02817|AMELX_BOVIN Amelogenin, X isoform OS=Bos taurus OX=9913 GN=AMELX PE=1 SV=2	1	hf1_10472_ebo_36_1_261219.ScanId;v=1;d1=22582.22582.3	controllerType=0 controllerNumber=1 scan=22582	49.2201
07943:2	1	F.SM[+15.995]PLPPHPG.H		M[+16]	474.737	2	948.466	948.461	0	5.7	16	Non	232.51	232.51	158.1	2.34	1509	>sp|P02817|AMELX_BOVIN Amelogenin, X isoform OS=Bos taurus OX=9913 GN=AMELX PE=1 SV=2	1	hf1_10472_ebo_36_1_261219.ScanId;v=1;d1=7683.7683.2	controllerType=0 controllerNumber=1 scan=7683	22.1551
18207:3	1	F.SM[+15.995]PLPPHPGHPGYINF.S		M[+16]	592.958	3	1776.86	1776.85	0	4.7	16	Non	217.42	32.52	32.52	2.21	1509	>sp|P02817|AMELX_BOVIN Amelogenin, X isoform OS=Bos taurus OX=9913 GN=AMELX PE=1 SV=2	1	hf1_10472_ebo_36_1_261219.ScanId;v=1;d1=14912.14912.3	controllerType=0 controllerNumber=1 scan=14912	35.5309
17941:3	1	F.SM[+15.995]PLPPHPGHPGYINF.S		M[+16]	592.957	3	1776.86	1776.85	0	2.7	16	Non	222.96	60.63	40.51	2.21	1509	>sp|P02817|AMELX_BOVIN Amelogenin, X isoform OS=Bos taurus OX=9913 GN=AMELX PE=1 SV=2	1	hf1_10472_ebo_36_1_261219.ScanId;v=1;d1=14718.14718.3	controllerType=0 controllerNumber=1 scan=14718	35.1801
18208:3	1	F.SM[+15.995]PLPPHPGHPGYIN[+0.984]F.S		M[+16], N[+1]	593.285	3	1777.84	1777.84	0	2.9	16	Non	158.29	31.26	31.26	1.2	1509	>sp|P02817|AMELX_BOVIN Amelogenin, X isoform OS=Bos taurus OX=9913 GN=AMELX PE=1 SV=2	1	hf1_10472_ebo_36_1_261219.ScanId;v=1;d1=14912.14912.3	controllerType=0 controllerNumber=1 scan=14912	35.5309
45191:3	1	F.SMPLPPHPGHPGYINF[+31.990]SYEVLTPLK.W		F[+32]	941.815	3	2823.43	2823.42	0	4.4	16	NRagged	17.89	17.89	2.66	2.38	1509	>sp|P02817|AMELX_BOVIN Amelogenin, X isoform OS=Bos taurus OX=9913 GN=AMELX PE=1 SV=2	1	hf1_10472_ebo_36_1_261219.ScanId;v=1;d1=33621.33621.3	controllerType=0 controllerNumber=1 scan=33621	73.4392
31241:3	1	F.SMPLPPHPGHPGYIN[+0.984]FS[+79.966]YEVLTPLK.W		N[+1], S[+80]	958.125	3	2872.36	2872.38	0	-6.1	16	NRagged	140.48	140.48	75.47	1.9	1509	>sp|P02817|AMELX_BOVIN Amelogenin, X isoform OS=Bos taurus OX=9913 GN=AMELX PE=1 SV=2	1	hf1_10472_ebo_36_1_261219.ScanId;v=1;d1=23442.23442.3	controllerType=0 controllerNumber=1 scan=23442	50.7692
30591:3	1	F.SMPLPPHPGHPGYIN[+0.984]FS[+79.966]YEVLTPLK.W		N[+1], S[+80]	958.125	3	2872.36	2872.38	0	-6.3	16	NRagged	146.55	146.55	79.34	1.9	1509	>sp|P02817|AMELX_BOVIN Amelogenin, X isoform OS=Bos taurus OX=9913 GN=AMELX PE=1 SV=2	1	hf1_10472_ebo_36_1_261219.ScanId;v=1;d1=23011.23011.3	controllerType=0 controllerNumber=1 scan=23011	49.9896
30870:3	1	F.SMPLPPHPGHPGYIN[+0.984]FS[+79.966]YEVLTPLK.W		N[+1], S[+80]	958.125	3	2872.36	2872.38	0	-6.3	16	NRagged	232.53	232.53	119.32	2.59	1509	>sp|P02817|AMELX_BOVIN Amelogenin, X isoform OS=Bos taurus OX=9913 GN=AMELX PE=1 SV=2	1	hf1_10472_ebo_36_1_261219.ScanId;v=1;d1=23196.23196.3	controllerType=0 controllerNumber=1 scan=23196	50.3297
26207:3	1	F.SM[+15.995]PLPPHPGHPGYINFS[+79.966]YEVLTPLK.W		M[+16], S[+80]	963.143	3	2887.41	2887.39	0	8.5	16	NRagged	562.43	562.43	147.96	7.49	1509	>sp|P02817|AMELX_BOVIN Amelogenin, X isoform OS=Bos taurus OX=9913 GN=AMELX PE=1 SV=2	1	hf1_10472_ebo_36_1_261219.ScanId;v=1;d1=20219.20219.3	controllerType=0 controllerNumber=1 scan=20219	44.9777
26059:3	1	F.SM[+15.995]PLPPHPGHPGYINFS[+79.966]YEVLTPLK.W		M[+16], S[+80]	963.14	3	2887.41	2887.39	0	6.2	16	NRagged	624.52	624.52	205.22	9.71	1509	>sp|P02817|AMELX_BOVIN Amelogenin, X isoform OS=Bos taurus OX=9913 GN=AMELX PE=1 SV=2	1	hf1_10472_ebo_36_1_261219.ScanId;v=1;d1=20121.20121.3	controllerType=0 controllerNumber=1 scan=20121	44.8022
26447:4	1	F.SMPLPP[+31.990]HPGHPGYIN[+0.984]FSY[+31.990]EVLTPLK.W		N[+1], P[+32], Y[+32]	714.856	4	2856.4	2856.39	0	3.1	16	NRagged	71.43	27.8	0	1.23	1509	>sp|P02817|AMELX_BOVIN Amelogenin, X isoform OS=Bos taurus OX=9913 GN=AMELX PE=1 SV=2	1	hf1_10472_ebo_36_1_261219.ScanId;v=1;d1=20382.20382.4	controllerType=0 controllerNumber=1 scan=20382	45.266
26772:3	1	F.SM[+15.995]PLPPHPGHPGYIN[+0.984]FS[+79.966]YEVLTPLK.W		M[+16], N[+1], S[+80]	963.468	3	2888.39	2888.37	0	6	16	NRagged	352.62	346.29	167.78	6.16	1509	>sp|P02817|AMELX_BOVIN Amelogenin, X isoform OS=Bos taurus OX=9913 GN=AMELX PE=1 SV=2	1	hf1_10472_ebo_36_1_261219.ScanId;v=1;d1=20595.20595.3	controllerType=0 controllerNumber=1 scan=20595	45.6397
32697:4	1	F.SM[+15.995]PLPPHP[+15.995]GHPGY[+31.990]INF[+31.990]SYEVLTPLKWY.Q		F[+32], M[+16], P[+16], Y[+32]	809.893	4	3236.55	3236.54	0	3.6	16	Non	157.67	157.67	3.39	2.47	1509	>sp|P02817|AMELX_BOVIN Amelogenin, X isoform OS=Bos taurus OX=9913 GN=AMELX PE=1 SV=2	1	hf1_10472_ebo_36_1_261219.ScanId;v=1;d1=24388.24388.4	controllerType=0 controllerNumber=1 scan=24388	52.5033
31216:4	1	F.SM[+15.995]PLPPHPGHPGYINFS[+79.966]YEVLTPLKWYQSM[+15.995]IR.H		M[+16]*2, S[+80]	967.72	4	3867.86	3867.84	0	3.8	16	NRagged	156.94	156.94	16.4	3.22	1509	>sp|P02817|AMELX_BOVIN Amelogenin, X isoform OS=Bos taurus OX=9913 GN=AMELX PE=1 SV=2	1	hf1_10472_ebo_36_1_261219.ScanId;v=1;d1=23428.23428.4	controllerType=0 controllerNumber=1 scan=23428	50.7453
34907:4	1	F.SMPLPPHPGHPGYINFS[+79.966]YEVLTPLKWYQSM[+15.995]IRHPYP.S		M[+16], S[+80]	1087.52	4	4347.07	4346.08	1	-1.2	16	Non	56.3	5.63	5.63	1.1	1509	>sp|P02817|AMELX_BOVIN Amelogenin, X isoform OS=Bos taurus OX=9913 GN=AMELX PE=1 SV=2	1	hf1_10472_ebo_36_1_261219.ScanId;v=1;d1=25819.25819.4	controllerType=0 controllerNumber=1 scan=25819	55.1393
30924:5	1	F.SMPLPP[+31.990]HPGHPGYINFSY[+31.990]EVLTPLKWYQSM[+15.995]IRHPYP.S		M[+16], P[+32], Y[+32]	866.823	5	4330.09	4330.09	0	-0.3	16	Non	156.47	156.47	4.33	2.3	1509	>sp|P02817|AMELX_BOVIN Amelogenin, X isoform OS=Bos taurus OX=9913 GN=AMELX PE=1 SV=2	1	hf1_10472_ebo_36_1_261219.ScanId;v=1;d1=23232.23232.5	controllerType=0 controllerNumber=1 scan=23232	50.3929
32278:5	1	F.SMPLPPHP[+31.990]GHPGYINFSY[+31.990]EVLTPLKWYQSM[+15.995]IR[+0.984]HPYP.S		M[+16], P[+32], R[+1], Y[+32]	867.221	5	4332.07	4331.07	1	-0.7	16	Non	70.26	51.57	11.33	2.23	1509	>sp|P02817|AMELX_BOVIN Amelogenin, X isoform OS=Bos taurus OX=9913 GN=AMELX PE=1 SV=2	1	hf1_10472_ebo_36_1_261219.ScanId;v=1;d1=24111.24111.5	controllerType=0 controllerNumber=1 scan=24111	51.9899
08722:1	1	S.M[+15.995]PLPP.H		M[+16]	570.299	1	570.299	570.296	0	6.2	17	Non	210.67	3.44	3.44	0.94	1509	>sp|P02817|AMELX_BOVIN Amelogenin, X isoform OS=Bos taurus OX=9913 GN=AMELX PE=1 SV=2	1	hf1_10472_ebo_36_1_261219.ScanId;v=1;d1=8252.8252.3	controllerType=0 controllerNumber=1 scan=8252	23.1854
09912:1	1	S.M[+15.995]PLPP.H		M[+16]	570.299	1	570.299	570.296	0	6	17	Non	249.72	16.37	16.37	2.27	1509	>sp|P02817|AMELX_BOVIN Amelogenin, X isoform OS=Bos taurus OX=9913 GN=AMELX PE=1 SV=2	1	hf1_10472_ebo_36_1_261219.ScanId;v=1;d1=9062.9062.2	controllerType=0 controllerNumber=1 scan=9062	24.6531
09268:1	1	S.M[+15.995]PLPP.H		M[+16]	570.299	1	570.299	570.296	0	6.2	17	Non	264.38	3.76	3.76	2.27	1509	>sp|P02817|AMELX_BOVIN Amelogenin, X isoform OS=Bos taurus OX=9913 GN=AMELX PE=1 SV=2	1	hf1_10472_ebo_36_1_261219.ScanId;v=1;d1=8625.8625.2	controllerType=0 controllerNumber=1 scan=8625	23.8567
09542:1	1	S.M[+15.995]PLPP.H		M[+16]	570.299	1	570.299	570.296	0	5.8	17	Non	284.33	19.07	19.07	2.28	1509	>sp|P02817|AMELX_BOVIN Amelogenin, X isoform OS=Bos taurus OX=9913 GN=AMELX PE=1 SV=2	1	hf1_10472_ebo_36_1_261219.ScanId;v=1;d1=8814.8814.2	controllerType=0 controllerNumber=1 scan=8814	24.1989
04866:1	1	S.M[+15.995]PLPPH.P		M[+16]	707.36	1	707.36	707.355	0	7.4	17	Non	205.04	205.04	38.93	2.4	1509	>sp|P02817|AMELX_BOVIN Amelogenin, X isoform OS=Bos taurus OX=9913 GN=AMELX PE=1 SV=2	1	hf1_10472_ebo_36_1_261219.ScanId;v=1;d1=5465.5465.3	controllerType=0 controllerNumber=1 scan=5465	18.1336
05228:1	1	S.M[+15.995]PLPPH.P		M[+16]	707.358	1	707.358	707.355	0	4.4	17	Non	220.52	220.52	37.89	2.43	1509	>sp|P02817|AMELX_BOVIN Amelogenin, X isoform OS=Bos taurus OX=9913 GN=AMELX PE=1 SV=2	1	hf1_10472_ebo_36_1_261219.ScanId;v=1;d1=5738.5738.2	controllerType=0 controllerNumber=1 scan=5738	18.6359
13425:2	1	S.MPLPPHP.G			394.711	2	788.415	788.412	0	3	17	Non	277.64	148.7	148.7	2.32	1509	>sp|P02817|AMELX_BOVIN Amelogenin, X isoform OS=Bos taurus OX=9913 GN=AMELX PE=1 SV=2	1	hf1_10472_ebo_36_1_261219.ScanId;v=1;d1=11520.11520.2	controllerType=0 controllerNumber=1 scan=11520	29.3836
13834:2	1	S.MPLPPHP.G			394.712	2	788.416	788.412	0	4.4	17	Non	389.18	251.24	251.24	4.03	1509	>sp|P02817|AMELX_BOVIN Amelogenin, X isoform OS=Bos taurus OX=9913 GN=AMELX PE=1 SV=2	1	hf1_10472_ebo_36_1_261219.ScanId;v=1;d1=11800.11800.2	controllerType=0 controllerNumber=1 scan=11800	29.8932
10126:2	1	S.MP[+31.990]LPPHP.G		P[+32]	410.707	2	820.407	820.402	0	6.2	17	Non	169.55	169.55	0	2.21	1509	>sp|P02817|AMELX_BOVIN Amelogenin, X isoform OS=Bos taurus OX=9913 GN=AMELX PE=1 SV=2	1	hf1_10472_ebo_36_1_261219.ScanId;v=1;d1=9211.9211.2	controllerType=0 controllerNumber=1 scan=9211	24.928
08555:1	1	S.M[+15.995]PLPPHP.G		M[+16]	804.412	1	804.412	804.407	0	6.2	17	Non	190.47	170.79	18.63	2.64	1509	>sp|P02817|AMELX_BOVIN Amelogenin, X isoform OS=Bos taurus OX=9913 GN=AMELX PE=1 SV=2	1	hf1_10472_ebo_36_1_261219.ScanId;v=1;d1=8131.8131.2	controllerType=0 controllerNumber=1 scan=8131	22.9735
10842:2	1	S.M[+15.995]PLPPHP.G		M[+16]	402.709	2	804.411	804.407	0	4.6	17	Non	320.66	251.69	67.87	3.71	1509	>sp|P02817|AMELX_BOVIN Amelogenin, X isoform OS=Bos taurus OX=9913 GN=AMELX PE=1 SV=2	1	hf1_10472_ebo_36_1_261219.ScanId;v=1;d1=9690.9690.2	controllerType=0 controllerNumber=1 scan=9690	25.7882
07717:2	1	S.M[+15.995]PLPPHP.G		M[+16]	402.709	2	804.411	804.407	0	4.6	17	Non	332.59	204.56	55.17	3.46	1509	>sp|P02817|AMELX_BOVIN Amelogenin, X isoform OS=Bos taurus OX=9913 GN=AMELX PE=1 SV=2	1	hf1_10472_ebo_36_1_261219.ScanId;v=1;d1=7518.7518.2	controllerType=0 controllerNumber=1 scan=7518	21.8431
10551:2	1	S.M[+15.995]PLPPHP.G		M[+16]	402.71	2	804.412	804.407	0	5.9	17	Non	356.57	231.69	58.13	3.46	1509	>sp|P02817|AMELX_BOVIN Amelogenin, X isoform OS=Bos taurus OX=9913 GN=AMELX PE=1 SV=2	1	hf1_10472_ebo_36_1_261219.ScanId;v=1;d1=9495.9495.2	controllerType=0 controllerNumber=1 scan=9495	25.4373
08489:2	1	S.M[+15.995]PLPPHP.G		M[+16]	402.709	2	804.412	804.407	0	5.2	17	Non	417.48	234.16	95.54	3.73	1509	>sp|P02817|AMELX_BOVIN Amelogenin, X isoform OS=Bos taurus OX=9913 GN=AMELX PE=1 SV=2	1	hf1_10472_ebo_36_1_261219.ScanId;v=1;d1=8082.8082.2	controllerType=0 controllerNumber=1 scan=8082	22.8829
10074:2	1	S.M[+15.995]PLPPHP.G		M[+16]	402.71	2	804.412	804.407	0	5.9	17	Non	418.68	268.55	87.66	3.99	1509	>sp|P02817|AMELX_BOVIN Amelogenin, X isoform OS=Bos taurus OX=9913 GN=AMELX PE=1 SV=2	1	hf1_10472_ebo_36_1_261219.ScanId;v=1;d1=9178.9178.2	controllerType=0 controllerNumber=1 scan=9178	24.8706
09810:2	1	S.M[+15.995]PLPPHP.G		M[+16]	402.71	2	804.412	804.407	0	5.8	17	Non	424.55	238.48	89.38	3.73	1509	>sp|P02817|AMELX_BOVIN Amelogenin, X isoform OS=Bos taurus OX=9913 GN=AMELX PE=1 SV=2	1	hf1_10472_ebo_36_1_261219.ScanId;v=1;d1=8995.8995.2	controllerType=0 controllerNumber=1 scan=8995	24.5306
08225:2	1	S.M[+15.995]PLPPHP.G		M[+16]	402.709	2	804.412	804.407	0	5.4	17	Non	430.44	272.47	94.33	4.05	1509	>sp|P02817|AMELX_BOVIN Amelogenin, X isoform OS=Bos taurus OX=9913 GN=AMELX PE=1 SV=2	1	hf1_10472_ebo_36_1_261219.ScanId;v=1;d1=7888.7888.2	controllerType=0 controllerNumber=1 scan=7888	22.5359
09320:2	1	S.M[+15.995]PLPPHP.G		M[+16]	402.71	2	804.412	804.407	0	5.8	17	Non	440.72	263.12	87.72	4.01	1509	>sp|P02817|AMELX_BOVIN Amelogenin, X isoform OS=Bos taurus OX=9913 GN=AMELX PE=1 SV=2	1	hf1_10472_ebo_36_1_261219.ScanId;v=1;d1=8660.8660.2	controllerType=0 controllerNumber=1 scan=8660	23.9198
07972:2	1	S.M[+15.995]PLPPHP.G		M[+16]	402.709	2	804.411	804.407	0	5	17	Non	455.79	239.73	93.92	3.81	1509	>sp|P02817|AMELX_BOVIN Amelogenin, X isoform OS=Bos taurus OX=9913 GN=AMELX PE=1 SV=2	1	hf1_10472_ebo_36_1_261219.ScanId;v=1;d1=7703.7703.2	controllerType=0 controllerNumber=1 scan=7703	22.1931
08755:2	1	S.M[+15.995]PLPPHP.G		M[+16]	402.71	2	804.413	804.407	0	6.5	17	Non	465.78	272.49	91.99	3.99	1509	>sp|P02817|AMELX_BOVIN Amelogenin, X isoform OS=Bos taurus OX=9913 GN=AMELX PE=1 SV=2	1	hf1_10472_ebo_36_1_261219.ScanId;v=1;d1=8275.8275.2	controllerType=0 controllerNumber=1 scan=8275	23.2282
09031:2	1	S.M[+15.995]PLPPHP.G		M[+16]	402.71	2	804.412	804.407	0	6.3	17	Non	484.57	285.24	110.18	4.04	1509	>sp|P02817|AMELX_BOVIN Amelogenin, X isoform OS=Bos taurus OX=9913 GN=AMELX PE=1 SV=2	1	hf1_10472_ebo_36_1_261219.ScanId;v=1;d1=8467.8467.2	controllerType=0 controllerNumber=1 scan=8467	23.5775
11997:2	1	S.MPLPPHPG.H			423.222	2	845.437	845.434	0	3.7	17	Non	253.25	253.25	253.25	3.12	1509	>sp|P02817|AMELX_BOVIN Amelogenin, X isoform OS=Bos taurus OX=9913 GN=AMELX PE=1 SV=2	1	hf1_10472_ebo_36_1_261219.ScanId;v=1;d1=10492.10492.2	controllerType=0 controllerNumber=1 scan=10492	27.2876
13422:2	1	S.MPLPPHPG.H			423.222	2	845.437	845.434	0	3.3	17	Non	383.9	359.63	359.63	3.74	1509	>sp|P02817|AMELX_BOVIN Amelogenin, X isoform OS=Bos taurus OX=9913 GN=AMELX PE=1 SV=2	1	hf1_10472_ebo_36_1_261219.ScanId;v=1;d1=11518.11518.2	controllerType=0 controllerNumber=1 scan=11518	29.3812
13164:2	1	S.MPLPPHPG.H			423.223	2	845.438	845.434	0	4.7	17	Non	401.38	296.33	296.33	4.06	1509	>sp|P02817|AMELX_BOVIN Amelogenin, X isoform OS=Bos taurus OX=9913 GN=AMELX PE=1 SV=2	1	hf1_10472_ebo_36_1_261219.ScanId;v=1;d1=11338.11338.2	controllerType=0 controllerNumber=1 scan=11338	29.0426
12268:2	1	S.MPLPPHPG.H			423.223	2	845.438	845.434	0	4.6	17	Non	406.9	390.73	390.73	5.12	1509	>sp|P02817|AMELX_BOVIN Amelogenin, X isoform OS=Bos taurus OX=9913 GN=AMELX PE=1 SV=2	1	hf1_10472_ebo_36_1_261219.ScanId;v=1;d1=10681.10681.2	controllerType=0 controllerNumber=1 scan=10681	27.6421
12941:2	1	S.MPLPPHPG.H			423.223	2	845.438	845.434	0	4.8	17	Non	418.8	315.62	315.62	4.06	1509	>sp|P02817|AMELX_BOVIN Amelogenin, X isoform OS=Bos taurus OX=9913 GN=AMELX PE=1 SV=2	1	hf1_10472_ebo_36_1_261219.ScanId;v=1;d1=11174.11174.2	controllerType=0 controllerNumber=1 scan=11174	28.6876
12523:2	1	S.MPLPPHPG.H			423.223	2	845.438	845.434	0	5.4	17	Non	433.67	388.09	388.09	5.21	1509	>sp|P02817|AMELX_BOVIN Amelogenin, X isoform OS=Bos taurus OX=9913 GN=AMELX PE=1 SV=2	1	hf1_10472_ebo_36_1_261219.ScanId;v=1;d1=10860.10860.2	controllerType=0 controllerNumber=1 scan=10860	27.9805
12819:2	1	S.MPLPPHPG.H			423.223	2	845.438	845.434	0	5.3	17	Non	445.63	302.27	302.27	4.14	1509	>sp|P02817|AMELX_BOVIN Amelogenin, X isoform OS=Bos taurus OX=9913 GN=AMELX PE=1 SV=2	1	hf1_10472_ebo_36_1_261219.ScanId;v=1;d1=11055.11055.2	controllerType=0 controllerNumber=1 scan=11055	28.3328
45518:2	1	S.MP[+15.995]LPPHPG.H		P[+16]	431.22	2	861.433	861.429	0	4.8	17	Non	43.45	43.45	4	1.16	1509	>sp|P02817|AMELX_BOVIN Amelogenin, X isoform OS=Bos taurus OX=9913 GN=AMELX PE=1 SV=2	1	hf1_10472_ebo_36_1_261219.ScanId;v=1;d1=34447.34447.2	controllerType=0 controllerNumber=1 scan=34447	77.5589
45475:2	1	S.M[+15.995]PLPPHPG.H		M[+16]	431.22	2	861.433	861.429	0	5.1	17	Non	85.15	85.15	20.68	2.21	1509	>sp|P02817|AMELX_BOVIN Amelogenin, X isoform OS=Bos taurus OX=9913 GN=AMELX PE=1 SV=2	1	hf1_10472_ebo_36_1_261219.ScanId;v=1;d1=34316.34316.2	controllerType=0 controllerNumber=1 scan=34316	76.8742
45538:2	1	S.M[+15.995]PLPPHPG.H		M[+16]	431.22	2	861.433	861.429	0	4.6	17	Non	94.17	94.17	27.08	2.21	1509	>sp|P02817|AMELX_BOVIN Amelogenin, X isoform OS=Bos taurus OX=9913 GN=AMELX PE=1 SV=2	1	hf1_10472_ebo_36_1_261219.ScanId;v=1;d1=34512.34512.2	controllerType=0 controllerNumber=1 scan=34512	77.8977
45498:2	1	S.M[+15.995]PLPPHPG.H		M[+16]	431.22	2	861.433	861.429	0	5.1	17	Non	121.5	121.5	30.97	2.24	1509	>sp|P02817|AMELX_BOVIN Amelogenin, X isoform OS=Bos taurus OX=9913 GN=AMELX PE=1 SV=2	1	hf1_10472_ebo_36_1_261219.ScanId;v=1;d1=34382.34382.2	controllerType=0 controllerNumber=1 scan=34382	77.2157
00004:2	1	S.M[+15.995]PLPPHPG.H		M[+16]	431.222	2	861.437	861.429	0	9.3	17	Non	212.91	212.91	32.95	2.35	1509	>sp|P02817|AMELX_BOVIN Amelogenin, X isoform OS=Bos taurus OX=9913 GN=AMELX PE=1 SV=2	1	hf1_10472_ebo_36_1_261219.ScanId;v=1;d1=103.103.2	controllerType=0 controllerNumber=1 scan=103	0.559
09530:2	1	S.MP[+31.990]LPPHPG.H		P[+32]	439.216	2	877.425	877.424	0	1.6	17	Non	244.1	75.46	1.8	2.22	1509	>sp|P02817|AMELX_BOVIN Amelogenin, X isoform OS=Bos taurus OX=9913 GN=AMELX PE=1 SV=2	1	hf1_10472_ebo_36_1_261219.ScanId;v=1;d1=8806.8806.3	controllerType=0 controllerNumber=1 scan=8806	24.1841
09803:2	1	S.M[+31.990]PLPPHPG.H		M[+32]	439.216	2	877.425	877.424	0	2	17	Non	246.58	69.26	8.42	2.21	1509	>sp|P02817|AMELX_BOVIN Amelogenin, X isoform OS=Bos taurus OX=9913 GN=AMELX PE=1 SV=2	1	hf1_10472_ebo_36_1_261219.ScanId;v=1;d1=8991.8991.3	controllerType=0 controllerNumber=1 scan=8991	24.5251
09824:2	1	S.M[+15.995]PLPPHPG.H		M[+16]	431.221	2	861.434	861.429	0	6	17	Non	350.99	305.06	78.63	3.78	1509	>sp|P02817|AMELX_BOVIN Amelogenin, X isoform OS=Bos taurus OX=9913 GN=AMELX PE=1 SV=2	1	hf1_10472_ebo_36_1_261219.ScanId;v=1;d1=9003.9003.2	controllerType=0 controllerNumber=1 scan=9003	24.5453
10094:2	1	S.M[+15.995]PLPPHPG.H		M[+16]	431.221	2	861.434	861.429	0	6.6	17	Non	369.81	329.45	88.11	4.12	1509	>sp|P02817|AMELX_BOVIN Amelogenin, X isoform OS=Bos taurus OX=9913 GN=AMELX PE=1 SV=2	1	hf1_10472_ebo_36_1_261219.ScanId;v=1;d1=9190.9190.2	controllerType=0 controllerNumber=1 scan=9190	24.8913
09539:2	1	S.M[+15.995]PLPPHPG.H		M[+16]	431.221	2	861.434	861.429	0	5.9	17	Non	394.35	334.6	95.42	3.97	1509	>sp|P02817|AMELX_BOVIN Amelogenin, X isoform OS=Bos taurus OX=9913 GN=AMELX PE=1 SV=2	1	hf1_10472_ebo_36_1_261219.ScanId;v=1;d1=8812.8812.2	controllerType=0 controllerNumber=1 scan=8812	24.1959
07397:2	1	S.M[+15.995]PLPPHPG.H		M[+16]	431.22	2	861.433	861.429	0	5.3	17	Non	438.85	355.74	98.09	4.26	1509	>sp|P02817|AMELX_BOVIN Amelogenin, X isoform OS=Bos taurus OX=9913 GN=AMELX PE=1 SV=2	1	hf1_10472_ebo_36_1_261219.ScanId;v=1;d1=7287.7287.2	controllerType=0 controllerNumber=1 scan=7287	21.4198
09259:2	1	S.M[+15.995]PLPPHPG.H		M[+16]	431.221	2	861.434	861.429	0	5.8	17	Non	442.64	346.89	107.97	4.28	1509	>sp|P02817|AMELX_BOVIN Amelogenin, X isoform OS=Bos taurus OX=9913 GN=AMELX PE=1 SV=2	1	hf1_10472_ebo_36_1_261219.ScanId;v=1;d1=8619.8619.2	controllerType=0 controllerNumber=1 scan=8619	23.8476
07660:2	1	S.M[+15.995]PLPPHPG.H		M[+16]	431.22	2	861.434	861.429	0	5.6	17	Non	446.34	379.11	97.51	5.14	1509	>sp|P02817|AMELX_BOVIN Amelogenin, X isoform OS=Bos taurus OX=9913 GN=AMELX PE=1 SV=2	1	hf1_10472_ebo_36_1_261219.ScanId;v=1;d1=7478.7478.2	controllerType=0 controllerNumber=1 scan=7478	21.7707
08694:2	1	S.M[+15.995]PLPPHPG.H		M[+16]	431.221	2	861.435	861.429	0	7	17	Non	449.64	375.46	98.45	5.07	1509	>sp|P02817|AMELX_BOVIN Amelogenin, X isoform OS=Bos taurus OX=9913 GN=AMELX PE=1 SV=2	1	hf1_10472_ebo_36_1_261219.ScanId;v=1;d1=8232.8232.2	controllerType=0 controllerNumber=1 scan=8232	23.1502
08439:2	1	S.M[+15.995]PLPPHPG.H		M[+16]	431.221	2	861.434	861.429	0	5.8	17	Non	455.85	376.5	101.43	5.14	1509	>sp|P02817|AMELX_BOVIN Amelogenin, X isoform OS=Bos taurus OX=9913 GN=AMELX PE=1 SV=2	1	hf1_10472_ebo_36_1_261219.ScanId;v=1;d1=8043.8043.2	controllerType=0 controllerNumber=1 scan=8043	22.8131
08970:2	1	S.M[+15.995]PLPPHPG.H		M[+16]	431.221	2	861.435	861.429	0	6.9	17	Non	456.56	351.03	99.71	4.15	1509	>sp|P02817|AMELX_BOVIN Amelogenin, X isoform OS=Bos taurus OX=9913 GN=AMELX PE=1 SV=2	1	hf1_10472_ebo_36_1_261219.ScanId;v=1;d1=8423.8423.2	controllerType=0 controllerNumber=1 scan=8423	23.495
07919:2	1	S.M[+15.995]PLPPHPG.H		M[+16]	431.22	2	861.433	861.429	0	5.3	17	Non	456.85	354.2	100.47	4.28	1509	>sp|P02817|AMELX_BOVIN Amelogenin, X isoform OS=Bos taurus OX=9913 GN=AMELX PE=1 SV=2	1	hf1_10472_ebo_36_1_261219.ScanId;v=1;d1=7664.7664.2	controllerType=0 controllerNumber=1 scan=7664	22.1216
08172:2	1	S.M[+15.995]PLPPHPG.H		M[+16]	431.221	2	861.434	861.429	0	6.3	17	Non	463.77	394.72	119.9	5.15	1509	>sp|P02817|AMELX_BOVIN Amelogenin, X isoform OS=Bos taurus OX=9913 GN=AMELX PE=1 SV=2	1	hf1_10472_ebo_36_1_261219.ScanId;v=1;d1=7848.7848.2	controllerType=0 controllerNumber=1 scan=7848	22.4614
07138:2	1	S.M[+15.995]PLPPHPG.H		M[+16]	431.22	2	861.433	861.429	0	5.6	17	Non	475.45	403.98	119.35	5.23	1509	>sp|P02817|AMELX_BOVIN Amelogenin, X isoform OS=Bos taurus OX=9913 GN=AMELX PE=1 SV=2	1	hf1_10472_ebo_36_1_261219.ScanId;v=1;d1=7102.7102.2	controllerType=0 controllerNumber=1 scan=7102	21.084
10560:2	1	S.M[+15.995]P[+15.995]LPPHPG.H		M[+16], P[+16]	439.218	2	877.428	877.424	0	5.4	17	Non	204.01	135.57	1.5	0.88	1509	>sp|P02817|AMELX_BOVIN Amelogenin, X isoform OS=Bos taurus OX=9913 GN=AMELX PE=1 SV=2	1	hf1_10472_ebo_36_1_261219.ScanId;v=1;d1=9505.9505.3	controllerType=0 controllerNumber=1 scan=9505	25.4578
04337:2	1	S.M[+15.995]PLP[+15.995]PHPG.H		M[+16], P[+16]	439.218	2	877.428	877.424	0	5.4	17	Non	208.23	99.8	14.73	2.2	1509	>sp|P02817|AMELX_BOVIN Amelogenin, X isoform OS=Bos taurus OX=9913 GN=AMELX PE=1 SV=2	1	hf1_10472_ebo_36_1_261219.ScanId;v=1;d1=5096.5096.2	controllerType=0 controllerNumber=1 scan=5096	17.474
05698:2	1	S.M[+15.995]PLPPH[+15.995]PG.H		H[+16], M[+16]	439.218	2	877.429	877.424	0	5.8	17	Non	208.26	69.43	5.87	1.16	1509	>sp|P02817|AMELX_BOVIN Amelogenin, X isoform OS=Bos taurus OX=9913 GN=AMELX PE=1 SV=2	1	hf1_10472_ebo_36_1_261219.ScanId;v=1;d1=6065.6065.2	controllerType=0 controllerNumber=1 scan=6065	19.2175
07581:2	1	S.M[+15.995]PLPP[+15.995]HPG.H		M[+16], P[+16]	439.217	2	877.428	877.424	0	4.6	17	Non	210.48	56.26	2.09	0.63	1509	>sp|P02817|AMELX_BOVIN Amelogenin, X isoform OS=Bos taurus OX=9913 GN=AMELX PE=1 SV=2	1	hf1_10472_ebo_36_1_261219.ScanId;v=1;d1=7418.7418.3	controllerType=0 controllerNumber=1 scan=7418	21.6618
07312:2	1	S.M[+15.995]PLPPH[+15.995]PG.H		H[+16], M[+16]	439.217	2	877.428	877.424	0	4.5	17	Non	216.56	73.65	3.64	0.63	1509	>sp|P02817|AMELX_BOVIN Amelogenin, X isoform OS=Bos taurus OX=9913 GN=AMELX PE=1 SV=2	1	hf1_10472_ebo_36_1_261219.ScanId;v=1;d1=7230.7230.3	controllerType=0 controllerNumber=1 scan=7230	21.3134
05481:2	1	S.M[+15.995]PLPPH[+15.995]PG.H		H[+16], M[+16]	439.218	2	877.428	877.424	0	4.8	17	Non	253.76	111.88	2.18	2.26	1509	>sp|P02817|AMELX_BOVIN Amelogenin, X isoform OS=Bos taurus OX=9913 GN=AMELX PE=1 SV=2	1	hf1_10472_ebo_36_1_261219.ScanId;v=1;d1=5915.5915.3	controllerType=0 controllerNumber=1 scan=5915	18.9545
05214:2	1	S.M[+15.995]PLPP[+15.995]HPG.H		M[+16], P[+16]	439.218	2	877.428	877.424	0	5.4	17	Non	300.55	210.32	1.61	3.03	1509	>sp|P02817|AMELX_BOVIN Amelogenin, X isoform OS=Bos taurus OX=9913 GN=AMELX PE=1 SV=2	1	hf1_10472_ebo_36_1_261219.ScanId;v=1;d1=5726.5726.2	controllerType=0 controllerNumber=1 scan=5726	18.6154
06927:2	1	S.M[+15.995]PLPP[+15.995]HPG.H		M[+16], P[+16]	439.218	2	877.428	877.424	0	5.3	17	Non	331.6	182.39	6	3.41	1509	>sp|P02817|AMELX_BOVIN Amelogenin, X isoform OS=Bos taurus OX=9913 GN=AMELX PE=1 SV=2	1	hf1_10472_ebo_36_1_261219.ScanId;v=1;d1=6948.6948.2	controllerType=0 controllerNumber=1 scan=6948	20.8027
08778:2	1	S.MPLPPHPGH.P			491.754	2	982.501	982.493	0	8	17	Non	360.9	321.55	321.55	4.13	1509	>sp|P02817|AMELX_BOVIN Amelogenin, X isoform OS=Bos taurus OX=9913 GN=AMELX PE=1 SV=2	1	hf1_10472_ebo_36_1_261219.ScanId;v=1;d1=8290.8290.2	controllerType=0 controllerNumber=1 scan=8290	23.2527
09687:2	1	S.MPLPPHPGH.P			491.753	2	982.499	982.493	0	6.5	17	Non	377.2	349.52	349.52	4.13	1509	>sp|P02817|AMELX_BOVIN Amelogenin, X isoform OS=Bos taurus OX=9913 GN=AMELX PE=1 SV=2	1	hf1_10472_ebo_36_1_261219.ScanId;v=1;d1=8916.8916.2	controllerType=0 controllerNumber=1 scan=8916	24.3878
09024:2	1	S.MPLPPHPGH.P			491.753	2	982.499	982.493	0	6.3	17	Non	388.49	305.82	305.82	4.06	1509	>sp|P02817|AMELX_BOVIN Amelogenin, X isoform OS=Bos taurus OX=9913 GN=AMELX PE=1 SV=2	1	hf1_10472_ebo_36_1_261219.ScanId;v=1;d1=8462.8462.2	controllerType=0 controllerNumber=1 scan=8462	23.5673
09859:2	1	S.MPLPPHPGH.P			491.753	2	982.499	982.493	0	6.2	17	Non	429.32	404.3	404.3	5.08	1509	>sp|P02817|AMELX_BOVIN Amelogenin, X isoform OS=Bos taurus OX=9913 GN=AMELX PE=1 SV=2	1	hf1_10472_ebo_36_1_261219.ScanId;v=1;d1=9026.9026.2	controllerType=0 controllerNumber=1 scan=9026	24.5881
09058:2	1	S.MPLPPHPGH.P			491.753	2	982.499	982.493	0	6	17	Non	475.78	436.33	436.33	5.32	1509	>sp|P02817|AMELX_BOVIN Amelogenin, X isoform OS=Bos taurus OX=9913 GN=AMELX PE=1 SV=2	1	hf1_10472_ebo_36_1_261219.ScanId;v=1;d1=8485.8485.2	controllerType=0 controllerNumber=1 scan=8485	23.61
09351:2	1	S.MPLPPHPGH.P			491.753	2	982.499	982.493	0	6.2	17	Non	513.79	452.95	452.95	5.51	1509	>sp|P02817|AMELX_BOVIN Amelogenin, X isoform OS=Bos taurus OX=9913 GN=AMELX PE=1 SV=2	1	hf1_10472_ebo_36_1_261219.ScanId;v=1;d1=8683.8683.2	controllerType=0 controllerNumber=1 scan=8683	23.9618
04070:2	1	S.M[+15.995]PLPPHPGH.P		M[+16]	499.751	2	998.495	998.488	0	7	17	Non	355.38	348.03	65.15	4.08	1509	>sp|P02817|AMELX_BOVIN Amelogenin, X isoform OS=Bos taurus OX=9913 GN=AMELX PE=1 SV=2	1	hf1_10472_ebo_36_1_261219.ScanId;v=1;d1=4905.4905.2	controllerType=0 controllerNumber=1 scan=4905	17.128
06118:2	1	S.M[+15.995]PLPPHPGH.P		M[+16]	499.75	2	998.493	998.488	0	5.3	17	Non	399.88	347.23	48.3	4.49	1509	>sp|P02817|AMELX_BOVIN Amelogenin, X isoform OS=Bos taurus OX=9913 GN=AMELX PE=1 SV=2	1	hf1_10472_ebo_36_1_261219.ScanId;v=1;d1=6367.6367.2	controllerType=0 controllerNumber=1 scan=6367	19.7644
05674:2	1	S.M[+15.995]PLPPHPGH.P		M[+16]	499.75	2	998.493	998.488	0	5.2	17	Non	420.94	397.2	68.03	5.3	1509	>sp|P02817|AMELX_BOVIN Amelogenin, X isoform OS=Bos taurus OX=9913 GN=AMELX PE=1 SV=2	1	hf1_10472_ebo_36_1_261219.ScanId;v=1;d1=6049.6049.2	controllerType=0 controllerNumber=1 scan=6049	19.1919
05403:2	1	S.M[+15.995]PLPPHPGH.P		M[+16]	499.75	2	998.492	998.488	0	4.5	17	Non	517.64	461.31	93.89	5.51	1509	>sp|P02817|AMELX_BOVIN Amelogenin, X isoform OS=Bos taurus OX=9913 GN=AMELX PE=1 SV=2	1	hf1_10472_ebo_36_1_261219.ScanId;v=1;d1=5860.5860.2	controllerType=0 controllerNumber=1 scan=5860	18.8528
04334:2	1	S.M[+15.995]PLPPHPGH.P		M[+16]	499.75	2	998.493	998.488	0	5.7	17	Non	545.22	404.86	120.6	6.13	1509	>sp|P02817|AMELX_BOVIN Amelogenin, X isoform OS=Bos taurus OX=9913 GN=AMELX PE=1 SV=2	1	hf1_10472_ebo_36_1_261219.ScanId;v=1;d1=5094.5094.2	controllerType=0 controllerNumber=1 scan=5094	17.4718
04892:2	1	S.M[+15.995]PLPPHPGH.P		M[+16]	499.75	2	998.492	998.488	0	4.3	17	Non	547.36	444.62	115.45	6.13	1509	>sp|P02817|AMELX_BOVIN Amelogenin, X isoform OS=Bos taurus OX=9913 GN=AMELX PE=1 SV=2	1	hf1_10472_ebo_36_1_261219.ScanId;v=1;d1=5485.5485.2	controllerType=0 controllerNumber=1 scan=5485	18.171
05142:2	1	S.M[+15.995]PLPPHPGH.P		M[+16]	499.75	2	998.493	998.488	0	5	17	Non	558.08	492.44	119.9	6.13	1509	>sp|P02817|AMELX_BOVIN Amelogenin, X isoform OS=Bos taurus OX=9913 GN=AMELX PE=1 SV=2	1	hf1_10472_ebo_36_1_261219.ScanId;v=1;d1=5671.5671.2	controllerType=0 controllerNumber=1 scan=5671	18.5167
04626:2	1	S.M[+15.995]PLPPHPGH.P		M[+16]	499.75	2	998.494	998.488	0	5.9	17	Non	563.94	504.7	119.87	6.93	1509	>sp|P02817|AMELX_BOVIN Amelogenin, X isoform OS=Bos taurus OX=9913 GN=AMELX PE=1 SV=2	1	hf1_10472_ebo_36_1_261219.ScanId;v=1;d1=5294.5294.2	controllerType=0 controllerNumber=1 scan=5294	17.8222
11044:2	1	S.MPLPPHPGHP.G			540.278	2	1079.55	1079.55	0	3.7	17	Non	379.12	283.93	283.93	3.91	1509	>sp|P02817|AMELX_BOVIN Amelogenin, X isoform OS=Bos taurus OX=9913 GN=AMELX PE=1 SV=2	1	hf1_10472_ebo_36_1_261219.ScanId;v=1;d1=9829.9829.2	controllerType=0 controllerNumber=1 scan=9829	26.0476
10397:2	1	S.MPLPPHPGHP.G			540.279	2	1079.55	1079.55	0	5.7	17	Non	528.52	418.58	418.58	6.01	1509	>sp|P02817|AMELX_BOVIN Amelogenin, X isoform OS=Bos taurus OX=9913 GN=AMELX PE=1 SV=2	1	hf1_10472_ebo_36_1_261219.ScanId;v=1;d1=9395.9395.2	controllerType=0 controllerNumber=1 scan=9395	25.2581
07639:2	1	S.M[+15.995]PLPPHPGHP.G		M[+16]	548.277	2	1095.55	1095.54	0	6.2	17	Non	143.34	143.34	11.26	2.2	1509	>sp|P02817|AMELX_BOVIN Amelogenin, X isoform OS=Bos taurus OX=9913 GN=AMELX PE=1 SV=2	1	hf1_10472_ebo_36_1_261219.ScanId;v=1;d1=7463.7463.2	controllerType=0 controllerNumber=1 scan=7463	21.7432
08089:2	1	S.M[+15.995]PLPPHPGHP.G		M[+16]	548.277	2	1095.55	1095.54	0	4.8	17	Non	176.15	176.15	21.61	2.58	1509	>sp|P02817|AMELX_BOVIN Amelogenin, X isoform OS=Bos taurus OX=9913 GN=AMELX PE=1 SV=2	1	hf1_10472_ebo_36_1_261219.ScanId;v=1;d1=7787.7787.2	controllerType=0 controllerNumber=1 scan=7787	22.3434
05827:2	1	S.M[+15.995]PLPPHPGHP.G		M[+16]	548.277	2	1095.55	1095.54	0	5.3	17	Non	189.14	189.14	13.05	2.91	1509	>sp|P02817|AMELX_BOVIN Amelogenin, X isoform OS=Bos taurus OX=9913 GN=AMELX PE=1 SV=2	1	hf1_10472_ebo_36_1_261219.ScanId;v=1;d1=6165.6165.3	controllerType=0 controllerNumber=1 scan=6165	19.4022
07892:2	1	S.M[+15.995]PLPPHPGHP.G		M[+16]	548.276	2	1095.54	1095.54	0	3.5	17	Non	189.79	189.79	12.2	2.35	1509	>sp|P02817|AMELX_BOVIN Amelogenin, X isoform OS=Bos taurus OX=9913 GN=AMELX PE=1 SV=2	1	hf1_10472_ebo_36_1_261219.ScanId;v=1;d1=7644.7644.3	controllerType=0 controllerNumber=1 scan=7644	22.0835
06107:2	1	S.M[+15.995]PLPPHPGHP.G		M[+16]	548.277	2	1095.55	1095.54	0	5.9	17	Non	194.65	147.24	15.5	2.33	1509	>sp|P02817|AMELX_BOVIN Amelogenin, X isoform OS=Bos taurus OX=9913 GN=AMELX PE=1 SV=2	1	hf1_10472_ebo_36_1_261219.ScanId;v=1;d1=6359.6359.3	controllerType=0 controllerNumber=1 scan=6359	19.751
07725:2	1	S.M[+15.995]PLPPHPGHP.G		M[+16]	548.277	2	1095.55	1095.54	0	5.6	17	Non	211.69	200.96	5.36	2.61	1509	>sp|P02817|AMELX_BOVIN Amelogenin, X isoform OS=Bos taurus OX=9913 GN=AMELX PE=1 SV=2	1	hf1_10472_ebo_36_1_261219.ScanId;v=1;d1=7523.7523.2	controllerType=0 controllerNumber=1 scan=7523	21.8533
07244:2	1	S.M[+15.995]PLPPHPGHP.G		M[+16]	548.276	2	1095.55	1095.54	0	4.3	17	Non	499.12	328.05	55.13	4.98	1509	>sp|P02817|AMELX_BOVIN Amelogenin, X isoform OS=Bos taurus OX=9913 GN=AMELX PE=1 SV=2	1	hf1_10472_ebo_36_1_261219.ScanId;v=1;d1=7180.7180.2	controllerType=0 controllerNumber=1 scan=7180	21.2226
06971:2	1	S.M[+15.995]PLPPHPGHP.G		M[+16]	548.277	2	1095.55	1095.54	0	6.3	17	Non	542.54	334.65	60.01	5.64	1509	>sp|P02817|AMELX_BOVIN Amelogenin, X isoform OS=Bos taurus OX=9913 GN=AMELX PE=1 SV=2	1	hf1_10472_ebo_36_1_261219.ScanId;v=1;d1=6980.6980.2	controllerType=0 controllerNumber=1 scan=6980	20.8638
06167:2	1	S.M[+15.995]PLPPHPGHP.G		M[+16]	548.277	2	1095.55	1095.54	0	6.1	17	Non	552.91	386.69	75.95	6.5	1509	>sp|P02817|AMELX_BOVIN Amelogenin, X isoform OS=Bos taurus OX=9913 GN=AMELX PE=1 SV=2	1	hf1_10472_ebo_36_1_261219.ScanId;v=1;d1=6402.6402.2	controllerType=0 controllerNumber=1 scan=6402	19.8315
06437:2	1	S.M[+15.995]PLPPHPGHP.G		M[+16]	548.277	2	1095.55	1095.54	0	6.2	17	Non	614.99	404.88	81.5	7.8	1509	>sp|P02817|AMELX_BOVIN Amelogenin, X isoform OS=Bos taurus OX=9913 GN=AMELX PE=1 SV=2	1	hf1_10472_ebo_36_1_261219.ScanId;v=1;d1=6598.6598.2	controllerType=0 controllerNumber=1 scan=6598	20.179
06707:2	1	S.M[+15.995]PLPPHPGHP.G		M[+16]	548.277	2	1095.55	1095.54	0	5.4	17	Non	616.04	401.06	86.96	8.3	1509	>sp|P02817|AMELX_BOVIN Amelogenin, X isoform OS=Bos taurus OX=9913 GN=AMELX PE=1 SV=2	1	hf1_10472_ebo_36_1_261219.ScanId;v=1;d1=6788.6788.2	controllerType=0 controllerNumber=1 scan=6788	20.5157
10719:3	1	S.MPLPPHPGHPG.Y			379.529	3	1136.57	1136.57	0	5.5	17	Non	294.42	249.89	249.89	4.06	1509	>sp|P02817|AMELX_BOVIN Amelogenin, X isoform OS=Bos taurus OX=9913 GN=AMELX PE=1 SV=2	1	hf1_10472_ebo_36_1_261219.ScanId;v=1;d1=9606.9606.3	controllerType=0 controllerNumber=1 scan=9606	25.6399
09017:3	1	S.MPLPPHPGHPG.Y			379.53	3	1136.57	1136.57	0	6.4	17	Non	438.92	340.29	340.29	5.13	1509	>sp|P02817|AMELX_BOVIN Amelogenin, X isoform OS=Bos taurus OX=9913 GN=AMELX PE=1 SV=2	1	hf1_10472_ebo_36_1_261219.ScanId;v=1;d1=8457.8457.3	controllerType=0 controllerNumber=1 scan=8457	23.5598
10420:3	1	S.MPLPPHPGHPG.Y			379.529	3	1136.57	1136.57	0	5.2	17	Non	452.16	423.21	423.21	5.59	1509	>sp|P02817|AMELX_BOVIN Amelogenin, X isoform OS=Bos taurus OX=9913 GN=AMELX PE=1 SV=2	1	hf1_10472_ebo_36_1_261219.ScanId;v=1;d1=9410.9410.3	controllerType=0 controllerNumber=1 scan=9410	25.286
10129:3	1	S.MPLPPHPGHPG.Y			379.529	3	1136.57	1136.57	0	5.8	17	Non	484.49	380.75	380.75	6.13	1509	>sp|P02817|AMELX_BOVIN Amelogenin, X isoform OS=Bos taurus OX=9913 GN=AMELX PE=1 SV=2	1	hf1_10472_ebo_36_1_261219.ScanId;v=1;d1=9214.9214.3	controllerType=0 controllerNumber=1 scan=9214	24.9353
09865:3	1	S.MPLPPHPGHPG.Y			379.529	3	1136.57	1136.57	0	5.3	17	Non	492.58	420.78	420.78	6.13	1509	>sp|P02817|AMELX_BOVIN Amelogenin, X isoform OS=Bos taurus OX=9913 GN=AMELX PE=1 SV=2	1	hf1_10472_ebo_36_1_261219.ScanId;v=1;d1=9031.9031.3	controllerType=0 controllerNumber=1 scan=9031	24.5984
09309:3	1	S.MPLPPHPGHPG.Y			379.529	3	1136.57	1136.57	0	5.8	17	Non	512.02	422.86	422.86	6.13	1509	>sp|P02817|AMELX_BOVIN Amelogenin, X isoform OS=Bos taurus OX=9913 GN=AMELX PE=1 SV=2	1	hf1_10472_ebo_36_1_261219.ScanId;v=1;d1=8652.8652.3	controllerType=0 controllerNumber=1 scan=8652	23.9051
09582:3	1	S.MPLPPHPGHPG.Y			379.529	3	1136.57	1136.57	0	5.4	17	Non	513.65	398.05	398.05	6.13	1509	>sp|P02817|AMELX_BOVIN Amelogenin, X isoform OS=Bos taurus OX=9913 GN=AMELX PE=1 SV=2	1	hf1_10472_ebo_36_1_261219.ScanId;v=1;d1=8841.8841.3	controllerType=0 controllerNumber=1 scan=8841	24.2503
09341:2	1	S.MPLPPHPGHPG.Y			568.79	2	1136.57	1136.57	0	6	17	Non	610.58	442.53	442.53	8.3	1509	>sp|P02817|AMELX_BOVIN Amelogenin, X isoform OS=Bos taurus OX=9913 GN=AMELX PE=1 SV=2	1	hf1_10472_ebo_36_1_261219.ScanId;v=1;d1=8677.8677.2	controllerType=0 controllerNumber=1 scan=8677	23.9532
45513:3	1	S.MP[+15.995]LPPHPGHPG.Y		P[+16]	384.861	3	1152.57	1152.56	0	5	17	Non	35.57	35.57	4	1.98	1509	>sp|P02817|AMELX_BOVIN Amelogenin, X isoform OS=Bos taurus OX=9913 GN=AMELX PE=1 SV=2	1	hf1_10472_ebo_36_1_261219.ScanId;v=1;d1=34427.34427.3	controllerType=0 controllerNumber=1 scan=34427	77.4548
45473:3	1	S.MP[+15.995]LPPHPGHPG.Y		P[+16]	384.861	3	1152.57	1152.56	0	4.3	17	Non	42.72	42.72	4	2.22	1509	>sp|P02817|AMELX_BOVIN Amelogenin, X isoform OS=Bos taurus OX=9913 GN=AMELX PE=1 SV=2	1	hf1_10472_ebo_36_1_261219.ScanId;v=1;d1=34299.34299.3	controllerType=0 controllerNumber=1 scan=34299	76.7784
45494:3	1	S.MP[+15.995]LPPHPGHPG.Y		P[+16]	384.861	3	1152.57	1152.56	0	4.5	17	Non	73.06	73.06	4	2.22	1509	>sp|P02817|AMELX_BOVIN Amelogenin, X isoform OS=Bos taurus OX=9913 GN=AMELX PE=1 SV=2	1	hf1_10472_ebo_36_1_261219.ScanId;v=1;d1=34363.34363.3	controllerType=0 controllerNumber=1 scan=34363	77.1141
09424:3	1	S.M[+15.995]PLPPHPGHPG.Y		M[+16]	384.861	3	1152.57	1152.56	0	5	17	Non	215.89	134.55	8.68	2.23	1509	>sp|P02817|AMELX_BOVIN Amelogenin, X isoform OS=Bos taurus OX=9913 GN=AMELX PE=1 SV=2	1	hf1_10472_ebo_36_1_261219.ScanId;v=1;d1=8736.8736.3	controllerType=0 controllerNumber=1 scan=8736	24.0576
08317:3	1	S.M[+15.995]PLPPHPGHPG.Y		M[+16]	384.861	3	1152.57	1152.56	0	4.7	17	Non	262.08	261.51	17.48	3.96	1509	>sp|P02817|AMELX_BOVIN Amelogenin, X isoform OS=Bos taurus OX=9913 GN=AMELX PE=1 SV=2	1	hf1_10472_ebo_36_1_261219.ScanId;v=1;d1=7954.7954.3	controllerType=0 controllerNumber=1 scan=7954	22.6534
08853:3	1	S.M[+15.995]PLPPHPGHPG.Y		M[+16]	384.861	3	1152.57	1152.56	0	5.8	17	Non	262.09	202.72	18.21	3.71	1509	>sp|P02817|AMELX_BOVIN Amelogenin, X isoform OS=Bos taurus OX=9913 GN=AMELX PE=1 SV=2	1	hf1_10472_ebo_36_1_261219.ScanId;v=1;d1=8343.8343.3	controllerType=0 controllerNumber=1 scan=8343	23.3486
06959:3	1	S.M[+31.990]PLPPHPGHPG.Y		M[+32]	390.193	3	1168.57	1168.56	0	7	17	Non	265.59	260.15	10.33	3.88	1509	>sp|P02817|AMELX_BOVIN Amelogenin, X isoform OS=Bos taurus OX=9913 GN=AMELX PE=1 SV=2	1	hf1_10472_ebo_36_1_261219.ScanId;v=1;d1=6971.6971.3	controllerType=0 controllerNumber=1 scan=6971	20.8476
06157:3	1	S.M[+31.990]PLPPHPGHPG.Y		M[+32]	390.193	3	1168.56	1168.56	0	5.6	17	Non	267.02	261.43	0	3.96	1509	>sp|P02817|AMELX_BOVIN Amelogenin, X isoform OS=Bos taurus OX=9913 GN=AMELX PE=1 SV=2	1	hf1_10472_ebo_36_1_261219.ScanId;v=1;d1=6396.6396.3	controllerType=0 controllerNumber=1 scan=6396	19.8205
08619:3	1	S.M[+15.995]PLPPHPGHPG.Y		M[+16]	384.861	3	1152.57	1152.56	0	6.7	17	Non	291.17	172.36	24.78	3.68	1509	>sp|P02817|AMELX_BOVIN Amelogenin, X isoform OS=Bos taurus OX=9913 GN=AMELX PE=1 SV=2	1	hf1_10472_ebo_36_1_261219.ScanId;v=1;d1=8175.8175.3	controllerType=0 controllerNumber=1 scan=8175	23.0491
08053:3	1	S.M[+15.995]PLPPHPGHPG.Y		M[+16]	384.861	3	1152.57	1152.56	0	5.8	17	Non	302.54	249.91	23.58	4.28	1509	>sp|P02817|AMELX_BOVIN Amelogenin, X isoform OS=Bos taurus OX=9913 GN=AMELX PE=1 SV=2	1	hf1_10472_ebo_36_1_261219.ScanId;v=1;d1=7762.7762.3	controllerType=0 controllerNumber=1 scan=7762	22.3017
06988:3	1	S.M[+31.990]PLPPHPGHPG.Y		M[+32]	390.193	3	1168.56	1168.56	0	6.8	17	Non	302.86	251.15	11.35	4.2	1509	>sp|P02817|AMELX_BOVIN Amelogenin, X isoform OS=Bos taurus OX=9913 GN=AMELX PE=1 SV=2	1	hf1_10472_ebo_36_1_261219.ScanId;v=1;d1=6992.6992.3	controllerType=0 controllerNumber=1 scan=6992	20.884
00049:3	1	S.M[+15.995]PLPPHPGHPG.Y		M[+16]	384.861	3	1152.57	1152.56	0	6.3	17	Non	311.69	295.11	13.86	4.91	1509	>sp|P02817|AMELX_BOVIN Amelogenin, X isoform OS=Bos taurus OX=9913 GN=AMELX PE=1 SV=2	1	hf1_10472_ebo_36_1_261219.ScanId;v=1;d1=583.583.3	controllerType=0 controllerNumber=1 scan=583	3.3166
07256:3	1	S.M[+31.990]PLPPHPGHPG.Y		M[+32]	390.192	3	1168.56	1168.56	0	5.2	17	Non	315.98	304.58	13.35	4.35	1509	>sp|P02817|AMELX_BOVIN Amelogenin, X isoform OS=Bos taurus OX=9913 GN=AMELX PE=1 SV=2	1	hf1_10472_ebo_36_1_261219.ScanId;v=1;d1=7189.7189.2	controllerType=0 controllerNumber=1 scan=7189	21.2387
06430:3	1	S.M[+31.990]PLPPHPGHPG.Y		M[+32]	390.193	3	1168.57	1168.56	0	7.4	17	Non	353.69	317.8	13.28	4.28	1509	>sp|P02817|AMELX_BOVIN Amelogenin, X isoform OS=Bos taurus OX=9913 GN=AMELX PE=1 SV=2	1	hf1_10472_ebo_36_1_261219.ScanId;v=1;d1=6591.6591.3	controllerType=0 controllerNumber=1 scan=6591	20.1657
45229:3	1	S.M[+15.995]PLPPHPGHPG.Y		M[+16]	384.861	3	1152.57	1152.56	0	5.5	17	Non	361.27	318.39	34.66	4.55	1509	>sp|P02817|AMELX_BOVIN Amelogenin, X isoform OS=Bos taurus OX=9913 GN=AMELX PE=1 SV=2	1	hf1_10472_ebo_36_1_261219.ScanId;v=1;d1=33650.33650.3	controllerType=0 controllerNumber=1 scan=33650	73.4906
07420:3	1	S.M[+15.995]PLPPHPGHPG.Y		M[+16]	384.861	3	1152.57	1152.56	0	4.7	17	Non	361.92	306.53	31.74	4.47	1509	>sp|P02817|AMELX_BOVIN Amelogenin, X isoform OS=Bos taurus OX=9913 GN=AMELX PE=1 SV=2	1	hf1_10472_ebo_36_1_261219.ScanId;v=1;d1=7302.7302.3	controllerType=0 controllerNumber=1 scan=7302	21.4469
06708:3	1	S.M[+31.990]PLPPHPGHPG.Y		M[+32]	390.193	3	1168.56	1168.56	0	6.2	17	Non	368.91	319.26	12.67	4.55	1509	>sp|P02817|AMELX_BOVIN Amelogenin, X isoform OS=Bos taurus OX=9913 GN=AMELX PE=1 SV=2	1	hf1_10472_ebo_36_1_261219.ScanId;v=1;d1=6789.6789.3	controllerType=0 controllerNumber=1 scan=6789	20.5172
07681:3	1	S.M[+15.995]PLPPHPGHPG.Y		M[+16]	384.861	3	1152.57	1152.56	0	4.9	17	Non	395.1	329.61	31.18	4.7	1509	>sp|P02817|AMELX_BOVIN Amelogenin, X isoform OS=Bos taurus OX=9913 GN=AMELX PE=1 SV=2	1	hf1_10472_ebo_36_1_261219.ScanId;v=1;d1=7493.7493.3	controllerType=0 controllerNumber=1 scan=7493	21.7981
05532:3	1	S.M[+15.995]PLPPHPGHPG.Y		M[+16]	384.861	3	1152.57	1152.56	0	6.4	17	Non	419.84	360.23	38.64	5.99	1509	>sp|P02817|AMELX_BOVIN Amelogenin, X isoform OS=Bos taurus OX=9913 GN=AMELX PE=1 SV=2	1	hf1_10472_ebo_36_1_261219.ScanId;v=1;d1=5950.5950.3	controllerType=0 controllerNumber=1 scan=5950	19.0165
06895:3	1	S.M[+15.995]PLPPHPGHPG.Y		M[+16]	384.861	3	1152.57	1152.56	0	5.5	17	Non	430.09	375.96	33.33	6.07	1509	>sp|P02817|AMELX_BOVIN Amelogenin, X isoform OS=Bos taurus OX=9913 GN=AMELX PE=1 SV=2	1	hf1_10472_ebo_36_1_261219.ScanId;v=1;d1=6919.6919.3	controllerType=0 controllerNumber=1 scan=6919	20.7489
05013:3	1	S.M[+15.995]PLPPHPGHPG.Y		M[+16]	384.861	3	1152.57	1152.56	0	4.6	17	Non	436.07	382.98	32.64	6.07	1509	>sp|P02817|AMELX_BOVIN Amelogenin, X isoform OS=Bos taurus OX=9913 GN=AMELX PE=1 SV=2	1	hf1_10472_ebo_36_1_261219.ScanId;v=1;d1=5572.5572.3	controllerType=0 controllerNumber=1 scan=5572	18.3332
07151:3	1	S.M[+15.995]PLPPHPGHPG.Y		M[+16]	384.861	3	1152.57	1152.56	0	4.5	17	Non	473.38	418	42.66	6.09	1509	>sp|P02817|AMELX_BOVIN Amelogenin, X isoform OS=Bos taurus OX=9913 GN=AMELX PE=1 SV=2	1	hf1_10472_ebo_36_1_261219.ScanId;v=1;d1=7113.7113.3	controllerType=0 controllerNumber=1 scan=7113	21.1027
06076:3	1	S.M[+15.995]PLPPHPGHPG.Y		M[+16]	384.861	3	1152.57	1152.56	0	6.4	17	Non	482.29	435.27	44.59	6.05	1509	>sp|P02817|AMELX_BOVIN Amelogenin, X isoform OS=Bos taurus OX=9913 GN=AMELX PE=1 SV=2	1	hf1_10472_ebo_36_1_261219.ScanId;v=1;d1=6337.6337.3	controllerType=0 controllerNumber=1 scan=6337	19.711
06608:3	1	S.M[+15.995]PLPPHPGHPG.Y		M[+16]	384.861	3	1152.57	1152.56	0	5.9	17	Non	491.55	425.81	46.51	6.13	1509	>sp|P02817|AMELX_BOVIN Amelogenin, X isoform OS=Bos taurus OX=9913 GN=AMELX PE=1 SV=2	1	hf1_10472_ebo_36_1_261219.ScanId;v=1;d1=6719.6719.3	controllerType=0 controllerNumber=1 scan=6719	20.3952
05262:3	1	S.M[+15.995]PLPPHPGHPG.Y		M[+16]	384.861	3	1152.57	1152.56	0	6.4	17	Non	496.62	436.64	43.17	6.05	1509	>sp|P02817|AMELX_BOVIN Amelogenin, X isoform OS=Bos taurus OX=9913 GN=AMELX PE=1 SV=2	1	hf1_10472_ebo_36_1_261219.ScanId;v=1;d1=5761.5761.3	controllerType=0 controllerNumber=1 scan=5761	18.6781
06344:3	1	S.M[+15.995]PLPPHPGHPG.Y		M[+16]	384.861	3	1152.57	1152.56	0	5	17	Non	499.93	442.33	37.07	6.13	1509	>sp|P02817|AMELX_BOVIN Amelogenin, X isoform OS=Bos taurus OX=9913 GN=AMELX PE=1 SV=2	1	hf1_10472_ebo_36_1_261219.ScanId;v=1;d1=6529.6529.3	controllerType=0 controllerNumber=1 scan=6529	20.0571
05791:3	1	S.M[+15.995]PLPPHPGHPG.Y		M[+16]	384.861	3	1152.57	1152.56	0	6.5	17	Non	503.03	434.27	47.11	6.05	1509	>sp|P02817|AMELX_BOVIN Amelogenin, X isoform OS=Bos taurus OX=9913 GN=AMELX PE=1 SV=2	1	hf1_10472_ebo_36_1_261219.ScanId;v=1;d1=6139.6139.3	controllerType=0 controllerNumber=1 scan=6139	19.3559
06837:2	1	S.M[+15.995]PLPPHPGHPG.Y		M[+16]	576.788	2	1152.57	1152.56	0	6	17	Non	534.91	385.78	69.12	6.5	1509	>sp|P02817|AMELX_BOVIN Amelogenin, X isoform OS=Bos taurus OX=9913 GN=AMELX PE=1 SV=2	1	hf1_10472_ebo_36_1_261219.ScanId;v=1;d1=6879.6879.2	controllerType=0 controllerNumber=1 scan=6879	20.6772
45248:2	1	S.M[+15.995]PLPPHPGHPG.Y		M[+16]	576.788	2	1152.57	1152.56	0	6.7	17	Non	548.75	435.9	68.88	6.42	1509	>sp|P02817|AMELX_BOVIN Amelogenin, X isoform OS=Bos taurus OX=9913 GN=AMELX PE=1 SV=2	1	hf1_10472_ebo_36_1_261219.ScanId;v=1;d1=33663.33663.2	controllerType=0 controllerNumber=1 scan=33663	73.5131
05217:2	1	S.M[+15.995]PLPPHPGHPG.Y		M[+16]	576.788	2	1152.57	1152.56	0	5.3	17	Non	566.23	509.3	72.91	7.3	1509	>sp|P02817|AMELX_BOVIN Amelogenin, X isoform OS=Bos taurus OX=9913 GN=AMELX PE=1 SV=2	1	hf1_10472_ebo_36_1_261219.ScanId;v=1;d1=5730.5730.2	controllerType=0 controllerNumber=1 scan=5730	18.6241
04969:2	1	S.M[+15.995]PLPPHPGHPG.Y		M[+16]	576.787	2	1152.57	1152.56	0	3.9	17	Non	573.73	555.44	85.94	6.77	1509	>sp|P02817|AMELX_BOVIN Amelogenin, X isoform OS=Bos taurus OX=9913 GN=AMELX PE=1 SV=2	1	hf1_10472_ebo_36_1_261219.ScanId;v=1;d1=5543.5543.2	controllerType=0 controllerNumber=1 scan=5543	18.2811
06558:2	1	S.M[+15.995]PLPPHPGHPG.Y		M[+16]	576.788	2	1152.57	1152.56	0	6	17	Non	575.26	430.68	84.32	6.8	1509	>sp|P02817|AMELX_BOVIN Amelogenin, X isoform OS=Bos taurus OX=9913 GN=AMELX PE=1 SV=2	1	hf1_10472_ebo_36_1_261219.ScanId;v=1;d1=6683.6683.2	controllerType=0 controllerNumber=1 scan=6683	20.3282
06026:2	1	S.M[+15.995]PLPPHPGHPG.Y		M[+16]	576.788	2	1152.57	1152.56	0	5.5	17	Non	609.33	491.65	102.18	8.3	1509	>sp|P02817|AMELX_BOVIN Amelogenin, X isoform OS=Bos taurus OX=9913 GN=AMELX PE=1 SV=2	1	hf1_10472_ebo_36_1_261219.ScanId;v=1;d1=6304.6304.2	controllerType=0 controllerNumber=1 scan=6304	19.6543
06292:2	1	S.M[+15.995]PLPPHPGHPG.Y		M[+16]	576.788	2	1152.57	1152.56	0	5.6	17	Non	618.14	545.64	105.01	8.3	1509	>sp|P02817|AMELX_BOVIN Amelogenin, X isoform OS=Bos taurus OX=9913 GN=AMELX PE=1 SV=2	1	hf1_10472_ebo_36_1_261219.ScanId;v=1;d1=6491.6491.2	controllerType=0 controllerNumber=1 scan=6491	19.9897
05763:2	1	S.M[+15.995]PLPPHPGHPG.Y		M[+16]	576.788	2	1152.57	1152.56	0	5.8	17	Non	627.7	476.08	106.51	8.3	1509	>sp|P02817|AMELX_BOVIN Amelogenin, X isoform OS=Bos taurus OX=9913 GN=AMELX PE=1 SV=2	1	hf1_10472_ebo_36_1_261219.ScanId;v=1;d1=6116.6116.2	controllerType=0 controllerNumber=1 scan=6116	19.312
05499:2	1	S.M[+15.995]PLPPHPGHPG.Y		M[+16]	576.788	2	1152.57	1152.56	0	5	17	Non	638.59	533.06	109.88	8.3	1509	>sp|P02817|AMELX_BOVIN Amelogenin, X isoform OS=Bos taurus OX=9913 GN=AMELX PE=1 SV=2	1	hf1_10472_ebo_36_1_261219.ScanId;v=1;d1=5926.5926.2	controllerType=0 controllerNumber=1 scan=5926	18.973
05916:3	1	S.M[+15.995]PLPPHP[+15.995]GHPG.Y		M[+16], P[+16]	390.192	3	1168.56	1168.56	0	4.2	17	Non	147.24	97.64	0	1.15	1509	>sp|P02817|AMELX_BOVIN Amelogenin, X isoform OS=Bos taurus OX=9913 GN=AMELX PE=1 SV=2	1	hf1_10472_ebo_36_1_261219.ScanId;v=1;d1=6225.6225.3	controllerType=0 controllerNumber=1 scan=6225	19.5104
03507:3	1	S.M[+15.995]PLP[+15.995]PHPGHPG.Y		M[+16], P[+16]	390.193	3	1168.57	1168.56	0	7.2	17	Non	166.76	119.76	24.17	2.21	1509	>sp|P02817|AMELX_BOVIN Amelogenin, X isoform OS=Bos taurus OX=9913 GN=AMELX PE=1 SV=2	1	hf1_10472_ebo_36_1_261219.ScanId;v=1;d1=4509.4509.3	controllerType=0 controllerNumber=1 scan=4509	16.4228
05622:3	1	S.MP[+15.995]LPP[+15.995]HPGHPG.Y		P[+16]*2	390.192	3	1168.56	1168.56	0	4.8	17	Non	172.48	123.19	2.84	2.23	1509	>sp|P02817|AMELX_BOVIN Amelogenin, X isoform OS=Bos taurus OX=9913 GN=AMELX PE=1 SV=2	1	hf1_10472_ebo_36_1_261219.ScanId;v=1;d1=6011.6011.3	controllerType=0 controllerNumber=1 scan=6011	19.1211
05879:3	1	S.M[+15.995]PLPPHPGH[+15.995]PG.Y		H[+16], M[+16]	390.192	3	1168.56	1168.56	0	4	17	Non	172.98	136.7	8.78	2.21	1509	>sp|P02817|AMELX_BOVIN Amelogenin, X isoform OS=Bos taurus OX=9913 GN=AMELX PE=1 SV=2	1	hf1_10472_ebo_36_1_261219.ScanId;v=1;d1=6199.6199.3	controllerType=0 controllerNumber=1 scan=6199	19.4625
09172:2	1	S.M[+15.995]PLP[+15.995]PHPGHPG.Y		M[+16], P[+16]	584.786	2	1168.56	1168.56	0	6.9	17	Non	184.77	114.41	11.72	0.92	1509	>sp|P02817|AMELX_BOVIN Amelogenin, X isoform OS=Bos taurus OX=9913 GN=AMELX PE=1 SV=2	1	hf1_10472_ebo_36_1_261219.ScanId;v=1;d1=8559.8559.2	controllerType=0 controllerNumber=1 scan=8559	23.7399
08488:2	1	S.M[+15.995]PLPPHP[+15.995]GHPG.Y		M[+16], P[+16]	584.783	2	1168.56	1168.56	0	2.1	17	Non	193.01	193.01	0	2.21	1509	>sp|P02817|AMELX_BOVIN Amelogenin, X isoform OS=Bos taurus OX=9913 GN=AMELX PE=1 SV=2	1	hf1_10472_ebo_36_1_261219.ScanId;v=1;d1=8080.8080.2	controllerType=0 controllerNumber=1 scan=8080	22.8772
03688:3	1	S.M[+15.995]PLPPHPGH[+15.995]PG.Y		H[+16], M[+16]	390.193	3	1168.56	1168.56	0	6.4	17	Non	259.3	217.17	3.01	3.63	1509	>sp|P02817|AMELX_BOVIN Amelogenin, X isoform OS=Bos taurus OX=9913 GN=AMELX PE=1 SV=2	1	hf1_10472_ebo_36_1_261219.ScanId;v=1;d1=4636.4636.3	controllerType=0 controllerNumber=1 scan=4636	16.6479
05345:3	1	S.M[+15.995]PLPPHPGH[+15.995]PG.Y		H[+16], M[+16]	390.192	3	1168.56	1168.56	0	5.2	17	Non	269.24	201.93	1.56	3.71	1509	>sp|P02817|AMELX_BOVIN Amelogenin, X isoform OS=Bos taurus OX=9913 GN=AMELX PE=1 SV=2	1	hf1_10472_ebo_36_1_261219.ScanId;v=1;d1=5818.5818.3	controllerType=0 controllerNumber=1 scan=5818	18.7797
03395:3	1	S.M[+15.995]P[+15.995]LPPHPGHPG.Y		M[+16], P[+16]	390.193	3	1168.56	1168.56	0	5.5	17	Non	271.57	229.84	10.52	3.71	1509	>sp|P02817|AMELX_BOVIN Amelogenin, X isoform OS=Bos taurus OX=9913 GN=AMELX PE=1 SV=2	1	hf1_10472_ebo_36_1_261219.ScanId;v=1;d1=4428.4428.3	controllerType=0 controllerNumber=1 scan=4428	16.2846
03843:2	1	S.M[+15.995]PLPPHPGHP[+15.995]G.Y		M[+16], P[+16]	584.786	2	1168.56	1168.56	0	6.4	17	Non	276.21	220.34	46.1	3.86	1509	>sp|P02817|AMELX_BOVIN Amelogenin, X isoform OS=Bos taurus OX=9913 GN=AMELX PE=1 SV=2	1	hf1_10472_ebo_36_1_261219.ScanId;v=1;d1=4745.4745.2	controllerType=0 controllerNumber=1 scan=4745	16.8413
04705:2	1	S.M[+15.995]PLPPHPGHP[+15.995]G.Y		M[+16], P[+16]	584.785	2	1168.56	1168.56	0	5.4	17	Non	284.55	205.21	52.32	4.04	1509	>sp|P02817|AMELX_BOVIN Amelogenin, X isoform OS=Bos taurus OX=9913 GN=AMELX PE=1 SV=2	1	hf1_10472_ebo_36_1_261219.ScanId;v=1;d1=5349.5349.3	controllerType=0 controllerNumber=1 scan=5349	17.92
04834:3	1	S.M[+15.995]PLPPHPGH[+15.995]PG.Y		H[+16], M[+16]	390.192	3	1168.56	1168.56	0	3.9	17	Non	298.63	204.14	1.78	3.3	1509	>sp|P02817|AMELX_BOVIN Amelogenin, X isoform OS=Bos taurus OX=9913 GN=AMELX PE=1 SV=2	1	hf1_10472_ebo_36_1_261219.ScanId;v=1;d1=5441.5441.3	controllerType=0 controllerNumber=1 scan=5441	18.0898
05079:3	1	S.M[+15.995]PLPPHPGH[+15.995]PG.Y		H[+16], M[+16]	390.189	3	1168.55	1168.56	0	-3.3	17	Non	307.22	188.1	1.64	2.88	1509	>sp|P02817|AMELX_BOVIN Amelogenin, X isoform OS=Bos taurus OX=9913 GN=AMELX PE=1 SV=2	1	hf1_10472_ebo_36_1_261219.ScanId;v=1;d1=5623.5623.3	controllerType=0 controllerNumber=1 scan=5623	18.4328
03803:2	1	S.M[+15.995]PLPPHPGHP[+15.995]G.Y		M[+16], P[+16]	584.786	2	1168.57	1168.56	0	7.4	17	Non	338.4	210.36	9.44	3.97	1509	>sp|P02817|AMELX_BOVIN Amelogenin, X isoform OS=Bos taurus OX=9913 GN=AMELX PE=1 SV=2	1	hf1_10472_ebo_36_1_261219.ScanId;v=1;d1=4717.4717.3	controllerType=0 controllerNumber=1 scan=4717	16.79
04124:2	1	S.M[+15.995]PLPPHPGHP[+15.995]G.Y		M[+16], P[+16]	584.786	2	1168.57	1168.56	0	7.3	17	Non	382.82	291.96	54.85	4.57	1509	>sp|P02817|AMELX_BOVIN Amelogenin, X isoform OS=Bos taurus OX=9913 GN=AMELX PE=1 SV=2	1	hf1_10472_ebo_36_1_261219.ScanId;v=1;d1=4944.4944.2	controllerType=0 controllerNumber=1 scan=4944	17.1984
04276:3	1	S.M[+15.995]PLPPHPGHP[+15.995]G.Y		M[+16], P[+16]	390.193	3	1168.56	1168.56	0	6.4	17	Non	388.8	303.98	9.94	4.39	1509	>sp|P02817|AMELX_BOVIN Amelogenin, X isoform OS=Bos taurus OX=9913 GN=AMELX PE=1 SV=2	1	hf1_10472_ebo_36_1_261219.ScanId;v=1;d1=5053.5053.3	controllerType=0 controllerNumber=1 scan=5053	17.3958
04565:3	1	S.M[+15.995]PLPPHPGHP[+15.995]G.Y		M[+16], P[+16]	390.193	3	1168.56	1168.56	0	5.4	17	Non	399.34	351.22	8.3	4.61	1509	>sp|P02817|AMELX_BOVIN Amelogenin, X isoform OS=Bos taurus OX=9913 GN=AMELX PE=1 SV=2	1	hf1_10472_ebo_36_1_261219.ScanId;v=1;d1=5252.5252.3	controllerType=0 controllerNumber=1 scan=5252	17.7494
04399:2	1	S.M[+15.995]PLPPHPGHP[+15.995]G.Y		M[+16], P[+16]	584.785	2	1168.56	1168.56	0	5.2	17	Non	402.95	283.47	57.78	4.66	1509	>sp|P02817|AMELX_BOVIN Amelogenin, X isoform OS=Bos taurus OX=9913 GN=AMELX PE=1 SV=2	1	hf1_10472_ebo_36_1_261219.ScanId;v=1;d1=5138.5138.2	controllerType=0 controllerNumber=1 scan=5138	17.5495
12986:3	1	S.MPLPPHPGHPGY.I			433.884	3	1299.64	1299.63	0	4.8	17	Non	232.69	203.96	203.96	2.76	1509	>sp|P02817|AMELX_BOVIN Amelogenin, X isoform OS=Bos taurus OX=9913 GN=AMELX PE=1 SV=2	1	hf1_10472_ebo_36_1_261219.ScanId;v=1;d1=11206.11206.3	controllerType=0 controllerNumber=1 scan=11206	28.7572
12812:3	1	S.MPLPPHPGHPGY.I			433.884	3	1299.64	1299.63	0	5.9	17	Non	381	328.36	328.36	4.61	1509	>sp|P02817|AMELX_BOVIN Amelogenin, X isoform OS=Bos taurus OX=9913 GN=AMELX PE=1 SV=2	1	hf1_10472_ebo_36_1_261219.ScanId;v=1;d1=11050.11050.3	controllerType=0 controllerNumber=1 scan=11050	28.3223
12324:3	1	S.MPLPPHPGHPGY.I			433.883	3	1299.64	1299.63	0	4	17	Non	407.71	312.36	312.36	3.91	1509	>sp|P02817|AMELX_BOVIN Amelogenin, X isoform OS=Bos taurus OX=9913 GN=AMELX PE=1 SV=2	1	hf1_10472_ebo_36_1_261219.ScanId;v=1;d1=10719.10719.3	controllerType=0 controllerNumber=1 scan=10719	27.7092
09706:2	1	S.M[+15.995]PLPPHPGHPGY.I		M[+16]	658.32	2	1315.63	1315.63	0	5.4	17	Non	199.75	152.31	12.2	2.25	1509	>sp|P02817|AMELX_BOVIN Amelogenin, X isoform OS=Bos taurus OX=9913 GN=AMELX PE=1 SV=2	1	hf1_10472_ebo_36_1_261219.ScanId;v=1;d1=8928.8928.4	controllerType=0 controllerNumber=1 scan=8928	24.4086
45268:3	1	S.M[+15.995]PLPPHPGHPGY.I		M[+16]	439.217	3	1315.64	1315.63	0	8.6	17	Non	284.28	284.28	16.71	3.64	1509	>sp|P02817|AMELX_BOVIN Amelogenin, X isoform OS=Bos taurus OX=9913 GN=AMELX PE=1 SV=2	1	hf1_10472_ebo_36_1_261219.ScanId;v=1;d1=33677.33677.3	controllerType=0 controllerNumber=1 scan=33677	73.5369
09675:2	1	S.M[+15.995]PLPPHPGHPGY.I		M[+16]	658.321	2	1315.63	1315.63	0	7	17	Non	369.19	320.81	14.5	4.49	1509	>sp|P02817|AMELX_BOVIN Amelogenin, X isoform OS=Bos taurus OX=9913 GN=AMELX PE=1 SV=2	1	hf1_10472_ebo_36_1_261219.ScanId;v=1;d1=8908.8908.2	controllerType=0 controllerNumber=1 scan=8908	24.3703
08036:2	1	S.M[+15.995]PLPPHPGHPGY.I		M[+16]	658.321	2	1315.63	1315.63	0	6.5	17	Non	449.38	351.08	55.58	4.81	1509	>sp|P02817|AMELX_BOVIN Amelogenin, X isoform OS=Bos taurus OX=9913 GN=AMELX PE=1 SV=2	1	hf1_10472_ebo_36_1_261219.ScanId;v=1;d1=7750.7750.2	controllerType=0 controllerNumber=1 scan=7750	22.2783
10068:3	1	S.M[+15.995]PLPPHPGHPGY.I		M[+16]	439.217	3	1315.64	1315.63	0	8.2	17	Non	471.56	431.34	29.95	5.52	1509	>sp|P02817|AMELX_BOVIN Amelogenin, X isoform OS=Bos taurus OX=9913 GN=AMELX PE=1 SV=2	1	hf1_10472_ebo_36_1_261219.ScanId;v=1;d1=9173.9173.3	controllerType=0 controllerNumber=1 scan=9173	24.8607
09388:2	1	S.M[+15.995]PLPPHPGHPGY.I		M[+16]	658.32	2	1315.63	1315.63	0	5.2	17	Non	501.23	392.1	60.26	5.73	1509	>sp|P02817|AMELX_BOVIN Amelogenin, X isoform OS=Bos taurus OX=9913 GN=AMELX PE=1 SV=2	1	hf1_10472_ebo_36_1_261219.ScanId;v=1;d1=8710.8710.2	controllerType=0 controllerNumber=1 scan=8710	24.0105
09804:3	1	S.M[+15.995]PLPPHPGHPGY.I		M[+16]	439.216	3	1315.63	1315.63	0	7	17	Non	502.76	417.24	29.98	5.56	1509	>sp|P02817|AMELX_BOVIN Amelogenin, X isoform OS=Bos taurus OX=9913 GN=AMELX PE=1 SV=2	1	hf1_10472_ebo_36_1_261219.ScanId;v=1;d1=8991.8991.3	controllerType=0 controllerNumber=1 scan=8991	24.5251
08425:3	1	S.M[+15.995]PLPPHPGHPGY.I		M[+16]	439.216	3	1315.63	1315.63	0	5.6	17	Non	519.35	452.09	33.63	6.13	1509	>sp|P02817|AMELX_BOVIN Amelogenin, X isoform OS=Bos taurus OX=9913 GN=AMELX PE=1 SV=2	1	hf1_10472_ebo_36_1_261219.ScanId;v=1;d1=8032.8032.3	controllerType=0 controllerNumber=1 scan=8032	22.7939
08168:3	1	S.M[+15.995]PLPPHPGHPGY.I		M[+16]	439.216	3	1315.63	1315.63	0	5.4	17	Non	528.4	452.33	31.93	6.26	1509	>sp|P02817|AMELX_BOVIN Amelogenin, X isoform OS=Bos taurus OX=9913 GN=AMELX PE=1 SV=2	1	hf1_10472_ebo_36_1_261219.ScanId;v=1;d1=7845.7845.3	controllerType=0 controllerNumber=1 scan=7845	22.4541
09531:3	1	S.M[+15.995]PLPPHPGHPGY.I		M[+16]	439.216	3	1315.63	1315.63	0	6.6	17	Non	529.1	437.33	34.52	6.18	1509	>sp|P02817|AMELX_BOVIN Amelogenin, X isoform OS=Bos taurus OX=9913 GN=AMELX PE=1 SV=2	1	hf1_10472_ebo_36_1_261219.ScanId;v=1;d1=8806.8806.3	controllerType=0 controllerNumber=1 scan=8806	24.1841
09101:2	1	S.M[+15.995]PLPPHPGHPGY.I		M[+16]	658.32	2	1315.63	1315.63	0	5.4	17	Non	537.83	408.08	60.8	5.92	1509	>sp|P02817|AMELX_BOVIN Amelogenin, X isoform OS=Bos taurus OX=9913 GN=AMELX PE=1 SV=2	1	hf1_10472_ebo_36_1_261219.ScanId;v=1;d1=8516.8516.2	controllerType=0 controllerNumber=1 scan=8516	23.6645
09242:3	1	S.M[+15.995]PLPPHPGHPGY.I		M[+16]	439.216	3	1315.63	1315.63	0	7.2	17	Non	549.23	455.67	31.92	6.18	1509	>sp|P02817|AMELX_BOVIN Amelogenin, X isoform OS=Bos taurus OX=9913 GN=AMELX PE=1 SV=2	1	hf1_10472_ebo_36_1_261219.ScanId;v=1;d1=8608.8608.3	controllerType=0 controllerNumber=1 scan=8608	23.8293
08953:3	1	S.M[+15.995]PLPPHPGHPGY.I		M[+16]	439.216	3	1315.63	1315.63	0	7.5	17	Non	551.3	471.56	33.73	6.18	1509	>sp|P02817|AMELX_BOVIN Amelogenin, X isoform OS=Bos taurus OX=9913 GN=AMELX PE=1 SV=2	1	hf1_10472_ebo_36_1_261219.ScanId;v=1;d1=8412.8412.3	controllerType=0 controllerNumber=1 scan=8412	23.476
08554:2	1	S.M[+15.995]PLPPHPGHPGY.I		M[+16]	658.32	2	1315.63	1315.63	0	5.5	17	Non	576.94	459.68	72.28	6.8	1509	>sp|P02817|AMELX_BOVIN Amelogenin, X isoform OS=Bos taurus OX=9913 GN=AMELX PE=1 SV=2	1	hf1_10472_ebo_36_1_261219.ScanId;v=1;d1=8129.8129.2	controllerType=0 controllerNumber=1 scan=8129	22.9677
08284:2	1	S.M[+15.995]PLPPHPGHPGY.I		M[+16]	658.319	2	1315.63	1315.63	0	4.4	17	Non	577.82	420.76	56.19	6.8	1509	>sp|P02817|AMELX_BOVIN Amelogenin, X isoform OS=Bos taurus OX=9913 GN=AMELX PE=1 SV=2	1	hf1_10472_ebo_36_1_261219.ScanId;v=1;d1=7932.7932.2	controllerType=0 controllerNumber=1 scan=7932	22.6164
08679:3	1	S.M[+15.995]PLPPHPGHPGY.I		M[+16]	439.216	3	1315.63	1315.63	0	6.5	17	Non	580.31	501.57	42.14	6.98	1509	>sp|P02817|AMELX_BOVIN Amelogenin, X isoform OS=Bos taurus OX=9913 GN=AMELX PE=1 SV=2	1	hf1_10472_ebo_36_1_261219.ScanId;v=1;d1=8221.8221.3	controllerType=0 controllerNumber=1 scan=8221	23.1314
08828:2	1	S.M[+15.995]PLPPHPGHPGY.I		M[+16]	658.321	2	1315.63	1315.63	0	6.8	17	Non	597.49	435.42	61.25	6.64	1509	>sp|P02817|AMELX_BOVIN Amelogenin, X isoform OS=Bos taurus OX=9913 GN=AMELX PE=1 SV=2	1	hf1_10472_ebo_36_1_261219.ScanId;v=1;d1=8326.8326.2	controllerType=0 controllerNumber=1 scan=8326	23.3204
07108:3	1	S.M[+15.995]PLPPHPGHP[+15.995]GY.I		M[+16], P[+16]	444.547	3	1331.63	1331.62	0	4.5	17	Non	249.72	249.72	3.28	3.96	1509	>sp|P02817|AMELX_BOVIN Amelogenin, X isoform OS=Bos taurus OX=9913 GN=AMELX PE=1 SV=2	1	hf1_10472_ebo_36_1_261219.ScanId;v=1;d1=7078.7078.3	controllerType=0 controllerNumber=1 scan=7078	21.0407
07483:3	1	S.M[+15.995]PLPPHPGHP[+15.995]GY.I		M[+16], P[+16]	444.547	3	1331.63	1331.62	0	4.1	17	Non	261.2	247.64	15.77	3.04	1509	>sp|P02817|AMELX_BOVIN Amelogenin, X isoform OS=Bos taurus OX=9913 GN=AMELX PE=1 SV=2	1	hf1_10472_ebo_36_1_261219.ScanId;v=1;d1=7348.7348.3	controllerType=0 controllerNumber=1 scan=7348	21.5308
07759:3	1	S.M[+15.995]PLPPHPGHPGY[+15.995].I		M[+16], Y[+16]	444.547	3	1331.63	1331.62	0	4.1	17	Non	286.02	263.37	3.39	3.55	1509	>sp|P02817|AMELX_BOVIN Amelogenin, X isoform OS=Bos taurus OX=9913 GN=AMELX PE=1 SV=2	1	hf1_10472_ebo_36_1_261219.ScanId;v=1;d1=7549.7549.3	controllerType=0 controllerNumber=1 scan=7549	21.903
12880:3	1	S.M[+15.995]PLPPHPGHPGYI.N		M[+16]	476.911	3	1428.72	1428.71	0	5.9	17	Non	273.13	253.01	14.87	3.96	1509	>sp|P02817|AMELX_BOVIN Amelogenin, X isoform OS=Bos taurus OX=9913 GN=AMELX PE=1 SV=2	1	hf1_10472_ebo_36_1_261219.ScanId;v=1;d1=11121.11121.3	controllerType=0 controllerNumber=1 scan=11121	28.5458
13108:3	1	S.M[+15.995]PLPPHPGHPGYI.N		M[+16]	476.91	3	1428.72	1428.71	0	4.7	17	Non	303.25	245.46	3.36	4.06	1509	>sp|P02817|AMELX_BOVIN Amelogenin, X isoform OS=Bos taurus OX=9913 GN=AMELX PE=1 SV=2	1	hf1_10472_ebo_36_1_261219.ScanId;v=1;d1=11301.11301.3	controllerType=0 controllerNumber=1 scan=11301	28.967
12650:3	1	S.M[+15.995]PLPPHPGHPGYI.N		M[+16]	476.911	3	1428.72	1428.71	0	5.9	17	Non	452.16	384	29.26	5.45	1509	>sp|P02817|AMELX_BOVIN Amelogenin, X isoform OS=Bos taurus OX=9913 GN=AMELX PE=1 SV=2	1	hf1_10472_ebo_36_1_261219.ScanId;v=1;d1=10944.10944.3	controllerType=0 controllerNumber=1 scan=10944	28.134
13388:3	1	S.MPLPPHPGHPGYIN.F			509.592	3	1526.76	1526.76	0	2.8	17	Non	446.47	313.43	313.43	3.98	1509	>sp|P02817|AMELX_BOVIN Amelogenin, X isoform OS=Bos taurus OX=9913 GN=AMELX PE=1 SV=2	1	hf1_10472_ebo_36_1_261219.ScanId;v=1;d1=11495.11495.3	controllerType=0 controllerNumber=1 scan=11495	29.3395
14011:2	1	S.MPLPPHPGHPGYIN.F			763.884	2	1526.76	1526.76	0	1.9	17	Non	450.83	336.58	336.58	4.1	1509	>sp|P02817|AMELX_BOVIN Amelogenin, X isoform OS=Bos taurus OX=9913 GN=AMELX PE=1 SV=2	1	hf1_10472_ebo_36_1_261219.ScanId;v=1;d1=11919.11919.2	controllerType=0 controllerNumber=1 scan=11919	30.1036
14267:3	1	S.MPLPPHPGHPGYIN.F			509.592	3	1526.76	1526.76	0	3.8	17	Non	464.18	355.3	355.3	4.21	1509	>sp|P02817|AMELX_BOVIN Amelogenin, X isoform OS=Bos taurus OX=9913 GN=AMELX PE=1 SV=2	1	hf1_10472_ebo_36_1_261219.ScanId;v=1;d1=12111.12111.3	controllerType=0 controllerNumber=1 scan=12111	30.446
13668:3	1	S.MPLPPHPGHPGYIN.F			509.593	3	1526.76	1526.76	0	4.7	17	Non	546.17	418.58	418.58	6.26	1509	>sp|P02817|AMELX_BOVIN Amelogenin, X isoform OS=Bos taurus OX=9913 GN=AMELX PE=1 SV=2	1	hf1_10472_ebo_36_1_261219.ScanId;v=1;d1=11686.11686.3	controllerType=0 controllerNumber=1 scan=11686	29.6863
13960:3	1	S.MPLPPHPGHPGYIN.F			509.593	3	1526.77	1526.76	0	5.1	17	Non	579.93	480.1	480.1	6.56	1509	>sp|P02817|AMELX_BOVIN Amelogenin, X isoform OS=Bos taurus OX=9913 GN=AMELX PE=1 SV=2	1	hf1_10472_ebo_36_1_261219.ScanId;v=1;d1=11884.11884.3	controllerType=0 controllerNumber=1 scan=11884	30.0403
13018:3	1	S.MP[+15.995]LPPHPGHPGYIN.F		P[+16]	514.925	3	1542.76	1542.75	0	5.4	17	Non	178.36	171.07	5.8	2.46	1509	>sp|P02817|AMELX_BOVIN Amelogenin, X isoform OS=Bos taurus OX=9913 GN=AMELX PE=1 SV=2	1	hf1_10472_ebo_36_1_261219.ScanId;v=1;d1=11226.11226.3	controllerType=0 controllerNumber=1 scan=11226	28.7934
11277:3	1	S.M[+31.990]PLPPHPGHPGYIN.F		M[+32]	520.256	3	1558.75	1558.75	0	4.6	17	Non	193.09	193.09	0	2.46	1509	>sp|P02817|AMELX_BOVIN Amelogenin, X isoform OS=Bos taurus OX=9913 GN=AMELX PE=1 SV=2	1	hf1_10472_ebo_36_1_261219.ScanId;v=1;d1=9989.9989.3	controllerType=0 controllerNumber=1 scan=9989	26.3417
14811:2	1	S.MPLPPHPGHPGYIN[+0.984].F		N[+1]	764.378	2	1527.75	1527.74	0	4.9	17	Non	211.68	158.79	158.79	2.2	1509	>sp|P02817|AMELX_BOVIN Amelogenin, X isoform OS=Bos taurus OX=9913 GN=AMELX PE=1 SV=2	1	hf1_10472_ebo_36_1_261219.ScanId;v=1;d1=12481.12481.4	controllerType=0 controllerNumber=1 scan=12481	31.1215
11804:3	1	S.M[+31.990]PLPPHPGHPGYIN.F		M[+32]	520.257	3	1558.76	1558.75	0	6.1	17	Non	256.92	256.92	8.39	3.96	1509	>sp|P02817|AMELX_BOVIN Amelogenin, X isoform OS=Bos taurus OX=9913 GN=AMELX PE=1 SV=2	1	hf1_10472_ebo_36_1_261219.ScanId;v=1;d1=10359.10359.3	controllerType=0 controllerNumber=1 scan=10359	27.0391
12667:3	1	S.M[+15.995]PLPPHPGHPGYIN.F		M[+16]	514.925	3	1542.76	1542.75	0	5.2	17	Non	316.81	313.87	3.17	4.13	1509	>sp|P02817|AMELX_BOVIN Amelogenin, X isoform OS=Bos taurus OX=9913 GN=AMELX PE=1 SV=2	1	hf1_10472_ebo_36_1_261219.ScanId;v=1;d1=10955.10955.3	controllerType=0 controllerNumber=1 scan=10955	28.1533
11863:3	1	S.M[+15.995]PLPPHPGHPGYIN.F		M[+16]	514.926	3	1542.76	1542.75	0	6.4	17	Non	331.87	331.87	4.57	4.43	1509	>sp|P02817|AMELX_BOVIN Amelogenin, X isoform OS=Bos taurus OX=9913 GN=AMELX PE=1 SV=2	1	hf1_10472_ebo_36_1_261219.ScanId;v=1;d1=10396.10396.3	controllerType=0 controllerNumber=1 scan=10396	27.1052
14690:2	1	S.MPLPPHPGHPGYIN[+0.984].F		N[+1]	764.378	2	1527.75	1527.74	0	4.4	17	Non	341.31	331.37	331.37	4.52	1509	>sp|P02817|AMELX_BOVIN Amelogenin, X isoform OS=Bos taurus OX=9913 GN=AMELX PE=1 SV=2	1	hf1_10472_ebo_36_1_261219.ScanId;v=1;d1=12400.12400.2	controllerType=0 controllerNumber=1 scan=12400	30.9742
11548:3	1	S.M[+31.990]PLPPHPGHPGYIN.F		M[+32]	520.255	3	1558.75	1558.75	0	2.4	17	Non	378.06	378.06	0	4.67	1509	>sp|P02817|AMELX_BOVIN Amelogenin, X isoform OS=Bos taurus OX=9913 GN=AMELX PE=1 SV=2	1	hf1_10472_ebo_36_1_261219.ScanId;v=1;d1=10180.10180.3	controllerType=0 controllerNumber=1 scan=10180	26.6967
11603:3	1	S.M[+15.995]PLPPHPGHPGYIN.F		M[+16]	514.925	3	1542.76	1542.75	0	4.5	17	Non	410.49	410.49	3.73	5.49	1509	>sp|P02817|AMELX_BOVIN Amelogenin, X isoform OS=Bos taurus OX=9913 GN=AMELX PE=1 SV=2	1	hf1_10472_ebo_36_1_261219.ScanId;v=1;d1=10217.10217.3	controllerType=0 controllerNumber=1 scan=10217	26.7658
11422:2	1	S.M[+15.995]PLPPHPGHPGYIN.F		M[+16]	771.885	2	1542.76	1542.75	0	6.2	17	Non	454.77	432.21	36.13	5.83	1509	>sp|P02817|AMELX_BOVIN Amelogenin, X isoform OS=Bos taurus OX=9913 GN=AMELX PE=1 SV=2	1	hf1_10472_ebo_36_1_261219.ScanId;v=1;d1=10092.10092.2	controllerType=0 controllerNumber=1 scan=10092	26.533
14558:3	1	S.MPLPPHPGHPGYIN[+0.984].F		N[+1]	509.921	3	1527.75	1527.74	0	5.2	17	Non	460.49	429.44	429.44	5.59	1509	>sp|P02817|AMELX_BOVIN Amelogenin, X isoform OS=Bos taurus OX=9913 GN=AMELX PE=1 SV=2	1	hf1_10472_ebo_36_1_261219.ScanId;v=1;d1=12305.12305.3	controllerType=0 controllerNumber=1 scan=12305	30.7983
11341:3	1	S.M[+15.995]PLPPHPGHPGYIN.F		M[+16]	514.925	3	1542.76	1542.75	0	5.1	17	Non	479.3	479.3	14.4	6.09	1509	>sp|P02817|AMELX_BOVIN Amelogenin, X isoform OS=Bos taurus OX=9913 GN=AMELX PE=1 SV=2	1	hf1_10472_ebo_36_1_261219.ScanId;v=1;d1=10036.10036.3	controllerType=0 controllerNumber=1 scan=10036	26.4286
10240:3	1	S.M[+15.995]PLPPHPGHPGYIN.F		M[+16]	514.924	3	1542.76	1542.75	0	3.4	17	Non	479.96	479.96	4.42	5.56	1509	>sp|P02817|AMELX_BOVIN Amelogenin, X isoform OS=Bos taurus OX=9913 GN=AMELX PE=1 SV=2	1	hf1_10472_ebo_36_1_261219.ScanId;v=1;d1=9287.9287.3	controllerType=0 controllerNumber=1 scan=9287	25.0682
11075:3	1	S.M[+15.995]PLPPHPGHPGYIN.F		M[+16]	514.925	3	1542.76	1542.75	0	5.8	17	Non	511.93	511.93	4.28	6.13	1509	>sp|P02817|AMELX_BOVIN Amelogenin, X isoform OS=Bos taurus OX=9913 GN=AMELX PE=1 SV=2	1	hf1_10472_ebo_36_1_261219.ScanId;v=1;d1=9853.9853.3	controllerType=0 controllerNumber=1 scan=9853	26.092
10525:3	1	S.M[+15.995]PLPPHPGHPGYIN.F		M[+16]	514.926	3	1542.76	1542.75	0	6.9	17	Non	517.43	517.43	24.42	6.05	1509	>sp|P02817|AMELX_BOVIN Amelogenin, X isoform OS=Bos taurus OX=9913 GN=AMELX PE=1 SV=2	1	hf1_10472_ebo_36_1_261219.ScanId;v=1;d1=9477.9477.3	controllerType=0 controllerNumber=1 scan=9477	25.4084
14832:3	1	S.MPLPPHPGHPGYIN[+0.984].F		N[+1]	509.921	3	1527.75	1527.74	0	4.8	17	Non	523.01	480.53	480.53	6.26	1509	>sp|P02817|AMELX_BOVIN Amelogenin, X isoform OS=Bos taurus OX=9913 GN=AMELX PE=1 SV=2	1	hf1_10472_ebo_36_1_261219.ScanId;v=1;d1=12495.12495.3	controllerType=0 controllerNumber=1 scan=12495	31.1475
10810:3	1	S.M[+15.995]PLPPHPGHPGYIN.F		M[+16]	514.926	3	1542.76	1542.75	0	6.7	17	Non	539.5	539.5	13.45	6.18	1509	>sp|P02817|AMELX_BOVIN Amelogenin, X isoform OS=Bos taurus OX=9913 GN=AMELX PE=1 SV=2	1	hf1_10472_ebo_36_1_261219.ScanId;v=1;d1=9669.9669.3	controllerType=0 controllerNumber=1 scan=9669	25.7517
15147:3	1	S.MPLPPHPGHPGYIN[+0.984].F		N[+1]	509.92	3	1527.75	1527.74	0	2.9	17	Non	560.35	511.25	511.25	6.04	1509	>sp|P02817|AMELX_BOVIN Amelogenin, X isoform OS=Bos taurus OX=9913 GN=AMELX PE=1 SV=2	1	hf1_10472_ebo_36_1_261219.ScanId;v=1;d1=12726.12726.3	controllerType=0 controllerNumber=1 scan=12726	31.5647
11154:2	1	S.M[+15.995]PLPPHPGHPGYIN.F		M[+16]	771.885	2	1542.76	1542.75	0	6.3	17	Non	598.65	558.29	62.02	6.72	1509	>sp|P02817|AMELX_BOVIN Amelogenin, X isoform OS=Bos taurus OX=9913 GN=AMELX PE=1 SV=2	1	hf1_10472_ebo_36_1_261219.ScanId;v=1;d1=9906.9906.2	controllerType=0 controllerNumber=1 scan=9906	26.1904
10308:2	1	S.M[+15.995]PLPPHPGHPGYIN.F		M[+16]	771.883	2	1542.76	1542.75	0	4	17	Non	631.44	592.99	59.38	7.28	1509	>sp|P02817|AMELX_BOVIN Amelogenin, X isoform OS=Bos taurus OX=9913 GN=AMELX PE=1 SV=2	1	hf1_10472_ebo_36_1_261219.ScanId;v=1;d1=9335.9335.2	controllerType=0 controllerNumber=1 scan=9335	25.1524
10595:2	1	S.M[+15.995]PLPPHPGHPGYIN.F		M[+16]	771.884	2	1542.76	1542.75	0	5.8	17	Non	636.57	582.89	52.37	7.8	1509	>sp|P02817|AMELX_BOVIN Amelogenin, X isoform OS=Bos taurus OX=9913 GN=AMELX PE=1 SV=2	1	hf1_10472_ebo_36_1_261219.ScanId;v=1;d1=9526.9526.2	controllerType=0 controllerNumber=1 scan=9526	25.4939
10878:2	1	S.M[+15.995]PLPPHPGHPGYIN.F		M[+16]	771.884	2	1542.76	1542.75	0	5.3	17	Non	659.44	623.47	52.91	9.3	1509	>sp|P02817|AMELX_BOVIN Amelogenin, X isoform OS=Bos taurus OX=9913 GN=AMELX PE=1 SV=2	1	hf1_10472_ebo_36_1_261219.ScanId;v=1;d1=9717.9717.2	controllerType=0 controllerNumber=1 scan=9717	25.8425
09846:2	1	S.M[+15.995]PLPPHPGHP[+15.995]GYIN.F		M[+16], P[+16]	779.882	2	1558.76	1558.75	0	5.6	17	Non	162.83	96.19	0	0.94	1509	>sp|P02817|AMELX_BOVIN Amelogenin, X isoform OS=Bos taurus OX=9913 GN=AMELX PE=1 SV=2	1	hf1_10472_ebo_36_1_261219.ScanId;v=1;d1=9017.9017.2	controllerType=0 controllerNumber=1 scan=9017	24.5719
10225:3	1	S.MP[+15.995]LPPHP[+15.995]GHPGYIN.F		P[+16]*2	520.255	3	1558.75	1558.75	0	3.1	17	Non	181.67	181.67	0	2.21	1509	>sp|P02817|AMELX_BOVIN Amelogenin, X isoform OS=Bos taurus OX=9913 GN=AMELX PE=1 SV=2	1	hf1_10472_ebo_36_1_261219.ScanId;v=1;d1=9276.9276.3	controllerType=0 controllerNumber=1 scan=9276	25.0463
09891:2	1	S.M[+15.995]PLPPHPGHPGY[+15.995]IN.F		M[+16], Y[+16]	779.882	2	1558.76	1558.75	0	5.8	17	Non	195.95	140.57	0	2.2	1509	>sp|P02817|AMELX_BOVIN Amelogenin, X isoform OS=Bos taurus OX=9913 GN=AMELX PE=1 SV=2	1	hf1_10472_ebo_36_1_261219.ScanId;v=1;d1=9049.9049.4	controllerType=0 controllerNumber=1 scan=9049	24.6309
10358:3	1	S.MP[+15.995]LPPHPGHP[+15.995]GYIN.F		P[+16]*2	520.256	3	1558.76	1558.75	0	5.1	17	Non	225.3	225.3	4	2.48	1509	>sp|P02817|AMELX_BOVIN Amelogenin, X isoform OS=Bos taurus OX=9913 GN=AMELX PE=1 SV=2	1	hf1_10472_ebo_36_1_261219.ScanId;v=1;d1=9369.9369.3	controllerType=0 controllerNumber=1 scan=9369	25.214
10692:3	1	S.M[+15.995]PLPPHP[+15.995]GHPGYIN.F		M[+16], P[+16]	520.257	3	1558.76	1558.75	0	5.4	17	Non	229.9	229.9	3.31	2.48	1509	>sp|P02817|AMELX_BOVIN Amelogenin, X isoform OS=Bos taurus OX=9913 GN=AMELX PE=1 SV=2	1	hf1_10472_ebo_36_1_261219.ScanId;v=1;d1=9590.9590.3	controllerType=0 controllerNumber=1 scan=9590	25.6105
09292:2	1	S.M[+15.995]PLPPHPGHP[+15.995]GYIN.F		M[+16], P[+16]	779.881	2	1558.75	1558.75	0	5	17	Non	251.56	251.56	0	3.75	1509	>sp|P02817|AMELX_BOVIN Amelogenin, X isoform OS=Bos taurus OX=9913 GN=AMELX PE=1 SV=2	1	hf1_10472_ebo_36_1_261219.ScanId;v=1;d1=8639.8639.2	controllerType=0 controllerNumber=1 scan=8639	23.8801
09614:3	1	S.MP[+15.995]LPPHPGHP[+15.995]GYIN.F		P[+16]*2	520.256	3	1558.76	1558.75	0	5.1	17	Non	292.54	292.54	3.11	4.13	1509	>sp|P02817|AMELX_BOVIN Amelogenin, X isoform OS=Bos taurus OX=9913 GN=AMELX PE=1 SV=2	1	hf1_10472_ebo_36_1_261219.ScanId;v=1;d1=8866.8866.3	controllerType=0 controllerNumber=1 scan=8866	24.2946
12561:2	1	S.M[+15.995]PLPPHPGHPGYIN[+0.984].F		M[+16], N[+1]	772.374	2	1543.74	1543.74	0	3.4	17	Non	309.87	294.05	33.62	3.85	1509	>sp|P02817|AMELX_BOVIN Amelogenin, X isoform OS=Bos taurus OX=9913 GN=AMELX PE=1 SV=2	1	hf1_10472_ebo_36_1_261219.ScanId;v=1;d1=10886.10886.2	controllerType=0 controllerNumber=1 scan=10886	28.0305
09902:3	1	S.M[+15.995]PLPPHPGHP[+15.995]GYIN.F		M[+16], P[+16]	520.257	3	1558.76	1558.75	0	5.8	17	Non	333.86	333.86	6.38	4.51	1509	>sp|P02817|AMELX_BOVIN Amelogenin, X isoform OS=Bos taurus OX=9913 GN=AMELX PE=1 SV=2	1	hf1_10472_ebo_36_1_261219.ScanId;v=1;d1=9057.9057.3	controllerType=0 controllerNumber=1 scan=9057	24.6456
09056:3	1	S.M[+15.995]PLPPHPGHP[+15.995]GYIN.F		M[+16], P[+16]	520.256	3	1558.75	1558.75	0	4.7	17	Non	344.29	344.29	4.64	4.28	1509	>sp|P02817|AMELX_BOVIN Amelogenin, X isoform OS=Bos taurus OX=9913 GN=AMELX PE=1 SV=2	1	hf1_10472_ebo_36_1_261219.ScanId;v=1;d1=8484.8484.3	controllerType=0 controllerNumber=1 scan=8484	23.6085
09339:3	1	S.M[+15.995]PLPPHPGHP[+15.995]GYIN.F		M[+16], P[+16]	520.257	3	1558.76	1558.75	0	6.3	17	Non	365.16	365.16	5.42	5.42	1509	>sp|P02817|AMELX_BOVIN Amelogenin, X isoform OS=Bos taurus OX=9913 GN=AMELX PE=1 SV=2	1	hf1_10472_ebo_36_1_261219.ScanId;v=1;d1=8676.8676.3	controllerType=0 controllerNumber=1 scan=8676	23.9517
11961:2	1	S.M[+15.995]PLPPHPGHPGYIN[+0.984].F		M[+16], N[+1]	772.372	2	1543.74	1543.74	0	0.6	17	Non	382.95	363.94	32.69	4.92	1509	>sp|P02817|AMELX_BOVIN Amelogenin, X isoform OS=Bos taurus OX=9913 GN=AMELX PE=1 SV=2	1	hf1_10472_ebo_36_1_261219.ScanId;v=1;d1=10464.10464.2	controllerType=0 controllerNumber=1 scan=10464	27.2321
11604:3	1	S.M[+15.995]PLPPHPGHPGYIN[+0.984].F		M[+16], N[+1]	515.253	3	1543.74	1543.74	0	5.1	17	Non	475.62	475.62	10.1	5.59	1509	>sp|P02817|AMELX_BOVIN Amelogenin, X isoform OS=Bos taurus OX=9913 GN=AMELX PE=1 SV=2	1	hf1_10472_ebo_36_1_261219.ScanId;v=1;d1=10217.10217.3	controllerType=0 controllerNumber=1 scan=10217	26.7658
12668:3	1	S.M[+15.995]PLPPHPGHPGYIN[+0.984].F		M[+16], N[+1]	515.252	3	1543.74	1543.74	0	4.2	17	Non	477.98	464.78	8.39	5.51	1509	>sp|P02817|AMELX_BOVIN Amelogenin, X isoform OS=Bos taurus OX=9913 GN=AMELX PE=1 SV=2	1	hf1_10472_ebo_36_1_261219.ScanId;v=1;d1=10955.10955.3	controllerType=0 controllerNumber=1 scan=10955	28.1533
11688:2	1	S.M[+15.995]PLPPHPGHPGYIN[+0.984].F		M[+16], N[+1]	772.373	2	1543.74	1543.74	0	2	17	Non	495.38	422.99	58.6	5	1509	>sp|P02817|AMELX_BOVIN Amelogenin, X isoform OS=Bos taurus OX=9913 GN=AMELX PE=1 SV=2	1	hf1_10472_ebo_36_1_261219.ScanId;v=1;d1=10274.10274.2	controllerType=0 controllerNumber=1 scan=10274	26.8806
12125:3	1	S.M[+15.995]PLPPHPGHPGYIN[+0.984].F		M[+16], N[+1]	515.252	3	1543.74	1543.74	0	3.8	17	Non	496.85	496.85	18.14	5.6	1509	>sp|P02817|AMELX_BOVIN Amelogenin, X isoform OS=Bos taurus OX=9913 GN=AMELX PE=1 SV=2	1	hf1_10472_ebo_36_1_261219.ScanId;v=1;d1=10581.10581.3	controllerType=0 controllerNumber=1 scan=10581	27.4541
11864:3	1	S.M[+15.995]PLPPHPGHPGYIN[+0.984].F		M[+16], N[+1]	515.253	3	1543.74	1543.74	0	5	17	Non	505.88	505.88	12.4	6.13	1509	>sp|P02817|AMELX_BOVIN Amelogenin, X isoform OS=Bos taurus OX=9913 GN=AMELX PE=1 SV=2	1	hf1_10472_ebo_36_1_261219.ScanId;v=1;d1=10396.10396.3	controllerType=0 controllerNumber=1 scan=10396	27.1052
11423:2	1	S.M[+15.995]PLPPHPGHPGYIN[+0.984].F		M[+16], N[+1]	772.373	2	1543.74	1543.74	0	1.1	17	Non	508	472.81	71.56	5	1509	>sp|P02817|AMELX_BOVIN Amelogenin, X isoform OS=Bos taurus OX=9913 GN=AMELX PE=1 SV=2	1	hf1_10472_ebo_36_1_261219.ScanId;v=1;d1=10092.10092.2	controllerType=0 controllerNumber=1 scan=10092	26.533
12392:3	1	S.M[+15.995]PLPPHPGHPGYIN[+0.984].F		M[+16], N[+1]	515.252	3	1543.74	1543.74	0	4.1	17	Non	508.32	508.32	19.61	5.11	1509	>sp|P02817|AMELX_BOVIN Amelogenin, X isoform OS=Bos taurus OX=9913 GN=AMELX PE=1 SV=2	1	hf1_10472_ebo_36_1_261219.ScanId;v=1;d1=10767.10767.3	controllerType=0 controllerNumber=1 scan=10767	27.7993
19702:3	1	S.MPLPPHPGHPGYINF.S			558.617	3	1673.84	1673.83	0	5.9	17	Non	365.52	271.18	271.18	4.74	1509	>sp|P02817|AMELX_BOVIN Amelogenin, X isoform OS=Bos taurus OX=9913 GN=AMELX PE=1 SV=2	1	hf1_10472_ebo_36_1_261219.ScanId;v=1;d1=15935.15935.3	controllerType=0 controllerNumber=1 scan=15935	37.3858
19994:3	1	S.MPLPPHPGHPGYINF.S			558.617	3	1673.84	1673.83	0	7.2	17	Non	388.72	347.52	347.52	4.88	1509	>sp|P02817|AMELX_BOVIN Amelogenin, X isoform OS=Bos taurus OX=9913 GN=AMELX PE=1 SV=2	1	hf1_10472_ebo_36_1_261219.ScanId;v=1;d1=16128.16128.3	controllerType=0 controllerNumber=1 scan=16128	37.7307
20317:3	1	S.MPLPPHPGHPGYINF.S			558.616	3	1673.83	1673.83	0	4.7	17	Non	412.74	397.79	397.79	5.84	1509	>sp|P02817|AMELX_BOVIN Amelogenin, X isoform OS=Bos taurus OX=9913 GN=AMELX PE=1 SV=2	1	hf1_10472_ebo_36_1_261219.ScanId;v=1;d1=16340.16340.3	controllerType=0 controllerNumber=1 scan=16340	38.1092
20579:3	1	S.MPLPPHPGHPGYINF.S			558.616	3	1673.83	1673.83	0	5.3	17	Non	446.21	407.22	407.22	5.92	1509	>sp|P02817|AMELX_BOVIN Amelogenin, X isoform OS=Bos taurus OX=9913 GN=AMELX PE=1 SV=2	1	hf1_10472_ebo_36_1_261219.ScanId;v=1;d1=16527.16527.3	controllerType=0 controllerNumber=1 scan=16527	38.4514
20872:3	1	S.MPLPPHPGHPGYINF.S			558.617	3	1673.84	1673.83	0	7.2	17	Non	500.91	455.81	455.81	5.96	1509	>sp|P02817|AMELX_BOVIN Amelogenin, X isoform OS=Bos taurus OX=9913 GN=AMELX PE=1 SV=2	1	hf1_10472_ebo_36_1_261219.ScanId;v=1;d1=16720.16720.3	controllerType=0 controllerNumber=1 scan=16720	38.8005
21285:2	1	S.MPLPPHPGHPGYINF.S			837.424	2	1673.84	1673.83	0	8.6	17	Non	531.23	458.96	458.96	5.69	1509	>sp|P02817|AMELX_BOVIN Amelogenin, X isoform OS=Bos taurus OX=9913 GN=AMELX PE=1 SV=2	1	hf1_10472_ebo_36_1_261219.ScanId;v=1;d1=16996.16996.2	controllerType=0 controllerNumber=1 scan=16996	39.2959
21159:3	1	S.MPLPPHPGHPGYINF.S			558.617	3	1673.84	1673.83	0	6.4	17	Non	533.16	482.91	482.91	6.1	1509	>sp|P02817|AMELX_BOVIN Amelogenin, X isoform OS=Bos taurus OX=9913 GN=AMELX PE=1 SV=2	1	hf1_10472_ebo_36_1_261219.ScanId;v=1;d1=16914.16914.3	controllerType=0 controllerNumber=1 scan=16914	39.1461
19844:2	1	S.MPLPPHPGHPGYINF.S			837.421	2	1673.84	1673.83	0	5.6	17	Non	580.56	512.95	512.95	7.7	1509	>sp|P02817|AMELX_BOVIN Amelogenin, X isoform OS=Bos taurus OX=9913 GN=AMELX PE=1 SV=2	1	hf1_10472_ebo_36_1_261219.ScanId;v=1;d1=16030.16030.2	controllerType=0 controllerNumber=1 scan=16030	37.5574
20137:2	1	S.MPLPPHPGHPGYINF.S			837.421	2	1673.84	1673.83	0	5.6	17	Non	611.87	544.17	544.17	8.13	1509	>sp|P02817|AMELX_BOVIN Amelogenin, X isoform OS=Bos taurus OX=9913 GN=AMELX PE=1 SV=2	1	hf1_10472_ebo_36_1_261219.ScanId;v=1;d1=16221.16221.2	controllerType=0 controllerNumber=1 scan=16221	37.8992
20421:2	1	S.MPLPPHPGHPGYINF.S			837.42	2	1673.83	1673.83	0	4.8	17	Non	653.28	551.82	551.82	9.21	1509	>sp|P02817|AMELX_BOVIN Amelogenin, X isoform OS=Bos taurus OX=9913 GN=AMELX PE=1 SV=2	1	hf1_10472_ebo_36_1_261219.ScanId;v=1;d1=16413.16413.2	controllerType=0 controllerNumber=1 scan=16413	38.2452
20988:2	1	S.MPLPPHPGHPGYINF.S			837.421	2	1673.84	1673.83	0	5.9	17	Non	685.29	602.35	602.35	9.21	1509	>sp|P02817|AMELX_BOVIN Amelogenin, X isoform OS=Bos taurus OX=9913 GN=AMELX PE=1 SV=2	1	hf1_10472_ebo_36_1_261219.ScanId;v=1;d1=16802.16802.2	controllerType=0 controllerNumber=1 scan=16802	38.9483
20700:2	1	S.MPLPPHPGHPGYINF.S			837.423	2	1673.84	1673.83	0	7.2	17	Non	696.6	593.85	593.85	9.63	1509	>sp|P02817|AMELX_BOVIN Amelogenin, X isoform OS=Bos taurus OX=9913 GN=AMELX PE=1 SV=2	1	hf1_10472_ebo_36_1_261219.ScanId;v=1;d1=16608.16608.2	controllerType=0 controllerNumber=1 scan=16608	38.5997
00109:3	1	S.MP[+15.995]LPPHPGHPGYINF.S		P[+16]	563.947	3	1689.83	1689.82	0	3.8	17	Non	71.25	71.25	4	2.21	1509	>sp|P02817|AMELX_BOVIN Amelogenin, X isoform OS=Bos taurus OX=9913 GN=AMELX PE=1 SV=2	1	hf1_10472_ebo_36_1_261219.ScanId;v=1;d1=1791.1791.3	controllerType=0 controllerNumber=1 scan=1791	10.41
40158:3	1	S.MP[+15.995]LPPHPGHPGYINF.S		P[+16]	563.949	3	1689.83	1689.82	0	7.4	17	Non	101.55	101.55	4	2.23	1509	>sp|P02817|AMELX_BOVIN Amelogenin, X isoform OS=Bos taurus OX=9913 GN=AMELX PE=1 SV=2	1	hf1_10472_ebo_36_1_261219.ScanId;v=1;d1=29118.29118.3	controllerType=0 controllerNumber=1 scan=29118	61.0767
43595:3	1	S.MP[+15.995]LPPHPGHPGYINF.S		P[+16]	563.947	3	1689.83	1689.82	0	4	17	Non	125.22	125.22	4	2.22	1509	>sp|P02817|AMELX_BOVIN Amelogenin, X isoform OS=Bos taurus OX=9913 GN=AMELX PE=1 SV=2	1	hf1_10472_ebo_36_1_261219.ScanId;v=1;d1=31486.31486.3	controllerType=0 controllerNumber=1 scan=31486	65.6784
00186:3	1	S.MP[+15.995]LPPHPGHPGYINF.S		P[+16]	563.947	3	1689.83	1689.82	0	3.9	17	Non	143.72	143.72	4	2.26	1509	>sp|P02817|AMELX_BOVIN Amelogenin, X isoform OS=Bos taurus OX=9913 GN=AMELX PE=1 SV=2	1	hf1_10472_ebo_36_1_261219.ScanId;v=1;d1=2100.2100.3	controllerType=0 controllerNumber=1 scan=2100	12.1067
00124:3	1	S.MP[+15.995]LPPHPGHPGYINF.S		P[+16]	563.947	3	1689.83	1689.82	0	3.8	17	Non	148.48	148.48	4	2.22	1509	>sp|P02817|AMELX_BOVIN Amelogenin, X isoform OS=Bos taurus OX=9913 GN=AMELX PE=1 SV=2	1	hf1_10472_ebo_36_1_261219.ScanId;v=1;d1=1964.1964.3	controllerType=0 controllerNumber=1 scan=1964	11.4324
44719:3	1	S.MP[+15.995]LPPHPGHPGYINF.S		P[+16]	563.947	3	1689.83	1689.82	0	4.1	17	Non	153.78	153.78	4	2.26	1509	>sp|P02817|AMELX_BOVIN Amelogenin, X isoform OS=Bos taurus OX=9913 GN=AMELX PE=1 SV=2	1	hf1_10472_ebo_36_1_261219.ScanId;v=1;d1=32890.32890.3	controllerType=0 controllerNumber=1 scan=32890	70.6048
00297:3	1	S.MP[+15.995]LPPHPGHPGYINF.S		P[+16]	563.945	3	1689.82	1689.82	0	0.2	17	Non	155.36	155.36	4	2.24	1509	>sp|P02817|AMELX_BOVIN Amelogenin, X isoform OS=Bos taurus OX=9913 GN=AMELX PE=1 SV=2	1	hf1_10472_ebo_36_1_261219.ScanId;v=1;d1=2205.2205.3	controllerType=0 controllerNumber=1 scan=2205	12.4447
45422:3	1	S.MP[+15.995]LPPHPGHPGYINF.S		P[+16]	563.948	3	1689.83	1689.82	0	4.8	17	Non	169.19	169.19	4	3.04	1509	>sp|P02817|AMELX_BOVIN Amelogenin, X isoform OS=Bos taurus OX=9913 GN=AMELX PE=1 SV=2	1	hf1_10472_ebo_36_1_261219.ScanId;v=1;d1=34145.34145.3	controllerType=0 controllerNumber=1 scan=34145	75.9698
44124:3	1	S.MP[+15.995]LPPHPGHPGYINF.S		P[+16]	563.947	3	1689.83	1689.82	0	4.1	17	Non	210.4	210.4	4	2.68	1509	>sp|P02817|AMELX_BOVIN Amelogenin, X isoform OS=Bos taurus OX=9913 GN=AMELX PE=1 SV=2	1	hf1_10472_ebo_36_1_261219.ScanId;v=1;d1=32211.32211.3	controllerType=0 controllerNumber=1 scan=32211	68.2226
44844:3	1	S.MP[+15.995]LPPHPGHPGYINF.S		P[+16]	563.945	3	1689.82	1689.82	0	-0.1	17	Non	219.24	219.24	4	2.52	1509	>sp|P02817|AMELX_BOVIN Amelogenin, X isoform OS=Bos taurus OX=9913 GN=AMELX PE=1 SV=2	1	hf1_10472_ebo_36_1_261219.ScanId;v=1;d1=33066.33066.3	controllerType=0 controllerNumber=1 scan=33066	71.2888
44952:2	1	S.M[+15.995]PLPPHPGHPGYINF.S		M[+16]	845.417	2	1689.83	1689.82	0	3.9	17	Non	221.14	221.14	39.8	3.16	1509	>sp|P02817|AMELX_BOVIN Amelogenin, X isoform OS=Bos taurus OX=9913 GN=AMELX PE=1 SV=2	1	hf1_10472_ebo_36_1_261219.ScanId;v=1;d1=33230.33230.2	controllerType=0 controllerNumber=1 scan=33230	71.9223
25314:3	1	S.MP[+15.995]LPPHPGHPGYINF.S		P[+16]	563.948	3	1689.83	1689.82	0	6.1	17	Non	234.52	234.52	4	3.09	1509	>sp|P02817|AMELX_BOVIN Amelogenin, X isoform OS=Bos taurus OX=9913 GN=AMELX PE=1 SV=2	1	hf1_10472_ebo_36_1_261219.ScanId;v=1;d1=19627.19627.3	controllerType=0 controllerNumber=1 scan=19627	43.9343
15308:3	1	S.MP[+15.995]LPPHPGHPGYINF.S		P[+16]	563.948	3	1689.83	1689.82	0	6	17	Non	246.65	246.65	4.42	4.36	1509	>sp|P02817|AMELX_BOVIN Amelogenin, X isoform OS=Bos taurus OX=9913 GN=AMELX PE=1 SV=2	1	hf1_10472_ebo_36_1_261219.ScanId;v=1;d1=12834.12834.3	controllerType=0 controllerNumber=1 scan=12834	31.754
23132:3	1	S.MP[+15.995]LPPHPGHPGYINF.S		P[+16]	563.948	3	1689.83	1689.82	0	5.1	17	Non	248.45	248.45	4	4.36	1509	>sp|P02817|AMELX_BOVIN Amelogenin, X isoform OS=Bos taurus OX=9913 GN=AMELX PE=1 SV=2	1	hf1_10472_ebo_36_1_261219.ScanId;v=1;d1=18188.18188.3	controllerType=0 controllerNumber=1 scan=18188	41.4028
00002:3	1	S.MP[+15.995]LPPHPGHPGYINF.S		P[+16]	563.948	3	1689.83	1689.82	0	5.6	17	Non	251.49	251.49	4	4.36	1509	>sp|P02817|AMELX_BOVIN Amelogenin, X isoform OS=Bos taurus OX=9913 GN=AMELX PE=1 SV=2	1	hf1_10472_ebo_36_1_261219.ScanId;v=1;d1=100.100.3	controllerType=0 controllerNumber=1 scan=100	0.5437
43732:3	1	S.MP[+15.995]LPPHPGHPGYINF.S		P[+16]	563.947	3	1689.83	1689.82	0	4	17	Non	260.14	260.14	4	3.85	1509	>sp|P02817|AMELX_BOVIN Amelogenin, X isoform OS=Bos taurus OX=9913 GN=AMELX PE=1 SV=2	1	hf1_10472_ebo_36_1_261219.ScanId;v=1;d1=31646.31646.3	controllerType=0 controllerNumber=1 scan=31646	66.1734
45012:3	1	S.MP[+15.995]LPPHPGHPGYINF.S		P[+16]	563.946	3	1689.82	1689.82	0	2.2	17	Non	262.78	262.78	4	3.64	1509	>sp|P02817|AMELX_BOVIN Amelogenin, X isoform OS=Bos taurus OX=9913 GN=AMELX PE=1 SV=2	1	hf1_10472_ebo_36_1_261219.ScanId;v=1;d1=33324.33324.3	controllerType=0 controllerNumber=1 scan=33324	72.3037
45014:2	1	S.MP[+15.995]LPPHPGHPGYINF.S		P[+16]	845.417	2	1689.83	1689.82	0	3	17	Non	264.4	264.4	4	4.31	1509	>sp|P02817|AMELX_BOVIN Amelogenin, X isoform OS=Bos taurus OX=9913 GN=AMELX PE=1 SV=2	1	hf1_10472_ebo_36_1_261219.ScanId;v=1;d1=33331.33331.2	controllerType=0 controllerNumber=1 scan=33331	72.3377
16895:3	1	S.MP[+15.995]LPPHPGHPGYINF.S		P[+16]	563.95	3	1689.84	1689.82	0	9.5	17	Non	275.97	275.97	4	3.65	1509	>sp|P02817|AMELX_BOVIN Amelogenin, X isoform OS=Bos taurus OX=9913 GN=AMELX PE=1 SV=2	1	hf1_10472_ebo_36_1_261219.ScanId;v=1;d1=13972.13972.3	controllerType=0 controllerNumber=1 scan=13972	33.8335
45491:3	1	S.MP[+15.995]LPPHPGHPGYINF.S		P[+16]	563.948	3	1689.83	1689.82	0	6.1	17	Non	279.53	279.53	4	4.36	1509	>sp|P02817|AMELX_BOVIN Amelogenin, X isoform OS=Bos taurus OX=9913 GN=AMELX PE=1 SV=2	1	hf1_10472_ebo_36_1_261219.ScanId;v=1;d1=34341.34341.3	controllerType=0 controllerNumber=1 scan=34341	76.9914
18053:3	1	S.M[+31.990]PLPPHPGHPGYINF.S		M[+32]	569.278	3	1705.82	1705.82	0	1.9	17	Non	286.03	286.03	0	3.81	1509	>sp|P02817|AMELX_BOVIN Amelogenin, X isoform OS=Bos taurus OX=9913 GN=AMELX PE=1 SV=2	1	hf1_10472_ebo_36_1_261219.ScanId;v=1;d1=14800.14800.3	controllerType=0 controllerNumber=1 scan=14800	35.3237
45467:3	1	S.MP[+15.995]LPPHPGHPGYINF.S		P[+16]	563.947	3	1689.83	1689.82	0	2.8	17	Non	288.2	288.2	4	4.02	1509	>sp|P02817|AMELX_BOVIN Amelogenin, X isoform OS=Bos taurus OX=9913 GN=AMELX PE=1 SV=2	1	hf1_10472_ebo_36_1_261219.ScanId;v=1;d1=34276.34276.3	controllerType=0 controllerNumber=1 scan=34276	76.6537
17856:2	1	S.M[+15.995]PLPPHPGHPGYINF.S		M[+16]	845.418	2	1689.83	1689.82	0	4.9	17	Non	290.42	290.42	5.16	4.77	1509	>sp|P02817|AMELX_BOVIN Amelogenin, X isoform OS=Bos taurus OX=9913 GN=AMELX PE=1 SV=2	1	hf1_10472_ebo_36_1_261219.ScanId;v=1;d1=14654.14654.2	controllerType=0 controllerNumber=1 scan=14654	35.0583
17732:3	1	S.M[+31.990]PLPPHPGHPGYINF.S		M[+32]	569.278	3	1705.82	1705.82	0	1.4	17	Non	295.24	295.24	0	3.81	1509	>sp|P02817|AMELX_BOVIN Amelogenin, X isoform OS=Bos taurus OX=9913 GN=AMELX PE=1 SV=2	1	hf1_10472_ebo_36_1_261219.ScanId;v=1;d1=14565.14565.3	controllerType=0 controllerNumber=1 scan=14565	34.8882
22353:3	1	S.MP[+15.995]LPPHPGHPGYINF.S		P[+16]	563.949	3	1689.83	1689.82	0	7.2	17	Non	298.63	298.63	4	4.46	1509	>sp|P02817|AMELX_BOVIN Amelogenin, X isoform OS=Bos taurus OX=9913 GN=AMELX PE=1 SV=2	1	hf1_10472_ebo_36_1_261219.ScanId;v=1;d1=17679.17679.3	controllerType=0 controllerNumber=1 scan=17679	40.5035
16634:3	1	S.MP[+15.995]LPPHPGHPGYINF.S		P[+16]	563.95	3	1689.84	1689.82	0	9.5	17	Non	304.38	304.38	4	3.82	1509	>sp|P02817|AMELX_BOVIN Amelogenin, X isoform OS=Bos taurus OX=9913 GN=AMELX PE=1 SV=2	1	hf1_10472_ebo_36_1_261219.ScanId;v=1;d1=13781.13781.3	controllerType=0 controllerNumber=1 scan=13781	33.4865
44308:3	1	S.MP[+15.995]LPPHPGHPGYINF.S		P[+16]	563.947	3	1689.83	1689.82	0	4	17	Non	308.65	308.65	4	4.24	1509	>sp|P02817|AMELX_BOVIN Amelogenin, X isoform OS=Bos taurus OX=9913 GN=AMELX PE=1 SV=2	1	hf1_10472_ebo_36_1_261219.ScanId;v=1;d1=32405.32405.3	controllerType=0 controllerNumber=1 scan=32405	68.9009
44098:2	1	S.M[+15.995]PLPPHPGHPGYINF.S		M[+16]	845.42	2	1689.83	1689.82	0	7.4	17	Non	309.91	309.91	32.34	5.56	1509	>sp|P02817|AMELX_BOVIN Amelogenin, X isoform OS=Bos taurus OX=9913 GN=AMELX PE=1 SV=2	1	hf1_10472_ebo_36_1_261219.ScanId;v=1;d1=32171.32171.2	controllerType=0 controllerNumber=1 scan=32171	68.049
44648:3	1	S.MP[+15.995]LPPHPGHPGYINF.S		P[+16]	563.946	3	1689.82	1689.82	0	1	17	Non	311.47	311.47	4	4.03	1509	>sp|P02817|AMELX_BOVIN Amelogenin, X isoform OS=Bos taurus OX=9913 GN=AMELX PE=1 SV=2	1	hf1_10472_ebo_36_1_261219.ScanId;v=1;d1=32803.32803.3	controllerType=0 controllerNumber=1 scan=32803	70.2701
20032:3	1	S.M[+31.990]PLPPHPGHPGYINF.S		M[+32]	569.28	3	1705.83	1705.82	0	6.4	17	Non	317.06	317.06	8.46	4.46	1509	>sp|P02817|AMELX_BOVIN Amelogenin, X isoform OS=Bos taurus OX=9913 GN=AMELX PE=1 SV=2	1	hf1_10472_ebo_36_1_261219.ScanId;v=1;d1=16151.16151.3	controllerType=0 controllerNumber=1 scan=16151	37.7708
15599:3	1	S.MP[+15.995]LPPHPGHPGYINF.S		P[+16]	563.95	3	1689.84	1689.82	0	8.9	17	Non	317.37	317.37	4	3.82	1509	>sp|P02817|AMELX_BOVIN Amelogenin, X isoform OS=Bos taurus OX=9913 GN=AMELX PE=1 SV=2	1	hf1_10472_ebo_36_1_261219.ScanId;v=1;d1=13027.13027.3	controllerType=0 controllerNumber=1 scan=13027	32.1016
43999:3	1	S.MP[+15.995]LPPHPGHPGYINF.S		P[+16]	563.948	3	1689.83	1689.82	0	4.5	17	Non	320.73	320.73	4	4.91	1509	>sp|P02817|AMELX_BOVIN Amelogenin, X isoform OS=Bos taurus OX=9913 GN=AMELX PE=1 SV=2	1	hf1_10472_ebo_36_1_261219.ScanId;v=1;d1=32031.32031.3	controllerType=0 controllerNumber=1 scan=32031	67.5391
18126:2	1	S.MP[+31.990]LPPHPGHPGYINF.S		P[+32]	853.417	2	1705.83	1705.82	0	6.4	17	Non	323.5	323.5	4.05	4.85	1509	>sp|P02817|AMELX_BOVIN Amelogenin, X isoform OS=Bos taurus OX=9913 GN=AMELX PE=1 SV=2	1	hf1_10472_ebo_36_1_261219.ScanId;v=1;d1=14848.14848.2	controllerType=0 controllerNumber=1 scan=14848	35.4132
44408:3	1	S.MP[+15.995]LPPHPGHPGYINF.S		P[+16]	563.947	3	1689.83	1689.82	0	3.9	17	Non	327.24	327.24	4	4.39	1509	>sp|P02817|AMELX_BOVIN Amelogenin, X isoform OS=Bos taurus OX=9913 GN=AMELX PE=1 SV=2	1	hf1_10472_ebo_36_1_261219.ScanId;v=1;d1=32517.32517.3	controllerType=0 controllerNumber=1 scan=32517	69.2572
44567:3	1	S.MP[+15.995]LPPHPGHPGYINF.S		P[+16]	563.947	3	1689.83	1689.82	0	4.4	17	Non	330.7	330.7	4	4.69	1509	>sp|P02817|AMELX_BOVIN Amelogenin, X isoform OS=Bos taurus OX=9913 GN=AMELX PE=1 SV=2	1	hf1_10472_ebo_36_1_261219.ScanId;v=1;d1=32708.32708.3	controllerType=0 controllerNumber=1 scan=32708	69.9297
43809:3	1	S.MP[+15.995]LPPHPGHPGYINF.S		P[+16]	563.946	3	1689.82	1689.82	0	1.9	17	Non	330.97	330.97	4	4.18	1509	>sp|P02817|AMELX_BOVIN Amelogenin, X isoform OS=Bos taurus OX=9913 GN=AMELX PE=1 SV=2	1	hf1_10472_ebo_36_1_261219.ScanId;v=1;d1=31749.31749.3	controllerType=0 controllerNumber=1 scan=31749	66.5151
21980:3	1	S.MP[+15.995]LPPHPGHPGYINF.S		P[+16]	563.948	3	1689.83	1689.82	0	4.7	17	Non	335.89	335.89	4	4.69	1509	>sp|P02817|AMELX_BOVIN Amelogenin, X isoform OS=Bos taurus OX=9913 GN=AMELX PE=1 SV=2	1	hf1_10472_ebo_36_1_261219.ScanId;v=1;d1=17445.17445.3	controllerType=0 controllerNumber=1 scan=17445	40.0935
44781:3	1	S.MP[+15.995]LPPHPGHPGYINF.S		P[+16]	563.948	3	1689.83	1689.82	0	4.6	17	Non	338.94	338.94	4	4.91	1509	>sp|P02817|AMELX_BOVIN Amelogenin, X isoform OS=Bos taurus OX=9913 GN=AMELX PE=1 SV=2	1	hf1_10472_ebo_36_1_261219.ScanId;v=1;d1=32977.32977.3	controllerType=0 controllerNumber=1 scan=32977	70.9433
17169:3	1	S.MP[+15.995]LPPHPGHPGYINF.S		P[+16]	563.949	3	1689.83	1689.82	0	7.3	17	Non	345.55	345.55	4	4.61	1509	>sp|P02817|AMELX_BOVIN Amelogenin, X isoform OS=Bos taurus OX=9913 GN=AMELX PE=1 SV=2	1	hf1_10472_ebo_36_1_261219.ScanId;v=1;d1=14160.14160.3	controllerType=0 controllerNumber=1 scan=14160	34.178
19209:2	1	S.M[+31.990]PLPPHPGHPGYINF.S		M[+32]	853.415	2	1705.82	1705.82	0	3.8	17	Non	346.25	346.25	0	4.41	1509	>sp|P02817|AMELX_BOVIN Amelogenin, X isoform OS=Bos taurus OX=9913 GN=AMELX PE=1 SV=2	1	hf1_10472_ebo_36_1_261219.ScanId;v=1;d1=15613.15613.2	controllerType=0 controllerNumber=1 scan=15613	36.8068
43942:3	1	S.MP[+15.995]LPPHPGHPGYINF.S		P[+16]	563.946	3	1689.82	1689.82	0	1.3	17	Non	350.8	350.8	4	4.24	1509	>sp|P02817|AMELX_BOVIN Amelogenin, X isoform OS=Bos taurus OX=9913 GN=AMELX PE=1 SV=2	1	hf1_10472_ebo_36_1_261219.ScanId;v=1;d1=31940.31940.3	controllerType=0 controllerNumber=1 scan=31940	67.1974
18806:3	1	S.M[+15.995]PLPPHPGHPGYINF.S		M[+16]	563.949	3	1689.83	1689.82	0	7.1	17	Non	353.63	353.63	4.58	4.84	1509	>sp|P02817|AMELX_BOVIN Amelogenin, X isoform OS=Bos taurus OX=9913 GN=AMELX PE=1 SV=2	1	hf1_10472_ebo_36_1_261219.ScanId;v=1;d1=15338.15338.3	controllerType=0 controllerNumber=1 scan=15338	36.3087
44906:3	1	S.MP[+15.995]LPPHPGHPGYINF.S		P[+16]	563.946	3	1689.82	1689.82	0	1	17	Non	355.47	355.47	4	4.24	1509	>sp|P02817|AMELX_BOVIN Amelogenin, X isoform OS=Bos taurus OX=9913 GN=AMELX PE=1 SV=2	1	hf1_10472_ebo_36_1_261219.ScanId;v=1;d1=33155.33155.3	controllerType=0 controllerNumber=1 scan=33155	71.6287
18546:3	1	S.MP[+15.995]LPPHPGHPGYINF.S		P[+16]	563.95	3	1689.84	1689.82	0	8.7	17	Non	357.55	357.55	4	4.19	1509	>sp|P02817|AMELX_BOVIN Amelogenin, X isoform OS=Bos taurus OX=9913 GN=AMELX PE=1 SV=2	1	hf1_10472_ebo_36_1_261219.ScanId;v=1;d1=15152.15152.3	controllerType=0 controllerNumber=1 scan=15152	35.959
18015:3	1	S.MP[+15.995]LPPHPGHPGYINF.S		P[+16]	563.95	3	1689.83	1689.82	0	8	17	Non	362.4	362.4	4	5.75	1509	>sp|P02817|AMELX_BOVIN Amelogenin, X isoform OS=Bos taurus OX=9913 GN=AMELX PE=1 SV=2	1	hf1_10472_ebo_36_1_261219.ScanId;v=1;d1=14772.14772.3	controllerType=0 controllerNumber=1 scan=14772	35.2705
18274:3	1	S.MP[+15.995]LPPHPGHPGYINF.S		P[+16]	563.949	3	1689.83	1689.82	0	7.8	17	Non	364.8	364.8	4	5.75	1509	>sp|P02817|AMELX_BOVIN Amelogenin, X isoform OS=Bos taurus OX=9913 GN=AMELX PE=1 SV=2	1	hf1_10472_ebo_36_1_261219.ScanId;v=1;d1=14962.14962.3	controllerType=0 controllerNumber=1 scan=14962	35.6183
44959:3	1	S.MP[+15.995]LPPHPGHPGYINF.S		P[+16]	563.946	3	1689.82	1689.82	0	0.8	17	Non	370.81	370.81	4	5.09	1509	>sp|P02817|AMELX_BOVIN Amelogenin, X isoform OS=Bos taurus OX=9913 GN=AMELX PE=1 SV=2	1	hf1_10472_ebo_36_1_261219.ScanId;v=1;d1=33241.33241.3	controllerType=0 controllerNumber=1 scan=33241	71.9653
44492:3	1	S.MP[+15.995]LPPHPGHPGYINF.S		P[+16]	563.948	3	1689.83	1689.82	0	4.5	17	Non	372.23	372.23	4	5.88	1509	>sp|P02817|AMELX_BOVIN Amelogenin, X isoform OS=Bos taurus OX=9913 GN=AMELX PE=1 SV=2	1	hf1_10472_ebo_36_1_261219.ScanId;v=1;d1=32615.32615.3	controllerType=0 controllerNumber=1 scan=32615	69.5936
19728:3	1	S.M[+31.990]PLPPHPGHPGYINF.S		M[+32]	569.279	3	1705.82	1705.82	0	4.8	17	Non	377.86	377.86	8.34	5.6	1509	>sp|P02817|AMELX_BOVIN Amelogenin, X isoform OS=Bos taurus OX=9913 GN=AMELX PE=1 SV=2	1	hf1_10472_ebo_36_1_261219.ScanId;v=1;d1=15952.15952.3	controllerType=0 controllerNumber=1 scan=15952	37.4168
17434:3	1	S.MP[+15.995]LPPHPGHPGYINF.S		P[+16]	563.949	3	1689.83	1689.82	0	6.5	17	Non	380.7	380.7	4	5.75	1509	>sp|P02817|AMELX_BOVIN Amelogenin, X isoform OS=Bos taurus OX=9913 GN=AMELX PE=1 SV=2	1	hf1_10472_ebo_36_1_261219.ScanId;v=1;d1=14353.14353.3	controllerType=0 controllerNumber=1 scan=14353	34.5182
18319:3	1	S.M[+31.990]PLPPHPGHPGYINF.S		M[+32]	569.278	3	1705.82	1705.82	0	3.1	17	Non	385.12	385.12	8.45	5.36	1509	>sp|P02817|AMELX_BOVIN Amelogenin, X isoform OS=Bos taurus OX=9913 GN=AMELX PE=1 SV=2	1	hf1_10472_ebo_36_1_261219.ScanId;v=1;d1=14992.14992.3	controllerType=0 controllerNumber=1 scan=14992	35.6729
18812:2	1	S.M[+31.990]PLPPHPGHPGYINF.S		M[+32]	853.418	2	1705.83	1705.82	0	8.1	17	Non	385.17	385.17	3.13	5.99	1509	>sp|P02817|AMELX_BOVIN Amelogenin, X isoform OS=Bos taurus OX=9913 GN=AMELX PE=1 SV=2	1	hf1_10472_ebo_36_1_261219.ScanId;v=1;d1=15341.15341.2	controllerType=0 controllerNumber=1 scan=15341	36.3122
21639:3	1	S.MP[+15.995]LPPHPGHPGYINF.S		P[+16]	563.948	3	1689.83	1689.82	0	5	17	Non	386.01	368.99	5.8	5.82	1509	>sp|P02817|AMELX_BOVIN Amelogenin, X isoform OS=Bos taurus OX=9913 GN=AMELX PE=1 SV=2	1	hf1_10472_ebo_36_1_261219.ScanId;v=1;d1=17227.17227.3	controllerType=0 controllerNumber=1 scan=17227	39.7067
19018:2	1	S.M[+15.995]PLPPHPGHPGYINF.S		M[+16]	845.418	2	1689.83	1689.82	0	4.7	17	Non	395.99	395.99	35.66	6.12	1509	>sp|P02817|AMELX_BOVIN Amelogenin, X isoform OS=Bos taurus OX=9913 GN=AMELX PE=1 SV=2	1	hf1_10472_ebo_36_1_261219.ScanId;v=1;d1=15484.15484.2	controllerType=0 controllerNumber=1 scan=15484	36.5696
15477:2	1	S.M[+15.995]PLPPHPGHPGYINF.S		M[+16]	845.421	2	1689.83	1689.82	0	7.9	17	Non	398.6	295	37.2	4.75	1509	>sp|P02817|AMELX_BOVIN Amelogenin, X isoform OS=Bos taurus OX=9913 GN=AMELX PE=1 SV=2	1	hf1_10472_ebo_36_1_261219.ScanId;v=1;d1=12948.12948.3	controllerType=0 controllerNumber=1 scan=12948	31.9613
19137:3	1	S.M[+31.990]PLPPHPGHPGYINF.S		M[+32]	569.28	3	1705.82	1705.82	0	5.1	17	Non	399.81	399.81	8.48	5.82	1509	>sp|P02817|AMELX_BOVIN Amelogenin, X isoform OS=Bos taurus OX=9913 GN=AMELX PE=1 SV=2	1	hf1_10472_ebo_36_1_261219.ScanId;v=1;d1=15566.15566.3	controllerType=0 controllerNumber=1 scan=15566	36.7172
21331:3	1	S.MP[+15.995]LPPHPGHPGYINF.S		P[+16]	563.947	3	1689.83	1689.82	0	4.4	17	Non	399.84	399.84	5.8	5.82	1509	>sp|P02817|AMELX_BOVIN Amelogenin, X isoform OS=Bos taurus OX=9913 GN=AMELX PE=1 SV=2	1	hf1_10472_ebo_36_1_261219.ScanId;v=1;d1=17025.17025.3	controllerType=0 controllerNumber=1 scan=17025	39.3473
19440:3	1	S.M[+31.990]PLPPHPGHPGYINF.S		M[+32]	569.28	3	1705.82	1705.82	0	5.1	17	Non	411.3	411.3	8.82	5.9	1509	>sp|P02817|AMELX_BOVIN Amelogenin, X isoform OS=Bos taurus OX=9913 GN=AMELX PE=1 SV=2	1	hf1_10472_ebo_36_1_261219.ScanId;v=1;d1=15764.15764.3	controllerType=0 controllerNumber=1 scan=15764	37.0793
19972:2	1	S.M[+15.995]PLPPHPGHPGYINF.S		M[+16]	845.418	2	1689.83	1689.82	0	5.2	17	Non	419.17	364.62	18.52	5.85	1509	>sp|P02817|AMELX_BOVIN Amelogenin, X isoform OS=Bos taurus OX=9913 GN=AMELX PE=1 SV=2	1	hf1_10472_ebo_36_1_261219.ScanId;v=1;d1=16113.16113.2	controllerType=0 controllerNumber=1 scan=16113	37.7026
18862:3	1	S.M[+31.990]PLPPHPGHPGYINF.S		M[+32]	569.28	3	1705.83	1705.82	0	5.7	17	Non	422.16	422.16	8.29	5.84	1509	>sp|P02817|AMELX_BOVIN Amelogenin, X isoform OS=Bos taurus OX=9913 GN=AMELX PE=1 SV=2	1	hf1_10472_ebo_36_1_261219.ScanId;v=1;d1=15374.15374.3	controllerType=0 controllerNumber=1 scan=15374	36.3718
18553:2	1	S.MP[+31.990]LPPHPGHPGYINF.S		P[+32]	853.415	2	1705.82	1705.82	0	4.3	17	Non	428.57	428.57	0	5.85	1509	>sp|P02817|AMELX_BOVIN Amelogenin, X isoform OS=Bos taurus OX=9913 GN=AMELX PE=1 SV=2	1	hf1_10472_ebo_36_1_261219.ScanId;v=1;d1=15156.15156.2	controllerType=0 controllerNumber=1 scan=15156	35.9644
21034:3	1	S.MP[+15.995]LPPHPGHPGYINF.S		P[+16]	563.947	3	1689.83	1689.82	0	4.1	17	Non	434.59	425.86	5.8	5.31	1509	>sp|P02817|AMELX_BOVIN Amelogenin, X isoform OS=Bos taurus OX=9913 GN=AMELX PE=1 SV=2	1	hf1_10472_ebo_36_1_261219.ScanId;v=1;d1=16831.16831.3	controllerType=0 controllerNumber=1 scan=16831	38.9954
19301:2	1	S.M[+15.995]PLPPHPGHPGYINF.S		M[+16]	845.418	2	1689.83	1689.82	0	4.9	17	Non	448.18	448.18	29.74	5.87	1509	>sp|P02817|AMELX_BOVIN Amelogenin, X isoform OS=Bos taurus OX=9913 GN=AMELX PE=1 SV=2	1	hf1_10472_ebo_36_1_261219.ScanId;v=1;d1=15671.15671.2	controllerType=0 controllerNumber=1 scan=15671	36.9118
20251:3	1	S.MPLP[+15.995]PHPGHPGYINF.S		P[+16]	563.948	3	1689.83	1689.82	0	4.9	17	Non	457.62	457.62	8.73	5.86	1509	>sp|P02817|AMELX_BOVIN Amelogenin, X isoform OS=Bos taurus OX=9913 GN=AMELX PE=1 SV=2	1	hf1_10472_ebo_36_1_261219.ScanId;v=1;d1=16294.16294.3	controllerType=0 controllerNumber=1 scan=16294	38.033
18594:3	1	S.M[+31.990]PLPPHPGHPGYINF.S		M[+32]	569.279	3	1705.82	1705.82	0	4.2	17	Non	458.89	458.89	8.43	5.48	1509	>sp|P02817|AMELX_BOVIN Amelogenin, X isoform OS=Bos taurus OX=9913 GN=AMELX PE=1 SV=2	1	hf1_10472_ebo_36_1_261219.ScanId;v=1;d1=15184.15184.3	controllerType=0 controllerNumber=1 scan=15184	36.0189
17712:3	1	S.MP[+15.995]LPPHPGHPGYINF.S		P[+16]	563.949	3	1689.83	1689.82	0	7.5	17	Non	459.18	459.18	4	5.84	1509	>sp|P02817|AMELX_BOVIN Amelogenin, X isoform OS=Bos taurus OX=9913 GN=AMELX PE=1 SV=2	1	hf1_10472_ebo_36_1_261219.ScanId;v=1;d1=14549.14549.3	controllerType=0 controllerNumber=1 scan=14549	34.8669
22686:3	1	S.MPLPPHPGHPGYIN[+0.984]F.S		N[+1]	558.944	3	1674.82	1674.81	0	4.3	17	Non	460.6	460.6	460.6	5.92	1509	>sp|P02817|AMELX_BOVIN Amelogenin, X isoform OS=Bos taurus OX=9913 GN=AMELX PE=1 SV=2	1	hf1_10472_ebo_36_1_261219.ScanId;v=1;d1=17896.17896.3	controllerType=0 controllerNumber=1 scan=17896	40.8854
19958:3	1	S.MP[+15.995]LPPHPGHPGYINF.S		P[+16]	563.948	3	1689.83	1689.82	0	5.8	17	Non	468.9	468.9	5.8	5.86	1509	>sp|P02817|AMELX_BOVIN Amelogenin, X isoform OS=Bos taurus OX=9913 GN=AMELX PE=1 SV=2	1	hf1_10472_ebo_36_1_261219.ScanId;v=1;d1=16102.16102.3	controllerType=0 controllerNumber=1 scan=16102	37.6833
16614:2	1	S.M[+15.995]PLPPHPGHPGYINF.S		M[+16]	845.418	2	1689.83	1689.82	0	4.2	17	Non	474.52	411.74	41.08	5.58	1509	>sp|P02817|AMELX_BOVIN Amelogenin, X isoform OS=Bos taurus OX=9913 GN=AMELX PE=1 SV=2	1	hf1_10472_ebo_36_1_261219.ScanId;v=1;d1=13766.13766.2	controllerType=0 controllerNumber=1 scan=13766	33.456
21749:3	1	S.MPLPPHPGHPGYIN[+0.984]F.S		N[+1]	558.945	3	1674.82	1674.81	0	5.9	17	Non	520.09	520.09	520.09	6.17	1509	>sp|P02817|AMELX_BOVIN Amelogenin, X isoform OS=Bos taurus OX=9913 GN=AMELX PE=1 SV=2	1	hf1_10472_ebo_36_1_261219.ScanId;v=1;d1=17304.17304.3	controllerType=0 controllerNumber=1 scan=17304	39.846
16880:2	1	S.M[+15.995]PLPPHPGHPGYINF.S		M[+16]	845.418	2	1689.83	1689.82	0	5.1	17	Non	523.05	417.8	61.07	6.33	1509	>sp|P02817|AMELX_BOVIN Amelogenin, X isoform OS=Bos taurus OX=9913 GN=AMELX PE=1 SV=2	1	hf1_10472_ebo_36_1_261219.ScanId;v=1;d1=13959.13959.2	controllerType=0 controllerNumber=1 scan=13959	33.8094
22159:2	1	S.MPLPPHPGHPGYIN[+0.984]F.S		N[+1]	837.915	2	1674.82	1674.81	0	7.9	17	Non	523.12	477.45	477.45	6.2	1509	>sp|P02817|AMELX_BOVIN Amelogenin, X isoform OS=Bos taurus OX=9913 GN=AMELX PE=1 SV=2	1	hf1_10472_ebo_36_1_261219.ScanId;v=1;d1=17557.17557.2	controllerType=0 controllerNumber=1 scan=17557	40.2887
21452:3	1	S.MPLPPHPGHPGYIN[+0.984]F.S		N[+1]	558.945	3	1674.82	1674.81	0	6.1	17	Non	530.26	530.26	530.26	6.17	1509	>sp|P02817|AMELX_BOVIN Amelogenin, X isoform OS=Bos taurus OX=9913 GN=AMELX PE=1 SV=2	1	hf1_10472_ebo_36_1_261219.ScanId;v=1;d1=17104.17104.3	controllerType=0 controllerNumber=1 scan=17104	39.4929
22383:3	1	S.MPLPPHPGHPGYIN[+0.984]F.S		N[+1]	558.944	3	1674.82	1674.81	0	5.2	17	Non	537.66	537.66	537.66	6.17	1509	>sp|P02817|AMELX_BOVIN Amelogenin, X isoform OS=Bos taurus OX=9913 GN=AMELX PE=1 SV=2	1	hf1_10472_ebo_36_1_261219.ScanId;v=1;d1=17699.17699.3	controllerType=0 controllerNumber=1 scan=17699	40.539
18742:2	1	S.M[+15.995]PLPPHPGHPGYINF.S		M[+16]	845.419	2	1689.83	1689.82	0	5.6	17	Non	549.69	520.6	48.8	6.41	1509	>sp|P02817|AMELX_BOVIN Amelogenin, X isoform OS=Bos taurus OX=9913 GN=AMELX PE=1 SV=2	1	hf1_10472_ebo_36_1_261219.ScanId;v=1;d1=15290.15290.2	controllerType=0 controllerNumber=1 scan=15290	36.2225
18222:2	1	S.M[+15.995]PLPPHPGHPGYINF.S		M[+16]	845.418	2	1689.83	1689.82	0	4.8	17	Non	552.6	501.68	54.83	6.33	1509	>sp|P02817|AMELX_BOVIN Amelogenin, X isoform OS=Bos taurus OX=9913 GN=AMELX PE=1 SV=2	1	hf1_10472_ebo_36_1_261219.ScanId;v=1;d1=14921.14921.2	controllerType=0 controllerNumber=1 scan=14921	35.5471
21286:2	1	S.MPLPPHPGHPGYIN[+0.984]F.S		N[+1]	837.914	2	1674.82	1674.81	0	6.7	17	Non	584.58	536.62	536.62	6.99	1509	>sp|P02817|AMELX_BOVIN Amelogenin, X isoform OS=Bos taurus OX=9913 GN=AMELX PE=1 SV=2	1	hf1_10472_ebo_36_1_261219.ScanId;v=1;d1=16996.16996.2	controllerType=0 controllerNumber=1 scan=16996	39.2959
18496:2	1	S.M[+15.995]PLPPHPGHPGYINF.S		M[+16]	845.419	2	1689.83	1689.82	0	5.8	17	Non	585.22	559.85	68.05	7.21	1509	>sp|P02817|AMELX_BOVIN Amelogenin, X isoform OS=Bos taurus OX=9913 GN=AMELX PE=1 SV=2	1	hf1_10472_ebo_36_1_261219.ScanId;v=1;d1=15112.15112.2	controllerType=0 controllerNumber=1 scan=15112	35.8872
22064:3	1	S.MPLPPHPGHPGYIN[+0.984]F.S		N[+1]	558.945	3	1674.82	1674.81	0	6.1	17	Non	595.11	591.16	591.16	7.46	1509	>sp|P02817|AMELX_BOVIN Amelogenin, X isoform OS=Bos taurus OX=9913 GN=AMELX PE=1 SV=2	1	hf1_10472_ebo_36_1_261219.ScanId;v=1;d1=17496.17496.3	controllerType=0 controllerNumber=1 scan=17496	40.1836
17953:2	1	S.M[+15.995]PLPPHPGHPGYINF.S		M[+16]	845.418	2	1689.83	1689.82	0	4.2	17	Non	601.07	555.02	46.33	7.69	1509	>sp|P02817|AMELX_BOVIN Amelogenin, X isoform OS=Bos taurus OX=9913 GN=AMELX PE=1 SV=2	1	hf1_10472_ebo_36_1_261219.ScanId;v=1;d1=14727.14727.2	controllerType=0 controllerNumber=1 scan=14727	35.1955
17159:2	1	S.M[+15.995]PLPPHPGHPGYINF.S		M[+16]	845.418	2	1689.83	1689.82	0	4.3	17	Non	608.45	505.54	68.18	8.21	1509	>sp|P02817|AMELX_BOVIN Amelogenin, X isoform OS=Bos taurus OX=9913 GN=AMELX PE=1 SV=2	1	hf1_10472_ebo_36_1_261219.ScanId;v=1;d1=14151.14151.2	controllerType=0 controllerNumber=1 scan=14151	34.1591
17696:2	1	S.M[+15.995]PLPPHPGHPGYINF.S		M[+16]	845.418	2	1689.83	1689.82	0	4.9	17	Non	637.77	579.73	67.86	8.21	1509	>sp|P02817|AMELX_BOVIN Amelogenin, X isoform OS=Bos taurus OX=9913 GN=AMELX PE=1 SV=2	1	hf1_10472_ebo_36_1_261219.ScanId;v=1;d1=14538.14538.2	controllerType=0 controllerNumber=1 scan=14538	34.848
21721:2	1	S.MPLPPHPGHPGYIN[+0.984]F.S		N[+1]	837.913	2	1674.82	1674.81	0	5.8	17	Non	644.61	589.19	589.19	8.21	1509	>sp|P02817|AMELX_BOVIN Amelogenin, X isoform OS=Bos taurus OX=9913 GN=AMELX PE=1 SV=2	1	hf1_10472_ebo_36_1_261219.ScanId;v=1;d1=17282.17282.2	controllerType=0 controllerNumber=1 scan=17282	39.8046
21685:2	1	S.MPLPPHPGHPGYIN[+0.984]F.S		N[+1]	837.911	2	1674.82	1674.81	0	3.5	17	Non	647.78	609.46	609.46	7.6	1509	>sp|P02817|AMELX_BOVIN Amelogenin, X isoform OS=Bos taurus OX=9913 GN=AMELX PE=1 SV=2	1	hf1_10472_ebo_36_1_261219.ScanId;v=1;d1=17257.17257.4	controllerType=0 controllerNumber=1 scan=17257	39.759
17421:2	1	S.M[+15.995]PLPPHPGHPGYINF.S		M[+16]	845.417	2	1689.83	1689.82	0	4.1	17	Non	648.69	550.12	68.22	7.69	1509	>sp|P02817|AMELX_BOVIN Amelogenin, X isoform OS=Bos taurus OX=9913 GN=AMELX PE=1 SV=2	1	hf1_10472_ebo_36_1_261219.ScanId;v=1;d1=14342.14342.2	controllerType=0 controllerNumber=1 scan=14342	34.5007
16435:3	1	S.MP[+15.995]LP[+31.990]PHPGHPGYINF.S		P[+16][+32]	574.61	3	1721.82	1721.81	0	2.8	17	Non	137.74	137.74	4	0.95	1509	>sp|P02817|AMELX_BOVIN Amelogenin, X isoform OS=Bos taurus OX=9913 GN=AMELX PE=1 SV=2	1	hf1_10472_ebo_36_1_261219.ScanId;v=1;d1=13631.13631.3	controllerType=0 controllerNumber=1 scan=13631	33.203
17172:3	1	S.M[+31.990]PLPPHPGHPGYIN[+0.984]F.S		M[+32], N[+1]	569.607	3	1706.81	1706.8	0	4.4	17	Non	152.57	149.05	0	2.27	1509	>sp|P02817|AMELX_BOVIN Amelogenin, X isoform OS=Bos taurus OX=9913 GN=AMELX PE=1 SV=2	1	hf1_10472_ebo_36_1_261219.ScanId;v=1;d1=14162.14162.3	controllerType=0 controllerNumber=1 scan=14162	34.1797
22288:2	1	S.M[+15.995]PLPPHP[+15.995]GHPGYINF.S		M[+16], P[+16]	853.412	2	1705.82	1705.82	0	0.7	17	Non	161.89	161.89	4.79	2.23	1509	>sp|P02817|AMELX_BOVIN Amelogenin, X isoform OS=Bos taurus OX=9913 GN=AMELX PE=1 SV=2	1	hf1_10472_ebo_36_1_261219.ScanId;v=1;d1=17639.17639.2	controllerType=0 controllerNumber=1 scan=17639	40.4326
21388:2	1	S.M[+15.995]PLPPHP[+15.995]GHPGYINF.S		M[+16], P[+16]	853.416	2	1705.82	1705.82	0	5.2	17	Non	170.12	170.12	2.02	2.87	1509	>sp|P02817|AMELX_BOVIN Amelogenin, X isoform OS=Bos taurus OX=9913 GN=AMELX PE=1 SV=2	1	hf1_10472_ebo_36_1_261219.ScanId;v=1;d1=17063.17063.3	controllerType=0 controllerNumber=1 scan=17063	39.4148
17063:3	1	S.MP[+15.995]LP[+31.990]PHPGHPGYINF.S		P[+16][+32]	574.611	3	1721.82	1721.81	0	4.8	17	Non	170.44	170.44	0	2.69	1509	>sp|P02817|AMELX_BOVIN Amelogenin, X isoform OS=Bos taurus OX=9913 GN=AMELX PE=1 SV=2	1	hf1_10472_ebo_36_1_261219.ScanId;v=1;d1=14086.14086.3	controllerType=0 controllerNumber=1 scan=14086	34.0395
15858:3	1	S.MP[+15.995]LPPHPGHP[+15.995]GYINF.S		P[+16]*2	569.279	3	1705.82	1705.82	0	3.9	17	Non	251.27	251.27	3.72	3.85	1509	>sp|P02817|AMELX_BOVIN Amelogenin, X isoform OS=Bos taurus OX=9913 GN=AMELX PE=1 SV=2	1	hf1_10472_ebo_36_1_261219.ScanId;v=1;d1=13220.13220.3	controllerType=0 controllerNumber=1 scan=13220	32.4534
17171:3	1	S.MP[+15.995]LPPHP[+15.995]GHPGYINF.S		P[+16]*2	569.279	3	1705.82	1705.82	0	3.9	17	Non	271.66	271.66	4	3.85	1509	>sp|P02817|AMELX_BOVIN Amelogenin, X isoform OS=Bos taurus OX=9913 GN=AMELX PE=1 SV=2	1	hf1_10472_ebo_36_1_261219.ScanId;v=1;d1=14162.14162.3	controllerType=0 controllerNumber=1 scan=14162	34.1797
21475:2	1	S.M[+15.995]PLPPHPGH[+15.995]PGYINF.S		H[+16], M[+16]	853.417	2	1705.83	1705.82	0	6.2	17	Non	272.53	272.53	10.94	4.15	1509	>sp|P02817|AMELX_BOVIN Amelogenin, X isoform OS=Bos taurus OX=9913 GN=AMELX PE=1 SV=2	1	hf1_10472_ebo_36_1_261219.ScanId;v=1;d1=17120.17120.2	controllerType=0 controllerNumber=1 scan=17120	39.5198
16116:3	1	S.MP[+15.995]LPPHPGHP[+15.995]GYINF.S		P[+16]*2	569.278	3	1705.82	1705.82	0	1.4	17	Non	276.08	276.08	4	3.64	1509	>sp|P02817|AMELX_BOVIN Amelogenin, X isoform OS=Bos taurus OX=9913 GN=AMELX PE=1 SV=2	1	hf1_10472_ebo_36_1_261219.ScanId;v=1;d1=13410.13410.3	controllerType=0 controllerNumber=1 scan=13410	32.8033
17454:3	1	S.MP[+15.995]LPPH[+15.995]PGHPGYINF.S		H[+16], P[+16]	569.279	3	1705.82	1705.82	0	4.2	17	Non	284.74	284.74	0.51	4.02	1509	>sp|P02817|AMELX_BOVIN Amelogenin, X isoform OS=Bos taurus OX=9913 GN=AMELX PE=1 SV=2	1	hf1_10472_ebo_36_1_261219.ScanId;v=1;d1=14367.14367.3	controllerType=0 controllerNumber=1 scan=14367	34.5395
18490:2	1	S.M[+15.995]PLPPHPGHPGYIN[+0.984]F.S		M[+16], N[+1]	845.91	2	1690.81	1690.8	0	5	17	Non	302.06	276	9.93	4.7	1509	>sp|P02817|AMELX_BOVIN Amelogenin, X isoform OS=Bos taurus OX=9913 GN=AMELX PE=1 SV=2	1	hf1_10472_ebo_36_1_261219.ScanId;v=1;d1=15106.15106.2	controllerType=0 controllerNumber=1 scan=15106	35.8754
21332:3	1	S.MP[+15.995]LPPHPGHPGYIN[+0.984]F.S		N[+1], P[+16]	564.277	3	1690.82	1690.8	0	6.3	17	Non	344.42	344.42	5.8	4.61	1509	>sp|P02817|AMELX_BOVIN Amelogenin, X isoform OS=Bos taurus OX=9913 GN=AMELX PE=1 SV=2	1	hf1_10472_ebo_36_1_261219.ScanId;v=1;d1=17025.17025.3	controllerType=0 controllerNumber=1 scan=17025	39.3473
16635:3	1	S.MP[+15.995]LPPHPGHP[+15.995]GYINF.S		P[+16]*2	569.278	3	1705.82	1705.82	0	2.8	17	Non	352.51	352.51	4	4.17	1509	>sp|P02817|AMELX_BOVIN Amelogenin, X isoform OS=Bos taurus OX=9913 GN=AMELX PE=1 SV=2	1	hf1_10472_ebo_36_1_261219.ScanId;v=1;d1=13782.13782.3	controllerType=0 controllerNumber=1 scan=13782	33.4871
16897:3	1	S.MP[+15.995]LPPHP[+15.995]GHPGYINF.S		P[+16]*2	569.278	3	1705.82	1705.82	0	2.2	17	Non	368.14	368.14	2	4.87	1509	>sp|P02817|AMELX_BOVIN Amelogenin, X isoform OS=Bos taurus OX=9913 GN=AMELX PE=1 SV=2	1	hf1_10472_ebo_36_1_261219.ScanId;v=1;d1=13973.13973.3	controllerType=0 controllerNumber=1 scan=13973	33.8341
16389:3	1	S.MP[+15.995]LPPHPGHP[+15.995]GYINF.S		P[+16]*2	569.279	3	1705.82	1705.82	0	3.2	17	Non	387.64	387.64	4	5.36	1509	>sp|P02817|AMELX_BOVIN Amelogenin, X isoform OS=Bos taurus OX=9913 GN=AMELX PE=1 SV=2	1	hf1_10472_ebo_36_1_261219.ScanId;v=1;d1=13601.13601.3	controllerType=0 controllerNumber=1 scan=13601	33.1503
19657:3	1	S.MP[+15.995]LPPHPGHPGYIN[+0.984]F.S		N[+1], P[+16]	564.274	3	1690.81	1690.8	0	2.3	17	Non	390.41	390.41	4.71	5.3	1509	>sp|P02817|AMELX_BOVIN Amelogenin, X isoform OS=Bos taurus OX=9913 GN=AMELX PE=1 SV=2	1	hf1_10472_ebo_36_1_261219.ScanId;v=1;d1=15905.15905.3	controllerType=0 controllerNumber=1 scan=15905	37.3346
18275:3	1	S.MP[+15.995]LPPHPGHPGYIN[+0.984]F.S		N[+1], P[+16]	564.279	3	1690.82	1690.8	0	9.7	17	Non	445.4	445.4	4	5.19	1509	>sp|P02817|AMELX_BOVIN Amelogenin, X isoform OS=Bos taurus OX=9913 GN=AMELX PE=1 SV=2	1	hf1_10472_ebo_36_1_261219.ScanId;v=1;d1=14962.14962.3	controllerType=0 controllerNumber=1 scan=14962	35.6183
19373:3	1	S.MP[+15.995]LPPHPGHPGYIN[+0.984]F.S		N[+1], P[+16]	564.276	3	1690.81	1690.8	0	5	17	Non	459.41	459.41	4	5.92	1509	>sp|P02817|AMELX_BOVIN Amelogenin, X isoform OS=Bos taurus OX=9913 GN=AMELX PE=1 SV=2	1	hf1_10472_ebo_36_1_261219.ScanId;v=1;d1=15718.15718.3	controllerType=0 controllerNumber=1 scan=15718	36.9944
18807:3	1	S.M[+15.995]PLPPHPGHPGYIN[+0.984]F.S		M[+16], N[+1]	564.278	3	1690.82	1690.8	0	8.6	17	Non	461.59	461.59	13.92	5.19	1509	>sp|P02817|AMELX_BOVIN Amelogenin, X isoform OS=Bos taurus OX=9913 GN=AMELX PE=1 SV=2	1	hf1_10472_ebo_36_1_261219.ScanId;v=1;d1=15338.15338.3	controllerType=0 controllerNumber=1 scan=15338	36.3087
16141:2	1	S.M[+15.995]PLPPHPGHP[+15.995]GYINF.S		M[+16], P[+16]	853.414	2	1705.82	1705.82	0	3	17	Non	470.24	470.24	7.37	5.35	1509	>sp|P02817|AMELX_BOVIN Amelogenin, X isoform OS=Bos taurus OX=9913 GN=AMELX PE=1 SV=2	1	hf1_10472_ebo_36_1_261219.ScanId;v=1;d1=13429.13429.2	controllerType=0 controllerNumber=1 scan=13429	32.8401
19587:2	1	S.M[+15.995]PLPPHPGHPGYIN[+0.984]F.S		M[+16], N[+1]	845.911	2	1690.81	1690.8	0	5.5	17	Non	479.03	411.1	52.23	5.87	1509	>sp|P02817|AMELX_BOVIN Amelogenin, X isoform OS=Bos taurus OX=9913 GN=AMELX PE=1 SV=2	1	hf1_10472_ebo_36_1_261219.ScanId;v=1;d1=15859.15859.2	controllerType=0 controllerNumber=1 scan=15859	37.2537
19084:3	1	S.MP[+15.995]LPPHPGHPGYIN[+0.984]F.S		N[+1], P[+16]	564.277	3	1690.82	1690.8	0	6.3	17	Non	485.06	485.06	4	5.96	1509	>sp|P02817|AMELX_BOVIN Amelogenin, X isoform OS=Bos taurus OX=9913 GN=AMELX PE=1 SV=2	1	hf1_10472_ebo_36_1_261219.ScanId;v=1;d1=15530.15530.3	controllerType=0 controllerNumber=1 scan=15530	36.653
16669:2	1	S.M[+15.995]PLPPHPGHP[+15.995]GYINF.S		M[+16], P[+16]	853.414	2	1705.82	1705.82	0	2.6	17	Non	512.8	512.8	7.14	5.67	1509	>sp|P02817|AMELX_BOVIN Amelogenin, X isoform OS=Bos taurus OX=9913 GN=AMELX PE=1 SV=2	1	hf1_10472_ebo_36_1_261219.ScanId;v=1;d1=13809.13809.2	controllerType=0 controllerNumber=1 scan=13809	33.534
16936:2	1	S.M[+15.995]PLPP[+15.995]HPGHPGYINF.S		M[+16], P[+16]	853.418	2	1705.83	1705.82	0	7.8	17	Non	529.05	529.05	1.48	6.2	1509	>sp|P02817|AMELX_BOVIN Amelogenin, X isoform OS=Bos taurus OX=9913 GN=AMELX PE=1 SV=2	1	hf1_10472_ebo_36_1_261219.ScanId;v=1;d1=14000.14000.2	controllerType=0 controllerNumber=1 scan=14000	33.8843
18223:2	1	S.M[+15.995]PLPPHPGHPGYIN[+0.984]F.S		M[+16], N[+1]	845.911	2	1690.81	1690.8	0	5.6	17	Non	543.91	498.34	67.39	6.33	1509	>sp|P02817|AMELX_BOVIN Amelogenin, X isoform OS=Bos taurus OX=9913 GN=AMELX PE=1 SV=2	1	hf1_10472_ebo_36_1_261219.ScanId;v=1;d1=14921.14921.2	controllerType=0 controllerNumber=1 scan=14921	35.5471
19302:2	1	S.M[+15.995]PLPPHPGHPGYIN[+0.984]F.S		M[+16], N[+1]	845.909	2	1690.81	1690.8	0	4.3	17	Non	549.43	497.34	53.84	5.81	1509	>sp|P02817|AMELX_BOVIN Amelogenin, X isoform OS=Bos taurus OX=9913 GN=AMELX PE=1 SV=2	1	hf1_10472_ebo_36_1_261219.ScanId;v=1;d1=15671.15671.2	controllerType=0 controllerNumber=1 scan=15671	36.9118
18743:2	1	S.M[+15.995]PLPPHPGHPGYIN[+0.984]F.S		M[+16], N[+1]	845.91	2	1690.81	1690.8	0	4.8	17	Non	552.31	522.52	54.87	6.33	1509	>sp|P02817|AMELX_BOVIN Amelogenin, X isoform OS=Bos taurus OX=9913 GN=AMELX PE=1 SV=2	1	hf1_10472_ebo_36_1_261219.ScanId;v=1;d1=15290.15290.2	controllerType=0 controllerNumber=1 scan=15290	36.2225
16423:2	1	S.M[+15.995]PLPPHPGHPGY[+15.995]INF.S		M[+16], Y[+16]	853.416	2	1705.82	1705.82	0	4.9	17	Non	553.41	553.41	0	6.27	1509	>sp|P02817|AMELX_BOVIN Amelogenin, X isoform OS=Bos taurus OX=9913 GN=AMELX PE=1 SV=2	1	hf1_10472_ebo_36_1_261219.ScanId;v=1;d1=13624.13624.2	controllerType=0 controllerNumber=1 scan=13624	33.1924
18497:2	1	S.M[+15.995]PLPPHPGHPGYIN[+0.984]F.S		M[+16], N[+1]	845.911	2	1690.81	1690.8	0	5.8	17	Non	560.41	530.01	80.33	7.21	1509	>sp|P02817|AMELX_BOVIN Amelogenin, X isoform OS=Bos taurus OX=9913 GN=AMELX PE=1 SV=2	1	hf1_10472_ebo_36_1_261219.ScanId;v=1;d1=15112.15112.2	controllerType=0 controllerNumber=1 scan=15112	35.8872
19019:2	1	S.M[+15.995]PLPPHPGHPGYIN[+0.984]F.S		M[+16], N[+1]	845.91	2	1690.81	1690.8	0	4.3	17	Non	561.64	546.25	68.02	7.13	1509	>sp|P02817|AMELX_BOVIN Amelogenin, X isoform OS=Bos taurus OX=9913 GN=AMELX PE=1 SV=2	1	hf1_10472_ebo_36_1_261219.ScanId;v=1;d1=15484.15484.2	controllerType=0 controllerNumber=1 scan=15484	36.5696
15786:2	1	S.M[+15.995]PLPPHPGHPGYINFS.Y		M[+16]	888.935	2	1776.86	1776.85	0	5.4	17	Non	222.04	205.37	13.06	2.9	1509	>sp|P02817|AMELX_BOVIN Amelogenin, X isoform OS=Bos taurus OX=9913 GN=AMELX PE=1 SV=2	1	hf1_10472_ebo_36_1_261219.ScanId;v=1;d1=13163.13163.3	controllerType=0 controllerNumber=1 scan=13163	32.346
17125:3	1	S.MP[+15.995]LPPHPGHPGYINFS.Y		P[+16]	592.959	3	1776.86	1776.85	0	5.6	17	Non	266.54	201.13	4	4.1	1509	>sp|P02817|AMELX_BOVIN Amelogenin, X isoform OS=Bos taurus OX=9913 GN=AMELX PE=1 SV=2	1	hf1_10472_ebo_36_1_261219.ScanId;v=1;d1=14127.14127.3	controllerType=0 controllerNumber=1 scan=14127	34.1161
22611:3	1	S.MPLPPHPGHPGYINFS[+79.966].Y		S[+80]	614.286	3	1840.84	1840.82	0	9.9	17	Non	272.1	272.1	159.01	3.65	1509	>sp|P02817|AMELX_BOVIN Amelogenin, X isoform OS=Bos taurus OX=9913 GN=AMELX PE=1 SV=2	1	hf1_10472_ebo_36_1_261219.ScanId;v=1;d1=17846.17846.3	controllerType=0 controllerNumber=1 scan=17846	40.7972
16846:3	1	S.MP[+15.995]LPPHPGHPGYINFS.Y		P[+16]	592.957	3	1776.86	1776.85	0	2.5	17	Non	275.99	221.7	4	3.59	1509	>sp|P02817|AMELX_BOVIN Amelogenin, X isoform OS=Bos taurus OX=9913 GN=AMELX PE=1 SV=2	1	hf1_10472_ebo_36_1_261219.ScanId;v=1;d1=13938.13938.3	controllerType=0 controllerNumber=1 scan=13938	33.7734
15793:3	1	S.MP[+15.995]LPPHPGHPGYINFS.Y		P[+16]	592.957	3	1776.86	1776.85	0	2.4	17	Non	293.45	232.5	4	3.69	1509	>sp|P02817|AMELX_BOVIN Amelogenin, X isoform OS=Bos taurus OX=9913 GN=AMELX PE=1 SV=2	1	hf1_10472_ebo_36_1_261219.ScanId;v=1;d1=13170.13170.3	controllerType=0 controllerNumber=1 scan=13170	32.3614
16592:3	1	S.MP[+15.995]LPPHPGHPGYINFS.Y		P[+16]	592.958	3	1776.86	1776.85	0	3.1	17	Non	298.45	221.93	4	3.69	1509	>sp|P02817|AMELX_BOVIN Amelogenin, X isoform OS=Bos taurus OX=9913 GN=AMELX PE=1 SV=2	1	hf1_10472_ebo_36_1_261219.ScanId;v=1;d1=13750.13750.3	controllerType=0 controllerNumber=1 scan=13750	33.4265
16339:3	1	S.MP[+15.995]LPPHPGHPGYINFS.Y		P[+16]	592.958	3	1776.86	1776.85	0	3.7	17	Non	340	279.7	4	3.95	1509	>sp|P02817|AMELX_BOVIN Amelogenin, X isoform OS=Bos taurus OX=9913 GN=AMELX PE=1 SV=2	1	hf1_10472_ebo_36_1_261219.ScanId;v=1;d1=13561.13561.3	controllerType=0 controllerNumber=1 scan=13561	33.0758
20894:3	1	S.MPLPPHPGHPGYINFS[+79.966].Y		S[+80]	614.284	3	1840.84	1840.82	0	7.9	17	Non	353.29	283.15	237.38	4.69	1509	>sp|P02817|AMELX_BOVIN Amelogenin, X isoform OS=Bos taurus OX=9913 GN=AMELX PE=1 SV=2	1	hf1_10472_ebo_36_1_261219.ScanId;v=1;d1=16735.16735.3	controllerType=0 controllerNumber=1 scan=16735	38.8247
16060:3	1	S.MP[+15.995]LPPHPGHPGYINFS.Y		P[+16]	592.957	3	1776.86	1776.85	0	2.2	17	Non	365.11	277.72	4	3.79	1509	>sp|P02817|AMELX_BOVIN Amelogenin, X isoform OS=Bos taurus OX=9913 GN=AMELX PE=1 SV=2	1	hf1_10472_ebo_36_1_261219.ScanId;v=1;d1=13367.13367.3	controllerType=0 controllerNumber=1 scan=13367	32.7254
16122:2	1	S.M[+15.995]PLPPHPGHPGYINFS.Y		M[+16]	888.933	2	1776.86	1776.85	0	3.6	17	Non	376.46	311.63	28.06	4.31	1509	>sp|P02817|AMELX_BOVIN Amelogenin, X isoform OS=Bos taurus OX=9913 GN=AMELX PE=1 SV=2	1	hf1_10472_ebo_36_1_261219.ScanId;v=1;d1=13416.13416.2	controllerType=0 controllerNumber=1 scan=13416	32.8151
21983:3	1	S.MPLPPHPGHPGYINFS[+79.966].Y		S[+80]	614.284	3	1840.84	1840.82	0	6.8	17	Non	460.47	358.08	295.02	4.98	1509	>sp|P02817|AMELX_BOVIN Amelogenin, X isoform OS=Bos taurus OX=9913 GN=AMELX PE=1 SV=2	1	hf1_10472_ebo_36_1_261219.ScanId;v=1;d1=17447.17447.3	controllerType=0 controllerNumber=1 scan=17447	40.0961
21484:3	1	S.MPLPPHPGHPGYINFS[+79.966].Y		S[+80]	614.283	3	1840.84	1840.82	0	6.1	17	Non	466.6	397.56	273.6	5.92	1509	>sp|P02817|AMELX_BOVIN Amelogenin, X isoform OS=Bos taurus OX=9913 GN=AMELX PE=1 SV=2	1	hf1_10472_ebo_36_1_261219.ScanId;v=1;d1=17126.17126.3	controllerType=0 controllerNumber=1 scan=17126	39.5315
22083:2	1	S.MPLPPHPGHPGYINFS[+79.966].Y		S[+80]	920.922	2	1840.84	1840.82	0	6.6	17	Non	477.14	477.14	212.76	5.8	1509	>sp|P02817|AMELX_BOVIN Amelogenin, X isoform OS=Bos taurus OX=9913 GN=AMELX PE=1 SV=2	1	hf1_10472_ebo_36_1_261219.ScanId;v=1;d1=17509.17509.2	controllerType=0 controllerNumber=1 scan=17509	40.2055
20878:2	1	S.MPLPPHPGHPGYINFS[+79.966].Y		S[+80]	920.92	2	1840.83	1840.82	0	5.2	17	Non	479.22	479.22	289.93	6.16	1509	>sp|P02817|AMELX_BOVIN Amelogenin, X isoform OS=Bos taurus OX=9913 GN=AMELX PE=1 SV=2	1	hf1_10472_ebo_36_1_261219.ScanId;v=1;d1=16725.16725.2	controllerType=0 controllerNumber=1 scan=16725	38.8074
21752:2	1	S.MPLPPHPGHPGYINFS[+79.966].Y		S[+80]	920.922	2	1840.84	1840.82	0	6.6	17	Non	505.84	505.84	271.51	6.12	1509	>sp|P02817|AMELX_BOVIN Amelogenin, X isoform OS=Bos taurus OX=9913 GN=AMELX PE=1 SV=2	1	hf1_10472_ebo_36_1_261219.ScanId;v=1;d1=17306.17306.2	controllerType=0 controllerNumber=1 scan=17306	39.8491
21182:3	1	S.MPLPPHPGHPGYINFS[+79.966].Y		S[+80]	614.283	3	1840.83	1840.82	0	5.7	17	Non	507.01	401.95	313.64	6.53	1509	>sp|P02817|AMELX_BOVIN Amelogenin, X isoform OS=Bos taurus OX=9913 GN=AMELX PE=1 SV=2	1	hf1_10472_ebo_36_1_261219.ScanId;v=1;d1=16930.16930.3	controllerType=0 controllerNumber=1 scan=16930	39.1757
21453:2	1	S.MPLPPHPGHPGYINFS[+79.966].Y		S[+80]	920.921	2	1840.83	1840.82	0	5.9	17	Non	595.39	595.39	270.6	7.13	1509	>sp|P02817|AMELX_BOVIN Amelogenin, X isoform OS=Bos taurus OX=9913 GN=AMELX PE=1 SV=2	1	hf1_10472_ebo_36_1_261219.ScanId;v=1;d1=17105.17105.2	controllerType=0 controllerNumber=1 scan=17105	39.4945
21166:2	1	S.MPLPPHPGHPGYINFS[+79.966].Y		S[+80]	920.921	2	1840.84	1840.82	0	6.1	17	Non	609.06	609.06	298.2	8.13	1509	>sp|P02817|AMELX_BOVIN Amelogenin, X isoform OS=Bos taurus OX=9913 GN=AMELX PE=1 SV=2	1	hf1_10472_ebo_36_1_261219.ScanId;v=1;d1=16919.16919.2	controllerType=0 controllerNumber=1 scan=16919	39.1564
23029:2	1	S.MPLPPHPGHPGYIN[+0.984]FS[+79.966].Y		N[+1], S[+80]	921.413	2	1841.82	1841.81	0	6.1	17	Non	115.12	115.12	98.27	2.25	1509	>sp|P02817|AMELX_BOVIN Amelogenin, X isoform OS=Bos taurus OX=9913 GN=AMELX PE=1 SV=2	1	hf1_10472_ebo_36_1_261219.ScanId;v=1;d1=18123.18123.2	controllerType=0 controllerNumber=1 scan=18123	41.2892
22918:3	1	S.MPLPPHPGHPGYIN[+0.984]FS[+79.966].Y		N[+1], S[+80]	614.61	3	1841.82	1841.81	0	3.9	17	Non	136.9	136.9	136.9	2.26	1509	>sp|P02817|AMELX_BOVIN Amelogenin, X isoform OS=Bos taurus OX=9913 GN=AMELX PE=1 SV=2	1	hf1_10472_ebo_36_1_261219.ScanId;v=1;d1=18049.18049.3	controllerType=0 controllerNumber=1 scan=18049	41.1573
19434:3	1	S.MP[+31.990]LPPHPGHPGYINFS[+79.966].Y		P[+32], S[+80]	624.946	3	1872.82	1872.81	0	5.8	17	Non	184.99	184.99	1.8	2.69	1509	>sp|P02817|AMELX_BOVIN Amelogenin, X isoform OS=Bos taurus OX=9913 GN=AMELX PE=1 SV=2	1	hf1_10472_ebo_36_1_261219.ScanId;v=1;d1=15760.15760.3	controllerType=0 controllerNumber=1 scan=15760	37.0705
19139:3	1	S.MP[+31.990]LPPHPGHPGYINFS[+79.966].Y		P[+32], S[+80]	624.939	3	1872.8	1872.81	0	-6.3	17	Non	196.04	196.04	1.8	2.23	1509	>sp|P02817|AMELX_BOVIN Amelogenin, X isoform OS=Bos taurus OX=9913 GN=AMELX PE=1 SV=2	1	hf1_10472_ebo_36_1_261219.ScanId;v=1;d1=15567.15567.3	controllerType=0 controllerNumber=1 scan=15567	36.7187
22914:3	1	S.MPLPPHPGHPGYIN[+0.984]FS[+79.966].Y		N[+1], S[+80]	614.61	3	1841.82	1841.81	0	3.9	17	Non	232.3	232.3	210.87	2.68	1509	>sp|P02817|AMELX_BOVIN Amelogenin, X isoform OS=Bos taurus OX=9913 GN=AMELX PE=1 SV=2	1	hf1_10472_ebo_36_1_261219.ScanId;v=1;d1=18046.18046.3	controllerType=0 controllerNumber=1 scan=18046	41.1536
20806:3	1	S.MP[+15.995]LPPHPGHPGYINFS[+79.966].Y		P[+16], S[+80]	619.608	3	1856.81	1856.82	0	-4.7	17	Non	245.59	245.59	4	3.02	1509	>sp|P02817|AMELX_BOVIN Amelogenin, X isoform OS=Bos taurus OX=9913 GN=AMELX PE=1 SV=2	1	hf1_10472_ebo_36_1_261219.ScanId;v=1;d1=16677.16677.3	controllerType=0 controllerNumber=1 scan=16677	38.7222
17030:2	1	S.M[+15.995]PLPPHPGHPGYIN[+0.984]FS.Y		M[+16], N[+1]	889.428	2	1777.85	1777.84	0	6.8	17	Non	250.01	236.31	30.64	3.81	1509	>sp|P02817|AMELX_BOVIN Amelogenin, X isoform OS=Bos taurus OX=9913 GN=AMELX PE=1 SV=2	1	hf1_10472_ebo_36_1_261219.ScanId;v=1;d1=14064.14064.2	controllerType=0 controllerNumber=1 scan=14064	34.0017
19343:3	1	S.M[+15.995]PLPPHPGHPGYINFS[+79.966].Y		M[+16], S[+80]	619.609	3	1856.81	1856.82	0	-3.7	17	Non	270.15	270.15	6.45	3.42	1509	>sp|P02817|AMELX_BOVIN Amelogenin, X isoform OS=Bos taurus OX=9913 GN=AMELX PE=1 SV=2	1	hf1_10472_ebo_36_1_261219.ScanId;v=1;d1=15697.15697.3	controllerType=0 controllerNumber=1 scan=15697	36.9583
19051:3	1	S.M[+15.995]PLPPHPGHPGYINFS[+79.966].Y		M[+16], S[+80]	619.609	3	1856.81	1856.82	0	-3	17	Non	280.06	280.06	2.04	3.51	1509	>sp|P02817|AMELX_BOVIN Amelogenin, X isoform OS=Bos taurus OX=9913 GN=AMELX PE=1 SV=2	1	hf1_10472_ebo_36_1_261219.ScanId;v=1;d1=15508.15508.3	controllerType=0 controllerNumber=1 scan=15508	36.6125
16496:2	1	S.M[+15.995]PLPPHPGHPGYIN[+0.984]FS.Y		M[+16], N[+1]	889.429	2	1777.85	1777.84	0	7.9	17	Non	289.55	286.93	11.15	4.24	1509	>sp|P02817|AMELX_BOVIN Amelogenin, X isoform OS=Bos taurus OX=9913 GN=AMELX PE=1 SV=2	1	hf1_10472_ebo_36_1_261219.ScanId;v=1;d1=13675.13675.4	controllerType=0 controllerNumber=1 scan=13675	33.2846
18863:3	1	S.M[+31.990]PLPPHPGHPGYINFS[+79.966].Y		M[+32], S[+80]	624.947	3	1872.83	1872.81	0	6.3	17	Non	291.97	291.97	15.84	4.45	1509	>sp|P02817|AMELX_BOVIN Amelogenin, X isoform OS=Bos taurus OX=9913 GN=AMELX PE=1 SV=2	1	hf1_10472_ebo_36_1_261219.ScanId;v=1;d1=15375.15375.3	controllerType=0 controllerNumber=1 scan=15375	36.3733
16847:3	1	S.MP[+15.995]LPPHPGHPGYIN[+0.984]FS.Y		N[+1], P[+16]	593.285	3	1777.84	1777.84	0	2.4	17	Non	312.83	199.56	4	3.64	1509	>sp|P02817|AMELX_BOVIN Amelogenin, X isoform OS=Bos taurus OX=9913 GN=AMELX PE=1 SV=2	1	hf1_10472_ebo_36_1_261219.ScanId;v=1;d1=13938.13938.3	controllerType=0 controllerNumber=1 scan=13938	33.7734
17177:3	1	S.M[+15.995]PLPPHPGHPGYINFS[+79.966].Y		M[+16], S[+80]	619.615	3	1856.83	1856.82	0	6.7	17	Non	325.17	325.17	5.34	4.61	1509	>sp|P02817|AMELX_BOVIN Amelogenin, X isoform OS=Bos taurus OX=9913 GN=AMELX PE=1 SV=2	1	hf1_10472_ebo_36_1_261219.ScanId;v=1;d1=14166.14166.3	controllerType=0 controllerNumber=1 scan=14166	34.1875
17972:3	1	S.M[+15.995]PLPPHPGHPGYINFS[+79.966].Y		M[+16], S[+80]	619.614	3	1856.83	1856.82	0	4	17	Non	327.29	327.29	7.37	4.45	1509	>sp|P02817|AMELX_BOVIN Amelogenin, X isoform OS=Bos taurus OX=9913 GN=AMELX PE=1 SV=2	1	hf1_10472_ebo_36_1_261219.ScanId;v=1;d1=14741.14741.3	controllerType=0 controllerNumber=1 scan=14741	35.2219
18770:3	1	S.M[+15.995]PLPPHPGHPGYINFS[+79.966].Y		M[+16], S[+80]	619.611	3	1856.82	1856.82	0	-1	17	Non	332.79	332.79	7.66	4.12	1509	>sp|P02817|AMELX_BOVIN Amelogenin, X isoform OS=Bos taurus OX=9913 GN=AMELX PE=1 SV=2	1	hf1_10472_ebo_36_1_261219.ScanId;v=1;d1=15310.15310.3	controllerType=0 controllerNumber=1 scan=15310	36.2607
18516:3	1	S.MP[+15.995]LPPHPGHPGYINFS[+79.966].Y		P[+16], S[+80]	619.612	3	1856.82	1856.82	0	1.7	17	Non	371.98	371.98	4	5.15	1509	>sp|P02817|AMELX_BOVIN Amelogenin, X isoform OS=Bos taurus OX=9913 GN=AMELX PE=1 SV=2	1	hf1_10472_ebo_36_1_261219.ScanId;v=1;d1=15127.15127.3	controllerType=0 controllerNumber=1 scan=15127	35.9138
45265:3	1	S.M[+15.995]PLPPHPGHPGYINFS[+79.966].Y		M[+16], S[+80]	619.616	3	1856.83	1856.82	0	7.3	17	Non	378.3	337.43	12.41	4.94	1509	>sp|P02817|AMELX_BOVIN Amelogenin, X isoform OS=Bos taurus OX=9913 GN=AMELX PE=1 SV=2	1	hf1_10472_ebo_36_1_261219.ScanId;v=1;d1=33675.33675.3	controllerType=0 controllerNumber=1 scan=33675	73.5339
17206:2	1	S.M[+15.995]PLPPHPGHPGYINFS[+79.966].Y		M[+16], S[+80]	928.912	2	1856.82	1856.82	0	-1.3	17	Non	382.57	382.57	17.48	5.33	1509	>sp|P02817|AMELX_BOVIN Amelogenin, X isoform OS=Bos taurus OX=9913 GN=AMELX PE=1 SV=2	1	hf1_10472_ebo_36_1_261219.ScanId;v=1;d1=14185.14185.2	controllerType=0 controllerNumber=1 scan=14185	34.2211
18548:2	1	S.M[+15.995]PLPPHPGHPGYINFS[+79.966].Y		M[+16], S[+80]	928.913	2	1856.82	1856.82	0	-0.6	17	Non	407.26	407.26	13.48	5.34	1509	>sp|P02817|AMELX_BOVIN Amelogenin, X isoform OS=Bos taurus OX=9913 GN=AMELX PE=1 SV=2	1	hf1_10472_ebo_36_1_261219.ScanId;v=1;d1=15153.15153.2	controllerType=0 controllerNumber=1 scan=15153	35.9598
18239:3	1	S.M[+15.995]PLPPHPGHPGYINFS[+79.966].Y		M[+16], S[+80]	619.614	3	1856.83	1856.82	0	4.7	17	Non	414.51	414.51	6.55	5.98	1509	>sp|P02817|AMELX_BOVIN Amelogenin, X isoform OS=Bos taurus OX=9913 GN=AMELX PE=1 SV=2	1	hf1_10472_ebo_36_1_261219.ScanId;v=1;d1=14934.14934.3	controllerType=0 controllerNumber=1 scan=14934	35.5712
17727:3	1	S.M[+15.995]PLPPHPGHPGYINFS[+79.966].Y		M[+16], S[+80]	619.614	3	1856.83	1856.82	0	4.4	17	Non	417.75	366.36	5.9	5.98	1509	>sp|P02817|AMELX_BOVIN Amelogenin, X isoform OS=Bos taurus OX=9913 GN=AMELX PE=1 SV=2	1	hf1_10472_ebo_36_1_261219.ScanId;v=1;d1=14560.14560.3	controllerType=0 controllerNumber=1 scan=14560	34.8845
17451:3	1	S.M[+15.995]PLPPHPGHPGYINFS[+79.966].Y		M[+16], S[+80]	619.614	3	1856.83	1856.82	0	4.8	17	Non	425.11	425.11	20.14	5.9	1509	>sp|P02817|AMELX_BOVIN Amelogenin, X isoform OS=Bos taurus OX=9913 GN=AMELX PE=1 SV=2	1	hf1_10472_ebo_36_1_261219.ScanId;v=1;d1=14364.14364.3	controllerType=0 controllerNumber=1 scan=14364	34.5374
22701:2	1	S.MPLPPHPGHPGYIN[+0.984]FS[+79.966].Y		N[+1], S[+80]	921.413	2	1841.82	1841.81	0	5.5	17	Non	467.69	361.32	248.79	6.24	1509	>sp|P02817|AMELX_BOVIN Amelogenin, X isoform OS=Bos taurus OX=9913 GN=AMELX PE=1 SV=2	1	hf1_10472_ebo_36_1_261219.ScanId;v=1;d1=17905.17905.2	controllerType=0 controllerNumber=1 scan=17905	40.9017
22612:3	1	S.MPLPPHPGHPGYIN[+0.984]FS[+79.966].Y		N[+1], S[+80]	614.61	3	1841.82	1841.81	0	4.5	17	Non	493.81	280.19	280.19	4.95	1509	>sp|P02817|AMELX_BOVIN Amelogenin, X isoform OS=Bos taurus OX=9913 GN=AMELX PE=1 SV=2	1	hf1_10472_ebo_36_1_261219.ScanId;v=1;d1=17846.17846.3	controllerType=0 controllerNumber=1 scan=17846	40.7972
22084:2	1	S.MPLPPHPGHPGYIN[+0.984]FS[+79.966].Y		N[+1], S[+80]	921.416	2	1841.83	1841.81	0	9.2	17	Non	504.55	504.55	285.58	5.47	1509	>sp|P02817|AMELX_BOVIN Amelogenin, X isoform OS=Bos taurus OX=9913 GN=AMELX PE=1 SV=2	1	hf1_10472_ebo_36_1_261219.ScanId;v=1;d1=17509.17509.2	controllerType=0 controllerNumber=1 scan=17509	40.2055
18808:2	1	S.M[+15.995]PLPPHPGHPGYINFS[+79.966].Y		M[+16], S[+80]	928.91	2	1856.81	1856.82	0	-3.4	17	Non	512.15	512.15	34.4	5.09	1509	>sp|P02817|AMELX_BOVIN Amelogenin, X isoform OS=Bos taurus OX=9913 GN=AMELX PE=1 SV=2	1	hf1_10472_ebo_36_1_261219.ScanId;v=1;d1=15339.15339.2	controllerType=0 controllerNumber=1 scan=15339	36.3094
22296:3	1	S.MPLPPHPGHPGYIN[+0.984]FS[+79.966].Y		N[+1], S[+80]	614.611	3	1841.82	1841.81	0	5.2	17	Non	522.12	370.01	370.01	6.17	1509	>sp|P02817|AMELX_BOVIN Amelogenin, X isoform OS=Bos taurus OX=9913 GN=AMELX PE=1 SV=2	1	hf1_10472_ebo_36_1_261219.ScanId;v=1;d1=17644.17644.3	controllerType=0 controllerNumber=1 scan=17644	40.4428
22399:2	1	S.MPLPPHPGHPGYIN[+0.984]FS[+79.966].Y		N[+1], S[+80]	921.413	2	1841.82	1841.81	0	5.7	17	Non	581.28	428.11	347.43	7.21	1509	>sp|P02817|AMELX_BOVIN Amelogenin, X isoform OS=Bos taurus OX=9913 GN=AMELX PE=1 SV=2	1	hf1_10472_ebo_36_1_261219.ScanId;v=1;d1=17710.17710.2	controllerType=0 controllerNumber=1 scan=17710	40.5584
17481:2	1	S.M[+15.995]PLPPHPGHPGYINFS[+79.966].Y		M[+16], S[+80]	928.918	2	1856.83	1856.82	0	5.1	17	Non	601.5	601.5	34.12	8.7	1509	>sp|P02817|AMELX_BOVIN Amelogenin, X isoform OS=Bos taurus OX=9913 GN=AMELX PE=1 SV=2	1	hf1_10472_ebo_36_1_261219.ScanId;v=1;d1=14386.14386.2	controllerType=0 controllerNumber=1 scan=14386	34.572
17746:2	1	S.M[+15.995]PLPPHPGHPGYINFS[+79.966].Y		M[+16], S[+80]	928.918	2	1856.83	1856.82	0	5.5	17	Non	603.37	603.37	35.26	8.7	1509	>sp|P02817|AMELX_BOVIN Amelogenin, X isoform OS=Bos taurus OX=9913 GN=AMELX PE=1 SV=2	1	hf1_10472_ebo_36_1_261219.ScanId;v=1;d1=14575.14575.2	controllerType=0 controllerNumber=1 scan=14575	34.9086
18006:2	1	S.M[+15.995]PLPPHPGHPGYINFS[+79.966].Y		M[+16], S[+80]	928.918	2	1856.83	1856.82	0	4.9	17	Non	640.5	640.5	34.37	8.7	1509	>sp|P02817|AMELX_BOVIN Amelogenin, X isoform OS=Bos taurus OX=9913 GN=AMELX PE=1 SV=2	1	hf1_10472_ebo_36_1_261219.ScanId;v=1;d1=14766.14766.2	controllerType=0 controllerNumber=1 scan=14766	35.2628
18276:2	1	S.M[+15.995]PLPPHPGHPGYINFS[+79.966].Y		M[+16], S[+80]	928.918	2	1856.83	1856.82	0	5.4	17	Non	678.75	678.75	39.39	9.7	1509	>sp|P02817|AMELX_BOVIN Amelogenin, X isoform OS=Bos taurus OX=9913 GN=AMELX PE=1 SV=2	1	hf1_10472_ebo_36_1_261219.ScanId;v=1;d1=14963.14963.2	controllerType=0 controllerNumber=1 scan=14963	35.6191
19518:3	1	S.MP[+15.995]LPPHPGHPGYIN[+0.984]FS[+79.966].Y		N[+1], P[+16], S[+80]	619.942	3	1857.81	1857.8	0	5.3	17	Non	84.52	84.52	4	1.03	1509	>sp|P02817|AMELX_BOVIN Amelogenin, X isoform OS=Bos taurus OX=9913 GN=AMELX PE=1 SV=2	1	hf1_10472_ebo_36_1_261219.ScanId;v=1;d1=15812.15812.2	controllerType=0 controllerNumber=1 scan=15812	37.1669
17646:2	1	S.MP[+15.995]LPPHPGHP[+15.995]GYINFS[+79.966].Y		P[+16]*2, S[+80]	936.908	2	1872.81	1872.81	0	-2.3	17	Non	126.06	100.37	0	1.1	1509	>sp|P02817|AMELX_BOVIN Amelogenin, X isoform OS=Bos taurus OX=9913 GN=AMELX PE=1 SV=2	1	hf1_10472_ebo_36_1_261219.ScanId;v=1;d1=14506.14506.2	controllerType=0 controllerNumber=1 scan=14506	34.7919
20877:2	1	S.MP[+15.995]LP[+15.995]PHPGHPGYINFS[+79.966].Y		P[+16]*2, S[+80]	936.905	2	1872.8	1872.81	0	-6.2	17	Non	160.58	160.58	6.17	2.2	1509	>sp|P02817|AMELX_BOVIN Amelogenin, X isoform OS=Bos taurus OX=9913 GN=AMELX PE=1 SV=2	1	hf1_10472_ebo_36_1_261219.ScanId;v=1;d1=16724.16724.2	controllerType=0 controllerNumber=1 scan=16724	38.8058
18595:3	1	S.M[+15.995]PLPPHP[+15.995]GHPGYINFS[+79.966].Y		M[+16], P[+16], S[+80]	624.941	3	1872.81	1872.81	0	-2.2	17	Non	162.6	162.6	4.31	2.25	1509	>sp|P02817|AMELX_BOVIN Amelogenin, X isoform OS=Bos taurus OX=9913 GN=AMELX PE=1 SV=2	1	hf1_10472_ebo_36_1_261219.ScanId;v=1;d1=15185.15185.3	controllerType=0 controllerNumber=1 scan=15185	36.0204
20276:3	1	S.MP[+31.990]LPPHPGHPGYIN[+0.984]FS[+79.966].Y		N[+1], P[+32], S[+80]	625.274	3	1873.81	1873.8	0	5.8	17	Non	166.01	114.93	1.8	2.23	1509	>sp|P02817|AMELX_BOVIN Amelogenin, X isoform OS=Bos taurus OX=9913 GN=AMELX PE=1 SV=2	1	hf1_10472_ebo_36_1_261219.ScanId;v=1;d1=16310.16310.3	controllerType=0 controllerNumber=1 scan=16310	38.0585
21532:3	1	S.MP[+15.995]LPPHPGHPGYIN[+0.984]FS[+79.966].Y		N[+1], P[+16], S[+80]	619.943	3	1857.81	1857.8	0	5.9	17	Non	194.4	194.4	16.8	2.69	1509	>sp|P02817|AMELX_BOVIN Amelogenin, X isoform OS=Bos taurus OX=9913 GN=AMELX PE=1 SV=2	1	hf1_10472_ebo_36_1_261219.ScanId;v=1;d1=17156.17156.3	controllerType=0 controllerNumber=1 scan=17156	39.5817
17794:3	1	S.M[+15.995]PLPPHPGHPGY[+15.995]INFS[+79.966].Y		M[+16], S[+80], Y[+16]	624.94	3	1872.8	1872.81	0	-4.9	17	Non	220.6	220.6	2.18	2.3	1509	>sp|P02817|AMELX_BOVIN Amelogenin, X isoform OS=Bos taurus OX=9913 GN=AMELX PE=1 SV=2	1	hf1_10472_ebo_36_1_261219.ScanId;v=1;d1=14611.14611.3	controllerType=0 controllerNumber=1 scan=14611	34.9777
18320:3	1	S.M[+15.995]PLPPHPGHP[+15.995]GYINFS[+79.966].Y		M[+16], P[+16], S[+80]	624.944	3	1872.82	1872.81	0	1.6	17	Non	252.23	252.23	3.95	3.64	1509	>sp|P02817|AMELX_BOVIN Amelogenin, X isoform OS=Bos taurus OX=9913 GN=AMELX PE=1 SV=2	1	hf1_10472_ebo_36_1_261219.ScanId;v=1;d1=14993.14993.3	controllerType=0 controllerNumber=1 scan=14993	35.6744
16719:3	1	S.M[+15.995]PLPPHPGHPGY[+15.995]INFS[+79.966].Y		M[+16], S[+80], Y[+16]	624.946	3	1872.82	1872.81	0	4.3	17	Non	286.42	286.42	0	4.53	1509	>sp|P02817|AMELX_BOVIN Amelogenin, X isoform OS=Bos taurus OX=9913 GN=AMELX PE=1 SV=2	1	hf1_10472_ebo_36_1_261219.ScanId;v=1;d1=13846.13846.3	controllerType=0 controllerNumber=1 scan=13846	33.6011
16448:2	1	S.M[+15.995]PLPPHPGHPGY[+15.995]INFS[+79.966].Y		M[+16], S[+80], Y[+16]	936.913	2	1872.82	1872.81	0	3	17	Non	320.27	300.28	0	4.26	1509	>sp|P02817|AMELX_BOVIN Amelogenin, X isoform OS=Bos taurus OX=9913 GN=AMELX PE=1 SV=2	1	hf1_10472_ebo_36_1_261219.ScanId;v=1;d1=13643.13643.2	controllerType=0 controllerNumber=1 scan=13643	33.2292
17836:2	1	S.M[+15.995]PLPPHPGHPGY[+15.995]INFS[+79.966].Y		M[+16], S[+80], Y[+16]	936.913	2	1872.82	1872.81	0	2.1	17	Non	327.83	327.83	0	4.2	1509	>sp|P02817|AMELX_BOVIN Amelogenin, X isoform OS=Bos taurus OX=9913 GN=AMELX PE=1 SV=2	1	hf1_10472_ebo_36_1_261219.ScanId;v=1;d1=14642.14642.4	controllerType=0 controllerNumber=1 scan=14642	35.0376
20818:2	1	S.M[+15.995]PLPPHPGHPGYIN[+0.984]FS[+79.966].Y		M[+16], N[+1], S[+80]	929.413	2	1857.82	1857.8	0	8.5	17	Non	353.58	344.21	6.44	4.43	1509	>sp|P02817|AMELX_BOVIN Amelogenin, X isoform OS=Bos taurus OX=9913 GN=AMELX PE=1 SV=2	1	hf1_10472_ebo_36_1_261219.ScanId;v=1;d1=16686.16686.2	controllerType=0 controllerNumber=1 scan=16686	38.7382
20517:2	1	S.M[+15.995]PLPPHPGHPGYIN[+0.984]FS[+79.966].Y		M[+16], N[+1], S[+80]	929.408	2	1857.81	1857.8	0	2.8	17	Non	436.66	371.57	36.08	5.56	1509	>sp|P02817|AMELX_BOVIN Amelogenin, X isoform OS=Bos taurus OX=9913 GN=AMELX PE=1 SV=2	1	hf1_10472_ebo_36_1_261219.ScanId;v=1;d1=16480.16480.2	controllerType=0 controllerNumber=1 scan=16480	38.3668
19681:3	1	S.M[+15.995]PLPPHPGHPGYIN[+0.984]FS[+79.966].Y		M[+16], N[+1], S[+80]	619.942	3	1857.81	1857.8	0	4	17	Non	476.02	399.21	21.38	5.97	1509	>sp|P02817|AMELX_BOVIN Amelogenin, X isoform OS=Bos taurus OX=9913 GN=AMELX PE=1 SV=2	1	hf1_10472_ebo_36_1_261219.ScanId;v=1;d1=15920.15920.3	controllerType=0 controllerNumber=1 scan=15920	37.3587
20279:3	1	S.M[+15.995]PLPPHPGHPGYIN[+0.984]FS[+79.966].Y		M[+16], N[+1], S[+80]	619.942	3	1857.81	1857.8	0	4.2	17	Non	516	439.83	5.14	5.52	1509	>sp|P02817|AMELX_BOVIN Amelogenin, X isoform OS=Bos taurus OX=9913 GN=AMELX PE=1 SV=2	1	hf1_10472_ebo_36_1_261219.ScanId;v=1;d1=16313.16313.3	controllerType=0 controllerNumber=1 scan=16313	38.0657
20240:2	1	S.M[+15.995]PLPPHPGHPGYIN[+0.984]FS[+79.966].Y		M[+16], N[+1], S[+80]	929.411	2	1857.81	1857.8	0	6	17	Non	520.67	447.73	30.81	6.27	1509	>sp|P02817|AMELX_BOVIN Amelogenin, X isoform OS=Bos taurus OX=9913 GN=AMELX PE=1 SV=2	1	hf1_10472_ebo_36_1_261219.ScanId;v=1;d1=16286.16286.2	controllerType=0 controllerNumber=1 scan=16286	38.019
19978:3	1	S.M[+15.995]PLPPHPGHPGYIN[+0.984]FS[+79.966].Y		M[+16], N[+1], S[+80]	619.943	3	1857.81	1857.8	0	6.4	17	Non	526.41	438.79	14.09	6.1	1509	>sp|P02817|AMELX_BOVIN Amelogenin, X isoform OS=Bos taurus OX=9913 GN=AMELX PE=1 SV=2	1	hf1_10472_ebo_36_1_261219.ScanId;v=1;d1=16117.16117.3	controllerType=0 controllerNumber=1 scan=16117	37.7113
19956:2	1	S.M[+15.995]PLPPHPGHPGYIN[+0.984]FS[+79.966].Y		M[+16], N[+1], S[+80]	929.411	2	1857.82	1857.8	0	6.4	17	Non	548.91	458.25	42.47	6.34	1509	>sp|P02817|AMELX_BOVIN Amelogenin, X isoform OS=Bos taurus OX=9913 GN=AMELX PE=1 SV=2	1	hf1_10472_ebo_36_1_261219.ScanId;v=1;d1=16100.16100.2	controllerType=0 controllerNumber=1 scan=16100	37.6809
19659:2	1	S.M[+15.995]PLPPHPGHPGYIN[+0.984]FS[+79.966].Y		M[+16], N[+1], S[+80]	929.409	2	1857.81	1857.8	0	4.7	17	Non	557.9	472.85	35.43	6.41	1509	>sp|P02817|AMELX_BOVIN Amelogenin, X isoform OS=Bos taurus OX=9913 GN=AMELX PE=1 SV=2	1	hf1_10472_ebo_36_1_261219.ScanId;v=1;d1=15906.15906.2	controllerType=0 controllerNumber=1 scan=15906	37.3359
19086:2	1	S.M[+15.995]PLPPHPGHPGYIN[+0.984]FS[+79.966].Y		M[+16], N[+1], S[+80]	929.411	2	1857.81	1857.8	0	5.9	17	Non	574.27	483.46	44.37	7.21	1509	>sp|P02817|AMELX_BOVIN Amelogenin, X isoform OS=Bos taurus OX=9913 GN=AMELX PE=1 SV=2	1	hf1_10472_ebo_36_1_261219.ScanId;v=1;d1=15531.15531.2	controllerType=0 controllerNumber=1 scan=15531	36.6539
18809:2	1	S.M[+15.995]PLPPHPGHPGYIN[+0.984]FS[+79.966].Y		M[+16], N[+1], S[+80]	929.411	2	1857.81	1857.8	0	6.3	17	Non	601.93	532.49	54.33	8.63	1509	>sp|P02817|AMELX_BOVIN Amelogenin, X isoform OS=Bos taurus OX=9913 GN=AMELX PE=1 SV=2	1	hf1_10472_ebo_36_1_261219.ScanId;v=1;d1=15339.15339.2	controllerType=0 controllerNumber=1 scan=15339	36.3094
19375:2	1	S.M[+15.995]PLPPHPGHPGYIN[+0.984]FS[+79.966].Y		M[+16], N[+1], S[+80]	929.411	2	1857.81	1857.8	0	6	17	Non	604.36	499.19	35.6	8.7	1509	>sp|P02817|AMELX_BOVIN Amelogenin, X isoform OS=Bos taurus OX=9913 GN=AMELX PE=1 SV=2	1	hf1_10472_ebo_36_1_261219.ScanId;v=1;d1=15719.15719.2	controllerType=0 controllerNumber=1 scan=15719	36.9955
20813:3	1	S.MP[+15.995]LPPHPGHPGYINFS[+79.966]Y.E		P[+16], S[+80]	673.97	3	2019.89	2019.88	0	6	17	Non	252.48	107.98	5.8	2.74	1509	>sp|P02817|AMELX_BOVIN Amelogenin, X isoform OS=Bos taurus OX=9913 GN=AMELX PE=1 SV=2	1	hf1_10472_ebo_36_1_261219.ScanId;v=1;d1=16682.16682.3	controllerType=0 controllerNumber=1 scan=16682	38.7294
22335:3	1	S.M[+15.995]PLPPHPGHPGYINFS[+79.966]Y.E		M[+16], S[+80]	673.962	3	2019.87	2019.88	0	-5.6	17	Non	303.04	303.04	14.34	3.17	1509	>sp|P02817|AMELX_BOVIN Amelogenin, X isoform OS=Bos taurus OX=9913 GN=AMELX PE=1 SV=2	1	hf1_10472_ebo_36_1_261219.ScanId;v=1;d1=17667.17667.3	controllerType=0 controllerNumber=1 scan=17667	40.4828
22007:3	1	S.M[+15.995]PLPPHPGHPGYINFS[+79.966]Y.E		M[+16], S[+80]	673.966	3	2019.88	2019.88	0	0.2	17	Non	320.46	229.84	5.76	3.44	1509	>sp|P02817|AMELX_BOVIN Amelogenin, X isoform OS=Bos taurus OX=9913 GN=AMELX PE=1 SV=2	1	hf1_10472_ebo_36_1_261219.ScanId;v=1;d1=17463.17463.3	controllerType=0 controllerNumber=1 scan=17463	40.1256
21693:3	1	S.MP[+15.995]LPPHPGHPGYINFS[+79.966]Y.E		P[+16], S[+80]	673.97	3	2019.9	2019.88	0	6.9	17	Non	347.34	165.03	0.96	4.37	1509	>sp|P02817|AMELX_BOVIN Amelogenin, X isoform OS=Bos taurus OX=9913 GN=AMELX PE=1 SV=2	1	hf1_10472_ebo_36_1_261219.ScanId;v=1;d1=17263.17263.3	controllerType=0 controllerNumber=1 scan=17263	39.7708
21078:2	1	S.M[+15.995]PLPPHPGHPGYINFS[+79.966]Y.E		M[+16], S[+80]	1010.45	2	2019.9	2019.88	0	7	17	Non	374.3	374.3	9.94	5.99	1509	>sp|P02817|AMELX_BOVIN Amelogenin, X isoform OS=Bos taurus OX=9913 GN=AMELX PE=1 SV=2	1	hf1_10472_ebo_36_1_261219.ScanId;v=1;d1=16862.16862.2	controllerType=0 controllerNumber=1 scan=16862	39.0526
21396:3	1	S.M[+15.995]PLPPHPGHPGYINFS[+79.966]Y.E		M[+16], S[+80]	673.97	3	2019.89	2019.88	0	5.9	17	Non	384.14	159.02	13.71	3.47	1509	>sp|P02817|AMELX_BOVIN Amelogenin, X isoform OS=Bos taurus OX=9913 GN=AMELX PE=1 SV=2	1	hf1_10472_ebo_36_1_261219.ScanId;v=1;d1=17069.17069.3	controllerType=0 controllerNumber=1 scan=17069	39.4266
21094:3	1	S.M[+15.995]PLPPHPGHPGYINFS[+79.966]Y.E		M[+16], S[+80]	673.97	3	2019.89	2019.88	0	6.2	17	Non	414.43	196.65	10.47	4.51	1509	>sp|P02817|AMELX_BOVIN Amelogenin, X isoform OS=Bos taurus OX=9913 GN=AMELX PE=1 SV=2	1	hf1_10472_ebo_36_1_261219.ScanId;v=1;d1=16872.16872.3	controllerType=0 controllerNumber=1 scan=16872	39.0701
21385:2	1	S.M[+15.995]PLPPHPGHPGYINFS[+79.966]Y.E		M[+16], S[+80]	1010.45	2	2019.89	2019.88	0	2	17	Non	437.36	437.36	3.49	5.49	1509	>sp|P02817|AMELX_BOVIN Amelogenin, X isoform OS=Bos taurus OX=9913 GN=AMELX PE=1 SV=2	1	hf1_10472_ebo_36_1_261219.ScanId;v=1;d1=17061.17061.2	controllerType=0 controllerNumber=1 scan=17061	39.4118
22024:2	1	S.M[+15.995]PLPPHPGHPGYIN[+0.984]FS[+79.966]Y.E		M[+16], N[+1], S[+80]	1010.94	2	2020.87	2020.87	0	2.1	17	Non	179.95	149.82	2.87	2.27	1509	>sp|P02817|AMELX_BOVIN Amelogenin, X isoform OS=Bos taurus OX=9913 GN=AMELX PE=1 SV=2	1	hf1_10472_ebo_36_1_261219.ScanId;v=1;d1=17471.17471.2	controllerType=0 controllerNumber=1 scan=17471	40.1377
22425:3	1	S.M[+15.995]PLPPHPGHPGYIN[+0.984]FS[+79.966]Y.E		M[+16], N[+1], S[+80]	674.296	3	2020.87	2020.87	0	3.4	17	Non	180.1	125.86	5.82	2.22	1509	>sp|P02817|AMELX_BOVIN Amelogenin, X isoform OS=Bos taurus OX=9913 GN=AMELX PE=1 SV=2	1	hf1_10472_ebo_36_1_261219.ScanId;v=1;d1=17727.17727.4	controllerType=0 controllerNumber=1 scan=17727	40.5864
22391:2	1	S.M[+15.995]PLPPHPGHPGYIN[+0.984]FS[+79.966]Y.E		M[+16], N[+1], S[+80]	1010.94	2	2020.88	2020.87	0	6.7	17	Non	231.16	190.7	1.31	3.19	1509	>sp|P02817|AMELX_BOVIN Amelogenin, X isoform OS=Bos taurus OX=9913 GN=AMELX PE=1 SV=2	1	hf1_10472_ebo_36_1_261219.ScanId;v=1;d1=17704.17704.2	controllerType=0 controllerNumber=1 scan=17704	40.5466
22336:3	1	S.M[+15.995]PLPPHPGHPGYIN[+0.984]FS[+79.966]Y.E		M[+16], N[+1], S[+80]	674.296	3	2020.87	2020.87	0	4.1	17	Non	347.15	195.16	4.53	3.65	1509	>sp|P02817|AMELX_BOVIN Amelogenin, X isoform OS=Bos taurus OX=9913 GN=AMELX PE=1 SV=2	1	hf1_10472_ebo_36_1_261219.ScanId;v=1;d1=17667.17667.3	controllerType=0 controllerNumber=1 scan=17667	40.4828
22008:3	1	S.M[+15.995]PLPPHPGHPGYIN[+0.984]FS[+79.966]Y.E		M[+16], N[+1], S[+80]	674.299	3	2020.88	2020.87	0	8.4	17	Non	363.88	251.02	16.22	4.02	1509	>sp|P02817|AMELX_BOVIN Amelogenin, X isoform OS=Bos taurus OX=9913 GN=AMELX PE=1 SV=2	1	hf1_10472_ebo_36_1_261219.ScanId;v=1;d1=17463.17463.3	controllerType=0 controllerNumber=1 scan=17463	40.1256
19756:3	1	S.MP[+15.995]LPPHPGHPGYINFS[+79.966]YE.V		P[+16], S[+80]	716.985	3	2148.94	2148.92	0	7.4	17	Non	250.72	250.72	4	4.29	1509	>sp|P02817|AMELX_BOVIN Amelogenin, X isoform OS=Bos taurus OX=9913 GN=AMELX PE=1 SV=2	1	hf1_10472_ebo_36_1_261219.ScanId;v=1;d1=15968.15968.3	controllerType=0 controllerNumber=1 scan=15968	37.4429
21186:3	1	S.M[+15.995]PLPPHPGHPGYINFS[+79.966]YE.V		M[+16], S[+80]	716.979	3	2148.92	2148.92	0	-0.8	17	Non	302.32	302.32	10.81	3.75	1509	>sp|P02817|AMELX_BOVIN Amelogenin, X isoform OS=Bos taurus OX=9913 GN=AMELX PE=1 SV=2	1	hf1_10472_ebo_36_1_261219.ScanId;v=1;d1=16933.16933.3	controllerType=0 controllerNumber=1 scan=16933	39.1798
20888:3	1	S.M[+15.995]PLPPHPGHPGYINFS[+79.966]YE.V		M[+16], S[+80]	716.98	3	2148.93	2148.92	0	0.9	17	Non	352.33	352.33	18.54	4.18	1509	>sp|P02817|AMELX_BOVIN Amelogenin, X isoform OS=Bos taurus OX=9913 GN=AMELX PE=1 SV=2	1	hf1_10472_ebo_36_1_261219.ScanId;v=1;d1=16732.16732.3	controllerType=0 controllerNumber=1 scan=16732	38.8206
20233:2	1	S.M[+15.995]PLPPHPGHPGYINFS[+79.966]YE.V		M[+16], S[+80]	1074.98	2	2148.94	2148.92	0	8.7	17	Non	354.5	354.5	30	4.43	1509	>sp|P02817|AMELX_BOVIN Amelogenin, X isoform OS=Bos taurus OX=9913 GN=AMELX PE=1 SV=2	1	hf1_10472_ebo_36_1_261219.ScanId;v=1;d1=16282.16282.2	controllerType=0 controllerNumber=1 scan=16282	38.0102
19934:2	1	S.M[+15.995]PLPPHPGHPGYINFS[+79.966]YE.V		M[+16], S[+80]	1074.97	2	2148.94	2148.92	0	7	17	Non	371.36	371.36	23.98	6.05	1509	>sp|P02817|AMELX_BOVIN Amelogenin, X isoform OS=Bos taurus OX=9913 GN=AMELX PE=1 SV=2	1	hf1_10472_ebo_36_1_261219.ScanId;v=1;d1=16086.16086.2	controllerType=0 controllerNumber=1 scan=16086	37.6547
20601:3	1	S.M[+15.995]PLPPHPGHPGYINFS[+79.966]YE.V		M[+16], S[+80]	716.983	3	2148.94	2148.92	0	5	17	Non	380.41	380.41	23.25	5.88	1509	>sp|P02817|AMELX_BOVIN Amelogenin, X isoform OS=Bos taurus OX=9913 GN=AMELX PE=1 SV=2	1	hf1_10472_ebo_36_1_261219.ScanId;v=1;d1=16542.16542.3	controllerType=0 controllerNumber=1 scan=16542	38.4785
20330:3	1	S.M[+15.995]PLPPHPGHPGYINFS[+79.966]YE.V		M[+16], S[+80]	716.984	3	2148.94	2148.92	0	5.9	17	Non	407.71	407.71	13.38	5.84	1509	>sp|P02817|AMELX_BOVIN Amelogenin, X isoform OS=Bos taurus OX=9913 GN=AMELX PE=1 SV=2	1	hf1_10472_ebo_36_1_261219.ScanId;v=1;d1=16349.16349.3	controllerType=0 controllerNumber=1 scan=16349	38.1281
20048:3	1	S.M[+15.995]PLPPHPGHPGYINFS[+79.966]YE.V		M[+16], S[+80]	716.984	3	2148.94	2148.92	0	5.6	17	Non	459.83	459.83	28.29	6	1509	>sp|P02817|AMELX_BOVIN Amelogenin, X isoform OS=Bos taurus OX=9913 GN=AMELX PE=1 SV=2	1	hf1_10472_ebo_36_1_261219.ScanId;v=1;d1=16161.16161.3	controllerType=0 controllerNumber=1 scan=16161	37.7884
21140:2	1	S.M[+15.995]PLPPHPGHPGYIN[+0.984]FS[+79.966]YE.V		M[+16], N[+1], S[+80]	1075.46	2	2149.92	2149.91	0	5.8	17	Non	278.53	278.53	19.72	4.83	1509	>sp|P02817|AMELX_BOVIN Amelogenin, X isoform OS=Bos taurus OX=9913 GN=AMELX PE=1 SV=2	1	hf1_10472_ebo_36_1_261219.ScanId;v=1;d1=16902.16902.2	controllerType=0 controllerNumber=1 scan=16902	39.1262
20889:3	1	S.M[+15.995]PLPPHPGHPGYIN[+0.984]FS[+79.966]YE.V		M[+16], N[+1], S[+80]	717.312	3	2149.92	2149.91	0	6.1	17	Non	341.5	341.5	25.35	4.91	1509	>sp|P02817|AMELX_BOVIN Amelogenin, X isoform OS=Bos taurus OX=9913 GN=AMELX PE=1 SV=2	1	hf1_10472_ebo_36_1_261219.ScanId;v=1;d1=16732.16732.3	controllerType=0 controllerNumber=1 scan=16732	38.8206
21187:3	1	S.M[+15.995]PLPPHPGHPGYIN[+0.984]FS[+79.966]YE.V		M[+16], N[+1], S[+80]	717.311	3	2149.92	2149.91	0	5	17	Non	352.94	352.94	21.17	4.91	1509	>sp|P02817|AMELX_BOVIN Amelogenin, X isoform OS=Bos taurus OX=9913 GN=AMELX PE=1 SV=2	1	hf1_10472_ebo_36_1_261219.ScanId;v=1;d1=16933.16933.3	controllerType=0 controllerNumber=1 scan=16933	39.1798
23081:3	1	S.MP[+15.995]LPPHPGHPGYINFS[+79.966]YEV.L		P[+16], S[+80]	750.005	3	2248	2247.99	0	3.4	17	Non	172.26	172.26	5.8	2.41	1509	>sp|P02817|AMELX_BOVIN Amelogenin, X isoform OS=Bos taurus OX=9913 GN=AMELX PE=1 SV=2	1	hf1_10472_ebo_36_1_261219.ScanId;v=1;d1=18156.18156.3	controllerType=0 controllerNumber=1 scan=18156	41.347
28765:3	1	S.MPLPPHPGHPGYINFS[+79.966]YEVL.T		S[+80]	782.371	3	2345.1	2345.08	0	6.4	17	Non	240.53	240.53	105.42	4.28	1509	>sp|P02817|AMELX_BOVIN Amelogenin, X isoform OS=Bos taurus OX=9913 GN=AMELX PE=1 SV=2	1	hf1_10472_ebo_36_1_261219.ScanId;v=1;d1=21860.21860.3	controllerType=0 controllerNumber=1 scan=21860	47.9189
45262:3	1	S.MP[+15.995]LPPHPGHPGYINFS[+79.966]YEVL.T		P[+16], S[+80]	787.704	3	2361.1	2361.08	0	8.5	17	Non	190.12	190.12	4	2.34	1509	>sp|P02817|AMELX_BOVIN Amelogenin, X isoform OS=Bos taurus OX=9913 GN=AMELX PE=1 SV=2	1	hf1_10472_ebo_36_1_261219.ScanId;v=1;d1=33673.33673.4	controllerType=0 controllerNumber=1 scan=33673	73.5309
27335:2	1	S.M[+15.995]PLPPHPGHPGYINFS[+79.966]YEVL.T		M[+16], S[+80]	1181.05	2	2361.1	2361.08	0	8.9	17	Non	196.61	196.61	10.2	2.43	1509	>sp|P02817|AMELX_BOVIN Amelogenin, X isoform OS=Bos taurus OX=9913 GN=AMELX PE=1 SV=2	1	hf1_10472_ebo_36_1_261219.ScanId;v=1;d1=20960.20960.2	controllerType=0 controllerNumber=1 scan=20960	46.2888
27213:3	1	S.MP[+15.995]LPPHPGHPGYINFS[+79.966]YEVL.T		P[+16], S[+80]	787.702	3	2361.09	2361.08	0	6.6	17	Non	257.9	257.9	4	4.28	1509	>sp|P02817|AMELX_BOVIN Amelogenin, X isoform OS=Bos taurus OX=9913 GN=AMELX PE=1 SV=2	1	hf1_10472_ebo_36_1_261219.ScanId;v=1;d1=20877.20877.3	controllerType=0 controllerNumber=1 scan=20877	46.1408
26899:3	1	S.MP[+15.995]LPPHPGHPGYINFS[+79.966]YEVL.T		P[+16], S[+80]	787.701	3	2361.09	2361.08	0	5.2	17	Non	295.74	295.74	4	4.53	1509	>sp|P02817|AMELX_BOVIN Amelogenin, X isoform OS=Bos taurus OX=9913 GN=AMELX PE=1 SV=2	1	hf1_10472_ebo_36_1_261219.ScanId;v=1;d1=20676.20676.3	controllerType=0 controllerNumber=1 scan=20676	45.7828
26583:3	1	S.MP[+15.995]LPPHPGHPGYINFS[+79.966]YEVL.T		P[+16], S[+80]	787.702	3	2361.09	2361.08	0	6.2	17	Non	305.27	305.27	4	4.53	1509	>sp|P02817|AMELX_BOVIN Amelogenin, X isoform OS=Bos taurus OX=9913 GN=AMELX PE=1 SV=2	1	hf1_10472_ebo_36_1_261219.ScanId;v=1;d1=20472.20472.3	controllerType=0 controllerNumber=1 scan=20472	45.4256
26391:2	1	S.M[+15.995]PLPPHPGHPGYINFS[+79.966]YEVL.T		M[+16], S[+80]	1181.05	2	2361.09	2361.08	0	6.8	17	Non	309.08	309.08	15.51	4.69	1509	>sp|P02817|AMELX_BOVIN Amelogenin, X isoform OS=Bos taurus OX=9913 GN=AMELX PE=1 SV=2	1	hf1_10472_ebo_36_1_261219.ScanId;v=1;d1=20345.20345.2	controllerType=0 controllerNumber=1 scan=20345	45.2026
27009:2	1	S.M[+15.995]PLPPHPGHPGYINFS[+79.966]YEVL.T		M[+16], S[+80]	1181.05	2	2361.09	2361.08	0	7.3	17	Non	411.25	411.25	6.52	6	1509	>sp|P02817|AMELX_BOVIN Amelogenin, X isoform OS=Bos taurus OX=9913 GN=AMELX PE=1 SV=2	1	hf1_10472_ebo_36_1_261219.ScanId;v=1;d1=20746.20746.2	controllerType=0 controllerNumber=1 scan=20746	45.9077
26694:2	1	S.M[+15.995]PLPPHPGHPGYINFS[+79.966]YEVL.T		M[+16], S[+80]	1181.05	2	2361.09	2361.08	0	6.7	17	Non	492.47	492.47	15.52	6.12	1509	>sp|P02817|AMELX_BOVIN Amelogenin, X isoform OS=Bos taurus OX=9913 GN=AMELX PE=1 SV=2	1	hf1_10472_ebo_36_1_261219.ScanId;v=1;d1=20544.20544.2	controllerType=0 controllerNumber=1 scan=20544	45.5521
27665:2	1	S.MP[+15.995]LPPHPGHPGYIN[+0.984]FS[+79.966]YEVL.T		N[+1], P[+16], S[+80]	1181.54	2	2362.07	2362.06	0	5.6	17	Non	160.88	134.1	5.5	2.32	1509	>sp|P02817|AMELX_BOVIN Amelogenin, X isoform OS=Bos taurus OX=9913 GN=AMELX PE=1 SV=2	1	hf1_10472_ebo_36_1_261219.ScanId;v=1;d1=21168.21168.2	controllerType=0 controllerNumber=1 scan=21168	46.6685
27821:3	1	S.MP[+15.995]LPPHPGHPGYIN[+0.984]FS[+79.966]YEVL.T		N[+1], P[+16], S[+80]	788.029	3	2362.07	2362.06	0	5.3	17	Non	179.04	179.04	4	2.28	1509	>sp|P02817|AMELX_BOVIN Amelogenin, X isoform OS=Bos taurus OX=9913 GN=AMELX PE=1 SV=2	1	hf1_10472_ebo_36_1_261219.ScanId;v=1;d1=21267.21267.3	controllerType=0 controllerNumber=1 scan=21267	46.8528
27518:3	1	S.MP[+15.995]LPPHPGHPGYIN[+0.984]FS[+79.966]YEVL.T		N[+1], P[+16], S[+80]	788.03	3	2362.08	2362.06	0	6.2	17	Non	211.14	211.14	4	2.72	1509	>sp|P02817|AMELX_BOVIN Amelogenin, X isoform OS=Bos taurus OX=9913 GN=AMELX PE=1 SV=2	1	hf1_10472_ebo_36_1_261219.ScanId;v=1;d1=21076.21076.3	controllerType=0 controllerNumber=1 scan=21076	46.4998
27351:2	1	S.MP[+15.995]LPPHPGHPGYIN[+0.984]FS[+79.966]YEVL.T		N[+1], P[+16], S[+80]	1181.55	2	2362.08	2362.06	0	9.2	17	Non	221.52	221.52	9.23	2.7	1509	>sp|P02817|AMELX_BOVIN Amelogenin, X isoform OS=Bos taurus OX=9913 GN=AMELX PE=1 SV=2	1	hf1_10472_ebo_36_1_261219.ScanId;v=1;d1=20970.20970.2	controllerType=0 controllerNumber=1 scan=20970	46.307
25167:3	1	S.MP[+15.995]LPPHPGHPGYINFSYEVLTP.L		P[+16]	827.079	3	2479.22	2479.21	0	4.5	17	Non	262.45	262.45	4	4.58	1509	>sp|P02817|AMELX_BOVIN Amelogenin, X isoform OS=Bos taurus OX=9913 GN=AMELX PE=1 SV=2	1	hf1_10472_ebo_36_1_261219.ScanId;v=1;d1=19528.19528.3	controllerType=0 controllerNumber=1 scan=19528	43.7581
26703:2	1	S.MP[+15.995]LPPHPGHPGYINFS[+79.966]YEVLTP.L		P[+16], S[+80]	1280.1	2	2559.2	2559.18	0	8.9	17	Non	178.01	178.01	14.04	2.25	1509	>sp|P02817|AMELX_BOVIN Amelogenin, X isoform OS=Bos taurus OX=9913 GN=AMELX PE=1 SV=2	1	hf1_10472_ebo_36_1_261219.ScanId;v=1;d1=20549.20549.2	controllerType=0 controllerNumber=1 scan=20549	45.5592
18050:4	1	S.MP[+15.995]LPPHPGHP[+15.995]GYINFSYEVLTP.L		P[+16]*2	624.556	4	2495.2	2495.21	0	-1.3	17	Non	217.61	217.61	3.65	2.21	1509	>sp|P02817|AMELX_BOVIN Amelogenin, X isoform OS=Bos taurus OX=9913 GN=AMELX PE=1 SV=2	1	hf1_10472_ebo_36_1_261219.ScanId;v=1;d1=14798.14798.3	controllerType=0 controllerNumber=1 scan=14798	35.3213
26460:3	1	S.MP[+15.995]LPPHPGHPGYINFS[+79.966]YEVLTP.L		P[+16], S[+80]	853.735	3	2559.19	2559.18	0	5.2	17	Non	234.89	234.89	4	2.89	1509	>sp|P02817|AMELX_BOVIN Amelogenin, X isoform OS=Bos taurus OX=9913 GN=AMELX PE=1 SV=2	1	hf1_10472_ebo_36_1_261219.ScanId;v=1;d1=20390.20390.3	controllerType=0 controllerNumber=1 scan=20390	45.2808
26559:3	1	S.MP[+15.995]LPPHPGHPGYINFS[+79.966]YEVLTP.L		P[+16], S[+80]	853.736	3	2559.19	2559.18	0	5.7	17	Non	279.93	279.93	9.65	4.58	1509	>sp|P02817|AMELX_BOVIN Amelogenin, X isoform OS=Bos taurus OX=9913 GN=AMELX PE=1 SV=2	1	hf1_10472_ebo_36_1_261219.ScanId;v=1;d1=20455.20455.3	controllerType=0 controllerNumber=1 scan=20455	45.3945
32322:3	1	S.MPLPPHPGHPGYINFS[+79.966]YEVLTPL.K		S[+80]	886.1	3	2656.29	2656.27	0	7.3	17	Non	305.55	305.55	74.56	4.68	1509	>sp|P02817|AMELX_BOVIN Amelogenin, X isoform OS=Bos taurus OX=9913 GN=AMELX PE=1 SV=2	1	hf1_10472_ebo_36_1_261219.ScanId;v=1;d1=24140.24140.3	controllerType=0 controllerNumber=1 scan=24140	52.0452
32027:3	1	S.MPLPPHPGHPGYINFS[+79.966]YEVLTPL.K		S[+80]	886.103	3	2656.29	2656.27	0	10	17	Non	349.91	349.91	68.27	4.19	1509	>sp|P02817|AMELX_BOVIN Amelogenin, X isoform OS=Bos taurus OX=9913 GN=AMELX PE=1 SV=2	1	hf1_10472_ebo_36_1_261219.ScanId;v=1;d1=23953.23953.3	controllerType=0 controllerNumber=1 scan=23953	51.6993
28457:3	1	S.MP[+15.995]LPPHPGHPGYINFSYEVLTPL.K		P[+16]	864.775	3	2592.31	2592.3	0	5.8	17	Non	390.38	390.38	4	6.11	1509	>sp|P02817|AMELX_BOVIN Amelogenin, X isoform OS=Bos taurus OX=9913 GN=AMELX PE=1 SV=2	1	hf1_10472_ebo_36_1_261219.ScanId;v=1;d1=21666.21666.3	controllerType=0 controllerNumber=1 scan=21666	47.5714
28758:3	1	S.MP[+15.995]LPPHPGHPGYINFSYEVLTPL.K		P[+16]	864.775	3	2592.31	2592.3	0	5.7	17	Non	413.84	413.84	4	6.06	1509	>sp|P02817|AMELX_BOVIN Amelogenin, X isoform OS=Bos taurus OX=9913 GN=AMELX PE=1 SV=2	1	hf1_10472_ebo_36_1_261219.ScanId;v=1;d1=21856.21856.3	controllerType=0 controllerNumber=1 scan=21856	47.9128
43622:3	1	S.MP[+15.995]LPPHPGHPGYINFS[+79.966]YEVLTPL.K		P[+16], S[+80]	891.428	3	2672.27	2672.26	0	2.3	17	Non	24.98	24.98	4	2.22	1509	>sp|P02817|AMELX_BOVIN Amelogenin, X isoform OS=Bos taurus OX=9913 GN=AMELX PE=1 SV=2	1	hf1_10472_ebo_36_1_261219.ScanId;v=1;d1=31514.31514.3	controllerType=0 controllerNumber=1 scan=31514	65.7546
43041:3	1	S.MP[+15.995]LPPHPGHPGYINFS[+79.966]YEVLTPL.K		P[+16], S[+80]	891.425	3	2672.26	2672.26	0	0	17	Non	70.63	70.63	4	2.22	1509	>sp|P02817|AMELX_BOVIN Amelogenin, X isoform OS=Bos taurus OX=9913 GN=AMELX PE=1 SV=2	1	hf1_10472_ebo_36_1_261219.ScanId;v=1;d1=30947.30947.3	controllerType=0 controllerNumber=1 scan=30947	64.3595
36932:3	1	S.MP[+15.995]LPPHPGHPGYINFS[+79.966]YEVLTPL.K		P[+16], S[+80]	891.433	3	2672.28	2672.26	0	7.9	17	Non	95.99	95.99	0.47	1.45	1509	>sp|P02817|AMELX_BOVIN Amelogenin, X isoform OS=Bos taurus OX=9913 GN=AMELX PE=1 SV=2	1	hf1_10472_ebo_36_1_261219.ScanId;v=1;d1=27093.27093.3	controllerType=0 controllerNumber=1 scan=27093	57.4403
41208:3	1	S.MP[+15.995]LPPHPGHPGYINFS[+79.966]YEVLTPL.K		P[+16], S[+80]	891.431	3	2672.28	2672.26	0	5.8	17	Non	110.28	110.28	4	2.25	1509	>sp|P02817|AMELX_BOVIN Amelogenin, X isoform OS=Bos taurus OX=9913 GN=AMELX PE=1 SV=2	1	hf1_10472_ebo_36_1_261219.ScanId;v=1;d1=29780.29780.3	controllerType=0 controllerNumber=1 scan=29780	62.267
41526:3	1	S.MP[+15.995]LPPHPGHPGYINFS[+79.966]YEVLTPL.K		P[+16], S[+80]	891.43	3	2672.28	2672.26	0	5	17	Non	124.75	124.75	4	2.32	1509	>sp|P02817|AMELX_BOVIN Amelogenin, X isoform OS=Bos taurus OX=9913 GN=AMELX PE=1 SV=2	1	hf1_10472_ebo_36_1_261219.ScanId;v=1;d1=29982.29982.3	controllerType=0 controllerNumber=1 scan=29982	62.6247
35561:3	1	S.MP[+15.995]LPPHPGHPGYINFS[+79.966]YEVLTPL.K		P[+16], S[+80]	891.431	3	2672.28	2672.26	0	6.5	17	Non	131.68	131.68	4	2.21	1509	>sp|P02817|AMELX_BOVIN Amelogenin, X isoform OS=Bos taurus OX=9913 GN=AMELX PE=1 SV=2	1	hf1_10472_ebo_36_1_261219.ScanId;v=1;d1=26237.26237.3	controllerType=0 controllerNumber=1 scan=26237	55.9009
41833:3	1	S.MP[+15.995]LPPHPGHPGYINFS[+79.966]YEVLTPL.K		P[+16], S[+80]	891.432	3	2672.28	2672.26	0	6.7	17	Non	136.06	136.06	4	2.44	1509	>sp|P02817|AMELX_BOVIN Amelogenin, X isoform OS=Bos taurus OX=9913 GN=AMELX PE=1 SV=2	1	hf1_10472_ebo_36_1_261219.ScanId;v=1;d1=30178.30178.3	controllerType=0 controllerNumber=1 scan=30178	62.9772
42139:3	1	S.MP[+15.995]LPPHPGHPGYINFS[+79.966]YEVLTPL.K		P[+16], S[+80]	891.432	3	2672.28	2672.26	0	6.8	17	Non	152.24	152.24	4	2.44	1509	>sp|P02817|AMELX_BOVIN Amelogenin, X isoform OS=Bos taurus OX=9913 GN=AMELX PE=1 SV=2	1	hf1_10472_ebo_36_1_261219.ScanId;v=1;d1=30370.30370.3	controllerType=0 controllerNumber=1 scan=30370	63.3224
38395:3	1	S.MP[+15.995]LPPHPGHPGYINFS[+79.966]YEVLTPL.K		P[+16], S[+80]	891.43	3	2672.28	2672.26	0	5	17	Non	159.88	159.88	4	2.32	1509	>sp|P02817|AMELX_BOVIN Amelogenin, X isoform OS=Bos taurus OX=9913 GN=AMELX PE=1 SV=2	1	hf1_10472_ebo_36_1_261219.ScanId;v=1;d1=28010.28010.3	controllerType=0 controllerNumber=1 scan=28010	59.0895
36617:3	1	S.MP[+15.995]LPPHPGHPGYINFS[+79.966]YEVLTPL.K		P[+16], S[+80]	891.431	3	2672.28	2672.26	0	6.3	17	Non	172.53	172.53	4	2.85	1509	>sp|P02817|AMELX_BOVIN Amelogenin, X isoform OS=Bos taurus OX=9913 GN=AMELX PE=1 SV=2	1	hf1_10472_ebo_36_1_261219.ScanId;v=1;d1=26901.26901.3	controllerType=0 controllerNumber=1 scan=26901	57.094
42456:3	1	S.MP[+15.995]LPPHPGHPGYINFS[+79.966]YEVLTPL.K		P[+16], S[+80]	891.43	3	2672.28	2672.26	0	5.5	17	Non	185.08	185.08	4	2.85	1509	>sp|P02817|AMELX_BOVIN Amelogenin, X isoform OS=Bos taurus OX=9913 GN=AMELX PE=1 SV=2	1	hf1_10472_ebo_36_1_261219.ScanId;v=1;d1=30562.30562.3	controllerType=0 controllerNumber=1 scan=30562	63.6668
34112:3	1	S.MP[+15.995]LPPHPGHPGYINFS[+79.966]YEVLTPL.K		P[+16], S[+80]	891.432	3	2672.28	2672.26	0	7.2	17	Non	195.77	195.77	5.8	2.79	1509	>sp|P02817|AMELX_BOVIN Amelogenin, X isoform OS=Bos taurus OX=9913 GN=AMELX PE=1 SV=2	1	hf1_10472_ebo_36_1_261219.ScanId;v=1;d1=25316.25316.3	controllerType=0 controllerNumber=1 scan=25316	54.2211
45170:3	1	S.MP[+15.995]LPPHPGHPGYINFS[+79.966]YEVLTPL.K		P[+16], S[+80]	891.429	3	2672.27	2672.26	0	4.3	17	Non	197.84	197.84	4	2.98	1509	>sp|P02817|AMELX_BOVIN Amelogenin, X isoform OS=Bos taurus OX=9913 GN=AMELX PE=1 SV=2	1	hf1_10472_ebo_36_1_261219.ScanId;v=1;d1=33604.33604.3	controllerType=0 controllerNumber=1 scan=33604	73.4096
35250:3	1	S.MP[+15.995]LPPHPGHPGYINFS[+79.966]YEVLTPL.K		P[+16], S[+80]	891.43	3	2672.28	2672.26	0	5.2	17	Non	200.8	200.8	4	3.29	1509	>sp|P02817|AMELX_BOVIN Amelogenin, X isoform OS=Bos taurus OX=9913 GN=AMELX PE=1 SV=2	1	hf1_10472_ebo_36_1_261219.ScanId;v=1;d1=26037.26037.3	controllerType=0 controllerNumber=1 scan=26037	55.5414
33799:3	1	S.MP[+15.995]LPPHPGHPGYINFS[+79.966]YEVLTPL.K		P[+16], S[+80]	891.432	3	2672.28	2672.26	0	6.7	17	Non	205.37	205.37	5.8	2.83	1509	>sp|P02817|AMELX_BOVIN Amelogenin, X isoform OS=Bos taurus OX=9913 GN=AMELX PE=1 SV=2	1	hf1_10472_ebo_36_1_261219.ScanId;v=1;d1=25113.25113.3	controllerType=0 controllerNumber=1 scan=25113	53.8472
31199:2	1	S.MP[+15.995]LPPHPGHPGYINFS[+79.966]YEVLTPL.K		P[+16], S[+80]	1336.64	2	2672.27	2672.26	0	1.4	17	Non	282.25	282.25	4	4.27	1509	>sp|P02817|AMELX_BOVIN Amelogenin, X isoform OS=Bos taurus OX=9913 GN=AMELX PE=1 SV=2	1	hf1_10472_ebo_36_1_261219.ScanId;v=1;d1=23416.23416.2	controllerType=0 controllerNumber=1 scan=23416	50.7244
32494:3	1	S.MP[+15.995]LPPHPGHPGYINFS[+79.966]YEVLTPL.K		P[+16], S[+80]	891.428	3	2672.27	2672.26	0	3.4	17	Non	294.84	294.84	4	4.24	1509	>sp|P02817|AMELX_BOVIN Amelogenin, X isoform OS=Bos taurus OX=9913 GN=AMELX PE=1 SV=2	1	hf1_10472_ebo_36_1_261219.ScanId;v=1;d1=24257.24257.4	controllerType=0 controllerNumber=1 scan=24257	52.2592
29982:3	1	S.MP[+15.995]LPPHPGHPGYINFS[+79.966]YEVLTPL.K		P[+16], S[+80]	891.429	3	2672.27	2672.26	0	3.9	17	Non	323.48	323.48	4	4.39	1509	>sp|P02817|AMELX_BOVIN Amelogenin, X isoform OS=Bos taurus OX=9913 GN=AMELX PE=1 SV=2	1	hf1_10472_ebo_36_1_261219.ScanId;v=1;d1=22619.22619.3	controllerType=0 controllerNumber=1 scan=22619	49.2843
30613:2	1	S.MP[+15.995]LPPHPGHPGYINFS[+79.966]YEVLTPL.K		P[+16], S[+80]	1336.64	2	2672.28	2672.26	0	6.4	17	Non	333.19	333.19	3.4	5.08	1509	>sp|P02817|AMELX_BOVIN Amelogenin, X isoform OS=Bos taurus OX=9913 GN=AMELX PE=1 SV=2	1	hf1_10472_ebo_36_1_261219.ScanId;v=1;d1=23027.23027.2	controllerType=0 controllerNumber=1 scan=23027	50.0196
31460:3	1	S.MP[+15.995]LPPHPGHPGYINFS[+79.966]YEVLTPL.K		P[+16], S[+80]	891.426	3	2672.26	2672.26	0	0.7	17	Non	346.94	346.94	4	4.18	1509	>sp|P02817|AMELX_BOVIN Amelogenin, X isoform OS=Bos taurus OX=9913 GN=AMELX PE=1 SV=2	1	hf1_10472_ebo_36_1_261219.ScanId;v=1;d1=23584.23584.3	controllerType=0 controllerNumber=1 scan=23584	51.0259
31868:3	1	S.MP[+15.995]LPPHPGHPGYINFS[+79.966]YEVLTPL.K		P[+16], S[+80]	891.428	3	2672.27	2672.26	0	3.3	17	Non	351.48	351.48	4	4.39	1509	>sp|P02817|AMELX_BOVIN Amelogenin, X isoform OS=Bos taurus OX=9913 GN=AMELX PE=1 SV=2	1	hf1_10472_ebo_36_1_261219.ScanId;v=1;d1=23855.23855.6	controllerType=0 controllerNumber=1 scan=23855	51.5196
29381:3	1	S.MP[+15.995]LPPHPGHPGYIN[+0.984]FSYEVLTPL.K		N[+1], P[+16]	865.103	3	2593.29	2593.28	0	5.7	17	Non	353.46	353.46	4	5.14	1509	>sp|P02817|AMELX_BOVIN Amelogenin, X isoform OS=Bos taurus OX=9913 GN=AMELX PE=1 SV=2	1	hf1_10472_ebo_36_1_261219.ScanId;v=1;d1=22243.22243.4	controllerType=0 controllerNumber=1 scan=22243	48.6133
30577:3	1	S.MP[+15.995]LPPHPGHPGYINFS[+79.966]YEVLTPL.K		P[+16], S[+80]	891.43	3	2672.27	2672.26	0	4.8	17	Non	380.69	380.69	4	5.82	1509	>sp|P02817|AMELX_BOVIN Amelogenin, X isoform OS=Bos taurus OX=9913 GN=AMELX PE=1 SV=2	1	hf1_10472_ebo_36_1_261219.ScanId;v=1;d1=23003.23003.3	controllerType=0 controllerNumber=1 scan=23003	49.9775
30279:3	1	S.MP[+15.995]LPPHPGHPGYINFS[+79.966]YEVLTPL.K		P[+16], S[+80]	891.428	3	2672.27	2672.26	0	3.1	17	Non	394.07	394.07	4	5.52	1509	>sp|P02817|AMELX_BOVIN Amelogenin, X isoform OS=Bos taurus OX=9913 GN=AMELX PE=1 SV=2	1	hf1_10472_ebo_36_1_261219.ScanId;v=1;d1=22813.22813.3	controllerType=0 controllerNumber=1 scan=22813	49.6398
30311:2	1	S.MP[+15.995]LPPHPGHPGYINFS[+79.966]YEVLTPL.K		P[+16], S[+80]	1336.64	2	2672.28	2672.26	0	5.3	17	Non	445.11	445.11	7.32	6.32	1509	>sp|P02817|AMELX_BOVIN Amelogenin, X isoform OS=Bos taurus OX=9913 GN=AMELX PE=1 SV=2	1	hf1_10472_ebo_36_1_261219.ScanId;v=1;d1=22834.22834.2	controllerType=0 controllerNumber=1 scan=22834	49.6774
29306:3	1	S.MP[+15.995]LPPHPGHP[+15.995]GYINFS[+79.966]YEVLTPL.K		P[+16]*2, S[+80]	896.76	3	2688.27	2688.26	0	3.2	17	Non	149.94	149.94	4	1.28	1509	>sp|P02817|AMELX_BOVIN Amelogenin, X isoform OS=Bos taurus OX=9913 GN=AMELX PE=1 SV=2	1	hf1_10472_ebo_36_1_261219.ScanId;v=1;d1=22198.22198.3	controllerType=0 controllerNumber=1 scan=22198	48.5337
30516:3	1	S.MP[+15.995]LPPHPGHPGYINFS[+79.966]Y[+15.995]EVLTPL.K		P[+16], S[+80], Y[+16]	896.76	3	2688.26	2688.26	0	2.7	17	Non	255.4	255.4	4	3.62	1509	>sp|P02817|AMELX_BOVIN Amelogenin, X isoform OS=Bos taurus OX=9913 GN=AMELX PE=1 SV=2	1	hf1_10472_ebo_36_1_261219.ScanId;v=1;d1=22964.22964.6	controllerType=0 controllerNumber=1 scan=22964	49.9074
30209:3	1	S.MP[+15.995]LPPHPGHPGYINFS[+79.966]Y[+15.995]EVLTPL.K		P[+16], S[+80], Y[+16]	896.759	3	2688.26	2688.26	0	2.6	17	Non	259.79	259.79	4	3.62	1509	>sp|P02817|AMELX_BOVIN Amelogenin, X isoform OS=Bos taurus OX=9913 GN=AMELX PE=1 SV=2	1	hf1_10472_ebo_36_1_261219.ScanId;v=1;d1=22766.22766.3	controllerType=0 controllerNumber=1 scan=22766	49.5519
29623:3	1	S.MP[+15.995]LPPHPGHP[+15.995]GYINFS[+79.966]YEVLTPL.K		P[+16]*2, S[+80]	896.761	3	2688.27	2688.26	0	4	17	Non	265.48	265.48	1.92	4.07	1509	>sp|P02817|AMELX_BOVIN Amelogenin, X isoform OS=Bos taurus OX=9913 GN=AMELX PE=1 SV=2	1	hf1_10472_ebo_36_1_261219.ScanId;v=1;d1=22391.22391.3	controllerType=0 controllerNumber=1 scan=22391	48.8799
31796:3	1	S.MP[+15.995]LPPHPGHPGYIN[+0.984]FS[+79.966]YEVLTPL.K		N[+1], P[+16], S[+80]	891.759	3	2673.26	2673.25	0	6.6	17	Non	269.32	261.3	4	4.05	1509	>sp|P02817|AMELX_BOVIN Amelogenin, X isoform OS=Bos taurus OX=9913 GN=AMELX PE=1 SV=2	1	hf1_10472_ebo_36_1_261219.ScanId;v=1;d1=23809.23809.5	controllerType=0 controllerNumber=1 scan=23809	51.4389
31163:3	1	S.MP[+15.995]LPPHPGHPGYIN[+0.984]FS[+79.966]YEVLTPL.K		N[+1], P[+16], S[+80]	891.758	3	2673.26	2673.25	0	5.3	17	Non	352.71	352.71	4	4.91	1509	>sp|P02817|AMELX_BOVIN Amelogenin, X isoform OS=Bos taurus OX=9913 GN=AMELX PE=1 SV=2	1	hf1_10472_ebo_36_1_261219.ScanId;v=1;d1=23389.23389.3	controllerType=0 controllerNumber=1 scan=23389	50.675
30877:3	1	S.MP[+15.995]LPPHPGHPGYIN[+0.984]FS[+79.966]YEVLTPL.K		N[+1], P[+16], S[+80]	891.76	3	2673.27	2673.25	0	7.9	17	Non	379.06	379.06	4	5.97	1509	>sp|P02817|AMELX_BOVIN Amelogenin, X isoform OS=Bos taurus OX=9913 GN=AMELX PE=1 SV=2	1	hf1_10472_ebo_36_1_261219.ScanId;v=1;d1=23200.23200.3	controllerType=0 controllerNumber=1 scan=23200	50.3357
43403:3	1	S.MP[+15.995]LPPHPGHP[+31.990]GY[+31.990]INFSY[+15.995]EVLTPL.K		P[+16][+32], Y[+16][+32]	891.43	3	2672.27	2672.27	0	1.6	17	Non	10.53	10.53	0	2.21	1509	>sp|P02817|AMELX_BOVIN Amelogenin, X isoform OS=Bos taurus OX=9913 GN=AMELX PE=1 SV=2	1	hf1_10472_ebo_36_1_261219.ScanId;v=1;d1=31270.31270.3	controllerType=0 controllerNumber=1 scan=31270	65.0666
32575:2	1	S.MP[+15.995]LPPHP[+15.995]GHPGYINFS[+79.966]Y[+31.990]EVLTPL.K		P[+16]*2, S[+80], Y[+32]	1360.63	2	2720.26	2720.25	0	5.7	17	Non	50.04	50.04	0	2.21	1509	>sp|P02817|AMELX_BOVIN Amelogenin, X isoform OS=Bos taurus OX=9913 GN=AMELX PE=1 SV=2	1	hf1_10472_ebo_36_1_261219.ScanId;v=1;d1=24307.24307.2	controllerType=0 controllerNumber=1 scan=24307	52.349
43262:3	1	S.MP[+15.995]LPPHPGHP[+31.990]GY[+31.990]INFSY[+15.995]EVLTPL.K		P[+16][+32], Y[+16][+32]	891.429	3	2672.27	2672.27	0	1.3	17	Non	74.12	74.12	0	2.22	1509	>sp|P02817|AMELX_BOVIN Amelogenin, X isoform OS=Bos taurus OX=9913 GN=AMELX PE=1 SV=2	1	hf1_10472_ebo_36_1_261219.ScanId;v=1;d1=31131.31131.3	controllerType=0 controllerNumber=1 scan=31131	64.7225
40262:3	1	S.MP[+15.995]LPPHPGHP[+31.990]GY[+15.995]INF[+31.990]SYEVLTPL.K		F[+32], P[+16][+32], Y[+16]	891.433	3	2672.28	2672.27	0	5.2	17	Non	108.13	108.13	0	2.25	1509	>sp|P02817|AMELX_BOVIN Amelogenin, X isoform OS=Bos taurus OX=9913 GN=AMELX PE=1 SV=2	1	hf1_10472_ebo_36_1_261219.ScanId;v=1;d1=29185.29185.3	controllerType=0 controllerNumber=1 scan=29185	61.1987
39953:3	1	S.MP[+15.995]LPPHPGHP[+31.990]GY[+15.995]INF[+31.990]SYEVLTPL.K		F[+32], P[+16][+32], Y[+16]	891.428	3	2672.27	2672.27	0	-0.6	17	Non	111.47	111.47	0	2.21	1509	>sp|P02817|AMELX_BOVIN Amelogenin, X isoform OS=Bos taurus OX=9913 GN=AMELX PE=1 SV=2	1	hf1_10472_ebo_36_1_261219.ScanId;v=1;d1=28993.28993.3	controllerType=0 controllerNumber=1 scan=28993	60.8551
39638:3	1	S.MP[+15.995]LPPHPGHP[+15.995]GYINF[+31.990]SY[+31.990]EVLTPL.K		F[+32], P[+16]*2, Y[+32]	891.431	3	2672.28	2672.27	0	3.6	17	Non	131.73	131.73	0	2.24	1509	>sp|P02817|AMELX_BOVIN Amelogenin, X isoform OS=Bos taurus OX=9913 GN=AMELX PE=1 SV=2	1	hf1_10472_ebo_36_1_261219.ScanId;v=1;d1=28793.28793.3	controllerType=0 controllerNumber=1 scan=28793	60.4971
39036:3	1	S.MP[+15.995]LPPHP[+15.995]GHPGY[+31.990]INF[+31.990]SYEVLTPL.K		F[+32], P[+16]*2, Y[+32]	891.431	3	2672.28	2672.27	0	2.6	17	Non	134.93	134.93	0	2.24	1509	>sp|P02817|AMELX_BOVIN Amelogenin, X isoform OS=Bos taurus OX=9913 GN=AMELX PE=1 SV=2	1	hf1_10472_ebo_36_1_261219.ScanId;v=1;d1=28406.28406.3	controllerType=0 controllerNumber=1 scan=28406	59.7935
40573:3	1	S.MP[+15.995]LPPHPGHP[+31.990]GY[+15.995]INF[+31.990]SYEVLTPL.K		F[+32], P[+16][+32], Y[+16]	891.429	3	2672.27	2672.27	0	1.4	17	Non	136.94	136.94	0	2.27	1509	>sp|P02817|AMELX_BOVIN Amelogenin, X isoform OS=Bos taurus OX=9913 GN=AMELX PE=1 SV=2	1	hf1_10472_ebo_36_1_261219.ScanId;v=1;d1=29377.29377.3	controllerType=0 controllerNumber=1 scan=29377	61.5428
36239:3	1	S.MP[+15.995]LPPHP[+15.995]GHP[+31.990]GYINF[+31.990]SYEVLTPL.K		F[+32], P[+16]*2[+32]	891.431	3	2672.28	2672.27	0	3.1	17	Non	137.83	137.83	0	2.24	1509	>sp|P02817|AMELX_BOVIN Amelogenin, X isoform OS=Bos taurus OX=9913 GN=AMELX PE=1 SV=2	1	hf1_10472_ebo_36_1_261219.ScanId;v=1;d1=26669.26669.3	controllerType=0 controllerNumber=1 scan=26669	56.6759
38080:3	1	S.MP[+15.995]LPPHPGHP[+31.990]GY[+15.995]INF[+31.990]SYEVLTPL.K		F[+32], P[+16][+32], Y[+16]	891.432	3	2672.28	2672.27	0	4.3	17	Non	138.52	138.52	0	2.32	1509	>sp|P02817|AMELX_BOVIN Amelogenin, X isoform OS=Bos taurus OX=9913 GN=AMELX PE=1 SV=2	1	hf1_10472_ebo_36_1_261219.ScanId;v=1;d1=27809.27809.3	controllerType=0 controllerNumber=1 scan=27809	58.7243
45276:4	1	S.MPLPPHPGHPGYINFS[+79.966]YEVLTPLK.W		S[+80]	696.852	4	2784.39	2784.36	0	9.4	17	NRagged	198.13	198.13	19.71	3.29	1509	>sp|P02817|AMELX_BOVIN Amelogenin, X isoform OS=Bos taurus OX=9913 GN=AMELX PE=1 SV=2	1	hf1_10472_ebo_36_1_261219.ScanId;v=1;d1=33682.33682.4	controllerType=0 controllerNumber=1 scan=33682	73.5473
27033:4	1	S.MPLPPHPGHPGYIN[+0.984]FSYEVLTPLK.W		N[+1]	677.104	4	2705.4	2705.38	0	5.8	17	NRagged	351.1	295.3	295.3	5.77	1509	>sp|P02817|AMELX_BOVIN Amelogenin, X isoform OS=Bos taurus OX=9913 GN=AMELX PE=1 SV=2	1	hf1_10472_ebo_36_1_261219.ScanId;v=1;d1=20762.20762.4	controllerType=0 controllerNumber=1 scan=20762	45.9373
26361:4	1	S.MP[+15.995]LPPHPGHPGYINFSYEVLTPLK.W		P[+16]	680.856	4	2720.4	2720.39	0	4.6	17	NRagged	389.03	389.03	4	6.88	1509	>sp|P02817|AMELX_BOVIN Amelogenin, X isoform OS=Bos taurus OX=9913 GN=AMELX PE=1 SV=2	1	hf1_10472_ebo_36_1_261219.ScanId;v=1;d1=20324.20324.4	controllerType=0 controllerNumber=1 scan=20324	45.1652
24034:4	1	S.MP[+15.995]LPPHPGHPGYINFSYEVLTPLK.W		P[+16]	680.856	4	2720.4	2720.39	0	3.7	17	NRagged	420.4	420.4	2.43	6.46	1509	>sp|P02817|AMELX_BOVIN Amelogenin, X isoform OS=Bos taurus OX=9913 GN=AMELX PE=1 SV=2	1	hf1_10472_ebo_36_1_261219.ScanId;v=1;d1=18781.18781.4	controllerType=0 controllerNumber=1 scan=18781	42.4462
24336:4	1	S.M[+15.995]PLPPHPGHPGYINFSYEVLTPLK.W		M[+16]	680.856	4	2720.4	2720.39	0	4.6	17	NRagged	426.84	426.84	7.11	6.98	1509	>sp|P02817|AMELX_BOVIN Amelogenin, X isoform OS=Bos taurus OX=9913 GN=AMELX PE=1 SV=2	1	hf1_10472_ebo_36_1_261219.ScanId;v=1;d1=18980.18980.4	controllerType=0 controllerNumber=1 scan=18980	42.7978
25745:3	1	S.M[+15.995]PLPPHPGHPGYINFSYEVLTPLK.W		M[+16]	907.466	3	2720.38	2720.39	0	-3	17	NRagged	457.36	457.36	24.62	5.97	1509	>sp|P02817|AMELX_BOVIN Amelogenin, X isoform OS=Bos taurus OX=9913 GN=AMELX PE=1 SV=2	1	hf1_10472_ebo_36_1_261219.ScanId;v=1;d1=19908.19908.3	controllerType=0 controllerNumber=1 scan=19908	44.4266
25439:3	1	S.M[+15.995]PLPPHPGHPGYINFSYEVLTPLK.W		M[+16]	907.466	3	2720.38	2720.39	0	-2.3	17	NRagged	504.1	504.1	6.49	6.09	1509	>sp|P02817|AMELX_BOVIN Amelogenin, X isoform OS=Bos taurus OX=9913 GN=AMELX PE=1 SV=2	1	hf1_10472_ebo_36_1_261219.ScanId;v=1;d1=19708.19708.3	controllerType=0 controllerNumber=1 scan=19708	44.0739
23679:4	1	S.MP[+15.995]LPPHPGHPGYINFSYEVLTPLK.W		P[+16]	680.857	4	2720.41	2720.39	0	5.4	17	NRagged	511.52	511.52	4	7.54	1509	>sp|P02817|AMELX_BOVIN Amelogenin, X isoform OS=Bos taurus OX=9913 GN=AMELX PE=1 SV=2	1	hf1_10472_ebo_36_1_261219.ScanId;v=1;d1=18550.18550.4	controllerType=0 controllerNumber=1 scan=18550	42.0374
25862:4	1	S.MP[+15.995]LPPHPGHPGYINFSYEVLTPLK.W		P[+16]	680.85	4	2720.38	2720.39	0	-4.4	17	NRagged	516.84	497.16	4	6.12	1509	>sp|P02817|AMELX_BOVIN Amelogenin, X isoform OS=Bos taurus OX=9913 GN=AMELX PE=1 SV=2	1	hf1_10472_ebo_36_1_261219.ScanId;v=1;d1=19986.19986.4	controllerType=0 controllerNumber=1 scan=19986	44.5606
45236:3	1	S.MPLPPHPGHPGYINFS[+79.966]YEVLTPLK.W		S[+80]	928.798	3	2784.38	2784.36	0	6.8	17	NRagged	530.23	530.23	208.82	7.83	1509	>sp|P02817|AMELX_BOVIN Amelogenin, X isoform OS=Bos taurus OX=9913 GN=AMELX PE=1 SV=2	1	hf1_10472_ebo_36_1_261219.ScanId;v=1;d1=33653.33653.3	controllerType=0 controllerNumber=1 scan=33653	73.4951
27520:4	1	S.MPLPPHPGHPGYINFS[+79.966]YEVLTPLK.W		S[+80]	696.85	4	2784.38	2784.36	0	6.3	17	NRagged	627.58	627.58	297.37	9.39	1509	>sp|P02817|AMELX_BOVIN Amelogenin, X isoform OS=Bos taurus OX=9913 GN=AMELX PE=1 SV=2	1	hf1_10472_ebo_36_1_261219.ScanId;v=1;d1=21077.21077.6	controllerType=0 controllerNumber=1 scan=21077	46.5013
24630:4	1	S.MP[+15.995]LPPHPGHPGYINFSYEVLTPLK.W		P[+16]	680.856	4	2720.4	2720.39	0	4.7	17	NRagged	637.33	637.33	4	9.47	1509	>sp|P02817|AMELX_BOVIN Amelogenin, X isoform OS=Bos taurus OX=9913 GN=AMELX PE=1 SV=2	1	hf1_10472_ebo_36_1_261219.ScanId;v=1;d1=19177.19177.4	controllerType=0 controllerNumber=1 scan=19177	43.1429
28230:4	1	S.MPLPPHPGHPGYINFS[+79.966]YEVLTPLK.W		S[+80]	696.848	4	2784.37	2784.36	0	2.6	17	NRagged	666.03	666.03	277.4	9.94	1509	>sp|P02817|AMELX_BOVIN Amelogenin, X isoform OS=Bos taurus OX=9913 GN=AMELX PE=1 SV=2	1	hf1_10472_ebo_36_1_261219.ScanId;v=1;d1=21518.21518.6	controllerType=0 controllerNumber=1 scan=21518	47.311
24938:4	1	S.M[+15.995]PLPPHPGHPGYINFSYEVLTPLK.W		M[+16]	680.856	4	2720.4	2720.39	0	4.3	17	NRagged	681.14	681.14	3.28	10.47	1509	>sp|P02817|AMELX_BOVIN Amelogenin, X isoform OS=Bos taurus OX=9913 GN=AMELX PE=1 SV=2	1	hf1_10472_ebo_36_1_261219.ScanId;v=1;d1=19376.19376.4	controllerType=0 controllerNumber=1 scan=19376	43.489
27917:4	1	S.MPLPPHPGHPGYINFS[+79.966]YEVLTPLK.W		S[+80]	696.85	4	2784.38	2784.36	0	5.9	17	NRagged	792.5	792.5	411.23	12.47	1509	>sp|P02817|AMELX_BOVIN Amelogenin, X isoform OS=Bos taurus OX=9913 GN=AMELX PE=1 SV=2	1	hf1_10472_ebo_36_1_261219.ScanId;v=1;d1=21327.21327.4	controllerType=0 controllerNumber=1 scan=21327	46.9608
27625:4	1	S.MPLPPHPGHPGYINFS[+79.966]YEVLTPLK.W		S[+80]	696.85	4	2784.38	2784.36	0	6	17	NRagged	835.9	835.9	451.15	13.47	1509	>sp|P02817|AMELX_BOVIN Amelogenin, X isoform OS=Bos taurus OX=9913 GN=AMELX PE=1 SV=2	1	hf1_10472_ebo_36_1_261219.ScanId;v=1;d1=21143.21143.4	controllerType=0 controllerNumber=1 scan=21143	46.625
24541:3	1	S.M[+15.995]PLPPHPGHPGYINFSYEVLTPLK.W		M[+16]	907.473	3	2720.41	2720.39	0	5.5	17	NRagged	871.1	871.1	50.75	14.71	1509	>sp|P02817|AMELX_BOVIN Amelogenin, X isoform OS=Bos taurus OX=9913 GN=AMELX PE=1 SV=2	1	hf1_10472_ebo_36_1_261219.ScanId;v=1;d1=19117.19117.3	controllerType=0 controllerNumber=1 scan=19117	43.0361
24850:3	1	S.M[+15.995]PLPPHPGHPGYINFSYEVLTPLK.W		M[+16]	907.472	3	2720.4	2720.39	0	4.5	17	NRagged	873.93	873.93	43.21	14.71	1509	>sp|P02817|AMELX_BOVIN Amelogenin, X isoform OS=Bos taurus OX=9913 GN=AMELX PE=1 SV=2	1	hf1_10472_ebo_36_1_261219.ScanId;v=1;d1=19321.19321.3	controllerType=0 controllerNumber=1 scan=19321	43.3932
28106:3	1	S.MPLPPHPGHPGYINFS[+79.966]YEVLTPLK.W		S[+80]	928.796	3	2784.37	2784.36	0	4.3	17	NRagged	995.93	995.93	452.09	16.71	1509	>sp|P02817|AMELX_BOVIN Amelogenin, X isoform OS=Bos taurus OX=9913 GN=AMELX PE=1 SV=2	1	hf1_10472_ebo_36_1_261219.ScanId;v=1;d1=21445.21445.3	controllerType=0 controllerNumber=1 scan=21445	47.1774
27802:3	1	S.MPLPPHPGHPGYINFS[+79.966]YEVLTPLK.W		S[+80]	928.797	3	2784.38	2784.36	0	5.4	17	NRagged	1189.55	1189.55	551.52	20.71	1509	>sp|P02817|AMELX_BOVIN Amelogenin, X isoform OS=Bos taurus OX=9913 GN=AMELX PE=1 SV=2	1	hf1_10472_ebo_36_1_261219.ScanId;v=1;d1=21256.21256.3	controllerType=0 controllerNumber=1 scan=21256	46.8334
44007:3	1	S.MP[+15.995]LPPHPGHPGYINFS[+79.966]YEVLTPLK.W		P[+16], S[+80]	934.125	3	2800.36	2800.36	0	1	17	NRagged	50.58	50.58	4	2.37	1509	>sp|P02817|AMELX_BOVIN Amelogenin, X isoform OS=Bos taurus OX=9913 GN=AMELX PE=1 SV=2	1	hf1_10472_ebo_36_1_261219.ScanId;v=1;d1=32041.32041.3	controllerType=0 controllerNumber=1 scan=32041	67.5745
45351:3	1	S.MP[+15.995]LPPHPGHPGYINFS[+79.966]YEVLTPLK.W		P[+16], S[+80]	934.13	3	2800.37	2800.36	0	6.1	17	NRagged	52.08	52.08	4	2.75	1509	>sp|P02817|AMELX_BOVIN Amelogenin, X isoform OS=Bos taurus OX=9913 GN=AMELX PE=1 SV=2	1	hf1_10472_ebo_36_1_261219.ScanId;v=1;d1=33829.33829.3	controllerType=0 controllerNumber=1 scan=33829	74.2469
43412:4	1	S.MP[+15.995]LPPHPGHPGYINFS[+79.966]YEVLTPLK.W		P[+16], S[+80]	700.848	4	2800.37	2800.36	0	4.4	17	NRagged	77.13	77.13	4	2.6	1509	>sp|P02817|AMELX_BOVIN Amelogenin, X isoform OS=Bos taurus OX=9913 GN=AMELX PE=1 SV=2	1	hf1_10472_ebo_36_1_261219.ScanId;v=1;d1=31277.31277.4	controllerType=0 controllerNumber=1 scan=31277	65.0812
00063:3	1	S.MP[+15.995]LPPHPGHPGYINFS[+79.966]YEVLTPLK.W		P[+16], S[+80]	934.13	3	2800.38	2800.36	0	6.8	17	NRagged	90.81	90.81	4	3.57	1509	>sp|P02817|AMELX_BOVIN Amelogenin, X isoform OS=Bos taurus OX=9913 GN=AMELX PE=1 SV=2	1	hf1_10472_ebo_36_1_261219.ScanId;v=1;d1=592.592.3	controllerType=0 controllerNumber=1 scan=592	3.3334
40463:4	1	S.MP[+15.995]LPPHPGHPGYINFS[+79.966]YEVLTPLK.W		P[+16], S[+80]	700.85	4	2800.38	2800.36	0	7.4	17	NRagged	103.73	103.73	4	2.64	1509	>sp|P02817|AMELX_BOVIN Amelogenin, X isoform OS=Bos taurus OX=9913 GN=AMELX PE=1 SV=2	1	hf1_10472_ebo_36_1_261219.ScanId;v=1;d1=29308.29308.4	controllerType=0 controllerNumber=1 scan=29308	61.4176
43453:3	1	S.MP[+15.995]LPPHPGHPGYINFS[+79.966]YEVLTPLK.W		P[+16], S[+80]	934.129	3	2800.37	2800.36	0	5.3	17	NRagged	135.58	135.58	4	3.48	1509	>sp|P02817|AMELX_BOVIN Amelogenin, X isoform OS=Bos taurus OX=9913 GN=AMELX PE=1 SV=2	1	hf1_10472_ebo_36_1_261219.ScanId;v=1;d1=31321.31321.3	controllerType=0 controllerNumber=1 scan=31321	65.1953
24527:4	1	S.M[+15.995]PLPPHPGHPGYINF[+15.995]SYEVLTPLK.W		F[+16], M[+16]	684.855	4	2736.4	2736.39	0	4.1	17	NRagged	168.17	168.17	0.9	3.07	1509	>sp|P02817|AMELX_BOVIN Amelogenin, X isoform OS=Bos taurus OX=9913 GN=AMELX PE=1 SV=2	1	hf1_10472_ebo_36_1_261219.ScanId;v=1;d1=19108.19108.4	controllerType=0 controllerNumber=1 scan=19108	43.0197
42656:3	1	S.M[+15.995]PLPPHPGHPGYINFS[+79.966]YEVLTPLK.W		M[+16], S[+80]	934.13	3	2800.38	2800.36	0	7.1	17	NRagged	169.12	169.12	8.64	3.7	1509	>sp|P02817|AMELX_BOVIN Amelogenin, X isoform OS=Bos taurus OX=9913 GN=AMELX PE=1 SV=2	1	hf1_10472_ebo_36_1_261219.ScanId;v=1;d1=30680.30680.3	controllerType=0 controllerNumber=1 scan=30680	63.8756
42401:4	1	S.MP[+15.995]LPPHPGHPGYINFS[+79.966]YEVLTPLK.W		P[+16], S[+80]	700.848	4	2800.37	2800.36	0	4.6	17	NRagged	177.45	177.45	4	3.99	1509	>sp|P02817|AMELX_BOVIN Amelogenin, X isoform OS=Bos taurus OX=9913 GN=AMELX PE=1 SV=2	1	hf1_10472_ebo_36_1_261219.ScanId;v=1;d1=30529.30529.4	controllerType=0 controllerNumber=1 scan=30529	63.6081
43870:3	1	S.MP[+15.995]LPPHPGHPGYINFS[+79.966]YEVLTPLK.W		P[+16], S[+80]	934.126	3	2800.36	2800.36	0	2.3	17	NRagged	187.47	187.47	4	3.99	1509	>sp|P02817|AMELX_BOVIN Amelogenin, X isoform OS=Bos taurus OX=9913 GN=AMELX PE=1 SV=2	1	hf1_10472_ebo_36_1_261219.ScanId;v=1;d1=31838.31838.3	controllerType=0 controllerNumber=1 scan=31838	66.8269
24319:3	1	S.MP[+15.995]LPPHPGHPGYINFS[+79.966]YEVLTPLK.W		P[+16], S[+80]	934.133	3	2800.38	2800.36	0	9.6	17	NRagged	188.14	188.14	4	3.1	1509	>sp|P02817|AMELX_BOVIN Amelogenin, X isoform OS=Bos taurus OX=9913 GN=AMELX PE=1 SV=2	1	hf1_10472_ebo_36_1_261219.ScanId;v=1;d1=18966.18966.3	controllerType=0 controllerNumber=1 scan=18966	42.7713
43662:3	1	S.MP[+15.995]LPPHPGHPGYINFS[+79.966]YEVLTPLK.W		P[+16], S[+80]	934.125	3	2800.36	2800.36	0	1.7	17	NRagged	209.16	209.16	4	4.4	1509	>sp|P02817|AMELX_BOVIN Amelogenin, X isoform OS=Bos taurus OX=9913 GN=AMELX PE=1 SV=2	1	hf1_10472_ebo_36_1_261219.ScanId;v=1;d1=31554.31554.3	controllerType=0 controllerNumber=1 scan=31554	65.8682
42942:3	1	S.M[+15.995]PLPPHPGHPGYINFS[+79.966]YEVLTPLK.W		M[+16], S[+80]	934.126	3	2800.36	2800.36	0	2.4	17	NRagged	215.29	215.29	9.74	3.76	1509	>sp|P02817|AMELX_BOVIN Amelogenin, X isoform OS=Bos taurus OX=9913 GN=AMELX PE=1 SV=2	1	hf1_10472_ebo_36_1_261219.ScanId;v=1;d1=30868.30868.3	controllerType=0 controllerNumber=1 scan=30868	64.2091
42620:3	1	S.M[+15.995]PLPPHPGHPGYINFS[+79.966]YEVLTPLK.W		M[+16], S[+80]	934.126	3	2800.36	2800.36	0	2.2	17	NRagged	219.8	219.8	6.74	3.55	1509	>sp|P02817|AMELX_BOVIN Amelogenin, X isoform OS=Bos taurus OX=9913 GN=AMELX PE=1 SV=2	1	hf1_10472_ebo_36_1_261219.ScanId;v=1;d1=30659.30659.3	controllerType=0 controllerNumber=1 scan=30659	63.8378
25938:3	1	S.M[+15.995]PLPPHPGHPGYINFS[+79.966]YEVLTPLK.W		M[+16], S[+80]	934.127	3	2800.37	2800.36	0	3.7	17	NRagged	264.87	264.87	15.46	5.08	1509	>sp|P02817|AMELX_BOVIN Amelogenin, X isoform OS=Bos taurus OX=9913 GN=AMELX PE=1 SV=2	1	hf1_10472_ebo_36_1_261219.ScanId;v=1;d1=20037.20037.3	controllerType=0 controllerNumber=1 scan=20037	44.6525
38289:3	1	S.MP[+15.995]LPPHPGHPGYINFS[+79.966]YEVLTPLK.W		P[+16], S[+80]	934.125	3	2800.36	2800.36	0	1	17	NRagged	269.24	269.24	4	4.41	1509	>sp|P02817|AMELX_BOVIN Amelogenin, X isoform OS=Bos taurus OX=9913 GN=AMELX PE=1 SV=2	1	hf1_10472_ebo_36_1_261219.ScanId;v=1;d1=27943.27943.3	controllerType=0 controllerNumber=1 scan=27943	58.9679
42076:4	1	S.MP[+15.995]LPPHPGHPGYINFS[+79.966]YEVLTPLK.W		P[+16], S[+80]	700.847	4	2800.37	2800.36	0	3.9	17	NRagged	277.29	277.29	4	5.12	1509	>sp|P02817|AMELX_BOVIN Amelogenin, X isoform OS=Bos taurus OX=9913 GN=AMELX PE=1 SV=2	1	hf1_10472_ebo_36_1_261219.ScanId;v=1;d1=30330.30330.4	controllerType=0 controllerNumber=1 scan=30330	63.2497
43197:3	1	S.MP[+15.995]LPPHPGHPGYINFS[+79.966]YEVLTPLK.W		P[+16], S[+80]	934.131	3	2800.38	2800.36	0	7.9	17	NRagged	294.47	294.47	4	6.07	1509	>sp|P02817|AMELX_BOVIN Amelogenin, X isoform OS=Bos taurus OX=9913 GN=AMELX PE=1 SV=2	1	hf1_10472_ebo_36_1_261219.ScanId;v=1;d1=31076.31076.3	controllerType=0 controllerNumber=1 scan=31076	64.613
40260:3	1	S.MP[+15.995]LPPHPGHPGYINFS[+79.966]YEVLTPLK.W		P[+16], S[+80]	934.13	3	2800.37	2800.36	0	6.1	17	NRagged	301.49	301.49	4	5.77	1509	>sp|P02817|AMELX_BOVIN Amelogenin, X isoform OS=Bos taurus OX=9913 GN=AMELX PE=1 SV=2	1	hf1_10472_ebo_36_1_261219.ScanId;v=1;d1=29183.29183.3	controllerType=0 controllerNumber=1 scan=29183	61.1928
32080:3	1	S.MP[+15.995]LPPHPGHPGYINFS[+79.966]YEVLTPLK.W		P[+16], S[+80]	934.131	3	2800.38	2800.36	0	8.1	17	NRagged	326.7	326.7	4	5.86	1509	>sp|P02817|AMELX_BOVIN Amelogenin, X isoform OS=Bos taurus OX=9913 GN=AMELX PE=1 SV=2	1	hf1_10472_ebo_36_1_261219.ScanId;v=1;d1=23986.23986.3	controllerType=0 controllerNumber=1 scan=23986	51.7579
32996:3	1	S.M[+15.995]PLPPHPGHPGYINFS[+79.966]YEVLTPLK.W		M[+16], S[+80]	934.13	3	2800.38	2800.36	0	6.5	17	NRagged	334.05	334.05	7.69	5.86	1509	>sp|P02817|AMELX_BOVIN Amelogenin, X isoform OS=Bos taurus OX=9913 GN=AMELX PE=1 SV=2	1	hf1_10472_ebo_36_1_261219.ScanId;v=1;d1=24587.24587.3	controllerType=0 controllerNumber=1 scan=24587	52.8698
40575:3	1	S.M[+15.995]PLPPHPGHPGYINFS[+79.966]YEVLTPLK.W		M[+16], S[+80]	934.129	3	2800.37	2800.36	0	5.8	17	NRagged	337.07	337.07	8.73	6.21	1509	>sp|P02817|AMELX_BOVIN Amelogenin, X isoform OS=Bos taurus OX=9913 GN=AMELX PE=1 SV=2	1	hf1_10472_ebo_36_1_261219.ScanId;v=1;d1=29378.29378.3	controllerType=0 controllerNumber=1 scan=29378	61.5443
41351:3	1	S.M[+15.995]PLPPHPGHPGYINFS[+79.966]YEVLTPLK.W		M[+16], S[+80]	934.127	3	2800.37	2800.36	0	3.1	17	NRagged	339.82	339.82	20.17	5.41	1509	>sp|P02817|AMELX_BOVIN Amelogenin, X isoform OS=Bos taurus OX=9913 GN=AMELX PE=1 SV=2	1	hf1_10472_ebo_36_1_261219.ScanId;v=1;d1=29872.29872.3	controllerType=0 controllerNumber=1 scan=29872	62.4294
37273:3	1	S.M[+15.995]PLPPHPGHPGYINFS[+79.966]YEVLTPLK.W		M[+16], S[+80]	934.129	3	2800.37	2800.36	0	5.3	17	NRagged	342.07	342.07	10.92	5.93	1509	>sp|P02817|AMELX_BOVIN Amelogenin, X isoform OS=Bos taurus OX=9913 GN=AMELX PE=1 SV=2	1	hf1_10472_ebo_36_1_261219.ScanId;v=1;d1=27300.27300.3	controllerType=0 controllerNumber=1 scan=27300	57.8089
38090:3	1	S.M[+15.995]PLPPHPGHPGYINFS[+79.966]YEVLTPLK.W		M[+16], S[+80]	934.125	3	2800.36	2800.36	0	1.7	17	NRagged	349.4	349.4	23.98	5.2	1509	>sp|P02817|AMELX_BOVIN Amelogenin, X isoform OS=Bos taurus OX=9913 GN=AMELX PE=1 SV=2	1	hf1_10472_ebo_36_1_261219.ScanId;v=1;d1=27814.27814.6	controllerType=0 controllerNumber=1 scan=27814	58.7319
30177:3	1	S.MP[+15.995]LPPHPGHPGYINFS[+79.966]YEVLTPLK.W		P[+16], S[+80]	934.128	3	2800.37	2800.36	0	4.2	17	NRagged	362.87	362.87	4	6.32	1509	>sp|P02817|AMELX_BOVIN Amelogenin, X isoform OS=Bos taurus OX=9913 GN=AMELX PE=1 SV=2	1	hf1_10472_ebo_36_1_261219.ScanId;v=1;d1=22746.22746.3	controllerType=0 controllerNumber=1 scan=22746	49.5132
31370:3	1	S.M[+15.995]PLPPHPGHPGYINFS[+79.966]YEVLTPLK.W		M[+16], S[+80]	934.127	3	2800.37	2800.36	0	3.2	17	NRagged	368.69	368.69	19.86	6.32	1509	>sp|P02817|AMELX_BOVIN Amelogenin, X isoform OS=Bos taurus OX=9913 GN=AMELX PE=1 SV=2	1	hf1_10472_ebo_36_1_261219.ScanId;v=1;d1=23525.23525.5	controllerType=0 controllerNumber=1 scan=23525	50.917
28502:4	1	S.MP[+15.995]LPPHPGHPGYINFS[+79.966]YEVLTPLK.W		P[+16], S[+80]	700.848	4	2800.37	2800.36	0	5.3	17	NRagged	371.78	371.78	5.8	6.83	1509	>sp|P02817|AMELX_BOVIN Amelogenin, X isoform OS=Bos taurus OX=9913 GN=AMELX PE=1 SV=2	1	hf1_10472_ebo_36_1_261219.ScanId;v=1;d1=21694.21694.6	controllerType=0 controllerNumber=1 scan=21694	47.6222
40316:3	1	S.M[+15.995]PLPPHPGHPGYINFS[+79.966]YEVLTPLK.W		M[+16], S[+80]	934.124	3	2800.36	2800.36	0	-0.3	17	NRagged	398.06	398.06	13.97	6.33	1509	>sp|P02817|AMELX_BOVIN Amelogenin, X isoform OS=Bos taurus OX=9913 GN=AMELX PE=1 SV=2	1	hf1_10472_ebo_36_1_261219.ScanId;v=1;d1=29216.29216.3	controllerType=0 controllerNumber=1 scan=29216	61.2517
29881:3	1	S.M[+15.995]PLPPHPGHPGYINFS[+79.966]YEVLTPLK.W		M[+16], S[+80]	934.127	3	2800.37	2800.36	0	3.5	17	NRagged	400.5	400.5	8.26	6.56	1509	>sp|P02817|AMELX_BOVIN Amelogenin, X isoform OS=Bos taurus OX=9913 GN=AMELX PE=1 SV=2	1	hf1_10472_ebo_36_1_261219.ScanId;v=1;d1=22553.22553.3	controllerType=0 controllerNumber=1 scan=22553	49.1677
28580:4	1	S.MP[+15.995]LPPHPGHPGYINFS[+79.966]YEVLTPLK.W		P[+16], S[+80]	700.846	4	2800.36	2800.36	0	2.4	17	NRagged	412.01	412.01	4	6.38	1509	>sp|P02817|AMELX_BOVIN Amelogenin, X isoform OS=Bos taurus OX=9913 GN=AMELX PE=1 SV=2	1	hf1_10472_ebo_36_1_261219.ScanId;v=1;d1=21743.21743.6	controllerType=0 controllerNumber=1 scan=21743	47.7075
28799:4	1	S.MPLPPHPGHPGYIN[+0.984]FS[+79.966]YEVLTPLK.W		N[+1], S[+80]	697.098	4	2785.37	2785.35	0	8.2	17	NRagged	459.64	459.64	201.4	6.84	1509	>sp|P02817|AMELX_BOVIN Amelogenin, X isoform OS=Bos taurus OX=9913 GN=AMELX PE=1 SV=2	1	hf1_10472_ebo_36_1_261219.ScanId;v=1;d1=21883.21883.6	controllerType=0 controllerNumber=1 scan=21883	47.9594
28193:4	1	S.MP[+15.995]LPPHPGHPGYINFS[+79.966]YEVLTPLK.W		P[+16], S[+80]	700.847	4	2800.37	2800.36	0	3.2	17	NRagged	471.67	471.67	5.8	6.48	1509	>sp|P02817|AMELX_BOVIN Amelogenin, X isoform OS=Bos taurus OX=9913 GN=AMELX PE=1 SV=2	1	hf1_10472_ebo_36_1_261219.ScanId;v=1;d1=21497.21497.6	controllerType=0 controllerNumber=1 scan=21497	47.2735
29539:3	1	S.MP[+15.995]LPPHPGHPGYINFS[+79.966]YEVLTPLK.W		P[+16], S[+80]	934.126	3	2800.36	2800.36	0	2.4	17	NRagged	484.51	484.51	4	6.68	1509	>sp|P02817|AMELX_BOVIN Amelogenin, X isoform OS=Bos taurus OX=9913 GN=AMELX PE=1 SV=2	1	hf1_10472_ebo_36_1_261219.ScanId;v=1;d1=22340.22340.3	controllerType=0 controllerNumber=1 scan=22340	48.7886
41967:3	1	S.M[+15.995]PLPPHPGHPGYINFS[+79.966]YEVLTPLK.W		M[+16], S[+80]	934.131	3	2800.38	2800.36	0	7.9	17	NRagged	495.47	495.47	30.55	7.21	1509	>sp|P02817|AMELX_BOVIN Amelogenin, X isoform OS=Bos taurus OX=9913 GN=AMELX PE=1 SV=2	1	hf1_10472_ebo_36_1_261219.ScanId;v=1;d1=30262.30262.3	controllerType=0 controllerNumber=1 scan=30262	63.1284
26979:4	1	S.MP[+31.990]LPPHPGHPGYINFS[+79.966]YEVLTPLK.W		P[+32], S[+80]	704.848	4	2816.37	2816.35	0	6	17	NRagged	497.52	497.52	1.8	7.04	1509	>sp|P02817|AMELX_BOVIN Amelogenin, X isoform OS=Bos taurus OX=9913 GN=AMELX PE=1 SV=2	1	hf1_10472_ebo_36_1_261219.ScanId;v=1;d1=20728.20728.4	controllerType=0 controllerNumber=1 scan=20728	45.8749
25863:4	1	S.MP[+15.995]LPPHPGHPGYIN[+0.984]FSYEVLTPLK.W		N[+1], P[+16]	681.102	4	2721.38	2721.37	0	3.7	17	NRagged	500.58	462.06	4	7.01	1509	>sp|P02817|AMELX_BOVIN Amelogenin, X isoform OS=Bos taurus OX=9913 GN=AMELX PE=1 SV=2	1	hf1_10472_ebo_36_1_261219.ScanId;v=1;d1=19986.19986.4	controllerType=0 controllerNumber=1 scan=19986	44.5606
30488:3	1	S.M[+15.995]PLPPHPGHPGYINFS[+79.966]YEVLTPLK.W		M[+16], S[+80]	934.131	3	2800.38	2800.36	0	7.3	17	NRagged	504.74	504.74	8.65	7.12	1509	>sp|P02817|AMELX_BOVIN Amelogenin, X isoform OS=Bos taurus OX=9913 GN=AMELX PE=1 SV=2	1	hf1_10472_ebo_36_1_261219.ScanId;v=1;d1=22946.22946.3	controllerType=0 controllerNumber=1 scan=22946	49.8746
27880:4	1	S.MP[+15.995]LPPHPGHPGYINFS[+79.966]YEVLTPLK.W		P[+16], S[+80]	700.847	4	2800.37	2800.36	0	3.4	17	NRagged	510.74	510.74	5.8	6.52	1509	>sp|P02817|AMELX_BOVIN Amelogenin, X isoform OS=Bos taurus OX=9913 GN=AMELX PE=1 SV=2	1	hf1_10472_ebo_36_1_261219.ScanId;v=1;d1=21304.21304.6	controllerType=0 controllerNumber=1 scan=21304	46.9174
45324:4	1	S.MP[+15.995]LPPHPGHPGYINFS[+79.966]YEVLTPLK.W		P[+16], S[+80]	700.851	4	2800.38	2800.36	0	8.7	17	NRagged	523.13	523.13	4	6.45	1509	>sp|P02817|AMELX_BOVIN Amelogenin, X isoform OS=Bos taurus OX=9913 GN=AMELX PE=1 SV=2	1	hf1_10472_ebo_36_1_261219.ScanId;v=1;d1=33714.33714.6	controllerType=0 controllerNumber=1 scan=33714	73.6055
42281:3	1	S.M[+15.995]PLPPHPGHPGYINFS[+79.966]YEVLTPLK.W		M[+16], S[+80]	934.131	3	2800.38	2800.36	0	7.5	17	NRagged	530.79	530.79	10.98	7.34	1509	>sp|P02817|AMELX_BOVIN Amelogenin, X isoform OS=Bos taurus OX=9913 GN=AMELX PE=1 SV=2	1	hf1_10472_ebo_36_1_261219.ScanId;v=1;d1=30458.30458.3	controllerType=0 controllerNumber=1 scan=30458	63.4798
29217:3	1	S.M[+15.995]PLPPHPGHPGYINFS[+79.966]YEVLTPLK.W		M[+16], S[+80]	934.128	3	2800.37	2800.36	0	3.9	17	NRagged	556.38	556.38	6.68	6.9	1509	>sp|P02817|AMELX_BOVIN Amelogenin, X isoform OS=Bos taurus OX=9913 GN=AMELX PE=1 SV=2	1	hf1_10472_ebo_36_1_261219.ScanId;v=1;d1=22142.22142.3	controllerType=0 controllerNumber=1 scan=22142	48.432
25556:3	1	S.M[+15.995]PLPPHPGHPGYINFS[+79.966]YEVLTPLK.W		M[+16], S[+80]	934.128	3	2800.37	2800.36	0	5	17	NRagged	569.23	569.23	8.91	8.21	1509	>sp|P02817|AMELX_BOVIN Amelogenin, X isoform OS=Bos taurus OX=9913 GN=AMELX PE=1 SV=2	1	hf1_10472_ebo_36_1_261219.ScanId;v=1;d1=19782.19782.3	controllerType=0 controllerNumber=1 scan=19782	44.2043
28534:4	1	S.MPLPPHPGHPGYIN[+0.984]FS[+79.966]YEVLTPLK.W		N[+1], S[+80]	697.096	4	2785.36	2785.35	0	6.3	17	NRagged	612.3	612.3	304.4	9.39	1509	>sp|P02817|AMELX_BOVIN Amelogenin, X isoform OS=Bos taurus OX=9913 GN=AMELX PE=1 SV=2	1	hf1_10472_ebo_36_1_261219.ScanId;v=1;d1=21717.21717.4	controllerType=0 controllerNumber=1 scan=21717	47.6627
25565:4	1	S.M[+15.995]PLPPHPGHPGYIN[+0.984]FSYEVLTPLK.W		M[+16], N[+1]	681.103	4	2721.39	2721.37	0	5.6	17	NRagged	613.21	596.38	1.17	9.47	1509	>sp|P02817|AMELX_BOVIN Amelogenin, X isoform OS=Bos taurus OX=9913 GN=AMELX PE=1 SV=2	1	hf1_10472_ebo_36_1_261219.ScanId;v=1;d1=19788.19788.4	controllerType=0 controllerNumber=1 scan=19788	44.2158
28876:3	1	S.M[+15.995]PLPPHPGHPGYINFS[+79.966]YEVLTPLK.W		M[+16], S[+80]	934.131	3	2800.38	2800.36	0	7.7	17	NRagged	613.63	613.63	6.93	9.14	1509	>sp|P02817|AMELX_BOVIN Amelogenin, X isoform OS=Bos taurus OX=9913 GN=AMELX PE=1 SV=2	1	hf1_10472_ebo_36_1_261219.ScanId;v=1;d1=21931.21931.3	controllerType=0 controllerNumber=1 scan=21931	48.0495
30774:3	1	S.M[+15.995]PLPPHPGHPGYINFS[+79.966]YEVLTPLK.W		M[+16], S[+80]	934.128	3	2800.37	2800.36	0	4.3	17	NRagged	619	619	17.59	8.61	1509	>sp|P02817|AMELX_BOVIN Amelogenin, X isoform OS=Bos taurus OX=9913 GN=AMELX PE=1 SV=2	1	hf1_10472_ebo_36_1_261219.ScanId;v=1;d1=23135.23135.4	controllerType=0 controllerNumber=1 scan=23135	50.2173
28572:3	1	S.M[+15.995]PLPPHPGHPGYINFS[+79.966]YEVLTPLK.W		M[+16], S[+80]	934.13	3	2800.38	2800.36	0	6.6	17	NRagged	651.13	651.13	28.16	10.63	1509	>sp|P02817|AMELX_BOVIN Amelogenin, X isoform OS=Bos taurus OX=9913 GN=AMELX PE=1 SV=2	1	hf1_10472_ebo_36_1_261219.ScanId;v=1;d1=21739.21739.3	controllerType=0 controllerNumber=1 scan=21739	47.7015
27577:4	1	S.MP[+15.995]LPPHPGHPGYINFS[+79.966]YEVLTPLK.W		P[+16], S[+80]	700.846	4	2800.36	2800.36	0	1.2	17	NRagged	680.28	680.28	5.8	9.73	1509	>sp|P02817|AMELX_BOVIN Amelogenin, X isoform OS=Bos taurus OX=9913 GN=AMELX PE=1 SV=2	1	hf1_10472_ebo_36_1_261219.ScanId;v=1;d1=21111.21111.6	controllerType=0 controllerNumber=1 scan=21111	46.5646
26637:3	1	S.M[+31.990]PLPPHPGHPGYINFS[+79.966]YEVLTPLK.W		M[+32], S[+80]	939.46	3	2816.37	2816.35	0	5.2	17	NRagged	687.06	687.06	0	10.71	1509	>sp|P02817|AMELX_BOVIN Amelogenin, X isoform OS=Bos taurus OX=9913 GN=AMELX PE=1 SV=2	1	hf1_10472_ebo_36_1_261219.ScanId;v=1;d1=20506.20506.3	controllerType=0 controllerNumber=1 scan=20506	45.4839
28264:3	1	S.M[+15.995]PLPPHPGHPGYINFS[+79.966]YEVLTPLK.W		M[+16], S[+80]	934.128	3	2800.37	2800.36	0	4.2	17	NRagged	696.6	696.6	8.55	10.18	1509	>sp|P02817|AMELX_BOVIN Amelogenin, X isoform OS=Bos taurus OX=9913 GN=AMELX PE=1 SV=2	1	hf1_10472_ebo_36_1_261219.ScanId;v=1;d1=21540.21540.3	controllerType=0 controllerNumber=1 scan=21540	47.35
26369:2	1	S.M[+15.995]PLPPHPGHPGYINFS[+79.966]YEVLTPLK.W		M[+16], S[+80]	1400.69	2	2800.37	2800.36	0	5.7	17	NRagged	697.32	697.32	25.48	10.02	1509	>sp|P02817|AMELX_BOVIN Amelogenin, X isoform OS=Bos taurus OX=9913 GN=AMELX PE=1 SV=2	1	hf1_10472_ebo_36_1_261219.ScanId;v=1;d1=20330.20330.2	controllerType=0 controllerNumber=1 scan=20330	45.177
26600:4	1	S.MP[+15.995]LPPHPGHPGYINFS[+79.966]YEVLTPLK.W		P[+16], S[+80]	700.848	4	2800.37	2800.36	0	5.3	17	NRagged	723	723	4	11.47	1509	>sp|P02817|AMELX_BOVIN Amelogenin, X isoform OS=Bos taurus OX=9913 GN=AMELX PE=1 SV=2	1	hf1_10472_ebo_36_1_261219.ScanId;v=1;d1=20483.20483.4	controllerType=0 controllerNumber=1 scan=20483	45.4443
26306:4	1	S.MP[+15.995]LPPHPGHPGYINFS[+79.966]YEVLTPLK.W		P[+16], S[+80]	700.849	4	2800.37	2800.36	0	5.9	17	NRagged	742.3	742.3	4	11.47	1509	>sp|P02817|AMELX_BOVIN Amelogenin, X isoform OS=Bos taurus OX=9913 GN=AMELX PE=1 SV=2	1	hf1_10472_ebo_36_1_261219.ScanId;v=1;d1=20288.20288.4	controllerType=0 controllerNumber=1 scan=20288	45.1009
26019:4	1	S.MP[+15.995]LPPHPGHPGYINFS[+79.966]YEVLTPLK.W		P[+16], S[+80]	700.847	4	2800.37	2800.36	0	4	17	NRagged	755.9	755.9	4	11.94	1509	>sp|P02817|AMELX_BOVIN Amelogenin, X isoform OS=Bos taurus OX=9913 GN=AMELX PE=1 SV=2	1	hf1_10472_ebo_36_1_261219.ScanId;v=1;d1=20093.20093.4	controllerType=0 controllerNumber=1 scan=20093	44.7531
26081:2	1	S.M[+15.995]PLPPHPGHPGYINFS[+79.966]YEVLTPLK.W		M[+16], S[+80]	1400.69	2	2800.37	2800.36	0	6.3	17	NRagged	762.85	762.85	52.55	11.95	1509	>sp|P02817|AMELX_BOVIN Amelogenin, X isoform OS=Bos taurus OX=9913 GN=AMELX PE=1 SV=2	1	hf1_10472_ebo_36_1_261219.ScanId;v=1;d1=20136.20136.2	controllerType=0 controllerNumber=1 scan=20136	44.8302
27946:3	1	S.M[+15.995]PLPPHPGHPGYINFS[+79.966]YEVLTPLK.W		M[+16], S[+80]	934.126	3	2800.36	2800.36	0	2.5	17	NRagged	820.19	820.19	20.63	13.18	1509	>sp|P02817|AMELX_BOVIN Amelogenin, X isoform OS=Bos taurus OX=9913 GN=AMELX PE=1 SV=2	1	hf1_10472_ebo_36_1_261219.ScanId;v=1;d1=21345.21345.3	controllerType=0 controllerNumber=1 scan=21345	46.9938
27347:3	1	S.M[+15.995]PLPPHPGHPGYINFS[+79.966]YEVLTPLK.W		M[+16], S[+80]	934.126	3	2800.36	2800.36	0	2.3	17	NRagged	866.05	866.05	46.03	14.18	1509	>sp|P02817|AMELX_BOVIN Amelogenin, X isoform OS=Bos taurus OX=9913 GN=AMELX PE=1 SV=2	1	hf1_10472_ebo_36_1_261219.ScanId;v=1;d1=20968.20968.3	controllerType=0 controllerNumber=1 scan=20968	46.3039
27642:3	1	S.M[+15.995]PLPPHPGHPGYINFS[+79.966]YEVLTPLK.W		M[+16], S[+80]	934.125	3	2800.36	2800.36	0	1.4	17	NRagged	894.34	894.34	20	13.97	1509	>sp|P02817|AMELX_BOVIN Amelogenin, X isoform OS=Bos taurus OX=9913 GN=AMELX PE=1 SV=2	1	hf1_10472_ebo_36_1_261219.ScanId;v=1;d1=21154.21154.3	controllerType=0 controllerNumber=1 scan=21154	46.6444
28723:3	1	S.MPLPPHPGHPGYIN[+0.984]FS[+79.966]YEVLTPLK.W		N[+1], S[+80]	929.126	3	2785.36	2785.35	0	6.4	17	NRagged	915.24	915.24	425.75	15.63	1509	>sp|P02817|AMELX_BOVIN Amelogenin, X isoform OS=Bos taurus OX=9913 GN=AMELX PE=1 SV=2	1	hf1_10472_ebo_36_1_261219.ScanId;v=1;d1=21835.21835.3	controllerType=0 controllerNumber=1 scan=21835	47.8752
45257:3	1	S.M[+15.995]PLPPHPGHPGYINFS[+79.966]YEVLTPLK.W		M[+16], S[+80]	934.131	3	2800.38	2800.36	0	7.5	17	NRagged	1076.59	1076.59	56.65	18.63	1509	>sp|P02817|AMELX_BOVIN Amelogenin, X isoform OS=Bos taurus OX=9913 GN=AMELX PE=1 SV=2	1	hf1_10472_ebo_36_1_261219.ScanId;v=1;d1=33669.33669.3	controllerType=0 controllerNumber=1 scan=33669	73.5249
26431:3	1	S.M[+15.995]PLPPHPGHPGYINFS[+79.966]YEVLTPLK.W		M[+16], S[+80]	934.129	3	2800.37	2800.36	0	5.9	17	NRagged	1093.14	1093.14	46.75	18.71	1509	>sp|P02817|AMELX_BOVIN Amelogenin, X isoform OS=Bos taurus OX=9913 GN=AMELX PE=1 SV=2	1	hf1_10472_ebo_36_1_261219.ScanId;v=1;d1=20373.20373.3	controllerType=0 controllerNumber=1 scan=20373	45.2529
25859:3	1	S.M[+15.995]PLPPHPGHPGYINFS[+79.966]YEVLTPLK.W		M[+16], S[+80]	934.127	3	2800.37	2800.36	0	3.3	17	NRagged	1095.05	1095.05	63.34	18.18	1509	>sp|P02817|AMELX_BOVIN Amelogenin, X isoform OS=Bos taurus OX=9913 GN=AMELX PE=1 SV=2	1	hf1_10472_ebo_36_1_261219.ScanId;v=1;d1=19983.19983.3	controllerType=0 controllerNumber=1 scan=19983	44.5569
28415:3	1	S.MPLPPHPGHPGYIN[+0.984]FS[+79.966]YEVLTPLK.W		N[+1], S[+80]	929.124	3	2785.36	2785.35	0	4.3	17	NRagged	1095.88	1095.88	498.39	18.71	1509	>sp|P02817|AMELX_BOVIN Amelogenin, X isoform OS=Bos taurus OX=9913 GN=AMELX PE=1 SV=2	1	hf1_10472_ebo_36_1_261219.ScanId;v=1;d1=21639.21639.3	controllerType=0 controllerNumber=1 scan=21639	47.525
26148:3	1	S.M[+15.995]PLPPHPGHPGYINFS[+79.966]YEVLTPLK.W		M[+16], S[+80]	934.128	3	2800.37	2800.36	0	4.9	17	NRagged	1109	1109	57.69	19.71	1509	>sp|P02817|AMELX_BOVIN Amelogenin, X isoform OS=Bos taurus OX=9913 GN=AMELX PE=1 SV=2	1	hf1_10472_ebo_36_1_261219.ScanId;v=1;d1=20178.20178.3	controllerType=0 controllerNumber=1 scan=20178	44.9029
44078:3	1	S.MP[+15.995]LPPHPGHPGYIN[+0.984]FS[+79.966]YEVLTPLK.W		N[+1], P[+16], S[+80]	934.459	3	2801.36	2801.34	0	7.7	17	NRagged	2.72	2.72	2.72	2.56	1509	>sp|P02817|AMELX_BOVIN Amelogenin, X isoform OS=Bos taurus OX=9913 GN=AMELX PE=1 SV=2	1	hf1_10472_ebo_36_1_261219.ScanId;v=1;d1=32150.32150.3	controllerType=0 controllerNumber=1 scan=32150	67.9834
43929:3	1	S.MP[+15.995]LPPHPGHPGYIN[+0.984]FS[+79.966]YEVLTPLK.W		N[+1], P[+16], S[+80]	934.461	3	2801.37	2801.34	0	9.9	17	NRagged	14.78	14.78	4	2.39	1509	>sp|P02817|AMELX_BOVIN Amelogenin, X isoform OS=Bos taurus OX=9913 GN=AMELX PE=1 SV=2	1	hf1_10472_ebo_36_1_261219.ScanId;v=1;d1=31929.31929.3	controllerType=0 controllerNumber=1 scan=31929	67.1656
43766:3	1	S.MP[+15.995]LPPHPGHPGYIN[+0.984]FS[+79.966]YEVLTPLK.W		N[+1], P[+16], S[+80]	934.459	3	2801.36	2801.34	0	7.8	17	NRagged	75.46	75.46	4	2.87	1509	>sp|P02817|AMELX_BOVIN Amelogenin, X isoform OS=Bos taurus OX=9913 GN=AMELX PE=1 SV=2	1	hf1_10472_ebo_36_1_261219.ScanId;v=1;d1=31697.31697.3	controllerType=0 controllerNumber=1 scan=31697	66.3537
44067:3	1	S.MP[+15.995]LPPHPGHPGYIN[+0.984]FS[+79.966]YEVLTPLK.W		N[+1], P[+16], S[+80]	934.46	3	2801.37	2801.34	0	8.9	17	NRagged	92.99	92.99	4	2.53	1509	>sp|P02817|AMELX_BOVIN Amelogenin, X isoform OS=Bos taurus OX=9913 GN=AMELX PE=1 SV=2	1	hf1_10472_ebo_36_1_261219.ScanId;v=1;d1=32132.32132.3	controllerType=0 controllerNumber=1 scan=32132	67.9162
24632:4	1	S.MP[+15.995]LPPHPGHPGYINFS[+79.966]Y[+15.995]EVLTPLK.W		P[+16], S[+80], Y[+16]	704.846	4	2816.36	2816.35	0	4	17	NRagged	102.29	102.29	5.8	2.21	1509	>sp|P02817|AMELX_BOVIN Amelogenin, X isoform OS=Bos taurus OX=9913 GN=AMELX PE=1 SV=2	1	hf1_10472_ebo_36_1_261219.ScanId;v=1;d1=19179.19179.6	controllerType=0 controllerNumber=1 scan=19179	43.1459
43405:3	1	S.M[+15.995]PLPPHPGHPGYIN[+0.984]FS[+79.966]YEVLTPLK.W		M[+16], N[+1], S[+80]	934.46	3	2801.37	2801.34	0	9.2	17	NRagged	120.92	120.92	6.52	2.64	1509	>sp|P02817|AMELX_BOVIN Amelogenin, X isoform OS=Bos taurus OX=9913 GN=AMELX PE=1 SV=2	1	hf1_10472_ebo_36_1_261219.ScanId;v=1;d1=31272.31272.3	controllerType=0 controllerNumber=1 scan=31272	65.0709
24943:4	1	S.MP[+15.995]LPPHPGHPGYINFS[+79.966]Y[+15.995]EVLTPLK.W		P[+16], S[+80], Y[+16]	704.846	4	2816.36	2816.35	0	3	17	NRagged	134.72	134.72	0	2.39	1509	>sp|P02817|AMELX_BOVIN Amelogenin, X isoform OS=Bos taurus OX=9913 GN=AMELX PE=1 SV=2	1	hf1_10472_ebo_36_1_261219.ScanId;v=1;d1=19380.19380.4	controllerType=0 controllerNumber=1 scan=19380	43.4951
22465:3	1	S.M[+15.995]PLPPHPGHPGY[+15.995]INFS[+79.966]YEVLTPLK.W		M[+16], S[+80], Y[+16]	939.46	3	2816.36	2816.35	0	4.4	17	NRagged	172.47	172.47	0	3.78	1509	>sp|P02817|AMELX_BOVIN Amelogenin, X isoform OS=Bos taurus OX=9913 GN=AMELX PE=1 SV=2	1	hf1_10472_ebo_36_1_261219.ScanId;v=1;d1=17752.17752.3	controllerType=0 controllerNumber=1 scan=17752	40.6295
26234:4	1	S.MP[+15.995]LPPHP[+31.990]GHPGYINF[+31.990]SYEVLTPLK.W		F[+32], P[+16][+32]	696.842	4	2784.35	2784.37	0	-9	17	NRagged	204.82	204.82	3.86	2.62	1509	>sp|P02817|AMELX_BOVIN Amelogenin, X isoform OS=Bos taurus OX=9913 GN=AMELX PE=1 SV=2	1	hf1_10472_ebo_36_1_261219.ScanId;v=1;d1=20238.20238.4	controllerType=0 controllerNumber=1 scan=20238	45.009
43559:3	1	S.M[+15.995]PLPPHPGHPGYIN[+0.984]FS[+79.966]YEVLTPLK.W		M[+16], N[+1], S[+80]	934.458	3	2801.36	2801.34	0	6.6	17	NRagged	209.17	209.17	29.07	4.56	1509	>sp|P02817|AMELX_BOVIN Amelogenin, X isoform OS=Bos taurus OX=9913 GN=AMELX PE=1 SV=2	1	hf1_10472_ebo_36_1_261219.ScanId;v=1;d1=31440.31440.3	controllerType=0 controllerNumber=1 scan=31440	65.5313
24880:4	1	S.MP[+15.995]LPPHPGHPGYINFS[+79.966]Y[+15.995]EVLTPLK.W		P[+16], S[+80], Y[+16]	704.847	4	2816.37	2816.35	0	5.6	17	NRagged	291.3	291.3	16.4	5.54	1509	>sp|P02817|AMELX_BOVIN Amelogenin, X isoform OS=Bos taurus OX=9913 GN=AMELX PE=1 SV=2	1	hf1_10472_ebo_36_1_261219.ScanId;v=1;d1=19338.19338.4	controllerType=0 controllerNumber=1 scan=19338	43.421
29017:3	1	S.M[+15.995]PLPPHP[+15.995]GHPGYINFS[+79.966]YEVLTPLK.W		M[+16], P[+16], S[+80]	939.461	3	2816.37	2816.35	0	6.2	17	NRagged	354.13	354.13	8.39	5.93	1509	>sp|P02817|AMELX_BOVIN Amelogenin, X isoform OS=Bos taurus OX=9913 GN=AMELX PE=1 SV=2	1	hf1_10472_ebo_36_1_261219.ScanId;v=1;d1=22019.22019.3	controllerType=0 controllerNumber=1 scan=22019	48.2084
26468:4	1	S.MP[+31.990]LPPHPGHPGYIN[+0.984]FS[+79.966]YEVLTPLK.W		N[+1], P[+32], S[+80]	705.096	4	2817.36	2817.34	0	9.1	17	NRagged	362.81	360.45	9.11	5.88	1509	>sp|P02817|AMELX_BOVIN Amelogenin, X isoform OS=Bos taurus OX=9913 GN=AMELX PE=1 SV=2	1	hf1_10472_ebo_36_1_261219.ScanId;v=1;d1=20396.20396.4	controllerType=0 controllerNumber=1 scan=20396	45.2924
25072:3	1	S.M[+15.995]PLPPHPGHP[+15.995]GYINFS[+79.966]YEVLTPLK.W		M[+16], P[+16], S[+80]	939.46	3	2816.37	2816.35	0	5.3	17	NRagged	421.26	421.26	1.17	6.86	1509	>sp|P02817|AMELX_BOVIN Amelogenin, X isoform OS=Bos taurus OX=9913 GN=AMELX PE=1 SV=2	1	hf1_10472_ebo_36_1_261219.ScanId;v=1;d1=19464.19464.3	controllerType=0 controllerNumber=1 scan=19464	43.6464
30783:3	1	S.M[+15.995]PLPPHPGHPGYIN[+0.984]FS[+79.966]YEVLTPLK.W		M[+16], N[+1], S[+80]	934.46	3	2801.36	2801.34	0	8.4	17	NRagged	431.56	431.56	11.38	6.41	1509	>sp|P02817|AMELX_BOVIN Amelogenin, X isoform OS=Bos taurus OX=9913 GN=AMELX PE=1 SV=2	1	hf1_10472_ebo_36_1_261219.ScanId;v=1;d1=23141.23141.3	controllerType=0 controllerNumber=1 scan=23141	50.2293
26179:4	1	S.MP[+31.990]LPPHPGHPGYIN[+0.984]FS[+79.966]YEVLTPLK.W		N[+1], P[+32], S[+80]	705.094	4	2817.36	2817.34	0	7.1	17	NRagged	443.2	394.56	8.53	6.84	1509	>sp|P02817|AMELX_BOVIN Amelogenin, X isoform OS=Bos taurus OX=9913 GN=AMELX PE=1 SV=2	1	hf1_10472_ebo_36_1_261219.ScanId;v=1;d1=20199.20199.4	controllerType=0 controllerNumber=1 scan=20199	44.9394
45288:4	1	S.MP[+15.995]LPPHPGHPGY[+15.995]INFS[+79.966]YEVLTPLK.W		P[+16], S[+80], Y[+16]	704.85	4	2816.38	2816.35	0	10	17	NRagged	454.6	454.6	7.39	6.19	1509	>sp|P02817|AMELX_BOVIN Amelogenin, X isoform OS=Bos taurus OX=9913 GN=AMELX PE=1 SV=2	1	hf1_10472_ebo_36_1_261219.ScanId;v=1;d1=33691.33691.4	controllerType=0 controllerNumber=1 scan=33691	73.5639
28510:3	1	S.M[+15.995]PLPPHP[+15.995]GHPGYINFS[+79.966]YEVLTPLK.W		M[+16], P[+16], S[+80]	939.459	3	2816.36	2816.35	0	4.1	17	NRagged	463.13	463.13	5.89	6.72	1509	>sp|P02817|AMELX_BOVIN Amelogenin, X isoform OS=Bos taurus OX=9913 GN=AMELX PE=1 SV=2	1	hf1_10472_ebo_36_1_261219.ScanId;v=1;d1=21698.21698.3	controllerType=0 controllerNumber=1 scan=21698	47.6283
26467:4	1	S.M[+15.995]PLP[+15.995]PHPGHPGYINFS[+79.966]YEVLTPLK.W		M[+16], P[+16], S[+80]	704.846	4	2816.36	2816.35	0	3.2	17	NRagged	476.93	476.93	5.71	6.4	1509	>sp|P02817|AMELX_BOVIN Amelogenin, X isoform OS=Bos taurus OX=9913 GN=AMELX PE=1 SV=2	1	hf1_10472_ebo_36_1_261219.ScanId;v=1;d1=20396.20396.4	controllerType=0 controllerNumber=1 scan=20396	45.2924
25286:4	1	S.M[+15.995]PLPPHPGHPGY[+15.995]INFS[+79.966]YEVLTPLK.W		M[+16], S[+80], Y[+16]	704.847	4	2816.37	2816.35	0	4.9	17	NRagged	565.21	565.21	2.6	8.47	1509	>sp|P02817|AMELX_BOVIN Amelogenin, X isoform OS=Bos taurus OX=9913 GN=AMELX PE=1 SV=2	1	hf1_10472_ebo_36_1_261219.ScanId;v=1;d1=19607.19607.4	controllerType=0 controllerNumber=1 scan=19607	43.899
23057:3	1	S.M[+15.995]PLPPHPGHPGYINFS[+79.966]YEVLTP[+15.995]LK.W		M[+16], P[+16], S[+80]	939.459	3	2816.36	2816.35	0	3.7	17	NRagged	595.82	595.82	6.94	8.18	1509	>sp|P02817|AMELX_BOVIN Amelogenin, X isoform OS=Bos taurus OX=9913 GN=AMELX PE=1 SV=2	1	hf1_10472_ebo_36_1_261219.ScanId;v=1;d1=18141.18141.3	controllerType=0 controllerNumber=1 scan=18141	41.3217
26638:3	1	S.M[+31.990]PLPPHPGHPGYIN[+0.984]FS[+79.966]YEVLTPLK.W		M[+32], N[+1], S[+80]	939.792	3	2817.36	2817.34	0	9	17	NRagged	607.99	607.99	0	8.49	1509	>sp|P02817|AMELX_BOVIN Amelogenin, X isoform OS=Bos taurus OX=9913 GN=AMELX PE=1 SV=2	1	hf1_10472_ebo_36_1_261219.ScanId;v=1;d1=20506.20506.3	controllerType=0 controllerNumber=1 scan=20506	45.4839
25891:4	1	S.M[+15.995]PLPPHPGH[+15.995]PGYINFS[+79.966]YEVLTPLK.W		H[+16], M[+16], S[+80]	704.845	4	2816.36	2816.35	0	2.8	17	NRagged	608.84	608.84	2.97	8.94	1509	>sp|P02817|AMELX_BOVIN Amelogenin, X isoform OS=Bos taurus OX=9913 GN=AMELX PE=1 SV=2	1	hf1_10472_ebo_36_1_261219.ScanId;v=1;d1=20005.20005.4	controllerType=0 controllerNumber=1 scan=20005	44.5941
26178:4	1	S.M[+15.995]PLPPH[+15.995]PGHPGYINFS[+79.966]YEVLTPLK.W		H[+16], M[+16], S[+80]	704.845	4	2816.36	2816.35	0	1.7	17	NRagged	610.16	610.16	2.38	8.73	1509	>sp|P02817|AMELX_BOVIN Amelogenin, X isoform OS=Bos taurus OX=9913 GN=AMELX PE=1 SV=2	1	hf1_10472_ebo_36_1_261219.ScanId;v=1;d1=20199.20199.4	controllerType=0 controllerNumber=1 scan=20199	44.9394
25730:4	1	S.MP[+15.995]LPPHPGHPGYIN[+0.984]FS[+79.966]YEVLTPLK.W		N[+1], P[+16], S[+80]	701.095	4	2801.36	2801.34	0	6.2	17	NRagged	660.66	635.69	4	10.47	1509	>sp|P02817|AMELX_BOVIN Amelogenin, X isoform OS=Bos taurus OX=9913 GN=AMELX PE=1 SV=2	1	hf1_10472_ebo_36_1_261219.ScanId;v=1;d1=19898.19898.4	controllerType=0 controllerNumber=1 scan=19898	44.4088
25592:4	1	S.MP[+15.995]LPPHPGHPGY[+15.995]INFS[+79.966]YEVLTPLK.W		P[+16], S[+80], Y[+16]	704.847	4	2816.37	2816.35	0	5	17	NRagged	704.6	704.6	3.8	11.47	1509	>sp|P02817|AMELX_BOVIN Amelogenin, X isoform OS=Bos taurus OX=9913 GN=AMELX PE=1 SV=2	1	hf1_10472_ebo_36_1_261219.ScanId;v=1;d1=19809.19809.4	controllerType=0 controllerNumber=1 scan=19809	44.2524
26335:3	1	S.M[+15.995]PLPPH[+15.995]PGHPGYINFS[+79.966]YEVLTPLK.W		H[+16], M[+16], S[+80]	939.457	3	2816.36	2816.35	0	2	17	NRagged	713.4	713.4	6.88	10.97	1509	>sp|P02817|AMELX_BOVIN Amelogenin, X isoform OS=Bos taurus OX=9913 GN=AMELX PE=1 SV=2	1	hf1_10472_ebo_36_1_261219.ScanId;v=1;d1=20307.20307.3	controllerType=0 controllerNumber=1 scan=20307	45.1341
26898:4	1	S.MP[+15.995]LPPHPGHPGYIN[+0.984]FS[+79.966]YEVLTPLK.W		N[+1], P[+16], S[+80]	701.095	4	2801.36	2801.34	0	6.6	17	NRagged	720.54	718.83	4	11.39	1509	>sp|P02817|AMELX_BOVIN Amelogenin, X isoform OS=Bos taurus OX=9913 GN=AMELX PE=1 SV=2	1	hf1_10472_ebo_36_1_261219.ScanId;v=1;d1=20675.20675.4	controllerType=0 controllerNumber=1 scan=20675	45.7815
28809:3	1	S.M[+15.995]PLPPHPGH[+15.995]PGYINFS[+79.966]YEVLTPLK.W		H[+16], M[+16], S[+80]	939.461	3	2816.37	2816.35	0	6.2	17	NRagged	743.07	743.07	0.48	11.71	1509	>sp|P02817|AMELX_BOVIN Amelogenin, X isoform OS=Bos taurus OX=9913 GN=AMELX PE=1 SV=2	1	hf1_10472_ebo_36_1_261219.ScanId;v=1;d1=21889.21889.3	controllerType=0 controllerNumber=1 scan=21889	47.9714
27194:4	1	S.MP[+15.995]LPPHPGHPGYIN[+0.984]FS[+79.966]YEVLTPLK.W		N[+1], P[+16], S[+80]	701.096	4	2801.36	2801.34	0	7.3	17	NRagged	745.69	713.53	5.8	11.39	1509	>sp|P02817|AMELX_BOVIN Amelogenin, X isoform OS=Bos taurus OX=9913 GN=AMELX PE=1 SV=2	1	hf1_10472_ebo_36_1_261219.ScanId;v=1;d1=20865.20865.4	controllerType=0 controllerNumber=1 scan=20865	46.12
45280:3	1	S.M[+15.995]PLPPHPGH[+15.995]PGYINFS[+79.966]YEVLTPLK.W		H[+16], M[+16], S[+80]	939.465	3	2816.38	2816.35	0	9.8	17	NRagged	747.16	747.16	0	10.98	1509	>sp|P02817|AMELX_BOVIN Amelogenin, X isoform OS=Bos taurus OX=9913 GN=AMELX PE=1 SV=2	1	hf1_10472_ebo_36_1_261219.ScanId;v=1;d1=33684.33684.3	controllerType=0 controllerNumber=1 scan=33684	73.5503
26958:3	1	S.M[+15.995]P[+15.995]LPPHPGHPGYINFS[+79.966]YEVLTPLK.W		M[+16], P[+16], S[+80]	939.46	3	2816.37	2816.35	0	5.2	17	NRagged	772.91	772.91	1.73	12.71	1509	>sp|P02817|AMELX_BOVIN Amelogenin, X isoform OS=Bos taurus OX=9913 GN=AMELX PE=1 SV=2	1	hf1_10472_ebo_36_1_261219.ScanId;v=1;d1=20714.20714.3	controllerType=0 controllerNumber=1 scan=20714	45.8509
26026:3	1	S.M[+15.995]PLPPH[+15.995]PGHPGYINFS[+79.966]YEVLTPLK.W		H[+16], M[+16], S[+80]	939.458	3	2816.36	2816.35	0	2.4	17	NRagged	819.32	819.32	10.28	13.18	1509	>sp|P02817|AMELX_BOVIN Amelogenin, X isoform OS=Bos taurus OX=9913 GN=AMELX PE=1 SV=2	1	hf1_10472_ebo_36_1_261219.ScanId;v=1;d1=20097.20097.3	controllerType=0 controllerNumber=1 scan=20097	44.7589
25721:3	1	S.M[+15.995]PLPPH[+15.995]PGHPGYINFS[+79.966]YEVLTPLK.W		H[+16], M[+16], S[+80]	939.461	3	2816.37	2816.35	0	5.4	17	NRagged	869.7	869.7	2.36	14.71	1509	>sp|P02817|AMELX_BOVIN Amelogenin, X isoform OS=Bos taurus OX=9913 GN=AMELX PE=1 SV=2	1	hf1_10472_ebo_36_1_261219.ScanId;v=1;d1=19891.19891.3	controllerType=0 controllerNumber=1 scan=19891	44.3966
25415:3	1	S.M[+15.995]PLPPHPGHPGY[+15.995]INFS[+79.966]YEVLTPLK.W		M[+16], S[+80], Y[+16]	939.46	3	2816.37	2816.35	0	4.8	17	NRagged	892.94	892.94	0	14.71	1509	>sp|P02817|AMELX_BOVIN Amelogenin, X isoform OS=Bos taurus OX=9913 GN=AMELX PE=1 SV=2	1	hf1_10472_ebo_36_1_261219.ScanId;v=1;d1=19692.19692.3	controllerType=0 controllerNumber=1 scan=19692	44.0474
27348:3	1	S.M[+15.995]PLPPHPGHPGYIN[+0.984]FS[+79.966]YEVLTPLK.W		M[+16], N[+1], S[+80]	934.459	3	2801.36	2801.34	0	7.5	17	NRagged	1010.86	981.81	37.23	17.63	1509	>sp|P02817|AMELX_BOVIN Amelogenin, X isoform OS=Bos taurus OX=9913 GN=AMELX PE=1 SV=2	1	hf1_10472_ebo_36_1_261219.ScanId;v=1;d1=20968.20968.3	controllerType=0 controllerNumber=1 scan=20968	46.3039
26742:3	1	S.M[+15.995]PLPPHPGHPGYIN[+0.984]FS[+79.966]YEVLTPLK.W		M[+16], N[+1], S[+80]	934.458	3	2801.36	2801.34	0	6.9	17	NRagged	1060.59	1049.67	58.04	18.63	1509	>sp|P02817|AMELX_BOVIN Amelogenin, X isoform OS=Bos taurus OX=9913 GN=AMELX PE=1 SV=2	1	hf1_10472_ebo_36_1_261219.ScanId;v=1;d1=20576.20576.3	controllerType=0 controllerNumber=1 scan=20576	45.6084
27050:3	1	S.M[+15.995]PLPPHPGHPGYIN[+0.984]FS[+79.966]YEVLTPLK.W		M[+16], N[+1], S[+80]	934.459	3	2801.36	2801.34	0	7.3	17	NRagged	1126.19	1110.54	59.76	19.63	1509	>sp|P02817|AMELX_BOVIN Amelogenin, X isoform OS=Bos taurus OX=9913 GN=AMELX PE=1 SV=2	1	hf1_10472_ebo_36_1_261219.ScanId;v=1;d1=20773.20773.3	controllerType=0 controllerNumber=1 scan=20773	45.9567
45447:3	1	S.MP[+15.995]LPPHPGHP[+31.990]GYINF[+31.990]SY[+15.995]EVLTPLK.W		F[+32], P[+16][+32], Y[+16]	934.127	3	2800.37	2800.37	0	0.7	17	NRagged	5.56	5.56	0	2.39	1509	>sp|P02817|AMELX_BOVIN Amelogenin, X isoform OS=Bos taurus OX=9913 GN=AMELX PE=1 SV=2	1	hf1_10472_ebo_36_1_261219.ScanId;v=1;d1=34229.34229.3	controllerType=0 controllerNumber=1 scan=34229	76.421
43547:4	1	S.MP[+15.995]LPPHPGHP[+15.995]GY[+31.990]INF[+31.990]SYEVLTPLK.W		F[+32], P[+16]*2, Y[+32]	700.847	4	2800.37	2800.37	0	0.4	17	NRagged	37.84	37.84	0	2.26	1509	>sp|P02817|AMELX_BOVIN Amelogenin, X isoform OS=Bos taurus OX=9913 GN=AMELX PE=1 SV=2	1	hf1_10472_ebo_36_1_261219.ScanId;v=1;d1=31421.31421.4	controllerType=0 controllerNumber=1 scan=31421	65.4697
43274:4	1	S.MP[+15.995]LP[+15.995]PHPGHPGY[+31.990]INF[+31.990]SYEVLTPLK.W		F[+32], P[+16]*2, Y[+32]	700.847	4	2800.37	2800.37	0	0.8	17	NRagged	57.71	57.71	0	2.3	1509	>sp|P02817|AMELX_BOVIN Amelogenin, X isoform OS=Bos taurus OX=9913 GN=AMELX PE=1 SV=2	1	hf1_10472_ebo_36_1_261219.ScanId;v=1;d1=31139.31139.4	controllerType=0 controllerNumber=1 scan=31139	64.7373
45530:3	1	S.MP[+15.995]LPPHPGHP[+31.990]GYINF[+31.990]SY[+15.995]EVLTPLK.W		F[+32], P[+16][+32], Y[+16]	934.129	3	2800.37	2800.37	0	2.1	17	NRagged	68.63	68.63	0	2.48	1509	>sp|P02817|AMELX_BOVIN Amelogenin, X isoform OS=Bos taurus OX=9913 GN=AMELX PE=1 SV=2	1	hf1_10472_ebo_36_1_261219.ScanId;v=1;d1=34488.34488.3	controllerType=0 controllerNumber=1 scan=34488	77.78
37547:4	1	S.MP[+15.995]LP[+15.995]P[+31.990]HP[+31.990]GHPGYINFSYEVLTPLK.W		P[+16]*2[+32]*2	700.848	4	2800.37	2800.37	0	2.3	17	NRagged	78.53	78.53	0	2.26	1509	>sp|P02817|AMELX_BOVIN Amelogenin, X isoform OS=Bos taurus OX=9913 GN=AMELX PE=1 SV=2	1	hf1_10472_ebo_36_1_261219.ScanId;v=1;d1=27467.27467.4	controllerType=0 controllerNumber=1 scan=27467	58.1079
42775:4	1	S.MP[+15.995]LP[+31.990]P[+31.990]HPGHPGYINFSY[+15.995]EVLTPLK.W		P[+16][+32]*2, Y[+16]	700.85	4	2800.38	2800.37	0	4.6	17	NRagged	88.18	88.18	0	2.44	1509	>sp|P02817|AMELX_BOVIN Amelogenin, X isoform OS=Bos taurus OX=9913 GN=AMELX PE=1 SV=2	1	hf1_10472_ebo_36_1_261219.ScanId;v=1;d1=30755.30755.3	controllerType=0 controllerNumber=1 scan=30755	64.0091
27079:3	1	S.MP[+15.995]LPPHPGHPGYIN[+0.984]F[+31.990]SY[+31.990]EVLTPLK.W		F[+32], N[+1], P[+16], Y[+32]	929.128	3	2785.37	2785.35	0	5.2	17	NRagged	98.12	98.12	0.69	2.2	1509	>sp|P02817|AMELX_BOVIN Amelogenin, X isoform OS=Bos taurus OX=9913 GN=AMELX PE=1 SV=2	1	hf1_10472_ebo_36_1_261219.ScanId;v=1;d1=20792.20792.3	controllerType=0 controllerNumber=1 scan=20792	45.9881
39694:4	1	S.MP[+15.995]LPPHPGHPGY[+31.990]INF[+31.990]SY[+15.995]EVLTPLK.W		F[+32], P[+16], Y[+16][+32]	700.85	4	2800.38	2800.37	0	4.1	17	NRagged	115.05	115.05	2	2.52	1509	>sp|P02817|AMELX_BOVIN Amelogenin, X isoform OS=Bos taurus OX=9913 GN=AMELX PE=1 SV=2	1	hf1_10472_ebo_36_1_261219.ScanId;v=1;d1=28830.28830.4	controllerType=0 controllerNumber=1 scan=28830	60.5648
25612:4	1	S.MP[+15.995]LP[+15.995]PHP[+31.990]GHPGYINF[+31.990]SYEVLTPLK.W		F[+32], P[+16]*2[+32]	700.848	4	2800.37	2800.37	0	1.3	17	NRagged	116.29	116.29	0	2.21	1509	>sp|P02817|AMELX_BOVIN Amelogenin, X isoform OS=Bos taurus OX=9913 GN=AMELX PE=1 SV=2	1	hf1_10472_ebo_36_1_261219.ScanId;v=1;d1=19821.19821.2	controllerType=0 controllerNumber=1 scan=19821	44.2729
40086:4	1	S.MP[+15.995]LPPHPGHP[+31.990]GYINF[+31.990]SY[+15.995]EVLTPLK.W		F[+32], P[+16][+32], Y[+16]	700.848	4	2800.37	2800.37	0	2.4	17	NRagged	117.45	117.45	0	2.41	1509	>sp|P02817|AMELX_BOVIN Amelogenin, X isoform OS=Bos taurus OX=9913 GN=AMELX PE=1 SV=2	1	hf1_10472_ebo_36_1_261219.ScanId;v=1;d1=29074.29074.4	controllerType=0 controllerNumber=1 scan=29074	60.9983
42850:4	1	S.MP[+15.995]LP[+15.995]PHPGHP[+31.990]GYINF[+31.990]SYEVLTPLK.W		F[+32], P[+16]*2[+32]	700.849	4	2800.37	2800.37	0	3	17	NRagged	122.44	122.44	0	2.77	1509	>sp|P02817|AMELX_BOVIN Amelogenin, X isoform OS=Bos taurus OX=9913 GN=AMELX PE=1 SV=2	1	hf1_10472_ebo_36_1_261219.ScanId;v=1;d1=30804.30804.4	controllerType=0 controllerNumber=1 scan=30804	64.0977
39398:4	1	S.MP[+15.995]LP[+15.995]PHPGHPGY[+31.990]INF[+31.990]SYEVLTPLK.W		F[+32], P[+16]*2, Y[+32]	700.848	4	2800.37	2800.37	0	1.7	17	NRagged	161.6	161.6	0	3.29	1509	>sp|P02817|AMELX_BOVIN Amelogenin, X isoform OS=Bos taurus OX=9913 GN=AMELX PE=1 SV=2	1	hf1_10472_ebo_36_1_261219.ScanId;v=1;d1=28634.28634.4	controllerType=0 controllerNumber=1 scan=28634	60.2048
45293:4	1	S.MP[+15.995]LPPHPGHP[+15.995]GY[+31.990]INF[+31.990]SYEVLTPLK.W		F[+32], P[+16]*2, Y[+32]	700.852	4	2800.39	2800.37	0	7.1	17	NRagged	335.57	335.57	0.32	5.84	1509	>sp|P02817|AMELX_BOVIN Amelogenin, X isoform OS=Bos taurus OX=9913 GN=AMELX PE=1 SV=2	1	hf1_10472_ebo_36_1_261219.ScanId;v=1;d1=33694.33694.4	controllerType=0 controllerNumber=1 scan=33694	73.5679
33415:4	1	S.MPLPPHPGHPGYINFS[+79.966]YEVLTPLKW.Y		S[+80]	743.371	4	2970.46	2970.44	0	7.4	17	Non	155.76	155.76	12.11	2.8	1509	>sp|P02817|AMELX_BOVIN Amelogenin, X isoform OS=Bos taurus OX=9913 GN=AMELX PE=1 SV=2	1	hf1_10472_ebo_36_1_261219.ScanId;v=1;d1=24867.24867.4	controllerType=0 controllerNumber=1 scan=24867	53.3947
32849:4	1	S.MPLPPHPGHPGYINFS[+79.966]YEVLTPLKW.Y		S[+80]	743.371	4	2970.46	2970.44	0	6.8	17	Non	227.07	227.07	54.95	4.24	1509	>sp|P02817|AMELX_BOVIN Amelogenin, X isoform OS=Bos taurus OX=9913 GN=AMELX PE=1 SV=2	1	hf1_10472_ebo_36_1_261219.ScanId;v=1;d1=24490.24490.4	controllerType=0 controllerNumber=1 scan=24490	52.6916
33126:4	1	S.MPLPPHPGHPGYINFS[+79.966]YEVLTPLKW.Y		S[+80]	743.371	4	2970.46	2970.44	0	7.2	17	Non	260.78	260.78	30.6	5.56	1509	>sp|P02817|AMELX_BOVIN Amelogenin, X isoform OS=Bos taurus OX=9913 GN=AMELX PE=1 SV=2	1	hf1_10472_ebo_36_1_261219.ScanId;v=1;d1=24677.24677.4	controllerType=0 controllerNumber=1 scan=24677	53.0407
29764:4	1	S.MP[+15.995]LPPHPGHPGYINFSYEVLTPLKW.Y		P[+16]	727.377	4	2906.49	2906.47	0	5.8	17	Non	479.88	479.88	4	7.77	1509	>sp|P02817|AMELX_BOVIN Amelogenin, X isoform OS=Bos taurus OX=9913 GN=AMELX PE=1 SV=2	1	hf1_10472_ebo_36_1_261219.ScanId;v=1;d1=22480.22480.4	controllerType=0 controllerNumber=1 scan=22480	49.0374
32884:3	1	S.MPLPPHPGHPGYINFS[+79.966]YEVLTPLKW.Y		S[+80]	990.824	3	2970.46	2970.44	0	5	17	Non	734.11	734.11	281.47	11.98	1509	>sp|P02817|AMELX_BOVIN Amelogenin, X isoform OS=Bos taurus OX=9913 GN=AMELX PE=1 SV=2	1	hf1_10472_ebo_36_1_261219.ScanId;v=1;d1=24513.24513.3	controllerType=0 controllerNumber=1 scan=24513	52.7349
33165:3	1	S.MPLPPHPGHPGYINFS[+79.966]YEVLTPLKW.Y		S[+80]	990.826	3	2970.46	2970.44	0	6.9	17	Non	780.83	780.83	324.81	12.91	1509	>sp|P02817|AMELX_BOVIN Amelogenin, X isoform OS=Bos taurus OX=9913 GN=AMELX PE=1 SV=2	1	hf1_10472_ebo_36_1_261219.ScanId;v=1;d1=24702.24702.3	controllerType=0 controllerNumber=1 scan=24702	53.0843
32249:4	1	S.MP[+15.995]LPPHPGHPGYINFS[+79.966]YEVLTPLKW.Y		P[+16], S[+80]	747.367	4	2986.45	2986.44	0	3.5	17	Non	223.73	223.73	5.09	3.8	1509	>sp|P02817|AMELX_BOVIN Amelogenin, X isoform OS=Bos taurus OX=9913 GN=AMELX PE=1 SV=2	1	hf1_10472_ebo_36_1_261219.ScanId;v=1;d1=24092.24092.4	controllerType=0 controllerNumber=1 scan=24092	51.9526
31368:4	1	S.MP[+15.995]LPPHPGHPGYINFS[+79.966]YEVLTPLKW.Y		P[+16], S[+80]	747.367	4	2986.45	2986.44	0	3.5	17	Non	239.21	239.21	11.57	3.8	1509	>sp|P02817|AMELX_BOVIN Amelogenin, X isoform OS=Bos taurus OX=9913 GN=AMELX PE=1 SV=2	1	hf1_10472_ebo_36_1_261219.ScanId;v=1;d1=23522.23522.4	controllerType=0 controllerNumber=1 scan=23522	50.9097
30212:4	1	S.MP[+15.995]LPPHPGHPGYIN[+0.984]FSYEVLTPLKW.Y		N[+1], P[+16]	727.624	4	2907.47	2907.45	0	6.6	17	Non	248.91	248.91	5.8	5.56	1509	>sp|P02817|AMELX_BOVIN Amelogenin, X isoform OS=Bos taurus OX=9913 GN=AMELX PE=1 SV=2	1	hf1_10472_ebo_36_1_261219.ScanId;v=1;d1=22768.22768.4	controllerType=0 controllerNumber=1 scan=22768	49.5549
31948:4	1	S.MP[+15.995]LPPHPGHPGYINFS[+79.966]YEVLTPLKW.Y		P[+16], S[+80]	747.368	4	2986.45	2986.44	0	5.1	17	Non	420.54	420.54	16.06	7.18	1509	>sp|P02817|AMELX_BOVIN Amelogenin, X isoform OS=Bos taurus OX=9913 GN=AMELX PE=1 SV=2	1	hf1_10472_ebo_36_1_261219.ScanId;v=1;d1=23903.23903.4	controllerType=0 controllerNumber=1 scan=23903	51.6092
30725:4	1	S.MP[+15.995]LPPHPGHPGYIN[+0.984]FSYEVLTPLKW.Y		N[+1], P[+16]	727.624	4	2907.47	2907.45	0	6.5	17	Non	425.62	425.62	4	7.18	1509	>sp|P02817|AMELX_BOVIN Amelogenin, X isoform OS=Bos taurus OX=9913 GN=AMELX PE=1 SV=2	1	hf1_10472_ebo_36_1_261219.ScanId;v=1;d1=23101.23101.4	controllerType=0 controllerNumber=1 scan=23101	50.1545
31645:4	1	S.MP[+15.995]LPPHPGHPGYINFS[+79.966]YEVLTPLKW.Y		P[+16], S[+80]	747.368	4	2986.45	2986.44	0	4.2	17	Non	461.39	461.39	12.18	6.76	1509	>sp|P02817|AMELX_BOVIN Amelogenin, X isoform OS=Bos taurus OX=9913 GN=AMELX PE=1 SV=2	1	hf1_10472_ebo_36_1_261219.ScanId;v=1;d1=23708.23708.4	controllerType=0 controllerNumber=1 scan=23708	51.2542
33890:3	1	S.MPLPPHPGHPGYIN[+0.984]FS[+79.966]YEVLTPLKW.Y		N[+1], S[+80]	991.154	3	2971.45	2971.43	0	7.7	17	Non	487.47	487.47	227.05	7.4	1509	>sp|P02817|AMELX_BOVIN Amelogenin, X isoform OS=Bos taurus OX=9913 GN=AMELX PE=1 SV=2	1	hf1_10472_ebo_36_1_261219.ScanId;v=1;d1=25176.25176.3	controllerType=0 controllerNumber=1 scan=25176	53.9656
31985:3	1	S.M[+15.995]PLPPHPGHPGYINFS[+79.966]YEVLTPLKW.Y		M[+16], S[+80]	996.158	3	2986.46	2986.44	0	8	17	Non	762.6	762.6	30.74	12.41	1509	>sp|P02817|AMELX_BOVIN Amelogenin, X isoform OS=Bos taurus OX=9913 GN=AMELX PE=1 SV=2	1	hf1_10472_ebo_36_1_261219.ScanId;v=1;d1=23926.23926.5	controllerType=0 controllerNumber=1 scan=23926	51.6498
31378:3	1	S.M[+15.995]PLPPHPGHPGYINFS[+79.966]YEVLTPLKW.Y		M[+16], S[+80]	996.157	3	2986.46	2986.44	0	6.8	17	Non	820.11	820.11	21.37	13.91	1509	>sp|P02817|AMELX_BOVIN Amelogenin, X isoform OS=Bos taurus OX=9913 GN=AMELX PE=1 SV=2	1	hf1_10472_ebo_36_1_261219.ScanId;v=1;d1=23530.23530.3	controllerType=0 controllerNumber=1 scan=23530	50.9274
31661:3	1	S.M[+15.995]PLPPHPGHPGYINFS[+79.966]YEVLTPLKW.Y		M[+16], S[+80]	996.155	3	2986.45	2986.44	0	4.5	17	Non	888.97	888.97	22.65	14.98	1509	>sp|P02817|AMELX_BOVIN Amelogenin, X isoform OS=Bos taurus OX=9913 GN=AMELX PE=1 SV=2	1	hf1_10472_ebo_36_1_261219.ScanId;v=1;d1=23719.23719.3	controllerType=0 controllerNumber=1 scan=23719	51.2735
32827:4	1	S.MP[+15.995]LPPHPGHPGYIN[+0.984]FS[+79.966]YEVLTPLKW.Y		N[+1], P[+16], S[+80]	747.616	4	2987.44	2987.42	0	7.9	17	Non	64.72	40.97	4	2.23	1509	>sp|P02817|AMELX_BOVIN Amelogenin, X isoform OS=Bos taurus OX=9913 GN=AMELX PE=1 SV=2	1	hf1_10472_ebo_36_1_261219.ScanId;v=1;d1=24476.24476.4	controllerType=0 controllerNumber=1 scan=24476	52.6676
31352:4	1	S.MP[+15.995]LPPHPGHP[+15.995]GYINFS[+79.966]YEVLTPLKW.Y		P[+16]*2, S[+80]	751.367	4	3002.45	3002.43	0	4.9	17	Non	112.68	112.68	0	2.26	1509	>sp|P02817|AMELX_BOVIN Amelogenin, X isoform OS=Bos taurus OX=9913 GN=AMELX PE=1 SV=2	1	hf1_10472_ebo_36_1_261219.ScanId;v=1;d1=23513.23513.4	controllerType=0 controllerNumber=1 scan=23513	50.8961
30345:4	1	S.MP[+15.995]LPPHPGHPGYINFS[+79.966]YEVLTPLKW[+15.995].Y		P[+16], S[+80], W[+16]	751.36	4	3002.42	3002.43	0	-4.8	17	Non	114.77	114.77	1.7	0.95	1509	>sp|P02817|AMELX_BOVIN Amelogenin, X isoform OS=Bos taurus OX=9913 GN=AMELX PE=1 SV=2	1	hf1_10472_ebo_36_1_261219.ScanId;v=1;d1=22857.22857.4	controllerType=0 controllerNumber=1 scan=22857	49.7178
31767:4	1	S.M[+15.995]PLPPHPGHPGYINFS[+79.966]Y[+15.995]EVLTPLKW.Y		M[+16], S[+80], Y[+16]	751.367	4	3002.45	3002.43	0	5	17	Non	149.58	149.58	8.2	2.86	1509	>sp|P02817|AMELX_BOVIN Amelogenin, X isoform OS=Bos taurus OX=9913 GN=AMELX PE=1 SV=2	1	hf1_10472_ebo_36_1_261219.ScanId;v=1;d1=23788.23788.4	controllerType=0 controllerNumber=1 scan=23788	51.3962
28957:3	1	S.MP[+15.995]LPPHPGHPGYINFS[+79.966]YEVLTPLKW[+15.995].Y		P[+16], S[+80], W[+16]	1001.49	3	3002.45	3002.43	0	6.6	17	Non	172.66	148.56	0.81	2.99	1509	>sp|P02817|AMELX_BOVIN Amelogenin, X isoform OS=Bos taurus OX=9913 GN=AMELX PE=1 SV=2	1	hf1_10472_ebo_36_1_261219.ScanId;v=1;d1=21983.21983.3	controllerType=0 controllerNumber=1 scan=21983	48.1425
45292:3	1	S.MP[+15.995]LPPHPGHPGYINFS[+79.966]YEVLTPLKW[+15.995].Y		P[+16], S[+80], W[+16]	1001.49	3	3002.46	3002.43	0	10	17	Non	184.38	184.38	2	3.78	1509	>sp|P02817|AMELX_BOVIN Amelogenin, X isoform OS=Bos taurus OX=9913 GN=AMELX PE=1 SV=2	1	hf1_10472_ebo_36_1_261219.ScanId;v=1;d1=33693.33693.3	controllerType=0 controllerNumber=1 scan=33693	73.5669
29237:4	1	S.M[+15.995]PLPPHPGHPGYINFS[+79.966]YEVLTPLKW[+15.995].Y		M[+16], S[+80], W[+16]	751.368	4	3002.45	3002.43	0	6.4	17	Non	186.23	137.03	1.56	2.8	1509	>sp|P02817|AMELX_BOVIN Amelogenin, X isoform OS=Bos taurus OX=9913 GN=AMELX PE=1 SV=2	1	hf1_10472_ebo_36_1_261219.ScanId;v=1;d1=22154.22154.4	controllerType=0 controllerNumber=1 scan=22154	48.453
29553:4	1	S.MP[+15.995]LPPHPGHPGYINFS[+79.966]YEVLTPLKW[+15.995].Y		P[+16], S[+80], W[+16]	751.368	4	3002.45	3002.43	0	5.9	17	Non	205.18	173.79	4	3.81	1509	>sp|P02817|AMELX_BOVIN Amelogenin, X isoform OS=Bos taurus OX=9913 GN=AMELX PE=1 SV=2	1	hf1_10472_ebo_36_1_261219.ScanId;v=1;d1=22349.22349.4	controllerType=0 controllerNumber=1 scan=22349	48.805
31061:4	1	S.MP[+15.995]LPPHPGHP[+15.995]GYINFS[+79.966]YEVLTPLKW.Y		P[+16]*2, S[+80]	751.367	4	3002.45	3002.43	0	4.8	17	Non	214.61	214.61	5.8	4.31	1509	>sp|P02817|AMELX_BOVIN Amelogenin, X isoform OS=Bos taurus OX=9913 GN=AMELX PE=1 SV=2	1	hf1_10472_ebo_36_1_261219.ScanId;v=1;d1=23321.23321.4	controllerType=0 controllerNumber=1 scan=23321	50.553
29874:4	1	S.M[+15.995]PLPPHPGHPGYINFS[+79.966]YEVLTPLKW[+15.995].Y		M[+16], S[+80], W[+16]	751.366	4	3002.44	3002.43	0	4.3	17	Non	218.57	168.56	2.25	3.75	1509	>sp|P02817|AMELX_BOVIN Amelogenin, X isoform OS=Bos taurus OX=9913 GN=AMELX PE=1 SV=2	1	hf1_10472_ebo_36_1_261219.ScanId;v=1;d1=22549.22549.4	controllerType=0 controllerNumber=1 scan=22549	49.1617
30184:4	1	S.M[+15.995]PLPPHPGHPGYINFS[+79.966]YEVLTPLKW[+15.995].Y		M[+16], S[+80], W[+16]	751.365	4	3002.44	3002.43	0	1.7	17	Non	258.06	258.06	3.07	4.91	1509	>sp|P02817|AMELX_BOVIN Amelogenin, X isoform OS=Bos taurus OX=9913 GN=AMELX PE=1 SV=2	1	hf1_10472_ebo_36_1_261219.ScanId;v=1;d1=22751.22751.6	controllerType=0 controllerNumber=1 scan=22751	49.5236
31394:3	1	S.M[+15.995]PLPPHP[+15.995]GHPGYINFS[+79.966]YEVLTPLKW.Y		M[+16], P[+16], S[+80]	1001.49	3	3002.45	3002.43	0	4.8	17	Non	296.87	296.87	0.53	6.05	1509	>sp|P02817|AMELX_BOVIN Amelogenin, X isoform OS=Bos taurus OX=9913 GN=AMELX PE=1 SV=2	1	hf1_10472_ebo_36_1_261219.ScanId;v=1;d1=23540.23540.3	controllerType=0 controllerNumber=1 scan=23540	50.9453
32538:4	1	S.MP[+15.995]LPPHPGHPGYIN[+0.984]FS[+79.966]YEVLTPLKW.Y		N[+1], P[+16], S[+80]	747.616	4	2987.44	2987.42	0	6.8	17	Non	343.62	275.43	0.07	5.9	1509	>sp|P02817|AMELX_BOVIN Amelogenin, X isoform OS=Bos taurus OX=9913 GN=AMELX PE=1 SV=2	1	hf1_10472_ebo_36_1_261219.ScanId;v=1;d1=24283.24283.4	controllerType=0 controllerNumber=1 scan=24283	52.307
29859:3	1	S.MP[+15.995]LPPHPGHPGYINFS[+79.966]YEVLTPLKW[+31.990].Y		P[+16], S[+80], W[+32]	1006.82	3	3018.44	3018.43	0	4	17	Non	384.59	258.32	4	5.74	1509	>sp|P02817|AMELX_BOVIN Amelogenin, X isoform OS=Bos taurus OX=9913 GN=AMELX PE=1 SV=2	1	hf1_10472_ebo_36_1_261219.ScanId;v=1;d1=22540.22540.3	controllerType=0 controllerNumber=1 scan=22540	49.1453
29586:3	1	S.MP[+15.995]LPPHPGHPGYINFS[+79.966]YEVLTPLKW[+15.995].Y		P[+16], S[+80], W[+16]	1001.49	3	3002.45	3002.43	0	7	17	Non	400.69	400.69	4	7.28	1509	>sp|P02817|AMELX_BOVIN Amelogenin, X isoform OS=Bos taurus OX=9913 GN=AMELX PE=1 SV=2	1	hf1_10472_ebo_36_1_261219.ScanId;v=1;d1=22369.22369.3	controllerType=0 controllerNumber=1 scan=22369	48.8409
31097:3	1	S.M[+15.995]PLPPHPGHPGYINFS[+79.966]Y[+15.995]EVLTPLKW.Y		M[+16], S[+80], Y[+16]	1001.49	3	3002.45	3002.43	0	6.7	17	Non	468.53	468.53	17.83	7.44	1509	>sp|P02817|AMELX_BOVIN Amelogenin, X isoform OS=Bos taurus OX=9913 GN=AMELX PE=1 SV=2	1	hf1_10472_ebo_36_1_261219.ScanId;v=1;d1=23343.23343.3	controllerType=0 controllerNumber=1 scan=23343	50.592
32806:3	1	S.M[+15.995]PLPPHPGHPGYIN[+0.984]FS[+79.966]YEVLTPLKW.Y		M[+16], N[+1], S[+80]	996.483	3	2987.43	2987.42	0	4.7	17	Non	488.65	404.91	6.91	7.56	1509	>sp|P02817|AMELX_BOVIN Amelogenin, X isoform OS=Bos taurus OX=9913 GN=AMELX PE=1 SV=2	1	hf1_10472_ebo_36_1_261219.ScanId;v=1;d1=24463.24463.3	controllerType=0 controllerNumber=1 scan=24463	52.6452
29267:3	1	S.MP[+15.995]LPPHPGHPGYINFS[+79.966]YEVLTPLKW[+15.995].Y		P[+16], S[+80], W[+16]	1001.49	3	3002.45	3002.43	0	6	17	Non	523.27	523.27	2	7.7	1509	>sp|P02817|AMELX_BOVIN Amelogenin, X isoform OS=Bos taurus OX=9913 GN=AMELX PE=1 SV=2	1	hf1_10472_ebo_36_1_261219.ScanId;v=1;d1=22172.22172.3	controllerType=0 controllerNumber=1 scan=22172	48.4859
29891:3	1	S.M[+15.995]PLPPHPGHPGYINFS[+79.966]YEVLTPLKW[+15.995].Y		M[+16], S[+80], W[+16]	1001.49	3	3002.44	3002.43	0	4.1	17	Non	582.35	582.35	5.02	8.46	1509	>sp|P02817|AMELX_BOVIN Amelogenin, X isoform OS=Bos taurus OX=9913 GN=AMELX PE=1 SV=2	1	hf1_10472_ebo_36_1_261219.ScanId;v=1;d1=22560.22560.3	controllerType=0 controllerNumber=1 scan=22560	49.1812
32260:3	1	S.M[+15.995]PLPPHPGHPGYIN[+0.984]FS[+79.966]YEVLTPLKW.Y		M[+16], N[+1], S[+80]	996.486	3	2987.44	2987.42	0	8	17	Non	719.99	588.38	8.04	11.91	1509	>sp|P02817|AMELX_BOVIN Amelogenin, X isoform OS=Bos taurus OX=9913 GN=AMELX PE=1 SV=2	1	hf1_10472_ebo_36_1_261219.ScanId;v=1;d1=24099.24099.3	controllerType=0 controllerNumber=1 scan=24099	51.9661
32536:3	1	S.M[+15.995]PLPPHPGHPGYIN[+0.984]FS[+79.966]YEVLTPLKW.Y		M[+16], N[+1], S[+80]	996.485	3	2987.44	2987.42	0	6.6	17	Non	880.94	615.1	20.92	14.91	1509	>sp|P02817|AMELX_BOVIN Amelogenin, X isoform OS=Bos taurus OX=9913 GN=AMELX PE=1 SV=2	1	hf1_10472_ebo_36_1_261219.ScanId;v=1;d1=24282.24282.3	controllerType=0 controllerNumber=1 scan=24282	52.3055
34005:4	1	S.MPLP[+15.995]P[+31.990]HP[+31.990]GHPGYIN[+0.984]FSYEVLTPLKW.Y		N[+1], P[+16][+32]*2	743.617	4	2971.45	2971.43	0	4.9	17	Non	54.13	54.13	0	2.24	1509	>sp|P02817|AMELX_BOVIN Amelogenin, X isoform OS=Bos taurus OX=9913 GN=AMELX PE=1 SV=2	1	hf1_10472_ebo_36_1_261219.ScanId;v=1;d1=25249.25249.4	controllerType=0 controllerNumber=1 scan=25249	54.0994
32134:3	1	S.MP[+15.995]LPPHPGHP[+15.995]GYINF[+31.990]SY[+31.990]EVLTPLKW.Y		F[+32], P[+16]*2, Y[+32]	996.16	3	2986.47	2986.44	0	7.4	17	Non	257.32	257.32	4	5.8	1509	>sp|P02817|AMELX_BOVIN Amelogenin, X isoform OS=Bos taurus OX=9913 GN=AMELX PE=1 SV=2	1	hf1_10472_ebo_36_1_261219.ScanId;v=1;d1=24021.24021.3	controllerType=0 controllerNumber=1 scan=24021	51.8254
45281:4	1	S.MP[+15.995]LPPHPGHPGY[+31.990]INF[+31.990]SY[+15.995]EVLTPLKW.Y		F[+32], P[+16], Y[+16][+32]	747.372	4	2986.47	2986.44	0	7.3	17	Non	269.24	269.24	0	5.56	1509	>sp|P02817|AMELX_BOVIN Amelogenin, X isoform OS=Bos taurus OX=9913 GN=AMELX PE=1 SV=2	1	hf1_10472_ebo_36_1_261219.ScanId;v=1;d1=33685.33685.4	controllerType=0 controllerNumber=1 scan=33685	73.5518
45266:3	1	S.M[+15.995]PLPPHPGHP[+31.990]GY[+31.990]INF[+15.995]SYEVLTPLKW.Y		F[+16], M[+16], P[+32], Y[+32]	996.161	3	2986.47	2986.44	0	8	17	Non	437.07	437.07	4.58	7.28	1509	>sp|P02817|AMELX_BOVIN Amelogenin, X isoform OS=Bos taurus OX=9913 GN=AMELX PE=1 SV=2	1	hf1_10472_ebo_36_1_261219.ScanId;v=1;d1=33676.33676.3	controllerType=0 controllerNumber=1 scan=33676	73.5354
31296:4	1	S.MP[+15.995]LPPHPGHPGYINFSYEVLTPLKWY.Q		P[+16]	768.138	4	3069.53	3069.53	0	-0.5	17	Non	219.38	219.38	4	3.44	1509	>sp|P02817|AMELX_BOVIN Amelogenin, X isoform OS=Bos taurus OX=9913 GN=AMELX PE=1 SV=2	1	hf1_10472_ebo_36_1_261219.ScanId;v=1;d1=23478.23478.4	controllerType=0 controllerNumber=1 scan=23478	50.832
32168:4	1	S.MP[+15.995]LPPHPGHPGYINFSYEVLTPLKWY.Q		P[+16]	768.142	4	3069.55	3069.53	0	4.2	17	Non	265.31	265.31	5.5	5.03	1509	>sp|P02817|AMELX_BOVIN Amelogenin, X isoform OS=Bos taurus OX=9913 GN=AMELX PE=1 SV=2	1	hf1_10472_ebo_36_1_261219.ScanId;v=1;d1=24041.24041.4	controllerType=0 controllerNumber=1 scan=24041	51.8613
34328:4	1	S.MPLPPHPGHPGYINFS[+79.966]YEVLTPLKWY.Q		S[+80]	784.137	4	3133.53	3133.5	0	7	17	Non	287.94	287.94	36.01	5.64	1509	>sp|P02817|AMELX_BOVIN Amelogenin, X isoform OS=Bos taurus OX=9913 GN=AMELX PE=1 SV=2	1	hf1_10472_ebo_36_1_261219.ScanId;v=1;d1=25454.25454.4	controllerType=0 controllerNumber=1 scan=25454	54.4762
31849:4	1	S.M[+15.995]PLPPHPGHPGYINFSYEVLTPLKWY.Q		M[+16]	768.14	4	3069.54	3069.53	0	2.2	17	Non	334.94	334.94	0.66	5.37	1509	>sp|P02817|AMELX_BOVIN Amelogenin, X isoform OS=Bos taurus OX=9913 GN=AMELX PE=1 SV=2	1	hf1_10472_ebo_36_1_261219.ScanId;v=1;d1=23844.23844.4	controllerType=0 controllerNumber=1 scan=23844	51.5001
30699:4	1	S.MP[+15.995]LPPHPGHPGYINFSYEVLTPLKWY.Q		P[+16]	768.142	4	3069.55	3069.53	0	4.3	17	Non	344.39	344.39	4	6.1	1509	>sp|P02817|AMELX_BOVIN Amelogenin, X isoform OS=Bos taurus OX=9913 GN=AMELX PE=1 SV=2	1	hf1_10472_ebo_36_1_261219.ScanId;v=1;d1=23084.23084.4	controllerType=0 controllerNumber=1 scan=23084	50.1232
30985:4	1	S.MP[+15.995]LPPHPGHPGYINFSYEVLTPLKWY.Q		P[+16]	768.144	4	3069.55	3069.53	0	6.7	17	Non	369.68	369.68	5.5	6.93	1509	>sp|P02817|AMELX_BOVIN Amelogenin, X isoform OS=Bos taurus OX=9913 GN=AMELX PE=1 SV=2	1	hf1_10472_ebo_36_1_261219.ScanId;v=1;d1=23273.23273.4	controllerType=0 controllerNumber=1 scan=23273	50.4663
34648:3	1	S.MPLPPHPGHPGYINFS[+79.966]YEVLTPLKWY.Q		S[+80]	1045.18	3	3133.52	3133.5	0	6.2	17	Non	412.09	412.09	95.93	7.04	1509	>sp|P02817|AMELX_BOVIN Amelogenin, X isoform OS=Bos taurus OX=9913 GN=AMELX PE=1 SV=2	1	hf1_10472_ebo_36_1_261219.ScanId;v=1;d1=25654.25654.3	controllerType=0 controllerNumber=1 scan=25654	54.8372
34343:3	1	S.MPLPPHPGHPGYINFS[+79.966]YEVLTPLKWY.Q		S[+80]	1045.18	3	3133.53	3133.5	0	7.3	17	Non	809.82	809.82	290.79	13.82	1509	>sp|P02817|AMELX_BOVIN Amelogenin, X isoform OS=Bos taurus OX=9913 GN=AMELX PE=1 SV=2	1	hf1_10472_ebo_36_1_261219.ScanId;v=1;d1=25464.25464.3	controllerType=0 controllerNumber=1 scan=25464	54.4942
39512:3	1	S.MP[+15.995]LPPHPGHPGYINFS[+79.966]YEVLTPLKWY.Q		P[+16], S[+80]	1050.51	3	3149.5	3149.5	0	1.3	17	Non	11.14	11.14	4	2.21	1509	>sp|P02817|AMELX_BOVIN Amelogenin, X isoform OS=Bos taurus OX=9913 GN=AMELX PE=1 SV=2	1	hf1_10472_ebo_36_1_261219.ScanId;v=1;d1=28712.28712.5	controllerType=0 controllerNumber=1 scan=28712	60.3488
42320:4	1	S.MP[+15.995]LPPHPGHPGYINFS[+79.966]YEVLTPLKWY.Q		P[+16], S[+80]	788.137	4	3149.52	3149.5	0	8	17	Non	32.33	32.33	4	2.22	1509	>sp|P02817|AMELX_BOVIN Amelogenin, X isoform OS=Bos taurus OX=9913 GN=AMELX PE=1 SV=2	1	hf1_10472_ebo_36_1_261219.ScanId;v=1;d1=30480.30480.4	controllerType=0 controllerNumber=1 scan=30480	63.5191
32785:5	1	S.MP[+15.995]LPPHPGHPGYINFS[+79.966]YEVLTPLKWY.Q		P[+16], S[+80]	630.71	5	3149.52	3149.5	0	5.9	17	Non	58.6	58.6	4	2.22	1509	>sp|P02817|AMELX_BOVIN Amelogenin, X isoform OS=Bos taurus OX=9913 GN=AMELX PE=1 SV=2	1	hf1_10472_ebo_36_1_261219.ScanId;v=1;d1=24447.24447.5	controllerType=0 controllerNumber=1 scan=24447	52.6153
40102:3	1	S.M[+15.995]PLPPHPGHPGYINFS[+79.966]YEVLTPLKWY.Q		M[+16], S[+80]	1050.51	3	3149.52	3149.5	0	7.7	17	Non	101.05	101.05	11.96	2.62	1509	>sp|P02817|AMELX_BOVIN Amelogenin, X isoform OS=Bos taurus OX=9913 GN=AMELX PE=1 SV=2	1	hf1_10472_ebo_36_1_261219.ScanId;v=1;d1=29084.29084.5	controllerType=0 controllerNumber=1 scan=29084	61.0164
42165:3	1	S.MP[+15.995]LPPHPGHPGYINFS[+79.966]YEVLTPLKWY.Q		P[+16], S[+80]	1050.51	3	3149.51	3149.5	0	4.8	17	Non	104.56	104.56	4	3.02	1509	>sp|P02817|AMELX_BOVIN Amelogenin, X isoform OS=Bos taurus OX=9913 GN=AMELX PE=1 SV=2	1	hf1_10472_ebo_36_1_261219.ScanId;v=1;d1=30386.30386.3	controllerType=0 controllerNumber=1 scan=30386	63.3496
34761:3	1	S.MP[+15.995]LPPHPGHPGYINFS[+79.966]YEVLTPLKWY.Q		P[+16], S[+80]	1050.51	3	3149.52	3149.5	0	7.5	17	Non	190.19	190.19	4	3.88	1509	>sp|P02817|AMELX_BOVIN Amelogenin, X isoform OS=Bos taurus OX=9913 GN=AMELX PE=1 SV=2	1	hf1_10472_ebo_36_1_261219.ScanId;v=1;d1=25728.25728.3	controllerType=0 controllerNumber=1 scan=25728	54.9754
35700:3	1	S.M[+15.995]PLPPHPGHPGYINFS[+79.966]YEVLTPLKWY.Q		M[+16], S[+80]	1050.51	3	3149.52	3149.5	0	7.1	17	Non	227.55	227.55	9.85	3.93	1509	>sp|P02817|AMELX_BOVIN Amelogenin, X isoform OS=Bos taurus OX=9913 GN=AMELX PE=1 SV=2	1	hf1_10472_ebo_36_1_261219.ScanId;v=1;d1=26325.26325.5	controllerType=0 controllerNumber=1 scan=26325	56.0599
38327:3	1	S.MP[+15.995]LPPHPGHPGYINFS[+79.966]YEVLTPLKWY.Q		P[+16], S[+80]	1050.51	3	3149.52	3149.5	0	7.9	17	Non	235.04	235.04	5.8	3.93	1509	>sp|P02817|AMELX_BOVIN Amelogenin, X isoform OS=Bos taurus OX=9913 GN=AMELX PE=1 SV=2	1	hf1_10472_ebo_36_1_261219.ScanId;v=1;d1=27968.27968.5	controllerType=0 controllerNumber=1 scan=27968	59.0116
35229:3	1	S.MPLPPHPGHPGYIN[+0.984]FS[+79.966]YEVLTPLKWY.Q		N[+1], S[+80]	1045.51	3	3134.51	3134.49	0	6.4	17	Non	239.4	239.4	69.7	3.93	1509	>sp|P02817|AMELX_BOVIN Amelogenin, X isoform OS=Bos taurus OX=9913 GN=AMELX PE=1 SV=2	1	hf1_10472_ebo_36_1_261219.ScanId;v=1;d1=26025.26025.3	controllerType=0 controllerNumber=1 scan=26025	55.5204
45242:3	1	S.MP[+15.995]LPPHPGHPGYINFS[+79.966]YEVLTPLKWY.Q		P[+16], S[+80]	1050.51	3	3149.52	3149.5	0	7.3	17	Non	242.15	242.15	4	5.71	1509	>sp|P02817|AMELX_BOVIN Amelogenin, X isoform OS=Bos taurus OX=9913 GN=AMELX PE=1 SV=2	1	hf1_10472_ebo_36_1_261219.ScanId;v=1;d1=33659.33659.3	controllerType=0 controllerNumber=1 scan=33659	73.5071
45263:4	1	S.MP[+15.995]LPPHPGHPGYINFS[+79.966]YEVLTPLKWY.Q		P[+16], S[+80]	788.138	4	3149.53	3149.5	0	9.7	17	Non	255.4	255.4	4	4.82	1509	>sp|P02817|AMELX_BOVIN Amelogenin, X isoform OS=Bos taurus OX=9913 GN=AMELX PE=1 SV=2	1	hf1_10472_ebo_36_1_261219.ScanId;v=1;d1=33673.33673.4	controllerType=0 controllerNumber=1 scan=33673	73.5309
34125:4	1	S.MP[+15.995]LPPHPGHPGYINFS[+79.966]YEVLTPLKWY.Q		P[+16], S[+80]	788.133	4	3149.51	3149.5	0	3.8	17	Non	264.62	264.62	5.8	5.02	1509	>sp|P02817|AMELX_BOVIN Amelogenin, X isoform OS=Bos taurus OX=9913 GN=AMELX PE=1 SV=2	1	hf1_10472_ebo_36_1_261219.ScanId;v=1;d1=25324.25324.4	controllerType=0 controllerNumber=1 scan=25324	54.2361
34938:3	1	S.MPLPPHPGHPGYIN[+0.984]FS[+79.966]YEVLTPLKWY.Q		N[+1], S[+80]	1045.51	3	3134.51	3134.49	0	6.5	17	Non	309.67	309.67	76.32	5.88	1509	>sp|P02817|AMELX_BOVIN Amelogenin, X isoform OS=Bos taurus OX=9913 GN=AMELX PE=1 SV=2	1	hf1_10472_ebo_36_1_261219.ScanId;v=1;d1=25840.25840.3	controllerType=0 controllerNumber=1 scan=25840	55.1827
33188:4	1	S.MP[+15.995]LPPHPGHPGYINFS[+79.966]YEVLTPLKWY.Q		P[+16], S[+80]	788.136	4	3149.52	3149.5	0	6.7	17	Non	328.46	328.46	4	5.8	1509	>sp|P02817|AMELX_BOVIN Amelogenin, X isoform OS=Bos taurus OX=9913 GN=AMELX PE=1 SV=2	1	hf1_10472_ebo_36_1_261219.ScanId;v=1;d1=24719.24719.4	controllerType=0 controllerNumber=1 scan=24719	53.1186
32644:4	1	S.MP[+15.995]LPPHPGHPGYINFS[+79.966]YEVLTPLKWY.Q		P[+16], S[+80]	788.135	4	3149.52	3149.5	0	6.1	17	Non	334.55	334.55	4	5.88	1509	>sp|P02817|AMELX_BOVIN Amelogenin, X isoform OS=Bos taurus OX=9913 GN=AMELX PE=1 SV=2	1	hf1_10472_ebo_36_1_261219.ScanId;v=1;d1=24354.24354.4	controllerType=0 controllerNumber=1 scan=24354	52.4403
32915:4	1	S.MP[+15.995]LPPHPGHPGYINFS[+79.966]YEVLTPLKWY.Q		P[+16], S[+80]	788.136	4	3149.52	3149.5	0	6.7	17	Non	352.5	352.5	4	6.02	1509	>sp|P02817|AMELX_BOVIN Amelogenin, X isoform OS=Bos taurus OX=9913 GN=AMELX PE=1 SV=2	1	hf1_10472_ebo_36_1_261219.ScanId;v=1;d1=24536.24536.4	controllerType=0 controllerNumber=1 scan=24536	52.7783
34226:3	1	S.M[+15.995]PLPPHPGHPGYINFS[+79.966]YEVLTPLKWY.Q		M[+16], S[+80]	1050.51	3	3149.51	3149.5	0	3.4	17	Non	427.34	427.34	6.53	6.8	1509	>sp|P02817|AMELX_BOVIN Amelogenin, X isoform OS=Bos taurus OX=9913 GN=AMELX PE=1 SV=2	1	hf1_10472_ebo_36_1_261219.ScanId;v=1;d1=25386.25386.3	controllerType=0 controllerNumber=1 scan=25386	54.3472
33461:3	1	S.M[+15.995]PLPPHPGHPGYINFS[+79.966]YEVLTPLKWY.Q		M[+16], S[+80]	1050.51	3	3149.51	3149.5	0	4.4	17	Non	667.46	667.46	7.72	10.89	1509	>sp|P02817|AMELX_BOVIN Amelogenin, X isoform OS=Bos taurus OX=9913 GN=AMELX PE=1 SV=2	1	hf1_10472_ebo_36_1_261219.ScanId;v=1;d1=24896.24896.3	controllerType=0 controllerNumber=1 scan=24896	53.4472
32627:3	1	S.M[+15.995]PLPPHPGHPGYINFS[+79.966]YEVLTPLKWY.Q		M[+16], S[+80]	1050.51	3	3149.52	3149.5	0	6.4	17	Non	741.81	741.81	1.68	11.82	1509	>sp|P02817|AMELX_BOVIN Amelogenin, X isoform OS=Bos taurus OX=9913 GN=AMELX PE=1 SV=2	1	hf1_10472_ebo_36_1_261219.ScanId;v=1;d1=24343.24343.3	controllerType=0 controllerNumber=1 scan=24343	52.4179
33172:3	1	S.M[+15.995]PLPPHPGHPGYINFS[+79.966]YEVLTPLKWY.Q		M[+16], S[+80]	1050.51	3	3149.52	3149.5	0	6.6	17	Non	897.99	897.99	4.59	14.82	1509	>sp|P02817|AMELX_BOVIN Amelogenin, X isoform OS=Bos taurus OX=9913 GN=AMELX PE=1 SV=2	1	hf1_10472_ebo_36_1_261219.ScanId;v=1;d1=24709.24709.3	controllerType=0 controllerNumber=1 scan=24709	53.1007
32901:3	1	S.M[+15.995]PLPPHPGHPGYINFS[+79.966]YEVLTPLKWY.Q		M[+16], S[+80]	1050.51	3	3149.52	3149.5	0	6.4	17	Non	899.73	899.73	18.93	14.82	1509	>sp|P02817|AMELX_BOVIN Amelogenin, X isoform OS=Bos taurus OX=9913 GN=AMELX PE=1 SV=2	1	hf1_10472_ebo_36_1_261219.ScanId;v=1;d1=24525.24525.3	controllerType=0 controllerNumber=1 scan=24525	52.7588
29698:4	1	S.MP[+15.995]LPPHPGHPGYINFS[+79.966]YEVLTPLKW[+15.995]Y.Q		P[+16], S[+80], W[+16]	792.13	4	3165.5	3165.49	0	1	17	Non	47.84	36.71	0	1.15	1509	>sp|P02817|AMELX_BOVIN Amelogenin, X isoform OS=Bos taurus OX=9913 GN=AMELX PE=1 SV=2	1	hf1_10472_ebo_36_1_261219.ScanId;v=1;d1=22441.22441.5	controllerType=0 controllerNumber=1 scan=22441	48.967
33473:3	1	S.M[+15.995]PLPPHPGHPGYINFSYEVLTPLKW[+31.990]Y[+31.990].Q		M[+16], W[+32], Y[+32]	1045.18	3	3133.52	3133.51	0	2.2	17	Non	76.24	76.24	0	2.22	1509	>sp|P02817|AMELX_BOVIN Amelogenin, X isoform OS=Bos taurus OX=9913 GN=AMELX PE=1 SV=2	1	hf1_10472_ebo_36_1_261219.ScanId;v=1;d1=24902.24902.5	controllerType=0 controllerNumber=1 scan=24902	53.4563
34030:4	1	S.MP[+15.995]LPPHPGHPGYINF[+31.990]SY[+31.990]EVLTPLKWY.Q		F[+32], P[+16], Y[+32]	784.135	4	3133.52	3133.51	0	2	17	Non	120.28	120.28	2.99	2.39	1509	>sp|P02817|AMELX_BOVIN Amelogenin, X isoform OS=Bos taurus OX=9913 GN=AMELX PE=1 SV=2	1	hf1_10472_ebo_36_1_261219.ScanId;v=1;d1=25264.25264.4	controllerType=0 controllerNumber=1 scan=25264	54.125
31532:4	1	S.MP[+15.995]LPPHPGHPGYINFS[+79.966]YEVLTPLKW[+15.995]Y.Q		P[+16], S[+80], W[+16]	792.13	4	3165.5	3165.49	0	1.8	17	Non	121.39	121.39	5.8	2.22	1509	>sp|P02817|AMELX_BOVIN Amelogenin, X isoform OS=Bos taurus OX=9913 GN=AMELX PE=1 SV=2	1	hf1_10472_ebo_36_1_261219.ScanId;v=1;d1=23630.23630.4	controllerType=0 controllerNumber=1 scan=23630	51.109
32948:4	1	S.MP[+15.995]LPPHPGHPGYINFS[+79.966]Y[+31.990]EVLTPLKWY.Q		P[+16], S[+80], Y[+32]	796.13	4	3181.5	3181.49	0	3	17	Non	133.18	133.18	4	2.24	1509	>sp|P02817|AMELX_BOVIN Amelogenin, X isoform OS=Bos taurus OX=9913 GN=AMELX PE=1 SV=2	1	hf1_10472_ebo_36_1_261219.ScanId;v=1;d1=24556.24556.4	controllerType=0 controllerNumber=1 scan=24556	52.8143
29429:4	1	S.MP[+15.995]LPPHPGHPGYINFS[+79.966]YEVLTPLKW[+15.995]Y.Q		P[+16], S[+80], W[+16]	792.134	4	3165.51	3165.49	0	5.9	17	Non	141.75	141.75	0.06	2.79	1509	>sp|P02817|AMELX_BOVIN Amelogenin, X isoform OS=Bos taurus OX=9913 GN=AMELX PE=1 SV=2	1	hf1_10472_ebo_36_1_261219.ScanId;v=1;d1=22270.22270.4	controllerType=0 controllerNumber=1 scan=22270	48.6627
29444:3	1	S.MP[+15.995]LPPHPGHPGYINFS[+79.966]YEVLTPLKWY[+31.990].Q		P[+16], S[+80], Y[+32]	1061.17	3	3181.51	3181.49	0	5.7	17	Non	143.88	143.88	0	2.38	1509	>sp|P02817|AMELX_BOVIN Amelogenin, X isoform OS=Bos taurus OX=9913 GN=AMELX PE=1 SV=2	1	hf1_10472_ebo_36_1_261219.ScanId;v=1;d1=22279.22279.3	controllerType=0 controllerNumber=1 scan=22279	48.6793
30111:4	1	S.M[+15.995]PLPPHPGHPGYINFS[+79.966]YEVLTPLKW[+15.995]Y.Q		M[+16], S[+80], W[+16]	792.132	4	3165.51	3165.49	0	4.2	17	Non	161.66	71.49	8.42	2.29	1509	>sp|P02817|AMELX_BOVIN Amelogenin, X isoform OS=Bos taurus OX=9913 GN=AMELX PE=1 SV=2	1	hf1_10472_ebo_36_1_261219.ScanId;v=1;d1=22704.22704.5	controllerType=0 controllerNumber=1 scan=22704	49.4385
33542:4	1	S.MP[+15.995]LPPHPGHPGYIN[+0.984]FS[+79.966]YEVLTPLKWY.Q		N[+1], P[+16], S[+80]	788.382	4	3150.51	3150.48	0	7.6	17	Non	181.13	181.13	5.8	3.65	1509	>sp|P02817|AMELX_BOVIN Amelogenin, X isoform OS=Bos taurus OX=9913 GN=AMELX PE=1 SV=2	1	hf1_10472_ebo_36_1_261219.ScanId;v=1;d1=24946.24946.4	controllerType=0 controllerNumber=1 scan=24946	53.5372
33635:4	1	S.MP[+15.995]LPPHPGHPGY[+15.995]INFS[+79.966]YEVLTPLKWY.Q		P[+16], S[+80], Y[+16]	792.132	4	3165.51	3165.49	0	3.7	17	Non	191.41	191.41	4	3.66	1509	>sp|P02817|AMELX_BOVIN Amelogenin, X isoform OS=Bos taurus OX=9913 GN=AMELX PE=1 SV=2	1	hf1_10472_ebo_36_1_261219.ScanId;v=1;d1=25007.25007.4	controllerType=0 controllerNumber=1 scan=25007	53.6469
30748:4	1	S.MP[+15.995]LPPHPGHPGYINFS[+79.966]YEVLTPLKW[+15.995]Y.Q		P[+16], S[+80], W[+16]	792.131	4	3165.5	3165.49	0	2.4	17	Non	191.78	191.78	5.8	3.66	1509	>sp|P02817|AMELX_BOVIN Amelogenin, X isoform OS=Bos taurus OX=9913 GN=AMELX PE=1 SV=2	1	hf1_10472_ebo_36_1_261219.ScanId;v=1;d1=23117.23117.4	controllerType=0 controllerNumber=1 scan=23117	50.1844
33922:3	1	S.MP[+15.995]LPPHPGHPGYINFS[+79.966]YEVLTP[+15.995]LKWY.Q		P[+16]*2, S[+80]	1055.84	3	3165.5	3165.49	0	3.3	17	Non	193.19	193.19	5.8	3.89	1509	>sp|P02817|AMELX_BOVIN Amelogenin, X isoform OS=Bos taurus OX=9913 GN=AMELX PE=1 SV=2	1	hf1_10472_ebo_36_1_261219.ScanId;v=1;d1=25196.25196.3	controllerType=0 controllerNumber=1 scan=25196	54.0017
33325:4	1	S.MP[+15.995]LPPHPGHPGY[+15.995]INFS[+79.966]YEVLTPLKWY.Q		P[+16], S[+80], Y[+16]	792.135	4	3165.52	3165.49	0	8.2	17	Non	195.45	195.45	4.61	3.65	1509	>sp|P02817|AMELX_BOVIN Amelogenin, X isoform OS=Bos taurus OX=9913 GN=AMELX PE=1 SV=2	1	hf1_10472_ebo_36_1_261219.ScanId;v=1;d1=24811.24811.4	controllerType=0 controllerNumber=1 scan=24811	53.2898
30525:3	1	S.MP[+15.995]LPPHPGHPGYINFS[+79.966]YEVLTPLKW[+15.995]Y.Q		P[+16], S[+80], W[+16]	1055.84	3	3165.51	3165.49	0	5.2	17	Non	199.86	199.86	0	3.03	1509	>sp|P02817|AMELX_BOVIN Amelogenin, X isoform OS=Bos taurus OX=9913 GN=AMELX PE=1 SV=2	1	hf1_10472_ebo_36_1_261219.ScanId;v=1;d1=22968.22968.3	controllerType=0 controllerNumber=1 scan=22968	49.9135
34126:4	1	S.MP[+15.995]LPPHPGHPGYIN[+0.984]FS[+79.966]YEVLTPLKWY.Q		N[+1], P[+16], S[+80]	788.382	4	3150.51	3150.48	0	7.6	17	Non	208.55	208.55	5.8	4.14	1509	>sp|P02817|AMELX_BOVIN Amelogenin, X isoform OS=Bos taurus OX=9913 GN=AMELX PE=1 SV=2	1	hf1_10472_ebo_36_1_261219.ScanId;v=1;d1=25324.25324.4	controllerType=0 controllerNumber=1 scan=25324	54.2361
34055:3	1	S.MP[+15.995]LPPHPGHPGYINF[+31.990]SY[+31.990]EVLTPLKWY.Q		F[+32], P[+16], Y[+32]	1045.18	3	3133.52	3133.51	0	2.9	17	Non	209.76	209.76	5.8	3.5	1509	>sp|P02817|AMELX_BOVIN Amelogenin, X isoform OS=Bos taurus OX=9913 GN=AMELX PE=1 SV=2	1	hf1_10472_ebo_36_1_261219.ScanId;v=1;d1=25280.25280.3	controllerType=0 controllerNumber=1 scan=25280	54.155
32215:4	1	S.M[+15.995]PLPPHPGHPGYINFS[+79.966]YEVLTPLKW[+15.995]Y.Q		M[+16], S[+80], W[+16]	792.134	4	3165.51	3165.49	0	5.9	17	Non	212.38	212.38	2.64	3.77	1509	>sp|P02817|AMELX_BOVIN Amelogenin, X isoform OS=Bos taurus OX=9913 GN=AMELX PE=1 SV=2	1	hf1_10472_ebo_36_1_261219.ScanId;v=1;d1=24069.24069.4	controllerType=0 controllerNumber=1 scan=24069	51.9094
36303:3	1	S.MP[+15.995]LPPHP[+15.995]GHPGYINFS[+79.966]YEVLTPLKWY.Q		P[+16]*2, S[+80]	1055.84	3	3165.52	3165.49	0	7.5	17	Non	223.11	223.11	4	4.38	1509	>sp|P02817|AMELX_BOVIN Amelogenin, X isoform OS=Bos taurus OX=9913 GN=AMELX PE=1 SV=2	1	hf1_10472_ebo_36_1_261219.ScanId;v=1;d1=26709.26709.3	controllerType=0 controllerNumber=1 scan=26709	56.751
33964:3	1	S.MP[+15.995]LPPHPGHPGYIN[+0.984]FS[+79.966]YEVLTPLKWY.Q		N[+1], P[+16], S[+80]	1050.84	3	3150.51	3150.48	0	8	17	Non	260.68	260.68	4	5.71	1509	>sp|P02817|AMELX_BOVIN Amelogenin, X isoform OS=Bos taurus OX=9913 GN=AMELX PE=1 SV=2	1	hf1_10472_ebo_36_1_261219.ScanId;v=1;d1=25226.25226.5	controllerType=0 controllerNumber=1 scan=25226	54.0588
32062:3	1	S.MP[+15.995]LPPHPGHPGYINFS[+79.966]YEVLTPLKWY[+31.990].Q		P[+16], S[+80], Y[+32]	1061.17	3	3181.51	3181.49	0	5.2	17	Non	261.09	261.09	0	5.79	1509	>sp|P02817|AMELX_BOVIN Amelogenin, X isoform OS=Bos taurus OX=9913 GN=AMELX PE=1 SV=2	1	hf1_10472_ebo_36_1_261219.ScanId;v=1;d1=23974.23974.3	controllerType=0 controllerNumber=1 scan=23974	51.7368
32699:3	1	S.MP[+15.995]LPPHPGHPGYINFS[+79.966]YEVLTP[+31.990]LKWY.Q		P[+16][+32], S[+80]	1061.17	3	3181.51	3181.49	0	6	17	Non	267.4	267.4	5.8	5.79	1509	>sp|P02817|AMELX_BOVIN Amelogenin, X isoform OS=Bos taurus OX=9913 GN=AMELX PE=1 SV=2	1	hf1_10472_ebo_36_1_261219.ScanId;v=1;d1=24389.24389.3	controllerType=0 controllerNumber=1 scan=24389	52.5049
32486:4	1	S.MP[+15.995]LPPHPGHPGY[+15.995]INFS[+79.966]YEVLTPLKWY.Q		P[+16], S[+80], Y[+16]	792.134	4	3165.51	3165.49	0	5.8	17	Non	268.2	268.2	5.82	5.55	1509	>sp|P02817|AMELX_BOVIN Amelogenin, X isoform OS=Bos taurus OX=9913 GN=AMELX PE=1 SV=2	1	hf1_10472_ebo_36_1_261219.ScanId;v=1;d1=24252.24252.4	controllerType=0 controllerNumber=1 scan=24252	52.2517
34931:4	1	S.MP[+15.995]LPPHPGHPGYINF[+31.990]SY[+31.990]EVLTPLKWY.Q		F[+32], P[+16], Y[+32]	784.131	4	3133.5	3133.51	0	-3.5	17	Non	269.87	269.87	5.8	4.36	1509	>sp|P02817|AMELX_BOVIN Amelogenin, X isoform OS=Bos taurus OX=9913 GN=AMELX PE=1 SV=2	1	hf1_10472_ebo_36_1_261219.ScanId;v=1;d1=25835.25835.4	controllerType=0 controllerNumber=1 scan=25835	55.1722
33619:3	1	S.MP[+15.995]LPPHPGHPGYINFS[+79.966]Y[+15.995]EVLTPLKWY.Q		P[+16], S[+80], Y[+16]	1055.84	3	3165.51	3165.49	0	5.7	17	Non	271.38	271.38	4	5.79	1509	>sp|P02817|AMELX_BOVIN Amelogenin, X isoform OS=Bos taurus OX=9913 GN=AMELX PE=1 SV=2	1	hf1_10472_ebo_36_1_261219.ScanId;v=1;d1=24998.24998.3	controllerType=0 controllerNumber=1 scan=24998	53.6305
33823:4	1	S.MP[+15.995]LPPHPGHPGYIN[+0.984]FS[+79.966]YEVLTPLKWY.Q		N[+1], P[+16], S[+80]	788.382	4	3150.51	3150.48	0	7.5	17	Non	281.73	281.73	4	5.64	1509	>sp|P02817|AMELX_BOVIN Amelogenin, X isoform OS=Bos taurus OX=9913 GN=AMELX PE=1 SV=2	1	hf1_10472_ebo_36_1_261219.ScanId;v=1;d1=25129.25129.4	controllerType=0 controllerNumber=1 scan=25129	53.8772
31037:4	1	S.MP[+15.995]LPPHPGHPGYINFS[+79.966]YEVLTPLKW[+15.995]Y.Q		P[+16], S[+80], W[+16]	792.133	4	3165.51	3165.49	0	4.7	17	Non	283.69	283.69	5.8	5.72	1509	>sp|P02817|AMELX_BOVIN Amelogenin, X isoform OS=Bos taurus OX=9913 GN=AMELX PE=1 SV=2	1	hf1_10472_ebo_36_1_261219.ScanId;v=1;d1=23306.23306.4	controllerType=0 controllerNumber=1 scan=23306	50.5275
34630:4	1	S.MPLPP[+15.995]HPGHPGYINF[+31.990]SY[+31.990]EVLTPLKWY.Q		F[+32], P[+16], Y[+32]	784.134	4	3133.51	3133.51	0	0.7	17	Non	297.51	297.51	0	4.99	1509	>sp|P02817|AMELX_BOVIN Amelogenin, X isoform OS=Bos taurus OX=9913 GN=AMELX PE=1 SV=2	1	hf1_10472_ebo_36_1_261219.ScanId;v=1;d1=25644.25644.4	controllerType=0 controllerNumber=1 scan=25644	54.8191
32769:4	1	S.MP[+15.995]LPPHPGHPGY[+15.995]INFS[+79.966]YEVLTPLKWY.Q		P[+16], S[+80], Y[+16]	792.132	4	3165.51	3165.49	0	3.5	17	Non	315.97	315.97	13.6	5.2	1509	>sp|P02817|AMELX_BOVIN Amelogenin, X isoform OS=Bos taurus OX=9913 GN=AMELX PE=1 SV=2	1	hf1_10472_ebo_36_1_261219.ScanId;v=1;d1=24436.24436.4	controllerType=0 controllerNumber=1 scan=24436	52.5958
33323:3	1	S.MP[+15.995]LPPHP[+15.995]GHPGYINFS[+79.966]YEVLTPLKWY.Q		P[+16]*2, S[+80]	1055.84	3	3165.51	3165.49	0	5.1	17	Non	323.25	323.25	4	6.12	1509	>sp|P02817|AMELX_BOVIN Amelogenin, X isoform OS=Bos taurus OX=9913 GN=AMELX PE=1 SV=2	1	hf1_10472_ebo_36_1_261219.ScanId;v=1;d1=24810.24810.3	controllerType=0 controllerNumber=1 scan=24810	53.2883
31839:3	1	S.MP[+15.995]LPPHPGHPGYINFS[+79.966]YEVLTPLKW[+15.995]Y.Q		P[+16], S[+80], W[+16]	1055.84	3	3165.52	3165.49	0	7.3	17	Non	354.94	354.94	0	6.04	1509	>sp|P02817|AMELX_BOVIN Amelogenin, X isoform OS=Bos taurus OX=9913 GN=AMELX PE=1 SV=2	1	hf1_10472_ebo_36_1_261219.ScanId;v=1;d1=23837.23837.3	controllerType=0 controllerNumber=1 scan=23837	51.4868
32772:3	1	S.M[+15.995]PLPPHPGHPGYINFS[+79.966]Y[+15.995]EVLTPLKWY.Q		M[+16], S[+80], Y[+16]	1055.84	3	3165.51	3165.49	0	5.8	17	Non	370.39	370.39	3.73	7.03	1509	>sp|P02817|AMELX_BOVIN Amelogenin, X isoform OS=Bos taurus OX=9913 GN=AMELX PE=1 SV=2	1	hf1_10472_ebo_36_1_261219.ScanId;v=1;d1=24438.24438.3	controllerType=0 controllerNumber=1 scan=24438	52.5989
33049:3	1	S.MP[+15.995]LPPHPGHP[+15.995]GYINFS[+79.966]YEVLTPLKWY.Q		P[+16]*2, S[+80]	1055.84	3	3165.5	3165.49	0	0.7	17	Non	372.27	372.27	4	6.29	1509	>sp|P02817|AMELX_BOVIN Amelogenin, X isoform OS=Bos taurus OX=9913 GN=AMELX PE=1 SV=2	1	hf1_10472_ebo_36_1_261219.ScanId;v=1;d1=24624.24624.3	controllerType=0 controllerNumber=1 scan=24624	52.943
32147:3	1	S.MP[+15.995]LPPHPGHPGYINFS[+79.966]YEVLTPLKW[+15.995]Y.Q		P[+16], S[+80], W[+16]	1055.84	3	3165.52	3165.49	0	7.9	17	Non	409.09	409.09	0	7.19	1509	>sp|P02817|AMELX_BOVIN Amelogenin, X isoform OS=Bos taurus OX=9913 GN=AMELX PE=1 SV=2	1	hf1_10472_ebo_36_1_261219.ScanId;v=1;d1=24029.24029.3	controllerType=0 controllerNumber=1 scan=24029	51.8403
31757:3	1	S.M[+15.995]PLPPHPGHPGYINFS[+79.966]YEVLTPLKWY[+31.990].Q		M[+16], S[+80], Y[+32]	1061.17	3	3181.49	3181.49	0	1.7	17	Non	435.93	435.93	0	6.53	1509	>sp|P02817|AMELX_BOVIN Amelogenin, X isoform OS=Bos taurus OX=9913 GN=AMELX PE=1 SV=2	1	hf1_10472_ebo_36_1_261219.ScanId;v=1;d1=23782.23782.3	controllerType=0 controllerNumber=1 scan=23782	51.3871
30003:3	1	S.MP[+15.995]LPPHPGHPGYINFS[+79.966]YEVLTPLKW[+15.995]Y.Q		P[+16], S[+80], W[+16]	1055.84	3	3165.51	3165.49	0	4.5	17	Non	460.33	460.33	0	7.29	1509	>sp|P02817|AMELX_BOVIN Amelogenin, X isoform OS=Bos taurus OX=9913 GN=AMELX PE=1 SV=2	1	hf1_10472_ebo_36_1_261219.ScanId;v=1;d1=22632.22632.3	controllerType=0 controllerNumber=1 scan=22632	49.3068
32442:3	1	S.MP[+15.995]LPPHPGHPGYINF[+15.995]S[+79.966]YEVLTPLKWY.Q		F[+16], P[+16], S[+80]	1055.84	3	3165.52	3165.49	0	6.7	17	Non	496.38	496.38	1.15	7.25	1509	>sp|P02817|AMELX_BOVIN Amelogenin, X isoform OS=Bos taurus OX=9913 GN=AMELX PE=1 SV=2	1	hf1_10472_ebo_36_1_261219.ScanId;v=1;d1=24223.24223.3	controllerType=0 controllerNumber=1 scan=24223	52.1964
33462:3	1	S.MP[+15.995]LPPHPGHPGYIN[+0.984]FS[+79.966]YEVLTPLKWY.Q		N[+1], P[+16], S[+80]	1050.84	3	3150.51	3150.48	0	8.7	17	Non	615.46	615.46	5.8	9.17	1509	>sp|P02817|AMELX_BOVIN Amelogenin, X isoform OS=Bos taurus OX=9913 GN=AMELX PE=1 SV=2	1	hf1_10472_ebo_36_1_261219.ScanId;v=1;d1=24896.24896.3	controllerType=0 controllerNumber=1 scan=24896	53.4472
31252:3	1	S.MP[+15.995]LPPHPGHPGYINFS[+79.966]YEVLTPLKW[+15.995]Y.Q		P[+16], S[+80], W[+16]	1055.84	3	3165.51	3165.49	0	5.1	17	Non	745.11	745.11	0	11.89	1509	>sp|P02817|AMELX_BOVIN Amelogenin, X isoform OS=Bos taurus OX=9913 GN=AMELX PE=1 SV=2	1	hf1_10472_ebo_36_1_261219.ScanId;v=1;d1=23450.23450.3	controllerType=0 controllerNumber=1 scan=23450	50.7841
33753:3	1	S.M[+15.995]PLPPHPGHPGYIN[+0.984]FS[+79.966]YEVLTPLKWY.Q		M[+16], N[+1], S[+80]	1050.84	3	3150.51	3150.48	0	7.2	17	Non	862.47	862.47	21.27	14.82	1509	>sp|P02817|AMELX_BOVIN Amelogenin, X isoform OS=Bos taurus OX=9913 GN=AMELX PE=1 SV=2	1	hf1_10472_ebo_36_1_261219.ScanId;v=1;d1=25083.25083.3	controllerType=0 controllerNumber=1 scan=25083	53.7904
40389:3	1	S.MP[+15.995]LPPHPGHP[+31.990]GY[+31.990]INFSY[+15.995]EVLTPLKWY.Q		P[+16][+32], Y[+16][+32]	1050.51	3	3149.52	3149.51	0	5	17	Non	18.87	18.87	0	2.23	1509	>sp|P02817|AMELX_BOVIN Amelogenin, X isoform OS=Bos taurus OX=9913 GN=AMELX PE=1 SV=2	1	hf1_10472_ebo_36_1_261219.ScanId;v=1;d1=29263.29263.3	controllerType=0 controllerNumber=1 scan=29263	61.3376
35079:4	1	S.MP[+15.995]LPPHP[+31.990]GHPGYINF[+15.995]SY[+31.990]EVLTPLKWY.Q		F[+16], P[+16][+32], Y[+32]	788.132	4	3149.5	3149.51	0	-0.9	17	Non	63.6	63.6	4	2.2	1509	>sp|P02817|AMELX_BOVIN Amelogenin, X isoform OS=Bos taurus OX=9913 GN=AMELX PE=1 SV=2	1	hf1_10472_ebo_36_1_261219.ScanId;v=1;d1=25929.25929.4	controllerType=0 controllerNumber=1 scan=25929	55.3435
34732:4	1	S.MP[+15.995]LPPHPGHPGY[+15.995]INF[+31.990]SY[+31.990]EVLTPLKWY.Q		F[+32], P[+16], Y[+16][+32]	788.135	4	3149.52	3149.51	0	2.7	17	Non	102.98	102.98	11.76	2.21	1509	>sp|P02817|AMELX_BOVIN Amelogenin, X isoform OS=Bos taurus OX=9913 GN=AMELX PE=1 SV=2	1	hf1_10472_ebo_36_1_261219.ScanId;v=1;d1=25709.25709.4	controllerType=0 controllerNumber=1 scan=25709	54.9408
31365:4	1	S.MP[+15.995]LPPHPGHPGYINF[+31.990]SY[+31.990]EVLTPLKW[+15.995]Y.Q		F[+32], P[+16], W[+16], Y[+32]	788.134	4	3149.51	3149.51	0	2.1	17	Non	123.91	123.91	5.8	2.22	1509	>sp|P02817|AMELX_BOVIN Amelogenin, X isoform OS=Bos taurus OX=9913 GN=AMELX PE=1 SV=2	1	hf1_10472_ebo_36_1_261219.ScanId;v=1;d1=23521.23521.4	controllerType=0 controllerNumber=1 scan=23521	50.9082
38045:3	1	S.M[+15.995]PLPPHPGHP[+31.990]GY[+31.990]INFSY[+15.995]EVLTPLKWY.Q		M[+16], P[+32], Y[+16][+32]	1050.5	3	3149.5	3149.51	0	-3.7	17	Non	147.11	147.11	0	2.32	1509	>sp|P02817|AMELX_BOVIN Amelogenin, X isoform OS=Bos taurus OX=9913 GN=AMELX PE=1 SV=2	1	hf1_10472_ebo_36_1_261219.ScanId;v=1;d1=27784.27784.5	controllerType=0 controllerNumber=1 scan=27784	58.6779
35032:4	1	S.MP[+15.995]LPPHP[+31.990]GHP[+15.995]GYINF[+31.990]SYEVLTPLKWY.Q		F[+32], P[+16]*2[+32]	788.133	4	3149.51	3149.51	0	0.3	17	Non	161.45	161.45	2	3.04	1509	>sp|P02817|AMELX_BOVIN Amelogenin, X isoform OS=Bos taurus OX=9913 GN=AMELX PE=1 SV=2	1	hf1_10472_ebo_36_1_261219.ScanId;v=1;d1=25900.25900.4	controllerType=0 controllerNumber=1 scan=25900	55.291
34434:4	1	S.MP[+15.995]LPPHPGHP[+15.995]GYINF[+31.990]SY[+31.990]EVLTPLKWY.Q		F[+32], P[+16]*2, Y[+32]	788.132	4	3149.51	3149.51	0	-0.2	17	Non	166.96	166.96	0	2.99	1509	>sp|P02817|AMELX_BOVIN Amelogenin, X isoform OS=Bos taurus OX=9913 GN=AMELX PE=1 SV=2	1	hf1_10472_ebo_36_1_261219.ScanId;v=1;d1=25522.25522.4	controllerType=0 controllerNumber=1 scan=25522	54.5966
35231:4	1	S.MPLPPHPGHPGY[+15.995]IN[+0.984]F[+31.990]SY[+31.990]EVLTPLKWY.Q		F[+32], N[+1], Y[+16][+32]	784.382	4	3134.51	3134.5	0	2.7	17	Non	188.32	188.32	10.31	3.66	1509	>sp|P02817|AMELX_BOVIN Amelogenin, X isoform OS=Bos taurus OX=9913 GN=AMELX PE=1 SV=2	1	hf1_10472_ebo_36_1_261219.ScanId;v=1;d1=26026.26026.4	controllerType=0 controllerNumber=1 scan=26026	55.5219
31144:4	1	S.MP[+15.995]LPPHPGHPGYINFSYEVLTPLKWYQ.S		P[+16]	800.154	4	3197.59	3197.59	0	0.6	17	Non	263.27	250.06	4	4.81	1509	>sp|P02817|AMELX_BOVIN Amelogenin, X isoform OS=Bos taurus OX=9913 GN=AMELX PE=1 SV=2	1	hf1_10472_ebo_36_1_261219.ScanId;v=1;d1=23374.23374.4	controllerType=0 controllerNumber=1 scan=23374	50.6473
30125:4	1	S.MP[+15.995]LPPHPGHPGYINFSYEVLTPLKWYQ.S		P[+16]	800.156	4	3197.6	3197.59	0	3.7	17	Non	318.88	318.88	4	5.42	1509	>sp|P02817|AMELX_BOVIN Amelogenin, X isoform OS=Bos taurus OX=9913 GN=AMELX PE=1 SV=2	1	hf1_10472_ebo_36_1_261219.ScanId;v=1;d1=22712.22712.4	controllerType=0 controllerNumber=1 scan=22712	49.4534
29957:3	1	S.MP[+15.995]LPPHPGHPGYINFSYEVLTPLKWYQ.S		P[+16]	1066.54	3	3197.61	3197.59	0	4.4	17	Non	450.35	450.35	4	7.43	1509	>sp|P02817|AMELX_BOVIN Amelogenin, X isoform OS=Bos taurus OX=9913 GN=AMELX PE=1 SV=2	1	hf1_10472_ebo_36_1_261219.ScanId;v=1;d1=22602.22602.3	controllerType=0 controllerNumber=1 scan=22602	49.2529
31930:4	1	S.MP[+15.995]LPPHPGHPGYINFS[+79.966]YEVLTPLKWYQ.S		P[+16], S[+80]	820.15	4	3277.58	3277.56	0	5.6	17	Non	290.62	290.62	4	5.72	1509	>sp|P02817|AMELX_BOVIN Amelogenin, X isoform OS=Bos taurus OX=9913 GN=AMELX PE=1 SV=2	1	hf1_10472_ebo_36_1_261219.ScanId;v=1;d1=23893.23893.4	controllerType=0 controllerNumber=1 scan=23893	51.5912
31361:4	1	S.MP[+15.995]LPPHPGHPGYINFS[+79.966]YEVLTPLKWYQ.S		P[+16], S[+80]	820.149	4	3277.58	3277.56	0	5.4	17	Non	307.92	307.92	4	5.72	1509	>sp|P02817|AMELX_BOVIN Amelogenin, X isoform OS=Bos taurus OX=9913 GN=AMELX PE=1 SV=2	1	hf1_10472_ebo_36_1_261219.ScanId;v=1;d1=23518.23518.4	controllerType=0 controllerNumber=1 scan=23518	50.9037
31641:4	1	S.MP[+15.995]LPPHPGHPGYINFS[+79.966]YEVLTPLKWYQ.S		P[+16], S[+80]	820.148	4	3277.57	3277.56	0	3.7	17	Non	321.47	321.47	4	5.58	1509	>sp|P02817|AMELX_BOVIN Amelogenin, X isoform OS=Bos taurus OX=9913 GN=AMELX PE=1 SV=2	1	hf1_10472_ebo_36_1_261219.ScanId;v=1;d1=23704.23704.4	controllerType=0 controllerNumber=1 scan=23704	51.2454
30423:4	1	S.MP[+15.995]LPPHPGHPGYINFSYEVLTPLKWYQ[+0.984].S		P[+16], Q[+1]	800.403	4	3198.59	3198.58	0	3.9	17	Non	338.66	255.72	4	5.36	1509	>sp|P02817|AMELX_BOVIN Amelogenin, X isoform OS=Bos taurus OX=9913 GN=AMELX PE=1 SV=2	1	hf1_10472_ebo_36_1_261219.ScanId;v=1;d1=22907.22907.4	controllerType=0 controllerNumber=1 scan=22907	49.8071
31943:3	1	S.M[+15.995]PLPPHPGHPGYINFS[+79.966]YEVLTPLKWYQ.S		M[+16], S[+80]	1093.2	3	3277.58	3277.56	0	6.1	17	Non	764.47	764.47	0.74	12.89	1509	>sp|P02817|AMELX_BOVIN Amelogenin, X isoform OS=Bos taurus OX=9913 GN=AMELX PE=1 SV=2	1	hf1_10472_ebo_36_1_261219.ScanId;v=1;d1=23901.23901.3	controllerType=0 controllerNumber=1 scan=23901	51.6062
31362:3	1	S.M[+15.995]PLPPHPGHPGYINFS[+79.966]YEVLTPLKWYQ.S		M[+16], S[+80]	1093.2	3	3277.59	3277.56	0	9.9	17	Non	768.66	768.66	15.66	12.17	1509	>sp|P02817|AMELX_BOVIN Amelogenin, X isoform OS=Bos taurus OX=9913 GN=AMELX PE=1 SV=2	1	hf1_10472_ebo_36_1_261219.ScanId;v=1;d1=23519.23519.3	controllerType=0 controllerNumber=1 scan=23519	50.9052
31642:3	1	S.M[+15.995]PLPPHPGHPGYINFS[+79.966]YEVLTPLKWYQ.S		M[+16], S[+80]	1093.2	3	3277.57	3277.56	0	4.9	17	Non	1070.6	1070.6	27.5	18.89	1509	>sp|P02817|AMELX_BOVIN Amelogenin, X isoform OS=Bos taurus OX=9913 GN=AMELX PE=1 SV=2	1	hf1_10472_ebo_36_1_261219.ScanId;v=1;d1=23705.23705.3	controllerType=0 controllerNumber=1 scan=23705	51.2469
29865:4	1	S.MP[+15.995]LPPHPGHPGYINFS[+79.966]YEVLTPLKW[+15.995]YQ.S		P[+16], S[+80], W[+16]	824.149	4	3293.58	3293.55	0	6.8	17	Non	110.12	110.12	0	2.24	1509	>sp|P02817|AMELX_BOVIN Amelogenin, X isoform OS=Bos taurus OX=9913 GN=AMELX PE=1 SV=2	1	hf1_10472_ebo_36_1_261219.ScanId;v=1;d1=22543.22543.5	controllerType=0 controllerNumber=1 scan=22543	49.1498
32048:4	1	S.MP[+15.995]LPPHPGHP[+15.995]GYINFS[+79.966]YEVLTPLKWYQ.S		P[+16]*2, S[+80]	824.15	4	3293.58	3293.55	0	7.5	17	Non	113.55	113.55	4	2.24	1509	>sp|P02817|AMELX_BOVIN Amelogenin, X isoform OS=Bos taurus OX=9913 GN=AMELX PE=1 SV=2	1	hf1_10472_ebo_36_1_261219.ScanId;v=1;d1=23966.23966.4	controllerType=0 controllerNumber=1 scan=23966	51.7218
33286:4	1	S.MP[+15.995]LPPHPGHPGYINFS[+79.966]YEVLTPLKWYQ[+0.984].S		P[+16], Q[+1], S[+80]	820.395	4	3278.56	3278.54	0	5	17	Non	134.27	130.59	4	2.31	1509	>sp|P02817|AMELX_BOVIN Amelogenin, X isoform OS=Bos taurus OX=9913 GN=AMELX PE=1 SV=2	1	hf1_10472_ebo_36_1_261219.ScanId;v=1;d1=24786.24786.4	controllerType=0 controllerNumber=1 scan=24786	53.2433
32738:4	1	S.MP[+15.995]LPPHPGHPGYIN[+0.984]FS[+79.966]YEVLTPLKWYQ.S		N[+1], P[+16], S[+80]	820.396	4	3278.56	3278.54	0	6.4	17	Non	137.04	137.04	4	2.73	1509	>sp|P02817|AMELX_BOVIN Amelogenin, X isoform OS=Bos taurus OX=9913 GN=AMELX PE=1 SV=2	1	hf1_10472_ebo_36_1_261219.ScanId;v=1;d1=24416.24416.4	controllerType=0 controllerNumber=1 scan=24416	52.5571
32037:3	1	S.MP[+15.995]LPPHPGHP[+15.995]GYINFS[+79.966]YEVLTPLKWYQ.S		P[+16]*2, S[+80]	1098.53	3	3293.57	3293.55	0	5.5	17	Non	155	155	4	2.98	1509	>sp|P02817|AMELX_BOVIN Amelogenin, X isoform OS=Bos taurus OX=9913 GN=AMELX PE=1 SV=2	1	hf1_10472_ebo_36_1_261219.ScanId;v=1;d1=23958.23958.3	controllerType=0 controllerNumber=1 scan=23958	51.7069
30078:4	1	S.MP[+15.995]LPPHPGHPGYINFS[+79.966]YEVLTPLKW[+15.995]YQ.S		P[+16], S[+80], W[+16]	824.151	4	3293.58	3293.55	0	8.6	17	Non	238.24	238.24	4	3.09	1509	>sp|P02817|AMELX_BOVIN Amelogenin, X isoform OS=Bos taurus OX=9913 GN=AMELX PE=1 SV=2	1	hf1_10472_ebo_36_1_261219.ScanId;v=1;d1=22684.22684.4	controllerType=0 controllerNumber=1 scan=22684	49.4026
31722:3	1	S.M[+15.995]PLPPHPGHPGYINFS[+79.966]YEVLTPLK[+15.995]WYQ.S		K[+16], M[+16], S[+80]	1098.53	3	3293.57	3293.55	0	6	17	Non	268.42	268.42	0	5.79	1509	>sp|P02817|AMELX_BOVIN Amelogenin, X isoform OS=Bos taurus OX=9913 GN=AMELX PE=1 SV=2	1	hf1_10472_ebo_36_1_261219.ScanId;v=1;d1=23758.23758.3	controllerType=0 controllerNumber=1 scan=23758	51.3434
32238:4	1	S.MP[+15.995]LPPHPGHPGYINFS[+79.966]YEVLTPLKWYQ[+0.984].S		P[+16], Q[+1], S[+80]	820.397	4	3278.57	3278.54	0	7.9	17	Non	290.94	290.94	4	5.64	1509	>sp|P02817|AMELX_BOVIN Amelogenin, X isoform OS=Bos taurus OX=9913 GN=AMELX PE=1 SV=2	1	hf1_10472_ebo_36_1_261219.ScanId;v=1;d1=24084.24084.4	controllerType=0 controllerNumber=1 scan=24084	51.9377
31126:3	1	S.MP[+15.995]LPPHPGHPGYINFS[+79.966]Y[+15.995]EVLTPLKWYQ.S		P[+16], S[+80], Y[+16]	1098.53	3	3293.57	3293.55	0	6.1	17	Non	395.47	395.47	5.8	7.25	1509	>sp|P02817|AMELX_BOVIN Amelogenin, X isoform OS=Bos taurus OX=9913 GN=AMELX PE=1 SV=2	1	hf1_10472_ebo_36_1_261219.ScanId;v=1;d1=23363.23363.3	controllerType=0 controllerNumber=1 scan=23363	50.6279
32810:3	1	S.MP[+15.995]LPPHPGHPGYIN[+0.984]FS[+79.966]YEVLTPLKWYQ.S		N[+1], P[+16], S[+80]	1093.53	3	3278.57	3278.54	0	7.2	17	Non	494.54	459.24	4	7.31	1509	>sp|P02817|AMELX_BOVIN Amelogenin, X isoform OS=Bos taurus OX=9913 GN=AMELX PE=1 SV=2	1	hf1_10472_ebo_36_1_261219.ScanId;v=1;d1=24465.24465.3	controllerType=0 controllerNumber=1 scan=24465	52.6483
32523:3	1	S.M[+15.995]PLPPHPGHPGYIN[+0.984]FS[+79.966]YEVLTPLKWYQ.S		M[+16], N[+1], S[+80]	1093.53	3	3278.57	3278.54	0	7	17	Non	943.85	831.26	25.77	15.82	1509	>sp|P02817|AMELX_BOVIN Amelogenin, X isoform OS=Bos taurus OX=9913 GN=AMELX PE=1 SV=2	1	hf1_10472_ebo_36_1_261219.ScanId;v=1;d1=24274.24274.3	controllerType=0 controllerNumber=1 scan=24274	52.2906
32248:3	1	S.M[+15.995]PLPPHPGHPGYINFS[+79.966]YEVLTPLKWYQ[+0.984].S		M[+16], Q[+1], S[+80]	1093.53	3	3278.57	3278.54	0	7.2	17	Non	974.32	798.64	17.61	16.82	1509	>sp|P02817|AMELX_BOVIN Amelogenin, X isoform OS=Bos taurus OX=9913 GN=AMELX PE=1 SV=2	1	hf1_10472_ebo_36_1_261219.ScanId;v=1;d1=24091.24091.3	controllerType=0 controllerNumber=1 scan=24091	51.9511
45304:4	1	S.MP[+15.995]LPPHPGHP[+31.990]GY[+31.990]INFSY[+15.995]EVLTPLKWYQ.S		P[+16][+32], Y[+16][+32]	820.151	4	3277.58	3277.57	0	5	17	Non	135.36	135.36	0	2.31	1509	>sp|P02817|AMELX_BOVIN Amelogenin, X isoform OS=Bos taurus OX=9913 GN=AMELX PE=1 SV=2	1	hf1_10472_ebo_36_1_261219.ScanId;v=1;d1=33702.33702.4	controllerType=0 controllerNumber=1 scan=33702	73.5837
29620:3	1	S.M[+15.995]PLPPHPGHPGYINFSYEVLTPLKWYQS.M		M[+16]	1095.55	3	3284.62	3284.62	0	0.3	17	Non	97.91	29.46	9.34	2.21	1509	>sp|P02817|AMELX_BOVIN Amelogenin, X isoform OS=Bos taurus OX=9913 GN=AMELX PE=1 SV=2	1	hf1_10472_ebo_36_1_261219.ScanId;v=1;d1=22388.22388.3	controllerType=0 controllerNumber=1 scan=22388	48.8726
32696:4	1	S.MPLPPHPGHPGYINFS[+79.966]YEVLTPLKWYQS.M		S[+80]	837.909	4	3348.62	3348.6	0	6	17	Non	190.72	190.72	1.21	3.72	1509	>sp|P02817|AMELX_BOVIN Amelogenin, X isoform OS=Bos taurus OX=9913 GN=AMELX PE=1 SV=2	1	hf1_10472_ebo_36_1_261219.ScanId;v=1;d1=24387.24387.4	controllerType=0 controllerNumber=1 scan=24387	52.5018
29758:4	1	S.MP[+15.995]LPPHPGHPGYINFSYEVLTPLKWYQS.M		P[+16]	821.916	4	3284.64	3284.62	0	5.8	17	Non	353.36	335.31	4	6.1	1509	>sp|P02817|AMELX_BOVIN Amelogenin, X isoform OS=Bos taurus OX=9913 GN=AMELX PE=1 SV=2	1	hf1_10472_ebo_36_1_261219.ScanId;v=1;d1=22475.22475.4	controllerType=0 controllerNumber=1 scan=22475	49.027
31191:4	1	S.MP[+15.995]LPPHPGHPGYINFS[+79.966]YEVLTPLKWYQS.M		P[+16], S[+80]	841.908	4	3364.61	3364.59	0	5.7	17	Non	219.55	219.55	4	4.22	1509	>sp|P02817|AMELX_BOVIN Amelogenin, X isoform OS=Bos taurus OX=9913 GN=AMELX PE=1 SV=2	1	hf1_10472_ebo_36_1_261219.ScanId;v=1;d1=23409.23409.4	controllerType=0 controllerNumber=1 scan=23409	50.7109
31494:4	1	S.MP[+15.995]LPPHPGHPGYINFS[+79.966]YEVLTPLKWYQS.M		P[+16], S[+80]	841.907	4	3364.6	3364.59	0	4.3	17	Non	343.33	343.33	4	6.1	1509	>sp|P02817|AMELX_BOVIN Amelogenin, X isoform OS=Bos taurus OX=9913 GN=AMELX PE=1 SV=2	1	hf1_10472_ebo_36_1_261219.ScanId;v=1;d1=23605.23605.4	controllerType=0 controllerNumber=1 scan=23605	51.0631
31770:3	1	S.M[+15.995]PLPPHPGHPGYINFS[+79.966]YEVLTPLKWYQS.M		M[+16], S[+80]	1122.21	3	3364.61	3364.59	0	7.3	17	Non	370.82	370.82	6.83	6.95	1509	>sp|P02817|AMELX_BOVIN Amelogenin, X isoform OS=Bos taurus OX=9913 GN=AMELX PE=1 SV=2	1	hf1_10472_ebo_36_1_261219.ScanId;v=1;d1=23792.23792.3	controllerType=0 controllerNumber=1 scan=23792	51.4047
30146:4	1	S.MP[+15.995]LPPHPGHPGYINFSYEVLTPLKWYQ[+0.984]S.M		P[+16], Q[+1]	822.163	4	3285.63	3285.61	0	7.2	17	Non	371.15	343.15	4	5.85	1509	>sp|P02817|AMELX_BOVIN Amelogenin, X isoform OS=Bos taurus OX=9913 GN=AMELX PE=1 SV=2	1	hf1_10472_ebo_36_1_261219.ScanId;v=1;d1=22726.22726.4	controllerType=0 controllerNumber=1 scan=22726	49.4774
31479:3	1	S.M[+15.995]PLPPHPGHPGYINFS[+79.966]YEVLTPLKWYQS.M		M[+16], S[+80]	1122.21	3	3364.61	3364.59	0	5.5	17	Non	1000.34	1000.34	12.85	17.89	1509	>sp|P02817|AMELX_BOVIN Amelogenin, X isoform OS=Bos taurus OX=9913 GN=AMELX PE=1 SV=2	1	hf1_10472_ebo_36_1_261219.ScanId;v=1;d1=23595.23595.3	controllerType=0 controllerNumber=1 scan=23595	51.0452
35941:3	1	S.MP[+15.995]LPPHPGHP[+31.990]GYINFSYEVLTPLKWY[+15.995]QS.M		P[+16][+32], Y[+16]	1111.55	3	3332.63	3332.61	0	5.8	17	Non	2.4	2.4	0	1.09	1509	>sp|P02817|AMELX_BOVIN Amelogenin, X isoform OS=Bos taurus OX=9913 GN=AMELX PE=1 SV=2	1	hf1_10472_ebo_36_1_261219.ScanId;v=1;d1=26479.26479.3	controllerType=0 controllerNumber=1 scan=26479	56.3365
32633:3	1	S.MP[+15.995]LPPHPGHPGYINF[+31.990]SY[+31.990]EVLTPLKWYQS.M		F[+32], P[+16], Y[+32]	1116.88	3	3348.62	3348.6	0	5.4	17	Non	29.93	29.93	4	1.09	1509	>sp|P02817|AMELX_BOVIN Amelogenin, X isoform OS=Bos taurus OX=9913 GN=AMELX PE=1 SV=2	1	hf1_10472_ebo_36_1_261219.ScanId;v=1;d1=24346.24346.3	controllerType=0 controllerNumber=1 scan=24346	52.4224
31673:3	1	S.MP[+31.990]LPPHPGHPGYIN[+0.984]FS[+79.966]YEVLTPLKWYQS.M		N[+1], P[+32], S[+80]	1127.87	3	3381.59	3381.57	0	5.2	17	Non	49.53	19.88	0.46	1.09	1509	>sp|P02817|AMELX_BOVIN Amelogenin, X isoform OS=Bos taurus OX=9913 GN=AMELX PE=1 SV=2	1	hf1_10472_ebo_36_1_261219.ScanId;v=1;d1=23728.23728.3	controllerType=0 controllerNumber=1 scan=23728	51.2897
34241:3	1	S.MP[+15.995]LPPHPGHPGYINFSY[+31.990]EVLTPLKW[+15.995]YQS.M		P[+16], W[+16], Y[+32]	1111.54	3	3332.61	3332.61	0	1.9	17	Non	59.85	59.85	0	2.21	1509	>sp|P02817|AMELX_BOVIN Amelogenin, X isoform OS=Bos taurus OX=9913 GN=AMELX PE=1 SV=2	1	hf1_10472_ebo_36_1_261219.ScanId;v=1;d1=25395.25395.3	controllerType=0 controllerNumber=1 scan=25395	54.3637
30341:3	1	S.MP[+15.995]LPPHPGHPGYINFSY[+31.990]EVLTP[+15.995]LKWYQS.M		P[+16]*2, Y[+32]	1111.54	3	3332.61	3332.61	0	-0.8	17	Non	85.26	85.26	4	2.21	1509	>sp|P02817|AMELX_BOVIN Amelogenin, X isoform OS=Bos taurus OX=9913 GN=AMELX PE=1 SV=2	1	hf1_10472_ebo_36_1_261219.ScanId;v=1;d1=22854.22854.3	controllerType=0 controllerNumber=1 scan=22854	49.7132
32921:4	1	S.M[+15.995]PLPPHPGHP[+31.990]GYINFSY[+31.990]EVLTPLKWYQS.M		M[+16], P[+32], Y[+32]	837.91	4	3348.62	3348.6	0	4.5	17	Non	93.81	43.55	0.29	2.23	1509	>sp|P02817|AMELX_BOVIN Amelogenin, X isoform OS=Bos taurus OX=9913 GN=AMELX PE=1 SV=2	1	hf1_10472_ebo_36_1_261219.ScanId;v=1;d1=24541.24541.4	controllerType=0 controllerNumber=1 scan=24541	52.7888
34170:3	1	S.MPLPPHPGHPGYIN[+0.984]FS[+79.966]YEVLTPLKWYQ[+0.984]S.M		N[+1], Q[+1], S[+80]	1117.53	3	3350.58	3350.56	0	6.3	17	Non	96.25	29.71	10.15	0.98	1509	>sp|P02817|AMELX_BOVIN Amelogenin, X isoform OS=Bos taurus OX=9913 GN=AMELX PE=1 SV=2	1	hf1_10472_ebo_36_1_261219.ScanId;v=1;d1=25353.25353.3	controllerType=0 controllerNumber=1 scan=25353	54.2886
30179:3	1	S.MP[+15.995]LPPHPGHPGYINFS[+79.966]YEVLTPLKWY[+31.990]QS.M		P[+16], S[+80], Y[+32]	1132.87	3	3396.58	3396.58	0	0.7	17	Non	111.41	111.41	0	2.33	1509	>sp|P02817|AMELX_BOVIN Amelogenin, X isoform OS=Bos taurus OX=9913 GN=AMELX PE=1 SV=2	1	hf1_10472_ebo_36_1_261219.ScanId;v=1;d1=22747.22747.3	controllerType=0 controllerNumber=1 scan=22747	49.5148
28397:4	1	S.MP[+15.995]LPPHPGHPGYINFS[+79.966]YEVLTP[+31.990]LKWYQS.M		P[+16][+32], S[+80]	849.904	4	3396.59	3396.58	0	4.2	17	Non	112.22	112.22	4	2.21	1509	>sp|P02817|AMELX_BOVIN Amelogenin, X isoform OS=Bos taurus OX=9913 GN=AMELX PE=1 SV=2	1	hf1_10472_ebo_36_1_261219.ScanId;v=1;d1=21625.21625.4	controllerType=0 controllerNumber=1 scan=21625	47.4981
33202:4	1	S.M[+15.995]PLPP[+31.990]HP[+31.990]GHPGYINFSYEVLTPLKWYQS.M		M[+16], P[+32]*2	837.909	4	3348.61	3348.6	0	3.3	17	Non	113.88	16.07	1.83	2.21	1509	>sp|P02817|AMELX_BOVIN Amelogenin, X isoform OS=Bos taurus OX=9913 GN=AMELX PE=1 SV=2	1	hf1_10472_ebo_36_1_261219.ScanId;v=1;d1=24728.24728.4	controllerType=0 controllerNumber=1 scan=24728	53.1351
29643:4	1	S.MP[+15.995]LPPHPGHPGYINFS[+79.966]YEVLTPLKWY[+15.995]QS.M		P[+16], S[+80], Y[+16]	845.903	4	3380.59	3380.59	0	0.9	17	Non	123.24	123.24	0	2.22	1509	>sp|P02817|AMELX_BOVIN Amelogenin, X isoform OS=Bos taurus OX=9913 GN=AMELX PE=1 SV=2	1	hf1_10472_ebo_36_1_261219.ScanId;v=1;d1=22403.22403.4	controllerType=0 controllerNumber=1 scan=22403	48.9009
30825:4	1	S.MP[+15.995]LPPHPGHPGYINFS[+79.966]YEVLTPLKW[+15.995]YQS.M		P[+16], S[+80], W[+16]	845.908	4	3380.61	3380.59	0	7.9	17	Non	147	147	0	2.73	1509	>sp|P02817|AMELX_BOVIN Amelogenin, X isoform OS=Bos taurus OX=9913 GN=AMELX PE=1 SV=2	1	hf1_10472_ebo_36_1_261219.ScanId;v=1;d1=23167.23167.4	controllerType=0 controllerNumber=1 scan=23167	50.2772
31410:4	1	S.MP[+15.995]LPPHPGHPGYINFS[+79.966]Y[+15.995]EVLTPLKWYQS.M		P[+16], S[+80], Y[+16]	845.904	4	3380.59	3380.59	0	2.6	17	Non	192.13	192.13	4.51	3.23	1509	>sp|P02817|AMELX_BOVIN Amelogenin, X isoform OS=Bos taurus OX=9913 GN=AMELX PE=1 SV=2	1	hf1_10472_ebo_36_1_261219.ScanId;v=1;d1=23551.23551.4	controllerType=0 controllerNumber=1 scan=23551	50.9675
29172:3	1	S.MP[+15.995]LPPHPGHPGYINFS[+79.966]YEVLTPLKW[+15.995]YQS.M		P[+16], S[+80], W[+16]	1127.54	3	3380.59	3380.59	0	1.7	17	Non	218.03	218.03	0	3.73	1509	>sp|P02817|AMELX_BOVIN Amelogenin, X isoform OS=Bos taurus OX=9913 GN=AMELX PE=1 SV=2	1	hf1_10472_ebo_36_1_261219.ScanId;v=1;d1=22114.22114.3	controllerType=0 controllerNumber=1 scan=22114	48.3809
31987:3	1	S.M[+15.995]PLPPHPGHPGYINFS[+79.966]Y[+15.995]EVLTPLKWYQS.M		M[+16], S[+80], Y[+16]	1127.54	3	3380.59	3380.59	0	2.1	17	Non	219.93	219.93	3.12	3.73	1509	>sp|P02817|AMELX_BOVIN Amelogenin, X isoform OS=Bos taurus OX=9913 GN=AMELX PE=1 SV=2	1	hf1_10472_ebo_36_1_261219.ScanId;v=1;d1=23927.23927.3	controllerType=0 controllerNumber=1 scan=23927	51.6513
32625:4	1	S.M[+15.995]PLPP[+31.990]HPGHPGYINFSY[+31.990]EVLTPLKWYQS.M		M[+16], P[+32], Y[+32]	837.91	4	3348.62	3348.6	0	4.7	17	Non	222.32	222.32	1.52	3.77	1509	>sp|P02817|AMELX_BOVIN Amelogenin, X isoform OS=Bos taurus OX=9913 GN=AMELX PE=1 SV=2	1	hf1_10472_ebo_36_1_261219.ScanId;v=1;d1=24342.24342.4	controllerType=0 controllerNumber=1 scan=24342	52.4164
29010:4	1	S.M[+15.995]PLPPHPGHPGYINFS[+79.966]YEVLTPLKW[+15.995]YQS.M		M[+16], S[+80], W[+16]	845.905	4	3380.6	3380.59	0	3.9	17	Non	233.37	233.37	10.27	3.71	1509	>sp|P02817|AMELX_BOVIN Amelogenin, X isoform OS=Bos taurus OX=9913 GN=AMELX PE=1 SV=2	1	hf1_10472_ebo_36_1_261219.ScanId;v=1;d1=22015.22015.4	controllerType=0 controllerNumber=1 scan=22015	48.2023
30309:3	1	S.MP[+15.995]LPPHPGHPGYINFS[+79.966]YEVLTPLKWY[+31.990]QS.M		P[+16], S[+80], Y[+32]	1132.87	3	3396.6	3396.58	0	5.3	17	Non	245.66	245.66	0	5.79	1509	>sp|P02817|AMELX_BOVIN Amelogenin, X isoform OS=Bos taurus OX=9913 GN=AMELX PE=1 SV=2	1	hf1_10472_ebo_36_1_261219.ScanId;v=1;d1=22832.22832.3	controllerType=0 controllerNumber=1 scan=22832	49.6715
31121:4	1	S.M[+15.995]PLPPHPGHPGYINF[+15.995]S[+79.966]YEVLTPLKWYQS.M		F[+16], M[+16], S[+80]	845.907	4	3380.61	3380.59	0	6.8	17	Non	256.27	256.27	8.43	5.47	1509	>sp|P02817|AMELX_BOVIN Amelogenin, X isoform OS=Bos taurus OX=9913 GN=AMELX PE=1 SV=2	1	hf1_10472_ebo_36_1_261219.ScanId;v=1;d1=23360.23360.4	controllerType=0 controllerNumber=1 scan=23360	50.6233
32373:4	1	S.MP[+15.995]LPPHPGHPGYIN[+0.984]FS[+79.966]YEVLTPLKWYQS.M		N[+1], P[+16], S[+80]	842.154	4	3365.6	3365.57	0	6.4	17	Non	263.24	263.24	4	5.47	1509	>sp|P02817|AMELX_BOVIN Amelogenin, X isoform OS=Bos taurus OX=9913 GN=AMELX PE=1 SV=2	1	hf1_10472_ebo_36_1_261219.ScanId;v=1;d1=24173.24173.4	controllerType=0 controllerNumber=1 scan=24173	52.1037
29960:4	1	S.M[+15.995]PLPPHPGHPGYINFS[+79.966]YEVLTPLKW[+15.995]YQS.M		M[+16], S[+80], W[+16]	845.905	4	3380.6	3380.59	0	4.4	17	Non	272.97	272.97	9.98	5.55	1509	>sp|P02817|AMELX_BOVIN Amelogenin, X isoform OS=Bos taurus OX=9913 GN=AMELX PE=1 SV=2	1	hf1_10472_ebo_36_1_261219.ScanId;v=1;d1=22606.22606.4	controllerType=0 controllerNumber=1 scan=22606	49.2618
32075:4	1	S.MP[+15.995]LPPHPGHPGYINFS[+79.966]YEVLTPLKWYQ[+0.984]S.M		P[+16], Q[+1], S[+80]	842.156	4	3365.6	3365.57	0	7.9	17	Non	305.78	305.78	4	5.64	1509	>sp|P02817|AMELX_BOVIN Amelogenin, X isoform OS=Bos taurus OX=9913 GN=AMELX PE=1 SV=2	1	hf1_10472_ebo_36_1_261219.ScanId;v=1;d1=23982.23982.4	controllerType=0 controllerNumber=1 scan=23982	51.7518
33585:3	1	S.MPLPPHPGHPGYIN[+0.984]FS[+79.966]YEVLTPLKWYQ[+0.984]S.M		N[+1], Q[+1], S[+80]	1117.53	3	3350.59	3350.56	0	7.8	17	Non	310.41	220.96	24.17	5.09	1509	>sp|P02817|AMELX_BOVIN Amelogenin, X isoform OS=Bos taurus OX=9913 GN=AMELX PE=1 SV=2	1	hf1_10472_ebo_36_1_261219.ScanId;v=1;d1=24976.24976.3	controllerType=0 controllerNumber=1 scan=24976	53.5914
28867:3	1	S.MP[+15.995]LPPHPGHPGYINFS[+79.966]YEVLTPLKWY[+15.995]QS.M		P[+16], S[+80], Y[+16]	1127.54	3	3380.6	3380.59	0	5.1	17	Non	344.15	344.15	0	6.34	1509	>sp|P02817|AMELX_BOVIN Amelogenin, X isoform OS=Bos taurus OX=9913 GN=AMELX PE=1 SV=2	1	hf1_10472_ebo_36_1_261219.ScanId;v=1;d1=21925.21925.3	controllerType=0 controllerNumber=1 scan=21925	48.0375
31056:3	1	S.M[+15.995]PLPPHPGHPGYINF[+15.995]S[+79.966]YEVLTPLKWYQS.M		F[+16], M[+16], S[+80]	1127.54	3	3380.6	3380.59	0	4.4	17	Non	437.26	437.26	1.8	7.32	1509	>sp|P02817|AMELX_BOVIN Amelogenin, X isoform OS=Bos taurus OX=9913 GN=AMELX PE=1 SV=2	1	hf1_10472_ebo_36_1_261219.ScanId;v=1;d1=23318.23318.3	controllerType=0 controllerNumber=1 scan=23318	50.5485
29801:3	1	S.M[+15.995]PLPPHPGHPGYINFS[+79.966]YEVLTPLK[+15.995]WYQS.M		K[+16], M[+16], S[+80]	1127.54	3	3380.59	3380.59	0	2	17	Non	446.08	446.08	4.55	6.69	1509	>sp|P02817|AMELX_BOVIN Amelogenin, X isoform OS=Bos taurus OX=9913 GN=AMELX PE=1 SV=2	1	hf1_10472_ebo_36_1_261219.ScanId;v=1;d1=22502.22502.3	controllerType=0 controllerNumber=1 scan=22502	49.0764
30103:3	1	S.MP[+15.995]LPPHPGHPGYINFS[+79.966]YEVLTPLKW[+15.995]YQS.M		P[+16], S[+80], W[+16]	1127.54	3	3380.61	3380.59	0	7.9	17	Non	452.87	452.87	4	7.27	1509	>sp|P02817|AMELX_BOVIN Amelogenin, X isoform OS=Bos taurus OX=9913 GN=AMELX PE=1 SV=2	1	hf1_10472_ebo_36_1_261219.ScanId;v=1;d1=22700.22700.3	controllerType=0 controllerNumber=1 scan=22700	49.4325
31357:3	1	S.MP[+15.995]LPPHPGHPGYINF[+15.995]S[+79.966]YEVLTPLKWYQS.M		F[+16], P[+16], S[+80]	1127.54	3	3380.6	3380.59	0	5.1	17	Non	567.2	567.2	5.8	8.4	1509	>sp|P02817|AMELX_BOVIN Amelogenin, X isoform OS=Bos taurus OX=9913 GN=AMELX PE=1 SV=2	1	hf1_10472_ebo_36_1_261219.ScanId;v=1;d1=23516.23516.3	controllerType=0 controllerNumber=1 scan=23516	50.9007
32375:3	1	S.M[+15.995]PLPPHPGHPGYIN[+0.984]FS[+79.966]YEVLTPLKWYQS.M		M[+16], N[+1], S[+80]	1122.54	3	3365.6	3365.57	0	7.5	17	Non	866.17	785.12	11.06	14.82	1509	>sp|P02817|AMELX_BOVIN Amelogenin, X isoform OS=Bos taurus OX=9913 GN=AMELX PE=1 SV=2	1	hf1_10472_ebo_36_1_261219.ScanId;v=1;d1=24175.24175.3	controllerType=0 controllerNumber=1 scan=24175	52.1067
32078:3	1	S.M[+15.995]PLPPHPGHPGYINFS[+79.966]YEVLTPLKWYQ[+0.984]S.M		M[+16], Q[+1], S[+80]	1122.54	3	3365.6	3365.57	0	8.3	17	Non	986.18	912.79	24.42	16.82	1509	>sp|P02817|AMELX_BOVIN Amelogenin, X isoform OS=Bos taurus OX=9913 GN=AMELX PE=1 SV=2	1	hf1_10472_ebo_36_1_261219.ScanId;v=1;d1=23984.23984.3	controllerType=0 controllerNumber=1 scan=23984	51.7548
29949:4	1	S.MP[+15.995]LPPHPGHPGYINFSY[+31.990]EVLTPLKWY[+31.990]Q[+0.984]S.M		P[+16], Q[+1], Y[+32]*2	838.159	4	3349.61	3349.59	0	7.3	17	Non	85.59	85.59	0	1.27	1509	>sp|P02817|AMELX_BOVIN Amelogenin, X isoform OS=Bos taurus OX=9913 GN=AMELX PE=1 SV=2	1	hf1_10472_ebo_36_1_261219.ScanId;v=1;d1=22598.22598.4	controllerType=0 controllerNumber=1 scan=22598	49.2469
32929:3	1	S.MPLPPHPGHP[+31.990]GY[+15.995]IN[+0.984]FSY[+31.990]EVLTPLKWYQS.M		N[+1], P[+32], Y[+16][+32]	1117.21	3	3349.62	3349.59	0	8.6	17	Non	218.29	218.29	3.81	3.74	1509	>sp|P02817|AMELX_BOVIN Amelogenin, X isoform OS=Bos taurus OX=9913 GN=AMELX PE=1 SV=2	1	hf1_10472_ebo_36_1_261219.ScanId;v=1;d1=24545.24545.3	controllerType=0 controllerNumber=1 scan=24545	52.7949
31977:3	1	S.M[+15.995]PLPPHPGHPGYINFSYEVLTPLKWYQSM.I		M[+16]	1139.22	3	3415.65	3415.66	0	-4.9	17	Non	203.1	203.1	7.19	2.73	1509	>sp|P02817|AMELX_BOVIN Amelogenin, X isoform OS=Bos taurus OX=9913 GN=AMELX PE=1 SV=2	1	hf1_10472_ebo_36_1_261219.ScanId;v=1;d1=23920.23920.3	controllerType=0 controllerNumber=1 scan=23920	51.6378
32349:3	1	S.MP[+15.995]LPPHPGHPGYINFS[+79.966]YEVLTPLKWYQSM.I		P[+16], S[+80]	1165.88	3	3495.62	3495.63	0	-2.8	17	Non	149.36	149.36	4	2.32	1509	>sp|P02817|AMELX_BOVIN Amelogenin, X isoform OS=Bos taurus OX=9913 GN=AMELX PE=1 SV=2	1	hf1_10472_ebo_36_1_261219.ScanId;v=1;d1=24157.24157.3	controllerType=0 controllerNumber=1 scan=24157	52.0738
35011:4	1	S.MP[+15.995]LPPHPGHPGYINFS[+79.966]YEVLTPLKWYQSM.I		P[+16], S[+80]	874.668	4	3495.65	3495.63	0	6.2	17	Non	318.51	318.51	2.4	5.72	1509	>sp|P02817|AMELX_BOVIN Amelogenin, X isoform OS=Bos taurus OX=9913 GN=AMELX PE=1 SV=2	1	hf1_10472_ebo_36_1_261219.ScanId;v=1;d1=25886.25886.4	controllerType=0 controllerNumber=1 scan=25886	55.2668
32919:4	1	S.MPLPPHPGHPGYINFS[+79.966]YEVLTPLKWYQSM[+15.995].I		M[+16], S[+80]	874.668	4	3495.65	3495.63	0	6.2	17	Non	377.21	377.21	33.33	7.01	1509	>sp|P02817|AMELX_BOVIN Amelogenin, X isoform OS=Bos taurus OX=9913 GN=AMELX PE=1 SV=2	1	hf1_10472_ebo_36_1_261219.ScanId;v=1;d1=24540.24540.4	controllerType=0 controllerNumber=1 scan=24540	52.7873
32639:3	1	S.MPLPPHPGHPGYINFS[+79.966]YEVLTPLKWYQSM[+15.995].I		M[+16], S[+80]	1165.89	3	3495.64	3495.63	0	3.9	17	Non	458.23	458.23	39.97	6.91	1509	>sp|P02817|AMELX_BOVIN Amelogenin, X isoform OS=Bos taurus OX=9913 GN=AMELX PE=1 SV=2	1	hf1_10472_ebo_36_1_261219.ScanId;v=1;d1=24350.24350.3	controllerType=0 controllerNumber=1 scan=24350	52.4314
32656:3	1	S.MPLPPHPGHPGYINFS[+79.966]YEVLTPLKWYQSM[+15.995].I		M[+16], S[+80]	1165.89	3	3495.64	3495.63	0	4.1	17	Non	535.41	535.41	53.93	7.08	1509	>sp|P02817|AMELX_BOVIN Amelogenin, X isoform OS=Bos taurus OX=9913 GN=AMELX PE=1 SV=2	1	hf1_10472_ebo_36_1_261219.ScanId;v=1;d1=24361.24361.3	controllerType=0 controllerNumber=1 scan=24361	52.4509
33230:3	1	S.MPLPPHPGHPGYINFS[+79.966]YEVLTPLKWYQSM[+15.995].I		M[+16], S[+80]	1165.88	3	3495.63	3495.63	0	1.1	17	Non	537.1	537.1	42.79	6.87	1509	>sp|P02817|AMELX_BOVIN Amelogenin, X isoform OS=Bos taurus OX=9913 GN=AMELX PE=1 SV=2	1	hf1_10472_ebo_36_1_261219.ScanId;v=1;d1=24746.24746.3	controllerType=0 controllerNumber=1 scan=24746	53.1653
34974:3	1	S.M[+15.995]PLPPHPGHPGYINFS[+79.966]YEVLTPLKWYQSM.I		M[+16], S[+80]	1165.89	3	3495.66	3495.63	0	7.2	17	Non	691.61	691.61	9.82	10.82	1509	>sp|P02817|AMELX_BOVIN Amelogenin, X isoform OS=Bos taurus OX=9913 GN=AMELX PE=1 SV=2	1	hf1_10472_ebo_36_1_261219.ScanId;v=1;d1=25862.25862.3	controllerType=0 controllerNumber=1 scan=25862	55.2218
33592:3	1	S.MPLPPHPGHPGYINFS[+79.966]YEVLTPLKWYQSM[+15.995].I		M[+16], S[+80]	1165.88	3	3495.64	3495.63	0	1.4	17	Non	708.1	708.1	55.57	11.16	1509	>sp|P02817|AMELX_BOVIN Amelogenin, X isoform OS=Bos taurus OX=9913 GN=AMELX PE=1 SV=2	1	hf1_10472_ebo_36_1_261219.ScanId;v=1;d1=24981.24981.3	controllerType=0 controllerNumber=1 scan=24981	53.599
32939:3	1	S.MPLPPHPGHPGYINFS[+79.966]YEVLTPLKWYQSM[+15.995].I		M[+16], S[+80]	1165.89	3	3495.66	3495.63	0	8.6	17	Non	795.99	795.99	70.49	12.17	1509	>sp|P02817|AMELX_BOVIN Amelogenin, X isoform OS=Bos taurus OX=9913 GN=AMELX PE=1 SV=2	1	hf1_10472_ebo_36_1_261219.ScanId;v=1;d1=24551.24551.3	controllerType=0 controllerNumber=1 scan=24551	52.8067
36458:4	1	S.MP[+15.995]LPPHPGHPGYINFS[+79.966]YEVLTPLKWYQ[+0.984]SM.I		P[+16], Q[+1], S[+80]	874.917	4	3496.64	3496.61	0	8.4	17	Non	103.04	103.04	5.8	2.21	1509	>sp|P02817|AMELX_BOVIN Amelogenin, X isoform OS=Bos taurus OX=9913 GN=AMELX PE=1 SV=2	1	hf1_10472_ebo_36_1_261219.ScanId;v=1;d1=26808.26808.4	controllerType=0 controllerNumber=1 scan=26808	56.9299
34673:4	1	S.M[+15.995]PLPPHPGHPGYINFS[+79.966]YEVLTPLKWYQSM[+15.995].I		M[+16]*2, S[+80]	878.666	4	3511.64	3511.63	0	4.5	17	Non	107.96	107.96	0	2.25	1509	>sp|P02817|AMELX_BOVIN Amelogenin, X isoform OS=Bos taurus OX=9913 GN=AMELX PE=1 SV=2	1	hf1_10472_ebo_36_1_261219.ScanId;v=1;d1=25670.25670.4	controllerType=0 controllerNumber=1 scan=25670	54.8672
31846:4	1	S.M[+31.990]PLPPHPGHPGYINFS[+79.966]YEVLTPLKWYQSM[+15.995].I		M[+16][+32], S[+80]	882.663	4	3527.63	3527.62	0	2.7	17	Non	117.28	117.28	5.35	2.21	1509	>sp|P02817|AMELX_BOVIN Amelogenin, X isoform OS=Bos taurus OX=9913 GN=AMELX PE=1 SV=2	1	hf1_10472_ebo_36_1_261219.ScanId;v=1;d1=23842.23842.4	controllerType=0 controllerNumber=1 scan=23842	51.4971
31313:5	1	S.M[+15.995]PLPPHPGHPGYINFS[+79.966]YEVLTPLKWYQSM[+15.995].I		M[+16]*2, S[+80]	703.134	5	3511.64	3511.63	0	4.1	17	Non	136.09	136.09	5.56	2.22	1509	>sp|P02817|AMELX_BOVIN Amelogenin, X isoform OS=Bos taurus OX=9913 GN=AMELX PE=1 SV=2	1	hf1_10472_ebo_36_1_261219.ScanId;v=1;d1=23488.23488.5	controllerType=0 controllerNumber=1 scan=23488	50.8499
32554:5	1	S.M[+15.995]PLPPHPGHPGYINFS[+79.966]YEVLTPLKWYQSM[+15.995].I		M[+16]*2, S[+80]	703.131	5	3511.63	3511.63	0	0.1	17	Non	145.39	145.39	0	2.23	1509	>sp|P02817|AMELX_BOVIN Amelogenin, X isoform OS=Bos taurus OX=9913 GN=AMELX PE=1 SV=2	1	hf1_10472_ebo_36_1_261219.ScanId;v=1;d1=24294.24294.5	controllerType=0 controllerNumber=1 scan=24294	52.3265
29143:4	1	S.MP[+15.995]LPPHPGHPGYINFS[+79.966]YEVLTPLKWYQSM[+31.990].I		M[+32], P[+16], S[+80]	882.666	4	3527.64	3527.62	0	6.3	17	Non	150.73	150.73	0	2.73	1509	>sp|P02817|AMELX_BOVIN Amelogenin, X isoform OS=Bos taurus OX=9913 GN=AMELX PE=1 SV=2	1	hf1_10472_ebo_36_1_261219.ScanId;v=1;d1=22097.22097.6	controllerType=0 controllerNumber=1 scan=22097	48.3494
34371:3	1	S.MPLPPHPGHPGYINFS[+79.966]YEVLTPLKWYQ[+0.984]SM[+15.995].I		M[+16], Q[+1], S[+80]	1166.22	3	3496.63	3496.61	0	5.3	17	Non	172.6	172.6	49.78	3.96	1509	>sp|P02817|AMELX_BOVIN Amelogenin, X isoform OS=Bos taurus OX=9913 GN=AMELX PE=1 SV=2	1	hf1_10472_ebo_36_1_261219.ScanId;v=1;d1=25482.25482.3	controllerType=0 controllerNumber=1 scan=25482	54.5244
34062:4	1	S.MPLPPHPGHPGYINFS[+79.966]YEVLTPLKWYQ[+0.984]SM[+15.995].I		M[+16], Q[+1], S[+80]	874.913	4	3496.63	3496.61	0	4.5	17	Non	172.72	153.09	31.28	2.79	1509	>sp|P02817|AMELX_BOVIN Amelogenin, X isoform OS=Bos taurus OX=9913 GN=AMELX PE=1 SV=2	1	hf1_10472_ebo_36_1_261219.ScanId;v=1;d1=25285.25285.4	controllerType=0 controllerNumber=1 scan=25285	54.1655
29401:4	1	S.MP[+15.995]LPPHPGHPGYINFS[+79.966]YEVLTPLKWYQSM[+31.990].I		M[+32], P[+16], S[+80]	882.664	4	3527.63	3527.62	0	3.5	17	Non	173.09	173.09	0	3.23	1509	>sp|P02817|AMELX_BOVIN Amelogenin, X isoform OS=Bos taurus OX=9913 GN=AMELX PE=1 SV=2	1	hf1_10472_ebo_36_1_261219.ScanId;v=1;d1=22255.22255.4	controllerType=0 controllerNumber=1 scan=22255	48.6372
37310:3	1	S.M[+15.995]PLPPHPGHPGYINFS[+79.966]YEVLTPLKWYQ[+0.984]SM.I		M[+16], Q[+1], S[+80]	1166.21	3	3496.62	3496.61	0	3	17	Non	176.12	176.12	2.01	3.89	1509	>sp|P02817|AMELX_BOVIN Amelogenin, X isoform OS=Bos taurus OX=9913 GN=AMELX PE=1 SV=2	1	hf1_10472_ebo_36_1_261219.ScanId;v=1;d1=27321.27321.3	controllerType=0 controllerNumber=1 scan=27321	57.8466
31760:3	1	S.MP[+15.995]LPPHPGHPGYINFS[+79.966]Y[+31.990]EVLTPLKWYQSM.I		P[+16], S[+80], Y[+32]	1176.55	3	3527.62	3527.62	0	1	17	Non	177.49	177.49	2.22	3.26	1509	>sp|P02817|AMELX_BOVIN Amelogenin, X isoform OS=Bos taurus OX=9913 GN=AMELX PE=1 SV=2	1	hf1_10472_ebo_36_1_261219.ScanId;v=1;d1=23784.23784.3	controllerType=0 controllerNumber=1 scan=23784	51.3901
31572:4	1	S.MP[+15.995]LPPHPGHPGYINFS[+79.966]YEVLTP[+31.990]LKWYQSM.I		P[+16][+32], S[+80]	882.663	4	3527.63	3527.62	0	2.8	17	Non	202.8	202.8	4	3.27	1509	>sp|P02817|AMELX_BOVIN Amelogenin, X isoform OS=Bos taurus OX=9913 GN=AMELX PE=1 SV=2	1	hf1_10472_ebo_36_1_261219.ScanId;v=1;d1=23655.23655.4	controllerType=0 controllerNumber=1 scan=23655	51.1521
31156:4	1	S.M[+31.990]PLPPHPGHPGYINFS[+79.966]YEVLTPLKWYQSM[+15.995].I		M[+16][+32], S[+80]	882.665	4	3527.64	3527.62	0	4.7	17	Non	207.65	207.65	0	4.22	1509	>sp|P02817|AMELX_BOVIN Amelogenin, X isoform OS=Bos taurus OX=9913 GN=AMELX PE=1 SV=2	1	hf1_10472_ebo_36_1_261219.ScanId;v=1;d1=23383.23383.4	controllerType=0 controllerNumber=1 scan=23383	50.6631
34545:3	1	S.M[+15.995]PLPPHPGHPGYINFS[+79.966]YEVLTPLKWYQSM[+15.995].I		M[+16]*2, S[+80]	1171.21	3	3511.62	3511.63	0	-0.3	17	Non	222.98	222.98	0	3.67	1509	>sp|P02817|AMELX_BOVIN Amelogenin, X isoform OS=Bos taurus OX=9913 GN=AMELX PE=1 SV=2	1	hf1_10472_ebo_36_1_261219.ScanId;v=1;d1=25591.25591.3	controllerType=0 controllerNumber=1 scan=25591	54.7214
31158:4	1	S.MP[+15.995]LPPHPGHPGYINFS[+79.966]YEVLTPLKWYQSM[+15.995].I		M[+16], P[+16], S[+80]	878.664	4	3511.64	3511.63	0	3.1	17	Non	241.15	241.15	1.8	4.57	1509	>sp|P02817|AMELX_BOVIN Amelogenin, X isoform OS=Bos taurus OX=9913 GN=AMELX PE=1 SV=2	1	hf1_10472_ebo_36_1_261219.ScanId;v=1;d1=23385.23385.4	controllerType=0 controllerNumber=1 scan=23385	50.6661
33786:4	1	S.MPLPPHPGHPGYINFS[+79.966]YEVLTPLKWYQ[+0.984]SM[+15.995].I		M[+16], Q[+1], S[+80]	874.914	4	3496.64	3496.61	0	5.9	17	Non	290.53	252.61	50.11	5.65	1509	>sp|P02817|AMELX_BOVIN Amelogenin, X isoform OS=Bos taurus OX=9913 GN=AMELX PE=1 SV=2	1	hf1_10472_ebo_36_1_261219.ScanId;v=1;d1=25102.25102.4	controllerType=0 controllerNumber=1 scan=25102	53.8248
34709:4	1	S.MPLPPHPGHPGYINFS[+79.966]YEVLTPLKWYQ[+0.984]SM[+15.995].I		M[+16], Q[+1], S[+80]	874.911	4	3496.62	3496.61	0	2	17	Non	298.34	297.61	56.05	4.98	1509	>sp|P02817|AMELX_BOVIN Amelogenin, X isoform OS=Bos taurus OX=9913 GN=AMELX PE=1 SV=2	1	hf1_10472_ebo_36_1_261219.ScanId;v=1;d1=25694.25694.4	controllerType=0 controllerNumber=1 scan=25694	54.9123
45282:4	1	S.M[+15.995]PLPPHPGHPGYINFS[+79.966]YEVLTPLKWYQSM[+15.995].I		M[+16]*2, S[+80]	878.666	4	3511.64	3511.63	0	4.9	17	Non	302.8	302.8	0	5.72	1509	>sp|P02817|AMELX_BOVIN Amelogenin, X isoform OS=Bos taurus OX=9913 GN=AMELX PE=1 SV=2	1	hf1_10472_ebo_36_1_261219.ScanId;v=1;d1=33686.33686.4	controllerType=0 controllerNumber=1 scan=33686	73.5533
36362:3	1	S.M[+15.995]PLPPHPGHPGYINFS[+79.966]YEVLTPLKWYQ[+0.984]SM.I		M[+16], Q[+1], S[+80]	1166.22	3	3496.64	3496.61	0	6.1	17	Non	305.56	305.56	1.97	6.19	1509	>sp|P02817|AMELX_BOVIN Amelogenin, X isoform OS=Bos taurus OX=9913 GN=AMELX PE=1 SV=2	1	hf1_10472_ebo_36_1_261219.ScanId;v=1;d1=26746.26746.3	controllerType=0 controllerNumber=1 scan=26746	56.8186
36057:3	1	S.MP[+15.995]LPPHPGHPGYIN[+0.984]FS[+79.966]YEVLTPLKWYQSM.I		N[+1], P[+16], S[+80]	1166.22	3	3496.63	3496.61	0	4.9	17	Non	312.07	312.07	4	5.96	1509	>sp|P02817|AMELX_BOVIN Amelogenin, X isoform OS=Bos taurus OX=9913 GN=AMELX PE=1 SV=2	1	hf1_10472_ebo_36_1_261219.ScanId;v=1;d1=26552.26552.3	controllerType=0 controllerNumber=1 scan=26552	56.4673
30010:4	1	S.MP[+15.995]LPPHPGHPGYINFS[+79.966]YEVLTPLKWYQSM[+31.990].I		M[+32], P[+16], S[+80]	882.664	4	3527.64	3527.62	0	4.4	17	Non	340.12	340.12	0	5.88	1509	>sp|P02817|AMELX_BOVIN Amelogenin, X isoform OS=Bos taurus OX=9913 GN=AMELX PE=1 SV=2	1	hf1_10472_ebo_36_1_261219.ScanId;v=1;d1=22638.22638.4	controllerType=0 controllerNumber=1 scan=22638	49.3187
36151:4	1	S.MP[+15.995]LPPHPGHPGYINFS[+79.966]YEVLTPLKWYQ[+0.984]SM.I		P[+16], Q[+1], S[+80]	874.916	4	3496.64	3496.61	0	7.6	17	Non	346.27	333.49	5.8	5.8	1509	>sp|P02817|AMELX_BOVIN Amelogenin, X isoform OS=Bos taurus OX=9913 GN=AMELX PE=1 SV=2	1	hf1_10472_ebo_36_1_261219.ScanId;v=1;d1=26613.26613.4	controllerType=0 controllerNumber=1 scan=26613	56.5766
32356:3	1	S.MP[+15.995]LPPHPGHPGYINFS[+79.966]YEVLTPLKWYQSM[+31.990].I		M[+32], P[+16], S[+80]	1176.55	3	3527.63	3527.62	0	2	17	Non	375.88	375.88	4	6.52	1509	>sp|P02817|AMELX_BOVIN Amelogenin, X isoform OS=Bos taurus OX=9913 GN=AMELX PE=1 SV=2	1	hf1_10472_ebo_36_1_261219.ScanId;v=1;d1=24162.24162.3	controllerType=0 controllerNumber=1 scan=24162	52.0842
31744:4	1	S.M[+15.995]PLPPHPGHPGYINFS[+79.966]YEVLTPLKWYQSM[+15.995].I		M[+16]*2, S[+80]	878.666	4	3511.64	3511.63	0	4.3	17	Non	378.9	378.9	0	7.01	1509	>sp|P02817|AMELX_BOVIN Amelogenin, X isoform OS=Bos taurus OX=9913 GN=AMELX PE=1 SV=2	1	hf1_10472_ebo_36_1_261219.ScanId;v=1;d1=23773.23773.4	controllerType=0 controllerNumber=1 scan=23773	51.3716
31459:4	1	S.M[+15.995]PLPPHPGHPGYINFS[+79.966]YEVLTPLKWYQSM[+15.995].I		M[+16]*2, S[+80]	878.666	4	3511.64	3511.63	0	4.9	17	Non	385.21	385.21	0	7.07	1509	>sp|P02817|AMELX_BOVIN Amelogenin, X isoform OS=Bos taurus OX=9913 GN=AMELX PE=1 SV=2	1	hf1_10472_ebo_36_1_261219.ScanId;v=1;d1=23583.23583.4	controllerType=0 controllerNumber=1 scan=23583	51.0243
28789:3	1	S.M[+15.995]PLPPHPGHPGYINFS[+79.966]YEVLTPLKWYQSM[+31.990].I		M[+16][+32], S[+80]	1176.55	3	3527.63	3527.62	0	1.3	17	Non	395.92	395.92	0	6.58	1509	>sp|P02817|AMELX_BOVIN Amelogenin, X isoform OS=Bos taurus OX=9913 GN=AMELX PE=1 SV=2	1	hf1_10472_ebo_36_1_261219.ScanId;v=1;d1=21876.21876.3	controllerType=0 controllerNumber=1 scan=21876	47.9459
32039:4	1	S.MP[+15.995]LPPHPGHPGYINFS[+79.966]YEVLTPLKWYQSM[+15.995].I		M[+16], P[+16], S[+80]	878.666	4	3511.64	3511.63	0	5.2	17	Non	399.93	399.93	1.8	7.01	1509	>sp|P02817|AMELX_BOVIN Amelogenin, X isoform OS=Bos taurus OX=9913 GN=AMELX PE=1 SV=2	1	hf1_10472_ebo_36_1_261219.ScanId;v=1;d1=23960.23960.4	controllerType=0 controllerNumber=1 scan=23960	51.7128
31416:3	1	S.M[+15.995]PLPPHPGHPGYINFS[+79.966]YEVLTPLKWYQSM[+31.990].I		M[+16][+32], S[+80]	1176.55	3	3527.64	3527.62	0	5.8	17	Non	432.36	432.36	0	7.27	1509	>sp|P02817|AMELX_BOVIN Amelogenin, X isoform OS=Bos taurus OX=9913 GN=AMELX PE=1 SV=2	1	hf1_10472_ebo_36_1_261219.ScanId;v=1;d1=23554.23554.3	controllerType=0 controllerNumber=1 scan=23554	50.9721
34052:3	1	S.MPLPPHPGHPGYIN[+0.984]FS[+79.966]YEVLTPLKWYQSM[+15.995].I		M[+16], N[+1], S[+80]	1166.22	3	3496.64	3496.61	0	7.1	17	Non	467.91	467.91	14.51	7.21	1509	>sp|P02817|AMELX_BOVIN Amelogenin, X isoform OS=Bos taurus OX=9913 GN=AMELX PE=1 SV=2	1	hf1_10472_ebo_36_1_261219.ScanId;v=1;d1=25279.25279.4	controllerType=0 controllerNumber=1 scan=25279	54.1535
31123:3	1	S.M[+31.990]PLPPHPGHPGYINFS[+79.966]YEVLTPLKWYQSM[+15.995].I		M[+16][+32], S[+80]	1176.55	3	3527.64	3527.62	0	6.8	17	Non	540.16	540.16	0	7.38	1509	>sp|P02817|AMELX_BOVIN Amelogenin, X isoform OS=Bos taurus OX=9913 GN=AMELX PE=1 SV=2	1	hf1_10472_ebo_36_1_261219.ScanId;v=1;d1=23361.23361.3	controllerType=0 controllerNumber=1 scan=23361	50.6249
31247:3	1	S.MP[+15.995]LPPHPGHPGYINFS[+79.966]YEVLTPLKWYQSM[+15.995].I		M[+16], P[+16], S[+80]	1171.22	3	3511.66	3511.63	0	9	17	Non	569.34	569.34	1.8	8.17	1509	>sp|P02817|AMELX_BOVIN Amelogenin, X isoform OS=Bos taurus OX=9913 GN=AMELX PE=1 SV=2	1	hf1_10472_ebo_36_1_261219.ScanId;v=1;d1=23445.23445.3	controllerType=0 controllerNumber=1 scan=23445	50.7738
34671:3	1	S.MPLPPHPGHPGYINFS[+79.966]YEVLTPLKWYQ[+0.984]SM[+15.995].I		M[+16], Q[+1], S[+80]	1166.21	3	3496.63	3496.61	0	3.3	17	Non	633.97	633.97	64.03	9.37	1509	>sp|P02817|AMELX_BOVIN Amelogenin, X isoform OS=Bos taurus OX=9913 GN=AMELX PE=1 SV=2	1	hf1_10472_ebo_36_1_261219.ScanId;v=1;d1=25669.25669.3	controllerType=0 controllerNumber=1 scan=25669	54.8657
30041:3	1	S.M[+15.995]PLPPHPGHPGYINFS[+79.966]YEVLTPLKWYQSM[+31.990].I		M[+16][+32], S[+80]	1176.55	3	3527.64	3527.62	0	5.4	17	Non	667.33	667.33	0	10.89	1509	>sp|P02817|AMELX_BOVIN Amelogenin, X isoform OS=Bos taurus OX=9913 GN=AMELX PE=1 SV=2	1	hf1_10472_ebo_36_1_261219.ScanId;v=1;d1=22659.22659.3	controllerType=0 controllerNumber=1 scan=22659	49.3563
33869:3	1	S.MPLPPHPGHPGYIN[+0.984]FS[+79.966]YEVLTPLKWYQSM[+15.995].I		M[+16], N[+1], S[+80]	1166.22	3	3496.64	3496.61	0	8.1	17	Non	755.84	755.84	11.17	12.82	1509	>sp|P02817|AMELX_BOVIN Amelogenin, X isoform OS=Bos taurus OX=9913 GN=AMELX PE=1 SV=2	1	hf1_10472_ebo_36_1_261219.ScanId;v=1;d1=25163.25163.3	controllerType=0 controllerNumber=1 scan=25163	53.943
32126:3	1	S.M[+15.995]PLPPHPGHPGYINFS[+79.966]YEVLTPLKWYQSM[+15.995].I		M[+16]*2, S[+80]	1171.22	3	3511.64	3511.63	0	3.8	17	Non	761.31	761.31	0	12.37	1509	>sp|P02817|AMELX_BOVIN Amelogenin, X isoform OS=Bos taurus OX=9913 GN=AMELX PE=1 SV=2	1	hf1_10472_ebo_36_1_261219.ScanId;v=1;d1=24017.24017.3	controllerType=0 controllerNumber=1 scan=24017	51.8193
31831:3	1	S.M[+15.995]PLPPHPGHPGYINFS[+79.966]YEVLTPLKWYQSM[+15.995].I		M[+16]*2, S[+80]	1171.22	3	3511.65	3511.63	0	7.2	17	Non	992	992	0	16.82	1509	>sp|P02817|AMELX_BOVIN Amelogenin, X isoform OS=Bos taurus OX=9913 GN=AMELX PE=1 SV=2	1	hf1_10472_ebo_36_1_261219.ScanId;v=1;d1=23832.23832.3	controllerType=0 controllerNumber=1 scan=23832	51.4793
31548:3	1	S.M[+15.995]PLPPHPGHPGYINFS[+79.966]YEVLTPLKWYQSM[+15.995].I		M[+16]*2, S[+80]	1171.22	3	3511.64	3511.63	0	5	17	Non	1047.9	1047.9	4.64	17.89	1509	>sp|P02817|AMELX_BOVIN Amelogenin, X isoform OS=Bos taurus OX=9913 GN=AMELX PE=1 SV=2	1	hf1_10472_ebo_36_1_261219.ScanId;v=1;d1=23640.23640.3	controllerType=0 controllerNumber=1 scan=23640	51.127
33319:4	1	S.MP[+15.995]LPPHPGHPGYIN[+0.984]FS[+79.966]YEVLTPLKWYQSM[+31.990].I		M[+32], N[+1], P[+16], S[+80]	882.912	4	3528.63	3528.6	0	5.9	17	Non	44.38	44.38	4	1.08	1509	>sp|P02817|AMELX_BOVIN Amelogenin, X isoform OS=Bos taurus OX=9913 GN=AMELX PE=1 SV=2	1	hf1_10472_ebo_36_1_261219.ScanId;v=1;d1=24807.24807.4	controllerType=0 controllerNumber=1 scan=24807	53.2809
33034:4	1	S.MP[+15.995]LPPHPGHPGYINFS[+79.966]YEVLTPLKWYQ[+0.984]SM[+31.990].I		M[+32], P[+16], Q[+1], S[+80]	882.911	4	3528.62	3528.6	0	5.3	17	Non	46.45	46.45	4	1.08	1509	>sp|P02817|AMELX_BOVIN Amelogenin, X isoform OS=Bos taurus OX=9913 GN=AMELX PE=1 SV=2	1	hf1_10472_ebo_36_1_261219.ScanId;v=1;d1=24614.24614.4	controllerType=0 controllerNumber=1 scan=24614	52.9221
33617:4	1	S.MP[+15.995]LPPHPGHPGYIN[+0.984]FS[+79.966]YEVLTPLKWYQSM[+31.990].I		M[+32], N[+1], P[+16], S[+80]	882.907	4	3528.61	3528.6	0	0.9	17	Non	98.46	98.46	1.07	2.21	1509	>sp|P02817|AMELX_BOVIN Amelogenin, X isoform OS=Bos taurus OX=9913 GN=AMELX PE=1 SV=2	1	hf1_10472_ebo_36_1_261219.ScanId;v=1;d1=24997.24997.4	controllerType=0 controllerNumber=1 scan=24997	53.6289
32146:4	1	S.M[+31.990]PLPPHPGHPGYINFS[+79.966]YEVLTPLKWYQ[+0.984]SM[+15.995].I		M[+16][+32], Q[+1], S[+80]	882.913	4	3528.63	3528.6	0	6.8	17	Non	128.71	128.71	0	2.29	1509	>sp|P02817|AMELX_BOVIN Amelogenin, X isoform OS=Bos taurus OX=9913 GN=AMELX PE=1 SV=2	1	hf1_10472_ebo_36_1_261219.ScanId;v=1;d1=24028.24028.4	controllerType=0 controllerNumber=1 scan=24028	51.8388
35847:4	1	S.MP[+15.995]LPPHPGHP[+15.995]GYINF[+31.990]SY[+31.990]EVLTPLKWYQSM.I		F[+32], P[+16]*2, Y[+32]	874.664	4	3495.63	3495.64	0	-1.3	17	Non	150.79	150.79	0	2.36	1509	>sp|P02817|AMELX_BOVIN Amelogenin, X isoform OS=Bos taurus OX=9913 GN=AMELX PE=1 SV=2	1	hf1_10472_ebo_36_1_261219.ScanId;v=1;d1=26422.26422.4	controllerType=0 controllerNumber=1 scan=26422	56.2356
29706:4	1	S.MP[+15.995]LPPHPGHPGYINFS[+79.966]YEVLTP[+31.990]LKWYQ[+0.984]SM.I		P[+16][+32], Q[+1], S[+80]	882.913	4	3528.63	3528.6	0	7.2	17	Non	188.45	188.45	1.72	3.65	1509	>sp|P02817|AMELX_BOVIN Amelogenin, X isoform OS=Bos taurus OX=9913 GN=AMELX PE=1 SV=2	1	hf1_10472_ebo_36_1_261219.ScanId;v=1;d1=22446.22446.4	controllerType=0 controllerNumber=1 scan=22446	48.9774
32425:4	1	S.MP[+15.995]LPPHPGHPGYIN[+0.984]FS[+79.966]YEVLTPLKWYQSM[+31.990].I		M[+32], N[+1], P[+16], S[+80]	882.914	4	3528.63	3528.6	0	8	17	Non	194.15	194.15	11.1	3.65	1509	>sp|P02817|AMELX_BOVIN Amelogenin, X isoform OS=Bos taurus OX=9913 GN=AMELX PE=1 SV=2	1	hf1_10472_ebo_36_1_261219.ScanId;v=1;d1=24212.24212.4	controllerType=0 controllerNumber=1 scan=24212	52.177
32641:3	1	S.MP[+15.995]LPPHPGHPGYINFS[+79.966]YEVLTPLKWYQ[+0.984]SM[+31.990].I		M[+32], P[+16], Q[+1], S[+80]	1176.88	3	3528.63	3528.6	0	7.9	17	Non	206.02	206.02	4	4.38	1509	>sp|P02817|AMELX_BOVIN Amelogenin, X isoform OS=Bos taurus OX=9913 GN=AMELX PE=1 SV=2	1	hf1_10472_ebo_36_1_261219.ScanId;v=1;d1=24351.24351.3	controllerType=0 controllerNumber=1 scan=24351	52.4329
30611:4	1	S.MP[+15.995]LPPHPGHPGYINFS[+79.966]YEVLTPLKWY[+31.990]Q[+0.984]SM.I		P[+16], Q[+1], S[+80], Y[+32]	882.91	4	3528.62	3528.6	0	4.2	17	Non	209.95	209.95	0	3.71	1509	>sp|P02817|AMELX_BOVIN Amelogenin, X isoform OS=Bos taurus OX=9913 GN=AMELX PE=1 SV=2	1	hf1_10472_ebo_36_1_261219.ScanId;v=1;d1=23025.23025.4	controllerType=0 controllerNumber=1 scan=23025	50.0165
34404:4	1	S.MP[+15.995]LPPHPGHPGYINF[+31.990]SY[+31.990]EVLTPLKWYQSM[+15.995].I		F[+32], M[+16], P[+16], Y[+32]	874.657	4	3495.61	3495.64	0	-9.4	17	Non	220.69	220.69	1.8	2.75	1509	>sp|P02817|AMELX_BOVIN Amelogenin, X isoform OS=Bos taurus OX=9913 GN=AMELX PE=1 SV=2	1	hf1_10472_ebo_36_1_261219.ScanId;v=1;d1=25503.25503.4	controllerType=0 controllerNumber=1 scan=25503	54.5619
32650:4	1	S.MP[+15.995]LPPHPGHPGYINF[+31.990]SY[+31.990]EVLTPLKWYQSM[+15.995].I		F[+32], M[+16], P[+16], Y[+32]	874.669	4	3495.65	3495.64	0	4.1	17	Non	292.95	292.95	1.8	5.2	1509	>sp|P02817|AMELX_BOVIN Amelogenin, X isoform OS=Bos taurus OX=9913 GN=AMELX PE=1 SV=2	1	hf1_10472_ebo_36_1_261219.ScanId;v=1;d1=24358.24358.4	controllerType=0 controllerNumber=1 scan=24358	52.4464
33205:4	1	S.MPLPPHPGHP[+15.995]GYINF[+31.990]SY[+31.990]EVLTPLKWYQSM[+15.995].I		F[+32], M[+16], P[+16], Y[+32]	874.669	4	3495.65	3495.64	0	3.9	17	Non	295.8	295.8	0	5.2	1509	>sp|P02817|AMELX_BOVIN Amelogenin, X isoform OS=Bos taurus OX=9913 GN=AMELX PE=1 SV=2	1	hf1_10472_ebo_36_1_261219.ScanId;v=1;d1=24730.24730.4	controllerType=0 controllerNumber=1 scan=24730	53.1381
32357:3	1	S.MP[+15.995]LPPHPGHPGYIN[+0.984]FS[+79.966]YEVLTPLKWYQSM[+31.990].I		M[+32], N[+1], P[+16], S[+80]	1176.88	3	3528.63	3528.6	0	7.3	17	Non	312.02	312.02	4	5.88	1509	>sp|P02817|AMELX_BOVIN Amelogenin, X isoform OS=Bos taurus OX=9913 GN=AMELX PE=1 SV=2	1	hf1_10472_ebo_36_1_261219.ScanId;v=1;d1=24162.24162.3	controllerType=0 controllerNumber=1 scan=24162	52.0842
32058:3	1	S.M[+31.990]PLPPHPGHPGYINFS[+79.966]YEVLTPLKWYQ[+0.984]SM[+15.995].I		M[+16][+32], Q[+1], S[+80]	1176.88	3	3528.63	3528.6	0	6.4	17	Non	336.43	336.43	0	6.04	1509	>sp|P02817|AMELX_BOVIN Amelogenin, X isoform OS=Bos taurus OX=9913 GN=AMELX PE=1 SV=2	1	hf1_10472_ebo_36_1_261219.ScanId;v=1;d1=23972.23972.3	controllerType=0 controllerNumber=1 scan=23972	51.7338
30540:3	1	S.MP[+15.995]LPPHPGHPGYINFS[+79.966]YEVLTPLKWY[+31.990]Q[+0.984]SM.I		P[+16], Q[+1], S[+80], Y[+32]	1176.88	3	3528.63	3528.6	0	6.8	17	Non	358.43	358.43	0	6.26	1509	>sp|P02817|AMELX_BOVIN Amelogenin, X isoform OS=Bos taurus OX=9913 GN=AMELX PE=1 SV=2	1	hf1_10472_ebo_36_1_261219.ScanId;v=1;d1=22977.22977.3	controllerType=0 controllerNumber=1 scan=22977	49.93
31699:3	1	S.MP[+15.995]LPPHPGHPGYINFS[+79.966]YEVLTPLKWYQ[+0.984]SM[+31.990].I		M[+32], P[+16], Q[+1], S[+80]	1176.88	3	3528.64	3528.6	0	9.3	17	Non	358.74	358.74	2.77	5.61	1509	>sp|P02817|AMELX_BOVIN Amelogenin, X isoform OS=Bos taurus OX=9913 GN=AMELX PE=1 SV=2	1	hf1_10472_ebo_36_1_261219.ScanId;v=1;d1=23744.23744.3	controllerType=0 controllerNumber=1 scan=23744	51.3195
30220:3	1	S.M[+15.995]PLPPHPGHPGYINFS[+79.966]YEVLTPLKW[+31.990]YQSM[+15.995].I		M[+16]*2, S[+80], W[+32]	1181.88	3	3543.64	3543.62	0	6.3	17	Non	367.81	367.81	0	7.23	1509	>sp|P02817|AMELX_BOVIN Amelogenin, X isoform OS=Bos taurus OX=9913 GN=AMELX PE=1 SV=2	1	hf1_10472_ebo_36_1_261219.ScanId;v=1;d1=22772.22772.3	controllerType=0 controllerNumber=1 scan=22772	49.5609
33495:4	1	S.MP[+15.995]LPPHPGHPGYINF[+31.990]SY[+31.990]EVLTPLKWYQSM[+15.995].I		F[+32], M[+16], P[+16], Y[+32]	874.664	4	3495.64	3495.64	0	-0.9	17	Non	418.62	418.62	1.8	6.23	1509	>sp|P02817|AMELX_BOVIN Amelogenin, X isoform OS=Bos taurus OX=9913 GN=AMELX PE=1 SV=2	1	hf1_10472_ebo_36_1_261219.ScanId;v=1;d1=24915.24915.4	controllerType=0 controllerNumber=1 scan=24915	53.4817
30818:3	1	S.M[+15.995]PLPPHPGHPGYINFS[+79.966]YEVLTPLKW[+31.990]YQ[+0.984]SM.I		M[+16], Q[+1], S[+80], W[+32]	1176.88	3	3528.63	3528.6	0	8.6	17	Non	621.82	621.82	0	8.67	1509	>sp|P02817|AMELX_BOVIN Amelogenin, X isoform OS=Bos taurus OX=9913 GN=AMELX PE=1 SV=2	1	hf1_10472_ebo_36_1_261219.ScanId;v=1;d1=23163.23163.3	controllerType=0 controllerNumber=1 scan=23163	50.2711
35604:4	1	S.M[+15.995]PLPPHPGHPGYINFS[+79.966]YEVLTPLKWYQSM[+15.995]I.R		M[+16]*2, S[+80]	906.934	4	3624.71	3624.71	0	1.1	17	Non	110.06	93.53	0	2.28	1509	>sp|P02817|AMELX_BOVIN Amelogenin, X isoform OS=Bos taurus OX=9913 GN=AMELX PE=1 SV=2	1	hf1_10472_ebo_36_1_261219.ScanId;v=1;d1=26262.26262.8	controllerType=0 controllerNumber=1 scan=26262	55.9445
33842:5	1	S.MP[+15.995]LPPHPGHPGYINFSYEVLTPLKWYQSMIR.H		P[+16]	737.771	5	3684.83	3684.85	0	-6.5	17	NRagged	24.86	24.86	4	1.33	1509	>sp|P02817|AMELX_BOVIN Amelogenin, X isoform OS=Bos taurus OX=9913 GN=AMELX PE=1 SV=2	1	hf1_10472_ebo_36_1_261219.ScanId;v=1;d1=25142.25142.5	controllerType=0 controllerNumber=1 scan=25142	53.8998
32102:5	1	S.MPLPPHPGHPGYINFSYEVLTPLKWYQSM[+15.995]IR.H		M[+16]	737.777	5	3684.86	3684.85	0	1.8	17	NRagged	313.97	313.97	23.03	6.05	1509	>sp|P02817|AMELX_BOVIN Amelogenin, X isoform OS=Bos taurus OX=9913 GN=AMELX PE=1 SV=2	1	hf1_10472_ebo_36_1_261219.ScanId;v=1;d1=24001.24001.5	controllerType=0 controllerNumber=1 scan=24001	51.7864
36777:4	1	S.MP[+15.995]LPPHPGHPGYINFS[+79.966]YEVLTPLKWYQSMIR.H		P[+16], S[+80]	941.959	4	3764.81	3764.82	0	-0.7	17	NRagged	116.91	116.91	4	2.66	1509	>sp|P02817|AMELX_BOVIN Amelogenin, X isoform OS=Bos taurus OX=9913 GN=AMELX PE=1 SV=2	1	hf1_10472_ebo_36_1_261219.ScanId;v=1;d1=26999.26999.4	controllerType=0 controllerNumber=1 scan=26999	57.2718
35746:5	1	S.MP[+15.995]LPPHPGHPGYINFS[+79.966]YEVLTPLKWYQSMIR.H		P[+16], S[+80]	753.773	5	3764.84	3764.82	0	5.9	17	NRagged	336.4	336.4	4	7.02	1509	>sp|P02817|AMELX_BOVIN Amelogenin, X isoform OS=Bos taurus OX=9913 GN=AMELX PE=1 SV=2	1	hf1_10472_ebo_36_1_261219.ScanId;v=1;d1=26354.26354.5	controllerType=0 controllerNumber=1 scan=26354	56.1125
32614:5	1	S.MPLPPHPGHPGYINFS[+79.966]YEVLTPLKWYQSM[+15.995]IR.H		M[+16], S[+80]	753.774	5	3764.84	3764.82	0	6	17	NRagged	399.58	399.58	0.21	7.93	1509	>sp|P02817|AMELX_BOVIN Amelogenin, X isoform OS=Bos taurus OX=9913 GN=AMELX PE=1 SV=2	1	hf1_10472_ebo_36_1_261219.ScanId;v=1;d1=24333.24333.5	controllerType=0 controllerNumber=1 scan=24333	52.3998
31020:4	1	S.M[+15.995]PLPPHPGHPGYINFSYEVLTPLKWYQSM[+15.995]IR.H		M[+16]*2	925.968	4	3700.85	3700.84	0	1.7	17	NRagged	475.27	475.27	0	7.47	1509	>sp|P02817|AMELX_BOVIN Amelogenin, X isoform OS=Bos taurus OX=9913 GN=AMELX PE=1 SV=2	1	hf1_10472_ebo_36_1_261219.ScanId;v=1;d1=23296.23296.4	controllerType=0 controllerNumber=1 scan=23296	50.5096
35819:4	1	S.M[+15.995]PLPPHPGHPGYINFS[+79.966]YEVLTPLKWYQSMIR.H		M[+16], S[+80]	941.967	4	3764.84	3764.82	0	7.7	17	NRagged	545.09	545.09	31.97	8.31	1509	>sp|P02817|AMELX_BOVIN Amelogenin, X isoform OS=Bos taurus OX=9913 GN=AMELX PE=1 SV=2	1	hf1_10472_ebo_36_1_261219.ScanId;v=1;d1=26405.26405.4	controllerType=0 controllerNumber=1 scan=26405	56.207
32826:4	1	S.MPLPPHPGHPGYINFS[+79.966]YEVLTPLKWYQSM[+15.995]IR.H		M[+16], S[+80]	941.964	4	3764.83	3764.82	0	4.7	17	NRagged	547.95	547.95	51.96	8.3	1509	>sp|P02817|AMELX_BOVIN Amelogenin, X isoform OS=Bos taurus OX=9913 GN=AMELX PE=1 SV=2	1	hf1_10472_ebo_36_1_261219.ScanId;v=1;d1=24475.24475.4	controllerType=0 controllerNumber=1 scan=24475	52.6661
33501:4	1	S.MPLPPHPGHPGYINFS[+79.966]YEVLTPLKWYQSM[+15.995]IR.H		M[+16], S[+80]	941.957	4	3764.81	3764.82	0	-2.2	17	NRagged	581.31	581.31	32.14	7.99	1509	>sp|P02817|AMELX_BOVIN Amelogenin, X isoform OS=Bos taurus OX=9913 GN=AMELX PE=1 SV=2	1	hf1_10472_ebo_36_1_261219.ScanId;v=1;d1=24920.24920.4	controllerType=0 controllerNumber=1 scan=24920	53.4921
32553:4	1	S.MPLPPHPGHPGYINFS[+79.966]YEVLTPLKWYQSM[+15.995]IR.H		M[+16], S[+80]	941.966	4	3764.84	3764.82	0	6.5	17	NRagged	1173.06	1173.06	60.37	21.59	1509	>sp|P02817|AMELX_BOVIN Amelogenin, X isoform OS=Bos taurus OX=9913 GN=AMELX PE=1 SV=2	1	hf1_10472_ebo_36_1_261219.ScanId;v=1;d1=24293.24293.4	controllerType=0 controllerNumber=1 scan=24293	52.325
37371:5	1	S.MP[+15.995]LPPHPGHPGYINFS[+79.966]YEVLTPLKWYQ[+0.984]SMIR.H		P[+16], Q[+1], S[+80]	753.971	5	3765.82	3765.8	0	6.7	17	NRagged	75.98	75.98	4	3.3	1509	>sp|P02817|AMELX_BOVIN Amelogenin, X isoform OS=Bos taurus OX=9913 GN=AMELX PE=1 SV=2	1	hf1_10472_ebo_36_1_261219.ScanId;v=1;d1=27359.27359.5	controllerType=0 controllerNumber=1 scan=27359	57.9156
31234:5	1	S.MPLP[+31.990]PHPGHPGYINFS[+79.966]YEVLTPLKWYQSM[+15.995]IR.H		M[+16], P[+32], S[+80]	760.173	5	3796.84	3796.81	0	8	17	NRagged	100.94	100.94	9.31	2.4	1509	>sp|P02817|AMELX_BOVIN Amelogenin, X isoform OS=Bos taurus OX=9913 GN=AMELX PE=1 SV=2	1	hf1_10472_ebo_36_1_261219.ScanId;v=1;d1=23438.23438.4	controllerType=0 controllerNumber=1 scan=23438	50.7632
28695:4	1	S.M[+15.995]PLPPHPGHPGYINFS[+79.966]YEVLTPLKWYQSM[+31.990]IR.H		M[+16][+32], S[+80]	949.964	4	3796.84	3796.81	0	7.8	17	NRagged	115.19	115.19	0	2.5	1509	>sp|P02817|AMELX_BOVIN Amelogenin, X isoform OS=Bos taurus OX=9913 GN=AMELX PE=1 SV=2	1	hf1_10472_ebo_36_1_261219.ScanId;v=1;d1=21818.21818.5	controllerType=0 controllerNumber=1 scan=21818	47.8437
33146:4	1	S.M[+15.995]PLPPHPGHPGYINFS[+79.966]YEVLTP[+31.990]LKWYQSMIR.H		M[+16], P[+32], S[+80]	949.963	4	3796.83	3796.81	0	6.5	17	NRagged	138.07	138.07	2.07	2.75	1509	>sp|P02817|AMELX_BOVIN Amelogenin, X isoform OS=Bos taurus OX=9913 GN=AMELX PE=1 SV=2	1	hf1_10472_ebo_36_1_261219.ScanId;v=1;d1=24689.24689.4	controllerType=0 controllerNumber=1 scan=24689	53.0616
30034:4	1	S.M[+15.995]PLPPHPGHPGYINFS[+79.966]YEVLTPLKWYQSM[+15.995]IR.H		M[+16]*2, S[+80]	945.961	4	3780.82	3780.81	0	3.5	17	NRagged	153.36	113.68	0	2.33	1509	>sp|P02817|AMELX_BOVIN Amelogenin, X isoform OS=Bos taurus OX=9913 GN=AMELX PE=1 SV=2	1	hf1_10472_ebo_36_1_261219.ScanId;v=1;d1=22653.22653.3	controllerType=0 controllerNumber=1 scan=22653	49.3444
29712:5	1	S.MP[+15.995]LPPHPGHPGYINFS[+79.966]YEVLTPLKWYQSM[+31.990]IR.H		M[+32], P[+16], S[+80]	760.17	5	3796.82	3796.81	0	4.7	17	NRagged	171.92	171.92	4	4.95	1509	>sp|P02817|AMELX_BOVIN Amelogenin, X isoform OS=Bos taurus OX=9913 GN=AMELX PE=1 SV=2	1	hf1_10472_ebo_36_1_261219.ScanId;v=1;d1=22449.22449.7	controllerType=0 controllerNumber=1 scan=22449	48.982
31018:5	1	S.M[+31.990]PLPPHPGHPGYINFS[+79.966]YEVLTPLKWYQSM[+15.995]IR.H		M[+16][+32], S[+80]	760.171	5	3796.83	3796.81	0	5.6	17	NRagged	231.54	231.54	0	4.99	1509	>sp|P02817|AMELX_BOVIN Amelogenin, X isoform OS=Bos taurus OX=9913 GN=AMELX PE=1 SV=2	1	hf1_10472_ebo_36_1_261219.ScanId;v=1;d1=23295.23295.5	controllerType=0 controllerNumber=1 scan=23295	50.5081
31993:4	1	S.M[+31.990]PLPPHPGHPGYINFS[+79.966]YEVLTPLKWYQSM[+15.995]IR.H		M[+16][+32], S[+80]	949.963	4	3796.83	3796.81	0	7	17	NRagged	287.53	287.53	0	6.66	1509	>sp|P02817|AMELX_BOVIN Amelogenin, X isoform OS=Bos taurus OX=9913 GN=AMELX PE=1 SV=2	1	hf1_10472_ebo_36_1_261219.ScanId;v=1;d1=23930.23930.4	controllerType=0 controllerNumber=1 scan=23930	51.6558
36648:4	1	S.MPLPPHPGHPGY[+31.990]INF[+31.990]SY[+15.995]EVLTPLKWYQSMIR.H		F[+32], Y[+16][+32]	937.964	4	3748.83	3748.83	0	1.3	17	NRagged	291.78	291.78	1.5	6.01	1509	>sp|P02817|AMELX_BOVIN Amelogenin, X isoform OS=Bos taurus OX=9913 GN=AMELX PE=1 SV=2	1	hf1_10472_ebo_36_1_261219.ScanId;v=1;d1=26919.26919.4	controllerType=0 controllerNumber=1 scan=26919	57.127
33779:5	1	S.MPLPPHPGHPGYIN[+0.984]FS[+79.966]YEVLTPLKWYQSM[+15.995]IR.H		M[+16], N[+1], S[+80]	753.97	5	3765.82	3765.8	0	5.9	17	NRagged	330.26	330.26	33.89	6.94	1509	>sp|P02817|AMELX_BOVIN Amelogenin, X isoform OS=Bos taurus OX=9913 GN=AMELX PE=1 SV=2	1	hf1_10472_ebo_36_1_261219.ScanId;v=1;d1=25097.25097.3	controllerType=0 controllerNumber=1 scan=25097	53.8144
30056:4	1	S.M[+15.995]PLPPHPGHPGYINFS[+79.966]YEVLTPLKWY[+31.990]QSMIR.H		M[+16], S[+80], Y[+32]	949.958	4	3796.81	3796.81	0	1.2	17	NRagged	371.62	371.62	0	7.3	1509	>sp|P02817|AMELX_BOVIN Amelogenin, X isoform OS=Bos taurus OX=9913 GN=AMELX PE=1 SV=2	1	hf1_10472_ebo_36_1_261219.ScanId;v=1;d1=22669.22669.4	controllerType=0 controllerNumber=1 scan=22669	49.3743
28334:5	1	S.MP[+15.995]LPPHPGHPGYINFS[+79.966]YEVLTPLKWY[+31.990]QSMIR.H		P[+16], S[+80], Y[+32]	760.169	5	3796.81	3796.81	0	2.4	17	NRagged	375.37	375.37	0	7.27	1509	>sp|P02817|AMELX_BOVIN Amelogenin, X isoform OS=Bos taurus OX=9913 GN=AMELX PE=1 SV=2	1	hf1_10472_ebo_36_1_261219.ScanId;v=1;d1=21587.21587.5	controllerType=0 controllerNumber=1 scan=21587	47.4322
28523:4	1	S.M[+15.995]PLPPHPGHPGYINFS[+79.966]YEVLTPLKW[+31.990]YQSMIR.H		M[+16], S[+80], W[+32]	949.96	4	3796.82	3796.81	0	2.9	17	NRagged	498.14	498.14	0	7.64	1509	>sp|P02817|AMELX_BOVIN Amelogenin, X isoform OS=Bos taurus OX=9913 GN=AMELX PE=1 SV=2	1	hf1_10472_ebo_36_1_261219.ScanId;v=1;d1=21709.21709.4	controllerType=0 controllerNumber=1 scan=21709	47.6478
30949:4	1	S.M[+15.995]PLPPHPGHPGYINFS[+79.966]YEVLTPLKW[+31.990]YQSMIR.H		M[+16], S[+80], W[+32]	949.961	4	3796.82	3796.81	0	4.1	17	NRagged	512.42	512.42	0	7.58	1509	>sp|P02817|AMELX_BOVIN Amelogenin, X isoform OS=Bos taurus OX=9913 GN=AMELX PE=1 SV=2	1	hf1_10472_ebo_36_1_261219.ScanId;v=1;d1=23249.23249.4	controllerType=0 controllerNumber=1 scan=23249	50.4243
34975:4	1	S.MPLPPHPGHPGYINFS[+79.966]YEVLTPLKWYQ[+0.984]SM[+15.995]IR.H		M[+16], Q[+1], S[+80]	942.207	4	3765.81	3765.8	0	1.8	17	NRagged	633.97	633.97	34.2	9.94	1509	>sp|P02817|AMELX_BOVIN Amelogenin, X isoform OS=Bos taurus OX=9913 GN=AMELX PE=1 SV=2	1	hf1_10472_ebo_36_1_261219.ScanId;v=1;d1=25864.25864.4	controllerType=0 controllerNumber=1 scan=25864	55.2277
31188:5	1	S.M[+15.995]PLPPHPGHPGYINFS[+79.966]YEVLTPLKWYQSM[+15.995]IR.H		M[+16]*2, S[+80]	756.972	5	3780.83	3780.81	0	5	17	NRagged	651.48	651.48	0	11.43	1509	>sp|P02817|AMELX_BOVIN Amelogenin, X isoform OS=Bos taurus OX=9913 GN=AMELX PE=1 SV=2	1	hf1_10472_ebo_36_1_261219.ScanId;v=1;d1=23407.23407.5	controllerType=0 controllerNumber=1 scan=23407	50.7079
37422:4	1	S.M[+15.995]PLPPHPGHPGYINFS[+79.966]YEVLTPLKWYQ[+0.984]SMIR.H		M[+16], Q[+1], S[+80]	942.212	4	3765.83	3765.8	0	7.3	17	NRagged	651.58	651.58	36.38	11.59	1509	>sp|P02817|AMELX_BOVIN Amelogenin, X isoform OS=Bos taurus OX=9913 GN=AMELX PE=1 SV=2	1	hf1_10472_ebo_36_1_261219.ScanId;v=1;d1=27390.27390.4	controllerType=0 controllerNumber=1 scan=27390	57.9712
28223:4	1	S.M[+15.995]PLPPHPGHPGYINFS[+79.966]YEVLTPLKWYQSM[+31.990]IR.H		M[+16][+32], S[+80]	949.963	4	3796.83	3796.81	0	6	17	NRagged	736.76	736.76	0	12.67	1509	>sp|P02817|AMELX_BOVIN Amelogenin, X isoform OS=Bos taurus OX=9913 GN=AMELX PE=1 SV=2	1	hf1_10472_ebo_36_1_261219.ScanId;v=1;d1=21513.21513.4	controllerType=0 controllerNumber=1 scan=21513	47.3006
31495:5	1	S.M[+15.995]PLPPHPGHPGYINFS[+79.966]YEVLTPLKWYQSM[+15.995]IR.H		M[+16]*2, S[+80]	756.971	5	3780.82	3780.81	0	3.7	17	NRagged	769.7	769.7	0	12.91	1509	>sp|P02817|AMELX_BOVIN Amelogenin, X isoform OS=Bos taurus OX=9913 GN=AMELX PE=1 SV=2	1	hf1_10472_ebo_36_1_261219.ScanId;v=1;d1=23606.23606.5	controllerType=0 controllerNumber=1 scan=23606	51.0646
31133:4	1	S.M[+15.995]PLPPHPGHPGYINFS[+79.966]YEVLTPLKWYQSM[+15.995]IR.H		M[+16]*2, S[+80]	945.965	4	3780.84	3780.81	0	7	17	NRagged	814.91	814.91	9.7	14.59	1509	>sp|P02817|AMELX_BOVIN Amelogenin, X isoform OS=Bos taurus OX=9913 GN=AMELX PE=1 SV=2	1	hf1_10472_ebo_36_1_261219.ScanId;v=1;d1=23367.23367.4	controllerType=0 controllerNumber=1 scan=23367	50.6339
29552:4	1	S.M[+15.995]PLPPHPGHPGYINFS[+79.966]YEVLTPLKWYQSM[+31.990]IR.H		M[+16][+32], S[+80]	949.962	4	3796.82	3796.81	0	5.1	17	NRagged	917.51	917.51	0	16.67	1509	>sp|P02817|AMELX_BOVIN Amelogenin, X isoform OS=Bos taurus OX=9913 GN=AMELX PE=1 SV=2	1	hf1_10472_ebo_36_1_261219.ScanId;v=1;d1=22348.22348.4	controllerType=0 controllerNumber=1 scan=22348	48.8035
33790:4	1	S.MPLPPHPGHPGYINFS[+79.966]YEVLTPLKWYQ[+0.984]SM[+15.995]IR.H		M[+16], Q[+1], S[+80]	942.212	4	3765.83	3765.8	0	7.2	17	NRagged	937.51	937.51	22.73	16.59	1509	>sp|P02817|AMELX_BOVIN Amelogenin, X isoform OS=Bos taurus OX=9913 GN=AMELX PE=1 SV=2	1	hf1_10472_ebo_36_1_261219.ScanId;v=1;d1=25106.25106.4	controllerType=0 controllerNumber=1 scan=25106	53.8337
34082:4	1	S.MPLPPHPGHPGYINFS[+79.966]YEVLTPLKWYQ[+0.984]SM[+15.995]IR.H		M[+16], Q[+1], S[+80]	942.213	4	3765.83	3765.8	0	7.6	17	NRagged	960.95	960.95	35.49	17.59	1509	>sp|P02817|AMELX_BOVIN Amelogenin, X isoform OS=Bos taurus OX=9913 GN=AMELX PE=1 SV=2	1	hf1_10472_ebo_36_1_261219.ScanId;v=1;d1=25296.25296.4	controllerType=0 controllerNumber=1 scan=25296	54.1851
31223:3	1	S.M[+15.995]PLPPHPGHPGYINFS[+79.966]YEVLTPLKWYQSM[+15.995]IR.H		M[+16]*2, S[+80]	1260.95	3	3780.83	3780.81	0	5.5	17	NRagged	1026.81	1026.81	0	17.99	1509	>sp|P02817|AMELX_BOVIN Amelogenin, X isoform OS=Bos taurus OX=9913 GN=AMELX PE=1 SV=2	1	hf1_10472_ebo_36_1_261219.ScanId;v=1;d1=23432.23432.3	controllerType=0 controllerNumber=1 scan=23432	50.7513
31713:4	1	S.M[+15.995]PLPPHPGHPGYINFS[+79.966]YEVLTPLKWYQSM[+15.995]IR.H		M[+16]*2, S[+80]	945.961	4	3780.82	3780.81	0	2.6	17	NRagged	1068.2	1068.2	12.47	19.15	1509	>sp|P02817|AMELX_BOVIN Amelogenin, X isoform OS=Bos taurus OX=9913 GN=AMELX PE=1 SV=2	1	hf1_10472_ebo_36_1_261219.ScanId;v=1;d1=23753.23753.4	controllerType=0 controllerNumber=1 scan=23753	51.3358
31426:4	1	S.M[+15.995]PLPPHPGHPGYINFS[+79.966]YEVLTPLKWYQSM[+15.995]IR.H		M[+16]*2, S[+80]	945.963	4	3780.83	3780.81	0	5.2	17	NRagged	1317.2	1317.2	30.67	24.67	1509	>sp|P02817|AMELX_BOVIN Amelogenin, X isoform OS=Bos taurus OX=9913 GN=AMELX PE=1 SV=2	1	hf1_10472_ebo_36_1_261219.ScanId;v=1;d1=23561.23561.4	controllerType=0 controllerNumber=1 scan=23561	50.9855
32111:4	1	S.MP[+15.995]LPPHPGHPGYINFS[+79.966]YEVLTP[+31.990]LKWY[+15.995]QSMIR.H		P[+16][+32], S[+80], Y[+16]	953.96	4	3812.82	3812.8	0	4.3	17	NRagged	1.22	1.22	0	2.21	1509	>sp|P02817|AMELX_BOVIN Amelogenin, X isoform OS=Bos taurus OX=9913 GN=AMELX PE=1 SV=2	1	hf1_10472_ebo_36_1_261219.ScanId;v=1;d1=24005.24005.4	controllerType=0 controllerNumber=1 scan=24005	51.7925
32476:4	1	S.MP[+15.995]LPPHPGHPGYINFS[+79.966]YEVLTPLKW[+31.990]Y[+15.995]QSMIR.H		P[+16], S[+80], W[+32], Y[+16]	953.96	4	3812.82	3812.8	0	4.3	17	NRagged	18.89	18.89	0.88	2.22	1509	>sp|P02817|AMELX_BOVIN Amelogenin, X isoform OS=Bos taurus OX=9913 GN=AMELX PE=1 SV=2	1	hf1_10472_ebo_36_1_261219.ScanId;v=1;d1=24244.24244.4	controllerType=0 controllerNumber=1 scan=24244	52.2339
30241:4	1	S.M[+15.995]PLPPHPGHPGYINFS[+79.966]YEVLTP[+31.990]LK[+15.995]WYQSMIR.H		K[+16], M[+16], P[+32], S[+80]	953.956	4	3812.8	3812.8	0	0.9	17	NRagged	19.89	19.89	13.63	2.24	1509	>sp|P02817|AMELX_BOVIN Amelogenin, X isoform OS=Bos taurus OX=9913 GN=AMELX PE=1 SV=2	1	hf1_10472_ebo_36_1_261219.ScanId;v=1;d1=22785.22785.4	controllerType=0 controllerNumber=1 scan=22785	49.5862
32692:4	1	S.M[+15.995]PLPPHPGHP[+31.990]GYINFS[+79.966]Y[+15.995]EVLTPLKWYQSMIR.H		M[+16], P[+32], S[+80], Y[+16]	953.957	4	3812.8	3812.8	0	1.2	17	NRagged	22.9	22.9	0	1.19	1509	>sp|P02817|AMELX_BOVIN Amelogenin, X isoform OS=Bos taurus OX=9913 GN=AMELX PE=1 SV=2	1	hf1_10472_ebo_36_1_261219.ScanId;v=1;d1=24385.24385.4	controllerType=0 controllerNumber=1 scan=24385	52.4988
32407:4	1	S.MP[+15.995]LPPHPGHPGYINFS[+79.966]YEVLTP[+31.990]LKWY[+15.995]QSMIR.H		P[+16][+32], S[+80], Y[+16]	953.958	4	3812.81	3812.8	0	3	17	NRagged	49.44	49.44	4	2.21	1509	>sp|P02817|AMELX_BOVIN Amelogenin, X isoform OS=Bos taurus OX=9913 GN=AMELX PE=1 SV=2	1	hf1_10472_ebo_36_1_261219.ScanId;v=1;d1=24200.24200.4	controllerType=0 controllerNumber=1 scan=24200	52.1531
30838:4	1	S.M[+15.995]PLPPHPGHPGYINFS[+79.966]YEVLTP[+15.995]LKWY[+31.990]QSMIR.H		M[+16], P[+16], S[+80], Y[+32]	953.958	4	3812.81	3812.8	0	2.9	17	NRagged	106.18	106.18	0	2.86	1509	>sp|P02817|AMELX_BOVIN Amelogenin, X isoform OS=Bos taurus OX=9913 GN=AMELX PE=1 SV=2	1	hf1_10472_ebo_36_1_261219.ScanId;v=1;d1=23176.23176.4	controllerType=0 controllerNumber=1 scan=23176	50.2936
33733:4	1	S.M[+31.990]PLPPHPGHPGYINFS[+79.966]YEVLTPLKWYQ[+0.984]SM[+15.995]IR.H		M[+16][+32], Q[+1], S[+80]	950.206	4	3797.8	3797.79	0	3.4	17	NRagged	130.16	130.16	0	2.48	1509	>sp|P02817|AMELX_BOVIN Amelogenin, X isoform OS=Bos taurus OX=9913 GN=AMELX PE=1 SV=2	1	hf1_10472_ebo_36_1_261219.ScanId;v=1;d1=25070.25070.4	controllerType=0 controllerNumber=1 scan=25070	53.765
31348:4	1	S.M[+15.995]PLPPHPGHPGYINFS[+79.966]Y[+31.990]EVLTPLKWYQSM[+15.995]IR.H		M[+16]*2, S[+80], Y[+32]	953.965	4	3812.84	3812.8	0	9.6	17	NRagged	134.82	134.82	0	3.03	1509	>sp|P02817|AMELX_BOVIN Amelogenin, X isoform OS=Bos taurus OX=9913 GN=AMELX PE=1 SV=2	1	hf1_10472_ebo_36_1_261219.ScanId;v=1;d1=23510.23510.4	controllerType=0 controllerNumber=1 scan=23510	50.8888
29433:4	1	S.M[+15.995]PLPPHPGHPGYINFS[+79.966]YEVLTP[+31.990]LKWYQSM[+15.995]IR.H		M[+16]*2, P[+32], S[+80]	953.96	4	3812.82	3812.8	0	4.4	17	NRagged	161.23	161.23	0	4.73	1509	>sp|P02817|AMELX_BOVIN Amelogenin, X isoform OS=Bos taurus OX=9913 GN=AMELX PE=1 SV=2	1	hf1_10472_ebo_36_1_261219.ScanId;v=1;d1=22272.22272.4	controllerType=0 controllerNumber=1 scan=22272	48.6658
29759:4	1	S.M[+15.995]PLPPHPGHPGYINFS[+79.966]YEVLTP[+15.995]LKWY[+31.990]QSMIR.H		M[+16], P[+16], S[+80], Y[+32]	953.958	4	3812.81	3812.8	0	2.7	17	NRagged	170.32	170.32	0	4.21	1509	>sp|P02817|AMELX_BOVIN Amelogenin, X isoform OS=Bos taurus OX=9913 GN=AMELX PE=1 SV=2	1	hf1_10472_ebo_36_1_261219.ScanId;v=1;d1=22476.22476.4	controllerType=0 controllerNumber=1 scan=22476	49.0285
29318:5	1	S.MP[+15.995]LPPHPGHPGYIN[+0.984]FS[+79.966]YEVLTPLKWYQSM[+31.990]IR.H		M[+32], N[+1], P[+16], S[+80]	760.37	5	3797.82	3797.79	0	8.3	17	NRagged	182.85	182.85	0	4.22	1509	>sp|P02817|AMELX_BOVIN Amelogenin, X isoform OS=Bos taurus OX=9913 GN=AMELX PE=1 SV=2	1	hf1_10472_ebo_36_1_261219.ScanId;v=1;d1=22204.22204.5	controllerType=0 controllerNumber=1 scan=22204	48.5428
34066:5	1	S.MPLPPHPGHPGY[+15.995]INF[+31.990]SY[+31.990]EVLTPLKWY[+15.995]QSMIR.H		F[+32], Y[+16]*2[+32]	753.768	5	3764.81	3764.82	0	-3.8	17	NRagged	186.75	186.75	1.97	3.76	1509	>sp|P02817|AMELX_BOVIN Amelogenin, X isoform OS=Bos taurus OX=9913 GN=AMELX PE=1 SV=2	1	hf1_10472_ebo_36_1_261219.ScanId;v=1;d1=25287.25287.5	controllerType=0 controllerNumber=1 scan=25287	54.1685
33117:4	1	S.MP[+15.995]LPPHPGHPGYINF[+31.990]SY[+31.990]EVLTPLKWYQSM[+15.995]IR.H		F[+32], M[+16], P[+16], Y[+32]	941.961	4	3764.82	3764.82	0	-0.6	17	NRagged	197.94	197.94	1.8	4.39	1509	>sp|P02817|AMELX_BOVIN Amelogenin, X isoform OS=Bos taurus OX=9913 GN=AMELX PE=1 SV=2	1	hf1_10472_ebo_36_1_261219.ScanId;v=1;d1=24671.24671.4	controllerType=0 controllerNumber=1 scan=24671	53.0288
28216:4	1	S.M[+15.995]PLPPHPGHPGYINFS[+79.966]YEVLTPLKW[+31.990]YQSM[+15.995]IR.H		M[+16]*2, S[+80], W[+32]	953.963	4	3812.83	3812.8	0	8	17	NRagged	207.36	207.36	0	5.16	1509	>sp|P02817|AMELX_BOVIN Amelogenin, X isoform OS=Bos taurus OX=9913 GN=AMELX PE=1 SV=2	1	hf1_10472_ebo_36_1_261219.ScanId;v=1;d1=21509.21509.4	controllerType=0 controllerNumber=1 scan=21509	47.2945
29239:4	1	S.M[+15.995]PLPPHPGHPGYIN[+0.984]FS[+79.966]YEVLTPLKWYQSM[+31.990]IR.H		M[+16][+32], N[+1], S[+80]	950.208	4	3797.81	3797.79	0	5.9	17	NRagged	210.18	210.18	0	5.23	1509	>sp|P02817|AMELX_BOVIN Amelogenin, X isoform OS=Bos taurus OX=9913 GN=AMELX PE=1 SV=2	1	hf1_10472_ebo_36_1_261219.ScanId;v=1;d1=22155.22155.4	controllerType=0 controllerNumber=1 scan=22155	48.4545
34379:4	1	S.MP[+15.995]LPPHPGHPGYINF[+31.990]SY[+31.990]EVLTPLKWYQSM[+15.995]IR.H		F[+32], M[+16], P[+16], Y[+32]	941.955	4	3764.8	3764.82	0	-6.5	17	NRagged	220.18	220.18	1.8	3.35	1509	>sp|P02817|AMELX_BOVIN Amelogenin, X isoform OS=Bos taurus OX=9913 GN=AMELX PE=1 SV=2	1	hf1_10472_ebo_36_1_261219.ScanId;v=1;d1=25487.25487.4	controllerType=0 controllerNumber=1 scan=25487	54.5348
32266:4	1	S.MPLPPHPGHP[+15.995]GYINF[+31.990]SY[+31.990]EVLTPLKWY[+15.995]QSMIR.H		F[+32], P[+16], Y[+16][+32]	941.97	4	3764.86	3764.82	0	9.4	17	NRagged	232.53	232.53	2.64	4.51	1509	>sp|P02817|AMELX_BOVIN Amelogenin, X isoform OS=Bos taurus OX=9913 GN=AMELX PE=1 SV=2	1	hf1_10472_ebo_36_1_261219.ScanId;v=1;d1=24102.24102.4	controllerType=0 controllerNumber=1 scan=24102	51.9706
32285:4	1	S.M[+15.995]PLPPHPGHPGYINFS[+79.966]YEVLTPLKWY[+31.990]Q[+0.984]SMIR.H		M[+16], Q[+1], S[+80], Y[+32]	950.208	4	3797.81	3797.79	0	5.9	17	NRagged	255.32	255.32	0	6.57	1509	>sp|P02817|AMELX_BOVIN Amelogenin, X isoform OS=Bos taurus OX=9913 GN=AMELX PE=1 SV=2	1	hf1_10472_ebo_36_1_261219.ScanId;v=1;d1=24116.24116.4	controllerType=0 controllerNumber=1 scan=24116	52.0003
31677:4	1	S.M[+15.995]PLPPHPGHPGYINFS[+79.966]YEVLTP[+31.990]LKWYQ[+0.984]SMIR.H		M[+16], P[+32], Q[+1], S[+80]	950.209	4	3797.81	3797.79	0	6.4	17	NRagged	291.8	291.8	3.06	6.66	1509	>sp|P02817|AMELX_BOVIN Amelogenin, X isoform OS=Bos taurus OX=9913 GN=AMELX PE=1 SV=2	1	hf1_10472_ebo_36_1_261219.ScanId;v=1;d1=23731.23731.4	controllerType=0 controllerNumber=1 scan=23731	51.297
30352:4	1	S.M[+15.995]PLPPHPGHPGYIN[+0.984]FS[+79.966]YEVLTPLKWYQSM[+31.990]IR.H		M[+16][+32], N[+1], S[+80]	950.208	4	3797.81	3797.79	0	5.3	17	NRagged	420.02	420.02	0	8.05	1509	>sp|P02817|AMELX_BOVIN Amelogenin, X isoform OS=Bos taurus OX=9913 GN=AMELX PE=1 SV=2	1	hf1_10472_ebo_36_1_261219.ScanId;v=1;d1=22862.22862.4	controllerType=0 controllerNumber=1 scan=22862	49.7281
34021:4	1	S.M[+15.995]PLPPHPGHPGYINFS[+79.966]YEVLTPLKWYQ[+0.984]SM[+31.990]IR.H		M[+16][+32], Q[+1], S[+80]	950.207	4	3797.81	3797.79	0	4.4	17	NRagged	426.25	426.25	16.6	8.05	1509	>sp|P02817|AMELX_BOVIN Amelogenin, X isoform OS=Bos taurus OX=9913 GN=AMELX PE=1 SV=2	1	hf1_10472_ebo_36_1_261219.ScanId;v=1;d1=25259.25259.4	controllerType=0 controllerNumber=1 scan=25259	54.1174
32856:4	1	S.M[+15.995]PLPPHPGHPGYINFS[+79.966]YEVLTPLKWYQ[+0.984]SM[+31.990]IR.H		M[+16][+32], Q[+1], S[+80]	950.207	4	3797.81	3797.79	0	4.8	17	NRagged	443.27	443.27	0	8.07	1509	>sp|P02817|AMELX_BOVIN Amelogenin, X isoform OS=Bos taurus OX=9913 GN=AMELX PE=1 SV=2	1	hf1_10472_ebo_36_1_261219.ScanId;v=1;d1=24496.24496.4	controllerType=0 controllerNumber=1 scan=24496	52.7036
32572:4	1	S.M[+15.995]PLPPHPGHPGYIN[+0.984]FS[+79.966]YEVLTPLKWYQSM[+31.990]IR.H		M[+16][+32], N[+1], S[+80]	950.208	4	3797.81	3797.79	0	6	17	NRagged	505.24	505.24	0	8.11	1509	>sp|P02817|AMELX_BOVIN Amelogenin, X isoform OS=Bos taurus OX=9913 GN=AMELX PE=1 SV=2	1	hf1_10472_ebo_36_1_261219.ScanId;v=1;d1=24305.24305.4	controllerType=0 controllerNumber=1 scan=24305	52.3459
30650:4	1	S.M[+15.995]PLPPHPGHPGYINFS[+79.966]YEVLTPLKW[+31.990]YQ[+0.984]SMIR.H		M[+16], Q[+1], S[+80], W[+32]	950.209	4	3797.81	3797.79	0	6.2	17	NRagged	721.61	721.61	10.03	12.67	1509	>sp|P02817|AMELX_BOVIN Amelogenin, X isoform OS=Bos taurus OX=9913 GN=AMELX PE=1 SV=2	1	hf1_10472_ebo_36_1_261219.ScanId;v=1;d1=23053.23053.4	controllerType=0 controllerNumber=1 scan=23053	50.0675
30883:4	1	S.M[+15.995]PLPPHPGHPGYINFS[+79.966]YEVLTPLK[+15.995]WYQSMIRH.P		K[+16], M[+16], S[+80]	980.226	4	3917.88	3917.87	0	3.6	17	Non	177.61	142.29	4.28	2.49	1509	>sp|P02817|AMELX_BOVIN Amelogenin, X isoform OS=Bos taurus OX=9913 GN=AMELX PE=1 SV=2	1	hf1_10472_ebo_36_1_261219.ScanId;v=1;d1=23203.23203.4	controllerType=0 controllerNumber=1 scan=23203	50.3402
29677:6	1	S.MP[+15.995]LPPHPGHPGYINFS[+79.966]YEVLTPLKWYQSM[+15.995]IRH.P		M[+16], P[+16], S[+80]	653.819	6	3917.88	3917.87	0	2.7	17	Non	206.19	206.19	0	4.18	1509	>sp|P02817|AMELX_BOVIN Amelogenin, X isoform OS=Bos taurus OX=9913 GN=AMELX PE=1 SV=2	1	hf1_10472_ebo_36_1_261219.ScanId;v=1;d1=22426.22426.6	controllerType=0 controllerNumber=1 scan=22426	48.9415
29613:5	1	S.MP[+15.995]LPPHPGHPGYINFS[+79.966]YEVLTPLKWYQSM[+15.995]IRH.P		M[+16], P[+16], S[+80]	784.384	5	3917.89	3917.87	0	5	17	Non	326.89	326.89	0	6.82	1509	>sp|P02817|AMELX_BOVIN Amelogenin, X isoform OS=Bos taurus OX=9913 GN=AMELX PE=1 SV=2	1	hf1_10472_ebo_36_1_261219.ScanId;v=1;d1=22384.22384.5	controllerType=0 controllerNumber=1 scan=22384	48.8665
29663:4	1	S.M[+15.995]PLPPHPGHPGYINFS[+79.966]YEVLTPLKWYQSM[+15.995]IRH.P		M[+16]*2, S[+80]	980.228	4	3917.89	3917.87	0	5.5	17	Non	430.2	430.2	8.75	6.84	1509	>sp|P02817|AMELX_BOVIN Amelogenin, X isoform OS=Bos taurus OX=9913 GN=AMELX PE=1 SV=2	1	hf1_10472_ebo_36_1_261219.ScanId;v=1;d1=22417.22417.4	controllerType=0 controllerNumber=1 scan=22417	48.925
27822:5	1	S.MP[+15.995]LPPHPGHPGYINFSY[+15.995]EVLTPLKWYQSMIRHP.Y		P[+16], Y[+16]	787.803	5	3934.99	3934.96	0	7.6	17	Non	41.5	41.5	0.47	2.33	1509	>sp|P02817|AMELX_BOVIN Amelogenin, X isoform OS=Bos taurus OX=9913 GN=AMELX PE=1 SV=2	1	hf1_10472_ebo_36_1_261219.ScanId;v=1;d1=21267.21267.3	controllerType=0 controllerNumber=1 scan=21267	46.8528
29656:5	1	S.MP[+15.995]LPPHPGHPGYINFSYEVLTPLKWYQSMIRH[+15.995]P.Y		H[+16], P[+16]	787.802	5	3934.98	3934.96	0	6	17	Non	49.71	49.71	4	2.92	1509	>sp|P02817|AMELX_BOVIN Amelogenin, X isoform OS=Bos taurus OX=9913 GN=AMELX PE=1 SV=2	1	hf1_10472_ebo_36_1_261219.ScanId;v=1;d1=22411.22411.5	controllerType=0 controllerNumber=1 scan=22411	48.9131
30354:5	1	S.MP[+15.995]LPPHPGHPGYINFS[+79.966]YEVLTPLKWYQSMIRH[+15.995]P.Y		H[+16], P[+16], S[+80]	803.995	5	4015.95	4014.92	1	5.1	17	Non	111.96	111.96	0.4	3.04	1509	>sp|P02817|AMELX_BOVIN Amelogenin, X isoform OS=Bos taurus OX=9913 GN=AMELX PE=1 SV=2	1	hf1_10472_ebo_36_1_261219.ScanId;v=1;d1=22863.22863.5	controllerType=0 controllerNumber=1 scan=22863	49.7296
30768:5	1	S.M[+15.995]PLPPHPGHPGYINFS[+79.966]YEVLTPLKWYQSM[+15.995]IRHP.Y		M[+16]*2, S[+80]	803.995	5	4015.95	4014.92	1	4.9	17	Non	233.37	233.37	0	4.94	1509	>sp|P02817|AMELX_BOVIN Amelogenin, X isoform OS=Bos taurus OX=9913 GN=AMELX PE=1 SV=2	1	hf1_10472_ebo_36_1_261219.ScanId;v=1;d1=23130.23130.5	controllerType=0 controllerNumber=1 scan=23130	50.2069
31089:4	1	S.M[+15.995]PLPPHPGHPGYINFS[+79.966]YEVLTPLKWYQSM[+15.995]IRHP.Y		M[+16]*2, S[+80]	1004.49	4	4014.94	4014.92	0	3.2	17	Non	239.85	138.81	0	2.77	1509	>sp|P02817|AMELX_BOVIN Amelogenin, X isoform OS=Bos taurus OX=9913 GN=AMELX PE=1 SV=2	1	hf1_10472_ebo_36_1_261219.ScanId;v=1;d1=23336.23336.4	controllerType=0 controllerNumber=1 scan=23336	50.5785
30051:5	1	S.M[+15.995]PLPPHPGHPGYINFS[+79.966]YEVLTPLKWYQSM[+15.995]IRHP.Y		M[+16]*2, S[+80]	803.795	5	4014.95	4014.92	0	6	17	Non	267.31	267.31	0	6.27	1509	>sp|P02817|AMELX_BOVIN Amelogenin, X isoform OS=Bos taurus OX=9913 GN=AMELX PE=1 SV=2	1	hf1_10472_ebo_36_1_261219.ScanId;v=1;d1=22666.22666.5	controllerType=0 controllerNumber=1 scan=22666	49.3697
29749:5	1	S.M[+15.995]PLPPHPGHPGYINFS[+79.966]YEVLTPLKWYQSM[+15.995]IRHP.Y		M[+16]*2, S[+80]	803.594	5	4013.94	4014.92	-1	5.8	17	Non	323.22	323.22	0	7.26	1509	>sp|P02817|AMELX_BOVIN Amelogenin, X isoform OS=Bos taurus OX=9913 GN=AMELX PE=1 SV=2	1	hf1_10472_ebo_36_1_261219.ScanId;v=1;d1=22471.22471.5	controllerType=0 controllerNumber=1 scan=22471	49.021
31075:5	1	S.M[+15.995]PLPPHPGHPGYINFS[+79.966]YEVLTPLKWYQSM[+15.995]IRHP.Y		M[+16]*2, S[+80]	803.992	5	4015.93	4014.92	1	1.4	17	Non	422.2	422.2	0	7.16	1509	>sp|P02817|AMELX_BOVIN Amelogenin, X isoform OS=Bos taurus OX=9913 GN=AMELX PE=1 SV=2	1	hf1_10472_ebo_36_1_261219.ScanId;v=1;d1=23329.23329.5	controllerType=0 controllerNumber=1 scan=23329	50.5679
29826:4	1	S.M[+15.995]PLPPHPGHPGYINFS[+79.966]YEVLTPLKWYQSM[+15.995]IRHP.Y		M[+16]*2, S[+80]	1004.49	4	4014.94	4014.92	0	4.3	17	Non	450.96	450.96	0	7.09	1509	>sp|P02817|AMELX_BOVIN Amelogenin, X isoform OS=Bos taurus OX=9913 GN=AMELX PE=1 SV=2	1	hf1_10472_ebo_36_1_261219.ScanId;v=1;d1=22518.22518.4	controllerType=0 controllerNumber=1 scan=22518	49.1035
30835:5	1	S.MP[+15.995]LPPHPGHPGYINFSYEVLTP[+31.990]LKW[+31.990]YQSMIRH[+15.995]P.Y		H[+16], P[+16][+32], W[+32]	800.594	5	3998.94	3998.94	0	1.1	17	Non	63.97	63.97	4	2.23	1509	>sp|P02817|AMELX_BOVIN Amelogenin, X isoform OS=Bos taurus OX=9913 GN=AMELX PE=1 SV=2	1	hf1_10472_ebo_36_1_261219.ScanId;v=1;d1=23172.23172.4	controllerType=0 controllerNumber=1 scan=23172	50.2847
32009:6	1	S.MPLPPHPGHPGYINFSYEVLTPLKWYQSMIRHPYP.S			694.518	6	4162.07	4163.08	-1	-1.2	17	Non	40.42	40.42	40.42	2.24	1509	>sp|P02817|AMELX_BOVIN Amelogenin, X isoform OS=Bos taurus OX=9913 GN=AMELX PE=1 SV=2	1	hf1_10472_ebo_36_1_261219.ScanId;v=1;d1=23939.23939.6	controllerType=0 controllerNumber=1 scan=23939	51.6723
32303:6	1	S.MPLPPHPGHPGYINFSYEVLTPLKWYQSMIRHPYP.S			694.519	6	4162.08	4163.08	-1	-0.6	17	Non	139.35	133.21	133.21	2.84	1509	>sp|P02817|AMELX_BOVIN Amelogenin, X isoform OS=Bos taurus OX=9913 GN=AMELX PE=1 SV=2	1	hf1_10472_ebo_36_1_261219.ScanId;v=1;d1=24126.24126.6	controllerType=0 controllerNumber=1 scan=24126	52.0183
32083:5	1	S.MPLPPHPGHPGYINFSYEVLTPLKWYQSMIRHPYP.S			833.223	5	4162.09	4163.08	-1	2.2	17	Non	144.52	32.44	32.44	2.64	1509	>sp|P02817|AMELX_BOVIN Amelogenin, X isoform OS=Bos taurus OX=9913 GN=AMELX PE=1 SV=2	1	hf1_10472_ebo_36_1_261219.ScanId;v=1;d1=23987.23987.5	controllerType=0 controllerNumber=1 scan=23987	51.7594
29420:6	1	S.MP[+15.995]LPPHPGHPGYINFSYEVLTPLKWYQSMIRHPYP.S		P[+16]	697.184	6	4178.07	4179.08	-1	-0.8	17	Non	46.53	46.53	5.8	2.24	1509	>sp|P02817|AMELX_BOVIN Amelogenin, X isoform OS=Bos taurus OX=9913 GN=AMELX PE=1 SV=2	1	hf1_10472_ebo_36_1_261219.ScanId;v=1;d1=22265.22265.6	controllerType=0 controllerNumber=1 scan=22265	48.6551
33548:6	1	S.MPLPPHPGHPGYIN[+0.984]FSYEVLTPLKWYQSMIRHPYP.S		N[+1]	694.683	6	4163.06	4164.07	-1	-0.7	17	Non	93.38	93.38	3.04	2.57	1509	>sp|P02817|AMELX_BOVIN Amelogenin, X isoform OS=Bos taurus OX=9913 GN=AMELX PE=1 SV=2	1	hf1_10472_ebo_36_1_261219.ScanId;v=1;d1=24950.24950.6	controllerType=0 controllerNumber=1 scan=24950	53.5433
35352:6	1	S.MPLPPHPGHPGYINFSYEVLTPLKWYQ[+0.984]SMIRHPYP.S		Q[+1]	694.685	6	4163.08	4164.07	-1	3	17	Non	94.98	94.98	12.43	3.11	1509	>sp|P02817|AMELX_BOVIN Amelogenin, X isoform OS=Bos taurus OX=9913 GN=AMELX PE=1 SV=2	1	hf1_10472_ebo_36_1_261219.ScanId;v=1;d1=26103.26103.6	controllerType=0 controllerNumber=1 scan=26103	55.6612
30718:6	1	S.MPLPPHPGHPGYINFSYEVLTPLKWYQ[+0.984]SMIRHPYP.S		Q[+1]	694.855	6	4164.09	4164.07	0	6.7	17	Non	96.18	96.18	6.55	2.31	1509	>sp|P02817|AMELX_BOVIN Amelogenin, X isoform OS=Bos taurus OX=9913 GN=AMELX PE=1 SV=2	1	hf1_10472_ebo_36_1_261219.ScanId;v=1;d1=23095.23095.6	controllerType=0 controllerNumber=1 scan=23095	50.1427
29100:6	1	S.M[+15.995]PLPPHPGHPGYINFSYEVLTPLKWYQSMIRHPYP.S		M[+16]	697.352	6	4179.08	4179.08	0	-0.3	17	Non	127.8	48.57	7.97	2.22	1509	>sp|P02817|AMELX_BOVIN Amelogenin, X isoform OS=Bos taurus OX=9913 GN=AMELX PE=1 SV=2	1	hf1_10472_ebo_36_1_261219.ScanId;v=1;d1=22071.22071.6	controllerType=0 controllerNumber=1 scan=22071	48.3044
29178:4	1	S.M[+15.995]PLPPHPGHPGYINFSYEVLTPLKWYQSMIRHPYP.S		M[+16]	1045.78	4	4180.08	4179.08	1	-0.5	17	Non	136.08	136.08	10.2	2.38	1509	>sp|P02817|AMELX_BOVIN Amelogenin, X isoform OS=Bos taurus OX=9913 GN=AMELX PE=1 SV=2	1	hf1_10472_ebo_36_1_261219.ScanId;v=1;d1=22119.22119.4	controllerType=0 controllerNumber=1 scan=22119	48.3914
28058:4	1	S.M[+15.995]PLPPHPGHPGYINFSYEVLTPLKWYQSMIRHPYP.S		M[+16]	1045.27	4	4178.07	4179.08	-1	-0.8	17	Non	140.47	80.58	9.5	2.22	1509	>sp|P02817|AMELX_BOVIN Amelogenin, X isoform OS=Bos taurus OX=9913 GN=AMELX PE=1 SV=2	1	hf1_10472_ebo_36_1_261219.ScanId;v=1;d1=21413.21413.4	controllerType=0 controllerNumber=1 scan=21413	47.1171
30332:6	1	S.MP[+15.995]LPPHPGHPGYINFSYEVLTPLKWYQSMIRHPYP.S		P[+16]	697.188	6	4178.09	4179.08	-1	4.2	17	Non	144.98	144.98	4.32	3.07	1509	>sp|P02817|AMELX_BOVIN Amelogenin, X isoform OS=Bos taurus OX=9913 GN=AMELX PE=1 SV=2	1	hf1_10472_ebo_36_1_261219.ScanId;v=1;d1=22850.22850.6	controllerType=0 controllerNumber=1 scan=22850	49.7072
32430:6	1	S.MPLPPHPGHPGYINFSYEVLTPLKWYQSM[+15.995]IRHPYP.S		M[+16]	697.184	6	4178.07	4179.08	-1	-1.6	17	Non	151.87	151.87	7.24	3.23	1509	>sp|P02817|AMELX_BOVIN Amelogenin, X isoform OS=Bos taurus OX=9913 GN=AMELX PE=1 SV=2	1	hf1_10472_ebo_36_1_261219.ScanId;v=1;d1=24215.24215.6	controllerType=0 controllerNumber=1 scan=24215	52.1815
27661:5	1	S.M[+15.995]PLPPHPGHPGYINFSYEVLTPLKWYQSMIRHPYP.S		M[+16]	836.423	5	4178.09	4179.08	-1	3.3	17	Non	154.83	133.55	25	3.72	1509	>sp|P02817|AMELX_BOVIN Amelogenin, X isoform OS=Bos taurus OX=9913 GN=AMELX PE=1 SV=2	1	hf1_10472_ebo_36_1_261219.ScanId;v=1;d1=21166.21166.5	controllerType=0 controllerNumber=1 scan=21166	46.6655
29309:5	1	S.MP[+15.995]LPPHPGHPGYINFSYEVLTPLKWYQSMIRHPYP.S		P[+16]	836.419	5	4178.07	4179.08	-1	-1.3	17	Non	164.47	149.01	3.89	3.04	1509	>sp|P02817|AMELX_BOVIN Amelogenin, X isoform OS=Bos taurus OX=9913 GN=AMELX PE=1 SV=2	1	hf1_10472_ebo_36_1_261219.ScanId;v=1;d1=22199.22199.5	controllerType=0 controllerNumber=1 scan=22199	48.5352
45321:6	1	S.MP[+15.995]LPPHPGHPGYINFSYEVLTPLKWYQSMIRHPYP.S		P[+16]	697.188	6	4178.09	4179.08	-1	3.9	17	Non	170.03	170.03	4	4.51	1509	>sp|P02817|AMELX_BOVIN Amelogenin, X isoform OS=Bos taurus OX=9913 GN=AMELX PE=1 SV=2	1	hf1_10472_ebo_36_1_261219.ScanId;v=1;d1=33712.33712.6	controllerType=0 controllerNumber=1 scan=33712	73.6025
31520:6	1	S.MP[+15.995]LPPHPGHPGYINFSYEVLTPLKWYQSMIRHPYP.S		P[+16]	697.183	6	4178.06	4179.08	-1	-3.4	17	Non	178.47	159.42	1.88	2.89	1509	>sp|P02817|AMELX_BOVIN Amelogenin, X isoform OS=Bos taurus OX=9913 GN=AMELX PE=1 SV=2	1	hf1_10472_ebo_36_1_261219.ScanId;v=1;d1=23623.23623.6	controllerType=0 controllerNumber=1 scan=23623	51.0957
26477:6	1	S.M[+15.995]PLPPHPGHPGYINFSYEVLTPLKWYQSMIRHPYP.S		M[+16]	697.188	6	4178.09	4179.08	-1	3.9	17	Non	181.88	172.39	22.72	4.51	1509	>sp|P02817|AMELX_BOVIN Amelogenin, X isoform OS=Bos taurus OX=9913 GN=AMELX PE=1 SV=2	1	hf1_10472_ebo_36_1_261219.ScanId;v=1;d1=20401.20401.6	controllerType=0 controllerNumber=1 scan=20401	45.2999
28687:5	1	S.MP[+15.995]LPPHPGHPGYINFSYEVLTPLKWYQSMIRHPYP.S		P[+16]	836.421	5	4178.07	4179.08	-1	0	17	Non	192.16	192.16	3.39	4.48	1509	>sp|P02817|AMELX_BOVIN Amelogenin, X isoform OS=Bos taurus OX=9913 GN=AMELX PE=1 SV=2	1	hf1_10472_ebo_36_1_261219.ScanId;v=1;d1=21814.21814.5	controllerType=0 controllerNumber=1 scan=21814	47.8376
28281:5	1	S.M[+15.995]PLPPHPGHPGYINFSYEVLTPLKWYQSMIRHPYP.S		M[+16]	836.419	5	4178.06	4179.08	-1	-2.2	17	Non	194.62	160.73	54.85	4.08	1509	>sp|P02817|AMELX_BOVIN Amelogenin, X isoform OS=Bos taurus OX=9913 GN=AMELX PE=1 SV=2	1	hf1_10472_ebo_36_1_261219.ScanId;v=1;d1=21552.21552.5	controllerType=0 controllerNumber=1 scan=21552	47.371
29652:5	1	S.MPLPPHPGHPGYINFSYEVLTPLKW[+15.995]YQSMIRHPYP.S		W[+16]	836.616	5	4179.05	4179.08	0	-6.8	17	Non	204.35	204.35	0	3.5	1509	>sp|P02817|AMELX_BOVIN Amelogenin, X isoform OS=Bos taurus OX=9913 GN=AMELX PE=1 SV=2	1	hf1_10472_ebo_36_1_261219.ScanId;v=1;d1=22408.22408.5	controllerType=0 controllerNumber=1 scan=22408	48.9085
31213:6	1	S.MP[+15.995]LPPHPGHPGYINFSYEVLTPLKWYQSMIRHPYP.S		P[+16]	697.184	6	4178.07	4179.08	-1	-1.8	17	Non	236.79	236.79	4	4.28	1509	>sp|P02817|AMELX_BOVIN Amelogenin, X isoform OS=Bos taurus OX=9913 GN=AMELX PE=1 SV=2	1	hf1_10472_ebo_36_1_261219.ScanId;v=1;d1=23426.23426.6	controllerType=0 controllerNumber=1 scan=23426	50.7423
28992:5	1	S.M[+15.995]PLPPHPGHPGYINFSYEVLTPLKWYQSMIRHPYP.S		M[+16]	836.42	5	4178.07	4179.08	-1	-0.6	17	Non	264.01	234.18	23.22	5.6	1509	>sp|P02817|AMELX_BOVIN Amelogenin, X isoform OS=Bos taurus OX=9913 GN=AMELX PE=1 SV=2	1	hf1_10472_ebo_36_1_261219.ScanId;v=1;d1=22004.22004.5	controllerType=0 controllerNumber=1 scan=22004	48.1828
27228:6	1	S.MP[+15.995]LPPHPGHPGYINFSYEVLTPLKWYQSMIRHPYP.S		P[+16]	697.186	6	4178.08	4179.08	-1	1.2	17	Non	265.53	216.98	5.8	5.42	1509	>sp|P02817|AMELX_BOVIN Amelogenin, X isoform OS=Bos taurus OX=9913 GN=AMELX PE=1 SV=2	1	hf1_10472_ebo_36_1_261219.ScanId;v=1;d1=20887.20887.6	controllerType=0 controllerNumber=1 scan=20887	46.1587
27963:5	1	S.M[+15.995]PLPPHPGHPGYINFSYEVLTPLKWYQSMIRHPYP.S		M[+16]	836.422	5	4178.08	4179.08	-1	1.3	17	Non	290.94	256.04	9.52	6.24	1509	>sp|P02817|AMELX_BOVIN Amelogenin, X isoform OS=Bos taurus OX=9913 GN=AMELX PE=1 SV=2	1	hf1_10472_ebo_36_1_261219.ScanId;v=1;d1=21355.21355.5	controllerType=0 controllerNumber=1 scan=21355	47.0118
31278:5	1	S.M[+15.995]PLPPHPGHPGYINFSYEVLTPLKWYQSMIRHPYP.S		M[+16]	836.42	5	4178.07	4179.08	-1	-0.5	17	Non	322.65	294.44	23.17	6.26	1509	>sp|P02817|AMELX_BOVIN Amelogenin, X isoform OS=Bos taurus OX=9913 GN=AMELX PE=1 SV=2	1	hf1_10472_ebo_36_1_261219.ScanId;v=1;d1=23469.23469.5	controllerType=0 controllerNumber=1 scan=23469	50.8184
30989:5	1	S.MPLPPHPGHPGYINFSYEVLTPLKWY[+15.995]QSMIRHPYP.S		Y[+16]	836.622	5	4179.08	4179.08	0	0.9	17	Non	419.31	419.31	0	7.07	1509	>sp|P02817|AMELX_BOVIN Amelogenin, X isoform OS=Bos taurus OX=9913 GN=AMELX PE=1 SV=2	1	hf1_10472_ebo_36_1_261219.ScanId;v=1;d1=23275.23275.5	controllerType=0 controllerNumber=1 scan=23275	50.4693
31080:4	1	S.M[+15.995]PLPPHPGHPGYINFSYEVLTPLKWYQSMIRHPYP.S		M[+16]	1045.28	4	4178.08	4179.08	-1	1.3	17	Non	433.57	305.93	13.82	5.48	1509	>sp|P02817|AMELX_BOVIN Amelogenin, X isoform OS=Bos taurus OX=9913 GN=AMELX PE=1 SV=2	1	hf1_10472_ebo_36_1_261219.ScanId;v=1;d1=23331.23331.4	controllerType=0 controllerNumber=1 scan=23331	50.571
30929:6	1	S.MPLPPHPGHPGYINFSYEVLTPLKWY[+15.995]QSMIRHPYP.S		Y[+16]	697.354	6	4179.09	4179.08	0	2.5	17	Non	485.24	485.24	0	7.1	1509	>sp|P02817|AMELX_BOVIN Amelogenin, X isoform OS=Bos taurus OX=9913 GN=AMELX PE=1 SV=2	1	hf1_10472_ebo_36_1_261219.ScanId;v=1;d1=23235.23235.6	controllerType=0 controllerNumber=1 scan=23235	50.3974
29754:6	1	S.MPLPPHPGHPGYINFSYEVLTPLKWYQSM[+15.995]IRHPYP.S		M[+16]	697.356	6	4179.1	4179.08	0	6	17	Non	516.97	483.75	8.56	7.71	1509	>sp|P02817|AMELX_BOVIN Amelogenin, X isoform OS=Bos taurus OX=9913 GN=AMELX PE=1 SV=2	1	hf1_10472_ebo_36_1_261219.ScanId;v=1;d1=22473.22473.6	controllerType=0 controllerNumber=1 scan=22473	49.024
27064:5	1	S.M[+15.995]PLPPHPGHPGYINFSYEVLTPLKWYQSMIRHPY[+15.995]P.S		M[+16], Y[+16]	839.618	5	4194.06	4195.07	-1	-2.1	17	Non	2.42	2.42	0	0.91	1509	>sp|P02817|AMELX_BOVIN Amelogenin, X isoform OS=Bos taurus OX=9913 GN=AMELX PE=1 SV=2	1	hf1_10472_ebo_36_1_261219.ScanId;v=1;d1=20782.20782.5	controllerType=0 controllerNumber=1 scan=20782	45.9702
28581:6	1	S.MP[+15.995]LPPHPGHPGYINFSYEVLTPLKWYQSMIRHPY[+15.995]P.S		P[+16], Y[+16]	700.016	6	4195.06	4195.07	0	-3.4	17	Non	12.45	12.45	0	1.22	1509	>sp|P02817|AMELX_BOVIN Amelogenin, X isoform OS=Bos taurus OX=9913 GN=AMELX PE=1 SV=2	1	hf1_10472_ebo_36_1_261219.ScanId;v=1;d1=21743.21743.6	controllerType=0 controllerNumber=1 scan=21743	47.7075
35570:4	1	S.M[+15.995]PLPPHPGHPGYINFS[+79.966]YEVLTPLKWYQSMIRHPYP.S		M[+16], S[+80]	1065.51	4	4259.02	4259.04	0	-5.9	17	Non	119.01	119.01	6.44	0.92	1509	>sp|P02817|AMELX_BOVIN Amelogenin, X isoform OS=Bos taurus OX=9913 GN=AMELX PE=1 SV=2	1	hf1_10472_ebo_36_1_261219.ScanId;v=1;d1=26242.26242.4	controllerType=0 controllerNumber=1 scan=26242	55.9086
31151:6	1	S.M[+15.995]PLPPHPGHPGYINFSYEVLTP[+31.990]LKWYQSMIRHPYP.S		M[+16], P[+32]	702.849	6	4212.06	4211.07	1	-2.6	17	Non	126.73	126.73	2.75	2.39	1509	>sp|P02817|AMELX_BOVIN Amelogenin, X isoform OS=Bos taurus OX=9913 GN=AMELX PE=1 SV=2	1	hf1_10472_ebo_36_1_261219.ScanId;v=1;d1=23378.23378.6	controllerType=0 controllerNumber=1 scan=23378	50.6527
38492:5	1	S.MPLPPHPGHPGYINFS[+79.966]YEVLTPLKWYQ[+0.984]SMIRHPYP.S		Q[+1], S[+80]	849.412	5	4243.03	4244.03	-1	0.8	17	Non	147.09	147.09	2.46	3.51	1509	>sp|P02817|AMELX_BOVIN Amelogenin, X isoform OS=Bos taurus OX=9913 GN=AMELX PE=1 SV=2	1	hf1_10472_ebo_36_1_261219.ScanId;v=1;d1=28071.28071.6	controllerType=0 controllerNumber=1 scan=28071	59.1965
30231:5	1	S.MP[+15.995]LPPHPGHPGYINFSYEVLTP[+31.990]LKWYQSMIRHPYP.S		P[+16][+32]	843.018	5	4211.06	4211.07	0	-1.7	17	Non	150.78	150.78	4	2.3	1509	>sp|P02817|AMELX_BOVIN Amelogenin, X isoform OS=Bos taurus OX=9913 GN=AMELX PE=1 SV=2	1	hf1_10472_ebo_36_1_261219.ScanId;v=1;d1=22780.22780.5	controllerType=0 controllerNumber=1 scan=22780	49.5786
31862:6	1	S.MP[+15.995]LPPHPGHPGYINFSYEVLTP[+15.995]LKWYQSMIRHPYP.S		P[+16]*2	700.181	6	4196.05	4195.07	1	-6.2	17	Non	153.88	153.88	4	2.32	1509	>sp|P02817|AMELX_BOVIN Amelogenin, X isoform OS=Bos taurus OX=9913 GN=AMELX PE=1 SV=2	1	hf1_10472_ebo_36_1_261219.ScanId;v=1;d1=23852.23852.6	controllerType=0 controllerNumber=1 scan=23852	51.5151
29584:6	1	S.M[+15.995]PLPPHPGHPGYINFSYEVLTP[+31.990]LKWYQSMIRHPYP.S		M[+16], P[+32]	702.684	6	4211.07	4211.07	0	0.5	17	Non	171.23	171.23	10.19	3.92	1509	>sp|P02817|AMELX_BOVIN Amelogenin, X isoform OS=Bos taurus OX=9913 GN=AMELX PE=1 SV=2	1	hf1_10472_ebo_36_1_261219.ScanId;v=1;d1=22367.22367.6	controllerType=0 controllerNumber=1 scan=22367	48.835
28635:5	1	S.MP[+15.995]LPPHPGHPGYINFSYEVLTPLKW[+15.995]YQSMIRHPYP.S		P[+16], W[+16]	839.621	5	4194.07	4195.07	-1	1.5	17	Non	180.66	180.66	0	4.54	1509	>sp|P02817|AMELX_BOVIN Amelogenin, X isoform OS=Bos taurus OX=9913 GN=AMELX PE=1 SV=2	1	hf1_10472_ebo_36_1_261219.ScanId;v=1;d1=21779.21779.5	controllerType=0 controllerNumber=1 scan=21779	47.7705
32116:6	1	S.MP[+15.995]LPPHPGHPGYINFSYEVLTPLKWYQSMIRH[+15.995]PYP.S		H[+16], P[+16]	700.184	6	4196.07	4195.07	1	-2	17	Non	187.81	187.81	0.78	3.48	1509	>sp|P02817|AMELX_BOVIN Amelogenin, X isoform OS=Bos taurus OX=9913 GN=AMELX PE=1 SV=2	1	hf1_10472_ebo_36_1_261219.ScanId;v=1;d1=24009.24009.6	controllerType=0 controllerNumber=1 scan=24009	51.8014
32626:5	1	S.MPLPPHPGHPGYINFSYEVLTPLKWYQSM[+15.995]IR[+0.984]HPYP.S		M[+16], R[+1]	836.617	5	4179.06	4180.06	-1	0.1	17	Non	192.91	192.91	6.04	4.48	1509	>sp|P02817|AMELX_BOVIN Amelogenin, X isoform OS=Bos taurus OX=9913 GN=AMELX PE=1 SV=2	1	hf1_10472_ebo_36_1_261219.ScanId;v=1;d1=24342.24342.4	controllerType=0 controllerNumber=1 scan=24342	52.4164
29936:6	1	S.M[+15.995]PLPPHPGHPGYINFSYEVLTP[+31.990]LKWYQSMIRHPYP.S		M[+16], P[+32]	702.685	6	4211.07	4211.07	0	1	17	Non	207.2	207.2	8.48	3.97	1509	>sp|P02817|AMELX_BOVIN Amelogenin, X isoform OS=Bos taurus OX=9913 GN=AMELX PE=1 SV=2	1	hf1_10472_ebo_36_1_261219.ScanId;v=1;d1=22589.22589.6	controllerType=0 controllerNumber=1 scan=22589	49.2307
34663:6	1	S.MP[+15.995]LPPHPGHPGYINFS[+79.966]YEVLTPLKWYQSMIRHPYP.S		P[+16], S[+80]	710.517	6	4258.06	4259.04	-1	5.4	17	Non	207.36	207.36	5.8	5.08	1509	>sp|P02817|AMELX_BOVIN Amelogenin, X isoform OS=Bos taurus OX=9913 GN=AMELX PE=1 SV=2	1	hf1_10472_ebo_36_1_261219.ScanId;v=1;d1=25664.25664.6	controllerType=0 controllerNumber=1 scan=25664	54.8552
27687:5	1	S.M[+15.995]PLPPHPGHPGYINFSYEVLTPLK[+15.995]WYQSMIRHPYP.S		K[+16], M[+16]	839.625	5	4194.09	4195.07	-1	5.9	17	Non	208.67	208.67	0	5.32	1509	>sp|P02817|AMELX_BOVIN Amelogenin, X isoform OS=Bos taurus OX=9913 GN=AMELX PE=1 SV=2	1	hf1_10472_ebo_36_1_261219.ScanId;v=1;d1=21183.21183.5	controllerType=0 controllerNumber=1 scan=21183	46.697
31028:6	1	S.MPLPPHPGHPGYINFS[+79.966]YEVLTPLKWY[+15.995]QSMIRHPYP.S		S[+80], Y[+16]	710.684	6	4259.07	4259.04	0	6.1	17	Non	221.51	221.51	0	4.7	1509	>sp|P02817|AMELX_BOVIN Amelogenin, X isoform OS=Bos taurus OX=9913 GN=AMELX PE=1 SV=2	1	hf1_10472_ebo_36_1_261219.ScanId;v=1;d1=23300.23300.6	controllerType=0 controllerNumber=1 scan=23300	50.5156
30035:4	1	S.M[+15.995]PLPPHPGHPGYINFSYEVLTPLKWYQSM[+15.995]IRHPYP.S		M[+16]*2	1049.78	4	4196.08	4195.07	1	1.9	17	Non	237.31	237.31	0	3.12	1509	>sp|P02817|AMELX_BOVIN Amelogenin, X isoform OS=Bos taurus OX=9913 GN=AMELX PE=1 SV=2	1	hf1_10472_ebo_36_1_261219.ScanId;v=1;d1=22654.22654.5	controllerType=0 controllerNumber=1 scan=22654	49.3459
30021:4	1	S.M[+15.995]PLPPHPGHPGYINFSYEVLTPLKWYQSM[+15.995]IRHPYP.S		M[+16]*2	1049.77	4	4196.06	4195.07	1	-3.4	17	Non	240.47	240.47	0	4.4	1509	>sp|P02817|AMELX_BOVIN Amelogenin, X isoform OS=Bos taurus OX=9913 GN=AMELX PE=1 SV=2	1	hf1_10472_ebo_36_1_261219.ScanId;v=1;d1=22645.22645.2	controllerType=0 controllerNumber=1 scan=22645	49.3294
37247:5	1	S.MPLPPHPGHPGYINFS[+79.966]YEVLTPLKWYQ[+0.984]SMIRHPYP.S		Q[+1], S[+80]	849.619	5	4244.06	4244.03	0	7.5	17	Non	262.9	262.9	11.35	6.19	1509	>sp|P02817|AMELX_BOVIN Amelogenin, X isoform OS=Bos taurus OX=9913 GN=AMELX PE=1 SV=2	1	hf1_10472_ebo_36_1_261219.ScanId;v=1;d1=27285.27285.6	controllerType=0 controllerNumber=1 scan=27285	57.7833
32517:4	1	S.M[+15.995]PLPPHPGHPGYIN[+0.984]FSYEVLTPLKWYQSMIRHPYP.S		M[+16], N[+1]	1045.77	4	4180.07	4180.06	0	3	17	Non	270.13	270.13	1.1	4.61	1509	>sp|P02817|AMELX_BOVIN Amelogenin, X isoform OS=Bos taurus OX=9913 GN=AMELX PE=1 SV=2	1	hf1_10472_ebo_36_1_261219.ScanId;v=1;d1=24270.24270.4	controllerType=0 controllerNumber=1 scan=24270	52.2817
31400:6	1	S.M[+15.995]PLPPHPGHPGYINFSYEVLTPLKWYQSM[+15.995]IRHPYP.S		M[+16]*2	700.017	6	4195.06	4195.07	0	-1.7	17	Non	279.55	279.55	0	5.23	1509	>sp|P02817|AMELX_BOVIN Amelogenin, X isoform OS=Bos taurus OX=9913 GN=AMELX PE=1 SV=2	1	hf1_10472_ebo_36_1_261219.ScanId;v=1;d1=23543.23543.6	controllerType=0 controllerNumber=1 scan=23543	50.9498
29624:5	1	S.MPLPPHPGHPGYINFS[+79.966]YEVLTPLKW[+31.990]YQSMIRHPYP.S		S[+80], W[+32]	855.818	5	4275.06	4275.04	0	5.5	17	Non	284.64	284.64	0	6.44	1509	>sp|P02817|AMELX_BOVIN Amelogenin, X isoform OS=Bos taurus OX=9913 GN=AMELX PE=1 SV=2	1	hf1_10472_ebo_36_1_261219.ScanId;v=1;d1=22392.22392.5	controllerType=0 controllerNumber=1 scan=22392	48.8815
28503:6	1	S.MP[+15.995]LPPHPGHPGYINFSYEVLTPLKWYQSM[+15.995]IRHPYP.S		M[+16], P[+16]	699.851	6	4194.07	4195.07	-1	0.8	17	Non	285.51	285.51	1.8	6.07	1509	>sp|P02817|AMELX_BOVIN Amelogenin, X isoform OS=Bos taurus OX=9913 GN=AMELX PE=1 SV=2	1	hf1_10472_ebo_36_1_261219.ScanId;v=1;d1=21694.21694.6	controllerType=0 controllerNumber=1 scan=21694	47.6222
27884:6	1	S.M[+15.995]PLPPHPGHPGYINFSYEVLTPLKW[+31.990]YQSMIRHPYP.S		M[+16], W[+32]	702.686	6	4211.08	4211.07	0	2.4	17	Non	290.64	290.64	0.38	5.68	1509	>sp|P02817|AMELX_BOVIN Amelogenin, X isoform OS=Bos taurus OX=9913 GN=AMELX PE=1 SV=2	1	hf1_10472_ebo_36_1_261219.ScanId;v=1;d1=21306.21306.6	controllerType=0 controllerNumber=1 scan=21306	46.9204
32493:5	1	S.MP[+15.995]LPPHPGHPGYIN[+0.984]FSYEVLTPLKWYQSMIRHPYP.S		N[+1], P[+16]	836.617	5	4179.06	4180.06	-1	0.1	17	Non	294.88	294.88	13.5	6.03	1509	>sp|P02817|AMELX_BOVIN Amelogenin, X isoform OS=Bos taurus OX=9913 GN=AMELX PE=1 SV=2	1	hf1_10472_ebo_36_1_261219.ScanId;v=1;d1=24256.24256.5	controllerType=0 controllerNumber=1 scan=24256	52.2577
45325:6	1	S.MP[+15.995]LPPHPGHPGYINFSYEVLTP[+15.995]LKWYQSMIRHPYP.S		P[+16]*2	700.022	6	4195.1	4195.07	0	5.7	17	Non	305.9	305.9	4	6.43	1509	>sp|P02817|AMELX_BOVIN Amelogenin, X isoform OS=Bos taurus OX=9913 GN=AMELX PE=1 SV=2	1	hf1_10472_ebo_36_1_261219.ScanId;v=1;d1=33714.33714.6	controllerType=0 controllerNumber=1 scan=33714	73.6055
30732:6	1	S.MP[+15.995]LPPHPGHPGYINFSYEVLTPLKWYQSM[+15.995]IRHPYP.S		M[+16], P[+16]	700.017	6	4195.06	4195.07	0	-1.7	17	Non	307.88	307.88	7.14	5.63	1509	>sp|P02817|AMELX_BOVIN Amelogenin, X isoform OS=Bos taurus OX=9913 GN=AMELX PE=1 SV=2	1	hf1_10472_ebo_36_1_261219.ScanId;v=1;d1=23105.23105.6	controllerType=0 controllerNumber=1 scan=23105	50.1606
28363:6	1	S.M[+15.995]PLPPHPGHPGYINFSYEVLTP[+31.990]LKWYQSMIRHPYP.S		M[+16], P[+32]	702.683	6	4211.06	4211.07	0	-1.6	17	Non	309.18	309.18	7.12	5.63	1509	>sp|P02817|AMELX_BOVIN Amelogenin, X isoform OS=Bos taurus OX=9913 GN=AMELX PE=1 SV=2	1	hf1_10472_ebo_36_1_261219.ScanId;v=1;d1=21602.21602.6	controllerType=0 controllerNumber=1 scan=21602	47.4576
28194:6	1	S.MP[+15.995]LPPHPGHPGYINFSYEVLTPLKWY[+15.995]QSMIRHPYP.S		P[+16], Y[+16]	699.85	6	4194.06	4195.07	-1	-1.4	17	Non	317.53	317.53	5.8	6.01	1509	>sp|P02817|AMELX_BOVIN Amelogenin, X isoform OS=Bos taurus OX=9913 GN=AMELX PE=1 SV=2	1	hf1_10472_ebo_36_1_261219.ScanId;v=1;d1=21497.21497.6	controllerType=0 controllerNumber=1 scan=21497	47.2735
27547:6	1	S.MP[+15.995]LPPHPGHPGYINFSYEVLTPLKW[+31.990]YQSMIRHPYP.S		P[+16], W[+32]	702.688	6	4211.09	4211.07	0	5.3	17	Non	333.15	333.15	0.51	6.64	1509	>sp|P02817|AMELX_BOVIN Amelogenin, X isoform OS=Bos taurus OX=9913 GN=AMELX PE=1 SV=2	1	hf1_10472_ebo_36_1_261219.ScanId;v=1;d1=21092.21092.6	controllerType=0 controllerNumber=1 scan=21092	46.527
28422:5	1	S.MP[+15.995]LPPHPGHPGYINFSYEVLTPLKWYQSM[+15.995]IRHPYP.S		M[+16], P[+16]	839.821	5	4195.07	4195.07	0	0.5	17	Non	341.28	341.28	7.73	6.15	1509	>sp|P02817|AMELX_BOVIN Amelogenin, X isoform OS=Bos taurus OX=9913 GN=AMELX PE=1 SV=2	1	hf1_10472_ebo_36_1_261219.ScanId;v=1;d1=21643.21643.3	controllerType=0 controllerNumber=1 scan=21643	47.531
29704:4	1	S.M[+15.995]PLPPHPGHPGYINFSYEVLTPLKWYQSM[+15.995]IRHPYP.S		M[+16]*2	1049.78	4	4196.12	4195.07	1	9.6	17	Non	347.74	223.66	0	4.93	1509	>sp|P02817|AMELX_BOVIN Amelogenin, X isoform OS=Bos taurus OX=9913 GN=AMELX PE=1 SV=2	1	hf1_10472_ebo_36_1_261219.ScanId;v=1;d1=22444.22444.4	controllerType=0 controllerNumber=1 scan=22444	48.9716
28000:5	1	S.M[+15.995]PLPPHPGHPGYINFSYEVLTPLK[+15.995]WYQSMIRHPYP.S		K[+16], M[+16]	839.625	5	4194.09	4195.07	-1	6	17	Non	348.76	348.76	0	7.21	1509	>sp|P02817|AMELX_BOVIN Amelogenin, X isoform OS=Bos taurus OX=9913 GN=AMELX PE=1 SV=2	1	hf1_10472_ebo_36_1_261219.ScanId;v=1;d1=21379.21379.5	controllerType=0 controllerNumber=1 scan=21379	47.057
32713:6	1	S.MPLPPHPGHPGYINFSYEVLTPLKWYQ[+0.984]SM[+15.995]IRHPYP.S		M[+16], Q[+1]	697.349	6	4179.06	4180.06	-1	-0.5	17	Non	355.95	355.95	36.48	6.17	1509	>sp|P02817|AMELX_BOVIN Amelogenin, X isoform OS=Bos taurus OX=9913 GN=AMELX PE=1 SV=2	1	hf1_10472_ebo_36_1_261219.ScanId;v=1;d1=24399.24399.6	controllerType=0 controllerNumber=1 scan=24399	52.5257
37127:4	1	S.MPLPPHPGHPGYINFS[+79.966]YEVLTPLKWYQ[+0.984]SMIRHPYP.S		Q[+1], S[+80]	1061.77	4	4244.05	4244.03	0	4.9	17	Non	357.42	357.42	39.95	5.92	1509	>sp|P02817|AMELX_BOVIN Amelogenin, X isoform OS=Bos taurus OX=9913 GN=AMELX PE=1 SV=2	1	hf1_10472_ebo_36_1_261219.ScanId;v=1;d1=27211.27211.4	controllerType=0 controllerNumber=1 scan=27211	57.651
29498:6	1	S.MP[+15.995]LPPHPGHPGYINFSYEVLTPLKWYQSM[+15.995]IRHPYP.S		M[+16], P[+16]	699.851	6	4194.07	4195.07	-1	1	17	Non	370.94	370.94	1.8	7.2	1509	>sp|P02817|AMELX_BOVIN Amelogenin, X isoform OS=Bos taurus OX=9913 GN=AMELX PE=1 SV=2	1	hf1_10472_ebo_36_1_261219.ScanId;v=1;d1=22314.22314.6	controllerType=0 controllerNumber=1 scan=22314	48.7436
34303:6	1	S.MP[+15.995]LPPHPGHPGYINFSYEVLTPLKWYQSMIR[+0.984]HPYP.S		P[+16], R[+1]	697.52	6	4180.09	4180.06	0	6.1	17	Non	388.48	388.48	4	8.13	1509	>sp|P02817|AMELX_BOVIN Amelogenin, X isoform OS=Bos taurus OX=9913 GN=AMELX PE=1 SV=2	1	hf1_10472_ebo_36_1_261219.ScanId;v=1;d1=25438.25438.6	controllerType=0 controllerNumber=1 scan=25438	54.4462
45302:5	1	S.MPLPPHPGHPGYINFS[+79.966]YEVLTPLKW[+15.995]YQSMIRHPYP.S		S[+80], W[+16]	852.823	5	4260.08	4259.04	1	8.9	17	Non	405.25	405.25	0	7.02	1509	>sp|P02817|AMELX_BOVIN Amelogenin, X isoform OS=Bos taurus OX=9913 GN=AMELX PE=1 SV=2	1	hf1_10472_ebo_36_1_261219.ScanId;v=1;d1=33699.33699.5	controllerType=0 controllerNumber=1 scan=33699	73.5755
28319:5	1	S.MP[+15.995]LPPHPGHPGYINFSYEVLTPLKWYQSM[+15.995]IRHPYP.S		M[+16], P[+16]	839.621	5	4194.07	4195.07	-1	1.2	17	Non	409.91	409.91	0	7.4	1509	>sp|P02817|AMELX_BOVIN Amelogenin, X isoform OS=Bos taurus OX=9913 GN=AMELX PE=1 SV=2	1	hf1_10472_ebo_36_1_261219.ScanId;v=1;d1=21576.21576.5	controllerType=0 controllerNumber=1 scan=21576	47.4128
30419:6	1	S.MP[+15.995]LPPHPGHPGYINFSYEVLTPLKWY[+15.995]QSMIRHPYP.S		P[+16], Y[+16]	700.018	6	4195.07	4195.07	0	0.1	17	Non	457.23	457.23	4	6.79	1509	>sp|P02817|AMELX_BOVIN Amelogenin, X isoform OS=Bos taurus OX=9913 GN=AMELX PE=1 SV=2	1	hf1_10472_ebo_36_1_261219.ScanId;v=1;d1=22905.22905.6	controllerType=0 controllerNumber=1 scan=22905	49.8041
27881:6	1	S.M[+15.995]PLPPHPGHPGYINFSYEVLTPLKW[+15.995]YQSMIRHPYP.S		M[+16], W[+16]	700.022	6	4195.1	4195.07	0	5.5	17	Non	471.98	471.98	0.59	7.67	1509	>sp|P02817|AMELX_BOVIN Amelogenin, X isoform OS=Bos taurus OX=9913 GN=AMELX PE=1 SV=2	1	hf1_10472_ebo_36_1_261219.ScanId;v=1;d1=21304.21304.6	controllerType=0 controllerNumber=1 scan=21304	46.9174
31015:6	1	S.MP[+15.995]LPPHPGHPGYINFSYEVLTP[+15.995]LKWYQSMIRHPYP.S		P[+16]*2	700.016	6	4195.06	4195.07	0	-2.5	17	Non	475.19	475.19	0.58	6.39	1509	>sp|P02817|AMELX_BOVIN Amelogenin, X isoform OS=Bos taurus OX=9913 GN=AMELX PE=1 SV=2	1	hf1_10472_ebo_36_1_261219.ScanId;v=1;d1=23292.23292.6	controllerType=0 controllerNumber=1 scan=23292	50.5007
29825:6	1	S.M[+15.995]PLPPHPGHPGYINFSYEVLTPLKW[+15.995]YQSMIRHPYP.S		M[+16], W[+16]	700.018	6	4195.07	4195.07	0	-0.7	17	Non	484.05	484.05	0.46	6.91	1509	>sp|P02817|AMELX_BOVIN Amelogenin, X isoform OS=Bos taurus OX=9913 GN=AMELX PE=1 SV=2	1	hf1_10472_ebo_36_1_261219.ScanId;v=1;d1=22517.22517.6	controllerType=0 controllerNumber=1 scan=22517	49.1019
30350:5	1	S.M[+15.995]PLPPHPGHPGYINFSYEVLTPLKWY[+15.995]QSMIRHPYP.S		M[+16], Y[+16]	839.823	5	4195.08	4195.07	0	2.8	17	Non	493.21	493.21	0	7.35	1509	>sp|P02817|AMELX_BOVIN Amelogenin, X isoform OS=Bos taurus OX=9913 GN=AMELX PE=1 SV=2	1	hf1_10472_ebo_36_1_261219.ScanId;v=1;d1=22861.22861.5	controllerType=0 controllerNumber=1 scan=22861	49.7266
31319:6	1	S.MPLPPHPGHPGYINFS[+79.966]YEVLTPLKWYQSM[+15.995]IRHPYP.S		M[+16], S[+80]	710.683	6	4259.06	4259.04	0	4.8	17	Non	497.32	497.32	3.5	7.71	1509	>sp|P02817|AMELX_BOVIN Amelogenin, X isoform OS=Bos taurus OX=9913 GN=AMELX PE=1 SV=2	1	hf1_10472_ebo_36_1_261219.ScanId;v=1;d1=23492.23492.6	controllerType=0 controllerNumber=1 scan=23492	50.8587
28875:6	1	S.M[+15.995]PLPPHPGHPGYINFSYEVLTPLKWYQSM[+15.995]IRHPYP.S		M[+16]*2	700.021	6	4195.09	4195.07	0	3.6	17	Non	499.46	499.46	0	7.68	1509	>sp|P02817|AMELX_BOVIN Amelogenin, X isoform OS=Bos taurus OX=9913 GN=AMELX PE=1 SV=2	1	hf1_10472_ebo_36_1_261219.ScanId;v=1;d1=21930.21930.6	controllerType=0 controllerNumber=1 scan=21930	48.048
31751:5	1	S.MPLPPHPGHPGYINFS[+79.966]YEVLTPLKWY[+15.995]QSMIRHPYP.S		S[+80], Y[+16]	852.616	5	4259.05	4259.04	0	1.6	17	Non	521.42	521.42	4	7.35	1509	>sp|P02817|AMELX_BOVIN Amelogenin, X isoform OS=Bos taurus OX=9913 GN=AMELX PE=1 SV=2	1	hf1_10472_ebo_36_1_261219.ScanId;v=1;d1=23779.23779.5	controllerType=0 controllerNumber=1 scan=23779	51.3826
29651:5	1	S.M[+15.995]PLPPHPGHPGYINFSYEVLTPLKWY[+15.995]QSMIRHPYP.S		M[+16], Y[+16]	839.62	5	4194.07	4195.07	-1	0.9	17	Non	531.9	531.9	0	7.65	1509	>sp|P02817|AMELX_BOVIN Amelogenin, X isoform OS=Bos taurus OX=9913 GN=AMELX PE=1 SV=2	1	hf1_10472_ebo_36_1_261219.ScanId;v=1;d1=22407.22407.5	controllerType=0 controllerNumber=1 scan=22407	48.907
30131:6	1	S.MP[+15.995]LPPHPGHPGYINFSYEVLTPLKWY[+15.995]QSMIRHPYP.S		P[+16], Y[+16]	700.185	6	4196.07	4195.07	1	-0.3	17	Non	638.24	638.24	4	9.34	1509	>sp|P02817|AMELX_BOVIN Amelogenin, X isoform OS=Bos taurus OX=9913 GN=AMELX PE=1 SV=2	1	hf1_10472_ebo_36_1_261219.ScanId;v=1;d1=22715.22715.6	controllerType=0 controllerNumber=1 scan=22715	49.4579
29249:5	1	S.MP[+15.995]LPPHPGHPGYINFSYEVLTPLKWYQSM[+15.995]IRHPYP.S		M[+16], P[+16]	839.824	5	4195.09	4195.07	0	4.7	17	Non	648.46	648.46	4	10.37	1509	>sp|P02817|AMELX_BOVIN Amelogenin, X isoform OS=Bos taurus OX=9913 GN=AMELX PE=1 SV=2	1	hf1_10472_ebo_36_1_261219.ScanId;v=1;d1=22161.22161.5	controllerType=0 controllerNumber=1 scan=22161	48.4664
35806:5	1	S.MP[+15.995]LPPHPGHPGYINFS[+79.966]YEVLTPLKWYQSMIRHPYP.S		P[+16], S[+80]	852.817	5	4260.06	4259.04	1	2	17	Non	672.14	672.14	5.8	10.64	1509	>sp|P02817|AMELX_BOVIN Amelogenin, X isoform OS=Bos taurus OX=9913 GN=AMELX PE=1 SV=2	1	hf1_10472_ebo_36_1_261219.ScanId;v=1;d1=26397.26397.5	controllerType=0 controllerNumber=1 scan=26397	56.192
31043:4	1	S.MPLPPHPGHPGYINFS[+79.966]YEVLTPLKWYQSM[+15.995]IRHPYP.S		M[+16], S[+80]	1065.27	4	4258.06	4259.04	-1	5.5	17	Non	700.44	700.44	69.85	12.07	1509	>sp|P02817|AMELX_BOVIN Amelogenin, X isoform OS=Bos taurus OX=9913 GN=AMELX PE=1 SV=2	1	hf1_10472_ebo_36_1_261219.ScanId;v=1;d1=23310.23310.4	controllerType=0 controllerNumber=1 scan=23310	50.5336
32468:4	1	S.MPLPPHPGHPGYINFS[+79.966]YEVLTPLKWYQSM[+15.995]IRHPYP.S		M[+16], S[+80]	1065.52	4	4259.06	4259.04	0	3.7	17	Non	710.27	710.27	42.93	11.17	1509	>sp|P02817|AMELX_BOVIN Amelogenin, X isoform OS=Bos taurus OX=9913 GN=AMELX PE=1 SV=2	1	hf1_10472_ebo_36_1_261219.ScanId;v=1;d1=24240.24240.4	controllerType=0 controllerNumber=1 scan=24240	52.2278
29175:6	1	S.M[+15.995]PLPPHPGHPGYINFSYEVLTPLKWYQSM[+15.995]IRHPYP.S		M[+16]*2	700.022	6	4195.1	4195.07	0	5.7	17	Non	710.29	710.29	0	12.13	1509	>sp|P02817|AMELX_BOVIN Amelogenin, X isoform OS=Bos taurus OX=9913 GN=AMELX PE=1 SV=2	1	hf1_10472_ebo_36_1_261219.ScanId;v=1;d1=22117.22117.6	controllerType=0 controllerNumber=1 scan=22117	48.3883
31478:5	1	S.MPLPPHPGHPGYINFS[+79.966]YEVLTPLKWYQSM[+15.995]IRHPYP.S		M[+16], S[+80]	852.618	5	4259.06	4259.04	0	4.1	17	Non	713.11	713.11	19.43	11.85	1509	>sp|P02817|AMELX_BOVIN Amelogenin, X isoform OS=Bos taurus OX=9913 GN=AMELX PE=1 SV=2	1	hf1_10472_ebo_36_1_261219.ScanId;v=1;d1=23594.23594.5	controllerType=0 controllerNumber=1 scan=23594	51.0437
31182:5	1	S.MPLPPHPGHPGYINFS[+79.966]YEVLTPLKWYQSM[+15.995]IRHPYP.S		M[+16], S[+80]	852.62	5	4259.07	4259.04	0	6.7	17	Non	759.3	759.3	33.18	13.3	1509	>sp|P02817|AMELX_BOVIN Amelogenin, X isoform OS=Bos taurus OX=9913 GN=AMELX PE=1 SV=2	1	hf1_10472_ebo_36_1_261219.ScanId;v=1;d1=23403.23403.5	controllerType=0 controllerNumber=1 scan=23403	50.7019
32448:5	1	S.MPLPPHPGHPGYINFS[+79.966]YEVLTPLKWYQSM[+15.995]IRHPYP.S		M[+16], S[+80]	852.817	5	4260.05	4259.04	1	1.9	17	Non	780.79	780.79	32.9	12.64	1509	>sp|P02817|AMELX_BOVIN Amelogenin, X isoform OS=Bos taurus OX=9913 GN=AMELX PE=1 SV=2	1	hf1_10472_ebo_36_1_261219.ScanId;v=1;d1=24227.24227.5	controllerType=0 controllerNumber=1 scan=24227	52.2053
30048:5	1	S.M[+15.995]PLPPHPGHPGYINFSYEVLTPLKWY[+15.995]QSMIRHPYP.S		M[+16], Y[+16]	840.022	5	4196.08	4195.07	1	1.4	17	Non	786.36	786.36	10.97	12.64	1509	>sp|P02817|AMELX_BOVIN Amelogenin, X isoform OS=Bos taurus OX=9913 GN=AMELX PE=1 SV=2	1	hf1_10472_ebo_36_1_261219.ScanId;v=1;d1=22664.22664.5	controllerType=0 controllerNumber=1 scan=22664	49.3667
34804:5	1	S.MP[+15.995]LPPHPGHPGYINFS[+79.966]YEVLTPLKWYQSMIRHPYP.S		P[+16], S[+80]	852.621	5	4259.07	4259.04	0	7.1	17	Non	853.76	853.76	4	15.3	1509	>sp|P02817|AMELX_BOVIN Amelogenin, X isoform OS=Bos taurus OX=9913 GN=AMELX PE=1 SV=2	1	hf1_10472_ebo_36_1_261219.ScanId;v=1;d1=25755.25755.5	controllerType=0 controllerNumber=1 scan=25755	55.0251
28943:5	1	S.MP[+15.995]LPPHPGHPGYINFSYEVLTPLKWYQSM[+15.995]IRHPYP.S		M[+16], P[+16]	839.826	5	4195.1	4195.07	0	6.6	17	Non	909.28	909.28	11.27	16.3	1509	>sp|P02817|AMELX_BOVIN Amelogenin, X isoform OS=Bos taurus OX=9913 GN=AMELX PE=1 SV=2	1	hf1_10472_ebo_36_1_261219.ScanId;v=1;d1=21973.21973.5	controllerType=0 controllerNumber=1 scan=21973	48.1244
30147:4	1	S.M[+15.995]PLPPHPGHPGYINFSYEVLTPLKWY[+15.995]QSMIRHPYP.S		M[+16], Y[+16]	1049.77	4	4196.08	4195.07	1	0.1	17	Non	953.05	953.05	1.63	15.89	1509	>sp|P02817|AMELX_BOVIN Amelogenin, X isoform OS=Bos taurus OX=9913 GN=AMELX PE=1 SV=2	1	hf1_10472_ebo_36_1_261219.ScanId;v=1;d1=22727.22727.4	controllerType=0 controllerNumber=1 scan=22727	49.4789
31335:4	1	S.MPLPPHPGHPGYINFS[+79.966]YEVLTPLKWYQSM[+15.995]IRHPYP.S		M[+16], S[+80]	1065.52	4	4259.07	4259.04	0	5.4	17	Non	997.73	997.73	51.65	16.69	1509	>sp|P02817|AMELX_BOVIN Amelogenin, X isoform OS=Bos taurus OX=9913 GN=AMELX PE=1 SV=2	1	hf1_10472_ebo_36_1_261219.ScanId;v=1;d1=23502.23502.4	controllerType=0 controllerNumber=1 scan=23502	50.8767
34785:4	1	S.M[+15.995]PLPPHPGHPGYINFS[+79.966]YEVLTPLKWYQSMIRHPYP.S		M[+16], S[+80]	1065.52	4	4259.08	4259.04	0	7.9	17	Non	1111.63	1111.63	27.58	19.61	1509	>sp|P02817|AMELX_BOVIN Amelogenin, X isoform OS=Bos taurus OX=9913 GN=AMELX PE=1 SV=2	1	hf1_10472_ebo_36_1_261219.ScanId;v=1;d1=25744.25744.4	controllerType=0 controllerNumber=1 scan=25744	55.0055
41702:5	1	S.MP[+15.995]LPPHPGHPGYINFS[+79.966]YEVLTPLKWY[+15.995]QSMIRHPYP.S		P[+16], S[+80], Y[+16]	856.016	5	4276.05	4275.04	1	2.2	17	Non	4.4	4.4	0	2.22	1509	>sp|P02817|AMELX_BOVIN Amelogenin, X isoform OS=Bos taurus OX=9913 GN=AMELX PE=1 SV=2	1	hf1_10472_ebo_36_1_261219.ScanId;v=1;d1=30094.30094.5	controllerType=0 controllerNumber=1 scan=30094	62.8265
40684:5	1	S.MP[+15.995]LPPHPGHPGYINFS[+79.966]YEVLTPLK[+15.995]WYQSMIRHPYP.S		K[+16], P[+16], S[+80]	855.817	5	4275.05	4275.04	0	3.8	17	Non	5.16	5.16	0	2.23	1509	>sp|P02817|AMELX_BOVIN Amelogenin, X isoform OS=Bos taurus OX=9913 GN=AMELX PE=1 SV=2	1	hf1_10472_ebo_36_1_261219.ScanId;v=1;d1=29443.29443.5	controllerType=0 controllerNumber=1 scan=29443	61.6606
40047:5	1	S.M[+15.995]PLPPHPGHPGYINFS[+79.966]YEVLTPLKWYQSM[+15.995]IRHPYP.S		M[+16]*2, S[+80]	856.018	5	4276.06	4275.04	1	4.4	17	Non	21.67	21.67	0	2.3	1509	>sp|P02817|AMELX_BOVIN Amelogenin, X isoform OS=Bos taurus OX=9913 GN=AMELX PE=1 SV=2	1	hf1_10472_ebo_36_1_261219.ScanId;v=1;d1=29051.29051.5	controllerType=0 controllerNumber=1 scan=29051	60.9578
30640:6	1	S.MP[+15.995]LPPHPGHPGYINFS[+79.966]YEVLTPLKWYQSM[+31.990]IRHPYP.S		M[+32], P[+16], S[+80]	716.014	6	4291.05	4291.03	0	3.7	17	Non	25.32	25.32	4	2.22	1509	>sp|P02817|AMELX_BOVIN Amelogenin, X isoform OS=Bos taurus OX=9913 GN=AMELX PE=1 SV=2	1	hf1_10472_ebo_36_1_261219.ScanId;v=1;d1=23044.23044.6	controllerType=0 controllerNumber=1 scan=23044	50.0482
39274:5	1	S.MP[+15.995]LPPHPGHPGYINFS[+79.966]YEVLTP[+15.995]LKWYQSMIRHPYP.S		P[+16]*2, S[+80]	856.019	5	4276.06	4275.04	1	5.3	17	Non	27.44	27.44	0	2.3	1509	>sp|P02817|AMELX_BOVIN Amelogenin, X isoform OS=Bos taurus OX=9913 GN=AMELX PE=1 SV=2	1	hf1_10472_ebo_36_1_261219.ScanId;v=1;d1=28557.28557.5	controllerType=0 controllerNumber=1 scan=28557	60.0654
29730:6	1	S.MP[+15.995]LPPHPGHPGYINFSY[+15.995]EVLTPLKW[+31.990]YQSMIRHPYP.S		P[+16], W[+32], Y[+16]	705.348	6	4227.05	4227.06	0	-2.2	17	Non	27.64	27.64	0.14	1.22	1509	>sp|P02817|AMELX_BOVIN Amelogenin, X isoform OS=Bos taurus OX=9913 GN=AMELX PE=1 SV=2	1	hf1_10472_ebo_36_1_261219.ScanId;v=1;d1=22460.22460.6	controllerType=0 controllerNumber=1 scan=22460	49.0015
32520:6	1	S.MP[+15.995]LPPHPGHPGYINFS[+79.966]YEVLTPLKWY[+15.995]QSMIRHPYP.S		P[+16], S[+80], Y[+16]	713.347	6	4275.04	4275.04	0	1.2	17	Non	27.94	27.94	0	2.21	1509	>sp|P02817|AMELX_BOVIN Amelogenin, X isoform OS=Bos taurus OX=9913 GN=AMELX PE=1 SV=2	1	hf1_10472_ebo_36_1_261219.ScanId;v=1;d1=24271.24271.5	controllerType=0 controllerNumber=1 scan=24271	52.2832
37528:6	1	S.MP[+15.995]LPPHPGHPGYINFS[+79.966]YEVLTPLKWYQSMIR[+0.984]HPYP.S		P[+16], R[+1], S[+80]	710.677	6	4259.02	4260.03	-1	0.1	17	Non	31.85	31.85	0	2.39	1509	>sp|P02817|AMELX_BOVIN Amelogenin, X isoform OS=Bos taurus OX=9913 GN=AMELX PE=1 SV=2	1	hf1_10472_ebo_36_1_261219.ScanId;v=1;d1=27454.27454.6	controllerType=0 controllerNumber=1 scan=27454	58.0825
36788:4	1	S.MP[+15.995]LPPHPGHPGYINF[+31.990]SY[+31.990]EVLTPLKWYQSMIRHPYP.S		F[+32], P[+16], Y[+32]	1061.52	4	4243.07	4243.06	0	2.2	17	Non	35.47	13.07	4	2.21	1509	>sp|P02817|AMELX_BOVIN Amelogenin, X isoform OS=Bos taurus OX=9913 GN=AMELX PE=1 SV=2	1	hf1_10472_ebo_36_1_261219.ScanId;v=1;d1=27005.27005.4	controllerType=0 controllerNumber=1 scan=27005	57.2809
27045:4	1	S.M[+15.995]PLPPHPGHPGYINFS[+79.966]YEVLTPLKWYQSM[+31.990]IRHPYP.S		M[+16][+32], S[+80]	1073.77	4	4292.07	4291.03	1	8	17	Non	39.14	39.14	7.84	2.22	1509	>sp|P02817|AMELX_BOVIN Amelogenin, X isoform OS=Bos taurus OX=9913 GN=AMELX PE=1 SV=2	1	hf1_10472_ebo_36_1_261219.ScanId;v=1;d1=20769.20769.3	controllerType=0 controllerNumber=1 scan=20769	45.9479
34008:6	1	S.MPLPPHPGHPGYINFS[+79.966]YEVLTPLKWYQSMIR[+0.984]H[+15.995]PYP.S		H[+16], R[+1], S[+80]	710.846	6	4260.04	4260.03	0	2.7	17	Non	49.59	49.59	4	2.23	1509	>sp|P02817|AMELX_BOVIN Amelogenin, X isoform OS=Bos taurus OX=9913 GN=AMELX PE=1 SV=2	1	hf1_10472_ebo_36_1_261219.ScanId;v=1;d1=25250.25250.6	controllerType=0 controllerNumber=1 scan=25250	54.1009
39739:5	1	S.M[+15.995]PLPPHPGHPGYINFS[+79.966]YEVLTPLKWYQSM[+15.995]IRHPYP.S		M[+16]*2, S[+80]	855.817	5	4275.06	4275.04	0	3.9	17	Non	51.03	51.03	0	2.55	1509	>sp|P02817|AMELX_BOVIN Amelogenin, X isoform OS=Bos taurus OX=9913 GN=AMELX PE=1 SV=2	1	hf1_10472_ebo_36_1_261219.ScanId;v=1;d1=28858.28858.5	controllerType=0 controllerNumber=1 scan=28858	60.613
27182:6	1	S.MP[+15.995]LPPHPGHPGYINFS[+79.966]YEVLTP[+31.990]LKWYQSMIRHPYP.S		P[+16][+32], S[+80]	716.014	6	4291.05	4291.03	0	3.8	17	Non	58.25	58.25	0	2.44	1509	>sp|P02817|AMELX_BOVIN Amelogenin, X isoform OS=Bos taurus OX=9913 GN=AMELX PE=1 SV=2	1	hf1_10472_ebo_36_1_261219.ScanId;v=1;d1=20857.20857.6	controllerType=0 controllerNumber=1 scan=20857	46.1023
30900:5	1	S.MPLPPHPGHPGYINFS[+79.966]YEVLTPLKWYQSMIR[+0.984]H[+15.995]PYP.S		H[+16], R[+1], S[+80]	853.014	5	4261.04	4260.03	1	2.3	17	Non	60.17	17.77	8.67	1.02	1509	>sp|P02817|AMELX_BOVIN Amelogenin, X isoform OS=Bos taurus OX=9913 GN=AMELX PE=1 SV=2	1	hf1_10472_ebo_36_1_261219.ScanId;v=1;d1=23214.23214.5	controllerType=0 controllerNumber=1 scan=23214	50.3598
28247:4	1	S.M[+15.995]PLPPHPGHPGYINFS[+79.966]YEVLTPLKWYQSM[+15.995]IRHPYP.S		M[+16]*2, S[+80]	1069.77	4	4276.06	4275.04	1	5.1	17	Non	63.76	63.76	0	2.24	1509	>sp|P02817|AMELX_BOVIN Amelogenin, X isoform OS=Bos taurus OX=9913 GN=AMELX PE=1 SV=2	1	hf1_10472_ebo_36_1_261219.ScanId;v=1;d1=21530.21530.5	controllerType=0 controllerNumber=1 scan=21530	47.332
42336:5	1	S.MP[+15.995]LPPHPGHPGYINFS[+79.966]YEVLTPLKW[+15.995]YQSMIRHPYP.S		P[+16], S[+80], W[+16]	855.817	5	4275.06	4275.04	0	4.4	17	Non	64.17	64.17	0	2.92	1509	>sp|P02817|AMELX_BOVIN Amelogenin, X isoform OS=Bos taurus OX=9913 GN=AMELX PE=1 SV=2	1	hf1_10472_ebo_36_1_261219.ScanId;v=1;d1=30490.30490.5	controllerType=0 controllerNumber=1 scan=30490	63.5372
27548:6	1	S.MP[+15.995]LPPHPGHPGYINFS[+79.966]YEVLTPLKW[+31.990]YQSMIRHPYP.S		P[+16], S[+80], W[+32]	716.181	6	4292.05	4291.03	1	3.5	17	Non	73.16	73.16	0	2.23	1509	>sp|P02817|AMELX_BOVIN Amelogenin, X isoform OS=Bos taurus OX=9913 GN=AMELX PE=1 SV=2	1	hf1_10472_ebo_36_1_261219.ScanId;v=1;d1=21093.21093.6	controllerType=0 controllerNumber=1 scan=21093	46.5285
36804:5	1	S.MPLPPHPGHPGYINF[+31.990]SY[+31.990]EVLTPLKW[+15.995]YQSMIRHPYP.S		F[+32], W[+16], Y[+32]	849.618	5	4244.06	4243.06	1	-0.2	17	Non	76.9	76.9	0	2.42	1509	>sp|P02817|AMELX_BOVIN Amelogenin, X isoform OS=Bos taurus OX=9913 GN=AMELX PE=1 SV=2	1	hf1_10472_ebo_36_1_261219.ScanId;v=1;d1=27014.27014.6	controllerType=0 controllerNumber=1 scan=27014	57.2974
41329:5	1	S.MP[+15.995]LPPHPGHPGYINFS[+79.966]YEVLTPLK[+15.995]WYQSMIRHPYP.S		K[+16], P[+16], S[+80]	856.013	5	4276.04	4275.04	1	-1	17	Non	77.32	77.32	0	2.66	1509	>sp|P02817|AMELX_BOVIN Amelogenin, X isoform OS=Bos taurus OX=9913 GN=AMELX PE=1 SV=2	1	hf1_10472_ebo_36_1_261219.ScanId;v=1;d1=29858.29858.5	controllerType=0 controllerNumber=1 scan=29858	62.4052
37146:4	1	S.MP[+15.995]LPPHPGHPGYIN[+0.984]FS[+79.966]YEVLTPLKWYQSMIRHPYP.S		N[+1], P[+16], S[+80]	1066.02	4	4261.05	4260.03	1	3.4	17	Non	84.03	84.03	4	2.22	1509	>sp|P02817|AMELX_BOVIN Amelogenin, X isoform OS=Bos taurus OX=9913 GN=AMELX PE=1 SV=2	1	hf1_10472_ebo_36_1_261219.ScanId;v=1;d1=27223.27223.4	controllerType=0 controllerNumber=1 scan=27223	57.672
30934:6	1	S.MP[+15.995]LPPHPGHPGYINFS[+79.966]YEVLTP[+31.990]LKWYQSMIRHPYP.S		P[+16][+32], S[+80]	716.013	6	4291.04	4291.03	0	2.2	17	Non	84.69	84.69	0	2.51	1509	>sp|P02817|AMELX_BOVIN Amelogenin, X isoform OS=Bos taurus OX=9913 GN=AMELX PE=1 SV=2	1	hf1_10472_ebo_36_1_261219.ScanId;v=1;d1=23239.23239.6	controllerType=0 controllerNumber=1 scan=23239	50.4063
27219:6	1	S.MP[+15.995]LPPHPGHPGYINFS[+79.966]YEVLTPLKWY[+15.995]QSMIRHPYP.S		P[+16], S[+80], Y[+16]	713.517	6	4276.06	4275.04	1	5.2	17	Non	91.56	91.56	0	2.33	1509	>sp|P02817|AMELX_BOVIN Amelogenin, X isoform OS=Bos taurus OX=9913 GN=AMELX PE=1 SV=2	1	hf1_10472_ebo_36_1_261219.ScanId;v=1;d1=20881.20881.6	controllerType=0 controllerNumber=1 scan=20881	46.1469
30273:6	1	S.M[+15.995]PLPPHPGHPGYINFS[+79.966]YEVLTPLKWY[+31.990]QSMIRHPYP.S		M[+16], S[+80], Y[+32]	715.846	6	4290.04	4291.03	-1	2.6	17	Non	92.73	92.73	0	2.74	1509	>sp|P02817|AMELX_BOVIN Amelogenin, X isoform OS=Bos taurus OX=9913 GN=AMELX PE=1 SV=2	1	hf1_10472_ebo_36_1_261219.ScanId;v=1;d1=22809.22809.6	controllerType=0 controllerNumber=1 scan=22809	49.631
38964:5	1	S.M[+15.995]PLPPHPGHPGYINFS[+79.966]YEVLTPLKWYQSM[+15.995]IRHPYP.S		M[+16]*2, S[+80]	856.017	5	4276.06	4275.04	1	3.5	17	Non	93.67	93.67	14.82	2.27	1509	>sp|P02817|AMELX_BOVIN Amelogenin, X isoform OS=Bos taurus OX=9913 GN=AMELX PE=1 SV=2	1	hf1_10472_ebo_36_1_261219.ScanId;v=1;d1=28359.28359.5	controllerType=0 controllerNumber=1 scan=28359	59.7081
32321:5	1	S.MPLPPHPGHPGYINFS[+79.966]YEVLTPLKWYQ[+0.984]SM[+31.990]IRHPYP.S		M[+32], Q[+1], S[+80]	856.214	5	4277.04	4276.02	1	3.5	17	Non	109.44	10.21	10.21	2.23	1509	>sp|P02817|AMELX_BOVIN Amelogenin, X isoform OS=Bos taurus OX=9913 GN=AMELX PE=1 SV=2	1	hf1_10472_ebo_36_1_261219.ScanId;v=1;d1=24138.24138.5	controllerType=0 controllerNumber=1 scan=24138	52.0393
36150:6	1	S.MP[+15.995]LPPHPGHPGYINFS[+79.966]YEVLTPLKWYQ[+0.984]SMIRHPYP.S		P[+16], Q[+1], S[+80]	710.848	6	4260.05	4260.03	0	6.3	17	Non	111.34	111.34	4	3.17	1509	>sp|P02817|AMELX_BOVIN Amelogenin, X isoform OS=Bos taurus OX=9913 GN=AMELX PE=1 SV=2	1	hf1_10472_ebo_36_1_261219.ScanId;v=1;d1=26611.26611.6	controllerType=0 controllerNumber=1 scan=26611	56.5707
28368:5	1	S.MP[+15.995]LPPHPGHPGYINFS[+79.966]YEVLTP[+15.995]LKWYQSMIRHPYP.S		P[+16]*2, S[+80]	855.815	5	4275.05	4275.04	0	2.2	17	Non	115.21	115.21	5.16	2.25	1509	>sp|P02817|AMELX_BOVIN Amelogenin, X isoform OS=Bos taurus OX=9913 GN=AMELX PE=1 SV=2	1	hf1_10472_ebo_36_1_261219.ScanId;v=1;d1=21607.21607.5	controllerType=0 controllerNumber=1 scan=21607	47.468
35783:4	1	S.MP[+15.995]LPPHPGHPGYINFS[+79.966]YEVLTPLKWYQSM[+15.995]IRHPYP.S		M[+16], P[+16], S[+80]	1069.77	4	4276.05	4275.04	1	1.2	17	Non	119.64	119.64	0	2.21	1509	>sp|P02817|AMELX_BOVIN Amelogenin, X isoform OS=Bos taurus OX=9913 GN=AMELX PE=1 SV=2	1	hf1_10472_ebo_36_1_261219.ScanId;v=1;d1=26377.26377.4	controllerType=0 controllerNumber=1 scan=26377	56.1531
27410:4	1	S.MP[+15.995]LPPHPGHPGYINFS[+79.966]YEVLTPLKW[+31.990]YQSMIRHPYP.S		P[+16], S[+80], W[+32]	1073.52	4	4291.04	4291.03	0	2.5	17	Non	119.91	119.91	4	2.22	1509	>sp|P02817|AMELX_BOVIN Amelogenin, X isoform OS=Bos taurus OX=9913 GN=AMELX PE=1 SV=2	1	hf1_10472_ebo_36_1_261219.ScanId;v=1;d1=21005.21005.3	controllerType=0 controllerNumber=1 scan=21005	46.369
40371:5	1	S.MP[+15.995]LPPHPGHPGYINFS[+79.966]YEVLTPLKW[+15.995]YQSMIRHPYP.S		P[+16], S[+80], W[+16]	855.815	5	4275.04	4275.04	0	1.5	17	Non	125.31	125.31	0	2.78	1509	>sp|P02817|AMELX_BOVIN Amelogenin, X isoform OS=Bos taurus OX=9913 GN=AMELX PE=1 SV=2	1	hf1_10472_ebo_36_1_261219.ScanId;v=1;d1=29252.29252.5	controllerType=0 controllerNumber=1 scan=29252	61.318
35748:4	1	S.MP[+15.995]LPPHPGHPGYINFSYEVLTP[+31.990]LKW[+31.990]YQSMIRHPYP.S		P[+16][+32], W[+32]	1061.27	4	4242.06	4243.06	-1	1	17	Non	130.65	130.65	5.8	2.58	1509	>sp|P02817|AMELX_BOVIN Amelogenin, X isoform OS=Bos taurus OX=9913 GN=AMELX PE=1 SV=2	1	hf1_10472_ebo_36_1_261219.ScanId;v=1;d1=26355.26355.4	controllerType=0 controllerNumber=1 scan=26355	56.1141
37430:5	1	S.M[+15.995]PLPPHPGHPGYINFS[+79.966]YEVLTPLKWYQSM[+15.995]IRHPYP.S		M[+16]*2, S[+80]	856.022	5	4276.08	4275.04	1	8.9	17	Non	136.53	136.53	0	3.16	1509	>sp|P02817|AMELX_BOVIN Amelogenin, X isoform OS=Bos taurus OX=9913 GN=AMELX PE=1 SV=2	1	hf1_10472_ebo_36_1_261219.ScanId;v=1;d1=27395.27395.6	controllerType=0 controllerNumber=1 scan=27395	57.9787
29023:6	1	S.MP[+15.995]LPPHPGHPGYINFS[+79.966]YEVLTPLKW[+31.990]YQSMIRHPYP.S		P[+16], S[+80], W[+32]	716.179	6	4292.04	4291.03	1	0.6	17	Non	139.5	139.5	0	2.95	1509	>sp|P02817|AMELX_BOVIN Amelogenin, X isoform OS=Bos taurus OX=9913 GN=AMELX PE=1 SV=2	1	hf1_10472_ebo_36_1_261219.ScanId;v=1;d1=22022.22022.6	controllerType=0 controllerNumber=1 scan=22022	48.2129
36742:5	1	S.M[+15.995]PLPPHPGHPGYINFS[+79.966]YEVLTPLKWYQSM[+15.995]IRHPYP.S		M[+16]*2, S[+80]	856.016	5	4276.05	4275.04	1	2.6	17	Non	151.37	151.37	0	2.95	1509	>sp|P02817|AMELX_BOVIN Amelogenin, X isoform OS=Bos taurus OX=9913 GN=AMELX PE=1 SV=2	1	hf1_10472_ebo_36_1_261219.ScanId;v=1;d1=26976.26976.3	controllerType=0 controllerNumber=1 scan=26976	57.231
42023:5	1	S.MP[+15.995]LPPHPGHPGYINFS[+79.966]YEVLTP[+15.995]LKWYQSMIRHPYP.S		P[+16]*2, S[+80]	855.819	5	4275.07	4275.04	0	6.3	17	Non	151.87	151.87	4	3.78	1509	>sp|P02817|AMELX_BOVIN Amelogenin, X isoform OS=Bos taurus OX=9913 GN=AMELX PE=1 SV=2	1	hf1_10472_ebo_36_1_261219.ScanId;v=1;d1=30296.30296.5	controllerType=0 controllerNumber=1 scan=30296	63.189
32150:6	1	S.MP[+15.995]LPPHPGHPGYINFS[+79.966]YEVLTPLKWY[+15.995]QSMIRHPYP.S		P[+16], S[+80], Y[+16]	713.349	6	4275.06	4275.04	0	4.5	17	Non	155.42	155.42	0	3.19	1509	>sp|P02817|AMELX_BOVIN Amelogenin, X isoform OS=Bos taurus OX=9913 GN=AMELX PE=1 SV=2	1	hf1_10472_ebo_36_1_261219.ScanId;v=1;d1=24030.24030.6	controllerType=0 controllerNumber=1 scan=24030	51.8418
38314:5	1	S.MP[+15.995]LPPHPGHPGYINFS[+79.966]YEVLTPLKWYQSMIRH[+15.995]PYP.S		H[+16], P[+16], S[+80]	856.016	5	4276.05	4275.04	1	2.6	17	Non	157.77	157.77	0.4	3.35	1509	>sp|P02817|AMELX_BOVIN Amelogenin, X isoform OS=Bos taurus OX=9913 GN=AMELX PE=1 SV=2	1	hf1_10472_ebo_36_1_261219.ScanId;v=1;d1=27958.27958.5	controllerType=0 controllerNumber=1 scan=27958	58.9935
32404:4	1	S.MPLPPHP[+31.990]GHPGYIN[+0.984]FS[+79.966]YEVLTPLKWYQSMIRHPYP.S		N[+1], P[+32], S[+80]	1070.01	4	4277.03	4276.02	1	2	17	Non	159.2	82.04	25.34	2.21	1509	>sp|P02817|AMELX_BOVIN Amelogenin, X isoform OS=Bos taurus OX=9913 GN=AMELX PE=1 SV=2	1	hf1_10472_ebo_36_1_261219.ScanId;v=1;d1=24198.24198.4	controllerType=0 controllerNumber=1 scan=24198	52.1501
28053:5	1	S.MP[+15.995]LPPHPGHPGYINFS[+79.966]YEVLTP[+15.995]LKWYQSMIRHPYP.S		P[+16]*2, S[+80]	856.014	5	4276.04	4275.04	1	0.1	17	Non	163.29	163.29	3.08	3.65	1509	>sp|P02817|AMELX_BOVIN Amelogenin, X isoform OS=Bos taurus OX=9913 GN=AMELX PE=1 SV=2	1	hf1_10472_ebo_36_1_261219.ScanId;v=1;d1=21410.21410.5	controllerType=0 controllerNumber=1 scan=21410	47.1126
29622:6	1	S.MP[+15.995]LPPHPGHPGYINFSYEVLTPLKWYQSM[+31.990]IR[+0.984]HPYP.S		M[+32], P[+16], R[+1]	702.684	6	4211.07	4212.05	-1	4.5	17	Non	165.45	165.45	4	5.03	1509	>sp|P02817|AMELX_BOVIN Amelogenin, X isoform OS=Bos taurus OX=9913 GN=AMELX PE=1 SV=2	1	hf1_10472_ebo_36_1_261219.ScanId;v=1;d1=22389.22389.6	controllerType=0 controllerNumber=1 scan=22389	48.8741
31552:6	1	S.MP[+15.995]LPPHPGHPGYINFS[+79.966]YEVLTP[+31.990]LKWYQSMIRHPYP.S		P[+16][+32], S[+80]	716.178	6	4292.03	4291.03	1	-1.8	17	Non	169.88	169.88	4	3.86	1509	>sp|P02817|AMELX_BOVIN Amelogenin, X isoform OS=Bos taurus OX=9913 GN=AMELX PE=1 SV=2	1	hf1_10472_ebo_36_1_261219.ScanId;v=1;d1=23643.23643.6	controllerType=0 controllerNumber=1 scan=23643	51.1313
29361:6	1	S.MP[+15.995]LPPHPGHPGYINFS[+79.966]YEVLTPLKW[+31.990]YQSMIRHPYP.S		P[+16], S[+80], W[+32]	716.181	6	4292.05	4291.03	1	2.8	17	Non	171.58	171.58	0.64	4.13	1509	>sp|P02817|AMELX_BOVIN Amelogenin, X isoform OS=Bos taurus OX=9913 GN=AMELX PE=1 SV=2	1	hf1_10472_ebo_36_1_261219.ScanId;v=1;d1=22231.22231.6	controllerType=0 controllerNumber=1 scan=22231	48.5924
33420:4	1	S.MP[+15.995]LPPHPGHPGYINFS[+79.966]YEVLTPLKWYQSM[+31.990]IRHPYP.S		M[+32], P[+16], S[+80]	1073.52	4	4291.06	4291.03	0	7.1	17	Non	175.86	175.86	4	3.69	1509	>sp|P02817|AMELX_BOVIN Amelogenin, X isoform OS=Bos taurus OX=9913 GN=AMELX PE=1 SV=2	1	hf1_10472_ebo_36_1_261219.ScanId;v=1;d1=24869.24869.4	controllerType=0 controllerNumber=1 scan=24869	53.3978
35467:4	1	S.MP[+15.995]LPPHPGHPGYINFS[+79.966]YEVLTPLKWY[+15.995]QSMIRHPYP.S		P[+16], S[+80], Y[+16]	1069.77	4	4276.05	4275.04	1	1	17	Non	187.28	187.28	1.22	3.08	1509	>sp|P02817|AMELX_BOVIN Amelogenin, X isoform OS=Bos taurus OX=9913 GN=AMELX PE=1 SV=2	1	hf1_10472_ebo_36_1_261219.ScanId;v=1;d1=26177.26177.4	controllerType=0 controllerNumber=1 scan=26177	55.793
37953:5	1	S.MP[+15.995]LPPHPGHPGYINFS[+79.966]YEVLTPLKWYQSMIRH[+15.995]PYP.S		H[+16], P[+16], S[+80]	856.014	5	4276.04	4275.04	1	-0.7	17	Non	196.26	196.26	0.4	4.1	1509	>sp|P02817|AMELX_BOVIN Amelogenin, X isoform OS=Bos taurus OX=9913 GN=AMELX PE=1 SV=2	1	hf1_10472_ebo_36_1_261219.ScanId;v=1;d1=27724.27724.5	controllerType=0 controllerNumber=1 scan=27724	58.5724
30233:5	1	S.MP[+15.995]LPPHPGHPGYINFSY[+15.995]EVLTP[+31.990]LKWYQSMIRHPYP.S		P[+16][+32], Y[+16]	846.418	5	4228.06	4227.06	1	-1.6	17	Non	204.88	204.88	3.31	4.14	1509	>sp|P02817|AMELX_BOVIN Amelogenin, X isoform OS=Bos taurus OX=9913 GN=AMELX PE=1 SV=2	1	hf1_10472_ebo_36_1_261219.ScanId;v=1;d1=22781.22781.5	controllerType=0 controllerNumber=1 scan=22781	49.5801
32564:5	1	S.MPLPPHPGHPGY[+31.990]INFSY[+31.990]EVLTPLKWYQSMIRH[+15.995]PYP.S		H[+16], Y[+32]*2	849.615	5	4244.04	4243.06	1	-3.6	17	Non	210.38	210.38	0.61	3.32	1509	>sp|P02817|AMELX_BOVIN Amelogenin, X isoform OS=Bos taurus OX=9913 GN=AMELX PE=1 SV=2	1	hf1_10472_ebo_36_1_261219.ScanId;v=1;d1=24299.24299.5	controllerType=0 controllerNumber=1 scan=24299	52.334
31231:6	1	S.M[+15.995]PLPPHPGHPGYINFS[+79.966]YEVLTPLKWYQSM[+31.990]IRHPYP.S		M[+16][+32], S[+80]	716.013	6	4291.04	4291.03	0	2.1	17	Non	228.33	228.33	0.68	3.97	1509	>sp|P02817|AMELX_BOVIN Amelogenin, X isoform OS=Bos taurus OX=9913 GN=AMELX PE=1 SV=2	1	hf1_10472_ebo_36_1_261219.ScanId;v=1;d1=23437.23437.6	controllerType=0 controllerNumber=1 scan=23437	50.7617
37646:5	1	S.M[+15.995]PLPPHPGHPGYINFS[+79.966]YEVLTPLKWY[+15.995]QSMIRHPYP.S		M[+16], S[+80], Y[+16]	856.018	5	4276.06	4275.04	1	4.6	17	Non	230.88	230.88	0	4.94	1509	>sp|P02817|AMELX_BOVIN Amelogenin, X isoform OS=Bos taurus OX=9913 GN=AMELX PE=1 SV=2	1	hf1_10472_ebo_36_1_261219.ScanId;v=1;d1=27532.27532.5	controllerType=0 controllerNumber=1 scan=27532	58.2267
29673:6	1	S.MP[+15.995]LPPHPGHPGYINFS[+79.966]YEVLTPLKW[+31.990]YQSMIRHPYP.S		P[+16], S[+80], W[+32]	716.18	6	4292.05	4291.03	1	2	17	Non	246.47	246.47	0	5.3	1509	>sp|P02817|AMELX_BOVIN Amelogenin, X isoform OS=Bos taurus OX=9913 GN=AMELX PE=1 SV=2	1	hf1_10472_ebo_36_1_261219.ScanId;v=1;d1=22424.22424.6	controllerType=0 controllerNumber=1 scan=22424	48.9385
35115:5	1	S.M[+15.995]PLPPHPGHPGYINFS[+79.966]YEVLTPLKWYQSM[+15.995]IRHPYP.S		M[+16]*2, S[+80]	856.012	5	4276.03	4275.04	1	-2.4	17	Non	265.99	265.99	11.44	5.08	1509	>sp|P02817|AMELX_BOVIN Amelogenin, X isoform OS=Bos taurus OX=9913 GN=AMELX PE=1 SV=2	1	hf1_10472_ebo_36_1_261219.ScanId;v=1;d1=25952.25952.5	controllerType=0 controllerNumber=1 scan=25952	55.3869
29174:4	1	S.M[+15.995]PLPPHPGHPGYINFS[+79.966]YEVLTPLKWYQSMIRH[+15.995]PYP.S		H[+16], M[+16], S[+80]	1069.52	4	4275.06	4275.04	0	4.1	17	Non	269.11	269.11	13.46	5.07	1509	>sp|P02817|AMELX_BOVIN Amelogenin, X isoform OS=Bos taurus OX=9913 GN=AMELX PE=1 SV=2	1	hf1_10472_ebo_36_1_261219.ScanId;v=1;d1=22115.22115.4	controllerType=0 controllerNumber=1 scan=22115	48.3824
28680:5	1	S.M[+15.995]PLPPHPGHPGYINFS[+79.966]YEVLTPLKW[+15.995]YQSMIRHPYP.S		M[+16], S[+80], W[+16]	855.82	5	4275.07	4275.04	0	7.3	17	Non	271.52	271.52	0.54	5.74	1509	>sp|P02817|AMELX_BOVIN Amelogenin, X isoform OS=Bos taurus OX=9913 GN=AMELX PE=1 SV=2	1	hf1_10472_ebo_36_1_261219.ScanId;v=1;d1=21808.21808.5	controllerType=0 controllerNumber=1 scan=21808	47.8257
26699:5	1	S.MP[+15.995]LPPHPGHPGYINFS[+79.966]YEVLTPLKW[+31.990]YQSMIRHPYP.S		P[+16], S[+80], W[+32]	859.016	5	4291.05	4291.03	0	4.5	17	Non	272.41	272.41	0.48	6.27	1509	>sp|P02817|AMELX_BOVIN Amelogenin, X isoform OS=Bos taurus OX=9913 GN=AMELX PE=1 SV=2	1	hf1_10472_ebo_36_1_261219.ScanId;v=1;d1=20547.20547.5	controllerType=0 controllerNumber=1 scan=20547	45.5566
37468:4	1	S.MPLPPHPGHPGYINFS[+79.966]YEVLTPLKW[+15.995]YQ[+0.984]SMIRHPYP.S		Q[+1], S[+80], W[+16]	1066.01	4	4261.03	4260.03	1	-0.9	17	Non	272.93	272.93	0.03	4.79	1509	>sp|P02817|AMELX_BOVIN Amelogenin, X isoform OS=Bos taurus OX=9913 GN=AMELX PE=1 SV=2	1	hf1_10472_ebo_36_1_261219.ScanId;v=1;d1=27418.27418.4	controllerType=0 controllerNumber=1 scan=27418	58.0194
29978:6	1	S.MP[+15.995]LPPHPGHPGYINFS[+79.966]YEVLTPLKWY[+31.990]QSMIRHPYP.S		P[+16], S[+80], Y[+32]	716.014	6	4291.05	4291.03	0	4	17	Non	277.1	277.1	5.8	5.51	1509	>sp|P02817|AMELX_BOVIN Amelogenin, X isoform OS=Bos taurus OX=9913 GN=AMELX PE=1 SV=2	1	hf1_10472_ebo_36_1_261219.ScanId;v=1;d1=22617.22617.6	controllerType=0 controllerNumber=1 scan=22617	49.2813
27839:6	1	S.M[+15.995]PLPPHPGHPGYINFS[+79.966]YEVLTPLKW[+31.990]YQSMIRHPYP.S		M[+16], S[+80], W[+32]	716.015	6	4291.06	4291.03	0	5.2	17	Non	277.7	277.7	0.37	6.03	1509	>sp|P02817|AMELX_BOVIN Amelogenin, X isoform OS=Bos taurus OX=9913 GN=AMELX PE=1 SV=2	1	hf1_10472_ebo_36_1_261219.ScanId;v=1;d1=21278.21278.6	controllerType=0 controllerNumber=1 scan=21278	46.8723
37013:5	1	S.MP[+15.995]LPPHPGHPGYINFS[+79.966]YEVLTPLKWYQSM[+15.995]IRHPYP.S		M[+16], P[+16], S[+80]	856.015	5	4276.05	4275.04	1	0.8	17	Non	278.3	278.3	4.56	5.54	1509	>sp|P02817|AMELX_BOVIN Amelogenin, X isoform OS=Bos taurus OX=9913 GN=AMELX PE=1 SV=2	1	hf1_10472_ebo_36_1_261219.ScanId;v=1;d1=27141.27141.5	controllerType=0 controllerNumber=1 scan=27141	57.5276
32043:5	1	S.MP[+15.995]LPPHPGHPGYINFS[+79.966]YEVLTP[+31.990]LKWYQSMIRHPYP.S		P[+16][+32], S[+80]	859.214	5	4292.04	4291.03	1	1.3	17	Non	278.4	278.4	4	5.54	1509	>sp|P02817|AMELX_BOVIN Amelogenin, X isoform OS=Bos taurus OX=9913 GN=AMELX PE=1 SV=2	1	hf1_10472_ebo_36_1_261219.ScanId;v=1;d1=23963.23963.5	controllerType=0 controllerNumber=1 scan=23963	51.7173
30967:6	1	S.MP[+15.995]LPPHPGHPGYINFS[+79.966]YEVLTPLKWY[+15.995]QSMIRHPYP.S		P[+16], S[+80], Y[+16]	713.348	6	4275.05	4275.04	0	3.8	17	Non	281.07	281.07	0	5.68	1509	>sp|P02817|AMELX_BOVIN Amelogenin, X isoform OS=Bos taurus OX=9913 GN=AMELX PE=1 SV=2	1	hf1_10472_ebo_36_1_261219.ScanId;v=1;d1=23260.23260.6	controllerType=0 controllerNumber=1 scan=23260	50.4438
33803:5	1	S.MP[+15.995]LPPHPGHPGYINFS[+79.966]YEVLTPLKWYQSM[+31.990]IRHPYP.S		M[+32], P[+16], S[+80]	859.215	5	4292.05	4291.03	1	2.1	17	Non	285.37	285.37	0.19	5.71	1509	>sp|P02817|AMELX_BOVIN Amelogenin, X isoform OS=Bos taurus OX=9913 GN=AMELX PE=1 SV=2	1	hf1_10472_ebo_36_1_261219.ScanId;v=1;d1=25115.25115.5	controllerType=0 controllerNumber=1 scan=25115	53.8502
33446:5	1	S.MPLPPHPGHPGYINFS[+79.966]YEVLTPLKW[+15.995]YQ[+0.984]SMIRHPYP.S		Q[+1], S[+80], W[+16]	853.013	5	4261.03	4260.03	1	0.7	17	Non	285.47	285.47	0	5.71	1509	>sp|P02817|AMELX_BOVIN Amelogenin, X isoform OS=Bos taurus OX=9913 GN=AMELX PE=1 SV=2	1	hf1_10472_ebo_36_1_261219.ScanId;v=1;d1=24886.24886.5	controllerType=0 controllerNumber=1 scan=24886	53.4292
34442:4	1	S.M[+15.995]PLPPHPGHPGYINFS[+79.966]YEVLTPLKWY[+15.995]QSMIRHPYP.S		M[+16], S[+80], Y[+16]	1069.77	4	4276.06	4275.04	1	4.5	17	Non	290.2	290.2	2.3	5.76	1509	>sp|P02817|AMELX_BOVIN Amelogenin, X isoform OS=Bos taurus OX=9913 GN=AMELX PE=1 SV=2	1	hf1_10472_ebo_36_1_261219.ScanId;v=1;d1=25526.25526.4	controllerType=0 controllerNumber=1 scan=25526	54.6027
31140:5	1	S.MP[+15.995]LPPHPGHPGYINFS[+79.966]YEVLTPLKWYQSM[+31.990]IRHPYP.S		M[+32], P[+16], S[+80]	859.213	5	4292.04	4291.03	1	0.2	17	Non	291.66	291.66	4	5.71	1509	>sp|P02817|AMELX_BOVIN Amelogenin, X isoform OS=Bos taurus OX=9913 GN=AMELX PE=1 SV=2	1	hf1_10472_ebo_36_1_261219.ScanId;v=1;d1=23371.23371.5	controllerType=0 controllerNumber=1 scan=23371	50.6427
29739:4	1	S.M[+15.995]PLPPHPGHPGYINFS[+79.966]YEVLTPLKWYQSM[+15.995]IRHPYP.S		M[+16]*2, S[+80]	1069.27	4	4274.06	4275.04	-1	5.3	17	Non	291.87	291.87	0	6.14	1509	>sp|P02817|AMELX_BOVIN Amelogenin, X isoform OS=Bos taurus OX=9913 GN=AMELX PE=1 SV=2	1	hf1_10472_ebo_36_1_261219.ScanId;v=1;d1=22465.22465.4	controllerType=0 controllerNumber=1 scan=22465	49.0091
34048:4	1	S.M[+15.995]PLPPHPGHPGYINFS[+79.966]YEVLTPLKWYQSM[+15.995]IRHPYP.S		M[+16]*2, S[+80]	1069.52	4	4275.05	4275.04	0	2.3	17	Non	299.69	299.69	0	5.24	1509	>sp|P02817|AMELX_BOVIN Amelogenin, X isoform OS=Bos taurus OX=9913 GN=AMELX PE=1 SV=2	1	hf1_10472_ebo_36_1_261219.ScanId;v=1;d1=25277.25277.4	controllerType=0 controllerNumber=1 scan=25277	54.1505
32066:4	1	S.M[+15.995]PLPPHPGHPGYINFS[+79.966]YEVLTPLKWYQSM[+31.990]IRHPYP.S		M[+16][+32], S[+80]	1073.77	4	4292.05	4291.03	1	2.2	17	Non	307.59	307.59	22.01	4.78	1509	>sp|P02817|AMELX_BOVIN Amelogenin, X isoform OS=Bos taurus OX=9913 GN=AMELX PE=1 SV=2	1	hf1_10472_ebo_36_1_261219.ScanId;v=1;d1=23976.23976.4	controllerType=0 controllerNumber=1 scan=23976	51.7399
30684:6	1	S.MP[+15.995]LPPHPGHPGYINFS[+79.966]YEVLTPLKW[+15.995]YQSMIRHPYP.S		P[+16], S[+80], W[+16]	713.35	6	4275.06	4275.04	0	5.4	17	Non	317.91	317.91	0.67	6.43	1509	>sp|P02817|AMELX_BOVIN Amelogenin, X isoform OS=Bos taurus OX=9913 GN=AMELX PE=1 SV=2	1	hf1_10472_ebo_36_1_261219.ScanId;v=1;d1=23074.23074.6	controllerType=0 controllerNumber=1 scan=23074	50.1051
33569:4	1	S.M[+15.995]PLPPHPGHPGYINFS[+79.966]YEVLTPLKWYQSM[+15.995]IRHPYP.S		M[+16]*2, S[+80]	1069.52	4	4275.05	4275.04	0	2.6	17	Non	318.52	318.52	0	5.24	1509	>sp|P02817|AMELX_BOVIN Amelogenin, X isoform OS=Bos taurus OX=9913 GN=AMELX PE=1 SV=2	1	hf1_10472_ebo_36_1_261219.ScanId;v=1;d1=24966.24966.4	controllerType=0 controllerNumber=1 scan=24966	53.5733
27741:5	1	S.M[+15.995]PLPPHPGHPGYINFS[+79.966]YEVLTPLKW[+15.995]YQSMIRHPYP.S		M[+16], S[+80], W[+16]	856.014	5	4276.04	4275.04	1	0.4	17	Non	318.91	318.91	0	5.71	1509	>sp|P02817|AMELX_BOVIN Amelogenin, X isoform OS=Bos taurus OX=9913 GN=AMELX PE=1 SV=2	1	hf1_10472_ebo_36_1_261219.ScanId;v=1;d1=21219.21219.5	controllerType=0 controllerNumber=1 scan=21219	46.766
45310:6	1	S.MP[+15.995]LPPHPGHPGYINFS[+79.966]YEVLTPLKW[+15.995]YQSMIRHPYP.S		P[+16], S[+80], W[+16]	713.351	6	4275.07	4275.04	0	6.7	17	Non	336.48	336.48	0	6.51	1509	>sp|P02817|AMELX_BOVIN Amelogenin, X isoform OS=Bos taurus OX=9913 GN=AMELX PE=1 SV=2	1	hf1_10472_ebo_36_1_261219.ScanId;v=1;d1=33705.33705.6	controllerType=0 controllerNumber=1 scan=33705	73.5882
32257:4	1	S.M[+15.995]PLPPHPGHPGYINFS[+79.966]YEVLTPLKW[+31.990]YQSMIRHPYP.S		M[+16], S[+80], W[+32]	1073.77	4	4292.06	4291.03	1	6.2	17	Non	338.93	338.93	2.44	5.92	1509	>sp|P02817|AMELX_BOVIN Amelogenin, X isoform OS=Bos taurus OX=9913 GN=AMELX PE=1 SV=2	1	hf1_10472_ebo_36_1_261219.ScanId;v=1;d1=24097.24097.4	controllerType=0 controllerNumber=1 scan=24097	51.963
35757:5	1	S.M[+15.995]PLPPHPGHPGYINFS[+79.966]YEVLTPLKWYQSM[+15.995]IRHPYP.S		M[+16]*2, S[+80]	856.016	5	4276.05	4275.04	1	2.6	17	Non	340.26	340.26	2.08	6.08	1509	>sp|P02817|AMELX_BOVIN Amelogenin, X isoform OS=Bos taurus OX=9913 GN=AMELX PE=1 SV=2	1	hf1_10472_ebo_36_1_261219.ScanId;v=1;d1=26361.26361.5	controllerType=0 controllerNumber=1 scan=26361	56.126
27462:5	1	S.MP[+15.995]LPPHPGHPGYINFS[+79.966]YEVLTPLKWY[+15.995]QSMIRHPYP.S		P[+16], S[+80], Y[+16]	855.817	5	4275.05	4275.04	0	3.7	17	Non	341.98	341.98	1.56	6.08	1509	>sp|P02817|AMELX_BOVIN Amelogenin, X isoform OS=Bos taurus OX=9913 GN=AMELX PE=1 SV=2	1	hf1_10472_ebo_36_1_261219.ScanId;v=1;d1=21038.21038.5	controllerType=0 controllerNumber=1 scan=21038	46.4306
36267:5	1	S.M[+15.995]PLPPHPGHPGYINFS[+79.966]YEVLTP[+15.995]LKWYQSMIRHPYP.S		M[+16], P[+16], S[+80]	856.016	5	4276.05	4275.04	1	2.6	17	Non	342.08	342.08	3.19	6.3	1509	>sp|P02817|AMELX_BOVIN Amelogenin, X isoform OS=Bos taurus OX=9913 GN=AMELX PE=1 SV=2	1	hf1_10472_ebo_36_1_261219.ScanId;v=1;d1=26687.26687.5	controllerType=0 controllerNumber=1 scan=26687	56.7091
27161:5	1	S.MP[+15.995]LPPHPGHPGYINFS[+79.966]YEVLTPLKWY[+15.995]QSMIRHPYP.S		P[+16], S[+80], Y[+16]	855.816	5	4275.05	4275.04	0	2.3	17	Non	342.26	342.26	3.81	6.3	1509	>sp|P02817|AMELX_BOVIN Amelogenin, X isoform OS=Bos taurus OX=9913 GN=AMELX PE=1 SV=2	1	hf1_10472_ebo_36_1_261219.ScanId;v=1;d1=20843.20843.5	controllerType=0 controllerNumber=1 scan=20843	46.0785
30264:5	1	S.MP[+15.995]LPPHPGHPGYINFS[+79.966]YEVLTPLKW[+31.990]YQSMIRHPYP.S		P[+16], S[+80], W[+32]	858.813	5	4290.04	4291.03	-1	1.2	17	Non	348.61	348.61	0	6.47	1509	>sp|P02817|AMELX_BOVIN Amelogenin, X isoform OS=Bos taurus OX=9913 GN=AMELX PE=1 SV=2	1	hf1_10472_ebo_36_1_261219.ScanId;v=1;d1=22803.22803.5	controllerType=0 controllerNumber=1 scan=22803	49.622
27001:5	1	S.MP[+15.995]LPPHPGHPGYINFS[+79.966]YEVLTPLKW[+31.990]YQSMIRHPYP.S		P[+16], S[+80], W[+32]	859.015	5	4291.05	4291.03	0	3.5	17	Non	349.55	349.55	0.49	6.08	1509	>sp|P02817|AMELX_BOVIN Amelogenin, X isoform OS=Bos taurus OX=9913 GN=AMELX PE=1 SV=2	1	hf1_10472_ebo_36_1_261219.ScanId;v=1;d1=20742.20742.5	controllerType=0 controllerNumber=1 scan=20742	45.9016
35420:5	1	S.M[+15.995]PLPPHPGHPGYINFS[+79.966]YEVLTPLKWY[+15.995]QSMIRHPYP.S		M[+16], S[+80], Y[+16]	856.013	5	4276.03	4275.04	1	-1.8	17	Non	362.35	362.35	0	6.32	1509	>sp|P02817|AMELX_BOVIN Amelogenin, X isoform OS=Bos taurus OX=9913 GN=AMELX PE=1 SV=2	1	hf1_10472_ebo_36_1_261219.ScanId;v=1;d1=26146.26146.5	controllerType=0 controllerNumber=1 scan=26146	55.7376
34177:5	1	S.M[+15.995]PLPPHPGHPGYINFS[+79.966]YEVLTPLKW[+15.995]YQSMIRHPYP.S		M[+16], S[+80], W[+16]	856.016	5	4276.05	4275.04	1	2.1	17	Non	380.37	380.37	0	7	1509	>sp|P02817|AMELX_BOVIN Amelogenin, X isoform OS=Bos taurus OX=9913 GN=AMELX PE=1 SV=2	1	hf1_10472_ebo_36_1_261219.ScanId;v=1;d1=25358.25358.5	controllerType=0 controllerNumber=1 scan=25358	54.299
30579:5	1	S.MP[+15.995]LPPHPGHPGYINFS[+79.966]YEVLTPLKWY[+31.990]QSMIRHPYP.S		P[+16], S[+80], Y[+32]	859.015	5	4291.05	4291.03	0	2.8	17	Non	384.32	384.32	0	6.99	1509	>sp|P02817|AMELX_BOVIN Amelogenin, X isoform OS=Bos taurus OX=9913 GN=AMELX PE=1 SV=2	1	hf1_10472_ebo_36_1_261219.ScanId;v=1;d1=23004.23004.5	controllerType=0 controllerNumber=1 scan=23004	49.979
31845:6	1	S.M[+15.995]PLPPHPGHPGYINFS[+79.966]YEVLTPLKWYQSM[+15.995]IRHPYP.S		M[+16]*2, S[+80]	713.514	6	4276.05	4275.04	1	1.3	17	Non	393.95	393.95	0	6.82	1509	>sp|P02817|AMELX_BOVIN Amelogenin, X isoform OS=Bos taurus OX=9913 GN=AMELX PE=1 SV=2	1	hf1_10472_ebo_36_1_261219.ScanId;v=1;d1=23841.23841.6	controllerType=0 controllerNumber=1 scan=23841	51.4956
32734:6	1	S.MPLPPHPGHPGYINFS[+79.966]YEVLTPLKWY[+15.995]Q[+0.984]SMIRHPYP.S		Q[+1], S[+80], Y[+16]	710.849	6	4260.06	4260.03	0	6.6	17	Non	406.49	406.49	4.61	7.43	1509	>sp|P02817|AMELX_BOVIN Amelogenin, X isoform OS=Bos taurus OX=9913 GN=AMELX PE=1 SV=2	1	hf1_10472_ebo_36_1_261219.ScanId;v=1;d1=24412.24412.6	controllerType=0 controllerNumber=1 scan=24412	52.5482
33858:4	1	S.M[+15.995]PLPPHPGHPGYINFS[+79.966]YEVLTPLKWYQSM[+15.995]IRHPYP.S		M[+16]*2, S[+80]	1069.52	4	4275.06	4275.04	0	5	17	Non	408.8	408.8	0	7.12	1509	>sp|P02817|AMELX_BOVIN Amelogenin, X isoform OS=Bos taurus OX=9913 GN=AMELX PE=1 SV=2	1	hf1_10472_ebo_36_1_261219.ScanId;v=1;d1=25154.25154.4	controllerType=0 controllerNumber=1 scan=25154	53.9236
30581:4	1	S.M[+15.995]PLPPHPGHPGYINFS[+79.966]YEVLTPLKWYQSM[+31.990]IRHPYP.S		M[+16][+32], S[+80]	1073.52	4	4291.06	4291.03	0	5.4	17	Non	412.72	412.72	2.5	6.84	1509	>sp|P02817|AMELX_BOVIN Amelogenin, X isoform OS=Bos taurus OX=9913 GN=AMELX PE=1 SV=2	1	hf1_10472_ebo_36_1_261219.ScanId;v=1;d1=23006.23006.4	controllerType=0 controllerNumber=1 scan=23006	49.9821
34470:5	1	S.M[+15.995]PLPPHPGHPGYINFS[+79.966]YEVLTP[+15.995]LKWYQSMIRHPYP.S		M[+16], P[+16], S[+80]	855.818	5	4275.06	4275.04	0	5.6	17	Non	421.22	421.22	6.37	7.52	1509	>sp|P02817|AMELX_BOVIN Amelogenin, X isoform OS=Bos taurus OX=9913 GN=AMELX PE=1 SV=2	1	hf1_10472_ebo_36_1_261219.ScanId;v=1;d1=25546.25546.5	controllerType=0 controllerNumber=1 scan=25546	54.6415
30268:4	1	S.M[+15.995]PLPPHPGHPGYINFS[+79.966]YEVLTPLKW[+31.990]YQSMIRHPYP.S		M[+16], S[+80], W[+32]	1073.27	4	4290.04	4291.03	-1	3.2	17	Non	423.51	423.51	3.31	6.7	1509	>sp|P02817|AMELX_BOVIN Amelogenin, X isoform OS=Bos taurus OX=9913 GN=AMELX PE=1 SV=2	1	hf1_10472_ebo_36_1_261219.ScanId;v=1;d1=22806.22806.4	controllerType=0 controllerNumber=1 scan=22806	49.6265
31735:5	1	S.MP[+15.995]LPPHPGHPGYINFS[+79.966]YEVLTPLKW[+31.990]YQSMIRHPYP.S		P[+16], S[+80], W[+32]	859.212	5	4292.03	4291.03	1	-0.9	17	Non	425.54	425.54	0.25	6.95	1509	>sp|P02817|AMELX_BOVIN Amelogenin, X isoform OS=Bos taurus OX=9913 GN=AMELX PE=1 SV=2	1	hf1_10472_ebo_36_1_261219.ScanId;v=1;d1=23767.23767.5	controllerType=0 controllerNumber=1 scan=23767	51.3598
[truncated: 2,465 more rows]

## Sheet: Proteins
Protein Rank	Description	|Log Prob|	Best |Log Prob|	Best score	Total Intensity	# of spectra	# of unique peptides	# of mod peptides	Coverage %	# AA's in protein	Protein DB number
[truncated: 4 more rows]
