# Supplementary material for: A Peptidomics Method for Assessing Sex from Modern and Ancient Bovine Tooth Enamel.
Source: Research Square preprint supplement (doi:10.21203/rs.3.rs-3766361/v1), 2024-01-29
Supplement: Supplementary file 6 [file 6b294754b6cca6f7a4f4375f.xlsx]

## Sheet: Summary
Summary:
	1) Input data file: H:\Proteomics\Projects\Boaretto\INCPM_18273\Raw_data\HF1_EB_18273_84_20032023.raw
	2) Protein database: H:\Proteomics\Projects\Boaretto\INCPM_18273\AMELs Cattle fasta Pau 2.Fasta
	3) Parameter file: D:\Boaretto\HF1_EB_18273_84_20032023.raw_20230417_Amel\objs\params.prf
	4) Date/Time: April 17, 2023 2:17:46 AM IDT
	5) RunTime: 1 hours, 4 minutes, 58 seconds; on 34 cores
Summary Statistics:
	1) Reporting 2 forward and 2 reverse proteins
	2) 1123 unique forward peptides
	3) 3099 spectra matched to forward peptides
	4) Estimated spectrum-level FDR on true proteins is 0.3%
Recorded protein search configuration:
Num	Rule	Value
0	Protein database	H:\Proteomics\Projects\Boaretto\INCPM_18273\AMELs Cattle fasta Pau 2.Fasta
1	Spectrum-level FDR	Auto cut
2	Cleavage residues	KR
3	Digest cutter	C-terminal cutter
4	Peptide termini	Non specific
5	Maximum number of missed cleavages	Any missed cleavages (-1)
6	Precursor tolerance	10.0 ppm
7	Fragment tolerance	frag:qtof_hcd 20.0 ppm
8	Fragment tolerance version	2
9	Charges applied to charge-unassigned spectra:	1,2,3
10	Precursor mass max	7500.0
11	N-glycan search	None
12	O-glycan search	None
13	Off by x isotopes	-2,-1,0,+1,+2
14	Contaminants added	false
15	Decoys added	true
16	%Additional parameters:
17	Disulfide Enable	false
18	Trisulfide Enable	false
19	DSS Crosslink Enable	false
20	Custom Crosslink Enable	false
21	Wildcard Enable	0
22	Combyne cut off score	Auto
23	Protein FDR cutoff	1%
24	Focused DB created	true
25	Export mzIdentML	true
26	Score version	2
27	precursor_assignment_flags	2
28	po_NumberMonosReturn	2
29	Lock mass list	None
30	do_quick_rejects	0
31	%Modification searches:
32	common_modifications_max	2
33	rare_modifications_max	2
34	%Fixed and variable modifications:
35	Oxidation / +15.994915 @ F, H, K, M, P, W, Y | common2
36	Deamidated / +0.984016 @ N, Q, R | common2
37	Acetyl / +42.010565 @ Protein NTerm | rare1
38	Dioxidation / +31.989829 @ F, M, P, W, Y | rare2
39	Gln->pyro-Glu / -17.026549 @ Protein NTerm Q | rare1
40	Glu->pyro-Glu / -18.010565 @ Protein NTerm E | rare1
41	Phospho / +79.966331 @ S | rare1
42	% Custom modification text below
43	%Glycan modifications:
44	% Custom modification text below
45	Show all N-glycopeptides	0
46	%Addition parameters:
47	Product Version	PMI-Byonic-Com:v4.6.1
48	Registered to	david Morgenstern G-INCPM

## Sheet: Spectra
Query #:z	Protein Rank	Peptide < ProteinMetrics Confidential >	Glycans NHFAGNa	Modification Type(s)	Observed m/z	z	Observed (M+H)	Calc. mass (M+H)	Off-by-x error	Mass error (ppm)	Starting position	Cleavage	Score	Delta	Delta Mod	|Log Prob|	# of unique peptides	Protein Name	Protein DB number	Comment	Scan #	Scan Time
08694:2	1	F.SM[+15.995]PLPPHP.G		M[+16]	446.222	2	891.437	891.439	0	-2.1	16	Non	209.04	143.96	127.76	1	1104	>sp|P02817|AMELX_BOVIN Amelogenin, X isoform OS=Bos taurus OX=9913 GN=AMELX PE=1 SV=2	1	hf1_eb_18273_84_20032023.ScanId;v=1;d1=9358.9358.2	controllerType=0 controllerNumber=1 scan=9358	28.3121
08301:2	1	F.SM[+15.995]PLPPHP.G		M[+16]	446.222	2	891.438	891.439	0	-2	16	Non	227.07	127.8	127.8	1.45	1104	>sp|P02817|AMELX_BOVIN Amelogenin, X isoform OS=Bos taurus OX=9913 GN=AMELX PE=1 SV=2	1	hf1_eb_18273_84_20032023.ScanId;v=1;d1=9049.9049.2	controllerType=0 controllerNumber=1 scan=9049	27.6847
07004:2	1	F.SM[+15.995]PLPPHPG.H		M[+16]	474.733	2	948.459	948.461	0	-2	16	Non	232.44	232.44	169.38	2.74	1104	>sp|P02817|AMELX_BOVIN Amelogenin, X isoform OS=Bos taurus OX=9913 GN=AMELX PE=1 SV=2	1	hf1_eb_18273_84_20032023.ScanId;v=1;d1=8026.8026.2	controllerType=0 controllerNumber=1 scan=8026	25.6744
07212:2	1	F.SM[+15.995]PLPPHPG.H		M[+16]	474.733	2	948.46	948.461	0	-1.4	16	Non	356.46	356.46	188.13	4.73	1104	>sp|P02817|AMELX_BOVIN Amelogenin, X isoform OS=Bos taurus OX=9913 GN=AMELX PE=1 SV=2	1	hf1_eb_18273_84_20032023.ScanId;v=1;d1=8197.8197.2	controllerType=0 controllerNumber=1 scan=8197	26.021
05624:3	1	F.SM[+15.995]PLPPHPGHPG.Y		M[+16]	413.868	3	1239.59	1239.59	0	-2.6	16	Non	259.22	259.22	41.12	3.97	1104	>sp|P02817|AMELX_BOVIN Amelogenin, X isoform OS=Bos taurus OX=9913 GN=AMELX PE=1 SV=2	1	hf1_eb_18273_84_20032023.ScanId;v=1;d1=6893.6893.3	controllerType=0 controllerNumber=1 scan=6893	23.3704
19260:3	1	F.SM[+15.995]PLPPHPGHPGYIN[+0.984]F.S		M[+16], N[+1]	593.283	3	1777.83	1777.84	0	-1.6	16	Non	266.38	258.55	44.9	4.15	1104	>sp|P02817|AMELX_BOVIN Amelogenin, X isoform OS=Bos taurus OX=9913 GN=AMELX PE=1 SV=2	1	hf1_eb_18273_84_20032023.ScanId;v=1;d1=17140.17140.3	controllerType=0 controllerNumber=1 scan=17140	42.5115
18929:3	1	F.SM[+15.995]PLPPHPGHPGYIN[+0.984]F.S		M[+16], N[+1]	593.283	3	1777.83	1777.84	0	-2.1	16	Non	312.81	242.43	85.5	4.83	1104	>sp|P02817|AMELX_BOVIN Amelogenin, X isoform OS=Bos taurus OX=9913 GN=AMELX PE=1 SV=2	1	hf1_eb_18273_84_20032023.ScanId;v=1;d1=16904.16904.3	controllerType=0 controllerNumber=1 scan=16904	42.0834
28865:3	1	F.SM[+15.995]PLPPHPGHPGYIN[+0.984]FS[+79.966]YEVLTPLK.W		M[+16], N[+1], S[+80]	963.463	3	2888.38	2888.37	0	0.8	16	NRagged	131.41	131.41	70.52	3.15	1104	>sp|P02817|AMELX_BOVIN Amelogenin, X isoform OS=Bos taurus OX=9913 GN=AMELX PE=1 SV=2	1	hf1_eb_18273_84_20032023.ScanId;v=1;d1=23932.23932.3	controllerType=0 controllerNumber=1 scan=23932	54.6088
28777:3	1	F.SM[+15.995]PLPPHPGHPGYIN[+0.984]FS[+79.966]YEVLTPLK.W		M[+16], N[+1], S[+80]	963.461	3	2888.37	2888.37	0	-1.4	16	NRagged	159.73	159.73	87.58	3.48	1104	>sp|P02817|AMELX_BOVIN Amelogenin, X isoform OS=Bos taurus OX=9913 GN=AMELX PE=1 SV=2	1	hf1_eb_18273_84_20032023.ScanId;v=1;d1=23865.23865.3	controllerType=0 controllerNumber=1 scan=23865	54.4896
05848:1	1	S.M[+31.990]PLPPH.P		M[+32]	723.348	1	723.348	723.349	0	-1.6	17	Non	166.4	166.4	0	1.49	1104	>sp|P02817|AMELX_BOVIN Amelogenin, X isoform OS=Bos taurus OX=9913 GN=AMELX PE=1 SV=2	1	hf1_eb_18273_84_20032023.ScanId;v=1;d1=7083.7083.2	controllerType=0 controllerNumber=1 scan=7083	23.7479
05829:1	1	S.M[+15.995]PLPPH.P		M[+16]	707.354	1	707.354	707.355	0	-0.5	17	Non	244.82	244.82	41.38	4.03	1104	>sp|P02817|AMELX_BOVIN Amelogenin, X isoform OS=Bos taurus OX=9913 GN=AMELX PE=1 SV=2	1	hf1_eb_18273_84_20032023.ScanId;v=1;d1=7069.7069.2	controllerType=0 controllerNumber=1 scan=7069	23.7212
13839:2	1	S.MPLPPHP.G			394.709	2	788.412	788.412	0	-0.9	17	Non	365.26	184.33	184.33	3.69	1104	>sp|P02817|AMELX_BOVIN Amelogenin, X isoform OS=Bos taurus OX=9913 GN=AMELX PE=1 SV=2	1	hf1_eb_18273_84_20032023.ScanId;v=1;d1=13176.13176.4	controllerType=0 controllerNumber=1 scan=13176	35.3931
10851:2	1	S.M[+31.990]PLPPHP.G		M[+32]	410.705	2	820.402	820.402	0	-0.1	17	Non	249.12	219.14	12.16	3.07	1104	>sp|P02817|AMELX_BOVIN Amelogenin, X isoform OS=Bos taurus OX=9913 GN=AMELX PE=1 SV=2	1	hf1_eb_18273_84_20032023.ScanId;v=1;d1=10989.10989.2	controllerType=0 controllerNumber=1 scan=10989	31.3766
12153:2	1	S.M[+15.995]PLPPHP.G		M[+16]	402.707	2	804.408	804.407	0	0.2	17	Non	260.51	180.67	61.47	2.72	1104	>sp|P02817|AMELX_BOVIN Amelogenin, X isoform OS=Bos taurus OX=9913 GN=AMELX PE=1 SV=2	1	hf1_eb_18273_84_20032023.ScanId;v=1;d1=11959.11959.3	controllerType=0 controllerNumber=1 scan=11959	33.1822
06514:2	1	S.M[+15.995]PLPPHP.G		M[+16]	402.706	2	804.406	804.407	0	-2.1	17	Non	278.02	78.99	43.52	2.25	1104	>sp|P02817|AMELX_BOVIN Amelogenin, X isoform OS=Bos taurus OX=9913 GN=AMELX PE=1 SV=2	1	hf1_eb_18273_84_20032023.ScanId;v=1;d1=7620.7620.2	controllerType=0 controllerNumber=1 scan=7620	24.8025
09842:2	1	S.M[+31.990]PLPPHP.G		M[+32]	410.704	2	820.401	820.402	0	-0.9	17	Non	297.3	242.66	15.61	4.37	1104	>sp|P02817|AMELX_BOVIN Amelogenin, X isoform OS=Bos taurus OX=9913 GN=AMELX PE=1 SV=2	1	hf1_eb_18273_84_20032023.ScanId;v=1;d1=10236.10236.2	controllerType=0 controllerNumber=1 scan=10236	29.9863
09889:2	1	S.M[+15.995]PLPPHP.G		M[+16]	402.707	2	804.406	804.407	0	-1.1	17	Non	298.31	165.48	75.36	3.94	1104	>sp|P02817|AMELX_BOVIN Amelogenin, X isoform OS=Bos taurus OX=9913 GN=AMELX PE=1 SV=2	1	hf1_eb_18273_84_20032023.ScanId;v=1;d1=10271.10271.2	controllerType=0 controllerNumber=1 scan=10271	30.0531
06495:2	1	S.M[+15.995]PLPPHP.G		M[+16]	402.706	2	804.405	804.407	0	-2.4	17	Non	300.39	58.99	58.99	2.47	1104	>sp|P02817|AMELX_BOVIN Amelogenin, X isoform OS=Bos taurus OX=9913 GN=AMELX PE=1 SV=2	1	hf1_eb_18273_84_20032023.ScanId;v=1;d1=7601.7601.2	controllerType=0 controllerNumber=1 scan=7601	24.7583
09585:2	1	S.M[+31.990]PLPPHP.G		M[+32]	410.704	2	820.401	820.402	0	-1	17	Non	302.63	232.53	44.57	4.33	1104	>sp|P02817|AMELX_BOVIN Amelogenin, X isoform OS=Bos taurus OX=9913 GN=AMELX PE=1 SV=2	1	hf1_eb_18273_84_20032023.ScanId;v=1;d1=10039.10039.2	controllerType=0 controllerNumber=1 scan=10039	29.6144
09137:2	1	S.M[+31.990]PLPPHP.G		M[+32]	410.705	2	820.402	820.402	0	-0.3	17	Non	308.16	232.2	19.17	4	1104	>sp|P02817|AMELX_BOVIN Amelogenin, X isoform OS=Bos taurus OX=9913 GN=AMELX PE=1 SV=2	1	hf1_eb_18273_84_20032023.ScanId;v=1;d1=9696.9696.2	controllerType=0 controllerNumber=1 scan=9696	28.9722
10337:2	1	S.M[+15.995]PLPPHP.G		M[+16]	402.707	2	804.408	804.407	0	0.3	17	Non	349.58	187.16	73.78	3.96	1104	>sp|P02817|AMELX_BOVIN Amelogenin, X isoform OS=Bos taurus OX=9913 GN=AMELX PE=1 SV=2	1	hf1_eb_18273_84_20032023.ScanId;v=1;d1=10612.10612.2	controllerType=0 controllerNumber=1 scan=10612	30.6938
10069:2	1	S.M[+31.990]PLPPHP.G		M[+32]	410.704	2	820.401	820.402	0	-1.2	17	Non	378.96	297.09	32.46	4.59	1104	>sp|P02817|AMELX_BOVIN Amelogenin, X isoform OS=Bos taurus OX=9913 GN=AMELX PE=1 SV=2	1	hf1_eb_18273_84_20032023.ScanId;v=1;d1=10409.10409.2	controllerType=0 controllerNumber=1 scan=10409	30.3254
07592:2	1	S.M[+15.995]PLPPHP.G		M[+16]	402.707	2	804.407	804.407	0	0	17	Non	385.26	207.19	79.86	4.81	1104	>sp|P02817|AMELX_BOVIN Amelogenin, X isoform OS=Bos taurus OX=9913 GN=AMELX PE=1 SV=2	1	hf1_eb_18273_84_20032023.ScanId;v=1;d1=8504.8504.2	controllerType=0 controllerNumber=1 scan=8504	26.6439
09639:2	1	S.M[+15.995]PLPPHP.G		M[+16]	402.707	2	804.406	804.407	0	-1.4	17	Non	398.28	214.1	86.86	4.41	1104	>sp|P02817|AMELX_BOVIN Amelogenin, X isoform OS=Bos taurus OX=9913 GN=AMELX PE=1 SV=2	1	hf1_eb_18273_84_20032023.ScanId;v=1;d1=10083.10083.2	controllerType=0 controllerNumber=1 scan=10083	29.7047
10586:2	1	S.M[+31.990]PLPPHP.G		M[+32]	410.705	2	820.402	820.402	0	-0.2	17	Non	401.42	256.43	47.54	4.57	1104	>sp|P02817|AMELX_BOVIN Amelogenin, X isoform OS=Bos taurus OX=9913 GN=AMELX PE=1 SV=2	1	hf1_eb_18273_84_20032023.ScanId;v=1;d1=10794.10794.2	controllerType=0 controllerNumber=1 scan=10794	31.0302
07375:2	1	S.M[+15.995]PLPPHP.G		M[+16]	402.707	2	804.406	804.407	0	-1.7	17	Non	402.69	191.31	81.76	3.98	1104	>sp|P02817|AMELX_BOVIN Amelogenin, X isoform OS=Bos taurus OX=9913 GN=AMELX PE=1 SV=2	1	hf1_eb_18273_84_20032023.ScanId;v=1;d1=8330.8330.2	controllerType=0 controllerNumber=1 scan=8330	26.2946
10326:2	1	S.M[+31.990]PLPPHP.G		M[+32]	410.705	2	820.402	820.402	0	-0.3	17	Non	423.3	288.93	46.99	4.71	1104	>sp|P02817|AMELX_BOVIN Amelogenin, X isoform OS=Bos taurus OX=9913 GN=AMELX PE=1 SV=2	1	hf1_eb_18273_84_20032023.ScanId;v=1;d1=10604.10604.2	controllerType=0 controllerNumber=1 scan=10604	30.68
07840:2	1	S.M[+15.995]PLPPHP.G		M[+16]	402.707	2	804.408	804.407	0	0.2	17	Non	423.69	280.85	91.88	5	1104	>sp|P02817|AMELX_BOVIN Amelogenin, X isoform OS=Bos taurus OX=9913 GN=AMELX PE=1 SV=2	1	hf1_eb_18273_84_20032023.ScanId;v=1;d1=8690.8690.2	controllerType=0 controllerNumber=1 scan=8690	26.9942
08293:2	1	S.M[+15.995]PLPPHP.G		M[+16]	402.707	2	804.407	804.407	0	-0.4	17	Non	424.44	291.83	94.34	5	1104	>sp|P02817|AMELX_BOVIN Amelogenin, X isoform OS=Bos taurus OX=9913 GN=AMELX PE=1 SV=2	1	hf1_eb_18273_84_20032023.ScanId;v=1;d1=9043.9043.2	controllerType=0 controllerNumber=1 scan=9043	27.6736
08058:2	1	S.M[+15.995]PLPPHP.G		M[+16]	402.707	2	804.408	804.407	0	0.3	17	Non	434.46	287.17	86.76	5	1104	>sp|P02817|AMELX_BOVIN Amelogenin, X isoform OS=Bos taurus OX=9913 GN=AMELX PE=1 SV=2	1	hf1_eb_18273_84_20032023.ScanId;v=1;d1=8867.8867.2	controllerType=0 controllerNumber=1 scan=8867	27.333
08512:2	1	S.M[+15.995]PLPPHP.G		M[+16]	402.707	2	804.407	804.407	0	-0.2	17	Non	444.54	261.61	81.05	4.89	1104	>sp|P02817|AMELX_BOVIN Amelogenin, X isoform OS=Bos taurus OX=9913 GN=AMELX PE=1 SV=2	1	hf1_eb_18273_84_20032023.ScanId;v=1;d1=9213.9213.2	controllerType=0 controllerNumber=1 scan=9213	28.0157
08720:2	1	S.M[+15.995]PLPPHP.G		M[+16]	402.707	2	804.407	804.407	0	-0.8	17	Non	448.07	280.09	82.38	4.66	1104	>sp|P02817|AMELX_BOVIN Amelogenin, X isoform OS=Bos taurus OX=9913 GN=AMELX PE=1 SV=2	1	hf1_eb_18273_84_20032023.ScanId;v=1;d1=9381.9381.2	controllerType=0 controllerNumber=1 scan=9381	28.3568
06962:2	1	S.M[+15.995]PLPP[+15.995]HP.G		M[+16], P[+16]	410.704	2	820.4	820.402	0	-2.1	17	Non	252.21	143.81	2.39	2.17	1104	>sp|P02817|AMELX_BOVIN Amelogenin, X isoform OS=Bos taurus OX=9913 GN=AMELX PE=1 SV=2	1	hf1_eb_18273_84_20032023.ScanId;v=1;d1=7994.7994.2	controllerType=0 controllerNumber=1 scan=7994	25.6108
11553:2	1	S.MPLPPHPG.H			423.22	2	845.432	845.434	0	-1.7	17	Non	352.15	352.15	352.15	4.41	1104	>sp|P02817|AMELX_BOVIN Amelogenin, X isoform OS=Bos taurus OX=9913 GN=AMELX PE=1 SV=2	1	hf1_eb_18273_84_20032023.ScanId;v=1;d1=11516.11516.2	controllerType=0 controllerNumber=1 scan=11516	32.3657
13101:2	1	S.MPLPPHPG.H			423.22	2	845.433	845.434	0	-1.1	17	Non	352.15	335.86	335.86	4.62	1104	>sp|P02817|AMELX_BOVIN Amelogenin, X isoform OS=Bos taurus OX=9913 GN=AMELX PE=1 SV=2	1	hf1_eb_18273_84_20032023.ScanId;v=1;d1=12637.12637.2	controllerType=0 controllerNumber=1 scan=12637	34.4138
12836:2	1	S.MPLPPHPG.H			423.22	2	845.433	845.434	0	-0.6	17	Non	394.09	359.41	359.41	4.79	1104	>sp|P02817|AMELX_BOVIN Amelogenin, X isoform OS=Bos taurus OX=9913 GN=AMELX PE=1 SV=2	1	hf1_eb_18273_84_20032023.ScanId;v=1;d1=12446.12446.2	controllerType=0 controllerNumber=1 scan=12446	34.0748
11807:2	1	S.MPLPPHPG.H			423.22	2	845.433	845.434	0	-1.2	17	Non	403.83	403.83	403.83	5.86	1104	>sp|P02817|AMELX_BOVIN Amelogenin, X isoform OS=Bos taurus OX=9913 GN=AMELX PE=1 SV=2	1	hf1_eb_18273_84_20032023.ScanId;v=1;d1=11703.11703.2	controllerType=0 controllerNumber=1 scan=11703	32.7151
12061:2	1	S.MPLPPHPG.H			423.22	2	845.433	845.434	0	-0.9	17	Non	414.73	414.73	414.73	5.64	1104	>sp|P02817|AMELX_BOVIN Amelogenin, X isoform OS=Bos taurus OX=9913 GN=AMELX PE=1 SV=2	1	hf1_eb_18273_84_20032023.ScanId;v=1;d1=11889.11889.2	controllerType=0 controllerNumber=1 scan=11889	33.0554
12304:2	1	S.MPLPPHPG.H			423.221	2	845.434	845.434	0	0.4	17	Non	416.34	416.34	416.34	5.3	1104	>sp|P02817|AMELX_BOVIN Amelogenin, X isoform OS=Bos taurus OX=9913 GN=AMELX PE=1 SV=2	1	hf1_eb_18273_84_20032023.ScanId;v=1;d1=12070.12070.2	controllerType=0 controllerNumber=1 scan=12070	33.3919
12565:2	1	S.MPLPPHPG.H			423.221	2	845.434	845.434	0	0.1	17	Non	420.14	388.64	388.64	5.64	1104	>sp|P02817|AMELX_BOVIN Amelogenin, X isoform OS=Bos taurus OX=9913 GN=AMELX PE=1 SV=2	1	hf1_eb_18273_84_20032023.ScanId;v=1;d1=12254.12254.2	controllerType=0 controllerNumber=1 scan=12254	33.7305
37453:2	1	S.M[+15.995]PLPPHPG.H		M[+16]	431.219	2	861.431	861.429	0	2.7	17	Non	197.95	197.95	26.63	1.47	1104	>sp|P02817|AMELX_BOVIN Amelogenin, X isoform OS=Bos taurus OX=9913 GN=AMELX PE=1 SV=2	1	hf1_eb_18273_84_20032023.ScanId;v=1;d1=31232.31232.2	controllerType=0 controllerNumber=1 scan=31232	73.2166
37702:2	1	S.M[+15.995]PLPPHPG.H		M[+16]	431.218	2	861.429	861.429	0	-0.1	17	Non	234.41	234.41	103.83	3.08	1104	>sp|P02817|AMELX_BOVIN Amelogenin, X isoform OS=Bos taurus OX=9913 GN=AMELX PE=1 SV=2	1	hf1_eb_18273_84_20032023.ScanId;v=1;d1=31497.31497.2	controllerType=0 controllerNumber=1 scan=31497	74.2335
10760:2	1	S.M[+15.995]PLPPHPG.H		M[+16]	431.218	2	861.428	861.429	0	-0.9	17	Non	240.49	176.12	55.06	2.72	1104	>sp|P02817|AMELX_BOVIN Amelogenin, X isoform OS=Bos taurus OX=9913 GN=AMELX PE=1 SV=2	1	hf1_eb_18273_84_20032023.ScanId;v=1;d1=10924.10924.2	controllerType=0 controllerNumber=1 scan=10924	31.2627
37639:2	1	S.M[+15.995]PLPPHPG.H		M[+16]	431.218	2	861.429	861.429	0	0.3	17	Non	309.02	309.02	69.9	4.68	1104	>sp|P02817|AMELX_BOVIN Amelogenin, X isoform OS=Bos taurus OX=9913 GN=AMELX PE=1 SV=2	1	hf1_eb_18273_84_20032023.ScanId;v=1;d1=31419.31419.2	controllerType=0 controllerNumber=1 scan=31419	73.8966
09295:2	1	S.MP[+31.990]LPPHPG.H		P[+32]	439.214	2	877.422	877.424	0	-2.3	17	Non	313.26	313.26	0	4.3	1104	>sp|P02817|AMELX_BOVIN Amelogenin, X isoform OS=Bos taurus OX=9913 GN=AMELX PE=1 SV=2	1	hf1_eb_18273_84_20032023.ScanId;v=1;d1=9825.9825.3	controllerType=0 controllerNumber=1 scan=9825	29.2239
37557:2	1	S.M[+15.995]PLPPHPG.H		M[+16]	431.218	2	861.43	861.429	0	1	17	Non	319.43	319.43	73.38	5.04	1104	>sp|P02817|AMELX_BOVIN Amelogenin, X isoform OS=Bos taurus OX=9913 GN=AMELX PE=1 SV=2	1	hf1_eb_18273_84_20032023.ScanId;v=1;d1=31333.31333.2	controllerType=0 controllerNumber=1 scan=31333	73.5549
09765:2	1	S.M[+15.995]PLPPHPG.H		M[+16]	431.217	2	861.427	861.429	0	-1.7	17	Non	333.18	270.23	78.53	4.18	1104	>sp|P02817|AMELX_BOVIN Amelogenin, X isoform OS=Bos taurus OX=9913 GN=AMELX PE=1 SV=2	1	hf1_eb_18273_84_20032023.ScanId;v=1;d1=10179.10179.2	controllerType=0 controllerNumber=1 scan=10179	29.8794
10014:2	1	S.M[+15.995]PLPPHPG.H		M[+16]	431.217	2	861.428	861.429	0	-1.3	17	Non	336.39	263.83	77.48	4.4	1104	>sp|P02817|AMELX_BOVIN Amelogenin, X isoform OS=Bos taurus OX=9913 GN=AMELX PE=1 SV=2	1	hf1_eb_18273_84_20032023.ScanId;v=1;d1=10363.10363.2	controllerType=0 controllerNumber=1 scan=10363	30.2323
09037:2	1	S.M[+15.995]PLPPHPG.H		M[+16]	431.218	2	861.429	861.429	0	0	17	Non	351.5	274.17	77.55	4.4	1104	>sp|P02817|AMELX_BOVIN Amelogenin, X isoform OS=Bos taurus OX=9913 GN=AMELX PE=1 SV=2	1	hf1_eb_18273_84_20032023.ScanId;v=1;d1=9619.9619.2	controllerType=0 controllerNumber=1 scan=9619	28.8186
09266:2	1	S.M[+15.995]PLPPHPG.H		M[+16]	431.218	2	861.429	861.429	0	0.1	17	Non	351.78	272.73	80.14	4.5	1104	>sp|P02817|AMELX_BOVIN Amelogenin, X isoform OS=Bos taurus OX=9913 GN=AMELX PE=1 SV=2	1	hf1_eb_18273_84_20032023.ScanId;v=1;d1=9800.9800.2	controllerType=0 controllerNumber=1 scan=9800	29.1771
09073:2	1	S.M[+31.990]PLPPHPG.H		M[+32]	439.214	2	877.421	877.424	0	-2.7	17	Non	373.44	370.31	41.19	5.35	1104	>sp|P02817|AMELX_BOVIN Amelogenin, X isoform OS=Bos taurus OX=9913 GN=AMELX PE=1 SV=2	1	hf1_eb_18273_84_20032023.ScanId;v=1;d1=9647.9647.2	controllerType=0 controllerNumber=1 scan=9647	28.8727
08775:2	1	S.M[+15.995]PLPPHPG.H		M[+16]	431.218	2	861.428	861.429	0	-0.4	17	Non	377.65	290.2	76.56	4.7	1104	>sp|P02817|AMELX_BOVIN Amelogenin, X isoform OS=Bos taurus OX=9913 GN=AMELX PE=1 SV=2	1	hf1_eb_18273_84_20032023.ScanId;v=1;d1=9422.9422.2	controllerType=0 controllerNumber=1 scan=9422	28.4306
09512:2	1	S.M[+15.995]PLPPHPG.H		M[+16]	431.218	2	861.428	861.429	0	-0.8	17	Non	380.03	286.9	86.47	4.7	1104	>sp|P02817|AMELX_BOVIN Amelogenin, X isoform OS=Bos taurus OX=9913 GN=AMELX PE=1 SV=2	1	hf1_eb_18273_84_20032023.ScanId;v=1;d1=9986.9986.2	controllerType=0 controllerNumber=1 scan=9986	29.5227
08840:2	1	S.M[+31.990]PLPPHPG.H		M[+32]	439.214	2	877.422	877.424	0	-2.3	17	Non	397.11	360.88	46.6	5.63	1104	>sp|P02817|AMELX_BOVIN Amelogenin, X isoform OS=Bos taurus OX=9913 GN=AMELX PE=1 SV=2	1	hf1_eb_18273_84_20032023.ScanId;v=1;d1=9473.9473.2	controllerType=0 controllerNumber=1 scan=9473	28.5313
08326:2	1	S.M[+15.995]PLPPHPG.H		M[+16]	431.218	2	861.428	861.429	0	-0.8	17	Non	409.14	359.67	75.94	5.08	1104	>sp|P02817|AMELX_BOVIN Amelogenin, X isoform OS=Bos taurus OX=9913 GN=AMELX PE=1 SV=2	1	hf1_eb_18273_84_20032023.ScanId;v=1;d1=9068.9068.2	controllerType=0 controllerNumber=1 scan=9068	27.723
07636:2	1	S.M[+15.995]PLPPHPG.H		M[+16]	431.218	2	861.429	861.429	0	0.1	17	Non	411.51	374.97	72.96	6.33	1104	>sp|P02817|AMELX_BOVIN Amelogenin, X isoform OS=Bos taurus OX=9913 GN=AMELX PE=1 SV=2	1	hf1_eb_18273_84_20032023.ScanId;v=1;d1=8534.8534.2	controllerType=0 controllerNumber=1 scan=8534	26.6983
06594:2	1	S.M[+15.995]PLPPHPG.H		M[+16]	431.217	2	861.427	861.429	0	-1.7	17	Non	412.74	393.58	99.66	5.64	1104	>sp|P02817|AMELX_BOVIN Amelogenin, X isoform OS=Bos taurus OX=9913 GN=AMELX PE=1 SV=2	1	hf1_eb_18273_84_20032023.ScanId;v=1;d1=7696.7696.2	controllerType=0 controllerNumber=1 scan=7696	25.0002
08542:2	1	S.M[+15.995]PLPPHPG.H		M[+16]	431.218	2	861.428	861.429	0	-1	17	Non	414.43	336	79.26	4.86	1104	>sp|P02817|AMELX_BOVIN Amelogenin, X isoform OS=Bos taurus OX=9913 GN=AMELX PE=1 SV=2	1	hf1_eb_18273_84_20032023.ScanId;v=1;d1=9235.9235.2	controllerType=0 controllerNumber=1 scan=9235	28.0587
06796:2	1	S.M[+15.995]PLPPHPG.H		M[+16]	431.218	2	861.428	861.429	0	-0.5	17	Non	415.21	381.66	83.49	6.33	1104	>sp|P02817|AMELX_BOVIN Amelogenin, X isoform OS=Bos taurus OX=9913 GN=AMELX PE=1 SV=2	1	hf1_eb_18273_84_20032023.ScanId;v=1;d1=7859.7859.2	controllerType=0 controllerNumber=1 scan=7859	25.3377
07416:2	1	S.M[+15.995]PLPPHPG.H		M[+16]	431.218	2	861.428	861.429	0	-0.5	17	Non	430	397.41	82.51	6.33	1104	>sp|P02817|AMELX_BOVIN Amelogenin, X isoform OS=Bos taurus OX=9913 GN=AMELX PE=1 SV=2	1	hf1_eb_18273_84_20032023.ScanId;v=1;d1=8362.8362.2	controllerType=0 controllerNumber=1 scan=8362	26.3598
07211:2	1	S.M[+15.995]PLPPHPG.H		M[+16]	431.218	2	861.429	861.429	0	-0.2	17	Non	439.42	396.97	84.01	6.33	1104	>sp|P02817|AMELX_BOVIN Amelogenin, X isoform OS=Bos taurus OX=9913 GN=AMELX PE=1 SV=2	1	hf1_eb_18273_84_20032023.ScanId;v=1;d1=8196.8196.2	controllerType=0 controllerNumber=1 scan=8196	26.0202
08094:2	1	S.M[+15.995]PLPPHPG.H		M[+16]	431.218	2	861.428	861.429	0	-0.3	17	Non	441.81	383.09	98.36	5.89	1104	>sp|P02817|AMELX_BOVIN Amelogenin, X isoform OS=Bos taurus OX=9913 GN=AMELX PE=1 SV=2	1	hf1_eb_18273_84_20032023.ScanId;v=1;d1=8892.8892.2	controllerType=0 controllerNumber=1 scan=8892	27.3766
07010:2	1	S.M[+15.995]PLPPHPG.H		M[+16]	431.218	2	861.429	861.429	0	-0.2	17	Non	444.04	405.44	98.64	5.89	1104	>sp|P02817|AMELX_BOVIN Amelogenin, X isoform OS=Bos taurus OX=9913 GN=AMELX PE=1 SV=2	1	hf1_eb_18273_84_20032023.ScanId;v=1;d1=8031.8031.2	controllerType=0 controllerNumber=1 scan=8031	25.6846
07870:2	1	S.M[+15.995]PLPPHPG.H		M[+16]	431.218	2	861.429	861.429	0	0.1	17	Non	451.21	419.81	96.69	6.36	1104	>sp|P02817|AMELX_BOVIN Amelogenin, X isoform OS=Bos taurus OX=9913 GN=AMELX PE=1 SV=2	1	hf1_eb_18273_84_20032023.ScanId;v=1;d1=8714.8714.2	controllerType=0 controllerNumber=1 scan=8714	27.0384
10377:1	1	S.M[+15.995]PLPP[+31.990]HPG.H		M[+16], P[+32]	893.418	1	893.418	893.419	0	-0.5	17	Non	160.84	160.84	27.77	1.4	1104	>sp|P02817|AMELX_BOVIN Amelogenin, X isoform OS=Bos taurus OX=9913 GN=AMELX PE=1 SV=2	1	hf1_eb_18273_84_20032023.ScanId;v=1;d1=10644.10644.3	controllerType=0 controllerNumber=1 scan=10644	30.7524
06981:2	1	S.M[+15.995]P[+15.995]LPPHPG.H		M[+16], P[+16]	439.214	2	877.421	877.424	0	-2.8	17	Non	247.85	135.31	14.45	1.34	1104	>sp|P02817|AMELX_BOVIN Amelogenin, X isoform OS=Bos taurus OX=9913 GN=AMELX PE=1 SV=2	1	hf1_eb_18273_84_20032023.ScanId;v=1;d1=8009.8009.2	controllerType=0 controllerNumber=1 scan=8009	25.6421
04734:2	1	S.M[+15.995]PLP[+15.995]PHPG.H		M[+16], P[+16]	439.215	2	877.423	877.424	0	-1.2	17	Non	252.08	184.27	15.53	3.27	1104	>sp|P02817|AMELX_BOVIN Amelogenin, X isoform OS=Bos taurus OX=9913 GN=AMELX PE=1 SV=2	1	hf1_eb_18273_84_20032023.ScanId;v=1;d1=6131.6131.2	controllerType=0 controllerNumber=1 scan=6131	21.7006
06767:2	1	S.M[+15.995]PLPP[+15.995]HPG.H		M[+16], P[+16]	439.215	2	877.422	877.424	0	-2	17	Non	262.52	144.02	7.09	2.17	1104	>sp|P02817|AMELX_BOVIN Amelogenin, X isoform OS=Bos taurus OX=9913 GN=AMELX PE=1 SV=2	1	hf1_eb_18273_84_20032023.ScanId;v=1;d1=7834.7834.2	controllerType=0 controllerNumber=1 scan=7834	25.284
05927:2	1	S.M[+15.995]PLPP[+15.995]HPG.H		M[+16], P[+16]	439.215	2	877.423	877.424	0	-1.1	17	Non	297.41	145.46	0.44	2.99	1104	>sp|P02817|AMELX_BOVIN Amelogenin, X isoform OS=Bos taurus OX=9913 GN=AMELX PE=1 SV=2	1	hf1_eb_18273_84_20032023.ScanId;v=1;d1=7146.7146.2	controllerType=0 controllerNumber=1 scan=7146	23.8587
05107:2	1	S.M[+15.995]PLPPH[+15.995]PG.H		H[+16], M[+16]	439.215	2	877.423	877.424	0	-0.9	17	Non	310.35	174.3	1.42	3.03	1104	>sp|P02817|AMELX_BOVIN Amelogenin, X isoform OS=Bos taurus OX=9913 GN=AMELX PE=1 SV=2	1	hf1_eb_18273_84_20032023.ScanId;v=1;d1=6450.6450.2	controllerType=0 controllerNumber=1 scan=6450	22.3868
04932:2	1	S.M[+15.995]PLP[+15.995]PHPG.H		M[+16], P[+16]	439.215	2	877.422	877.424	0	-1.6	17	Non	316.93	224.28	9.09	4.12	1104	>sp|P02817|AMELX_BOVIN Amelogenin, X isoform OS=Bos taurus OX=9913 GN=AMELX PE=1 SV=2	1	hf1_eb_18273_84_20032023.ScanId;v=1;d1=6298.6298.2	controllerType=0 controllerNumber=1 scan=6298	22.0419
06539:2	1	S.M[+15.995]PLPP[+15.995]HPG.H		M[+16], P[+16]	439.214	2	877.421	877.424	0	-2.7	17	Non	347.59	186.5	11.56	3.43	1104	>sp|P02817|AMELX_BOVIN Amelogenin, X isoform OS=Bos taurus OX=9913 GN=AMELX PE=1 SV=2	1	hf1_eb_18273_84_20032023.ScanId;v=1;d1=7641.7641.2	controllerType=0 controllerNumber=1 scan=7641	24.8462
05867:2	1	S.M[+31.990]PLPPHPGH.P		M[+32]	507.745	2	1014.48	1014.48	0	0.5	17	Non	193.57	193.57	0	1.74	1104	>sp|P02817|AMELX_BOVIN Amelogenin, X isoform OS=Bos taurus OX=9913 GN=AMELX PE=1 SV=2	1	hf1_eb_18273_84_20032023.ScanId;v=1;d1=7098.7098.2	controllerType=0 controllerNumber=1 scan=7098	23.7712
06231:2	1	S.M[+15.995]PLPPHPGH.P		M[+16]	499.747	2	998.486	998.488	0	-1.2	17	Non	206.15	175.66	29.45	1.39	1104	>sp|P02817|AMELX_BOVIN Amelogenin, X isoform OS=Bos taurus OX=9913 GN=AMELX PE=1 SV=2	1	hf1_eb_18273_84_20032023.ScanId;v=1;d1=7394.7394.2	controllerType=0 controllerNumber=1 scan=7394	24.3571
05854:2	1	S.M[+31.990]PLPPHPGH.P		M[+32]	507.746	2	1014.48	1014.48	0	2.3	17	Non	236.05	236.05	0	2.63	1104	>sp|P02817|AMELX_BOVIN Amelogenin, X isoform OS=Bos taurus OX=9913 GN=AMELX PE=1 SV=2	1	hf1_eb_18273_84_20032023.ScanId;v=1;d1=7088.7088.2	controllerType=0 controllerNumber=1 scan=7088	23.7543
03731:2	1	S.M[+15.995]PLPPHPGH.P		M[+16]	499.747	2	998.486	998.488	0	-1.6	17	Non	271.99	235.64	69.12	3.76	1104	>sp|P02817|AMELX_BOVIN Amelogenin, X isoform OS=Bos taurus OX=9913 GN=AMELX PE=1 SV=2	1	hf1_eb_18273_84_20032023.ScanId;v=1;d1=5290.5290.2	controllerType=0 controllerNumber=1 scan=5290	19.8542
06137:2	1	S.M[+31.990]PLPPHPGH.P		M[+32]	507.745	2	1014.48	1014.48	0	-0.2	17	Non	321.78	286.42	56.08	4.86	1104	>sp|P02817|AMELX_BOVIN Amelogenin, X isoform OS=Bos taurus OX=9913 GN=AMELX PE=1 SV=2	1	hf1_eb_18273_84_20032023.ScanId;v=1;d1=7312.7312.2	controllerType=0 controllerNumber=1 scan=7312	24.1852
05313:2	1	S.M[+15.995]PLPPHPGH.P		M[+16]	499.747	2	998.486	998.488	0	-1.5	17	Non	493.55	397	78.64	5.95	1104	>sp|P02817|AMELX_BOVIN Amelogenin, X isoform OS=Bos taurus OX=9913 GN=AMELX PE=1 SV=2	1	hf1_eb_18273_84_20032023.ScanId;v=1;d1=6626.6626.2	controllerType=0 controllerNumber=1 scan=6626	22.766
04732:2	1	S.M[+15.995]PLPPHPGH.P		M[+16]	499.747	2	998.487	998.488	0	-0.7	17	Non	495.61	446.09	73.77	6.17	1104	>sp|P02817|AMELX_BOVIN Amelogenin, X isoform OS=Bos taurus OX=9913 GN=AMELX PE=1 SV=2	1	hf1_eb_18273_84_20032023.ScanId;v=1;d1=6129.6129.2	controllerType=0 controllerNumber=1 scan=6129	21.6979
04930:2	1	S.M[+15.995]PLPPHPGH.P		M[+16]	499.747	2	998.486	998.488	0	-1.8	17	Non	504.16	441.83	76.33	5.96	1104	>sp|P02817|AMELX_BOVIN Amelogenin, X isoform OS=Bos taurus OX=9913 GN=AMELX PE=1 SV=2	1	hf1_eb_18273_84_20032023.ScanId;v=1;d1=6297.6297.2	controllerType=0 controllerNumber=1 scan=6297	22.0409
04109:2	1	S.M[+15.995]PLPPHPGH.P		M[+16]	499.747	2	998.487	998.488	0	-1	17	Non	513.66	400.03	79.08	6.64	1104	>sp|P02817|AMELX_BOVIN Amelogenin, X isoform OS=Bos taurus OX=9913 GN=AMELX PE=1 SV=2	1	hf1_eb_18273_84_20032023.ScanId;v=1;d1=5627.5627.2	controllerType=0 controllerNumber=1 scan=5627	20.6658
04295:2	1	S.M[+15.995]PLPPHPGH.P		M[+16]	499.747	2	998.487	998.488	0	-0.8	17	Non	525.17	464.95	82.85	6.69	1104	>sp|P02817|AMELX_BOVIN Amelogenin, X isoform OS=Bos taurus OX=9913 GN=AMELX PE=1 SV=2	1	hf1_eb_18273_84_20032023.ScanId;v=1;d1=5783.5783.2	controllerType=0 controllerNumber=1 scan=5783	21.0115
03940:2	1	S.M[+15.995]PLPPHPGH.P		M[+16]	499.747	2	998.486	998.488	0	-1.5	17	Non	549.73	487.89	118.85	6.69	1104	>sp|P02817|AMELX_BOVIN Amelogenin, X isoform OS=Bos taurus OX=9913 GN=AMELX PE=1 SV=2	1	hf1_eb_18273_84_20032023.ScanId;v=1;d1=5482.5482.2	controllerType=0 controllerNumber=1 scan=5482	20.3249
04498:2	1	S.M[+15.995]PLPPHPGH.P		M[+16]	499.747	2	998.487	998.488	0	-0.8	17	Non	590.66	534.4	98.09	7.36	1104	>sp|P02817|AMELX_BOVIN Amelogenin, X isoform OS=Bos taurus OX=9913 GN=AMELX PE=1 SV=2	1	hf1_eb_18273_84_20032023.ScanId;v=1;d1=5949.5949.2	controllerType=0 controllerNumber=1 scan=5949	21.3495
07252:2	1	S.M[+15.995]PLPPHP[+31.990]GH.P		M[+16], P[+32]	515.742	2	1030.48	1030.48	0	-1.3	17	Non	255.22	127.91	14	2.11	1104	>sp|P02817|AMELX_BOVIN Amelogenin, X isoform OS=Bos taurus OX=9913 GN=AMELX PE=1 SV=2	1	hf1_eb_18273_84_20032023.ScanId;v=1;d1=8230.8230.2	controllerType=0 controllerNumber=1 scan=8230	26.0968
07047:2	1	S.M[+15.995]PLPPHP[+31.990]GH.P		M[+16], P[+32]	515.741	2	1030.48	1030.48	0	-2.1	17	Non	376.8	282.39	70.72	4.7	1104	>sp|P02817|AMELX_BOVIN Amelogenin, X isoform OS=Bos taurus OX=9913 GN=AMELX PE=1 SV=2	1	hf1_eb_18273_84_20032023.ScanId;v=1;d1=8064.8064.2	controllerType=0 controllerNumber=1 scan=8064	25.7509
06648:2	1	S.M[+15.995]PLPPHPGHP.G		M[+16]	548.273	2	1095.54	1095.54	0	-1.7	17	Non	221.86	178.3	14.12	2.19	1104	>sp|P02817|AMELX_BOVIN Amelogenin, X isoform OS=Bos taurus OX=9913 GN=AMELX PE=1 SV=2	1	hf1_eb_18273_84_20032023.ScanId;v=1;d1=7739.7739.2	controllerType=0 controllerNumber=1 scan=7739	25.0898
07785:2	1	S.MP[+31.990]LPPHPGHP.G		P[+32]	556.271	2	1111.54	1111.54	0	-0.2	17	Non	275.63	204.08	0	4.14	1104	>sp|P02817|AMELX_BOVIN Amelogenin, X isoform OS=Bos taurus OX=9913 GN=AMELX PE=1 SV=2	1	hf1_eb_18273_84_20032023.ScanId;v=1;d1=8648.8648.2	controllerType=0 controllerNumber=1 scan=8648	26.9101
06938:2	1	S.M[+31.990]PLPPHPGHP.G		M[+32]	556.272	2	1111.54	1111.54	0	0.5	17	Non	330.78	296.49	0	4.69	1104	>sp|P02817|AMELX_BOVIN Amelogenin, X isoform OS=Bos taurus OX=9913 GN=AMELX PE=1 SV=2	1	hf1_eb_18273_84_20032023.ScanId;v=1;d1=7976.7976.2	controllerType=0 controllerNumber=1 scan=7976	25.5711
07414:2	1	S.M[+31.990]PLPPHPGHP.G		M[+32]	556.271	2	1111.53	1111.54	0	-0.9	17	Non	374.91	311	10.37	5.19	1104	>sp|P02817|AMELX_BOVIN Amelogenin, X isoform OS=Bos taurus OX=9913 GN=AMELX PE=1 SV=2	1	hf1_eb_18273_84_20032023.ScanId;v=1;d1=8360.8360.2	controllerType=0 controllerNumber=1 scan=8360	26.3541
07151:2	1	S.M[+31.990]PLPPHPGHP.G		M[+32]	556.271	2	1111.53	1111.54	0	-1.2	17	Non	394.67	325.09	0	5.28	1104	>sp|P02817|AMELX_BOVIN Amelogenin, X isoform OS=Bos taurus OX=9913 GN=AMELX PE=1 SV=2	1	hf1_eb_18273_84_20032023.ScanId;v=1;d1=8147.8147.2	controllerType=0 controllerNumber=1 scan=8147	25.9148
07149:2	1	S.M[+31.990]PLPPHPGHP.G		M[+32]	556.271	2	1111.53	1111.54	0	-1.2	17	Non	460.51	339.5	0	5.32	1104	>sp|P02817|AMELX_BOVIN Amelogenin, X isoform OS=Bos taurus OX=9913 GN=AMELX PE=1 SV=2	1	hf1_eb_18273_84_20032023.ScanId;v=1;d1=8146.8146.2	controllerType=0 controllerNumber=1 scan=8146	25.9133
06459:2	1	S.M[+15.995]PLPPHPGHP.G		M[+16]	548.273	2	1095.54	1095.54	0	-1.6	17	Non	561.87	345.45	69.29	6.54	1104	>sp|P02817|AMELX_BOVIN Amelogenin, X isoform OS=Bos taurus OX=9913 GN=AMELX PE=1 SV=2	1	hf1_eb_18273_84_20032023.ScanId;v=1;d1=7575.7575.2	controllerType=0 controllerNumber=1 scan=7575	24.7026
05608:2	1	S.M[+15.995]PLPPHPGHP.G		M[+16]	548.273	2	1095.54	1095.54	0	-1.6	17	Non	592.74	419.11	68.12	7.31	1104	>sp|P02817|AMELX_BOVIN Amelogenin, X isoform OS=Bos taurus OX=9913 GN=AMELX PE=1 SV=2	1	hf1_eb_18273_84_20032023.ScanId;v=1;d1=6881.6881.2	controllerType=0 controllerNumber=1 scan=6881	23.3456
06028:2	1	S.M[+15.995]PLPPHPGHP.G		M[+16]	548.274	2	1095.54	1095.54	0	-0.4	17	Non	619.94	374.92	68.82	8.53	1104	>sp|P02817|AMELX_BOVIN Amelogenin, X isoform OS=Bos taurus OX=9913 GN=AMELX PE=1 SV=2	1	hf1_eb_18273_84_20032023.ScanId;v=1;d1=7231.7231.2	controllerType=0 controllerNumber=1 scan=7231	24.0267
06627:2	1	S.M[+15.995]PLPPHPGHP.G		M[+16]	548.273	2	1095.54	1095.54	0	-1.6	17	Non	639.4	391.5	80.49	8.31	1104	>sp|P02817|AMELX_BOVIN Amelogenin, X isoform OS=Bos taurus OX=9913 GN=AMELX PE=1 SV=2	1	hf1_eb_18273_84_20032023.ScanId;v=1;d1=7722.7722.2	controllerType=0 controllerNumber=1 scan=7722	25.0507
05809:2	1	S.M[+15.995]PLPPHPGHP.G		M[+16]	548.274	2	1095.54	1095.54	0	-0.6	17	Non	654.77	405.36	88.36	9.53	1104	>sp|P02817|AMELX_BOVIN Amelogenin, X isoform OS=Bos taurus OX=9913 GN=AMELX PE=1 SV=2	1	hf1_eb_18273_84_20032023.ScanId;v=1;d1=7052.7052.2	controllerType=0 controllerNumber=1 scan=7052	23.6893
06233:2	1	S.M[+15.995]PLPPHPGHP.G		M[+16]	548.274	2	1095.54	1095.54	0	-0.1	17	Non	657.45	385.07	76.56	9.53	1104	>sp|P02817|AMELX_BOVIN Amelogenin, X isoform OS=Bos taurus OX=9913 GN=AMELX PE=1 SV=2	1	hf1_eb_18273_84_20032023.ScanId;v=1;d1=7397.7397.2	controllerType=0 controllerNumber=1 scan=7397	24.3643
08708:2	1	S.M[+15.995]PLPPHP[+31.990]GHP.G		M[+16], P[+32]	564.268	2	1127.53	1127.53	0	-1.3	17	Non	273.32	227.34	30.2	3.54	1104	>sp|P02817|AMELX_BOVIN Amelogenin, X isoform OS=Bos taurus OX=9913 GN=AMELX PE=1 SV=2	1	hf1_eb_18273_84_20032023.ScanId;v=1;d1=9369.9369.2	controllerType=0 controllerNumber=1 scan=9369	28.3285
04576:2	1	S.M[+15.995]PLPPHPGH[+15.995]P.G		H[+16], M[+16]	556.27	2	1111.53	1111.54	0	-2.2	17	Non	274.76	184.19	5.91	3.53	1104	>sp|P02817|AMELX_BOVIN Amelogenin, X isoform OS=Bos taurus OX=9913 GN=AMELX PE=1 SV=2	1	hf1_eb_18273_84_20032023.ScanId;v=1;d1=6008.6008.2	controllerType=0 controllerNumber=1 scan=6008	21.467
05095:2	1	S.M[+15.995]PLPPHP[+15.995]GHP.G		M[+16], P[+16]	556.272	2	1111.54	1111.54	0	1.2	17	Non	298.26	222.57	2.16	4.15	1104	>sp|P02817|AMELX_BOVIN Amelogenin, X isoform OS=Bos taurus OX=9913 GN=AMELX PE=1 SV=2	1	hf1_eb_18273_84_20032023.ScanId;v=1;d1=6441.6441.2	controllerType=0 controllerNumber=1 scan=6441	22.3682
09169:2	1	S.M[+15.995]PLPPHP[+31.990]GHP.G		M[+16], P[+32]	564.268	2	1127.53	1127.53	0	-1.6	17	Non	301.74	226.81	6.99	3.68	1104	>sp|P02817|AMELX_BOVIN Amelogenin, X isoform OS=Bos taurus OX=9913 GN=AMELX PE=1 SV=2	1	hf1_eb_18273_84_20032023.ScanId;v=1;d1=9719.9719.2	controllerType=0 controllerNumber=1 scan=9719	29.0151
04916:2	1	S.M[+15.995]PLPPHPGH[+15.995]P.G		H[+16], M[+16]	556.27	2	1111.53	1111.54	0	-1.6	17	Non	329.35	286.97	2.67	4.98	1104	>sp|P02817|AMELX_BOVIN Amelogenin, X isoform OS=Bos taurus OX=9913 GN=AMELX PE=1 SV=2	1	hf1_eb_18273_84_20032023.ScanId;v=1;d1=6284.6284.2	controllerType=0 controllerNumber=1 scan=6284	22.0168
08610:3	1	S.MPLPPHPGHPG.Y			379.527	3	1136.57	1136.57	0	-1.2	17	Non	388.11	388.11	388.11	5.79	1104	>sp|P02817|AMELX_BOVIN Amelogenin, X isoform OS=Bos taurus OX=9913 GN=AMELX PE=1 SV=2	1	hf1_eb_18273_84_20032023.ScanId;v=1;d1=9290.9290.3	controllerType=0 controllerNumber=1 scan=9290	28.1713
09272:3	1	S.MPLPPHPGHPG.Y			379.527	3	1136.57	1136.57	0	-1.1	17	Non	445.2	438.48	438.48	6.06	1104	>sp|P02817|AMELX_BOVIN Amelogenin, X isoform OS=Bos taurus OX=9913 GN=AMELX PE=1 SV=2	1	hf1_eb_18273_84_20032023.ScanId;v=1;d1=9805.9805.3	controllerType=0 controllerNumber=1 scan=9805	29.1865
08829:3	1	S.MPLPPHPGHPG.Y			379.527	3	1136.57	1136.57	0	-1.4	17	Non	462.89	462.89	462.89	6.53	1104	>sp|P02817|AMELX_BOVIN Amelogenin, X isoform OS=Bos taurus OX=9913 GN=AMELX PE=1 SV=2	1	hf1_eb_18273_84_20032023.ScanId;v=1;d1=9464.9464.3	controllerType=0 controllerNumber=1 scan=9464	28.5134
09054:3	1	S.MPLPPHPGHPG.Y			379.527	3	1136.57	1136.57	0	-1.2	17	Non	478.09	478.09	478.09	6.53	1104	>sp|P02817|AMELX_BOVIN Amelogenin, X isoform OS=Bos taurus OX=9913 GN=AMELX PE=1 SV=2	1	hf1_eb_18273_84_20032023.ScanId;v=1;d1=9634.9634.3	controllerType=0 controllerNumber=1 scan=9634	28.8499
37430:2	1	S.MP[+15.995]LPPHPGHPG.Y		P[+16]	576.785	2	1152.56	1152.56	0	0.4	17	Non	107.87	107.87	4	2.27	1104	>sp|P02817|AMELX_BOVIN Amelogenin, X isoform OS=Bos taurus OX=9913 GN=AMELX PE=1 SV=2	1	hf1_eb_18273_84_20032023.ScanId;v=1;d1=31198.31198.2	controllerType=0 controllerNumber=1 scan=31198	73.0528
37651:3	1	S.MP[+15.995]LPPHPGHPG.Y		P[+16]	384.859	3	1152.56	1152.56	0	0	17	Non	111.09	111.09	4	1.5	1104	>sp|P02817|AMELX_BOVIN Amelogenin, X isoform OS=Bos taurus OX=9913 GN=AMELX PE=1 SV=2	1	hf1_eb_18273_84_20032023.ScanId;v=1;d1=31433.31433.3	controllerType=0 controllerNumber=1 scan=31433	73.9549
08997:3	1	S.MP[+15.995]LPPHPGHPG.Y		P[+16]	384.858	3	1152.56	1152.56	0	-1.6	17	Non	204.93	204.93	4	2.22	1104	>sp|P02817|AMELX_BOVIN Amelogenin, X isoform OS=Bos taurus OX=9913 GN=AMELX PE=1 SV=2	1	hf1_eb_18273_84_20032023.ScanId;v=1;d1=9589.9589.3	controllerType=0 controllerNumber=1 scan=9589	28.7604
08439:3	1	S.MP[+15.995]LPPHPGHPG.Y		P[+16]	384.858	3	1152.56	1152.56	0	-1	17	Non	237.52	237.52	5.8	2.34	1104	>sp|P02817|AMELX_BOVIN Amelogenin, X isoform OS=Bos taurus OX=9913 GN=AMELX PE=1 SV=2	1	hf1_eb_18273_84_20032023.ScanId;v=1;d1=9159.9159.3	controllerType=0 controllerNumber=1 scan=9159	27.9145
07000:3	1	S.M[+15.995]PLPPHPGHPG.Y		M[+16]	384.858	3	1152.56	1152.56	0	-2.3	17	Non	245.29	245.29	3.19	3.65	1104	>sp|P02817|AMELX_BOVIN Amelogenin, X isoform OS=Bos taurus OX=9913 GN=AMELX PE=1 SV=2	1	hf1_eb_18273_84_20032023.ScanId;v=1;d1=8023.8023.2	controllerType=0 controllerNumber=1 scan=8023	25.6705
06842:2	1	S.MP[+15.995]LPPHPGHPG.Y		P[+16]	576.783	2	1152.56	1152.56	0	-2.9	17	Non	254.48	254.48	3.99	3.96	1104	>sp|P02817|AMELX_BOVIN Amelogenin, X isoform OS=Bos taurus OX=9913 GN=AMELX PE=1 SV=2	1	hf1_eb_18273_84_20032023.ScanId;v=1;d1=7895.7895.2	controllerType=0 controllerNumber=1 scan=7895	25.4027
07405:3	1	S.M[+15.995]PLPPHPGHPG.Y		M[+16]	384.858	3	1152.56	1152.56	0	-1.8	17	Non	271.91	271.91	3.55	3.97	1104	>sp|P02817|AMELX_BOVIN Amelogenin, X isoform OS=Bos taurus OX=9913 GN=AMELX PE=1 SV=2	1	hf1_eb_18273_84_20032023.ScanId;v=1;d1=8353.8353.3	controllerType=0 controllerNumber=1 scan=8353	26.3389
07633:3	1	S.M[+15.995]PLPPHPGHPG.Y		M[+16]	384.859	3	1152.56	1152.56	0	-0.7	17	Non	276.12	276.12	5.62	3.86	1104	>sp|P02817|AMELX_BOVIN Amelogenin, X isoform OS=Bos taurus OX=9913 GN=AMELX PE=1 SV=2	1	hf1_eb_18273_84_20032023.ScanId;v=1;d1=8530.8530.3	controllerType=0 controllerNumber=1 scan=8530	26.6886
07155:3	1	S.M[+15.995]PLPPHPGHPG.Y		M[+16]	384.858	3	1152.56	1152.56	0	-1.9	17	Non	318.25	318.25	26.36	4.57	1104	>sp|P02817|AMELX_BOVIN Amelogenin, X isoform OS=Bos taurus OX=9913 GN=AMELX PE=1 SV=2	1	hf1_eb_18273_84_20032023.ScanId;v=1;d1=8152.8152.3	controllerType=0 controllerNumber=1 scan=8152	25.9307
37463:3	1	S.MP[+15.995]LPPHPGHPG.Y		P[+16]	384.86	3	1152.56	1152.56	0	2.3	17	Non	352.9	352.9	4	3.91	1104	>sp|P02817|AMELX_BOVIN Amelogenin, X isoform OS=Bos taurus OX=9913 GN=AMELX PE=1 SV=2	1	hf1_eb_18273_84_20032023.ScanId;v=1;d1=31246.31246.3	controllerType=0 controllerNumber=1 scan=31246	73.2735
06064:2	1	S.M[+31.990]PLPPHPGHPG.Y		M[+32]	584.782	2	1168.56	1168.56	0	0	17	Non	360.37	360.37	0	5.95	1104	>sp|P02817|AMELX_BOVIN Amelogenin, X isoform OS=Bos taurus OX=9913 GN=AMELX PE=1 SV=2	1	hf1_eb_18273_84_20032023.ScanId;v=1;d1=7259.7259.2	controllerType=0 controllerNumber=1 scan=7259	24.0829
04614:3	1	S.M[+15.995]PLPPHPGHPG.Y		M[+16]	384.858	3	1152.56	1152.56	0	-1	17	Non	373.18	334.09	27.9	5.71	1104	>sp|P02817|AMELX_BOVIN Amelogenin, X isoform OS=Bos taurus OX=9913 GN=AMELX PE=1 SV=2	1	hf1_eb_18273_84_20032023.ScanId;v=1;d1=6036.6036.3	controllerType=0 controllerNumber=1 scan=6036	21.5246
06098:2	1	S.M[+31.990]PLPPHPGHPG.Y		M[+32]	584.781	2	1168.56	1168.56	0	-1	17	Non	375.47	375.47	0	6.05	1104	>sp|P02817|AMELX_BOVIN Amelogenin, X isoform OS=Bos taurus OX=9913 GN=AMELX PE=1 SV=2	1	hf1_eb_18273_84_20032023.ScanId;v=1;d1=7285.7285.2	controllerType=0 controllerNumber=1 scan=7285	24.1345
06174:3	1	S.M[+15.995]PLPPHPGHPG.Y		M[+16]	384.859	3	1152.56	1152.56	0	-0.7	17	Non	397.67	397.67	28.09	6.02	1104	>sp|P02817|AMELX_BOVIN Amelogenin, X isoform OS=Bos taurus OX=9913 GN=AMELX PE=1 SV=2	1	hf1_eb_18273_84_20032023.ScanId;v=1;d1=7346.7346.3	controllerType=0 controllerNumber=1 scan=7346	24.2549
04636:2	1	S.M[+15.995]PLPPHPGHPG.Y		M[+16]	576.785	2	1152.56	1152.56	0	0.1	17	Non	400.91	369.98	60.13	6.06	1104	>sp|P02817|AMELX_BOVIN Amelogenin, X isoform OS=Bos taurus OX=9913 GN=AMELX PE=1 SV=2	1	hf1_eb_18273_84_20032023.ScanId;v=1;d1=6054.6054.2	controllerType=0 controllerNumber=1 scan=6054	21.5597
06376:3	1	S.M[+15.995]PLPPHPGHPG.Y		M[+16]	384.858	3	1152.56	1152.56	0	-0.8	17	Non	403.69	403.69	13.37	6.03	1104	>sp|P02817|AMELX_BOVIN Amelogenin, X isoform OS=Bos taurus OX=9913 GN=AMELX PE=1 SV=2	1	hf1_eb_18273_84_20032023.ScanId;v=1;d1=7513.7513.3	controllerType=0 controllerNumber=1 scan=7513	24.5927
05003:3	1	S.M[+15.995]PLPPHPGHPG.Y		M[+16]	384.859	3	1152.56	1152.56	0	-0.4	17	Non	411.27	411.27	11.46	6.5	1104	>sp|P02817|AMELX_BOVIN Amelogenin, X isoform OS=Bos taurus OX=9913 GN=AMELX PE=1 SV=2	1	hf1_eb_18273_84_20032023.ScanId;v=1;d1=6367.6367.3	controllerType=0 controllerNumber=1 scan=6367	22.2131
37568:3	1	S.M[+15.995]PLPPHPGHPG.Y		M[+16]	384.859	3	1152.56	1152.56	0	0.2	17	Non	412.46	412.46	12.16	6.5	1104	>sp|P02817|AMELX_BOVIN Amelogenin, X isoform OS=Bos taurus OX=9913 GN=AMELX PE=1 SV=2	1	hf1_eb_18273_84_20032023.ScanId;v=1;d1=31347.31347.3	controllerType=0 controllerNumber=1 scan=31347	73.6112
05745:3	1	S.M[+15.995]PLPPHPGHPG.Y		M[+16]	384.858	3	1152.56	1152.56	0	-0.9	17	Non	413.55	413.55	28.75	6.5	1104	>sp|P02817|AMELX_BOVIN Amelogenin, X isoform OS=Bos taurus OX=9913 GN=AMELX PE=1 SV=2	1	hf1_eb_18273_84_20032023.ScanId;v=1;d1=6997.6997.3	controllerType=0 controllerNumber=1 scan=6997	23.5747
06795:3	1	S.M[+15.995]PLPPHPGHPG.Y		M[+16]	384.858	3	1152.56	1152.56	0	-2.2	17	Non	415.34	415.34	27.29	5.53	1104	>sp|P02817|AMELX_BOVIN Amelogenin, X isoform OS=Bos taurus OX=9913 GN=AMELX PE=1 SV=2	1	hf1_eb_18273_84_20032023.ScanId;v=1;d1=7857.7857.3	controllerType=0 controllerNumber=1 scan=7857	25.332
05567:3	1	S.M[+15.995]PLPPHPGHPG.Y		M[+16]	384.858	3	1152.56	1152.56	0	-2.3	17	Non	420.42	420.42	28.62	6.28	1104	>sp|P02817|AMELX_BOVIN Amelogenin, X isoform OS=Bos taurus OX=9913 GN=AMELX PE=1 SV=2	1	hf1_eb_18273_84_20032023.ScanId;v=1;d1=6839.6839.3	controllerType=0 controllerNumber=1 scan=6839	23.2345
06562:3	1	S.M[+15.995]PLPPHPGHPG.Y		M[+16]	384.858	3	1152.56	1152.56	0	-2.4	17	Non	424.78	398.2	26.47	5.81	1104	>sp|P02817|AMELX_BOVIN Amelogenin, X isoform OS=Bos taurus OX=9913 GN=AMELX PE=1 SV=2	1	hf1_eb_18273_84_20032023.ScanId;v=1;d1=7668.7668.3	controllerType=0 controllerNumber=1 scan=7668	24.9336
05960:3	1	S.M[+15.995]PLPPHPGHPG.Y		M[+16]	384.859	3	1152.56	1152.56	0	-0.2	17	Non	436.13	436.13	12.07	6.5	1104	>sp|P02817|AMELX_BOVIN Amelogenin, X isoform OS=Bos taurus OX=9913 GN=AMELX PE=1 SV=2	1	hf1_eb_18273_84_20032023.ScanId;v=1;d1=7176.7176.3	controllerType=0 controllerNumber=1 scan=7176	23.9171
06407:3	1	S.M[+31.990]PLPPHPGHPG.Y		M[+32]	390.19	3	1168.56	1168.56	0	-0.9	17	Non	449.5	449.5	17.32	6.53	1104	>sp|P02817|AMELX_BOVIN Amelogenin, X isoform OS=Bos taurus OX=9913 GN=AMELX PE=1 SV=2	1	hf1_eb_18273_84_20032023.ScanId;v=1;d1=7534.7534.3	controllerType=0 controllerNumber=1 scan=7534	24.6311
05973:3	1	S.M[+31.990]PLPPHPGHPG.Y		M[+32]	390.19	3	1168.56	1168.56	0	-0.5	17	Non	451.5	451.5	16.89	6.53	1104	>sp|P02817|AMELX_BOVIN Amelogenin, X isoform OS=Bos taurus OX=9913 GN=AMELX PE=1 SV=2	1	hf1_eb_18273_84_20032023.ScanId;v=1;d1=7188.7188.3	controllerType=0 controllerNumber=1 scan=7188	23.9418
05197:3	1	S.M[+15.995]PLPPHPGHPG.Y		M[+16]	384.859	3	1152.56	1152.56	0	-0.4	17	Non	454.26	446.38	13.49	6.53	1104	>sp|P02817|AMELX_BOVIN Amelogenin, X isoform OS=Bos taurus OX=9913 GN=AMELX PE=1 SV=2	1	hf1_eb_18273_84_20032023.ScanId;v=1;d1=6527.6527.3	controllerType=0 controllerNumber=1 scan=6527	22.5475
05388:3	1	S.M[+15.995]PLPPHPGHPG.Y		M[+16]	384.859	3	1152.56	1152.56	0	-0.6	17	Non	460.54	435.75	30.03	6.53	1104	>sp|P02817|AMELX_BOVIN Amelogenin, X isoform OS=Bos taurus OX=9913 GN=AMELX PE=1 SV=2	1	hf1_eb_18273_84_20032023.ScanId;v=1;d1=6687.6687.3	controllerType=0 controllerNumber=1 scan=6687	22.8947
04826:3	1	S.M[+15.995]PLPPHPGHPG.Y		M[+16]	384.859	3	1152.56	1152.56	0	-0.1	17	Non	462.39	462.39	28.63	6.53	1104	>sp|P02817|AMELX_BOVIN Amelogenin, X isoform OS=Bos taurus OX=9913 GN=AMELX PE=1 SV=2	1	hf1_eb_18273_84_20032023.ScanId;v=1;d1=6211.6211.3	controllerType=0 controllerNumber=1 scan=6211	21.8713
06189:3	1	S.M[+31.990]PLPPHPGHPG.Y		M[+32]	390.19	3	1168.56	1168.56	0	-0.9	17	Non	470.09	470.09	17.37	6.53	1104	>sp|P02817|AMELX_BOVIN Amelogenin, X isoform OS=Bos taurus OX=9913 GN=AMELX PE=1 SV=2	1	hf1_eb_18273_84_20032023.ScanId;v=1;d1=7360.7360.3	controllerType=0 controllerNumber=1 scan=7360	24.2844
05756:2	1	S.M[+15.995]PLPPHPGHPG.Y		M[+16]	576.784	2	1152.56	1152.56	0	-1	17	Non	606.44	549.99	42.43	8.53	1104	>sp|P02817|AMELX_BOVIN Amelogenin, X isoform OS=Bos taurus OX=9913 GN=AMELX PE=1 SV=2	1	hf1_eb_18273_84_20032023.ScanId;v=1;d1=7008.7008.2	controllerType=0 controllerNumber=1 scan=7008	23.6038
05974:2	1	S.M[+15.995]PLPPHPGHPG.Y		M[+16]	576.784	2	1152.56	1152.56	0	-0.4	17	Non	609.49	518.91	89.41	8.53	1104	>sp|P02817|AMELX_BOVIN Amelogenin, X isoform OS=Bos taurus OX=9913 GN=AMELX PE=1 SV=2	1	hf1_eb_18273_84_20032023.ScanId;v=1;d1=7189.7189.2	controllerType=0 controllerNumber=1 scan=7189	23.9429
05574:2	1	S.M[+15.995]PLPPHPGHPG.Y		M[+16]	576.783	2	1152.56	1152.56	0	-2	17	Non	616.42	554.03	73.49	8.31	1104	>sp|P02817|AMELX_BOVIN Amelogenin, X isoform OS=Bos taurus OX=9913 GN=AMELX PE=1 SV=2	1	hf1_eb_18273_84_20032023.ScanId;v=1;d1=6847.6847.2	controllerType=0 controllerNumber=1 scan=6847	23.2601
04843:2	1	S.M[+15.995]PLPPHPGHPG.Y		M[+16]	576.784	2	1152.56	1152.56	0	-0.9	17	Non	617.88	533.44	76.42	8.53	1104	>sp|P02817|AMELX_BOVIN Amelogenin, X isoform OS=Bos taurus OX=9913 GN=AMELX PE=1 SV=2	1	hf1_eb_18273_84_20032023.ScanId;v=1;d1=6226.6226.2	controllerType=0 controllerNumber=1 scan=6226	21.901
05018:2	1	S.M[+15.995]PLPPHPGHPG.Y		M[+16]	576.784	2	1152.56	1152.56	0	-1.3	17	Non	626.83	568.42	101.63	8.53	1104	>sp|P02817|AMELX_BOVIN Amelogenin, X isoform OS=Bos taurus OX=9913 GN=AMELX PE=1 SV=2	1	hf1_eb_18273_84_20032023.ScanId;v=1;d1=6381.6381.2	controllerType=0 controllerNumber=1 scan=6381	22.2421
05226:2	1	S.M[+15.995]PLPPHPGHPG.Y		M[+16]	576.784	2	1152.56	1152.56	0	-1.5	17	Non	627.23	576.83	97.51	8.31	1104	>sp|P02817|AMELX_BOVIN Amelogenin, X isoform OS=Bos taurus OX=9913 GN=AMELX PE=1 SV=2	1	hf1_eb_18273_84_20032023.ScanId;v=1;d1=6547.6547.2	controllerType=0 controllerNumber=1 scan=6547	22.5871
05399:2	1	S.M[+15.995]PLPPHPGHPG.Y		M[+16]	576.784	2	1152.56	1152.56	0	-1.5	17	Non	646.76	586.74	100	8.31	1104	>sp|P02817|AMELX_BOVIN Amelogenin, X isoform OS=Bos taurus OX=9913 GN=AMELX PE=1 SV=2	1	hf1_eb_18273_84_20032023.ScanId;v=1;d1=6698.6698.2	controllerType=0 controllerNumber=1 scan=6698	22.9228
08664:2	1	S.M[+15.995]PLPPHP[+31.990]GHPG.Y		M[+16], P[+32]	592.78	2	1184.55	1184.55	0	1.2	17	Non	226.81	225.08	18.43	2.77	1104	>sp|P02817|AMELX_BOVIN Amelogenin, X isoform OS=Bos taurus OX=9913 GN=AMELX PE=1 SV=2	1	hf1_eb_18273_84_20032023.ScanId;v=1;d1=9331.9331.2	controllerType=0 controllerNumber=1 scan=9331	28.252
07423:2	1	S.MP[+15.995]LPPHP[+31.990]GHPG.Y		P[+16][+32]	592.778	2	1184.55	1184.55	0	-2.3	17	Non	230.23	230.23	4	2.4	1104	>sp|P02817|AMELX_BOVIN Amelogenin, X isoform OS=Bos taurus OX=9913 GN=AMELX PE=1 SV=2	1	hf1_eb_18273_84_20032023.ScanId;v=1;d1=8366.8366.2	controllerType=0 controllerNumber=1 scan=8366	26.3651
03850:3	1	S.MP[+15.995]LPPHPGHP[+15.995]G.Y		P[+16]*2	390.189	3	1168.55	1168.56	0	-2.9	17	Non	233.78	233.78	4	2.98	1104	>sp|P02817|AMELX_BOVIN Amelogenin, X isoform OS=Bos taurus OX=9913 GN=AMELX PE=1 SV=2	1	hf1_eb_18273_84_20032023.ScanId;v=1;d1=5393.5393.2	controllerType=0 controllerNumber=1 scan=5393	20.1033
07588:2	1	S.M[+15.995]PLPPHP[+31.990]GHPG.Y		M[+16], P[+32]	592.778	2	1184.55	1184.55	0	-2.2	17	Non	250.41	250.41	31.77	4.29	1104	>sp|P02817|AMELX_BOVIN Amelogenin, X isoform OS=Bos taurus OX=9913 GN=AMELX PE=1 SV=2	1	hf1_eb_18273_84_20032023.ScanId;v=1;d1=8500.8500.2	controllerType=0 controllerNumber=1 scan=8500	26.6352
04216:2	1	S.M[+15.995]PLPPHPGHP[+15.995]G.Y		M[+16], P[+16]	584.781	2	1168.56	1168.56	0	-1.2	17	Non	278.73	200.65	0.97	4.07	1104	>sp|P02817|AMELX_BOVIN Amelogenin, X isoform OS=Bos taurus OX=9913 GN=AMELX PE=1 SV=2	1	hf1_eb_18273_84_20032023.ScanId;v=1;d1=5719.5719.2	controllerType=0 controllerNumber=1 scan=5719	20.8751
04788:3	1	S.MP[+15.995]LPPH[+15.995]PGHPG.Y		H[+16], P[+16]	390.19	3	1168.55	1168.56	0	-1.6	17	Non	282.3	170.38	2.32	3.89	1104	>sp|P02817|AMELX_BOVIN Amelogenin, X isoform OS=Bos taurus OX=9913 GN=AMELX PE=1 SV=2	1	hf1_eb_18273_84_20032023.ScanId;v=1;d1=6178.6178.3	controllerType=0 controllerNumber=1 scan=6178	21.7981
03878:2	1	S.M[+15.995]PLPPHPGHP[+15.995]G.Y		M[+16], P[+16]	584.782	2	1168.56	1168.56	0	-0.7	17	Non	291.78	223.07	5.15	4.82	1104	>sp|P02817|AMELX_BOVIN Amelogenin, X isoform OS=Bos taurus OX=9913 GN=AMELX PE=1 SV=2	1	hf1_eb_18273_84_20032023.ScanId;v=1;d1=5424.5424.2	controllerType=0 controllerNumber=1 scan=5424	20.1789
04002:3	1	S.M[+15.995]PLPPHPGHP[+15.995]G.Y		M[+16], P[+16]	390.19	3	1168.55	1168.56	0	-2	17	Non	327.66	325.78	16.64	4.75	1104	>sp|P02817|AMELX_BOVIN Amelogenin, X isoform OS=Bos taurus OX=9913 GN=AMELX PE=1 SV=2	1	hf1_eb_18273_84_20032023.ScanId;v=1;d1=5532.5532.3	controllerType=0 controllerNumber=1 scan=5532	20.4464
04572:3	1	S.M[+15.995]PLPPHPGH[+15.995]PG.Y		H[+16], M[+16]	390.19	3	1168.56	1168.56	0	-1	17	Non	328.06	282.72	4.29	4.81	1104	>sp|P02817|AMELX_BOVIN Amelogenin, X isoform OS=Bos taurus OX=9913 GN=AMELX PE=1 SV=2	1	hf1_eb_18273_84_20032023.ScanId;v=1;d1=6005.6005.3	controllerType=0 controllerNumber=1 scan=6005	21.4604
04360:3	1	S.M[+15.995]PLPPHPGHP[+15.995]G.Y		M[+16], P[+16]	390.19	3	1168.56	1168.56	0	-1.3	17	Non	348.6	348.6	6.2	5.19	1104	>sp|P02817|AMELX_BOVIN Amelogenin, X isoform OS=Bos taurus OX=9913 GN=AMELX PE=1 SV=2	1	hf1_eb_18273_84_20032023.ScanId;v=1;d1=5837.5837.3	controllerType=0 controllerNumber=1 scan=5837	21.1209
04169:3	1	S.M[+15.995]PLPPHPGHP[+15.995]G.Y		M[+16], P[+16]	390.19	3	1168.56	1168.56	0	-1.4	17	Non	355.38	321.59	13.7	5.19	1104	>sp|P02817|AMELX_BOVIN Amelogenin, X isoform OS=Bos taurus OX=9913 GN=AMELX PE=1 SV=2	1	hf1_eb_18273_84_20032023.ScanId;v=1;d1=5678.5678.3	controllerType=0 controllerNumber=1 scan=5678	20.784
03726:2	1	S.M[+15.995]PLPPHPGHP[+15.995]G.Y		M[+16], P[+16]	584.781	2	1168.56	1168.56	0	-1.2	17	Non	355.84	292.69	41.15	5.03	1104	>sp|P02817|AMELX_BOVIN Amelogenin, X isoform OS=Bos taurus OX=9913 GN=AMELX PE=1 SV=2	1	hf1_eb_18273_84_20032023.ScanId;v=1;d1=5284.5284.2	controllerType=0 controllerNumber=1 scan=5284	19.8372
08552:2	1	S.M[+15.995]PLPPHP[+31.990]GHPG.Y		M[+16], P[+32]	592.779	2	1184.55	1184.55	0	-0.1	17	Non	358.15	358.15	47.76	5.11	1104	>sp|P02817|AMELX_BOVIN Amelogenin, X isoform OS=Bos taurus OX=9913 GN=AMELX PE=1 SV=2	1	hf1_eb_18273_84_20032023.ScanId;v=1;d1=9245.9245.2	controllerType=0 controllerNumber=1 scan=9245	28.0791
03810:3	1	S.M[+15.995]PLPPHPGHP[+15.995]G.Y		M[+16], P[+16]	390.19	3	1168.55	1168.56	0	-1.8	17	Non	364.98	364.98	11.15	5.58	1104	>sp|P02817|AMELX_BOVIN Amelogenin, X isoform OS=Bos taurus OX=9913 GN=AMELX PE=1 SV=2	1	hf1_eb_18273_84_20032023.ScanId;v=1;d1=5358.5358.3	controllerType=0 controllerNumber=1 scan=5358	20.0174
07829:2	1	S.M[+15.995]PLPPHP[+31.990]GHPG.Y		M[+16], P[+32]	592.778	2	1184.55	1184.55	0	-1.8	17	Non	408.88	399.74	36.62	5.91	1104	>sp|P02817|AMELX_BOVIN Amelogenin, X isoform OS=Bos taurus OX=9913 GN=AMELX PE=1 SV=2	1	hf1_eb_18273_84_20032023.ScanId;v=1;d1=8683.8683.2	controllerType=0 controllerNumber=1 scan=8683	26.9785
08054:2	1	S.M[+15.995]PLPPHP[+31.990]GHPG.Y		M[+16], P[+32]	592.779	2	1184.55	1184.55	0	-1.2	17	Non	453.08	405.79	59.76	6.16	1104	>sp|P02817|AMELX_BOVIN Amelogenin, X isoform OS=Bos taurus OX=9913 GN=AMELX PE=1 SV=2	1	hf1_eb_18273_84_20032023.ScanId;v=1;d1=8862.8862.2	controllerType=0 controllerNumber=1 scan=8862	27.3228
11960:3	1	S.MPLPPHPGHPGY.I			433.881	3	1299.63	1299.63	0	-1.7	17	Non	432.24	411.06	411.06	5.59	1104	>sp|P02817|AMELX_BOVIN Amelogenin, X isoform OS=Bos taurus OX=9913 GN=AMELX PE=1 SV=2	1	hf1_eb_18273_84_20032023.ScanId;v=1;d1=11818.11818.3	controllerType=0 controllerNumber=1 scan=11818	32.9286
08969:2	1	S.M[+15.995]PLPPHPGHPGY.I		M[+16]	658.316	2	1315.63	1315.63	0	0.2	17	Non	354.27	354.27	10.69	5.28	1104	>sp|P02817|AMELX_BOVIN Amelogenin, X isoform OS=Bos taurus OX=9913 GN=AMELX PE=1 SV=2	1	hf1_eb_18273_84_20032023.ScanId;v=1;d1=9567.9567.2	controllerType=0 controllerNumber=1 scan=9567	28.7173
07695:3	1	S.M[+15.995]PLPPHPGHPGY.I		M[+16]	439.213	3	1315.62	1315.63	0	-1.5	17	Non	398.74	373.79	22.96	6.02	1104	>sp|P02817|AMELX_BOVIN Amelogenin, X isoform OS=Bos taurus OX=9913 GN=AMELX PE=1 SV=2	1	hf1_eb_18273_84_20032023.ScanId;v=1;d1=8581.8581.3	controllerType=0 controllerNumber=1 scan=8581	26.7876
08157:3	1	S.M[+15.995]PLPPHPGHPGY.I		M[+16]	439.214	3	1315.63	1315.63	0	1.3	17	Non	403.99	403.99	22.1	5.69	1104	>sp|P02817|AMELX_BOVIN Amelogenin, X isoform OS=Bos taurus OX=9913 GN=AMELX PE=1 SV=2	1	hf1_eb_18273_84_20032023.ScanId;v=1;d1=8943.8943.3	controllerType=0 controllerNumber=1 scan=8943	27.4832
08075:2	1	S.M[+15.995]PLPPHPGHPGY.I		M[+16]	658.313	2	1315.62	1315.63	0	-5	17	Non	460.58	460.58	63.05	5.81	1104	>sp|P02817|AMELX_BOVIN Amelogenin, X isoform OS=Bos taurus OX=9913 GN=AMELX PE=1 SV=2	1	hf1_eb_18273_84_20032023.ScanId;v=1;d1=8878.8878.2	controllerType=0 controllerNumber=1 scan=8878	27.351
07929:3	1	S.M[+15.995]PLPPHPGHPGY.I		M[+16]	439.213	3	1315.62	1315.63	0	-1.6	17	Non	490.77	490.77	26.66	6.28	1104	>sp|P02817|AMELX_BOVIN Amelogenin, X isoform OS=Bos taurus OX=9913 GN=AMELX PE=1 SV=2	1	hf1_eb_18273_84_20032023.ScanId;v=1;d1=8761.8761.3	controllerType=0 controllerNumber=1 scan=8761	27.1325
08288:2	1	S.M[+15.995]PLPPHPGHPGY.I		M[+16]	658.315	2	1315.62	1315.63	0	-1.9	17	Non	523.99	484.42	58.15	6.17	1104	>sp|P02817|AMELX_BOVIN Amelogenin, X isoform OS=Bos taurus OX=9913 GN=AMELX PE=1 SV=2	1	hf1_eb_18273_84_20032023.ScanId;v=1;d1=9039.9039.2	controllerType=0 controllerNumber=1 scan=9039	27.6649
08513:2	1	S.M[+15.995]PLPPHPGHPGY.I		M[+16]	658.315	2	1315.62	1315.63	0	-1.9	17	Non	532.08	487.74	66.3	6.17	1104	>sp|P02817|AMELX_BOVIN Amelogenin, X isoform OS=Bos taurus OX=9913 GN=AMELX PE=1 SV=2	1	hf1_eb_18273_84_20032023.ScanId;v=1;d1=9214.9214.2	controllerType=0 controllerNumber=1 scan=9214	28.0172
07037:3	1	S.M[+15.995]PLPPHPGHP[+15.995]GY.I		M[+16], P[+16]	444.543	3	1331.62	1331.62	0	-3.1	17	Non	347.78	347.78	7.29	4.68	1104	>sp|P02817|AMELX_BOVIN Amelogenin, X isoform OS=Bos taurus OX=9913 GN=AMELX PE=1 SV=2	1	hf1_eb_18273_84_20032023.ScanId;v=1;d1=8055.8055.3	controllerType=0 controllerNumber=1 scan=8055	25.7288
12018:3	1	S.M[+15.995]PLPPHPGHPGYI.N		M[+16]	476.908	3	1428.71	1428.71	0	-0.9	17	Non	372.99	372.99	7.15	6.22	1104	>sp|P02817|AMELX_BOVIN Amelogenin, X isoform OS=Bos taurus OX=9913 GN=AMELX PE=1 SV=2	1	hf1_eb_18273_84_20032023.ScanId;v=1;d1=11862.11862.3	controllerType=0 controllerNumber=1 scan=11862	33.0055
12275:3	1	S.M[+15.995]PLPPHPGHPGYI.N		M[+16]	476.908	3	1428.71	1428.71	0	0.6	17	Non	453.15	453.15	6.68	5.93	1104	>sp|P02817|AMELX_BOVIN Amelogenin, X isoform OS=Bos taurus OX=9913 GN=AMELX PE=1 SV=2	1	hf1_eb_18273_84_20032023.ScanId;v=1;d1=12049.12049.3	controllerType=0 controllerNumber=1 scan=12049	33.3498
12534:3	1	S.M[+15.995]PLPPHPGHPGYI.N		M[+16]	476.908	3	1428.71	1428.71	0	0.6	17	Non	482.03	482.03	14.63	5.89	1104	>sp|P02817|AMELX_BOVIN Amelogenin, X isoform OS=Bos taurus OX=9913 GN=AMELX PE=1 SV=2	1	hf1_eb_18273_84_20032023.ScanId;v=1;d1=12233.12233.3	controllerType=0 controllerNumber=1 scan=12233	33.6944
09872:3	1	S.M[+15.995]PLPPHPGHPGYIN.F		M[+16]	514.922	3	1542.75	1542.75	0	-0.8	17	Non	114.29	114.29	9.55	1.8	1104	>sp|P02817|AMELX_BOVIN Amelogenin, X isoform OS=Bos taurus OX=9913 GN=AMELX PE=1 SV=2	1	hf1_eb_18273_84_20032023.ScanId;v=1;d1=10256.10256.2	controllerType=0 controllerNumber=1 scan=10256	30.026
09960:2	1	S.MP[+15.995]LPPHPGHPGYIN.F		P[+16]	771.878	2	1542.75	1542.75	0	-2.1	17	Non	257.49	257.49	4	4.17	1104	>sp|P02817|AMELX_BOVIN Amelogenin, X isoform OS=Bos taurus OX=9913 GN=AMELX PE=1 SV=2	1	hf1_eb_18273_84_20032023.ScanId;v=1;d1=10322.10322.2	controllerType=0 controllerNumber=1 scan=10322	30.1518
09946:3	1	S.M[+15.995]PLPPHPGHPGYIN.F		M[+16]	514.922	3	1542.75	1542.75	0	-1.1	17	Non	294.39	294.39	5.62	5	1104	>sp|P02817|AMELX_BOVIN Amelogenin, X isoform OS=Bos taurus OX=9913 GN=AMELX PE=1 SV=2	1	hf1_eb_18273_84_20032023.ScanId;v=1;d1=10310.10310.3	controllerType=0 controllerNumber=1 scan=10310	30.1284
10172:3	1	S.MP[+15.995]LPPHPGHPGYIN.F		P[+16]	514.922	3	1542.75	1542.75	0	-0.6	17	Non	378.76	378.76	5.5	6	1104	>sp|P02817|AMELX_BOVIN Amelogenin, X isoform OS=Bos taurus OX=9913 GN=AMELX PE=1 SV=2	1	hf1_eb_18273_84_20032023.ScanId;v=1;d1=10489.10489.3	controllerType=0 controllerNumber=1 scan=10489	30.4716
10304:2	1	S.M[+15.995]PLPPHPGHPGYIN.F		M[+16]	771.879	2	1542.75	1542.75	0	-0.8	17	Non	383.75	383.75	35.05	7.02	1104	>sp|P02817|AMELX_BOVIN Amelogenin, X isoform OS=Bos taurus OX=9913 GN=AMELX PE=1 SV=2	1	hf1_eb_18273_84_20032023.ScanId;v=1;d1=10588.10588.2	controllerType=0 controllerNumber=1 scan=10588	30.6511
14817:3	1	S.MPLPPHPGHPGYIN[+0.984].F		N[+1]	509.917	3	1527.74	1527.74	0	-3.2	17	Non	400.37	346.19	346.19	4.85	1104	>sp|P02817|AMELX_BOVIN Amelogenin, X isoform OS=Bos taurus OX=9913 GN=AMELX PE=1 SV=2	1	hf1_eb_18273_84_20032023.ScanId;v=1;d1=13876.13876.3	controllerType=0 controllerNumber=1 scan=13876	36.6678
15356:2	1	S.MPLPPHPGHPGYIN[+0.984].F		N[+1]	764.372	2	1527.74	1527.74	0	-2.7	17	Non	403.14	330.59	330.59	5.28	1104	>sp|P02817|AMELX_BOVIN Amelogenin, X isoform OS=Bos taurus OX=9913 GN=AMELX PE=1 SV=2	1	hf1_eb_18273_84_20032023.ScanId;v=1;d1=14264.14264.2	controllerType=0 controllerNumber=1 scan=14264	37.3832
10680:3	1	S.MP[+15.995]LPPHPGHPGYIN.F		P[+16]	514.922	3	1542.75	1542.75	0	0.1	17	Non	404.01	404.01	4	6.01	1104	>sp|P02817|AMELX_BOVIN Amelogenin, X isoform OS=Bos taurus OX=9913 GN=AMELX PE=1 SV=2	1	hf1_eb_18273_84_20032023.ScanId;v=1;d1=10862.10862.3	controllerType=0 controllerNumber=1 scan=10862	31.1516
15034:2	1	S.MPLPPHPGHPGYIN[+0.984].F		N[+1]	764.374	2	1527.74	1527.74	0	-0.5	17	Non	417.68	318.75	318.75	5.41	1104	>sp|P02817|AMELX_BOVIN Amelogenin, X isoform OS=Bos taurus OX=9913 GN=AMELX PE=1 SV=2	1	hf1_eb_18273_84_20032023.ScanId;v=1;d1=14029.14029.2	controllerType=0 controllerNumber=1 scan=14029	36.9537
10418:3	1	S.MP[+15.995]LPPHPGHPGYIN.F		P[+16]	514.922	3	1542.75	1542.75	0	0.1	17	Non	428.56	428.56	4	6.24	1104	>sp|P02817|AMELX_BOVIN Amelogenin, X isoform OS=Bos taurus OX=9913 GN=AMELX PE=1 SV=2	1	hf1_eb_18273_84_20032023.ScanId;v=1;d1=10675.10675.3	controllerType=0 controllerNumber=1 scan=10675	30.8133
15599:3	1	S.MPLPPHPGHPGYIN[+0.984].F		N[+1]	509.918	3	1527.74	1527.74	0	-0.8	17	Non	511.69	491.05	491.05	6	1104	>sp|P02817|AMELX_BOVIN Amelogenin, X isoform OS=Bos taurus OX=9913 GN=AMELX PE=1 SV=2	1	hf1_eb_18273_84_20032023.ScanId;v=1;d1=14441.14441.3	controllerType=0 controllerNumber=1 scan=14441	37.714
15067:3	1	S.MPLPPHPGHPGYIN[+0.984].F		N[+1]	509.918	3	1527.74	1527.74	0	-1.6	17	Non	541.69	531.1	531.1	6.53	1104	>sp|P02817|AMELX_BOVIN Amelogenin, X isoform OS=Bos taurus OX=9913 GN=AMELX PE=1 SV=2	1	hf1_eb_18273_84_20032023.ScanId;v=1;d1=14056.14056.3	controllerType=0 controllerNumber=1 scan=14056	37.0046
15338:3	1	S.MPLPPHPGHPGYIN[+0.984].F		N[+1]	509.918	3	1527.74	1527.74	0	-1.6	17	Non	564.49	526.16	526.16	6.5	1104	>sp|P02817|AMELX_BOVIN Amelogenin, X isoform OS=Bos taurus OX=9913 GN=AMELX PE=1 SV=2	1	hf1_eb_18273_84_20032023.ScanId;v=1;d1=14250.14250.3	controllerType=0 controllerNumber=1 scan=14250	37.3572
11557:3	1	S.MP[+15.995]LPPHPGHPGYIN[+0.984].F		N[+1], P[+16]	515.25	3	1543.73	1543.74	0	-1.2	17	Non	127.39	127.39	4	1.44	1104	>sp|P02817|AMELX_BOVIN Amelogenin, X isoform OS=Bos taurus OX=9913 GN=AMELX PE=1 SV=2	1	hf1_eb_18273_84_20032023.ScanId;v=1;d1=11518.11518.2	controllerType=0 controllerNumber=1 scan=11518	32.3678
12959:3	1	S.MP[+15.995]LPPHPGHPGYIN[+0.984].F		N[+1], P[+16]	515.25	3	1543.74	1543.74	0	0.2	17	Non	170.8	170.8	5.8	1.42	1104	>sp|P02817|AMELX_BOVIN Amelogenin, X isoform OS=Bos taurus OX=9913 GN=AMELX PE=1 SV=2	1	hf1_eb_18273_84_20032023.ScanId;v=1;d1=12534.12534.2	controllerType=0 controllerNumber=1 scan=12534	34.2351
12172:3	1	S.M[+31.990]PLPPHPGHPGYIN[+0.984].F		M[+32], N[+1]	520.581	3	1559.73	1559.73	0	-0.9	17	Non	216.77	216.77	10.89	2.97	1104	>sp|P02817|AMELX_BOVIN Amelogenin, X isoform OS=Bos taurus OX=9913 GN=AMELX PE=1 SV=2	1	hf1_eb_18273_84_20032023.ScanId;v=1;d1=11971.11971.3	controllerType=0 controllerNumber=1 scan=11971	33.2022
12523:2	1	S.MP[+31.990]LPPHPGHPGYIN[+0.984].F		N[+1], P[+32]	780.362	2	1559.72	1559.73	0	-9.2	17	Non	232.15	232.15	11.89	1.36	1104	>sp|P02817|AMELX_BOVIN Amelogenin, X isoform OS=Bos taurus OX=9913 GN=AMELX PE=1 SV=2	1	hf1_eb_18273_84_20032023.ScanId;v=1;d1=12225.12225.2	controllerType=0 controllerNumber=1 scan=12225	33.6771
12454:2	1	S.MP[+15.995]LPPHPGHPGYIN[+0.984].F		N[+1], P[+16]	772.372	2	1543.74	1543.74	0	1	17	Non	246.1	246.1	4	4.48	1104	>sp|P02817|AMELX_BOVIN Amelogenin, X isoform OS=Bos taurus OX=9913 GN=AMELX PE=1 SV=2	1	hf1_eb_18273_84_20032023.ScanId;v=1;d1=12176.12176.2	controllerType=0 controllerNumber=1 scan=12176	33.584
12630:3	1	S.M[+31.990]PLPPHPGHPGYIN[+0.984].F		M[+32], N[+1]	520.582	3	1559.73	1559.73	0	0.5	17	Non	295.46	295.46	11.94	4.55	1104	>sp|P02817|AMELX_BOVIN Amelogenin, X isoform OS=Bos taurus OX=9913 GN=AMELX PE=1 SV=2	1	hf1_eb_18273_84_20032023.ScanId;v=1;d1=12295.12295.3	controllerType=0 controllerNumber=1 scan=12295	33.7974
12948:3	1	S.M[+31.990]PLPPHPGHPGYIN[+0.984].F		M[+32], N[+1]	520.582	3	1559.73	1559.73	0	-0.6	17	Non	301.83	301.83	8.52	4.89	1104	>sp|P02817|AMELX_BOVIN Amelogenin, X isoform OS=Bos taurus OX=9913 GN=AMELX PE=1 SV=2	1	hf1_eb_18273_84_20032023.ScanId;v=1;d1=12526.12526.3	controllerType=0 controllerNumber=1 scan=12526	34.2205
12691:3	1	S.M[+31.990]PLPPHPGHPGYIN[+0.984].F		M[+32], N[+1]	520.582	3	1559.73	1559.73	0	-0.1	17	Non	337.11	337.11	8.73	5	1104	>sp|P02817|AMELX_BOVIN Amelogenin, X isoform OS=Bos taurus OX=9913 GN=AMELX PE=1 SV=2	1	hf1_eb_18273_84_20032023.ScanId;v=1;d1=12340.12340.3	controllerType=0 controllerNumber=1 scan=12340	33.8791
10684:2	1	S.M[+15.995]PLPPHPGHPGYIN[+0.984].F		M[+16], N[+1]	772.372	2	1543.74	1543.74	0	-0.2	17	Non	398.17	369.36	12.2	6.32	1104	>sp|P02817|AMELX_BOVIN Amelogenin, X isoform OS=Bos taurus OX=9913 GN=AMELX PE=1 SV=2	1	hf1_eb_18273_84_20032023.ScanId;v=1;d1=10865.10865.2	controllerType=0 controllerNumber=1 scan=10865	31.1589
10681:3	1	S.MP[+15.995]LPPHPGHPGYIN[+0.984].F		N[+1], P[+16]	515.249	3	1543.73	1543.74	0	-3	17	Non	426.05	426.05	4	5.8	1104	>sp|P02817|AMELX_BOVIN Amelogenin, X isoform OS=Bos taurus OX=9913 GN=AMELX PE=1 SV=2	1	hf1_eb_18273_84_20032023.ScanId;v=1;d1=10862.10862.3	controllerType=0 controllerNumber=1 scan=10862	31.1516
12190:2	1	S.M[+15.995]PLPPHPGHPGYIN[+0.984].F		M[+16], N[+1]	772.372	2	1543.74	1543.74	0	0.8	17	Non	469.12	422.13	36.31	6.25	1104	>sp|P02817|AMELX_BOVIN Amelogenin, X isoform OS=Bos taurus OX=9913 GN=AMELX PE=1 SV=2	1	hf1_eb_18273_84_20032023.ScanId;v=1;d1=11986.11986.2	controllerType=0 controllerNumber=1 scan=11986	33.2295
12425:3	1	S.M[+15.995]PLPPHPGHPGYIN[+0.984].F		M[+16], N[+1]	515.25	3	1543.74	1543.74	0	0.1	17	Non	470.85	470.85	1.78	6.74	1104	>sp|P02817|AMELX_BOVIN Amelogenin, X isoform OS=Bos taurus OX=9913 GN=AMELX PE=1 SV=2	1	hf1_eb_18273_84_20032023.ScanId;v=1;d1=12157.12157.3	controllerType=0 controllerNumber=1 scan=12157	33.5515
11426:3	1	S.M[+15.995]PLPPHPGHPGYIN[+0.984].F		M[+16], N[+1]	515.25	3	1543.73	1543.74	0	-1.6	17	Non	499.1	499.1	7.66	6.48	1104	>sp|P02817|AMELX_BOVIN Amelogenin, X isoform OS=Bos taurus OX=9913 GN=AMELX PE=1 SV=2	1	hf1_eb_18273_84_20032023.ScanId;v=1;d1=11422.11422.3	controllerType=0 controllerNumber=1 scan=11422	32.1845
10936:3	1	S.M[+15.995]PLPPHPGHPGYIN[+0.984].F		M[+16], N[+1]	515.25	3	1543.74	1543.74	0	0.1	17	Non	526.13	526.13	2.27	6.75	1104	>sp|P02817|AMELX_BOVIN Amelogenin, X isoform OS=Bos taurus OX=9913 GN=AMELX PE=1 SV=2	1	hf1_eb_18273_84_20032023.ScanId;v=1;d1=11053.11053.3	controllerType=0 controllerNumber=1 scan=11053	31.4952
11179:3	1	S.MP[+15.995]LPPHPGHPGYIN[+0.984].F		N[+1], P[+16]	515.25	3	1543.74	1543.74	0	0	17	Non	526.28	526.28	4	6.75	1104	>sp|P02817|AMELX_BOVIN Amelogenin, X isoform OS=Bos taurus OX=9913 GN=AMELX PE=1 SV=2	1	hf1_eb_18273_84_20032023.ScanId;v=1;d1=11240.11240.3	controllerType=0 controllerNumber=1 scan=11240	31.8388
11680:3	1	S.M[+15.995]PLPPHPGHPGYIN[+0.984].F		M[+16], N[+1]	515.25	3	1543.73	1543.74	0	-1.4	17	Non	530.15	530.15	6.66	6.75	1104	>sp|P02817|AMELX_BOVIN Amelogenin, X isoform OS=Bos taurus OX=9913 GN=AMELX PE=1 SV=2	1	hf1_eb_18273_84_20032023.ScanId;v=1;d1=11607.11607.3	controllerType=0 controllerNumber=1 scan=11607	32.5329
11924:3	1	S.M[+15.995]PLPPHPGHPGYIN[+0.984].F		M[+16], N[+1]	515.25	3	1543.74	1543.74	0	-0.7	17	Non	534.35	534.35	6.41	6.75	1104	>sp|P02817|AMELX_BOVIN Amelogenin, X isoform OS=Bos taurus OX=9913 GN=AMELX PE=1 SV=2	1	hf1_eb_18273_84_20032023.ScanId;v=1;d1=11790.11790.3	controllerType=0 controllerNumber=1 scan=11790	32.8765
12180:3	1	S.M[+15.995]PLPPHPGHPGYIN[+0.984].F		M[+16], N[+1]	515.25	3	1543.74	1543.74	0	-0.3	17	Non	541.19	541.19	9.32	6.75	1104	>sp|P02817|AMELX_BOVIN Amelogenin, X isoform OS=Bos taurus OX=9913 GN=AMELX PE=1 SV=2	1	hf1_eb_18273_84_20032023.ScanId;v=1;d1=11977.11977.3	controllerType=0 controllerNumber=1 scan=11977	33.2139
11427:2	1	S.M[+15.995]PLPPHPGHPGYIN[+0.984].F		M[+16], N[+1]	772.37	2	1543.73	1543.74	0	-2	17	Non	595.48	591.32	55.83	7.05	1104	>sp|P02817|AMELX_BOVIN Amelogenin, X isoform OS=Bos taurus OX=9913 GN=AMELX PE=1 SV=2	1	hf1_eb_18273_84_20032023.ScanId;v=1;d1=11423.11423.2	controllerType=0 controllerNumber=1 scan=11423	32.1854
11183:2	1	S.M[+15.995]PLPPHPGHPGYIN[+0.984].F		M[+16], N[+1]	772.371	2	1543.73	1543.74	0	-1.2	17	Non	600.72	598.96	60.35	8.26	1104	>sp|P02817|AMELX_BOVIN Amelogenin, X isoform OS=Bos taurus OX=9913 GN=AMELX PE=1 SV=2	1	hf1_eb_18273_84_20032023.ScanId;v=1;d1=11245.11245.2	controllerType=0 controllerNumber=1 scan=11245	31.849
11925:2	1	S.M[+15.995]PLPPHPGHPGYIN[+0.984].F		M[+16], N[+1]	772.371	2	1543.74	1543.74	0	-0.6	17	Non	601.12	521.35	62.48	8.26	1104	>sp|P02817|AMELX_BOVIN Amelogenin, X isoform OS=Bos taurus OX=9913 GN=AMELX PE=1 SV=2	1	hf1_eb_18273_84_20032023.ScanId;v=1;d1=11791.11791.2	controllerType=0 controllerNumber=1 scan=11791	32.8781
10950:2	1	S.M[+15.995]PLPPHPGHPGYIN[+0.984].F		M[+16], N[+1]	772.371	2	1543.74	1543.74	0	-0.4	17	Non	616.7	550.2	56.04	8.26	1104	>sp|P02817|AMELX_BOVIN Amelogenin, X isoform OS=Bos taurus OX=9913 GN=AMELX PE=1 SV=2	1	hf1_eb_18273_84_20032023.ScanId;v=1;d1=11062.11062.2	controllerType=0 controllerNumber=1 scan=11062	31.511
11681:2	1	S.M[+15.995]PLPPHPGHPGYIN[+0.984].F		M[+16], N[+1]	772.371	2	1543.73	1543.74	0	-1.5	17	Non	620.69	606.54	64.01	8.04	1104	>sp|P02817|AMELX_BOVIN Amelogenin, X isoform OS=Bos taurus OX=9913 GN=AMELX PE=1 SV=2	1	hf1_eb_18273_84_20032023.ScanId;v=1;d1=11608.11608.2	controllerType=0 controllerNumber=1 scan=11608	32.5344
17681:3	1	S.MP[+15.995]LPPHPGHPGYINF.S		P[+16]	563.944	3	1689.82	1689.82	0	-2	17	Non	189.85	189.85	4	2.47	1104	>sp|P02817|AMELX_BOVIN Amelogenin, X isoform OS=Bos taurus OX=9913 GN=AMELX PE=1 SV=2	1	hf1_eb_18273_84_20032023.ScanId;v=1;d1=15968.15968.3	controllerType=0 controllerNumber=1 scan=15968	40.3999
23248:3	1	S.MPLPPHPGHPGYIN[+0.984]F.S		N[+1]	558.941	3	1674.81	1674.81	0	-1.2	17	Non	213.16	213.16	213.16	2.97	1104	>sp|P02817|AMELX_BOVIN Amelogenin, X isoform OS=Bos taurus OX=9913 GN=AMELX PE=1 SV=2	1	hf1_eb_18273_84_20032023.ScanId;v=1;d1=20005.20005.3	controllerType=0 controllerNumber=1 scan=20005	47.6624
17190:3	1	S.MP[+15.995]LPPHPGHPGYINF.S		P[+16]	563.944	3	1689.82	1689.82	0	-1.2	17	Non	220.3	220.3	4	2.97	1104	>sp|P02817|AMELX_BOVIN Amelogenin, X isoform OS=Bos taurus OX=9913 GN=AMELX PE=1 SV=2	1	hf1_eb_18273_84_20032023.ScanId;v=1;d1=15588.15588.3	controllerType=0 controllerNumber=1 scan=15588	39.7104
19458:3	1	S.M[+31.990]PLPPHPGHPGYINF.S		M[+32]	569.276	3	1705.81	1705.82	0	-1.4	17	Non	221.65	218.1	8.31	2.97	1104	>sp|P02817|AMELX_BOVIN Amelogenin, X isoform OS=Bos taurus OX=9913 GN=AMELX PE=1 SV=2	1	hf1_eb_18273_84_20032023.ScanId;v=1;d1=17283.17283.3	controllerType=0 controllerNumber=1 scan=17283	42.7736
17922:3	1	S.MP[+15.995]LPPHPGHPGYINF.S		P[+16]	563.944	3	1689.82	1689.82	0	-1.5	17	Non	275.6	275.6	4	4.39	1104	>sp|P02817|AMELX_BOVIN Amelogenin, X isoform OS=Bos taurus OX=9913 GN=AMELX PE=1 SV=2	1	hf1_eb_18273_84_20032023.ScanId;v=1;d1=16156.16156.3	controllerType=0 controllerNumber=1 scan=16156	40.7403
17455:3	1	S.MP[+15.995]LPPHPGHPGYINF.S		P[+16]	563.944	3	1689.82	1689.82	0	-2.3	17	Non	293.37	293.37	4	4.67	1104	>sp|P02817|AMELX_BOVIN Amelogenin, X isoform OS=Bos taurus OX=9913 GN=AMELX PE=1 SV=2	1	hf1_eb_18273_84_20032023.ScanId;v=1;d1=15783.15783.3	controllerType=0 controllerNumber=1 scan=15783	40.0555
15866:3	1	S.MP[+15.995]LPPHPGHPGYINF.S		P[+16]	563.945	3	1689.82	1689.82	0	-0.3	17	Non	300.38	292.31	4	4.56	1104	>sp|P02817|AMELX_BOVIN Amelogenin, X isoform OS=Bos taurus OX=9913 GN=AMELX PE=1 SV=2	1	hf1_eb_18273_84_20032023.ScanId;v=1;d1=14632.14632.3	controllerType=0 controllerNumber=1 scan=14632	38.0411
18166:3	1	S.MP[+15.995]LPPHPGHPGYINF.S		P[+16]	563.945	3	1689.82	1689.82	0	-0.8	17	Non	300.64	300.64	4	5	1104	>sp|P02817|AMELX_BOVIN Amelogenin, X isoform OS=Bos taurus OX=9913 GN=AMELX PE=1 SV=2	1	hf1_eb_18273_84_20032023.ScanId;v=1;d1=16347.16347.3	controllerType=0 controllerNumber=1 scan=16347	41.0897
19710:3	1	S.M[+31.990]PLPPHPGHPGYINF.S		M[+32]	569.277	3	1705.82	1705.82	0	-0.2	17	Non	305.82	305.82	8.35	4.89	1104	>sp|P02817|AMELX_BOVIN Amelogenin, X isoform OS=Bos taurus OX=9913 GN=AMELX PE=1 SV=2	1	hf1_eb_18273_84_20032023.ScanId;v=1;d1=17469.17469.3	controllerType=0 controllerNumber=1 scan=17469	43.1134
16907:3	1	S.MP[+15.995]LPPHPGHPGYINF.S		P[+16]	563.944	3	1689.82	1689.82	0	-1.5	17	Non	322.7	322.7	4	5.11	1104	>sp|P02817|AMELX_BOVIN Amelogenin, X isoform OS=Bos taurus OX=9913 GN=AMELX PE=1 SV=2	1	hf1_eb_18273_84_20032023.ScanId;v=1;d1=15386.15386.3	controllerType=0 controllerNumber=1 scan=15386	39.3643
21868:3	1	S.MPLPPHPGHPGYIN[+0.984]F.S		N[+1]	558.939	3	1674.8	1674.81	0	-4	17	Non	330.66	236.09	236.09	3.8	1104	>sp|P02817|AMELX_BOVIN Amelogenin, X isoform OS=Bos taurus OX=9913 GN=AMELX PE=1 SV=2	1	hf1_eb_18273_84_20032023.ScanId;v=1;d1=19032.19032.3	controllerType=0 controllerNumber=1 scan=19032	45.9355
22144:3	1	S.MPLPPHPGHPGYIN[+0.984]F.S		N[+1]	558.94	3	1674.81	1674.81	0	-2.1	17	Non	414.04	414.04	414.04	5.8	1104	>sp|P02817|AMELX_BOVIN Amelogenin, X isoform OS=Bos taurus OX=9913 GN=AMELX PE=1 SV=2	1	hf1_eb_18273_84_20032023.ScanId;v=1;d1=19229.19229.3	controllerType=0 controllerNumber=1 scan=19229	46.2887
22967:3	1	S.MPLPPHPGHPGYIN[+0.984]F.S		N[+1]	558.941	3	1674.81	1674.81	0	-1.2	17	Non	439.05	439.05	439.05	6.01	1104	>sp|P02817|AMELX_BOVIN Amelogenin, X isoform OS=Bos taurus OX=9913 GN=AMELX PE=1 SV=2	1	hf1_eb_18273_84_20032023.ScanId;v=1;d1=19812.19812.3	controllerType=0 controllerNumber=1 scan=19812	47.3219
22405:3	1	S.MPLPPHPGHPGYIN[+0.984]F.S		N[+1]	558.942	3	1674.81	1674.81	0	0.4	17	Non	440.17	440.17	440.17	5.93	1104	>sp|P02817|AMELX_BOVIN Amelogenin, X isoform OS=Bos taurus OX=9913 GN=AMELX PE=1 SV=2	1	hf1_eb_18273_84_20032023.ScanId;v=1;d1=19419.19419.3	controllerType=0 controllerNumber=1 scan=19419	46.6251
17566:2	1	S.M[+15.995]PLPPHPGHPGYINF.S		M[+16]	845.413	2	1689.82	1689.82	0	-0.9	17	Non	465.72	403.1	28.52	6.3	1104	>sp|P02817|AMELX_BOVIN Amelogenin, X isoform OS=Bos taurus OX=9913 GN=AMELX PE=1 SV=2	1	hf1_eb_18273_84_20032023.ScanId;v=1;d1=15868.15868.2	controllerType=0 controllerNumber=1 scan=15868	40.2122
17312:2	1	S.M[+15.995]PLPPHPGHPGYINF.S		M[+16]	845.412	2	1689.82	1689.82	0	-1.8	17	Non	466.18	412.5	27.9	6.08	1104	>sp|P02817|AMELX_BOVIN Amelogenin, X isoform OS=Bos taurus OX=9913 GN=AMELX PE=1 SV=2	1	hf1_eb_18273_84_20032023.ScanId;v=1;d1=15678.15678.2	controllerType=0 controllerNumber=1 scan=15678	39.8682
17796:2	1	S.M[+15.995]PLPPHPGHPGYINF.S		M[+16]	845.412	2	1689.82	1689.82	0	-1.8	17	Non	489.33	419.29	40.45	6.05	1104	>sp|P02817|AMELX_BOVIN Amelogenin, X isoform OS=Bos taurus OX=9913 GN=AMELX PE=1 SV=2	1	hf1_eb_18273_84_20032023.ScanId;v=1;d1=16057.16057.2	controllerType=0 controllerNumber=1 scan=16057	40.5608
22689:3	1	S.MPLPPHPGHPGYIN[+0.984]F.S		N[+1]	558.942	3	1674.81	1674.81	0	1.4	17	Non	498.11	498.11	498.11	5.89	1104	>sp|P02817|AMELX_BOVIN Amelogenin, X isoform OS=Bos taurus OX=9913 GN=AMELX PE=1 SV=2	1	hf1_eb_18273_84_20032023.ScanId;v=1;d1=19617.19617.3	controllerType=0 controllerNumber=1 scan=19617	46.9682
18314:2	1	S.M[+15.995]PLPPHPGHPGYINF.S		M[+16]	845.414	2	1689.82	1689.82	0	0.2	17	Non	540.07	476.97	42.63	6.37	1104	>sp|P02817|AMELX_BOVIN Amelogenin, X isoform OS=Bos taurus OX=9913 GN=AMELX PE=1 SV=2	1	hf1_eb_18273_84_20032023.ScanId;v=1;d1=16449.16449.2	controllerType=0 controllerNumber=1 scan=16449	41.2755
22322:2	1	S.MPLPPHPGHPGYIN[+0.984]F.S		N[+1]	837.909	2	1674.81	1674.81	0	0	17	Non	544.75	538.72	538.72	6.6	1104	>sp|P02817|AMELX_BOVIN Amelogenin, X isoform OS=Bos taurus OX=9913 GN=AMELX PE=1 SV=2	1	hf1_eb_18273_84_20032023.ScanId;v=1;d1=19357.19357.2	controllerType=0 controllerNumber=1 scan=19357	46.5106
22595:2	1	S.MPLPPHPGHPGYIN[+0.984]F.S		N[+1]	837.91	2	1674.81	1674.81	0	1.3	17	Non	582.49	553.01	553.01	7.4	1104	>sp|P02817|AMELX_BOVIN Amelogenin, X isoform OS=Bos taurus OX=9913 GN=AMELX PE=1 SV=2	1	hf1_eb_18273_84_20032023.ScanId;v=1;d1=19554.19554.2	controllerType=0 controllerNumber=1 scan=19554	46.8569
18036:2	1	S.M[+15.995]PLPPHPGHPGYINF.S		M[+16]	845.412	2	1689.82	1689.82	0	-2	17	Non	586.9	510.47	57.01	6.82	1104	>sp|P02817|AMELX_BOVIN Amelogenin, X isoform OS=Bos taurus OX=9913 GN=AMELX PE=1 SV=2	1	hf1_eb_18273_84_20032023.ScanId;v=1;d1=16245.16245.2	controllerType=0 controllerNumber=1 scan=16245	40.9047
19525:3	1	S.MP[+15.995]LPPHPGHPGYIN[+0.984]F.S		N[+1], P[+16]	564.273	3	1690.81	1690.8	0	0.3	17	Non	139.04	139.04	4	1.44	1104	>sp|P02817|AMELX_BOVIN Amelogenin, X isoform OS=Bos taurus OX=9913 GN=AMELX PE=1 SV=2	1	hf1_eb_18273_84_20032023.ScanId;v=1;d1=17332.17332.3	controllerType=0 controllerNumber=1 scan=17332	42.8603
22376:3	1	S.MP[+15.995]LPPHPGHPGYIN[+0.984]F.S		N[+1], P[+16]	564.272	3	1690.8	1690.8	0	-1.8	17	Non	212.15	209.27	4	2.33	1104	>sp|P02817|AMELX_BOVIN Amelogenin, X isoform OS=Bos taurus OX=9913 GN=AMELX PE=1 SV=2	1	hf1_eb_18273_84_20032023.ScanId;v=1;d1=19397.19397.3	controllerType=0 controllerNumber=1 scan=19397	46.5822
17123:3	1	S.M[+31.990]PLPPHPGHPGYIN[+0.984]F.S		M[+32], N[+1]	569.603	3	1706.79	1706.8	0	-3.5	17	Non	222.1	176.18	8.32	1.13	1104	>sp|P02817|AMELX_BOVIN Amelogenin, X isoform OS=Bos taurus OX=9913 GN=AMELX PE=1 SV=2	1	hf1_eb_18273_84_20032023.ScanId;v=1;d1=15539.15539.2	controllerType=0 controllerNumber=1 scan=15539	39.6274
17137:3	1	S.M[+31.990]PLPPHPGHPGYIN[+0.984]F.S		M[+32], N[+1]	569.602	3	1706.79	1706.8	0	-3.8	17	Non	235.15	168.81	16.06	1.67	1104	>sp|P02817|AMELX_BOVIN Amelogenin, X isoform OS=Bos taurus OX=9913 GN=AMELX PE=1 SV=2	1	hf1_eb_18273_84_20032023.ScanId;v=1;d1=15550.15550.3	controllerType=0 controllerNumber=1 scan=15550	39.6445
18396:3	1	S.M[+31.990]PLPPHPGHPGYIN[+0.984]F.S		M[+32], N[+1]	569.604	3	1706.8	1706.8	0	-1.8	17	Non	250.3	235.61	0	3.81	1104	>sp|P02817|AMELX_BOVIN Amelogenin, X isoform OS=Bos taurus OX=9913 GN=AMELX PE=1 SV=2	1	hf1_eb_18273_84_20032023.ScanId;v=1;d1=16506.16506.3	controllerType=0 controllerNumber=1 scan=16506	41.3756
21279:3	1	S.MP[+15.995]LPPHPGHPGYIN[+0.984]F.S		N[+1], P[+16]	564.273	3	1690.8	1690.8	0	-0.2	17	Non	259.69	259.69	5.8	3.47	1104	>sp|P02817|AMELX_BOVIN Amelogenin, X isoform OS=Bos taurus OX=9913 GN=AMELX PE=1 SV=2	1	hf1_eb_18273_84_20032023.ScanId;v=1;d1=18620.18620.3	controllerType=0 controllerNumber=1 scan=18620	45.2139
18268:2	1	S.M[+31.990]PLPPHPGHPGYIN[+0.984]F.S		M[+32], N[+1]	853.903	2	1706.8	1706.8	0	-0.7	17	Non	266.91	240.09	0	4.35	1104	>sp|P02817|AMELX_BOVIN Amelogenin, X isoform OS=Bos taurus OX=9913 GN=AMELX PE=1 SV=2	1	hf1_eb_18273_84_20032023.ScanId;v=1;d1=16417.16417.2	controllerType=0 controllerNumber=1 scan=16417	41.2146
20995:3	1	S.MP[+15.995]LPPHPGHPGYIN[+0.984]F.S		N[+1], P[+16]	564.273	3	1690.8	1690.8	0	-0.1	17	Non	287.16	287.16	4	4.56	1104	>sp|P02817|AMELX_BOVIN Amelogenin, X isoform OS=Bos taurus OX=9913 GN=AMELX PE=1 SV=2	1	hf1_eb_18273_84_20032023.ScanId;v=1;d1=18413.18413.3	controllerType=0 controllerNumber=1 scan=18413	44.8333
21265:3	1	S.M[+31.990]PLPPHPGHPGYIN[+0.984]F.S		M[+32], N[+1]	569.604	3	1706.8	1706.8	0	-1.5	17	Non	291.95	284.72	0	4.67	1104	>sp|P02817|AMELX_BOVIN Amelogenin, X isoform OS=Bos taurus OX=9913 GN=AMELX PE=1 SV=2	1	hf1_eb_18273_84_20032023.ScanId;v=1;d1=18609.18609.3	controllerType=0 controllerNumber=1 scan=18609	45.1932
18651:3	1	S.M[+31.990]PLPPHPGHPGYIN[+0.984]F.S		M[+32], N[+1]	569.603	3	1706.8	1706.8	0	-2.4	17	Non	297.38	250.59	8.08	4.2	1104	>sp|P02817|AMELX_BOVIN Amelogenin, X isoform OS=Bos taurus OX=9913 GN=AMELX PE=1 SV=2	1	hf1_eb_18273_84_20032023.ScanId;v=1;d1=16694.16694.3	controllerType=0 controllerNumber=1 scan=16694	41.7131
19177:3	1	S.M[+31.990]PLPPHPGHPGYIN[+0.984]F.S		M[+32], N[+1]	569.602	3	1706.79	1706.8	0	-3.9	17	Non	301.72	288.83	11.38	3.85	1104	>sp|P02817|AMELX_BOVIN Amelogenin, X isoform OS=Bos taurus OX=9913 GN=AMELX PE=1 SV=2	1	hf1_eb_18273_84_20032023.ScanId;v=1;d1=17080.17080.3	controllerType=0 controllerNumber=1 scan=17080	42.4057
20370:2	1	S.M[+15.995]PLPPHPGHPGYIN[+0.984]F.S		M[+16], N[+1]	845.907	2	1690.81	1690.8	0	1.6	17	Non	313.89	301.83	30.79	4.87	1104	>sp|P02817|AMELX_BOVIN Amelogenin, X isoform OS=Bos taurus OX=9913 GN=AMELX PE=1 SV=2	1	hf1_eb_18273_84_20032023.ScanId;v=1;d1=17972.17972.2	controllerType=0 controllerNumber=1 scan=17972	44.0538
20802:3	1	S.M[+15.995]PLPPHPGHPGYIN[+0.984]F.S		M[+16], N[+1]	564.273	3	1690.8	1690.8	0	-0.6	17	Non	321.11	321.11	2.49	5	1104	>sp|P02817|AMELX_BOVIN Amelogenin, X isoform OS=Bos taurus OX=9913 GN=AMELX PE=1 SV=2	1	hf1_eb_18273_84_20032023.ScanId;v=1;d1=18276.18276.3	controllerType=0 controllerNumber=1 scan=18276	44.5906
20997:3	1	S.M[+31.990]PLPPHPGHPGYIN[+0.984]F.S		M[+32], N[+1]	569.604	3	1706.8	1706.8	0	-1.1	17	Non	333.63	310.66	9.37	4.91	1104	>sp|P02817|AMELX_BOVIN Amelogenin, X isoform OS=Bos taurus OX=9913 GN=AMELX PE=1 SV=2	1	hf1_eb_18273_84_20032023.ScanId;v=1;d1=18414.18414.3	controllerType=0 controllerNumber=1 scan=18414	44.8345
18719:2	1	S.MP[+31.990]LPPHPGHPGYIN[+0.984]F.S		N[+1], P[+32]	853.904	2	1706.8	1706.8	0	0.5	17	Non	340.61	290.35	6.05	4.56	1104	>sp|P02817|AMELX_BOVIN Amelogenin, X isoform OS=Bos taurus OX=9913 GN=AMELX PE=1 SV=2	1	hf1_eb_18273_84_20032023.ScanId;v=1;d1=16745.16745.2	controllerType=0 controllerNumber=1 scan=16745	41.7999
20480:3	1	S.MP[+15.995]LPPHPGHPGYIN[+0.984]F.S		N[+1], P[+16]	564.273	3	1690.8	1690.8	0	-1	17	Non	350.66	350.66	4	5.11	1104	>sp|P02817|AMELX_BOVIN Amelogenin, X isoform OS=Bos taurus OX=9913 GN=AMELX PE=1 SV=2	1	hf1_eb_18273_84_20032023.ScanId;v=1;d1=18051.18051.3	controllerType=0 controllerNumber=1 scan=18051	44.1943
18907:3	1	S.M[+31.990]PLPPHPGHPGYIN[+0.984]F.S		M[+32], N[+1]	569.602	3	1706.79	1706.8	0	-4	17	Non	372.2	370.08	14.44	4.79	1104	>sp|P02817|AMELX_BOVIN Amelogenin, X isoform OS=Bos taurus OX=9913 GN=AMELX PE=1 SV=2	1	hf1_eb_18273_84_20032023.ScanId;v=1;d1=16888.16888.3	controllerType=0 controllerNumber=1 scan=16888	42.0554
19737:3	1	S.MP[+15.995]LPPHPGHPGYIN[+0.984]F.S		N[+1], P[+16]	564.272	3	1690.8	1690.8	0	-2.6	17	Non	373.75	373.75	4	6.01	1104	>sp|P02817|AMELX_BOVIN Amelogenin, X isoform OS=Bos taurus OX=9913 GN=AMELX PE=1 SV=2	1	hf1_eb_18273_84_20032023.ScanId;v=1;d1=17493.17493.3	controllerType=0 controllerNumber=1 scan=17493	43.1629
17682:3	1	S.MP[+15.995]LPPHPGHPGYIN[+0.984]F.S		N[+1], P[+16]	564.272	3	1690.8	1690.8	0	-1.5	17	Non	376.84	376.84	4	6	1104	>sp|P02817|AMELX_BOVIN Amelogenin, X isoform OS=Bos taurus OX=9913 GN=AMELX PE=1 SV=2	1	hf1_eb_18273_84_20032023.ScanId;v=1;d1=15968.15968.3	controllerType=0 controllerNumber=1 scan=15968	40.3999
19494:3	1	S.MP[+15.995]LPPHPGHPGYIN[+0.984]F.S		N[+1], P[+16]	564.273	3	1690.81	1690.8	0	0.3	17	Non	380.16	380.16	4	6	1104	>sp|P02817|AMELX_BOVIN Amelogenin, X isoform OS=Bos taurus OX=9913 GN=AMELX PE=1 SV=2	1	hf1_eb_18273_84_20032023.ScanId;v=1;d1=17308.17308.3	controllerType=0 controllerNumber=1 scan=17308	42.8193
18451:3	1	S.MP[+15.995]LPPHPGHPGYIN[+0.984]F.S		N[+1], P[+16]	564.274	3	1690.81	1690.8	0	1.3	17	Non	384.15	384.15	4	5.66	1104	>sp|P02817|AMELX_BOVIN Amelogenin, X isoform OS=Bos taurus OX=9913 GN=AMELX PE=1 SV=2	1	hf1_eb_18273_84_20032023.ScanId;v=1;d1=16544.16544.3	controllerType=0 controllerNumber=1 scan=16544	41.4412
20721:3	1	S.M[+31.990]PLPPHPGHPGYIN[+0.984]F.S		M[+32], N[+1]	569.605	3	1706.8	1706.8	0	0.3	17	Non	389.79	358.61	11.38	5.16	1104	>sp|P02817|AMELX_BOVIN Amelogenin, X isoform OS=Bos taurus OX=9913 GN=AMELX PE=1 SV=2	1	hf1_eb_18273_84_20032023.ScanId;v=1;d1=18220.18220.3	controllerType=0 controllerNumber=1 scan=18220	44.4912
19226:3	1	S.MP[+15.995]LPPHPGHPGYIN[+0.984]F.S		N[+1], P[+16]	564.273	3	1690.8	1690.8	0	-0.2	17	Non	393.38	393.38	4	5.94	1104	>sp|P02817|AMELX_BOVIN Amelogenin, X isoform OS=Bos taurus OX=9913 GN=AMELX PE=1 SV=2	1	hf1_eb_18273_84_20032023.ScanId;v=1;d1=17115.17115.3	controllerType=0 controllerNumber=1 scan=17115	42.4676
19711:3	1	S.M[+31.990]PLPPHPGHPGYIN[+0.984]F.S		M[+32], N[+1]	569.603	3	1706.79	1706.8	0	-2.9	17	Non	394.4	363.3	8.35	5.62	1104	>sp|P02817|AMELX_BOVIN Amelogenin, X isoform OS=Bos taurus OX=9913 GN=AMELX PE=1 SV=2	1	hf1_eb_18273_84_20032023.ScanId;v=1;d1=17469.17469.3	controllerType=0 controllerNumber=1 scan=17469	43.1134
18704:3	1	S.MP[+15.995]LPPHPGHPGYIN[+0.984]F.S		N[+1], P[+16]	564.274	3	1690.81	1690.8	0	2.1	17	Non	395.61	395.61	4	5.89	1104	>sp|P02817|AMELX_BOVIN Amelogenin, X isoform OS=Bos taurus OX=9913 GN=AMELX PE=1 SV=2	1	hf1_eb_18273_84_20032023.ScanId;v=1;d1=16734.16734.3	controllerType=0 controllerNumber=1 scan=16734	41.7829
19825:2	1	S.M[+31.990]PLPPHPGHPGYIN[+0.984]F.S		M[+32], N[+1]	853.903	2	1706.8	1706.8	0	-1	17	Non	397.2	378.33	0	6.32	1104	>sp|P02817|AMELX_BOVIN Amelogenin, X isoform OS=Bos taurus OX=9913 GN=AMELX PE=1 SV=2	1	hf1_eb_18273_84_20032023.ScanId;v=1;d1=17562.17562.2	controllerType=0 controllerNumber=1 scan=17562	43.2903
18959:3	1	S.MP[+15.995]LPPHPGHPGYIN[+0.984]F.S		N[+1], P[+16]	564.274	3	1690.81	1690.8	0	1.3	17	Non	404.67	404.67	4	5.9	1104	>sp|P02817|AMELX_BOVIN Amelogenin, X isoform OS=Bos taurus OX=9913 GN=AMELX PE=1 SV=2	1	hf1_eb_18273_84_20032023.ScanId;v=1;d1=16925.16925.3	controllerType=0 controllerNumber=1 scan=16925	42.1229
20211:3	1	S.MP[+15.995]LPPHPGHPGYIN[+0.984]F.S		N[+1], P[+16]	564.272	3	1690.8	1690.8	0	-1.2	17	Non	417.14	417.14	4	6.01	1104	>sp|P02817|AMELX_BOVIN Amelogenin, X isoform OS=Bos taurus OX=9913 GN=AMELX PE=1 SV=2	1	hf1_eb_18273_84_20032023.ScanId;v=1;d1=17857.17857.3	controllerType=0 controllerNumber=1 scan=17857	43.8454
19926:3	1	S.M[+31.990]PLPPHPGHPGYIN[+0.984]F.S		M[+32], N[+1]	569.603	3	1706.8	1706.8	0	-2.5	17	Non	421.52	406.67	12.18	6.02	1104	>sp|P02817|AMELX_BOVIN Amelogenin, X isoform OS=Bos taurus OX=9913 GN=AMELX PE=1 SV=2	1	hf1_eb_18273_84_20032023.ScanId;v=1;d1=17646.17646.3	controllerType=0 controllerNumber=1 scan=17646	43.4568
17923:3	1	S.MP[+15.995]LPPHPGHPGYIN[+0.984]F.S		N[+1], P[+16]	564.273	3	1690.81	1690.8	0	0.2	17	Non	423.88	423.88	4	6.24	1104	>sp|P02817|AMELX_BOVIN Amelogenin, X isoform OS=Bos taurus OX=9913 GN=AMELX PE=1 SV=2	1	hf1_eb_18273_84_20032023.ScanId;v=1;d1=16156.16156.3	controllerType=0 controllerNumber=1 scan=16156	40.7403
20180:3	1	S.M[+31.990]PLPPHPGHPGYIN[+0.984]F.S		M[+32], N[+1]	569.604	3	1706.8	1706.8	0	-1.1	17	Non	442.86	414.75	14.6	6.27	1104	>sp|P02817|AMELX_BOVIN Amelogenin, X isoform OS=Bos taurus OX=9913 GN=AMELX PE=1 SV=2	1	hf1_eb_18273_84_20032023.ScanId;v=1;d1=17834.17834.3	controllerType=0 controllerNumber=1 scan=17834	43.8027
19959:3	1	S.MP[+15.995]LPPHPGHPGYIN[+0.984]F.S		N[+1], P[+16]	564.272	3	1690.8	1690.8	0	-1.9	17	Non	463.99	463.99	4	6.05	1104	>sp|P02817|AMELX_BOVIN Amelogenin, X isoform OS=Bos taurus OX=9913 GN=AMELX PE=1 SV=2	1	hf1_eb_18273_84_20032023.ScanId;v=1;d1=17672.17672.3	controllerType=0 controllerNumber=1 scan=17672	43.5041
20445:3	1	S.M[+31.990]PLPPHPGHPGYIN[+0.984]F.S		M[+32], N[+1]	569.604	3	1706.8	1706.8	0	-0.5	17	Non	471.22	438.27	13.84	6.27	1104	>sp|P02817|AMELX_BOVIN Amelogenin, X isoform OS=Bos taurus OX=9913 GN=AMELX PE=1 SV=2	1	hf1_eb_18273_84_20032023.ScanId;v=1;d1=18026.18026.3	controllerType=0 controllerNumber=1 scan=18026	44.1526
18847:2	1	S.M[+15.995]PLPPHPGHPGYIN[+0.984]F.S		M[+16], N[+1]	845.905	2	1690.8	1690.8	0	-0.8	17	Non	562.46	539.59	58.06	7.04	1104	>sp|P02817|AMELX_BOVIN Amelogenin, X isoform OS=Bos taurus OX=9913 GN=AMELX PE=1 SV=2	1	hf1_eb_18273_84_20032023.ScanId;v=1;d1=16839.16839.2	controllerType=0 controllerNumber=1 scan=16839	41.9654
20092:2	1	S.M[+15.995]PLPPHPGHPGYIN[+0.984]F.S		M[+16], N[+1]	845.904	2	1690.8	1690.8	0	-2.2	17	Non	566.27	512.19	38.31	6.82	1104	>sp|P02817|AMELX_BOVIN Amelogenin, X isoform OS=Bos taurus OX=9913 GN=AMELX PE=1 SV=2	1	hf1_eb_18273_84_20032023.ScanId;v=1;d1=17771.17771.2	controllerType=0 controllerNumber=1 scan=17771	43.6919
20315:2	1	S.M[+31.990]PLPPHPGHPGYIN[+0.984]F.S		M[+32], N[+1]	853.903	2	1706.8	1706.8	0	0	17	Non	582.09	533.52	0	7.26	1104	>sp|P02817|AMELX_BOVIN Amelogenin, X isoform OS=Bos taurus OX=9913 GN=AMELX PE=1 SV=2	1	hf1_eb_18273_84_20032023.ScanId;v=1;d1=17933.17933.2	controllerType=0 controllerNumber=1 scan=17933	43.9821
18037:2	1	S.M[+15.995]PLPPHPGHPGYIN[+0.984]F.S		M[+16], N[+1]	845.905	2	1690.8	1690.8	0	-1.5	17	Non	588.94	503.06	61.6	6.82	1104	>sp|P02817|AMELX_BOVIN Amelogenin, X isoform OS=Bos taurus OX=9913 GN=AMELX PE=1 SV=2	1	hf1_eb_18273_84_20032023.ScanId;v=1;d1=16245.16245.2	controllerType=0 controllerNumber=1 scan=16245	40.9047
19356:2	1	S.M[+15.995]PLPPHPGHPGYIN[+0.984]F.S		M[+16], N[+1]	845.905	2	1690.8	1690.8	0	-1.4	17	Non	614.71	552.08	69.32	8.04	1104	>sp|P02817|AMELX_BOVIN Amelogenin, X isoform OS=Bos taurus OX=9913 GN=AMELX PE=1 SV=2	1	hf1_eb_18273_84_20032023.ScanId;v=1;d1=17213.17213.2	controllerType=0 controllerNumber=1 scan=17213	42.6513
18586:2	1	S.M[+15.995]PLPPHPGHPGYIN[+0.984]F.S		M[+16], N[+1]	845.905	2	1690.8	1690.8	0	-0.7	17	Non	614.86	563.65	68.72	8.26	1104	>sp|P02817|AMELX_BOVIN Amelogenin, X isoform OS=Bos taurus OX=9913 GN=AMELX PE=1 SV=2	1	hf1_eb_18273_84_20032023.ScanId;v=1;d1=16640.16640.2	controllerType=0 controllerNumber=1 scan=16640	41.6151
20059:2	1	S.M[+31.990]PLPPHPGHPGYIN[+0.984]F.S		M[+32], N[+1]	853.904	2	1706.8	1706.8	0	0.1	17	Non	625.9	536.81	11.34	8.74	1104	>sp|P02817|AMELX_BOVIN Amelogenin, X isoform OS=Bos taurus OX=9913 GN=AMELX PE=1 SV=2	1	hf1_eb_18273_84_20032023.ScanId;v=1;d1=17745.17745.2	controllerType=0 controllerNumber=1 scan=17745	43.6392
19859:2	1	S.M[+15.995]PLPPHPGHPGYIN[+0.984]F.S		M[+16], N[+1]	845.904	2	1690.8	1690.8	0	-2.5	17	Non	632.67	564.46	49.1	7.82	1104	>sp|P02817|AMELX_BOVIN Amelogenin, X isoform OS=Bos taurus OX=9913 GN=AMELX PE=1 SV=2	1	hf1_eb_18273_84_20032023.ScanId;v=1;d1=17592.17592.2	controllerType=0 controllerNumber=1 scan=17592	43.3507
18315:2	1	S.M[+15.995]PLPPHPGHPGYIN[+0.984]F.S		M[+16], N[+1]	845.906	2	1690.8	1690.8	0	-0.2	17	Non	645.96	542.06	61.37	8.26	1104	>sp|P02817|AMELX_BOVIN Amelogenin, X isoform OS=Bos taurus OX=9913 GN=AMELX PE=1 SV=2	1	hf1_eb_18273_84_20032023.ScanId;v=1;d1=16449.16449.2	controllerType=0 controllerNumber=1 scan=16449	41.2755
19107:2	1	S.M[+15.995]PLPPHPGHPGYIN[+0.984]F.S		M[+16], N[+1]	845.905	2	1690.8	1690.8	0	-0.9	17	Non	651.92	589.38	71.34	9.26	1104	>sp|P02817|AMELX_BOVIN Amelogenin, X isoform OS=Bos taurus OX=9913 GN=AMELX PE=1 SV=2	1	hf1_eb_18273_84_20032023.ScanId;v=1;d1=17028.17028.2	controllerType=0 controllerNumber=1 scan=17028	42.3126
19632:2	1	S.M[+15.995]PLPPHPGHPGYIN[+0.984]F.S		M[+16], N[+1]	845.904	2	1690.8	1690.8	0	-2	17	Non	681.11	571.78	82.72	9.05	1104	>sp|P02817|AMELX_BOVIN Amelogenin, X isoform OS=Bos taurus OX=9913 GN=AMELX PE=1 SV=2	1	hf1_eb_18273_84_20032023.ScanId;v=1;d1=17411.17411.2	controllerType=0 controllerNumber=1 scan=17411	43.003
21630:2	1	S.M[+15.995]PLPP[+31.990]HPGHPGYIN[+0.984]F.S		M[+16], N[+1], P[+32]	861.901	2	1722.8	1722.79	0	0.4	17	Non	234.55	234.55	4.23	3.26	1104	>sp|P02817|AMELX_BOVIN Amelogenin, X isoform OS=Bos taurus OX=9913 GN=AMELX PE=1 SV=2	1	hf1_eb_18273_84_20032023.ScanId;v=1;d1=18864.18864.2	controllerType=0 controllerNumber=1 scan=18864	45.6463
22913:2	1	S.M[+15.995]PLPPHP[+31.990]GHPGYIN[+0.984]F.S		M[+16], N[+1], P[+32]	861.898	2	1722.79	1722.79	0	-3.3	17	Non	326.96	326.96	1.19	5.21	1104	>sp|P02817|AMELX_BOVIN Amelogenin, X isoform OS=Bos taurus OX=9913 GN=AMELX PE=1 SV=2	1	hf1_eb_18273_84_20032023.ScanId;v=1;d1=19780.19780.2	controllerType=0 controllerNumber=1 scan=19780	47.2665
24038:2	1	S.M[+15.995]PLPPHP[+31.990]GHPGYIN[+0.984]F.S		M[+16], N[+1], P[+32]	861.899	2	1722.79	1722.79	0	-1.5	17	Non	346.84	346.84	12.24	5.1	1104	>sp|P02817|AMELX_BOVIN Amelogenin, X isoform OS=Bos taurus OX=9913 GN=AMELX PE=1 SV=2	1	hf1_eb_18273_84_20032023.ScanId;v=1;d1=20559.20559.2	controllerType=0 controllerNumber=1 scan=20559	48.6402
23759:2	1	S.M[+15.995]PLPPHP[+31.990]GHPGYIN[+0.984]F.S		M[+16], N[+1], P[+32]	861.902	2	1722.8	1722.79	0	0.9	17	Non	394.44	394.44	33.48	5.92	1104	>sp|P02817|AMELX_BOVIN Amelogenin, X isoform OS=Bos taurus OX=9913 GN=AMELX PE=1 SV=2	1	hf1_eb_18273_84_20032023.ScanId;v=1;d1=20364.20364.2	controllerType=0 controllerNumber=1 scan=20364	48.2956
23205:2	1	S.M[+15.995]PLPPHP[+31.990]GHPGYIN[+0.984]F.S		M[+16], N[+1], P[+32]	861.9	2	1722.79	1722.79	0	-1.3	17	Non	473.71	473.71	40.41	6.59	1104	>sp|P02817|AMELX_BOVIN Amelogenin, X isoform OS=Bos taurus OX=9913 GN=AMELX PE=1 SV=2	1	hf1_eb_18273_84_20032023.ScanId;v=1;d1=19978.19978.2	controllerType=0 controllerNumber=1 scan=19978	47.6153
23485:2	1	S.M[+15.995]PLPPHP[+31.990]GHPGYIN[+0.984]F.S		M[+16], N[+1], P[+32]	861.9	2	1722.79	1722.79	0	-1	17	Non	505.09	505.09	38.2	6.32	1104	>sp|P02817|AMELX_BOVIN Amelogenin, X isoform OS=Bos taurus OX=9913 GN=AMELX PE=1 SV=2	1	hf1_eb_18273_84_20032023.ScanId;v=1;d1=20171.20171.2	controllerType=0 controllerNumber=1 scan=20171	47.9577
16943:3	1	S.MP[+15.995]LPPHPGHPGYINFS.Y		P[+16]	592.955	3	1776.85	1776.85	0	-1.3	17	Non	164.7	159.58	4	1.84	1104	>sp|P02817|AMELX_BOVIN Amelogenin, X isoform OS=Bos taurus OX=9913 GN=AMELX PE=1 SV=2	1	hf1_eb_18273_84_20032023.ScanId;v=1;d1=15412.15412.3	controllerType=0 controllerNumber=1 scan=15412	39.4112
24026:2	1	S.MPLPPHPGHPGYIN[+0.984]FS[+79.966].Y		N[+1], S[+80]	921.406	2	1841.81	1841.81	0	-1.5	17	Non	153.46	153.46	113.95	2.45	1104	>sp|P02817|AMELX_BOVIN Amelogenin, X isoform OS=Bos taurus OX=9913 GN=AMELX PE=1 SV=2	1	hf1_eb_18273_84_20032023.ScanId;v=1;d1=20551.20551.2	controllerType=0 controllerNumber=1 scan=20551	48.6261
23696:2	1	S.MPLPPHPGHPGYIN[+0.984]FS[+79.966].Y		N[+1], S[+80]	921.409	2	1841.81	1841.81	0	1.4	17	Non	155.22	155.22	155.22	1.79	1104	>sp|P02817|AMELX_BOVIN Amelogenin, X isoform OS=Bos taurus OX=9913 GN=AMELX PE=1 SV=2	1	hf1_eb_18273_84_20032023.ScanId;v=1;d1=20320.20320.2	controllerType=0 controllerNumber=1 scan=20320	48.2178
20154:3	1	S.MP[+15.995]LPPHPGHPGYIN[+0.984]FS.Y		N[+1], P[+16]	593.283	3	1777.83	1777.84	0	-1.4	17	Non	166.36	149.85	4	1.84	1104	>sp|P02817|AMELX_BOVIN Amelogenin, X isoform OS=Bos taurus OX=9913 GN=AMELX PE=1 SV=2	1	hf1_eb_18273_84_20032023.ScanId;v=1;d1=17814.17814.3	controllerType=0 controllerNumber=1 scan=17814	43.7686
20414:3	1	S.MP[+15.995]LPPHPGHPGYIN[+0.984]FS.Y		N[+1], P[+16]	593.284	3	1777.84	1777.84	0	0.7	17	Non	183.65	133.41	4	1.41	1104	>sp|P02817|AMELX_BOVIN Amelogenin, X isoform OS=Bos taurus OX=9913 GN=AMELX PE=1 SV=2	1	hf1_eb_18273_84_20032023.ScanId;v=1;d1=18005.18005.3	controllerType=0 controllerNumber=1 scan=18005	44.1165
18607:3	1	S.MP[+15.995]LPPHPGHPGYINFS[+79.966].Y		P[+16], S[+80]	619.611	3	1856.82	1856.82	0	-0.1	17	Non	198.47	198.47	4	2.88	1104	>sp|P02817|AMELX_BOVIN Amelogenin, X isoform OS=Bos taurus OX=9913 GN=AMELX PE=1 SV=2	1	hf1_eb_18273_84_20032023.ScanId;v=1;d1=16656.16656.3	controllerType=0 controllerNumber=1 scan=16656	41.6409
19122:3	1	S.MP[+15.995]LPPHPGHPGYINFS[+79.966].Y		P[+16], S[+80]	619.611	3	1856.82	1856.82	0	0.1	17	Non	240.98	240.98	4	4.36	1104	>sp|P02817|AMELX_BOVIN Amelogenin, X isoform OS=Bos taurus OX=9913 GN=AMELX PE=1 SV=2	1	hf1_eb_18273_84_20032023.ScanId;v=1;d1=17040.17040.3	controllerType=0 controllerNumber=1 scan=17040	42.3347
17090:3	1	S.M[+15.995]PLPPHPGHPGYIN[+0.984]FS.Y		M[+16], N[+1]	593.281	3	1777.83	1777.84	0	-4.4	17	Non	255.09	219.8	5.26	3.3	1104	>sp|P02817|AMELX_BOVIN Amelogenin, X isoform OS=Bos taurus OX=9913 GN=AMELX PE=1 SV=2	1	hf1_eb_18273_84_20032023.ScanId;v=1;d1=15517.15517.6	controllerType=0 controllerNumber=1 scan=15517	39.5921
18779:2	1	S.M[+15.995]PLPPHPGHPGYINFS[+79.966].Y		M[+16], S[+80]	928.913	2	1856.82	1856.82	0	0.3	17	Non	266.37	266.37	1.66	5.01	1104	>sp|P02817|AMELX_BOVIN Amelogenin, X isoform OS=Bos taurus OX=9913 GN=AMELX PE=1 SV=2	1	hf1_eb_18273_84_20032023.ScanId;v=1;d1=16789.16789.2	controllerType=0 controllerNumber=1 scan=16789	41.8748
18612:2	1	S.M[+15.995]PLPPHPGHPGYINFS[+79.966].Y		M[+16], S[+80]	928.912	2	1856.82	1856.82	0	-1.6	17	Non	268.69	268.69	13.62	4.96	1104	>sp|P02817|AMELX_BOVIN Amelogenin, X isoform OS=Bos taurus OX=9913 GN=AMELX PE=1 SV=2	1	hf1_eb_18273_84_20032023.ScanId;v=1;d1=16660.16660.2	controllerType=0 controllerNumber=1 scan=16660	41.6468
18866:3	1	S.M[+15.995]PLPPHPGHPGYINFS[+79.966].Y		M[+16], S[+80]	619.611	3	1856.82	1856.82	0	0.5	17	Non	287.55	276.28	0.05	4.71	1104	>sp|P02817|AMELX_BOVIN Amelogenin, X isoform OS=Bos taurus OX=9913 GN=AMELX PE=1 SV=2	1	hf1_eb_18273_84_20032023.ScanId;v=1;d1=16856.16856.3	controllerType=0 controllerNumber=1 scan=16856	41.9951
17843:3	1	S.MP[+15.995]LPPHPGHPGYIN[+0.984]FS.Y		N[+1], P[+16]	593.283	3	1777.83	1777.84	0	-1.8	17	Non	289.97	90.62	4	3.43	1104	>sp|P02817|AMELX_BOVIN Amelogenin, X isoform OS=Bos taurus OX=9913 GN=AMELX PE=1 SV=2	1	hf1_eb_18273_84_20032023.ScanId;v=1;d1=16095.16095.3	controllerType=0 controllerNumber=1 scan=16095	40.6356
19193:2	1	S.M[+15.995]PLPPHPGHPGYINFS[+79.966].Y		M[+16], S[+80]	928.914	2	1856.82	1856.82	0	1.2	17	Non	297.83	297.83	6.47	5.27	1104	>sp|P02817|AMELX_BOVIN Amelogenin, X isoform OS=Bos taurus OX=9913 GN=AMELX PE=1 SV=2	1	hf1_eb_18273_84_20032023.ScanId;v=1;d1=17092.17092.2	controllerType=0 controllerNumber=1 scan=17092	42.426
19380:3	1	S.M[+15.995]PLPPHPGHPGYINFS[+79.966].Y		M[+16], S[+80]	619.612	3	1856.82	1856.82	0	1	17	Non	308.06	308.06	6.25	4.95	1104	>sp|P02817|AMELX_BOVIN Amelogenin, X isoform OS=Bos taurus OX=9913 GN=AMELX PE=1 SV=2	1	hf1_eb_18273_84_20032023.ScanId;v=1;d1=17231.17231.3	controllerType=0 controllerNumber=1 scan=17231	42.6839
17364:3	1	S.MP[+15.995]LPPHPGHPGYIN[+0.984]FS.Y		N[+1], P[+16]	593.282	3	1777.83	1777.84	0	-2.9	17	Non	312.14	109.16	4	3.43	1104	>sp|P02817|AMELX_BOVIN Amelogenin, X isoform OS=Bos taurus OX=9913 GN=AMELX PE=1 SV=2	1	hf1_eb_18273_84_20032023.ScanId;v=1;d1=15717.15717.3	controllerType=0 controllerNumber=1 scan=15717	39.9398
18087:3	1	S.MP[+15.995]LPPHPGHPGYIN[+0.984]FS.Y		N[+1], P[+16]	593.282	3	1777.83	1777.84	0	-2.2	17	Non	322.84	142.25	4	3.77	1104	>sp|P02817|AMELX_BOVIN Amelogenin, X isoform OS=Bos taurus OX=9913 GN=AMELX PE=1 SV=2	1	hf1_eb_18273_84_20032023.ScanId;v=1;d1=16287.16287.3	controllerType=0 controllerNumber=1 scan=16287	40.9874
17614:3	1	S.MP[+15.995]LPPHPGHPGYIN[+0.984]FS.Y		N[+1], P[+16]	593.282	3	1777.83	1777.84	0	-3.4	17	Non	359.32	174.08	4	4.52	1104	>sp|P02817|AMELX_BOVIN Amelogenin, X isoform OS=Bos taurus OX=9913 GN=AMELX PE=1 SV=2	1	hf1_eb_18273_84_20032023.ScanId;v=1;d1=15912.15912.3	controllerType=0 controllerNumber=1 scan=15912	40.2966
19036:2	1	S.M[+15.995]PLPPHPGHPGYINFS[+79.966].Y		M[+16], S[+80]	928.912	2	1856.82	1856.82	0	-1.4	17	Non	390.52	390.52	21.16	6.56	1104	>sp|P02817|AMELX_BOVIN Amelogenin, X isoform OS=Bos taurus OX=9913 GN=AMELX PE=1 SV=2	1	hf1_eb_18273_84_20032023.ScanId;v=1;d1=16980.16980.2	controllerType=0 controllerNumber=1 scan=16980	42.2207
20706:3	1	S.MP[+15.995]LPPHPGHPGYIN[+0.984]FS[+79.966].Y		N[+1], P[+16], S[+80]	619.939	3	1857.8	1857.8	0	0.1	17	Non	413.95	334.66	4	5.76	1104	>sp|P02817|AMELX_BOVIN Amelogenin, X isoform OS=Bos taurus OX=9913 GN=AMELX PE=1 SV=2	1	hf1_eb_18273_84_20032023.ScanId;v=1;d1=18209.18209.3	controllerType=0 controllerNumber=1 scan=18209	44.473
19914:3	1	S.M[+15.995]PLPPHPGHPGYIN[+0.984]FS[+79.966].Y		M[+16], N[+1], S[+80]	619.938	3	1857.8	1857.8	0	-1.8	17	Non	421.96	369.09	6.83	6.32	1104	>sp|P02817|AMELX_BOVIN Amelogenin, X isoform OS=Bos taurus OX=9913 GN=AMELX PE=1 SV=2	1	hf1_eb_18273_84_20032023.ScanId;v=1;d1=17636.17636.3	controllerType=0 controllerNumber=1 scan=17636	43.4396
20168:3	1	S.M[+15.995]PLPPHPGHPGYIN[+0.984]FS[+79.966].Y		M[+16], N[+1], S[+80]	619.938	3	1857.8	1857.8	0	-1.1	17	Non	444.52	381.98	7.46	7.04	1104	>sp|P02817|AMELX_BOVIN Amelogenin, X isoform OS=Bos taurus OX=9913 GN=AMELX PE=1 SV=2	1	hf1_eb_18273_84_20032023.ScanId;v=1;d1=17825.17825.3	controllerType=0 controllerNumber=1 scan=17825	43.787
20429:3	1	S.M[+15.995]PLPPHPGHPGYIN[+0.984]FS[+79.966].Y		M[+16], N[+1], S[+80]	619.939	3	1857.8	1857.8	0	-0.1	17	Non	470.26	391.72	0.47	6.56	1104	>sp|P02817|AMELX_BOVIN Amelogenin, X isoform OS=Bos taurus OX=9913 GN=AMELX PE=1 SV=2	1	hf1_eb_18273_84_20032023.ScanId;v=1;d1=18015.18015.3	controllerType=0 controllerNumber=1 scan=18015	44.1343
19692:2	1	S.M[+15.995]PLPPHPGHPGYIN[+0.984]FS[+79.966].Y		M[+16], N[+1], S[+80]	929.403	2	1857.8	1857.8	0	-2.5	17	Non	500.66	377.62	28.48	6.63	1104	>sp|P02817|AMELX_BOVIN Amelogenin, X isoform OS=Bos taurus OX=9913 GN=AMELX PE=1 SV=2	1	hf1_eb_18273_84_20032023.ScanId;v=1;d1=17455.17455.2	controllerType=0 controllerNumber=1 scan=17455	43.0843
20972:2	1	S.M[+15.995]PLPPHPGHPGYIN[+0.984]FS[+79.966].Y		M[+16], N[+1], S[+80]	929.405	2	1857.8	1857.8	0	0.1	17	Non	507.96	486.02	37.66	7.32	1104	>sp|P02817|AMELX_BOVIN Amelogenin, X isoform OS=Bos taurus OX=9913 GN=AMELX PE=1 SV=2	1	hf1_eb_18273_84_20032023.ScanId;v=1;d1=18395.18395.2	controllerType=0 controllerNumber=1 scan=18395	44.8024
20694:2	1	S.M[+15.995]PLPPHPGHPGYIN[+0.984]FS[+79.966].Y		M[+16], N[+1], S[+80]	929.407	2	1857.81	1857.8	0	1.7	17	Non	577.18	509.89	39.28	7.69	1104	>sp|P02817|AMELX_BOVIN Amelogenin, X isoform OS=Bos taurus OX=9913 GN=AMELX PE=1 SV=2	1	hf1_eb_18273_84_20032023.ScanId;v=1;d1=18200.18200.2	controllerType=0 controllerNumber=1 scan=18200	44.4576
20409:2	1	S.M[+15.995]PLPPHPGHPGYIN[+0.984]FS[+79.966].Y		M[+16], N[+1], S[+80]	929.406	2	1857.8	1857.8	0	0.7	17	Non	591.39	495.31	32.7	7.69	1104	>sp|P02817|AMELX_BOVIN Amelogenin, X isoform OS=Bos taurus OX=9913 GN=AMELX PE=1 SV=2	1	hf1_eb_18273_84_20032023.ScanId;v=1;d1=18000.18000.2	controllerType=0 controllerNumber=1 scan=18000	44.1063
19909:2	1	S.M[+15.995]PLPPHPGHPGYIN[+0.984]FS[+79.966].Y		M[+16], N[+1], S[+80]	929.405	2	1857.8	1857.8	0	-0.5	17	Non	613.78	434.23	38.78	9.03	1104	>sp|P02817|AMELX_BOVIN Amelogenin, X isoform OS=Bos taurus OX=9913 GN=AMELX PE=1 SV=2	1	hf1_eb_18273_84_20032023.ScanId;v=1;d1=17631.17631.2	controllerType=0 controllerNumber=1 scan=17631	43.4302
20153:2	1	S.M[+15.995]PLPPHPGHPGYIN[+0.984]FS[+79.966].Y		M[+16], N[+1], S[+80]	929.405	2	1857.8	1857.8	0	-0.2	17	Non	649.35	521.14	48.23	9.03	1104	>sp|P02817|AMELX_BOVIN Amelogenin, X isoform OS=Bos taurus OX=9913 GN=AMELX PE=1 SV=2	1	hf1_eb_18273_84_20032023.ScanId;v=1;d1=17813.17813.2	controllerType=0 controllerNumber=1 scan=17813	43.7671
20132:3	1	S.MP[+15.995]LPPHPGHPGYIN[+0.984]FSY.E		N[+1], P[+16]	647.638	3	1940.9	1940.9	0	0	17	Non	115.25	84.98	7.3	1.42	1104	>sp|P02817|AMELX_BOVIN Amelogenin, X isoform OS=Bos taurus OX=9913 GN=AMELX PE=1 SV=2	1	hf1_eb_18273_84_20032023.ScanId;v=1;d1=17799.17799.3	controllerType=0 controllerNumber=1 scan=17799	43.7414
20935:3	1	S.MP[+15.995]LPPHPGHPGYIN[+0.984]FSY.E		N[+1], P[+16]	647.638	3	1940.9	1940.9	0	-0.1	17	Non	198.63	6.26	6.26	1.5	1104	>sp|P02817|AMELX_BOVIN Amelogenin, X isoform OS=Bos taurus OX=9913 GN=AMELX PE=1 SV=2	1	hf1_eb_18273_84_20032023.ScanId;v=1;d1=18371.18371.3	controllerType=0 controllerNumber=1 scan=18371	44.7636
20664:3	1	S.MP[+15.995]LPPHPGHPGYIN[+0.984]FSY.E		N[+1], P[+16]	647.639	3	1940.9	1940.9	0	0.5	17	Non	217.76	56.85	7.3	1.56	1104	>sp|P02817|AMELX_BOVIN Amelogenin, X isoform OS=Bos taurus OX=9913 GN=AMELX PE=1 SV=2	1	hf1_eb_18273_84_20032023.ScanId;v=1;d1=18178.18178.3	controllerType=0 controllerNumber=1 scan=18178	44.4168
23645:2	1	S.MP[+15.995]LPPHPGHPGYIN[+0.984]FS[+79.966]Y.E		N[+1], P[+16], S[+80]	1010.94	2	2020.87	2020.87	0	0.2	17	Non	147.74	147.74	4	2.88	1104	>sp|P02817|AMELX_BOVIN Amelogenin, X isoform OS=Bos taurus OX=9913 GN=AMELX PE=1 SV=2	1	hf1_eb_18273_84_20032023.ScanId;v=1;d1=20282.20282.2	controllerType=0 controllerNumber=1 scan=20282	48.1473
23450:3	1	S.M[+15.995]PLPPHPGHPGYIN[+0.984]FS[+79.966]Y.E		M[+16], N[+1], S[+80]	674.292	3	2020.86	2020.87	0	-1.9	17	Non	342.4	342.4	3.36	5.19	1104	>sp|P02817|AMELX_BOVIN Amelogenin, X isoform OS=Bos taurus OX=9913 GN=AMELX PE=1 SV=2	1	hf1_eb_18273_84_20032023.ScanId;v=1;d1=20146.20146.3	controllerType=0 controllerNumber=1 scan=20146	47.9121
23727:3	1	S.M[+15.995]PLPPHPGHPGYIN[+0.984]FS[+79.966]Y.E		M[+16], N[+1], S[+80]	674.293	3	2020.87	2020.87	0	-0.2	17	Non	374.72	270.69	8.58	5.29	1104	>sp|P02817|AMELX_BOVIN Amelogenin, X isoform OS=Bos taurus OX=9913 GN=AMELX PE=1 SV=2	1	hf1_eb_18273_84_20032023.ScanId;v=1;d1=20343.20343.3	controllerType=0 controllerNumber=1 scan=20343	48.2594
22432:3	1	S.M[+15.995]PLPPHPGHPGYIN[+0.984]FS[+79.966]YE.V		M[+16], N[+1], S[+80]	717.308	3	2149.91	2149.91	0	0.2	17	Non	200.86	200.86	8.23	3.57	1104	>sp|P02817|AMELX_BOVIN Amelogenin, X isoform OS=Bos taurus OX=9913 GN=AMELX PE=1 SV=2	1	hf1_eb_18273_84_20032023.ScanId;v=1;d1=19437.19437.3	controllerType=0 controllerNumber=1 scan=19437	46.6528
28790:2	1	S.MP[+15.995]LPPHPGHPGYINFS[+79.966]YEVL.T		P[+16], S[+80]	1181.04	2	2361.07	2361.08	0	-4.9	17	Non	108.88	108.88	4	1.43	1104	>sp|P02817|AMELX_BOVIN Amelogenin, X isoform OS=Bos taurus OX=9913 GN=AMELX PE=1 SV=2	1	hf1_eb_18273_84_20032023.ScanId;v=1;d1=23876.23876.2	controllerType=0 controllerNumber=1 scan=23876	54.5081
27106:3	1	S.MP[+15.995]LPPHPGHPGYIN[+0.984]FSYEVL.T		N[+1], P[+16]	761.37	3	2282.09	2282.1	0	-0.4	17	Non	112.98	112.98	4	1.53	1104	>sp|P02817|AMELX_BOVIN Amelogenin, X isoform OS=Bos taurus OX=9913 GN=AMELX PE=1 SV=2	1	hf1_eb_18273_84_20032023.ScanId;v=1;d1=22715.22715.3	controllerType=0 controllerNumber=1 scan=22715	52.4831
28963:3	1	S.MP[+15.995]LPPHPGHPGYINFS[+79.966]YEVL.T		P[+16], S[+80]	787.695	3	2361.07	2361.08	0	-2.9	17	Non	201.27	201.27	4	3.17	1104	>sp|P02817|AMELX_BOVIN Amelogenin, X isoform OS=Bos taurus OX=9913 GN=AMELX PE=1 SV=2	1	hf1_eb_18273_84_20032023.ScanId;v=1;d1=24003.24003.3	controllerType=0 controllerNumber=1 scan=24003	54.7385
27696:3	1	S.MP[+15.995]LPPHPGHPGYIN[+0.984]FSYEVL.T		N[+1], P[+16]	761.369	3	2282.09	2282.1	0	-1.3	17	Non	202.17	202.17	4	2.81	1104	>sp|P02817|AMELX_BOVIN Amelogenin, X isoform OS=Bos taurus OX=9913 GN=AMELX PE=1 SV=2	1	hf1_eb_18273_84_20032023.ScanId;v=1;d1=23118.23118.3	controllerType=0 controllerNumber=1 scan=23118	53.1844
28681:3	1	S.MP[+15.995]LPPHPGHPGYINFS[+79.966]YEVL.T		P[+16], S[+80]	787.697	3	2361.07	2361.08	0	-1	17	Non	211.46	211.46	4	3.37	1104	>sp|P02817|AMELX_BOVIN Amelogenin, X isoform OS=Bos taurus OX=9913 GN=AMELX PE=1 SV=2	1	hf1_eb_18273_84_20032023.ScanId;v=1;d1=23803.23803.3	controllerType=0 controllerNumber=1 scan=23803	54.3824
27395:3	1	S.MP[+15.995]LPPHPGHPGYIN[+0.984]FSYEVL.T		N[+1], P[+16]	761.37	3	2282.09	2282.1	0	-0.1	17	Non	282.2	282.2	15.3	5.32	1104	>sp|P02817|AMELX_BOVIN Amelogenin, X isoform OS=Bos taurus OX=9913 GN=AMELX PE=1 SV=2	1	hf1_eb_18273_84_20032023.ScanId;v=1;d1=22915.22915.3	controllerType=0 controllerNumber=1 scan=22915	52.8344
29697:2	1	S.MP[+15.995]LPPHPGHPGYIN[+0.984]FS[+79.966]YEVL.T		N[+1], P[+16], S[+80]	1181.54	2	2362.06	2362.06	0	0.8	17	Non	148.52	148.52	4	2.79	1104	>sp|P02817|AMELX_BOVIN Amelogenin, X isoform OS=Bos taurus OX=9913 GN=AMELX PE=1 SV=2	1	hf1_eb_18273_84_20032023.ScanId;v=1;d1=24504.24504.2	controllerType=0 controllerNumber=1 scan=24504	55.6271
29405:2	1	S.MP[+15.995]LPPHPGHPGYIN[+0.984]FS[+79.966]YEVL.T		N[+1], P[+16], S[+80]	1181.54	2	2362.06	2362.06	0	0.7	17	Non	149.99	149.99	4	2.79	1104	>sp|P02817|AMELX_BOVIN Amelogenin, X isoform OS=Bos taurus OX=9913 GN=AMELX PE=1 SV=2	1	hf1_eb_18273_84_20032023.ScanId;v=1;d1=24299.24299.2	controllerType=0 controllerNumber=1 scan=24299	55.2618
29542:3	1	S.MP[+15.995]LPPHPGHPGYIN[+0.984]FS[+79.966]YEVL.T		N[+1], P[+16], S[+80]	788.024	3	2362.06	2362.06	0	-1.6	17	Non	223.82	223.82	4	2.63	1104	>sp|P02817|AMELX_BOVIN Amelogenin, X isoform OS=Bos taurus OX=9913 GN=AMELX PE=1 SV=2	1	hf1_eb_18273_84_20032023.ScanId;v=1;d1=24396.24396.3	controllerType=0 controllerNumber=1 scan=24396	55.4337
28137:3	1	S.MP[+15.995]LPPHPGHPGYIN[+0.984]FS[+79.966]YEVLT.P		N[+1], P[+16], S[+80]	821.707	3	2463.11	2463.11	0	-0.6	17	Non	192.06	192.06	4	3	1104	>sp|P02817|AMELX_BOVIN Amelogenin, X isoform OS=Bos taurus OX=9913 GN=AMELX PE=1 SV=2	1	hf1_eb_18273_84_20032023.ScanId;v=1;d1=23425.23425.3	controllerType=0 controllerNumber=1 scan=23425	53.7178
29617:3	1	S.MP[+15.995]LPPHPGHPGYIN[+0.984]FS[+79.966]YEVLTP.L		N[+1], P[+16], S[+80]	854.057	3	2560.16	2560.16	0	-1.7	17	Non	232.31	232.31	4	3.13	1104	>sp|P02817|AMELX_BOVIN Amelogenin, X isoform OS=Bos taurus OX=9913 GN=AMELX PE=1 SV=2	1	hf1_eb_18273_84_20032023.ScanId;v=1;d1=24450.24450.3	controllerType=0 controllerNumber=1 scan=24450	55.5308
31234:3	1	S.MP[+15.995]LPPHPGHPGYIN[+0.984]FSYEVLTPL.K		N[+1], P[+16]	865.098	3	2593.28	2593.28	0	-0.1	17	Non	130.92	130.92	4	2.43	1104	>sp|P02817|AMELX_BOVIN Amelogenin, X isoform OS=Bos taurus OX=9913 GN=AMELX PE=1 SV=2	1	hf1_eb_18273_84_20032023.ScanId;v=1;d1=25602.25602.3	controllerType=0 controllerNumber=1 scan=25602	57.5887
31851:3	1	S.MP[+15.995]LPPHPGHPGYIN[+0.984]FSYEVLTPL.K		N[+1], P[+16]	865.1	3	2593.28	2593.28	0	2	17	Non	169.2	169.2	4	2.67	1104	>sp|P02817|AMELX_BOVIN Amelogenin, X isoform OS=Bos taurus OX=9913 GN=AMELX PE=1 SV=2	1	hf1_eb_18273_84_20032023.ScanId;v=1;d1=26034.26034.3	controllerType=0 controllerNumber=1 scan=26034	58.3655
32880:3	1	S.MP[+15.995]LPPHPGHPGYINFS[+79.966]YEVLTPL.K		P[+16], S[+80]	891.425	3	2672.26	2672.26	0	0	17	Non	197.92	197.92	4	2.96	1104	>sp|P02817|AMELX_BOVIN Amelogenin, X isoform OS=Bos taurus OX=9913 GN=AMELX PE=1 SV=2	1	hf1_eb_18273_84_20032023.ScanId;v=1;d1=26740.26740.3	controllerType=0 controllerNumber=1 scan=26740	59.6456
31529:3	1	S.MP[+15.995]LPPHPGHPGYIN[+0.984]FSYEVLTPL.K		N[+1], P[+16]	865.097	3	2593.28	2593.28	0	-1	17	Non	207.03	207.03	4	3.65	1104	>sp|P02817|AMELX_BOVIN Amelogenin, X isoform OS=Bos taurus OX=9913 GN=AMELX PE=1 SV=2	1	hf1_eb_18273_84_20032023.ScanId;v=1;d1=25799.25799.3	controllerType=0 controllerNumber=1 scan=25799	57.9372
33159:3	1	S.MP[+15.995]LPPHPGHPGYINFS[+79.966]YEVLTPL.K		P[+16], S[+80]	891.424	3	2672.26	2672.26	0	-1.3	17	Non	210.2	210.2	4	3.65	1104	>sp|P02817|AMELX_BOVIN Amelogenin, X isoform OS=Bos taurus OX=9913 GN=AMELX PE=1 SV=2	1	hf1_eb_18273_84_20032023.ScanId;v=1;d1=26930.26930.3	controllerType=0 controllerNumber=1 scan=26930	59.985
32128:3	1	S.MP[+15.995]LPPHPGHPGYIN[+0.984]FSYEVLTPL.K		N[+1], P[+16]	865.099	3	2593.28	2593.28	0	0.7	17	Non	228.68	228.68	4	3.32	1104	>sp|P02817|AMELX_BOVIN Amelogenin, X isoform OS=Bos taurus OX=9913 GN=AMELX PE=1 SV=2	1	hf1_eb_18273_84_20032023.ScanId;v=1;d1=26224.26224.3	controllerType=0 controllerNumber=1 scan=26224	58.7175
33449:3	1	S.MP[+15.995]LPPHPGHPGYINFS[+79.966]YEVLTPL.K		P[+16], S[+80]	891.424	3	2672.26	2672.26	0	-1.7	17	Non	256.77	256.77	4	4.67	1104	>sp|P02817|AMELX_BOVIN Amelogenin, X isoform OS=Bos taurus OX=9913 GN=AMELX PE=1 SV=2	1	hf1_eb_18273_84_20032023.ScanId;v=1;d1=27125.27125.3	controllerType=0 controllerNumber=1 scan=27125	60.3374
33160:3	1	S.MP[+15.995]LPPHPGHPGYIN[+0.984]FS[+79.966]YEVLTPL.K		N[+1], P[+16], S[+80]	891.757	3	2673.26	2673.25	0	4.1	17	Non	220.21	220.21	4	2.51	1104	>sp|P02817|AMELX_BOVIN Amelogenin, X isoform OS=Bos taurus OX=9913 GN=AMELX PE=1 SV=2	1	hf1_eb_18273_84_20032023.ScanId;v=1;d1=26930.26930.3	controllerType=0 controllerNumber=1 scan=26930	59.985
34308:3	1	S.MP[+15.995]LPPHPGHPGYIN[+0.984]FS[+79.966]YEVLTPL.K		N[+1], P[+16], S[+80]	891.753	3	2673.24	2673.25	0	-0.6	17	Non	241.45	241.45	4	4.78	1104	>sp|P02817|AMELX_BOVIN Amelogenin, X isoform OS=Bos taurus OX=9913 GN=AMELX PE=1 SV=2	1	hf1_eb_18273_84_20032023.ScanId;v=1;d1=27703.27703.3	controllerType=0 controllerNumber=1 scan=27703	61.3798
33450:3	1	S.MP[+15.995]LPPHPGHPGYIN[+0.984]FS[+79.966]YEVLTPL.K		N[+1], P[+16], S[+80]	891.755	3	2673.25	2673.25	0	1.5	17	Non	259.73	259.73	4	4.55	1104	>sp|P02817|AMELX_BOVIN Amelogenin, X isoform OS=Bos taurus OX=9913 GN=AMELX PE=1 SV=2	1	hf1_eb_18273_84_20032023.ScanId;v=1;d1=27125.27125.3	controllerType=0 controllerNumber=1 scan=27125	60.3374
34014:3	1	S.MP[+15.995]LPPHPGHPGYIN[+0.984]FS[+79.966]YEVLTPL.K		N[+1], P[+16], S[+80]	891.755	3	2673.25	2673.25	0	1.3	17	Non	292.55	292.55	4	4.94	1104	>sp|P02817|AMELX_BOVIN Amelogenin, X isoform OS=Bos taurus OX=9913 GN=AMELX PE=1 SV=2	1	hf1_eb_18273_84_20032023.ScanId;v=1;d1=27511.27511.3	controllerType=0 controllerNumber=1 scan=27511	61.0372
26577:3	1	S.MP[+15.995]LPPHPGHPGYINFSYEVLTPLK.W		P[+16]	907.463	3	2720.37	2720.39	0	-6.2	17	NRagged	40.93	40.93	4	1.45	1104	>sp|P02817|AMELX_BOVIN Amelogenin, X isoform OS=Bos taurus OX=9913 GN=AMELX PE=1 SV=2	1	hf1_eb_18273_84_20032023.ScanId;v=1;d1=22349.22349.3	controllerType=0 controllerNumber=1 scan=22349	51.8315
30290:3	1	S.MPLPPHPGHPGYINFS[+79.966]YEVLTPLK.W		S[+80]	928.783	3	2784.33	2784.36	0	-9.7	17	NRagged	140.75	140.75	140.75	2.27	1104	>sp|P02817|AMELX_BOVIN Amelogenin, X isoform OS=Bos taurus OX=9913 GN=AMELX PE=1 SV=2	1	hf1_eb_18273_84_20032023.ScanId;v=1;d1=24953.24953.3	controllerType=0 controllerNumber=1 scan=24953	56.4398
30765:3	1	S.MPLPPHPGHPGYIN[+0.984]FS[+79.966]YEVLTPLK.W		N[+1], S[+80]	929.119	3	2785.34	2785.35	0	-1.7	17	NRagged	107.21	107.21	7.73	2.48	1104	>sp|P02817|AMELX_BOVIN Amelogenin, X isoform OS=Bos taurus OX=9913 GN=AMELX PE=1 SV=2	1	hf1_eb_18273_84_20032023.ScanId;v=1;d1=25275.25275.3	controllerType=0 controllerNumber=1 scan=25275	57.0055
28545:4	1	S.MP[+15.995]LPPHPGHPGYINFS[+79.966]YEVLTPLK.W		P[+16], S[+80]	700.843	4	2800.35	2800.36	0	-2	17	NRagged	145.37	145.37	4	2.49	1104	>sp|P02817|AMELX_BOVIN Amelogenin, X isoform OS=Bos taurus OX=9913 GN=AMELX PE=1 SV=2	1	hf1_eb_18273_84_20032023.ScanId;v=1;d1=23710.23710.3	controllerType=0 controllerNumber=1 scan=23710	54.2202
29008:4	1	S.MP[+15.995]LPPHPGHPGYINFS[+79.966]YEVLTPLK.W		P[+16], S[+80]	700.839	4	2800.33	2800.36	0	-8.3	17	NRagged	416.42	416.42	4	5.8	1104	>sp|P02817|AMELX_BOVIN Amelogenin, X isoform OS=Bos taurus OX=9913 GN=AMELX PE=1 SV=2	1	hf1_eb_18273_84_20032023.ScanId;v=1;d1=24036.24036.4	controllerType=0 controllerNumber=1 scan=24036	54.8015
31055:3	1	S.MPLPPHPGHPGYIN[+0.984]FS[+79.966]YEVLTPLK.W		N[+1], S[+80]	929.118	3	2785.34	2785.35	0	-2.3	17	NRagged	493.98	493.98	227	7.62	1104	>sp|P02817|AMELX_BOVIN Amelogenin, X isoform OS=Bos taurus OX=9913 GN=AMELX PE=1 SV=2	1	hf1_eb_18273_84_20032023.ScanId;v=1;d1=25473.25473.3	controllerType=0 controllerNumber=1 scan=25473	57.3573
28035:4	1	S.MP[+15.995]LPPHPGHPGYINFS[+79.966]YEVLTPLK.W		P[+16], S[+80]	700.844	4	2800.36	2800.36	0	-0.6	17	NRagged	496.53	496.53	4	7.29	1104	>sp|P02817|AMELX_BOVIN Amelogenin, X isoform OS=Bos taurus OX=9913 GN=AMELX PE=1 SV=2	1	hf1_eb_18273_84_20032023.ScanId;v=1;d1=23355.23355.4	controllerType=0 controllerNumber=1 scan=23355	53.5949
28317:4	1	S.MP[+15.995]LPPHPGHPGYINFS[+79.966]YEVLTPLK.W		P[+16], S[+80]	700.844	4	2800.35	2800.36	0	-1	17	NRagged	498.92	498.92	4	7.51	1104	>sp|P02817|AMELX_BOVIN Amelogenin, X isoform OS=Bos taurus OX=9913 GN=AMELX PE=1 SV=2	1	hf1_eb_18273_84_20032023.ScanId;v=1;d1=23551.23551.4	controllerType=0 controllerNumber=1 scan=23551	53.9387
27403:4	1	S.MP[+15.995]LPPHPGHPGYIN[+0.984]FSYEVLTPLK.W		N[+1], P[+16]	681.098	4	2721.37	2721.37	0	-0.8	17	NRagged	508.7	508.7	4	7.98	1104	>sp|P02817|AMELX_BOVIN Amelogenin, X isoform OS=Bos taurus OX=9913 GN=AMELX PE=1 SV=2	1	hf1_eb_18273_84_20032023.ScanId;v=1;d1=22919.22919.4	controllerType=0 controllerNumber=1 scan=22919	52.8404
28446:3	1	S.M[+15.995]PLPPHPGHPGYINFS[+79.966]YEVLTPLK.W		M[+16], S[+80]	934.124	3	2800.36	2800.36	0	-0.1	17	NRagged	1034.98	1034.98	42.44	18.02	1104	>sp|P02817|AMELX_BOVIN Amelogenin, X isoform OS=Bos taurus OX=9913 GN=AMELX PE=1 SV=2	1	hf1_eb_18273_84_20032023.ScanId;v=1;d1=23642.23642.3	controllerType=0 controllerNumber=1 scan=23642	54.1013
28169:3	1	S.M[+15.995]PLPPHPGHPGYINFS[+79.966]YEVLTPLK.W		M[+16], S[+80]	934.123	3	2800.35	2800.36	0	-0.9	17	NRagged	1119.35	1119.35	50.78	20.02	1104	>sp|P02817|AMELX_BOVIN Amelogenin, X isoform OS=Bos taurus OX=9913 GN=AMELX PE=1 SV=2	1	hf1_eb_18273_84_20032023.ScanId;v=1;d1=23446.23446.3	controllerType=0 controllerNumber=1 scan=23446	53.7541
28319:3	1	S.M[+31.990]PLPPHPGHPGYIN[+0.984]FS[+79.966]YEVLTPLK.W		M[+32], N[+1], S[+80]	939.783	3	2817.33	2817.34	0	-0.5	17	NRagged	162.04	162.04	0	2.91	1104	>sp|P02817|AMELX_BOVIN Amelogenin, X isoform OS=Bos taurus OX=9913 GN=AMELX PE=1 SV=2	1	hf1_eb_18273_84_20032023.ScanId;v=1;d1=23552.23552.3	controllerType=0 controllerNumber=1 scan=23552	53.9402
28028:3	1	S.MP[+15.995]LPPHPGHPGY[+15.995]INFS[+79.966]YEVLTPLK.W		P[+16], S[+80], Y[+16]	939.452	3	2816.34	2816.35	0	-4.1	17	NRagged	193.71	193.71	0	3.54	1104	>sp|P02817|AMELX_BOVIN Amelogenin, X isoform OS=Bos taurus OX=9913 GN=AMELX PE=1 SV=2	1	hf1_eb_18273_84_20032023.ScanId;v=1;d1=23350.23350.3	controllerType=0 controllerNumber=1 scan=23350	53.5846
29644:3	1	S.M[+15.995]PLPPHPGHPGYIN[+0.984]FS[+79.966]YEVLTPLK.W		M[+16], N[+1], S[+80]	934.45	3	2801.34	2801.34	0	-1.6	17	NRagged	202.57	202.57	7.81	4.65	1104	>sp|P02817|AMELX_BOVIN Amelogenin, X isoform OS=Bos taurus OX=9913 GN=AMELX PE=1 SV=2	1	hf1_eb_18273_84_20032023.ScanId;v=1;d1=24467.24467.3	controllerType=0 controllerNumber=1 scan=24467	55.5591
28910:3	1	S.M[+31.990]PLPPHPGHPGYIN[+0.984]FS[+79.966]YEVLTPLK.W		M[+32], N[+1], S[+80]	939.785	3	2817.34	2817.34	0	1.7	17	NRagged	260.38	243.75	0	5.66	1104	>sp|P02817|AMELX_BOVIN Amelogenin, X isoform OS=Bos taurus OX=9913 GN=AMELX PE=1 SV=2	1	hf1_eb_18273_84_20032023.ScanId;v=1;d1=23966.23966.3	controllerType=0 controllerNumber=1 scan=23966	54.6735
28605:3	1	S.M[+15.995]PLPPHPGH[+15.995]PGYINFS[+79.966]YEVLTPLK.W		H[+16], M[+16], S[+80]	939.45	3	2816.33	2816.35	0	-6.1	17	NRagged	269.32	269.32	0	4.74	1104	>sp|P02817|AMELX_BOVIN Amelogenin, X isoform OS=Bos taurus OX=9913 GN=AMELX PE=1 SV=2	1	hf1_eb_18273_84_20032023.ScanId;v=1;d1=23751.23751.3	controllerType=0 controllerNumber=1 scan=23751	54.2925
28606:3	1	S.MP[+31.990]LPPHPGHPGYIN[+0.984]FS[+79.966]YEVLTPLK.W		N[+1], P[+32], S[+80]	939.784	3	2817.34	2817.34	0	0.6	17	NRagged	296.62	296.62	0	6.15	1104	>sp|P02817|AMELX_BOVIN Amelogenin, X isoform OS=Bos taurus OX=9913 GN=AMELX PE=1 SV=2	1	hf1_eb_18273_84_20032023.ScanId;v=1;d1=23751.23751.3	controllerType=0 controllerNumber=1 scan=23751	54.2925
28744:4	1	S.MP[+15.995]LPPHPGHPGYIN[+0.984]FS[+79.966]YEVLTPLK.W		N[+1], P[+16], S[+80]	701.091	4	2801.34	2801.34	0	0	17	NRagged	442.48	442.48	4	7.32	1104	>sp|P02817|AMELX_BOVIN Amelogenin, X isoform OS=Bos taurus OX=9913 GN=AMELX PE=1 SV=2	1	hf1_eb_18273_84_20032023.ScanId;v=1;d1=23846.23846.4	controllerType=0 controllerNumber=1 scan=23846	54.4559
27884:3	1	S.M[+15.995]PLPPHPGHPGYIN[+0.984]FS[+79.966]YEVLTPLK.W		M[+16], N[+1], S[+80]	934.453	3	2801.35	2801.34	0	1.8	17	NRagged	487.28	487.28	14.74	7.96	1104	>sp|P02817|AMELX_BOVIN Amelogenin, X isoform OS=Bos taurus OX=9913 GN=AMELX PE=1 SV=2	1	hf1_eb_18273_84_20032023.ScanId;v=1;d1=23250.23250.3	controllerType=0 controllerNumber=1 scan=23250	53.414
29009:4	1	S.MP[+15.995]LPPHPGHPGYIN[+0.984]FS[+79.966]YEVLTPLK.W		N[+1], P[+16], S[+80]	701.09	4	2801.34	2801.34	0	-1.3	17	NRagged	531.08	531.08	4	7.56	1104	>sp|P02817|AMELX_BOVIN Amelogenin, X isoform OS=Bos taurus OX=9913 GN=AMELX PE=1 SV=2	1	hf1_eb_18273_84_20032023.ScanId;v=1;d1=24036.24036.4	controllerType=0 controllerNumber=1 scan=24036	54.8015
29293:3	1	S.M[+15.995]PLPPHPGHPGYIN[+0.984]FS[+79.966]YEVLTPLK.W		M[+16], N[+1], S[+80]	934.451	3	2801.34	2801.34	0	-0.6	17	NRagged	993.97	980.87	45.29	17.02	1104	>sp|P02817|AMELX_BOVIN Amelogenin, X isoform OS=Bos taurus OX=9913 GN=AMELX PE=1 SV=2	1	hf1_eb_18273_84_20032023.ScanId;v=1;d1=24224.24224.3	controllerType=0 controllerNumber=1 scan=24224	55.1345
28739:3	1	S.M[+15.995]PLPPHPGHPGYIN[+0.984]FS[+79.966]YEVLTPLK.W		M[+16], N[+1], S[+80]	934.452	3	2801.34	2801.34	0	-0.2	17	NRagged	1053.81	1033.02	53.37	19.02	1104	>sp|P02817|AMELX_BOVIN Amelogenin, X isoform OS=Bos taurus OX=9913 GN=AMELX PE=1 SV=2	1	hf1_eb_18273_84_20032023.ScanId;v=1;d1=23843.23843.3	controllerType=0 controllerNumber=1 scan=23843	54.4515
29005:3	1	S.M[+15.995]PLPPHPGHPGYIN[+0.984]FS[+79.966]YEVLTPLK.W		M[+16], N[+1], S[+80]	934.45	3	2801.34	2801.34	0	-1.8	17	NRagged	1096.26	1093.9	48.3	18.8	1104	>sp|P02817|AMELX_BOVIN Amelogenin, X isoform OS=Bos taurus OX=9913 GN=AMELX PE=1 SV=2	1	hf1_eb_18273_84_20032023.ScanId;v=1;d1=24032.24032.3	controllerType=0 controllerNumber=1 scan=24032	54.7929
34587:3	1	S.MP[+15.995]LPPHPGHPGYINFS[+79.966]YEVLTPLKW.Y		P[+16], S[+80]	996.148	3	2986.43	2986.44	0	-2.2	17	Non	3.2	3.2	2.64	1.51	1104	>sp|P02817|AMELX_BOVIN Amelogenin, X isoform OS=Bos taurus OX=9913 GN=AMELX PE=1 SV=2	1	hf1_eb_18273_84_20032023.ScanId;v=1;d1=27888.27888.3	controllerType=0 controllerNumber=1 scan=27888	61.7022
34652:3	1	S.MP[+15.995]LPPHPGHPGYINFS[+79.966]YEVLTPLKW.Y		P[+16], S[+80]	996.153	3	2986.45	2986.44	0	3.1	17	Non	137.62	137.62	4	2.31	1104	>sp|P02817|AMELX_BOVIN Amelogenin, X isoform OS=Bos taurus OX=9913 GN=AMELX PE=1 SV=2	1	hf1_eb_18273_84_20032023.ScanId;v=1;d1=27932.27932.3	controllerType=0 controllerNumber=1 scan=27932	61.7826
36113:3	1	S.MP[+15.995]LPPHPGHPGYIN[+0.984]FS[+79.966]YEVLTPLKWY.Q		N[+1], P[+16], S[+80]	1050.83	3	3150.48	3150.48	0	0.2	17	Non	118.18	118.18	4	2.76	1104	>sp|P02817|AMELX_BOVIN Amelogenin, X isoform OS=Bos taurus OX=9913 GN=AMELX PE=1 SV=2	1	hf1_eb_18273_84_20032023.ScanId;v=1;d1=28934.28934.3	controllerType=0 controllerNumber=1 scan=28934	63.5767
05769:2	1	M.PLPPHPGHP.G			474.756	2	948.505	948.505	0	-0.5	18	Non	333.15	193.29	193.29	4.28	1104	>sp|P02817|AMELX_BOVIN Amelogenin, X isoform OS=Bos taurus OX=9913 GN=AMELX PE=1 SV=2	1	hf1_eb_18273_84_20032023.ScanId;v=1;d1=7020.7020.2	controllerType=0 controllerNumber=1 scan=7020	23.6291
05442:2	1	M.PLPPHPGHP.G			474.756	2	948.505	948.505	0	-0.3	18	Non	348.05	209.31	209.31	4.78	1104	>sp|P02817|AMELX_BOVIN Amelogenin, X isoform OS=Bos taurus OX=9913 GN=AMELX PE=1 SV=2	1	hf1_eb_18273_84_20032023.ScanId;v=1;d1=6738.6738.2	controllerType=0 controllerNumber=1 scan=6738	23.0171
05471:2	1	M.PLPPHPGHP.G			474.756	2	948.504	948.505	0	-0.7	18	Non	357.52	226.5	226.5	4.78	1104	>sp|P02817|AMELX_BOVIN Amelogenin, X isoform OS=Bos taurus OX=9913 GN=AMELX PE=1 SV=2	1	hf1_eb_18273_84_20032023.ScanId;v=1;d1=6763.6763.2	controllerType=0 controllerNumber=1 scan=6763	23.0655
04894:2	1	M.PLPPHPGHP.G			474.755	2	948.504	948.505	0	-1.4	18	Non	468.69	246.7	246.7	4.98	1104	>sp|P02817|AMELX_BOVIN Amelogenin, X isoform OS=Bos taurus OX=9913 GN=AMELX PE=1 SV=2	1	hf1_eb_18273_84_20032023.ScanId;v=1;d1=6268.6268.2	controllerType=0 controllerNumber=1 scan=6268	21.9837
05263:2	1	M.PLPPHPGHP.G			474.756	2	948.504	948.505	0	-1.2	18	Non	470.41	249.72	249.72	5.21	1104	>sp|P02817|AMELX_BOVIN Amelogenin, X isoform OS=Bos taurus OX=9913 GN=AMELX PE=1 SV=2	1	hf1_eb_18273_84_20032023.ScanId;v=1;d1=6583.6583.2	controllerType=0 controllerNumber=1 scan=6583	22.6706
05073:2	1	M.PLPPHPGHP.G			474.756	2	948.504	948.505	0	-1.2	18	Non	478.23	260.01	260.01	5.68	1104	>sp|P02817|AMELX_BOVIN Amelogenin, X isoform OS=Bos taurus OX=9913 GN=AMELX PE=1 SV=2	1	hf1_eb_18273_84_20032023.ScanId;v=1;d1=6421.6421.2	controllerType=0 controllerNumber=1 scan=6421	22.3217
07233:2	1	M.PLPPHPGHPGY.I			584.798	2	1168.59	1168.59	0	-0.2	18	Non	317.46	261.48	261.48	4.53	1104	>sp|P02817|AMELX_BOVIN Amelogenin, X isoform OS=Bos taurus OX=9913 GN=AMELX PE=1 SV=2	1	hf1_eb_18273_84_20032023.ScanId;v=1;d1=8212.8212.2	controllerType=0 controllerNumber=1 scan=8212	26.0536
11437:3	1	M.PLPPHPGHPGYI.N			427.895	3	1281.67	1281.67	0	-2.1	18	Non	302.68	245.63	245.63	4.33	1104	>sp|P02817|AMELX_BOVIN Amelogenin, X isoform OS=Bos taurus OX=9913 GN=AMELX PE=1 SV=2	1	hf1_eb_18273_84_20032023.ScanId;v=1;d1=11430.11430.3	controllerType=0 controllerNumber=1 scan=11430	32.1984
11735:3	1	M.PLPPHPGHPGYI.N			427.896	3	1281.67	1281.67	0	-1.4	18	Non	382.54	276.94	276.94	5.01	1104	>sp|P02817|AMELX_BOVIN Amelogenin, X isoform OS=Bos taurus OX=9913 GN=AMELX PE=1 SV=2	1	hf1_eb_18273_84_20032023.ScanId;v=1;d1=11652.11652.3	controllerType=0 controllerNumber=1 scan=11652	32.6187
09393:3	1	M.PLPPHPGHPGYIN.F			465.91	3	1395.72	1395.72	0	-0.9	18	Non	239.33	239.33	239.33	2.97	1104	>sp|P02817|AMELX_BOVIN Amelogenin, X isoform OS=Bos taurus OX=9913 GN=AMELX PE=1 SV=2	1	hf1_eb_18273_84_20032023.ScanId;v=1;d1=9899.9899.3	controllerType=0 controllerNumber=1 scan=9899	29.3619
11654:3	1	M.PLPPHPGHPGYIN[+0.984].F		N[+1]	466.238	3	1396.7	1396.7	0	-0.7	18	Non	180.66	149.21	149.21	1.44	1104	>sp|P02817|AMELX_BOVIN Amelogenin, X isoform OS=Bos taurus OX=9913 GN=AMELX PE=1 SV=2	1	hf1_eb_18273_84_20032023.ScanId;v=1;d1=11589.11589.3	controllerType=0 controllerNumber=1 scan=11589	32.4978
11301:2	1	M.PLPPHPGHPGYIN[+0.984].F		N[+1]	698.853	2	1396.7	1396.7	0	-1.8	18	Non	230.51	230.51	230.51	3.07	1104	>sp|P02817|AMELX_BOVIN Amelogenin, X isoform OS=Bos taurus OX=9913 GN=AMELX PE=1 SV=2	1	hf1_eb_18273_84_20032023.ScanId;v=1;d1=11331.11331.2	controllerType=0 controllerNumber=1 scan=11331	32.0072
12431:3	1	M.PLPPHPGHPGYIN[+0.984].F		N[+1]	466.238	3	1396.7	1396.7	0	-0.4	18	Non	290.4	252.65	252.65	4.42	1104	>sp|P02817|AMELX_BOVIN Amelogenin, X isoform OS=Bos taurus OX=9913 GN=AMELX PE=1 SV=2	1	hf1_eb_18273_84_20032023.ScanId;v=1;d1=12161.12161.3	controllerType=0 controllerNumber=1 scan=12161	33.5566
11019:2	1	M.PLPPHPGHPGYIN[+0.984].F		N[+1]	698.853	2	1396.7	1396.7	0	-1.1	18	Non	373.39	329.9	329.9	5.48	1104	>sp|P02817|AMELX_BOVIN Amelogenin, X isoform OS=Bos taurus OX=9913 GN=AMELX PE=1 SV=2	1	hf1_eb_18273_84_20032023.ScanId;v=1;d1=11116.11116.2	controllerType=0 controllerNumber=1 scan=11116	31.6124
11398:3	1	M.PLPPHPGHPGYIN[+0.984].F		N[+1]	466.238	3	1396.7	1396.7	0	-2.1	18	Non	399.71	379.15	379.15	5.72	1104	>sp|P02817|AMELX_BOVIN Amelogenin, X isoform OS=Bos taurus OX=9913 GN=AMELX PE=1 SV=2	1	hf1_eb_18273_84_20032023.ScanId;v=1;d1=11400.11400.3	controllerType=0 controllerNumber=1 scan=11400	32.1413
10759:2	1	M.PLPPHPGHPGYIN[+0.984].F		N[+1]	698.854	2	1396.7	1396.7	0	-0.7	18	Non	402.45	298.59	298.59	5.47	1104	>sp|P02817|AMELX_BOVIN Amelogenin, X isoform OS=Bos taurus OX=9913 GN=AMELX PE=1 SV=2	1	hf1_eb_18273_84_20032023.ScanId;v=1;d1=10923.10923.2	controllerType=0 controllerNumber=1 scan=10923	31.2616
12703:3	1	M.PLPPHPGHPGYIN[+0.984].F		N[+1]	466.238	3	1396.7	1396.7	0	-0.8	18	Non	432.43	387.76	387.76	6.01	1104	>sp|P02817|AMELX_BOVIN Amelogenin, X isoform OS=Bos taurus OX=9913 GN=AMELX PE=1 SV=2	1	hf1_eb_18273_84_20032023.ScanId;v=1;d1=12351.12351.3	controllerType=0 controllerNumber=1 scan=12351	33.9011
10385:3	1	M.PLPPHPGHPGYIN[+0.984].F		N[+1]	466.239	3	1396.7	1396.7	0	0.2	18	Non	434.52	434.52	434.52	6.24	1104	>sp|P02817|AMELX_BOVIN Amelogenin, X isoform OS=Bos taurus OX=9913 GN=AMELX PE=1 SV=2	1	hf1_eb_18273_84_20032023.ScanId;v=1;d1=10650.10650.3	controllerType=0 controllerNumber=1 scan=10650	30.7669
10904:3	1	M.PLPPHPGHPGYIN[+0.984].F		N[+1]	466.238	3	1396.7	1396.7	0	-0.7	18	Non	451.63	427.18	427.18	6.74	1104	>sp|P02817|AMELX_BOVIN Amelogenin, X isoform OS=Bos taurus OX=9913 GN=AMELX PE=1 SV=2	1	hf1_eb_18273_84_20032023.ScanId;v=1;d1=11030.11030.3	controllerType=0 controllerNumber=1 scan=11030	31.4541
11148:3	1	M.PLPPHPGHPGYIN[+0.984].F		N[+1]	466.238	3	1396.7	1396.7	0	-0.6	18	Non	468.21	441.64	441.64	6.74	1104	>sp|P02817|AMELX_BOVIN Amelogenin, X isoform OS=Bos taurus OX=9913 GN=AMELX PE=1 SV=2	1	hf1_eb_18273_84_20032023.ScanId;v=1;d1=11215.11215.3	controllerType=0 controllerNumber=1 scan=11215	31.7941
10650:3	1	M.PLPPHPGHPGYIN[+0.984].F		N[+1]	466.239	3	1396.7	1396.7	0	0.6	18	Non	477.3	456.4	456.4	6.4	1104	>sp|P02817|AMELX_BOVIN Amelogenin, X isoform OS=Bos taurus OX=9913 GN=AMELX PE=1 SV=2	1	hf1_eb_18273_84_20032023.ScanId;v=1;d1=10840.10840.3	controllerType=0 controllerNumber=1 scan=10840	31.1158
18223:2	1	M.PLPPHPGHPGYINF.S			771.897	2	1542.79	1542.79	0	0.8	18	Non	262.19	231.57	231.57	4.44	1104	>sp|P02817|AMELX_BOVIN Amelogenin, X isoform OS=Bos taurus OX=9913 GN=AMELX PE=1 SV=2	1	hf1_eb_18273_84_20032023.ScanId;v=1;d1=16388.16388.2	controllerType=0 controllerNumber=1 scan=16388	41.1638
18224:2	1	M.PLPPHPGHPGYIN[+0.984]F.S		N[+1]	772.383	2	1543.76	1543.77	0	-7.3	18	Non	242.99	242.99	242.99	3.25	1104	>sp|P02817|AMELX_BOVIN Amelogenin, X isoform OS=Bos taurus OX=9913 GN=AMELX PE=1 SV=2	1	hf1_eb_18273_84_20032023.ScanId;v=1;d1=16388.16388.2	controllerType=0 controllerNumber=1 scan=16388	41.1638
21510:3	1	M.PLPPHPGHPGYIN[+0.984]F.S		N[+1]	515.261	3	1543.77	1543.77	0	-0.3	18	Non	244.74	244.74	244.74	4.06	1104	>sp|P02817|AMELX_BOVIN Amelogenin, X isoform OS=Bos taurus OX=9913 GN=AMELX PE=1 SV=2	1	hf1_eb_18273_84_20032023.ScanId;v=1;d1=18778.18778.3	controllerType=0 controllerNumber=1 scan=18778	45.4917
20156:3	1	M.PLPPHPGHPGYIN[+0.984]F.S		N[+1]	515.261	3	1543.77	1543.77	0	0.5	18	Non	246.4	246.4	246.4	3.73	1104	>sp|P02817|AMELX_BOVIN Amelogenin, X isoform OS=Bos taurus OX=9913 GN=AMELX PE=1 SV=2	1	hf1_eb_18273_84_20032023.ScanId;v=1;d1=17815.17815.3	controllerType=0 controllerNumber=1 scan=17815	43.7701
19402:3	1	M.PLPPHPGHPGYIN[+0.984]F.S		N[+1]	515.261	3	1543.77	1543.77	0	-1.2	18	Non	294.02	294.02	294.02	5	1104	>sp|P02817|AMELX_BOVIN Amelogenin, X isoform OS=Bos taurus OX=9913 GN=AMELX PE=1 SV=2	1	hf1_eb_18273_84_20032023.ScanId;v=1;d1=17246.17246.3	controllerType=0 controllerNumber=1 scan=17246	42.7102
20742:2	1	M.PLPPHPGHPGYIN[+0.984]F.S		N[+1]	772.389	2	1543.77	1543.77	0	1.3	18	Non	305.79	278.94	278.94	4.73	1104	>sp|P02817|AMELX_BOVIN Amelogenin, X isoform OS=Bos taurus OX=9913 GN=AMELX PE=1 SV=2	1	hf1_eb_18273_84_20032023.ScanId;v=1;d1=18235.18235.2	controllerType=0 controllerNumber=1 scan=18235	44.5181
21226:3	1	M.PLPPHPGHPGYIN[+0.984]F.S		N[+1]	515.261	3	1543.77	1543.77	0	0.3	18	Non	311.08	311.08	311.08	4.89	1104	>sp|P02817|AMELX_BOVIN Amelogenin, X isoform OS=Bos taurus OX=9913 GN=AMELX PE=1 SV=2	1	hf1_eb_18273_84_20032023.ScanId;v=1;d1=18582.18582.3	controllerType=0 controllerNumber=1 scan=18582	45.1461
18419:3	1	M.PLPPHPGHPGYIN[+0.984]F.S		N[+1]	515.261	3	1543.77	1543.77	0	-0.9	18	Non	326.72	326.72	326.72	5.11	1104	>sp|P02817|AMELX_BOVIN Amelogenin, X isoform OS=Bos taurus OX=9913 GN=AMELX PE=1 SV=2	1	hf1_eb_18273_84_20032023.ScanId;v=1;d1=16522.16522.3	controllerType=0 controllerNumber=1 scan=16522	41.404
19897:3	1	M.PLPPHPGHPGYIN[+0.984]F.S		N[+1]	515.261	3	1543.77	1543.77	0	-0.3	18	Non	328.38	318.73	318.73	4.91	1104	>sp|P02817|AMELX_BOVIN Amelogenin, X isoform OS=Bos taurus OX=9913 GN=AMELX PE=1 SV=2	1	hf1_eb_18273_84_20032023.ScanId;v=1;d1=17623.17623.3	controllerType=0 controllerNumber=1 scan=17623	43.4162
19679:3	1	M.PLPPHPGHPGYIN[+0.984]F.S		N[+1]	515.261	3	1543.77	1543.77	0	-1.4	18	Non	348.77	318.74	318.74	5.02	1104	>sp|P02817|AMELX_BOVIN Amelogenin, X isoform OS=Bos taurus OX=9913 GN=AMELX PE=1 SV=2	1	hf1_eb_18273_84_20032023.ScanId;v=1;d1=17446.17446.3	controllerType=0 controllerNumber=1 scan=17446	43.068
20413:3	1	M.PLPPHPGHPGYIN[+0.984]F.S		N[+1]	515.261	3	1543.77	1543.77	0	-0.1	18	Non	353.96	353.96	353.96	5.11	1104	>sp|P02817|AMELX_BOVIN Amelogenin, X isoform OS=Bos taurus OX=9913 GN=AMELX PE=1 SV=2	1	hf1_eb_18273_84_20032023.ScanId;v=1;d1=18004.18004.3	controllerType=0 controllerNumber=1 scan=18004	44.115
18679:3	1	M.PLPPHPGHPGYIN[+0.984]F.S		N[+1]	515.261	3	1543.77	1543.77	0	-0.1	18	Non	365.29	365.29	365.29	6	1104	>sp|P02817|AMELX_BOVIN Amelogenin, X isoform OS=Bos taurus OX=9913 GN=AMELX PE=1 SV=2	1	hf1_eb_18273_84_20032023.ScanId;v=1;d1=16716.16716.3	controllerType=0 controllerNumber=1 scan=16716	41.7505
18944:3	1	M.PLPPHPGHPGYIN[+0.984]F.S		N[+1]	515.261	3	1543.77	1543.77	0	-0.8	18	Non	371.12	371.12	371.12	6	1104	>sp|P02817|AMELX_BOVIN Amelogenin, X isoform OS=Bos taurus OX=9913 GN=AMELX PE=1 SV=2	1	hf1_eb_18273_84_20032023.ScanId;v=1;d1=16913.16913.3	controllerType=0 controllerNumber=1 scan=16913	42.0994
20691:3	1	M.PLPPHPGHPGYIN[+0.984]F.S		N[+1]	515.261	3	1543.77	1543.77	0	0.5	18	Non	371.54	371.54	371.54	5.66	1104	>sp|P02817|AMELX_BOVIN Amelogenin, X isoform OS=Bos taurus OX=9913 GN=AMELX PE=1 SV=2	1	hf1_eb_18273_84_20032023.ScanId;v=1;d1=18198.18198.3	controllerType=0 controllerNumber=1 scan=18198	44.4551
20970:3	1	M.PLPPHPGHPGYIN[+0.984]F.S		N[+1]	515.261	3	1543.77	1543.77	0	-0.2	18	Non	373.72	343.67	343.67	5.16	1104	>sp|P02817|AMELX_BOVIN Amelogenin, X isoform OS=Bos taurus OX=9913 GN=AMELX PE=1 SV=2	1	hf1_eb_18273_84_20032023.ScanId;v=1;d1=18394.18394.3	controllerType=0 controllerNumber=1 scan=18394	44.8009
19317:2	1	M.PLPPHPGHPGYIN[+0.984]F.S		N[+1]	772.39	2	1543.77	1543.77	0	2.3	18	Non	419.98	338.08	338.08	5.16	1104	>sp|P02817|AMELX_BOVIN Amelogenin, X isoform OS=Bos taurus OX=9913 GN=AMELX PE=1 SV=2	1	hf1_eb_18273_84_20032023.ScanId;v=1;d1=17185.17185.2	controllerType=0 controllerNumber=1 scan=17185	42.5968
17778:2	1	M.PLPPHPGHPGYIN[+0.984]F.S		N[+1]	772.389	2	1543.77	1543.77	0	0.5	18	Non	447.7	390.21	390.21	6.02	1104	>sp|P02817|AMELX_BOVIN Amelogenin, X isoform OS=Bos taurus OX=9913 GN=AMELX PE=1 SV=2	1	hf1_eb_18273_84_20032023.ScanId;v=1;d1=16044.16044.2	controllerType=0 controllerNumber=1 scan=16044	40.5359
18521:2	1	M.PLPPHPGHPGYIN[+0.984]F.S		N[+1]	772.388	2	1543.77	1543.77	0	-0.2	18	Non	546.67	459.92	459.92	6.6	1104	>sp|P02817|AMELX_BOVIN Amelogenin, X isoform OS=Bos taurus OX=9913 GN=AMELX PE=1 SV=2	1	hf1_eb_18273_84_20032023.ScanId;v=1;d1=16593.16593.2	controllerType=0 controllerNumber=1 scan=16593	41.5287
19035:2	1	M.PLPPHPGHPGYIN[+0.984]F.S		N[+1]	772.388	2	1543.77	1543.77	0	0.1	18	Non	570	486.33	486.33	7.26	1104	>sp|P02817|AMELX_BOVIN Amelogenin, X isoform OS=Bos taurus OX=9913 GN=AMELX PE=1 SV=2	1	hf1_eb_18273_84_20032023.ScanId;v=1;d1=16979.16979.2	controllerType=0 controllerNumber=1 scan=16979	42.2192
18770:2	1	M.PLPPHPGHPGYIN[+0.984]F.S		N[+1]	772.388	2	1543.77	1543.77	0	-0.3	18	Non	618.82	508.44	508.44	8.26	1104	>sp|P02817|AMELX_BOVIN Amelogenin, X isoform OS=Bos taurus OX=9913 GN=AMELX PE=1 SV=2	1	hf1_eb_18273_84_20032023.ScanId;v=1;d1=16784.16784.2	controllerType=0 controllerNumber=1 scan=16784	41.8676
17978:3	1	M.PLPPHP[+15.995]GHPGYIN[+0.984]F.S		N[+1], P[+16]	520.592	3	1559.76	1559.76	0	-2.5	18	Non	171.4	171.4	0	2.14	1104	>sp|P02817|AMELX_BOVIN Amelogenin, X isoform OS=Bos taurus OX=9913 GN=AMELX PE=1 SV=2	1	hf1_eb_18273_84_20032023.ScanId;v=1;d1=16201.16201.3	controllerType=0 controllerNumber=1 scan=16201	40.8237
17156:3	1	M.PLPPHPGHP[+15.995]GYIN[+0.984]F.S		N[+1], P[+16]	520.592	3	1559.76	1559.76	0	-0.7	18	Non	212.63	208.36	2.95	2.97	1104	>sp|P02817|AMELX_BOVIN Amelogenin, X isoform OS=Bos taurus OX=9913 GN=AMELX PE=1 SV=2	1	hf1_eb_18273_84_20032023.ScanId;v=1;d1=15564.15564.3	controllerType=0 controllerNumber=1 scan=15564	39.6671
23477:2	1	M.PLPPHP[+31.990]GHPGYIN[+0.984]F.S		N[+1], P[+32]	788.381	2	1575.76	1575.76	0	-2.3	18	Non	227.93	210.28	5.07	3.38	1104	>sp|P02817|AMELX_BOVIN Amelogenin, X isoform OS=Bos taurus OX=9913 GN=AMELX PE=1 SV=2	1	hf1_eb_18273_84_20032023.ScanId;v=1;d1=20163.20163.2	controllerType=0 controllerNumber=1 scan=20163	47.9429
17449:3	1	M.PLPPHPGHP[+15.995]GYIN[+0.984]F.S		N[+1], P[+16]	520.592	3	1559.76	1559.76	0	-2.5	18	Non	320.07	283.14	6.15	4.7	1104	>sp|P02817|AMELX_BOVIN Amelogenin, X isoform OS=Bos taurus OX=9913 GN=AMELX PE=1 SV=2	1	hf1_eb_18273_84_20032023.ScanId;v=1;d1=15778.15778.3	controllerType=0 controllerNumber=1 scan=15778	40.0461
23806:2	1	M.PLPP[+31.990]HPGHPGYIN[+0.984]F.S		N[+1], P[+32]	788.382	2	1575.76	1575.76	0	-1.8	18	Non	329.64	256.01	15.79	4.87	1104	>sp|P02817|AMELX_BOVIN Amelogenin, X isoform OS=Bos taurus OX=9913 GN=AMELX PE=1 SV=2	1	hf1_eb_18273_84_20032023.ScanId;v=1;d1=20398.20398.2	controllerType=0 controllerNumber=1 scan=20398	48.3546
20593:2	1	M.PLPPHPGHPGYIN[+0.984]FS[+79.966].Y		N[+1], S[+80]	855.886	2	1710.76	1710.77	0	-2	18	Non	281.84	280.12	221.09	4.85	1104	>sp|P02817|AMELX_BOVIN Amelogenin, X isoform OS=Bos taurus OX=9913 GN=AMELX PE=1 SV=2	1	hf1_eb_18273_84_20032023.ScanId;v=1;d1=18132.18132.2	controllerType=0 controllerNumber=1 scan=18132	44.3362
20582:2	1	M.PLPPHPGHPGYIN[+0.984]FS[+79.966].Y		N[+1], S[+80]	855.886	2	1710.77	1710.77	0	-1.3	18	Non	304.3	302.32	209.03	5.21	1104	>sp|P02817|AMELX_BOVIN Amelogenin, X isoform OS=Bos taurus OX=9913 GN=AMELX PE=1 SV=2	1	hf1_eb_18273_84_20032023.ScanId;v=1;d1=18124.18124.2	controllerType=0 controllerNumber=1 scan=18124	44.3218
20101:2	1	M.PLPPHPGHPGYIN[+0.984]FS[+79.966].Y		N[+1], S[+80]	855.887	2	1710.77	1710.77	0	0	18	Non	541.57	474.81	351.37	7.07	1104	>sp|P02817|AMELX_BOVIN Amelogenin, X isoform OS=Bos taurus OX=9913 GN=AMELX PE=1 SV=2	1	hf1_eb_18273_84_20032023.ScanId;v=1;d1=17778.17778.2	controllerType=0 controllerNumber=1 scan=17778	43.7051
34684:3	1	M.PLPPHPGHPGYIN[+0.984]FS[+79.966]YEVLTPL.K		N[+1], S[+80]	842.742	3	2526.21	2526.21	0	0.3	18	Non	168.39	168.39	9.36	2.96	1104	>sp|P02817|AMELX_BOVIN Amelogenin, X isoform OS=Bos taurus OX=9913 GN=AMELX PE=1 SV=2	1	hf1_eb_18273_84_20032023.ScanId;v=1;d1=27954.27954.3	controllerType=0 controllerNumber=1 scan=27954	61.8241
27699:4	1	M.PLPPHPGHPGYIN[+0.984]FSYEVLTPLK.W		N[+1]	644.34	4	2574.34	2574.34	0	-1.1	18	NRagged	181.3	181.3	181.3	3.82	1104	>sp|P02817|AMELX_BOVIN Amelogenin, X isoform OS=Bos taurus OX=9913 GN=AMELX PE=1 SV=2	1	hf1_eb_18273_84_20032023.ScanId;v=1;d1=23120.23120.4	controllerType=0 controllerNumber=1 scan=23120	53.1874
28504:3	1	M.PLPPHPGHPGYINFS[+79.966]YEVLTPLK.W		S[+80]	885.111	3	2653.32	2653.32	0	-1.6	18	NRagged	586.01	586.01	233.99	8.8	1104	>sp|P02817|AMELX_BOVIN Amelogenin, X isoform OS=Bos taurus OX=9913 GN=AMELX PE=1 SV=2	1	hf1_eb_18273_84_20032023.ScanId;v=1;d1=23684.23684.3	controllerType=0 controllerNumber=1 scan=23684	54.1767
28228:3	1	M.PLPPHPGHPGYINFS[+79.966]YEVLTPLK.W		S[+80]	885.112	3	2653.32	2653.32	0	-0.4	18	NRagged	592.64	592.64	256.14	9.02	1104	>sp|P02817|AMELX_BOVIN Amelogenin, X isoform OS=Bos taurus OX=9913 GN=AMELX PE=1 SV=2	1	hf1_eb_18273_84_20032023.ScanId;v=1;d1=23489.23489.3	controllerType=0 controllerNumber=1 scan=23489	53.8268
29020:4	1	M.PLPPHPGHPGYIN[+0.984]FS[+79.966]YEVLTPLK.W		N[+1], S[+80]	664.33	4	2654.3	2654.31	0	-2.4	18	NRagged	282.8	282.8	113.32	5.96	1104	>sp|P02817|AMELX_BOVIN Amelogenin, X isoform OS=Bos taurus OX=9913 GN=AMELX PE=1 SV=2	1	hf1_eb_18273_84_20032023.ScanId;v=1;d1=24042.24042.4	controllerType=0 controllerNumber=1 scan=24042	54.8105
28229:3	1	M.PLPPHPGHPGYIN[+0.984]FS[+79.966]YEVLTPLK.W		N[+1], S[+80]	885.444	3	2654.32	2654.31	0	4.9	18	NRagged	402.83	402.83	218.46	6.68	1104	>sp|P02817|AMELX_BOVIN Amelogenin, X isoform OS=Bos taurus OX=9913 GN=AMELX PE=1 SV=2	1	hf1_eb_18273_84_20032023.ScanId;v=1;d1=23489.23489.3	controllerType=0 controllerNumber=1 scan=23489	53.8268
28994:3	1	M.PLPPHPGHPGYIN[+0.984]FS[+79.966]YEVLTPLK.W		N[+1], S[+80]	885.439	3	2654.3	2654.31	0	-0.7	18	NRagged	596.67	596.67	263.81	9.02	1104	>sp|P02817|AMELX_BOVIN Amelogenin, X isoform OS=Bos taurus OX=9913 GN=AMELX PE=1 SV=2	1	hf1_eb_18273_84_20032023.ScanId;v=1;d1=24025.24025.3	controllerType=0 controllerNumber=1 scan=24025	54.7796
29294:3	1	M.PLPPHPGHPGYIN[+0.984]FS[+79.966]YEVLTPLK.W		N[+1], S[+80]	885.439	3	2654.3	2654.31	0	-1.1	18	NRagged	692.95	692.95	303.6	11.02	1104	>sp|P02817|AMELX_BOVIN Amelogenin, X isoform OS=Bos taurus OX=9913 GN=AMELX PE=1 SV=2	1	hf1_eb_18273_84_20032023.ScanId;v=1;d1=24225.24225.3	controllerType=0 controllerNumber=1 scan=24225	55.136
28484:3	1	M.PLPP[+31.990]HPGHPGYINFS[+79.966]YEVLTPLKWY[+15.995].Q		P[+32], S[+80], Y[+16]	1017.49	3	3050.45	3050.45	0	0.3	18	Non	39.96	39.96	0	2.62	1104	>sp|P02817|AMELX_BOVIN Amelogenin, X isoform OS=Bos taurus OX=9913 GN=AMELX PE=1 SV=2	1	hf1_eb_18273_84_20032023.ScanId;v=1;d1=23669.23669.3	controllerType=0 controllerNumber=1 scan=23669	54.1495
01967:1	1	P.LPPH.P			463.265	1	463.265	463.266	0	-2.6	19	Non	219.07	116.31	116.31	0.82	1104	>sp|P02817|AMELX_BOVIN Amelogenin, X isoform OS=Bos taurus OX=9913 GN=AMELX PE=1 SV=2	1	hf1_eb_18273_84_20032023.ScanId;v=1;d1=3876.3876.2	controllerType=0 controllerNumber=1 scan=3876	17.0999
03545:1	1	P.LPPHP.G			560.318	1	560.318	560.319	0	-1.7	19	Non	246.55	10.66	10.66	1.83	1104	>sp|P02817|AMELX_BOVIN Amelogenin, X isoform OS=Bos taurus OX=9913 GN=AMELX PE=1 SV=2	1	hf1_eb_18273_84_20032023.ScanId;v=1;d1=5133.5133.2	controllerType=0 controllerNumber=1 scan=5133	19.5268
03573:1	1	P.LPPHP.G			560.318	1	560.318	560.319	0	-1.6	19	Non	262.25	46.73	46.73	2.26	1104	>sp|P02817|AMELX_BOVIN Amelogenin, X isoform OS=Bos taurus OX=9913 GN=AMELX PE=1 SV=2	1	hf1_eb_18273_84_20032023.ScanId;v=1;d1=5159.5159.2	controllerType=0 controllerNumber=1 scan=5159	19.5859
09133:1	1	P.LPPH[+15.995]P.G		H[+16]	576.314	1	576.314	576.314	0	-0.7	19	Non	245.42	104.84	17.27	2.13	1104	>sp|P02817|AMELX_BOVIN Amelogenin, X isoform OS=Bos taurus OX=9913 GN=AMELX PE=1 SV=2	1	hf1_eb_18273_84_20032023.ScanId;v=1;d1=9693.9693.2	controllerType=0 controllerNumber=1 scan=9693	28.965
07230:1	1	P.LPPH[+15.995]PG.H		H[+16]	633.335	1	633.335	633.336	0	-0.9	19	Non	189.79	189.79	18.72	2.37	1104	>sp|P02817|AMELX_BOVIN Amelogenin, X isoform OS=Bos taurus OX=9913 GN=AMELX PE=1 SV=2	1	hf1_eb_18273_84_20032023.ScanId;v=1;d1=8211.8211.2	controllerType=0 controllerNumber=1 scan=8211	26.0521
05715:1	1	P.LPP[+31.990]HPG.H		P[+32]	649.328	1	649.328	649.33	0	-3.4	19	Non	201.64	196.73	20	1.49	1104	>sp|P02817|AMELX_BOVIN Amelogenin, X isoform OS=Bos taurus OX=9913 GN=AMELX PE=1 SV=2	1	hf1_eb_18273_84_20032023.ScanId;v=1;d1=6973.6973.3	controllerType=0 controllerNumber=1 scan=6973	23.5262
06522:1	1	P.LPP[+31.990]HPG.H		P[+32]	649.329	1	649.329	649.33	0	-2.1	19	Non	240.37	225.6	30.64	3.45	1104	>sp|P02817|AMELX_BOVIN Amelogenin, X isoform OS=Bos taurus OX=9913 GN=AMELX PE=1 SV=2	1	hf1_eb_18273_84_20032023.ScanId;v=1;d1=7625.7625.2	controllerType=0 controllerNumber=1 scan=7625	24.81
07059:1	1	P.LPPH[+15.995]PG.H		H[+16]	633.335	1	633.335	633.336	0	-0.6	19	Non	242.17	242.17	7.87	3.7	1104	>sp|P02817|AMELX_BOVIN Amelogenin, X isoform OS=Bos taurus OX=9913 GN=AMELX PE=1 SV=2	1	hf1_eb_18273_84_20032023.ScanId;v=1;d1=8074.8074.2	controllerType=0 controllerNumber=1 scan=8074	25.7705
06712:1	1	P.LPP[+31.990]HPG.H		P[+32]	649.33	1	649.33	649.33	0	-0.6	19	Non	244.81	244.81	37.04	3.12	1104	>sp|P02817|AMELX_BOVIN Amelogenin, X isoform OS=Bos taurus OX=9913 GN=AMELX PE=1 SV=2	1	hf1_eb_18273_84_20032023.ScanId;v=1;d1=7789.7789.2	controllerType=0 controllerNumber=1 scan=7789	25.1872
06099:1	1	P.LPP[+31.990]HPG.H		P[+32]	649.33	1	649.33	649.33	0	-0.4	19	Non	304.59	304.59	20	4.19	1104	>sp|P02817|AMELX_BOVIN Amelogenin, X isoform OS=Bos taurus OX=9913 GN=AMELX PE=1 SV=2	1	hf1_eb_18273_84_20032023.ScanId;v=1;d1=7286.7286.3	controllerType=0 controllerNumber=1 scan=7286	24.136
03008:2	1	P.LPPHPGH.P			377.703	2	754.398	754.399	0	-1.4	19	Non	217.51	206.26	206.26	2.43	1104	>sp|P02817|AMELX_BOVIN Amelogenin, X isoform OS=Bos taurus OX=9913 GN=AMELX PE=1 SV=2	1	hf1_eb_18273_84_20032023.ScanId;v=1;d1=4696.4696.2	controllerType=0 controllerNumber=1 scan=4696	18.657
01545:2	1	P.LPPHPGH.P			377.702	2	754.398	754.399	0	-2.2	19	Non	228.66	228.66	228.66	2.3	1104	>sp|P02817|AMELX_BOVIN Amelogenin, X isoform OS=Bos taurus OX=9913 GN=AMELX PE=1 SV=2	1	hf1_eb_18273_84_20032023.ScanId;v=1;d1=3562.3562.2	controllerType=0 controllerNumber=1 scan=3562	16.5457
02727:2	1	P.LPPHPGH.P			377.702	2	754.397	754.399	0	-2.7	19	Non	266.53	208.35	208.35	3.76	1104	>sp|P02817|AMELX_BOVIN Amelogenin, X isoform OS=Bos taurus OX=9913 GN=AMELX PE=1 SV=2	1	hf1_eb_18273_84_20032023.ScanId;v=1;d1=4454.4454.2	controllerType=0 controllerNumber=1 scan=4454	18.1474
02182:2	1	P.LPPHPGH.P			377.702	2	754.398	754.399	0	-2.6	19	Non	268.71	240	240	4.19	1104	>sp|P02817|AMELX_BOVIN Amelogenin, X isoform OS=Bos taurus OX=9913 GN=AMELX PE=1 SV=2	1	hf1_eb_18273_84_20032023.ScanId;v=1;d1=4043.4043.2	controllerType=0 controllerNumber=1 scan=4043	17.402
02450:2	1	P.LPPHPGH.P			377.702	2	754.398	754.399	0	-2.3	19	Non	356.55	280.21	280.21	4.61	1104	>sp|P02817|AMELX_BOVIN Amelogenin, X isoform OS=Bos taurus OX=9913 GN=AMELX PE=1 SV=2	1	hf1_eb_18273_84_20032023.ScanId;v=1;d1=4236.4236.2	controllerType=0 controllerNumber=1 scan=4236	17.7518
02689:2	1	P.LPPHPGH.P			377.702	2	754.398	754.399	0	-2.3	19	Non	361.49	280.68	280.68	4.8	1104	>sp|P02817|AMELX_BOVIN Amelogenin, X isoform OS=Bos taurus OX=9913 GN=AMELX PE=1 SV=2	1	hf1_eb_18273_84_20032023.ScanId;v=1;d1=4424.4424.2	controllerType=0 controllerNumber=1 scan=4424	18.0905
02116:2	1	P.LPPHPGH.P			377.703	2	754.398	754.399	0	-2	19	Non	395.79	370.53	370.53	6.42	1104	>sp|P02817|AMELX_BOVIN Amelogenin, X isoform OS=Bos taurus OX=9913 GN=AMELX PE=1 SV=2	1	hf1_eb_18273_84_20032023.ScanId;v=1;d1=3992.3992.2	controllerType=0 controllerNumber=1 scan=3992	17.3109
04573:2	1	P.LPPH[+15.995]PGH.P		H[+16]	385.7	2	770.394	770.394	0	-1.1	19	Non	259.74	226.68	4.63	4.3	1104	>sp|P02817|AMELX_BOVIN Amelogenin, X isoform OS=Bos taurus OX=9913 GN=AMELX PE=1 SV=2	1	hf1_eb_18273_84_20032023.ScanId;v=1;d1=6006.6006.2	controllerType=0 controllerNumber=1 scan=6006	21.4641
03639:2	1	P.LPPHPGHP.G			426.229	2	851.45	851.452	0	-2.8	19	Non	363.09	71.91	71.91	3.23	1104	>sp|P02817|AMELX_BOVIN Amelogenin, X isoform OS=Bos taurus OX=9913 GN=AMELX PE=1 SV=2	1	hf1_eb_18273_84_20032023.ScanId;v=1;d1=5212.5212.2	controllerType=0 controllerNumber=1 scan=5212	19.6862
03756:2	1	P.LPPHPGHP.G			426.229	2	851.45	851.452	0	-2.4	19	Non	416.78	149.78	149.78	3.88	1104	>sp|P02817|AMELX_BOVIN Amelogenin, X isoform OS=Bos taurus OX=9913 GN=AMELX PE=1 SV=2	1	hf1_eb_18273_84_20032023.ScanId;v=1;d1=5312.5312.2	controllerType=0 controllerNumber=1 scan=5312	19.9119
03311:2	1	P.LPPHPGHP.G			426.229	2	851.451	851.452	0	-1.9	19	Non	488.9	178.04	178.04	4.99	1104	>sp|P02817|AMELX_BOVIN Amelogenin, X isoform OS=Bos taurus OX=9913 GN=AMELX PE=1 SV=2	1	hf1_eb_18273_84_20032023.ScanId;v=1;d1=4936.4936.2	controllerType=0 controllerNumber=1 scan=4936	19.1179
03082:2	1	P.LPPHPGHP.G			426.229	2	851.451	851.452	0	-1.7	19	Non	491.11	194.57	194.57	4.99	1104	>sp|P02817|AMELX_BOVIN Amelogenin, X isoform OS=Bos taurus OX=9913 GN=AMELX PE=1 SV=2	1	hf1_eb_18273_84_20032023.ScanId;v=1;d1=4754.4754.2	controllerType=0 controllerNumber=1 scan=4754	18.7733
03504:2	1	P.LPPHPGHP.G			426.229	2	851.45	851.452	0	-2.3	19	Non	531.52	191.6	191.6	5.03	1104	>sp|P02817|AMELX_BOVIN Amelogenin, X isoform OS=Bos taurus OX=9913 GN=AMELX PE=1 SV=2	1	hf1_eb_18273_84_20032023.ScanId;v=1;d1=5101.5101.2	controllerType=0 controllerNumber=1 scan=5101	19.4647
02621:2	1	P.LPPHPGHP[+15.995].G		P[+16]	434.226	2	867.446	867.447	0	-1.6	19	Non	179.03	106.71	22.09	1.45	1104	>sp|P02817|AMELX_BOVIN Amelogenin, X isoform OS=Bos taurus OX=9913 GN=AMELX PE=1 SV=2	1	hf1_eb_18273_84_20032023.ScanId;v=1;d1=4372.4372.2	controllerType=0 controllerNumber=1 scan=4372	17.9942
04125:2	1	P.LPPHPGHPG.Y			454.741	2	908.475	908.474	0	1.4	19	Non	334.53	334.53	334.53	4.71	1104	>sp|P02817|AMELX_BOVIN Amelogenin, X isoform OS=Bos taurus OX=9913 GN=AMELX PE=1 SV=2	1	hf1_eb_18273_84_20032023.ScanId;v=1;d1=5638.5638.2	controllerType=0 controllerNumber=1 scan=5638	20.6855
04550:2	1	P.LPPHPGHPG.Y			454.741	2	908.475	908.474	0	1.1	19	Non	339.51	332.69	332.69	4.71	1104	>sp|P02817|AMELX_BOVIN Amelogenin, X isoform OS=Bos taurus OX=9913 GN=AMELX PE=1 SV=2	1	hf1_eb_18273_84_20032023.ScanId;v=1;d1=5986.5986.2	controllerType=0 controllerNumber=1 scan=5986	21.4214
02173:2	1	P.LPPHPGHPG.Y			454.74	2	908.473	908.474	0	-0.7	19	Non	425.94	415.51	415.51	5.96	1104	>sp|P02817|AMELX_BOVIN Amelogenin, X isoform OS=Bos taurus OX=9913 GN=AMELX PE=1 SV=2	1	hf1_eb_18273_84_20032023.ScanId;v=1;d1=4037.4037.2	controllerType=0 controllerNumber=1 scan=4037	17.392
02587:2	1	P.LPPHPGHPG.Y			454.74	2	908.472	908.474	0	-1.8	19	Non	520.14	450.77	450.77	6.47	1104	>sp|P02817|AMELX_BOVIN Amelogenin, X isoform OS=Bos taurus OX=9913 GN=AMELX PE=1 SV=2	1	hf1_eb_18273_84_20032023.ScanId;v=1;d1=4346.4346.2	controllerType=0 controllerNumber=1 scan=4346	17.9509
03418:2	1	P.LPPHPGHPG.Y			454.74	2	908.472	908.474	0	-2.1	19	Non	528.98	449.88	449.88	6.47	1104	>sp|P02817|AMELX_BOVIN Amelogenin, X isoform OS=Bos taurus OX=9913 GN=AMELX PE=1 SV=2	1	hf1_eb_18273_84_20032023.ScanId;v=1;d1=5031.5031.2	controllerType=0 controllerNumber=1 scan=5031	19.313
02991:2	1	P.LPPHPGHPG.Y			454.74	2	908.473	908.474	0	-0.6	19	Non	535.39	501.72	501.72	6.69	1104	>sp|P02817|AMELX_BOVIN Amelogenin, X isoform OS=Bos taurus OX=9913 GN=AMELX PE=1 SV=2	1	hf1_eb_18273_84_20032023.ScanId;v=1;d1=4683.4683.2	controllerType=0 controllerNumber=1 scan=4683	18.6324
03223:2	1	P.LPPHPGHPG.Y			454.74	2	908.472	908.474	0	-1.7	19	Non	552.89	493.53	493.53	6.47	1104	>sp|P02817|AMELX_BOVIN Amelogenin, X isoform OS=Bos taurus OX=9913 GN=AMELX PE=1 SV=2	1	hf1_eb_18273_84_20032023.ScanId;v=1;d1=4863.4863.2	controllerType=0 controllerNumber=1 scan=4863	18.9734
02795:2	1	P.LPPHPGHPG.Y			454.74	2	908.472	908.474	0	-1.4	19	Non	553.22	515.52	515.52	6.69	1104	>sp|P02817|AMELX_BOVIN Amelogenin, X isoform OS=Bos taurus OX=9913 GN=AMELX PE=1 SV=2	1	hf1_eb_18273_84_20032023.ScanId;v=1;d1=4518.4518.2	controllerType=0 controllerNumber=1 scan=4518	18.2918
06568:2	1	P.LPPH[+15.995]PGHPG.Y		H[+16]	462.736	2	924.465	924.469	0	-4	19	Non	222.61	222.61	0.48	2.19	1104	>sp|P02817|AMELX_BOVIN Amelogenin, X isoform OS=Bos taurus OX=9913 GN=AMELX PE=1 SV=2	1	hf1_eb_18273_84_20032023.ScanId;v=1;d1=7674.7674.2	controllerType=0 controllerNumber=1 scan=7674	24.9521
04715:2	1	P.LPPHP[+31.990]GHPG.Y		P[+32]	470.739	2	940.47	940.463	0	7.2	19	Non	273.8	270.22	20	2.67	1104	>sp|P02817|AMELX_BOVIN Amelogenin, X isoform OS=Bos taurus OX=9913 GN=AMELX PE=1 SV=2	1	hf1_eb_18273_84_20032023.ScanId;v=1;d1=6116.6116.2	controllerType=0 controllerNumber=1 scan=6116	21.6729
06391:2	1	P.LPPHP[+15.995]GHPG.Y		P[+16]	462.737	2	924.467	924.469	0	-1.7	19	Non	314.72	314.72	7.58	4.72	1104	>sp|P02817|AMELX_BOVIN Amelogenin, X isoform OS=Bos taurus OX=9913 GN=AMELX PE=1 SV=2	1	hf1_eb_18273_84_20032023.ScanId;v=1;d1=7523.7523.2	controllerType=0 controllerNumber=1 scan=7523	24.6147
05563:2	1	P.LPPHP[+31.990]GHPG.Y		P[+32]	470.735	2	940.463	940.463	0	-0.3	19	Non	353.6	320.71	31.75	4.94	1104	>sp|P02817|AMELX_BOVIN Amelogenin, X isoform OS=Bos taurus OX=9913 GN=AMELX PE=1 SV=2	1	hf1_eb_18273_84_20032023.ScanId;v=1;d1=6836.6836.2	controllerType=0 controllerNumber=1 scan=6836	23.2273
05209:2	1	P.LPPHP[+31.990]GHPG.Y		P[+32]	470.735	2	940.462	940.463	0	-1.8	19	Non	406.56	307.27	33.09	4.71	1104	>sp|P02817|AMELX_BOVIN Amelogenin, X isoform OS=Bos taurus OX=9913 GN=AMELX PE=1 SV=2	1	hf1_eb_18273_84_20032023.ScanId;v=1;d1=6534.6534.2	controllerType=0 controllerNumber=1 scan=6534	22.5597
02221:2	1	P.LPPHPGHP[+15.995]G.Y		P[+16]	462.737	2	924.467	924.469	0	-1.9	19	Non	412.19	272.86	46.4	4.74	1104	>sp|P02817|AMELX_BOVIN Amelogenin, X isoform OS=Bos taurus OX=9913 GN=AMELX PE=1 SV=2	1	hf1_eb_18273_84_20032023.ScanId;v=1;d1=4068.4068.2	controllerType=0 controllerNumber=1 scan=4068	17.4456
01707:2	1	P.LPPHPGHP[+15.995]G.Y		P[+16]	462.737	2	924.467	924.469	0	-1.8	19	Non	414.31	379.07	48.49	5.74	1104	>sp|P02817|AMELX_BOVIN Amelogenin, X isoform OS=Bos taurus OX=9913 GN=AMELX PE=1 SV=2	1	hf1_eb_18273_84_20032023.ScanId;v=1;d1=3680.3680.2	controllerType=0 controllerNumber=1 scan=3680	16.7486
05199:2	1	P.LPPHP[+31.990]GHPG.Y		P[+32]	470.735	2	940.462	940.463	0	-1.4	19	Non	426.4	295.53	32.58	5.09	1104	>sp|P02817|AMELX_BOVIN Amelogenin, X isoform OS=Bos taurus OX=9913 GN=AMELX PE=1 SV=2	1	hf1_eb_18273_84_20032023.ScanId;v=1;d1=6528.6528.2	controllerType=0 controllerNumber=1 scan=6528	22.5487
04821:2	1	P.LPPHP[+31.990]GHPG.Y		P[+32]	470.735	2	940.462	940.463	0	-1.5	19	Non	435.09	359.37	36.9	4.9	1104	>sp|P02817|AMELX_BOVIN Amelogenin, X isoform OS=Bos taurus OX=9913 GN=AMELX PE=1 SV=2	1	hf1_eb_18273_84_20032023.ScanId;v=1;d1=6207.6207.2	controllerType=0 controllerNumber=1 scan=6207	21.8626
05005:2	1	P.LPPHP[+31.990]GHPG.Y		P[+32]	470.735	2	940.462	940.463	0	-1.7	19	Non	456.57	395.27	20	5.77	1104	>sp|P02817|AMELX_BOVIN Amelogenin, X isoform OS=Bos taurus OX=9913 GN=AMELX PE=1 SV=2	1	hf1_eb_18273_84_20032023.ScanId;v=1;d1=6369.6369.2	controllerType=0 controllerNumber=1 scan=6369	22.2166
01968:2	1	P.LPPHPGHP[+15.995]G.Y		P[+16]	462.737	2	924.466	924.469	0	-2.4	19	Non	489.2	382.67	69.77	5.96	1104	>sp|P02817|AMELX_BOVIN Amelogenin, X isoform OS=Bos taurus OX=9913 GN=AMELX PE=1 SV=2	1	hf1_eb_18273_84_20032023.ScanId;v=1;d1=3876.3876.2	controllerType=0 controllerNumber=1 scan=3876	17.0999
06207:2	1	P.LPPHPGHPGY.I			536.272	2	1071.54	1071.54	0	0.1	19	Non	161.07	150.39	150.39	1.54	1104	>sp|P02817|AMELX_BOVIN Amelogenin, X isoform OS=Bos taurus OX=9913 GN=AMELX PE=1 SV=2	1	hf1_eb_18273_84_20032023.ScanId;v=1;d1=7375.7375.2	controllerType=0 controllerNumber=1 scan=7375	24.317
06011:2	1	P.LPPHPGHPGY.I			536.272	2	1071.54	1071.54	0	0	19	Non	567.89	438.23	438.23	7.53	1104	>sp|P02817|AMELX_BOVIN Amelogenin, X isoform OS=Bos taurus OX=9913 GN=AMELX PE=1 SV=2	1	hf1_eb_18273_84_20032023.ScanId;v=1;d1=7216.7216.2	controllerType=0 controllerNumber=1 scan=7216	23.9968
05788:2	1	P.LPPHPGHPGY.I			536.272	2	1071.54	1071.54	0	-0.7	19	Non	576.73	431.54	431.54	7.53	1104	>sp|P02817|AMELX_BOVIN Amelogenin, X isoform OS=Bos taurus OX=9913 GN=AMELX PE=1 SV=2	1	hf1_eb_18273_84_20032023.ScanId;v=1;d1=7036.7036.2	controllerType=0 controllerNumber=1 scan=7036	23.6579
05601:2	1	P.LPPHPGHPGY.I			536.271	2	1071.53	1071.54	0	-2.2	19	Non	602.96	469.81	469.81	8.31	1104	>sp|P02817|AMELX_BOVIN Amelogenin, X isoform OS=Bos taurus OX=9913 GN=AMELX PE=1 SV=2	1	hf1_eb_18273_84_20032023.ScanId;v=1;d1=6872.6872.2	controllerType=0 controllerNumber=1 scan=6872	23.3186
05422:2	1	P.LPPHPGHPGY.I			536.271	2	1071.54	1071.54	0	-1.3	19	Non	605.05	436.88	436.88	8.53	1104	>sp|P02817|AMELX_BOVIN Amelogenin, X isoform OS=Bos taurus OX=9913 GN=AMELX PE=1 SV=2	1	hf1_eb_18273_84_20032023.ScanId;v=1;d1=6721.6721.2	controllerType=0 controllerNumber=1 scan=6721	22.9792
10542:2	1	P.LPPHPGHPGYI.N			592.814	2	1184.62	1184.62	0	-0.4	19	Non	153.57	153.57	153.57	1.54	1104	>sp|P02817|AMELX_BOVIN Amelogenin, X isoform OS=Bos taurus OX=9913 GN=AMELX PE=1 SV=2	1	hf1_eb_18273_84_20032023.ScanId;v=1;d1=10766.10766.2	controllerType=0 controllerNumber=1 scan=10766	30.9775
10715:3	1	P.LPPHPGHPGYI.N			395.545	3	1184.62	1184.62	0	-0.6	19	Non	197.96	197.96	197.96	2.47	1104	>sp|P02817|AMELX_BOVIN Amelogenin, X isoform OS=Bos taurus OX=9913 GN=AMELX PE=1 SV=2	1	hf1_eb_18273_84_20032023.ScanId;v=1;d1=10888.10888.3	controllerType=0 controllerNumber=1 scan=10888	31.1993
09716:3	1	P.LPPHPGHPGYI.N			395.545	3	1184.62	1184.62	0	-1.3	19	Non	345.51	345.51	345.51	5.19	1104	>sp|P02817|AMELX_BOVIN Amelogenin, X isoform OS=Bos taurus OX=9913 GN=AMELX PE=1 SV=2	1	hf1_eb_18273_84_20032023.ScanId;v=1;d1=10139.10139.3	controllerType=0 controllerNumber=1 scan=10139	29.8089
10186:2	1	P.LPPHPGHPGYI.N			592.814	2	1184.62	1184.62	0	-0.8	19	Non	351.72	292.16	292.16	5.2	1104	>sp|P02817|AMELX_BOVIN Amelogenin, X isoform OS=Bos taurus OX=9913 GN=AMELX PE=1 SV=2	1	hf1_eb_18273_84_20032023.ScanId;v=1;d1=10500.10500.2	controllerType=0 controllerNumber=1 scan=10500	30.4902
10194:3	1	P.LPPHPGHPGYI.N			395.545	3	1184.62	1184.62	0	-0.5	19	Non	364.18	364.18	364.18	5.79	1104	>sp|P02817|AMELX_BOVIN Amelogenin, X isoform OS=Bos taurus OX=9913 GN=AMELX PE=1 SV=2	1	hf1_eb_18273_84_20032023.ScanId;v=1;d1=10506.10506.3	controllerType=0 controllerNumber=1 scan=10506	30.502
09959:3	1	P.LPPHPGHPGYI.N			395.545	3	1184.62	1184.62	0	-1.1	19	Non	402.19	402.19	402.19	5.8	1104	>sp|P02817|AMELX_BOVIN Amelogenin, X isoform OS=Bos taurus OX=9913 GN=AMELX PE=1 SV=2	1	hf1_eb_18273_84_20032023.ScanId;v=1;d1=10321.10321.3	controllerType=0 controllerNumber=1 scan=10321	30.1503
10439:3	1	P.LPPHPGHPGYI.N			395.545	3	1184.62	1184.62	0	-0.1	19	Non	409.23	409.23	409.23	5.8	1104	>sp|P02817|AMELX_BOVIN Amelogenin, X isoform OS=Bos taurus OX=9913 GN=AMELX PE=1 SV=2	1	hf1_eb_18273_84_20032023.ScanId;v=1;d1=10690.10690.3	controllerType=0 controllerNumber=1 scan=10690	30.8393
09930:2	1	P.LPPHPGHPGYI.N			592.813	2	1184.62	1184.62	0	-1.1	19	Non	531	390.02	390.02	6.39	1104	>sp|P02817|AMELX_BOVIN Amelogenin, X isoform OS=Bos taurus OX=9913 GN=AMELX PE=1 SV=2	1	hf1_eb_18273_84_20032023.ScanId;v=1;d1=10299.10299.2	controllerType=0 controllerNumber=1 scan=10299	30.11
08145:3	1	P.LPPHPGHPGYIN.F			433.559	3	1298.66	1298.66	0	-0.5	19	Non	182.82	182.82	182.82	2.47	1104	>sp|P02817|AMELX_BOVIN Amelogenin, X isoform OS=Bos taurus OX=9913 GN=AMELX PE=1 SV=2	1	hf1_eb_18273_84_20032023.ScanId;v=1;d1=8935.8935.3	controllerType=0 controllerNumber=1 scan=8935	27.4668
08387:3	1	P.LPPHPGHPGYIN.F			433.559	3	1298.66	1298.66	0	-0.7	19	Non	190.53	190.53	190.53	2.47	1104	>sp|P02817|AMELX_BOVIN Amelogenin, X isoform OS=Bos taurus OX=9913 GN=AMELX PE=1 SV=2	1	hf1_eb_18273_84_20032023.ScanId;v=1;d1=9115.9115.3	controllerType=0 controllerNumber=1 scan=9115	27.8128
07924:2	1	P.LPPHPGHPGYIN.F			649.835	2	1298.66	1298.66	0	-1.2	19	Non	352.42	330.58	330.58	5.28	1104	>sp|P02817|AMELX_BOVIN Amelogenin, X isoform OS=Bos taurus OX=9913 GN=AMELX PE=1 SV=2	1	hf1_eb_18273_84_20032023.ScanId;v=1;d1=8757.8757.2	controllerType=0 controllerNumber=1 scan=8757	27.1247
08330:2	1	P.LPPHPGHPGYIN.F			649.835	2	1298.66	1298.66	0	-1	19	Non	400.68	358.67	358.67	5.29	1104	>sp|P02817|AMELX_BOVIN Amelogenin, X isoform OS=Bos taurus OX=9913 GN=AMELX PE=1 SV=2	1	hf1_eb_18273_84_20032023.ScanId;v=1;d1=9070.9070.2	controllerType=0 controllerNumber=1 scan=9070	27.726
08100:2	1	P.LPPHPGHPGYIN.F			649.835	2	1298.66	1298.66	0	-0.6	19	Non	501.17	401.12	401.12	6.34	1104	>sp|P02817|AMELX_BOVIN Amelogenin, X isoform OS=Bos taurus OX=9913 GN=AMELX PE=1 SV=2	1	hf1_eb_18273_84_20032023.ScanId;v=1;d1=8896.8896.2	controllerType=0 controllerNumber=1 scan=8896	27.3826
09956:2	1	P.LPPHPGHPGYIN[+0.984].F		N[+1]	650.327	2	1299.65	1299.65	0	-1.3	19	Non	269.92	258.23	258.23	4.51	1104	>sp|P02817|AMELX_BOVIN Amelogenin, X isoform OS=Bos taurus OX=9913 GN=AMELX PE=1 SV=2	1	hf1_eb_18273_84_20032023.ScanId;v=1;d1=10318.10318.2	controllerType=0 controllerNumber=1 scan=10318	30.1431
08781:3	1	P.LPPHPGHPGYIN[+0.984].F		N[+1]	433.887	3	1299.65	1299.65	0	-1	19	Non	284.06	284.06	284.06	4.79	1104	>sp|P02817|AMELX_BOVIN Amelogenin, X isoform OS=Bos taurus OX=9913 GN=AMELX PE=1 SV=2	1	hf1_eb_18273_84_20032023.ScanId;v=1;d1=9427.9427.3	controllerType=0 controllerNumber=1 scan=9427	28.4409
09236:3	1	P.LPPHPGHPGYIN[+0.984].F		N[+1]	433.888	3	1299.65	1299.65	0	0.8	19	Non	301.24	301.24	301.24	4.51	1104	>sp|P02817|AMELX_BOVIN Amelogenin, X isoform OS=Bos taurus OX=9913 GN=AMELX PE=1 SV=2	1	hf1_eb_18273_84_20032023.ScanId;v=1;d1=9771.9771.3	controllerType=0 controllerNumber=1 scan=9771	29.1209
09471:3	1	P.LPPHPGHPGYIN[+0.984].F		N[+1]	433.887	3	1299.65	1299.65	0	-0.2	19	Non	389.05	375.44	375.44	6.49	1104	>sp|P02817|AMELX_BOVIN Amelogenin, X isoform OS=Bos taurus OX=9913 GN=AMELX PE=1 SV=2	1	hf1_eb_18273_84_20032023.ScanId;v=1;d1=9955.9955.3	controllerType=0 controllerNumber=1 scan=9955	29.4654
09008:3	1	P.LPPHPGHPGYIN[+0.984].F		N[+1]	433.888	3	1299.65	1299.65	0	0.4	19	Non	406.57	406.57	406.57	6.16	1104	>sp|P02817|AMELX_BOVIN Amelogenin, X isoform OS=Bos taurus OX=9913 GN=AMELX PE=1 SV=2	1	hf1_eb_18273_84_20032023.ScanId;v=1;d1=9599.9599.3	controllerType=0 controllerNumber=1 scan=9599	28.7831
08751:2	1	P.LPPHPGHPGYIN[+0.984].F		N[+1]	650.327	2	1299.65	1299.65	0	-1	19	Non	442.12	380.88	380.88	5.99	1104	>sp|P02817|AMELX_BOVIN Amelogenin, X isoform OS=Bos taurus OX=9913 GN=AMELX PE=1 SV=2	1	hf1_eb_18273_84_20032023.ScanId;v=1;d1=9405.9405.2	controllerType=0 controllerNumber=1 scan=9405	28.4016
09685:2	1	P.LPPHPGHPGYIN[+0.984].F		N[+1]	650.327	2	1299.65	1299.65	0	-1.4	19	Non	537.77	422.02	422.02	6.16	1104	>sp|P02817|AMELX_BOVIN Amelogenin, X isoform OS=Bos taurus OX=9913 GN=AMELX PE=1 SV=2	1	hf1_eb_18273_84_20032023.ScanId;v=1;d1=10116.10116.2	controllerType=0 controllerNumber=1 scan=10116	29.7652
09214:2	1	P.LPPHPGHPGYIN[+0.984].F		N[+1]	650.327	2	1299.65	1299.65	0	-0.8	19	Non	585.99	508.12	508.12	7.53	1104	>sp|P02817|AMELX_BOVIN Amelogenin, X isoform OS=Bos taurus OX=9913 GN=AMELX PE=1 SV=2	1	hf1_eb_18273_84_20032023.ScanId;v=1;d1=9753.9753.2	controllerType=0 controllerNumber=1 scan=9753	29.0841
09439:2	1	P.LPPHPGHPGYIN[+0.984].F		N[+1]	650.327	2	1299.65	1299.65	0	-0.5	19	Non	589.51	500.88	500.88	7.53	1104	>sp|P02817|AMELX_BOVIN Amelogenin, X isoform OS=Bos taurus OX=9913 GN=AMELX PE=1 SV=2	1	hf1_eb_18273_84_20032023.ScanId;v=1;d1=9931.9931.2	controllerType=0 controllerNumber=1 scan=9931	29.4196
08983:2	1	P.LPPHPGHPGYIN[+0.984].F		N[+1]	650.327	2	1299.65	1299.65	0	-1.3	19	Non	606.85	537.49	537.49	8.53	1104	>sp|P02817|AMELX_BOVIN Amelogenin, X isoform OS=Bos taurus OX=9913 GN=AMELX PE=1 SV=2	1	hf1_eb_18273_84_20032023.ScanId;v=1;d1=9578.9578.2	controllerType=0 controllerNumber=1 scan=9578	28.7425
12238:2	1	P.LPPHP[+31.990]GHPGYIN[+0.984].F		N[+1], P[+32]	666.323	2	1331.64	1331.64	0	0	19	Non	219.31	164.93	25.05	2.29	1104	>sp|P02817|AMELX_BOVIN Amelogenin, X isoform OS=Bos taurus OX=9913 GN=AMELX PE=1 SV=2	1	hf1_eb_18273_84_20032023.ScanId;v=1;d1=12021.12021.2	controllerType=0 controllerNumber=1 scan=12021	33.2971
12642:2	1	P.LPP[+31.990]HPGHPGYIN[+0.984].F		N[+1], P[+32]	666.322	2	1331.64	1331.64	0	-0.3	19	Non	238.95	181.5	52.51	2.29	1104	>sp|P02817|AMELX_BOVIN Amelogenin, X isoform OS=Bos taurus OX=9913 GN=AMELX PE=1 SV=2	1	hf1_eb_18273_84_20032023.ScanId;v=1;d1=12305.12305.2	controllerType=0 controllerNumber=1 scan=12305	33.8176
12353:2	1	P.LPP[+31.990]HPGHPGYIN[+0.984].F		N[+1], P[+32]	666.323	2	1331.64	1331.64	0	0.2	19	Non	248.81	178.48	10.26	3.75	1104	>sp|P02817|AMELX_BOVIN Amelogenin, X isoform OS=Bos taurus OX=9913 GN=AMELX PE=1 SV=2	1	hf1_eb_18273_84_20032023.ScanId;v=1;d1=12108.12108.2	controllerType=0 controllerNumber=1 scan=12108	33.4611
15526:3	1	P.LPPHPGHPGYINF.S			482.581	3	1445.73	1445.73	0	-2.7	19	Non	174.08	174.08	174.08	2.14	1104	>sp|P02817|AMELX_BOVIN Amelogenin, X isoform OS=Bos taurus OX=9913 GN=AMELX PE=1 SV=2	1	hf1_eb_18273_84_20032023.ScanId;v=1;d1=14390.14390.3	controllerType=0 controllerNumber=1 scan=14390	37.6224
16100:3	1	P.LPPHPGHPGYINF.S			482.582	3	1445.73	1445.73	0	-1	19	Non	207.46	207.46	207.46	2.97	1104	>sp|P02817|AMELX_BOVIN Amelogenin, X isoform OS=Bos taurus OX=9913 GN=AMELX PE=1 SV=2	1	hf1_eb_18273_84_20032023.ScanId;v=1;d1=14798.14798.3	controllerType=0 controllerNumber=1 scan=14798	38.335
15819:3	1	P.LPPHPGHPGYINF.S			482.582	3	1445.73	1445.73	0	-0.9	19	Non	209.16	209.16	209.16	2.97	1104	>sp|P02817|AMELX_BOVIN Amelogenin, X isoform OS=Bos taurus OX=9913 GN=AMELX PE=1 SV=2	1	hf1_eb_18273_84_20032023.ScanId;v=1;d1=14597.14597.3	controllerType=0 controllerNumber=1 scan=14597	37.9792
15282:3	1	P.LPPHPGHPGYINF.S			482.581	3	1445.73	1445.73	0	-3.7	19	Non	240.79	240.79	240.79	3.06	1104	>sp|P02817|AMELX_BOVIN Amelogenin, X isoform OS=Bos taurus OX=9913 GN=AMELX PE=1 SV=2	1	hf1_eb_18273_84_20032023.ScanId;v=1;d1=14210.14210.3	controllerType=0 controllerNumber=1 scan=14210	37.2846
16629:3	1	P.LPPHPGHPGYINF.S			482.582	3	1445.73	1445.73	0	-1.2	19	Non	295.83	295.83	295.83	5	1104	>sp|P02817|AMELX_BOVIN Amelogenin, X isoform OS=Bos taurus OX=9913 GN=AMELX PE=1 SV=2	1	hf1_eb_18273_84_20032023.ScanId;v=1;d1=15175.15175.3	controllerType=0 controllerNumber=1 scan=15175	38.9873
16121:2	1	P.LPPHPGHPGYINF.S			723.37	2	1445.73	1445.73	0	-0.2	19	Non	408.64	408.64	408.64	6.27	1104	>sp|P02817|AMELX_BOVIN Amelogenin, X isoform OS=Bos taurus OX=9913 GN=AMELX PE=1 SV=2	1	hf1_eb_18273_84_20032023.ScanId;v=1;d1=14811.14811.2	controllerType=0 controllerNumber=1 scan=14811	38.3563
16503:2	1	P.LPPHPGHPGYINF.S			723.368	2	1445.73	1445.73	0	-2.2	19	Non	475.2	450.72	450.72	6.37	1104	>sp|P02817|AMELX_BOVIN Amelogenin, X isoform OS=Bos taurus OX=9913 GN=AMELX PE=1 SV=2	1	hf1_eb_18273_84_20032023.ScanId;v=1;d1=15082.15082.2	controllerType=0 controllerNumber=1 scan=15082	38.8236
16205:2	1	P.LPPHPGHPGYINF.S			723.37	2	1445.73	1445.73	0	0.1	19	Non	482.31	469.69	469.69	6.26	1104	>sp|P02817|AMELX_BOVIN Amelogenin, X isoform OS=Bos taurus OX=9913 GN=AMELX PE=1 SV=2	1	hf1_eb_18273_84_20032023.ScanId;v=1;d1=14876.14876.2	controllerType=0 controllerNumber=1 scan=14876	38.4713
15938:2	1	P.LPPHPGHPGYINF.S			723.369	2	1445.73	1445.73	0	-1.7	19	Non	564.9	509.71	509.71	6.82	1104	>sp|P02817|AMELX_BOVIN Amelogenin, X isoform OS=Bos taurus OX=9913 GN=AMELX PE=1 SV=2	1	hf1_eb_18273_84_20032023.ScanId;v=1;d1=14676.14676.2	controllerType=0 controllerNumber=1 scan=14676	38.1152
15637:2	1	P.LPPHPGHPGYINF.S			723.369	2	1445.73	1445.73	0	-0.8	19	Non	575.88	517.66	517.66	7.04	1104	>sp|P02817|AMELX_BOVIN Amelogenin, X isoform OS=Bos taurus OX=9913 GN=AMELX PE=1 SV=2	1	hf1_eb_18273_84_20032023.ScanId;v=1;d1=14472.14472.2	controllerType=0 controllerNumber=1 scan=14472	37.7688
16776:2	1	P.LPPHPGHPGYINF.S			723.368	2	1445.73	1445.73	0	-2.2	19	Non	626.1	550.87	550.87	8.52	1104	>sp|P02817|AMELX_BOVIN Amelogenin, X isoform OS=Bos taurus OX=9913 GN=AMELX PE=1 SV=2	1	hf1_eb_18273_84_20032023.ScanId;v=1;d1=15283.15283.2	controllerType=0 controllerNumber=1 scan=15283	39.1736
21427:3	1	P.LPPHPGHPGYIN[+0.984]F.S		N[+1]	482.91	3	1446.71	1446.72	0	-1	19	Non	207.86	207.86	207.86	2.97	1104	>sp|P02817|AMELX_BOVIN Amelogenin, X isoform OS=Bos taurus OX=9913 GN=AMELX PE=1 SV=2	1	hf1_eb_18273_84_20032023.ScanId;v=1;d1=18724.18724.3	controllerType=0 controllerNumber=1 scan=18724	45.3972
19448:3	1	P.LPPHPGHPGYIN[+0.984]F.S		N[+1]	482.91	3	1446.71	1446.72	0	-1.1	19	Non	211.89	211.89	211.89	2.97	1104	>sp|P02817|AMELX_BOVIN Amelogenin, X isoform OS=Bos taurus OX=9913 GN=AMELX PE=1 SV=2	1	hf1_eb_18273_84_20032023.ScanId;v=1;d1=17277.17277.3	controllerType=0 controllerNumber=1 scan=17277	42.7619
14354:3	1	P.LPPHPGHPGYIN[+0.984]F.S		N[+1]	482.91	3	1446.71	1446.72	0	-1.2	19	Non	216.11	216.11	216.11	2.97	1104	>sp|P02817|AMELX_BOVIN Amelogenin, X isoform OS=Bos taurus OX=9913 GN=AMELX PE=1 SV=2	1	hf1_eb_18273_84_20032023.ScanId;v=1;d1=13548.13548.3	controllerType=0 controllerNumber=1 scan=13548	36.0749
20472:3	1	P.LPPHPGHPGYIN[+0.984]F.S		N[+1]	482.91	3	1446.72	1446.72	0	-0.1	19	Non	229.32	229.32	229.32	2.97	1104	>sp|P02817|AMELX_BOVIN Amelogenin, X isoform OS=Bos taurus OX=9913 GN=AMELX PE=1 SV=2	1	hf1_eb_18273_84_20032023.ScanId;v=1;d1=18045.18045.3	controllerType=0 controllerNumber=1 scan=18045	44.1831
17154:3	1	P.LPPHPGHPGYIN[+0.984]F.S		N[+1]	482.909	3	1446.71	1446.72	0	-3.5	19	Non	265.15	265.15	265.15	3.37	1104	>sp|P02817|AMELX_BOVIN Amelogenin, X isoform OS=Bos taurus OX=9913 GN=AMELX PE=1 SV=2	1	hf1_eb_18273_84_20032023.ScanId;v=1;d1=15562.15562.3	controllerType=0 controllerNumber=1 scan=15562	39.6641
18736:3	1	P.LPPHPGHPGYIN[+0.984]F.S		N[+1]	482.91	3	1446.72	1446.72	0	-0.8	19	Non	269.6	269.6	269.6	4.39	1104	>sp|P02817|AMELX_BOVIN Amelogenin, X isoform OS=Bos taurus OX=9913 GN=AMELX PE=1 SV=2	1	hf1_eb_18273_84_20032023.ScanId;v=1;d1=16756.16756.3	controllerType=0 controllerNumber=1 scan=16756	41.8182
17212:3	1	P.LPPHPGHPGYIN[+0.984]F.S		N[+1]	482.91	3	1446.72	1446.72	0	-0.8	19	Non	270.25	270.25	270.25	4.39	1104	>sp|P02817|AMELX_BOVIN Amelogenin, X isoform OS=Bos taurus OX=9913 GN=AMELX PE=1 SV=2	1	hf1_eb_18273_84_20032023.ScanId;v=1;d1=15603.15603.3	controllerType=0 controllerNumber=1 scan=15603	39.7335
21151:3	1	P.LPPHPGHPGYIN[+0.984]F.S		N[+1]	482.91	3	1446.72	1446.72	0	-0.1	19	Non	295.4	295.4	295.4	4.89	1104	>sp|P02817|AMELX_BOVIN Amelogenin, X isoform OS=Bos taurus OX=9913 GN=AMELX PE=1 SV=2	1	hf1_eb_18273_84_20032023.ScanId;v=1;d1=18529.18529.3	controllerType=0 controllerNumber=1 scan=18529	45.0497
18190:3	1	P.LPPHPGHPGYIN[+0.984]F.S		N[+1]	482.91	3	1446.71	1446.72	0	-1.1	19	Non	296.75	296.75	296.75	4.89	1104	>sp|P02817|AMELX_BOVIN Amelogenin, X isoform OS=Bos taurus OX=9913 GN=AMELX PE=1 SV=2	1	hf1_eb_18273_84_20032023.ScanId;v=1;d1=16365.16365.3	controllerType=0 controllerNumber=1 scan=16365	41.1213
18485:3	1	P.LPPHPGHPGYIN[+0.984]F.S		N[+1]	482.91	3	1446.71	1446.72	0	-1.4	19	Non	297.67	297.67	297.67	5	1104	>sp|P02817|AMELX_BOVIN Amelogenin, X isoform OS=Bos taurus OX=9913 GN=AMELX PE=1 SV=2	1	hf1_eb_18273_84_20032023.ScanId;v=1;d1=16566.16566.3	controllerType=0 controllerNumber=1 scan=16566	41.4776
17696:3	1	P.LPPHPGHPGYIN[+0.984]F.S		N[+1]	482.91	3	1446.72	1446.72	0	-0.2	19	Non	316.43	316.43	316.43	5	1104	>sp|P02817|AMELX_BOVIN Amelogenin, X isoform OS=Bos taurus OX=9913 GN=AMELX PE=1 SV=2	1	hf1_eb_18273_84_20032023.ScanId;v=1;d1=15979.15979.3	controllerType=0 controllerNumber=1 scan=15979	40.4189
17471:3	1	P.LPPHPGHPGYIN[+0.984]F.S		N[+1]	482.91	3	1446.72	1446.72	0	-0.4	19	Non	323.1	323.1	323.1	5.11	1104	>sp|P02817|AMELX_BOVIN Amelogenin, X isoform OS=Bos taurus OX=9913 GN=AMELX PE=1 SV=2	1	hf1_eb_18273_84_20032023.ScanId;v=1;d1=15796.15796.3	controllerType=0 controllerNumber=1 scan=15796	40.0803
17943:3	1	P.LPPHPGHPGYIN[+0.984]F.S		N[+1]	482.91	3	1446.71	1446.72	0	-1.2	19	Non	326	326	326	5.11	1104	>sp|P02817|AMELX_BOVIN Amelogenin, X isoform OS=Bos taurus OX=9913 GN=AMELX PE=1 SV=2	1	hf1_eb_18273_84_20032023.ScanId;v=1;d1=16171.16171.3	controllerType=0 controllerNumber=1 scan=16171	40.7666
16630:3	1	P.LPPHPGHPGYIN[+0.984]F.S		N[+1]	482.91	3	1446.72	1446.72	0	-0.7	19	Non	372.24	372.24	372.24	6	1104	>sp|P02817|AMELX_BOVIN Amelogenin, X isoform OS=Bos taurus OX=9913 GN=AMELX PE=1 SV=2	1	hf1_eb_18273_84_20032023.ScanId;v=1;d1=15175.15175.3	controllerType=0 controllerNumber=1 scan=15175	38.9873
16377:3	1	P.LPPHPGHPGYIN[+0.984]F.S		N[+1]	482.91	3	1446.71	1446.72	0	-1.4	19	Non	394.05	394.05	394.05	6	1104	>sp|P02817|AMELX_BOVIN Amelogenin, X isoform OS=Bos taurus OX=9913 GN=AMELX PE=1 SV=2	1	hf1_eb_18273_84_20032023.ScanId;v=1;d1=14992.14992.3	controllerType=0 controllerNumber=1 scan=14992	38.6713
21701:2	1	P.LPPHP[+31.990]GHPGYINF.S		P[+32]	739.365	2	1477.72	1477.72	0	0.2	19	Non	406.49	406.49	9.3	6.27	1104	>sp|P02817|AMELX_BOVIN Amelogenin, X isoform OS=Bos taurus OX=9913 GN=AMELX PE=1 SV=2	1	hf1_eb_18273_84_20032023.ScanId;v=1;d1=18915.18915.2	controllerType=0 controllerNumber=1 scan=18915	45.7368
16206:2	1	P.LPPHPGHPGYIN[+0.984]F.S		N[+1]	723.859	2	1446.71	1446.72	0	-4	19	Non	597.35	522.09	522.09	6.22	1104	>sp|P02817|AMELX_BOVIN Amelogenin, X isoform OS=Bos taurus OX=9913 GN=AMELX PE=1 SV=2	1	hf1_eb_18273_84_20032023.ScanId;v=1;d1=14876.14876.2	controllerType=0 controllerNumber=1 scan=14876	38.4713
16504:2	1	P.LPPHPGHPGYIN[+0.984]F.S		N[+1]	723.859	2	1446.71	1446.72	0	-3.5	19	Non	608.6	566.31	566.31	7.7	1104	>sp|P02817|AMELX_BOVIN Amelogenin, X isoform OS=Bos taurus OX=9913 GN=AMELX PE=1 SV=2	1	hf1_eb_18273_84_20032023.ScanId;v=1;d1=15082.15082.2	controllerType=0 controllerNumber=1 scan=15082	38.8236
18072:2	1	P.LPPHPGHPGYIN[+0.984]F.S		N[+1]	723.861	2	1446.71	1446.72	0	-1.8	19	Non	612.02	533.47	533.47	8.52	1104	>sp|P02817|AMELX_BOVIN Amelogenin, X isoform OS=Bos taurus OX=9913 GN=AMELX PE=1 SV=2	1	hf1_eb_18273_84_20032023.ScanId;v=1;d1=16272.16272.2	controllerType=0 controllerNumber=1 scan=16272	40.9597
17363:2	1	P.LPPHPGHPGYIN[+0.984]F.S		N[+1]	723.861	2	1446.71	1446.72	0	-1.8	19	Non	651.7	585.86	585.86	9.52	1104	>sp|P02817|AMELX_BOVIN Amelogenin, X isoform OS=Bos taurus OX=9913 GN=AMELX PE=1 SV=2	1	hf1_eb_18273_84_20032023.ScanId;v=1;d1=15716.15716.2	controllerType=0 controllerNumber=1 scan=15716	39.9386
17603:2	1	P.LPPHPGHPGYIN[+0.984]F.S		N[+1]	723.861	2	1446.71	1446.72	0	-1.8	19	Non	652.32	612.3	612.3	9.52	1104	>sp|P02817|AMELX_BOVIN Amelogenin, X isoform OS=Bos taurus OX=9913 GN=AMELX PE=1 SV=2	1	hf1_eb_18273_84_20032023.ScanId;v=1;d1=15901.15901.2	controllerType=0 controllerNumber=1 scan=15901	40.2778
17835:2	1	P.LPPHPGHPGYIN[+0.984]F.S		N[+1]	723.861	2	1446.71	1446.72	0	-1.6	19	Non	662.31	594.73	594.73	9.52	1104	>sp|P02817|AMELX_BOVIN Amelogenin, X isoform OS=Bos taurus OX=9913 GN=AMELX PE=1 SV=2	1	hf1_eb_18273_84_20032023.ScanId;v=1;d1=16088.16088.2	controllerType=0 controllerNumber=1 scan=16088	40.6174
23114:2	1	P.LPP[+31.990]HPGHPGYIN[+0.984]F.S		N[+1], P[+32]	739.855	2	1478.7	1478.71	0	-1.9	19	Non	159.96	159.96	11.53	1.53	1104	>sp|P02817|AMELX_BOVIN Amelogenin, X isoform OS=Bos taurus OX=9913 GN=AMELX PE=1 SV=2	1	hf1_eb_18273_84_20032023.ScanId;v=1;d1=19914.19914.2	controllerType=0 controllerNumber=1 scan=19914	47.4979
15564:2	1	P.LPPHPGHP[+15.995]GYIN[+0.984]F.S		N[+1], P[+16]	731.858	2	1462.71	1462.71	0	-1.4	19	Non	230	230	0	3.27	1104	>sp|P02817|AMELX_BOVIN Amelogenin, X isoform OS=Bos taurus OX=9913 GN=AMELX PE=1 SV=2	1	hf1_eb_18273_84_20032023.ScanId;v=1;d1=14417.14417.4	controllerType=0 controllerNumber=1 scan=14417	37.6704
16072:3	1	P.LPPHPGHP[+15.995]GYIN[+0.984]F.S		N[+1], P[+16]	488.241	3	1462.71	1462.71	0	-2.6	19	Non	242.26	242.26	10.11	3.85	1104	>sp|P02817|AMELX_BOVIN Amelogenin, X isoform OS=Bos taurus OX=9913 GN=AMELX PE=1 SV=2	1	hf1_eb_18273_84_20032023.ScanId;v=1;d1=14775.14775.3	controllerType=0 controllerNumber=1 scan=14775	38.2936
22534:2	1	P.LPP[+15.995]HPGHPGYIN[+0.984]F.S		N[+1], P[+16]	731.86	2	1462.71	1462.71	0	1	19	Non	263.3	257.36	0	4.05	1104	>sp|P02817|AMELX_BOVIN Amelogenin, X isoform OS=Bos taurus OX=9913 GN=AMELX PE=1 SV=2	1	hf1_eb_18273_84_20032023.ScanId;v=1;d1=19510.19510.2	controllerType=0 controllerNumber=1 scan=19510	46.7783
15758:3	1	P.LPPHPGHP[+15.995]GYIN[+0.984]F.S		N[+1], P[+16]	488.241	3	1462.71	1462.71	0	-2.2	19	Non	264.61	264.61	6.67	3.85	1104	>sp|P02817|AMELX_BOVIN Amelogenin, X isoform OS=Bos taurus OX=9913 GN=AMELX PE=1 SV=2	1	hf1_eb_18273_84_20032023.ScanId;v=1;d1=14556.14556.3	controllerType=0 controllerNumber=1 scan=14556	37.9135
15484:3	1	P.LPPHPGHP[+15.995]GYIN[+0.984]F.S		N[+1], P[+16]	488.241	3	1462.71	1462.71	0	-2.2	19	Non	273.11	273.11	10.72	3.85	1104	>sp|P02817|AMELX_BOVIN Amelogenin, X isoform OS=Bos taurus OX=9913 GN=AMELX PE=1 SV=2	1	hf1_eb_18273_84_20032023.ScanId;v=1;d1=14360.14360.3	controllerType=0 controllerNumber=1 scan=14360	37.5656
21301:2	1	P.LPP[+31.990]HPGHPGYIN[+0.984]F.S		N[+1], P[+32]	739.856	2	1478.71	1478.71	0	-0.5	19	Non	281.13	257.48	7.43	4.74	1104	>sp|P02817|AMELX_BOVIN Amelogenin, X isoform OS=Bos taurus OX=9913 GN=AMELX PE=1 SV=2	1	hf1_eb_18273_84_20032023.ScanId;v=1;d1=18635.18635.3	controllerType=0 controllerNumber=1 scan=18635	45.2386
21021:2	1	P.LPP[+31.990]HPGHPGYIN[+0.984]F.S		N[+1], P[+32]	739.856	2	1478.7	1478.71	0	-1.4	19	Non	283.62	283.62	22.37	4.88	1104	>sp|P02817|AMELX_BOVIN Amelogenin, X isoform OS=Bos taurus OX=9913 GN=AMELX PE=1 SV=2	1	hf1_eb_18273_84_20032023.ScanId;v=1;d1=18433.18433.3	controllerType=0 controllerNumber=1 scan=18433	44.8713
22660:2	1	P.LPPHP[+31.990]GHPGYIN[+0.984]F.S		N[+1], P[+32]	739.857	2	1478.71	1478.71	0	0.5	19	Non	288.1	273.52	1.22	4.4	1104	>sp|P02817|AMELX_BOVIN Amelogenin, X isoform OS=Bos taurus OX=9913 GN=AMELX PE=1 SV=2	1	hf1_eb_18273_84_20032023.ScanId;v=1;d1=19596.19596.2	controllerType=0 controllerNumber=1 scan=19596	46.9288
17187:3	1	P.LP[+31.990]PHPGHPGYIN[+0.984]F.S		N[+1], P[+32]	493.573	3	1478.7	1478.71	0	-1.3	19	Non	300.44	241.4	11.25	4.42	1104	>sp|P02817|AMELX_BOVIN Amelogenin, X isoform OS=Bos taurus OX=9913 GN=AMELX PE=1 SV=2	1	hf1_eb_18273_84_20032023.ScanId;v=1;d1=15585.15585.3	controllerType=0 controllerNumber=1 scan=15585	39.7032
22822:2	1	P.LPP[+31.990]HPGHPGYIN[+0.984]F.S		N[+1], P[+32]	739.856	2	1478.71	1478.71	0	-0.8	19	Non	304.6	304.6	2.72	4.88	1104	>sp|P02817|AMELX_BOVIN Amelogenin, X isoform OS=Bos taurus OX=9913 GN=AMELX PE=1 SV=2	1	hf1_eb_18273_84_20032023.ScanId;v=1;d1=19714.19714.2	controllerType=0 controllerNumber=1 scan=19714	47.1377
16906:2	1	P.LPPHP[+15.995]GHPGYIN[+0.984]F.S		N[+1], P[+16]	731.857	2	1462.71	1462.71	0	-2.6	19	Non	309.89	265.49	0	3.92	1104	>sp|P02817|AMELX_BOVIN Amelogenin, X isoform OS=Bos taurus OX=9913 GN=AMELX PE=1 SV=2	1	hf1_eb_18273_84_20032023.ScanId;v=1;d1=15384.15384.2	controllerType=0 controllerNumber=1 scan=15384	39.3586
15411:2	1	P.LPPHPGHP[+15.995]GYIN[+0.984]F.S		N[+1], P[+16]	731.859	2	1462.71	1462.71	0	-0.7	19	Non	332.64	332.64	14.19	5.32	1104	>sp|P02817|AMELX_BOVIN Amelogenin, X isoform OS=Bos taurus OX=9913 GN=AMELX PE=1 SV=2	1	hf1_eb_18273_84_20032023.ScanId;v=1;d1=14302.14302.2	controllerType=0 controllerNumber=1 scan=14302	37.4531
22856:2	1	P.LPPH[+15.995]PGHPGYIN[+0.984]F.S		H[+16], N[+1]	731.859	2	1462.71	1462.71	0	-0.2	19	Non	383.91	383.91	9.39	6.15	1104	>sp|P02817|AMELX_BOVIN Amelogenin, X isoform OS=Bos taurus OX=9913 GN=AMELX PE=1 SV=2	1	hf1_eb_18273_84_20032023.ScanId;v=1;d1=19739.19739.2	controllerType=0 controllerNumber=1 scan=19739	47.1861
21702:2	1	P.LPPHP[+31.990]GHPGYIN[+0.984]F.S		N[+1], P[+32]	739.855	2	1478.7	1478.71	0	-1.9	19	Non	387.96	384.07	0.89	5.94	1104	>sp|P02817|AMELX_BOVIN Amelogenin, X isoform OS=Bos taurus OX=9913 GN=AMELX PE=1 SV=2	1	hf1_eb_18273_84_20032023.ScanId;v=1;d1=18915.18915.2	controllerType=0 controllerNumber=1 scan=18915	45.7368
17223:2	1	P.LP[+31.990]PHPGHPGYIN[+0.984]F.S		N[+1], P[+32]	739.856	2	1478.71	1478.71	0	-0.4	19	Non	439.43	341.97	58.55	5.49	1104	>sp|P02817|AMELX_BOVIN Amelogenin, X isoform OS=Bos taurus OX=9913 GN=AMELX PE=1 SV=2	1	hf1_eb_18273_84_20032023.ScanId;v=1;d1=15611.15611.2	controllerType=0 controllerNumber=1 scan=15611	39.7481
16646:2	1	P.LPPHPGHPGY[+15.995]IN[+0.984]F.S		N[+1], Y[+16]	731.859	2	1462.71	1462.71	0	-0.6	19	Non	506.58	423.78	0	6.32	1104	>sp|P02817|AMELX_BOVIN Amelogenin, X isoform OS=Bos taurus OX=9913 GN=AMELX PE=1 SV=2	1	hf1_eb_18273_84_20032023.ScanId;v=1;d1=15189.15189.2	controllerType=0 controllerNumber=1 scan=15189	39.0165
21989:2	1	P.LPPHP[+31.990]GHPGYIN[+0.984]F.S		N[+1], P[+32]	739.855	2	1478.7	1478.71	0	-1.9	19	Non	537.42	537.42	69.84	6.38	1104	>sp|P02817|AMELX_BOVIN Amelogenin, X isoform OS=Bos taurus OX=9913 GN=AMELX PE=1 SV=2	1	hf1_eb_18273_84_20032023.ScanId;v=1;d1=19119.19119.2	controllerType=0 controllerNumber=1 scan=19119	46.091
16378:2	1	P.LPPHPGHP[+15.995]GYIN[+0.984]F.S		N[+1], P[+16]	731.858	2	1462.71	1462.71	0	-2	19	Non	608.66	607.38	16.28	8.52	1104	>sp|P02817|AMELX_BOVIN Amelogenin, X isoform OS=Bos taurus OX=9913 GN=AMELX PE=1 SV=2	1	hf1_eb_18273_84_20032023.ScanId;v=1;d1=14993.14993.2	controllerType=0 controllerNumber=1 scan=14993	38.6722
13908:3	1	P.LPPHPGHPGYINFS.Y			511.593	3	1532.77	1532.76	0	0.4	19	Non	236.59	236.59	236.59	2.68	1104	>sp|P02817|AMELX_BOVIN Amelogenin, X isoform OS=Bos taurus OX=9913 GN=AMELX PE=1 SV=2	1	hf1_eb_18273_84_20032023.ScanId;v=1;d1=13221.13221.3	controllerType=0 controllerNumber=1 scan=13221	35.472
14153:3	1	P.LPPHPGHPGYINFS.Y			511.593	3	1532.77	1532.76	0	0.6	19	Non	261.25	261.25	261.25	3.73	1104	>sp|P02817|AMELX_BOVIN Amelogenin, X isoform OS=Bos taurus OX=9913 GN=AMELX PE=1 SV=2	1	hf1_eb_18273_84_20032023.ScanId;v=1;d1=13405.13405.3	controllerType=0 controllerNumber=1 scan=13405	35.811
15989:3	1	P.LPPHPGHPGYIN[+0.984]FS.Y		N[+1]	511.92	3	1533.75	1533.75	0	-1.8	19	Non	179.2	179.2	179.2	2.14	1104	>sp|P02817|AMELX_BOVIN Amelogenin, X isoform OS=Bos taurus OX=9913 GN=AMELX PE=1 SV=2	1	hf1_eb_18273_84_20032023.ScanId;v=1;d1=14715.14715.3	controllerType=0 controllerNumber=1 scan=14715	38.1828
18274:3	1	P.LPPHPGHPGYINFS[+79.966].Y		S[+80]	538.248	3	1612.73	1612.73	0	-0.1	19	Non	194.53	194.53	180.85	2.23	1104	>sp|P02817|AMELX_BOVIN Amelogenin, X isoform OS=Bos taurus OX=9913 GN=AMELX PE=1 SV=2	1	hf1_eb_18273_84_20032023.ScanId;v=1;d1=16421.16421.3	controllerType=0 controllerNumber=1 scan=16421	41.2232
17548:3	1	P.LPPHPGHPGYINFS[+79.966].Y		S[+80]	538.248	3	1612.73	1612.73	0	-0.8	19	Non	202.91	202.91	198.93	2.47	1104	>sp|P02817|AMELX_BOVIN Amelogenin, X isoform OS=Bos taurus OX=9913 GN=AMELX PE=1 SV=2	1	hf1_eb_18273_84_20032023.ScanId;v=1;d1=15855.15855.3	controllerType=0 controllerNumber=1 scan=15855	40.1873
16250:3	1	P.LPPHPGHPGYIN[+0.984]FS.Y		N[+1]	511.921	3	1533.75	1533.75	0	-1.1	19	Non	224.95	224.95	224.95	2.97	1104	>sp|P02817|AMELX_BOVIN Amelogenin, X isoform OS=Bos taurus OX=9913 GN=AMELX PE=1 SV=2	1	hf1_eb_18273_84_20032023.ScanId;v=1;d1=14908.14908.3	controllerType=0 controllerNumber=1 scan=14908	38.5274
17771:3	1	P.LPPHPGHPGYINFS[+79.966].Y		S[+80]	538.247	3	1612.73	1612.73	0	-1.8	19	Non	232.87	232.87	206.93	2.78	1104	>sp|P02817|AMELX_BOVIN Amelogenin, X isoform OS=Bos taurus OX=9913 GN=AMELX PE=1 SV=2	1	hf1_eb_18273_84_20032023.ScanId;v=1;d1=16040.16040.3	controllerType=0 controllerNumber=1 scan=16040	40.5299
18015:3	1	P.LPPHPGHPGYINFS[+79.966].Y		S[+80]	538.248	3	1612.73	1612.73	0	-1.3	19	Non	251.46	251.46	243.85	4.39	1104	>sp|P02817|AMELX_BOVIN Amelogenin, X isoform OS=Bos taurus OX=9913 GN=AMELX PE=1 SV=2	1	hf1_eb_18273_84_20032023.ScanId;v=1;d1=16229.16229.3	controllerType=0 controllerNumber=1 scan=16229	40.8754
16537:3	1	P.LPPHPGHPGYIN[+0.984]FS.Y		N[+1]	511.92	3	1533.75	1533.75	0	-1.5	19	Non	287.98	287.98	287.98	4.34	1104	>sp|P02817|AMELX_BOVIN Amelogenin, X isoform OS=Bos taurus OX=9913 GN=AMELX PE=1 SV=2	1	hf1_eb_18273_84_20032023.ScanId;v=1;d1=15106.15106.3	controllerType=0 controllerNumber=1 scan=15106	38.8686
16277:2	1	P.LPPHPGHPGYIN[+0.984]FS.Y		N[+1]	767.376	2	1533.75	1533.75	0	-1.8	19	Non	313.47	303.37	303.37	4.66	1104	>sp|P02817|AMELX_BOVIN Amelogenin, X isoform OS=Bos taurus OX=9913 GN=AMELX PE=1 SV=2	1	hf1_eb_18273_84_20032023.ScanId;v=1;d1=14926.14926.3	controllerType=0 controllerNumber=1 scan=14926	38.5551
16601:2	1	P.LPPHPGHPGYIN[+0.984]FS.Y		N[+1]	767.377	2	1533.75	1533.75	0	-1.6	19	Non	378.63	330.41	330.41	5.16	1104	>sp|P02817|AMELX_BOVIN Amelogenin, X isoform OS=Bos taurus OX=9913 GN=AMELX PE=1 SV=2	1	hf1_eb_18273_84_20032023.ScanId;v=1;d1=15154.15154.2	controllerType=0 controllerNumber=1 scan=15154	38.9509
16007:2	1	P.LPPHPGHPGYIN[+0.984]FS.Y		N[+1]	767.377	2	1533.75	1533.75	0	-0.9	19	Non	460.8	460.8	460.8	6.36	1104	>sp|P02817|AMELX_BOVIN Amelogenin, X isoform OS=Bos taurus OX=9913 GN=AMELX PE=1 SV=2	1	hf1_eb_18273_84_20032023.ScanId;v=1;d1=14730.14730.2	controllerType=0 controllerNumber=1 scan=14730	38.2133
17989:2	1	P.LPPHPGHPGYINFS[+79.966].Y		S[+80]	806.868	2	1612.73	1612.73	0	-1.3	19	Non	510.29	445.48	345.81	7.02	1104	>sp|P02817|AMELX_BOVIN Amelogenin, X isoform OS=Bos taurus OX=9913 GN=AMELX PE=1 SV=2	1	hf1_eb_18273_84_20032023.ScanId;v=1;d1=16211.16211.2	controllerType=0 controllerNumber=1 scan=16211	40.8441
17960:2	1	P.LPPHPGHPGYINFS[+79.966].Y		S[+80]	806.867	2	1612.73	1612.73	0	-2	19	Non	570.13	454.83	367.6	7.05	1104	>sp|P02817|AMELX_BOVIN Amelogenin, X isoform OS=Bos taurus OX=9913 GN=AMELX PE=1 SV=2	1	hf1_eb_18273_84_20032023.ScanId;v=1;d1=16185.16185.3	controllerType=0 controllerNumber=1 scan=16185	40.7915
17748:2	1	P.LPPHPGHPGYINFS[+79.966].Y		S[+80]	806.867	2	1612.73	1612.73	0	-1.9	19	Non	628.67	571.77	389.41	8.52	1104	>sp|P02817|AMELX_BOVIN Amelogenin, X isoform OS=Bos taurus OX=9913 GN=AMELX PE=1 SV=2	1	hf1_eb_18273_84_20032023.ScanId;v=1;d1=16022.16022.2	controllerType=0 controllerNumber=1 scan=16022	40.4958
19556:3	1	P.LPPHPGHPGYIN[+0.984]FS[+79.966].Y		N[+1], S[+80]	538.576	3	1613.71	1613.71	0	-0.8	19	Non	217.89	214.46	214.46	3.28	1104	>sp|P02817|AMELX_BOVIN Amelogenin, X isoform OS=Bos taurus OX=9913 GN=AMELX PE=1 SV=2	1	hf1_eb_18273_84_20032023.ScanId;v=1;d1=17355.17355.3	controllerType=0 controllerNumber=1 scan=17355	42.9015
19965:2	1	P.LPPHPGHPGYIN[+0.984]FS[+79.966].Y		N[+1], S[+80]	807.362	2	1613.72	1613.71	0	0.6	19	Non	236.75	236.75	167.21	3.26	1104	>sp|P02817|AMELX_BOVIN Amelogenin, X isoform OS=Bos taurus OX=9913 GN=AMELX PE=1 SV=2	1	hf1_eb_18273_84_20032023.ScanId;v=1;d1=17676.17676.2	controllerType=0 controllerNumber=1 scan=17676	43.5101
18775:3	1	P.LPPHPGHPGYIN[+0.984]FS[+79.966].Y		N[+1], S[+80]	538.576	3	1613.71	1613.71	0	-0.5	19	Non	243.52	243.52	243.52	4.06	1104	>sp|P02817|AMELX_BOVIN Amelogenin, X isoform OS=Bos taurus OX=9913 GN=AMELX PE=1 SV=2	1	hf1_eb_18273_84_20032023.ScanId;v=1;d1=16787.16787.3	controllerType=0 controllerNumber=1 scan=16787	41.8717
19296:3	1	P.LPPHPGHPGYIN[+0.984]FS[+79.966].Y		N[+1], S[+80]	538.576	3	1613.71	1613.71	0	-1.6	19	Non	274.58	251.04	251.04	4.29	1104	>sp|P02817|AMELX_BOVIN Amelogenin, X isoform OS=Bos taurus OX=9913 GN=AMELX PE=1 SV=2	1	hf1_eb_18273_84_20032023.ScanId;v=1;d1=17168.17168.3	controllerType=0 controllerNumber=1 scan=17168	42.5644
19034:3	1	P.LPPHPGHPGYIN[+0.984]FS[+79.966].Y		N[+1], S[+80]	538.576	3	1613.71	1613.71	0	-0.5	19	Non	278.37	243.34	243.34	4.5	1104	>sp|P02817|AMELX_BOVIN Amelogenin, X isoform OS=Bos taurus OX=9913 GN=AMELX PE=1 SV=2	1	hf1_eb_18273_84_20032023.ScanId;v=1;d1=16978.16978.3	controllerType=0 controllerNumber=1 scan=16978	42.2177
18539:2	1	P.LPPHPGHPGYIN[+0.984]FS[+79.966].Y		N[+1], S[+80]	807.362	2	1613.72	1613.71	0	0.6	19	Non	549.56	549.56	307.44	6.73	1104	>sp|P02817|AMELX_BOVIN Amelogenin, X isoform OS=Bos taurus OX=9913 GN=AMELX PE=1 SV=2	1	hf1_eb_18273_84_20032023.ScanId;v=1;d1=16605.16605.2	controllerType=0 controllerNumber=1 scan=16605	41.5494
20046:2	1	P.LPPHPGHPGYIN[+0.984]FS[+79.966].Y		N[+1], S[+80]	807.359	2	1613.71	1613.71	0	-2.8	19	Non	571.96	529.82	358.14	7.52	1104	>sp|P02817|AMELX_BOVIN Amelogenin, X isoform OS=Bos taurus OX=9913 GN=AMELX PE=1 SV=2	1	hf1_eb_18273_84_20032023.ScanId;v=1;d1=17733.17733.2	controllerType=0 controllerNumber=1 scan=17733	43.6157
18248:2	1	P.LPPHPGHPGYIN[+0.984]FS[+79.966].Y		N[+1], S[+80]	807.359	2	1613.71	1613.71	0	-3.1	19	Non	630.41	581.31	402.45	8.52	1104	>sp|P02817|AMELX_BOVIN Amelogenin, X isoform OS=Bos taurus OX=9913 GN=AMELX PE=1 SV=2	1	hf1_eb_18273_84_20032023.ScanId;v=1;d1=16406.16406.2	controllerType=0 controllerNumber=1 scan=16406	41.1958
19808:2	1	P.LPPHPGHPGYIN[+0.984]FS[+79.966].Y		N[+1], S[+80]	807.359	2	1613.71	1613.71	0	-2.1	19	Non	681.03	616.69	442.31	9.52	1104	>sp|P02817|AMELX_BOVIN Amelogenin, X isoform OS=Bos taurus OX=9913 GN=AMELX PE=1 SV=2	1	hf1_eb_18273_84_20032023.ScanId;v=1;d1=17548.17548.2	controllerType=0 controllerNumber=1 scan=17548	43.2639
19573:2	1	P.LPPHPGHPGYIN[+0.984]FS[+79.966].Y		N[+1], S[+80]	807.36	2	1613.71	1613.71	0	-1.5	19	Non	681.49	618.94	447.65	9.52	1104	>sp|P02817|AMELX_BOVIN Amelogenin, X isoform OS=Bos taurus OX=9913 GN=AMELX PE=1 SV=2	1	hf1_eb_18273_84_20032023.ScanId;v=1;d1=17366.17366.2	controllerType=0 controllerNumber=1 scan=17366	42.9208
19049:2	1	P.LPPHPGHPGYIN[+0.984]FS[+79.966].Y		N[+1], S[+80]	807.36	2	1613.71	1613.71	0	-1.2	19	Non	702.97	695.81	466.33	10.74	1104	>sp|P02817|AMELX_BOVIN Amelogenin, X isoform OS=Bos taurus OX=9913 GN=AMELX PE=1 SV=2	1	hf1_eb_18273_84_20032023.ScanId;v=1;d1=16988.16988.2	controllerType=0 controllerNumber=1 scan=16988	42.2354
19301:2	1	P.LPPHPGHPGYIN[+0.984]FS[+79.966].Y		N[+1], S[+80]	807.36	2	1613.71	1613.71	0	-1.3	19	Non	759.47	706.72	499.29	11.74	1104	>sp|P02817|AMELX_BOVIN Amelogenin, X isoform OS=Bos taurus OX=9913 GN=AMELX PE=1 SV=2	1	hf1_eb_18273_84_20032023.ScanId;v=1;d1=17173.17173.2	controllerType=0 controllerNumber=1 scan=17173	42.5747
18787:2	1	P.LPPHPGHPGYIN[+0.984]FS[+79.966].Y		N[+1], S[+80]	807.36	2	1613.71	1613.71	0	-1.2	19	Non	765.17	679.84	490.98	11.74	1104	>sp|P02817|AMELX_BOVIN Amelogenin, X isoform OS=Bos taurus OX=9913 GN=AMELX PE=1 SV=2	1	hf1_eb_18273_84_20032023.ScanId;v=1;d1=16797.16797.2	controllerType=0 controllerNumber=1 scan=16797	41.8923
18030:2	1	P.LPPHPGHPGY[+15.995]IN[+0.984]FS[+79.966].Y		N[+1], S[+80], Y[+16]	815.356	2	1629.7	1629.71	0	-3.1	19	Non	244.05	244.05	4.68	4.17	1104	>sp|P02817|AMELX_BOVIN Amelogenin, X isoform OS=Bos taurus OX=9913 GN=AMELX PE=1 SV=2	1	hf1_eb_18273_84_20032023.ScanId;v=1;d1=16239.16239.2	controllerType=0 controllerNumber=1 scan=16239	40.8929
17975:2	1	P.LPPHPGHPGY[+15.995]IN[+0.984]FS[+79.966].Y		N[+1], S[+80], Y[+16]	815.354	2	1629.7	1629.71	0	-5	19	Non	372.63	362.79	17.32	5.22	1104	>sp|P02817|AMELX_BOVIN Amelogenin, X isoform OS=Bos taurus OX=9913 GN=AMELX PE=1 SV=2	1	hf1_eb_18273_84_20032023.ScanId;v=1;d1=16199.16199.2	controllerType=0 controllerNumber=1 scan=16199	40.8207
17779:2	1	P.LPPHPGHPGY[+15.995]IN[+0.984]FS[+79.966].Y		N[+1], S[+80], Y[+16]	815.357	2	1629.71	1629.71	0	-1.8	19	Non	379.04	365.49	0	5.94	1104	>sp|P02817|AMELX_BOVIN Amelogenin, X isoform OS=Bos taurus OX=9913 GN=AMELX PE=1 SV=2	1	hf1_eb_18273_84_20032023.ScanId;v=1;d1=16046.16046.2	controllerType=0 controllerNumber=1 scan=16046	40.5416
20106:3	1	P.LPPHPGHPGYIN[+0.984]FSY.E		N[+1]	566.275	3	1696.81	1696.81	0	-1.1	19	Non	151.37	151.37	151.37	1.44	1104	>sp|P02817|AMELX_BOVIN Amelogenin, X isoform OS=Bos taurus OX=9913 GN=AMELX PE=1 SV=2	1	hf1_eb_18273_84_20032023.ScanId;v=1;d1=17782.17782.3	controllerType=0 controllerNumber=1 scan=17782	43.7136
19871:3	1	P.LPPHPGHPGYIN[+0.984]FSY.E		N[+1]	566.274	3	1696.81	1696.81	0	-2.5	19	Non	220.23	220.23	220.23	2.33	1104	>sp|P02817|AMELX_BOVIN Amelogenin, X isoform OS=Bos taurus OX=9913 GN=AMELX PE=1 SV=2	1	hf1_eb_18273_84_20032023.ScanId;v=1;d1=17601.17601.3	controllerType=0 controllerNumber=1 scan=17601	43.3696
21747:2	1	P.LPPHPGHPGYINFS[+79.966]Y.E		S[+80]	888.401	2	1775.79	1775.79	0	0.2	19	Non	307.41	307.41	242.44	5.21	1104	>sp|P02817|AMELX_BOVIN Amelogenin, X isoform OS=Bos taurus OX=9913 GN=AMELX PE=1 SV=2	1	hf1_eb_18273_84_20032023.ScanId;v=1;d1=18947.18947.2	controllerType=0 controllerNumber=1 scan=18947	45.7895
20000:2	1	P.LPPHPGHPGYIN[+0.984]FSY.E		N[+1]	848.909	2	1696.81	1696.81	0	-0.1	19	Non	328.64	328.64	328.64	4.99	1104	>sp|P02817|AMELX_BOVIN Amelogenin, X isoform OS=Bos taurus OX=9913 GN=AMELX PE=1 SV=2	1	hf1_eb_18273_84_20032023.ScanId;v=1;d1=17700.17700.3	controllerType=0 controllerNumber=1 scan=17700	43.5533
23241:3	1	P.LPPHPGHPGYIN[+0.984]FS[+79.966]Y.E		N[+1], S[+80]	592.93	3	1776.78	1776.78	0	-1.4	19	Non	142	142	142	1.44	1104	>sp|P02817|AMELX_BOVIN Amelogenin, X isoform OS=Bos taurus OX=9913 GN=AMELX PE=1 SV=2	1	hf1_eb_18273_84_20032023.ScanId;v=1;d1=20001.20001.3	controllerType=0 controllerNumber=1 scan=20001	47.6536
22670:2	1	P.LPPHPGHPGYIN[+0.984]FS[+79.966]Y.E		N[+1], S[+80]	888.895	2	1776.78	1776.78	0	2.1	19	Non	231.08	231.08	231.08	3.42	1104	>sp|P02817|AMELX_BOVIN Amelogenin, X isoform OS=Bos taurus OX=9913 GN=AMELX PE=1 SV=2	1	hf1_eb_18273_84_20032023.ScanId;v=1;d1=19604.19604.2	controllerType=0 controllerNumber=1 scan=19604	46.9436
23049:3	1	P.LPPHPGHPGYIN[+0.984]FS[+79.966]Y.E		N[+1], S[+80]	592.93	3	1776.78	1776.78	0	-1.5	19	Non	244.51	215.64	215.64	4.14	1104	>sp|P02817|AMELX_BOVIN Amelogenin, X isoform OS=Bos taurus OX=9913 GN=AMELX PE=1 SV=2	1	hf1_eb_18273_84_20032023.ScanId;v=1;d1=19870.19870.3	controllerType=0 controllerNumber=1 scan=19870	47.4216
19578:2	1	P.LPPHPGHPGYIN[+0.984]FS[+79.966]Y.E		N[+1], S[+80]	888.895	2	1776.78	1776.78	0	2.7	19	Non	340.64	340.64	148.72	4.21	1104	>sp|P02817|AMELX_BOVIN Amelogenin, X isoform OS=Bos taurus OX=9913 GN=AMELX PE=1 SV=2	1	hf1_eb_18273_84_20032023.ScanId;v=1;d1=17370.17370.2	controllerType=0 controllerNumber=1 scan=17370	42.9295
23224:2	1	P.LPPHPGHPGYIN[+0.984]FS[+79.966]Y.E		N[+1], S[+80]	888.893	2	1776.78	1776.78	0	-0.2	19	Non	531.08	531.08	376.47	7.07	1104	>sp|P02817|AMELX_BOVIN Amelogenin, X isoform OS=Bos taurus OX=9913 GN=AMELX PE=1 SV=2	1	hf1_eb_18273_84_20032023.ScanId;v=1;d1=19989.19989.2	controllerType=0 controllerNumber=1 scan=19989	47.6345
22930:2	1	P.LPPHPGHPGYIN[+0.984]FS[+79.966]Y.E		N[+1], S[+80]	888.892	2	1776.78	1776.78	0	-1	19	Non	571.66	571.66	392.58	7.74	1104	>sp|P02817|AMELX_BOVIN Amelogenin, X isoform OS=Bos taurus OX=9913 GN=AMELX PE=1 SV=2	1	hf1_eb_18273_84_20032023.ScanId;v=1;d1=19790.19790.2	controllerType=0 controllerNumber=1 scan=19790	47.2838
18942:3	1	P.LPPHPGHPGYIN[+0.984]FSYE.V		N[+1]	609.289	3	1825.85	1825.85	0	-1.2	19	Non	192.08	192.08	192.08	2.4	1104	>sp|P02817|AMELX_BOVIN Amelogenin, X isoform OS=Bos taurus OX=9913 GN=AMELX PE=1 SV=2	1	hf1_eb_18273_84_20032023.ScanId;v=1;d1=16910.16910.3	controllerType=0 controllerNumber=1 scan=16910	42.0922
20690:2	1	P.LPPHPGHPGYINFS[+79.966]YE.V		S[+80]	952.921	2	1904.83	1904.84	0	-1.3	19	Non	393.23	289.4	269.37	5.76	1104	>sp|P02817|AMELX_BOVIN Amelogenin, X isoform OS=Bos taurus OX=9913 GN=AMELX PE=1 SV=2	1	hf1_eb_18273_84_20032023.ScanId;v=1;d1=18196.18196.2	controllerType=0 controllerNumber=1 scan=18196	44.4493
21379:3	1	P.LPPHPGHPGYIN[+0.984]FS[+79.966]YE.V		N[+1], S[+80]	635.944	3	1905.82	1905.82	0	-1	19	Non	89.54	89.54	88.4	1.42	1104	>sp|P02817|AMELX_BOVIN Amelogenin, X isoform OS=Bos taurus OX=9913 GN=AMELX PE=1 SV=2	1	hf1_eb_18273_84_20032023.ScanId;v=1;d1=18691.18691.3	controllerType=0 controllerNumber=1 scan=18691	45.339
21655:3	1	P.LPPHPGHPGYIN[+0.984]FS[+79.966]YE.V		N[+1], S[+80]	635.944	3	1905.82	1905.82	0	-2	19	Non	139.36	139.36	139.36	1.5	1104	>sp|P02817|AMELX_BOVIN Amelogenin, X isoform OS=Bos taurus OX=9913 GN=AMELX PE=1 SV=2	1	hf1_eb_18273_84_20032023.ScanId;v=1;d1=18883.18883.3	controllerType=0 controllerNumber=1 scan=18883	45.6825
21362:2	1	P.LPPHPGHPGYIN[+0.984]FS[+79.966]YE.V		N[+1], S[+80]	953.414	2	1905.82	1905.82	0	-0.3	19	Non	200.91	156.67	156.67	2.6	1104	>sp|P02817|AMELX_BOVIN Amelogenin, X isoform OS=Bos taurus OX=9913 GN=AMELX PE=1 SV=2	1	hf1_eb_18273_84_20032023.ScanId;v=1;d1=18679.18679.2	controllerType=0 controllerNumber=1 scan=18679	45.3183
21638:2	1	P.LPPHPGHPGYIN[+0.984]FS[+79.966]YE.V		N[+1], S[+80]	953.414	2	1905.82	1905.82	0	-0.4	19	Non	559.82	385.75	352.45	7.36	1104	>sp|P02817|AMELX_BOVIN Amelogenin, X isoform OS=Bos taurus OX=9913 GN=AMELX PE=1 SV=2	1	hf1_eb_18273_84_20032023.ScanId;v=1;d1=18871.18871.2	controllerType=0 controllerNumber=1 scan=18871	45.6622
25332:2	1	P.LPPHPGHPGYIN[+0.984]FS[+79.966]YEV.L		N[+1], S[+80]	1002.95	2	2004.89	2004.89	0	-0.4	19	Non	279.45	236.13	206.21	4.97	1104	>sp|P02817|AMELX_BOVIN Amelogenin, X isoform OS=Bos taurus OX=9913 GN=AMELX PE=1 SV=2	1	hf1_eb_18273_84_20032023.ScanId;v=1;d1=21481.21481.2	controllerType=0 controllerNumber=1 scan=21481	50.274
28473:3	1	P.LPPHPGHPGYINFS[+79.966]YEVL.T		S[+80]	706.334	3	2116.99	2116.99	0	-1.1	19	Non	153.34	153.34	19.31	2.38	1104	>sp|P02817|AMELX_BOVIN Amelogenin, X isoform OS=Bos taurus OX=9913 GN=AMELX PE=1 SV=2	1	hf1_eb_18273_84_20032023.ScanId;v=1;d1=23662.23662.3	controllerType=0 controllerNumber=1 scan=23662	54.1393
28773:3	1	P.LPPHPGHPGYINFS[+79.966]YEVL.T		S[+80]	706.333	3	2116.99	2116.99	0	-1.6	19	Non	171.02	171.02	68.81	2.69	1104	>sp|P02817|AMELX_BOVIN Amelogenin, X isoform OS=Bos taurus OX=9913 GN=AMELX PE=1 SV=2	1	hf1_eb_18273_84_20032023.ScanId;v=1;d1=23863.23863.3	controllerType=0 controllerNumber=1 scan=23863	54.4865
26665:3	1	P.LPPHPGHPGYIN[+0.984]FSYEVL.T		N[+1]	680.006	3	2038	2038.01	0	-2.2	19	Non	257.88	257.88	257.88	4.48	1104	>sp|P02817|AMELX_BOVIN Amelogenin, X isoform OS=Bos taurus OX=9913 GN=AMELX PE=1 SV=2	1	hf1_eb_18273_84_20032023.ScanId;v=1;d1=22410.22410.4	controllerType=0 controllerNumber=1 scan=22410	51.9447
26985:3	1	P.LPPHPGHPGYIN[+0.984]FSYEVL.T		N[+1]	680.007	3	2038.01	2038.01	0	-0.4	19	Non	276.58	276.58	276.58	4.69	1104	>sp|P02817|AMELX_BOVIN Amelogenin, X isoform OS=Bos taurus OX=9913 GN=AMELX PE=1 SV=2	1	hf1_eb_18273_84_20032023.ScanId;v=1;d1=22632.22632.3	controllerType=0 controllerNumber=1 scan=22632	52.3345
28798:2	1	P.LPPHPGHPGYINFS[+79.966]YEVL.T		S[+80]	1058.99	2	2116.97	2116.99	0	-6.7	19	Non	284.51	284.51	284.51	4.54	1104	>sp|P02817|AMELX_BOVIN Amelogenin, X isoform OS=Bos taurus OX=9913 GN=AMELX PE=1 SV=2	1	hf1_eb_18273_84_20032023.ScanId;v=1;d1=23883.23883.2	controllerType=0 controllerNumber=1 scan=23883	54.5241
28511:2	1	P.LPPHPGHPGYINFS[+79.966]YEVL.T		S[+80]	1059	2	2116.99	2116.99	0	0.5	19	Non	400.81	400.81	284.76	6.29	1104	>sp|P02817|AMELX_BOVIN Amelogenin, X isoform OS=Bos taurus OX=9913 GN=AMELX PE=1 SV=2	1	hf1_eb_18273_84_20032023.ScanId;v=1;d1=23689.23689.2	controllerType=0 controllerNumber=1 scan=23689	54.1834
28093:3	1	P.LPPHPGHPGYIN[+0.984]FS[+79.966]YEVL.T		N[+1], S[+80]	706.662	3	2117.97	2117.97	0	-1.5	19	Non	107.27	107.27	56.08	1.42	1104	>sp|P02817|AMELX_BOVIN Amelogenin, X isoform OS=Bos taurus OX=9913 GN=AMELX PE=1 SV=2	1	hf1_eb_18273_84_20032023.ScanId;v=1;d1=23393.23393.3	controllerType=0 controllerNumber=1 scan=23393	53.6625
29363:3	1	P.LPPHPGHPGYIN[+0.984]FS[+79.966]YEVL.T		N[+1], S[+80]	706.662	3	2117.97	2117.97	0	-1.2	19	Non	172.5	172.5	74.42	2.88	1104	>sp|P02817|AMELX_BOVIN Amelogenin, X isoform OS=Bos taurus OX=9913 GN=AMELX PE=1 SV=2	1	hf1_eb_18273_84_20032023.ScanId;v=1;d1=24272.24272.3	controllerType=0 controllerNumber=1 scan=24272	55.2166
29646:3	1	P.LPPHPGHPGYIN[+0.984]FS[+79.966]YEVL.T		N[+1], S[+80]	706.662	3	2117.97	2117.97	0	-1.2	19	Non	206.26	206.26	109.56	3.57	1104	>sp|P02817|AMELX_BOVIN Amelogenin, X isoform OS=Bos taurus OX=9913 GN=AMELX PE=1 SV=2	1	hf1_eb_18273_84_20032023.ScanId;v=1;d1=24469.24469.3	controllerType=0 controllerNumber=1 scan=24469	55.5648
29375:2	1	P.LPPHPGHPGYIN[+0.984]FS[+79.966]YEVL.T		N[+1], S[+80]	1059.49	2	2117.98	2117.97	0	1.1	19	Non	389.22	389.22	264.61	6.97	1104	>sp|P02817|AMELX_BOVIN Amelogenin, X isoform OS=Bos taurus OX=9913 GN=AMELX PE=1 SV=2	1	hf1_eb_18273_84_20032023.ScanId;v=1;d1=24280.24280.2	controllerType=0 controllerNumber=1 scan=24280	55.2306
29653:2	1	P.LPPHPGHPGYIN[+0.984]FS[+79.966]YEVL.T		N[+1], S[+80]	1059.49	2	2117.97	2117.97	0	-0.7	19	Non	547.02	547.02	275.28	7.36	1104	>sp|P02817|AMELX_BOVIN Amelogenin, X isoform OS=Bos taurus OX=9913 GN=AMELX PE=1 SV=2	1	hf1_eb_18273_84_20032023.ScanId;v=1;d1=24475.24475.2	controllerType=0 controllerNumber=1 scan=24475	55.5754
27178:3	1	P.LPPHPGHPGYINFS[+79.966]YEVLT.P		S[+80]	740.017	3	2218.04	2218.04	0	-0.7	19	Non	110.3	110.3	71.22	1.53	1104	>sp|P02817|AMELX_BOVIN Amelogenin, X isoform OS=Bos taurus OX=9913 GN=AMELX PE=1 SV=2	1	hf1_eb_18273_84_20032023.ScanId;v=1;d1=22769.22769.3	controllerType=0 controllerNumber=1 scan=22769	52.5794
26895:3	1	P.LPPHPGHPGYINFS[+79.966]YEVLT.P		S[+80]	740.016	3	2218.03	2218.04	0	-1.9	19	Non	174.93	174.93	37.61	2.35	1104	>sp|P02817|AMELX_BOVIN Amelogenin, X isoform OS=Bos taurus OX=9913 GN=AMELX PE=1 SV=2	1	hf1_eb_18273_84_20032023.ScanId;v=1;d1=22572.22572.3	controllerType=0 controllerNumber=1 scan=22572	52.2266
28246:2	1	P.LPPHPGHPGYIN[+0.984]FS[+79.966]YEVLT.P		N[+1], S[+80]	1110.01	2	2219.02	2219.02	0	-2.2	19	Non	53.38	53.38	53.38	2.26	1104	>sp|P02817|AMELX_BOVIN Amelogenin, X isoform OS=Bos taurus OX=9913 GN=AMELX PE=1 SV=2	1	hf1_eb_18273_84_20032023.ScanId;v=1;d1=23501.23501.2	controllerType=0 controllerNumber=1 scan=23501	53.8476
28138:3	1	P.LPPHPGHPGYIN[+0.984]FS[+79.966]YEVLT.P		N[+1], S[+80]	740.344	3	2219.02	2219.02	0	-1.3	19	Non	153.9	153.9	15.45	2.14	1104	>sp|P02817|AMELX_BOVIN Amelogenin, X isoform OS=Bos taurus OX=9913 GN=AMELX PE=1 SV=2	1	hf1_eb_18273_84_20032023.ScanId;v=1;d1=23426.23426.3	controllerType=0 controllerNumber=1 scan=23426	53.7193
27843:3	1	P.LPPHPGHPGYIN[+0.984]FS[+79.966]YEVLT.P		N[+1], S[+80]	740.345	3	2219.02	2219.02	0	-0.8	19	Non	157.19	157.19	43.6	2.14	1104	>sp|P02817|AMELX_BOVIN Amelogenin, X isoform OS=Bos taurus OX=9913 GN=AMELX PE=1 SV=2	1	hf1_eb_18273_84_20032023.ScanId;v=1;d1=23220.23220.3	controllerType=0 controllerNumber=1 scan=23220	53.3625
27933:2	1	P.LPPHPGHPGYIN[+0.984]FS[+79.966]YEVLT.P		N[+1], S[+80]	1110.01	2	2219.01	2219.02	0	-3.9	19	Non	193.67	175.03	175.03	2.66	1104	>sp|P02817|AMELX_BOVIN Amelogenin, X isoform OS=Bos taurus OX=9913 GN=AMELX PE=1 SV=2	1	hf1_eb_18273_84_20032023.ScanId;v=1;d1=23285.23285.2	controllerType=0 controllerNumber=1 scan=23285	53.4721
28725:2	1	P.LPPHPGHPGYINFS[+79.966]YEVLTP.L		S[+80]	1158.05	2	2315.09	2315.09	0	1.7	19	Non	147.06	147.06	28.96	2.79	1104	>sp|P02817|AMELX_BOVIN Amelogenin, X isoform OS=Bos taurus OX=9913 GN=AMELX PE=1 SV=2	1	hf1_eb_18273_84_20032023.ScanId;v=1;d1=23833.23833.2	controllerType=0 controllerNumber=1 scan=23833	54.4316
28591:3	1	P.LPPHPGHPGYINFS[+79.966]YEVLTP.L		S[+80]	772.367	3	2315.09	2315.09	0	-0.9	19	Non	187.9	72.75	69.54	1.44	1104	>sp|P02817|AMELX_BOVIN Amelogenin, X isoform OS=Bos taurus OX=9913 GN=AMELX PE=1 SV=2	1	hf1_eb_18273_84_20032023.ScanId;v=1;d1=23741.23741.3	controllerType=0 controllerNumber=1 scan=23741	54.2751
29710:2	1	P.LPPHPGHPGYIN[+0.984]FS[+79.966]YEVLTP.L		N[+1], S[+80]	1158.54	2	2316.08	2316.07	0	1	19	Non	105.28	105.28	71.09	2.25	1104	>sp|P02817|AMELX_BOVIN Amelogenin, X isoform OS=Bos taurus OX=9913 GN=AMELX PE=1 SV=2	1	hf1_eb_18273_84_20032023.ScanId;v=1;d1=24512.24512.2	controllerType=0 controllerNumber=1 scan=24512	55.6419
29394:3	1	P.LPPHPGHPGYIN[+0.984]FS[+79.966]YEVLTP.L		N[+1], S[+80]	772.695	3	2316.07	2316.07	0	-1.7	19	Non	224.26	224.26	106.32	3.48	1104	>sp|P02817|AMELX_BOVIN Amelogenin, X isoform OS=Bos taurus OX=9913 GN=AMELX PE=1 SV=2	1	hf1_eb_18273_84_20032023.ScanId;v=1;d1=24292.24292.3	controllerType=0 controllerNumber=1 scan=24292	55.2512
29671:3	1	P.LPPHPGHPGYIN[+0.984]FS[+79.966]YEVLTP.L		N[+1], S[+80]	772.695	3	2316.07	2316.07	0	-1.3	19	Non	295.49	173.33	154.39	4.74	1104	>sp|P02817|AMELX_BOVIN Amelogenin, X isoform OS=Bos taurus OX=9913 GN=AMELX PE=1 SV=2	1	hf1_eb_18273_84_20032023.ScanId;v=1;d1=24486.24486.3	controllerType=0 controllerNumber=1 scan=24486	55.5947
33083:2	1	P.LPPHPGHPGYINFS[+79.966]YEVLTPL.K		S[+80]	1214.59	2	2428.18	2428.17	0	2.3	19	Non	175.35	175.35	53.55	2.61	1104	>sp|P02817|AMELX_BOVIN Amelogenin, X isoform OS=Bos taurus OX=9913 GN=AMELX PE=1 SV=2	1	hf1_eb_18273_84_20032023.ScanId;v=1;d1=26878.26878.2	controllerType=0 controllerNumber=1 scan=26878	59.8903
31461:3	1	P.LPPHPGHPGYIN[+0.984]FSYEVLTPL.K		N[+1]	783.735	3	2349.19	2349.19	0	0	19	Non	261.6	261.6	261.6	4.93	1104	>sp|P02817|AMELX_BOVIN Amelogenin, X isoform OS=Bos taurus OX=9913 GN=AMELX PE=1 SV=2	1	hf1_eb_18273_84_20032023.ScanId;v=1;d1=25754.25754.3	controllerType=0 controllerNumber=1 scan=25754	57.8556
33193:3	1	P.LPPHPGHPGYINFS[+79.966]YEVLTPL.K		S[+80]	810.063	3	2428.17	2428.17	0	-0.1	19	Non	359.44	359.44	86.62	5.53	1104	>sp|P02817|AMELX_BOVIN Amelogenin, X isoform OS=Bos taurus OX=9913 GN=AMELX PE=1 SV=2	1	hf1_eb_18273_84_20032023.ScanId;v=1;d1=26951.26951.3	controllerType=0 controllerNumber=1 scan=26951	60.0224
34040:2	1	P.LPPHPGHPGYIN[+0.984]FS[+79.966]YEVLTPL.K		N[+1], S[+80]	1215.09	2	2429.16	2429.16	0	2.3	19	Non	51.05	51.05	42.74	1.43	1104	>sp|P02817|AMELX_BOVIN Amelogenin, X isoform OS=Bos taurus OX=9913 GN=AMELX PE=1 SV=2	1	hf1_eb_18273_84_20032023.ScanId;v=1;d1=27527.27527.2	controllerType=0 controllerNumber=1 scan=27527	61.0642
33379:2	1	P.LPPHPGHPGYIN[+0.984]FS[+79.966]YEVLTPL.K		N[+1], S[+80]	1215.09	2	2429.17	2429.16	0	3.3	19	Non	141.54	141.54	71.71	2.2	1104	>sp|P02817|AMELX_BOVIN Amelogenin, X isoform OS=Bos taurus OX=9913 GN=AMELX PE=1 SV=2	1	hf1_eb_18273_84_20032023.ScanId;v=1;d1=27076.27076.2	controllerType=0 controllerNumber=1 scan=27076	60.2494
34626:3	1	P.LPPHPGHPGYIN[+0.984]FS[+79.966]YEVLTPL.K		N[+1], S[+80]	810.391	3	2429.16	2429.16	0	0.4	19	Non	155.01	155.01	62.27	1.51	1104	>sp|P02817|AMELX_BOVIN Amelogenin, X isoform OS=Bos taurus OX=9913 GN=AMELX PE=1 SV=2	1	hf1_eb_18273_84_20032023.ScanId;v=1;d1=27915.27915.3	controllerType=0 controllerNumber=1 scan=27915	61.7513
33668:2	1	P.LPPHPGHPGYIN[+0.984]FS[+79.966]YEVLTPL.K		N[+1], S[+80]	1215.09	2	2429.17	2429.16	0	3.6	19	Non	161.09	161.09	88.79	2.61	1104	>sp|P02817|AMELX_BOVIN Amelogenin, X isoform OS=Bos taurus OX=9913 GN=AMELX PE=1 SV=2	1	hf1_eb_18273_84_20032023.ScanId;v=1;d1=27272.27272.2	controllerType=0 controllerNumber=1 scan=27272	60.6008
33761:3	1	P.LPPHPGHPGYIN[+0.984]FS[+79.966]YEVLTPL.K		N[+1], S[+80]	810.391	3	2429.16	2429.16	0	0.4	19	Non	244.68	244.68	85.68	4.48	1104	>sp|P02817|AMELX_BOVIN Amelogenin, X isoform OS=Bos taurus OX=9913 GN=AMELX PE=1 SV=2	1	hf1_eb_18273_84_20032023.ScanId;v=1;d1=27336.27336.3	controllerType=0 controllerNumber=1 scan=27336	60.7143
34342:2	1	P.LPPHPGHPGYIN[+0.984]FS[+79.966]YEVLTPL.K		N[+1], S[+80]	1215.08	2	2429.16	2429.16	0	-0.1	19	Non	249.15	249.15	101.99	5.31	1104	>sp|P02817|AMELX_BOVIN Amelogenin, X isoform OS=Bos taurus OX=9913 GN=AMELX PE=1 SV=2	1	hf1_eb_18273_84_20032023.ScanId;v=1;d1=27726.27726.2	controllerType=0 controllerNumber=1 scan=27726	61.4201
34032:3	1	P.LPPHPGHPGYIN[+0.984]FS[+79.966]YEVLTPL.K		N[+1], S[+80]	810.391	3	2429.16	2429.16	0	0.6	19	Non	253.26	253.26	70.66	4.48	1104	>sp|P02817|AMELX_BOVIN Amelogenin, X isoform OS=Bos taurus OX=9913 GN=AMELX PE=1 SV=2	1	hf1_eb_18273_84_20032023.ScanId;v=1;d1=27522.27522.3	controllerType=0 controllerNumber=1 scan=27522	61.0566
34322:3	1	P.LPPHPGHPGYIN[+0.984]FS[+79.966]YEVLTPL.K		N[+1], S[+80]	810.39	3	2429.16	2429.16	0	-0.9	19	Non	349.14	349.14	125.13	5.6	1104	>sp|P02817|AMELX_BOVIN Amelogenin, X isoform OS=Bos taurus OX=9913 GN=AMELX PE=1 SV=2	1	hf1_eb_18273_84_20032023.ScanId;v=1;d1=27714.27714.3	controllerType=0 controllerNumber=1 scan=27714	61.3992
33482:3	1	P.LPPHPGHPGYIN[+0.984]FS[+79.966]YEVLTPL.K		N[+1], S[+80]	810.392	3	2429.16	2429.16	0	1.2	19	Non	352.14	352.14	130.81	5.2	1104	>sp|P02817|AMELX_BOVIN Amelogenin, X isoform OS=Bos taurus OX=9913 GN=AMELX PE=1 SV=2	1	hf1_eb_18273_84_20032023.ScanId;v=1;d1=27146.27146.3	controllerType=0 controllerNumber=1 scan=27146	60.3747
27497:4	1	P.LPPHPGHPGYIN[+0.984]FSYEVLTPLK.W		N[+1]	620.077	4	2477.29	2477.29	0	0.1	19	NRagged	162.58	162.58	162.58	3.82	1104	>sp|P02817|AMELX_BOVIN Amelogenin, X isoform OS=Bos taurus OX=9913 GN=AMELX PE=1 SV=2	1	hf1_eb_18273_84_20032023.ScanId;v=1;d1=22984.22984.4	controllerType=0 controllerNumber=1 scan=22984	52.9537
26209:3	1	P.LPPHPGHPGYIN[+0.984]FSYEVLTPLK.W		N[+1]	826.433	3	2477.28	2477.29	0	-1	19	NRagged	409.38	409.38	409.38	7.84	1104	>sp|P02817|AMELX_BOVIN Amelogenin, X isoform OS=Bos taurus OX=9913 GN=AMELX PE=1 SV=2	1	hf1_eb_18273_84_20032023.ScanId;v=1;d1=22106.22106.3	controllerType=0 controllerNumber=1 scan=22106	51.3988
27077:3	1	P.LPPHPGHPGYIN[+0.984]FSYEVLTPLK.W		N[+1]	826.433	3	2477.29	2477.29	0	-0.2	19	NRagged	439.71	439.71	439.71	8.31	1104	>sp|P02817|AMELX_BOVIN Amelogenin, X isoform OS=Bos taurus OX=9913 GN=AMELX PE=1 SV=2	1	hf1_eb_18273_84_20032023.ScanId;v=1;d1=22694.22694.3	controllerType=0 controllerNumber=1 scan=22694	52.4442
27109:4	1	P.LPPHPGHPGYIN[+0.984]FSYEVLTPLK.W		N[+1]	620.076	4	2477.28	2477.29	0	-1.4	19	NRagged	493.3	493.3	493.3	7.98	1104	>sp|P02817|AMELX_BOVIN Amelogenin, X isoform OS=Bos taurus OX=9913 GN=AMELX PE=1 SV=2	1	hf1_eb_18273_84_20032023.ScanId;v=1;d1=22717.22717.4	controllerType=0 controllerNumber=1 scan=22717	52.4861
27795:3	1	P.LPPHPGHPGYINFS[+79.966]YEVLTPLK.W		S[+80]	852.761	3	2556.27	2556.27	0	0	19	NRagged	610.12	610.12	255.55	10.02	1104	>sp|P02817|AMELX_BOVIN Amelogenin, X isoform OS=Bos taurus OX=9913 GN=AMELX PE=1 SV=2	1	hf1_eb_18273_84_20032023.ScanId;v=1;d1=23187.23187.3	controllerType=0 controllerNumber=1 scan=23187	53.3057
28364:3	1	P.LPPHPGHPGYINFS[+79.966]YEVLTPLK.W		S[+80]	852.757	3	2556.26	2556.27	0	-4.4	19	NRagged	649.18	649.18	308.4	8.98	1104	>sp|P02817|AMELX_BOVIN Amelogenin, X isoform OS=Bos taurus OX=9913 GN=AMELX PE=1 SV=2	1	hf1_eb_18273_84_20032023.ScanId;v=1;d1=23582.23582.3	controllerType=0 controllerNumber=1 scan=23582	53.9936
27125:3	1	P.LPPHPGHPGYIN[+0.984]FSYEVLTPLK.W		N[+1]	826.433	3	2477.28	2477.29	0	-0.6	19	NRagged	664.93	664.93	664.93	11.02	1104	>sp|P02817|AMELX_BOVIN Amelogenin, X isoform OS=Bos taurus OX=9913 GN=AMELX PE=1 SV=2	1	hf1_eb_18273_84_20032023.ScanId;v=1;d1=22728.22728.3	controllerType=0 controllerNumber=1 scan=22728	52.5052
28082:3	1	P.LPPHPGHPGYINFS[+79.966]YEVLTPLK.W		S[+80]	852.759	3	2556.26	2556.27	0	-2.1	19	NRagged	1067.89	1067.89	534.6	18.8	1104	>sp|P02817|AMELX_BOVIN Amelogenin, X isoform OS=Bos taurus OX=9913 GN=AMELX PE=1 SV=2	1	hf1_eb_18273_84_20032023.ScanId;v=1;d1=23386.23386.3	controllerType=0 controllerNumber=1 scan=23386	53.6497
29006:4	1	P.LPPHPGHPGYIN[+0.984]FS[+79.966]YEVLTPLK.W		N[+1], S[+80]	640.067	4	2557.25	2557.25	0	-2.8	19	NRagged	415.75	415.75	189.23	7.3	1104	>sp|P02817|AMELX_BOVIN Amelogenin, X isoform OS=Bos taurus OX=9913 GN=AMELX PE=1 SV=2	1	hf1_eb_18273_84_20032023.ScanId;v=1;d1=24033.24033.4	controllerType=0 controllerNumber=1 scan=24033	54.7944
28738:4	1	P.LPPHPGHPGYIN[+0.984]FS[+79.966]YEVLTPLK.W		N[+1], S[+80]	640.068	4	2557.25	2557.25	0	-1.1	19	NRagged	450.75	450.75	211.75	8.02	1104	>sp|P02817|AMELX_BOVIN Amelogenin, X isoform OS=Bos taurus OX=9913 GN=AMELX PE=1 SV=2	1	hf1_eb_18273_84_20032023.ScanId;v=1;d1=23842.23842.4	controllerType=0 controllerNumber=1 scan=23842	54.4502
27562:3	1	P.LPPHPGHP[+15.995]GYINFS[+79.966]YEVLTPLK.W		P[+16], S[+80]	858.093	3	2572.27	2572.26	0	0.9	19	NRagged	469.9	469.9	0	7.31	1104	>sp|P02817|AMELX_BOVIN Amelogenin, X isoform OS=Bos taurus OX=9913 GN=AMELX PE=1 SV=2	1	hf1_eb_18273_84_20032023.ScanId;v=1;d1=23031.23031.3	controllerType=0 controllerNumber=1 scan=23031	53.0365
28789:2	1	P.LPPHPGHPGYIN[+0.984]FS[+79.966]YEVLTPLK.W		N[+1], S[+80]	1279.13	2	2557.25	2557.25	0	-0.5	19	NRagged	575.74	575.74	260.7	8	1104	>sp|P02817|AMELX_BOVIN Amelogenin, X isoform OS=Bos taurus OX=9913 GN=AMELX PE=1 SV=2	1	hf1_eb_18273_84_20032023.ScanId;v=1;d1=23875.23875.2	controllerType=0 controllerNumber=1 scan=23875	54.5065
27267:3	1	P.LPPHPGHP[+15.995]GYINFS[+79.966]YEVLTPLK.W		P[+16], S[+80]	858.092	3	2572.26	2572.26	0	-1	19	NRagged	639.02	639.02	6.54	10.02	1104	>sp|P02817|AMELX_BOVIN Amelogenin, X isoform OS=Bos taurus OX=9913 GN=AMELX PE=1 SV=2	1	hf1_eb_18273_84_20032023.ScanId;v=1;d1=22828.22828.3	controllerType=0 controllerNumber=1 scan=22828	52.6832
29219:3	1	P.LPPHPGHPGYIN[+0.984]FS[+79.966]YEVLTPLK.W		N[+1], S[+80]	853.089	3	2557.25	2557.25	0	-0.2	19	NRagged	876.32	876.32	445.81	15.02	1104	>sp|P02817|AMELX_BOVIN Amelogenin, X isoform OS=Bos taurus OX=9913 GN=AMELX PE=1 SV=2	1	hf1_eb_18273_84_20032023.ScanId;v=1;d1=24175.24175.3	controllerType=0 controllerNumber=1 scan=24175	55.0469
28652:3	1	P.LPPHPGHPGYIN[+0.984]FS[+79.966]YEVLTPLK.W		N[+1], S[+80]	853.089	3	2557.25	2557.25	0	-0.6	19	NRagged	1030.21	1030.21	465.76	18.02	1104	>sp|P02817|AMELX_BOVIN Amelogenin, X isoform OS=Bos taurus OX=9913 GN=AMELX PE=1 SV=2	1	hf1_eb_18273_84_20032023.ScanId;v=1;d1=23783.23783.3	controllerType=0 controllerNumber=1 scan=23783	54.3479
28928:3	1	P.LPPHPGHPGYIN[+0.984]FS[+79.966]YEVLTPLK.W		N[+1], S[+80]	853.087	3	2557.25	2557.25	0	-1.9	19	NRagged	1038.51	1038.51	520.64	17.8	1104	>sp|P02817|AMELX_BOVIN Amelogenin, X isoform OS=Bos taurus OX=9913 GN=AMELX PE=1 SV=2	1	hf1_eb_18273_84_20032023.ScanId;v=1;d1=23979.23979.3	controllerType=0 controllerNumber=1 scan=23979	54.6976
26981:3	1	P.LPPHPGHPGYIN[+0.984]FS[+79.966]Y[+15.995]EVLTPLK.W		N[+1], S[+80], Y[+16]	858.419	3	2573.24	2573.25	0	-1.5	19	NRagged	169.56	169.56	26.92	4.47	1104	>sp|P02817|AMELX_BOVIN Amelogenin, X isoform OS=Bos taurus OX=9913 GN=AMELX PE=1 SV=2	1	hf1_eb_18273_84_20032023.ScanId;v=1;d1=22630.22630.3	controllerType=0 controllerNumber=1 scan=22630	52.3315
28634:3	1	P.LPP[+15.995]HPGHPGYIN[+0.984]FS[+79.966]YEVLTPLK.W		N[+1], P[+16], S[+80]	858.42	3	2573.25	2573.25	0	-0.3	19	NRagged	465.62	465.62	7.14	7.87	1104	>sp|P02817|AMELX_BOVIN Amelogenin, X isoform OS=Bos taurus OX=9913 GN=AMELX PE=1 SV=2	1	hf1_eb_18273_84_20032023.ScanId;v=1;d1=23770.23770.3	controllerType=0 controllerNumber=1 scan=23770	54.3264
27563:3	1	P.LPPHPGH[+15.995]PGYIN[+0.984]FS[+79.966]YEVLTPLK.W		H[+16], N[+1], S[+80]	858.422	3	2573.25	2573.25	0	1.8	19	NRagged	482.96	482.96	3.55	7.49	1104	>sp|P02817|AMELX_BOVIN Amelogenin, X isoform OS=Bos taurus OX=9913 GN=AMELX PE=1 SV=2	1	hf1_eb_18273_84_20032023.ScanId;v=1;d1=23031.23031.3	controllerType=0 controllerNumber=1 scan=23031	53.0365
28351:3	1	P.LPPHPGHP[+15.995]GYIN[+0.984]FS[+79.966]YEVLTPLK.W		N[+1], P[+16], S[+80]	858.421	3	2573.25	2573.25	0	0.2	19	NRagged	513.58	513.58	0	8.3	1104	>sp|P02817|AMELX_BOVIN Amelogenin, X isoform OS=Bos taurus OX=9913 GN=AMELX PE=1 SV=2	1	hf1_eb_18273_84_20032023.ScanId;v=1;d1=23573.23573.3	controllerType=0 controllerNumber=1 scan=23573	53.9773
28058:3	1	P.LPPHPGHP[+15.995]GYIN[+0.984]FS[+79.966]YEVLTPLK.W		N[+1], P[+16], S[+80]	858.42	3	2573.25	2573.25	0	-0.7	19	NRagged	640.33	640.33	0	10.02	1104	>sp|P02817|AMELX_BOVIN Amelogenin, X isoform OS=Bos taurus OX=9913 GN=AMELX PE=1 SV=2	1	hf1_eb_18273_84_20032023.ScanId;v=1;d1=23369.23369.3	controllerType=0 controllerNumber=1 scan=23369	53.6186
33366:3	1	P.LPP[+31.990]HPGHPGYIN[+0.984]FS[+79.966]Y[+15.995]EVLTPLK.W		N[+1], P[+32], S[+80], Y[+16]	869.083	3	2605.24	2605.24	0	-0.7	19	NRagged	110.93	110.93	6.02	3.5	1104	>sp|P02817|AMELX_BOVIN Amelogenin, X isoform OS=Bos taurus OX=9913 GN=AMELX PE=1 SV=2	1	hf1_eb_18273_84_20032023.ScanId;v=1;d1=27067.27067.3	controllerType=0 controllerNumber=1 scan=27067	60.233
35590:3	1	P.LPPHPGHPGYINFS[+79.966]YEVLTPLKW.Y		S[+80]	914.779	3	2742.32	2742.35	0	-9.5	19	Non	102.26	102.26	102.26	2.12	1104	>sp|P02817|AMELX_BOVIN Amelogenin, X isoform OS=Bos taurus OX=9913 GN=AMELX PE=1 SV=2	1	hf1_eb_18273_84_20032023.ScanId;v=1;d1=28576.28576.3	controllerType=0 controllerNumber=1 scan=28576	62.9367
35211:3	1	P.LPPHPGHPGYIN[+0.984]FS[+79.966]YEVLTPLKW.Y		N[+1], S[+80]	915.116	3	2743.34	2743.33	0	1.1	19	Non	30.11	30.11	30.11	2.14	1104	>sp|P02817|AMELX_BOVIN Amelogenin, X isoform OS=Bos taurus OX=9913 GN=AMELX PE=1 SV=2	1	hf1_eb_18273_84_20032023.ScanId;v=1;d1=28309.28309.3	controllerType=0 controllerNumber=1 scan=28309	62.4595
35861:3	1	P.LPPHPGHPGYIN[+0.984]FS[+79.966]YEVLTPLKW.Y		N[+1], S[+80]	915.117	3	2743.34	2743.33	0	1.6	19	Non	82.56	82.56	9.7	3.16	1104	>sp|P02817|AMELX_BOVIN Amelogenin, X isoform OS=Bos taurus OX=9913 GN=AMELX PE=1 SV=2	1	hf1_eb_18273_84_20032023.ScanId;v=1;d1=28771.28771.3	controllerType=0 controllerNumber=1 scan=28771	63.2855
36003:3	1	P.LPPHPGHPGYINFS[+79.966]YEVLTPLKWY.Q		S[+80]	969.142	3	2905.41	2905.41	0	0.2	19	Non	154.7	154.7	94.18	3.81	1104	>sp|P02817|AMELX_BOVIN Amelogenin, X isoform OS=Bos taurus OX=9913 GN=AMELX PE=1 SV=2	1	hf1_eb_18273_84_20032023.ScanId;v=1;d1=28861.28861.3	controllerType=0 controllerNumber=1 scan=28861	63.4468
35802:3	1	P.LPPHPGHPGYINFS[+79.966]YEVLTPLKWYQ[+0.984].S		Q[+1], S[+80]	1012.15	3	3034.45	3034.45	0	-2.9	19	Non	23.82	23.82	23.82	1.51	1104	>sp|P02817|AMELX_BOVIN Amelogenin, X isoform OS=Bos taurus OX=9913 GN=AMELX PE=1 SV=2	1	hf1_eb_18273_84_20032023.ScanId;v=1;d1=28730.28730.3	controllerType=0 controllerNumber=1 scan=28730	63.2119
36122:3	1	P.LPPHPGHPGYINFS[+79.966]YEVLTPLKWYQ[+0.984].S		Q[+1], S[+80]	1012.15	3	3034.45	3034.45	0	-2	19	Non	421.05	421.05	114.76	6.93	1104	>sp|P02817|AMELX_BOVIN Amelogenin, X isoform OS=Bos taurus OX=9913 GN=AMELX PE=1 SV=2	1	hf1_eb_18273_84_20032023.ScanId;v=1;d1=28939.28939.3	controllerType=0 controllerNumber=1 scan=28939	63.5843
36224:3	1	P.LPPHPGHPGYIN[+0.984]FS[+79.966]YEVLTPLKWYQ[+0.984].S		N[+1], Q[+1], S[+80]	1012.48	3	3035.44	3035.44	0	-0.9	19	Non	244.9	219.33	219.33	5.16	1104	>sp|P02817|AMELX_BOVIN Amelogenin, X isoform OS=Bos taurus OX=9913 GN=AMELX PE=1 SV=2	1	hf1_eb_18273_84_20032023.ScanId;v=1;d1=29007.29007.3	controllerType=0 controllerNumber=1 scan=29007	63.7029
36083:3	1	P.LPPHPGHPGYIN[+0.984]FS[+79.966]YEVLTPLKWYQ[+0.984]S.M		N[+1], Q[+1], S[+80]	1041.5	3	3122.48	3122.47	0	2.5	19	Non	406.08	406.08	309.25	6.09	1104	>sp|P02817|AMELX_BOVIN Amelogenin, X isoform OS=Bos taurus OX=9913 GN=AMELX PE=1 SV=2	1	hf1_eb_18273_84_20032023.ScanId;v=1;d1=28913.28913.3	controllerType=0 controllerNumber=1 scan=28913	63.5394
05961:1	1	L.PPHPG.H			504.256	1	504.256	504.257	0	-0.7	20	Non	308.69	110.3	110.3	3.01	1104	>sp|P02817|AMELX_BOVIN Amelogenin, X isoform OS=Bos taurus OX=9913 GN=AMELX PE=1 SV=2	1	hf1_eb_18273_84_20032023.ScanId;v=1;d1=7177.7177.2	controllerType=0 controllerNumber=1 scan=7177	23.9204
06652:1	1	L.PPHPG.H			504.256	1	504.256	504.257	0	-1.8	20	Non	316.18	106.82	106.82	2.91	1104	>sp|P02817|AMELX_BOVIN Amelogenin, X isoform OS=Bos taurus OX=9913 GN=AMELX PE=1 SV=2	1	hf1_eb_18273_84_20032023.ScanId;v=1;d1=7741.7741.2	controllerType=0 controllerNumber=1 scan=7741	25.0928
03241:2	1	L.PPHPGHPG.Y			398.197	2	795.388	795.39	0	-2.5	20	Non	279.1	279.1	279.1	4.12	1104	>sp|P02817|AMELX_BOVIN Amelogenin, X isoform OS=Bos taurus OX=9913 GN=AMELX PE=1 SV=2	1	hf1_eb_18273_84_20032023.ScanId;v=1;d1=4878.4878.2	controllerType=0 controllerNumber=1 scan=4878	19.0015
03429:2	1	L.PPHPGHPG.Y			398.197	2	795.388	795.39	0	-2.4	20	Non	311.64	268.79	268.79	4.15	1104	>sp|P02817|AMELX_BOVIN Amelogenin, X isoform OS=Bos taurus OX=9913 GN=AMELX PE=1 SV=2	1	hf1_eb_18273_84_20032023.ScanId;v=1;d1=5040.5040.2	controllerType=0 controllerNumber=1 scan=5040	19.3367
02871:2	1	L.PPHPGHPG.Y			398.198	2	795.388	795.39	0	-1.9	20	Non	470.16	400.42	400.42	6	1104	>sp|P02817|AMELX_BOVIN Amelogenin, X isoform OS=Bos taurus OX=9913 GN=AMELX PE=1 SV=2	1	hf1_eb_18273_84_20032023.ScanId;v=1;d1=4588.4588.2	controllerType=0 controllerNumber=1 scan=4588	18.4473
02696:2	1	L.PPHPGHPG.Y			398.198	2	795.388	795.39	0	-1.9	20	Non	475.2	394.18	394.18	5.77	1104	>sp|P02817|AMELX_BOVIN Amelogenin, X isoform OS=Bos taurus OX=9913 GN=AMELX PE=1 SV=2	1	hf1_eb_18273_84_20032023.ScanId;v=1;d1=4429.4429.2	controllerType=0 controllerNumber=1 scan=4429	18.1006
00597:2	1	L.PPHPGHPG.Y			398.197	2	795.388	795.39	0	-2.5	20	Non	494.62	418.32	418.32	5.73	1104	>sp|P02817|AMELX_BOVIN Amelogenin, X isoform OS=Bos taurus OX=9913 GN=AMELX PE=1 SV=2	1	hf1_eb_18273_84_20032023.ScanId;v=1;d1=2885.2885.2	controllerType=0 controllerNumber=1 scan=2885	15.3393
02172:2	1	L.PPHPGHP[+15.995]G.Y		P[+16]	406.195	2	811.383	811.385	0	-2	20	Non	262.03	170.41	38.77	2.81	1104	>sp|P02817|AMELX_BOVIN Amelogenin, X isoform OS=Bos taurus OX=9913 GN=AMELX PE=1 SV=2	1	hf1_eb_18273_84_20032023.ScanId;v=1;d1=4036.4036.2	controllerType=0 controllerNumber=1 scan=4036	17.3906
01927:2	1	L.PPHPGHP[+15.995]G.Y		P[+16]	406.195	2	811.383	811.385	0	-2.2	20	Non	343.18	256.37	19.43	4.5	1104	>sp|P02817|AMELX_BOVIN Amelogenin, X isoform OS=Bos taurus OX=9913 GN=AMELX PE=1 SV=2	1	hf1_eb_18273_84_20032023.ScanId;v=1;d1=3844.3844.2	controllerType=0 controllerNumber=1 scan=3844	17.0404
02732:2	1	L.PPHPGHPGY.I			479.729	2	958.451	958.453	0	-2.2	20	Non	530.17	424.21	424.21	5.78	1104	>sp|P02817|AMELX_BOVIN Amelogenin, X isoform OS=Bos taurus OX=9913 GN=AMELX PE=1 SV=2	1	hf1_eb_18273_84_20032023.ScanId;v=1;d1=4458.4458.2	controllerType=0 controllerNumber=1 scan=4458	18.1559
01794:2	1	L.PPHPGHP[+15.995]GY.I		P[+16]	487.727	2	974.448	974.448	0	-0.3	20	Non	222.47	222.47	22.42	1.91	1104	>sp|P02817|AMELX_BOVIN Amelogenin, X isoform OS=Bos taurus OX=9913 GN=AMELX PE=1 SV=2	1	hf1_eb_18273_84_20032023.ScanId;v=1;d1=3743.3743.3	controllerType=0 controllerNumber=1 scan=3743	16.8566
12325:2	1	L.PPHPGHPGYI.N			536.271	2	1071.54	1071.54	0	-1.3	20	Non	311.71	164.76	164.76	3.5	1104	>sp|P02817|AMELX_BOVIN Amelogenin, X isoform OS=Bos taurus OX=9913 GN=AMELX PE=1 SV=2	1	hf1_eb_18273_84_20032023.ScanId;v=1;d1=12087.12087.2	controllerType=0 controllerNumber=1 scan=12087	33.4221
06470:2	1	L.PPHPGHPGYI.N			536.272	2	1071.54	1071.54	0	0.1	20	Non	335.38	137.56	137.56	3.48	1104	>sp|P02817|AMELX_BOVIN Amelogenin, X isoform OS=Bos taurus OX=9913 GN=AMELX PE=1 SV=2	1	hf1_eb_18273_84_20032023.ScanId;v=1;d1=7583.7583.2	controllerType=0 controllerNumber=1 scan=7583	24.7184
04912:3	1	L.PPHPGHPGYIN.F			395.864	3	1185.58	1185.58	0	-1.5	20	Non	281.36	281.36	281.36	4.35	1104	>sp|P02817|AMELX_BOVIN Amelogenin, X isoform OS=Bos taurus OX=9913 GN=AMELX PE=1 SV=2	1	hf1_eb_18273_84_20032023.ScanId;v=1;d1=6281.6281.3	controllerType=0 controllerNumber=1 scan=6281	22.0123
06314:3	1	L.PPHPGHPGYIN[+0.984].F		N[+1]	396.192	3	1186.56	1186.56	0	-0.9	20	Non	180.03	169.84	169.84	2.14	1104	>sp|P02817|AMELX_BOVIN Amelogenin, X isoform OS=Bos taurus OX=9913 GN=AMELX PE=1 SV=2	1	hf1_eb_18273_84_20032023.ScanId;v=1;d1=7460.7460.3	controllerType=0 controllerNumber=1 scan=7460	24.4929
05781:3	1	L.PPHPGHPGYIN[+0.984].F		N[+1]	396.193	3	1186.56	1186.56	0	-0.5	20	Non	331.05	331.05	331.05	4.9	1104	>sp|P02817|AMELX_BOVIN Amelogenin, X isoform OS=Bos taurus OX=9913 GN=AMELX PE=1 SV=2	1	hf1_eb_18273_84_20032023.ScanId;v=1;d1=7031.7031.3	controllerType=0 controllerNumber=1 scan=7031	23.6477
13256:3	1	L.PPHPGHPGYINF.S			444.887	3	1332.65	1332.65	0	-1.2	20	Non	246.91	246.91	246.91	3.86	1104	>sp|P02817|AMELX_BOVIN Amelogenin, X isoform OS=Bos taurus OX=9913 GN=AMELX PE=1 SV=2	1	hf1_eb_18273_84_20032023.ScanId;v=1;d1=12750.12750.3	controllerType=0 controllerNumber=1 scan=12750	34.6138
14418:3	1	L.PPHPGHPGYINF.S			444.887	3	1332.65	1332.65	0	-0.4	20	Non	263.41	263.41	263.41	4.19	1104	>sp|P02817|AMELX_BOVIN Amelogenin, X isoform OS=Bos taurus OX=9913 GN=AMELX PE=1 SV=2	1	hf1_eb_18273_84_20032023.ScanId;v=1;d1=13593.13593.3	controllerType=0 controllerNumber=1 scan=13593	36.1551
14142:3	1	L.PPHPGHPGYINF.S			444.887	3	1332.65	1332.65	0	-1.1	20	Non	264.9	264.9	264.9	3.86	1104	>sp|P02817|AMELX_BOVIN Amelogenin, X isoform OS=Bos taurus OX=9913 GN=AMELX PE=1 SV=2	1	hf1_eb_18273_84_20032023.ScanId;v=1;d1=13394.13394.3	controllerType=0 controllerNumber=1 scan=13394	35.7867
14444:3	1	L.PPHPGHPGYINF.S			444.887	3	1332.65	1332.65	0	-0.5	20	Non	291.27	291.27	291.27	4.68	1104	>sp|P02817|AMELX_BOVIN Amelogenin, X isoform OS=Bos taurus OX=9913 GN=AMELX PE=1 SV=2	1	hf1_eb_18273_84_20032023.ScanId;v=1;d1=13607.13607.3	controllerType=0 controllerNumber=1 scan=13607	36.1781
15505:2	1	L.PPHPGHPGYINF.S			666.827	2	1332.65	1332.65	0	-1.4	20	Non	299.76	299.76	299.76	4.67	1104	>sp|P02817|AMELX_BOVIN Amelogenin, X isoform OS=Bos taurus OX=9913 GN=AMELX PE=1 SV=2	1	hf1_eb_18273_84_20032023.ScanId;v=1;d1=14374.14374.2	controllerType=0 controllerNumber=1 scan=14374	37.5917
13294:2	1	L.PPHPGHPGYINF.S			666.827	2	1332.65	1332.65	0	-0.7	20	Non	416.21	396.17	396.17	5.96	1104	>sp|P02817|AMELX_BOVIN Amelogenin, X isoform OS=Bos taurus OX=9913 GN=AMELX PE=1 SV=2	1	hf1_eb_18273_84_20032023.ScanId;v=1;d1=12781.12781.2	controllerType=0 controllerNumber=1 scan=12781	34.6713
14185:2	1	L.PPHPGHPGYINF.S			666.828	2	1332.65	1332.65	0	0	20	Non	588.23	441.64	441.64	6.83	1104	>sp|P02817|AMELX_BOVIN Amelogenin, X isoform OS=Bos taurus OX=9913 GN=AMELX PE=1 SV=2	1	hf1_eb_18273_84_20032023.ScanId;v=1;d1=13428.13428.2	controllerType=0 controllerNumber=1 scan=13428	35.8522
13893:3	1	L.PPHPGHPGYIN[+0.984]F.S		N[+1]	445.215	3	1333.63	1333.63	0	-1.1	20	Non	216.34	204.56	204.56	2.34	1104	>sp|P02817|AMELX_BOVIN Amelogenin, X isoform OS=Bos taurus OX=9913 GN=AMELX PE=1 SV=2	1	hf1_eb_18273_84_20032023.ScanId;v=1;d1=13210.13210.3	controllerType=0 controllerNumber=1 scan=13210	35.45
13138:3	1	L.PPHPGHP[+15.995]GYINF.S		P[+16]	450.218	3	1348.64	1348.64	0	-2.3	20	Non	230.16	230.16	35.03	2.22	1104	>sp|P02817|AMELX_BOVIN Amelogenin, X isoform OS=Bos taurus OX=9913 GN=AMELX PE=1 SV=2	1	hf1_eb_18273_84_20032023.ScanId;v=1;d1=12664.12664.3	controllerType=0 controllerNumber=1 scan=12664	34.4601
15125:3	1	L.PPHPGHPGYIN[+0.984]F.S		N[+1]	445.215	3	1333.63	1333.63	0	-1.6	20	Non	279.7	240.65	240.65	3.65	1104	>sp|P02817|AMELX_BOVIN Amelogenin, X isoform OS=Bos taurus OX=9913 GN=AMELX PE=1 SV=2	1	hf1_eb_18273_84_20032023.ScanId;v=1;d1=14099.14099.3	controllerType=0 controllerNumber=1 scan=14099	37.0821
13072:3	1	L.PPHPGHPGYIN[+0.984]F.S		N[+1]	445.215	3	1333.63	1333.63	0	-0.9	20	Non	298.24	253.19	253.19	4.54	1104	>sp|P02817|AMELX_BOVIN Amelogenin, X isoform OS=Bos taurus OX=9913 GN=AMELX PE=1 SV=2	1	hf1_eb_18273_84_20032023.ScanId;v=1;d1=12615.12615.3	controllerType=0 controllerNumber=1 scan=12615	34.3734
15646:3	1	L.PPHPGHPGYIN[+0.984]F.S		N[+1]	445.215	3	1333.63	1333.63	0	-1.3	20	Non	307.24	291.81	291.81	4.68	1104	>sp|P02817|AMELX_BOVIN Amelogenin, X isoform OS=Bos taurus OX=9913 GN=AMELX PE=1 SV=2	1	hf1_eb_18273_84_20032023.ScanId;v=1;d1=14478.14478.3	controllerType=0 controllerNumber=1 scan=14478	37.7805
13618:3	1	L.PPHPGHPGYIN[+0.984]F.S		N[+1]	445.215	3	1333.63	1333.63	0	-1.6	20	Non	315.56	274.86	274.86	4.33	1104	>sp|P02817|AMELX_BOVIN Amelogenin, X isoform OS=Bos taurus OX=9913 GN=AMELX PE=1 SV=2	1	hf1_eb_18273_84_20032023.ScanId;v=1;d1=13016.13016.3	controllerType=0 controllerNumber=1 scan=13016	35.0936
13068:2	1	L.PPHPGHPGYIN[+0.984]F.S		N[+1]	667.319	2	1333.63	1333.63	0	-1	20	Non	315.9	259.73	259.73	4.53	1104	>sp|P02817|AMELX_BOVIN Amelogenin, X isoform OS=Bos taurus OX=9913 GN=AMELX PE=1 SV=2	1	hf1_eb_18273_84_20032023.ScanId;v=1;d1=12611.12611.2	controllerType=0 controllerNumber=1 scan=12611	34.3676
15391:3	1	L.PPHPGHPGYIN[+0.984]F.S		N[+1]	445.216	3	1333.63	1333.63	0	-0.1	20	Non	316.47	251.08	251.08	4.54	1104	>sp|P02817|AMELX_BOVIN Amelogenin, X isoform OS=Bos taurus OX=9913 GN=AMELX PE=1 SV=2	1	hf1_eb_18273_84_20032023.ScanId;v=1;d1=14290.14290.3	controllerType=0 controllerNumber=1 scan=14290	37.4331
13878:2	1	L.PPHPGHPGYIN[+0.984]F.S		N[+1]	667.319	2	1333.63	1333.63	0	-1	20	Non	377.32	218.99	218.99	4.9	1104	>sp|P02817|AMELX_BOVIN Amelogenin, X isoform OS=Bos taurus OX=9913 GN=AMELX PE=1 SV=2	1	hf1_eb_18273_84_20032023.ScanId;v=1;d1=13201.13201.2	controllerType=0 controllerNumber=1 scan=13201	35.4339
13604:2	1	L.PPHPGHPGYIN[+0.984]F.S		N[+1]	667.318	2	1333.63	1333.63	0	-2	20	Non	473.93	396.86	396.86	5.94	1104	>sp|P02817|AMELX_BOVIN Amelogenin, X isoform OS=Bos taurus OX=9913 GN=AMELX PE=1 SV=2	1	hf1_eb_18273_84_20032023.ScanId;v=1;d1=13006.13006.2	controllerType=0 controllerNumber=1 scan=13006	35.0766
15250:2	1	L.PPHPGHPGYIN[+0.984]F.S		N[+1]	667.32	2	1333.63	1333.63	0	-0.4	20	Non	605.92	483.59	483.59	7.77	1104	>sp|P02817|AMELX_BOVIN Amelogenin, X isoform OS=Bos taurus OX=9913 GN=AMELX PE=1 SV=2	1	hf1_eb_18273_84_20032023.ScanId;v=1;d1=14191.14191.2	controllerType=0 controllerNumber=1 scan=14191	37.248
15506:2	1	L.PPHPGHPGYIN[+0.984]F.S		N[+1]	667.319	2	1333.63	1333.63	0	-0.5	20	Non	641.71	546.22	546.22	7.83	1104	>sp|P02817|AMELX_BOVIN Amelogenin, X isoform OS=Bos taurus OX=9913 GN=AMELX PE=1 SV=2	1	hf1_eb_18273_84_20032023.ScanId;v=1;d1=14374.14374.2	controllerType=0 controllerNumber=1 scan=14374	37.5917
13547:3	1	L.PPHPGHP[+15.995]GYIN[+0.984]F.S		N[+1], P[+16]	450.546	3	1349.62	1349.63	0	-2.3	20	Non	242.9	235.31	52.51	3.03	1104	>sp|P02817|AMELX_BOVIN Amelogenin, X isoform OS=Bos taurus OX=9913 GN=AMELX PE=1 SV=2	1	hf1_eb_18273_84_20032023.ScanId;v=1;d1=12964.12964.3	controllerType=0 controllerNumber=1 scan=12964	34.9978
19999:2	1	L.PP[+15.995]HPGHPGYIN[+0.984]F.S		N[+1], P[+16]	675.317	2	1349.63	1349.63	0	-0.5	20	Non	261.61	155.09	0	2.59	1104	>sp|P02817|AMELX_BOVIN Amelogenin, X isoform OS=Bos taurus OX=9913 GN=AMELX PE=1 SV=2	1	hf1_eb_18273_84_20032023.ScanId;v=1;d1=17699.17699.2	controllerType=0 controllerNumber=1 scan=17699	43.5518
13656:2	1	L.PPHPGHP[+15.995]GYIN[+0.984]F.S		N[+1], P[+16]	675.316	2	1349.62	1349.63	0	-1.9	20	Non	400.46	347.91	28.07	4.97	1104	>sp|P02817|AMELX_BOVIN Amelogenin, X isoform OS=Bos taurus OX=9913 GN=AMELX PE=1 SV=2	1	hf1_eb_18273_84_20032023.ScanId;v=1;d1=13043.13043.2	controllerType=0 controllerNumber=1 scan=13043	35.1467
14455:3	1	L.PPHPGHPGYIN[+0.984]FS.Y		N[+1]	474.226	3	1420.66	1420.66	0	-1	20	Non	247.27	178.82	178.82	3.05	1104	>sp|P02817|AMELX_BOVIN Amelogenin, X isoform OS=Bos taurus OX=9913 GN=AMELX PE=1 SV=2	1	hf1_eb_18273_84_20032023.ScanId;v=1;d1=13615.13615.3	controllerType=0 controllerNumber=1 scan=13615	36.1923
15589:2	1	L.PPHPGHPGYINFS[+79.966].Y		S[+80]	750.327	2	1499.65	1499.65	0	0	20	Non	546.74	420.23	397.96	6.37	1104	>sp|P02817|AMELX_BOVIN Amelogenin, X isoform OS=Bos taurus OX=9913 GN=AMELX PE=1 SV=2	1	hf1_eb_18273_84_20032023.ScanId;v=1;d1=14433.14433.4	controllerType=0 controllerNumber=1 scan=14433	37.6994
16875:3	1	L.PPHPGHPGYIN[+0.984]FS[+79.966].Y		N[+1], S[+80]	500.881	3	1500.63	1500.63	0	-2.4	20	Non	319.95	263.41	263.41	4.64	1104	>sp|P02817|AMELX_BOVIN Amelogenin, X isoform OS=Bos taurus OX=9913 GN=AMELX PE=1 SV=2	1	hf1_eb_18273_84_20032023.ScanId;v=1;d1=15360.15360.3	controllerType=0 controllerNumber=1 scan=15360	39.3123
17051:2	1	L.PPHPGHPGYIN[+0.984]FS[+79.966].Y		N[+1], S[+80]	750.82	2	1500.63	1500.63	0	1.5	20	Non	390.85	339.5	277.08	5.14	1104	>sp|P02817|AMELX_BOVIN Amelogenin, X isoform OS=Bos taurus OX=9913 GN=AMELX PE=1 SV=2	1	hf1_eb_18273_84_20032023.ScanId;v=1;d1=15492.15492.4	controllerType=0 controllerNumber=1 scan=15492	39.5509
15503:2	1	L.PPHPGHPGYIN[+0.984]FS[+79.966].Y		N[+1], S[+80]	750.819	2	1500.63	1500.63	0	-0.3	20	Non	465.35	379.73	358.5	6.3	1104	>sp|P02817|AMELX_BOVIN Amelogenin, X isoform OS=Bos taurus OX=9913 GN=AMELX PE=1 SV=2	1	hf1_eb_18273_84_20032023.ScanId;v=1;d1=14372.14372.4	controllerType=0 controllerNumber=1 scan=14372	37.586
16787:2	1	L.PPHPGHPGYIN[+0.984]FS[+79.966].Y		N[+1], S[+80]	750.818	2	1500.63	1500.63	0	-1.9	20	Non	530.68	500.34	457.05	6.85	1104	>sp|P02817|AMELX_BOVIN Amelogenin, X isoform OS=Bos taurus OX=9913 GN=AMELX PE=1 SV=2	1	hf1_eb_18273_84_20032023.ScanId;v=1;d1=15294.15294.2	controllerType=0 controllerNumber=1 scan=15294	39.1955
21430:2	1	L.PPHPGHPGYIN[+0.984]FS[+79.966]Y.E		N[+1], S[+80]	832.349	2	1663.69	1663.69	0	-2.1	20	Non	354.3	295.76	295.76	5.12	1104	>sp|P02817|AMELX_BOVIN Amelogenin, X isoform OS=Bos taurus OX=9913 GN=AMELX PE=1 SV=2	1	hf1_eb_18273_84_20032023.ScanId;v=1;d1=18726.18726.2	controllerType=0 controllerNumber=1 scan=18726	45.4002
20274:2	1	L.PPHPGHPGYIN[+0.984]FS[+79.966]YE.V		N[+1], S[+80]	896.871	2	1792.74	1792.74	0	-0.5	20	Non	288.09	278.89	254.67	5.17	1104	>sp|P02817|AMELX_BOVIN Amelogenin, X isoform OS=Bos taurus OX=9913 GN=AMELX PE=1 SV=2	1	hf1_eb_18273_84_20032023.ScanId;v=1;d1=17902.17902.2	controllerType=0 controllerNumber=1 scan=17902	43.925
28687:3	1	L.PPHPGHPGYIN[+0.984]FS[+79.966]YEVL.T		N[+1], S[+80]	668.967	3	2004.89	2004.89	0	-0.9	20	Non	167.25	167.25	125.87	2.4	1104	>sp|P02817|AMELX_BOVIN Amelogenin, X isoform OS=Bos taurus OX=9913 GN=AMELX PE=1 SV=2	1	hf1_eb_18273_84_20032023.ScanId;v=1;d1=23808.23808.3	controllerType=0 controllerNumber=1 scan=23808	54.3896
28720:2	1	L.PPHPGHPGYIN[+0.984]FS[+79.966]YEVL.T		N[+1], S[+80]	1002.95	2	2004.89	2004.89	0	0.5	20	Non	213.04	202	172.2	3.55	1104	>sp|P02817|AMELX_BOVIN Amelogenin, X isoform OS=Bos taurus OX=9913 GN=AMELX PE=1 SV=2	1	hf1_eb_18273_84_20032023.ScanId;v=1;d1=23830.23830.2	controllerType=0 controllerNumber=1 scan=23830	54.4271
27085:3	1	L.PPHPGHPGYIN[+0.984]FS[+79.966]YEVLT.P		N[+1], S[+80]	702.65	3	2105.93	2105.94	0	-1.3	20	Non	106.18	106.18	82.74	1.42	1104	>sp|P02817|AMELX_BOVIN Amelogenin, X isoform OS=Bos taurus OX=9913 GN=AMELX PE=1 SV=2	1	hf1_eb_18273_84_20032023.ScanId;v=1;d1=22700.22700.3	controllerType=0 controllerNumber=1 scan=22700	52.4559
32698:3	1	L.PPHPGHPGYIN[+0.984]FS[+79.966]YEVLTPL.K		N[+1], S[+80]	772.696	3	2316.07	2316.07	0	0.2	20	Non	144.55	144.55	141.42	2.14	1104	>sp|P02817|AMELX_BOVIN Amelogenin, X isoform OS=Bos taurus OX=9913 GN=AMELX PE=1 SV=2	1	hf1_eb_18273_84_20032023.ScanId;v=1;d1=26618.26618.3	controllerType=0 controllerNumber=1 scan=26618	59.4281
33507:3	1	L.PPHPGHPGYIN[+0.984]FS[+79.966]YEVLTPL.K		N[+1], S[+80]	772.697	3	2316.07	2316.07	0	0.6	20	Non	162.69	162.69	113.39	2.7	1104	>sp|P02817|AMELX_BOVIN Amelogenin, X isoform OS=Bos taurus OX=9913 GN=AMELX PE=1 SV=2	1	hf1_eb_18273_84_20032023.ScanId;v=1;d1=27163.27163.3	controllerType=0 controllerNumber=1 scan=27163	60.4029
33519:3	1	L.PPHPGHPGYIN[+0.984]FS[+79.966]YEVLTPL.K		N[+1], S[+80]	772.696	3	2316.07	2316.07	0	0.2	20	Non	223.18	223.18	168.85	3.37	1104	>sp|P02817|AMELX_BOVIN Amelogenin, X isoform OS=Bos taurus OX=9913 GN=AMELX PE=1 SV=2	1	hf1_eb_18273_84_20032023.ScanId;v=1;d1=27172.27172.3	controllerType=0 controllerNumber=1 scan=27172	60.4194
26449:3	1	L.PPHPGHPGYINFSYEVLTPLK.W			788.405	3	2363.2	2363.22	0	-7.4	20	NRagged	175.31	175.31	175.31	3.05	1104	>sp|P02817|AMELX_BOVIN Amelogenin, X isoform OS=Bos taurus OX=9913 GN=AMELX PE=1 SV=2	1	hf1_eb_18273_84_20032023.ScanId;v=1;d1=22262.22262.3	controllerType=0 controllerNumber=1 scan=22262	51.6761
27303:4	1	L.PPHPGHPGYINFSY[+31.990]EVLTPLK.W		Y[+32]	599.558	4	2395.21	2395.21	0	0	20	NRagged	45.23	45.23	28.16	1.69	1104	>sp|P02817|AMELX_BOVIN Amelogenin, X isoform OS=Bos taurus OX=9913 GN=AMELX PE=1 SV=2	1	hf1_eb_18273_84_20032023.ScanId;v=1;d1=22853.22853.4	controllerType=0 controllerNumber=1 scan=22853	52.7252
26432:4	1	L.PPHPGHPGYIN[+0.984]FSYEVLTPLK.W		N[+1]	591.806	4	2364.2	2364.2	0	0.1	20	NRagged	81.16	81.16	81.16	1.69	1104	>sp|P02817|AMELX_BOVIN Amelogenin, X isoform OS=Bos taurus OX=9913 GN=AMELX PE=1 SV=2	1	hf1_eb_18273_84_20032023.ScanId;v=1;d1=22251.22251.3	controllerType=0 controllerNumber=1 scan=22251	51.6572
27151:3	1	L.PPHPGHPGYINFS[+79.966]YEVLTPLK.W		S[+80]	815.064	3	2443.18	2443.18	0	-3.1	20	NRagged	828.28	828.28	456.74	13.85	1104	>sp|P02817|AMELX_BOVIN Amelogenin, X isoform OS=Bos taurus OX=9913 GN=AMELX PE=1 SV=2	1	hf1_eb_18273_84_20032023.ScanId;v=1;d1=22749.22749.3	controllerType=0 controllerNumber=1 scan=22749	52.5449
32712:3	1	L.PPHP[+15.995]GHPGYIN[+0.984]FSYEVLTPLK.W		N[+1], P[+16]	794.064	3	2380.18	2380.2	0	-8.3	20	NRagged	138.07	138.07	0	1.59	1104	>sp|P02817|AMELX_BOVIN Amelogenin, X isoform OS=Bos taurus OX=9913 GN=AMELX PE=1 SV=2	1	hf1_eb_18273_84_20032023.ScanId;v=1;d1=26627.26627.2	controllerType=0 controllerNumber=1 scan=26627	59.4444
28115:4	1	L.PPHPGHPGYIN[+0.984]FS[+79.966]YEVLTPLK.W		N[+1], S[+80]	611.797	4	2444.17	2444.17	0	-0.3	20	NRagged	231.66	231.66	43.64	4.59	1104	>sp|P02817|AMELX_BOVIN Amelogenin, X isoform OS=Bos taurus OX=9913 GN=AMELX PE=1 SV=2	1	hf1_eb_18273_84_20032023.ScanId;v=1;d1=23408.23408.4	controllerType=0 controllerNumber=1 scan=23408	53.6867
28353:3	1	L.PPHPGHPGYIN[+0.984]FS[+79.966]YEVLTPLK.W		N[+1], S[+80]	815.395	3	2444.17	2444.17	0	0.3	20	NRagged	581.13	581.13	342.59	8.59	1104	>sp|P02817|AMELX_BOVIN Amelogenin, X isoform OS=Bos taurus OX=9913 GN=AMELX PE=1 SV=2	1	hf1_eb_18273_84_20032023.ScanId;v=1;d1=23575.23575.3	controllerType=0 controllerNumber=1 scan=23575	53.9803
28059:3	1	L.PPHPGHPGYIN[+0.984]FS[+79.966]YEVLTPLK.W		N[+1], S[+80]	815.394	3	2444.17	2444.17	0	-0.8	20	NRagged	720.41	720.41	422.06	12.06	1104	>sp|P02817|AMELX_BOVIN Amelogenin, X isoform OS=Bos taurus OX=9913 GN=AMELX PE=1 SV=2	1	hf1_eb_18273_84_20032023.ScanId;v=1;d1=23370.23370.3	controllerType=0 controllerNumber=1 scan=23370	53.6201
34155:3	1	L.PPHPGHPGYINFS[+79.966]YEVLTPLKW.Y		S[+80]	877.092	3	2629.26	2629.26	0	-1.3	20	Non	12.06	12.06	12.06	1.51	1104	>sp|P02817|AMELX_BOVIN Amelogenin, X isoform OS=Bos taurus OX=9913 GN=AMELX PE=1 SV=2	1	hf1_eb_18273_84_20032023.ScanId;v=1;d1=27601.27601.3	controllerType=0 controllerNumber=1 scan=27601	61.1952
04124:1	1	P.PHPG.H			407.203	1	407.203	407.204	0	-1.3	21	Non	259.23	14.99	14.99	2.17	1104	>sp|P02817|AMELX_BOVIN Amelogenin, X isoform OS=Bos taurus OX=9913 GN=AMELX PE=1 SV=2	1	hf1_eb_18273_84_20032023.ScanId;v=1;d1=5637.5637.2	controllerType=0 controllerNumber=1 scan=5637	20.6822
03949:1	1	P.PHPG.H			407.203	1	407.203	407.204	0	-1.6	21	Non	271.65	47.96	47.96	2.58	1104	>sp|P02817|AMELX_BOVIN Amelogenin, X isoform OS=Bos taurus OX=9913 GN=AMELX PE=1 SV=2	1	hf1_eb_18273_84_20032023.ScanId;v=1;d1=5488.5488.2	controllerType=0 controllerNumber=1 scan=5488	20.3381
03797:1	1	P.PHPG.H			407.203	1	407.203	407.204	0	-1.7	21	Non	278.44	42.86	42.86	2.58	1104	>sp|P02817|AMELX_BOVIN Amelogenin, X isoform OS=Bos taurus OX=9913 GN=AMELX PE=1 SV=2	1	hf1_eb_18273_84_20032023.ScanId;v=1;d1=5346.5346.2	controllerType=0 controllerNumber=1 scan=5346	19.9887
02160:1	1	P.PHPGH.P			544.262	1	544.262	544.263	0	-1.5	21	Non	312.48	50.38	50.38	2.27	1104	>sp|P02817|AMELX_BOVIN Amelogenin, X isoform OS=Bos taurus OX=9913 GN=AMELX PE=1 SV=2	1	hf1_eb_18273_84_20032023.ScanId;v=1;d1=4025.4025.2	controllerType=0 controllerNumber=1 scan=4025	17.3698
03530:1	1	P.PHPGHP.G			641.314	1	641.314	641.315	0	-1.8	21	Non	271.84	9.32	9.32	1.5	1104	>sp|P02817|AMELX_BOVIN Amelogenin, X isoform OS=Bos taurus OX=9913 GN=AMELX PE=1 SV=2	1	hf1_eb_18273_84_20032023.ScanId;v=1;d1=5120.5120.2	controllerType=0 controllerNumber=1 scan=5120	19.4979
01654:2	1	P.PHPGHPGY.I			431.203	2	861.399	861.4	0	-1.7	21	Non	516.34	386	386	5.73	1104	>sp|P02817|AMELX_BOVIN Amelogenin, X isoform OS=Bos taurus OX=9913 GN=AMELX PE=1 SV=2	1	hf1_eb_18273_84_20032023.ScanId;v=1;d1=3646.3646.2	controllerType=0 controllerNumber=1 scan=3646	16.6904
03622:2	1	P.PHPGHPGYIN.F			544.767	2	1088.53	1088.53	0	-0.8	21	Non	460.49	198.45	198.45	4.65	1104	>sp|P02817|AMELX_BOVIN Amelogenin, X isoform OS=Bos taurus OX=9913 GN=AMELX PE=1 SV=2	1	hf1_eb_18273_84_20032023.ScanId;v=1;d1=5201.5201.2	controllerType=0 controllerNumber=1 scan=5201	19.6685
03960:2	1	P.PHPGHPGYIN[+0.984].F		N[+1]	545.264	2	1089.52	1089.51	0	9.5	21	Non	276.03	276.03	276.03	3.08	1104	>sp|P02817|AMELX_BOVIN Amelogenin, X isoform OS=Bos taurus OX=9913 GN=AMELX PE=1 SV=2	1	hf1_eb_18273_84_20032023.ScanId;v=1;d1=5496.5496.2	controllerType=0 controllerNumber=1 scan=5496	20.3595
04132:2	1	P.PHPGHPGYIN[+0.984].F		N[+1]	545.264	2	1089.52	1089.51	0	9.5	21	Non	374.92	355.82	355.82	3.82	1104	>sp|P02817|AMELX_BOVIN Amelogenin, X isoform OS=Bos taurus OX=9913 GN=AMELX PE=1 SV=2	1	hf1_eb_18273_84_20032023.ScanId;v=1;d1=5644.5644.2	controllerType=0 controllerNumber=1 scan=5644	20.6973
04464:2	1	P.PHPGHPGYIN[+0.984].F		N[+1]	545.258	2	1089.51	1089.51	0	-1.9	21	Non	445.2	201.1	201.1	5.12	1104	>sp|P02817|AMELX_BOVIN Amelogenin, X isoform OS=Bos taurus OX=9913 GN=AMELX PE=1 SV=2	1	hf1_eb_18273_84_20032023.ScanId;v=1;d1=5923.5923.2	controllerType=0 controllerNumber=1 scan=5923	21.3009
04698:2	1	P.PHPGHPGYIN[+0.984].F		N[+1]	545.259	2	1089.51	1089.51	0	-0.7	21	Non	504.37	244.86	244.86	5.34	1104	>sp|P02817|AMELX_BOVIN Amelogenin, X isoform OS=Bos taurus OX=9913 GN=AMELX PE=1 SV=2	1	hf1_eb_18273_84_20032023.ScanId;v=1;d1=6103.6103.2	controllerType=0 controllerNumber=1 scan=6103	21.6516
12874:3	1	P.PHPGHPGYINF.S			412.536	3	1235.59	1235.6	0	-0.7	21	Non	173.97	173.97	173.97	2.47	1104	>sp|P02817|AMELX_BOVIN Amelogenin, X isoform OS=Bos taurus OX=9913 GN=AMELX PE=1 SV=2	1	hf1_eb_18273_84_20032023.ScanId;v=1;d1=12475.12475.3	controllerType=0 controllerNumber=1 scan=12475	34.1316
12876:2	1	P.PHPGHPGYINF.S			618.3	2	1235.59	1235.6	0	-2.4	21	Non	244.98	244.98	244.98	3.37	1104	>sp|P02817|AMELX_BOVIN Amelogenin, X isoform OS=Bos taurus OX=9913 GN=AMELX PE=1 SV=2	1	hf1_eb_18273_84_20032023.ScanId;v=1;d1=12476.12476.2	controllerType=0 controllerNumber=1 scan=12476	34.1327
12499:3	1	P.PHPGHPGYINF.S			412.537	3	1235.6	1235.6	0	0	21	Non	266.16	266.16	266.16	3.86	1104	>sp|P02817|AMELX_BOVIN Amelogenin, X isoform OS=Bos taurus OX=9913 GN=AMELX PE=1 SV=2	1	hf1_eb_18273_84_20032023.ScanId;v=1;d1=12210.12210.3	controllerType=0 controllerNumber=1 scan=12210	33.6492
12782:3	1	P.PHPGHPGYINF.S			412.537	3	1235.6	1235.6	0	-0.3	21	Non	272.69	272.69	272.69	4.19	1104	>sp|P02817|AMELX_BOVIN Amelogenin, X isoform OS=Bos taurus OX=9913 GN=AMELX PE=1 SV=2	1	hf1_eb_18273_84_20032023.ScanId;v=1;d1=12403.12403.3	controllerType=0 controllerNumber=1 scan=12403	33.9932
13533:3	1	P.PHPGHPGYINF.S			412.536	3	1235.59	1235.6	0	-1.5	21	Non	307.98	307.98	307.98	4.79	1104	>sp|P02817|AMELX_BOVIN Amelogenin, X isoform OS=Bos taurus OX=9913 GN=AMELX PE=1 SV=2	1	hf1_eb_18273_84_20032023.ScanId;v=1;d1=12953.12953.3	controllerType=0 controllerNumber=1 scan=12953	34.9794
12739:2	1	P.PHPGHPGYINF.S			618.301	2	1235.59	1235.6	0	-0.6	21	Non	315.65	315.65	315.65	4.67	1104	>sp|P02817|AMELX_BOVIN Amelogenin, X isoform OS=Bos taurus OX=9913 GN=AMELX PE=1 SV=2	1	hf1_eb_18273_84_20032023.ScanId;v=1;d1=12372.12372.2	controllerType=0 controllerNumber=1 scan=12372	33.9375
13412:2	1	P.PHPGHPGYINF.S			618.301	2	1235.6	1235.6	0	-0.1	21	Non	425.84	425.84	425.84	6.06	1104	>sp|P02817|AMELX_BOVIN Amelogenin, X isoform OS=Bos taurus OX=9913 GN=AMELX PE=1 SV=2	1	hf1_eb_18273_84_20032023.ScanId;v=1;d1=12864.12864.2	controllerType=0 controllerNumber=1 scan=12864	34.8189
13526:2	1	P.PHPGHPGYINF.S			618.3	2	1235.59	1235.6	0	-2.2	21	Non	577.46	547.08	547.08	6.84	1104	>sp|P02817|AMELX_BOVIN Amelogenin, X isoform OS=Bos taurus OX=9913 GN=AMELX PE=1 SV=2	1	hf1_eb_18273_84_20032023.ScanId;v=1;d1=12949.12949.2	controllerType=0 controllerNumber=1 scan=12949	34.9745
15943:3	1	P.PHPGHPGYIN[+0.984]F.S		N[+1]	412.864	3	1236.58	1236.58	0	-2.3	21	Non	162.61	162.61	162.61	1.69	1104	>sp|P02817|AMELX_BOVIN Amelogenin, X isoform OS=Bos taurus OX=9913 GN=AMELX PE=1 SV=2	1	hf1_eb_18273_84_20032023.ScanId;v=1;d1=14679.14679.3	controllerType=0 controllerNumber=1 scan=14679	38.1196
15138:3	1	P.PHPGHPGYIN[+0.984]F.S		N[+1]	412.864	3	1236.58	1236.58	0	-2.1	21	Non	220.8	220.8	220.8	2.61	1104	>sp|P02817|AMELX_BOVIN Amelogenin, X isoform OS=Bos taurus OX=9913 GN=AMELX PE=1 SV=2	1	hf1_eb_18273_84_20032023.ScanId;v=1;d1=14109.14109.3	controllerType=0 controllerNumber=1 scan=14109	37.0995
14088:3	1	P.PHPGHPGYIN[+0.984]F.S		N[+1]	412.864	3	1236.58	1236.58	0	-1	21	Non	248.09	248.09	248.09	4.19	1104	>sp|P02817|AMELX_BOVIN Amelogenin, X isoform OS=Bos taurus OX=9913 GN=AMELX PE=1 SV=2	1	hf1_eb_18273_84_20032023.ScanId;v=1;d1=13356.13356.3	controllerType=0 controllerNumber=1 scan=13356	35.7204
14876:3	1	P.PHPGHPGYIN[+0.984]F.S		N[+1]	412.864	3	1236.58	1236.58	0	-2.2	21	Non	283.81	283.81	283.81	4.47	1104	>sp|P02817|AMELX_BOVIN Amelogenin, X isoform OS=Bos taurus OX=9913 GN=AMELX PE=1 SV=2	1	hf1_eb_18273_84_20032023.ScanId;v=1;d1=13918.13918.3	controllerType=0 controllerNumber=1 scan=13918	36.748
12311:3	1	P.PHPGHPGYIN[+0.984]F.S		N[+1]	412.865	3	1236.58	1236.58	0	0.1	21	Non	285.58	285.58	285.58	4.68	1104	>sp|P02817|AMELX_BOVIN Amelogenin, X isoform OS=Bos taurus OX=9913 GN=AMELX PE=1 SV=2	1	hf1_eb_18273_84_20032023.ScanId;v=1;d1=12074.12074.3	controllerType=0 controllerNumber=1 scan=12074	33.3972
14629:3	1	P.PHPGHPGYIN[+0.984]F.S		N[+1]	412.864	3	1236.58	1236.58	0	-2.1	21	Non	298.69	298.69	298.69	4.47	1104	>sp|P02817|AMELX_BOVIN Amelogenin, X isoform OS=Bos taurus OX=9913 GN=AMELX PE=1 SV=2	1	hf1_eb_18273_84_20032023.ScanId;v=1;d1=13735.13735.3	controllerType=0 controllerNumber=1 scan=13735	36.4086
14351:3	1	P.PHPGHPGYIN[+0.984]F.S		N[+1]	412.865	3	1236.58	1236.58	0	0.6	21	Non	305.65	305.65	305.65	4.45	1104	>sp|P02817|AMELX_BOVIN Amelogenin, X isoform OS=Bos taurus OX=9913 GN=AMELX PE=1 SV=2	1	hf1_eb_18273_84_20032023.ScanId;v=1;d1=13546.13546.3	controllerType=0 controllerNumber=1 scan=13546	36.0728
13204:3	1	P.PHPGHPGYIN[+0.984]F.S		N[+1]	412.864	3	1236.58	1236.58	0	-1.1	21	Non	337.15	337.15	337.15	4.79	1104	>sp|P02817|AMELX_BOVIN Amelogenin, X isoform OS=Bos taurus OX=9913 GN=AMELX PE=1 SV=2	1	hf1_eb_18273_84_20032023.ScanId;v=1;d1=12716.12716.3	controllerType=0 controllerNumber=1 scan=12716	34.5541
14894:2	1	P.PHPGHPGYIN[+0.984]F.S		N[+1]	618.794	2	1236.58	1236.58	0	1	21	Non	379.69	376.69	376.69	5.77	1104	>sp|P02817|AMELX_BOVIN Amelogenin, X isoform OS=Bos taurus OX=9913 GN=AMELX PE=1 SV=2	1	hf1_eb_18273_84_20032023.ScanId;v=1;d1=13929.13929.2	controllerType=0 controllerNumber=1 scan=13929	36.7671
13028:2	1	P.PHPGHPGYIN[+0.984]F.S		N[+1]	618.793	2	1236.58	1236.58	0	-0.5	21	Non	409.57	398.99	398.99	6.13	1104	>sp|P02817|AMELX_BOVIN Amelogenin, X isoform OS=Bos taurus OX=9913 GN=AMELX PE=1 SV=2	1	hf1_eb_18273_84_20032023.ScanId;v=1;d1=12583.12583.2	controllerType=0 controllerNumber=1 scan=12583	34.3195
14633:2	1	P.PHPGHPGYIN[+0.984]F.S		N[+1]	618.792	2	1236.58	1236.58	0	-2.3	21	Non	589.14	508.11	508.11	7.31	1104	>sp|P02817|AMELX_BOVIN Amelogenin, X isoform OS=Bos taurus OX=9913 GN=AMELX PE=1 SV=2	1	hf1_eb_18273_84_20032023.ScanId;v=1;d1=13740.13740.2	controllerType=0 controllerNumber=1 scan=13740	36.418
13285:2	1	P.PHPGHPGYIN[+0.984]F.S		N[+1]	618.793	2	1236.58	1236.58	0	-1.2	21	Non	594.04	560.84	560.84	7.53	1104	>sp|P02817|AMELX_BOVIN Amelogenin, X isoform OS=Bos taurus OX=9913 GN=AMELX PE=1 SV=2	1	hf1_eb_18273_84_20032023.ScanId;v=1;d1=12773.12773.2	controllerType=0 controllerNumber=1 scan=12773	34.659
14352:2	1	P.PHPGHPGYIN[+0.984]F.S		N[+1]	618.793	2	1236.58	1236.58	0	-0.8	21	Non	602.64	540.61	540.61	8.53	1104	>sp|P02817|AMELX_BOVIN Amelogenin, X isoform OS=Bos taurus OX=9913 GN=AMELX PE=1 SV=2	1	hf1_eb_18273_84_20032023.ScanId;v=1;d1=13547.13547.2	controllerType=0 controllerNumber=1 scan=13547	36.0734
14099:2	1	P.PHPGHPGYIN[+0.984]F.S		N[+1]	618.793	2	1236.58	1236.58	0	-0.8	21	Non	615.71	584.94	584.94	8.53	1104	>sp|P02817|AMELX_BOVIN Amelogenin, X isoform OS=Bos taurus OX=9913 GN=AMELX PE=1 SV=2	1	hf1_eb_18273_84_20032023.ScanId;v=1;d1=13363.13363.2	controllerType=0 controllerNumber=1 scan=13363	35.7302
13289:3	1	P.PHPGHP[+15.995]GYIN[+0.984]F.S		N[+1], P[+16]	418.196	3	1252.57	1252.57	0	-1.2	21	Non	267.2	223.36	30.26	3.82	1104	>sp|P02817|AMELX_BOVIN Amelogenin, X isoform OS=Bos taurus OX=9913 GN=AMELX PE=1 SV=2	1	hf1_eb_18273_84_20032023.ScanId;v=1;d1=12778.12778.3	controllerType=0 controllerNumber=1 scan=12778	34.6673
18854:2	1	P.P[+31.990]HPGHPGYIN[+0.984]F.S		N[+1], P[+32]	634.788	2	1268.57	1268.57	0	-0.6	21	Non	525.68	351.15	93.58	5.33	1104	>sp|P02817|AMELX_BOVIN Amelogenin, X isoform OS=Bos taurus OX=9913 GN=AMELX PE=1 SV=2	1	hf1_eb_18273_84_20032023.ScanId;v=1;d1=16845.16845.2	controllerType=0 controllerNumber=1 scan=16845	41.9765
14600:2	1	P.PHPGHPGYINFS[+79.966].Y		S[+80]	701.801	2	1402.59	1402.59	0	0.1	21	Non	318.47	318.47	192.16	5.11	1104	>sp|P02817|AMELX_BOVIN Amelogenin, X isoform OS=Bos taurus OX=9913 GN=AMELX PE=1 SV=2	1	hf1_eb_18273_84_20032023.ScanId;v=1;d1=13713.13713.2	controllerType=0 controllerNumber=1 scan=13713	36.3686
13537:3	1	P.PHPGHPGYIN[+0.984]FS.Y		N[+1]	441.875	3	1323.61	1323.61	0	-1.5	21	Non	320.27	223.29	223.29	4.31	1104	>sp|P02817|AMELX_BOVIN Amelogenin, X isoform OS=Bos taurus OX=9913 GN=AMELX PE=1 SV=2	1	hf1_eb_18273_84_20032023.ScanId;v=1;d1=12955.12955.3	controllerType=0 controllerNumber=1 scan=12955	34.9816
13095:2	1	P.PHPGHPGYIN[+0.984]FS.Y		N[+1]	662.309	2	1323.61	1323.61	0	-1	21	Non	450.92	373.56	373.56	6.16	1104	>sp|P02817|AMELX_BOVIN Amelogenin, X isoform OS=Bos taurus OX=9913 GN=AMELX PE=1 SV=2	1	hf1_eb_18273_84_20032023.ScanId;v=1;d1=12632.12632.2	controllerType=0 controllerNumber=1 scan=12632	34.4036
14955:2	1	P.PHPGHPGYINFS[+79.966].Y		S[+80]	701.798	2	1402.59	1402.59	0	-3.3	21	Non	573.77	573.77	365.86	7.31	1104	>sp|P02817|AMELX_BOVIN Amelogenin, X isoform OS=Bos taurus OX=9913 GN=AMELX PE=1 SV=2	1	hf1_eb_18273_84_20032023.ScanId;v=1;d1=13974.13974.2	controllerType=0 controllerNumber=1 scan=13974	36.8553
16361:3	1	P.PHPGHPGYIN[+0.984]FS[+79.966].Y		N[+1], S[+80]	468.53	3	1403.58	1403.58	0	-1.4	21	Non	344.18	273.15	257.57	4.67	1104	>sp|P02817|AMELX_BOVIN Amelogenin, X isoform OS=Bos taurus OX=9913 GN=AMELX PE=1 SV=2	1	hf1_eb_18273_84_20032023.ScanId;v=1;d1=14982.14982.3	controllerType=0 controllerNumber=1 scan=14982	38.6548
14882:2	1	P.PHPGHPGYIN[+0.984]FS[+79.966].Y		N[+1], S[+80]	702.29	2	1403.57	1403.58	0	-3.9	21	Non	469.64	457.67	286.81	5.81	1104	>sp|P02817|AMELX_BOVIN Amelogenin, X isoform OS=Bos taurus OX=9913 GN=AMELX PE=1 SV=2	1	hf1_eb_18273_84_20032023.ScanId;v=1;d1=13921.13921.2	controllerType=0 controllerNumber=1 scan=13921	36.7525
15865:2	1	P.PHPGHPGYIN[+0.984]FS[+79.966].Y		N[+1], S[+80]	702.292	2	1403.58	1403.58	0	-0.4	21	Non	509	509	327.62	6.81	1104	>sp|P02817|AMELX_BOVIN Amelogenin, X isoform OS=Bos taurus OX=9913 GN=AMELX PE=1 SV=2	1	hf1_eb_18273_84_20032023.ScanId;v=1;d1=14631.14631.2	controllerType=0 controllerNumber=1 scan=14631	38.0396
14956:2	1	P.PHPGHPGYIN[+0.984]FS[+79.966].Y		N[+1], S[+80]	702.292	2	1403.58	1403.58	0	-1.6	21	Non	561.59	535.95	350.51	7.31	1104	>sp|P02817|AMELX_BOVIN Amelogenin, X isoform OS=Bos taurus OX=9913 GN=AMELX PE=1 SV=2	1	hf1_eb_18273_84_20032023.ScanId;v=1;d1=13974.13974.2	controllerType=0 controllerNumber=1 scan=13974	36.8553
16445:2	1	P.PHPGHPGYIN[+0.984]FS[+79.966].Y		N[+1], S[+80]	702.291	2	1403.57	1403.58	0	-2.2	21	Non	626.21	580.26	428.15	8.31	1104	>sp|P02817|AMELX_BOVIN Amelogenin, X isoform OS=Bos taurus OX=9913 GN=AMELX PE=1 SV=2	1	hf1_eb_18273_84_20032023.ScanId;v=1;d1=15039.15039.2	controllerType=0 controllerNumber=1 scan=15039	38.7512
21312:2	1	P.PHPGHPGYIN[+0.984]FS[+79.966]Y.E		N[+1], S[+80]	783.824	2	1566.64	1566.64	0	-0.3	21	Non	421.13	356.7	308.38	6.25	1104	>sp|P02817|AMELX_BOVIN Amelogenin, X isoform OS=Bos taurus OX=9913 GN=AMELX PE=1 SV=2	1	hf1_eb_18273_84_20032023.ScanId;v=1;d1=18642.18642.2	controllerType=0 controllerNumber=1 scan=18642	45.2519
20133:2	1	P.PHPGHPGYIN[+0.984]FS[+79.966]YE.V		N[+1], S[+80]	848.346	2	1695.68	1695.68	0	0.3	21	Non	334.27	292.98	249.63	5.4	1104	>sp|P02817|AMELX_BOVIN Amelogenin, X isoform OS=Bos taurus OX=9913 GN=AMELX PE=1 SV=2	1	hf1_eb_18273_84_20032023.ScanId;v=1;d1=17800.17800.2	controllerType=0 controllerNumber=1 scan=17800	43.7429
28778:2	1	P.PHPGHPGYIN[+0.984]FS[+79.966]YEVL.T		N[+1], S[+80]	954.421	2	1907.83	1907.84	0	-1	21	Non	257.82	257.82	199.25	4.68	1104	>sp|P02817|AMELX_BOVIN Amelogenin, X isoform OS=Bos taurus OX=9913 GN=AMELX PE=1 SV=2	1	hf1_eb_18273_84_20032023.ScanId;v=1;d1=23866.23866.2	controllerType=0 controllerNumber=1 scan=23866	54.4911
27156:2	1	P.PHPGHPGYIN[+0.984]FS[+79.966]YEVLT.P		N[+1], S[+80]	1004.94	2	2008.88	2008.88	0	-1.9	21	Non	121.91	113.09	113.09	2.45	1104	>sp|P02817|AMELX_BOVIN Amelogenin, X isoform OS=Bos taurus OX=9913 GN=AMELX PE=1 SV=2	1	hf1_eb_18273_84_20032023.ScanId;v=1;d1=22752.22752.2	controllerType=0 controllerNumber=1 scan=22752	52.5495
28887:2	1	P.PHPGHPGYIN[+0.984]FS[+79.966]YEVLTP.L		N[+1], S[+80]	1053.47	2	2105.93	2105.94	0	-1	21	Non	179.28	179.28	72.92	3.59	1104	>sp|P02817|AMELX_BOVIN Amelogenin, X isoform OS=Bos taurus OX=9913 GN=AMELX PE=1 SV=2	1	hf1_eb_18273_84_20032023.ScanId;v=1;d1=23949.23949.2	controllerType=0 controllerNumber=1 scan=23949	54.6425
28891:3	1	P.PHPGHPGYIN[+0.984]FS[+79.966]YEVLTP.L		N[+1], S[+80]	702.649	3	2105.93	2105.94	0	-2.8	21	Non	210.84	210.84	118.92	3.36	1104	>sp|P02817|AMELX_BOVIN Amelogenin, X isoform OS=Bos taurus OX=9913 GN=AMELX PE=1 SV=2	1	hf1_eb_18273_84_20032023.ScanId;v=1;d1=23953.23953.3	controllerType=0 controllerNumber=1 scan=23953	54.6512
32534:2	1	P.PHPGHPGYINFS[+79.966]YEVLTPL.K		S[+80]	1109.52	2	2218.04	2218.04	0	1	21	Non	183.05	183.05	91.37	3.39	1104	>sp|P02817|AMELX_BOVIN Amelogenin, X isoform OS=Bos taurus OX=9913 GN=AMELX PE=1 SV=2	1	hf1_eb_18273_84_20032023.ScanId;v=1;d1=26507.26507.2	controllerType=0 controllerNumber=1 scan=26507	59.2298
32523:3	1	P.PHPGHPGYINFS[+79.966]YEVLTPL.K		S[+80]	740.017	3	2218.04	2218.04	0	0.1	21	Non	242.62	242.62	137.72	4.49	1104	>sp|P02817|AMELX_BOVIN Amelogenin, X isoform OS=Bos taurus OX=9913 GN=AMELX PE=1 SV=2	1	hf1_eb_18273_84_20032023.ScanId;v=1;d1=26499.26499.3	controllerType=0 controllerNumber=1 scan=26499	59.2148
33815:3	1	P.PHPGHPGYIN[+0.984]FS[+79.966]YEVLTPL.K		N[+1], S[+80]	740.345	3	2219.02	2219.02	0	0.2	21	Non	85.98	85.98	39.51	1.53	1104	>sp|P02817|AMELX_BOVIN Amelogenin, X isoform OS=Bos taurus OX=9913 GN=AMELX PE=1 SV=2	1	hf1_eb_18273_84_20032023.ScanId;v=1;d1=27376.27376.3	controllerType=0 controllerNumber=1 scan=27376	60.7914
33542:3	1	P.PHPGHPGYIN[+0.984]FS[+79.966]YEVLTPL.K		N[+1], S[+80]	740.345	3	2219.02	2219.02	0	0.1	21	Non	116.96	116.96	61.54	1.53	1104	>sp|P02817|AMELX_BOVIN Amelogenin, X isoform OS=Bos taurus OX=9913 GN=AMELX PE=1 SV=2	1	hf1_eb_18273_84_20032023.ScanId;v=1;d1=27188.27188.3	controllerType=0 controllerNumber=1 scan=27188	60.4493
33644:2	1	P.PHPGHPGYIN[+0.984]FS[+79.966]YEVLTPL.K		N[+1], S[+80]	1110.02	2	2219.03	2219.02	0	3.5	21	Non	168.74	168.74	128.26	2.61	1104	>sp|P02817|AMELX_BOVIN Amelogenin, X isoform OS=Bos taurus OX=9913 GN=AMELX PE=1 SV=2	1	hf1_eb_18273_84_20032023.ScanId;v=1;d1=27255.27255.2	controllerType=0 controllerNumber=1 scan=27255	60.5702
32829:2	1	P.PHPGHPGYIN[+0.984]FS[+79.966]YEVLTPL.K		N[+1], S[+80]	1110.02	2	2219.02	2219.02	0	1.1	21	Non	240.16	240.16	157.1	4.93	1104	>sp|P02817|AMELX_BOVIN Amelogenin, X isoform OS=Bos taurus OX=9913 GN=AMELX PE=1 SV=2	1	hf1_eb_18273_84_20032023.ScanId;v=1;d1=26707.26707.2	controllerType=0 controllerNumber=1 scan=26707	59.5873
32811:3	1	P.PHPGHPGYIN[+0.984]FS[+79.966]YEVLTPL.K		N[+1], S[+80]	740.345	3	2219.02	2219.02	0	0.2	21	Non	279.46	279.46	143.2	4.93	1104	>sp|P02817|AMELX_BOVIN Amelogenin, X isoform OS=Bos taurus OX=9913 GN=AMELX PE=1 SV=2	1	hf1_eb_18273_84_20032023.ScanId;v=1;d1=26696.26696.3	controllerType=0 controllerNumber=1 scan=26696	59.568
26330:4	1	P.PHPGHPGYIN[+0.984]FSYEVLTPLK.W		N[+1]	567.543	4	2267.15	2267.15	0	1	21	NRagged	510.12	510.12	510.12	7.69	1104	>sp|P02817|AMELX_BOVIN Amelogenin, X isoform OS=Bos taurus OX=9913 GN=AMELX PE=1 SV=2	1	hf1_eb_18273_84_20032023.ScanId;v=1;d1=22184.22184.4	controllerType=0 controllerNumber=1 scan=22184	51.5372
27059:3	1	P.PHPGHPGYINFS[+79.966]YEVLTPLK.W		S[+80]	782.713	3	2346.12	2346.13	0	-3.4	21	NRagged	530.6	530.6	301.24	7.35	1104	>sp|P02817|AMELX_BOVIN Amelogenin, X isoform OS=Bos taurus OX=9913 GN=AMELX PE=1 SV=2	1	hf1_eb_18273_84_20032023.ScanId;v=1;d1=22680.22680.3	controllerType=0 controllerNumber=1 scan=22680	52.4185
27348:3	1	P.PHPGHPGYINFS[+79.966]YEVLTPLK.W		S[+80]	782.715	3	2346.13	2346.13	0	-1.2	21	NRagged	687.08	687.08	293.41	11.06	1104	>sp|P02817|AMELX_BOVIN Amelogenin, X isoform OS=Bos taurus OX=9913 GN=AMELX PE=1 SV=2	1	hf1_eb_18273_84_20032023.ScanId;v=1;d1=22884.22884.3	controllerType=0 controllerNumber=1 scan=22884	52.7797
27661:3	1	P.PHPGHPGYIN[+0.984]FS[+79.966]YEVLTPLK.W		N[+1], S[+80]	783.042	3	2347.11	2347.12	0	-1.5	21	NRagged	144.87	144.87	75.38	3.33	1104	>sp|P02817|AMELX_BOVIN Amelogenin, X isoform OS=Bos taurus OX=9913 GN=AMELX PE=1 SV=2	1	hf1_eb_18273_84_20032023.ScanId;v=1;d1=23094.23094.3	controllerType=0 controllerNumber=1 scan=23094	53.1413
26357:3	1	P.PHPGHPGYIN[+0.984]FS[+79.966]YEVLTPLK.W		N[+1], S[+80]	783.043	3	2347.11	2347.12	0	-0.4	21	NRagged	172.28	172.28	83.74	4.18	1104	>sp|P02817|AMELX_BOVIN Amelogenin, X isoform OS=Bos taurus OX=9913 GN=AMELX PE=1 SV=2	1	hf1_eb_18273_84_20032023.ScanId;v=1;d1=22200.22200.3	controllerType=0 controllerNumber=1 scan=22200	51.5639
28589:3	1	P.PHPGHPGYIN[+0.984]FS[+79.966]YEVLTPLK.W		N[+1], S[+80]	783.041	3	2347.11	2347.12	0	-3.3	21	NRagged	232.02	232.02	102.6	3.98	1104	>sp|P02817|AMELX_BOVIN Amelogenin, X isoform OS=Bos taurus OX=9913 GN=AMELX PE=1 SV=2	1	hf1_eb_18273_84_20032023.ScanId;v=1;d1=23740.23740.3	controllerType=0 controllerNumber=1 scan=23740	54.2736
28194:2	1	P.PHPGHPGYIN[+0.984]FS[+79.966]YEVLTPLK.W		N[+1], S[+80]	1174.06	2	2347.11	2347.12	0	-1	21	NRagged	492.78	492.78	225.86	7.8	1104	>sp|P02817|AMELX_BOVIN Amelogenin, X isoform OS=Bos taurus OX=9913 GN=AMELX PE=1 SV=2	1	hf1_eb_18273_84_20032023.ScanId;v=1;d1=23464.23464.2	controllerType=0 controllerNumber=1 scan=23464	53.7825
27349:3	1	P.PHPGHPGYIN[+0.984]FS[+79.966]YEVLTPLK.W		N[+1], S[+80]	783.044	3	2347.12	2347.12	0	0.3	21	NRagged	768.88	768.88	400.47	13.06	1104	>sp|P02817|AMELX_BOVIN Amelogenin, X isoform OS=Bos taurus OX=9913 GN=AMELX PE=1 SV=2	1	hf1_eb_18273_84_20032023.ScanId;v=1;d1=22884.22884.3	controllerType=0 controllerNumber=1 scan=22884	52.7797
28010:3	1	P.PHPGHPGYIN[+0.984]FS[+79.966]YEVLTPLK.W		N[+1], S[+80]	783.043	3	2347.11	2347.12	0	-1	21	NRagged	847.64	847.64	436.94	14.06	1104	>sp|P02817|AMELX_BOVIN Amelogenin, X isoform OS=Bos taurus OX=9913 GN=AMELX PE=1 SV=2	1	hf1_eb_18273_84_20032023.ScanId;v=1;d1=23338.23338.3	controllerType=0 controllerNumber=1 scan=23338	53.5638
28294:3	1	P.PHPGHPGYIN[+0.984]FS[+79.966]YEVLTPLK.W		N[+1], S[+80]	783.043	3	2347.11	2347.12	0	-1.1	21	NRagged	1007.67	1007.67	548.54	18.06	1104	>sp|P02817|AMELX_BOVIN Amelogenin, X isoform OS=Bos taurus OX=9913 GN=AMELX PE=1 SV=2	1	hf1_eb_18273_84_20032023.ScanId;v=1;d1=23536.23536.3	controllerType=0 controllerNumber=1 scan=23536	53.9108
01048:2	1	P.HPGHPGY.I			382.676	2	764.346	764.347	0	-2.4	22	Non	467.66	384.49	384.49	5.6	1104	>sp|P02817|AMELX_BOVIN Amelogenin, X isoform OS=Bos taurus OX=9913 GN=AMELX PE=1 SV=2	1	hf1_eb_18273_84_20032023.ScanId;v=1;d1=3211.3211.2	controllerType=0 controllerNumber=1 scan=3211	15.9172
03121:2	1	P.HPGHPGYIN.F			496.24	2	991.473	991.474	0	-1.1	22	Non	512.09	512.09	512.09	5.89	1104	>sp|P02817|AMELX_BOVIN Amelogenin, X isoform OS=Bos taurus OX=9913 GN=AMELX PE=1 SV=2	1	hf1_eb_18273_84_20032023.ScanId;v=1;d1=4782.4782.2	controllerType=0 controllerNumber=1 scan=4782	18.8239
03793:2	1	P.HPGHPGYIN[+0.984].F		N[+1]	496.732	2	992.457	992.458	0	-1.9	22	Non	432.85	302.13	302.13	4.82	1104	>sp|P02817|AMELX_BOVIN Amelogenin, X isoform OS=Bos taurus OX=9913 GN=AMELX PE=1 SV=2	1	hf1_eb_18273_84_20032023.ScanId;v=1;d1=5343.5343.2	controllerType=0 controllerNumber=1 scan=5343	19.9856
12374:3	1	P.HPGHPGYINF.S			380.186	3	1138.54	1138.54	0	-0.1	22	Non	271.77	271.77	271.77	3.27	1104	>sp|P02817|AMELX_BOVIN Amelogenin, X isoform OS=Bos taurus OX=9913 GN=AMELX PE=1 SV=2	1	hf1_eb_18273_84_20032023.ScanId;v=1;d1=12122.12122.3	controllerType=0 controllerNumber=1 scan=12122	33.4876
12391:2	1	P.HPGHPGYINF.S			569.775	2	1138.54	1138.54	0	-0.1	22	Non	284.61	284.61	284.61	5.11	1104	>sp|P02817|AMELX_BOVIN Amelogenin, X isoform OS=Bos taurus OX=9913 GN=AMELX PE=1 SV=2	1	hf1_eb_18273_84_20032023.ScanId;v=1;d1=12133.12133.2	controllerType=0 controllerNumber=1 scan=12133	33.5056
13376:3	1	P.HPGHPGYINF.S			380.186	3	1138.54	1138.54	0	-0.4	22	Non	327.54	327.54	327.54	4.79	1104	>sp|P02817|AMELX_BOVIN Amelogenin, X isoform OS=Bos taurus OX=9913 GN=AMELX PE=1 SV=2	1	hf1_eb_18273_84_20032023.ScanId;v=1;d1=12836.12836.3	controllerType=0 controllerNumber=1 scan=12836	34.7694
15075:2	1	P.HPGHPGYIN[+0.984]F.S		N[+1]	570.266	2	1139.53	1139.53	0	-1.3	22	Non	203.79	140.14	140.14	1.03	1104	>sp|P02817|AMELX_BOVIN Amelogenin, X isoform OS=Bos taurus OX=9913 GN=AMELX PE=1 SV=2	1	hf1_eb_18273_84_20032023.ScanId;v=1;d1=14062.14062.2	controllerType=0 controllerNumber=1 scan=14062	37.0136
14604:3	1	P.HPGHPGYIN[+0.984]F.S		N[+1]	380.513	3	1139.52	1139.53	0	-1.9	22	Non	250.9	250.9	250.9	3.97	1104	>sp|P02817|AMELX_BOVIN Amelogenin, X isoform OS=Bos taurus OX=9913 GN=AMELX PE=1 SV=2	1	hf1_eb_18273_84_20032023.ScanId;v=1;d1=13716.13716.3	controllerType=0 controllerNumber=1 scan=13716	36.3725
11853:3	1	P.HPGHPGYIN[+0.984]F.S		N[+1]	380.513	3	1139.53	1139.53	0	-1.1	22	Non	255.52	255.52	255.52	3.86	1104	>sp|P02817|AMELX_BOVIN Amelogenin, X isoform OS=Bos taurus OX=9913 GN=AMELX PE=1 SV=2	1	hf1_eb_18273_84_20032023.ScanId;v=1;d1=11737.11737.3	controllerType=0 controllerNumber=1 scan=11737	32.7797
14791:2	1	P.HPGHPGYIN[+0.984]F.S		N[+1]	570.265	2	1139.52	1139.53	0	-3.3	22	Non	263.4	249.57	249.57	3.96	1104	>sp|P02817|AMELX_BOVIN Amelogenin, X isoform OS=Bos taurus OX=9913 GN=AMELX PE=1 SV=2	1	hf1_eb_18273_84_20032023.ScanId;v=1;d1=13856.13856.2	controllerType=0 controllerNumber=1 scan=13856	36.6305
14050:3	1	P.HPGHPGYIN[+0.984]F.S		N[+1]	380.513	3	1139.53	1139.53	0	-1.2	22	Non	277.76	251.59	251.59	3.86	1104	>sp|P02817|AMELX_BOVIN Amelogenin, X isoform OS=Bos taurus OX=9913 GN=AMELX PE=1 SV=2	1	hf1_eb_18273_84_20032023.ScanId;v=1;d1=13328.13328.3	controllerType=0 controllerNumber=1 scan=13328	35.6693
12916:3	1	P.HPGHPGYIN[+0.984]F.S		N[+1]	380.514	3	1139.53	1139.53	0	-0.7	22	Non	285.32	285.32	285.32	4.68	1104	>sp|P02817|AMELX_BOVIN Amelogenin, X isoform OS=Bos taurus OX=9913 GN=AMELX PE=1 SV=2	1	hf1_eb_18273_84_20032023.ScanId;v=1;d1=12503.12503.3	controllerType=0 controllerNumber=1 scan=12503	34.1797
14306:3	1	P.HPGHPGYIN[+0.984]F.S		N[+1]	380.514	3	1139.53	1139.53	0	-0.8	22	Non	331.35	304.22	304.22	4.71	1104	>sp|P02817|AMELX_BOVIN Amelogenin, X isoform OS=Bos taurus OX=9913 GN=AMELX PE=1 SV=2	1	hf1_eb_18273_84_20032023.ScanId;v=1;d1=13515.13515.3	controllerType=0 controllerNumber=1 scan=13515	36.0134
13994:2	1	P.HPGHPGYIN[+0.984]F.S		N[+1]	570.267	2	1139.53	1139.53	0	-0.2	22	Non	404.42	331.42	331.42	5.18	1104	>sp|P02817|AMELX_BOVIN Amelogenin, X isoform OS=Bos taurus OX=9913 GN=AMELX PE=1 SV=2	1	hf1_eb_18273_84_20032023.ScanId;v=1;d1=13283.13283.2	controllerType=0 controllerNumber=1 scan=13283	35.5845
14523:2	1	P.HPGHPGYIN[+0.984]F.S		N[+1]	570.268	2	1139.53	1139.53	0	2	22	Non	463.7	427.39	427.39	5.75	1104	>sp|P02817|AMELX_BOVIN Amelogenin, X isoform OS=Bos taurus OX=9913 GN=AMELX PE=1 SV=2	1	hf1_eb_18273_84_20032023.ScanId;v=1;d1=13661.13661.2	controllerType=0 controllerNumber=1 scan=13661	36.2765
12911:2	1	P.HPGHPGYIN[+0.984]F.S		N[+1]	570.266	2	1139.53	1139.53	0	-0.9	22	Non	518.49	462.31	462.31	6.12	1104	>sp|P02817|AMELX_BOVIN Amelogenin, X isoform OS=Bos taurus OX=9913 GN=AMELX PE=1 SV=2	1	hf1_eb_18273_84_20032023.ScanId;v=1;d1=12500.12500.2	controllerType=0 controllerNumber=1 scan=12500	34.1753
14242:2	1	P.HPGHPGYIN[+0.984]F.S		N[+1]	570.267	2	1139.53	1139.53	0	-0.2	22	Non	613.64	586.79	586.79	8.53	1104	>sp|P02817|AMELX_BOVIN Amelogenin, X isoform OS=Bos taurus OX=9913 GN=AMELX PE=1 SV=2	1	hf1_eb_18273_84_20032023.ScanId;v=1;d1=13472.13472.2	controllerType=0 controllerNumber=1 scan=13472	35.9352
13132:2	1	P.HPGHP[+15.995]GYIN[+0.984]F.S		N[+1], P[+16]	578.266	2	1155.52	1155.52	0	1.9	22	Non	308.52	297.48	34.2	4.33	1104	>sp|P02817|AMELX_BOVIN Amelogenin, X isoform OS=Bos taurus OX=9913 GN=AMELX PE=1 SV=2	1	hf1_eb_18273_84_20032023.ScanId;v=1;d1=12661.12661.2	controllerType=0 controllerNumber=1 scan=12661	34.4562
14756:2	1	P.HPGHPGYINFS[+79.966].Y		S[+80]	653.273	2	1305.54	1305.54	0	-1.4	22	Non	454.4	440.01	321.15	6.16	1104	>sp|P02817|AMELX_BOVIN Amelogenin, X isoform OS=Bos taurus OX=9913 GN=AMELX PE=1 SV=2	1	hf1_eb_18273_84_20032023.ScanId;v=1;d1=13828.13828.2	controllerType=0 controllerNumber=1 scan=13828	36.5792
16144:2	1	P.HPGHPGYIN[+0.984]FS[+79.966].Y		N[+1], S[+80]	653.766	2	1306.52	1306.53	0	-0.9	22	Non	497.64	348.58	348.58	5.57	1104	>sp|P02817|AMELX_BOVIN Amelogenin, X isoform OS=Bos taurus OX=9913 GN=AMELX PE=1 SV=2	1	hf1_eb_18273_84_20032023.ScanId;v=1;d1=14828.14828.2	controllerType=0 controllerNumber=1 scan=14828	38.3859
21453:2	1	P.HPGHPGYIN[+0.984]FS[+79.966]Y.E		N[+1], S[+80]	735.297	2	1469.59	1469.59	0	-1.3	22	Non	239.09	214.89	214.89	3.07	1104	>sp|P02817|AMELX_BOVIN Amelogenin, X isoform OS=Bos taurus OX=9913 GN=AMELX PE=1 SV=2	1	hf1_eb_18273_84_20032023.ScanId;v=1;d1=18740.18740.2	controllerType=0 controllerNumber=1 scan=18740	45.4231
32803:3	1	P.HPGHPGYINFS[+79.966]YEVLTPL.K		S[+80]	707.666	3	2120.98	2120.98	0	-0.1	22	Non	165.89	165.89	108.07	2.88	1104	>sp|P02817|AMELX_BOVIN Amelogenin, X isoform OS=Bos taurus OX=9913 GN=AMELX PE=1 SV=2	1	hf1_eb_18273_84_20032023.ScanId;v=1;d1=26690.26690.3	controllerType=0 controllerNumber=1 scan=26690	59.5561
27278:3	1	P.HPGHPGYINFS[+79.966]YEVLTPLK.W		S[+80]	750.363	3	2249.07	2249.08	0	-2.2	22	NRagged	568.12	568.12	313.35	8.85	1104	>sp|P02817|AMELX_BOVIN Amelogenin, X isoform OS=Bos taurus OX=9913 GN=AMELX PE=1 SV=2	1	hf1_eb_18273_84_20032023.ScanId;v=1;d1=22835.22835.3	controllerType=0 controllerNumber=1 scan=22835	52.6937
28597:3	1	P.HPGHPGYIN[+0.984]FS[+79.966]YEVLTPLK.W		N[+1], S[+80]	750.692	3	2250.06	2250.06	0	-1.4	22	NRagged	108.96	108.96	36.06	2.24	1104	>sp|P02817|AMELX_BOVIN Amelogenin, X isoform OS=Bos taurus OX=9913 GN=AMELX PE=1 SV=2	1	hf1_eb_18273_84_20032023.ScanId;v=1;d1=23745.23745.3	controllerType=0 controllerNumber=1 scan=23745	54.2811
28308:3	1	P.HPGHPGYIN[+0.984]FS[+79.966]YEVLTPLK.W		N[+1], S[+80]	750.691	3	2250.06	2250.06	0	-1.7	22	NRagged	640.62	640.62	396.15	9.85	1104	>sp|P02817|AMELX_BOVIN Amelogenin, X isoform OS=Bos taurus OX=9913 GN=AMELX PE=1 SV=2	1	hf1_eb_18273_84_20032023.ScanId;v=1;d1=23546.23546.3	controllerType=0 controllerNumber=1 scan=23546	53.9288
05834:2	1	H.PGHPGYIN[+0.984].F		N[+1]	428.203	2	855.399	855.399	0	-0.7	23	Non	399.46	399.46	399.46	5.62	1104	>sp|P02817|AMELX_BOVIN Amelogenin, X isoform OS=Bos taurus OX=9913 GN=AMELX PE=1 SV=2	1	hf1_eb_18273_84_20032023.ScanId;v=1;d1=7072.7072.2	controllerType=0 controllerNumber=1 scan=7072	23.7249
04533:2	1	H.PGHP[+15.995]GYIN[+0.984].F		N[+1], P[+16]	436.2	2	871.393	871.394	0	-1.3	23	Non	196.55	186.91	33.46	1.78	1104	>sp|P02817|AMELX_BOVIN Amelogenin, X isoform OS=Bos taurus OX=9913 GN=AMELX PE=1 SV=2	1	hf1_eb_18273_84_20032023.ScanId;v=1;d1=5972.5972.2	controllerType=0 controllerNumber=1 scan=5972	21.392
16092:2	1	H.PGHPGYINF.S			501.245	2	1001.48	1001.48	0	-1.4	23	Non	327.31	283.16	283.16	4.54	1104	>sp|P02817|AMELX_BOVIN Amelogenin, X isoform OS=Bos taurus OX=9913 GN=AMELX PE=1 SV=2	1	hf1_eb_18273_84_20032023.ScanId;v=1;d1=14791.14791.2	controllerType=0 controllerNumber=1 scan=14791	38.3218
17371:2	1	H.PGHPGYINF.S			501.245	2	1001.48	1001.48	0	-2	23	Non	443.4	398.17	398.17	5.45	1104	>sp|P02817|AMELX_BOVIN Amelogenin, X isoform OS=Bos taurus OX=9913 GN=AMELX PE=1 SV=2	1	hf1_eb_18273_84_20032023.ScanId;v=1;d1=15722.15722.2	controllerType=0 controllerNumber=1 scan=15722	39.9492
18492:2	1	H.PGHPGYIN[+0.984]F.S		N[+1]	501.737	2	1002.47	1002.47	0	-0.9	23	Non	219.62	181.76	181.76	1.78	1104	>sp|P02817|AMELX_BOVIN Amelogenin, X isoform OS=Bos taurus OX=9913 GN=AMELX PE=1 SV=2	1	hf1_eb_18273_84_20032023.ScanId;v=1;d1=16570.16570.2	controllerType=0 controllerNumber=1 scan=16570	41.4836
16358:2	1	H.PGHP[+15.995]GYINF.S		P[+16]	509.243	2	1017.48	1017.48	0	-0.6	23	Non	255.17	238.04	12.81	3.07	1104	>sp|P02817|AMELX_BOVIN Amelogenin, X isoform OS=Bos taurus OX=9913 GN=AMELX PE=1 SV=2	1	hf1_eb_18273_84_20032023.ScanId;v=1;d1=14979.14979.2	controllerType=0 controllerNumber=1 scan=14979	38.6476
18687:2	1	H.PGHPGYIN[+0.984]F.S		N[+1]	501.737	2	1002.47	1002.47	0	-1.3	23	Non	442.3	348.4	348.4	4.39	1104	>sp|P02817|AMELX_BOVIN Amelogenin, X isoform OS=Bos taurus OX=9913 GN=AMELX PE=1 SV=2	1	hf1_eb_18273_84_20032023.ScanId;v=1;d1=16723.16723.2	controllerType=0 controllerNumber=1 scan=16723	41.7637
18151:2	1	H.PGHPGYIN[+0.984]F.S		N[+1]	501.737	2	1002.47	1002.47	0	-1.4	23	Non	460.22	353.34	353.34	4.72	1104	>sp|P02817|AMELX_BOVIN Amelogenin, X isoform OS=Bos taurus OX=9913 GN=AMELX PE=1 SV=2	1	hf1_eb_18273_84_20032023.ScanId;v=1;d1=16337.16337.2	controllerType=0 controllerNumber=1 scan=16337	41.0736
17503:2	1	H.PGHPGYIN[+0.984]F.S		N[+1]	501.736	2	1002.47	1002.47	0	-2.1	23	Non	475.24	403.54	403.54	5.39	1104	>sp|P02817|AMELX_BOVIN Amelogenin, X isoform OS=Bos taurus OX=9913 GN=AMELX PE=1 SV=2	1	hf1_eb_18273_84_20032023.ScanId;v=1;d1=15820.15820.2	controllerType=0 controllerNumber=1 scan=15820	40.1228
16508:2	1	H.PGHPGYIN[+0.984]F.S		N[+1]	501.737	2	1002.47	1002.47	0	-2	23	Non	475.37	409.58	409.58	5.45	1104	>sp|P02817|AMELX_BOVIN Amelogenin, X isoform OS=Bos taurus OX=9913 GN=AMELX PE=1 SV=2	1	hf1_eb_18273_84_20032023.ScanId;v=1;d1=15086.15086.2	controllerType=0 controllerNumber=1 scan=15086	38.8314
18435:2	1	H.PGHPGYIN[+0.984]F.S		N[+1]	501.737	2	1002.47	1002.47	0	-0.7	23	Non	510.47	477.15	477.15	5.63	1104	>sp|P02817|AMELX_BOVIN Amelogenin, X isoform OS=Bos taurus OX=9913 GN=AMELX PE=1 SV=2	1	hf1_eb_18273_84_20032023.ScanId;v=1;d1=16533.16533.2	controllerType=0 controllerNumber=1 scan=16533	41.4229
16846:2	1	H.PGHP[+15.995]GYIN[+0.984]F.S		N[+1], P[+16]	509.734	2	1018.46	1018.46	0	-1.4	23	Non	386.16	358.99	25.17	4.68	1104	>sp|P02817|AMELX_BOVIN Amelogenin, X isoform OS=Bos taurus OX=9913 GN=AMELX PE=1 SV=2	1	hf1_eb_18273_84_20032023.ScanId;v=1;d1=15336.15336.2	controllerType=0 controllerNumber=1 scan=15336	39.2664
16858:2	1	H.PGHP[+15.995]GYIN[+0.984]F.S		N[+1], P[+16]	509.734	2	1018.46	1018.46	0	-2.8	23	Non	435.38	394.2	54.6	5.36	1104	>sp|P02817|AMELX_BOVIN Amelogenin, X isoform OS=Bos taurus OX=9913 GN=AMELX PE=1 SV=2	1	hf1_eb_18273_84_20032023.ScanId;v=1;d1=15345.15345.2	controllerType=0 controllerNumber=1 scan=15345	39.2825
17996:2	1	H.PGHPGYINFS[+79.966].Y		S[+80]	584.744	2	1168.48	1168.48	0	-1.2	23	Non	414.08	380.79	354.16	5.74	1104	>sp|P02817|AMELX_BOVIN Amelogenin, X isoform OS=Bos taurus OX=9913 GN=AMELX PE=1 SV=2	1	hf1_eb_18273_84_20032023.ScanId;v=1;d1=16215.16215.2	controllerType=0 controllerNumber=1 scan=16215	40.8501
19375:2	1	H.PGHPGYIN[+0.984]FS[+79.966].Y		N[+1], S[+80]	585.236	2	1169.46	1169.47	0	-1.6	23	Non	403.32	287.14	287.14	4.73	1104	>sp|P02817|AMELX_BOVIN Amelogenin, X isoform OS=Bos taurus OX=9913 GN=AMELX PE=1 SV=2	1	hf1_eb_18273_84_20032023.ScanId;v=1;d1=17227.17227.2	controllerType=0 controllerNumber=1 scan=17227	42.6752
19646:2	1	H.PGHPGYIN[+0.984]FS[+79.966].Y		N[+1], S[+80]	585.235	2	1169.46	1169.47	0	-3.3	23	Non	497.28	368.45	368.45	6.28	1104	>sp|P02817|AMELX_BOVIN Amelogenin, X isoform OS=Bos taurus OX=9913 GN=AMELX PE=1 SV=2	1	hf1_eb_18273_84_20032023.ScanId;v=1;d1=17422.17422.2	controllerType=0 controllerNumber=1 scan=17422	43.0244
24873:2	1	H.PGHPGYIN[+0.984]FS[+79.966]Y.E		N[+1], S[+80]	666.767	2	1332.53	1332.53	0	-1.6	23	Non	250.14	186.18	186.18	2.68	1104	>sp|P02817|AMELX_BOVIN Amelogenin, X isoform OS=Bos taurus OX=9913 GN=AMELX PE=1 SV=2	1	hf1_eb_18273_84_20032023.ScanId;v=1;d1=21151.21151.2	controllerType=0 controllerNumber=1 scan=21151	49.6841
23358:2	1	H.PGHPGYIN[+0.984]FS[+79.966]YE.V		N[+1], S[+80]	731.289	2	1461.57	1461.57	0	-1	23	Non	216.29	216.29	216.29	3.08	1104	>sp|P02817|AMELX_BOVIN Amelogenin, X isoform OS=Bos taurus OX=9913 GN=AMELX PE=1 SV=2	1	hf1_eb_18273_84_20032023.ScanId;v=1;d1=20083.20083.2	controllerType=0 controllerNumber=1 scan=20083	47.7978
29626:2	1	H.PGHPGYIN[+0.984]FSYEVL.T		N[+1]	797.385	2	1593.76	1593.76	0	2.2	23	Non	214.64	214.64	214.64	2.96	1104	>sp|P02817|AMELX_BOVIN Amelogenin, X isoform OS=Bos taurus OX=9913 GN=AMELX PE=1 SV=2	1	hf1_eb_18273_84_20032023.ScanId;v=1;d1=24455.24455.2	controllerType=0 controllerNumber=1 scan=24455	55.5383
32586:2	1	H.PGHPGYIN[+0.984]FS[+79.966]YEVL.T		N[+1], S[+80]	837.366	2	1673.73	1673.72	0	0.4	23	Non	164.99	164.99	164.99	2.23	1104	>sp|P02817|AMELX_BOVIN Amelogenin, X isoform OS=Bos taurus OX=9913 GN=AMELX PE=1 SV=2	1	hf1_eb_18273_84_20032023.ScanId;v=1;d1=26543.26543.2	controllerType=0 controllerNumber=1 scan=26543	59.2923
34988:2	1	H.PGHPGYIN[+0.984]FSYEVLTPL.K		N[+1]	952.976	2	1904.94	1904.94	0	0.4	23	Non	95.14	95.14	95.14	2.2	1104	>sp|P02817|AMELX_BOVIN Amelogenin, X isoform OS=Bos taurus OX=9913 GN=AMELX PE=1 SV=2	1	hf1_eb_18273_84_20032023.ScanId;v=1;d1=28162.28162.2	controllerType=0 controllerNumber=1 scan=28162	62.1988
36172:2	1	H.PGHPGYINFS[+79.966]YEVLTPL.K		S[+80]	992.466	2	1983.92	1983.93	0	-0.5	23	Non	302.48	228.6	171.51	5.01	1104	>sp|P02817|AMELX_BOVIN Amelogenin, X isoform OS=Bos taurus OX=9913 GN=AMELX PE=1 SV=2	1	hf1_eb_18273_84_20032023.ScanId;v=1;d1=28972.28972.2	controllerType=0 controllerNumber=1 scan=28972	63.6418
29327:3	1	H.PGHPGYINFSYEVLTPLK.W			678.021	3	2032.05	2032.05	0	-3.2	23	NRagged	284.03	204.13	204.13	5.69	1104	>sp|P02817|AMELX_BOVIN Amelogenin, X isoform OS=Bos taurus OX=9913 GN=AMELX PE=1 SV=2	1	hf1_eb_18273_84_20032023.ScanId;v=1;d1=24246.24246.3	controllerType=0 controllerNumber=1 scan=24246	55.173
30341:2	1	H.PGHPGYINFS[+79.966]YEVLTPLK.W		S[+80]	1056.51	2	2112.02	2112.02	0	-1.7	23	NRagged	494.95	494.95	286.01	7.53	1104	>sp|P02817|AMELX_BOVIN Amelogenin, X isoform OS=Bos taurus OX=9913 GN=AMELX PE=1 SV=2	1	hf1_eb_18273_84_20032023.ScanId;v=1;d1=24990.24990.2	controllerType=0 controllerNumber=1 scan=24990	56.5064
30358:3	1	H.PGHPGYINFS[+79.966]YEVLTPLK.W		S[+80]	704.678	3	2112.02	2112.02	0	-0.4	23	NRagged	751.16	751.16	463.06	12.61	1104	>sp|P02817|AMELX_BOVIN Amelogenin, X isoform OS=Bos taurus OX=9913 GN=AMELX PE=1 SV=2	1	hf1_eb_18273_84_20032023.ScanId;v=1;d1=25000.25000.3	controllerType=0 controllerNumber=1 scan=25000	56.5238
30745:3	1	H.PGHPGYIN[+0.984]FS[+79.966]YEVLTPLK.W		N[+1], S[+80]	705.008	3	2113.01	2113	0	2.2	23	NRagged	90.06	90.06	7.83	1.36	1104	>sp|P02817|AMELX_BOVIN Amelogenin, X isoform OS=Bos taurus OX=9913 GN=AMELX PE=1 SV=2	1	hf1_eb_18273_84_20032023.ScanId;v=1;d1=25261.25261.2	controllerType=0 controllerNumber=1 scan=25261	56.9827
31658:3	1	H.PGHPGYIN[+0.984]FS[+79.966]YEVLTPLK.W		N[+1], S[+80]	705.006	3	2113	2113	0	-0.9	23	NRagged	136.72	136.72	77.21	3.11	1104	>sp|P02817|AMELX_BOVIN Amelogenin, X isoform OS=Bos taurus OX=9913 GN=AMELX PE=1 SV=2	1	hf1_eb_18273_84_20032023.ScanId;v=1;d1=25897.25897.2	controllerType=0 controllerNumber=1 scan=25897	58.1154
20439:4	1	H.PGHP[+31.990]GYINF[+31.990]SYEVLTPLK.W		F[+32], P[+32]	524.762	4	2096.03	2096.03	0	-3.4	23	NRagged	165.67	165.67	0.91	2.6	1104	>sp|P02817|AMELX_BOVIN Amelogenin, X isoform OS=Bos taurus OX=9913 GN=AMELX PE=1 SV=2	1	hf1_eb_18273_84_20032023.ScanId;v=1;d1=18021.18021.4	controllerType=0 controllerNumber=1 scan=18021	44.1424
20162:4	1	H.P[+31.990]GHPGY[+31.990]INFSYEVLTPLK.W		P[+32], Y[+32]	524.761	4	2096.02	2096.03	0	-5.6	23	NRagged	181.34	181.34	5.08	2.25	1104	>sp|P02817|AMELX_BOVIN Amelogenin, X isoform OS=Bos taurus OX=9913 GN=AMELX PE=1 SV=2	1	hf1_eb_18273_84_20032023.ScanId;v=1;d1=17820.17820.2	controllerType=0 controllerNumber=1 scan=17820	43.7776
18672:4	1	H.PGHPGY[+31.990]INFSY[+15.995]EVLTPLK.W		Y[+16][+32]	520.764	4	2080.03	2080.04	0	-1.8	23	NRagged	199.66	199.66	0	3.13	1104	>sp|P02817|AMELX_BOVIN Amelogenin, X isoform OS=Bos taurus OX=9913 GN=AMELX PE=1 SV=2	1	hf1_eb_18273_84_20032023.ScanId;v=1;d1=16710.16710.2	controllerType=0 controllerNumber=1 scan=16710	41.7387
31387:3	1	H.PGHPGYIN[+0.984]FS[+79.966]YEVLTPLK.W		N[+1], S[+80]	705.006	3	2113	2113	0	-0.2	23	NRagged	557.98	557.98	358.79	7.94	1104	>sp|P02817|AMELX_BOVIN Amelogenin, X isoform OS=Bos taurus OX=9913 GN=AMELX PE=1 SV=2	1	hf1_eb_18273_84_20032023.ScanId;v=1;d1=25702.25702.3	controllerType=0 controllerNumber=1 scan=25702	57.7639
31392:2	1	H.PGHPGYIN[+0.984]FS[+79.966]YEVLTPLK.W		N[+1], S[+80]	1057.01	2	2113.01	2113	0	0.6	23	NRagged	803.59	803.59	473.08	13.59	1104	>sp|P02817|AMELX_BOVIN Amelogenin, X isoform OS=Bos taurus OX=9913 GN=AMELX PE=1 SV=2	1	hf1_eb_18273_84_20032023.ScanId;v=1;d1=25705.25705.2	controllerType=0 controllerNumber=1 scan=25705	57.7684
30769:3	1	H.PGHP[+15.995]GYIN[+0.984]FS[+79.966]YEVLTPLK.W		N[+1], P[+16], S[+80]	710.338	3	2129	2129	0	-0.4	23	NRagged	258.12	258.12	0	5.69	1104	>sp|P02817|AMELX_BOVIN Amelogenin, X isoform OS=Bos taurus OX=9913 GN=AMELX PE=1 SV=2	1	hf1_eb_18273_84_20032023.ScanId;v=1;d1=25280.25280.3	controllerType=0 controllerNumber=1 scan=25280	57.0158
05433:2	1	P.GHPGYIN[+0.984].F		N[+1]	379.676	2	758.346	758.347	0	-1.4	24	Non	279.36	279.36	279.36	3.69	1104	>sp|P02817|AMELX_BOVIN Amelogenin, X isoform OS=Bos taurus OX=9913 GN=AMELX PE=1 SV=2	1	hf1_eb_18273_84_20032023.ScanId;v=1;d1=6731.6731.2	controllerType=0 controllerNumber=1 scan=6731	23.0028
05258:2	1	P.GHPGYIN[+0.984].F		N[+1]	379.677	2	758.346	758.347	0	-0.8	24	Non	331.87	331.87	331.87	5.02	1104	>sp|P02817|AMELX_BOVIN Amelogenin, X isoform OS=Bos taurus OX=9913 GN=AMELX PE=1 SV=2	1	hf1_eb_18273_84_20032023.ScanId;v=1;d1=6577.6577.2	controllerType=0 controllerNumber=1 scan=6577	22.6567
05070:2	1	P.GHPGYIN[+0.984].F		N[+1]	379.677	2	758.346	758.347	0	-1	24	Non	333.34	314.57	314.57	4.21	1104	>sp|P02817|AMELX_BOVIN Amelogenin, X isoform OS=Bos taurus OX=9913 GN=AMELX PE=1 SV=2	1	hf1_eb_18273_84_20032023.ScanId;v=1;d1=6418.6418.2	controllerType=0 controllerNumber=1 scan=6418	22.3145
14073:2	1	P.GHPGYINF.S			452.719	2	904.431	904.431	0	-0.7	24	Non	274.28	274.28	274.28	3.69	1104	>sp|P02817|AMELX_BOVIN Amelogenin, X isoform OS=Bos taurus OX=9913 GN=AMELX PE=1 SV=2	1	hf1_eb_18273_84_20032023.ScanId;v=1;d1=13343.13343.2	controllerType=0 controllerNumber=1 scan=13343	35.6962
16810:2	1	P.GHPGYINF.S			452.718	2	904.429	904.431	0	-2.5	24	Non	352.07	346.56	346.56	4.52	1104	>sp|P02817|AMELX_BOVIN Amelogenin, X isoform OS=Bos taurus OX=9913 GN=AMELX PE=1 SV=2	1	hf1_eb_18273_84_20032023.ScanId;v=1;d1=15312.15312.2	controllerType=0 controllerNumber=1 scan=15312	39.2271
18935:2	1	P.GHPGYIN[+0.984]F.S		N[+1]	453.211	2	905.414	905.415	0	-1.4	24	Non	272.02	266.32	266.32	3.69	1104	>sp|P02817|AMELX_BOVIN Amelogenin, X isoform OS=Bos taurus OX=9913 GN=AMELX PE=1 SV=2	1	hf1_eb_18273_84_20032023.ScanId;v=1;d1=16907.16907.2	controllerType=0 controllerNumber=1 scan=16907	42.0879
20265:2	1	P.GHPGYIN[+0.984]F.S		N[+1]	453.212	2	905.416	905.415	0	0.5	24	Non	285.18	274.33	274.33	4.03	1104	>sp|P02817|AMELX_BOVIN Amelogenin, X isoform OS=Bos taurus OX=9913 GN=AMELX PE=1 SV=2	1	hf1_eb_18273_84_20032023.ScanId;v=1;d1=17896.17896.2	controllerType=0 controllerNumber=1 scan=17896	43.9136
18667:2	1	P.GHPGYIN[+0.984]F.S		N[+1]	453.211	2	905.414	905.415	0	-1.5	24	Non	300.37	224.37	224.37	3.41	1104	>sp|P02817|AMELX_BOVIN Amelogenin, X isoform OS=Bos taurus OX=9913 GN=AMELX PE=1 SV=2	1	hf1_eb_18273_84_20032023.ScanId;v=1;d1=16707.16707.2	controllerType=0 controllerNumber=1 scan=16707	41.735
18343:2	1	P.GHPGYIN[+0.984]F.S		N[+1]	453.211	2	905.414	905.415	0	-1.4	24	Non	301.33	299.47	299.47	4.18	1104	>sp|P02817|AMELX_BOVIN Amelogenin, X isoform OS=Bos taurus OX=9913 GN=AMELX PE=1 SV=2	1	hf1_eb_18273_84_20032023.ScanId;v=1;d1=16469.16469.2	controllerType=0 controllerNumber=1 scan=16469	41.3102
18074:2	1	P.GHPGYIN[+0.984]F.S		N[+1]	453.21	2	905.413	905.415	0	-2.1	24	Non	303.06	303.06	303.06	4.3	1104	>sp|P02817|AMELX_BOVIN Amelogenin, X isoform OS=Bos taurus OX=9913 GN=AMELX PE=1 SV=2	1	hf1_eb_18273_84_20032023.ScanId;v=1;d1=16275.16275.2	controllerType=0 controllerNumber=1 scan=16275	40.9667
16038:2	1	P.GHP[+15.995]GYINF.S		P[+16]	460.716	2	920.425	920.426	0	-1.5	24	Non	309.34	309.34	31.58	3.97	1104	>sp|P02817|AMELX_BOVIN Amelogenin, X isoform OS=Bos taurus OX=9913 GN=AMELX PE=1 SV=2	1	hf1_eb_18273_84_20032023.ScanId;v=1;d1=14751.14751.2	controllerType=0 controllerNumber=1 scan=14751	38.2475
16452:2	1	P.GHPGYIN[+0.984]F.S		N[+1]	453.21	2	905.413	905.415	0	-2	24	Non	333.62	326.2	326.2	4.41	1104	>sp|P02817|AMELX_BOVIN Amelogenin, X isoform OS=Bos taurus OX=9913 GN=AMELX PE=1 SV=2	1	hf1_eb_18273_84_20032023.ScanId;v=1;d1=15044.15044.2	controllerType=0 controllerNumber=1 scan=15044	38.7571
17839:2	1	P.GHPGYIN[+0.984]F.S		N[+1]	453.211	2	905.414	905.415	0	-1.6	24	Non	334.82	332.49	332.49	4.52	1104	>sp|P02817|AMELX_BOVIN Amelogenin, X isoform OS=Bos taurus OX=9913 GN=AMELX PE=1 SV=2	1	hf1_eb_18273_84_20032023.ScanId;v=1;d1=16092.16092.2	controllerType=0 controllerNumber=1 scan=16092	40.6284
17192:2	1	P.GHPGYIN[+0.984]F.S		N[+1]	453.211	2	905.414	905.415	0	-1.1	24	Non	341.41	307.39	307.39	4.54	1104	>sp|P02817|AMELX_BOVIN Amelogenin, X isoform OS=Bos taurus OX=9913 GN=AMELX PE=1 SV=2	1	hf1_eb_18273_84_20032023.ScanId;v=1;d1=15589.15589.2	controllerType=0 controllerNumber=1 scan=15589	39.7113
17608:2	1	P.GHPGYIN[+0.984]F.S		N[+1]	453.21	2	905.414	905.415	0	-1.8	24	Non	382.41	380.46	380.46	5.24	1104	>sp|P02817|AMELX_BOVIN Amelogenin, X isoform OS=Bos taurus OX=9913 GN=AMELX PE=1 SV=2	1	hf1_eb_18273_84_20032023.ScanId;v=1;d1=15905.15905.2	controllerType=0 controllerNumber=1 scan=15905	40.2835
16156:2	1	P.GHPGYIN[+0.984]F.S		N[+1]	453.211	2	905.414	905.415	0	-1.3	24	Non	408.46	385.1	385.1	5.64	1104	>sp|P02817|AMELX_BOVIN Amelogenin, X isoform OS=Bos taurus OX=9913 GN=AMELX PE=1 SV=2	1	hf1_eb_18273_84_20032023.ScanId;v=1;d1=14835.14835.2	controllerType=0 controllerNumber=1 scan=14835	38.3982
17761:1	1	P.GHPGYIN[+0.984]F.S		N[+1]	905.414	1	905.414	905.415	0	-1.8	24	Non	437.98	390.94	390.94	5.57	1104	>sp|P02817|AMELX_BOVIN Amelogenin, X isoform OS=Bos taurus OX=9913 GN=AMELX PE=1 SV=2	1	hf1_eb_18273_84_20032023.ScanId;v=1;d1=16031.16031.3	controllerType=0 controllerNumber=1 scan=16031	40.5111
16748:2	1	P.GHP[+15.995]GYIN[+0.984]F.S		N[+1], P[+16]	461.208	2	921.409	921.41	0	-1.8	24	Non	187.93	187.93	24.86	2.24	1104	>sp|P02817|AMELX_BOVIN Amelogenin, X isoform OS=Bos taurus OX=9913 GN=AMELX PE=1 SV=2	1	hf1_eb_18273_84_20032023.ScanId;v=1;d1=15261.15261.2	controllerType=0 controllerNumber=1 scan=15261	39.1376
16543:2	1	P.GHPGYIN[+0.984]FS.Y		N[+1]	496.726	2	992.444	992.447	0	-2.7	24	Non	294.14	186.22	186.22	2.84	1104	>sp|P02817|AMELX_BOVIN Amelogenin, X isoform OS=Bos taurus OX=9913 GN=AMELX PE=1 SV=2	1	hf1_eb_18273_84_20032023.ScanId;v=1;d1=15110.15110.2	controllerType=0 controllerNumber=1 scan=15110	38.8746
17827:2	1	P.GHPGYINFS[+79.966].Y		S[+80]	536.218	2	1071.43	1071.43	0	-1.4	24	Non	398.45	383.12	376.64	5.62	1104	>sp|P02817|AMELX_BOVIN Amelogenin, X isoform OS=Bos taurus OX=9913 GN=AMELX PE=1 SV=2	1	hf1_eb_18273_84_20032023.ScanId;v=1;d1=16082.16082.2	controllerType=0 controllerNumber=1 scan=16082	40.6057
19335:1	1	P.GHPGYIN[+0.984]FS[+79.966].Y		N[+1], S[+80]	1072.41	1	1072.41	1072.41	0	-3.7	24	Non	399.45	271.2	271.2	4.6	1104	>sp|P02817|AMELX_BOVIN Amelogenin, X isoform OS=Bos taurus OX=9913 GN=AMELX PE=1 SV=2	1	hf1_eb_18273_84_20032023.ScanId;v=1;d1=17199.17199.2	controllerType=0 controllerNumber=1 scan=17199	42.6256
19327:2	1	P.GHPGYIN[+0.984]FS[+79.966].Y		N[+1], S[+80]	536.71	2	1072.41	1072.41	0	-1	24	Non	404.84	293.68	293.68	5	1104	>sp|P02817|AMELX_BOVIN Amelogenin, X isoform OS=Bos taurus OX=9913 GN=AMELX PE=1 SV=2	1	hf1_eb_18273_84_20032023.ScanId;v=1;d1=17193.17193.2	controllerType=0 controllerNumber=1 scan=17193	42.6142
23675:2	1	P.GHPGYINFS[+79.966]Y.E		S[+80]	617.75	2	1234.49	1234.49	0	-0.6	24	Non	181.1	170.23	170.23	2.14	1104	>sp|P02817|AMELX_BOVIN Amelogenin, X isoform OS=Bos taurus OX=9913 GN=AMELX PE=1 SV=2	1	hf1_eb_18273_84_20032023.ScanId;v=1;d1=20305.20305.2	controllerType=0 controllerNumber=1 scan=20305	48.1898
21085:2	1	P.GHPGYIN[+0.984]FSY.E		N[+1]	578.259	2	1155.51	1155.51	0	-0.6	24	Non	396.22	396.22	396.22	5.63	1104	>sp|P02817|AMELX_BOVIN Amelogenin, X isoform OS=Bos taurus OX=9913 GN=AMELX PE=1 SV=2	1	hf1_eb_18273_84_20032023.ScanId;v=1;d1=18482.18482.2	controllerType=0 controllerNumber=1 scan=18482	44.9597
23478:2	1	P.GHPGYIN[+0.984]FS[+79.966]YE.V		N[+1], S[+80]	682.763	2	1364.52	1364.52	0	-0.9	24	Non	214.28	206.35	188.97	2.79	1104	>sp|P02817|AMELX_BOVIN Amelogenin, X isoform OS=Bos taurus OX=9913 GN=AMELX PE=1 SV=2	1	hf1_eb_18273_84_20032023.ScanId;v=1;d1=20164.20164.2	controllerType=0 controllerNumber=1 scan=20164	47.9444
23336:2	1	P.GHPGYIN[+0.984]FS[+79.966]YE.V		N[+1], S[+80]	682.762	2	1364.52	1364.52	0	-1.5	24	Non	323.26	283.78	283.78	4.6	1104	>sp|P02817|AMELX_BOVIN Amelogenin, X isoform OS=Bos taurus OX=9913 GN=AMELX PE=1 SV=2	1	hf1_eb_18273_84_20032023.ScanId;v=1;d1=20068.20068.2	controllerType=0 controllerNumber=1 scan=20068	47.7729
27770:2	1	P.GHPGYIN[+0.984]FS[+79.966]YEV.L		N[+1], S[+80]	732.297	2	1463.59	1463.59	0	-1.1	24	Non	168.14	168.14	168.14	2.47	1104	>sp|P02817|AMELX_BOVIN Amelogenin, X isoform OS=Bos taurus OX=9913 GN=AMELX PE=1 SV=2	1	hf1_eb_18273_84_20032023.ScanId;v=1;d1=23172.23172.2	controllerType=0 controllerNumber=1 scan=23172	53.2805
31503:2	1	P.GHPGYINFS[+79.966]YEVL.T		S[+80]	788.348	2	1575.69	1575.69	0	0.1	24	Non	223.92	181.1	177.2	2.63	1104	>sp|P02817|AMELX_BOVIN Amelogenin, X isoform OS=Bos taurus OX=9913 GN=AMELX PE=1 SV=2	1	hf1_eb_18273_84_20032023.ScanId;v=1;d1=25782.25782.2	controllerType=0 controllerNumber=1 scan=25782	57.9061
29033:2	1	P.GHPGYIN[+0.984]FSYEVL.T		N[+1]	748.854	2	1496.7	1496.71	0	-3.5	24	Non	253.74	222.52	222.52	3.02	1104	>sp|P02817|AMELX_BOVIN Amelogenin, X isoform OS=Bos taurus OX=9913 GN=AMELX PE=1 SV=2	1	hf1_eb_18273_84_20032023.ScanId;v=1;d1=24051.24051.2	controllerType=0 controllerNumber=1 scan=24051	54.8267
29453:2	1	P.GHPGYIN[+0.984]FSYEVL.T		N[+1]	748.856	2	1496.71	1496.71	0	-0.2	24	Non	337.5	306.26	306.26	4.91	1104	>sp|P02817|AMELX_BOVIN Amelogenin, X isoform OS=Bos taurus OX=9913 GN=AMELX PE=1 SV=2	1	hf1_eb_18273_84_20032023.ScanId;v=1;d1=24334.24334.2	controllerType=0 controllerNumber=1 scan=24334	55.3227
32603:2	1	P.GHPGYIN[+0.984]FS[+79.966]YEVL.T		N[+1], S[+80]	788.839	2	1576.67	1576.67	0	-0.4	24	Non	194.34	194.34	176.09	2.91	1104	>sp|P02817|AMELX_BOVIN Amelogenin, X isoform OS=Bos taurus OX=9913 GN=AMELX PE=1 SV=2	1	hf1_eb_18273_84_20032023.ScanId;v=1;d1=26555.26555.2	controllerType=0 controllerNumber=1 scan=26555	59.316
32394:2	1	P.GHPGYIN[+0.984]FS[+79.966]YEVLTP.L		N[+1], S[+80]	887.891	2	1774.77	1774.77	0	0.9	24	Non	209.23	195.56	159.97	2.62	1104	>sp|P02817|AMELX_BOVIN Amelogenin, X isoform OS=Bos taurus OX=9913 GN=AMELX PE=1 SV=2	1	hf1_eb_18273_84_20032023.ScanId;v=1;d1=26410.26410.2	controllerType=0 controllerNumber=1 scan=26410	59.053
33802:2	1	P.GHPGYINFSYEVLTPL.K			903.955	2	1806.9	1806.91	0	-1.6	24	Non	154.27	132.04	132.04	1.5	1104	>sp|P02817|AMELX_BOVIN Amelogenin, X isoform OS=Bos taurus OX=9913 GN=AMELX PE=1 SV=2	1	hf1_eb_18273_84_20032023.ScanId;v=1;d1=27367.27367.2	controllerType=0 controllerNumber=1 scan=27367	60.7722
34774:2	1	P.GHPGYIN[+0.984]FSYEVLTPL.K		N[+1]	904.451	2	1807.89	1807.89	0	2	24	Non	153.99	139.83	139.83	2.19	1104	>sp|P02817|AMELX_BOVIN Amelogenin, X isoform OS=Bos taurus OX=9913 GN=AMELX PE=1 SV=2	1	hf1_eb_18273_84_20032023.ScanId;v=1;d1=28018.28018.2	controllerType=0 controllerNumber=1 scan=28018	61.9396
34085:2	1	P.GHPGYIN[+0.984]FSYEVLTPL.K		N[+1]	904.451	2	1807.89	1807.89	0	2.5	24	Non	232.97	231.29	231.29	2.44	1104	>sp|P02817|AMELX_BOVIN Amelogenin, X isoform OS=Bos taurus OX=9913 GN=AMELX PE=1 SV=2	1	hf1_eb_18273_84_20032023.ScanId;v=1;d1=27557.27557.2	controllerType=0 controllerNumber=1 scan=27557	61.1181
36199:2	1	P.GHPGYINFS[+79.966]YEVLTPL.K		S[+80]	943.939	2	1886.87	1886.87	0	-0.7	24	Non	359.54	320.28	217.6	5.32	1104	>sp|P02817|AMELX_BOVIN Amelogenin, X isoform OS=Bos taurus OX=9913 GN=AMELX PE=1 SV=2	1	hf1_eb_18273_84_20032023.ScanId;v=1;d1=28992.28992.2	controllerType=0 controllerNumber=1 scan=28992	63.6775
24126:3	1	P.GHPGYINFSYEVLTPLK.W			645.672	3	1935	1935	0	0.2	24	NRagged	233.99	233.99	233.99	4.46	1104	>sp|P02817|AMELX_BOVIN Amelogenin, X isoform OS=Bos taurus OX=9913 GN=AMELX PE=1 SV=2	1	hf1_eb_18273_84_20032023.ScanId;v=1;d1=20624.20624.3	controllerType=0 controllerNumber=1 scan=20624	48.7535
30704:2	1	P.GHPGYINFS[+79.966]YEVLTPLK.W		S[+80]	1007.99	2	2014.96	2014.97	0	-1.9	24	NRagged	118.69	118.69	57.47	2.91	1104	>sp|P02817|AMELX_BOVIN Amelogenin, X isoform OS=Bos taurus OX=9913 GN=AMELX PE=1 SV=2	1	hf1_eb_18273_84_20032023.ScanId;v=1;d1=25233.25233.2	controllerType=0 controllerNumber=1 scan=25233	56.9322
32398:3	1	P.GHPGYIN[+0.984]FSYEVLTPLK.W		N[+1]	645.999	3	1935.98	1935.99	0	-1.7	24	NRagged	120.63	120.63	120.63	2.24	1104	>sp|P02817|AMELX_BOVIN Amelogenin, X isoform OS=Bos taurus OX=9913 GN=AMELX PE=1 SV=2	1	hf1_eb_18273_84_20032023.ScanId;v=1;d1=26412.26412.3	controllerType=0 controllerNumber=1 scan=26412	59.0559
28005:3	1	P.GHPGYIN[+0.984]FSYEVLTPLK.W		N[+1]	646.006	3	1936	1935.99	0	8.8	24	NRagged	350.5	350.5	350.5	4.85	1104	>sp|P02817|AMELX_BOVIN Amelogenin, X isoform OS=Bos taurus OX=9913 GN=AMELX PE=1 SV=2	1	hf1_eb_18273_84_20032023.ScanId;v=1;d1=23334.23334.3	controllerType=0 controllerNumber=1 scan=23334	53.5551
29174:3	1	P.GHPGYIN[+0.984]FSYEVLTPLK.W		N[+1]	645.999	3	1935.98	1935.99	0	-2.1	24	NRagged	471.67	437.14	437.14	7.25	1104	>sp|P02817|AMELX_BOVIN Amelogenin, X isoform OS=Bos taurus OX=9913 GN=AMELX PE=1 SV=2	1	hf1_eb_18273_84_20032023.ScanId;v=1;d1=24147.24147.3	controllerType=0 controllerNumber=1 scan=24147	54.9966
28281:3	1	P.GHPGYIN[+0.984]FSYEVLTPLK.W		N[+1]	645.999	3	1935.98	1935.99	0	-1.3	24	NRagged	490.77	473.58	473.58	7.42	1104	>sp|P02817|AMELX_BOVIN Amelogenin, X isoform OS=Bos taurus OX=9913 GN=AMELX PE=1 SV=2	1	hf1_eb_18273_84_20032023.ScanId;v=1;d1=23528.23528.3	controllerType=0 controllerNumber=1 scan=23528	53.8961
30599:3	1	P.GHPGYINFS[+79.966]YEVLTPLK.W		S[+80]	672.327	3	2014.97	2014.97	0	-0.6	24	NRagged	493.82	493.82	269.18	7.42	1104	>sp|P02817|AMELX_BOVIN Amelogenin, X isoform OS=Bos taurus OX=9913 GN=AMELX PE=1 SV=2	1	hf1_eb_18273_84_20032023.ScanId;v=1;d1=25166.25166.3	controllerType=0 controllerNumber=1 scan=25166	56.8147
30310:3	1	P.GHPGYINFS[+79.966]YEVLTPLK.W		S[+80]	672.327	3	2014.97	2014.97	0	-0.6	24	NRagged	598.99	598.99	340.33	8.61	1104	>sp|P02817|AMELX_BOVIN Amelogenin, X isoform OS=Bos taurus OX=9913 GN=AMELX PE=1 SV=2	1	hf1_eb_18273_84_20032023.ScanId;v=1;d1=24968.24968.3	controllerType=0 controllerNumber=1 scan=24968	56.4678
30308:3	1	P.GHPGYINFS[+79.966]YEVLTPLK.W		S[+80]	672.327	3	2014.97	2014.97	0	-0.6	24	NRagged	670	670	411.81	10.61	1104	>sp|P02817|AMELX_BOVIN Amelogenin, X isoform OS=Bos taurus OX=9913 GN=AMELX PE=1 SV=2	1	hf1_eb_18273_84_20032023.ScanId;v=1;d1=24967.24967.4	controllerType=0 controllerNumber=1 scan=24967	56.4663
30326:2	1	P.GHPGYINFS[+79.966]YEVLTPLK.W		S[+80]	1007.99	2	2014.97	2014.97	0	-0.8	24	NRagged	767.05	767.05	453.55	12.93	1104	>sp|P02817|AMELX_BOVIN Amelogenin, X isoform OS=Bos taurus OX=9913 GN=AMELX PE=1 SV=2	1	hf1_eb_18273_84_20032023.ScanId;v=1;d1=24978.24978.2	controllerType=0 controllerNumber=1 scan=24978	56.4855
31945:2	1	P.GHPGYIN[+0.984]FS[+79.966]YEVLTPLK.W		N[+1], S[+80]	1008.48	2	2015.95	2015.95	0	0.7	24	NRagged	78.74	78.74	54.7	2.28	1104	>sp|P02817|AMELX_BOVIN Amelogenin, X isoform OS=Bos taurus OX=9913 GN=AMELX PE=1 SV=2	1	hf1_eb_18273_84_20032023.ScanId;v=1;d1=26102.26102.2	controllerType=0 controllerNumber=1 scan=26102	58.493
32309:2	1	P.GHPGYIN[+0.984]FS[+79.966]YEVLTPLK.W		N[+1], S[+80]	1008.48	2	2015.95	2015.95	0	1.4	24	NRagged	194.39	194.39	131.99	4.04	1104	>sp|P02817|AMELX_BOVIN Amelogenin, X isoform OS=Bos taurus OX=9913 GN=AMELX PE=1 SV=2	1	hf1_eb_18273_84_20032023.ScanId;v=1;d1=26344.26344.2	controllerType=0 controllerNumber=1 scan=26344	58.9318
32326:3	1	P.GHPGYIN[+0.984]FS[+79.966]YEVLTPLK.W		N[+1], S[+80]	672.655	3	2015.95	2015.95	0	-0.2	24	NRagged	284.11	284.11	132.35	6.19	1104	>sp|P02817|AMELX_BOVIN Amelogenin, X isoform OS=Bos taurus OX=9913 GN=AMELX PE=1 SV=2	1	hf1_eb_18273_84_20032023.ScanId;v=1;d1=26357.26357.3	controllerType=0 controllerNumber=1 scan=26357	58.9568
31069:2	1	P.GHPGYIN[+0.984]FS[+79.966]YEVLTPLK.W		N[+1], S[+80]	1008.48	2	2015.95	2015.95	0	-0.5	24	NRagged	299.81	299.81	141.12	6.51	1104	>sp|P02817|AMELX_BOVIN Amelogenin, X isoform OS=Bos taurus OX=9913 GN=AMELX PE=1 SV=2	1	hf1_eb_18273_84_20032023.ScanId;v=1;d1=25482.25482.2	controllerType=0 controllerNumber=1 scan=25482	57.3709
31083:3	1	P.GHPGYIN[+0.984]FS[+79.966]YEVLTPLK.W		N[+1], S[+80]	672.654	3	2015.95	2015.95	0	-1.9	24	NRagged	331.66	331.66	140.12	6.15	1104	>sp|P02817|AMELX_BOVIN Amelogenin, X isoform OS=Bos taurus OX=9913 GN=AMELX PE=1 SV=2	1	hf1_eb_18273_84_20032023.ScanId;v=1;d1=25493.25493.3	controllerType=0 controllerNumber=1 scan=25493	57.3901
31642:3	1	P.GHPGYIN[+0.984]FS[+79.966]YEVLTPLK.W		N[+1], S[+80]	672.655	3	2015.95	2015.95	0	-0.7	24	NRagged	526.78	526.78	327.19	7.94	1104	>sp|P02817|AMELX_BOVIN Amelogenin, X isoform OS=Bos taurus OX=9913 GN=AMELX PE=1 SV=2	1	hf1_eb_18273_84_20032023.ScanId;v=1;d1=25885.25885.3	controllerType=0 controllerNumber=1 scan=25885	58.0946
31368:3	1	P.GHPGYIN[+0.984]FS[+79.966]YEVLTPLK.W		N[+1], S[+80]	672.655	3	2015.95	2015.95	0	-1	24	NRagged	637.64	637.64	393.19	9.61	1104	>sp|P02817|AMELX_BOVIN Amelogenin, X isoform OS=Bos taurus OX=9913 GN=AMELX PE=1 SV=2	1	hf1_eb_18273_84_20032023.ScanId;v=1;d1=25690.25690.3	controllerType=0 controllerNumber=1 scan=25690	57.7431
31621:2	1	P.GHPGYIN[+0.984]FS[+79.966]YEVLTPLK.W		N[+1], S[+80]	1008.48	2	2015.95	2015.95	0	1.6	24	NRagged	695.03	695.03	412.65	10.59	1104	>sp|P02817|AMELX_BOVIN Amelogenin, X isoform OS=Bos taurus OX=9913 GN=AMELX PE=1 SV=2	1	hf1_eb_18273_84_20032023.ScanId;v=1;d1=25870.25870.2	controllerType=0 controllerNumber=1 scan=25870	58.0667
31349:2	1	P.GHPGYIN[+0.984]FS[+79.966]YEVLTPLK.W		N[+1], S[+80]	1008.48	2	2015.95	2015.95	0	0.1	24	NRagged	822.33	822.33	492.6	13.93	1104	>sp|P02817|AMELX_BOVIN Amelogenin, X isoform OS=Bos taurus OX=9913 GN=AMELX PE=1 SV=2	1	hf1_eb_18273_84_20032023.ScanId;v=1;d1=25677.25677.2	controllerType=0 controllerNumber=1 scan=25677	57.7214
01207:1	1	G.HPGY.I			473.213	1	473.213	473.214	0	-2.7	25	Non	224.75	216.1	216.1	1.31	1104	>sp|P02817|AMELX_BOVIN Amelogenin, X isoform OS=Bos taurus OX=9913 GN=AMELX PE=1 SV=2	1	hf1_eb_18273_84_20032023.ScanId;v=1;d1=3321.3321.2	controllerType=0 controllerNumber=1 scan=3321	16.115
20505:2	1	G.HPGYINF.S			424.208	2	847.409	847.41	0	-0.5	25	Non	173.02	171.61	171.61	1.78	1104	>sp|P02817|AMELX_BOVIN Amelogenin, X isoform OS=Bos taurus OX=9913 GN=AMELX PE=1 SV=2	1	hf1_eb_18273_84_20032023.ScanId;v=1;d1=18071.18071.2	controllerType=0 controllerNumber=1 scan=18071	44.2318
15920:2	1	G.HPGYINF.S			424.208	2	847.408	847.41	0	-1.9	25	Non	219.92	219.92	219.92	2.48	1104	>sp|P02817|AMELX_BOVIN Amelogenin, X isoform OS=Bos taurus OX=9913 GN=AMELX PE=1 SV=2	1	hf1_eb_18273_84_20032023.ScanId;v=1;d1=14664.14664.2	controllerType=0 controllerNumber=1 scan=14664	38.0983
13364:2	1	G.HPGYINF.S			424.208	2	847.409	847.41	0	-0.9	25	Non	253.3	170.08	170.08	2.72	1104	>sp|P02817|AMELX_BOVIN Amelogenin, X isoform OS=Bos taurus OX=9913 GN=AMELX PE=1 SV=2	1	hf1_eb_18273_84_20032023.ScanId;v=1;d1=12829.12829.2	controllerType=0 controllerNumber=1 scan=12829	34.7592
17091:1	1	G.HPGYINF.S			847.408	1	847.408	847.41	0	-2	25	Non	329.18	256.1	256.1	4.17	1104	>sp|P02817|AMELX_BOVIN Amelogenin, X isoform OS=Bos taurus OX=9913 GN=AMELX PE=1 SV=2	1	hf1_eb_18273_84_20032023.ScanId;v=1;d1=15518.15518.2	controllerType=0 controllerNumber=1 scan=15518	39.5935
17081:2	1	G.HPGYINF.S			424.208	2	847.408	847.41	0	-1.7	25	Non	351.13	310.8	310.8	4.43	1104	>sp|P02817|AMELX_BOVIN Amelogenin, X isoform OS=Bos taurus OX=9913 GN=AMELX PE=1 SV=2	1	hf1_eb_18273_84_20032023.ScanId;v=1;d1=15511.15511.2	controllerType=0 controllerNumber=1 scan=15511	39.5843
16801:1	1	G.HPGYIN[+0.984]F.S		N[+1]	848.391	1	848.391	848.394	0	-2.6	25	Non	174.43	174.43	174.43	2.12	1104	>sp|P02817|AMELX_BOVIN Amelogenin, X isoform OS=Bos taurus OX=9913 GN=AMELX PE=1 SV=2	1	hf1_eb_18273_84_20032023.ScanId;v=1;d1=15304.15304.2	controllerType=0 controllerNumber=1 scan=15304	39.2132
20506:2	1	G.HPGYIN[+0.984]F.S		N[+1]	424.7	2	848.393	848.394	0	-0.4	25	Non	214.12	171.25	171.25	1.78	1104	>sp|P02817|AMELX_BOVIN Amelogenin, X isoform OS=Bos taurus OX=9913 GN=AMELX PE=1 SV=2	1	hf1_eb_18273_84_20032023.ScanId;v=1;d1=18071.18071.2	controllerType=0 controllerNumber=1 scan=18071	44.2318
20236:2	1	G.HPGYIN[+0.984]F.S		N[+1]	424.7	2	848.392	848.394	0	-1.7	25	Non	274.28	218.64	218.64	3.45	1104	>sp|P02817|AMELX_BOVIN Amelogenin, X isoform OS=Bos taurus OX=9913 GN=AMELX PE=1 SV=2	1	hf1_eb_18273_84_20032023.ScanId;v=1;d1=17877.17877.2	controllerType=0 controllerNumber=1 scan=17877	43.8807
17860:2	1	G.HPGYIN[+0.984]F.S		N[+1]	424.7	2	848.393	848.394	0	-1.4	25	Non	292.11	292.11	292.11	4.51	1104	>sp|P02817|AMELX_BOVIN Amelogenin, X isoform OS=Bos taurus OX=9913 GN=AMELX PE=1 SV=2	1	hf1_eb_18273_84_20032023.ScanId;v=1;d1=16106.16106.2	controllerType=0 controllerNumber=1 scan=16106	40.6545
16386:2	1	G.HP[+15.995]GYINF.S		P[+16]	432.205	2	863.403	863.405	0	-1.7	25	Non	293.06	222.69	1.8	3.79	1104	>sp|P02817|AMELX_BOVIN Amelogenin, X isoform OS=Bos taurus OX=9913 GN=AMELX PE=1 SV=2	1	hf1_eb_18273_84_20032023.ScanId;v=1;d1=14999.14999.2	controllerType=0 controllerNumber=1 scan=14999	38.6838
18363:2	1	G.HPGYIN[+0.984]F.S		N[+1]	424.7	2	848.393	848.394	0	-1.1	25	Non	293.39	293.39	293.39	4.51	1104	>sp|P02817|AMELX_BOVIN Amelogenin, X isoform OS=Bos taurus OX=9913 GN=AMELX PE=1 SV=2	1	hf1_eb_18273_84_20032023.ScanId;v=1;d1=16484.16484.2	controllerType=0 controllerNumber=1 scan=16484	41.3382
15628:2	1	G.HPGYIN[+0.984]F.S		N[+1]	424.7	2	848.392	848.394	0	-1.7	25	Non	294.2	294.2	294.2	4.3	1104	>sp|P02817|AMELX_BOVIN Amelogenin, X isoform OS=Bos taurus OX=9913 GN=AMELX PE=1 SV=2	1	hf1_eb_18273_84_20032023.ScanId;v=1;d1=14464.14464.2	controllerType=0 controllerNumber=1 scan=14464	37.7561
16262:2	1	G.HPGYIN[+0.984]F.S		N[+1]	424.7	2	848.393	848.394	0	-1.2	25	Non	294.51	284.06	284.06	4.18	1104	>sp|P02817|AMELX_BOVIN Amelogenin, X isoform OS=Bos taurus OX=9913 GN=AMELX PE=1 SV=2	1	hf1_eb_18273_84_20032023.ScanId;v=1;d1=14916.14916.2	controllerType=0 controllerNumber=1 scan=14916	38.5382
18898:2	1	G.HPGYIN[+0.984]F.S		N[+1]	424.7	2	848.393	848.394	0	-1.2	25	Non	296.21	287.44	287.44	4.18	1104	>sp|P02817|AMELX_BOVIN Amelogenin, X isoform OS=Bos taurus OX=9913 GN=AMELX PE=1 SV=2	1	hf1_eb_18273_84_20032023.ScanId;v=1;d1=16881.16881.2	controllerType=0 controllerNumber=1 scan=16881	42.0422
16822:2	1	G.HPGYIN[+0.984]F.S		N[+1]	424.699	2	848.391	848.394	0	-3	25	Non	301.47	287.7	287.7	4.3	1104	>sp|P02817|AMELX_BOVIN Amelogenin, X isoform OS=Bos taurus OX=9913 GN=AMELX PE=1 SV=2	1	hf1_eb_18273_84_20032023.ScanId;v=1;d1=15320.15320.2	controllerType=0 controllerNumber=1 scan=15320	39.2418
18097:2	1	G.HPGYIN[+0.984]F.S		N[+1]	424.7	2	848.392	848.394	0	-1.7	25	Non	303.73	300.19	300.19	4.3	1104	>sp|P02817|AMELX_BOVIN Amelogenin, X isoform OS=Bos taurus OX=9913 GN=AMELX PE=1 SV=2	1	hf1_eb_18273_84_20032023.ScanId;v=1;d1=16294.16294.2	controllerType=0 controllerNumber=1 scan=16294	41.0006
16552:2	1	G.HPGYIN[+0.984]F.S		N[+1]	424.7	2	848.392	848.394	0	-1.5	25	Non	328.01	289.18	289.18	4.54	1104	>sp|P02817|AMELX_BOVIN Amelogenin, X isoform OS=Bos taurus OX=9913 GN=AMELX PE=1 SV=2	1	hf1_eb_18273_84_20032023.ScanId;v=1;d1=15117.15117.2	controllerType=0 controllerNumber=1 scan=15117	38.8878
17616:2	1	G.HPGYIN[+0.984]F.S		N[+1]	424.7	2	848.393	848.394	0	-1.1	25	Non	328.76	287.46	287.46	4.21	1104	>sp|P02817|AMELX_BOVIN Amelogenin, X isoform OS=Bos taurus OX=9913 GN=AMELX PE=1 SV=2	1	hf1_eb_18273_84_20032023.ScanId;v=1;d1=15914.15914.2	controllerType=0 controllerNumber=1 scan=15914	40.2992
18628:2	1	G.HPGYIN[+0.984]F.S		N[+1]	424.7	2	848.393	848.394	0	-0.9	25	Non	338.41	338.41	338.41	4.73	1104	>sp|P02817|AMELX_BOVIN Amelogenin, X isoform OS=Bos taurus OX=9913 GN=AMELX PE=1 SV=2	1	hf1_eb_18273_84_20032023.ScanId;v=1;d1=16677.16677.2	controllerType=0 controllerNumber=1 scan=16677	41.68
17367:2	1	G.HPGYIN[+0.984]F.S		N[+1]	424.7	2	848.392	848.394	0	-2.1	25	Non	346.26	346.26	346.26	4.52	1104	>sp|P02817|AMELX_BOVIN Amelogenin, X isoform OS=Bos taurus OX=9913 GN=AMELX PE=1 SV=2	1	hf1_eb_18273_84_20032023.ScanId;v=1;d1=15718.15718.2	controllerType=0 controllerNumber=1 scan=15718	39.9405
16864:2	1	G.HP[+15.995]GYIN[+0.984]F.S		N[+1], P[+16]	432.697	2	864.387	864.389	0	-1.9	25	Non	258.03	207.1	1.8	3.45	1104	>sp|P02817|AMELX_BOVIN Amelogenin, X isoform OS=Bos taurus OX=9913 GN=AMELX PE=1 SV=2	1	hf1_eb_18273_84_20032023.ScanId;v=1;d1=15351.15351.2	controllerType=0 controllerNumber=1 scan=15351	39.2961
17406:2	1	G.HP[+15.995]GYIN[+0.984]F.S		N[+1], P[+16]	432.697	2	864.387	864.389	0	-1.6	25	Non	258.45	234.57	0.1	3.45	1104	>sp|P02817|AMELX_BOVIN Amelogenin, X isoform OS=Bos taurus OX=9913 GN=AMELX PE=1 SV=2	1	hf1_eb_18273_84_20032023.ScanId;v=1;d1=15748.15748.2	controllerType=0 controllerNumber=1 scan=15748	39.9943
17132:2	1	G.HP[+15.995]GYIN[+0.984]F.S		N[+1], P[+16]	432.697	2	864.388	864.389	0	-1.2	25	Non	259.15	254.06	1.8	3.69	1104	>sp|P02817|AMELX_BOVIN Amelogenin, X isoform OS=Bos taurus OX=9913 GN=AMELX PE=1 SV=2	1	hf1_eb_18273_84_20032023.ScanId;v=1;d1=15546.15546.2	controllerType=0 controllerNumber=1 scan=15546	39.6391
18107:2	1	G.HPGYINFS[+79.966].Y		S[+80]	507.707	2	1014.41	1014.41	0	-1.6	25	Non	298.9	287.46	287.46	4.3	1104	>sp|P02817|AMELX_BOVIN Amelogenin, X isoform OS=Bos taurus OX=9913 GN=AMELX PE=1 SV=2	1	hf1_eb_18273_84_20032023.ScanId;v=1;d1=16303.16303.2	controllerType=0 controllerNumber=1 scan=16303	41.0147
18542:2	1	G.HPGYIN[+0.984]FS[+79.966].Y		N[+1], S[+80]	508.199	2	1015.39	1015.39	0	-0.8	25	Non	149.03	149.03	149.03	1.7	1104	>sp|P02817|AMELX_BOVIN Amelogenin, X isoform OS=Bos taurus OX=9913 GN=AMELX PE=1 SV=2	1	hf1_eb_18273_84_20032023.ScanId;v=1;d1=16608.16608.2	controllerType=0 controllerNumber=1 scan=16608	41.5535
19577:2	1	G.HPGYIN[+0.984]FS[+79.966].Y		N[+1], S[+80]	508.199	2	1015.39	1015.39	0	-0.5	25	Non	182.37	182.37	182.37	2.36	1104	>sp|P02817|AMELX_BOVIN Amelogenin, X isoform OS=Bos taurus OX=9913 GN=AMELX PE=1 SV=2	1	hf1_eb_18273_84_20032023.ScanId;v=1;d1=17369.17369.2	controllerType=0 controllerNumber=1 scan=17369	42.928
19605:2	1	G.HPGYIN[+0.984]FS[+79.966].Y		N[+1], S[+80]	508.199	2	1015.39	1015.39	0	-1.2	25	Non	276.68	248.2	248.2	4.02	1104	>sp|P02817|AMELX_BOVIN Amelogenin, X isoform OS=Bos taurus OX=9913 GN=AMELX PE=1 SV=2	1	hf1_eb_18273_84_20032023.ScanId;v=1;d1=17391.17391.2	controllerType=0 controllerNumber=1 scan=17391	42.9651
20061:2	1	G.HPGYIN[+0.984]FS[+79.966].Y		N[+1], S[+80]	508.199	2	1015.39	1015.39	0	-0.5	25	Non	310.78	259.93	259.93	4.37	1104	>sp|P02817|AMELX_BOVIN Amelogenin, X isoform OS=Bos taurus OX=9913 GN=AMELX PE=1 SV=2	1	hf1_eb_18273_84_20032023.ScanId;v=1;d1=17747.17747.2	controllerType=0 controllerNumber=1 scan=17747	43.6449
19830:2	1	G.HPGYIN[+0.984]FS[+79.966].Y		N[+1], S[+80]	508.199	2	1015.39	1015.39	0	-1.2	25	Non	359.93	292.23	292.23	4.71	1104	>sp|P02817|AMELX_BOVIN Amelogenin, X isoform OS=Bos taurus OX=9913 GN=AMELX PE=1 SV=2	1	hf1_eb_18273_84_20032023.ScanId;v=1;d1=17569.17569.2	controllerType=0 controllerNumber=1 scan=17569	43.3057
19884:1	1	G.HPGYIN[+0.984]FS[+79.966].Y		N[+1], S[+80]	1015.39	1	1015.39	1015.39	0	-2	25	Non	386.19	292.36	292.36	5.09	1104	>sp|P02817|AMELX_BOVIN Amelogenin, X isoform OS=Bos taurus OX=9913 GN=AMELX PE=1 SV=2	1	hf1_eb_18273_84_20032023.ScanId;v=1;d1=17611.17611.2	controllerType=0 controllerNumber=1 scan=17611	43.3901
21227:2	1	G.HPGYIN[+0.984]FSY.E		N[+1]	549.749	2	1098.49	1098.49	0	0.5	25	Non	340.08	304.04	304.04	3.87	1104	>sp|P02817|AMELX_BOVIN Amelogenin, X isoform OS=Bos taurus OX=9913 GN=AMELX PE=1 SV=2	1	hf1_eb_18273_84_20032023.ScanId;v=1;d1=18583.18583.2	controllerType=0 controllerNumber=1 scan=18583	45.1475
31865:2	1	G.HPGYINFS[+79.966]YEVL.T		S[+80]	759.837	2	1518.67	1518.67	0	0.5	25	Non	186.82	153.1	153.1	1.49	1104	>sp|P02817|AMELX_BOVIN Amelogenin, X isoform OS=Bos taurus OX=9913 GN=AMELX PE=1 SV=2	1	hf1_eb_18273_84_20032023.ScanId;v=1;d1=26046.26046.2	controllerType=0 controllerNumber=1 scan=26046	58.3892
33283:2	1	G.HPGYIN[+0.984]FS[+79.966]YEVL.T		N[+1], S[+80]	760.33	2	1519.65	1519.65	0	0.8	25	Non	223.53	223.53	223.53	2.52	1104	>sp|P02817|AMELX_BOVIN Amelogenin, X isoform OS=Bos taurus OX=9913 GN=AMELX PE=1 SV=2	1	hf1_eb_18273_84_20032023.ScanId;v=1;d1=27010.27010.2	controllerType=0 controllerNumber=1 scan=27010	60.1279
32801:2	1	G.HPGYIN[+0.984]FS[+79.966]YEVLTP.L		N[+1], S[+80]	859.379	2	1717.75	1717.75	0	-0.4	25	Non	167.45	167.45	135.66	2.63	1104	>sp|P02817|AMELX_BOVIN Amelogenin, X isoform OS=Bos taurus OX=9913 GN=AMELX PE=1 SV=2	1	hf1_eb_18273_84_20032023.ScanId;v=1;d1=26689.26689.2	controllerType=0 controllerNumber=1 scan=26689	59.5546
34329:2	1	G.HPGYIN[+0.984]FSYEVLTPL.K		N[+1]	875.938	2	1750.87	1750.87	0	0.1	25	Non	277.01	220.38	220.38	4.52	1104	>sp|P02817|AMELX_BOVIN Amelogenin, X isoform OS=Bos taurus OX=9913 GN=AMELX PE=1 SV=2	1	hf1_eb_18273_84_20032023.ScanId;v=1;d1=27718.27718.2	controllerType=0 controllerNumber=1 scan=27718	61.4052
34632:2	1	G.HPGYIN[+0.984]FSYEVLTPL.K		N[+1]	875.938	2	1750.87	1750.87	0	0	25	Non	357.38	285.54	285.54	5.02	1104	>sp|P02817|AMELX_BOVIN Amelogenin, X isoform OS=Bos taurus OX=9913 GN=AMELX PE=1 SV=2	1	hf1_eb_18273_84_20032023.ScanId;v=1;d1=27919.27919.2	controllerType=0 controllerNumber=1 scan=27919	61.7573
35180:2	1	G.HPGYIN[+0.984]FSYEVLTPL.K		N[+1]	875.938	2	1750.87	1750.87	0	0.1	25	Non	412.57	306.97	306.97	5.37	1104	>sp|P02817|AMELX_BOVIN Amelogenin, X isoform OS=Bos taurus OX=9913 GN=AMELX PE=1 SV=2	1	hf1_eb_18273_84_20032023.ScanId;v=1;d1=28289.28289.2	controllerType=0 controllerNumber=1 scan=28289	62.4237
36395:2	1	G.HPGYIN[+0.984]FS[+79.966]YEVLTPL.K		N[+1], S[+80]	915.922	2	1830.84	1830.84	0	0.5	25	Non	328.52	326.27	225.67	4.66	1104	>sp|P02817|AMELX_BOVIN Amelogenin, X isoform OS=Bos taurus OX=9913 GN=AMELX PE=1 SV=2	1	hf1_eb_18273_84_20032023.ScanId;v=1;d1=29115.29115.2	controllerType=0 controllerNumber=1 scan=29115	63.8859
24813:3	1	G.HPGYINFSYEVLTPLK.W			626.664	3	1877.98	1877.98	0	-1.4	25	NRagged	182.51	182.51	182.51	3.73	1104	>sp|P02817|AMELX_BOVIN Amelogenin, X isoform OS=Bos taurus OX=9913 GN=AMELX PE=1 SV=2	1	hf1_eb_18273_84_20032023.ScanId;v=1;d1=21110.21110.3	controllerType=0 controllerNumber=1 scan=21110	49.6128
31220:2	1	G.HPGYINFS[+79.966]YEVLTPLK.W		S[+80]	979.47	2	1957.93	1957.95	0	-6.9	25	NRagged	189	189	189	2.32	1104	>sp|P02817|AMELX_BOVIN Amelogenin, X isoform OS=Bos taurus OX=9913 GN=AMELX PE=1 SV=2	1	hf1_eb_18273_84_20032023.ScanId;v=1;d1=25591.25591.2	controllerType=0 controllerNumber=1 scan=25591	57.5702
29520:3	1	G.HPGYIN[+0.984]FSYEVLTPLK.W		N[+1]	626.992	3	1878.96	1878.96	0	-1.8	25	NRagged	215.55	215.55	215.55	4.24	1104	>sp|P02817|AMELX_BOVIN Amelogenin, X isoform OS=Bos taurus OX=9913 GN=AMELX PE=1 SV=2	1	hf1_eb_18273_84_20032023.ScanId;v=1;d1=24378.24378.2	controllerType=0 controllerNumber=1 scan=24378	55.3991
30905:3	1	G.HPGYINFS[+79.966]YEVLTPLK.W		S[+80]	653.318	3	1957.94	1957.95	0	-3.2	25	NRagged	443.55	443.55	249.92	7.25	1104	>sp|P02817|AMELX_BOVIN Amelogenin, X isoform OS=Bos taurus OX=9913 GN=AMELX PE=1 SV=2	1	hf1_eb_18273_84_20032023.ScanId;v=1;d1=25374.25374.3	controllerType=0 controllerNumber=1 scan=25374	57.185
30624:3	1	G.HPGYINFS[+79.966]YEVLTPLK.W		S[+80]	653.32	3	1957.94	1957.95	0	-0.5	25	NRagged	474.61	474.61	296.22	7.93	1104	>sp|P02817|AMELX_BOVIN Amelogenin, X isoform OS=Bos taurus OX=9913 GN=AMELX PE=1 SV=2	1	hf1_eb_18273_84_20032023.ScanId;v=1;d1=25182.25182.3	controllerType=0 controllerNumber=1 scan=25182	56.8415
29404:2	1	G.HPGYIN[+0.984]FSYEVLTPLK.W		N[+1]	939.984	2	1878.96	1878.96	0	-1.7	25	NRagged	535.15	494.66	494.66	7.35	1104	>sp|P02817|AMELX_BOVIN Amelogenin, X isoform OS=Bos taurus OX=9913 GN=AMELX PE=1 SV=2	1	hf1_eb_18273_84_20032023.ScanId;v=1;d1=24298.24298.3	controllerType=0 controllerNumber=1 scan=24298	55.2603
29393:3	1	G.HPGYIN[+0.984]FSYEVLTPLK.W		N[+1]	626.992	3	1878.96	1878.96	0	-1.1	25	NRagged	535.36	500.36	500.36	7.94	1104	>sp|P02817|AMELX_BOVIN Amelogenin, X isoform OS=Bos taurus OX=9913 GN=AMELX PE=1 SV=2	1	hf1_eb_18273_84_20032023.ScanId;v=1;d1=24291.24291.3	controllerType=0 controllerNumber=1 scan=24291	55.2497
30939:2	1	G.HPGYINFS[+79.966]YEVLTPLK.W		S[+80]	979.471	2	1957.94	1957.95	0	-5.5	25	NRagged	595.02	595.02	367.47	7.1	1104	>sp|P02817|AMELX_BOVIN Amelogenin, X isoform OS=Bos taurus OX=9913 GN=AMELX PE=1 SV=2	1	hf1_eb_18273_84_20032023.ScanId;v=1;d1=25397.25397.2	controllerType=0 controllerNumber=1 scan=25397	57.2252
30654:2	1	G.HPGYINFS[+79.966]YEVLTPLK.W		S[+80]	979.478	2	1957.95	1957.95	0	1.3	25	NRagged	748.93	748.93	414.39	11.59	1104	>sp|P02817|AMELX_BOVIN Amelogenin, X isoform OS=Bos taurus OX=9913 GN=AMELX PE=1 SV=2	1	hf1_eb_18273_84_20032023.ScanId;v=1;d1=25202.25202.2	controllerType=0 controllerNumber=1 scan=25202	56.8772
32622:2	1	G.HPGYIN[+0.984]FS[+79.966]YEVLTPLK.W		N[+1], S[+80]	979.972	2	1958.94	1958.93	0	4	25	NRagged	215.15	215.15	113.38	2.65	1104	>sp|P02817|AMELX_BOVIN Amelogenin, X isoform OS=Bos taurus OX=9913 GN=AMELX PE=1 SV=2	1	hf1_eb_18273_84_20032023.ScanId;v=1;d1=26566.26566.2	controllerType=0 controllerNumber=1 scan=26566	59.3355
32349:2	1	G.HPGYIN[+0.984]FS[+79.966]YEVLTPLK.W		N[+1], S[+80]	979.967	2	1958.93	1958.93	0	-1.9	25	NRagged	242.8	242.8	149.58	5.36	1104	>sp|P02817|AMELX_BOVIN Amelogenin, X isoform OS=Bos taurus OX=9913 GN=AMELX PE=1 SV=2	1	hf1_eb_18273_84_20032023.ScanId;v=1;d1=26372.26372.2	controllerType=0 controllerNumber=1 scan=26372	58.9815
31516:2	1	G.HPGYIN[+0.984]FS[+79.966]YEVLTPLK.W		N[+1], S[+80]	979.967	2	1958.93	1958.93	0	-1.3	25	NRagged	309.17	309.17	200.34	6.07	1104	>sp|P02817|AMELX_BOVIN Amelogenin, X isoform OS=Bos taurus OX=9913 GN=AMELX PE=1 SV=2	1	hf1_eb_18273_84_20032023.ScanId;v=1;d1=25790.25790.2	controllerType=0 controllerNumber=1 scan=25790	57.9209
31666:3	1	G.HPGYIN[+0.984]FS[+79.966]YEVLTPLK.W		N[+1], S[+80]	653.648	3	1958.93	1958.93	0	-0.4	25	NRagged	316.37	316.37	194.82	6.19	1104	>sp|P02817|AMELX_BOVIN Amelogenin, X isoform OS=Bos taurus OX=9913 GN=AMELX PE=1 SV=2	1	hf1_eb_18273_84_20032023.ScanId;v=1;d1=25904.25904.3	controllerType=0 controllerNumber=1 scan=25904	58.1315
31924:3	1	G.HPGYIN[+0.984]FS[+79.966]YEVLTPLK.W		N[+1], S[+80]	653.648	3	1958.93	1958.93	0	0.3	25	NRagged	389.49	389.49	246.04	7.2	1104	>sp|P02817|AMELX_BOVIN Amelogenin, X isoform OS=Bos taurus OX=9913 GN=AMELX PE=1 SV=2	1	hf1_eb_18273_84_20032023.ScanId;v=1;d1=26088.26088.3	controllerType=0 controllerNumber=1 scan=26088	58.4691
32034:2	1	G.HPGYIN[+0.984]FS[+79.966]YEVLTPLK.W		N[+1], S[+80]	979.971	2	1958.93	1958.93	0	1.9	25	NRagged	633.78	633.78	395.64	9.12	1104	>sp|P02817|AMELX_BOVIN Amelogenin, X isoform OS=Bos taurus OX=9913 GN=AMELX PE=1 SV=2	1	hf1_eb_18273_84_20032023.ScanId;v=1;d1=26162.26162.2	controllerType=0 controllerNumber=1 scan=26162	58.611
31774:2	1	G.HPGYIN[+0.984]FS[+79.966]YEVLTPLK.W		N[+1], S[+80]	979.969	2	1958.93	1958.93	0	0.6	25	NRagged	800.63	800.63	438.17	13.59	1104	>sp|P02817|AMELX_BOVIN Amelogenin, X isoform OS=Bos taurus OX=9913 GN=AMELX PE=1 SV=2	1	hf1_eb_18273_84_20032023.ScanId;v=1;d1=25980.25980.2	controllerType=0 controllerNumber=1 scan=25980	58.2703
30940:2	1	G.HPGYIN[+0.984]FS[+79.966]YEVLTPLK.W		N[+1], S[+80]	979.971	2	1958.93	1958.93	0	2.2	25	NRagged	803.42	803.42	480.45	13.59	1104	>sp|P02817|AMELX_BOVIN Amelogenin, X isoform OS=Bos taurus OX=9913 GN=AMELX PE=1 SV=2	1	hf1_eb_18273_84_20032023.ScanId;v=1;d1=25397.25397.2	controllerType=0 controllerNumber=1 scan=25397	57.2252
31140:2	1	G.HP[+15.995]GYIN[+0.984]FS[+79.966]YEVLTPLK.W		N[+1], P[+16], S[+80]	987.964	2	1974.92	1974.92	0	-1.8	25	NRagged	80.91	80.91	30.45	2.36	1104	>sp|P02817|AMELX_BOVIN Amelogenin, X isoform OS=Bos taurus OX=9913 GN=AMELX PE=1 SV=2	1	hf1_eb_18273_84_20032023.ScanId;v=1;d1=25532.25532.2	controllerType=0 controllerNumber=1 scan=25532	57.4623
08160:1	1	H.PGYIN[+0.984].F		N[+1]	564.266	1	564.266	564.266	0	-0.5	26	Non	320.94	266.84	266.84	3.76	1104	>sp|P02817|AMELX_BOVIN Amelogenin, X isoform OS=Bos taurus OX=9913 GN=AMELX PE=1 SV=2	1	hf1_eb_18273_84_20032023.ScanId;v=1;d1=8946.8946.2	controllerType=0 controllerNumber=1 scan=8946	27.4871
21601:1	1	H.PGYINF.S			710.35	1	710.35	710.351	0	-1.8	26	Non	211.76	206.73	206.73	1.57	1104	>sp|P02817|AMELX_BOVIN Amelogenin, X isoform OS=Bos taurus OX=9913 GN=AMELX PE=1 SV=2	1	hf1_eb_18273_84_20032023.ScanId;v=1;d1=18845.18845.2	controllerType=0 controllerNumber=1 scan=18845	45.6129
21146:1	1	H.PGYINF.S			710.352	1	710.352	710.351	0	1.5	26	Non	216.05	192.46	192.46	0.72	1104	>sp|P02817|AMELX_BOVIN Amelogenin, X isoform OS=Bos taurus OX=9913 GN=AMELX PE=1 SV=2	1	hf1_eb_18273_84_20032023.ScanId;v=1;d1=18525.18525.2	controllerType=0 controllerNumber=1 scan=18525	45.042
21695:1	1	H.PGYINF.S			710.35	1	710.35	710.351	0	-1.2	26	Non	224.84	224.84	224.84	1.19	1104	>sp|P02817|AMELX_BOVIN Amelogenin, X isoform OS=Bos taurus OX=9913 GN=AMELX PE=1 SV=2	1	hf1_eb_18273_84_20032023.ScanId;v=1;d1=18911.18911.2	controllerType=0 controllerNumber=1 scan=18911	45.7285
23664:1	1	H.PGYINF.S			710.351	1	710.351	710.351	0	0	26	Non	277.34	261	261	3.39	1104	>sp|P02817|AMELX_BOVIN Amelogenin, X isoform OS=Bos taurus OX=9913 GN=AMELX PE=1 SV=2	1	hf1_eb_18273_84_20032023.ScanId;v=1;d1=20298.20298.3	controllerType=0 controllerNumber=1 scan=20298	48.1765
22251:1	1	H.PGYIN[+0.984]F.S		N[+1]	711.335	1	711.335	711.335	0	-0.5	26	Non	278.34	191.96	191.96	2.98	1104	>sp|P02817|AMELX_BOVIN Amelogenin, X isoform OS=Bos taurus OX=9913 GN=AMELX PE=1 SV=2	1	hf1_eb_18273_84_20032023.ScanId;v=1;d1=19306.19306.2	controllerType=0 controllerNumber=1 scan=19306	46.4235
22580:1	1	H.PGYIN[+0.984]F.S		N[+1]	711.336	1	711.336	711.335	0	1.4	26	Non	342.37	231.29	231.29	3.39	1104	>sp|P02817|AMELX_BOVIN Amelogenin, X isoform OS=Bos taurus OX=9913 GN=AMELX PE=1 SV=2	1	hf1_eb_18273_84_20032023.ScanId;v=1;d1=19543.19543.2	controllerType=0 controllerNumber=1 scan=19543	46.8382
24315:1	1	H.PGYIN[+0.984]F.S		N[+1]	711.335	1	711.335	711.335	0	0.1	26	Non	355.9	267.96	267.96	3.76	1104	>sp|P02817|AMELX_BOVIN Amelogenin, X isoform OS=Bos taurus OX=9913 GN=AMELX PE=1 SV=2	1	hf1_eb_18273_84_20032023.ScanId;v=1;d1=20762.20762.2	controllerType=0 controllerNumber=1 scan=20762	49.0046
22302:1	1	H.PGYIN[+0.984]F.S		N[+1]	711.335	1	711.335	711.335	0	0.2	26	Non	362.8	254.9	254.9	3.81	1104	>sp|P02817|AMELX_BOVIN Amelogenin, X isoform OS=Bos taurus OX=9913 GN=AMELX PE=1 SV=2	1	hf1_eb_18273_84_20032023.ScanId;v=1;d1=19342.19342.2	controllerType=0 controllerNumber=1 scan=19342	46.483
24966:1	1	H.PGYIN[+0.984]F.S		N[+1]	711.334	1	711.334	711.335	0	-0.6	26	Non	374.36	245.56	245.56	4.14	1104	>sp|P02817|AMELX_BOVIN Amelogenin, X isoform OS=Bos taurus OX=9913 GN=AMELX PE=1 SV=2	1	hf1_eb_18273_84_20032023.ScanId;v=1;d1=21219.21219.2	controllerType=0 controllerNumber=1 scan=21219	49.8065
21441:1	1	H.PGYIN[+0.984]FS.Y		N[+1]	798.365	1	798.365	798.367	0	-1.9	26	Non	280.23	253.33	253.33	3.83	1104	>sp|P02817|AMELX_BOVIN Amelogenin, X isoform OS=Bos taurus OX=9913 GN=AMELX PE=1 SV=2	1	hf1_eb_18273_84_20032023.ScanId;v=1;d1=18733.18733.2	controllerType=0 controllerNumber=1 scan=18733	45.4126
25144:1	1	H.PGYIN[+0.984]FS[+79.966].Y		N[+1], S[+80]	878.333	1	878.333	878.333	0	-0.3	26	Non	214.62	214.62	214.62	3.08	1104	>sp|P02817|AMELX_BOVIN Amelogenin, X isoform OS=Bos taurus OX=9913 GN=AMELX PE=1 SV=2	1	hf1_eb_18273_84_20032023.ScanId;v=1;d1=21345.21345.2	controllerType=0 controllerNumber=1 scan=21345	50.0307
25544:1	1	H.PGYIN[+0.984]FS[+79.966].Y		N[+1], S[+80]	878.332	1	878.332	878.333	0	-1.7	26	Non	294.81	276.6	276.6	4.55	1104	>sp|P02817|AMELX_BOVIN Amelogenin, X isoform OS=Bos taurus OX=9913 GN=AMELX PE=1 SV=2	1	hf1_eb_18273_84_20032023.ScanId;v=1;d1=21636.21636.2	controllerType=0 controllerNumber=1 scan=21636	50.5515
25247:1	1	H.PGYIN[+0.984]FS[+79.966].Y		N[+1], S[+80]	878.332	1	878.332	878.333	0	-1.4	26	Non	370.31	313.71	313.71	5.46	1104	>sp|P02817|AMELX_BOVIN Amelogenin, X isoform OS=Bos taurus OX=9913 GN=AMELX PE=1 SV=2	1	hf1_eb_18273_84_20032023.ScanId;v=1;d1=21417.21417.2	controllerType=0 controllerNumber=1 scan=21417	50.1578
36920:2	1	H.PGYIN[+0.984]FS[+79.966]YEVLTPL.K		N[+1], S[+80]	847.392	2	1693.78	1693.78	0	0	26	Non	331.62	326.81	287.99	4.76	1104	>sp|P02817|AMELX_BOVIN Amelogenin, X isoform OS=Bos taurus OX=9913 GN=AMELX PE=1 SV=2	1	hf1_eb_18273_84_20032023.ScanId;v=1;d1=29487.29487.2	controllerType=0 controllerNumber=1 scan=29487	64.5034
32941:2	1	H.PGYINFSYEVLTPLK.W			870.967	2	1740.93	1740.92	0	3.2	26	NRagged	312.47	312.47	312.47	4.62	1104	>sp|P02817|AMELX_BOVIN Amelogenin, X isoform OS=Bos taurus OX=9913 GN=AMELX PE=1 SV=2	1	hf1_eb_18273_84_20032023.ScanId;v=1;d1=26781.26781.2	controllerType=0 controllerNumber=1 scan=26781	59.7188
33611:2	1	H.PGYIN[+0.984]FSYEVLTPLK.W		N[+1]	871.455	2	1741.9	1741.9	0	-1.7	26	NRagged	172.58	172.58	172.58	3.23	1104	>sp|P02817|AMELX_BOVIN Amelogenin, X isoform OS=Bos taurus OX=9913 GN=AMELX PE=1 SV=2	1	hf1_eb_18273_84_20032023.ScanId;v=1;d1=27231.27231.2	controllerType=0 controllerNumber=1 scan=27231	60.5284
34897:2	1	H.PGYINFS[+79.966]YEVLTPLK.W		S[+80]	910.949	2	1820.89	1820.89	0	1.9	26	NRagged	263.92	263.92	200.78	4.95	1104	>sp|P02817|AMELX_BOVIN Amelogenin, X isoform OS=Bos taurus OX=9913 GN=AMELX PE=1 SV=2	1	hf1_eb_18273_84_20032023.ScanId;v=1;d1=28101.28101.2	controllerType=0 controllerNumber=1 scan=28101	62.0896
32655:2	1	H.PGYIN[+0.984]FSYEVLTPLK.W		N[+1]	871.456	2	1741.91	1741.9	0	0.3	26	NRagged	458.22	442.02	442.02	7.16	1104	>sp|P02817|AMELX_BOVIN Amelogenin, X isoform OS=Bos taurus OX=9913 GN=AMELX PE=1 SV=2	1	hf1_eb_18273_84_20032023.ScanId;v=1;d1=26587.26587.2	controllerType=0 controllerNumber=1 scan=26587	59.3727
33972:2	1	H.PGYIN[+0.984]FSYEVLTPLK.W		N[+1]	871.458	2	1741.91	1741.9	0	2	26	NRagged	666.48	620.5	620.5	9.97	1104	>sp|P02817|AMELX_BOVIN Amelogenin, X isoform OS=Bos taurus OX=9913 GN=AMELX PE=1 SV=2	1	hf1_eb_18273_84_20032023.ScanId;v=1;d1=27482.27482.2	controllerType=0 controllerNumber=1 scan=27482	60.9821
35346:2	1	H.PGYINFS[+79.966]YEVLTPLK.W		S[+80]	910.948	2	1820.89	1820.89	0	1.4	26	NRagged	905.88	754.07	627.58	14.97	1104	>sp|P02817|AMELX_BOVIN Amelogenin, X isoform OS=Bos taurus OX=9913 GN=AMELX PE=1 SV=2	1	hf1_eb_18273_84_20032023.ScanId;v=1;d1=28402.28402.2	controllerType=0 controllerNumber=1 scan=28402	62.6236
36139:3	1	H.PGYIN[+0.984]FS[+79.966]YEVLTPLK.W		N[+1], S[+80]	607.962	3	1821.87	1821.87	0	0.6	26	NRagged	165.3	165.3	100.69	2.31	1104	>sp|P02817|AMELX_BOVIN Amelogenin, X isoform OS=Bos taurus OX=9913 GN=AMELX PE=1 SV=2	1	hf1_eb_18273_84_20032023.ScanId;v=1;d1=28949.28949.2	controllerType=0 controllerNumber=1 scan=28949	63.6021
34729:2	1	H.PGYIN[+0.984]FS[+79.966]YEVLTPLK.W		N[+1], S[+80]	911.439	2	1821.87	1821.87	0	-0.1	26	NRagged	294.61	294.61	218.23	5.89	1104	>sp|P02817|AMELX_BOVIN Amelogenin, X isoform OS=Bos taurus OX=9913 GN=AMELX PE=1 SV=2	1	hf1_eb_18273_84_20032023.ScanId;v=1;d1=27985.27985.2	controllerType=0 controllerNumber=1 scan=27985	61.8786
36052:2	1	H.PGYIN[+0.984]FS[+79.966]YEVLTPLK.W		N[+1], S[+80]	911.439	2	1821.87	1821.87	0	0.3	26	NRagged	845.4	791.22	634.93	13.31	1104	>sp|P02817|AMELX_BOVIN Amelogenin, X isoform OS=Bos taurus OX=9913 GN=AMELX PE=1 SV=2	1	hf1_eb_18273_84_20032023.ScanId;v=1;d1=28892.28892.2	controllerType=0 controllerNumber=1 scan=28892	63.5022
35191:2	1	H.PGYIN[+0.984]FS[+79.966]YEVLTPLK.W		N[+1], S[+80]	911.439	2	1821.87	1821.87	0	0.1	26	NRagged	845.56	733.15	611.58	13.31	1104	>sp|P02817|AMELX_BOVIN Amelogenin, X isoform OS=Bos taurus OX=9913 GN=AMELX PE=1 SV=2	1	hf1_eb_18273_84_20032023.ScanId;v=1;d1=28296.28296.2	controllerType=0 controllerNumber=1 scan=28296	62.4371
21620:1	1	P.GYIN[+0.984]F.S		N[+1]	614.281	1	614.281	614.282	0	-1.4	27	Non	181.75	181.75	181.75	1.41	1104	>sp|P02817|AMELX_BOVIN Amelogenin, X isoform OS=Bos taurus OX=9913 GN=AMELX PE=1 SV=2	1	hf1_eb_18273_84_20032023.ScanId;v=1;d1=18858.18858.2	controllerType=0 controllerNumber=1 scan=18858	45.6373
26539:1	1	P.GYIN[+0.984]F.S		N[+1]	614.282	1	614.282	614.282	0	0.2	27	Non	242.2	224.95	224.95	2.8	1104	>sp|P02817|AMELX_BOVIN Amelogenin, X isoform OS=Bos taurus OX=9913 GN=AMELX PE=1 SV=2	1	hf1_eb_18273_84_20032023.ScanId;v=1;d1=22325.22325.4	controllerType=0 controllerNumber=1 scan=22325	51.7911
22068:1	1	P.GYINFS[+79.966].Y		S[+80]	780.295	1	780.295	780.296	0	-1.4	27	Non	213.46	213.46	213.46	2.66	1104	>sp|P02817|AMELX_BOVIN Amelogenin, X isoform OS=Bos taurus OX=9913 GN=AMELX PE=1 SV=2	1	hf1_eb_18273_84_20032023.ScanId;v=1;d1=19176.19176.2	controllerType=0 controllerNumber=1 scan=19176	46.1941
20483:1	1	P.GYIN[+0.984]FS.Y		N[+1]	701.314	1	701.314	701.314	0	0.2	27	Non	288.52	218.23	218.23	2.54	1104	>sp|P02817|AMELX_BOVIN Amelogenin, X isoform OS=Bos taurus OX=9913 GN=AMELX PE=1 SV=2	1	hf1_eb_18273_84_20032023.ScanId;v=1;d1=18055.18055.2	controllerType=0 controllerNumber=1 scan=18055	44.203
19801:1	1	P.GYIN[+0.984]FS.Y		N[+1]	701.313	1	701.313	701.314	0	-2.2	27	Non	298.11	226.81	226.81	3.49	1104	>sp|P02817|AMELX_BOVIN Amelogenin, X isoform OS=Bos taurus OX=9913 GN=AMELX PE=1 SV=2	1	hf1_eb_18273_84_20032023.ScanId;v=1;d1=17542.17542.2	controllerType=0 controllerNumber=1 scan=17542	43.2522
28939:2	1	P.GYINFSYEVL.T			602.797	2	1204.59	1204.59	0	-1.6	27	Non	206.28	206.28	206.28	1.67	1104	>sp|P02817|AMELX_BOVIN Amelogenin, X isoform OS=Bos taurus OX=9913 GN=AMELX PE=1 SV=2	1	hf1_eb_18273_84_20032023.ScanId;v=1;d1=23985.23985.2	controllerType=0 controllerNumber=1 scan=23985	54.706
34863:2	1	P.GYINFSYEVLTPL.K			758.389	2	1515.77	1515.77	0	-1.1	27	Non	316.06	293.78	293.78	4.59	1104	>sp|P02817|AMELX_BOVIN Amelogenin, X isoform OS=Bos taurus OX=9913 GN=AMELX PE=1 SV=2	1	hf1_eb_18273_84_20032023.ScanId;v=1;d1=28079.28079.2	controllerType=0 controllerNumber=1 scan=28079	62.0509
36824:2	1	P.GYINFS[+79.966]YEVLTPL.K		S[+80]	798.374	2	1595.74	1595.74	0	0.8	27	Non	222.77	222.77	222.77	2.61	1104	>sp|P02817|AMELX_BOVIN Amelogenin, X isoform OS=Bos taurus OX=9913 GN=AMELX PE=1 SV=2	1	hf1_eb_18273_84_20032023.ScanId;v=1;d1=29421.29421.2	controllerType=0 controllerNumber=1 scan=29421	64.3891
36602:2	1	P.GYIN[+0.984]FSYEVLTPL.K		N[+1]	758.882	2	1516.76	1516.76	0	-0.6	27	Non	320.17	221.2	221.2	4.32	1104	>sp|P02817|AMELX_BOVIN Amelogenin, X isoform OS=Bos taurus OX=9913 GN=AMELX PE=1 SV=2	1	hf1_eb_18273_84_20032023.ScanId;v=1;d1=29266.29266.2	controllerType=0 controllerNumber=1 scan=29266	64.1322
27652:3	1	P.GYINFSYEVLTPLK.W			548.627	3	1643.87	1643.87	0	-0.9	27	NRagged	197.44	197.44	197.44	2.54	1104	>sp|P02817|AMELX_BOVIN Amelogenin, X isoform OS=Bos taurus OX=9913 GN=AMELX PE=1 SV=2	1	hf1_eb_18273_84_20032023.ScanId;v=1;d1=23089.23089.3	controllerType=0 controllerNumber=1 scan=23089	53.1338
27871:3	1	P.GYINFSYEVLTPLK.W			548.627	3	1643.87	1643.87	0	-0.7	27	NRagged	268.21	253.38	253.38	4.88	1104	>sp|P02817|AMELX_BOVIN Amelogenin, X isoform OS=Bos taurus OX=9913 GN=AMELX PE=1 SV=2	1	hf1_eb_18273_84_20032023.ScanId;v=1;d1=23241.23241.3	controllerType=0 controllerNumber=1 scan=23241	53.3978
27568:3	1	P.GYINFSYEVLTPLK.W			548.627	3	1643.87	1643.87	0	-0.4	27	NRagged	307.12	267.8	267.8	5.23	1104	>sp|P02817|AMELX_BOVIN Amelogenin, X isoform OS=Bos taurus OX=9913 GN=AMELX PE=1 SV=2	1	hf1_eb_18273_84_20032023.ScanId;v=1;d1=23034.23034.3	controllerType=0 controllerNumber=1 scan=23034	53.0403
30841:2	1	P.GYINFSYEVLTPLK.W			822.438	2	1643.87	1643.87	0	0.5	27	NRagged	323.92	323.92	323.92	5.95	1104	>sp|P02817|AMELX_BOVIN Amelogenin, X isoform OS=Bos taurus OX=9913 GN=AMELX PE=1 SV=2	1	hf1_eb_18273_84_20032023.ScanId;v=1;d1=25328.25328.2	controllerType=0 controllerNumber=1 scan=25328	57.0991
29215:3	1	P.GYINFSYEVLTPLK.W			548.627	3	1643.87	1643.87	0	-0.5	27	NRagged	336.84	336.84	336.84	5.66	1104	>sp|P02817|AMELX_BOVIN Amelogenin, X isoform OS=Bos taurus OX=9913 GN=AMELX PE=1 SV=2	1	hf1_eb_18273_84_20032023.ScanId;v=1;d1=24172.24172.3	controllerType=0 controllerNumber=1 scan=24172	55.0396
33157:3	1	P.GYIN[+0.984]FSYEVLTPLK.W		N[+1]	548.956	3	1644.85	1644.85	0	0.1	27	NRagged	161.27	161.27	161.27	3.05	1104	>sp|P02817|AMELX_BOVIN Amelogenin, X isoform OS=Bos taurus OX=9913 GN=AMELX PE=1 SV=2	1	hf1_eb_18273_84_20032023.ScanId;v=1;d1=26927.26927.3	controllerType=0 controllerNumber=1 scan=26927	59.9781
29782:3	1	P.GYIN[+0.984]FSYEVLTPLK.W		N[+1]	548.955	3	1644.85	1644.85	0	-0.3	27	NRagged	266.55	266.55	266.55	4.99	1104	>sp|P02817|AMELX_BOVIN Amelogenin, X isoform OS=Bos taurus OX=9913 GN=AMELX PE=1 SV=2	1	hf1_eb_18273_84_20032023.ScanId;v=1;d1=24565.24565.3	controllerType=0 controllerNumber=1 scan=24565	55.7334
28896:3	1	P.GYIN[+0.984]FSYEVLTPLK.W		N[+1]	548.954	3	1644.85	1644.85	0	-3.1	27	NRagged	271.61	241.19	241.19	4.67	1104	>sp|P02817|AMELX_BOVIN Amelogenin, X isoform OS=Bos taurus OX=9913 GN=AMELX PE=1 SV=2	1	hf1_eb_18273_84_20032023.ScanId;v=1;d1=23956.23956.3	controllerType=0 controllerNumber=1 scan=23956	54.6557
33581:2	1	P.GYINFS[+79.966]YEVLTPLK.W		S[+80]	862.422	2	1723.84	1723.83	0	1.6	27	NRagged	300.04	300.04	204.2	5.62	1104	>sp|P02817|AMELX_BOVIN Amelogenin, X isoform OS=Bos taurus OX=9913 GN=AMELX PE=1 SV=2	1	hf1_eb_18273_84_20032023.ScanId;v=1;d1=27215.27215.2	controllerType=0 controllerNumber=1 scan=27215	60.5014
32239:2	1	P.GYIN[+0.984]FSYEVLTPLK.W		N[+1]	822.93	2	1644.85	1644.85	0	1	27	NRagged	408.09	402.86	402.86	7.27	1104	>sp|P02817|AMELX_BOVIN Amelogenin, X isoform OS=Bos taurus OX=9913 GN=AMELX PE=1 SV=2	1	hf1_eb_18273_84_20032023.ScanId;v=1;d1=26299.26299.2	controllerType=0 controllerNumber=1 scan=26299	58.8529
33295:2	1	P.GYINFS[+79.966]YEVLTPLK.W		S[+80]	862.422	2	1723.84	1723.83	0	1.3	27	NRagged	415.31	415.31	323.32	7.27	1104	>sp|P02817|AMELX_BOVIN Amelogenin, X isoform OS=Bos taurus OX=9913 GN=AMELX PE=1 SV=2	1	hf1_eb_18273_84_20032023.ScanId;v=1;d1=27016.27016.2	controllerType=0 controllerNumber=1 scan=27016	60.1369
31949:2	1	P.GYIN[+0.984]FSYEVLTPLK.W		N[+1]	822.931	2	1644.85	1644.85	0	1.6	27	NRagged	434.96	434.96	434.96	7.27	1104	>sp|P02817|AMELX_BOVIN Amelogenin, X isoform OS=Bos taurus OX=9913 GN=AMELX PE=1 SV=2	1	hf1_eb_18273_84_20032023.ScanId;v=1;d1=26104.26104.2	controllerType=0 controllerNumber=1 scan=26104	58.496
33110:2	1	P.GYIN[+0.984]FSYEVLTPLK.W		N[+1]	822.931	2	1644.85	1644.85	0	1.3	27	NRagged	537.6	451.94	451.94	7.3	1104	>sp|P02817|AMELX_BOVIN Amelogenin, X isoform OS=Bos taurus OX=9913 GN=AMELX PE=1 SV=2	1	hf1_eb_18273_84_20032023.ScanId;v=1;d1=26896.26896.2	controllerType=0 controllerNumber=1 scan=26896	59.9231
34383:2	1	P.GYINFS[+79.966]YEVLTPLK.W		S[+80]	862.42	2	1723.83	1723.83	0	-0.8	27	NRagged	673.63	584.82	495.53	10.31	1104	>sp|P02817|AMELX_BOVIN Amelogenin, X isoform OS=Bos taurus OX=9913 GN=AMELX PE=1 SV=2	1	hf1_eb_18273_84_20032023.ScanId;v=1;d1=27753.27753.2	controllerType=0 controllerNumber=1 scan=27753	61.4661
33365:2	1	P.GYINFS[+79.966]Y[+15.995]EVLTPLK.W		S[+80], Y[+16]	870.417	2	1739.83	1739.83	0	-1.1	27	NRagged	191.96	191.96	30.71	3.44	1104	>sp|P02817|AMELX_BOVIN Amelogenin, X isoform OS=Bos taurus OX=9913 GN=AMELX PE=1 SV=2	1	hf1_eb_18273_84_20032023.ScanId;v=1;d1=27067.27067.3	controllerType=0 controllerNumber=1 scan=27067	60.233
32722:2	1	P.GYIN[+0.984]FS[+79.966]YEVLTPLK.W		N[+1], S[+80]	862.913	2	1724.82	1724.82	0	-0.3	27	NRagged	226.2	226.2	180.38	3.83	1104	>sp|P02817|AMELX_BOVIN Amelogenin, X isoform OS=Bos taurus OX=9913 GN=AMELX PE=1 SV=2	1	hf1_eb_18273_84_20032023.ScanId;v=1;d1=26634.26634.2	controllerType=0 controllerNumber=1 scan=26634	59.4577
35186:3	1	P.GYIN[+0.984]FS[+79.966]YEVLTPLK.W		N[+1], S[+80]	575.61	3	1724.82	1724.82	0	-1.6	27	NRagged	231.83	231.83	148.33	3.54	1104	>sp|P02817|AMELX_BOVIN Amelogenin, X isoform OS=Bos taurus OX=9913 GN=AMELX PE=1 SV=2	1	hf1_eb_18273_84_20032023.ScanId;v=1;d1=28292.28292.3	controllerType=0 controllerNumber=1 scan=28292	62.4282
33207:2	1	P.GYIN[+0.984]FS[+79.966]YEVLTPLK.W		N[+1], S[+80]	862.91	2	1724.81	1724.82	0	-2.6	27	NRagged	302.82	302.82	185.53	5.68	1104	>sp|P02817|AMELX_BOVIN Amelogenin, X isoform OS=Bos taurus OX=9913 GN=AMELX PE=1 SV=2	1	hf1_eb_18273_84_20032023.ScanId;v=1;d1=26959.26959.2	controllerType=0 controllerNumber=1 scan=26959	60.0338
21521:2	1	P.GYINF[+15.995]S[+79.966]YEVLTPLK.W		F[+16], S[+80]	870.414	2	1739.82	1739.83	0	-4.4	27	NRagged	307.5	307.5	106.49	4.92	1104	>sp|P02817|AMELX_BOVIN Amelogenin, X isoform OS=Bos taurus OX=9913 GN=AMELX PE=1 SV=2	1	hf1_eb_18273_84_20032023.ScanId;v=1;d1=18786.18786.2	controllerType=0 controllerNumber=1 scan=18786	45.5064
36204:2	1	P.GYIN[+0.984]FS[+79.966]YEVLTPLK.W		N[+1], S[+80]	862.91	2	1724.81	1724.82	0	-2.6	27	NRagged	355.19	348.7	309.64	5.85	1104	>sp|P02817|AMELX_BOVIN Amelogenin, X isoform OS=Bos taurus OX=9913 GN=AMELX PE=1 SV=2	1	hf1_eb_18273_84_20032023.ScanId;v=1;d1=28994.28994.2	controllerType=0 controllerNumber=1 scan=28994	63.6805
36096:2	1	P.GYIN[+0.984]FS[+79.966]YEVLTPLK.W		N[+1], S[+80]	862.912	2	1724.82	1724.82	0	-0.6	27	NRagged	445.73	402.99	395.31	7.63	1104	>sp|P02817|AMELX_BOVIN Amelogenin, X isoform OS=Bos taurus OX=9913 GN=AMELX PE=1 SV=2	1	hf1_eb_18273_84_20032023.ScanId;v=1;d1=28922.28922.2	controllerType=0 controllerNumber=1 scan=28922	63.5558
34284:2	1	P.GYIN[+0.984]FS[+79.966]YEVLTPLK.W		N[+1], S[+80]	862.912	2	1724.82	1724.82	0	-0.8	27	NRagged	499.88	465.95	261.8	7.6	1104	>sp|P02817|AMELX_BOVIN Amelogenin, X isoform OS=Bos taurus OX=9913 GN=AMELX PE=1 SV=2	1	hf1_eb_18273_84_20032023.ScanId;v=1;d1=27685.27685.2	controllerType=0 controllerNumber=1 scan=27685	61.3471
35800:2	1	P.GYIN[+0.984]FS[+79.966]YEVLTPLK.W		N[+1], S[+80]	862.913	2	1724.82	1724.82	0	0.3	27	NRagged	526.21	489.8	413.44	7.64	1104	>sp|P02817|AMELX_BOVIN Amelogenin, X isoform OS=Bos taurus OX=9913 GN=AMELX PE=1 SV=2	1	hf1_eb_18273_84_20032023.ScanId;v=1;d1=28729.28729.2	controllerType=0 controllerNumber=1 scan=28729	63.2104
34957:2	1	P.GYIN[+0.984]FS[+79.966]YEVLTPLK.W		N[+1], S[+80]	862.913	2	1724.82	1724.82	0	-0.4	27	NRagged	555.23	502.79	476.65	7.64	1104	>sp|P02817|AMELX_BOVIN Amelogenin, X isoform OS=Bos taurus OX=9913 GN=AMELX PE=1 SV=2	1	hf1_eb_18273_84_20032023.ScanId;v=1;d1=28142.28142.2	controllerType=0 controllerNumber=1 scan=28142	62.1658
34681:2	1	P.GYIN[+0.984]FS[+79.966]YEVLTPLK.W		N[+1], S[+80]	862.912	2	1724.82	1724.82	0	-0.8	27	NRagged	579.74	529.13	460.17	8.31	1104	>sp|P02817|AMELX_BOVIN Amelogenin, X isoform OS=Bos taurus OX=9913 GN=AMELX PE=1 SV=2	1	hf1_eb_18273_84_20032023.ScanId;v=1;d1=27952.27952.2	controllerType=0 controllerNumber=1 scan=27952	61.8212
35526:2	1	P.GYIN[+0.984]FS[+79.966]YEVLTPLK.W		N[+1], S[+80]	862.911	2	1724.82	1724.82	0	-1.6	27	NRagged	606.22	555.8	503.5	9.1	1104	>sp|P02817|AMELX_BOVIN Amelogenin, X isoform OS=Bos taurus OX=9913 GN=AMELX PE=1 SV=2	1	hf1_eb_18273_84_20032023.ScanId;v=1;d1=28532.28532.2	controllerType=0 controllerNumber=1 scan=28532	62.8592
35256:2	1	P.GYIN[+0.984]FS[+79.966]YEVLTPLK.W		N[+1], S[+80]	862.913	2	1724.82	1724.82	0	0	27	NRagged	658.64	582.07	546.77	10.31	1104	>sp|P02817|AMELX_BOVIN Amelogenin, X isoform OS=Bos taurus OX=9913 GN=AMELX PE=1 SV=2	1	hf1_eb_18273_84_20032023.ScanId;v=1;d1=28340.28340.2	controllerType=0 controllerNumber=1 scan=28340	62.5142
22966:1	1	G.YIN[+0.984]F.S		N[+1]	557.26	1	557.26	557.261	0	-1	28	Non	202.08	201.69	201.69	0.86	1104	>sp|P02817|AMELX_BOVIN Amelogenin, X isoform OS=Bos taurus OX=9913 GN=AMELX PE=1 SV=2	1	hf1_eb_18273_84_20032023.ScanId;v=1;d1=19812.19812.3	controllerType=0 controllerNumber=1 scan=19812	47.3219
23962:1	1	G.YIN[+0.984]F.S		N[+1]	557.26	1	557.26	557.261	0	-0.9	28	Non	211.36	204.8	204.8	0.86	1104	>sp|P02817|AMELX_BOVIN Amelogenin, X isoform OS=Bos taurus OX=9913 GN=AMELX PE=1 SV=2	1	hf1_eb_18273_84_20032023.ScanId;v=1;d1=20506.20506.3	controllerType=0 controllerNumber=1 scan=20506	48.5424
20563:1	1	G.YIN[+0.984]F.S		N[+1]	557.261	1	557.261	557.261	0	0.2	28	Non	234.29	224.48	224.48	1.19	1104	>sp|P02817|AMELX_BOVIN Amelogenin, X isoform OS=Bos taurus OX=9913 GN=AMELX PE=1 SV=2	1	hf1_eb_18273_84_20032023.ScanId;v=1;d1=18110.18110.4	controllerType=0 controllerNumber=1 scan=18110	44.2995
23247:1	1	G.YIN[+0.984]F.S		N[+1]	557.26	1	557.26	557.261	0	-0.7	28	Non	243.28	216.19	216.19	2.31	1104	>sp|P02817|AMELX_BOVIN Amelogenin, X isoform OS=Bos taurus OX=9913 GN=AMELX PE=1 SV=2	1	hf1_eb_18273_84_20032023.ScanId;v=1;d1=20005.20005.3	controllerType=0 controllerNumber=1 scan=20005	47.6624
18978:1	1	G.Y[+15.995]IN[+0.984]F.S		N[+1], Y[+16]	573.254	1	573.254	573.255	0	-2.9	28	Non	205.04	205.04	205.04	1.57	1104	>sp|P02817|AMELX_BOVIN Amelogenin, X isoform OS=Bos taurus OX=9913 GN=AMELX PE=1 SV=2	1	hf1_eb_18273_84_20032023.ScanId;v=1;d1=16940.16940.2	controllerType=0 controllerNumber=1 scan=16940	42.1482
18653:1	1	G.YIN[+0.984]FS[+79.966].Y		N[+1], S[+80]	724.259	1	724.259	724.259	0	-0.1	28	Non	201.12	120.16	120.16	1.39	1104	>sp|P02817|AMELX_BOVIN Amelogenin, X isoform OS=Bos taurus OX=9913 GN=AMELX PE=1 SV=2	1	hf1_eb_18273_84_20032023.ScanId;v=1;d1=16696.16696.2	controllerType=0 controllerNumber=1 scan=16696	41.7161
20075:1	1	G.YIN[+0.984]FS[+79.966].Y		N[+1], S[+80]	724.258	1	724.258	724.259	0	-1.2	28	Non	285.43	132.95	132.95	3.11	1104	>sp|P02817|AMELX_BOVIN Amelogenin, X isoform OS=Bos taurus OX=9913 GN=AMELX PE=1 SV=2	1	hf1_eb_18273_84_20032023.ScanId;v=1;d1=17759.17759.2	controllerType=0 controllerNumber=1 scan=17759	43.6684
22520:1	1	G.YIN[+0.984]FSY.E		N[+1]	807.357	1	807.357	807.356	0	0.9	28	Non	301.44	146.2	146.2	2.72	1104	>sp|P02817|AMELX_BOVIN Amelogenin, X isoform OS=Bos taurus OX=9913 GN=AMELX PE=1 SV=2	1	hf1_eb_18273_84_20032023.ScanId;v=1;d1=19500.19500.3	controllerType=0 controllerNumber=1 scan=19500	46.7614
23528:1	1	G.YIN[+0.984]FSY.E		N[+1]	807.355	1	807.355	807.356	0	-0.9	28	Non	371.3	117.52	117.52	2.8	1104	>sp|P02817|AMELX_BOVIN Amelogenin, X isoform OS=Bos taurus OX=9913 GN=AMELX PE=1 SV=2	1	hf1_eb_18273_84_20032023.ScanId;v=1;d1=20202.20202.2	controllerType=0 controllerNumber=1 scan=20202	48.0104
20568:1	1	G.YIN[+0.984]FSYE.V		N[+1]	936.399	1	936.399	936.399	0	0.1	28	Non	402.79	368.49	368.49	5.57	1104	>sp|P02817|AMELX_BOVIN Amelogenin, X isoform OS=Bos taurus OX=9913 GN=AMELX PE=1 SV=2	1	hf1_eb_18273_84_20032023.ScanId;v=1;d1=18113.18113.3	controllerType=0 controllerNumber=1 scan=18113	44.3041
28556:2	1	G.YINFSYEVL.T			574.287	2	1147.57	1147.57	0	-1	28	Non	259.88	141.1	141.1	2.39	1104	>sp|P02817|AMELX_BOVIN Amelogenin, X isoform OS=Bos taurus OX=9913 GN=AMELX PE=1 SV=2	1	hf1_eb_18273_84_20032023.ScanId;v=1;d1=23719.23719.2	controllerType=0 controllerNumber=1 scan=23719	54.2364
35258:2	1	G.YINFS[+79.966]YEVL.T		S[+80]	614.269	2	1227.53	1227.53	0	-1.6	28	Non	161.42	161.42	161.42	1.74	1104	>sp|P02817|AMELX_BOVIN Amelogenin, X isoform OS=Bos taurus OX=9913 GN=AMELX PE=1 SV=2	1	hf1_eb_18273_84_20032023.ScanId;v=1;d1=28342.28342.3	controllerType=0 controllerNumber=1 scan=28342	62.5164
34959:2	1	G.YINFS[+79.966]YEVL.T		S[+80]	614.27	2	1227.53	1227.53	0	0.2	28	Non	216.28	190.33	190.33	2.15	1104	>sp|P02817|AMELX_BOVIN Amelogenin, X isoform OS=Bos taurus OX=9913 GN=AMELX PE=1 SV=2	1	hf1_eb_18273_84_20032023.ScanId;v=1;d1=28143.28143.2	controllerType=0 controllerNumber=1 scan=28143	62.1673
33649:2	1	G.YIN[+0.984]FSYEVL.T		N[+1]	574.779	2	1148.55	1148.55	0	0.5	28	Non	357.35	357.35	357.35	4.05	1104	>sp|P02817|AMELX_BOVIN Amelogenin, X isoform OS=Bos taurus OX=9913 GN=AMELX PE=1 SV=2	1	hf1_eb_18273_84_20032023.ScanId;v=1;d1=27260.27260.2	controllerType=0 controllerNumber=1 scan=27260	60.5799
36069:2	1	G.YIN[+0.984]FS[+79.966]YEVL.T		N[+1], S[+80]	614.762	2	1228.52	1228.52	0	0.1	28	Non	184.45	184.45	184.45	1.36	1104	>sp|P02817|AMELX_BOVIN Amelogenin, X isoform OS=Bos taurus OX=9913 GN=AMELX PE=1 SV=2	1	hf1_eb_18273_84_20032023.ScanId;v=1;d1=28904.28904.2	controllerType=0 controllerNumber=1 scan=28904	63.523
33640:2	1	G.YIN[+0.984]FSYEVLTP.L		N[+1]	673.829	2	1346.65	1346.65	0	-0.1	28	Non	247.28	244.35	244.35	3.78	1104	>sp|P02817|AMELX_BOVIN Amelogenin, X isoform OS=Bos taurus OX=9913 GN=AMELX PE=1 SV=2	1	hf1_eb_18273_84_20032023.ScanId;v=1;d1=27252.27252.2	controllerType=0 controllerNumber=1 scan=27252	60.5656
33696:2	1	G.YIN[+0.984]FSYEVLTP.L		N[+1]	673.829	2	1346.65	1346.65	0	-0.2	28	Non	257.59	223.25	223.25	3.75	1104	>sp|P02817|AMELX_BOVIN Amelogenin, X isoform OS=Bos taurus OX=9913 GN=AMELX PE=1 SV=2	1	hf1_eb_18273_84_20032023.ScanId;v=1;d1=27292.27292.2	controllerType=0 controllerNumber=1 scan=27292	60.6367
34623:2	1	G.YINFS[+79.966]YEVLTP.L		S[+80]	713.321	2	1425.63	1425.63	0	0	28	Non	271.41	271.41	271.41	3.78	1104	>sp|P02817|AMELX_BOVIN Amelogenin, X isoform OS=Bos taurus OX=9913 GN=AMELX PE=1 SV=2	1	hf1_eb_18273_84_20032023.ScanId;v=1;d1=27913.27913.2	controllerType=0 controllerNumber=1 scan=27913	61.7483
35782:2	1	G.YIN[+0.984]FS[+79.966]YEVLTP.L		N[+1], S[+80]	713.813	2	1426.62	1426.62	0	1.3	28	Non	280.67	280.67	280.67	4.04	1104	>sp|P02817|AMELX_BOVIN Amelogenin, X isoform OS=Bos taurus OX=9913 GN=AMELX PE=1 SV=2	1	hf1_eb_18273_84_20032023.ScanId;v=1;d1=28716.28716.2	controllerType=0 controllerNumber=1 scan=28716	63.1879
34375:2	1	G.YINFSYEVLTPL.K			729.879	2	1458.75	1458.75	0	-0.3	28	Non	261.71	214.2	214.2	3.42	1104	>sp|P02817|AMELX_BOVIN Amelogenin, X isoform OS=Bos taurus OX=9913 GN=AMELX PE=1 SV=2	1	hf1_eb_18273_84_20032023.ScanId;v=1;d1=27748.27748.2	controllerType=0 controllerNumber=1 scan=27748	61.4589
36762:2	1	G.YINFS[+79.966]YEVLTPL.K		S[+80]	769.862	2	1538.72	1538.72	0	-0.2	28	Non	271.81	252.46	236.03	3.89	1104	>sp|P02817|AMELX_BOVIN Amelogenin, X isoform OS=Bos taurus OX=9913 GN=AMELX PE=1 SV=2	1	hf1_eb_18273_84_20032023.ScanId;v=1;d1=29377.29377.2	controllerType=0 controllerNumber=1 scan=29377	64.3158
36589:2	1	G.YIN[+0.984]FSYEVLTPL.K		N[+1]	730.371	2	1459.73	1459.74	0	-0.7	28	Non	514.23	429.25	429.25	6.08	1104	>sp|P02817|AMELX_BOVIN Amelogenin, X isoform OS=Bos taurus OX=9913 GN=AMELX PE=1 SV=2	1	hf1_eb_18273_84_20032023.ScanId;v=1;d1=29255.29255.2	controllerType=0 controllerNumber=1 scan=29255	64.1138
37053:2	1	G.YIN[+0.984]FS[+79.966]YEVLTPL.K		N[+1], S[+80]	770.354	2	1539.7	1539.7	0	-0.5	28	Non	282.56	243.39	243.39	4.24	1104	>sp|P02817|AMELX_BOVIN Amelogenin, X isoform OS=Bos taurus OX=9913 GN=AMELX PE=1 SV=2	1	hf1_eb_18273_84_20032023.ScanId;v=1;d1=29578.29578.2	controllerType=0 controllerNumber=1 scan=29578	64.6651
36714:2	1	G.YIN[+0.984]FS[+79.966]YEVLTPL.K		N[+1], S[+80]	770.355	2	1539.7	1539.7	0	0.8	28	Non	291.49	247.44	197.92	3.9	1104	>sp|P02817|AMELX_BOVIN Amelogenin, X isoform OS=Bos taurus OX=9913 GN=AMELX PE=1 SV=2	1	hf1_eb_18273_84_20032023.ScanId;v=1;d1=29346.29346.2	controllerType=0 controllerNumber=1 scan=29346	64.2638
29487:2	1	G.YINFSYEVLTPLK.W			793.934	2	1586.86	1586.85	0	8.9	28	NRagged	303.88	303.88	303.88	4.44	1104	>sp|P02817|AMELX_BOVIN Amelogenin, X isoform OS=Bos taurus OX=9913 GN=AMELX PE=1 SV=2	1	hf1_eb_18273_84_20032023.ScanId;v=1;d1=24356.24356.2	controllerType=0 controllerNumber=1 scan=24356	55.3611
26910:2	1	G.YINFSYEVLTPLK.W			793.927	2	1586.85	1586.85	0	0.2	28	NRagged	341.18	341.18	341.18	6.07	1104	>sp|P02817|AMELX_BOVIN Amelogenin, X isoform OS=Bos taurus OX=9913 GN=AMELX PE=1 SV=2	1	hf1_eb_18273_84_20032023.ScanId;v=1;d1=22581.22581.2	controllerType=0 controllerNumber=1 scan=22581	52.2428
30969:2	1	G.YINFSYEVLTPLK.W			793.928	2	1586.85	1586.85	0	0.9	28	NRagged	400.09	344.51	344.51	5.79	1104	>sp|P02817|AMELX_BOVIN Amelogenin, X isoform OS=Bos taurus OX=9913 GN=AMELX PE=1 SV=2	1	hf1_eb_18273_84_20032023.ScanId;v=1;d1=25415.25415.2	controllerType=0 controllerNumber=1 scan=25415	57.2548
27776:3	1	G.YINFSYEVLTPLK.W			529.62	3	1586.85	1586.85	0	-0.9	28	NRagged	438.89	340.09	340.09	5.95	1104	>sp|P02817|AMELX_BOVIN Amelogenin, X isoform OS=Bos taurus OX=9913 GN=AMELX PE=1 SV=2	1	hf1_eb_18273_84_20032023.ScanId;v=1;d1=23176.23176.3	controllerType=0 controllerNumber=1 scan=23176	53.2865
26886:3	1	G.YINFSYEVLTPLK.W			529.62	3	1586.85	1586.85	0	-0.1	28	NRagged	461.18	331.47	331.47	5.98	1104	>sp|P02817|AMELX_BOVIN Amelogenin, X isoform OS=Bos taurus OX=9913 GN=AMELX PE=1 SV=2	1	hf1_eb_18273_84_20032023.ScanId;v=1;d1=22567.22567.3	controllerType=0 controllerNumber=1 scan=22567	52.2192
27177:3	1	G.YINFSYEVLTPLK.W			529.62	3	1586.84	1586.85	0	-1	28	NRagged	475.15	330.96	330.96	6.45	1104	>sp|P02817|AMELX_BOVIN Amelogenin, X isoform OS=Bos taurus OX=9913 GN=AMELX PE=1 SV=2	1	hf1_eb_18273_84_20032023.ScanId;v=1;d1=22768.22768.3	controllerType=0 controllerNumber=1 scan=22768	52.5779
34458:2	1	G.YIN[+0.984]FSYEVLTPLK.W		N[+1]	794.417	2	1587.83	1587.83	0	-2.8	28	NRagged	131.16	131.16	131.16	1.45	1104	>sp|P02817|AMELX_BOVIN Amelogenin, X isoform OS=Bos taurus OX=9913 GN=AMELX PE=1 SV=2	1	hf1_eb_18273_84_20032023.ScanId;v=1;d1=27803.27803.2	controllerType=0 controllerNumber=1 scan=27803	61.5552
31342:2	1	G.YIN[+0.984]FSYEVLTPLK.W		N[+1]	794.418	2	1587.83	1587.83	0	-1	28	NRagged	175.45	175.45	175.45	3.44	1104	>sp|P02817|AMELX_BOVIN Amelogenin, X isoform OS=Bos taurus OX=9913 GN=AMELX PE=1 SV=2	1	hf1_eb_18273_84_20032023.ScanId;v=1;d1=25672.25672.3	controllerType=0 controllerNumber=1 scan=25672	57.7111
32644:2	1	G.YINFS[+79.966]YEVLTPLK.W		S[+80]	833.91	2	1666.81	1666.81	0	-0.2	28	NRagged	241.97	241.97	129.64	5.29	1104	>sp|P02817|AMELX_BOVIN Amelogenin, X isoform OS=Bos taurus OX=9913 GN=AMELX PE=1 SV=2	1	hf1_eb_18273_84_20032023.ScanId;v=1;d1=26582.26582.2	controllerType=0 controllerNumber=1 scan=26582	59.3652
31979:3	1	G.YIN[+0.984]FSYEVLTPLK.W		N[+1]	529.948	3	1587.83	1587.83	0	0.4	28	NRagged	251.02	251.02	251.02	4.99	1104	>sp|P02817|AMELX_BOVIN Amelogenin, X isoform OS=Bos taurus OX=9913 GN=AMELX PE=1 SV=2	1	hf1_eb_18273_84_20032023.ScanId;v=1;d1=26124.26124.3	controllerType=0 controllerNumber=1 scan=26124	58.5344
30423:2	1	G.YIN[+0.984]FSYEVLTPLK.W		N[+1]	794.416	2	1587.82	1587.83	0	-3.5	28	NRagged	312.09	273.19	273.19	4.71	1104	>sp|P02817|AMELX_BOVIN Amelogenin, X isoform OS=Bos taurus OX=9913 GN=AMELX PE=1 SV=2	1	hf1_eb_18273_84_20032023.ScanId;v=1;d1=25045.25045.2	controllerType=0 controllerNumber=1 scan=25045	56.6026
32636:2	1	G.YIN[+0.984]FSYEVLTPLK.W		N[+1]	794.419	2	1587.83	1587.83	0	-0.2	28	NRagged	313.32	313.32	313.32	5.89	1104	>sp|P02817|AMELX_BOVIN Amelogenin, X isoform OS=Bos taurus OX=9913 GN=AMELX PE=1 SV=2	1	hf1_eb_18273_84_20032023.ScanId;v=1;d1=26576.26576.3	controllerType=0 controllerNumber=1 scan=26576	59.3533
32017:2	1	G.YINFS[+79.966]YEVLTPLK.W		S[+80]	833.909	2	1666.81	1666.81	0	-1.5	28	NRagged	328.99	328.99	240.25	6	1104	>sp|P02817|AMELX_BOVIN Amelogenin, X isoform OS=Bos taurus OX=9913 GN=AMELX PE=1 SV=2	1	hf1_eb_18273_84_20032023.ScanId;v=1;d1=26152.26152.2	controllerType=0 controllerNumber=1 scan=26152	58.5903
33343:2	1	G.YIN[+0.984]FSYEVLTPLK.W		N[+1]	794.418	2	1587.83	1587.83	0	-1.5	28	NRagged	337.72	337.72	337.72	5.85	1104	>sp|P02817|AMELX_BOVIN Amelogenin, X isoform OS=Bos taurus OX=9913 GN=AMELX PE=1 SV=2	1	hf1_eb_18273_84_20032023.ScanId;v=1;d1=27053.27053.2	controllerType=0 controllerNumber=1 scan=27053	60.2099
30785:2	1	G.YIN[+0.984]FSYEVLTPLK.W		N[+1]	794.419	2	1587.83	1587.83	0	-0.1	28	NRagged	388.15	388.15	388.15	6.9	1104	>sp|P02817|AMELX_BOVIN Amelogenin, X isoform OS=Bos taurus OX=9913 GN=AMELX PE=1 SV=2	1	hf1_eb_18273_84_20032023.ScanId;v=1;d1=25291.25291.2	controllerType=0 controllerNumber=1 scan=25291	57.0352
32357:2	1	G.YIN[+0.984]FSYEVLTPLK.W		N[+1]	794.419	2	1587.83	1587.83	0	0	28	NRagged	429.56	429.56	429.56	7.13	1104	>sp|P02817|AMELX_BOVIN Amelogenin, X isoform OS=Bos taurus OX=9913 GN=AMELX PE=1 SV=2	1	hf1_eb_18273_84_20032023.ScanId;v=1;d1=26381.26381.2	controllerType=0 controllerNumber=1 scan=26381	59.0007
33657:2	1	G.YINFS[+79.966]YEVLTPLK.W		S[+80]	833.91	2	1666.81	1666.81	0	-0.5	28	NRagged	456.64	456.64	360.94	7.63	1104	>sp|P02817|AMELX_BOVIN Amelogenin, X isoform OS=Bos taurus OX=9913 GN=AMELX PE=1 SV=2	1	hf1_eb_18273_84_20032023.ScanId;v=1;d1=27264.27264.2	controllerType=0 controllerNumber=1 scan=27264	60.5859
34168:2	1	G.YIN[+0.984]FSYEVLTPLK.W		N[+1]	794.418	2	1587.83	1587.83	0	-0.8	28	NRagged	457.12	457.12	457.12	7.63	1104	>sp|P02817|AMELX_BOVIN Amelogenin, X isoform OS=Bos taurus OX=9913 GN=AMELX PE=1 SV=2	1	hf1_eb_18273_84_20032023.ScanId;v=1;d1=27611.27611.2	controllerType=0 controllerNumber=1 scan=27611	61.216
31796:2	1	G.YIN[+0.984]FSYEVLTPLK.W		N[+1]	794.419	2	1587.83	1587.83	0	-0.2	28	NRagged	460.26	404.06	404.06	7.16	1104	>sp|P02817|AMELX_BOVIN Amelogenin, X isoform OS=Bos taurus OX=9913 GN=AMELX PE=1 SV=2	1	hf1_eb_18273_84_20032023.ScanId;v=1;d1=25997.25997.2	controllerType=0 controllerNumber=1 scan=25997	58.3014
32069:2	1	G.YIN[+0.984]FSYEVLTPLK.W		N[+1]	794.419	2	1587.83	1587.83	0	0	28	NRagged	540.3	470.44	470.44	7.64	1104	>sp|P02817|AMELX_BOVIN Amelogenin, X isoform OS=Bos taurus OX=9913 GN=AMELX PE=1 SV=2	1	hf1_eb_18273_84_20032023.ScanId;v=1;d1=26185.26185.2	controllerType=0 controllerNumber=1 scan=26185	58.6503
31257:2	1	G.YIN[+0.984]FSYEVLTPLK.W		N[+1]	794.418	2	1587.83	1587.83	0	-1.3	28	NRagged	540.79	450.52	450.52	7.64	1104	>sp|P02817|AMELX_BOVIN Amelogenin, X isoform OS=Bos taurus OX=9913 GN=AMELX PE=1 SV=2	1	hf1_eb_18273_84_20032023.ScanId;v=1;d1=25618.25618.2	controllerType=0 controllerNumber=1 scan=25618	57.6162
31547:2	1	G.YIN[+0.984]FSYEVLTPLK.W		N[+1]	794.418	2	1587.83	1587.83	0	-0.8	28	NRagged	564.82	560.4	560.4	8.31	1104	>sp|P02817|AMELX_BOVIN Amelogenin, X isoform OS=Bos taurus OX=9913 GN=AMELX PE=1 SV=2	1	hf1_eb_18273_84_20032023.ScanId;v=1;d1=25814.25814.2	controllerType=0 controllerNumber=1 scan=25814	57.9641
35606:2	1	G.YINFS[+79.966]YEVLTPLK.W		S[+80]	833.91	2	1666.81	1666.81	0	0.5	28	NRagged	596.64	513.82	472.09	7.97	1104	>sp|P02817|AMELX_BOVIN Amelogenin, X isoform OS=Bos taurus OX=9913 GN=AMELX PE=1 SV=2	1	hf1_eb_18273_84_20032023.ScanId;v=1;d1=28588.28588.2	controllerType=0 controllerNumber=1 scan=28588	62.9604
33361:2	1	G.YINFS[+79.966]YEVLTPLK.W		S[+80]	833.911	2	1666.82	1666.81	0	1.3	28	NRagged	603.99	528.53	471.27	8.97	1104	>sp|P02817|AMELX_BOVIN Amelogenin, X isoform OS=Bos taurus OX=9913 GN=AMELX PE=1 SV=2	1	hf1_eb_18273_84_20032023.ScanId;v=1;d1=27064.27064.2	controllerType=0 controllerNumber=1 scan=27064	60.2293
34287:3	1	G.YIN[+0.984]FS[+79.966]YEVLTPLK.W		N[+1], S[+80]	556.603	3	1667.79	1667.8	0	-1.3	28	NRagged	255.65	255.65	153.41	4.99	1104	>sp|P02817|AMELX_BOVIN Amelogenin, X isoform OS=Bos taurus OX=9913 GN=AMELX PE=1 SV=2	1	hf1_eb_18273_84_20032023.ScanId;v=1;d1=27687.27687.3	controllerType=0 controllerNumber=1 scan=27687	61.3501
33077:2	1	G.YIN[+0.984]FS[+79.966]YEVLTPLK.W		N[+1], S[+80]	834.403	2	1667.8	1667.8	0	0.5	28	NRagged	321.07	321.07	169.71	5.56	1104	>sp|P02817|AMELX_BOVIN Amelogenin, X isoform OS=Bos taurus OX=9913 GN=AMELX PE=1 SV=2	1	hf1_eb_18273_84_20032023.ScanId;v=1;d1=26875.26875.2	controllerType=0 controllerNumber=1 scan=26875	59.8858
32018:2	1	G.YIN[+0.984]FS[+79.966]YEVLTPLK.W		N[+1], S[+80]	834.403	2	1667.8	1667.8	0	1.2	28	NRagged	363.04	363.04	265.54	6.5	1104	>sp|P02817|AMELX_BOVIN Amelogenin, X isoform OS=Bos taurus OX=9913 GN=AMELX PE=1 SV=2	1	hf1_eb_18273_84_20032023.ScanId;v=1;d1=26152.26152.2	controllerType=0 controllerNumber=1 scan=26152	58.5903
32311:2	1	G.YIN[+0.984]FS[+79.966]YEVLTPLK.W		N[+1], S[+80]	834.402	2	1667.8	1667.8	0	-0.2	28	NRagged	366.37	366.37	238.25	6.84	1104	>sp|P02817|AMELX_BOVIN Amelogenin, X isoform OS=Bos taurus OX=9913 GN=AMELX PE=1 SV=2	1	hf1_eb_18273_84_20032023.ScanId;v=1;d1=26347.26347.2	controllerType=0 controllerNumber=1 scan=26347	58.9392
36057:2	1	G.YIN[+0.984]FS[+79.966]YEVLTPLK.W		N[+1], S[+80]	834.401	2	1667.79	1667.8	0	-1.3	28	NRagged	391.4	391.4	308.32	6.84	1104	>sp|P02817|AMELX_BOVIN Amelogenin, X isoform OS=Bos taurus OX=9913 GN=AMELX PE=1 SV=2	1	hf1_eb_18273_84_20032023.ScanId;v=1;d1=28894.28894.2	controllerType=0 controllerNumber=1 scan=28894	63.5052
35089:2	1	G.YIN[+0.984]FS[+79.966]YEVLTPLK.W		N[+1], S[+80]	834.401	2	1667.8	1667.8	0	-0.7	28	NRagged	410.57	410.57	324.88	6.91	1104	>sp|P02817|AMELX_BOVIN Amelogenin, X isoform OS=Bos taurus OX=9913 GN=AMELX PE=1 SV=2	1	hf1_eb_18273_84_20032023.ScanId;v=1;d1=28232.28232.2	controllerType=0 controllerNumber=1 scan=28232	62.3236
35384:2	1	G.YIN[+0.984]FS[+79.966]YEVLTPLK.W		N[+1], S[+80]	834.402	2	1667.8	1667.8	0	0.3	28	NRagged	487.92	460.65	404.25	7.6	1104	>sp|P02817|AMELX_BOVIN Amelogenin, X isoform OS=Bos taurus OX=9913 GN=AMELX PE=1 SV=2	1	hf1_eb_18273_84_20032023.ScanId;v=1;d1=28431.28431.2	controllerType=0 controllerNumber=1 scan=28431	62.676
34805:2	1	G.YIN[+0.984]FS[+79.966]YEVLTPLK.W		N[+1], S[+80]	834.402	2	1667.8	1667.8	0	-0.2	28	NRagged	571.74	571.74	449.97	8.31	1104	>sp|P02817|AMELX_BOVIN Amelogenin, X isoform OS=Bos taurus OX=9913 GN=AMELX PE=1 SV=2	1	hf1_eb_18273_84_20032023.ScanId;v=1;d1=28038.28038.2	controllerType=0 controllerNumber=1 scan=28038	61.9754
34522:2	1	G.YIN[+0.984]FS[+79.966]YEVLTPLK.W		N[+1], S[+80]	834.402	2	1667.8	1667.8	0	-0.5	28	NRagged	589.85	563.77	466.72	8.31	1104	>sp|P02817|AMELX_BOVIN Amelogenin, X isoform OS=Bos taurus OX=9913 GN=AMELX PE=1 SV=2	1	hf1_eb_18273_84_20032023.ScanId;v=1;d1=27846.27846.2	controllerType=0 controllerNumber=1 scan=27846	61.6307
33936:2	1	G.YIN[+0.984]FS[+79.966]YEVLTPLK.W		N[+1], S[+80]	834.403	2	1667.8	1667.8	0	0.5	28	NRagged	615.68	561.31	489.49	8.97	1104	>sp|P02817|AMELX_BOVIN Amelogenin, X isoform OS=Bos taurus OX=9913 GN=AMELX PE=1 SV=2	1	hf1_eb_18273_84_20032023.ScanId;v=1;d1=27455.27455.2	controllerType=0 controllerNumber=1 scan=27455	60.9359
34228:2	1	G.YIN[+0.984]FS[+79.966]YEVLTPLK.W		N[+1], S[+80]	834.403	2	1667.8	1667.8	0	0.5	28	NRagged	638.8	561.97	523.22	8.97	1104	>sp|P02817|AMELX_BOVIN Amelogenin, X isoform OS=Bos taurus OX=9913 GN=AMELX PE=1 SV=2	1	hf1_eb_18273_84_20032023.ScanId;v=1;d1=27648.27648.2	controllerType=0 controllerNumber=1 scan=27648	61.283
36682:2	1	G.YINFS[+79.966]YEVLTPLKW.Y		S[+80]	926.944	2	1852.88	1852.89	0	-5.7	28	Non	247.67	105.88	105.88	2.37	1104	>sp|P02817|AMELX_BOVIN Amelogenin, X isoform OS=Bos taurus OX=9913 GN=AMELX PE=1 SV=2	1	hf1_eb_18273_84_20032023.ScanId;v=1;d1=29323.29323.2	controllerType=0 controllerNumber=1 scan=29323	64.2243
35614:2	1	G.YINFS[+79.966]YEVLTPLKW[+31.990].Y		S[+80], W[+32]	942.944	2	1884.88	1884.88	0	-0.2	28	Non	123.25	123.25	37	2.36	1104	>sp|P02817|AMELX_BOVIN Amelogenin, X isoform OS=Bos taurus OX=9913 GN=AMELX PE=1 SV=2	1	hf1_eb_18273_84_20032023.ScanId;v=1;d1=28592.28592.2	controllerType=0 controllerNumber=1 scan=28592	62.9665
36683:2	1	G.YIN[+0.984]FS[+79.966]YEVLTPLKW.Y		N[+1], S[+80]	927.442	2	1853.88	1853.88	0	-0.2	28	Non	445.09	135.07	135.07	4.83	1104	>sp|P02817|AMELX_BOVIN Amelogenin, X isoform OS=Bos taurus OX=9913 GN=AMELX PE=1 SV=2	1	hf1_eb_18273_84_20032023.ScanId;v=1;d1=29323.29323.2	controllerType=0 controllerNumber=1 scan=29323	64.2243
36751:2	1	G.YIN[+0.984]FS[+79.966]YEVLTPLKWY.Q		N[+1], S[+80]	1008.97	2	2016.94	2016.94	0	0.2	28	Non	331.74	331.74	253.67	5.99	1104	>sp|P02817|AMELX_BOVIN Amelogenin, X isoform OS=Bos taurus OX=9913 GN=AMELX PE=1 SV=2	1	hf1_eb_18273_84_20032023.ScanId;v=1;d1=29369.29369.2	controllerType=0 controllerNumber=1 scan=29369	64.3023
34817:3	1	G.YINFSYEVLTPLKWYQ[+0.984].S		Q[+1]	689.015	3	2065.03	2065.03	0	0.2	28	Non	80.52	80.52	80.52	1.98	1104	>sp|P02817|AMELX_BOVIN Amelogenin, X isoform OS=Bos taurus OX=9913 GN=AMELX PE=1 SV=2	1	hf1_eb_18273_84_20032023.ScanId;v=1;d1=28046.28046.3	controllerType=0 controllerNumber=1 scan=28046	61.9874
36500:2	1	G.YIN[+0.984]FSYEVLTPLKWYQ[+0.984].S		N[+1], Q[+1]	1033.51	2	2066.02	2066.02	0	1.7	28	Non	570.91	410.18	410.18	8.26	1104	>sp|P02817|AMELX_BOVIN Amelogenin, X isoform OS=Bos taurus OX=9913 GN=AMELX PE=1 SV=2	1	hf1_eb_18273_84_20032023.ScanId;v=1;d1=29191.29191.2	controllerType=0 controllerNumber=1 scan=29191	64.0086
36693:2	1	G.YIN[+0.984]FS[+79.966]YEVLTPLKWYQ[+0.984].S		N[+1], Q[+1], S[+80]	1073.5	2	2145.98	2145.98	0	0.5	28	Non	529.73	444.18	444.18	7.59	1104	>sp|P02817|AMELX_BOVIN Amelogenin, X isoform OS=Bos taurus OX=9913 GN=AMELX PE=1 SV=2	1	hf1_eb_18273_84_20032023.ScanId;v=1;d1=29331.29331.2	controllerType=0 controllerNumber=1 scan=29331	64.239
36655:2	1	G.YIN[+0.984]FS[+79.966]YEVLTPLKWYQ[+0.984]S.M		N[+1], Q[+1], S[+80]	1117.01	2	2233.02	2233.01	0	1.2	28	Non	335.35	335.35	214.46	6.01	1104	>sp|P02817|AMELX_BOVIN Amelogenin, X isoform OS=Bos taurus OX=9913 GN=AMELX PE=1 SV=2	1	hf1_eb_18273_84_20032023.ScanId;v=1;d1=29304.29304.2	controllerType=0 controllerNumber=1 scan=29304	64.193
36650:2	1	G.YINFS[+79.966]YEVLTPLKWYQ[+0.984]SM[+15.995].I		M[+16], Q[+1], S[+80]	1190.03	2	2379.05	2379.07	0	-6.1	28	Non	234.63	234.63	44.55	3.11	1104	>sp|P02817|AMELX_BOVIN Amelogenin, X isoform OS=Bos taurus OX=9913 GN=AMELX PE=1 SV=2	1	hf1_eb_18273_84_20032023.ScanId;v=1;d1=29301.29301.2	controllerType=0 controllerNumber=1 scan=29301	64.1884
14231:1	1	Y.IN[+0.984]FS[+79.966].Y		N[+1], S[+80]	561.196	1	561.196	561.196	0	0.2	29	Non	201.39	162.29	162.29	2.37	1104	>sp|P02817|AMELX_BOVIN Amelogenin, X isoform OS=Bos taurus OX=9913 GN=AMELX PE=1 SV=2	1	hf1_eb_18273_84_20032023.ScanId;v=1;d1=13465.13465.2	controllerType=0 controllerNumber=1 scan=13465	35.922
14056:1	1	Y.IN[+0.984]FS[+79.966].Y		N[+1], S[+80]	561.195	1	561.195	561.196	0	-1.4	29	Non	216.29	201.43	201.43	2.75	1104	>sp|P02817|AMELX_BOVIN Amelogenin, X isoform OS=Bos taurus OX=9913 GN=AMELX PE=1 SV=2	1	hf1_eb_18273_84_20032023.ScanId;v=1;d1=13331.13331.2	controllerType=0 controllerNumber=1 scan=13331	35.673
19665:1	1	Y.INFS[+79.966]YE.V		S[+80]	852.315	1	852.315	852.317	0	-2.9	29	Non	280.58	238.95	238.95	3.81	1104	>sp|P02817|AMELX_BOVIN Amelogenin, X isoform OS=Bos taurus OX=9913 GN=AMELX PE=1 SV=2	1	hf1_eb_18273_84_20032023.ScanId;v=1;d1=17437.17437.4	controllerType=0 controllerNumber=1 scan=17437	43.0518
18375:1	1	Y.IN[+0.984]FSYE.V		N[+1]	773.335	1	773.335	773.335	0	-0.5	29	Non	295.56	215.73	215.73	3.11	1104	>sp|P02817|AMELX_BOVIN Amelogenin, X isoform OS=Bos taurus OX=9913 GN=AMELX PE=1 SV=2	1	hf1_eb_18273_84_20032023.ScanId;v=1;d1=16492.16492.2	controllerType=0 controllerNumber=1 scan=16492	41.3492
26092:2	1	Y.INFSYEVL.T			492.755	2	984.503	984.504	0	-0.6	29	Non	204.86	161.74	161.74	1.36	1104	>sp|P02817|AMELX_BOVIN Amelogenin, X isoform OS=Bos taurus OX=9913 GN=AMELX PE=1 SV=2	1	hf1_eb_18273_84_20032023.ScanId;v=1;d1=22028.22028.2	controllerType=0 controllerNumber=1 scan=22028	51.2609
25810:2	1	Y.INFSYEVL.T			492.754	2	984.501	984.504	0	-2.8	29	Non	211.81	142.61	142.61	0.77	1104	>sp|P02817|AMELX_BOVIN Amelogenin, X isoform OS=Bos taurus OX=9913 GN=AMELX PE=1 SV=2	1	hf1_eb_18273_84_20032023.ScanId;v=1;d1=21832.21832.2	controllerType=0 controllerNumber=1 scan=21832	50.912
27469:2	1	Y.INFSYEVL.T			492.755	2	984.503	984.504	0	-0.7	29	Non	212.93	171.53	171.53	1.36	1104	>sp|P02817|AMELX_BOVIN Amelogenin, X isoform OS=Bos taurus OX=9913 GN=AMELX PE=1 SV=2	1	hf1_eb_18273_84_20032023.ScanId;v=1;d1=22964.22964.2	controllerType=0 controllerNumber=1 scan=22964	52.9187
26629:2	1	Y.INFSYEVL.T			492.755	2	984.502	984.504	0	-1.6	29	Non	236.09	142.86	142.86	1.12	1104	>sp|P02817|AMELX_BOVIN Amelogenin, X isoform OS=Bos taurus OX=9913 GN=AMELX PE=1 SV=2	1	hf1_eb_18273_84_20032023.ScanId;v=1;d1=22384.22384.2	controllerType=0 controllerNumber=1 scan=22384	51.8948
33710:2	1	Y.IN[+0.984]FS[+79.966]YEVL.T		N[+1], S[+80]	533.231	2	1065.45	1065.45	0	0.5	29	Non	191	191	191	2.15	1104	>sp|P02817|AMELX_BOVIN Amelogenin, X isoform OS=Bos taurus OX=9913 GN=AMELX PE=1 SV=2	1	hf1_eb_18273_84_20032023.ScanId;v=1;d1=27303.27303.2	controllerType=0 controllerNumber=1 scan=27303	60.6561
34095:1	1	Y.IN[+0.984]FS[+79.966]YEVL.T		N[+1], S[+80]	1065.46	1	1065.46	1065.45	0	1.9	29	Non	239.89	190.65	190.65	2.43	1104	>sp|P02817|AMELX_BOVIN Amelogenin, X isoform OS=Bos taurus OX=9913 GN=AMELX PE=1 SV=2	1	hf1_eb_18273_84_20032023.ScanId;v=1;d1=27563.27563.2	controllerType=0 controllerNumber=1 scan=27563	61.1266
33415:2	1	Y.IN[+0.984]FS[+79.966]YEVLTP.L		N[+1], S[+80]	632.281	2	1263.56	1263.55	0	0.7	29	Non	237.25	94.78	94.78	1.16	1104	>sp|P02817|AMELX_BOVIN Amelogenin, X isoform OS=Bos taurus OX=9913 GN=AMELX PE=1 SV=2	1	hf1_eb_18273_84_20032023.ScanId;v=1;d1=27102.27102.2	controllerType=0 controllerNumber=1 scan=27102	60.2972
31943:2	1	Y.INFSYEVLTPL.K			648.348	2	1295.69	1295.69	0	0.1	29	Non	291.67	261.17	261.17	4.13	1104	>sp|P02817|AMELX_BOVIN Amelogenin, X isoform OS=Bos taurus OX=9913 GN=AMELX PE=1 SV=2	1	hf1_eb_18273_84_20032023.ScanId;v=1;d1=26101.26101.3	controllerType=0 controllerNumber=1 scan=26101	58.4915
32788:2	1	Y.INFSYEVLTPL.K			648.346	2	1295.69	1295.69	0	-2	29	Non	325.44	325.44	325.44	4.28	1104	>sp|P02817|AMELX_BOVIN Amelogenin, X isoform OS=Bos taurus OX=9913 GN=AMELX PE=1 SV=2	1	hf1_eb_18273_84_20032023.ScanId;v=1;d1=26679.26679.2	controllerType=0 controllerNumber=1 scan=26679	59.5367
36605:2	1	Y.INFS[+79.966]YEVLTPL.K		S[+80]	688.33	2	1375.65	1375.65	0	-1.2	29	Non	246.55	180.86	180.86	3.36	1104	>sp|P02817|AMELX_BOVIN Amelogenin, X isoform OS=Bos taurus OX=9913 GN=AMELX PE=1 SV=2	1	hf1_eb_18273_84_20032023.ScanId;v=1;d1=29268.29268.2	controllerType=0 controllerNumber=1 scan=29268	64.134
36895:2	1	Y.IN[+0.984]FS[+79.966]YEVLTPL.K		N[+1], S[+80]	688.822	2	1376.64	1376.64	0	-1.1	29	Non	175.36	173.26	173.26	2.23	1104	>sp|P02817|AMELX_BOVIN Amelogenin, X isoform OS=Bos taurus OX=9913 GN=AMELX PE=1 SV=2	1	hf1_eb_18273_84_20032023.ScanId;v=1;d1=29471.29471.2	controllerType=0 controllerNumber=1 scan=29471	64.4771
26020:3	1	Y.INFSYEVLTPLK.W			475.266	3	1423.78	1423.78	0	-0.5	29	NRagged	254.65	254.65	254.65	4.68	1104	>sp|P02817|AMELX_BOVIN Amelogenin, X isoform OS=Bos taurus OX=9913 GN=AMELX PE=1 SV=2	1	hf1_eb_18273_84_20032023.ScanId;v=1;d1=21975.21975.3	controllerType=0 controllerNumber=1 scan=21975	51.1659
27925:2	1	Y.INFSYEVLTPLK.W			712.394	2	1423.78	1423.78	0	-1.6	29	NRagged	264.33	244.07	244.07	4.87	1104	>sp|P02817|AMELX_BOVIN Amelogenin, X isoform OS=Bos taurus OX=9913 GN=AMELX PE=1 SV=2	1	hf1_eb_18273_84_20032023.ScanId;v=1;d1=23279.23279.3	controllerType=0 controllerNumber=1 scan=23279	53.4606
28858:2	1	Y.INFSYEVLTPLK.W			712.395	2	1423.78	1423.78	0	-0.8	29	NRagged	265.68	231.39	231.39	5.15	1104	>sp|P02817|AMELX_BOVIN Amelogenin, X isoform OS=Bos taurus OX=9913 GN=AMELX PE=1 SV=2	1	hf1_eb_18273_84_20032023.ScanId;v=1;d1=23928.23928.2	controllerType=0 controllerNumber=1 scan=23928	54.6027
25335:3	1	Y.INFSYEVLTPLK.W			475.265	3	1423.78	1423.78	0	-1.1	29	NRagged	367.56	249.78	249.78	5.21	1104	>sp|P02817|AMELX_BOVIN Amelogenin, X isoform OS=Bos taurus OX=9913 GN=AMELX PE=1 SV=2	1	hf1_eb_18273_84_20032023.ScanId;v=1;d1=21483.21483.3	controllerType=0 controllerNumber=1 scan=21483	50.277
24928:3	1	Y.INFSYEVLTPLK.W			475.265	3	1423.78	1423.78	0	-1	29	NRagged	374.05	345.95	345.95	5.73	1104	>sp|P02817|AMELX_BOVIN Amelogenin, X isoform OS=Bos taurus OX=9913 GN=AMELX PE=1 SV=2	1	hf1_eb_18273_84_20032023.ScanId;v=1;d1=21192.21192.3	controllerType=0 controllerNumber=1 scan=21192	49.7586
30410:2	1	Y.IN[+0.984]FSYEVLTPLK.W		N[+1]	712.887	2	1424.77	1424.77	0	-0.5	29	NRagged	288.75	288.75	288.75	5.58	1104	>sp|P02817|AMELX_BOVIN Amelogenin, X isoform OS=Bos taurus OX=9913 GN=AMELX PE=1 SV=2	1	hf1_eb_18273_84_20032023.ScanId;v=1;d1=25036.25036.3	controllerType=0 controllerNumber=1 scan=25036	56.5863
31932:2	1	Y.INFS[+79.966]YEVLTPLK.W		S[+80]	752.378	2	1503.75	1503.75	0	-0.8	29	NRagged	300.43	300.43	300.43	5.58	1104	>sp|P02817|AMELX_BOVIN Amelogenin, X isoform OS=Bos taurus OX=9913 GN=AMELX PE=1 SV=2	1	hf1_eb_18273_84_20032023.ScanId;v=1;d1=26093.26093.4	controllerType=0 controllerNumber=1 scan=26093	58.4766
30435:2	1	Y.IN[+0.984]FSYEVLTPLK.W		N[+1]	712.887	2	1424.77	1424.77	0	-0.9	29	NRagged	362.98	326.26	326.26	6.14	1104	>sp|P02817|AMELX_BOVIN Amelogenin, X isoform OS=Bos taurus OX=9913 GN=AMELX PE=1 SV=2	1	hf1_eb_18273_84_20032023.ScanId;v=1;d1=25054.25054.2	controllerType=0 controllerNumber=1 scan=25054	56.6189
29577:2	1	Y.IN[+0.984]FSYEVLTPLK.W		N[+1]	712.886	2	1424.76	1424.77	0	-2	29	NRagged	459.34	340.24	340.24	5.97	1104	>sp|P02817|AMELX_BOVIN Amelogenin, X isoform OS=Bos taurus OX=9913 GN=AMELX PE=1 SV=2	1	hf1_eb_18273_84_20032023.ScanId;v=1;d1=24423.24423.2	controllerType=0 controllerNumber=1 scan=24423	55.4826
29298:2	1	Y.IN[+0.984]FSYEVLTPLK.W		N[+1]	712.887	2	1424.77	1424.77	0	-0.9	29	NRagged	495.24	415.4	415.4	7.39	1104	>sp|P02817|AMELX_BOVIN Amelogenin, X isoform OS=Bos taurus OX=9913 GN=AMELX PE=1 SV=2	1	hf1_eb_18273_84_20032023.ScanId;v=1;d1=24228.24228.2	controllerType=0 controllerNumber=1 scan=24228	55.1405
29990:2	1	Y.IN[+0.984]FSYEVLTPLK.W		N[+1]	712.887	2	1424.77	1424.77	0	0.1	29	NRagged	523.43	472.38	472.38	7.44	1104	>sp|P02817|AMELX_BOVIN Amelogenin, X isoform OS=Bos taurus OX=9913 GN=AMELX PE=1 SV=2	1	hf1_eb_18273_84_20032023.ScanId;v=1;d1=24727.24727.2	controllerType=0 controllerNumber=1 scan=24727	56.0249
31221:2	1	Y.INFS[+79.966]YEVLTPLK.W		S[+80]	752.377	2	1503.75	1503.75	0	-1.6	29	NRagged	541.04	484.94	484.94	7.22	1104	>sp|P02817|AMELX_BOVIN Amelogenin, X isoform OS=Bos taurus OX=9913 GN=AMELX PE=1 SV=2	1	hf1_eb_18273_84_20032023.ScanId;v=1;d1=25592.25592.2	controllerType=0 controllerNumber=1 scan=25592	57.5717
29863:2	1	Y.IN[+0.984]FSYEVLTPLK.W		N[+1]	712.886	2	1424.76	1424.77	0	-1.6	29	NRagged	586.6	457.72	457.72	7.89	1104	>sp|P02817|AMELX_BOVIN Amelogenin, X isoform OS=Bos taurus OX=9913 GN=AMELX PE=1 SV=2	1	hf1_eb_18273_84_20032023.ScanId;v=1;d1=24623.24623.2	controllerType=0 controllerNumber=1 scan=24623	55.8367
35608:2	1	Y.IN[+0.984]FS[+79.966]YEVLTPLK.W		N[+1], S[+80]	752.869	2	1504.73	1504.73	0	-1.7	29	NRagged	169.99	169.99	169.99	2.53	1104	>sp|P02817|AMELX_BOVIN Amelogenin, X isoform OS=Bos taurus OX=9913 GN=AMELX PE=1 SV=2	1	hf1_eb_18273_84_20032023.ScanId;v=1;d1=28589.28589.2	controllerType=0 controllerNumber=1 scan=28589	62.962
35629:2	1	Y.IN[+0.984]FS[+79.966]YEVLTPLK.W		N[+1], S[+80]	752.87	2	1504.73	1504.73	0	-0.4	29	NRagged	196.88	196.88	196.88	3.24	1104	>sp|P02817|AMELX_BOVIN Amelogenin, X isoform OS=Bos taurus OX=9913 GN=AMELX PE=1 SV=2	1	hf1_eb_18273_84_20032023.ScanId;v=1;d1=28604.28604.2	controllerType=0 controllerNumber=1 scan=28604	62.9873
31001:2	1	Y.IN[+0.984]FS[+79.966]YEVLTPLK.W		N[+1], S[+80]	752.87	2	1504.73	1504.73	0	-0.4	29	NRagged	301.47	301.47	301.47	5.58	1104	>sp|P02817|AMELX_BOVIN Amelogenin, X isoform OS=Bos taurus OX=9913 GN=AMELX PE=1 SV=2	1	hf1_eb_18273_84_20032023.ScanId;v=1;d1=25437.25437.2	controllerType=0 controllerNumber=1 scan=25437	57.2935
30742:2	1	Y.IN[+0.984]FS[+79.966]YEVLTPLK.W		N[+1], S[+80]	752.87	2	1504.73	1504.73	0	-0.3	29	NRagged	376.91	376.91	248.59	6.63	1104	>sp|P02817|AMELX_BOVIN Amelogenin, X isoform OS=Bos taurus OX=9913 GN=AMELX PE=1 SV=2	1	hf1_eb_18273_84_20032023.ScanId;v=1;d1=25260.25260.3	controllerType=0 controllerNumber=1 scan=25260	56.9812
33179:2	1	Y.IN[+0.984]FS[+79.966]YEVLTPLK.W		N[+1], S[+80]	752.871	2	1504.73	1504.73	0	0.6	29	NRagged	405.2	405.2	395.19	6.59	1104	>sp|P02817|AMELX_BOVIN Amelogenin, X isoform OS=Bos taurus OX=9913 GN=AMELX PE=1 SV=2	1	hf1_eb_18273_84_20032023.ScanId;v=1;d1=26942.26942.3	controllerType=0 controllerNumber=1 scan=26942	60.0059
32609:2	1	Y.IN[+0.984]FS[+79.966]YEVLTPLK.W		N[+1], S[+80]	752.869	2	1504.73	1504.73	0	-1.9	29	NRagged	445.25	445.25	419.91	6.52	1104	>sp|P02817|AMELX_BOVIN Amelogenin, X isoform OS=Bos taurus OX=9913 GN=AMELX PE=1 SV=2	1	hf1_eb_18273_84_20032023.ScanId;v=1;d1=26558.26558.3	controllerType=0 controllerNumber=1 scan=26558	59.3205
30572:2	1	Y.IN[+0.984]FS[+79.966]YEVLTPLK.W		N[+1], S[+80]	752.87	2	1504.73	1504.73	0	-0.3	29	NRagged	446.83	378.64	316.02	6.96	1104	>sp|P02817|AMELX_BOVIN Amelogenin, X isoform OS=Bos taurus OX=9913 GN=AMELX PE=1 SV=2	1	hf1_eb_18273_84_20032023.ScanId;v=1;d1=25147.25147.2	controllerType=0 controllerNumber=1 scan=25147	56.7807
32105:2	1	Y.IN[+0.984]FS[+79.966]YEVLTPLK.W		N[+1], S[+80]	752.871	2	1504.73	1504.73	0	0.6	29	NRagged	559.95	468.37	468.37	7.1	1104	>sp|P02817|AMELX_BOVIN Amelogenin, X isoform OS=Bos taurus OX=9913 GN=AMELX PE=1 SV=2	1	hf1_eb_18273_84_20032023.ScanId;v=1;d1=26210.26210.2	controllerType=0 controllerNumber=1 scan=26210	58.6935
31513:2	1	Y.IN[+0.984]FS[+79.966]YEVLTPLK.W		N[+1], S[+80]	752.87	2	1504.73	1504.73	0	-1	29	NRagged	587.28	447.13	447.13	8.11	1104	>sp|P02817|AMELX_BOVIN Amelogenin, X isoform OS=Bos taurus OX=9913 GN=AMELX PE=1 SV=2	1	hf1_eb_18273_84_20032023.ScanId;v=1;d1=25788.25788.2	controllerType=0 controllerNumber=1 scan=25788	57.9179
32390:2	1	Y.IN[+0.984]FS[+79.966]YEVLTPLK.W		N[+1], S[+80]	752.87	2	1504.73	1504.73	0	-0.4	29	NRagged	592.58	536.84	526.88	8.11	1104	>sp|P02817|AMELX_BOVIN Amelogenin, X isoform OS=Bos taurus OX=9913 GN=AMELX PE=1 SV=2	1	hf1_eb_18273_84_20032023.ScanId;v=1;d1=26406.26406.2	controllerType=0 controllerNumber=1 scan=26406	59.0469
31775:2	1	Y.IN[+0.984]FS[+79.966]YEVLTPLK.W		N[+1], S[+80]	752.87	2	1504.73	1504.73	0	-1.2	29	NRagged	600.95	477.49	477.49	9.11	1104	>sp|P02817|AMELX_BOVIN Amelogenin, X isoform OS=Bos taurus OX=9913 GN=AMELX PE=1 SV=2	1	hf1_eb_18273_84_20032023.ScanId;v=1;d1=25981.25981.2	controllerType=0 controllerNumber=1 scan=25981	58.2718
30906:2	1	Y.IN[+0.984]FS[+79.966]YEVLTPLK.W		N[+1], S[+80]	752.87	2	1504.73	1504.73	0	0.1	29	NRagged	603.84	589.74	523.25	9.11	1104	>sp|P02817|AMELX_BOVIN Amelogenin, X isoform OS=Bos taurus OX=9913 GN=AMELX PE=1 SV=2	1	hf1_eb_18273_84_20032023.ScanId;v=1;d1=25375.25375.2	controllerType=0 controllerNumber=1 scan=25375	57.1865
33375:3	1	Y.INFSYEVLTPLKW.Y			537.292	3	1609.86	1609.86	0	0.2	29	Non	70.06	70.06	70.06	1.47	1104	>sp|P02817|AMELX_BOVIN Amelogenin, X isoform OS=Bos taurus OX=9913 GN=AMELX PE=1 SV=2	1	hf1_eb_18273_84_20032023.ScanId;v=1;d1=27072.27072.3	controllerType=0 controllerNumber=1 scan=27072	60.2405
36634:2	1	Y.INFS[+79.966]YEVLTPLKW.Y		S[+80]	845.417	2	1689.83	1689.83	0	-0.8	29	Non	295.59	295.59	295.59	5.77	1104	>sp|P02817|AMELX_BOVIN Amelogenin, X isoform OS=Bos taurus OX=9913 GN=AMELX PE=1 SV=2	1	hf1_eb_18273_84_20032023.ScanId;v=1;d1=29290.29290.2	controllerType=0 controllerNumber=1 scan=29290	64.1695
36430:2	1	Y.IN[+0.984]FSYEVLTPLKW.Y		N[+1]	805.927	2	1610.85	1610.85	0	-0.4	29	Non	570.22	530.78	530.78	8.3	1104	>sp|P02817|AMELX_BOVIN Amelogenin, X isoform OS=Bos taurus OX=9913 GN=AMELX PE=1 SV=2	1	hf1_eb_18273_84_20032023.ScanId;v=1;d1=29138.29138.2	controllerType=0 controllerNumber=1 scan=29138	63.9239
36635:2	1	Y.IN[+0.984]FS[+79.966]YEVLTPLKW.Y		N[+1], S[+80]	845.91	2	1690.81	1690.81	0	0	29	Non	580.87	514.96	491.07	8.3	1104	>sp|P02817|AMELX_BOVIN Amelogenin, X isoform OS=Bos taurus OX=9913 GN=AMELX PE=1 SV=2	1	hf1_eb_18273_84_20032023.ScanId;v=1;d1=29290.29290.2	controllerType=0 controllerNumber=1 scan=29290	64.1695
36538:2	1	Y.IN[+0.984]FSYEVLTPLKWY.Q		N[+1]	887.458	2	1773.91	1773.91	0	-0.6	29	Non	505.74	160.54	160.54	5.02	1104	>sp|P02817|AMELX_BOVIN Amelogenin, X isoform OS=Bos taurus OX=9913 GN=AMELX PE=1 SV=2	1	hf1_eb_18273_84_20032023.ScanId;v=1;d1=29218.29218.2	controllerType=0 controllerNumber=1 scan=29218	64.0556
34795:3	1	Y.INFSYEVLTPLKWYQ[+0.984].S		Q[+1]	634.66	3	1901.97	1901.97	0	-1.3	29	Non	67.8	67.8	67.8	1.47	1104	>sp|P02817|AMELX_BOVIN Amelogenin, X isoform OS=Bos taurus OX=9913 GN=AMELX PE=1 SV=2	1	hf1_eb_18273_84_20032023.ScanId;v=1;d1=28031.28031.3	controllerType=0 controllerNumber=1 scan=28031	61.962
34213:3	1	Y.INFSYEVLTPLKWYQ[+0.984].S		Q[+1]	634.661	3	1901.97	1901.97	0	0.6	29	Non	128.88	128.88	128.88	2.28	1104	>sp|P02817|AMELX_BOVIN Amelogenin, X isoform OS=Bos taurus OX=9913 GN=AMELX PE=1 SV=2	1	hf1_eb_18273_84_20032023.ScanId;v=1;d1=27639.27639.3	controllerType=0 controllerNumber=1 scan=27639	61.2666
36594:2	1	Y.INFS[+79.966]YEVLTPLKWYQ[+0.984].S		Q[+1], S[+80]	991.471	2	1981.94	1981.93	0	0.6	29	Non	302.59	302.59	239.95	5.43	1104	>sp|P02817|AMELX_BOVIN Amelogenin, X isoform OS=Bos taurus OX=9913 GN=AMELX PE=1 SV=2	1	hf1_eb_18273_84_20032023.ScanId;v=1;d1=29259.29259.2	controllerType=0 controllerNumber=1 scan=29259	64.1196
36442:2	1	Y.IN[+0.984]FSYEVLTPLKWYQ[+0.984].S		N[+1], Q[+1]	951.981	2	1902.96	1902.95	0	1.7	29	Non	592.61	475.26	475.26	7.96	1104	>sp|P02817|AMELX_BOVIN Amelogenin, X isoform OS=Bos taurus OX=9913 GN=AMELX PE=1 SV=2	1	hf1_eb_18273_84_20032023.ScanId;v=1;d1=29146.29146.2	controllerType=0 controllerNumber=1 scan=29146	63.9373
36426:2	1	Y.IN[+0.984]FSYEVLTPLKWYQ[+0.984]S.M		N[+1], Q[+1]	995.496	2	1989.98	1989.98	0	0.1	29	Non	581.01	519.92	519.92	7.9	1104	>sp|P02817|AMELX_BOVIN Amelogenin, X isoform OS=Bos taurus OX=9913 GN=AMELX PE=1 SV=2	1	hf1_eb_18273_84_20032023.ScanId;v=1;d1=29136.29136.2	controllerType=0 controllerNumber=1 scan=29136	63.9209
36611:2	1	Y.IN[+0.984]FS[+79.966]YEVLTPLKWYQ[+0.984]S.M		N[+1], Q[+1], S[+80]	1035.48	2	2069.95	2069.95	0	1	29	Non	464.98	431.69	255.85	7.58	1104	>sp|P02817|AMELX_BOVIN Amelogenin, X isoform OS=Bos taurus OX=9913 GN=AMELX PE=1 SV=2	1	hf1_eb_18273_84_20032023.ScanId;v=1;d1=29273.29273.2	controllerType=0 controllerNumber=1 scan=29273	64.1444
26563:2	1	I.N[+0.984]FSYEVLTPLK.W		N[+1]	656.345	2	1311.68	1311.68	0	-0.3	30	NRagged	383.22	323.6	323.6	5.85	1104	>sp|P02817|AMELX_BOVIN Amelogenin, X isoform OS=Bos taurus OX=9913 GN=AMELX PE=1 SV=2	1	hf1_eb_18273_84_20032023.ScanId;v=1;d1=22340.22340.2	controllerType=0 controllerNumber=1 scan=22340	51.8152
29116:2	1	I.N[+0.984]FSYEVLTPLK.W		N[+1]	656.344	2	1311.68	1311.68	0	-1.6	30	NRagged	471.01	358.43	358.43	5.97	1104	>sp|P02817|AMELX_BOVIN Amelogenin, X isoform OS=Bos taurus OX=9913 GN=AMELX PE=1 SV=2	1	hf1_eb_18273_84_20032023.ScanId;v=1;d1=24109.24109.2	controllerType=0 controllerNumber=1 scan=24109	54.9293
27271:2	1	I.N[+0.984]FSYEVLTPLK.W		N[+1]	656.344	2	1311.68	1311.68	0	-1.6	30	NRagged	502.38	417.46	417.46	6.7	1104	>sp|P02817|AMELX_BOVIN Amelogenin, X isoform OS=Bos taurus OX=9913 GN=AMELX PE=1 SV=2	1	hf1_eb_18273_84_20032023.ScanId;v=1;d1=22831.22831.2	controllerType=0 controllerNumber=1 scan=22831	52.6877
30925:2	1	I.N[+0.984]FS[+79.966]YEVLTPLK.W		N[+1], S[+80]	696.327	2	1391.65	1391.65	0	-1.6	30	NRagged	289.63	255.3	255.3	5.22	1104	>sp|P02817|AMELX_BOVIN Amelogenin, X isoform OS=Bos taurus OX=9913 GN=AMELX PE=1 SV=2	1	hf1_eb_18273_84_20032023.ScanId;v=1;d1=25388.25388.2	controllerType=0 controllerNumber=1 scan=25388	57.2089
29865:2	1	I.N[+0.984]FS[+79.966]YEVLTPLK.W		N[+1], S[+80]	696.327	2	1391.65	1391.65	0	-1.2	30	NRagged	357.71	357.71	357.71	5.8	1104	>sp|P02817|AMELX_BOVIN Amelogenin, X isoform OS=Bos taurus OX=9913 GN=AMELX PE=1 SV=2	1	hf1_eb_18273_84_20032023.ScanId;v=1;d1=24625.24625.2	controllerType=0 controllerNumber=1 scan=24625	55.8396
29582:2	1	I.N[+0.984]FS[+79.966]YEVLTPLK.W		N[+1], S[+80]	696.327	2	1391.65	1391.65	0	-2.1	30	NRagged	546.87	445.17	445.17	7.22	1104	>sp|P02817|AMELX_BOVIN Amelogenin, X isoform OS=Bos taurus OX=9913 GN=AMELX PE=1 SV=2	1	hf1_eb_18273_84_20032023.ScanId;v=1;d1=24427.24427.2	controllerType=0 controllerNumber=1 scan=24427	55.4887
30978:2	1	I.N[+0.984]FS[+79.966]YEVLTPLK.W		N[+1], S[+80]	696.327	2	1391.65	1391.65	0	-1.6	30	NRagged	570.65	460.11	460.11	7.89	1104	>sp|P02817|AMELX_BOVIN Amelogenin, X isoform OS=Bos taurus OX=9913 GN=AMELX PE=1 SV=2	1	hf1_eb_18273_84_20032023.ScanId;v=1;d1=25422.25422.2	controllerType=0 controllerNumber=1 scan=25422	57.2682
36625:2	1	I.N[+0.984]FS[+79.966]YEVLTPLKW.Y		N[+1], S[+80]	789.369	2	1577.73	1577.73	0	0.8	30	Non	279.55	279.55	236.33	4.4	1104	>sp|P02817|AMELX_BOVIN Amelogenin, X isoform OS=Bos taurus OX=9913 GN=AMELX PE=1 SV=2	1	hf1_eb_18273_84_20032023.ScanId;v=1;d1=29284.29284.2	controllerType=0 controllerNumber=1 scan=29284	64.1621
25188:1	1	N.FSYEVL.T			757.377	1	757.377	757.377	0	0	31	Non	246.46	133.31	133.31	2.13	1104	>sp|P02817|AMELX_BOVIN Amelogenin, X isoform OS=Bos taurus OX=9913 GN=AMELX PE=1 SV=2	1	hf1_eb_18273_84_20032023.ScanId;v=1;d1=21374.21374.3	controllerType=0 controllerNumber=1 scan=21374	50.0821
24915:1	1	N.FSYEVL.T			757.376	1	757.376	757.377	0	-0.2	31	Non	380.53	248.75	248.75	3.81	1104	>sp|P02817|AMELX_BOVIN Amelogenin, X isoform OS=Bos taurus OX=9913 GN=AMELX PE=1 SV=2	1	hf1_eb_18273_84_20032023.ScanId;v=1;d1=21182.21182.3	controllerType=0 controllerNumber=1 scan=21182	49.7408
22558:1	1	N.FSYEVLT.P			858.427	1	858.427	858.424	0	2.9	31	Non	319.81	252.62	252.62	3.12	1104	>sp|P02817|AMELX_BOVIN Amelogenin, X isoform OS=Bos taurus OX=9913 GN=AMELX PE=1 SV=2	1	hf1_eb_18273_84_20032023.ScanId;v=1;d1=19528.19528.2	controllerType=0 controllerNumber=1 scan=19528	46.8101
28611:1	1	N.FS[+79.966]YEVLTP.L		S[+80]	1035.44	1	1035.44	1035.44	0	-0.6	31	Non	140.3	140.3	140.3	1.7	1104	>sp|P02817|AMELX_BOVIN Amelogenin, X isoform OS=Bos taurus OX=9913 GN=AMELX PE=1 SV=2	1	hf1_eb_18273_84_20032023.ScanId;v=1;d1=23754.23754.2	controllerType=0 controllerNumber=1 scan=23754	54.297
32831:2	1	N.FSYEVLTPL.K			534.784	2	1068.56	1068.56	0	-0.1	31	Non	180.17	180.17	180.17	2.15	1104	>sp|P02817|AMELX_BOVIN Amelogenin, X isoform OS=Bos taurus OX=9913 GN=AMELX PE=1 SV=2	1	hf1_eb_18273_84_20032023.ScanId;v=1;d1=26708.26708.2	controllerType=0 controllerNumber=1 scan=26708	59.5888
34667:2	1	N.FSYEVLTPL.K			534.784	2	1068.56	1068.56	0	0.2	31	Non	277.14	277.14	277.14	3.72	1104	>sp|P02817|AMELX_BOVIN Amelogenin, X isoform OS=Bos taurus OX=9913 GN=AMELX PE=1 SV=2	1	hf1_eb_18273_84_20032023.ScanId;v=1;d1=27943.27943.2	controllerType=0 controllerNumber=1 scan=27943	61.8049
32541:2	1	N.FSYEVLTPL.K			534.784	2	1068.56	1068.56	0	0.1	31	Non	283.07	212	212	4.03	1104	>sp|P02817|AMELX_BOVIN Amelogenin, X isoform OS=Bos taurus OX=9913 GN=AMELX PE=1 SV=2	1	hf1_eb_18273_84_20032023.ScanId;v=1;d1=26512.26512.2	controllerType=0 controllerNumber=1 scan=26512	59.2372
36176:2	1	N.FS[+79.966]YEVLTPL.K		S[+80]	574.767	2	1148.53	1148.53	0	-0.9	31	Non	195.35	161.34	161.34	2.15	1104	>sp|P02817|AMELX_BOVIN Amelogenin, X isoform OS=Bos taurus OX=9913 GN=AMELX PE=1 SV=2	1	hf1_eb_18273_84_20032023.ScanId;v=1;d1=28976.28976.2	controllerType=0 controllerNumber=1 scan=28976	63.6506
22532:2	1	N.FSYEVLTPLK.W			598.832	2	1196.66	1196.66	0	1	31	NRagged	321.93	241.82	241.82	5.23	1104	>sp|P02817|AMELX_BOVIN Amelogenin, X isoform OS=Bos taurus OX=9913 GN=AMELX PE=1 SV=2	1	hf1_eb_18273_84_20032023.ScanId;v=1;d1=19509.19509.2	controllerType=0 controllerNumber=1 scan=19509	46.7773
24487:2	1	N.FSYEVLTPLK.W			598.831	2	1196.66	1196.66	0	-0.9	31	NRagged	354.76	329.85	329.85	5.86	1104	>sp|P02817|AMELX_BOVIN Amelogenin, X isoform OS=Bos taurus OX=9913 GN=AMELX PE=1 SV=2	1	hf1_eb_18273_84_20032023.ScanId;v=1;d1=20886.20886.3	controllerType=0 controllerNumber=1 scan=20886	49.2213
22807:2	1	N.FSYEVLTPLK.W			598.831	2	1196.66	1196.66	0	-0.9	31	NRagged	510.62	322.87	322.87	6.61	1104	>sp|P02817|AMELX_BOVIN Amelogenin, X isoform OS=Bos taurus OX=9913 GN=AMELX PE=1 SV=2	1	hf1_eb_18273_84_20032023.ScanId;v=1;d1=19704.19704.2	controllerType=0 controllerNumber=1 scan=19704	47.1206
24393:2	1	N.FSYEVLTPLK.W			598.831	2	1196.66	1196.66	0	-0.8	31	NRagged	587.94	388.91	388.91	8.11	1104	>sp|P02817|AMELX_BOVIN Amelogenin, X isoform OS=Bos taurus OX=9913 GN=AMELX PE=1 SV=2	1	hf1_eb_18273_84_20032023.ScanId;v=1;d1=20820.20820.2	controllerType=0 controllerNumber=1 scan=20820	49.1047
27993:1	1	N.FS[+79.966]YEVLTPLK.W		S[+80]	1276.62	1	1276.62	1276.62	0	1.7	31	NRagged	220.74	220.74	220.74	4.04	1104	>sp|P02817|AMELX_BOVIN Amelogenin, X isoform OS=Bos taurus OX=9913 GN=AMELX PE=1 SV=2	1	hf1_eb_18273_84_20032023.ScanId;v=1;d1=23327.23327.2	controllerType=0 controllerNumber=1 scan=23327	53.5449
30812:2	1	N.FS[+79.966]YEVLTPLK.W		S[+80]	638.815	2	1276.62	1276.62	0	-0.3	31	NRagged	288.62	228.86	228.86	5.51	1104	>sp|P02817|AMELX_BOVIN Amelogenin, X isoform OS=Bos taurus OX=9913 GN=AMELX PE=1 SV=2	1	hf1_eb_18273_84_20032023.ScanId;v=1;d1=25308.25308.4	controllerType=0 controllerNumber=1 scan=25308	57.0634
28207:2	1	N.FS[+79.966]YEVLTPLK.W		S[+80]	638.814	2	1276.62	1276.62	0	-0.6	31	NRagged	395.04	323.74	323.74	5.92	1104	>sp|P02817|AMELX_BOVIN Amelogenin, X isoform OS=Bos taurus OX=9913 GN=AMELX PE=1 SV=2	1	hf1_eb_18273_84_20032023.ScanId;v=1;d1=23476.23476.2	controllerType=0 controllerNumber=1 scan=23476	53.805
29346:2	1	N.FS[+79.966]YEVLTPLK.W		S[+80]	638.813	2	1276.62	1276.62	0	-2.1	31	NRagged	412.88	289.92	289.92	5.62	1104	>sp|P02817|AMELX_BOVIN Amelogenin, X isoform OS=Bos taurus OX=9913 GN=AMELX PE=1 SV=2	1	hf1_eb_18273_84_20032023.ScanId;v=1;d1=24259.24259.2	controllerType=0 controllerNumber=1 scan=24259	55.1953
28158:2	1	N.FS[+79.966]YEVLTPLK.W		S[+80]	638.814	2	1276.62	1276.62	0	-0.7	31	NRagged	429.7	315.56	315.56	5.84	1104	>sp|P02817|AMELX_BOVIN Amelogenin, X isoform OS=Bos taurus OX=9913 GN=AMELX PE=1 SV=2	1	hf1_eb_18273_84_20032023.ScanId;v=1;d1=23439.23439.2	controllerType=0 controllerNumber=1 scan=23439	53.7408
23384:2	1	N.FS[+79.966]YEVLTPLK.W		S[+80]	638.814	2	1276.62	1276.62	0	-1.7	31	NRagged	474.98	303.69	303.69	5.59	1104	>sp|P02817|AMELX_BOVIN Amelogenin, X isoform OS=Bos taurus OX=9913 GN=AMELX PE=1 SV=2	1	hf1_eb_18273_84_20032023.ScanId;v=1;d1=20101.20101.2	controllerType=0 controllerNumber=1 scan=20101	47.8297
27858:2	1	N.FS[+79.966]YEVLTPLK.W		S[+80]	638.814	2	1276.62	1276.62	0	-0.9	31	NRagged	525.48	339.88	339.88	6.19	1104	>sp|P02817|AMELX_BOVIN Amelogenin, X isoform OS=Bos taurus OX=9913 GN=AMELX PE=1 SV=2	1	hf1_eb_18273_84_20032023.ScanId;v=1;d1=23231.23231.2	controllerType=0 controllerNumber=1 scan=23231	53.3811
25933:2	1	N.FS[+79.966]Y[+15.995]EVLTPLK.W		S[+80], Y[+16]	646.812	2	1292.62	1292.62	0	0.1	31	NRagged	266.33	210.87	50.36	4.11	1104	>sp|P02817|AMELX_BOVIN Amelogenin, X isoform OS=Bos taurus OX=9913 GN=AMELX PE=1 SV=2	1	hf1_eb_18273_84_20032023.ScanId;v=1;d1=21918.21918.2	controllerType=0 controllerNumber=1 scan=21918	51.065
33216:2	1	N.FSYEVLTPLKW.Y			691.871	2	1382.73	1382.74	0	-0.9	31	Non	254.59	254.59	254.59	5.07	1104	>sp|P02817|AMELX_BOVIN Amelogenin, X isoform OS=Bos taurus OX=9913 GN=AMELX PE=1 SV=2	1	hf1_eb_18273_84_20032023.ScanId;v=1;d1=26966.26966.2	controllerType=0 controllerNumber=1 scan=26966	60.0471
34056:2	1	N.FSYEVLTPLKW.Y			691.872	2	1382.74	1382.74	0	0.3	31	Non	316.98	316.98	316.98	5.67	1104	>sp|P02817|AMELX_BOVIN Amelogenin, X isoform OS=Bos taurus OX=9913 GN=AMELX PE=1 SV=2	1	hf1_eb_18273_84_20032023.ScanId;v=1;d1=27537.27537.2	controllerType=0 controllerNumber=1 scan=27537	61.0821
36484:2	1	N.FS[+79.966]YEVLTPLKW.Y		S[+80]	731.854	2	1462.7	1462.7	0	-0.2	31	Non	482.37	406.99	406.99	6.9	1104	>sp|P02817|AMELX_BOVIN Amelogenin, X isoform OS=Bos taurus OX=9913 GN=AMELX PE=1 SV=2	1	hf1_eb_18273_84_20032023.ScanId;v=1;d1=29178.29178.2	controllerType=0 controllerNumber=1 scan=29178	63.9881
35850:2	1	N.FSYEVLTPLKWY.Q			773.404	2	1545.8	1545.8	0	0.7	31	Non	551.61	551.61	551.61	7.08	1104	>sp|P02817|AMELX_BOVIN Amelogenin, X isoform OS=Bos taurus OX=9913 GN=AMELX PE=1 SV=2	1	hf1_eb_18273_84_20032023.ScanId;v=1;d1=28764.28764.2	controllerType=0 controllerNumber=1 scan=28764	63.272
36578:2	1	N.FS[+79.966]YEVLTPLKWY.Q		S[+80]	813.386	2	1625.76	1625.77	0	-0.5	31	Non	429.58	383.61	363.33	6.69	1104	>sp|P02817|AMELX_BOVIN Amelogenin, X isoform OS=Bos taurus OX=9913 GN=AMELX PE=1 SV=2	1	hf1_eb_18273_84_20032023.ScanId;v=1;d1=29246.29246.2	controllerType=0 controllerNumber=1 scan=29246	64.0997
35853:2	1	N.FS[+79.966]YEVLTPLKW[+15.995]Y.Q		S[+80], W[+16]	821.385	2	1641.76	1641.76	0	1.3	31	Non	304.71	304.71	11.34	5.39	1104	>sp|P02817|AMELX_BOVIN Amelogenin, X isoform OS=Bos taurus OX=9913 GN=AMELX PE=1 SV=2	1	hf1_eb_18273_84_20032023.ScanId;v=1;d1=28766.28766.4	controllerType=0 controllerNumber=1 scan=28766	63.275
34843:2	1	N.FSYEVLTPLKWYQ[+0.984].S		Q[+1]	837.924	2	1674.84	1674.84	0	-0.2	31	Non	562.79	470.76	470.76	8.3	1104	>sp|P02817|AMELX_BOVIN Amelogenin, X isoform OS=Bos taurus OX=9913 GN=AMELX PE=1 SV=2	1	hf1_eb_18273_84_20032023.ScanId;v=1;d1=28064.28064.2	controllerType=0 controllerNumber=1 scan=28064	62.023
35484:2	1	N.FS[+79.966]YEVLTPLKWYQ[+0.984].S		Q[+1], S[+80]	877.906	2	1754.8	1754.81	0	-2	31	Non	260.63	260.63	260.63	5.17	1104	>sp|P02817|AMELX_BOVIN Amelogenin, X isoform OS=Bos taurus OX=9913 GN=AMELX PE=1 SV=2	1	hf1_eb_18273_84_20032023.ScanId;v=1;d1=28502.28502.2	controllerType=0 controllerNumber=1 scan=28502	62.8056
36497:2	1	N.FS[+79.966]YEVLTPLKWYQ[+0.984].S		Q[+1], S[+80]	877.907	2	1754.81	1754.81	0	-0.7	31	Non	405.77	376.81	361.79	7.12	1104	>sp|P02817|AMELX_BOVIN Amelogenin, X isoform OS=Bos taurus OX=9913 GN=AMELX PE=1 SV=2	1	hf1_eb_18273_84_20032023.ScanId;v=1;d1=29189.29189.2	controllerType=0 controllerNumber=1 scan=29189	64.0059
36493:2	1	N.FS[+79.966]YEVLTPLKWYQ[+0.984]S.M		Q[+1], S[+80]	921.423	2	1841.84	1841.84	0	-0.1	31	Non	360.62	269.66	186.44	5.88	1104	>sp|P02817|AMELX_BOVIN Amelogenin, X isoform OS=Bos taurus OX=9913 GN=AMELX PE=1 SV=2	1	hf1_eb_18273_84_20032023.ScanId;v=1;d1=29186.29186.2	controllerType=0 controllerNumber=1 scan=29186	64.0023
34615:2	1	N.FSYEVLTPLKWYQSM[+15.995].I		M[+16]	954.458	2	1907.91	1907.92	0	-8.7	31	Non	233.17	233.17	69.2	2.73	1104	>sp|P02817|AMELX_BOVIN Amelogenin, X isoform OS=Bos taurus OX=9913 GN=AMELX PE=1 SV=2	1	hf1_eb_18273_84_20032023.ScanId;v=1;d1=27907.27907.2	controllerType=0 controllerNumber=1 scan=27907	61.7364
36471:2	1	N.FS[+79.966]YEVLTPLKWYQ[+0.984]SM[+15.995].I		M[+16], Q[+1], S[+80]	994.942	2	1988.88	1988.88	0	0.6	31	Non	327.79	327.79	86.28	5.65	1104	>sp|P02817|AMELX_BOVIN Amelogenin, X isoform OS=Bos taurus OX=9913 GN=AMELX PE=1 SV=2	1	hf1_eb_18273_84_20032023.ScanId;v=1;d1=29168.29168.2	controllerType=0 controllerNumber=1 scan=29168	63.9722
34128:3	1	N.FSYEVLTPLKWYQ[+0.984]SM[+15.995]IR.H		M[+16], Q[+1]	726.702	3	2178.09	2178.09	0	-0.4	31	NRagged	349	349	28.75	7.25	1104	>sp|P02817|AMELX_BOVIN Amelogenin, X isoform OS=Bos taurus OX=9913 GN=AMELX PE=1 SV=2	1	hf1_eb_18273_84_20032023.ScanId;v=1;d1=27583.27583.3	controllerType=0 controllerNumber=1 scan=27583	61.1624
36394:3	1	N.FS[+79.966]YEVLTPLKWYQ[+0.984]SM[+15.995]IR.H		M[+16], Q[+1], S[+80]	753.358	3	2258.06	2258.06	0	0.1	31	NRagged	411.29	411.29	33.89	8.09	1104	>sp|P02817|AMELX_BOVIN Amelogenin, X isoform OS=Bos taurus OX=9913 GN=AMELX PE=1 SV=2	1	hf1_eb_18273_84_20032023.ScanId;v=1;d1=29114.29114.3	controllerType=0 controllerNumber=1 scan=29114	63.8847
35669:3	1	N.FS[+79.966]YEVLTPLKWYQ[+0.984]SM[+15.995]IRH.P		M[+16], Q[+1], S[+80]	799.045	3	2395.12	2395.12	0	0.4	31	Non	229.16	229.16	19.77	4.5	1104	>sp|P02817|AMELX_BOVIN Amelogenin, X isoform OS=Bos taurus OX=9913 GN=AMELX PE=1 SV=2	1	hf1_eb_18273_84_20032023.ScanId;v=1;d1=28632.28632.3	controllerType=0 controllerNumber=1 scan=28632	63.0381
35917:3	1	N.FS[+79.966]YEVLTPLKWYQ[+0.984]SMIRH[+15.995]P.Y		H[+16], Q[+1], S[+80]	831.397	3	2492.18	2492.17	0	1.3	31	Non	105.43	105.43	2.44	2.73	1104	>sp|P02817|AMELX_BOVIN Amelogenin, X isoform OS=Bos taurus OX=9913 GN=AMELX PE=1 SV=2	1	hf1_eb_18273_84_20032023.ScanId;v=1;d1=28810.28810.3	controllerType=0 controllerNumber=1 scan=28810	63.3557
32931:4	1	N.FSYEVLTPLKWYQSMIR[+0.984]HP[+15.995]YP.S		P[+16], R[+1]	668.835	4	2672.32	2672.32	0	-0.9	31	Non	74.41	74.41	0	2.66	1104	>sp|P02817|AMELX_BOVIN Amelogenin, X isoform OS=Bos taurus OX=9913 GN=AMELX PE=1 SV=2	1	hf1_eb_18273_84_20032023.ScanId;v=1;d1=26775.26775.4	controllerType=0 controllerNumber=1 scan=26775	59.7069
36185:3	1	N.FS[+79.966]YEVLTPLKWYQ[+0.984]SM[+15.995]IRHPYP.S		M[+16], Q[+1], S[+80]	918.101	3	2752.29	2752.29	0	-0.2	31	Non	348.22	304.63	18.77	7.06	1104	>sp|P02817|AMELX_BOVIN Amelogenin, X isoform OS=Bos taurus OX=9913 GN=AMELX PE=1 SV=2	1	hf1_eb_18273_84_20032023.ScanId;v=1;d1=28982.28982.3	controllerType=0 controllerNumber=1 scan=28982	63.6596
17169:1	1	F.SYEVL.T			610.307	1	610.307	610.308	0	-1.9	32	Non	215.91	215.91	215.91	1.05	1104	>sp|P02817|AMELX_BOVIN Amelogenin, X isoform OS=Bos taurus OX=9913 GN=AMELX PE=1 SV=2	1	hf1_eb_18273_84_20032023.ScanId;v=1;d1=15573.15573.2	controllerType=0 controllerNumber=1 scan=15573	39.6833
17138:1	1	F.SYEVL.T			610.308	1	610.308	610.308	0	-0.2	32	Non	227.5	227.5	227.5	1.19	1104	>sp|P02817|AMELX_BOVIN Amelogenin, X isoform OS=Bos taurus OX=9913 GN=AMELX PE=1 SV=2	1	hf1_eb_18273_84_20032023.ScanId;v=1;d1=15551.15551.2	controllerType=0 controllerNumber=1 scan=15551	39.646
16771:1	1	F.SYEVL.T			610.307	1	610.307	610.308	0	-2	32	Non	422.07	422.07	422.07	4.61	1104	>sp|P02817|AMELX_BOVIN Amelogenin, X isoform OS=Bos taurus OX=9913 GN=AMELX PE=1 SV=2	1	hf1_eb_18273_84_20032023.ScanId;v=1;d1=15279.15279.2	controllerType=0 controllerNumber=1 scan=15279	39.1648
17868:1	1	F.SYEVLTP.L			808.408	1	808.408	808.409	0	-1.2	32	Non	339.59	283.52	283.52	4.64	1104	>sp|P02817|AMELX_BOVIN Amelogenin, X isoform OS=Bos taurus OX=9913 GN=AMELX PE=1 SV=2	1	hf1_eb_18273_84_20032023.ScanId;v=1;d1=16113.16113.2	controllerType=0 controllerNumber=1 scan=16113	40.6664
21166:2	1	F.S[+79.966]YEVLTP.L		S[+80]	444.691	2	888.375	888.375	0	0.3	32	Non	202.06	202.06	202.06	2.35	1104	>sp|P02817|AMELX_BOVIN Amelogenin, X isoform OS=Bos taurus OX=9913 GN=AMELX PE=1 SV=2	1	hf1_eb_18273_84_20032023.ScanId;v=1;d1=18539.18539.2	controllerType=0 controllerNumber=1 scan=18539	45.0673
26785:2	1	F.SYEVLTPL.K			461.25	2	921.492	921.493	0	-0.6	32	Non	394.66	394.66	394.66	5.22	1104	>sp|P02817|AMELX_BOVIN Amelogenin, X isoform OS=Bos taurus OX=9913 GN=AMELX PE=1 SV=2	1	hf1_eb_18273_84_20032023.ScanId;v=1;d1=22499.22499.2	controllerType=0 controllerNumber=1 scan=22499	52.1032
26203:2	1	F.SYEVLTPL.K			461.25	2	921.492	921.493	0	-0.3	32	Non	455.3	421.03	421.03	5.26	1104	>sp|P02817|AMELX_BOVIN Amelogenin, X isoform OS=Bos taurus OX=9913 GN=AMELX PE=1 SV=2	1	hf1_eb_18273_84_20032023.ScanId;v=1;d1=22103.22103.2	controllerType=0 controllerNumber=1 scan=22103	51.3943
26500:2	1	F.SYEVLTPL.K			461.25	2	921.493	921.493	0	0.1	32	Non	456.29	403.05	403.05	5.2	1104	>sp|P02817|AMELX_BOVIN Amelogenin, X isoform OS=Bos taurus OX=9913 GN=AMELX PE=1 SV=2	1	hf1_eb_18273_84_20032023.ScanId;v=1;d1=22298.22298.2	controllerType=0 controllerNumber=1 scan=22298	51.7432
30919:2	1	F.S[+79.966]YEVLTPL.K		S[+80]	501.233	2	1001.46	1001.46	0	0	32	Non	166.99	166.99	166.99	2.15	1104	>sp|P02817|AMELX_BOVIN Amelogenin, X isoform OS=Bos taurus OX=9913 GN=AMELX PE=1 SV=2	1	hf1_eb_18273_84_20032023.ScanId;v=1;d1=25382.25382.2	controllerType=0 controllerNumber=1 scan=25382	57.197
30169:2	1	F.S[+79.966]YEVLTPL.K		S[+80]	501.233	2	1001.46	1001.46	0	-1.1	32	Non	248.46	248.46	248.46	3.78	1104	>sp|P02817|AMELX_BOVIN Amelogenin, X isoform OS=Bos taurus OX=9913 GN=AMELX PE=1 SV=2	1	hf1_eb_18273_84_20032023.ScanId;v=1;d1=24868.24868.2	controllerType=0 controllerNumber=1 scan=24868	56.2861
30444:2	1	F.S[+79.966]YEVLTPL.K		S[+80]	501.233	2	1001.46	1001.46	0	0	32	Non	263.4	263.4	263.4	3.72	1104	>sp|P02817|AMELX_BOVIN Amelogenin, X isoform OS=Bos taurus OX=9913 GN=AMELX PE=1 SV=2	1	hf1_eb_18273_84_20032023.ScanId;v=1;d1=25060.25060.2	controllerType=0 controllerNumber=1 scan=25060	56.6306
29938:2	1	F.S[+79.966]YEVLTPL.K		S[+80]	501.232	2	1001.46	1001.46	0	-1.7	32	Non	278.03	250.17	250.17	3.41	1104	>sp|P02817|AMELX_BOVIN Amelogenin, X isoform OS=Bos taurus OX=9913 GN=AMELX PE=1 SV=2	1	hf1_eb_18273_84_20032023.ScanId;v=1;d1=24684.24684.2	controllerType=0 controllerNumber=1 scan=24684	55.9481
32440:1	1	F.S[+79.966]YEVLTPL.K		S[+80]	1001.46	1	1001.46	1001.46	0	-0.5	32	Non	281.2	281.2	281.2	4.68	1104	>sp|P02817|AMELX_BOVIN Amelogenin, X isoform OS=Bos taurus OX=9913 GN=AMELX PE=1 SV=2	1	hf1_eb_18273_84_20032023.ScanId;v=1;d1=26443.26443.2	controllerType=0 controllerNumber=1 scan=26443	59.1136
26070:2	1	F.S[+79.966]YEVLTPL.K		S[+80]	501.233	2	1001.46	1001.46	0	0.5	32	Non	293.27	293.27	293.27	3.77	1104	>sp|P02817|AMELX_BOVIN Amelogenin, X isoform OS=Bos taurus OX=9913 GN=AMELX PE=1 SV=2	1	hf1_eb_18273_84_20032023.ScanId;v=1;d1=22013.22013.2	controllerType=0 controllerNumber=1 scan=22013	51.233
35746:1	1	F.S[+79.966]YEVLTPL.K		S[+80]	1001.46	1	1001.46	1001.46	0	2.4	32	Non	310.77	310.77	310.77	3.42	1104	>sp|P02817|AMELX_BOVIN Amelogenin, X isoform OS=Bos taurus OX=9913 GN=AMELX PE=1 SV=2	1	hf1_eb_18273_84_20032023.ScanId;v=1;d1=28690.28690.2	controllerType=0 controllerNumber=1 scan=28690	63.1398
30089:1	1	F.S[+79.966]YEVLTPL.K		S[+80]	1001.46	1	1001.46	1001.46	0	-1.7	32	Non	492.74	492.74	492.74	6.11	1104	>sp|P02817|AMELX_BOVIN Amelogenin, X isoform OS=Bos taurus OX=9913 GN=AMELX PE=1 SV=2	1	hf1_eb_18273_84_20032023.ScanId;v=1;d1=24804.24804.2	controllerType=0 controllerNumber=1 scan=24804	56.1657
31007:2	1	F.SYEVLTPLK.W			525.297	2	1049.59	1049.59	0	-0.4	32	NRagged	232.59	126.01	126.01	2.8	1104	>sp|P02817|AMELX_BOVIN Amelogenin, X isoform OS=Bos taurus OX=9913 GN=AMELX PE=1 SV=2	1	hf1_eb_18273_84_20032023.ScanId;v=1;d1=25442.25442.2	controllerType=0 controllerNumber=1 scan=25442	57.3037
21830:2	1	F.SYEVLTPLK.W			525.297	2	1049.59	1049.59	0	-1.8	32	NRagged	309.33	309.33	309.33	5.2	1104	>sp|P02817|AMELX_BOVIN Amelogenin, X isoform OS=Bos taurus OX=9913 GN=AMELX PE=1 SV=2	1	hf1_eb_18273_84_20032023.ScanId;v=1;d1=19007.19007.4	controllerType=0 controllerNumber=1 scan=19007	45.8931
17997:2	1	F.SYEVLTPLK.W			525.297	2	1049.59	1049.59	0	-1.4	32	NRagged	324.27	252.98	252.98	5.46	1104	>sp|P02817|AMELX_BOVIN Amelogenin, X isoform OS=Bos taurus OX=9913 GN=AMELX PE=1 SV=2	1	hf1_eb_18273_84_20032023.ScanId;v=1;d1=16216.16216.2	controllerType=0 controllerNumber=1 scan=16216	40.8509
18119:2	1	F.SYEVLTPLK.W			525.297	2	1049.59	1049.59	0	-1.1	32	NRagged	335.41	258.23	258.23	5.68	1104	>sp|P02817|AMELX_BOVIN Amelogenin, X isoform OS=Bos taurus OX=9913 GN=AMELX PE=1 SV=2	1	hf1_eb_18273_84_20032023.ScanId;v=1;d1=16313.16313.2	controllerType=0 controllerNumber=1 scan=16313	41.0335
18441:2	1	F.SYEVLTPLK.W			525.297	2	1049.59	1049.59	0	-0.9	32	NRagged	519.76	415.92	415.92	7.22	1104	>sp|P02817|AMELX_BOVIN Amelogenin, X isoform OS=Bos taurus OX=9913 GN=AMELX PE=1 SV=2	1	hf1_eb_18273_84_20032023.ScanId;v=1;d1=16537.16537.2	controllerType=0 controllerNumber=1 scan=16537	41.4284
17650:2	1	F.SYEVLTPLK.W			525.297	2	1049.59	1049.59	0	-1.7	32	NRagged	539.23	389.13	389.13	7.05	1104	>sp|P02817|AMELX_BOVIN Amelogenin, X isoform OS=Bos taurus OX=9913 GN=AMELX PE=1 SV=2	1	hf1_eb_18273_84_20032023.ScanId;v=1;d1=15942.15942.2	controllerType=0 controllerNumber=1 scan=15942	40.3507
21737:2	1	F.S[+79.966]YEVLTPLK.W		S[+80]	565.28	2	1129.55	1129.55	0	-1.2	32	NRagged	171.54	171.54	171.54	2.56	1104	>sp|P02817|AMELX_BOVIN Amelogenin, X isoform OS=Bos taurus OX=9913 GN=AMELX PE=1 SV=2	1	hf1_eb_18273_84_20032023.ScanId;v=1;d1=18940.18940.3	controllerType=0 controllerNumber=1 scan=18940	45.7762
21251:2	1	F.S[+79.966]YEVLTPLK.W		S[+80]	565.281	2	1129.55	1129.55	0	0.6	32	NRagged	207.42	207.42	207.42	3.14	1104	>sp|P02817|AMELX_BOVIN Amelogenin, X isoform OS=Bos taurus OX=9913 GN=AMELX PE=1 SV=2	1	hf1_eb_18273_84_20032023.ScanId;v=1;d1=18600.18600.3	controllerType=0 controllerNumber=1 scan=18600	45.1776
26158:2	1	F.S[+79.966]YEVLTPLK.W		S[+80]	565.281	2	1129.55	1129.55	0	-0.1	32	NRagged	230.68	225.48	225.48	2.89	1104	>sp|P02817|AMELX_BOVIN Amelogenin, X isoform OS=Bos taurus OX=9913 GN=AMELX PE=1 SV=2	1	hf1_eb_18273_84_20032023.ScanId;v=1;d1=22071.22071.2	controllerType=0 controllerNumber=1 scan=22071	51.3357
23580:2	1	F.S[+79.966]YEVLTPLK.W		S[+80]	565.28	2	1129.55	1129.55	0	-1.8	32	NRagged	489.5	347.74	347.74	5.76	1104	>sp|P02817|AMELX_BOVIN Amelogenin, X isoform OS=Bos taurus OX=9913 GN=AMELX PE=1 SV=2	1	hf1_eb_18273_84_20032023.ScanId;v=1;d1=20235.20235.3	controllerType=0 controllerNumber=1 scan=20235	48.0678
23264:2	1	F.S[+79.966]YEVLTPLK.W		S[+80]	565.28	2	1129.55	1129.55	0	-1.1	32	NRagged	494.18	335.36	335.36	6.45	1104	>sp|P02817|AMELX_BOVIN Amelogenin, X isoform OS=Bos taurus OX=9913 GN=AMELX PE=1 SV=2	1	hf1_eb_18273_84_20032023.ScanId;v=1;d1=20016.20016.2	controllerType=0 controllerNumber=1 scan=20016	47.6815
21566:2	1	F.S[+79.966]YEVLTPLK.W		S[+80]	565.28	2	1129.55	1129.55	0	-0.3	32	NRagged	504.48	364.34	364.34	7.22	1104	>sp|P02817|AMELX_BOVIN Amelogenin, X isoform OS=Bos taurus OX=9913 GN=AMELX PE=1 SV=2	1	hf1_eb_18273_84_20032023.ScanId;v=1;d1=18819.18819.2	controllerType=0 controllerNumber=1 scan=18819	45.5669
21894:2	1	F.S[+79.966]YEVLTPLK.W		S[+80]	565.28	2	1129.55	1129.55	0	-1.9	32	NRagged	526.11	389.58	389.58	7.05	1104	>sp|P02817|AMELX_BOVIN Amelogenin, X isoform OS=Bos taurus OX=9913 GN=AMELX PE=1 SV=2	1	hf1_eb_18273_84_20032023.ScanId;v=1;d1=19052.19052.3	controllerType=0 controllerNumber=1 scan=19052	45.97
15077:2	1	F.S[+79.966]YEVLTP[+15.995]LK.W		P[+16], S[+80]	573.277	2	1145.55	1145.55	0	-2.4	32	NRagged	202.33	184.34	36.59	1.81	1104	>sp|P02817|AMELX_BOVIN Amelogenin, X isoform OS=Bos taurus OX=9913 GN=AMELX PE=1 SV=2	1	hf1_eb_18273_84_20032023.ScanId;v=1;d1=14063.14063.2	controllerType=0 controllerNumber=1 scan=14063	37.0151
20143:2	1	F.S[+79.966]Y[+15.995]EVLTPLK.W		S[+80], Y[+16]	573.278	2	1145.55	1145.55	0	-0.6	32	NRagged	278.36	221.96	221.96	4.88	1104	>sp|P02817|AMELX_BOVIN Amelogenin, X isoform OS=Bos taurus OX=9913 GN=AMELX PE=1 SV=2	1	hf1_eb_18273_84_20032023.ScanId;v=1;d1=17807.17807.2	controllerType=0 controllerNumber=1 scan=17807	43.7554
36755:2	1	F.SYEVLTPLKW.Y			618.338	2	1235.67	1235.67	0	1.1	32	Non	116.01	116.01	116.01	1.45	1104	>sp|P02817|AMELX_BOVIN Amelogenin, X isoform OS=Bos taurus OX=9913 GN=AMELX PE=1 SV=2	1	hf1_eb_18273_84_20032023.ScanId;v=1;d1=29373.29373.2	controllerType=0 controllerNumber=1 scan=29373	64.3111
29940:2	1	F.SYEVLTPLKW.Y			618.336	2	1235.66	1235.67	0	-2.6	32	Non	156.55	156.55	156.55	2.15	1104	>sp|P02817|AMELX_BOVIN Amelogenin, X isoform OS=Bos taurus OX=9913 GN=AMELX PE=1 SV=2	1	hf1_eb_18273_84_20032023.ScanId;v=1;d1=24685.24685.2	controllerType=0 controllerNumber=1 scan=24685	55.9496
29419:2	1	F.SYEVLTPLKW.Y			618.336	2	1235.66	1235.67	0	-1.7	32	Non	494.62	488.11	488.11	7.16	1104	>sp|P02817|AMELX_BOVIN Amelogenin, X isoform OS=Bos taurus OX=9913 GN=AMELX PE=1 SV=2	1	hf1_eb_18273_84_20032023.ScanId;v=1;d1=24310.24310.2	controllerType=0 controllerNumber=1 scan=24310	55.2832
29773:2	1	F.SYEVLTPLKW.Y			618.337	2	1235.67	1235.67	0	-0.4	32	Non	496.03	484.36	484.36	7.37	1104	>sp|P02817|AMELX_BOVIN Amelogenin, X isoform OS=Bos taurus OX=9913 GN=AMELX PE=1 SV=2	1	hf1_eb_18273_84_20032023.ScanId;v=1;d1=24559.24559.2	controllerType=0 controllerNumber=1 scan=24559	55.7247
23219:2	1	F.SYEVLTPLKW[+31.990].Y		W[+32]	634.332	2	1267.66	1267.66	0	-0.7	32	Non	194.62	194.62	20.64	2.68	1104	>sp|P02817|AMELX_BOVIN Amelogenin, X isoform OS=Bos taurus OX=9913 GN=AMELX PE=1 SV=2	1	hf1_eb_18273_84_20032023.ScanId;v=1;d1=19985.19985.2	controllerType=0 controllerNumber=1 scan=19985	47.6258
26970:2	1	F.SYEVLTPLKW[+15.995].Y		W[+16]	626.335	2	1251.66	1251.66	0	0.9	32	Non	201.03	201.03	1.89	3.28	1104	>sp|P02817|AMELX_BOVIN Amelogenin, X isoform OS=Bos taurus OX=9913 GN=AMELX PE=1 SV=2	1	hf1_eb_18273_84_20032023.ScanId;v=1;d1=22624.22624.2	controllerType=0 controllerNumber=1 scan=22624	52.3197
26185:2	1	F.SYEVLTPLKW[+15.995].Y		W[+16]	626.335	2	1251.66	1251.66	0	1.2	32	Non	238.15	238.15	9.09	3.6	1104	>sp|P02817|AMELX_BOVIN Amelogenin, X isoform OS=Bos taurus OX=9913 GN=AMELX PE=1 SV=2	1	hf1_eb_18273_84_20032023.ScanId;v=1;d1=22091.22091.2	controllerType=0 controllerNumber=1 scan=22091	51.371
25850:2	1	F.SYEVLTPLKW[+15.995].Y		W[+16]	626.333	2	1251.66	1251.66	0	-2	32	Non	249.56	244.99	8.94	4.52	1104	>sp|P02817|AMELX_BOVIN Amelogenin, X isoform OS=Bos taurus OX=9913 GN=AMELX PE=1 SV=2	1	hf1_eb_18273_84_20032023.ScanId;v=1;d1=21859.21859.3	controllerType=0 controllerNumber=1 scan=21859	50.9593
25727:2	1	F.SYEVLTPLKW[+15.995].Y		W[+16]	626.334	2	1251.66	1251.66	0	-0.9	32	Non	279.57	279.57	4.92	5.07	1104	>sp|P02817|AMELX_BOVIN Amelogenin, X isoform OS=Bos taurus OX=9913 GN=AMELX PE=1 SV=2	1	hf1_eb_18273_84_20032023.ScanId;v=1;d1=21769.21769.2	controllerType=0 controllerNumber=1 scan=21769	50.7939
26045:2	1	F.SYEVLTPLKW[+15.995].Y		W[+16]	626.335	2	1251.66	1251.66	0	0.1	32	Non	286.24	286.24	6.08	5.56	1104	>sp|P02817|AMELX_BOVIN Amelogenin, X isoform OS=Bos taurus OX=9913 GN=AMELX PE=1 SV=2	1	hf1_eb_18273_84_20032023.ScanId;v=1;d1=21994.21994.2	controllerType=0 controllerNumber=1 scan=21994	51.1999
33416:2	1	F.S[+79.966]YEVLTPLKW.Y		S[+80]	658.321	2	1315.63	1315.63	0	0.6	32	Non	387.48	387.48	387.48	6.34	1104	>sp|P02817|AMELX_BOVIN Amelogenin, X isoform OS=Bos taurus OX=9913 GN=AMELX PE=1 SV=2	1	hf1_eb_18273_84_20032023.ScanId;v=1;d1=27103.27103.2	controllerType=0 controllerNumber=1 scan=27103	60.2986
33968:2	1	F.S[+79.966]YEVLTPLKW.Y		S[+80]	658.32	2	1315.63	1315.63	0	-0.3	32	Non	418.01	399.97	399.97	7.38	1104	>sp|P02817|AMELX_BOVIN Amelogenin, X isoform OS=Bos taurus OX=9913 GN=AMELX PE=1 SV=2	1	hf1_eb_18273_84_20032023.ScanId;v=1;d1=27478.27478.2	controllerType=0 controllerNumber=1 scan=27478	60.9761
34258:2	1	F.S[+79.966]YEVLTPLKW.Y		S[+80]	658.32	2	1315.63	1315.63	0	-0.3	32	Non	487.54	427.45	427.45	7.37	1104	>sp|P02817|AMELX_BOVIN Amelogenin, X isoform OS=Bos taurus OX=9913 GN=AMELX PE=1 SV=2	1	hf1_eb_18273_84_20032023.ScanId;v=1;d1=27670.27670.2	controllerType=0 controllerNumber=1 scan=27670	61.3216
30670:2	1	F.S[+79.966]YEVLTPLKW.Y		S[+80]	658.321	2	1315.63	1315.63	0	0.4	32	Non	517.03	510.72	510.72	7.37	1104	>sp|P02817|AMELX_BOVIN Amelogenin, X isoform OS=Bos taurus OX=9913 GN=AMELX PE=1 SV=2	1	hf1_eb_18273_84_20032023.ScanId;v=1;d1=25212.25212.2	controllerType=0 controllerNumber=1 scan=25212	56.895
30047:2	1	F.S[+79.966]YEVLTPLKW[+15.995].Y		S[+80], W[+16]	666.317	2	1331.63	1331.63	0	-1.2	32	Non	157.5	137.69	0.58	1.44	1104	>sp|P02817|AMELX_BOVIN Amelogenin, X isoform OS=Bos taurus OX=9913 GN=AMELX PE=1 SV=2	1	hf1_eb_18273_84_20032023.ScanId;v=1;d1=24773.24773.2	controllerType=0 controllerNumber=1 scan=24773	56.1125
26466:2	1	F.S[+79.966]YEVLTPLKW[+31.990].Y		S[+80], W[+32]	674.315	2	1347.62	1347.62	0	-0.2	32	Non	199.22	199.22	23.49	2.68	1104	>sp|P02817|AMELX_BOVIN Amelogenin, X isoform OS=Bos taurus OX=9913 GN=AMELX PE=1 SV=2	1	hf1_eb_18273_84_20032023.ScanId;v=1;d1=22272.22272.2	controllerType=0 controllerNumber=1 scan=22272	51.6938
25621:2	1	F.S[+79.966]YEVLTPLKW[+31.990].Y		S[+80], W[+32]	674.313	2	1347.62	1347.62	0	-3	32	Non	254.16	235.62	37.7	4.82	1104	>sp|P02817|AMELX_BOVIN Amelogenin, X isoform OS=Bos taurus OX=9913 GN=AMELX PE=1 SV=2	1	hf1_eb_18273_84_20032023.ScanId;v=1;d1=21690.21690.2	controllerType=0 controllerNumber=1 scan=21690	50.6493
30608:2	1	F.S[+79.966]YEVLTPLKW[+31.990].Y		S[+80], W[+32]	674.314	2	1347.62	1347.62	0	-2	32	Non	258.51	256.39	26.66	4.52	1104	>sp|P02817|AMELX_BOVIN Amelogenin, X isoform OS=Bos taurus OX=9913 GN=AMELX PE=1 SV=2	1	hf1_eb_18273_84_20032023.ScanId;v=1;d1=25171.25171.2	controllerType=0 controllerNumber=1 scan=25171	56.8222
36885:2	1	F.SYEVLTPLKWY.Q			699.869	2	1398.73	1398.73	0	-0.2	32	Non	155.02	91.47	91.47	2.41	1104	>sp|P02817|AMELX_BOVIN Amelogenin, X isoform OS=Bos taurus OX=9913 GN=AMELX PE=1 SV=2	1	hf1_eb_18273_84_20032023.ScanId;v=1;d1=29463.29463.2	controllerType=0 controllerNumber=1 scan=29463	64.4623
31571:2	1	F.SYEVLTPLKWY.Q			699.868	2	1398.73	1398.73	0	-0.7	32	Non	510.69	359.24	359.24	6.13	1104	>sp|P02817|AMELX_BOVIN Amelogenin, X isoform OS=Bos taurus OX=9913 GN=AMELX PE=1 SV=2	1	hf1_eb_18273_84_20032023.ScanId;v=1;d1=25830.25830.2	controllerType=0 controllerNumber=1 scan=25830	57.9898
32100:2	1	F.SYEVLTPLKWY.Q			699.869	2	1398.73	1398.73	0	0	32	Non	608.56	420.05	420.05	9.09	1104	>sp|P02817|AMELX_BOVIN Amelogenin, X isoform OS=Bos taurus OX=9913 GN=AMELX PE=1 SV=2	1	hf1_eb_18273_84_20032023.ScanId;v=1;d1=26206.26206.2	controllerType=0 controllerNumber=1 scan=26206	58.6875
31826:2	1	F.SYEVLTPLKWY.Q			699.869	2	1398.73	1398.73	0	-0.3	32	Non	610.42	383.46	383.46	9.09	1104	>sp|P02817|AMELX_BOVIN Amelogenin, X isoform OS=Bos taurus OX=9913 GN=AMELX PE=1 SV=2	1	hf1_eb_18273_84_20032023.ScanId;v=1;d1=26018.26018.2	controllerType=0 controllerNumber=1 scan=26018	58.3386
26779:2	1	F.SYEVLTPLK[+15.995]WY.Q		K[+16]	707.865	2	1414.72	1414.73	0	-1.7	32	Non	127.65	127.65	0	2.15	1104	>sp|P02817|AMELX_BOVIN Amelogenin, X isoform OS=Bos taurus OX=9913 GN=AMELX PE=1 SV=2	1	hf1_eb_18273_84_20032023.ScanId;v=1;d1=22493.22493.2	controllerType=0 controllerNumber=1 scan=22493	52.0919
30165:2	1	F.SYEVLTPLKW[+31.990]Y.Q		W[+32]	715.863	2	1430.72	1430.72	0	-0.7	32	Non	128.34	128.34	0	1.44	1104	>sp|P02817|AMELX_BOVIN Amelogenin, X isoform OS=Bos taurus OX=9913 GN=AMELX PE=1 SV=2	1	hf1_eb_18273_84_20032023.ScanId;v=1;d1=24863.24863.2	controllerType=0 controllerNumber=1 scan=24863	56.2759
35093:2	1	F.S[+79.966]YEVLTPLKWY.Q		S[+80]	739.851	2	1478.7	1478.7	0	-0.8	32	Non	141.47	141.47	141.47	2.25	1104	>sp|P02817|AMELX_BOVIN Amelogenin, X isoform OS=Bos taurus OX=9913 GN=AMELX PE=1 SV=2	1	hf1_eb_18273_84_20032023.ScanId;v=1;d1=28235.28235.2	controllerType=0 controllerNumber=1 scan=28235	62.3281
36325:2	1	F.S[+79.966]YEVLTPLKWY.Q		S[+80]	739.852	2	1478.7	1478.7	0	0.1	32	Non	187.83	187.83	187.83	3.23	1104	>sp|P02817|AMELX_BOVIN Amelogenin, X isoform OS=Bos taurus OX=9913 GN=AMELX PE=1 SV=2	1	hf1_eb_18273_84_20032023.ScanId;v=1;d1=29070.29070.2	controllerType=0 controllerNumber=1 scan=29070	63.811
29204:2	1	F.SYEVLTPLKW[+15.995]Y.Q		W[+16]	707.866	2	1414.72	1414.73	0	-0.9	32	Non	196.33	196.33	12.13	3.23	1104	>sp|P02817|AMELX_BOVIN Amelogenin, X isoform OS=Bos taurus OX=9913 GN=AMELX PE=1 SV=2	1	hf1_eb_18273_84_20032023.ScanId;v=1;d1=24166.24166.2	controllerType=0 controllerNumber=1 scan=24166	55.0306
33327:2	1	F.S[+79.966]YEVLTPLKWY.Q		S[+80]	739.852	2	1478.7	1478.7	0	0.7	32	Non	368.71	368.71	368.71	6.27	1104	>sp|P02817|AMELX_BOVIN Amelogenin, X isoform OS=Bos taurus OX=9913 GN=AMELX PE=1 SV=2	1	hf1_eb_18273_84_20032023.ScanId;v=1;d1=27039.27039.2	controllerType=0 controllerNumber=1 scan=27039	60.1802
27572:2	1	F.SYEVLTPLKW[+15.995]Y.Q		W[+16]	707.866	2	1414.72	1414.73	0	-0.8	32	Non	445.83	426.26	14.98	6.94	1104	>sp|P02817|AMELX_BOVIN Amelogenin, X isoform OS=Bos taurus OX=9913 GN=AMELX PE=1 SV=2	1	hf1_eb_18273_84_20032023.ScanId;v=1;d1=23036.23036.2	controllerType=0 controllerNumber=1 scan=23036	53.0433
28922:2	1	F.SYEVLTPLKW[+15.995]Y.Q		W[+16]	707.865	2	1414.72	1414.73	0	-1.7	32	Non	487.52	293.51	15.48	6.3	1104	>sp|P02817|AMELX_BOVIN Amelogenin, X isoform OS=Bos taurus OX=9913 GN=AMELX PE=1 SV=2	1	hf1_eb_18273_84_20032023.ScanId;v=1;d1=23974.23974.2	controllerType=0 controllerNumber=1 scan=23974	54.6877
33031:2	1	F.S[+79.966]YEVLTPLKWY.Q		S[+80]	739.852	2	1478.7	1478.7	0	0.6	32	Non	505.01	483.12	483.12	7.04	1104	>sp|P02817|AMELX_BOVIN Amelogenin, X isoform OS=Bos taurus OX=9913 GN=AMELX PE=1 SV=2	1	hf1_eb_18273_84_20032023.ScanId;v=1;d1=26841.26841.2	controllerType=0 controllerNumber=1 scan=26841	59.8262
36110:2	1	F.S[+79.966]YEVLTPLKWY.Q		S[+80]	739.852	2	1478.7	1478.7	0	0.1	32	Non	531.62	330.36	330.36	6.65	1104	>sp|P02817|AMELX_BOVIN Amelogenin, X isoform OS=Bos taurus OX=9913 GN=AMELX PE=1 SV=2	1	hf1_eb_18273_84_20032023.ScanId;v=1;d1=28932.28932.2	controllerType=0 controllerNumber=1 scan=28932	63.5737
32919:2	1	F.S[+79.966]YEVLTPLKW[+15.995]Y.Q		S[+80], W[+16]	747.85	2	1494.69	1494.69	0	0.6	32	Non	141.91	141.91	0	1.96	1104	>sp|P02817|AMELX_BOVIN Amelogenin, X isoform OS=Bos taurus OX=9913 GN=AMELX PE=1 SV=2	1	hf1_eb_18273_84_20032023.ScanId;v=1;d1=26765.26765.2	controllerType=0 controllerNumber=1 scan=26765	59.689
34553:2	1	F.S[+79.966]YEVLTPLKW[+31.990]Y.Q		S[+80], W[+32]	755.847	2	1510.69	1510.69	0	-0.3	32	Non	169.1	169.1	0	3.23	1104	>sp|P02817|AMELX_BOVIN Amelogenin, X isoform OS=Bos taurus OX=9913 GN=AMELX PE=1 SV=2	1	hf1_eb_18273_84_20032023.ScanId;v=1;d1=27864.27864.2	controllerType=0 controllerNumber=1 scan=27864	61.6604
31482:2	1	F.S[+79.966]YEVLTPLKWY[+15.995].Q		S[+80], Y[+16]	747.849	2	1494.69	1494.69	0	-0.4	32	Non	252.05	252.05	0	5.07	1104	>sp|P02817|AMELX_BOVIN Amelogenin, X isoform OS=Bos taurus OX=9913 GN=AMELX PE=1 SV=2	1	hf1_eb_18273_84_20032023.ScanId;v=1;d1=25768.25768.2	controllerType=0 controllerNumber=1 scan=25768	57.8822
30322:2	1	F.S[+79.966]YEVLTPLKW[+15.995]Y.Q		S[+80], W[+16]	747.85	2	1494.69	1494.69	0	0.3	32	Non	282.36	282.36	14.42	5.56	1104	>sp|P02817|AMELX_BOVIN Amelogenin, X isoform OS=Bos taurus OX=9913 GN=AMELX PE=1 SV=2	1	hf1_eb_18273_84_20032023.ScanId;v=1;d1=24976.24976.2	controllerType=0 controllerNumber=1 scan=24976	56.4825
33319:2	1	F.S[+79.966]YEVLTPLKW[+15.995]Y.Q		S[+80], W[+16]	747.85	2	1494.69	1494.69	0	0.6	32	Non	450.44	353.07	29.16	6.3	1104	>sp|P02817|AMELX_BOVIN Amelogenin, X isoform OS=Bos taurus OX=9913 GN=AMELX PE=1 SV=2	1	hf1_eb_18273_84_20032023.ScanId;v=1;d1=27035.27035.2	controllerType=0 controllerNumber=1 scan=27035	60.1742
32810:2	1	F.SYEVLTPLKWYQ[+0.984].S		Q[+1]	764.389	2	1527.77	1527.77	0	-1.3	32	Non	135.69	96.32	96.32	2.01	1104	>sp|P02817|AMELX_BOVIN Amelogenin, X isoform OS=Bos taurus OX=9913 GN=AMELX PE=1 SV=2	1	hf1_eb_18273_84_20032023.ScanId;v=1;d1=26694.26694.2	controllerType=0 controllerNumber=1 scan=26694	59.5622
30500:3	1	F.SYEVLTPLKWYQ[+0.984].S		Q[+1]	509.929	3	1527.77	1527.77	0	-0.1	32	Non	187.11	187.11	187.11	2.38	1104	>sp|P02817|AMELX_BOVIN Amelogenin, X isoform OS=Bos taurus OX=9913 GN=AMELX PE=1 SV=2	1	hf1_eb_18273_84_20032023.ScanId;v=1;d1=25102.25102.3	controllerType=0 controllerNumber=1 scan=25102	56.7027
[truncated: 1,866 more rows]

## Sheet: Proteins
Protein Rank	Description	|Log Prob|	Best |Log Prob|	Best score	Total Intensity	# of spectra	# of unique peptides	# of mod peptides	Coverage %	# AA's in protein	Protein DB number
[truncated: 4 more rows]
