# Supplementary material for: A Peptidomics Method for Assessing Sex from Modern and Ancient Bovine Tooth Enamel.
Source: Research Square preprint supplement (doi:10.21203/rs.3.rs-3766361/v1), 2024-01-29
Supplement: Supplementary file 7 [file a75f66f5e5f7f6d49a608656.xlsx]

## Sheet: Summary
Summary:
	1) Input data file: H:\Proteomics\Projects\Boaretto\INCPM_10472\Raw_files\HF1_10472_EBO_30_1_261219.raw
	2) Protein database: H:\Proteomics\Projects\Boaretto\INCPM_18273\AMELs Cattle fasta Pau 2.Fasta
	3) Parameter file: D:\Boaretto\HF1_10472_EBO_30_1_261219.raw_20230418_Amel\objs\params.prf
	4) Date/Time: April 18, 2023 12:16:28 PM IDT
	5) RunTime: 6 hours, 21 minutes, 34 seconds; on 34 cores
Summary Statistics:
	1) Reporting 2 forward and 2 reverse proteins
	2) 1796 unique forward peptides
	3) 4270 spectra matched to forward peptides
	4) Estimated spectrum-level FDR on true proteins is 0.2%
Recorded protein search configuration:
Num	Rule	Value
0	Protein database	H:\Proteomics\Projects\Boaretto\INCPM_18273\AMELs Cattle fasta Pau 2.Fasta
1	Spectrum-level FDR	Auto cut
2	Cleavage residues	KR
3	Digest cutter	C-terminal cutter
4	Peptide termini	Non specific
5	Maximum number of missed cleavages	Any missed cleavages (-1)
6	Precursor tolerance	10.0 ppm
7	Fragment tolerance	frag:qtof_hcd 20.0 ppm
8	Fragment tolerance version	2
9	Charges applied to charge-unassigned spectra:	1,2,3
10	Precursor mass max	7500.0
11	N-glycan search	None
12	O-glycan search	None
13	Off by x isotopes	-2,-1,0,+1,+2
14	Contaminants added	false
15	Decoys added	true
16	%Additional parameters:
17	Disulfide Enable	false
18	Trisulfide Enable	false
19	DSS Crosslink Enable	false
20	Custom Crosslink Enable	false
21	Wildcard Enable	0
22	Combyne cut off score	Auto
23	Protein FDR cutoff	1%
24	Focused DB created	true
25	Export mzIdentML	true
26	Score version	2
27	precursor_assignment_flags	2
28	po_NumberMonosReturn	2
29	Lock mass list	None
30	do_quick_rejects	0
31	%Modification searches:
32	common_modifications_max	2
33	rare_modifications_max	2
34	%Fixed and variable modifications:
35	Oxidation / +15.994915 @ F, H, K, M, P, W, Y | common2
36	Deamidated / +0.984016 @ N, Q, R | common2
37	Acetyl / +42.010565 @ Protein NTerm | rare1
38	Dioxidation / +31.989829 @ F, M, P, W, Y | rare2
39	Gln->pyro-Glu / -17.026549 @ Protein NTerm Q | rare1
40	Glu->pyro-Glu / -18.010565 @ Protein NTerm E | rare1
41	Phospho / +79.966331 @ S | rare1
42	% Custom modification text below
43	%Glycan modifications:
44	% Custom modification text below
45	Show all N-glycopeptides	0
46	%Addition parameters:
47	Product Version	PMI-Byonic-Com:v4.6.1
48	Registered to	david Morgenstern G-INCPM

## Sheet: Spectra
Query #:z	Protein Rank	Peptide < ProteinMetrics Confidential >	Glycans NHFAGNa	Modification Type(s)	Observed m/z	z	Observed (M+H)	Calc. mass (M+H)	Off-by-x error	Mass error (ppm)	Starting position	Cleavage	Score	Delta	Delta Mod	|Log Prob|	# of unique peptides	Protein Name	Protein DB number	Comment	Scan #	Scan Time
21079:4	1	T.W[+31.990]ILFACLLGAAFSMPLPPHPGHPGYINF.S		W[+32]	775.395	4	3098.56	3098.54	0	5.4	4	Non	287.51	1.74	1.74	2.3	1703	>sp|P02817|AMELX_BOVIN Amelogenin, X isoform OS=Bos taurus OX=9913 GN=AMELX PE=1 SV=2	1	hf1_10472_ebo_30_1_261219.ScanId;v=1;d1=16760.16760.4	controllerType=0 controllerNumber=1 scan=16760	37.1609
27876:6	1	T.WILFACLLGAAFSMPLPPHPGHPGYINFS[+79.966]YEVLTPLK.W		S[+80]	697.186	6	4178.08	4177.09	1	-3	4	NRagged	333.54	182.16	121.12	3.66	1703	>sp|P02817|AMELX_BOVIN Amelogenin, X isoform OS=Bos taurus OX=9913 GN=AMELX PE=1 SV=2	1	hf1_10472_ebo_30_1_261219.ScanId;v=1;d1=21318.21318.4	controllerType=0 controllerNumber=1 scan=21318	44.8839
27788:6	1	T.WILFACLLGAAFSMPLPPHPGHPGYINFS[+79.966]YEVLTPLK.W		S[+80]	697.02	6	4177.08	4177.09	0	-1.8	4	NRagged	352.25	194.73	110.62	3.65	1703	>sp|P02817|AMELX_BOVIN Amelogenin, X isoform OS=Bos taurus OX=9913 GN=AMELX PE=1 SV=2	1	hf1_10472_ebo_30_1_261219.ScanId;v=1;d1=21258.21258.6	controllerType=0 controllerNumber=1 scan=21258	44.781
28710:6	1	T.WILFACLLGAAFSMPLPPHPGHPGYIN[+0.984]FS[+79.966]YEVLTPLK.W		N[+1], S[+80]	697.185	6	4178.08	4178.07	0	0.9	4	NRagged	314.82	71.81	71.81	2.64	1703	>sp|P02817|AMELX_BOVIN Amelogenin, X isoform OS=Bos taurus OX=9913 GN=AMELX PE=1 SV=2	1	hf1_10472_ebo_30_1_261219.ScanId;v=1;d1=21856.21856.6	controllerType=0 controllerNumber=1 scan=21856	45.8196
29233:6	1	T.W[+15.995]ILFACLLGAAF[+31.990]SMPLPPHPGHPGYIN[+0.984]FS[+79.966]YEVLTPLK.W		F[+32], N[+1], S[+80], W[+16]	705.011	6	4225.03	4226.06	-1	-5.6	4	NRagged	200.53	17.48	9.33	0.87	1703	>sp|P02817|AMELX_BOVIN Amelogenin, X isoform OS=Bos taurus OX=9913 GN=AMELX PE=1 SV=2	1	hf1_10472_ebo_30_1_261219.ScanId;v=1;d1=22188.22188.3	controllerType=0 controllerNumber=1 scan=22188	46.4404
35443:6	1	I.LF[+31.990]ACLLGAAFSMPLPPHPGHPGYINFSYEVLTPLKWY[+15.995]QSMIRHPYP.S		F[+32], Y[+16]	884.952	6	5304.68	5304.63	0	8.9	6	Non	170.13	170.13	15.31	2.57	1703	>sp|P02817|AMELX_BOVIN Amelogenin, X isoform OS=Bos taurus OX=9913 GN=AMELX PE=1 SV=2	1	hf1_10472_ebo_30_1_261219.ScanId;v=1;d1=26350.26350.6	controllerType=0 controllerNumber=1 scan=26350	54.0462
37038:6	1	I.LF[+31.990]ACLLGAAFSMPLPPHPGHPGYINFSYEVLTPLKWY[+15.995]Q[+0.984]SMIRHPYP.S		F[+32], Q[+1], Y[+16]	884.943	6	5304.62	5305.61	-1	1.9	6	Non	210.85	210.85	8.04	2.94	1703	>sp|P02817|AMELX_BOVIN Amelogenin, X isoform OS=Bos taurus OX=9913 GN=AMELX PE=1 SV=2	1	hf1_10472_ebo_30_1_261219.ScanId;v=1;d1=27367.27367.3	controllerType=0 controllerNumber=1 scan=27367	55.8782
31886:5	1	L.FACLLGAAFSMPLPPHPGHPGYINFS[+79.966]YEVLTPLKWYQ[+0.984]SM[+15.995]IR.H		M[+16], Q[+1], S[+80]	950.057	5	4746.26	4746.28	0	-4.5	7	NRagged	376	376	27.7	5.36	1703	>sp|P02817|AMELX_BOVIN Amelogenin, X isoform OS=Bos taurus OX=9913 GN=AMELX PE=1 SV=2	1	hf1_10472_ebo_30_1_261219.ScanId;v=1;d1=23975.23975.4	controllerType=0 controllerNumber=1 scan=23975	49.6989
31774:5	1	L.FACLLGAAFSMPLPPHPGHP[+31.990]GY[+31.990]IN[+0.984]FSYEVLTPLKWYQSM[+15.995]IR.H		M[+16], N[+1], P[+32], Y[+32]	946.656	5	4729.25	4730.29	-1	-7.8	7	NRagged	234.85	234.85	4.16	2.25	1703	>sp|P02817|AMELX_BOVIN Amelogenin, X isoform OS=Bos taurus OX=9913 GN=AMELX PE=1 SV=2	1	hf1_10472_ebo_30_1_261219.ScanId;v=1;d1=23900.23900.4	controllerType=0 controllerNumber=1 scan=23900	49.5688
43440:6	1	L.F[+31.990]ACLLGAAF[+15.995]S[+79.966]MPLPPHPGHPGYINFSYEVLTPLKWYQ[+0.984]SMIRHPYP.S		F[+16][+32], Q[+1], S[+80]	879.42	6	5271.49	5272.5	-1	-1.3	7	Non	149.75	149.75	0	2.29	1703	>sp|P02817|AMELX_BOVIN Amelogenin, X isoform OS=Bos taurus OX=9913 GN=AMELX PE=1 SV=2	1	hf1_10472_ebo_30_1_261219.ScanId;v=1;d1=31467.31467.3	controllerType=0 controllerNumber=1 scan=31467	63.215
32283:6	1	G.AAFS[+79.966]MPLPP[+15.995]HPGHPGYINFSYEVLTPLKWYQSM[+15.995]IRH.P		M[+16], P[+16], S[+80]	716.679	6	4295.04	4294.04	1	-2	13	Non	175.06	175.06	0	3.14	1703	>sp|P02817|AMELX_BOVIN Amelogenin, X isoform OS=Bos taurus OX=9913 GN=AMELX PE=1 SV=2	1	hf1_10472_ebo_30_1_261219.ScanId;v=1;d1=24246.24246.3	controllerType=0 controllerNumber=1 scan=24246	50.185
17129:3	1	A.FSMPLPPHPGHPGYIN[+0.984]F.S		N[+1]	636.972	3	1908.9	1908.91	0	-4	15	Non	214.44	214.44	214.44	2.38	1703	>sp|P02817|AMELX_BOVIN Amelogenin, X isoform OS=Bos taurus OX=9913 GN=AMELX PE=1 SV=2	1	hf1_10472_ebo_30_1_261219.ScanId;v=1;d1=13953.13953.3	controllerType=0 controllerNumber=1 scan=13953	32.2844
07677:2	1	F.SM[+15.995]PLPPHPG.H		M[+16]	474.736	2	948.464	948.461	0	3.8	16	Non	181.76	181.76	131.34	1.3	1703	>sp|P02817|AMELX_BOVIN Amelogenin, X isoform OS=Bos taurus OX=9913 GN=AMELX PE=1 SV=2	1	hf1_10472_ebo_30_1_261219.ScanId;v=1;d1=7414.7414.2	controllerType=0 controllerNumber=1 scan=7414	21.1403
08521:2	1	F.SM[+15.995]PLPPHPG.H		M[+16]	474.737	2	948.467	948.461	0	6.5	16	Non	212.93	212.93	177.77	2.29	1703	>sp|P02817|AMELX_BOVIN Amelogenin, X isoform OS=Bos taurus OX=9913 GN=AMELX PE=1 SV=2	1	hf1_10472_ebo_30_1_261219.ScanId;v=1;d1=8001.8001.2	controllerType=0 controllerNumber=1 scan=8001	22.1277
08186:2	1	F.SM[+15.995]PLPPHPG.H		M[+16]	474.737	2	948.467	948.461	0	6.2	16	Non	287.23	287.23	173.45	3.94	1703	>sp|P02817|AMELX_BOVIN Amelogenin, X isoform OS=Bos taurus OX=9913 GN=AMELX PE=1 SV=2	1	hf1_10472_ebo_30_1_261219.ScanId;v=1;d1=7773.7773.2	controllerType=0 controllerNumber=1 scan=7773	21.7472
06677:3	1	F.SM[+15.995]PLPPHPGHP.G		M[+16]	394.864	3	1182.58	1182.57	0	5.2	16	Non	222.11	166.2	52.77	2.74	1703	>sp|P02817|AMELX_BOVIN Amelogenin, X isoform OS=Bos taurus OX=9913 GN=AMELX PE=1 SV=2	1	hf1_10472_ebo_30_1_261219.ScanId;v=1;d1=6710.6710.3	controllerType=0 controllerNumber=1 scan=6710	19.9627
06508:3	1	F.SM[+15.995]PLPPHPGHPG.Y		M[+16]	413.872	3	1239.6	1239.59	0	5.4	16	Non	229.43	229.43	101.72	2.54	1703	>sp|P02817|AMELX_BOVIN Amelogenin, X isoform OS=Bos taurus OX=9913 GN=AMELX PE=1 SV=2	1	hf1_10472_ebo_30_1_261219.ScanId;v=1;d1=6591.6591.3	controllerType=0 controllerNumber=1 scan=6591	19.7604
18526:3	1	F.SM[+15.995]PLPPHPGHPGYINF.S		M[+16]	592.958	3	1776.86	1776.85	0	3.1	16	Non	232.18	46.19	46.19	0.86	1703	>sp|P02817|AMELX_BOVIN Amelogenin, X isoform OS=Bos taurus OX=9913 GN=AMELX PE=1 SV=2	1	hf1_10472_ebo_30_1_261219.ScanId;v=1;d1=14982.14982.3	controllerType=0 controllerNumber=1 scan=14982	34.1114
17863:2	1	F.SM[+15.995]PLPPHPGHPGYINF.S		M[+16]	888.936	2	1776.87	1776.85	0	7.2	16	Non	374.28	97.94	97.94	3.22	1703	>sp|P02817|AMELX_BOVIN Amelogenin, X isoform OS=Bos taurus OX=9913 GN=AMELX PE=1 SV=2	1	hf1_10472_ebo_30_1_261219.ScanId;v=1;d1=14503.14503.2	controllerType=0 controllerNumber=1 scan=14503	33.2618
18172:2	1	F.SM[+15.995]PLPPHPGHPGYINF.S		M[+16]	888.93	2	1776.85	1776.85	0	0.2	16	Non	430.17	135.93	135.93	3.03	1703	>sp|P02817|AMELX_BOVIN Amelogenin, X isoform OS=Bos taurus OX=9913 GN=AMELX PE=1 SV=2	1	hf1_10472_ebo_30_1_261219.ScanId;v=1;d1=14730.14730.2	controllerType=0 controllerNumber=1 scan=14730	33.665
31735:3	1	F.SMPLPPHPGHPGYIN[+0.984]FS[+79.966]YEVLTPLK.W		N[+1], S[+80]	958.126	3	2872.36	2872.38	0	-4.7	16	NRagged	181.62	181.62	67.22	1.36	1703	>sp|P02817|AMELX_BOVIN Amelogenin, X isoform OS=Bos taurus OX=9913 GN=AMELX PE=1 SV=2	1	hf1_10472_ebo_30_1_261219.ScanId;v=1;d1=23873.23873.3	controllerType=0 controllerNumber=1 scan=23873	49.5202
27186:3	1	F.SM[+15.995]PLPPHPGHPGYINFS[+79.966]YEVLTPLK.W		M[+16], S[+80]	963.132	3	2887.38	2887.39	0	-2.2	16	NRagged	311.76	311.76	118.14	4.89	1703	>sp|P02817|AMELX_BOVIN Amelogenin, X isoform OS=Bos taurus OX=9913 GN=AMELX PE=1 SV=2	1	hf1_10472_ebo_30_1_261219.ScanId;v=1;d1=20842.20842.3	controllerType=0 controllerNumber=1 scan=20842	44.0639
26514:3	1	F.SM[+15.995]PLPPHPGHPGYINFS[+79.966]YEVLTPLK.W		M[+16], S[+80]	963.139	3	2887.4	2887.39	0	5	16	NRagged	661.52	661.52	179.16	10.77	1703	>sp|P02817|AMELX_BOVIN Amelogenin, X isoform OS=Bos taurus OX=9913 GN=AMELX PE=1 SV=2	1	hf1_10472_ebo_30_1_261219.ScanId;v=1;d1=20395.20395.3	controllerType=0 controllerNumber=1 scan=20395	43.3062
32238:3	1	F.SM[+15.995]PLPPHPGHPGYINFS[+79.966]YEVLTPLKWY.Q		M[+16], S[+80]	1079.53	3	3236.56	3236.53	0	9.9	16	Non	276.3	276.3	134.14	5.3	1703	>sp|P02817|AMELX_BOVIN Amelogenin, X isoform OS=Bos taurus OX=9913 GN=AMELX PE=1 SV=2	1	hf1_10472_ebo_30_1_261219.ScanId;v=1;d1=24213.24213.3	controllerType=0 controllerNumber=1 scan=24213	50.1241
32272:3	1	F.SM[+15.995]PLPPHPGHPGYINFS[+79.966]YEVLTPLKWY.Q		M[+16], S[+80]	1079.52	3	3236.55	3236.53	0	7.2	16	Non	352.51	352.51	149.61	6.19	1703	>sp|P02817|AMELX_BOVIN Amelogenin, X isoform OS=Bos taurus OX=9913 GN=AMELX PE=1 SV=2	1	hf1_10472_ebo_30_1_261219.ScanId;v=1;d1=24237.24237.3	controllerType=0 controllerNumber=1 scan=24237	50.1659
32591:3	1	F.SM[+15.995]PLPPHPGHP[+15.995]GY[+31.990]INFSY[+31.990]EVLTPLKWY.Q		M[+16], P[+16], Y[+32]*2	1079.53	3	3236.56	3236.54	0	6.9	16	Non	126.17	126.17	0.26	2.02	1703	>sp|P02817|AMELX_BOVIN Amelogenin, X isoform OS=Bos taurus OX=9913 GN=AMELX PE=1 SV=2	1	hf1_10472_ebo_30_1_261219.ScanId;v=1;d1=24452.24452.3	controllerType=0 controllerNumber=1 scan=24452	50.5514
09683:1	1	S.M[+15.995]PLPP.H		M[+16]	570.299	1	570.299	570.296	0	6.1	17	Non	312.59	26.39	26.39	2.4	1703	>sp|P02817|AMELX_BOVIN Amelogenin, X isoform OS=Bos taurus OX=9913 GN=AMELX PE=1 SV=2	1	hf1_10472_ebo_30_1_261219.ScanId;v=1;d1=8770.8770.2	controllerType=0 controllerNumber=1 scan=8770	23.4485
09974:1	1	S.M[+15.995]PLPP.H		M[+16]	570.299	1	570.299	570.296	0	6.5	17	Non	316.33	36.02	36.02	2.38	1703	>sp|P02817|AMELX_BOVIN Amelogenin, X isoform OS=Bos taurus OX=9913 GN=AMELX PE=1 SV=2	1	hf1_10472_ebo_30_1_261219.ScanId;v=1;d1=8973.8973.2	controllerType=0 controllerNumber=1 scan=8973	23.8014
04854:1	1	S.M[+15.995]PLPPH.P		M[+16]	707.359	1	707.359	707.355	0	5.9	17	Non	260.43	260.43	46.79	4.06	1703	>sp|P02817|AMELX_BOVIN Amelogenin, X isoform OS=Bos taurus OX=9913 GN=AMELX PE=1 SV=2	1	hf1_10472_ebo_30_1_261219.ScanId;v=1;d1=5427.5427.2	controllerType=0 controllerNumber=1 scan=5427	17.7911
05544:1	1	S.M[+15.995]PLPPH.P		M[+16]	707.359	1	707.359	707.355	0	6.3	17	Non	299.24	260.09	53.54	4.26	1703	>sp|P02817|AMELX_BOVIN Amelogenin, X isoform OS=Bos taurus OX=9913 GN=AMELX PE=1 SV=2	1	hf1_10472_ebo_30_1_261219.ScanId;v=1;d1=5911.5911.2	controllerType=0 controllerNumber=1 scan=5911	18.6196
14064:2	1	S.MPLPPHP.G			394.712	2	788.416	788.412	0	4.9	17	Non	392.73	231.52	231.52	3.96	1703	>sp|P02817|AMELX_BOVIN Amelogenin, X isoform OS=Bos taurus OX=9913 GN=AMELX PE=1 SV=2	1	hf1_10472_ebo_30_1_261219.ScanId;v=1;d1=11783.11783.2	controllerType=0 controllerNumber=1 scan=11783	28.6051
09060:1	1	S.M[+15.995]PLPPHP.G		M[+16]	804.414	1	804.414	804.407	0	8.2	17	Non	185.35	185.35	41.34	2.5	1703	>sp|P02817|AMELX_BOVIN Amelogenin, X isoform OS=Bos taurus OX=9913 GN=AMELX PE=1 SV=2	1	hf1_10472_ebo_30_1_261219.ScanId;v=1;d1=8360.8360.2	controllerType=0 controllerNumber=1 scan=8360	22.7435
09352:1	1	S.M[+15.995]PLPPHP.G		M[+16]	804.413	1	804.413	804.407	0	6.5	17	Non	192.48	192.48	19.49	2.28	1703	>sp|P02817|AMELX_BOVIN Amelogenin, X isoform OS=Bos taurus OX=9913 GN=AMELX PE=1 SV=2	1	hf1_10472_ebo_30_1_261219.ScanId;v=1;d1=8556.8556.2	controllerType=0 controllerNumber=1 scan=8556	23.0858
10176:1	1	S.M[+15.995]PLPPHP.G		M[+16]	804.413	1	804.413	804.407	0	7.6	17	Non	229.06	209.12	26.02	2.37	1703	>sp|P02817|AMELX_BOVIN Amelogenin, X isoform OS=Bos taurus OX=9913 GN=AMELX PE=1 SV=2	1	hf1_10472_ebo_30_1_261219.ScanId;v=1;d1=9115.9115.2	controllerType=0 controllerNumber=1 scan=9115	24.0432
10684:2	1	S.M[+31.990]PLPPHP.G		M[+32]	410.707	2	820.407	820.402	0	6.1	17	Non	235.11	235.11	8.43	2.31	1703	>sp|P02817|AMELX_BOVIN Amelogenin, X isoform OS=Bos taurus OX=9913 GN=AMELX PE=1 SV=2	1	hf1_10472_ebo_30_1_261219.ScanId;v=1;d1=9478.9478.3	controllerType=0 controllerNumber=1 scan=9478	24.6514
10750:2	1	S.M[+15.995]PLPPHP.G		M[+16]	402.71	2	804.412	804.407	0	6.2	17	Non	236.53	159.7	58.92	1.24	1703	>sp|P02817|AMELX_BOVIN Amelogenin, X isoform OS=Bos taurus OX=9913 GN=AMELX PE=1 SV=2	1	hf1_10472_ebo_30_1_261219.ScanId;v=1;d1=9521.9521.3	controllerType=0 controllerNumber=1 scan=9521	24.7209
11589:2	1	S.M[+15.995]PLPPHP.G		M[+16]	402.71	2	804.412	804.407	0	5.8	17	Non	283.35	189.14	39.19	3.53	1703	>sp|P02817|AMELX_BOVIN Amelogenin, X isoform OS=Bos taurus OX=9913 GN=AMELX PE=1 SV=2	1	hf1_10472_ebo_30_1_261219.ScanId;v=1;d1=10097.10097.2	controllerType=0 controllerNumber=1 scan=10097	25.721
11350:2	1	S.M[+31.990]PLPPHP.G		M[+32]	410.707	2	820.406	820.402	0	4.9	17	Non	293.11	253.81	4.41	4.05	1703	>sp|P02817|AMELX_BOVIN Amelogenin, X isoform OS=Bos taurus OX=9913 GN=AMELX PE=1 SV=2	1	hf1_10472_ebo_30_1_261219.ScanId;v=1;d1=9935.9935.2	controllerType=0 controllerNumber=1 scan=9935	25.4403
09010:1	1	S.M[+15.995]PLPPHP.G		M[+16]	804.413	1	804.413	804.407	0	7.2	17	Non	299.44	242.5	53.17	4.09	1703	>sp|P02817|AMELX_BOVIN Amelogenin, X isoform OS=Bos taurus OX=9913 GN=AMELX PE=1 SV=2	1	hf1_10472_ebo_30_1_261219.ScanId;v=1;d1=8327.8327.2	controllerType=0 controllerNumber=1 scan=8327	22.6884
09680:1	1	S.M[+15.995]PLPPHP.G		M[+16]	804.412	1	804.412	804.407	0	5.7	17	Non	313.06	158.3	47.18	2.83	1703	>sp|P02817|AMELX_BOVIN Amelogenin, X isoform OS=Bos taurus OX=9913 GN=AMELX PE=1 SV=2	1	hf1_10472_ebo_30_1_261219.ScanId;v=1;d1=8768.8768.2	controllerType=0 controllerNumber=1 scan=8768	23.4468
11060:2	1	S.M[+31.990]PLPPHP.G		M[+32]	410.708	2	820.408	820.402	0	7.2	17	Non	328.86	269.36	28	3.92	1703	>sp|P02817|AMELX_BOVIN Amelogenin, X isoform OS=Bos taurus OX=9913 GN=AMELX PE=1 SV=2	1	hf1_10472_ebo_30_1_261219.ScanId;v=1;d1=9738.9738.2	controllerType=0 controllerNumber=1 scan=9738	25.0974
10186:2	1	S.M[+31.990]PLPPHP.G		M[+32]	410.707	2	820.408	820.402	0	6.4	17	Non	332.52	192.26	38.99	3.4	1703	>sp|P02817|AMELX_BOVIN Amelogenin, X isoform OS=Bos taurus OX=9913 GN=AMELX PE=1 SV=2	1	hf1_10472_ebo_30_1_261219.ScanId;v=1;d1=9122.9122.2	controllerType=0 controllerNumber=1 scan=9122	24.055
07928:2	1	S.M[+15.995]PLPPHP.G		M[+16]	402.709	2	804.412	804.407	0	5.5	17	Non	356.99	177.18	73.7	3.78	1703	>sp|P02817|AMELX_BOVIN Amelogenin, X isoform OS=Bos taurus OX=9913 GN=AMELX PE=1 SV=2	1	hf1_10472_ebo_30_1_261219.ScanId;v=1;d1=7589.7589.2	controllerType=0 controllerNumber=1 scan=7589	21.4344
10472:2	1	S.M[+31.990]PLPPHP.G		M[+32]	410.707	2	820.407	820.402	0	6.1	17	Non	366.77	226.44	34.14	3.94	1703	>sp|P02817|AMELX_BOVIN Amelogenin, X isoform OS=Bos taurus OX=9913 GN=AMELX PE=1 SV=2	1	hf1_10472_ebo_30_1_261219.ScanId;v=1;d1=9328.9328.2	controllerType=0 controllerNumber=1 scan=9328	24.3964
10770:2	1	S.M[+31.990]PLPPHP.G		M[+32]	410.707	2	820.407	820.402	0	6.1	17	Non	376.57	228.63	39.15	3.94	1703	>sp|P02817|AMELX_BOVIN Amelogenin, X isoform OS=Bos taurus OX=9913 GN=AMELX PE=1 SV=2	1	hf1_10472_ebo_30_1_261219.ScanId;v=1;d1=9533.9533.2	controllerType=0 controllerNumber=1 scan=9533	24.7401
10898:2	1	S.M[+15.995]PLPPHP.G		M[+16]	402.71	2	804.413	804.407	0	6.6	17	Non	400.8	247.02	78.64	4.13	1703	>sp|P02817|AMELX_BOVIN Amelogenin, X isoform OS=Bos taurus OX=9913 GN=AMELX PE=1 SV=2	1	hf1_10472_ebo_30_1_261219.ScanId;v=1;d1=9623.9623.2	controllerType=0 controllerNumber=1 scan=9623	24.8978
10021:2	1	S.M[+15.995]PLPPHP.G		M[+16]	402.71	2	804.412	804.407	0	5.9	17	Non	403.22	253.14	81.9	4.35	1703	>sp|P02817|AMELX_BOVIN Amelogenin, X isoform OS=Bos taurus OX=9913 GN=AMELX PE=1 SV=2	1	hf1_10472_ebo_30_1_261219.ScanId;v=1;d1=9007.9007.2	controllerType=0 controllerNumber=1 scan=9007	23.8613
09743:2	1	S.M[+15.995]PLPPHP.G		M[+16]	402.71	2	804.413	804.407	0	6.5	17	Non	413.1	240.88	86.01	4.14	1703	>sp|P02817|AMELX_BOVIN Amelogenin, X isoform OS=Bos taurus OX=9913 GN=AMELX PE=1 SV=2	1	hf1_10472_ebo_30_1_261219.ScanId;v=1;d1=8813.8813.2	controllerType=0 controllerNumber=1 scan=8813	23.5233
10594:2	1	S.M[+15.995]PLPPHP.G		M[+16]	402.71	2	804.412	804.407	0	5.8	17	Non	428.99	257.89	86.38	4.21	1703	>sp|P02817|AMELX_BOVIN Amelogenin, X isoform OS=Bos taurus OX=9913 GN=AMELX PE=1 SV=2	1	hf1_10472_ebo_30_1_261219.ScanId;v=1;d1=9415.9415.2	controllerType=0 controllerNumber=1 scan=9415	24.545
09129:2	1	S.M[+15.995]PLPPHP.G		M[+16]	402.711	2	804.414	804.407	0	8.2	17	Non	434.31	237.3	86.01	3.93	1703	>sp|P02817|AMELX_BOVIN Amelogenin, X isoform OS=Bos taurus OX=9913 GN=AMELX PE=1 SV=2	1	hf1_10472_ebo_30_1_261219.ScanId;v=1;d1=8407.8407.2	controllerType=0 controllerNumber=1 scan=8407	22.8264
10322:2	1	S.M[+15.995]PLPPHP.G		M[+16]	402.709	2	804.411	804.407	0	4.1	17	Non	443.7	269.67	90.17	3.52	1703	>sp|P02817|AMELX_BOVIN Amelogenin, X isoform OS=Bos taurus OX=9913 GN=AMELX PE=1 SV=2	1	hf1_10472_ebo_30_1_261219.ScanId;v=1;d1=9216.9216.2	controllerType=0 controllerNumber=1 scan=9216	24.2025
09436:2	1	S.M[+15.995]PLPPHP.G		M[+16]	402.71	2	804.413	804.407	0	7.4	17	Non	448.83	280.19	89.07	4.34	1703	>sp|P02817|AMELX_BOVIN Amelogenin, X isoform OS=Bos taurus OX=9913 GN=AMELX PE=1 SV=2	1	hf1_10472_ebo_30_1_261219.ScanId;v=1;d1=8611.8611.2	controllerType=0 controllerNumber=1 scan=8611	23.1803
08511:2	1	S.M[+15.995]PLPPHP.G		M[+16]	402.71	2	804.413	804.407	0	6.5	17	Non	459.36	269.21	120.13	4.21	1703	>sp|P02817|AMELX_BOVIN Amelogenin, X isoform OS=Bos taurus OX=9913 GN=AMELX PE=1 SV=2	1	hf1_10472_ebo_30_1_261219.ScanId;v=1;d1=7993.7993.2	controllerType=0 controllerNumber=1 scan=7993	22.1193
08209:2	1	S.M[+15.995]PLPPHP.G		M[+16]	402.71	2	804.412	804.407	0	6.3	17	Non	460.17	292.41	96.97	4.24	1703	>sp|P02817|AMELX_BOVIN Amelogenin, X isoform OS=Bos taurus OX=9913 GN=AMELX PE=1 SV=2	1	hf1_10472_ebo_30_1_261219.ScanId;v=1;d1=7790.7790.2	controllerType=0 controllerNumber=1 scan=7790	21.7748
08818:2	1	S.M[+15.995]PLPPHP.G		M[+16]	402.71	2	804.413	804.407	0	6.8	17	Non	467.51	327.21	100.39	4.3	1703	>sp|P02817|AMELX_BOVIN Amelogenin, X isoform OS=Bos taurus OX=9913 GN=AMELX PE=1 SV=2	1	hf1_10472_ebo_30_1_261219.ScanId;v=1;d1=8201.8201.2	controllerType=0 controllerNumber=1 scan=8201	22.4726
06485:2	1	S.M[+15.995]PLPPH[+15.995]P.G		H[+16], M[+16]	410.707	2	820.407	820.402	0	5.8	17	Non	218.7	176.09	18.98	1.24	1703	>sp|P02817|AMELX_BOVIN Amelogenin, X isoform OS=Bos taurus OX=9913 GN=AMELX PE=1 SV=2	1	hf1_10472_ebo_30_1_261219.ScanId;v=1;d1=6576.6576.2	controllerType=0 controllerNumber=1 scan=6576	19.7368
49123:2	1	S.MPLPPHPG.H			423.223	2	845.438	845.434	0	5.3	17	Non	207.5	207.5	207.5	2.31	1703	>sp|P02817|AMELX_BOVIN Amelogenin, X isoform OS=Bos taurus OX=9913 GN=AMELX PE=1 SV=2	1	hf1_10472_ebo_30_1_261219.ScanId;v=1;d1=35641.35641.2	controllerType=0 controllerNumber=1 scan=35641	71.8626
12291:2	1	S.MPLPPHPG.H			423.223	2	845.438	845.434	0	5	17	Non	258.03	253.18	253.18	3.79	1703	>sp|P02817|AMELX_BOVIN Amelogenin, X isoform OS=Bos taurus OX=9913 GN=AMELX PE=1 SV=2	1	hf1_10472_ebo_30_1_261219.ScanId;v=1;d1=10585.10585.2	controllerType=0 controllerNumber=1 scan=10585	26.5692
12799:1	1	S.MPLPPHPG.H			845.439	1	845.439	845.434	0	6.4	17	Non	262.47	234.78	234.78	3.8	1703	>sp|P02817|AMELX_BOVIN Amelogenin, X isoform OS=Bos taurus OX=9913 GN=AMELX PE=1 SV=2	1	hf1_10472_ebo_30_1_261219.ScanId;v=1;d1=10927.10927.2	controllerType=0 controllerNumber=1 scan=10927	27.1569
12948:1	1	S.MPLPPHPG.H			845.44	1	845.44	845.434	0	7.7	17	Non	314.19	276.92	276.92	4.09	1703	>sp|P02817|AMELX_BOVIN Amelogenin, X isoform OS=Bos taurus OX=9913 GN=AMELX PE=1 SV=2	1	hf1_10472_ebo_30_1_261219.ScanId;v=1;d1=11028.11028.2	controllerType=0 controllerNumber=1 scan=11028	27.3298
00139:2	1	S.MPLPPHPG.H			423.222	2	845.436	845.434	0	2.4	17	Non	349.85	349.85	349.85	3.89	1703	>sp|P02817|AMELX_BOVIN Amelogenin, X isoform OS=Bos taurus OX=9913 GN=AMELX PE=1 SV=2	1	hf1_10472_ebo_30_1_261219.ScanId;v=1;d1=159.159.2	controllerType=0 controllerNumber=1 scan=159	0.533
12578:2	1	S.MPLPPHPG.H			423.223	2	845.438	845.434	0	5.4	17	Non	382.15	379.42	379.42	5.43	1703	>sp|P02817|AMELX_BOVIN Amelogenin, X isoform OS=Bos taurus OX=9913 GN=AMELX PE=1 SV=2	1	hf1_10472_ebo_30_1_261219.ScanId;v=1;d1=10782.10782.2	controllerType=0 controllerNumber=1 scan=10782	26.9109
14132:2	1	S.MPLPPHPG.H			423.223	2	845.438	845.434	0	4.8	17	Non	403.3	283.33	283.33	4.33	1703	>sp|P02817|AMELX_BOVIN Amelogenin, X isoform OS=Bos taurus OX=9913 GN=AMELX PE=1 SV=2	1	hf1_10472_ebo_30_1_261219.ScanId;v=1;d1=11833.11833.2	controllerType=0 controllerNumber=1 scan=11833	28.6922
13796:2	1	S.MPLPPHPG.H			423.222	2	845.438	845.434	0	4.3	17	Non	407.74	390.56	390.56	5.38	1703	>sp|P02817|AMELX_BOVIN Amelogenin, X isoform OS=Bos taurus OX=9913 GN=AMELX PE=1 SV=2	1	hf1_10472_ebo_30_1_261219.ScanId;v=1;d1=11598.11598.2	controllerType=0 controllerNumber=1 scan=11598	28.3017
12891:2	1	S.MPLPPHPG.H			423.223	2	845.439	845.434	0	6.1	17	Non	411.83	325.8	325.8	4.54	1703	>sp|P02817|AMELX_BOVIN Amelogenin, X isoform OS=Bos taurus OX=9913 GN=AMELX PE=1 SV=2	1	hf1_10472_ebo_30_1_261219.ScanId;v=1;d1=10987.10987.2	controllerType=0 controllerNumber=1 scan=10987	27.2614
13478:2	1	S.MPLPPHPG.H			423.223	2	845.439	845.434	0	6.2	17	Non	413.78	337.84	337.84	4.44	1703	>sp|P02817|AMELX_BOVIN Amelogenin, X isoform OS=Bos taurus OX=9913 GN=AMELX PE=1 SV=2	1	hf1_10472_ebo_30_1_261219.ScanId;v=1;d1=11389.11389.2	controllerType=0 controllerNumber=1 scan=11389	27.9536
13182:2	1	S.MPLPPHPG.H			423.223	2	845.439	845.434	0	6.2	17	Non	417.48	349.64	349.64	4.54	1703	>sp|P02817|AMELX_BOVIN Amelogenin, X isoform OS=Bos taurus OX=9913 GN=AMELX PE=1 SV=2	1	hf1_10472_ebo_30_1_261219.ScanId;v=1;d1=11186.11186.2	controllerType=0 controllerNumber=1 scan=11186	27.606
50355:2	1	S.M[+15.995]PLPPHPG.H		M[+16]	431.22	2	861.433	861.429	0	4.6	17	Non	75.33	75.33	32.08	1.3	1703	>sp|P02817|AMELX_BOVIN Amelogenin, X isoform OS=Bos taurus OX=9913 GN=AMELX PE=1 SV=2	1	hf1_10472_ebo_30_1_261219.ScanId;v=1;d1=36904.36904.3	controllerType=0 controllerNumber=1 scan=36904	76.049
47151:2	1	S.M[+15.995]PLPPHPG.H		M[+16]	431.22	2	861.433	861.429	0	5	17	Non	101.83	101.83	30.99	1.3	1703	>sp|P02817|AMELX_BOVIN Amelogenin, X isoform OS=Bos taurus OX=9913 GN=AMELX PE=1 SV=2	1	hf1_10472_ebo_30_1_261219.ScanId;v=1;d1=34184.34184.2	controllerType=0 controllerNumber=1 scan=34184	68.7963
50327:2	1	S.M[+15.995]PLPPHPG.H		M[+16]	431.221	2	861.435	861.429	0	6.8	17	Non	120.24	120.24	25.79	1.34	1703	>sp|P02817|AMELX_BOVIN Amelogenin, X isoform OS=Bos taurus OX=9913 GN=AMELX PE=1 SV=2	1	hf1_10472_ebo_30_1_261219.ScanId;v=1;d1=36734.36734.2	controllerType=0 controllerNumber=1 scan=36734	75.0762
07727:1	1	S.M[+15.995]PLPPHPG.H		M[+16]	861.434	1	861.434	861.429	0	5.6	17	Non	152.14	152.14	19.26	2.04	1703	>sp|P02817|AMELX_BOVIN Amelogenin, X isoform OS=Bos taurus OX=9913 GN=AMELX PE=1 SV=2	1	hf1_10472_ebo_30_1_261219.ScanId;v=1;d1=7448.7448.2	controllerType=0 controllerNumber=1 scan=7448	21.1982
00099:2	1	S.M[+15.995]PLPPHPG.H		M[+16]	431.22	2	861.433	861.429	0	4.6	17	Non	155.71	155.71	25.68	1.7	1703	>sp|P02817|AMELX_BOVIN Amelogenin, X isoform OS=Bos taurus OX=9913 GN=AMELX PE=1 SV=2	1	hf1_10472_ebo_30_1_261219.ScanId;v=1;d1=114.114.2	controllerType=0 controllerNumber=1 scan=114	0.3676
45500:2	1	S.M[+15.995]PLPPHPG.H		M[+16]	431.219	2	861.431	861.429	0	2.8	17	Non	217.93	217.93	101.37	2.36	1703	>sp|P02817|AMELX_BOVIN Amelogenin, X isoform OS=Bos taurus OX=9913 GN=AMELX PE=1 SV=2	1	hf1_10472_ebo_30_1_261219.ScanId;v=1;d1=32932.32932.2	controllerType=0 controllerNumber=1 scan=32932	66.0765
50455:2	1	S.M[+15.995]PLPPHPG.H		M[+16]	431.22	2	861.433	861.429	0	4.7	17	Non	218.14	218.14	63.98	2.79	1703	>sp|P02817|AMELX_BOVIN Amelogenin, X isoform OS=Bos taurus OX=9913 GN=AMELX PE=1 SV=2	1	hf1_10472_ebo_30_1_261219.ScanId;v=1;d1=37060.37060.2	controllerType=0 controllerNumber=1 scan=37060	76.7332
50692:2	1	S.M[+15.995]PLPPHPG.H		M[+16]	431.22	2	861.433	861.429	0	5.2	17	Non	225.74	225.74	109.95	2.79	1703	>sp|P02817|AMELX_BOVIN Amelogenin, X isoform OS=Bos taurus OX=9913 GN=AMELX PE=1 SV=2	1	hf1_10472_ebo_30_1_261219.ScanId;v=1;d1=37335.37335.2	controllerType=0 controllerNumber=1 scan=37335	77.7626
50624:2	1	S.M[+15.995]PLPPHPG.H		M[+16]	431.22	2	861.433	861.429	0	4.9	17	Non	226.05	226.05	26.53	2.79	1703	>sp|P02817|AMELX_BOVIN Amelogenin, X isoform OS=Bos taurus OX=9913 GN=AMELX PE=1 SV=2	1	hf1_10472_ebo_30_1_261219.ScanId;v=1;d1=37250.37250.2	controllerType=0 controllerNumber=1 scan=37250	77.4197
50398:2	1	S.M[+15.995]PLPPHPG.H		M[+16]	431.22	2	861.432	861.429	0	4	17	Non	254.73	254.73	66.79	3.42	1703	>sp|P02817|AMELX_BOVIN Amelogenin, X isoform OS=Bos taurus OX=9913 GN=AMELX PE=1 SV=2	1	hf1_10472_ebo_30_1_261219.ScanId;v=1;d1=36978.36978.2	controllerType=0 controllerNumber=1 scan=36978	76.3912
48477:2	1	S.M[+15.995]PLPPHPG.H		M[+16]	431.22	2	861.433	861.429	0	4.8	17	Non	283.08	283.08	71.41	4.33	1703	>sp|P02817|AMELX_BOVIN Amelogenin, X isoform OS=Bos taurus OX=9913 GN=AMELX PE=1 SV=2	1	hf1_10472_ebo_30_1_261219.ScanId;v=1;d1=35163.35163.2	controllerType=0 controllerNumber=1 scan=35163	70.8363
45376:2	1	S.M[+15.995]PLPPHPG.H		M[+16]	431.22	2	861.433	861.429	0	5.3	17	Non	290.82	290.82	69.67	4.19	1703	>sp|P02817|AMELX_BOVIN Amelogenin, X isoform OS=Bos taurus OX=9913 GN=AMELX PE=1 SV=2	1	hf1_10472_ebo_30_1_261219.ScanId;v=1;d1=32807.32807.2	controllerType=0 controllerNumber=1 scan=32807	65.7405
50539:2	1	S.M[+15.995]PLPPHPG.H		M[+16]	431.22	2	861.433	861.429	0	4.7	17	Non	295.91	295.91	110.92	4.93	1703	>sp|P02817|AMELX_BOVIN Amelogenin, X isoform OS=Bos taurus OX=9913 GN=AMELX PE=1 SV=2	1	hf1_10472_ebo_30_1_261219.ScanId;v=1;d1=37153.37153.2	controllerType=0 controllerNumber=1 scan=37153	77.0714
49547:2	1	S.M[+15.995]PLPPHPG.H		M[+16]	431.22	2	861.433	861.429	0	5.3	17	Non	312.92	312.92	85.53	4.93	1703	>sp|P02817|AMELX_BOVIN Amelogenin, X isoform OS=Bos taurus OX=9913 GN=AMELX PE=1 SV=2	1	hf1_10472_ebo_30_1_261219.ScanId;v=1;d1=35956.35956.2	controllerType=0 controllerNumber=1 scan=35956	72.5387
48272:2	1	S.M[+15.995]PLPPHPG.H		M[+16]	431.22	2	861.433	861.429	0	5.3	17	Non	313.59	313.59	72.35	4.93	1703	>sp|P02817|AMELX_BOVIN Amelogenin, X isoform OS=Bos taurus OX=9913 GN=AMELX PE=1 SV=2	1	hf1_10472_ebo_30_1_261219.ScanId;v=1;d1=35004.35004.2	controllerType=0 controllerNumber=1 scan=35004	70.4963
49958:2	1	S.M[+15.995]PLPPHPG.H		M[+16]	431.221	2	861.434	861.429	0	6.2	17	Non	314.73	304.5	67.32	4.17	1703	>sp|P02817|AMELX_BOVIN Amelogenin, X isoform OS=Bos taurus OX=9913 GN=AMELX PE=1 SV=2	1	hf1_10472_ebo_30_1_261219.ScanId;v=1;d1=36263.36263.2	controllerType=0 controllerNumber=1 scan=36263	73.2299
45709:2	1	S.M[+15.995]PLPPHPG.H		M[+16]	431.22	2	861.433	861.429	0	5.3	17	Non	322.94	322.94	78.24	4.39	1703	>sp|P02817|AMELX_BOVIN Amelogenin, X isoform OS=Bos taurus OX=9913 GN=AMELX PE=1 SV=2	1	hf1_10472_ebo_30_1_261219.ScanId;v=1;d1=33100.33100.2	controllerType=0 controllerNumber=1 scan=33100	66.4453
49757:2	1	S.M[+15.995]PLPPHPG.H		M[+16]	431.221	2	861.434	861.429	0	5.8	17	Non	339.04	339.04	83.11	4.39	1703	>sp|P02817|AMELX_BOVIN Amelogenin, X isoform OS=Bos taurus OX=9913 GN=AMELX PE=1 SV=2	1	hf1_10472_ebo_30_1_261219.ScanId;v=1;d1=36111.36111.2	controllerType=0 controllerNumber=1 scan=36111	72.8896
48891:2	1	S.M[+15.995]PLPPHPG.H		M[+16]	431.22	2	861.433	861.429	0	5.3	17	Non	339.97	327.28	84.44	4.49	1703	>sp|P02817|AMELX_BOVIN Amelogenin, X isoform OS=Bos taurus OX=9913 GN=AMELX PE=1 SV=2	1	hf1_10472_ebo_30_1_261219.ScanId;v=1;d1=35474.35474.2	controllerType=0 controllerNumber=1 scan=35474	71.5209
48040:2	1	S.M[+15.995]PLPPHPG.H		M[+16]	431.22	2	861.433	861.429	0	5.4	17	Non	340.68	340.68	58.53	5.1	1703	>sp|P02817|AMELX_BOVIN Amelogenin, X isoform OS=Bos taurus OX=9913 GN=AMELX PE=1 SV=2	1	hf1_10472_ebo_30_1_261219.ScanId;v=1;d1=34833.34833.2	controllerType=0 controllerNumber=1 scan=34833	70.1407
47124:2	1	S.M[+15.995]PLPPHPG.H		M[+16]	431.22	2	861.433	861.429	0	5.2	17	Non	341.32	341.32	80.64	4.39	1703	>sp|P02817|AMELX_BOVIN Amelogenin, X isoform OS=Bos taurus OX=9913 GN=AMELX PE=1 SV=2	1	hf1_10472_ebo_30_1_261219.ScanId;v=1;d1=34166.34166.2	controllerType=0 controllerNumber=1 scan=34166	68.7616
49353:2	1	S.M[+15.995]PLPPHPG.H		M[+16]	431.221	2	861.434	861.429	0	5.8	17	Non	343.51	343.51	74.64	4.39	1703	>sp|P02817|AMELX_BOVIN Amelogenin, X isoform OS=Bos taurus OX=9913 GN=AMELX PE=1 SV=2	1	hf1_10472_ebo_30_1_261219.ScanId;v=1;d1=35806.35806.2	controllerType=0 controllerNumber=1 scan=35806	72.1994
46500:2	1	S.M[+15.995]PLPPHPG.H		M[+16]	431.221	2	861.434	861.429	0	6.7	17	Non	344.45	334.01	76.87	4.33	1703	>sp|P02817|AMELX_BOVIN Amelogenin, X isoform OS=Bos taurus OX=9913 GN=AMELX PE=1 SV=2	1	hf1_10472_ebo_30_1_261219.ScanId;v=1;d1=33707.33707.2	controllerType=0 controllerNumber=1 scan=33707	67.7281
46903:2	1	S.M[+15.995]PLPPHPG.H		M[+16]	431.22	2	861.433	861.429	0	5.5	17	Non	348.67	348.67	85.44	5.1	1703	>sp|P02817|AMELX_BOVIN Amelogenin, X isoform OS=Bos taurus OX=9913 GN=AMELX PE=1 SV=2	1	hf1_10472_ebo_30_1_261219.ScanId;v=1;d1=34006.34006.2	controllerType=0 controllerNumber=1 scan=34006	68.4168
10450:2	1	S.M[+15.995]PLPPHPG.H		M[+16]	431.22	2	861.433	861.429	0	5	17	Non	357.45	300.29	86.24	4.28	1703	>sp|P02817|AMELX_BOVIN Amelogenin, X isoform OS=Bos taurus OX=9913 GN=AMELX PE=1 SV=2	1	hf1_10472_ebo_30_1_261219.ScanId;v=1;d1=9309.9309.2	controllerType=0 controllerNumber=1 scan=9309	24.3625
48661:2	1	S.M[+15.995]PLPPHPG.H		M[+16]	431.22	2	861.433	861.429	0	4.7	17	Non	359.58	359.58	82.11	5.1	1703	>sp|P02817|AMELX_BOVIN Amelogenin, X isoform OS=Bos taurus OX=9913 GN=AMELX PE=1 SV=2	1	hf1_10472_ebo_30_1_261219.ScanId;v=1;d1=35307.35307.2	controllerType=0 controllerNumber=1 scan=35307	71.1732
47803:2	1	S.M[+15.995]PLPPHPG.H		M[+16]	431.22	2	861.433	861.429	0	5	17	Non	374.39	358.54	82.02	5.09	1703	>sp|P02817|AMELX_BOVIN Amelogenin, X isoform OS=Bos taurus OX=9913 GN=AMELX PE=1 SV=2	1	hf1_10472_ebo_30_1_261219.ScanId;v=1;d1=34662.34662.2	controllerType=0 controllerNumber=1 scan=34662	69.7952
46694:2	1	S.M[+15.995]PLPPHPG.H		M[+16]	431.221	2	861.434	861.429	0	6.4	17	Non	375.14	338.07	97.49	4.43	1703	>sp|P02817|AMELX_BOVIN Amelogenin, X isoform OS=Bos taurus OX=9913 GN=AMELX PE=1 SV=2	1	hf1_10472_ebo_30_1_261219.ScanId;v=1;d1=33851.33851.2	controllerType=0 controllerNumber=1 scan=33851	68.0734
47354:2	1	S.M[+15.995]PLPPHPG.H		M[+16]	431.22	2	861.433	861.429	0	5.2	17	Non	376.32	376.32	95.1	6.03	1703	>sp|P02817|AMELX_BOVIN Amelogenin, X isoform OS=Bos taurus OX=9913 GN=AMELX PE=1 SV=2	1	hf1_10472_ebo_30_1_261219.ScanId;v=1;d1=34327.34327.2	controllerType=0 controllerNumber=1 scan=34327	69.1031
47578:2	1	S.M[+15.995]PLPPHPG.H		M[+16]	431.22	2	861.433	861.429	0	5.1	17	Non	379.8	346.75	87.89	4.39	1703	>sp|P02817|AMELX_BOVIN Amelogenin, X isoform OS=Bos taurus OX=9913 GN=AMELX PE=1 SV=2	1	hf1_10472_ebo_30_1_261219.ScanId;v=1;d1=34487.34487.2	controllerType=0 controllerNumber=1 scan=34487	69.4428
10733:2	1	S.M[+15.995]PLPPHPG.H		M[+16]	431.221	2	861.434	861.429	0	6.4	17	Non	387.71	335.17	99.74	4.29	1703	>sp|P02817|AMELX_BOVIN Amelogenin, X isoform OS=Bos taurus OX=9913 GN=AMELX PE=1 SV=2	1	hf1_10472_ebo_30_1_261219.ScanId;v=1;d1=9510.9510.2	controllerType=0 controllerNumber=1 scan=9510	24.7042
10153:2	1	S.M[+15.995]PLPPHPG.H		M[+16]	431.221	2	861.434	861.429	0	6	17	Non	389.27	289.01	82.18	4.28	1703	>sp|P02817|AMELX_BOVIN Amelogenin, X isoform OS=Bos taurus OX=9913 GN=AMELX PE=1 SV=2	1	hf1_10472_ebo_30_1_261219.ScanId;v=1;d1=9099.9099.2	controllerType=0 controllerNumber=1 scan=9099	24.0181
49120:2	1	S.M[+15.995]PLPPHPG.H		M[+16]	431.221	2	861.434	861.429	0	5.7	17	Non	395.73	395.73	79.22	5.33	1703	>sp|P02817|AMELX_BOVIN Amelogenin, X isoform OS=Bos taurus OX=9913 GN=AMELX PE=1 SV=2	1	hf1_10472_ebo_30_1_261219.ScanId;v=1;d1=35639.35639.2	controllerType=0 controllerNumber=1 scan=35639	71.8596
09857:2	1	S.M[+15.995]PLPPHPG.H		M[+16]	431.221	2	861.434	861.429	0	6	17	Non	398.49	374.22	113.99	5.28	1703	>sp|P02817|AMELX_BOVIN Amelogenin, X isoform OS=Bos taurus OX=9913 GN=AMELX PE=1 SV=2	1	hf1_10472_ebo_30_1_261219.ScanId;v=1;d1=8892.8892.2	controllerType=0 controllerNumber=1 scan=8892	23.664
46021:2	1	S.M[+15.995]PLPPHPG.H		M[+16]	431.22	2	861.433	861.429	0	5.2	17	Non	401.1	358.77	82.73	4.44	1703	>sp|P02817|AMELX_BOVIN Amelogenin, X isoform OS=Bos taurus OX=9913 GN=AMELX PE=1 SV=2	1	hf1_10472_ebo_30_1_261219.ScanId;v=1;d1=33332.33332.2	controllerType=0 controllerNumber=1 scan=33332	66.9219
07758:2	1	S.M[+15.995]PLPPHPG.H		M[+16]	431.221	2	861.435	861.429	0	7	17	Non	429.22	368.99	96.07	5.41	1703	>sp|P02817|AMELX_BOVIN Amelogenin, X isoform OS=Bos taurus OX=9913 GN=AMELX PE=1 SV=2	1	hf1_10472_ebo_30_1_261219.ScanId;v=1;d1=7468.7468.2	controllerType=0 controllerNumber=1 scan=7468	21.2312
08344:2	1	S.M[+15.995]PLPPHPG.H		M[+16]	431.221	2	861.435	861.429	0	7.3	17	Non	431.63	399.58	101.54	6.01	1703	>sp|P02817|AMELX_BOVIN Amelogenin, X isoform OS=Bos taurus OX=9913 GN=AMELX PE=1 SV=2	1	hf1_10472_ebo_30_1_261219.ScanId;v=1;d1=7878.7878.2	controllerType=0 controllerNumber=1 scan=7878	21.9256
09244:2	1	S.M[+15.995]PLPPHPG.H		M[+16]	431.221	2	861.436	861.429	0	8	17	Non	433.88	388.84	98.98	5.41	1703	>sp|P02817|AMELX_BOVIN Amelogenin, X isoform OS=Bos taurus OX=9913 GN=AMELX PE=1 SV=2	1	hf1_10472_ebo_30_1_261219.ScanId;v=1;d1=8484.8484.2	controllerType=0 controllerNumber=1 scan=8484	22.9585
07455:2	1	S.M[+15.995]PLPPHPG.H		M[+16]	431.221	2	861.434	861.429	0	6.2	17	Non	434.26	378.38	101.46	5.41	1703	>sp|P02817|AMELX_BOVIN Amelogenin, X isoform OS=Bos taurus OX=9913 GN=AMELX PE=1 SV=2	1	hf1_10472_ebo_30_1_261219.ScanId;v=1;d1=7259.7259.2	controllerType=0 controllerNumber=1 scan=7259	20.8794
09563:2	1	S.M[+15.995]PLPPHPG.H		M[+16]	431.221	2	861.435	861.429	0	6.9	17	Non	437.8	335.36	101.79	4.33	1703	>sp|P02817|AMELX_BOVIN Amelogenin, X isoform OS=Bos taurus OX=9913 GN=AMELX PE=1 SV=2	1	hf1_10472_ebo_30_1_261219.ScanId;v=1;d1=8692.8692.2	controllerType=0 controllerNumber=1 scan=8692	23.3164
08647:2	1	S.M[+15.995]PLPPHPG.H		M[+16]	431.221	2	861.435	861.429	0	7.3	17	Non	442.64	389.4	98.38	5.94	1703	>sp|P02817|AMELX_BOVIN Amelogenin, X isoform OS=Bos taurus OX=9913 GN=AMELX PE=1 SV=2	1	hf1_10472_ebo_30_1_261219.ScanId;v=1;d1=8085.8085.2	controllerType=0 controllerNumber=1 scan=8085	22.2739
07160:2	1	S.M[+15.995]PLPPHPG.H		M[+16]	431.221	2	861.435	861.429	0	7.7	17	Non	448.43	394.81	100.64	5.34	1703	>sp|P02817|AMELX_BOVIN Amelogenin, X isoform OS=Bos taurus OX=9913 GN=AMELX PE=1 SV=2	1	hf1_10472_ebo_30_1_261219.ScanId;v=1;d1=7055.7055.2	controllerType=0 controllerNumber=1 scan=7055	20.5397
08943:2	1	S.M[+15.995]PLPPHPG.H		M[+16]	431.221	2	861.436	861.429	0	8.1	17	Non	450.03	383.52	100.67	5.24	1703	>sp|P02817|AMELX_BOVIN Amelogenin, X isoform OS=Bos taurus OX=9913 GN=AMELX PE=1 SV=2	1	hf1_10472_ebo_30_1_261219.ScanId;v=1;d1=8283.8283.2	controllerType=0 controllerNumber=1 scan=8283	22.6141
08054:2	1	S.M[+15.995]PLPPHPG.H		M[+16]	431.221	2	861.435	861.429	0	6.8	17	Non	454.54	377.34	95.45	5.34	1703	>sp|P02817|AMELX_BOVIN Amelogenin, X isoform OS=Bos taurus OX=9913 GN=AMELX PE=1 SV=2	1	hf1_10472_ebo_30_1_261219.ScanId;v=1;d1=7677.7677.2	controllerType=0 controllerNumber=1 scan=7677	21.5847
06634:2	1	S.M[+15.995]PLPPH[+15.995]PG.H		H[+16], M[+16]	439.219	2	877.43	877.424	0	7.2	17	Non	201.72	67.67	2.66	0.83	1703	>sp|P02817|AMELX_BOVIN Amelogenin, X isoform OS=Bos taurus OX=9913 GN=AMELX PE=1 SV=2	1	hf1_10472_ebo_30_1_261219.ScanId;v=1;d1=6682.6682.2	controllerType=0 controllerNumber=1 scan=6682	19.9178
05521:2	1	S.M[+15.995]PLPPH[+15.995]PG.H		H[+16], M[+16]	439.218	2	877.429	877.424	0	5.8	17	Non	218.62	129.73	5.62	1.25	1703	>sp|P02817|AMELX_BOVIN Amelogenin, X isoform OS=Bos taurus OX=9913 GN=AMELX PE=1 SV=2	1	hf1_10472_ebo_30_1_261219.ScanId;v=1;d1=5895.5895.2	controllerType=0 controllerNumber=1 scan=5895	18.5906
05801:2	1	S.M[+15.995]PLPPHP[+15.995]G.H		M[+16], P[+16]	439.218	2	877.429	877.424	0	6.2	17	Non	233.74	102.91	31.74	0.83	1703	>sp|P02817|AMELX_BOVIN Amelogenin, X isoform OS=Bos taurus OX=9913 GN=AMELX PE=1 SV=2	1	hf1_10472_ebo_30_1_261219.ScanId;v=1;d1=6096.6096.2	controllerType=0 controllerNumber=1 scan=6096	18.9311
04466:2	1	S.M[+15.995]PLP[+15.995]PHPG.H		M[+16], P[+16]	439.218	2	877.429	877.424	0	6	17	Non	238.07	129.99	12.79	1.25	1703	>sp|P02817|AMELX_BOVIN Amelogenin, X isoform OS=Bos taurus OX=9913 GN=AMELX PE=1 SV=2	1	hf1_10472_ebo_30_1_261219.ScanId;v=1;d1=5149.5149.2	controllerType=0 controllerNumber=1 scan=5149	17.3146
05203:2	1	S.M[+15.995]PLP[+15.995]PHPG.H		M[+16], P[+16]	439.218	2	877.429	877.424	0	6.2	17	Non	263.05	195.93	11.86	3.28	1703	>sp|P02817|AMELX_BOVIN Amelogenin, X isoform OS=Bos taurus OX=9913 GN=AMELX PE=1 SV=2	1	hf1_10472_ebo_30_1_261219.ScanId;v=1;d1=5672.5672.2	controllerType=0 controllerNumber=1 scan=5672	18.2047
09943:2	1	S.MPLPPHPGH.P			491.753	2	982.499	982.493	0	5.8	17	Non	445.09	400.53	400.53	5.54	1703	>sp|P02817|AMELX_BOVIN Amelogenin, X isoform OS=Bos taurus OX=9913 GN=AMELX PE=1 SV=2	1	hf1_10472_ebo_30_1_261219.ScanId;v=1;d1=8950.8950.2	controllerType=0 controllerNumber=1 scan=8950	23.7604
10145:2	1	S.MPLPPHPGH.P			491.753	2	982.498	982.493	0	5.7	17	Non	488.91	432.75	432.75	5.84	1703	>sp|P02817|AMELX_BOVIN Amelogenin, X isoform OS=Bos taurus OX=9913 GN=AMELX PE=1 SV=2	1	hf1_10472_ebo_30_1_261219.ScanId;v=1;d1=9091.9091.2	controllerType=0 controllerNumber=1 scan=9091	24.0044
09191:2	1	S.MPLPPHPGH.P			491.754	2	982.5	982.493	0	7.8	17	Non	498.21	360.5	360.5	5.63	1703	>sp|P02817|AMELX_BOVIN Amelogenin, X isoform OS=Bos taurus OX=9913 GN=AMELX PE=1 SV=2	1	hf1_10472_ebo_30_1_261219.ScanId;v=1;d1=8445.8445.2	controllerType=0 controllerNumber=1 scan=8445	22.8899
09488:2	1	S.MPLPPHPGH.P			491.753	2	982.5	982.493	0	7	17	Non	552.71	435.15	435.15	5.88	1703	>sp|P02817|AMELX_BOVIN Amelogenin, X isoform OS=Bos taurus OX=9913 GN=AMELX PE=1 SV=2	1	hf1_10472_ebo_30_1_261219.ScanId;v=1;d1=8645.8645.2	controllerType=0 controllerNumber=1 scan=8645	23.2376
09794:2	1	S.MPLPPHPGH.P			491.753	2	982.499	982.493	0	6.5	17	Non	573.07	409.47	409.47	7.26	1703	>sp|P02817|AMELX_BOVIN Amelogenin, X isoform OS=Bos taurus OX=9913 GN=AMELX PE=1 SV=2	1	hf1_10472_ebo_30_1_261219.ScanId;v=1;d1=8850.8850.2	controllerType=0 controllerNumber=1 scan=8850	23.5911
04062:2	1	S.M[+15.995]PLPPHPGH.P		M[+16]	499.751	2	998.495	998.488	0	7.1	17	Non	402.44	320.77	81.2	4.61	1703	>sp|P02817|AMELX_BOVIN Amelogenin, X isoform OS=Bos taurus OX=9913 GN=AMELX PE=1 SV=2	1	hf1_10472_ebo_30_1_261219.ScanId;v=1;d1=4862.4862.2	controllerType=0 controllerNumber=1 scan=4862	16.8328
05498:2	1	S.M[+15.995]PLPPHPGH.P		M[+16]	499.75	2	998.493	998.488	0	5.1	17	Non	457.77	418.5	93.86	5.58	1703	>sp|P02817|AMELX_BOVIN Amelogenin, X isoform OS=Bos taurus OX=9913 GN=AMELX PE=1 SV=2	1	hf1_10472_ebo_30_1_261219.ScanId;v=1;d1=5879.5879.2	controllerType=0 controllerNumber=1 scan=5879	18.5612
06126:2	1	S.M[+15.995]PLPPHPGH.P		M[+16]	499.751	2	998.494	998.488	0	6.5	17	Non	467.26	418.64	71.3	5.51	1703	>sp|P02817|AMELX_BOVIN Amelogenin, X isoform OS=Bos taurus OX=9913 GN=AMELX PE=1 SV=2	1	hf1_10472_ebo_30_1_261219.ScanId;v=1;d1=6330.6330.2	controllerType=0 controllerNumber=1 scan=6330	19.3265
05210:2	1	S.M[+15.995]PLPPHPGH.P		M[+16]	499.75	2	998.494	998.488	0	5.8	17	Non	495.37	442.24	104.35	6.44	1703	>sp|P02817|AMELX_BOVIN Amelogenin, X isoform OS=Bos taurus OX=9913 GN=AMELX PE=1 SV=2	1	hf1_10472_ebo_30_1_261219.ScanId;v=1;d1=5677.5677.2	controllerType=0 controllerNumber=1 scan=5677	18.2149
05787:2	1	S.M[+15.995]PLPPHPGH.P		M[+16]	499.75	2	998.493	998.488	0	5.8	17	Non	504	463.11	84.99	5.74	1703	>sp|P02817|AMELX_BOVIN Amelogenin, X isoform OS=Bos taurus OX=9913 GN=AMELX PE=1 SV=2	1	hf1_10472_ebo_30_1_261219.ScanId;v=1;d1=6085.6085.2	controllerType=0 controllerNumber=1 scan=6085	18.9119
04926:2	1	S.M[+15.995]PLPPHPGH.P		M[+16]	499.75	2	998.492	998.488	0	4.8	17	Non	565.64	493.28	118.4	7.33	1703	>sp|P02817|AMELX_BOVIN Amelogenin, X isoform OS=Bos taurus OX=9913 GN=AMELX PE=1 SV=2	1	hf1_10472_ebo_30_1_261219.ScanId;v=1;d1=5476.5476.2	controllerType=0 controllerNumber=1 scan=5476	17.8776
04368:2	1	S.M[+15.995]PLPPHPGH.P		M[+16]	499.75	2	998.494	998.488	0	5.9	17	Non	567.97	471.68	113.7	7.33	1703	>sp|P02817|AMELX_BOVIN Amelogenin, X isoform OS=Bos taurus OX=9913 GN=AMELX PE=1 SV=2	1	hf1_10472_ebo_30_1_261219.ScanId;v=1;d1=5074.5074.2	controllerType=0 controllerNumber=1 scan=5074	17.184
04649:2	1	S.M[+15.995]PLPPHPGH.P		M[+16]	499.75	2	998.494	998.488	0	6	17	Non	584.09	525.74	135.96	7.33	1703	>sp|P02817|AMELX_BOVIN Amelogenin, X isoform OS=Bos taurus OX=9913 GN=AMELX PE=1 SV=2	1	hf1_10472_ebo_30_1_261219.ScanId;v=1;d1=5280.5280.2	controllerType=0 controllerNumber=1 scan=5280	17.539
10509:2	1	S.MPLPPHPGHP.G			540.279	2	1079.55	1079.55	0	5.8	17	Non	449.24	282.62	282.62	5.27	1703	>sp|P02817|AMELX_BOVIN Amelogenin, X isoform OS=Bos taurus OX=9913 GN=AMELX PE=1 SV=2	1	hf1_10472_ebo_30_1_261219.ScanId;v=1;d1=9355.9355.2	controllerType=0 controllerNumber=1 scan=9355	24.4443
11384:2	1	S.MPLPPHPGHP.G			540.279	2	1079.55	1079.55	0	5.3	17	Non	517.64	341.12	341.12	5.39	1703	>sp|P02817|AMELX_BOVIN Amelogenin, X isoform OS=Bos taurus OX=9913 GN=AMELX PE=1 SV=2	1	hf1_10472_ebo_30_1_261219.ScanId;v=1;d1=9961.9961.2	controllerType=0 controllerNumber=1 scan=9961	25.485
11094:2	1	S.MPLPPHPGHP.G			540.28	2	1079.55	1079.55	0	6.6	17	Non	567.04	367.32	367.32	7.15	1703	>sp|P02817|AMELX_BOVIN Amelogenin, X isoform OS=Bos taurus OX=9913 GN=AMELX PE=1 SV=2	1	hf1_10472_ebo_30_1_261219.ScanId;v=1;d1=9762.9762.2	controllerType=0 controllerNumber=1 scan=9762	25.1391
10816:2	1	S.MPLPPHPGHP.G			540.28	2	1079.55	1079.55	0	6.3	17	Non	580.53	377.33	377.33	7.25	1703	>sp|P02817|AMELX_BOVIN Amelogenin, X isoform OS=Bos taurus OX=9913 GN=AMELX PE=1 SV=2	1	hf1_10472_ebo_30_1_261219.ScanId;v=1;d1=9563.9563.2	controllerType=0 controllerNumber=1 scan=9563	24.7922
50187:2	1	S.M[+15.995]PLPPHPGHP.G		M[+16]	548.278	2	1095.55	1095.54	0	7.3	17	Non	354.53	244.14	48.15	4.95	1703	>sp|P02817|AMELX_BOVIN Amelogenin, X isoform OS=Bos taurus OX=9913 GN=AMELX PE=1 SV=2	1	hf1_10472_ebo_30_1_261219.ScanId;v=1;d1=36429.36429.2	controllerType=0 controllerNumber=1 scan=36429	73.5552
07202:2	1	S.M[+15.995]PLPPHPGHP.G		M[+16]	548.277	2	1095.55	1095.54	0	6.1	17	Non	554.6	355.79	74.81	6.21	1703	>sp|P02817|AMELX_BOVIN Amelogenin, X isoform OS=Bos taurus OX=9913 GN=AMELX PE=1 SV=2	1	hf1_10472_ebo_30_1_261219.ScanId;v=1;d1=7088.7088.2	controllerType=0 controllerNumber=1 scan=7088	20.595
06224:2	1	S.M[+15.995]PLPPHPGHP.G		M[+16]	548.278	2	1095.55	1095.54	0	7.1	17	Non	568.03	404.5	87.2	7.85	1703	>sp|P02817|AMELX_BOVIN Amelogenin, X isoform OS=Bos taurus OX=9913 GN=AMELX PE=1 SV=2	1	hf1_10472_ebo_30_1_261219.ScanId;v=1;d1=6399.6399.2	controllerType=0 controllerNumber=1 scan=6399	19.4391
06924:2	1	S.M[+15.995]PLPPHPGHP.G		M[+16]	548.277	2	1095.55	1095.54	0	6.2	17	Non	602.5	392.55	86.79	8.92	1703	>sp|P02817|AMELX_BOVIN Amelogenin, X isoform OS=Bos taurus OX=9913 GN=AMELX PE=1 SV=2	1	hf1_10472_ebo_30_1_261219.ScanId;v=1;d1=6884.6884.2	controllerType=0 controllerNumber=1 scan=6884	20.2465
06527:2	1	S.M[+15.995]PLPPHPGHP.G		M[+16]	548.277	2	1095.55	1095.54	0	6.2	17	Non	641	422.59	90.44	8.92	1703	>sp|P02817|AMELX_BOVIN Amelogenin, X isoform OS=Bos taurus OX=9913 GN=AMELX PE=1 SV=2	1	hf1_10472_ebo_30_1_261219.ScanId;v=1;d1=6604.6604.2	controllerType=0 controllerNumber=1 scan=6604	19.7847
05443:2	1	S.M[+15.995]PLPPHPGH[+15.995]P.G		H[+16], M[+16]	556.275	2	1111.54	1111.54	0	5.9	17	Non	188.44	188.44	4.61	1.73	1703	>sp|P02817|AMELX_BOVIN Amelogenin, X isoform OS=Bos taurus OX=9913 GN=AMELX PE=1 SV=2	1	hf1_10472_ebo_30_1_261219.ScanId;v=1;d1=5841.5841.2	controllerType=0 controllerNumber=1 scan=5841	18.4936
05608:2	1	S.M[+15.995]PLPPHPGHP[+15.995].G		M[+16], P[+16]	556.274	2	1111.54	1111.54	0	5.3	17	Non	238.88	238.88	35.89	2.72	1703	>sp|P02817|AMELX_BOVIN Amelogenin, X isoform OS=Bos taurus OX=9913 GN=AMELX PE=1 SV=2	1	hf1_10472_ebo_30_1_261219.ScanId;v=1;d1=5951.5951.3	controllerType=0 controllerNumber=1 scan=5951	18.6839
05732:2	1	S.M[+15.995]PLPPHPGHP[+15.995].G		M[+16], P[+16]	556.274	2	1111.54	1111.54	0	5.6	17	Non	264.68	264.68	2.93	4.02	1703	>sp|P02817|AMELX_BOVIN Amelogenin, X isoform OS=Bos taurus OX=9913 GN=AMELX PE=1 SV=2	1	hf1_10472_ebo_30_1_261219.ScanId;v=1;d1=6043.6043.3	controllerType=0 controllerNumber=1 scan=6043	18.8373
09684:2	1	S.MPLPPHPGHPG.Y			568.79	2	1136.57	1136.57	0	5.8	17	Non	169.15	52.94	52.94	2.29	1703	>sp|P02817|AMELX_BOVIN Amelogenin, X isoform OS=Bos taurus OX=9913 GN=AMELX PE=1 SV=2	1	hf1_10472_ebo_30_1_261219.ScanId;v=1;d1=8770.8770.2	controllerType=0 controllerNumber=1 scan=8770	23.4485
00151:3	1	S.MPLPPHPGHPG.Y			379.529	3	1136.57	1136.57	0	4.9	17	Non	191.16	191.16	191.16	2.87	1703	>sp|P02817|AMELX_BOVIN Amelogenin, X isoform OS=Bos taurus OX=9913 GN=AMELX PE=1 SV=2	1	hf1_10472_ebo_30_1_261219.ScanId;v=1;d1=167.167.3	controllerType=0 controllerNumber=1 scan=167	0.5478
11023:3	1	S.MPLPPHPGHPG.Y			379.529	3	1136.57	1136.57	0	6.2	17	Non	296.61	225.88	225.88	4.45	1703	>sp|P02817|AMELX_BOVIN Amelogenin, X isoform OS=Bos taurus OX=9913 GN=AMELX PE=1 SV=2	1	hf1_10472_ebo_30_1_261219.ScanId;v=1;d1=9715.9715.3	controllerType=0 controllerNumber=1 scan=9715	25.0589
09266:3	1	S.MPLPPHPGHPG.Y			379.53	3	1136.57	1136.57	0	7	17	Non	454.37	330.48	330.48	4.89	1703	>sp|P02817|AMELX_BOVIN Amelogenin, X isoform OS=Bos taurus OX=9913 GN=AMELX PE=1 SV=2	1	hf1_10472_ebo_30_1_261219.ScanId;v=1;d1=8500.8500.3	controllerType=0 controllerNumber=1 scan=8500	22.9844
10749:3	1	S.MPLPPHPGHPG.Y			379.529	3	1136.57	1136.57	0	5.9	17	Non	458.57	367.48	367.48	5.89	1703	>sp|P02817|AMELX_BOVIN Amelogenin, X isoform OS=Bos taurus OX=9913 GN=AMELX PE=1 SV=2	1	hf1_10472_ebo_30_1_261219.ScanId;v=1;d1=9520.9520.3	controllerType=0 controllerNumber=1 scan=9520	24.7197
10162:3	1	S.MPLPPHPGHPG.Y			379.529	3	1136.57	1136.57	0	6.1	17	Non	483.88	372.55	372.55	6.76	1703	>sp|P02817|AMELX_BOVIN Amelogenin, X isoform OS=Bos taurus OX=9913 GN=AMELX PE=1 SV=2	1	hf1_10472_ebo_30_1_261219.ScanId;v=1;d1=9106.9106.3	controllerType=0 controllerNumber=1 scan=9106	24.0305
09574:3	1	S.MPLPPHPGHPG.Y			379.53	3	1136.57	1136.57	0	6.5	17	Non	506.23	421.7	421.7	6.69	1703	>sp|P02817|AMELX_BOVIN Amelogenin, X isoform OS=Bos taurus OX=9913 GN=AMELX PE=1 SV=2	1	hf1_10472_ebo_30_1_261219.ScanId;v=1;d1=8699.8699.3	controllerType=0 controllerNumber=1 scan=8699	23.3296
09875:3	1	S.MPLPPHPGHPG.Y			379.529	3	1136.57	1136.57	0	6.2	17	Non	510.06	399.05	399.05	6.76	1703	>sp|P02817|AMELX_BOVIN Amelogenin, X isoform OS=Bos taurus OX=9913 GN=AMELX PE=1 SV=2	1	hf1_10472_ebo_30_1_261219.ScanId;v=1;d1=8903.8903.3	controllerType=0 controllerNumber=1 scan=8903	23.682
10453:3	1	S.MPLPPHPGHPG.Y			379.529	3	1136.57	1136.57	0	4.8	17	Non	516.06	480.8	480.8	6.76	1703	>sp|P02817|AMELX_BOVIN Amelogenin, X isoform OS=Bos taurus OX=9913 GN=AMELX PE=1 SV=2	1	hf1_10472_ebo_30_1_261219.ScanId;v=1;d1=9312.9312.3	controllerType=0 controllerNumber=1 scan=9312	24.3698
09516:2	1	S.MPLPPHPGHPG.Y			568.791	2	1136.57	1136.57	0	7	17	Non	557.19	390.77	390.77	7.08	1703	>sp|P02817|AMELX_BOVIN Amelogenin, X isoform OS=Bos taurus OX=9913 GN=AMELX PE=1 SV=2	1	hf1_10472_ebo_30_1_261219.ScanId;v=1;d1=8662.8662.2	controllerType=0 controllerNumber=1 scan=8662	23.2654
10084:2	1	S.MPLPPHPGHPG.Y			568.79	2	1136.57	1136.57	0	5.8	17	Non	651.25	494.03	494.03	9.92	1703	>sp|P02817|AMELX_BOVIN Amelogenin, X isoform OS=Bos taurus OX=9913 GN=AMELX PE=1 SV=2	1	hf1_10472_ebo_30_1_261219.ScanId;v=1;d1=9050.9050.2	controllerType=0 controllerNumber=1 scan=9050	23.9395
50568:3	1	S.MP[+15.995]LPPHPGHPG.Y		P[+16]	384.861	3	1152.57	1152.56	0	4.4	17	Non	40.3	40.3	4	1.47	1703	>sp|P02817|AMELX_BOVIN Amelogenin, X isoform OS=Bos taurus OX=9913 GN=AMELX PE=1 SV=2	1	hf1_10472_ebo_30_1_261219.ScanId;v=1;d1=37184.37184.3	controllerType=0 controllerNumber=1 scan=37184	77.1726
07912:3	1	S.M[+31.990]PLPPHPGHPG.Y		M[+32]	390.193	3	1168.57	1168.56	0	7.4	17	Non	178.84	143.64	0	1.41	1703	>sp|P02817|AMELX_BOVIN Amelogenin, X isoform OS=Bos taurus OX=9913 GN=AMELX PE=1 SV=2	1	hf1_10472_ebo_30_1_261219.ScanId;v=1;d1=7578.7578.3	controllerType=0 controllerNumber=1 scan=7578	21.4155
09330:3	1	S.MPLPPH[+15.995]PGHPG.Y		H[+16]	384.862	3	1152.57	1152.56	0	7.4	17	Non	249.6	186.52	1.36	3.78	1703	>sp|P02817|AMELX_BOVIN Amelogenin, X isoform OS=Bos taurus OX=9913 GN=AMELX PE=1 SV=2	1	hf1_10472_ebo_30_1_261219.ScanId;v=1;d1=8541.8541.3	controllerType=0 controllerNumber=1 scan=8541	23.058
06691:2	1	S.M[+31.990]PLPPHPGHPG.Y		M[+32]	584.786	2	1168.56	1168.56	0	6.6	17	Non	264.98	157.82	0	3.2	1703	>sp|P02817|AMELX_BOVIN Amelogenin, X isoform OS=Bos taurus OX=9913 GN=AMELX PE=1 SV=2	1	hf1_10472_ebo_30_1_261219.ScanId;v=1;d1=6721.6721.2	controllerType=0 controllerNumber=1 scan=6721	19.9819
04713:2	1	S.M[+15.995]PLPPHPGHPG.Y		M[+16]	576.788	2	1152.57	1152.56	0	5.5	17	Non	272.56	180.06	55.72	4.12	1703	>sp|P02817|AMELX_BOVIN Amelogenin, X isoform OS=Bos taurus OX=9913 GN=AMELX PE=1 SV=2	1	hf1_10472_ebo_30_1_261219.ScanId;v=1;d1=5326.5326.2	controllerType=0 controllerNumber=1 scan=5326	17.6179
09303:3	1	S.M[+15.995]PLPPHPGHPG.Y		M[+16]	384.861	3	1152.57	1152.56	0	6.6	17	Non	278.92	214.66	20.37	4.27	1703	>sp|P02817|AMELX_BOVIN Amelogenin, X isoform OS=Bos taurus OX=9913 GN=AMELX PE=1 SV=2	1	hf1_10472_ebo_30_1_261219.ScanId;v=1;d1=8524.8524.4	controllerType=0 controllerNumber=1 scan=8524	23.0271
06384:3	1	S.M[+31.990]PLPPHPGHPG.Y		M[+32]	390.192	3	1168.56	1168.56	0	4.5	17	Non	286.96	286.96	13.63	4.6	1703	>sp|P02817|AMELX_BOVIN Amelogenin, X isoform OS=Bos taurus OX=9913 GN=AMELX PE=1 SV=2	1	hf1_10472_ebo_30_1_261219.ScanId;v=1;d1=6505.6505.2	controllerType=0 controllerNumber=1 scan=6505	19.6152
08994:3	1	S.M[+15.995]PLPPHPGHPG.Y		M[+16]	384.861	3	1152.57	1152.56	0	6.9	17	Non	292.93	212.57	11.25	4.39	1703	>sp|P02817|AMELX_BOVIN Amelogenin, X isoform OS=Bos taurus OX=9913 GN=AMELX PE=1 SV=2	1	hf1_10472_ebo_30_1_261219.ScanId;v=1;d1=8315.8315.3	controllerType=0 controllerNumber=1 scan=8315	22.6684
10074:3	1	S.M[+15.995]PLPPHPGHPG.Y		M[+16]	384.861	3	1152.57	1152.56	0	5.5	17	Non	293.62	219.1	23.46	4.44	1703	>sp|P02817|AMELX_BOVIN Amelogenin, X isoform OS=Bos taurus OX=9913 GN=AMELX PE=1 SV=2	1	hf1_10472_ebo_30_1_261219.ScanId;v=1;d1=9042.9042.3	controllerType=0 controllerNumber=1 scan=9042	23.9231
09758:3	1	S.M[+15.995]PLPPHPGHPG.Y		M[+16]	384.861	3	1152.57	1152.56	0	5.6	17	Non	305	228.05	16.58	4.27	1703	>sp|P02817|AMELX_BOVIN Amelogenin, X isoform OS=Bos taurus OX=9913 GN=AMELX PE=1 SV=2	1	hf1_10472_ebo_30_1_261219.ScanId;v=1;d1=8825.8825.3	controllerType=0 controllerNumber=1 scan=8825	23.5433
08599:3	1	S.MPLPPHPGH[+15.995]PG.Y		H[+16]	384.861	3	1152.57	1152.56	0	6.6	17	Non	309.94	212.95	10	4.39	1703	>sp|P02817|AMELX_BOVIN Amelogenin, X isoform OS=Bos taurus OX=9913 GN=AMELX PE=1 SV=2	1	hf1_10472_ebo_30_1_261219.ScanId;v=1;d1=8049.8049.3	controllerType=0 controllerNumber=1 scan=8049	22.2097
08273:3	1	S.MPLP[+15.995]PHPGHPG.Y		P[+16]	384.861	3	1152.57	1152.56	0	6.1	17	Non	337.98	254.94	19.9	4.75	1703	>sp|P02817|AMELX_BOVIN Amelogenin, X isoform OS=Bos taurus OX=9913 GN=AMELX PE=1 SV=2	1	hf1_10472_ebo_30_1_261219.ScanId;v=1;d1=7835.7835.3	controllerType=0 controllerNumber=1 scan=7835	21.8508
06981:3	1	S.M[+31.990]PLPPHPGHPG.Y		M[+32]	390.193	3	1168.56	1168.56	0	6.7	17	Non	358.68	300.37	12.66	4.85	1703	>sp|P02817|AMELX_BOVIN Amelogenin, X isoform OS=Bos taurus OX=9913 GN=AMELX PE=1 SV=2	1	hf1_10472_ebo_30_1_261219.ScanId;v=1;d1=6923.6923.3	controllerType=0 controllerNumber=1 scan=6923	20.314
07477:3	1	S.M[+31.990]PLPPHPGHPG.Y		M[+32]	390.192	3	1168.56	1168.56	0	5.2	17	Non	373.21	300.19	12.26	5.02	1703	>sp|P02817|AMELX_BOVIN Amelogenin, X isoform OS=Bos taurus OX=9913 GN=AMELX PE=1 SV=2	1	hf1_10472_ebo_30_1_261219.ScanId;v=1;d1=7276.7276.3	controllerType=0 controllerNumber=1 scan=7276	20.9068
04741:3	1	S.M[+15.995]PLPPHPGHPG.Y		M[+16]	384.861	3	1152.57	1152.56	0	5.6	17	Non	377.12	334.43	33.22	5.69	1703	>sp|P02817|AMELX_BOVIN Amelogenin, X isoform OS=Bos taurus OX=9913 GN=AMELX PE=1 SV=2	1	hf1_10472_ebo_30_1_261219.ScanId;v=1;d1=5347.5347.3	controllerType=0 controllerNumber=1 scan=5347	17.6558
07978:3	1	S.M[+15.995]PLPPHPGHPG.Y		M[+16]	384.861	3	1152.57	1152.56	0	5.8	17	Non	377.24	297.51	30.13	5.02	1703	>sp|P02817|AMELX_BOVIN Amelogenin, X isoform OS=Bos taurus OX=9913 GN=AMELX PE=1 SV=2	1	hf1_10472_ebo_30_1_261219.ScanId;v=1;d1=7623.7623.3	controllerType=0 controllerNumber=1 scan=7623	21.4922
07377:3	1	S.M[+15.995]PLPPHPGHPG.Y		M[+16]	384.861	3	1152.57	1152.56	0	5.1	17	Non	396.26	318.65	36.52	5.62	1703	>sp|P02817|AMELX_BOVIN Amelogenin, X isoform OS=Bos taurus OX=9913 GN=AMELX PE=1 SV=2	1	hf1_10472_ebo_30_1_261219.ScanId;v=1;d1=7204.7204.3	controllerType=0 controllerNumber=1 scan=7204	20.7913
06202:3	1	S.M[+31.990]PLPPHPGHPG.Y		M[+32]	390.193	3	1168.56	1168.56	0	6.9	17	Non	398.76	356.11	11.88	4.92	1703	>sp|P02817|AMELX_BOVIN Amelogenin, X isoform OS=Bos taurus OX=9913 GN=AMELX PE=1 SV=2	1	hf1_10472_ebo_30_1_261219.ScanId;v=1;d1=6383.6383.3	controllerType=0 controllerNumber=1 scan=6383	19.4136
50100:3	1	S.M[+15.995]PLPPHPGHPG.Y		M[+16]	384.861	3	1152.57	1152.56	0	6.4	17	Non	405.07	390.28	39.27	6.61	1703	>sp|P02817|AMELX_BOVIN Amelogenin, X isoform OS=Bos taurus OX=9913 GN=AMELX PE=1 SV=2	1	hf1_10472_ebo_30_1_261219.ScanId;v=1;d1=36367.36367.3	controllerType=0 controllerNumber=1 scan=36367	73.4477
07542:2	1	S.M[+15.995]PLPPHPGHPG.Y		M[+16]	576.788	2	1152.57	1152.56	0	6.3	17	Non	406.44	307.46	51.88	5.28	1703	>sp|P02817|AMELX_BOVIN Amelogenin, X isoform OS=Bos taurus OX=9913 GN=AMELX PE=1 SV=2	1	hf1_10472_ebo_30_1_261219.ScanId;v=1;d1=7320.7320.2	controllerType=0 controllerNumber=1 scan=7320	20.9823
05625:3	1	S.M[+15.995]PLPPHPGHPG.Y		M[+16]	384.862	3	1152.57	1152.56	0	7.4	17	Non	419.1	375.72	33.74	6.61	1703	>sp|P02817|AMELX_BOVIN Amelogenin, X isoform OS=Bos taurus OX=9913 GN=AMELX PE=1 SV=2	1	hf1_10472_ebo_30_1_261219.ScanId;v=1;d1=5964.5964.3	controllerType=0 controllerNumber=1 scan=5964	18.7082
05035:3	1	S.M[+15.995]PLPPHPGHPG.Y		M[+16]	384.861	3	1152.57	1152.56	0	5.9	17	Non	423.61	411.49	53.38	6.67	1703	>sp|P02817|AMELX_BOVIN Amelogenin, X isoform OS=Bos taurus OX=9913 GN=AMELX PE=1 SV=2	1	hf1_10472_ebo_30_1_261219.ScanId;v=1;d1=5556.5556.3	controllerType=0 controllerNumber=1 scan=5556	18.0116
07679:3	1	S.M[+15.995]PLPPHPGHPG.Y		M[+16]	384.861	3	1152.57	1152.56	0	5.1	17	Non	426.18	354.83	31.71	5.03	1703	>sp|P02817|AMELX_BOVIN Amelogenin, X isoform OS=Bos taurus OX=9913 GN=AMELX PE=1 SV=2	1	hf1_10472_ebo_30_1_261219.ScanId;v=1;d1=7415.7415.3	controllerType=0 controllerNumber=1 scan=7415	21.1418
07088:3	1	S.M[+15.995]PLPPHPGHPG.Y		M[+16]	384.862	3	1152.57	1152.56	0	7.9	17	Non	430.28	374.65	34.48	6.61	1703	>sp|P02817|AMELX_BOVIN Amelogenin, X isoform OS=Bos taurus OX=9913 GN=AMELX PE=1 SV=2	1	hf1_10472_ebo_30_1_261219.ScanId;v=1;d1=7000.7000.3	controllerType=0 controllerNumber=1 scan=7000	20.4465
06494:3	1	S.M[+15.995]PLPPHPGHPG.Y		M[+16]	384.861	3	1152.57	1152.56	0	6.7	17	Non	433.26	410.66	37.82	6.61	1703	>sp|P02817|AMELX_BOVIN Amelogenin, X isoform OS=Bos taurus OX=9913 GN=AMELX PE=1 SV=2	1	hf1_10472_ebo_30_1_261219.ScanId;v=1;d1=6582.6582.3	controllerType=0 controllerNumber=1 scan=6582	19.7485
07104:2	1	S.M[+15.995]PLPPHPGHPG.Y		M[+16]	576.789	2	1152.57	1152.56	0	8	17	Non	445.21	328.87	70.03	5.13	1703	>sp|P02817|AMELX_BOVIN Amelogenin, X isoform OS=Bos taurus OX=9913 GN=AMELX PE=1 SV=2	1	hf1_10472_ebo_30_1_261219.ScanId;v=1;d1=7011.7011.2	controllerType=0 controllerNumber=1 scan=7011	20.4654
06797:3	1	S.M[+15.995]PLPPHPGHPG.Y		M[+16]	384.861	3	1152.57	1152.56	0	6.8	17	Non	445.63	393.96	34.5	6.53	1703	>sp|P02817|AMELX_BOVIN Amelogenin, X isoform OS=Bos taurus OX=9913 GN=AMELX PE=1 SV=2	1	hf1_10472_ebo_30_1_261219.ScanId;v=1;d1=6791.6791.3	controllerType=0 controllerNumber=1 scan=6791	20.0967
05336:3	1	S.M[+15.995]PLPPHPGHPG.Y		M[+16]	384.861	3	1152.57	1152.56	0	7	17	Non	455	411.15	51.12	6.53	1703	>sp|P02817|AMELX_BOVIN Amelogenin, X isoform OS=Bos taurus OX=9913 GN=AMELX PE=1 SV=2	1	hf1_10472_ebo_30_1_261219.ScanId;v=1;d1=5764.5764.3	controllerType=0 controllerNumber=1 scan=5764	18.3625
06683:3	1	S.M[+31.990]PLPPHPGHPG.Y		M[+32]	390.193	3	1168.57	1168.56	0	7	17	Non	471.06	412.74	16.7	6.53	1703	>sp|P02817|AMELX_BOVIN Amelogenin, X isoform OS=Bos taurus OX=9913 GN=AMELX PE=1 SV=2	1	hf1_10472_ebo_30_1_261219.ScanId;v=1;d1=6714.6714.3	controllerType=0 controllerNumber=1 scan=6714	19.9715
05904:3	1	S.M[+15.995]PLPPHPGHPG.Y		M[+16]	384.862	3	1152.57	1152.56	0	7.7	17	Non	480.07	446.3	35.3	6.69	1703	>sp|P02817|AMELX_BOVIN Amelogenin, X isoform OS=Bos taurus OX=9913 GN=AMELX PE=1 SV=2	1	hf1_10472_ebo_30_1_261219.ScanId;v=1;d1=6173.6173.3	controllerType=0 controllerNumber=1 scan=6173	19.0593
04744:2	1	S.M[+15.995]PLPPHPGHPG.Y		M[+16]	576.788	2	1152.57	1152.56	0	5.8	17	Non	508.88	431.09	63.6	7.03	1703	>sp|P02817|AMELX_BOVIN Amelogenin, X isoform OS=Bos taurus OX=9913 GN=AMELX PE=1 SV=2	1	hf1_10472_ebo_30_1_261219.ScanId;v=1;d1=5349.5349.2	controllerType=0 controllerNumber=1 scan=5349	17.6579
06200:3	1	S.M[+15.995]PLPPHPGHPG.Y		M[+16]	384.862	3	1152.57	1152.56	0	8.5	17	Non	518.59	466.22	71.92	6.35	1703	>sp|P02817|AMELX_BOVIN Amelogenin, X isoform OS=Bos taurus OX=9913 GN=AMELX PE=1 SV=2	1	hf1_10472_ebo_30_1_261219.ScanId;v=1;d1=6381.6381.3	controllerType=0 controllerNumber=1 scan=6381	19.4116
06812:2	1	S.M[+15.995]PLPPHPGHPG.Y		M[+16]	576.788	2	1152.57	1152.56	0	5.7	17	Non	522.16	402.83	72.15	6.54	1703	>sp|P02817|AMELX_BOVIN Amelogenin, X isoform OS=Bos taurus OX=9913 GN=AMELX PE=1 SV=2	1	hf1_10472_ebo_30_1_261219.ScanId;v=1;d1=6802.6802.2	controllerType=0 controllerNumber=1 scan=6802	20.1132
50149:2	1	S.M[+15.995]PLPPHPGHPG.Y		M[+16]	576.788	2	1152.57	1152.56	0	5.7	17	Non	532.98	428.44	64.36	6.54	1703	>sp|P02817|AMELX_BOVIN Amelogenin, X isoform OS=Bos taurus OX=9913 GN=AMELX PE=1 SV=2	1	hf1_10472_ebo_30_1_261219.ScanId;v=1;d1=36400.36400.2	controllerType=0 controllerNumber=1 scan=36400	73.5033
05626:2	1	S.M[+15.995]PLPPHPGHPG.Y		M[+16]	576.788	2	1152.57	1152.56	0	6.1	17	Non	555.41	451.99	75.36	7.14	1703	>sp|P02817|AMELX_BOVIN Amelogenin, X isoform OS=Bos taurus OX=9913 GN=AMELX PE=1 SV=2	1	hf1_10472_ebo_30_1_261219.ScanId;v=1;d1=5965.5965.2	controllerType=0 controllerNumber=1 scan=5965	18.7089
05036:2	1	S.M[+15.995]PLPPHPGHPG.Y		M[+16]	576.787	2	1152.57	1152.56	0	4.9	17	Non	557.35	535.44	65.84	7.14	1703	>sp|P02817|AMELX_BOVIN Amelogenin, X isoform OS=Bos taurus OX=9913 GN=AMELX PE=1 SV=2	1	hf1_10472_ebo_30_1_261219.ScanId;v=1;d1=5557.5557.2	controllerType=0 controllerNumber=1 scan=5557	18.0123
05905:2	1	S.M[+15.995]PLPPHPGHPG.Y		M[+16]	576.788	2	1152.57	1152.56	0	6.2	17	Non	564.99	426.14	71.25	7.92	1703	>sp|P02817|AMELX_BOVIN Amelogenin, X isoform OS=Bos taurus OX=9913 GN=AMELX PE=1 SV=2	1	hf1_10472_ebo_30_1_261219.ScanId;v=1;d1=6174.6174.2	controllerType=0 controllerNumber=1 scan=6174	19.06
06510:2	1	S.M[+15.995]PLPPHPGHPG.Y		M[+16]	576.788	2	1152.57	1152.56	0	6.7	17	Non	606.65	458.26	95.7	8.15	1703	>sp|P02817|AMELX_BOVIN Amelogenin, X isoform OS=Bos taurus OX=9913 GN=AMELX PE=1 SV=2	1	hf1_10472_ebo_30_1_261219.ScanId;v=1;d1=6593.6593.2	controllerType=0 controllerNumber=1 scan=6593	19.7662
06201:2	1	S.M[+15.995]PLPPHPGHPG.Y		M[+16]	576.788	2	1152.57	1152.56	0	6.8	17	Non	608.04	445.71	99.22	8.85	1703	>sp|P02817|AMELX_BOVIN Amelogenin, X isoform OS=Bos taurus OX=9913 GN=AMELX PE=1 SV=2	1	hf1_10472_ebo_30_1_261219.ScanId;v=1;d1=6382.6382.2	controllerType=0 controllerNumber=1 scan=6382	19.4122
05338:2	1	S.M[+15.995]PLPPHPGHPG.Y		M[+16]	576.788	2	1152.57	1152.56	0	5.8	17	Non	611.38	497.75	108.77	8.92	1703	>sp|P02817|AMELX_BOVIN Amelogenin, X isoform OS=Bos taurus OX=9913 GN=AMELX PE=1 SV=2	1	hf1_10472_ebo_30_1_261219.ScanId;v=1;d1=5766.5766.2	controllerType=0 controllerNumber=1 scan=5766	18.3638
03467:3	1	S.M[+15.995]PLP[+15.995]PHPGHPG.Y		M[+16], P[+16]	390.192	3	1168.56	1168.56	0	5	17	Non	210.46	177.24	13.66	2.39	1703	>sp|P02817|AMELX_BOVIN Amelogenin, X isoform OS=Bos taurus OX=9913 GN=AMELX PE=1 SV=2	1	hf1_10472_ebo_30_1_261219.ScanId;v=1;d1=4445.4445.3	controllerType=0 controllerNumber=1 scan=4445	16.1334
05912:3	1	S.M[+15.995]PLPPHPGH[+15.995]PG.Y		H[+16], M[+16]	390.192	3	1168.56	1168.56	0	5.1	17	Non	255.05	255.05	5.73	4.38	1703	>sp|P02817|AMELX_BOVIN Amelogenin, X isoform OS=Bos taurus OX=9913 GN=AMELX PE=1 SV=2	1	hf1_10472_ebo_30_1_261219.ScanId;v=1;d1=6178.6178.3	controllerType=0 controllerNumber=1 scan=6178	19.0645
09164:2	1	S.M[+15.995]PLPPHPGH[+15.995]PG.Y		H[+16], M[+16]	584.786	2	1168.56	1168.56	0	6.8	17	Non	272.68	201.94	0	4.38	1703	>sp|P02817|AMELX_BOVIN Amelogenin, X isoform OS=Bos taurus OX=9913 GN=AMELX PE=1 SV=2	1	hf1_10472_ebo_30_1_261219.ScanId;v=1;d1=8429.8429.2	controllerType=0 controllerNumber=1 scan=8429	22.8648
03279:3	1	S.M[+15.995]P[+15.995]LPPHPGHPG.Y		M[+16], P[+16]	390.193	3	1168.56	1168.56	0	5.4	17	Non	272.79	227.51	2.6	4.17	1703	>sp|P02817|AMELX_BOVIN Amelogenin, X isoform OS=Bos taurus OX=9913 GN=AMELX PE=1 SV=2	1	hf1_10472_ebo_30_1_261219.ScanId;v=1;d1=4313.4313.3	controllerType=0 controllerNumber=1 scan=4313	15.9195
05305:3	1	S.M[+15.995]PLPPHPGHP[+15.995]G.Y		M[+16], P[+16]	390.192	3	1168.56	1168.56	0	4.4	17	Non	348.17	216.15	4.95	4.55	1703	>sp|P02817|AMELX_BOVIN Amelogenin, X isoform OS=Bos taurus OX=9913 GN=AMELX PE=1 SV=2	1	hf1_10472_ebo_30_1_261219.ScanId;v=1;d1=5742.5742.3	controllerType=0 controllerNumber=1 scan=5742	18.327
05004:3	1	S.M[+15.995]PLPPHPGHP[+15.995]G.Y		M[+16], P[+16]	390.192	3	1168.56	1168.56	0	5.4	17	Non	352.98	352.98	9.93	5.08	1703	>sp|P02817|AMELX_BOVIN Amelogenin, X isoform OS=Bos taurus OX=9913 GN=AMELX PE=1 SV=2	1	hf1_10472_ebo_30_1_261219.ScanId;v=1;d1=5535.5535.3	controllerType=0 controllerNumber=1 scan=5535	17.9755
03710:3	1	S.M[+15.995]PLPPHPGHP[+15.995]G.Y		M[+16], P[+16]	390.193	3	1168.56	1168.56	0	6.1	17	Non	363.51	315.21	11.98	5.02	1703	>sp|P02817|AMELX_BOVIN Amelogenin, X isoform OS=Bos taurus OX=9913 GN=AMELX PE=1 SV=2	1	hf1_10472_ebo_30_1_261219.ScanId;v=1;d1=4623.4623.3	controllerType=0 controllerNumber=1 scan=4623	16.4323
04700:2	1	S.M[+15.995]PLPPHPGHP[+15.995]G.Y		M[+16], P[+16]	584.785	2	1168.56	1168.56	0	4.8	17	Non	365.81	267.2	55.6	5.03	1703	>sp|P02817|AMELX_BOVIN Amelogenin, X isoform OS=Bos taurus OX=9913 GN=AMELX PE=1 SV=2	1	hf1_10472_ebo_30_1_261219.ScanId;v=1;d1=5317.5317.2	controllerType=0 controllerNumber=1 scan=5317	17.6017
04721:3	1	S.M[+15.995]PLPPHPGHP[+15.995]G.Y		M[+16], P[+16]	390.193	3	1168.56	1168.56	0	5.7	17	Non	378.47	340.74	12.35	4.98	1703	>sp|P02817|AMELX_BOVIN Amelogenin, X isoform OS=Bos taurus OX=9913 GN=AMELX PE=1 SV=2	1	hf1_10472_ebo_30_1_261219.ScanId;v=1;d1=5331.5331.3	controllerType=0 controllerNumber=1 scan=5331	17.6281
04424:2	1	S.M[+15.995]PLPPHPGHP[+15.995]G.Y		M[+16], P[+16]	584.785	2	1168.56	1168.56	0	6	17	Non	385.48	295.17	38.3	5.15	1703	>sp|P02817|AMELX_BOVIN Amelogenin, X isoform OS=Bos taurus OX=9913 GN=AMELX PE=1 SV=2	1	hf1_10472_ebo_30_1_261219.ScanId;v=1;d1=5118.5118.2	controllerType=0 controllerNumber=1 scan=5118	17.2611
04140:3	1	S.M[+15.995]PLPPHPGHP[+15.995]G.Y		M[+16], P[+16]	390.193	3	1168.56	1168.56	0	6.4	17	Non	405.14	338.62	16.14	5.67	1703	>sp|P02817|AMELX_BOVIN Amelogenin, X isoform OS=Bos taurus OX=9913 GN=AMELX PE=1 SV=2	1	hf1_10472_ebo_30_1_261219.ScanId;v=1;d1=4917.4917.3	controllerType=0 controllerNumber=1 scan=4917	16.9217
03830:2	1	S.M[+15.995]PLPPHPGHP[+15.995]G.Y		M[+16], P[+16]	584.786	2	1168.56	1168.56	0	6.3	17	Non	406.12	302.2	61.08	5.13	1703	>sp|P02817|AMELX_BOVIN Amelogenin, X isoform OS=Bos taurus OX=9913 GN=AMELX PE=1 SV=2	1	hf1_10472_ebo_30_1_261219.ScanId;v=1;d1=4702.4702.2	controllerType=0 controllerNumber=1 scan=4702	16.5617
04442:3	1	S.M[+15.995]PLPPHPGHP[+15.995]G.Y		M[+16], P[+16]	390.193	3	1168.56	1168.56	0	5.6	17	Non	407.36	353.78	13.73	5.03	1703	>sp|P02817|AMELX_BOVIN Amelogenin, X isoform OS=Bos taurus OX=9913 GN=AMELX PE=1 SV=2	1	hf1_10472_ebo_30_1_261219.ScanId;v=1;d1=5129.5129.3	controllerType=0 controllerNumber=1 scan=5129	17.2785
04135:2	1	S.M[+15.995]PLPPHPGHP[+15.995]G.Y		M[+16], P[+16]	584.786	2	1168.56	1168.56	0	6.1	17	Non	421.07	309.78	62.28	5.34	1703	>sp|P02817|AMELX_BOVIN Amelogenin, X isoform OS=Bos taurus OX=9913 GN=AMELX PE=1 SV=2	1	hf1_10472_ebo_30_1_261219.ScanId;v=1;d1=4914.4914.2	controllerType=0 controllerNumber=1 scan=4914	16.918
12092:3	1	S.MPLPPHPGHPGY.I			433.884	3	1299.64	1299.63	0	5.3	17	Non	370.81	263.75	263.75	4.74	1703	>sp|P02817|AMELX_BOVIN Amelogenin, X isoform OS=Bos taurus OX=9913 GN=AMELX PE=1 SV=2	1	hf1_10472_ebo_30_1_261219.ScanId;v=1;d1=10445.10445.3	controllerType=0 controllerNumber=1 scan=10445	26.3216
12834:2	1	S.MPLPPHPGHPGY.I			650.322	2	1299.64	1299.63	0	5.4	17	Non	407.59	301.34	301.34	5.18	1703	>sp|P02817|AMELX_BOVIN Amelogenin, X isoform OS=Bos taurus OX=9913 GN=AMELX PE=1 SV=2	1	hf1_10472_ebo_30_1_261219.ScanId;v=1;d1=10948.10948.2	controllerType=0 controllerNumber=1 scan=10948	27.1919
12381:3	1	S.MPLPPHPGHPGY.I			433.884	3	1299.64	1299.63	0	5.4	17	Non	419.49	304.54	304.54	5.06	1703	>sp|P02817|AMELX_BOVIN Amelogenin, X isoform OS=Bos taurus OX=9913 GN=AMELX PE=1 SV=2	1	hf1_10472_ebo_30_1_261219.ScanId;v=1;d1=10644.10644.3	controllerType=0 controllerNumber=1 scan=10644	26.6705
10503:3	1	S.M[+31.990]PLPPHPGHPGY.I		M[+32]	444.547	3	1331.63	1331.62	0	5	17	Non	199.23	184.58	7	2.39	1703	>sp|P02817|AMELX_BOVIN Amelogenin, X isoform OS=Bos taurus OX=9913 GN=AMELX PE=1 SV=2	1	hf1_10472_ebo_30_1_261219.ScanId;v=1;d1=9351.9351.3	controllerType=0 controllerNumber=1 scan=9351	24.4359
11381:3	1	S.M[+15.995]PLPPHPGHPGY.I		M[+16]	439.217	3	1315.64	1315.63	0	7.5	17	Non	282.98	205.5	17.91	4.2	1703	>sp|P02817|AMELX_BOVIN Amelogenin, X isoform OS=Bos taurus OX=9913 GN=AMELX PE=1 SV=2	1	hf1_10472_ebo_30_1_261219.ScanId;v=1;d1=9958.9958.3	controllerType=0 controllerNumber=1 scan=9958	25.4779
10455:3	1	S.M[+15.995]PLPPHPGHPGY.I		M[+16]	439.217	3	1315.64	1315.63	0	9.7	17	Non	289.27	205.08	33.12	3.87	1703	>sp|P02817|AMELX_BOVIN Amelogenin, X isoform OS=Bos taurus OX=9913 GN=AMELX PE=1 SV=2	1	hf1_10472_ebo_30_1_261219.ScanId;v=1;d1=9314.9314.3	controllerType=0 controllerNumber=1 scan=9314	24.3717
09900:3	1	S.M[+31.990]PLPPHPGHPGY.I		M[+32]	444.548	3	1331.63	1331.62	0	6.1	17	Non	306.9	248.29	6.99	4.64	1703	>sp|P02817|AMELX_BOVIN Amelogenin, X isoform OS=Bos taurus OX=9913 GN=AMELX PE=1 SV=2	1	hf1_10472_ebo_30_1_261219.ScanId;v=1;d1=8920.8920.3	controllerType=0 controllerNumber=1 scan=8920	23.71
09971:2	1	S.M[+15.995]PLPPHPGHPGY.I		M[+16]	658.321	2	1315.63	1315.63	0	6.6	17	Non	332.03	211.43	19.84	4.57	1703	>sp|P02817|AMELX_BOVIN Amelogenin, X isoform OS=Bos taurus OX=9913 GN=AMELX PE=1 SV=2	1	hf1_10472_ebo_30_1_261219.ScanId;v=1;d1=8970.8970.2	controllerType=0 controllerNumber=1 scan=8970	23.7949
50070:3	1	S.M[+15.995]PLPPHPGHPGY.I		M[+16]	439.216	3	1315.63	1315.63	0	7.2	17	Non	345.51	282.17	33.67	4.85	1703	>sp|P02817|AMELX_BOVIN Amelogenin, X isoform OS=Bos taurus OX=9913 GN=AMELX PE=1 SV=2	1	hf1_10472_ebo_30_1_261219.ScanId;v=1;d1=36344.36344.3	controllerType=0 controllerNumber=1 scan=36344	73.4074
10198:3	1	S.MP[+31.990]LPPHPGHPGY.I		P[+32]	444.547	3	1331.63	1331.62	0	4.9	17	Non	359.25	315.18	0.56	4.87	1703	>sp|P02817|AMELX_BOVIN Amelogenin, X isoform OS=Bos taurus OX=9913 GN=AMELX PE=1 SV=2	1	hf1_10472_ebo_30_1_261219.ScanId;v=1;d1=9130.9130.3	controllerType=0 controllerNumber=1 scan=9130	24.0687
08161:2	1	S.M[+15.995]PLPPHPGHPGY.I		M[+16]	658.32	2	1315.63	1315.63	0	6	17	Non	479.01	347.99	38.03	5.19	1703	>sp|P02817|AMELX_BOVIN Amelogenin, X isoform OS=Bos taurus OX=9913 GN=AMELX PE=1 SV=2	1	hf1_10472_ebo_30_1_261219.ScanId;v=1;d1=7753.7753.2	controllerType=0 controllerNumber=1 scan=7753	21.714
09275:3	1	S.M[+15.995]PLPPHPGHPGY.I		M[+16]	439.217	3	1315.64	1315.63	0	8.2	17	Non	501.38	420.32	41.3	6.69	1703	>sp|P02817|AMELX_BOVIN Amelogenin, X isoform OS=Bos taurus OX=9913 GN=AMELX PE=1 SV=2	1	hf1_10472_ebo_30_1_261219.ScanId;v=1;d1=8506.8506.3	controllerType=0 controllerNumber=1 scan=8506	22.9962
09590:3	1	S.M[+15.995]PLPPHPGHPGY.I		M[+16]	439.217	3	1315.64	1315.63	0	8.1	17	Non	503.47	412.74	40.52	6.69	1703	>sp|P02817|AMELX_BOVIN Amelogenin, X isoform OS=Bos taurus OX=9913 GN=AMELX PE=1 SV=2	1	hf1_10472_ebo_30_1_261219.ScanId;v=1;d1=8710.8710.3	controllerType=0 controllerNumber=1 scan=8710	23.3481
08964:3	1	S.M[+15.995]PLPPHPGHPGY.I		M[+16]	439.216	3	1315.63	1315.63	0	7.1	17	Non	503.79	448.76	45.21	6.69	1703	>sp|P02817|AMELX_BOVIN Amelogenin, X isoform OS=Bos taurus OX=9913 GN=AMELX PE=1 SV=2	1	hf1_10472_ebo_30_1_261219.ScanId;v=1;d1=8297.8297.3	controllerType=0 controllerNumber=1 scan=8297	22.6403
08662:3	1	S.M[+15.995]PLPPHPGHPGY.I		M[+16]	439.216	3	1315.63	1315.63	0	6.6	17	Non	533.66	466.43	42.92	6.8	1703	>sp|P02817|AMELX_BOVIN Amelogenin, X isoform OS=Bos taurus OX=9913 GN=AMELX PE=1 SV=2	1	hf1_10472_ebo_30_1_261219.ScanId;v=1;d1=8096.8096.3	controllerType=0 controllerNumber=1 scan=8096	22.2914
10029:2	1	S.M[+15.995]PLPPHPGHPGY.I		M[+16]	658.32	2	1315.63	1315.63	0	6	17	Non	539.62	414.28	62.63	6.4	1703	>sp|P02817|AMELX_BOVIN Amelogenin, X isoform OS=Bos taurus OX=9913 GN=AMELX PE=1 SV=2	1	hf1_10472_ebo_30_1_261219.ScanId;v=1;d1=9011.9011.2	controllerType=0 controllerNumber=1 scan=9011	23.8671
08361:3	1	S.M[+15.995]PLPPHPGHPGY.I		M[+16]	439.216	3	1315.63	1315.63	0	5.8	17	Non	542.7	480.26	45.14	6.87	1703	>sp|P02817|AMELX_BOVIN Amelogenin, X isoform OS=Bos taurus OX=9913 GN=AMELX PE=1 SV=2	1	hf1_10472_ebo_30_1_261219.ScanId;v=1;d1=7889.7889.3	controllerType=0 controllerNumber=1 scan=7889	21.9431
09388:2	1	S.M[+15.995]PLPPHPGHPGY.I		M[+16]	658.321	2	1315.63	1315.63	0	7	17	Non	548.59	404.42	50.5	6.47	1703	>sp|P02817|AMELX_BOVIN Amelogenin, X isoform OS=Bos taurus OX=9913 GN=AMELX PE=1 SV=2	1	hf1_10472_ebo_30_1_261219.ScanId;v=1;d1=8578.8578.2	controllerType=0 controllerNumber=1 scan=8578	23.1236
08466:2	1	S.M[+15.995]PLPPHPGHPGY.I		M[+16]	658.32	2	1315.63	1315.63	0	6	17	Non	559.28	424.15	67.73	7.14	1703	>sp|P02817|AMELX_BOVIN Amelogenin, X isoform OS=Bos taurus OX=9913 GN=AMELX PE=1 SV=2	1	hf1_10472_ebo_30_1_261219.ScanId;v=1;d1=7960.7960.2	controllerType=0 controllerNumber=1 scan=7960	22.0637
09695:2	1	S.M[+15.995]PLPPHPGHPGY.I		M[+16]	658.32	2	1315.63	1315.63	0	5.4	17	Non	592.44	437.73	83.78	7.32	1703	>sp|P02817|AMELX_BOVIN Amelogenin, X isoform OS=Bos taurus OX=9913 GN=AMELX PE=1 SV=2	1	hf1_10472_ebo_30_1_261219.ScanId;v=1;d1=8780.8780.2	controllerType=0 controllerNumber=1 scan=8780	23.4673
08769:2	1	S.M[+15.995]PLPPHPGHPGY.I		M[+16]	658.32	2	1315.63	1315.63	0	6	17	Non	603.16	442.47	79.01	8.92	1703	>sp|P02817|AMELX_BOVIN Amelogenin, X isoform OS=Bos taurus OX=9913 GN=AMELX PE=1 SV=2	1	hf1_10472_ebo_30_1_261219.ScanId;v=1;d1=8168.8168.2	controllerType=0 controllerNumber=1 scan=8168	22.4159
09082:2	1	S.M[+15.995]PLPPHPGHPGY.I		M[+16]	658.321	2	1315.63	1315.63	0	6.6	17	Non	627.86	429.57	65.3	8.85	1703	>sp|P02817|AMELX_BOVIN Amelogenin, X isoform OS=Bos taurus OX=9913 GN=AMELX PE=1 SV=2	1	hf1_10472_ebo_30_1_261219.ScanId;v=1;d1=8374.8374.2	controllerType=0 controllerNumber=1 scan=8374	22.7697
06694:3	1	S.M[+15.995]PLPPHPGHP[+15.995]GY.I		M[+16], P[+16]	444.548	3	1331.63	1331.62	0	6.9	17	Non	175.92	172.31	3.53	2.37	1703	>sp|P02817|AMELX_BOVIN Amelogenin, X isoform OS=Bos taurus OX=9913 GN=AMELX PE=1 SV=2	1	hf1_10472_ebo_30_1_261219.ScanId;v=1;d1=6723.6723.3	controllerType=0 controllerNumber=1 scan=6723	19.9849
07747:3	1	S.M[+15.995]PLPPHPGHP[+15.995]GY.I		M[+16], P[+16]	444.547	3	1331.63	1331.62	0	5.5	17	Non	289.22	273.81	5.82	4.64	1703	>sp|P02817|AMELX_BOVIN Amelogenin, X isoform OS=Bos taurus OX=9913 GN=AMELX PE=1 SV=2	1	hf1_10472_ebo_30_1_261219.ScanId;v=1;d1=7461.7461.3	controllerType=0 controllerNumber=1 scan=7461	21.2198
08040:3	1	S.M[+15.995]PLPPHPGHP[+15.995]GY.I		M[+16], P[+16]	444.547	3	1331.63	1331.62	0	5.3	17	Non	385.37	385.37	6.41	5.88	1703	>sp|P02817|AMELX_BOVIN Amelogenin, X isoform OS=Bos taurus OX=9913 GN=AMELX PE=1 SV=2	1	hf1_10472_ebo_30_1_261219.ScanId;v=1;d1=7667.7667.3	controllerType=0 controllerNumber=1 scan=7667	21.5672
07123:3	1	S.M[+15.995]PLPPHPGHP[+15.995]GY.I		M[+16], P[+16]	444.548	3	1331.63	1331.62	0	7.2	17	Non	400.11	400.11	19.12	6	1703	>sp|P02817|AMELX_BOVIN Amelogenin, X isoform OS=Bos taurus OX=9913 GN=AMELX PE=1 SV=2	1	hf1_10472_ebo_30_1_261219.ScanId;v=1;d1=7027.7027.3	controllerType=0 controllerNumber=1 scan=7027	20.4909
13513:3	1	S.M[+15.995]PLPPHPGHPGYI.N		M[+16]	476.911	3	1428.72	1428.71	0	6.8	17	Non	423.76	342.03	14.26	4.92	1703	>sp|P02817|AMELX_BOVIN Amelogenin, X isoform OS=Bos taurus OX=9913 GN=AMELX PE=1 SV=2	1	hf1_10472_ebo_30_1_261219.ScanId;v=1;d1=11411.11411.3	controllerType=0 controllerNumber=1 scan=11411	27.992
12633:3	1	S.M[+15.995]PLPPHPGHPGYI.N		M[+16]	476.911	3	1428.72	1428.71	0	6.3	17	Non	464.6	397.52	26.76	5.83	1703	>sp|P02817|AMELX_BOVIN Amelogenin, X isoform OS=Bos taurus OX=9913 GN=AMELX PE=1 SV=2	1	hf1_10472_ebo_30_1_261219.ScanId;v=1;d1=10816.10816.3	controllerType=0 controllerNumber=1 scan=10816	26.9678
13219:3	1	S.M[+15.995]PLPPHPGHPGYI.N		M[+16]	476.911	3	1428.72	1428.71	0	6.4	17	Non	503.63	449.33	22.78	5.99	1703	>sp|P02817|AMELX_BOVIN Amelogenin, X isoform OS=Bos taurus OX=9913 GN=AMELX PE=1 SV=2	1	hf1_10472_ebo_30_1_261219.ScanId;v=1;d1=11213.11213.3	controllerType=0 controllerNumber=1 scan=11213	27.6542
12929:3	1	S.M[+15.995]PLPPHPGHPGYI.N		M[+16]	476.911	3	1428.72	1428.71	0	6.3	17	Non	532.95	457.39	26.53	6.8	1703	>sp|P02817|AMELX_BOVIN Amelogenin, X isoform OS=Bos taurus OX=9913 GN=AMELX PE=1 SV=2	1	hf1_10472_ebo_30_1_261219.ScanId;v=1;d1=11016.11016.3	controllerType=0 controllerNumber=1 scan=11016	27.3104
14709:3	1	S.MPLPPHPGHPGYIN.F			509.593	3	1526.76	1526.76	0	4.4	17	Non	406.44	299.15	299.15	4.92	1703	>sp|P02817|AMELX_BOVIN Amelogenin, X isoform OS=Bos taurus OX=9913 GN=AMELX PE=1 SV=2	1	hf1_10472_ebo_30_1_261219.ScanId;v=1;d1=12220.12220.3	controllerType=0 controllerNumber=1 scan=12220	29.313
14381:3	1	S.MPLPPHPGHPGYIN.F			509.594	3	1526.77	1526.76	0	6.5	17	Non	500.5	370.3	370.3	6.69	1703	>sp|P02817|AMELX_BOVIN Amelogenin, X isoform OS=Bos taurus OX=9913 GN=AMELX PE=1 SV=2	1	hf1_10472_ebo_30_1_261219.ScanId;v=1;d1=11996.11996.3	controllerType=0 controllerNumber=1 scan=11996	28.9588
13831:2	1	S.MPLPPHPGHPGYIN.F			763.888	2	1526.77	1526.76	0	7.1	17	Non	503.1	374.55	374.55	6.36	1703	>sp|P02817|AMELX_BOVIN Amelogenin, X isoform OS=Bos taurus OX=9913 GN=AMELX PE=1 SV=2	1	hf1_10472_ebo_30_1_261219.ScanId;v=1;d1=11622.11622.2	controllerType=0 controllerNumber=1 scan=11622	28.3424
13774:3	1	S.MPLPPHPGHPGYIN.F			509.593	3	1526.76	1526.76	0	4.9	17	Non	508.98	386.14	386.14	6.05	1703	>sp|P02817|AMELX_BOVIN Amelogenin, X isoform OS=Bos taurus OX=9913 GN=AMELX PE=1 SV=2	1	hf1_10472_ebo_30_1_261219.ScanId;v=1;d1=11582.11582.3	controllerType=0 controllerNumber=1 scan=11582	28.274
14073:3	1	S.MPLPPHPGHPGYIN.F			509.593	3	1526.76	1526.76	0	4.8	17	Non	535.85	431.91	431.91	6.87	1703	>sp|P02817|AMELX_BOVIN Amelogenin, X isoform OS=Bos taurus OX=9913 GN=AMELX PE=1 SV=2	1	hf1_10472_ebo_30_1_261219.ScanId;v=1;d1=11790.11790.3	controllerType=0 controllerNumber=1 scan=11790	28.6174
14443:2	1	S.MPLPPHPGHPGYIN.F			763.886	2	1526.77	1526.76	0	5.4	17	Non	600.04	422.01	422.01	8.22	1703	>sp|P02817|AMELX_BOVIN Amelogenin, X isoform OS=Bos taurus OX=9913 GN=AMELX PE=1 SV=2	1	hf1_10472_ebo_30_1_261219.ScanId;v=1;d1=12040.12040.2	controllerType=0 controllerNumber=1 scan=12040	29.0302
14130:2	1	S.MPLPPHPGHPGYIN.F			763.885	2	1526.76	1526.76	0	4.1	17	Non	648.56	469.19	469.19	7.7	1703	>sp|P02817|AMELX_BOVIN Amelogenin, X isoform OS=Bos taurus OX=9913 GN=AMELX PE=1 SV=2	1	hf1_10472_ebo_30_1_261219.ScanId;v=1;d1=11832.11832.2	controllerType=0 controllerNumber=1 scan=11832	28.6907
48371:3	1	S.MP[+15.995]LPPHPGHPGYIN.F		P[+16]	514.925	3	1542.76	1542.75	0	5.6	17	Non	129.78	129.78	4	2.31	1703	>sp|P02817|AMELX_BOVIN Amelogenin, X isoform OS=Bos taurus OX=9913 GN=AMELX PE=1 SV=2	1	hf1_10472_ebo_30_1_261219.ScanId;v=1;d1=35078.35078.3	controllerType=0 controllerNumber=1 scan=35078	70.6519
46681:3	1	S.MP[+15.995]LPPHPGHPGYIN.F		P[+16]	514.926	3	1542.76	1542.75	0	6.5	17	Non	130.84	130.84	4	1.41	1703	>sp|P02817|AMELX_BOVIN Amelogenin, X isoform OS=Bos taurus OX=9913 GN=AMELX PE=1 SV=2	1	hf1_10472_ebo_30_1_261219.ScanId;v=1;d1=33842.33842.3	controllerType=0 controllerNumber=1 scan=33842	68.0538
47903:3	1	S.MP[+15.995]LPPHPGHPGYIN.F		P[+16]	514.925	3	1542.76	1542.75	0	6	17	Non	146.01	146.01	4	1.45	1703	>sp|P02817|AMELX_BOVIN Amelogenin, X isoform OS=Bos taurus OX=9913 GN=AMELX PE=1 SV=2	1	hf1_10472_ebo_30_1_261219.ScanId;v=1;d1=34732.34732.3	controllerType=0 controllerNumber=1 scan=34732	69.9283
47670:3	1	S.MP[+15.995]LPPHPGHPGYIN.F		P[+16]	514.925	3	1542.76	1542.75	0	5.3	17	Non	147.06	147.06	4	2.31	1703	>sp|P02817|AMELX_BOVIN Amelogenin, X isoform OS=Bos taurus OX=9913 GN=AMELX PE=1 SV=2	1	hf1_10472_ebo_30_1_261219.ScanId;v=1;d1=34556.34556.3	controllerType=0 controllerNumber=1 scan=34556	69.5815
48141:3	1	S.MP[+15.995]LPPHPGHPGYIN.F		P[+16]	514.925	3	1542.76	1542.75	0	5.2	17	Non	157.43	157.43	4	2.31	1703	>sp|P02817|AMELX_BOVIN Amelogenin, X isoform OS=Bos taurus OX=9913 GN=AMELX PE=1 SV=2	1	hf1_10472_ebo_30_1_261219.ScanId;v=1;d1=34903.34903.3	controllerType=0 controllerNumber=1 scan=34903	70.2806
47213:3	1	S.MP[+15.995]LPPHPGHPGYIN.F		P[+16]	514.925	3	1542.76	1542.75	0	5.3	17	Non	158.34	158.34	4	1.45	1703	>sp|P02817|AMELX_BOVIN Amelogenin, X isoform OS=Bos taurus OX=9913 GN=AMELX PE=1 SV=2	1	hf1_10472_ebo_30_1_261219.ScanId;v=1;d1=34229.34229.3	controllerType=0 controllerNumber=1 scan=34229	68.9
49668:3	1	S.MP[+15.995]LPPHPGHPGYIN.F		P[+16]	514.926	3	1542.76	1542.75	0	6.3	17	Non	158.6	158.6	4	2.29	1703	>sp|P02817|AMELX_BOVIN Amelogenin, X isoform OS=Bos taurus OX=9913 GN=AMELX PE=1 SV=2	1	hf1_10472_ebo_30_1_261219.ScanId;v=1;d1=36051.36051.3	controllerType=0 controllerNumber=1 scan=36051	72.7779
49280:3	1	S.MP[+15.995]LPPHPGHPGYIN.F		P[+16]	514.925	3	1542.76	1542.75	0	6.2	17	Non	164.65	164.65	4	2.74	1703	>sp|P02817|AMELX_BOVIN Amelogenin, X isoform OS=Bos taurus OX=9913 GN=AMELX PE=1 SV=2	1	hf1_10472_ebo_30_1_261219.ScanId;v=1;d1=35756.35756.3	controllerType=0 controllerNumber=1 scan=35756	72.0868
46069:3	1	S.MP[+15.995]LPPHPGHPGYIN.F		P[+16]	514.925	3	1542.76	1542.75	0	5.4	17	Non	169.44	169.44	4	2.74	1703	>sp|P02817|AMELX_BOVIN Amelogenin, X isoform OS=Bos taurus OX=9913 GN=AMELX PE=1 SV=2	1	hf1_10472_ebo_30_1_261219.ScanId;v=1;d1=33367.33367.3	controllerType=0 controllerNumber=1 scan=33367	66.9858
46283:3	1	S.MP[+15.995]LPPHPGHPGYIN.F		P[+16]	514.925	3	1542.76	1542.75	0	5.4	17	Non	172.78	172.78	4	2.74	1703	>sp|P02817|AMELX_BOVIN Amelogenin, X isoform OS=Bos taurus OX=9913 GN=AMELX PE=1 SV=2	1	hf1_10472_ebo_30_1_261219.ScanId;v=1;d1=33539.33539.3	controllerType=0 controllerNumber=1 scan=33539	67.3601
49026:3	1	S.MP[+15.995]LPPHPGHPGYIN.F		P[+16]	514.925	3	1542.76	1542.75	0	5.9	17	Non	197.41	197.41	4	2.74	1703	>sp|P02817|AMELX_BOVIN Amelogenin, X isoform OS=Bos taurus OX=9913 GN=AMELX PE=1 SV=2	1	hf1_10472_ebo_30_1_261219.ScanId;v=1;d1=35574.35574.3	controllerType=0 controllerNumber=1 scan=35574	71.7375
14217:3	1	S.MP[+15.995]LPPHPGHPGYIN.F		P[+16]	514.925	3	1542.76	1542.75	0	5.1	17	Non	200.53	181.18	5.8	2.39	1703	>sp|P02817|AMELX_BOVIN Amelogenin, X isoform OS=Bos taurus OX=9913 GN=AMELX PE=1 SV=2	1	hf1_10472_ebo_30_1_261219.ScanId;v=1;d1=11889.11889.3	controllerType=0 controllerNumber=1 scan=11889	28.7837
00138:3	1	S.MP[+15.995]LPPHPGHPGYIN.F		P[+16]	514.925	3	1542.76	1542.75	0	4.7	17	Non	240.14	240.14	4	4.17	1703	>sp|P02817|AMELX_BOVIN Amelogenin, X isoform OS=Bos taurus OX=9913 GN=AMELX PE=1 SV=2	1	hf1_10472_ebo_30_1_261219.ScanId;v=1;d1=158.158.3	controllerType=0 controllerNumber=1 scan=158	0.5315
12164:3	1	S.MP[+15.995]LPPHPGHPGYIN.F		P[+16]	514.926	3	1542.76	1542.75	0	6.4	17	Non	295.86	295.86	4	4.7	1703	>sp|P02817|AMELX_BOVIN Amelogenin, X isoform OS=Bos taurus OX=9913 GN=AMELX PE=1 SV=2	1	hf1_10472_ebo_30_1_261219.ScanId;v=1;d1=10500.10500.3	controllerType=0 controllerNumber=1 scan=10500	26.421
12529:3	1	S.M[+31.990]PLPPHPGHPGYIN.F		M[+32]	520.257	3	1558.76	1558.75	0	5.8	17	Non	316.73	290.85	10.31	4.6	1703	>sp|P02817|AMELX_BOVIN Amelogenin, X isoform OS=Bos taurus OX=9913 GN=AMELX PE=1 SV=2	1	hf1_10472_ebo_30_1_261219.ScanId;v=1;d1=10749.10749.3	controllerType=0 controllerNumber=1 scan=10749	26.8518
13043:3	1	S.M[+15.995]PLPPHPGHPGYIN.F		M[+16]	514.926	3	1542.76	1542.75	0	6.9	17	Non	317.36	317.36	7.62	4.7	1703	>sp|P02817|AMELX_BOVIN Amelogenin, X isoform OS=Bos taurus OX=9913 GN=AMELX PE=1 SV=2	1	hf1_10472_ebo_30_1_261219.ScanId;v=1;d1=11094.11094.3	controllerType=0 controllerNumber=1 scan=11094	27.4477
13347:3	1	S.M[+15.995]PLPPHPGHPGYIN.F		M[+16]	514.926	3	1542.76	1542.75	0	6.9	17	Non	325.49	310.45	2.31	4.63	1703	>sp|P02817|AMELX_BOVIN Amelogenin, X isoform OS=Bos taurus OX=9913 GN=AMELX PE=1 SV=2	1	hf1_10472_ebo_30_1_261219.ScanId;v=1;d1=11304.11304.3	controllerType=0 controllerNumber=1 scan=11304	27.8092
11596:3	1	S.M[+15.995]PLPPHPGHPGYIN.F		M[+16]	514.926	3	1542.76	1542.75	0	7.5	17	Non	336.26	336.26	9.31	4.88	1703	>sp|P02817|AMELX_BOVIN Amelogenin, X isoform OS=Bos taurus OX=9913 GN=AMELX PE=1 SV=2	1	hf1_10472_ebo_30_1_261219.ScanId;v=1;d1=10102.10102.3	controllerType=0 controllerNumber=1 scan=10102	25.7311
50123:2	1	S.M[+15.995]PLPPHPGHPGYIN.F		M[+16]	771.885	2	1542.76	1542.75	0	7	17	Non	360.08	356.3	14.42	5.29	1703	>sp|P02817|AMELX_BOVIN Amelogenin, X isoform OS=Bos taurus OX=9913 GN=AMELX PE=1 SV=2	1	hf1_10472_ebo_30_1_261219.ScanId;v=1;d1=36382.36382.2	controllerType=0 controllerNumber=1 scan=36382	73.4716
12229:3	1	S.M[+31.990]PLPPHPGHPGYIN.F		M[+32]	520.257	3	1558.76	1558.75	0	5.7	17	Non	363.13	363.13	11.25	5.88	1703	>sp|P02817|AMELX_BOVIN Amelogenin, X isoform OS=Bos taurus OX=9913 GN=AMELX PE=1 SV=2	1	hf1_10472_ebo_30_1_261219.ScanId;v=1;d1=10543.10543.3	controllerType=0 controllerNumber=1 scan=10543	26.4934
12488:2	1	S.M[+15.995]PLPPHPGHPGYIN.F		M[+16]	771.882	2	1542.76	1542.75	0	3.5	17	Non	390.02	390.02	39.02	5.68	1703	>sp|P02817|AMELX_BOVIN Amelogenin, X isoform OS=Bos taurus OX=9913 GN=AMELX PE=1 SV=2	1	hf1_10472_ebo_30_1_261219.ScanId;v=1;d1=10721.10721.2	controllerType=0 controllerNumber=1 scan=10721	26.8029
10155:3	1	S.M[+15.995]PLPPHPGHPGYIN.F		M[+16]	514.925	3	1542.76	1542.75	0	4.9	17	Non	395.03	395.03	4.45	6.02	1703	>sp|P02817|AMELX_BOVIN Amelogenin, X isoform OS=Bos taurus OX=9913 GN=AMELX PE=1 SV=2	1	hf1_10472_ebo_30_1_261219.ScanId;v=1;d1=9100.9100.3	controllerType=0 controllerNumber=1 scan=9100	24.0188
11952:3	1	S.M[+31.990]PLPPHPGHPGYIN.F		M[+32]	520.257	3	1558.76	1558.75	0	5.8	17	Non	395.65	395.65	19.41	5.88	1703	>sp|P02817|AMELX_BOVIN Amelogenin, X isoform OS=Bos taurus OX=9913 GN=AMELX PE=1 SV=2	1	hf1_10472_ebo_30_1_261219.ScanId;v=1;d1=10345.10345.3	controllerType=0 controllerNumber=1 scan=10345	26.1417
11654:3	1	S.M[+31.990]PLPPHPGHPGYIN.F		M[+32]	520.257	3	1558.76	1558.75	0	5.7	17	Non	405.05	405.05	12.5	5.93	1703	>sp|P02817|AMELX_BOVIN Amelogenin, X isoform OS=Bos taurus OX=9913 GN=AMELX PE=1 SV=2	1	hf1_10472_ebo_30_1_261219.ScanId;v=1;d1=10139.10139.3	controllerType=0 controllerNumber=1 scan=10139	25.7946
12203:2	1	S.M[+15.995]PLPPHPGHPGYIN.F		M[+16]	771.885	2	1542.76	1542.75	0	6.2	17	Non	411.32	411.32	55.27	6.34	1703	>sp|P02817|AMELX_BOVIN Amelogenin, X isoform OS=Bos taurus OX=9913 GN=AMELX PE=1 SV=2	1	hf1_10472_ebo_30_1_261219.ScanId;v=1;d1=10526.10526.2	controllerType=0 controllerNumber=1 scan=10526	26.4646
50125:3	1	S.M[+15.995]PLPPHPGHPGYIN.F		M[+16]	514.925	3	1542.76	1542.75	0	6.2	17	Non	426.6	426.6	4.42	5.97	1703	>sp|P02817|AMELX_BOVIN Amelogenin, X isoform OS=Bos taurus OX=9913 GN=AMELX PE=1 SV=2	1	hf1_10472_ebo_30_1_261219.ScanId;v=1;d1=36384.36384.3	controllerType=0 controllerNumber=1 scan=36384	73.4774
11303:3	1	S.M[+15.995]PLPPHPGHPGYIN.F		M[+16]	514.926	3	1542.76	1542.75	0	7.5	17	Non	450.95	450.95	11.67	6.53	1703	>sp|P02817|AMELX_BOVIN Amelogenin, X isoform OS=Bos taurus OX=9913 GN=AMELX PE=1 SV=2	1	hf1_10472_ebo_30_1_261219.ScanId;v=1;d1=9903.9903.3	controllerType=0 controllerNumber=1 scan=9903	25.3826
11012:3	1	S.MP[+15.995]LPPHPGHPGYIN.F		P[+16]	514.927	3	1542.77	1542.75	0	8.5	17	Non	457.78	457.78	4	6.19	1703	>sp|P02817|AMELX_BOVIN Amelogenin, X isoform OS=Bos taurus OX=9913 GN=AMELX PE=1 SV=2	1	hf1_10472_ebo_30_1_261219.ScanId;v=1;d1=9705.9705.3	controllerType=0 controllerNumber=1 scan=9705	25.04
15139:2	1	S.MPLPPHPGHPGYIN[+0.984].F		N[+1]	764.378	2	1527.75	1527.74	0	5.4	17	Non	464.79	401.62	401.62	6.13	1703	>sp|P02817|AMELX_BOVIN Amelogenin, X isoform OS=Bos taurus OX=9913 GN=AMELX PE=1 SV=2	1	hf1_10472_ebo_30_1_261219.ScanId;v=1;d1=12532.12532.2	controllerType=0 controllerNumber=1 scan=12532	29.8265
10449:3	1	S.MP[+15.995]LPPHPGHPGYIN.F		P[+16]	514.925	3	1542.76	1542.75	0	5.6	17	Non	466.55	466.55	4	6.6	1703	>sp|P02817|AMELX_BOVIN Amelogenin, X isoform OS=Bos taurus OX=9913 GN=AMELX PE=1 SV=2	1	hf1_10472_ebo_30_1_261219.ScanId;v=1;d1=9308.9308.3	controllerType=0 controllerNumber=1 scan=9308	24.3614
10732:3	1	S.M[+15.995]PLPPHPGHPGYIN.F		M[+16]	514.926	3	1542.76	1542.75	0	7.9	17	Non	497.75	497.75	4.29	6.69	1703	>sp|P02817|AMELX_BOVIN Amelogenin, X isoform OS=Bos taurus OX=9913 GN=AMELX PE=1 SV=2	1	hf1_10472_ebo_30_1_261219.ScanId;v=1;d1=9509.9509.3	controllerType=0 controllerNumber=1 scan=9509	24.7028
15000:3	1	S.MPLPPHPGHPGYIN[+0.984].F		N[+1]	509.921	3	1527.75	1527.74	0	4	17	Non	543.56	517.1	517.1	6.25	1703	>sp|P02817|AMELX_BOVIN Amelogenin, X isoform OS=Bos taurus OX=9913 GN=AMELX PE=1 SV=2	1	hf1_10472_ebo_30_1_261219.ScanId;v=1;d1=12431.12431.3	controllerType=0 controllerNumber=1 scan=12431	29.6582
10172:2	1	S.M[+15.995]PLPPHPGHPGYIN.F		M[+16]	771.884	2	1542.76	1542.75	0	6	17	Non	545.4	524.09	56.26	6.54	1703	>sp|P02817|AMELX_BOVIN Amelogenin, X isoform OS=Bos taurus OX=9913 GN=AMELX PE=1 SV=2	1	hf1_10472_ebo_30_1_261219.ScanId;v=1;d1=9112.9112.2	controllerType=0 controllerNumber=1 scan=9112	24.0387
11632:2	1	S.M[+15.995]PLPPHPGHPGYIN.F		M[+16]	771.885	2	1542.76	1542.75	0	6.1	17	Non	568.75	549.83	50.21	7.22	1703	>sp|P02817|AMELX_BOVIN Amelogenin, X isoform OS=Bos taurus OX=9913 GN=AMELX PE=1 SV=2	1	hf1_10472_ebo_30_1_261219.ScanId;v=1;d1=10124.10124.2	controllerType=0 controllerNumber=1 scan=10124	25.7673
15318:3	1	S.MPLPPHPGHPGYIN[+0.984].F		N[+1]	509.922	3	1527.75	1527.74	0	6.2	17	Non	571.01	527.88	527.88	7.58	1703	>sp|P02817|AMELX_BOVIN Amelogenin, X isoform OS=Bos taurus OX=9913 GN=AMELX PE=1 SV=2	1	hf1_10472_ebo_30_1_261219.ScanId;v=1;d1=12657.12657.3	controllerType=0 controllerNumber=1 scan=12657	30.0417
11042:2	1	S.M[+15.995]PLPPHPGHPGYIN.F		M[+16]	771.885	2	1542.76	1542.75	0	6.5	17	Non	624.59	613.39	53.49	8.15	1703	>sp|P02817|AMELX_BOVIN Amelogenin, X isoform OS=Bos taurus OX=9913 GN=AMELX PE=1 SV=2	1	hf1_10472_ebo_30_1_261219.ScanId;v=1;d1=9726.9726.2	controllerType=0 controllerNumber=1 scan=9726	25.078
11331:2	1	S.M[+15.995]PLPPHPGHPGYIN.F		M[+16]	771.884	2	1542.76	1542.75	0	5.7	17	Non	631.02	622.84	61.91	8.22	1703	>sp|P02817|AMELX_BOVIN Amelogenin, X isoform OS=Bos taurus OX=9913 GN=AMELX PE=1 SV=2	1	hf1_10472_ebo_30_1_261219.ScanId;v=1;d1=9923.9923.2	controllerType=0 controllerNumber=1 scan=9923	25.4195
10465:2	1	S.M[+15.995]PLPPHPGHPGYIN.F		M[+16]	771.884	2	1542.76	1542.75	0	4.9	17	Non	633.69	603.49	56.9	8.22	1703	>sp|P02817|AMELX_BOVIN Amelogenin, X isoform OS=Bos taurus OX=9913 GN=AMELX PE=1 SV=2	1	hf1_10472_ebo_30_1_261219.ScanId;v=1;d1=9321.9321.2	controllerType=0 controllerNumber=1 scan=9321	24.3849
10767:2	1	S.M[+15.995]PLPPHPGHPGYIN.F		M[+16]	771.884	2	1542.76	1542.75	0	6	17	Non	669.74	641.18	54.62	9.92	1703	>sp|P02817|AMELX_BOVIN Amelogenin, X isoform OS=Bos taurus OX=9913 GN=AMELX PE=1 SV=2	1	hf1_10472_ebo_30_1_261219.ScanId;v=1;d1=9531.9531.2	controllerType=0 controllerNumber=1 scan=9531	24.7379
12938:2	1	S.M[+15.995]PLPPHPGHPGYIN[+0.984].F		M[+16], N[+1]	772.375	2	1543.74	1543.74	0	3.7	17	Non	176.26	153.52	19.97	1.3	1703	>sp|P02817|AMELX_BOVIN Amelogenin, X isoform OS=Bos taurus OX=9913 GN=AMELX PE=1 SV=2	1	hf1_10472_ebo_30_1_261219.ScanId;v=1;d1=11022.11022.5	controllerType=0 controllerNumber=1 scan=11022	27.322
11362:3	1	S.M[+15.995]PLPPHP[+15.995]GHPGYIN.F		M[+16], P[+16]	520.257	3	1558.76	1558.75	0	5.9	17	Non	204.73	204.73	0.72	1.88	1703	>sp|P02817|AMELX_BOVIN Amelogenin, X isoform OS=Bos taurus OX=9913 GN=AMELX PE=1 SV=2	1	hf1_10472_ebo_30_1_261219.ScanId;v=1;d1=9945.9945.3	controllerType=0 controllerNumber=1 scan=9945	25.4567
09127:3	1	S.MP[+15.995]LPPHPGHP[+15.995]GYIN.F		P[+16]*2	520.256	3	1558.75	1558.75	0	4	17	Non	226.85	226.85	0.99	2.3	1703	>sp|P02817|AMELX_BOVIN Amelogenin, X isoform OS=Bos taurus OX=9913 GN=AMELX PE=1 SV=2	1	hf1_10472_ebo_30_1_261219.ScanId;v=1;d1=8405.8405.3	controllerType=0 controllerNumber=1 scan=8405	22.8206
13332:3	1	S.M[+31.990]PLPPHPGHPGYIN[+0.984].F		M[+32], N[+1]	520.585	3	1559.74	1559.73	0	6.5	17	Non	239.28	239.28	6.61	2.51	1703	>sp|P02817|AMELX_BOVIN Amelogenin, X isoform OS=Bos taurus OX=9913 GN=AMELX PE=1 SV=2	1	hf1_10472_ebo_30_1_261219.ScanId;v=1;d1=11292.11292.3	controllerType=0 controllerNumber=1 scan=11292	27.7895
13196:3	1	S.M[+31.990]PLPPHPGHPGYIN[+0.984].F		M[+32], N[+1]	520.586	3	1559.74	1559.73	0	7.1	17	Non	244.68	244.68	8.79	3.69	1703	>sp|P02817|AMELX_BOVIN Amelogenin, X isoform OS=Bos taurus OX=9913 GN=AMELX PE=1 SV=2	1	hf1_10472_ebo_30_1_261219.ScanId;v=1;d1=11194.11194.3	controllerType=0 controllerNumber=1 scan=11194	27.6179
11068:3	1	S.M[+15.995]PLPPHPGHP[+15.995]GYIN.F		M[+16], P[+16]	520.257	3	1558.76	1558.75	0	5.3	17	Non	265.61	265.61	0.95	4.38	1703	>sp|P02817|AMELX_BOVIN Amelogenin, X isoform OS=Bos taurus OX=9913 GN=AMELX PE=1 SV=2	1	hf1_10472_ebo_30_1_261219.ScanId;v=1;d1=9742.9742.3	controllerType=0 controllerNumber=1 scan=9742	25.1019
10308:3	1	S.M[+15.995]PLPPHPGHP[+15.995]GYIN.F		M[+16], P[+16]	520.257	3	1558.76	1558.75	0	6.6	17	Non	278.85	278.85	1.47	4.31	1703	>sp|P02817|AMELX_BOVIN Amelogenin, X isoform OS=Bos taurus OX=9913 GN=AMELX PE=1 SV=2	1	hf1_10472_ebo_30_1_261219.ScanId;v=1;d1=9206.9206.3	controllerType=0 controllerNumber=1 scan=9206	24.1866
13094:2	1	S.M[+15.995]PLPPHPGHPGYIN[+0.984].F		M[+16], N[+1]	772.375	2	1543.74	1543.74	0	3.7	17	Non	321.02	315.25	40.35	4.52	1703	>sp|P02817|AMELX_BOVIN Amelogenin, X isoform OS=Bos taurus OX=9913 GN=AMELX PE=1 SV=2	1	hf1_10472_ebo_30_1_261219.ScanId;v=1;d1=11127.11127.2	controllerType=0 controllerNumber=1 scan=11127	27.5034
10006:3	1	S.M[+15.995]PLPPHPGHP[+15.995]GYIN.F		M[+16], P[+16]	520.257	3	1558.76	1558.75	0	6.3	17	Non	324.82	324.82	9.59	4.88	1703	>sp|P02817|AMELX_BOVIN Amelogenin, X isoform OS=Bos taurus OX=9913 GN=AMELX PE=1 SV=2	1	hf1_10472_ebo_30_1_261219.ScanId;v=1;d1=8996.8996.3	controllerType=0 controllerNumber=1 scan=8996	23.8419
11633:2	1	S.M[+15.995]PLPPHPGHPGYIN[+0.984].F		M[+16], N[+1]	772.378	2	1543.75	1543.74	0	7.9	17	Non	370.66	361.97	31.72	6.09	1703	>sp|P02817|AMELX_BOVIN Amelogenin, X isoform OS=Bos taurus OX=9913 GN=AMELX PE=1 SV=2	1	hf1_10472_ebo_30_1_261219.ScanId;v=1;d1=10124.10124.2	controllerType=0 controllerNumber=1 scan=10124	25.7673
09611:2	1	S.M[+15.995]PLPPHPGHP[+15.995]GYIN.F		M[+16], P[+16]	779.883	2	1558.76	1558.75	0	7.8	17	Non	374.07	248.12	0	4.78	1703	>sp|P02817|AMELX_BOVIN Amelogenin, X isoform OS=Bos taurus OX=9913 GN=AMELX PE=1 SV=2	1	hf1_10472_ebo_30_1_261219.ScanId;v=1;d1=8724.8724.2	controllerType=0 controllerNumber=1 scan=8724	23.3708
10591:3	1	S.M[+15.995]PLPPHPGHP[+15.995]GYIN.F		M[+16], P[+16]	520.257	3	1558.76	1558.75	0	5.2	17	Non	379.26	379.26	10.01	5.88	1703	>sp|P02817|AMELX_BOVIN Amelogenin, X isoform OS=Bos taurus OX=9913 GN=AMELX PE=1 SV=2	1	hf1_10472_ebo_30_1_261219.ScanId;v=1;d1=9411.9411.3	controllerType=0 controllerNumber=1 scan=9411	24.5362
09726:3	1	S.M[+15.995]PLPPHPGHP[+15.995]GYIN.F		M[+16], P[+16]	520.257	3	1558.76	1558.75	0	6.3	17	Non	424.13	424.13	9.54	6	1703	>sp|P02817|AMELX_BOVIN Amelogenin, X isoform OS=Bos taurus OX=9913 GN=AMELX PE=1 SV=2	1	hf1_10472_ebo_30_1_261219.ScanId;v=1;d1=8799.8799.3	controllerType=0 controllerNumber=1 scan=8799	23.4989
09419:3	1	S.M[+15.995]PLPPHPGHP[+15.995]GYIN.F		M[+16], P[+16]	520.258	3	1558.76	1558.75	0	7	17	Non	424.57	424.57	4.45	6	1703	>sp|P02817|AMELX_BOVIN Amelogenin, X isoform OS=Bos taurus OX=9913 GN=AMELX PE=1 SV=2	1	hf1_10472_ebo_30_1_261219.ScanId;v=1;d1=8600.8600.3	controllerType=0 controllerNumber=1 scan=8600	23.1616
09905:2	1	S.M[+15.995]PLPPHPGHP[+15.995]GYIN.F		M[+16], P[+16]	779.883	2	1558.76	1558.75	0	7.4	17	Non	427.33	317.15	0	5.12	1703	>sp|P02817|AMELX_BOVIN Amelogenin, X isoform OS=Bos taurus OX=9913 GN=AMELX PE=1 SV=2	1	hf1_10472_ebo_30_1_261219.ScanId;v=1;d1=8924.8924.2	controllerType=0 controllerNumber=1 scan=8924	23.7181
12801:2	1	S.M[+15.995]PLPPHPGHPGYIN[+0.984].F		M[+16], N[+1]	772.376	2	1543.74	1543.74	0	5.6	17	Non	453.9	395.17	44.53	6.13	1703	>sp|P02817|AMELX_BOVIN Amelogenin, X isoform OS=Bos taurus OX=9913 GN=AMELX PE=1 SV=2	1	hf1_10472_ebo_30_1_261219.ScanId;v=1;d1=10928.10928.2	controllerType=0 controllerNumber=1 scan=10928	27.1585
11885:3	1	S.M[+15.995]PLPPHPGHPGYIN[+0.984].F		M[+16], N[+1]	515.255	3	1543.75	1543.74	0	9.2	17	Non	481.17	481.17	10.06	6.35	1703	>sp|P02817|AMELX_BOVIN Amelogenin, X isoform OS=Bos taurus OX=9913 GN=AMELX PE=1 SV=2	1	hf1_10472_ebo_30_1_261219.ScanId;v=1;d1=10299.10299.3	controllerType=0 controllerNumber=1 scan=10299	26.0688
13044:3	1	S.M[+15.995]PLPPHPGHPGYIN[+0.984].F		M[+16], N[+1]	515.253	3	1543.74	1543.74	0	5	17	Non	485.89	485.89	5.96	6.05	1703	>sp|P02817|AMELX_BOVIN Amelogenin, X isoform OS=Bos taurus OX=9913 GN=AMELX PE=1 SV=2	1	hf1_10472_ebo_30_1_261219.ScanId;v=1;d1=11094.11094.3	controllerType=0 controllerNumber=1 scan=11094	27.4477
12750:3	1	S.M[+15.995]PLPPHPGHPGYIN[+0.984].F		M[+16], N[+1]	515.253	3	1543.74	1543.74	0	5.6	17	Non	495.41	495.41	23.3	6.76	1703	>sp|P02817|AMELX_BOVIN Amelogenin, X isoform OS=Bos taurus OX=9913 GN=AMELX PE=1 SV=2	1	hf1_10472_ebo_30_1_261219.ScanId;v=1;d1=10893.10893.3	controllerType=0 controllerNumber=1 scan=10893	27.1009
11933:2	1	S.M[+15.995]PLPPHPGHPGYIN[+0.984].F		M[+16], N[+1]	772.375	2	1543.74	1543.74	0	4.2	17	Non	510.84	509.93	73.26	6.43	1703	>sp|P02817|AMELX_BOVIN Amelogenin, X isoform OS=Bos taurus OX=9913 GN=AMELX PE=1 SV=2	1	hf1_10472_ebo_30_1_261219.ScanId;v=1;d1=10332.10332.2	controllerType=0 controllerNumber=1 scan=10332	26.1206
12165:3	1	S.M[+15.995]PLPPHPGHPGYIN[+0.984].F		M[+16], N[+1]	515.253	3	1543.74	1543.74	0	5.7	17	Non	513.19	513.19	2.31	6.76	1703	>sp|P02817|AMELX_BOVIN Amelogenin, X isoform OS=Bos taurus OX=9913 GN=AMELX PE=1 SV=2	1	hf1_10472_ebo_30_1_261219.ScanId;v=1;d1=10500.10500.3	controllerType=0 controllerNumber=1 scan=10500	26.421
12489:2	1	S.M[+15.995]PLPPHPGHPGYIN[+0.984].F		M[+16], N[+1]	772.375	2	1543.74	1543.74	0	4.9	17	Non	517.65	470.98	60.35	6.33	1703	>sp|P02817|AMELX_BOVIN Amelogenin, X isoform OS=Bos taurus OX=9913 GN=AMELX PE=1 SV=2	1	hf1_10472_ebo_30_1_261219.ScanId;v=1;d1=10721.10721.2	controllerType=0 controllerNumber=1 scan=10721	26.8029
12457:3	1	S.M[+15.995]PLPPHPGHPGYIN[+0.984].F		M[+16], N[+1]	515.253	3	1543.74	1543.74	0	5.4	17	Non	525.32	525.32	22.8	6.87	1703	>sp|P02817|AMELX_BOVIN Amelogenin, X isoform OS=Bos taurus OX=9913 GN=AMELX PE=1 SV=2	1	hf1_10472_ebo_30_1_261219.ScanId;v=1;d1=10699.10699.3	controllerType=0 controllerNumber=1 scan=10699	26.7636
12204:2	1	S.M[+15.995]PLPPHPGHPGYIN[+0.984].F		M[+16], N[+1]	772.375	2	1543.74	1543.74	0	4.5	17	Non	529.93	501.8	74.44	6.44	1703	>sp|P02817|AMELX_BOVIN Amelogenin, X isoform OS=Bos taurus OX=9913 GN=AMELX PE=1 SV=2	1	hf1_10472_ebo_30_1_261219.ScanId;v=1;d1=10526.10526.2	controllerType=0 controllerNumber=1 scan=10526	26.4646
46438:3	1	S.MPLPPHPGHPGYINF.S			558.616	3	1673.83	1673.83	0	4.2	17	Non	176.83	176.83	176.83	2.74	1703	>sp|P02817|AMELX_BOVIN Amelogenin, X isoform OS=Bos taurus OX=9913 GN=AMELX PE=1 SV=2	1	hf1_10472_ebo_30_1_261219.ScanId;v=1;d1=33658.33658.3	controllerType=0 controllerNumber=1 scan=33658	67.6132
49688:3	1	S.MPLPPHPGHPGYINF.S			558.615	3	1673.83	1673.83	0	3.4	17	Non	179.87	179.87	179.87	2.4	1703	>sp|P02817|AMELX_BOVIN Amelogenin, X isoform OS=Bos taurus OX=9913 GN=AMELX PE=1 SV=2	1	hf1_10472_ebo_30_1_261219.ScanId;v=1;d1=36064.36064.3	controllerType=0 controllerNumber=1 scan=36064	72.8007
47523:3	1	S.MPLPPHPGHPGYINF.S			558.617	3	1673.84	1673.83	0	5.9	17	Non	182.18	182.18	182.18	2.39	1703	>sp|P02817|AMELX_BOVIN Amelogenin, X isoform OS=Bos taurus OX=9913 GN=AMELX PE=1 SV=2	1	hf1_10472_ebo_30_1_261219.ScanId;v=1;d1=34445.34445.3	controllerType=0 controllerNumber=1 scan=34445	69.3454
47982:3	1	S.MPLPPHPGHPGYINF.S			558.616	3	1673.83	1673.83	0	4.5	17	Non	190.15	190.15	190.15	2.74	1703	>sp|P02817|AMELX_BOVIN Amelogenin, X isoform OS=Bos taurus OX=9913 GN=AMELX PE=1 SV=2	1	hf1_10472_ebo_30_1_261219.ScanId;v=1;d1=34789.34789.3	controllerType=0 controllerNumber=1 scan=34789	70.0421
47061:3	1	S.MPLPPHPGHPGYINF.S			558.615	3	1673.83	1673.83	0	2.8	17	Non	204.47	204.47	204.47	2.56	1703	>sp|P02817|AMELX_BOVIN Amelogenin, X isoform OS=Bos taurus OX=9913 GN=AMELX PE=1 SV=2	1	hf1_10472_ebo_30_1_261219.ScanId;v=1;d1=34122.34122.3	controllerType=0 controllerNumber=1 scan=34122	68.659
47283:3	1	S.MPLPPHPGHPGYINF.S			558.615	3	1673.83	1673.83	0	2.8	17	Non	214.84	214.84	214.84	2.56	1703	>sp|P02817|AMELX_BOVIN Amelogenin, X isoform OS=Bos taurus OX=9913 GN=AMELX PE=1 SV=2	1	hf1_10472_ebo_30_1_261219.ScanId;v=1;d1=34277.34277.3	controllerType=0 controllerNumber=1 scan=34277	69.0043
49338:3	1	S.MPLPPHPGHPGYINF.S			558.615	3	1673.83	1673.83	0	2.6	17	Non	230.84	230.84	230.84	2.66	1703	>sp|P02817|AMELX_BOVIN Amelogenin, X isoform OS=Bos taurus OX=9913 GN=AMELX PE=1 SV=2	1	hf1_10472_ebo_30_1_261219.ScanId;v=1;d1=35796.35796.3	controllerType=0 controllerNumber=1 scan=35796	72.1787
49954:3	1	S.MPLPPHPGHPGYINF.S			558.616	3	1673.83	1673.83	0	4.8	17	Non	245.05	245.05	245.05	4.54	1703	>sp|P02817|AMELX_BOVIN Amelogenin, X isoform OS=Bos taurus OX=9913 GN=AMELX PE=1 SV=2	1	hf1_10472_ebo_30_1_261219.ScanId;v=1;d1=36259.36259.3	controllerType=0 controllerNumber=1 scan=36259	73.2209
24693:2	1	S.MPLPPHPGHPGYINF.S			837.408	2	1673.81	1673.83	0	-9.9	17	Non	245.18	196.34	196.34	1.47	1703	>sp|P02817|AMELX_BOVIN Amelogenin, X isoform OS=Bos taurus OX=9913 GN=AMELX PE=1 SV=2	1	hf1_10472_ebo_30_1_261219.ScanId;v=1;d1=19164.19164.4	controllerType=0 controllerNumber=1 scan=19164	41.2303
49082:3	1	S.MPLPPHPGHPGYINF.S			558.615	3	1673.83	1673.83	0	3.5	17	Non	245.81	245.81	245.81	3.94	1703	>sp|P02817|AMELX_BOVIN Amelogenin, X isoform OS=Bos taurus OX=9913 GN=AMELX PE=1 SV=2	1	hf1_10472_ebo_30_1_261219.ScanId;v=1;d1=35614.35614.3	controllerType=0 controllerNumber=1 scan=35614	71.8127
46634:3	1	S.MPLPPHPGHPGYINF.S			558.618	3	1673.84	1673.83	0	7.5	17	Non	292.33	292.33	292.33	4.71	1703	>sp|P02817|AMELX_BOVIN Amelogenin, X isoform OS=Bos taurus OX=9913 GN=AMELX PE=1 SV=2	1	hf1_10472_ebo_30_1_261219.ScanId;v=1;d1=33806.33806.3	controllerType=0 controllerNumber=1 scan=33806	67.9662
20137:3	1	S.MPLPPHPGHPGYINF.S			558.618	3	1673.84	1673.83	0	8.8	17	Non	321.73	272.99	272.99	4.33	1703	>sp|P02817|AMELX_BOVIN Amelogenin, X isoform OS=Bos taurus OX=9913 GN=AMELX PE=1 SV=2	1	hf1_10472_ebo_30_1_261219.ScanId;v=1;d1=16109.16109.3	controllerType=0 controllerNumber=1 scan=16109	36.046
20432:3	1	S.MPLPPHPGHPGYINF.S			558.617	3	1673.84	1673.83	0	5.9	17	Non	361.38	356.3	356.3	4.93	1703	>sp|P02817|AMELX_BOVIN Amelogenin, X isoform OS=Bos taurus OX=9913 GN=AMELX PE=1 SV=2	1	hf1_10472_ebo_30_1_261219.ScanId;v=1;d1=16314.16314.3	controllerType=0 controllerNumber=1 scan=16314	36.3949
23173:3	1	S.MPLPPHPGHPGYINF.S			558.617	3	1673.84	1673.83	0	6.4	17	Non	385.8	334.29	334.29	4.88	1703	>sp|P02817|AMELX_BOVIN Amelogenin, X isoform OS=Bos taurus OX=9913 GN=AMELX PE=1 SV=2	1	hf1_10472_ebo_30_1_261219.ScanId;v=1;d1=18140.18140.3	controllerType=0 controllerNumber=1 scan=18140	39.5125
20736:3	1	S.MPLPPHPGHPGYINF.S			558.617	3	1673.84	1673.83	0	6.5	17	Non	408.75	387.42	387.42	6	1703	>sp|P02817|AMELX_BOVIN Amelogenin, X isoform OS=Bos taurus OX=9913 GN=AMELX PE=1 SV=2	1	hf1_10472_ebo_30_1_261219.ScanId;v=1;d1=16519.16519.3	controllerType=0 controllerNumber=1 scan=16519	36.7474
21023:3	1	S.MPLPPHPGHPGYINF.S			558.618	3	1673.84	1673.83	0	8	17	Non	459.28	434.64	434.64	5.93	1703	>sp|P02817|AMELX_BOVIN Amelogenin, X isoform OS=Bos taurus OX=9913 GN=AMELX PE=1 SV=2	1	hf1_10472_ebo_30_1_261219.ScanId;v=1;d1=16717.16717.3	controllerType=0 controllerNumber=1 scan=16717	37.0872
21319:3	1	S.MPLPPHPGHPGYINF.S			558.618	3	1673.84	1673.83	0	7.5	17	Non	461.82	427.45	427.45	5.83	1703	>sp|P02817|AMELX_BOVIN Amelogenin, X isoform OS=Bos taurus OX=9913 GN=AMELX PE=1 SV=2	1	hf1_10472_ebo_30_1_261219.ScanId;v=1;d1=16918.16918.3	controllerType=0 controllerNumber=1 scan=16918	37.4304
21929:2	1	S.MPLPPHPGHPGYINF.S			837.424	2	1673.84	1673.83	0	9.4	17	Non	521.62	448.03	448.03	6.03	1703	>sp|P02817|AMELX_BOVIN Amelogenin, X isoform OS=Bos taurus OX=9913 GN=AMELX PE=1 SV=2	1	hf1_10472_ebo_30_1_261219.ScanId;v=1;d1=17330.17330.2	controllerType=0 controllerNumber=1 scan=17330	38.14
21620:3	1	S.MPLPPHPGHPGYINF.S			558.617	3	1673.84	1673.83	0	6.5	17	Non	525.1	465.18	465.18	6.1	1703	>sp|P02817|AMELX_BOVIN Amelogenin, X isoform OS=Bos taurus OX=9913 GN=AMELX PE=1 SV=2	1	hf1_10472_ebo_30_1_261219.ScanId;v=1;d1=17119.17119.3	controllerType=0 controllerNumber=1 scan=17119	37.7719
20140:2	1	S.MPLPPHPGHPGYINF.S			837.421	2	1673.83	1673.83	0	5.3	17	Non	573.61	488.17	488.17	7.32	1703	>sp|P02817|AMELX_BOVIN Amelogenin, X isoform OS=Bos taurus OX=9913 GN=AMELX PE=1 SV=2	1	hf1_10472_ebo_30_1_261219.ScanId;v=1;d1=16110.16110.2	controllerType=0 controllerNumber=1 scan=16110	36.0466
20737:2	1	S.MPLPPHPGHPGYINF.S			837.422	2	1673.84	1673.83	0	6.4	17	Non	603.22	499.79	499.79	8.15	1703	>sp|P02817|AMELX_BOVIN Amelogenin, X isoform OS=Bos taurus OX=9913 GN=AMELX PE=1 SV=2	1	hf1_10472_ebo_30_1_261219.ScanId;v=1;d1=16520.16520.2	controllerType=0 controllerNumber=1 scan=16520	36.7482
20435:2	1	S.MPLPPHPGHPGYINF.S			837.421	2	1673.84	1673.83	0	5.6	17	Non	604.95	511.13	511.13	8.22	1703	>sp|P02817|AMELX_BOVIN Amelogenin, X isoform OS=Bos taurus OX=9913 GN=AMELX PE=1 SV=2	1	hf1_10472_ebo_30_1_261219.ScanId;v=1;d1=16316.16316.2	controllerType=0 controllerNumber=1 scan=16316	36.3964
21320:2	1	S.MPLPPHPGHPGYINF.S			837.423	2	1673.84	1673.83	0	7.8	17	Non	620.78	509	509	8.25	1703	>sp|P02817|AMELX_BOVIN Amelogenin, X isoform OS=Bos taurus OX=9913 GN=AMELX PE=1 SV=2	1	hf1_10472_ebo_30_1_261219.ScanId;v=1;d1=16919.16919.2	controllerType=0 controllerNumber=1 scan=16919	37.431
21027:2	1	S.MPLPPHPGHPGYINF.S			837.423	2	1673.84	1673.83	0	7.5	17	Non	661.4	580.8	580.8	9.15	1703	>sp|P02817|AMELX_BOVIN Amelogenin, X isoform OS=Bos taurus OX=9913 GN=AMELX PE=1 SV=2	1	hf1_10472_ebo_30_1_261219.ScanId;v=1;d1=16720.16720.2	controllerType=0 controllerNumber=1 scan=16720	37.0936
21631:2	1	S.MPLPPHPGHPGYINF.S			837.421	2	1673.84	1673.83	0	5.6	17	Non	736.73	624.2	624.2	10.92	1703	>sp|P02817|AMELX_BOVIN Amelogenin, X isoform OS=Bos taurus OX=9913 GN=AMELX PE=1 SV=2	1	hf1_10472_ebo_30_1_261219.ScanId;v=1;d1=17129.17129.2	controllerType=0 controllerNumber=1 scan=17129	37.7896
50338:3	1	S.MP[+15.995]LPPHPGHPGYINF.S		P[+16]	563.949	3	1689.83	1689.82	0	7	17	Non	163.85	163.85	4	2.69	1703	>sp|P02817|AMELX_BOVIN Amelogenin, X isoform OS=Bos taurus OX=9913 GN=AMELX PE=1 SV=2	1	hf1_10472_ebo_30_1_261219.ScanId;v=1;d1=36778.36778.3	controllerType=0 controllerNumber=1 scan=36778	75.3201
50345:3	1	S.MP[+15.995]LPPHPGHPGYINF.S		P[+16]	563.948	3	1689.83	1689.82	0	5.7	17	Non	172.78	172.78	4	2.74	1703	>sp|P02817|AMELX_BOVIN Amelogenin, X isoform OS=Bos taurus OX=9913 GN=AMELX PE=1 SV=2	1	hf1_10472_ebo_30_1_261219.ScanId;v=1;d1=36836.36836.3	controllerType=0 controllerNumber=1 scan=36836	75.66
23831:3	1	S.M[+15.995]PLPPHPGHPGYINF.S		M[+16]	563.947	3	1689.83	1689.82	0	4.4	17	Non	189.55	189.55	2.46	2.39	1703	>sp|P02817|AMELX_BOVIN Amelogenin, X isoform OS=Bos taurus OX=9913 GN=AMELX PE=1 SV=2	1	hf1_10472_ebo_30_1_261219.ScanId;v=1;d1=18574.18574.5	controllerType=0 controllerNumber=1 scan=18574	40.242
50351:3	1	S.MP[+15.995]LPPHPGHPGYINF.S		P[+16]	563.948	3	1689.83	1689.82	0	5.2	17	Non	208.53	208.53	4	3	1703	>sp|P02817|AMELX_BOVIN Amelogenin, X isoform OS=Bos taurus OX=9913 GN=AMELX PE=1 SV=2	1	hf1_10472_ebo_30_1_261219.ScanId;v=1;d1=36894.36894.3	controllerType=0 controllerNumber=1 scan=36894	76.0002
48515:2	1	S.M[+15.995]PLPPHPGHPGYINF.S		M[+16]	845.414	2	1689.82	1689.82	0	0.4	17	Non	210.96	210.96	14.39	2.92	1703	>sp|P02817|AMELX_BOVIN Amelogenin, X isoform OS=Bos taurus OX=9913 GN=AMELX PE=1 SV=2	1	hf1_10472_ebo_30_1_261219.ScanId;v=1;d1=35193.35193.2	controllerType=0 controllerNumber=1 scan=35193	70.9055
44655:3	1	S.MP[+15.995]LPPHPGHPGYINF.S		P[+16]	563.95	3	1689.83	1689.82	0	8	17	Non	213.16	213.16	4	2.95	1703	>sp|P02817|AMELX_BOVIN Amelogenin, X isoform OS=Bos taurus OX=9913 GN=AMELX PE=1 SV=2	1	hf1_10472_ebo_30_1_261219.ScanId;v=1;d1=32243.32243.3	controllerType=0 controllerNumber=1 scan=32243	64.5956
50307:3	1	S.MP[+15.995]LPPHPGHPGYINF.S		P[+16]	563.95	3	1689.84	1689.82	0	9.3	17	Non	231.81	231.81	4	2.81	1703	>sp|P02817|AMELX_BOVIN Amelogenin, X isoform OS=Bos taurus OX=9913 GN=AMELX PE=1 SV=2	1	hf1_10472_ebo_30_1_261219.ScanId;v=1;d1=36656.36656.3	controllerType=0 controllerNumber=1 scan=36656	74.6412
16922:3	1	S.MP[+15.995]LPPHPGHPGYINF.S		P[+16]	563.951	3	1689.84	1689.82	0	9.7	17	Non	234.3	234.3	4	2.69	1703	>sp|P02817|AMELX_BOVIN Amelogenin, X isoform OS=Bos taurus OX=9913 GN=AMELX PE=1 SV=2	1	hf1_10472_ebo_30_1_261219.ScanId;v=1;d1=13808.13808.3	controllerType=0 controllerNumber=1 scan=13808	32.032
21276:2	1	S.M[+15.995]PLPPHPGHPGYINF.S		M[+16]	845.419	2	1689.83	1689.82	0	5.5	17	Non	238.39	215.69	18.18	2.72	1703	>sp|P02817|AMELX_BOVIN Amelogenin, X isoform OS=Bos taurus OX=9913 GN=AMELX PE=1 SV=2	1	hf1_10472_ebo_30_1_261219.ScanId;v=1;d1=16891.16891.2	controllerType=0 controllerNumber=1 scan=16891	37.3833
17802:3	1	S.MP[+31.990]LPPHPGHPGYINF.S		P[+32]	569.28	3	1705.82	1705.82	0	5.4	17	Non	246.15	246.15	0	4.38	1703	>sp|P02817|AMELX_BOVIN Amelogenin, X isoform OS=Bos taurus OX=9913 GN=AMELX PE=1 SV=2	1	hf1_10472_ebo_30_1_261219.ScanId;v=1;d1=14457.14457.3	controllerType=0 controllerNumber=1 scan=14457	33.1833
19990:3	1	S.MP[+15.995]LPPHPGHPGYINF.S		P[+16]	563.948	3	1689.83	1689.82	0	4.6	17	Non	246.18	246.18	5.8	4.38	1703	>sp|P02817|AMELX_BOVIN Amelogenin, X isoform OS=Bos taurus OX=9913 GN=AMELX PE=1 SV=2	1	hf1_10472_ebo_30_1_261219.ScanId;v=1;d1=16010.16010.3	controllerType=0 controllerNumber=1 scan=16010	35.8787
18789:3	1	S.MP[+15.995]LPPHPGHPGYINF.S		P[+16]	563.95	3	1689.84	1689.82	0	9.3	17	Non	256.74	256.74	4	4.14	1703	>sp|P02817|AMELX_BOVIN Amelogenin, X isoform OS=Bos taurus OX=9913 GN=AMELX PE=1 SV=2	1	hf1_10472_ebo_30_1_261219.ScanId;v=1;d1=15169.15169.3	controllerType=0 controllerNumber=1 scan=15169	34.4407
19079:3	1	S.MP[+15.995]LPPHPGHPGYINF.S		P[+16]	563.95	3	1689.83	1689.82	0	8.4	17	Non	265.17	265.17	4	4.14	1703	>sp|P02817|AMELX_BOVIN Amelogenin, X isoform OS=Bos taurus OX=9913 GN=AMELX PE=1 SV=2	1	hf1_10472_ebo_30_1_261219.ScanId;v=1;d1=15376.15376.3	controllerType=0 controllerNumber=1 scan=15376	34.7911
50279:3	1	S.MP[+15.995]LPPHPGHPGYINF.S		P[+16]	563.95	3	1689.84	1689.82	0	8.6	17	Non	300.3	300.3	4	4.36	1703	>sp|P02817|AMELX_BOVIN Amelogenin, X isoform OS=Bos taurus OX=9913 GN=AMELX PE=1 SV=2	1	hf1_10472_ebo_30_1_261219.ScanId;v=1;d1=36591.36591.3	controllerType=0 controllerNumber=1 scan=36591	74.2988
17186:3	1	S.MP[+15.995]LPPHPGHPGYINF.S		P[+16]	563.95	3	1689.84	1689.82	0	9	17	Non	302.34	302.34	4	4.37	1703	>sp|P02817|AMELX_BOVIN Amelogenin, X isoform OS=Bos taurus OX=9913 GN=AMELX PE=1 SV=2	1	hf1_10472_ebo_30_1_261219.ScanId;v=1;d1=14000.14000.3	controllerType=0 controllerNumber=1 scan=14000	32.37
18074:3	1	S.M[+31.990]PLPPHPGHPGYINF.S		M[+32]	569.279	3	1705.82	1705.82	0	3.7	17	Non	307.98	307.98	8.06	4.15	1703	>sp|P02817|AMELX_BOVIN Amelogenin, X isoform OS=Bos taurus OX=9913 GN=AMELX PE=1 SV=2	1	hf1_10472_ebo_30_1_261219.ScanId;v=1;d1=14654.14654.3	controllerType=0 controllerNumber=1 scan=14654	33.5278
48735:2	1	S.M[+15.995]PLPPHPGHPGYINF.S		M[+16]	845.418	2	1689.83	1689.82	0	5.1	17	Non	308.71	308.71	21.15	5.2	1703	>sp|P02817|AMELX_BOVIN Amelogenin, X isoform OS=Bos taurus OX=9913 GN=AMELX PE=1 SV=2	1	hf1_10472_ebo_30_1_261219.ScanId;v=1;d1=35363.35363.3	controllerType=0 controllerNumber=1 scan=35363	71.2916
25306:3	1	S.MP[+15.995]LPPHPGHPGYINF.S		P[+16]	563.947	3	1689.83	1689.82	0	4.1	17	Non	320.67	320.67	4	4.76	1703	>sp|P02817|AMELX_BOVIN Amelogenin, X isoform OS=Bos taurus OX=9913 GN=AMELX PE=1 SV=2	1	hf1_10472_ebo_30_1_261219.ScanId;v=1;d1=19572.19572.3	controllerType=0 controllerNumber=1 scan=19572	41.9163
18517:3	1	S.MP[+15.995]LPPHPGHPGYINF.S		P[+16]	563.95	3	1689.84	1689.82	0	9	17	Non	322.75	322.75	4	4.53	1703	>sp|P02817|AMELX_BOVIN Amelogenin, X isoform OS=Bos taurus OX=9913 GN=AMELX PE=1 SV=2	1	hf1_10472_ebo_30_1_261219.ScanId;v=1;d1=14976.14976.3	controllerType=0 controllerNumber=1 scan=14976	34.1015
25683:3	1	S.MP[+15.995]LPPHPGHPGYINF.S		P[+16]	563.947	3	1689.83	1689.82	0	4.3	17	Non	323.01	323.01	4	4.93	1703	>sp|P02817|AMELX_BOVIN Amelogenin, X isoform OS=Bos taurus OX=9913 GN=AMELX PE=1 SV=2	1	hf1_10472_ebo_30_1_261219.ScanId;v=1;d1=19821.19821.3	controllerType=0 controllerNumber=1 scan=19821	42.3377
15564:3	1	S.M[+15.995]PLPPHPGHPGYINF.S		M[+16]	563.949	3	1689.83	1689.82	0	6.4	17	Non	329.69	329.69	3.71	4.86	1703	>sp|P02817|AMELX_BOVIN Amelogenin, X isoform OS=Bos taurus OX=9913 GN=AMELX PE=1 SV=2	1	hf1_10472_ebo_30_1_261219.ScanId;v=1;d1=12829.12829.3	controllerType=0 controllerNumber=1 scan=12829	30.3269
49882:3	1	S.MP[+15.995]LPPHPGHPGYINF.S		P[+16]	563.948	3	1689.83	1689.82	0	5.9	17	Non	332.22	332.22	4	4.93	1703	>sp|P02817|AMELX_BOVIN Amelogenin, X isoform OS=Bos taurus OX=9913 GN=AMELX PE=1 SV=2	1	hf1_10472_ebo_30_1_261219.ScanId;v=1;d1=36208.36208.3	controllerType=0 controllerNumber=1 scan=36208	73.1099
17455:3	1	S.MP[+15.995]LPPHPGHPGYINF.S		P[+16]	563.949	3	1689.83	1689.82	0	7.9	17	Non	332.59	332.59	4	4.88	1703	>sp|P02817|AMELX_BOVIN Amelogenin, X isoform OS=Bos taurus OX=9913 GN=AMELX PE=1 SV=2	1	hf1_10472_ebo_30_1_261219.ScanId;v=1;d1=14194.14194.3	controllerType=0 controllerNumber=1 scan=14194	32.7191
21773:2	1	S.M[+15.995]PLPPHPGHPGYINF.S		M[+16]	845.417	2	1689.83	1689.82	0	3.6	17	Non	333.63	266.5	21.93	3.61	1703	>sp|P02817|AMELX_BOVIN Amelogenin, X isoform OS=Bos taurus OX=9913 GN=AMELX PE=1 SV=2	1	hf1_10472_ebo_30_1_261219.ScanId;v=1;d1=17232.17232.2	controllerType=0 controllerNumber=1 scan=17232	37.9693
49660:3	1	S.MP[+15.995]LPPHPGHPGYINF.S		P[+16]	563.949	3	1689.83	1689.82	0	7.1	17	Non	336.65	336.65	4	4.86	1703	>sp|P02817|AMELX_BOVIN Amelogenin, X isoform OS=Bos taurus OX=9913 GN=AMELX PE=1 SV=2	1	hf1_10472_ebo_30_1_261219.ScanId;v=1;d1=36047.36047.3	controllerType=0 controllerNumber=1 scan=36047	72.7718
22899:3	1	S.MP[+15.995]LPPHPGHPGYINF.S		P[+16]	563.948	3	1689.83	1689.82	0	5.2	17	Non	338.22	334.2	4	4.93	1703	>sp|P02817|AMELX_BOVIN Amelogenin, X isoform OS=Bos taurus OX=9913 GN=AMELX PE=1 SV=2	1	hf1_10472_ebo_30_1_261219.ScanId;v=1;d1=17963.17963.3	controllerType=0 controllerNumber=1 scan=17963	39.2107
45297:3	1	S.MP[+15.995]LPPHPGHPGYINF.S		P[+16]	563.948	3	1689.83	1689.82	0	4.8	17	Non	339.31	339.31	4	4.94	1703	>sp|P02817|AMELX_BOVIN Amelogenin, X isoform OS=Bos taurus OX=9913 GN=AMELX PE=1 SV=2	1	hf1_10472_ebo_30_1_261219.ScanId;v=1;d1=32745.32745.3	controllerType=0 controllerNumber=1 scan=32745	65.6102
46471:2	1	S.M[+15.995]PLPPHPGHPGYINF.S		M[+16]	845.418	2	1689.83	1689.82	0	5.4	17	Non	341.59	341.59	25.43	5.22	1703	>sp|P02817|AMELX_BOVIN Amelogenin, X isoform OS=Bos taurus OX=9913 GN=AMELX PE=1 SV=2	1	hf1_10472_ebo_30_1_261219.ScanId;v=1;d1=33683.33683.3	controllerType=0 controllerNumber=1 scan=33683	67.6685
23553:3	1	S.MP[+15.995]LPPHPGHPGYINF.S		P[+16]	563.946	3	1689.82	1689.82	0	1.8	17	Non	343.59	343.59	4	4.23	1703	>sp|P02817|AMELX_BOVIN Amelogenin, X isoform OS=Bos taurus OX=9913 GN=AMELX PE=1 SV=2	1	hf1_10472_ebo_30_1_261219.ScanId;v=1;d1=18390.18390.3	controllerType=0 controllerNumber=1 scan=18390	39.9259
18346:3	1	S.M[+31.990]PLPPHPGHPGYINF.S		M[+32]	569.279	3	1705.82	1705.82	0	3.4	17	Non	345.6	345.6	8.48	4.31	1703	>sp|P02817|AMELX_BOVIN Amelogenin, X isoform OS=Bos taurus OX=9913 GN=AMELX PE=1 SV=2	1	hf1_10472_ebo_30_1_261219.ScanId;v=1;d1=14854.14854.3	controllerType=0 controllerNumber=1 scan=14854	33.8834
17984:3	1	S.MP[+15.995]LPPHPGHPGYINF.S		P[+16]	563.949	3	1689.83	1689.82	0	7.9	17	Non	346.28	346.28	4	4.88	1703	>sp|P02817|AMELX_BOVIN Amelogenin, X isoform OS=Bos taurus OX=9913 GN=AMELX PE=1 SV=2	1	hf1_10472_ebo_30_1_261219.ScanId;v=1;d1=14590.14590.3	controllerType=0 controllerNumber=1 scan=14590	33.4167
20288:3	1	S.MP[+15.995]LPPHPGHPGYINF.S		P[+16]	563.948	3	1689.83	1689.82	0	4.8	17	Non	347.13	347.13	5.8	4.93	1703	>sp|P02817|AMELX_BOVIN Amelogenin, X isoform OS=Bos taurus OX=9913 GN=AMELX PE=1 SV=2	1	hf1_10472_ebo_30_1_261219.ScanId;v=1;d1=16213.16213.3	controllerType=0 controllerNumber=1 scan=16213	36.2221
47345:2	1	S.M[+15.995]PLPPHPGHPGYINF.S		M[+16]	845.42	2	1689.83	1689.82	0	6.9	17	Non	348.3	348.3	33.12	5.29	1703	>sp|P02817|AMELX_BOVIN Amelogenin, X isoform OS=Bos taurus OX=9913 GN=AMELX PE=1 SV=2	1	hf1_10472_ebo_30_1_261219.ScanId;v=1;d1=34321.34321.3	controllerType=0 controllerNumber=1 scan=34321	69.0912
47527:3	1	S.MP[+15.995]LPPHPGHPGYINF.S		P[+16]	563.948	3	1689.83	1689.82	0	5.4	17	Non	349.81	349.81	4	4.94	1703	>sp|P02817|AMELX_BOVIN Amelogenin, X isoform OS=Bos taurus OX=9913 GN=AMELX PE=1 SV=2	1	hf1_10472_ebo_30_1_261219.ScanId;v=1;d1=34448.34448.3	controllerType=0 controllerNumber=1 scan=34448	69.3529
46875:2	1	S.M[+15.995]PLPPHPGHPGYINF.S		M[+16]	845.417	2	1689.83	1689.82	0	3.8	17	Non	351.49	351.49	23.69	4.75	1703	>sp|P02817|AMELX_BOVIN Amelogenin, X isoform OS=Bos taurus OX=9913 GN=AMELX PE=1 SV=2	1	hf1_10472_ebo_30_1_261219.ScanId;v=1;d1=33984.33984.3	controllerType=0 controllerNumber=1 scan=33984	68.3581
18626:3	1	S.MP[+31.990]LPPHPGHPGYINF.S		P[+32]	569.279	3	1705.82	1705.82	0	4.5	17	Non	351.52	351.52	0	4.93	1703	>sp|P02817|AMELX_BOVIN Amelogenin, X isoform OS=Bos taurus OX=9913 GN=AMELX PE=1 SV=2	1	hf1_10472_ebo_30_1_261219.ScanId;v=1;d1=15052.15052.3	controllerType=0 controllerNumber=1 scan=15052	34.2331
49499:3	1	S.MP[+15.995]LPPHPGHPGYINF.S		P[+16]	563.948	3	1689.83	1689.82	0	5.8	17	Non	352.67	352.67	4	4.94	1703	>sp|P02817|AMELX_BOVIN Amelogenin, X isoform OS=Bos taurus OX=9913 GN=AMELX PE=1 SV=2	1	hf1_10472_ebo_30_1_261219.ScanId;v=1;d1=35913.35913.3	controllerType=0 controllerNumber=1 scan=35913	72.4275
45105:3	1	S.MP[+15.995]LPPHPGHPGYINF.S		P[+16]	563.948	3	1689.83	1689.82	0	6.1	17	Non	354.36	354.36	4	5.08	1703	>sp|P02817|AMELX_BOVIN Amelogenin, X isoform OS=Bos taurus OX=9913 GN=AMELX PE=1 SV=2	1	hf1_10472_ebo_30_1_261219.ScanId;v=1;d1=32582.32582.3	controllerType=0 controllerNumber=1 scan=32582	65.2747
46058:3	1	S.MP[+15.995]LPPHPGHPGYINF.S		P[+16]	563.948	3	1689.83	1689.82	0	5.9	17	Non	354.45	354.45	4	4.93	1703	>sp|P02817|AMELX_BOVIN Amelogenin, X isoform OS=Bos taurus OX=9913 GN=AMELX PE=1 SV=2	1	hf1_10472_ebo_30_1_261219.ScanId;v=1;d1=33359.33359.3	controllerType=0 controllerNumber=1 scan=33359	66.9709
50450:3	1	S.MP[+15.995]LPPHPGHPGYINF.S		P[+16]	563.948	3	1689.83	1689.82	0	4.5	17	Non	354.54	354.54	4	4.94	1703	>sp|P02817|AMELX_BOVIN Amelogenin, X isoform OS=Bos taurus OX=9913 GN=AMELX PE=1 SV=2	1	hf1_10472_ebo_30_1_261219.ScanId;v=1;d1=37048.37048.3	controllerType=0 controllerNumber=1 scan=37048	76.6774
18895:3	1	S.M[+31.990]PLPPHPGHPGYINF.S		M[+32]	569.279	3	1705.82	1705.82	0	4.9	17	Non	357.93	357.93	9	4.94	1703	>sp|P02817|AMELX_BOVIN Amelogenin, X isoform OS=Bos taurus OX=9913 GN=AMELX PE=1 SV=2	1	hf1_10472_ebo_30_1_261219.ScanId;v=1;d1=15246.15246.3	controllerType=0 controllerNumber=1 scan=15246	34.5699
49030:3	1	S.MP[+15.995]LPPHPGHPGYINF.S		P[+16]	563.948	3	1689.83	1689.82	0	4.6	17	Non	361.62	361.62	4	5.88	1703	>sp|P02817|AMELX_BOVIN Amelogenin, X isoform OS=Bos taurus OX=9913 GN=AMELX PE=1 SV=2	1	hf1_10472_ebo_30_1_261219.ScanId;v=1;d1=35577.35577.3	controllerType=0 controllerNumber=1 scan=35577	71.7449
49231:2	1	S.M[+15.995]PLPPHPGHPGYINF.S		M[+16]	845.42	2	1689.83	1689.82	0	7.4	17	Non	362.47	362.47	17.63	6.07	1703	>sp|P02817|AMELX_BOVIN Amelogenin, X isoform OS=Bos taurus OX=9913 GN=AMELX PE=1 SV=2	1	hf1_10472_ebo_30_1_261219.ScanId;v=1;d1=35719.35719.2	controllerType=0 controllerNumber=1 scan=35719	72.0128
18240:3	1	S.MP[+15.995]LPPHPGHPGYINF.S		P[+16]	563.95	3	1689.83	1689.82	0	8.5	17	Non	362.95	362.95	4	5.47	1703	>sp|P02817|AMELX_BOVIN Amelogenin, X isoform OS=Bos taurus OX=9913 GN=AMELX PE=1 SV=2	1	hf1_10472_ebo_30_1_261219.ScanId;v=1;d1=14781.14781.3	controllerType=0 controllerNumber=1 scan=14781	33.7572
19394:2	1	S.M[+15.995]PLPPHPGHPGYINF.S		M[+16]	845.419	2	1689.83	1689.82	0	6.1	17	Non	364.82	356.2	16.62	5.22	1703	>sp|P02817|AMELX_BOVIN Amelogenin, X isoform OS=Bos taurus OX=9913 GN=AMELX PE=1 SV=2	1	hf1_10472_ebo_30_1_261219.ScanId;v=1;d1=15603.15603.2	controllerType=0 controllerNumber=1 scan=15603	35.1887
23503:3	1	S.MPLPPHPGHPGYIN[+0.984]F.S		N[+1]	558.945	3	1674.82	1674.81	0	5.8	17	Non	365.7	343.07	343.07	4.93	1703	>sp|P02817|AMELX_BOVIN Amelogenin, X isoform OS=Bos taurus OX=9913 GN=AMELX PE=1 SV=2	1	hf1_10472_ebo_30_1_261219.ScanId;v=1;d1=18357.18357.3	controllerType=0 controllerNumber=1 scan=18357	39.8728
47742:3	1	S.MP[+15.995]LPPHPGHPGYINF.S		P[+16]	563.948	3	1689.83	1689.82	0	5.8	17	Non	366.18	366.18	4	5.88	1703	>sp|P02817|AMELX_BOVIN Amelogenin, X isoform OS=Bos taurus OX=9913 GN=AMELX PE=1 SV=2	1	hf1_10472_ebo_30_1_261219.ScanId;v=1;d1=34612.34612.3	controllerType=0 controllerNumber=1 scan=34612	69.6887
47076:3	1	S.MP[+15.995]LPPHPGHPGYINF.S		P[+16]	563.947	3	1689.83	1689.82	0	3.6	17	Non	367.16	367.16	4	5.26	1703	>sp|P02817|AMELX_BOVIN Amelogenin, X isoform OS=Bos taurus OX=9913 GN=AMELX PE=1 SV=2	1	hf1_10472_ebo_30_1_261219.ScanId;v=1;d1=34131.34131.3	controllerType=0 controllerNumber=1 scan=34131	68.6756
48817:3	1	S.M[+15.995]PLPPHPGHPGYINF.S		M[+16]	563.948	3	1689.83	1689.82	0	5.3	17	Non	368.48	368.48	4.92	5.88	1703	>sp|P02817|AMELX_BOVIN Amelogenin, X isoform OS=Bos taurus OX=9913 GN=AMELX PE=1 SV=2	1	hf1_10472_ebo_30_1_261219.ScanId;v=1;d1=35421.35421.3	controllerType=0 controllerNumber=1 scan=35421	71.4084
17716:3	1	S.MP[+15.995]LPPHPGHPGYINF.S		P[+16]	563.949	3	1689.83	1689.82	0	7.4	17	Non	369.49	369.49	4	5.95	1703	>sp|P02817|AMELX_BOVIN Amelogenin, X isoform OS=Bos taurus OX=9913 GN=AMELX PE=1 SV=2	1	hf1_10472_ebo_30_1_261219.ScanId;v=1;d1=14392.14392.3	controllerType=0 controllerNumber=1 scan=14392	33.0668
49459:2	1	S.M[+15.995]PLPPHPGHPGYINF.S		M[+16]	845.419	2	1689.83	1689.82	0	5.6	17	Non	370.64	370.64	39.73	6.2	1703	>sp|P02817|AMELX_BOVIN Amelogenin, X isoform OS=Bos taurus OX=9913 GN=AMELX PE=1 SV=2	1	hf1_10472_ebo_30_1_261219.ScanId;v=1;d1=35882.35882.2	controllerType=0 controllerNumber=1 scan=35882	72.3605
49886:2	1	S.M[+15.995]PLPPHPGHPGYINF.S		M[+16]	845.418	2	1689.83	1689.82	0	5.3	17	Non	371.39	371.39	41.87	6.2	1703	>sp|P02817|AMELX_BOVIN Amelogenin, X isoform OS=Bos taurus OX=9913 GN=AMELX PE=1 SV=2	1	hf1_10472_ebo_30_1_261219.ScanId;v=1;d1=36211.36211.2	controllerType=0 controllerNumber=1 scan=36211	73.1145
45874:2	1	S.M[+15.995]PLPPHPGHPGYINF.S		M[+16]	845.42	2	1689.83	1689.82	0	7.5	17	Non	371.53	371.53	46.02	6.07	1703	>sp|P02817|AMELX_BOVIN Amelogenin, X isoform OS=Bos taurus OX=9913 GN=AMELX PE=1 SV=2	1	hf1_10472_ebo_30_1_261219.ScanId;v=1;d1=33226.33226.3	controllerType=0 controllerNumber=1 scan=33226	66.7135
50688:3	1	S.MP[+15.995]LPPHPGHPGYINF.S		P[+16]	563.949	3	1689.83	1689.82	0	7.3	17	Non	372.65	372.65	4	5.81	1703	>sp|P02817|AMELX_BOVIN Amelogenin, X isoform OS=Bos taurus OX=9913 GN=AMELX PE=1 SV=2	1	hf1_10472_ebo_30_1_261219.ScanId;v=1;d1=37321.37321.3	controllerType=0 controllerNumber=1 scan=37321	77.6932
46653:3	1	S.MP[+15.995]LPPHPGHPGYINF.S		P[+16]	563.948	3	1689.83	1689.82	0	5.7	17	Non	374.1	374.1	4	5.88	1703	>sp|P02817|AMELX_BOVIN Amelogenin, X isoform OS=Bos taurus OX=9913 GN=AMELX PE=1 SV=2	1	hf1_10472_ebo_30_1_261219.ScanId;v=1;d1=33819.33819.3	controllerType=0 controllerNumber=1 scan=33819	67.9958
47290:3	1	S.MP[+15.995]LPPHPGHPGYINF.S		P[+16]	563.948	3	1689.83	1689.82	0	6.2	17	Non	374.84	374.84	4	5.88	1703	>sp|P02817|AMELX_BOVIN Amelogenin, X isoform OS=Bos taurus OX=9913 GN=AMELX PE=1 SV=2	1	hf1_10472_ebo_30_1_261219.ScanId;v=1;d1=34283.34283.3	controllerType=0 controllerNumber=1 scan=34283	69.0163
49279:3	1	S.MP[+15.995]LPPHPGHPGYINF.S		P[+16]	563.95	3	1689.83	1689.82	0	8.2	17	Non	375.44	375.44	4	5.95	1703	>sp|P02817|AMELX_BOVIN Amelogenin, X isoform OS=Bos taurus OX=9913 GN=AMELX PE=1 SV=2	1	hf1_10472_ebo_30_1_261219.ScanId;v=1;d1=35755.35755.3	controllerType=0 controllerNumber=1 scan=35755	72.0853
47838:2	1	S.M[+15.995]PLPPHPGHPGYINF.S		M[+16]	845.416	2	1689.83	1689.82	0	2.8	17	Non	376.1	376.1	31.06	5.54	1703	>sp|P02817|AMELX_BOVIN Amelogenin, X isoform OS=Bos taurus OX=9913 GN=AMELX PE=1 SV=2	1	hf1_10472_ebo_30_1_261219.ScanId;v=1;d1=34686.34686.2	controllerType=0 controllerNumber=1 scan=34686	69.8414
20904:3	1	S.MP[+15.995]LPPHPGHPGYINF.S		P[+16]	563.948	3	1689.83	1689.82	0	4.5	17	Non	377.12	372.28	5.8	5.86	1703	>sp|P02817|AMELX_BOVIN Amelogenin, X isoform OS=Bos taurus OX=9913 GN=AMELX PE=1 SV=2	1	hf1_10472_ebo_30_1_261219.ScanId;v=1;d1=16638.16638.3	controllerType=0 controllerNumber=1 scan=16638	36.9494
46462:3	1	S.MP[+15.995]LPPHPGHPGYINF.S		P[+16]	563.948	3	1689.83	1689.82	0	4.7	17	Non	377.95	377.95	4	6.02	1703	>sp|P02817|AMELX_BOVIN Amelogenin, X isoform OS=Bos taurus OX=9913 GN=AMELX PE=1 SV=2	1	hf1_10472_ebo_30_1_261219.ScanId;v=1;d1=33676.33676.3	controllerType=0 controllerNumber=1 scan=33676	67.6549
46857:3	1	S.MP[+15.995]LPPHPGHPGYINF.S		P[+16]	563.948	3	1689.83	1689.82	0	5.7	17	Non	378.99	378.99	4	5.88	1703	>sp|P02817|AMELX_BOVIN Amelogenin, X isoform OS=Bos taurus OX=9913 GN=AMELX PE=1 SV=2	1	hf1_10472_ebo_30_1_261219.ScanId;v=1;d1=33972.33972.3	controllerType=0 controllerNumber=1 scan=33972	68.3356
21241:3	1	S.MP[+15.995]LPPHPGHPGYINF.S		P[+16]	563.948	3	1689.83	1689.82	0	5	17	Non	379.88	365.21	5.8	5.86	1703	>sp|P02817|AMELX_BOVIN Amelogenin, X isoform OS=Bos taurus OX=9913 GN=AMELX PE=1 SV=2	1	hf1_10472_ebo_30_1_261219.ScanId;v=1;d1=16870.16870.3	controllerType=0 controllerNumber=1 scan=16870	37.3477
48200:3	1	S.MP[+15.995]LPPHPGHPGYINF.S		P[+16]	563.948	3	1689.83	1689.82	0	6	17	Non	381.04	381.04	4	5.88	1703	>sp|P02817|AMELX_BOVIN Amelogenin, X isoform OS=Bos taurus OX=9913 GN=AMELX PE=1 SV=2	1	hf1_10472_ebo_30_1_261219.ScanId;v=1;d1=34946.34946.3	controllerType=0 controllerNumber=1 scan=34946	70.3689
50388:3	1	S.MP[+15.995]LPPHPGHPGYINF.S		P[+16]	563.947	3	1689.83	1689.82	0	3.8	17	Non	385.11	385.11	4	5.4	1703	>sp|P02817|AMELX_BOVIN Amelogenin, X isoform OS=Bos taurus OX=9913 GN=AMELX PE=1 SV=2	1	hf1_10472_ebo_30_1_261219.ScanId;v=1;d1=36964.36964.3	controllerType=0 controllerNumber=1 scan=36964	76.3367
48593:3	1	S.MP[+15.995]LPPHPGHPGYINF.S		P[+16]	563.948	3	1689.83	1689.82	0	6.1	17	Non	387.75	387.75	4	6.02	1703	>sp|P02817|AMELX_BOVIN Amelogenin, X isoform OS=Bos taurus OX=9913 GN=AMELX PE=1 SV=2	1	hf1_10472_ebo_30_1_261219.ScanId;v=1;d1=35253.35253.3	controllerType=0 controllerNumber=1 scan=35253	71.0549
47401:2	1	S.M[+15.995]PLPPHPGHPGYINF.S		M[+16]	845.419	2	1689.83	1689.82	0	5.7	17	Non	388.01	388.01	35.47	6.15	1703	>sp|P02817|AMELX_BOVIN Amelogenin, X isoform OS=Bos taurus OX=9913 GN=AMELX PE=1 SV=2	1	hf1_10472_ebo_30_1_261219.ScanId;v=1;d1=34358.34358.2	controllerType=0 controllerNumber=1 scan=34358	69.1639
46262:3	1	S.MP[+15.995]LPPHPGHPGYINF.S		P[+16]	563.946	3	1689.82	1689.82	0	2.4	17	Non	389.33	389.33	4	5.26	1703	>sp|P02817|AMELX_BOVIN Amelogenin, X isoform OS=Bos taurus OX=9913 GN=AMELX PE=1 SV=2	1	hf1_10472_ebo_30_1_261219.ScanId;v=1;d1=33519.33519.3	controllerType=0 controllerNumber=1 scan=33519	67.3136
21957:3	1	S.MP[+15.995]LPPHPGHPGYINF.S		P[+16]	563.947	3	1689.83	1689.82	0	4.3	17	Non	389.73	389.73	5.8	5.88	1703	>sp|P02817|AMELX_BOVIN Amelogenin, X isoform OS=Bos taurus OX=9913 GN=AMELX PE=1 SV=2	1	hf1_10472_ebo_30_1_261219.ScanId;v=1;d1=17346.17346.3	controllerType=0 controllerNumber=1 scan=17346	38.1646
50534:3	1	S.MP[+15.995]LPPHPGHPGYINF.S		P[+16]	563.948	3	1689.83	1689.82	0	4.9	17	Non	395.74	395.74	4	6.02	1703	>sp|P02817|AMELX_BOVIN Amelogenin, X isoform OS=Bos taurus OX=9913 GN=AMELX PE=1 SV=2	1	hf1_10472_ebo_30_1_261219.ScanId;v=1;d1=37141.37141.3	controllerType=0 controllerNumber=1 scan=37141	77.0164
50619:3	1	S.MP[+15.995]LPPHPGHPGYINF.S		P[+16]	563.948	3	1689.83	1689.82	0	5.3	17	Non	396.48	396.48	4	5.88	1703	>sp|P02817|AMELX_BOVIN Amelogenin, X isoform OS=Bos taurus OX=9913 GN=AMELX PE=1 SV=2	1	hf1_10472_ebo_30_1_261219.ScanId;v=1;d1=37236.37236.3	controllerType=0 controllerNumber=1 scan=37236	77.3521
45824:3	1	S.MP[+15.995]LPPHPGHPGYINF.S		P[+16]	563.949	3	1689.83	1689.82	0	6.3	17	Non	397.5	397.5	4	5.95	1703	>sp|P02817|AMELX_BOVIN Amelogenin, X isoform OS=Bos taurus OX=9913 GN=AMELX PE=1 SV=2	1	hf1_10472_ebo_30_1_261219.ScanId;v=1;d1=33184.33184.3	controllerType=0 controllerNumber=1 scan=33184	66.625
47969:3	1	S.MP[+15.995]LPPHPGHPGYINF.S		P[+16]	563.949	3	1689.83	1689.82	0	7.5	17	Non	403.44	403.44	4	5.86	1703	>sp|P02817|AMELX_BOVIN Amelogenin, X isoform OS=Bos taurus OX=9913 GN=AMELX PE=1 SV=2	1	hf1_10472_ebo_30_1_261219.ScanId;v=1;d1=34780.34780.3	controllerType=0 controllerNumber=1 scan=34780	70.0255
19821:3	1	S.M[+31.990]PLPPHPGHPGYINF.S		M[+32]	569.28	3	1705.83	1705.82	0	6.6	17	Non	403.93	403.93	9.53	5.86	1703	>sp|P02817|AMELX_BOVIN Amelogenin, X isoform OS=Bos taurus OX=9913 GN=AMELX PE=1 SV=2	1	hf1_10472_ebo_30_1_261219.ScanId;v=1;d1=15894.15894.3	controllerType=0 controllerNumber=1 scan=15894	35.6837
21262:2	1	S.M[+15.995]PLPPHPGHPGYINF.S		M[+16]	845.416	2	1689.82	1689.82	0	2.5	17	Non	405.09	338.14	25.57	4.64	1703	>sp|P02817|AMELX_BOVIN Amelogenin, X isoform OS=Bos taurus OX=9913 GN=AMELX PE=1 SV=2	1	hf1_10472_ebo_30_1_261219.ScanId;v=1;d1=16882.16882.2	controllerType=0 controllerNumber=1 scan=16882	37.3678
46199:2	1	S.M[+15.995]PLPPHPGHPGYINF.S		M[+16]	845.417	2	1689.83	1689.82	0	3.3	17	Non	405.8	356.39	37.42	4.64	1703	>sp|P02817|AMELX_BOVIN Amelogenin, X isoform OS=Bos taurus OX=9913 GN=AMELX PE=1 SV=2	1	hf1_10472_ebo_30_1_261219.ScanId;v=1;d1=33469.33469.3	controllerType=0 controllerNumber=1 scan=33469	67.2063
48939:2	1	S.M[+15.995]PLPPHPGHPGYINF.S		M[+16]	845.42	2	1689.83	1689.82	0	6.9	17	Non	406.84	406.84	23.65	6.14	1703	>sp|P02817|AMELX_BOVIN Amelogenin, X isoform OS=Bos taurus OX=9913 GN=AMELX PE=1 SV=2	1	hf1_10472_ebo_30_1_261219.ScanId;v=1;d1=35510.35510.2	controllerType=0 controllerNumber=1 scan=35510	71.6045
20611:3	1	S.MP[+15.995]LPPHPGHPGYINF.S		P[+16]	563.948	3	1689.83	1689.82	0	5	17	Non	409.95	409.95	5.8	5.93	1703	>sp|P02817|AMELX_BOVIN Amelogenin, X isoform OS=Bos taurus OX=9913 GN=AMELX PE=1 SV=2	1	hf1_10472_ebo_30_1_261219.ScanId;v=1;d1=16436.16436.3	controllerType=0 controllerNumber=1 scan=16436	36.5994
19453:3	1	S.M[+31.990]PLPPHPGHPGYINF.S		M[+32]	569.28	3	1705.83	1705.82	0	5.5	17	Non	413	413	8.44	6.07	1703	>sp|P02817|AMELX_BOVIN Amelogenin, X isoform OS=Bos taurus OX=9913 GN=AMELX PE=1 SV=2	1	hf1_10472_ebo_30_1_261219.ScanId;v=1;d1=15641.15641.3	controllerType=0 controllerNumber=1 scan=15641	35.2532
20304:2	1	S.M[+15.995]PLPPHPGHPGYINF.S		M[+16]	845.421	2	1689.83	1689.82	0	8	17	Non	415.02	404.12	19.56	6.14	1703	>sp|P02817|AMELX_BOVIN Amelogenin, X isoform OS=Bos taurus OX=9913 GN=AMELX PE=1 SV=2	1	hf1_10472_ebo_30_1_261219.ScanId;v=1;d1=16226.16226.2	controllerType=0 controllerNumber=1 scan=16226	36.2427
48415:3	1	S.MP[+15.995]LPPHPGHPGYINF.S		P[+16]	563.948	3	1689.83	1689.82	0	5.3	17	Non	416.99	416.99	4	5.93	1703	>sp|P02817|AMELX_BOVIN Amelogenin, X isoform OS=Bos taurus OX=9913 GN=AMELX PE=1 SV=2	1	hf1_10472_ebo_30_1_261219.ScanId;v=1;d1=35109.35109.3	controllerType=0 controllerNumber=1 scan=35109	70.716
46477:2	1	S.M[+15.995]PLPPHPGHPGYINF.S		M[+16]	845.418	2	1689.83	1689.82	0	4.5	17	Non	424.1	418.74	26.45	6.2	1703	>sp|P02817|AMELX_BOVIN Amelogenin, X isoform OS=Bos taurus OX=9913 GN=AMELX PE=1 SV=2	1	hf1_10472_ebo_30_1_261219.ScanId;v=1;d1=33689.33689.2	controllerType=0 controllerNumber=1 scan=33689	67.6818
22130:2	1	S.M[+15.995]PLPPHPGHPGYINF.S		M[+16]	845.417	2	1689.83	1689.82	0	3.5	17	Non	426.22	279.28	36	4.45	1703	>sp|P02817|AMELX_BOVIN Amelogenin, X isoform OS=Bos taurus OX=9913 GN=AMELX PE=1 SV=2	1	hf1_10472_ebo_30_1_261219.ScanId;v=1;d1=17457.17457.3	controllerType=0 controllerNumber=1 scan=17457	38.3507
19176:3	1	S.MP[+31.990]LPPHPGHPGYINF.S		P[+32]	569.28	3	1705.83	1705.82	0	5.5	17	Non	427.04	427.04	0	6.07	1703	>sp|P02817|AMELX_BOVIN Amelogenin, X isoform OS=Bos taurus OX=9913 GN=AMELX PE=1 SV=2	1	hf1_10472_ebo_30_1_261219.ScanId;v=1;d1=15445.15445.3	controllerType=0 controllerNumber=1 scan=15445	34.9065
47616:2	1	S.M[+15.995]PLPPHPGHPGYINF.S		M[+16]	845.419	2	1689.83	1689.82	0	6.2	17	Non	428.96	428.96	37.38	6.24	1703	>sp|P02817|AMELX_BOVIN Amelogenin, X isoform OS=Bos taurus OX=9913 GN=AMELX PE=1 SV=2	1	hf1_10472_ebo_30_1_261219.ScanId;v=1;d1=34516.34516.2	controllerType=0 controllerNumber=1 scan=34516	69.5038
46159:2	1	S.M[+15.995]PLPPHPGHPGYINF.S		M[+16]	845.421	2	1689.83	1689.82	0	8.2	17	Non	432.8	421.21	38.17	6.12	1703	>sp|P02817|AMELX_BOVIN Amelogenin, X isoform OS=Bos taurus OX=9913 GN=AMELX PE=1 SV=2	1	hf1_10472_ebo_30_1_261219.ScanId;v=1;d1=33437.33437.3	controllerType=0 controllerNumber=1 scan=33437	67.1389
47137:2	1	S.M[+15.995]PLPPHPGHPGYINF.S		M[+16]	845.42	2	1689.83	1689.82	0	6.9	17	Non	435.9	419.51	39.36	6.14	1703	>sp|P02817|AMELX_BOVIN Amelogenin, X isoform OS=Bos taurus OX=9913 GN=AMELX PE=1 SV=2	1	hf1_10472_ebo_30_1_261219.ScanId;v=1;d1=34175.34175.2	controllerType=0 controllerNumber=1 scan=34175	68.7796
46439:2	1	S.M[+15.995]PLPPHPGHPGYINF.S		M[+16]	845.418	2	1689.83	1689.82	0	5.3	17	Non	440.25	436.56	36.41	6.11	1703	>sp|P02817|AMELX_BOVIN Amelogenin, X isoform OS=Bos taurus OX=9913 GN=AMELX PE=1 SV=2	1	hf1_10472_ebo_30_1_261219.ScanId;v=1;d1=33659.33659.3	controllerType=0 controllerNumber=1 scan=33659	67.6147
22236:3	1	S.MPLPPHPGHPGYIN[+0.984]F.S		N[+1]	558.946	3	1674.82	1674.81	0	8.9	17	Non	459.46	459.46	459.46	5.48	1703	>sp|P02817|AMELX_BOVIN Amelogenin, X isoform OS=Bos taurus OX=9913 GN=AMELX PE=1 SV=2	1	hf1_10472_ebo_30_1_261219.ScanId;v=1;d1=17529.17529.3	controllerType=0 controllerNumber=1 scan=17529	38.4752
49645:2	1	S.M[+15.995]PLPPHPGHPGYINF.S		M[+16]	845.418	2	1689.83	1689.82	0	5.3	17	Non	461.89	448.69	49.15	6.13	1703	>sp|P02817|AMELX_BOVIN Amelogenin, X isoform OS=Bos taurus OX=9913 GN=AMELX PE=1 SV=2	1	hf1_10472_ebo_30_1_261219.ScanId;v=1;d1=36037.36037.2	controllerType=0 controllerNumber=1 scan=36037	72.7509
46662:2	1	S.M[+15.995]PLPPHPGHPGYINF.S		M[+16]	845.419	2	1689.83	1689.82	0	5.8	17	Non	464	429.66	36.8	6.13	1703	>sp|P02817|AMELX_BOVIN Amelogenin, X isoform OS=Bos taurus OX=9913 GN=AMELX PE=1 SV=2	1	hf1_10472_ebo_30_1_261219.ScanId;v=1;d1=33828.33828.3	controllerType=0 controllerNumber=1 scan=33828	68.0242
20637:2	1	S.M[+15.995]PLPPHPGHPGYINF.S		M[+16]	845.417	2	1689.83	1689.82	0	3.8	17	Non	474.35	394.47	20.27	5.5	1703	>sp|P02817|AMELX_BOVIN Amelogenin, X isoform OS=Bos taurus OX=9913 GN=AMELX PE=1 SV=2	1	hf1_10472_ebo_30_1_261219.ScanId;v=1;d1=16452.16452.2	controllerType=0 controllerNumber=1 scan=16452	36.6251
16979:2	1	S.M[+15.995]PLPPHPGHPGYINF.S		M[+16]	845.419	2	1689.83	1689.82	0	6.4	17	Non	478.17	419.71	56.08	6.06	1703	>sp|P02817|AMELX_BOVIN Amelogenin, X isoform OS=Bos taurus OX=9913 GN=AMELX PE=1 SV=2	1	hf1_10472_ebo_30_1_261219.ScanId;v=1;d1=13845.13845.2	controllerType=0 controllerNumber=1 scan=13845	32.0948
46671:2	1	S.M[+15.995]PLPPHPGHPGYINF.S		M[+16]	845.419	2	1689.83	1689.82	0	5.7	17	Non	489.61	413.28	43	6.43	1703	>sp|P02817|AMELX_BOVIN Amelogenin, X isoform OS=Bos taurus OX=9913 GN=AMELX PE=1 SV=2	1	hf1_10472_ebo_30_1_261219.ScanId;v=1;d1=33836.33836.2	controllerType=0 controllerNumber=1 scan=33836	68.0419
22881:2	1	S.MPLPPHPGHPGYIN[+0.984]F.S		N[+1]	837.915	2	1674.82	1674.81	0	7.8	17	Non	490.41	474.51	474.51	6.22	1703	>sp|P02817|AMELX_BOVIN Amelogenin, X isoform OS=Bos taurus OX=9913 GN=AMELX PE=1 SV=2	1	hf1_10472_ebo_30_1_261219.ScanId;v=1;d1=17953.17953.2	controllerType=0 controllerNumber=1 scan=17953	39.1941
20926:2	1	S.M[+15.995]PLPPHPGHPGYINF.S		M[+16]	845.419	2	1689.83	1689.82	0	5.8	17	Non	493.94	375.43	31.66	6.27	1703	>sp|P02817|AMELX_BOVIN Amelogenin, X isoform OS=Bos taurus OX=9913 GN=AMELX PE=1 SV=2	1	hf1_10472_ebo_30_1_261219.ScanId;v=1;d1=16652.16652.2	controllerType=0 controllerNumber=1 scan=16652	36.9721
18547:2	1	S.M[+31.990]PLPPHPGHPGYINF.S		M[+32]	853.416	2	1705.82	1705.82	0	5.3	17	Non	505.05	505.05	0	6.29	1703	>sp|P02817|AMELX_BOVIN Amelogenin, X isoform OS=Bos taurus OX=9913 GN=AMELX PE=1 SV=2	1	hf1_10472_ebo_30_1_261219.ScanId;v=1;d1=14995.14995.2	controllerType=0 controllerNumber=1 scan=14995	34.1337
16690:2	1	S.M[+15.995]PLPPHPGHPGYINF.S		M[+16]	845.421	2	1689.83	1689.82	0	8.2	17	Non	518.17	408.88	54.16	6.36	1703	>sp|P02817|AMELX_BOVIN Amelogenin, X isoform OS=Bos taurus OX=9913 GN=AMELX PE=1 SV=2	1	hf1_10472_ebo_30_1_261219.ScanId;v=1;d1=13640.13640.2	controllerType=0 controllerNumber=1 scan=13640	31.7415
23174:3	1	S.MPLPPHPGHPGYIN[+0.984]F.S		N[+1]	558.944	3	1674.82	1674.81	0	5	17	Non	526.48	526.48	526.48	6.26	1703	>sp|P02817|AMELX_BOVIN Amelogenin, X isoform OS=Bos taurus OX=9913 GN=AMELX PE=1 SV=2	1	hf1_10472_ebo_30_1_261219.ScanId;v=1;d1=18140.18140.3	controllerType=0 controllerNumber=1 scan=18140	39.5125
22858:3	1	S.MPLPPHPGHPGYIN[+0.984]F.S		N[+1]	558.945	3	1674.82	1674.81	0	6.4	17	Non	526.87	526.87	526.87	6.2	1703	>sp|P02817|AMELX_BOVIN Amelogenin, X isoform OS=Bos taurus OX=9913 GN=AMELX PE=1 SV=2	1	hf1_10472_ebo_30_1_261219.ScanId;v=1;d1=17938.17938.3	controllerType=0 controllerNumber=1 scan=17938	39.1702
22543:3	1	S.MPLPPHPGHPGYIN[+0.984]F.S		N[+1]	558.946	3	1674.82	1674.81	0	7.6	17	Non	547.28	547.28	547.28	6.8	1703	>sp|P02817|AMELX_BOVIN Amelogenin, X isoform OS=Bos taurus OX=9913 GN=AMELX PE=1 SV=2	1	hf1_10472_ebo_30_1_261219.ScanId;v=1;d1=17731.17731.3	controllerType=0 controllerNumber=1 scan=17731	38.8198
19390:2	1	S.M[+31.990]PLPPHPGHPGYINF.S		M[+32]	853.417	2	1705.83	1705.82	0	6.4	17	Non	566.35	566.35	0	7.25	1703	>sp|P02817|AMELX_BOVIN Amelogenin, X isoform OS=Bos taurus OX=9913 GN=AMELX PE=1 SV=2	1	hf1_10472_ebo_30_1_261219.ScanId;v=1;d1=15599.15599.2	controllerType=0 controllerNumber=1 scan=15599	35.1806
18819:2	1	S.MP[+31.990]LPPHPGHPGYINF.S		P[+32]	853.417	2	1705.83	1705.82	0	6	17	Non	577.19	577.19	0	7.32	1703	>sp|P02817|AMELX_BOVIN Amelogenin, X isoform OS=Bos taurus OX=9913 GN=AMELX PE=1 SV=2	1	hf1_10472_ebo_30_1_261219.ScanId;v=1;d1=15191.15191.2	controllerType=0 controllerNumber=1 scan=15191	34.4737
18024:2	1	S.M[+15.995]PLPPHPGHPGYINF.S		M[+16]	845.418	2	1689.83	1689.82	0	5.3	17	Non	584.99	529.6	56.64	7.32	1703	>sp|P02817|AMELX_BOVIN Amelogenin, X isoform OS=Bos taurus OX=9913 GN=AMELX PE=1 SV=2	1	hf1_10472_ebo_30_1_261219.ScanId;v=1;d1=14619.14619.2	controllerType=0 controllerNumber=1 scan=14619	33.4667
18290:2	1	S.M[+15.995]PLPPHPGHPGYINF.S		M[+16]	845.418	2	1689.83	1689.82	0	5.3	17	Non	594.13	553.77	58.71	7.22	1703	>sp|P02817|AMELX_BOVIN Amelogenin, X isoform OS=Bos taurus OX=9913 GN=AMELX PE=1 SV=2	1	hf1_10472_ebo_30_1_261219.ScanId;v=1;d1=14816.14816.2	controllerType=0 controllerNumber=1 scan=14816	33.8164
19116:2	1	S.M[+31.990]PLPPHPGHPGYINF.S		M[+32]	853.417	2	1705.83	1705.82	0	6.3	17	Non	594.97	594.97	0	7.25	1703	>sp|P02817|AMELX_BOVIN Amelogenin, X isoform OS=Bos taurus OX=9913 GN=AMELX PE=1 SV=2	1	hf1_10472_ebo_30_1_261219.ScanId;v=1;d1=15402.15402.2	controllerType=0 controllerNumber=1 scan=15402	34.8349
17234:2	1	S.M[+15.995]PLPPHPGHPGYINF.S		M[+16]	845.419	2	1689.83	1689.82	0	5.5	17	Non	597.78	496.52	53.49	7.32	1703	>sp|P02817|AMELX_BOVIN Amelogenin, X isoform OS=Bos taurus OX=9913 GN=AMELX PE=1 SV=2	1	hf1_10472_ebo_30_1_261219.ScanId;v=1;d1=14035.14035.2	controllerType=0 controllerNumber=1 scan=14035	32.4345
22560:2	1	S.MPLPPHPGHPGYIN[+0.984]F.S		N[+1]	837.916	2	1674.82	1674.81	0	8.7	17	Non	624.85	592.17	592.17	7.81	1703	>sp|P02817|AMELX_BOVIN Amelogenin, X isoform OS=Bos taurus OX=9913 GN=AMELX PE=1 SV=2	1	hf1_10472_ebo_30_1_261219.ScanId;v=1;d1=17742.17742.2	controllerType=0 controllerNumber=1 scan=17742	38.8385
21930:2	1	S.MPLPPHPGHPGYIN[+0.984]F.S		N[+1]	837.914	2	1674.82	1674.81	0	6.4	17	Non	633.99	593.86	593.86	8.15	1703	>sp|P02817|AMELX_BOVIN Amelogenin, X isoform OS=Bos taurus OX=9913 GN=AMELX PE=1 SV=2	1	hf1_10472_ebo_30_1_261219.ScanId;v=1;d1=17330.17330.2	controllerType=0 controllerNumber=1 scan=17330	38.14
22255:2	1	S.MPLPPHPGHPGYIN[+0.984]F.S		N[+1]	837.915	2	1674.82	1674.81	0	7.7	17	Non	641.15	608.64	608.64	8.15	1703	>sp|P02817|AMELX_BOVIN Amelogenin, X isoform OS=Bos taurus OX=9913 GN=AMELX PE=1 SV=2	1	hf1_10472_ebo_30_1_261219.ScanId;v=1;d1=17541.17541.2	controllerType=0 controllerNumber=1 scan=17541	38.4951
17490:2	1	S.M[+15.995]PLPPHPGHPGYINF.S		M[+16]	845.418	2	1689.83	1689.82	0	5.4	17	Non	651.74	570.54	84.72	9.22	1703	>sp|P02817|AMELX_BOVIN Amelogenin, X isoform OS=Bos taurus OX=9913 GN=AMELX PE=1 SV=2	1	hf1_10472_ebo_30_1_261219.ScanId;v=1;d1=14222.14222.2	controllerType=0 controllerNumber=1 scan=14222	32.7701
17754:2	1	S.M[+15.995]PLPPHPGHPGYINF.S		M[+16]	845.419	2	1689.83	1689.82	0	5.5	17	Non	653.52	565.81	75.38	9.92	1703	>sp|P02817|AMELX_BOVIN Amelogenin, X isoform OS=Bos taurus OX=9913 GN=AMELX PE=1 SV=2	1	hf1_10472_ebo_30_1_261219.ScanId;v=1;d1=14421.14421.2	controllerType=0 controllerNumber=1 scan=14421	33.1192
46155:3	1	S.MP[+15.995]LPPH[+15.995]PGHPGYINF.S		H[+16], P[+16]	569.28	3	1705.82	1705.82	0	5.2	17	Non	120.4	120.4	0	1.45	1703	>sp|P02817|AMELX_BOVIN Amelogenin, X isoform OS=Bos taurus OX=9913 GN=AMELX PE=1 SV=2	1	hf1_10472_ebo_30_1_261219.ScanId;v=1;d1=33435.33435.3	controllerType=0 controllerNumber=1 scan=33435	67.1359
17276:3	1	S.M[+31.990]PLPPHPGHPGYIN[+0.984]F.S		M[+32], N[+1]	569.608	3	1706.81	1706.8	0	5.5	17	Non	132.14	132.14	0	1.45	1703	>sp|P02817|AMELX_BOVIN Amelogenin, X isoform OS=Bos taurus OX=9913 GN=AMELX PE=1 SV=2	1	hf1_10472_ebo_30_1_261219.ScanId;v=1;d1=14064.14064.3	controllerType=0 controllerNumber=1 scan=14064	32.4869
17542:3	1	S.M[+31.990]PLPPHPGHPGYIN[+0.984]F.S		M[+32], N[+1]	569.608	3	1706.81	1706.8	0	5.4	17	Non	157.22	157.22	0	1.45	1703	>sp|P02817|AMELX_BOVIN Amelogenin, X isoform OS=Bos taurus OX=9913 GN=AMELX PE=1 SV=2	1	hf1_10472_ebo_30_1_261219.ScanId;v=1;d1=14260.14260.3	controllerType=0 controllerNumber=1 scan=14260	32.8363
16964:3	1	S.MP[+15.995]LPPHP[+31.990]GHPGYINF.S		P[+16][+32]	574.611	3	1721.82	1721.81	0	5	17	Non	167.72	167.72	5.8	1.42	1703	>sp|P02817|AMELX_BOVIN Amelogenin, X isoform OS=Bos taurus OX=9913 GN=AMELX PE=1 SV=2	1	hf1_10472_ebo_30_1_261219.ScanId;v=1;d1=13836.13836.3	controllerType=0 controllerNumber=1 scan=13836	32.079
22485:3	1	S.MP[+15.995]LPPHP[+15.995]GHPGYINF.S		P[+16]*2	569.28	3	1705.83	1705.82	0	6.3	17	Non	169.02	169.02	4	1.38	1703	>sp|P02817|AMELX_BOVIN Amelogenin, X isoform OS=Bos taurus OX=9913 GN=AMELX PE=1 SV=2	1	hf1_10472_ebo_30_1_261219.ScanId;v=1;d1=17690.17690.3	controllerType=0 controllerNumber=1 scan=17690	38.7453
17621:3	1	S.MP[+31.990]LPP[+15.995]HPGHPGYINF.S		P[+16][+32]	574.612	3	1721.82	1721.81	0	6.1	17	Non	194.43	194.43	0	1.42	1703	>sp|P02817|AMELX_BOVIN Amelogenin, X isoform OS=Bos taurus OX=9913 GN=AMELX PE=1 SV=2	1	hf1_10472_ebo_30_1_261219.ScanId;v=1;d1=14321.14321.3	controllerType=0 controllerNumber=1 scan=14321	32.9406
16687:3	1	S.MP[+31.990]LPPHPGH[+15.995]PGYINF.S		H[+16], P[+32]	574.611	3	1721.82	1721.81	0	4.2	17	Non	210.04	210.04	0	2.54	1703	>sp|P02817|AMELX_BOVIN Amelogenin, X isoform OS=Bos taurus OX=9913 GN=AMELX PE=1 SV=2	1	hf1_10472_ebo_30_1_261219.ScanId;v=1;d1=13638.13638.3	controllerType=0 controllerNumber=1 scan=13638	31.7358
21707:2	1	S.MP[+15.995]LPPHP[+15.995]GHPGYINF.S		P[+16]*2	853.418	2	1705.83	1705.82	0	7.1	17	Non	214.33	214.33	4	2.68	1703	>sp|P02817|AMELX_BOVIN Amelogenin, X isoform OS=Bos taurus OX=9913 GN=AMELX PE=1 SV=2	1	hf1_10472_ebo_30_1_261219.ScanId;v=1;d1=17181.17181.2	controllerType=0 controllerNumber=1 scan=17181	37.876
15625:3	1	S.M[+15.995]PLP[+31.990]PHPGHPGYINF.S		M[+16], P[+32]	574.611	3	1721.82	1721.81	0	3.9	17	Non	234.21	234.21	9.99	2.3	1703	>sp|P02817|AMELX_BOVIN Amelogenin, X isoform OS=Bos taurus OX=9913 GN=AMELX PE=1 SV=2	1	hf1_10472_ebo_30_1_261219.ScanId;v=1;d1=12870.12870.3	controllerType=0 controllerNumber=1 scan=12870	30.3883
15645:3	1	S.MP[+15.995]LPPHPGHP[+15.995]GYINF.S		P[+16]*2	569.282	3	1705.83	1705.82	0	8.9	17	Non	239.71	239.71	4	2.69	1703	>sp|P02817|AMELX_BOVIN Amelogenin, X isoform OS=Bos taurus OX=9913 GN=AMELX PE=1 SV=2	1	hf1_10472_ebo_30_1_261219.ScanId;v=1;d1=12884.12884.3	controllerType=0 controllerNumber=1 scan=12884	30.4135
13966:3	1	S.MP[+15.995]LPPHPGHPGYINF[+15.995].S		F[+16], P[+16]	569.277	3	1705.82	1705.82	0	0.5	17	Non	259.13	259.13	3.69	3.69	1703	>sp|P02817|AMELX_BOVIN Amelogenin, X isoform OS=Bos taurus OX=9913 GN=AMELX PE=1 SV=2	1	hf1_10472_ebo_30_1_261219.ScanId;v=1;d1=11713.11713.3	controllerType=0 controllerNumber=1 scan=11713	28.4912
18799:2	1	S.M[+15.995]PLPPHPGHPGYIN[+0.984]F.S		M[+16], N[+1]	845.911	2	1690.82	1690.8	0	6.1	17	Non	272.42	266.38	20.46	4.82	1703	>sp|P02817|AMELX_BOVIN Amelogenin, X isoform OS=Bos taurus OX=9913 GN=AMELX PE=1 SV=2	1	hf1_10472_ebo_30_1_261219.ScanId;v=1;d1=15175.15175.2	controllerType=0 controllerNumber=1 scan=15175	34.4457
20927:2	1	S.MPLPPHP[+15.995]GHPGYIN[+0.984]F.S		N[+1], P[+16]	845.912	2	1690.82	1690.8	0	6.9	17	Non	272.91	260.49	20.28	3.96	1703	>sp|P02817|AMELX_BOVIN Amelogenin, X isoform OS=Bos taurus OX=9913 GN=AMELX PE=1 SV=2	1	hf1_10472_ebo_30_1_261219.ScanId;v=1;d1=16652.16652.2	controllerType=0 controllerNumber=1 scan=16652	36.9721
15921:3	1	S.MP[+15.995]LPPHPGHP[+15.995]GYINF.S		P[+16]*2	569.278	3	1705.82	1705.82	0	1.7	17	Non	278.2	278.2	4	3.69	1703	>sp|P02817|AMELX_BOVIN Amelogenin, X isoform OS=Bos taurus OX=9913 GN=AMELX PE=1 SV=2	1	hf1_10472_ebo_30_1_261219.ScanId;v=1;d1=13083.13083.3	controllerType=0 controllerNumber=1 scan=13083	30.7586
17020:3	1	S.MP[+15.995]LPPHPGHP[+15.995]GYINF.S		P[+16]*2	569.28	3	1705.83	1705.82	0	5.7	17	Non	300.24	300.24	4	4.76	1703	>sp|P02817|AMELX_BOVIN Amelogenin, X isoform OS=Bos taurus OX=9913 GN=AMELX PE=1 SV=2	1	hf1_10472_ebo_30_1_261219.ScanId;v=1;d1=13872.13872.3	controllerType=0 controllerNumber=1 scan=13872	32.1425
16204:3	1	S.MP[+15.995]LPPHPGHP[+15.995]GYINF.S		P[+16]*2	569.279	3	1705.82	1705.82	0	3.3	17	Non	307.95	307.95	1.04	4.15	1703	>sp|P02817|AMELX_BOVIN Amelogenin, X isoform OS=Bos taurus OX=9913 GN=AMELX PE=1 SV=2	1	hf1_10472_ebo_30_1_261219.ScanId;v=1;d1=13285.13285.3	controllerType=0 controllerNumber=1 scan=13285	31.1128
16466:3	1	S.MP[+15.995]LPPHPGHP[+15.995]GYINF.S		P[+16]*2	569.279	3	1705.82	1705.82	0	3.8	17	Non	309.69	309.69	4	4.15	1703	>sp|P02817|AMELX_BOVIN Amelogenin, X isoform OS=Bos taurus OX=9913 GN=AMELX PE=1 SV=2	1	hf1_10472_ebo_30_1_261219.ScanId;v=1;d1=13477.13477.3	controllerType=0 controllerNumber=1 scan=13477	31.4518
16731:3	1	S.MP[+15.995]LPPHPGHP[+15.995]GYINF.S		P[+16]*2	569.279	3	1705.82	1705.82	0	4	17	Non	322.1	322.1	4	4.31	1703	>sp|P02817|AMELX_BOVIN Amelogenin, X isoform OS=Bos taurus OX=9913 GN=AMELX PE=1 SV=2	1	hf1_10472_ebo_30_1_261219.ScanId;v=1;d1=13671.13671.3	controllerType=0 controllerNumber=1 scan=13671	31.7943
19991:3	1	S.MP[+15.995]LPPHPGHPGYIN[+0.984]F.S		N[+1], P[+16]	564.275	3	1690.81	1690.8	0	3.4	17	Non	346.34	346.34	5.8	4.31	1703	>sp|P02817|AMELX_BOVIN Amelogenin, X isoform OS=Bos taurus OX=9913 GN=AMELX PE=1 SV=2	1	hf1_10472_ebo_30_1_261219.ScanId;v=1;d1=16010.16010.3	controllerType=0 controllerNumber=1 scan=16010	35.8787
19739:2	1	S.M[+15.995]PLPPHPGHPGYIN[+0.984]F.S		M[+16], N[+1]	845.911	2	1690.81	1690.8	0	6.1	17	Non	347.02	326.05	3.24	5.2	1703	>sp|P02817|AMELX_BOVIN Amelogenin, X isoform OS=Bos taurus OX=9913 GN=AMELX PE=1 SV=2	1	hf1_10472_ebo_30_1_261219.ScanId;v=1;d1=15841.15841.2	controllerType=0 controllerNumber=1 scan=15841	35.5951
20722:3	1	S.M[+31.990]PLPPHPGHPGYIN[+0.984]F.S		M[+32], N[+1]	569.607	3	1706.81	1706.8	0	4	17	Non	351.69	306.9	8.53	4.25	1703	>sp|P02817|AMELX_BOVIN Amelogenin, X isoform OS=Bos taurus OX=9913 GN=AMELX PE=1 SV=2	1	hf1_10472_ebo_30_1_261219.ScanId;v=1;d1=16509.16509.3	controllerType=0 controllerNumber=1 scan=16509	36.73
21228:2	1	S.M[+15.995]PLP[+15.995]PHPGHPGYINF.S		M[+16], P[+16]	853.418	2	1705.83	1705.82	0	7.3	17	Non	355.42	355.42	6.61	5.14	1703	>sp|P02817|AMELX_BOVIN Amelogenin, X isoform OS=Bos taurus OX=9913 GN=AMELX PE=1 SV=2	1	hf1_10472_ebo_30_1_261219.ScanId;v=1;d1=16861.16861.2	controllerType=0 controllerNumber=1 scan=16861	37.3342
20419:3	1	S.M[+31.990]PLPPHPGHPGYIN[+0.984]F.S		M[+32], N[+1]	569.608	3	1706.81	1706.8	0	5.2	17	Non	360.35	334.74	8.37	4.93	1703	>sp|P02817|AMELX_BOVIN Amelogenin, X isoform OS=Bos taurus OX=9913 GN=AMELX PE=1 SV=2	1	hf1_10472_ebo_30_1_261219.ScanId;v=1;d1=16305.16305.3	controllerType=0 controllerNumber=1 scan=16305	36.3789
18790:3	1	S.MP[+15.995]LPPHPGHPGYIN[+0.984]F.S		N[+1], P[+16]	564.279	3	1690.82	1690.8	0	9.8	17	Non	369.23	369.23	4	5.61	1703	>sp|P02817|AMELX_BOVIN Amelogenin, X isoform OS=Bos taurus OX=9913 GN=AMELX PE=1 SV=2	1	hf1_10472_ebo_30_1_261219.ScanId;v=1;d1=15169.15169.3	controllerType=0 controllerNumber=1 scan=15169	34.4407
20063:2	1	S.M[+31.990]PLPPHPGHPGYIN[+0.984]F.S		M[+32], N[+1]	853.908	2	1706.81	1706.8	0	5	17	Non	374.07	347.82	0	5.03	1703	>sp|P02817|AMELX_BOVIN Amelogenin, X isoform OS=Bos taurus OX=9913 GN=AMELX PE=1 SV=2	1	hf1_10472_ebo_30_1_261219.ScanId;v=1;d1=16058.16058.2	controllerType=0 controllerNumber=1 scan=16058	35.9568
19402:3	1	S.MP[+15.995]LPPHPGHPGYIN[+0.984]F.S		N[+1], P[+16]	564.278	3	1690.82	1690.8	0	7.9	17	Non	377.57	377.57	4	5.95	1703	>sp|P02817|AMELX_BOVIN Amelogenin, X isoform OS=Bos taurus OX=9913 GN=AMELX PE=1 SV=2	1	hf1_10472_ebo_30_1_261219.ScanId;v=1;d1=15607.15607.3	controllerType=0 controllerNumber=1 scan=15607	35.1931
19080:3	1	S.MP[+15.995]LPPHPGHPGYIN[+0.984]F.S		N[+1], P[+16]	564.278	3	1690.82	1690.8	0	9	17	Non	400.26	400.26	4	5.66	1703	>sp|P02817|AMELX_BOVIN Amelogenin, X isoform OS=Bos taurus OX=9913 GN=AMELX PE=1 SV=2	1	hf1_10472_ebo_30_1_261219.ScanId;v=1;d1=15376.15376.3	controllerType=0 controllerNumber=1 scan=15376	34.7911
20121:3	1	S.M[+31.990]PLPPHPGHPGYIN[+0.984]F.S		M[+32], N[+1]	569.607	3	1706.81	1706.8	0	4.3	17	Non	400.95	366.56	8.38	5.93	1703	>sp|P02817|AMELX_BOVIN Amelogenin, X isoform OS=Bos taurus OX=9913 GN=AMELX PE=1 SV=2	1	hf1_10472_ebo_30_1_261219.ScanId;v=1;d1=16098.16098.3	controllerType=0 controllerNumber=1 scan=16098	36.027
19687:3	1	S.MP[+15.995]LPPHPGHPGYIN[+0.984]F.S		N[+1], P[+16]	564.277	3	1690.82	1690.8	0	6.8	17	Non	406.71	406.71	4	6	1703	>sp|P02817|AMELX_BOVIN Amelogenin, X isoform OS=Bos taurus OX=9913 GN=AMELX PE=1 SV=2	1	hf1_10472_ebo_30_1_261219.ScanId;v=1;d1=15803.15803.3	controllerType=0 controllerNumber=1 scan=15803	35.5352
19738:2	1	S.M[+31.990]PLPPHPGHPGYIN[+0.984]F.S		M[+32], N[+1]	853.91	2	1706.81	1706.8	0	7.3	17	Non	408.77	408.77	0	6.14	1703	>sp|P02817|AMELX_BOVIN Amelogenin, X isoform OS=Bos taurus OX=9913 GN=AMELX PE=1 SV=2	1	hf1_10472_ebo_30_1_261219.ScanId;v=1;d1=15840.15840.2	controllerType=0 controllerNumber=1 scan=15840	35.5936
19822:3	1	S.M[+31.990]PLPPHPGHPGYIN[+0.984]F.S		M[+32], N[+1]	569.607	3	1706.81	1706.8	0	4.9	17	Non	450.13	418.61	9.53	5.89	1703	>sp|P02817|AMELX_BOVIN Amelogenin, X isoform OS=Bos taurus OX=9913 GN=AMELX PE=1 SV=2	1	hf1_10472_ebo_30_1_261219.ScanId;v=1;d1=15894.15894.3	controllerType=0 controllerNumber=1 scan=15894	35.6837
20305:2	1	S.M[+15.995]PLPPHPGHPGYIN[+0.984]F.S		M[+16], N[+1]	845.913	2	1690.82	1690.8	0	7.7	17	Non	459.3	432.77	44.9	6.05	1703	>sp|P02817|AMELX_BOVIN Amelogenin, X isoform OS=Bos taurus OX=9913 GN=AMELX PE=1 SV=2	1	hf1_10472_ebo_30_1_261219.ScanId;v=1;d1=16226.16226.2	controllerType=0 controllerNumber=1 scan=16226	36.2427
16981:2	1	S.M[+15.995]PLPPHPGHP[+15.995]GYINF.S		M[+16], P[+16]	853.417	2	1705.83	1705.82	0	6.8	17	Non	498.04	498.04	0.7	6.22	1703	>sp|P02817|AMELX_BOVIN Amelogenin, X isoform OS=Bos taurus OX=9913 GN=AMELX PE=1 SV=2	1	hf1_10472_ebo_30_1_261219.ScanId;v=1;d1=13846.13846.2	controllerType=0 controllerNumber=1 scan=13846	32.0954
17792:2	1	S.M[+15.995]PLP[+15.995]PHPGHPGYINF.S		M[+16], P[+16]	853.415	2	1705.82	1705.82	0	4.8	17	Non	498.75	498.75	13.29	6.27	1703	>sp|P02817|AMELX_BOVIN Amelogenin, X isoform OS=Bos taurus OX=9913 GN=AMELX PE=1 SV=2	1	hf1_10472_ebo_30_1_261219.ScanId;v=1;d1=14450.14450.2	controllerType=0 controllerNumber=1 scan=14450	33.1709
18291:2	1	S.M[+15.995]PLPPHPGHPGYIN[+0.984]F.S		M[+16], N[+1]	845.912	2	1690.82	1690.8	0	7.4	17	Non	499.94	482.8	44.85	6.36	1703	>sp|P02817|AMELX_BOVIN Amelogenin, X isoform OS=Bos taurus OX=9913 GN=AMELX PE=1 SV=2	1	hf1_10472_ebo_30_1_261219.ScanId;v=1;d1=14816.14816.2	controllerType=0 controllerNumber=1 scan=14816	33.8164
18076:2	1	S.M[+15.995]P[+15.995]LPPHPGHPGYINF.S		M[+16], P[+16]	853.415	2	1705.82	1705.82	0	4.7	17	Non	524.97	524.97	0.63	6.38	1703	>sp|P02817|AMELX_BOVIN Amelogenin, X isoform OS=Bos taurus OX=9913 GN=AMELX PE=1 SV=2	1	hf1_10472_ebo_30_1_261219.ScanId;v=1;d1=14655.14655.2	controllerType=0 controllerNumber=1 scan=14655	33.5293
18562:2	1	S.M[+15.995]PLPPHPGHPGYIN[+0.984]F.S		M[+16], N[+1]	845.912	2	1690.82	1690.8	0	6.6	17	Non	526.34	513.68	56.71	6.47	1703	>sp|P02817|AMELX_BOVIN Amelogenin, X isoform OS=Bos taurus OX=9913 GN=AMELX PE=1 SV=2	1	hf1_10472_ebo_30_1_261219.ScanId;v=1;d1=15007.15007.2	controllerType=0 controllerNumber=1 scan=15007	34.1542
15883:2	1	S.M[+15.995]PLPPHPGHPGY[+15.995]INF.S		M[+16], Y[+16]	853.414	2	1705.82	1705.82	0	2.6	17	Non	526.5	526.5	0	5.78	1703	>sp|P02817|AMELX_BOVIN Amelogenin, X isoform OS=Bos taurus OX=9913 GN=AMELX PE=1 SV=2	1	hf1_10472_ebo_30_1_261219.ScanId;v=1;d1=13056.13056.2	controllerType=0 controllerNumber=1 scan=13056	30.7149
19992:2	1	S.M[+15.995]PLPPHPGHPGYIN[+0.984]F.S		M[+16], N[+1]	845.909	2	1690.81	1690.8	0	3.5	17	Non	553.62	512.11	58.01	5.92	1703	>sp|P02817|AMELX_BOVIN Amelogenin, X isoform OS=Bos taurus OX=9913 GN=AMELX PE=1 SV=2	1	hf1_10472_ebo_30_1_261219.ScanId;v=1;d1=16011.16011.2	controllerType=0 controllerNumber=1 scan=16011	35.8796
16155:2	1	S.M[+15.995]PLPPHPGHP[+15.995]GYINF.S		M[+16], P[+16]	853.415	2	1705.82	1705.82	0	4.8	17	Non	561.45	561.45	7.42	7.17	1703	>sp|P02817|AMELX_BOVIN Amelogenin, X isoform OS=Bos taurus OX=9913 GN=AMELX PE=1 SV=2	1	hf1_10472_ebo_30_1_261219.ScanId;v=1;d1=13252.13252.2	controllerType=0 controllerNumber=1 scan=13252	31.0579
19395:2	1	S.M[+15.995]PLPPHPGHPGYIN[+0.984]F.S		M[+16], N[+1]	845.911	2	1690.81	1690.8	0	5.6	17	Non	562.69	539.82	61.21	7.32	1703	>sp|P02817|AMELX_BOVIN Amelogenin, X isoform OS=Bos taurus OX=9913 GN=AMELX PE=1 SV=2	1	hf1_10472_ebo_30_1_261219.ScanId;v=1;d1=15603.15603.2	controllerType=0 controllerNumber=1 scan=15603	35.1887
18842:2	1	S.M[+15.995]PLPPHPGHPGYIN[+0.984]F.S		M[+16], N[+1]	845.911	2	1690.82	1690.8	0	6.3	17	Non	563.72	541.19	59.9	7.25	1703	>sp|P02817|AMELX_BOVIN Amelogenin, X isoform OS=Bos taurus OX=9913 GN=AMELX PE=1 SV=2	1	hf1_10472_ebo_30_1_261219.ScanId;v=1;d1=15207.15207.2	controllerType=0 controllerNumber=1 scan=15207	34.5033
19131:2	1	S.M[+15.995]PLPPHPGHPGYIN[+0.984]F.S		M[+16], N[+1]	845.911	2	1690.81	1690.8	0	5.6	17	Non	568.52	536.64	65.39	7.32	1703	>sp|P02817|AMELX_BOVIN Amelogenin, X isoform OS=Bos taurus OX=9913 GN=AMELX PE=1 SV=2	1	hf1_10472_ebo_30_1_261219.ScanId;v=1;d1=15412.15412.2	controllerType=0 controllerNumber=1 scan=15412	34.8521
19688:2	1	S.M[+15.995]PLPPHPGHPGYIN[+0.984]F.S		M[+16], N[+1]	845.91	2	1690.81	1690.8	0	5.4	17	Non	570.91	542.28	72.69	7.32	1703	>sp|P02817|AMELX_BOVIN Amelogenin, X isoform OS=Bos taurus OX=9913 GN=AMELX PE=1 SV=2	1	hf1_10472_ebo_30_1_261219.ScanId;v=1;d1=15804.15804.2	controllerType=0 controllerNumber=1 scan=15804	35.5359
16691:2	1	S.M[+15.995]PLPPHPGHPGY[+15.995]INF.S		M[+16], Y[+16]	853.415	2	1705.82	1705.82	0	4.8	17	Non	581.34	581.34	0	7.32	1703	>sp|P02817|AMELX_BOVIN Amelogenin, X isoform OS=Bos taurus OX=9913 GN=AMELX PE=1 SV=2	1	hf1_10472_ebo_30_1_261219.ScanId;v=1;d1=13641.13641.2	controllerType=0 controllerNumber=1 scan=13641	31.7422
16429:2	1	S.M[+15.995]PLPPHPGHP[+15.995]GYINF.S		M[+16], P[+16]	853.416	2	1705.83	1705.82	0	5.6	17	Non	610.76	610.76	13.77	8.32	1703	>sp|P02817|AMELX_BOVIN Amelogenin, X isoform OS=Bos taurus OX=9913 GN=AMELX PE=1 SV=2	1	hf1_10472_ebo_30_1_261219.ScanId;v=1;d1=13449.13449.2	controllerType=0 controllerNumber=1 scan=13449	31.4005
21813:3	1	S.MPLPPHPGHPGYINFS[+79.966].Y		S[+80]	614.285	3	1840.84	1840.82	0	8.5	17	Non	161.64	161.64	147.82	2.5	1703	>sp|P02817|AMELX_BOVIN Amelogenin, X isoform OS=Bos taurus OX=9913 GN=AMELX PE=1 SV=2	1	hf1_10472_ebo_30_1_261219.ScanId;v=1;d1=17257.17257.3	controllerType=0 controllerNumber=1 scan=17257	38.0106
50170:3	1	S.MP[+15.995]LPPHPGHPGYINFS.Y		P[+16]	592.959	3	1776.86	1776.85	0	5.4	17	Non	210.57	110.59	4	1.3	1703	>sp|P02817|AMELX_BOVIN Amelogenin, X isoform OS=Bos taurus OX=9913 GN=AMELX PE=1 SV=2	1	hf1_10472_ebo_30_1_261219.ScanId;v=1;d1=36415.36415.3	controllerType=0 controllerNumber=1 scan=36415	73.5286
17514:3	1	S.MP[+15.995]LPPHPGHPGYINFS.Y		P[+16]	592.959	3	1776.86	1776.85	0	6.1	17	Non	220.27	92.1	4	1.96	1703	>sp|P02817|AMELX_BOVIN Amelogenin, X isoform OS=Bos taurus OX=9913 GN=AMELX PE=1 SV=2	1	hf1_10472_ebo_30_1_261219.ScanId;v=1;d1=14241.14241.3	controllerType=0 controllerNumber=1 scan=14241	32.8
18065:3	1	S.MP[+15.995]LPPHPGHPGYINFS.Y		P[+16]	592.957	3	1776.86	1776.85	0	2.7	17	Non	233.34	10.71	4	0.76	1703	>sp|P02817|AMELX_BOVIN Amelogenin, X isoform OS=Bos taurus OX=9913 GN=AMELX PE=1 SV=2	1	hf1_10472_ebo_30_1_261219.ScanId;v=1;d1=14647.14647.3	controllerType=0 controllerNumber=1 scan=14647	33.5155
22003:2	1	S.MPLPPHPGHPGYINFS[+79.966].Y		S[+80]	920.923	2	1840.84	1840.82	0	8	17	Non	238.67	238.67	134.42	2.69	1703	>sp|P02817|AMELX_BOVIN Amelogenin, X isoform OS=Bos taurus OX=9913 GN=AMELX PE=1 SV=2	1	hf1_10472_ebo_30_1_261219.ScanId;v=1;d1=17377.17377.3	controllerType=0 controllerNumber=1 scan=17377	38.2164
17249:3	1	S.MP[+15.995]LPPHPGHPGYINFS.Y		P[+16]	592.959	3	1776.86	1776.85	0	6	17	Non	250.05	247.58	4	4.57	1703	>sp|P02817|AMELX_BOVIN Amelogenin, X isoform OS=Bos taurus OX=9913 GN=AMELX PE=1 SV=2	1	hf1_10472_ebo_30_1_261219.ScanId;v=1;d1=14044.14044.3	controllerType=0 controllerNumber=1 scan=14044	32.4487
16850:3	1	S.MP[+15.995]LPPHPGHPGYINFS.Y		P[+16]	592.959	3	1776.86	1776.85	0	5.1	17	Non	257.6	257.6	4	4.4	1703	>sp|P02817|AMELX_BOVIN Amelogenin, X isoform OS=Bos taurus OX=9913 GN=AMELX PE=1 SV=2	1	hf1_10472_ebo_30_1_261219.ScanId;v=1;d1=13758.13758.3	controllerType=0 controllerNumber=1 scan=13758	31.9441
17478:2	1	S.M[+15.995]PLPPHPGHPGYINFS.Y		M[+16]	888.937	2	1776.87	1776.85	0	7.3	17	Non	275.25	0.76	0.76	2.72	1703	>sp|P02817|AMELX_BOVIN Amelogenin, X isoform OS=Bos taurus OX=9913 GN=AMELX PE=1 SV=2	1	hf1_10472_ebo_30_1_261219.ScanId;v=1;d1=14211.14211.2	controllerType=0 controllerNumber=1 scan=14211	32.7488
17202:2	1	S.M[+15.995]PLPPHPGHPGYINFS.Y		M[+16]	888.934	2	1776.86	1776.85	0	4.8	17	Non	278.17	84.2	8.56	2.96	1703	>sp|P02817|AMELX_BOVIN Amelogenin, X isoform OS=Bos taurus OX=9913 GN=AMELX PE=1 SV=2	1	hf1_10472_ebo_30_1_261219.ScanId;v=1;d1=14012.14012.2	controllerType=0 controllerNumber=1 scan=14012	32.3892
23192:3	1	S.MPLPPHPGHPGYINFS[+79.966].Y		S[+80]	614.284	3	1840.84	1840.82	0	7.1	17	Non	292.29	292.29	183.6	4.72	1703	>sp|P02817|AMELX_BOVIN Amelogenin, X isoform OS=Bos taurus OX=9913 GN=AMELX PE=1 SV=2	1	hf1_10472_ebo_30_1_261219.ScanId;v=1;d1=18152.18152.3	controllerType=0 controllerNumber=1 scan=18152	39.5321
16318:3	1	S.MP[+15.995]LPPHPGHPGYINFS.Y		P[+16]	592.958	3	1776.86	1776.85	0	4.6	17	Non	300.13	227.05	4	4.46	1703	>sp|P02817|AMELX_BOVIN Amelogenin, X isoform OS=Bos taurus OX=9913 GN=AMELX PE=1 SV=2	1	hf1_10472_ebo_30_1_261219.ScanId;v=1;d1=13364.13364.3	controllerType=0 controllerNumber=1 scan=13364	31.2472
16029:3	1	S.MP[+15.995]LPPHPGHPGYINFS.Y		P[+16]	592.958	3	1776.86	1776.85	0	3.4	17	Non	308.19	238.43	4	3.85	1703	>sp|P02817|AMELX_BOVIN Amelogenin, X isoform OS=Bos taurus OX=9913 GN=AMELX PE=1 SV=2	1	hf1_10472_ebo_30_1_261219.ScanId;v=1;d1=13159.13159.3	controllerType=0 controllerNumber=1 scan=13159	30.8878
16572:3	1	S.MP[+15.995]LPPHPGHPGYINFS.Y		P[+16]	592.959	3	1776.86	1776.85	0	4.9	17	Non	331.64	279.4	4	4.78	1703	>sp|P02817|AMELX_BOVIN Amelogenin, X isoform OS=Bos taurus OX=9913 GN=AMELX PE=1 SV=2	1	hf1_10472_ebo_30_1_261219.ScanId;v=1;d1=13554.13554.3	controllerType=0 controllerNumber=1 scan=13554	31.5905
21936:3	1	S.MPLPPHPGHPGYINFS[+79.966].Y		S[+80]	614.284	3	1840.84	1840.82	0	7.9	17	Non	363.28	305.63	233.98	4.83	1703	>sp|P02817|AMELX_BOVIN Amelogenin, X isoform OS=Bos taurus OX=9913 GN=AMELX PE=1 SV=2	1	hf1_10472_ebo_30_1_261219.ScanId;v=1;d1=17334.17334.3	controllerType=0 controllerNumber=1 scan=17334	38.1451
16927:2	1	S.M[+15.995]PLPPHPGHPGYINFS.Y		M[+16]	888.935	2	1776.86	1776.85	0	5.7	17	Non	370.46	186.96	7.47	4.5	1703	>sp|P02817|AMELX_BOVIN Amelogenin, X isoform OS=Bos taurus OX=9913 GN=AMELX PE=1 SV=2	1	hf1_10472_ebo_30_1_261219.ScanId;v=1;d1=13812.13812.2	controllerType=0 controllerNumber=1 scan=13812	32.0402
22875:3	1	S.MPLPPHPGHPGYINFS[+79.966].Y		S[+80]	614.284	3	1840.84	1840.82	0	7.8	17	Non	421.13	421.13	276.81	5.88	1703	>sp|P02817|AMELX_BOVIN Amelogenin, X isoform OS=Bos taurus OX=9913 GN=AMELX PE=1 SV=2	1	hf1_10472_ebo_30_1_261219.ScanId;v=1;d1=17949.17949.3	controllerType=0 controllerNumber=1 scan=17949	39.1882
22559:3	1	S.MPLPPHPGHPGYINFS[+79.966].Y		S[+80]	614.284	3	1840.84	1840.82	0	7.6	17	Non	451.05	379.02	259.53	5.95	1703	>sp|P02817|AMELX_BOVIN Amelogenin, X isoform OS=Bos taurus OX=9913 GN=AMELX PE=1 SV=2	1	hf1_10472_ebo_30_1_261219.ScanId;v=1;d1=17741.17741.3	controllerType=0 controllerNumber=1 scan=17741	38.8376
16385:2	1	S.M[+15.995]PLPPHPGHPGYINFS.Y		M[+16]	888.936	2	1776.87	1776.85	0	7	17	Non	477.81	335.2	36.5	5.15	1703	>sp|P02817|AMELX_BOVIN Amelogenin, X isoform OS=Bos taurus OX=9913 GN=AMELX PE=1 SV=2	1	hf1_10472_ebo_30_1_261219.ScanId;v=1;d1=13414.13414.2	controllerType=0 controllerNumber=1 scan=13414	31.3368
22254:3	1	S.MPLPPHPGHPGYINFS[+79.966].Y		S[+80]	614.284	3	1840.84	1840.82	0	7.8	17	Non	484.86	371.28	322.2	6.01	1703	>sp|P02817|AMELX_BOVIN Amelogenin, X isoform OS=Bos taurus OX=9913 GN=AMELX PE=1 SV=2	1	hf1_10472_ebo_30_1_261219.ScanId;v=1;d1=17540.17540.3	controllerType=0 controllerNumber=1 scan=17540	38.4944
16104:2	1	S.M[+15.995]PLPPHPGHPGYINFS.Y		M[+16]	888.934	2	1776.86	1776.85	0	4.2	17	Non	503.39	330.75	31.19	5.52	1703	>sp|P02817|AMELX_BOVIN Amelogenin, X isoform OS=Bos taurus OX=9913 GN=AMELX PE=1 SV=2	1	hf1_10472_ebo_30_1_261219.ScanId;v=1;d1=13213.13213.2	controllerType=0 controllerNumber=1 scan=13213	30.9853
16639:2	1	S.M[+15.995]PLPPHPGHPGYINFS.Y		M[+16]	888.933	2	1776.86	1776.85	0	3.6	17	Non	504.66	201.58	34.78	4.37	1703	>sp|P02817|AMELX_BOVIN Amelogenin, X isoform OS=Bos taurus OX=9913 GN=AMELX PE=1 SV=2	1	hf1_10472_ebo_30_1_261219.ScanId;v=1;d1=13605.13605.2	controllerType=0 controllerNumber=1 scan=13605	31.6811
22637:2	1	S.MPLPPHPGHPGYINFS[+79.966].Y		S[+80]	920.923	2	1840.84	1840.82	0	7.5	17	Non	553.47	553.47	307.08	6.4	1703	>sp|P02817|AMELX_BOVIN Amelogenin, X isoform OS=Bos taurus OX=9913 GN=AMELX PE=1 SV=2	1	hf1_10472_ebo_30_1_261219.ScanId;v=1;d1=17795.17795.2	controllerType=0 controllerNumber=1 scan=17795	38.9307
22341:2	1	S.MPLPPHPGHPGYINFS[+79.966].Y		S[+80]	920.923	2	1840.84	1840.82	0	7.5	17	Non	621.34	621.34	350.14	8.27	1703	>sp|P02817|AMELX_BOVIN Amelogenin, X isoform OS=Bos taurus OX=9913 GN=AMELX PE=1 SV=2	1	hf1_10472_ebo_30_1_261219.ScanId;v=1;d1=17595.17595.2	controllerType=0 controllerNumber=1 scan=17595	38.5856
22031:2	1	S.MPLPPHPGHPGYINFS[+79.966].Y		S[+80]	920.923	2	1840.84	1840.82	0	8.4	17	Non	667.66	517.17	328.23	9.53	1703	>sp|P02817|AMELX_BOVIN Amelogenin, X isoform OS=Bos taurus OX=9913 GN=AMELX PE=1 SV=2	1	hf1_10472_ebo_30_1_261219.ScanId;v=1;d1=17396.17396.2	controllerType=0 controllerNumber=1 scan=17396	38.2486
50544:3	1	S.MP[+15.995]LPPHPGHPGYINFS[+79.966].Y		P[+16], S[+80]	619.614	3	1856.83	1856.82	0	4.2	17	Non	93.71	93.71	4	1.96	1703	>sp|P02817|AMELX_BOVIN Amelogenin, X isoform OS=Bos taurus OX=9913 GN=AMELX PE=1 SV=2	1	hf1_10472_ebo_30_1_261219.ScanId;v=1;d1=37158.37158.3	controllerType=0 controllerNumber=1 scan=37158	77.0835
49738:3	1	S.MP[+15.995]LPPHPGHPGYINFS[+79.966].Y		P[+16], S[+80]	619.614	3	1856.83	1856.82	0	4.5	17	Non	111.32	111.32	4	1.3	1703	>sp|P02817|AMELX_BOVIN Amelogenin, X isoform OS=Bos taurus OX=9913 GN=AMELX PE=1 SV=2	1	hf1_10472_ebo_30_1_261219.ScanId;v=1;d1=36098.36098.3	controllerType=0 controllerNumber=1 scan=36098	72.864
49080:3	1	S.MP[+15.995]LPPHPGHPGYINFS[+79.966].Y		P[+16], S[+80]	619.614	3	1856.83	1856.82	0	3.7	17	Non	122.7	122.7	4	1.49	1703	>sp|P02817|AMELX_BOVIN Amelogenin, X isoform OS=Bos taurus OX=9913 GN=AMELX PE=1 SV=2	1	hf1_10472_ebo_30_1_261219.ScanId;v=1;d1=35613.35613.3	controllerType=0 controllerNumber=1 scan=35613	71.8113
47409:3	1	S.MP[+15.995]LPPHPGHPGYINFS[+79.966].Y		P[+16], S[+80]	619.613	3	1856.82	1856.82	0	3.2	17	Non	124.32	124.32	4	1.49	1703	>sp|P02817|AMELX_BOVIN Amelogenin, X isoform OS=Bos taurus OX=9913 GN=AMELX PE=1 SV=2	1	hf1_10472_ebo_30_1_261219.ScanId;v=1;d1=34364.34364.3	controllerType=0 controllerNumber=1 scan=34364	69.1759
48854:3	1	S.MP[+15.995]LPPHPGHPGYINFS[+79.966].Y		P[+16], S[+80]	619.615	3	1856.83	1856.82	0	6.8	17	Non	131.52	131.52	4	1.42	1703	>sp|P02817|AMELX_BOVIN Amelogenin, X isoform OS=Bos taurus OX=9913 GN=AMELX PE=1 SV=2	1	hf1_10472_ebo_30_1_261219.ScanId;v=1;d1=35449.35449.3	controllerType=0 controllerNumber=1 scan=35449	71.4671
19108:2	1	S.MP[+15.995]LPPHPGHPGYINFS[+79.966].Y		P[+16], S[+80]	928.918	2	1856.83	1856.82	0	5.7	17	Non	146.46	146.46	8.49	1.95	1703	>sp|P02817|AMELX_BOVIN Amelogenin, X isoform OS=Bos taurus OX=9913 GN=AMELX PE=1 SV=2	1	hf1_10472_ebo_30_1_261219.ScanId;v=1;d1=15395.15395.2	controllerType=0 controllerNumber=1 scan=15395	34.819
48216:3	1	S.MP[+15.995]LPPHPGHPGYINFS[+79.966].Y		P[+16], S[+80]	619.613	3	1856.83	1856.82	0	3.6	17	Non	147.2	147.2	4	1.49	1703	>sp|P02817|AMELX_BOVIN Amelogenin, X isoform OS=Bos taurus OX=9913 GN=AMELX PE=1 SV=2	1	hf1_10472_ebo_30_1_261219.ScanId;v=1;d1=34958.34958.3	controllerType=0 controllerNumber=1 scan=34958	70.3955
49327:3	1	S.MP[+15.995]LPPHPGHPGYINFS[+79.966].Y		P[+16], S[+80]	619.614	3	1856.83	1856.82	0	3.9	17	Non	156.4	156.4	4	1.49	1703	>sp|P02817|AMELX_BOVIN Amelogenin, X isoform OS=Bos taurus OX=9913 GN=AMELX PE=1 SV=2	1	hf1_10472_ebo_30_1_261219.ScanId;v=1;d1=35787.35787.3	controllerType=0 controllerNumber=1 scan=35787	72.1528
45922:3	1	S.MP[+15.995]LPPHPGHPGYINFS[+79.966].Y		P[+16], S[+80]	619.613	3	1856.82	1856.82	0	2.5	17	Non	167.43	167.43	4	2.48	1703	>sp|P02817|AMELX_BOVIN Amelogenin, X isoform OS=Bos taurus OX=9913 GN=AMELX PE=1 SV=2	1	hf1_10472_ebo_30_1_261219.ScanId;v=1;d1=33264.33264.3	controllerType=0 controllerNumber=1 scan=33264	66.7937
47179:3	1	S.MP[+15.995]LPPHPGHPGYINFS[+79.966].Y		P[+16], S[+80]	619.613	3	1856.82	1856.82	0	2.3	17	Non	169.11	169.11	4	2.41	1703	>sp|P02817|AMELX_BOVIN Amelogenin, X isoform OS=Bos taurus OX=9913 GN=AMELX PE=1 SV=2	1	hf1_10472_ebo_30_1_261219.ScanId;v=1;d1=34202.34202.3	controllerType=0 controllerNumber=1 scan=34202	68.8377
23530:3	1	S.MPLPPHPGHPGYIN[+0.984]FS[+79.966].Y		N[+1], S[+80]	614.611	3	1841.82	1841.81	0	4.9	17	Non	170.21	170.21	164.83	2.76	1703	>sp|P02817|AMELX_BOVIN Amelogenin, X isoform OS=Bos taurus OX=9913 GN=AMELX PE=1 SV=2	1	hf1_10472_ebo_30_1_261219.ScanId;v=1;d1=18375.18375.3	controllerType=0 controllerNumber=1 scan=18375	39.9021
46347:3	1	S.MP[+15.995]LPPHPGHPGYINFS[+79.966].Y		P[+16], S[+80]	619.614	3	1856.83	1856.82	0	5	17	Non	187.98	187.98	4	2.89	1703	>sp|P02817|AMELX_BOVIN Amelogenin, X isoform OS=Bos taurus OX=9913 GN=AMELX PE=1 SV=2	1	hf1_10472_ebo_30_1_261219.ScanId;v=1;d1=33590.33590.3	controllerType=0 controllerNumber=1 scan=33590	67.4709
46153:3	1	S.MP[+15.995]LPPHPGHPGYINFS[+79.966].Y		P[+16], S[+80]	619.613	3	1856.82	1856.82	0	2.7	17	Non	198.98	198.98	4	2.48	1703	>sp|P02817|AMELX_BOVIN Amelogenin, X isoform OS=Bos taurus OX=9913 GN=AMELX PE=1 SV=2	1	hf1_10472_ebo_30_1_261219.ScanId;v=1;d1=33434.33434.3	controllerType=0 controllerNumber=1 scan=33434	67.1344
23804:2	1	S.MPLPPHPGHPGYIN[+0.984]FS[+79.966].Y		N[+1], S[+80]	921.413	2	1841.82	1841.81	0	5.5	17	Non	200.78	200.78	143.49	3.42	1703	>sp|P02817|AMELX_BOVIN Amelogenin, X isoform OS=Bos taurus OX=9913 GN=AMELX PE=1 SV=2	1	hf1_10472_ebo_30_1_261219.ScanId;v=1;d1=18558.18558.2	controllerType=0 controllerNumber=1 scan=18558	40.2163
21246:3	1	S.M[+31.990]PLPPHPGHPGYINFS[+79.966].Y		M[+32], S[+80]	624.939	3	1872.8	1872.81	0	-6.3	17	Non	201.31	194.44	6.64	1.26	1703	>sp|P02817|AMELX_BOVIN Amelogenin, X isoform OS=Bos taurus OX=9913 GN=AMELX PE=1 SV=2	1	hf1_10472_ebo_30_1_261219.ScanId;v=1;d1=16874.16874.3	controllerType=0 controllerNumber=1 scan=16874	37.3564
23497:2	1	S.MPLPPHPGHPGYIN[+0.984]FS[+79.966].Y		N[+1], S[+80]	921.412	2	1841.82	1841.81	0	4.9	17	Non	203.85	203.85	144.86	3.27	1703	>sp|P02817|AMELX_BOVIN Amelogenin, X isoform OS=Bos taurus OX=9913 GN=AMELX PE=1 SV=2	1	hf1_10472_ebo_30_1_261219.ScanId;v=1;d1=18353.18353.2	controllerType=0 controllerNumber=1 scan=18353	39.8668
46749:3	1	S.MP[+15.995]LPPHPGHPGYINFS[+79.966].Y		P[+16], S[+80]	619.615	3	1856.83	1856.82	0	5.9	17	Non	206.68	206.68	4	3.17	1703	>sp|P02817|AMELX_BOVIN Amelogenin, X isoform OS=Bos taurus OX=9913 GN=AMELX PE=1 SV=2	1	hf1_10472_ebo_30_1_261219.ScanId;v=1;d1=33889.33889.3	controllerType=0 controllerNumber=1 scan=33889	68.1517
46955:3	1	S.MP[+15.995]LPPHPGHPGYINFS[+79.966].Y		P[+16], S[+80]	619.613	3	1856.82	1856.82	0	2.6	17	Non	208.69	208.69	4	2.68	1703	>sp|P02817|AMELX_BOVIN Amelogenin, X isoform OS=Bos taurus OX=9913 GN=AMELX PE=1 SV=2	1	hf1_10472_ebo_30_1_261219.ScanId;v=1;d1=34042.34042.3	controllerType=0 controllerNumber=1 scan=34042	68.4952
00188:2	1	S.M[+15.995]PLPPHPGHPGYINFS[+79.966].Y		M[+16], S[+80]	928.911	2	1856.82	1856.82	0	-1.8	17	Non	210.91	210.91	5.39	2.58	1703	>sp|P02817|AMELX_BOVIN Amelogenin, X isoform OS=Bos taurus OX=9913 GN=AMELX PE=1 SV=2	1	hf1_10472_ebo_30_1_261219.ScanId;v=1;d1=191.191.3	controllerType=0 controllerNumber=1 scan=191	0.5896
18807:3	1	S.MP[+15.995]LPPHPGHPGYIN[+0.984]FS.Y		N[+1], P[+16]	593.287	3	1777.85	1777.84	0	5.3	17	Non	214.25	21.58	4	1.25	1703	>sp|P02817|AMELX_BOVIN Amelogenin, X isoform OS=Bos taurus OX=9913 GN=AMELX PE=1 SV=2	1	hf1_10472_ebo_30_1_261219.ScanId;v=1;d1=15181.15181.3	controllerType=0 controllerNumber=1 scan=15181	34.4567
22844:3	1	S.MP[+15.995]LPPHPGHPGYINFS[+79.966].Y		P[+16], S[+80]	619.612	3	1856.82	1856.82	0	1.8	17	Non	215.28	215.28	5.35	2.29	1703	>sp|P02817|AMELX_BOVIN Amelogenin, X isoform OS=Bos taurus OX=9913 GN=AMELX PE=1 SV=2	1	hf1_10472_ebo_30_1_261219.ScanId;v=1;d1=17930.17930.3	controllerType=0 controllerNumber=1 scan=17930	39.1557
20557:3	1	S.M[+31.990]PLPPHPGHPGYINFS[+79.966].Y		M[+32], S[+80]	624.94	3	1872.8	1872.81	0	-4.9	17	Non	232.77	232.77	6.47	2.31	1703	>sp|P02817|AMELX_BOVIN Amelogenin, X isoform OS=Bos taurus OX=9913 GN=AMELX PE=1 SV=2	1	hf1_10472_ebo_30_1_261219.ScanId;v=1;d1=16398.16398.3	controllerType=0 controllerNumber=1 scan=16398	36.5351
17645:3	1	S.MP[+15.995]LPPHPGHPGYINFS[+79.966].Y		P[+16], S[+80]	619.614	3	1856.83	1856.82	0	4.5	17	Non	233.6	233.6	4	3.02	1703	>sp|P02817|AMELX_BOVIN Amelogenin, X isoform OS=Bos taurus OX=9913 GN=AMELX PE=1 SV=2	1	hf1_10472_ebo_30_1_261219.ScanId;v=1;d1=14338.14338.3	controllerType=0 controllerNumber=1 scan=14338	32.9701
20952:3	1	S.M[+31.990]PLPPHPGHPGYINFS[+79.966].Y		M[+32], S[+80]	624.941	3	1872.81	1872.81	0	-2.4	17	Non	236.65	236.65	6.5	2.38	1703	>sp|P02817|AMELX_BOVIN Amelogenin, X isoform OS=Bos taurus OX=9913 GN=AMELX PE=1 SV=2	1	hf1_10472_ebo_30_1_261219.ScanId;v=1;d1=16671.16671.3	controllerType=0 controllerNumber=1 scan=16671	37.0055
22338:3	1	S.MP[+15.995]LPPHPGHPGYINFS[+79.966].Y		P[+16], S[+80]	619.609	3	1856.81	1856.82	0	-2.9	17	Non	239.52	209.49	5.8	2.38	1703	>sp|P02817|AMELX_BOVIN Amelogenin, X isoform OS=Bos taurus OX=9913 GN=AMELX PE=1 SV=2	1	hf1_10472_ebo_30_1_261219.ScanId;v=1;d1=17592.17592.3	controllerType=0 controllerNumber=1 scan=17592	38.5783
20041:3	1	S.MP[+31.990]LPPHPGHPGYINFS[+79.966].Y		P[+32], S[+80]	624.946	3	1872.82	1872.81	0	4.4	17	Non	245.94	208.78	1.8	4.2	1703	>sp|P02817|AMELX_BOVIN Amelogenin, X isoform OS=Bos taurus OX=9913 GN=AMELX PE=1 SV=2	1	hf1_10472_ebo_30_1_261219.ScanId;v=1;d1=16045.16045.3	controllerType=0 controllerNumber=1 scan=16045	35.9346
20337:3	1	S.MP[+31.990]LPPHPGHPGYINFS[+79.966].Y		P[+32], S[+80]	624.948	3	1872.83	1872.81	0	9.1	17	Non	253.09	253.09	1.8	3.38	1703	>sp|P02817|AMELX_BOVIN Amelogenin, X isoform OS=Bos taurus OX=9913 GN=AMELX PE=1 SV=2	1	hf1_10472_ebo_30_1_261219.ScanId;v=1;d1=16248.16248.3	controllerType=0 controllerNumber=1 scan=16248	36.2794
19438:3	1	S.MP[+31.990]LPPHPGHPGYINFS[+79.966].Y		P[+32], S[+80]	624.942	3	1872.81	1872.81	0	-1.8	17	Non	285.19	285.19	1.8	3.76	1703	>sp|P02817|AMELX_BOVIN Amelogenin, X isoform OS=Bos taurus OX=9913 GN=AMELX PE=1 SV=2	1	hf1_10472_ebo_30_1_261219.ScanId;v=1;d1=15631.15631.3	controllerType=0 controllerNumber=1 scan=15631	35.236
23511:3	1	S.MPLPPHPGHPGYIN[+0.984]FS[+79.966].Y		N[+1], S[+80]	614.611	3	1841.82	1841.81	0	5	17	Non	302.72	174.69	174.69	4.15	1703	>sp|P02817|AMELX_BOVIN Amelogenin, X isoform OS=Bos taurus OX=9913 GN=AMELX PE=1 SV=2	1	hf1_10472_ebo_30_1_261219.ScanId;v=1;d1=18362.18362.3	controllerType=0 controllerNumber=1 scan=18362	39.8814
18170:3	1	S.M[+15.995]PLPPHPGHPGYINFS[+79.966].Y		M[+16], S[+80]	619.615	3	1856.83	1856.82	0	5.4	17	Non	312.68	312.68	14.41	4.95	1703	>sp|P02817|AMELX_BOVIN Amelogenin, X isoform OS=Bos taurus OX=9913 GN=AMELX PE=1 SV=2	1	hf1_10472_ebo_30_1_261219.ScanId;v=1;d1=14728.14728.3	controllerType=0 controllerNumber=1 scan=14728	33.662
18994:3	1	S.M[+15.995]PLPPHPGHPGYINFS[+79.966].Y		M[+16], S[+80]	619.614	3	1856.83	1856.82	0	4.9	17	Non	312.78	312.78	6.36	4.8	1703	>sp|P02817|AMELX_BOVIN Amelogenin, X isoform OS=Bos taurus OX=9913 GN=AMELX PE=1 SV=2	1	hf1_10472_ebo_30_1_261219.ScanId;v=1;d1=15317.15317.3	controllerType=0 controllerNumber=1 scan=15317	34.69
17250:3	1	S.MP[+15.995]LPPHPGHPGYIN[+0.984]FS.Y		N[+1], P[+16]	593.285	3	1777.84	1777.84	0	1.9	17	Non	314.5	267.86	4	3.98	1703	>sp|P02817|AMELX_BOVIN Amelogenin, X isoform OS=Bos taurus OX=9913 GN=AMELX PE=1 SV=2	1	hf1_10472_ebo_30_1_261219.ScanId;v=1;d1=14044.14044.3	controllerType=0 controllerNumber=1 scan=14044	32.4487
19562:3	1	S.M[+15.995]PLPPHPGHPGYINFS[+79.966].Y		M[+16], S[+80]	619.611	3	1856.82	1856.82	0	0	17	Non	314.93	314.93	5.72	3.94	1703	>sp|P02817|AMELX_BOVIN Amelogenin, X isoform OS=Bos taurus OX=9913 GN=AMELX PE=1 SV=2	1	hf1_10472_ebo_30_1_261219.ScanId;v=1;d1=15717.15717.3	controllerType=0 controllerNumber=1 scan=15717	35.384
18438:3	1	S.MP[+15.995]LPPHPGHPGYINFS[+79.966].Y		P[+16], S[+80]	619.614	3	1856.83	1856.82	0	4.9	17	Non	319.7	319.7	4	4.8	1703	>sp|P02817|AMELX_BOVIN Amelogenin, X isoform OS=Bos taurus OX=9913 GN=AMELX PE=1 SV=2	1	hf1_10472_ebo_30_1_261219.ScanId;v=1;d1=14921.14921.3	controllerType=0 controllerNumber=1 scan=14921	34.0046
17903:3	1	S.MP[+15.995]LPPHPGHPGYINFS[+79.966].Y		P[+16], S[+80]	619.615	3	1856.83	1856.82	0	5.6	17	Non	339.13	339.13	4	4.97	1703	>sp|P02817|AMELX_BOVIN Amelogenin, X isoform OS=Bos taurus OX=9913 GN=AMELX PE=1 SV=2	1	hf1_10472_ebo_30_1_261219.ScanId;v=1;d1=14533.14533.3	controllerType=0 controllerNumber=1 scan=14533	33.3142
19736:3	1	S.M[+31.990]PLPPHPGHPGYINFS[+79.966].Y		M[+32], S[+80]	624.947	3	1872.83	1872.81	0	6.6	17	Non	344.77	344.77	6.47	4.88	1703	>sp|P02817|AMELX_BOVIN Amelogenin, X isoform OS=Bos taurus OX=9913 GN=AMELX PE=1 SV=2	1	hf1_10472_ebo_30_1_261219.ScanId;v=1;d1=15839.15839.3	controllerType=0 controllerNumber=1 scan=15839	35.5921
19277:3	1	S.MP[+15.995]LPPHPGHPGYINFS[+79.966].Y		P[+16], S[+80]	619.612	3	1856.82	1856.82	0	1.8	17	Non	346.57	346.57	4	4.27	1703	>sp|P02817|AMELX_BOVIN Amelogenin, X isoform OS=Bos taurus OX=9913 GN=AMELX PE=1 SV=2	1	hf1_10472_ebo_30_1_261219.ScanId;v=1;d1=15519.15519.3	controllerType=0 controllerNumber=1 scan=15519	35.0408
19729:2	1	S.M[+31.990]PLPPHPGHPGYINFS[+79.966].Y		M[+32], S[+80]	936.915	2	1872.82	1872.81	0	4.5	17	Non	353.23	353.23	11.64	5.23	1703	>sp|P02817|AMELX_BOVIN Amelogenin, X isoform OS=Bos taurus OX=9913 GN=AMELX PE=1 SV=2	1	hf1_10472_ebo_30_1_261219.ScanId;v=1;d1=15833.15833.2	controllerType=0 controllerNumber=1 scan=15833	35.5808
16851:3	1	S.MP[+15.995]LPPHPGHPGYIN[+0.984]FS.Y		N[+1], P[+16]	593.287	3	1777.85	1777.84	0	6.1	17	Non	364.95	272.01	4	4.92	1703	>sp|P02817|AMELX_BOVIN Amelogenin, X isoform OS=Bos taurus OX=9913 GN=AMELX PE=1 SV=2	1	hf1_10472_ebo_30_1_261219.ScanId;v=1;d1=13758.13758.3	controllerType=0 controllerNumber=1 scan=13758	31.9441
18716:3	1	S.M[+15.995]PLPPHPGHPGYINFS[+79.966].Y		M[+16], S[+80]	619.615	3	1856.83	1856.82	0	5.3	17	Non	386.57	386.57	4.77	5.94	1703	>sp|P02817|AMELX_BOVIN Amelogenin, X isoform OS=Bos taurus OX=9913 GN=AMELX PE=1 SV=2	1	hf1_10472_ebo_30_1_261219.ScanId;v=1;d1=15115.15115.3	controllerType=0 controllerNumber=1 scan=15115	34.3469
17739:2	1	S.M[+15.995]PLPPHPGHPGYINFS[+79.966].Y		M[+16], S[+80]	928.918	2	1856.83	1856.82	0	5.3	17	Non	395.3	395.3	22.92	6.32	1703	>sp|P02817|AMELX_BOVIN Amelogenin, X isoform OS=Bos taurus OX=9913 GN=AMELX PE=1 SV=2	1	hf1_10472_ebo_30_1_261219.ScanId;v=1;d1=14411.14411.2	controllerType=0 controllerNumber=1 scan=14411	33.102
50186:3	1	S.M[+15.995]PLPPHPGHPGYINFS[+79.966].Y		M[+16], S[+80]	619.616	3	1856.83	1856.82	0	8.1	17	Non	401.46	360.44	13.83	6.03	1703	>sp|P02817|AMELX_BOVIN Amelogenin, X isoform OS=Bos taurus OX=9913 GN=AMELX PE=1 SV=2	1	hf1_10472_ebo_30_1_261219.ScanId;v=1;d1=36428.36428.3	controllerType=0 controllerNumber=1 scan=36428	73.5537
50127:2	1	S.M[+15.995]PLPPHPGHPGYINFS[+79.966].Y		M[+16], S[+80]	928.915	2	1856.82	1856.82	0	2.1	17	Non	419.92	419.92	10.76	5.67	1703	>sp|P02817|AMELX_BOVIN Amelogenin, X isoform OS=Bos taurus OX=9913 GN=AMELX PE=1 SV=2	1	hf1_10472_ebo_30_1_261219.ScanId;v=1;d1=36386.36386.3	controllerType=0 controllerNumber=1 scan=36386	73.4804
17203:2	1	S.M[+15.995]PLPPHPGHPGYIN[+0.984]FS.Y		M[+16], N[+1]	889.428	2	1777.85	1777.84	0	6.9	17	Non	424.8	303.46	31.86	5.14	1703	>sp|P02817|AMELX_BOVIN Amelogenin, X isoform OS=Bos taurus OX=9913 GN=AMELX PE=1 SV=2	1	hf1_10472_ebo_30_1_261219.ScanId;v=1;d1=14012.14012.2	controllerType=0 controllerNumber=1 scan=14012	32.3892
16928:2	1	S.M[+15.995]PLPPHPGHPGYIN[+0.984]FS.Y		M[+16], N[+1]	889.428	2	1777.85	1777.84	0	6.5	17	Non	439.64	364.49	35.41	6.14	1703	>sp|P02817|AMELX_BOVIN Amelogenin, X isoform OS=Bos taurus OX=9913 GN=AMELX PE=1 SV=2	1	hf1_10472_ebo_30_1_261219.ScanId;v=1;d1=13812.13812.2	controllerType=0 controllerNumber=1 scan=13812	32.0402
23193:3	1	S.MPLPPHPGHPGYIN[+0.984]FS[+79.966].Y		N[+1], S[+80]	614.611	3	1841.82	1841.81	0	6.4	17	Non	513.32	388.23	337.05	6.11	1703	>sp|P02817|AMELX_BOVIN Amelogenin, X isoform OS=Bos taurus OX=9913 GN=AMELX PE=1 SV=2	1	hf1_10472_ebo_30_1_261219.ScanId;v=1;d1=18152.18152.3	controllerType=0 controllerNumber=1 scan=18152	39.5321
22982:2	1	S.MPLPPHPGHPGYIN[+0.984]FS[+79.966].Y		N[+1], S[+80]	921.416	2	1841.83	1841.81	0	9.4	17	Non	527.37	396.67	277.65	6.01	1703	>sp|P02817|AMELX_BOVIN Amelogenin, X isoform OS=Bos taurus OX=9913 GN=AMELX PE=1 SV=2	1	hf1_10472_ebo_30_1_261219.ScanId;v=1;d1=18019.18019.2	controllerType=0 controllerNumber=1 scan=18019	39.305
19388:2	1	S.M[+15.995]PLPPHPGHPGYINFS[+79.966].Y		M[+16], S[+80]	928.912	2	1856.82	1856.82	0	-1.7	17	Non	560.45	560.45	23.41	7.07	1703	>sp|P02817|AMELX_BOVIN Amelogenin, X isoform OS=Bos taurus OX=9913 GN=AMELX PE=1 SV=2	1	hf1_10472_ebo_30_1_261219.ScanId;v=1;d1=15597.15597.2	controllerType=0 controllerNumber=1 scan=15597	35.1784
18825:2	1	S.M[+15.995]PLPPHPGHPGYINFS[+79.966].Y		M[+16], S[+80]	928.919	2	1856.83	1856.82	0	6.4	17	Non	571.68	571.68	37.12	7.88	1703	>sp|P02817|AMELX_BOVIN Amelogenin, X isoform OS=Bos taurus OX=9913 GN=AMELX PE=1 SV=2	1	hf1_10472_ebo_30_1_261219.ScanId;v=1;d1=15196.15196.2	controllerType=0 controllerNumber=1 scan=15196	34.484
23306:2	1	S.MPLPPHPGHPGYIN[+0.984]FS[+79.966].Y		N[+1], S[+80]	921.414	2	1841.82	1841.81	0	6.4	17	Non	576.4	446.62	337.39	7.17	1703	>sp|P02817|AMELX_BOVIN Amelogenin, X isoform OS=Bos taurus OX=9913 GN=AMELX PE=1 SV=2	1	hf1_10472_ebo_30_1_261219.ScanId;v=1;d1=18228.18228.2	controllerType=0 controllerNumber=1 scan=18228	39.661
18013:2	1	S.M[+15.995]PLPPHPGHPGYINFS[+79.966].Y		M[+16], S[+80]	928.919	2	1856.83	1856.82	0	6	17	Non	587.1	587.1	33.89	7.94	1703	>sp|P02817|AMELX_BOVIN Amelogenin, X isoform OS=Bos taurus OX=9913 GN=AMELX PE=1 SV=2	1	hf1_10472_ebo_30_1_261219.ScanId;v=1;d1=14610.14610.2	controllerType=0 controllerNumber=1 scan=14610	33.4516
19112:2	1	S.M[+15.995]PLPPHPGHPGYINFS[+79.966].Y		M[+16], S[+80]	928.917	2	1856.83	1856.82	0	4.5	17	Non	587.44	587.44	28.76	7.24	1703	>sp|P02817|AMELX_BOVIN Amelogenin, X isoform OS=Bos taurus OX=9913 GN=AMELX PE=1 SV=2	1	hf1_10472_ebo_30_1_261219.ScanId;v=1;d1=15398.15398.2	controllerType=0 controllerNumber=1 scan=15398	34.8262
18276:2	1	S.M[+15.995]PLPPHPGHPGYINFS[+79.966].Y		M[+16], S[+80]	928.919	2	1856.83	1856.82	0	6.1	17	Non	613.21	613.21	38.25	8.94	1703	>sp|P02817|AMELX_BOVIN Amelogenin, X isoform OS=Bos taurus OX=9913 GN=AMELX PE=1 SV=2	1	hf1_10472_ebo_30_1_261219.ScanId;v=1;d1=14806.14806.2	controllerType=0 controllerNumber=1 scan=14806	33.8002
18554:2	1	S.M[+15.995]PLPPHPGHPGYINFS[+79.966].Y		M[+16], S[+80]	928.919	2	1856.83	1856.82	0	6.3	17	Non	635.71	635.71	25.9	8.88	1703	>sp|P02817|AMELX_BOVIN Amelogenin, X isoform OS=Bos taurus OX=9913 GN=AMELX PE=1 SV=2	1	hf1_10472_ebo_30_1_261219.ScanId;v=1;d1=15001.15001.2	controllerType=0 controllerNumber=1 scan=15001	34.1447
17412:3	1	S.M[+15.995]PLPPHPGHPGY[+15.995]INFS[+79.966].Y		M[+16], S[+80], Y[+16]	624.947	3	1872.83	1872.81	0	6.3	17	Non	152.14	152.14	2.33	2.3	1703	>sp|P02817|AMELX_BOVIN Amelogenin, X isoform OS=Bos taurus OX=9913 GN=AMELX PE=1 SV=2	1	hf1_10472_ebo_30_1_261219.ScanId;v=1;d1=14160.14160.3	controllerType=0 controllerNumber=1 scan=14160	32.655
17337:3	1	S.M[+15.995]PLPPHPGHPGY[+15.995]INFS[+79.966].Y		M[+16], S[+80], Y[+16]	624.947	3	1872.83	1872.81	0	6.6	17	Non	158.62	158.62	1.36	1.42	1703	>sp|P02817|AMELX_BOVIN Amelogenin, X isoform OS=Bos taurus OX=9913 GN=AMELX PE=1 SV=2	1	hf1_10472_ebo_30_1_261219.ScanId;v=1;d1=14109.14109.3	controllerType=0 controllerNumber=1 scan=14109	32.5655
22634:2	1	S.M[+15.995]PLPPHPGHPGYIN[+0.984]FS[+79.966].Y		M[+16], N[+1], S[+80]	929.413	2	1857.82	1857.8	0	8.9	17	Non	168.67	168.67	3.36	1.36	1703	>sp|P02817|AMELX_BOVIN Amelogenin, X isoform OS=Bos taurus OX=9913 GN=AMELX PE=1 SV=2	1	hf1_10472_ebo_30_1_261219.ScanId;v=1;d1=17792.17792.2	controllerType=0 controllerNumber=1 scan=17792	38.9234
19167:3	1	S.M[+15.995]PLPPHPGHP[+15.995]GYINFS[+79.966].Y		M[+16], P[+16], S[+80]	624.938	3	1872.8	1872.81	0	-7.2	17	Non	186.85	186.85	0.99	1.57	1703	>sp|P02817|AMELX_BOVIN Amelogenin, X isoform OS=Bos taurus OX=9913 GN=AMELX PE=1 SV=2	1	hf1_10472_ebo_30_1_261219.ScanId;v=1;d1=15438.15438.3	controllerType=0 controllerNumber=1 scan=15438	34.8934
17668:3	1	S.M[+15.995]PLPPHPGHP[+15.995]GYINFS[+79.966].Y		M[+16], P[+16], S[+80]	624.946	3	1872.82	1872.81	0	5	17	Non	192.44	192.44	5.88	2.76	1703	>sp|P02817|AMELX_BOVIN Amelogenin, X isoform OS=Bos taurus OX=9913 GN=AMELX PE=1 SV=2	1	hf1_10472_ebo_30_1_261219.ScanId;v=1;d1=14357.14357.3	controllerType=0 controllerNumber=1 scan=14357	33.0034
21247:3	1	S.M[+31.990]PLPPHPGHPGYIN[+0.984]FS[+79.966].Y		M[+32], N[+1], S[+80]	625.275	3	1873.81	1873.8	0	7.6	17	Non	223.57	122.79	6.64	1.42	1703	>sp|P02817|AMELX_BOVIN Amelogenin, X isoform OS=Bos taurus OX=9913 GN=AMELX PE=1 SV=2	1	hf1_10472_ebo_30_1_261219.ScanId;v=1;d1=16874.16874.3	controllerType=0 controllerNumber=1 scan=16874	37.3564
18881:3	1	S.M[+15.995]PLPPHPGHP[+15.995]GYINFS[+79.966].Y		M[+16], P[+16], S[+80]	624.939	3	1872.8	1872.81	0	-6	17	Non	227.81	227.81	3.36	2.31	1703	>sp|P02817|AMELX_BOVIN Amelogenin, X isoform OS=Bos taurus OX=9913 GN=AMELX PE=1 SV=2	1	hf1_10472_ebo_30_1_261219.ScanId;v=1;d1=15235.15235.3	controllerType=0 controllerNumber=1 scan=15235	34.5509
17097:2	1	S.M[+15.995]PLPPHPGHP[+15.995]GYINFS[+79.966].Y		M[+16], P[+16], S[+80]	936.917	2	1872.83	1872.81	0	6.3	17	Non	263.47	263.47	0	4.61	1703	>sp|P02817|AMELX_BOVIN Amelogenin, X isoform OS=Bos taurus OX=9913 GN=AMELX PE=1 SV=2	1	hf1_10472_ebo_30_1_261219.ScanId;v=1;d1=13929.13929.2	controllerType=0 controllerNumber=1 scan=13929	32.2431
18637:2	1	S.M[+15.995]PLPPHPGHPGY[+15.995]INFS[+79.966].Y		M[+16], S[+80], Y[+16]	936.914	2	1872.82	1872.81	0	3.2	17	Non	266.85	266.85	0	4.07	1703	>sp|P02817|AMELX_BOVIN Amelogenin, X isoform OS=Bos taurus OX=9913 GN=AMELX PE=1 SV=2	1	hf1_10472_ebo_30_1_261219.ScanId;v=1;d1=15059.15059.4	controllerType=0 controllerNumber=1 scan=15059	34.2439
22339:3	1	S.MP[+15.995]LPPHPGHPGYIN[+0.984]FS[+79.966].Y		N[+1], P[+16], S[+80]	619.943	3	1857.81	1857.8	0	6.4	17	Non	267.56	206.33	6.49	4.13	1703	>sp|P02817|AMELX_BOVIN Amelogenin, X isoform OS=Bos taurus OX=9913 GN=AMELX PE=1 SV=2	1	hf1_10472_ebo_30_1_261219.ScanId;v=1;d1=17592.17592.3	controllerType=0 controllerNumber=1 scan=17592	38.5783
17393:3	1	S.M[+15.995]PLPPHPGHP[+15.995]GYINFS[+79.966].Y		M[+16], P[+16], S[+80]	624.946	3	1872.82	1872.81	0	5	17	Non	277.88	277.88	3.07	4.58	1703	>sp|P02817|AMELX_BOVIN Amelogenin, X isoform OS=Bos taurus OX=9913 GN=AMELX PE=1 SV=2	1	hf1_10472_ebo_30_1_261219.ScanId;v=1;d1=14149.14149.3	controllerType=0 controllerNumber=1 scan=14149	32.6369
22014:3	1	S.MP[+15.995]LPPHPGHPGYIN[+0.984]FS[+79.966].Y		N[+1], P[+16], S[+80]	619.944	3	1857.82	1857.8	0	7.7	17	Non	282	282	25.37	4.55	1703	>sp|P02817|AMELX_BOVIN Amelogenin, X isoform OS=Bos taurus OX=9913 GN=AMELX PE=1 SV=2	1	hf1_10472_ebo_30_1_261219.ScanId;v=1;d1=17383.17383.3	controllerType=0 controllerNumber=1 scan=17383	38.2248
18272:2	1	S.M[+15.995]PLPPHPGHPGY[+15.995]INFS[+79.966].Y		M[+16], S[+80], Y[+16]	936.916	2	1872.82	1872.81	0	5.5	17	Non	313.38	313.38	0	5.06	1703	>sp|P02817|AMELX_BOVIN Amelogenin, X isoform OS=Bos taurus OX=9913 GN=AMELX PE=1 SV=2	1	hf1_10472_ebo_30_1_261219.ScanId;v=1;d1=14803.14803.2	controllerType=0 controllerNumber=1 scan=14803	33.793
16840:2	1	S.M[+15.995]PLPPHPGHPGY[+15.995]INFS[+79.966].Y		M[+16], S[+80], Y[+16]	936.916	2	1872.83	1872.81	0	6	17	Non	322.56	322.56	0	5.23	1703	>sp|P02817|AMELX_BOVIN Amelogenin, X isoform OS=Bos taurus OX=9913 GN=AMELX PE=1 SV=2	1	hf1_10472_ebo_30_1_261219.ScanId;v=1;d1=13751.13751.2	controllerType=0 controllerNumber=1 scan=13751	31.9309
20954:2	1	S.M[+31.990]PLPPHPGHPGYIN[+0.984]FS[+79.966].Y		M[+32], N[+1], S[+80]	937.411	2	1873.81	1873.8	0	9.1	17	Non	340.73	279.85	5.53	4.63	1703	>sp|P02817|AMELX_BOVIN Amelogenin, X isoform OS=Bos taurus OX=9913 GN=AMELX PE=1 SV=2	1	hf1_10472_ebo_30_1_261219.ScanId;v=1;d1=16672.16672.2	controllerType=0 controllerNumber=1 scan=16672	37.007
21475:2	1	S.M[+15.995]PLPPHPGHPGYIN[+0.984]FS[+79.966].Y		M[+16], N[+1], S[+80]	929.41	2	1857.81	1857.8	0	5.8	17	Non	372.21	355.25	25.54	5.23	1703	>sp|P02817|AMELX_BOVIN Amelogenin, X isoform OS=Bos taurus OX=9913 GN=AMELX PE=1 SV=2	1	hf1_10472_ebo_30_1_261219.ScanId;v=1;d1=17024.17024.2	controllerType=0 controllerNumber=1 scan=17024	37.6134
17125:2	1	S.M[+15.995]PLPPHPGHPGY[+15.995]INFS[+79.966].Y		M[+16], S[+80], Y[+16]	936.919	2	1872.83	1872.81	0	8.6	17	Non	373.68	373.68	0	5.75	1703	>sp|P02817|AMELX_BOVIN Amelogenin, X isoform OS=Bos taurus OX=9913 GN=AMELX PE=1 SV=2	1	hf1_10472_ebo_30_1_261219.ScanId;v=1;d1=13950.13950.2	controllerType=0 controllerNumber=1 scan=13950	32.2775
17646:2	1	S.M[+15.995]PLPPHPGHPGY[+15.995]INFS[+79.966].Y		M[+16], S[+80], Y[+16]	936.918	2	1872.83	1872.81	0	8.4	17	Non	385.76	385.76	2.13	5.75	1703	>sp|P02817|AMELX_BOVIN Amelogenin, X isoform OS=Bos taurus OX=9913 GN=AMELX PE=1 SV=2	1	hf1_10472_ebo_30_1_261219.ScanId;v=1;d1=14339.14339.2	controllerType=0 controllerNumber=1 scan=14339	32.9717
20751:3	1	S.M[+15.995]PLPPHPGHPGYIN[+0.984]FS[+79.966].Y		M[+16], N[+1], S[+80]	619.943	3	1857.81	1857.8	0	5.8	17	Non	440.17	417.93	10.51	5.92	1703	>sp|P02817|AMELX_BOVIN Amelogenin, X isoform OS=Bos taurus OX=9913 GN=AMELX PE=1 SV=2	1	hf1_10472_ebo_30_1_261219.ScanId;v=1;d1=16530.16530.3	controllerType=0 controllerNumber=1 scan=16530	36.7659
21043:3	1	S.M[+15.995]PLPPHPGHPGYIN[+0.984]FS[+79.966].Y		M[+16], N[+1], S[+80]	619.943	3	1857.82	1857.8	0	6.9	17	Non	456.46	391.97	2.09	5.85	1703	>sp|P02817|AMELX_BOVIN Amelogenin, X isoform OS=Bos taurus OX=9913 GN=AMELX PE=1 SV=2	1	hf1_10472_ebo_30_1_261219.ScanId;v=1;d1=16731.16731.3	controllerType=0 controllerNumber=1 scan=16731	37.1128
21342:3	1	S.M[+15.995]PLPPHPGHPGYIN[+0.984]FS[+79.966].Y		M[+16], N[+1], S[+80]	619.943	3	1857.81	1857.8	0	5.7	17	Non	462.47	363.1	10.35	6.02	1703	>sp|P02817|AMELX_BOVIN Amelogenin, X isoform OS=Bos taurus OX=9913 GN=AMELX PE=1 SV=2	1	hf1_10472_ebo_30_1_261219.ScanId;v=1;d1=16933.16933.3	controllerType=0 controllerNumber=1 scan=16933	37.4569
20158:3	1	S.MP[+15.995]LPPHPGHPGYIN[+0.984]FS[+79.966].Y		N[+1], P[+16], S[+80]	619.943	3	1857.82	1857.8	0	7	17	Non	466.75	406.33	4	6.56	1703	>sp|P02817|AMELX_BOVIN Amelogenin, X isoform OS=Bos taurus OX=9913 GN=AMELX PE=1 SV=2	1	hf1_10472_ebo_30_1_261219.ScanId;v=1;d1=16123.16123.3	controllerType=0 controllerNumber=1 scan=16123	36.0704
20448:3	1	S.M[+15.995]PLPPHPGHPGYIN[+0.984]FS[+79.966].Y		M[+16], N[+1], S[+80]	619.942	3	1857.81	1857.8	0	5.4	17	Non	466.76	391.61	11	6.62	1703	>sp|P02817|AMELX_BOVIN Amelogenin, X isoform OS=Bos taurus OX=9913 GN=AMELX PE=1 SV=2	1	hf1_10472_ebo_30_1_261219.ScanId;v=1;d1=16325.16325.3	controllerType=0 controllerNumber=1 scan=16325	36.4126
19861:3	1	S.M[+15.995]PLPPHPGHPGYIN[+0.984]FS[+79.966].Y		M[+16], N[+1], S[+80]	619.944	3	1857.82	1857.8	0	8	17	Non	475.49	442.1	4.55	6.56	1703	>sp|P02817|AMELX_BOVIN Amelogenin, X isoform OS=Bos taurus OX=9913 GN=AMELX PE=1 SV=2	1	hf1_10472_ebo_30_1_261219.ScanId;v=1;d1=15922.15922.3	controllerType=0 controllerNumber=1 scan=15922	35.7315
21153:2	1	S.M[+15.995]PLPPHPGHPGYIN[+0.984]FS[+79.966].Y		M[+16], N[+1], S[+80]	929.412	2	1857.82	1857.8	0	7.8	17	Non	550.23	442.14	27.31	6.5	1703	>sp|P02817|AMELX_BOVIN Amelogenin, X isoform OS=Bos taurus OX=9913 GN=AMELX PE=1 SV=2	1	hf1_10472_ebo_30_1_261219.ScanId;v=1;d1=16808.16808.2	controllerType=0 controllerNumber=1 scan=16808	37.2486
20578:2	1	S.M[+15.995]PLPPHPGHPGYIN[+0.984]FS[+79.966].Y		M[+16], N[+1], S[+80]	929.411	2	1857.82	1857.8	0	6.6	17	Non	551.31	479.5	32.55	7.1	1703	>sp|P02817|AMELX_BOVIN Amelogenin, X isoform OS=Bos taurus OX=9913 GN=AMELX PE=1 SV=2	1	hf1_10472_ebo_30_1_261219.ScanId;v=1;d1=16412.16412.2	controllerType=0 controllerNumber=1 scan=16412	36.561
20870:2	1	S.M[+15.995]PLPPHPGHPGYIN[+0.984]FS[+79.966].Y		M[+16], N[+1], S[+80]	929.413	2	1857.82	1857.8	0	8.2	17	Non	554.48	486.45	31.43	6.4	1703	>sp|P02817|AMELX_BOVIN Amelogenin, X isoform OS=Bos taurus OX=9913 GN=AMELX PE=1 SV=2	1	hf1_10472_ebo_30_1_261219.ScanId;v=1;d1=16616.16616.2	controllerType=0 controllerNumber=1 scan=16616	36.9132
20285:2	1	S.M[+15.995]PLPPHPGHPGYIN[+0.984]FS[+79.966].Y		M[+16], N[+1], S[+80]	929.412	2	1857.82	1857.8	0	6.8	17	Non	565.43	496.68	29.74	7.88	1703	>sp|P02817|AMELX_BOVIN Amelogenin, X isoform OS=Bos taurus OX=9913 GN=AMELX PE=1 SV=2	1	hf1_10472_ebo_30_1_261219.ScanId;v=1;d1=16211.16211.2	controllerType=0 controllerNumber=1 scan=16211	36.2199
19669:2	1	S.M[+15.995]PLPPHPGHPGYIN[+0.984]FS[+79.966].Y		M[+16], N[+1], S[+80]	929.412	2	1857.82	1857.8	0	6.9	17	Non	573.54	510.69	47.95	7.88	1703	>sp|P02817|AMELX_BOVIN Amelogenin, X isoform OS=Bos taurus OX=9913 GN=AMELX PE=1 SV=2	1	hf1_10472_ebo_30_1_261219.ScanId;v=1;d1=15792.15792.2	controllerType=0 controllerNumber=1 scan=15792	35.5167
19975:2	1	S.M[+15.995]PLPPHPGHPGYIN[+0.984]FS[+79.966].Y		M[+16], N[+1], S[+80]	929.411	2	1857.81	1857.8	0	6.1	17	Non	580.08	496.23	40.71	7.94	1703	>sp|P02817|AMELX_BOVIN Amelogenin, X isoform OS=Bos taurus OX=9913 GN=AMELX PE=1 SV=2	1	hf1_10472_ebo_30_1_261219.ScanId;v=1;d1=16000.16000.2	controllerType=0 controllerNumber=1 scan=16000	35.8628
19662:3	1	S.M[+15.995]PLPPHPGHPGYINFSY.E		M[+16]	647.316	3	1939.93	1939.92	0	8.6	17	Non	273.08	7.38	0.27	1.77	1703	>sp|P02817|AMELX_BOVIN Amelogenin, X isoform OS=Bos taurus OX=9913 GN=AMELX PE=1 SV=2	1	hf1_10472_ebo_30_1_261219.ScanId;v=1;d1=15786.15786.3	controllerType=0 controllerNumber=1 scan=15786	35.5049
21719:2	1	S.M[+15.995]PLPPHPGHPGYINFS[+79.966]Y.E		M[+16], S[+80]	1010.45	2	2019.89	2019.88	0	4.3	17	Non	195.81	195.81	9.01	2.53	1703	>sp|P02817|AMELX_BOVIN Amelogenin, X isoform OS=Bos taurus OX=9913 GN=AMELX PE=1 SV=2	1	hf1_10472_ebo_30_1_261219.ScanId;v=1;d1=17190.17190.2	controllerType=0 controllerNumber=1 scan=17190	37.8922
20235:3	1	S.MP[+15.995]LPPHPGHPGYIN[+0.984]FSY.E		N[+1], P[+16]	647.643	3	1940.91	1940.9	0	6.8	17	Non	227.2	6.03	6.03	1.24	1703	>sp|P02817|AMELX_BOVIN Amelogenin, X isoform OS=Bos taurus OX=9913 GN=AMELX PE=1 SV=2	1	hf1_10472_ebo_30_1_261219.ScanId;v=1;d1=16174.16174.3	controllerType=0 controllerNumber=1 scan=16174	36.1546
21670:3	1	S.M[+15.995]PLPPHPGHPGYINFS[+79.966]Y.E		M[+16], S[+80]	673.97	3	2019.9	2019.88	0	6.4	17	Non	257.08	98.97	8.47	2.37	1703	>sp|P02817|AMELX_BOVIN Amelogenin, X isoform OS=Bos taurus OX=9913 GN=AMELX PE=1 SV=2	1	hf1_10472_ebo_30_1_261219.ScanId;v=1;d1=17157.17157.3	controllerType=0 controllerNumber=1 scan=17157	37.8358
22362:2	1	S.M[+15.995]PLPPHPGHPGYINFS[+79.966]Y.E		M[+16], S[+80]	1010.45	2	2019.9	2019.88	0	8.8	17	Non	266.96	266.96	5.36	4.44	1703	>sp|P02817|AMELX_BOVIN Amelogenin, X isoform OS=Bos taurus OX=9913 GN=AMELX PE=1 SV=2	1	hf1_10472_ebo_30_1_261219.ScanId;v=1;d1=17608.17608.2	controllerType=0 controllerNumber=1 scan=17608	38.6068
22910:3	1	S.M[+15.995]PLPPHPGHPGYINFS[+79.966]Y.E		M[+16], S[+80]	673.964	3	2019.88	2019.88	0	-3	17	Non	303.77	303.77	9.05	3.81	1703	>sp|P02817|AMELX_BOVIN Amelogenin, X isoform OS=Bos taurus OX=9913 GN=AMELX PE=1 SV=2	1	hf1_10472_ebo_30_1_261219.ScanId;v=1;d1=17971.17971.3	controllerType=0 controllerNumber=1 scan=17971	39.2254
21659:2	1	S.M[+15.995]PLPPHPGHPGYINFS[+79.966]Y.E		M[+16], S[+80]	1010.45	2	2019.89	2019.88	0	3.5	17	Non	321.36	321.36	22.09	4.63	1703	>sp|P02817|AMELX_BOVIN Amelogenin, X isoform OS=Bos taurus OX=9913 GN=AMELX PE=1 SV=2	1	hf1_10472_ebo_30_1_261219.ScanId;v=1;d1=17149.17149.2	controllerType=0 controllerNumber=1 scan=17149	37.8216
22585:3	1	S.M[+15.995]PLPPHPGHPGYINFS[+79.966]Y.E		M[+16], S[+80]	673.971	3	2019.9	2019.88	0	7.8	17	Non	356.78	184.57	14.33	4.18	1703	>sp|P02817|AMELX_BOVIN Amelogenin, X isoform OS=Bos taurus OX=9913 GN=AMELX PE=1 SV=2	1	hf1_10472_ebo_30_1_261219.ScanId;v=1;d1=17762.17762.3	controllerType=0 controllerNumber=1 scan=17762	38.8758
22706:2	1	S.M[+15.995]PLPPHPGHPGYINFS[+79.966]Y.E		M[+16], S[+80]	1010.45	2	2019.9	2019.88	0	9.5	17	Non	367.89	367.89	4.85	5.77	1703	>sp|P02817|AMELX_BOVIN Amelogenin, X isoform OS=Bos taurus OX=9913 GN=AMELX PE=1 SV=2	1	hf1_10472_ebo_30_1_261219.ScanId;v=1;d1=17841.17841.2	controllerType=0 controllerNumber=1 scan=17841	39.0075
21966:3	1	S.M[+15.995]PLPPHPGHPGYINFS[+79.966]Y.E		M[+16], S[+80]	673.97	3	2019.9	2019.88	0	7.1	17	Non	420.17	239.36	15.36	4.6	1703	>sp|P02817|AMELX_BOVIN Amelogenin, X isoform OS=Bos taurus OX=9913 GN=AMELX PE=1 SV=2	1	hf1_10472_ebo_30_1_261219.ScanId;v=1;d1=17352.17352.3	controllerType=0 controllerNumber=1 scan=17352	38.1761
22289:3	1	S.M[+15.995]PLPPHPGHPGYINFS[+79.966]Y.E		M[+16], S[+80]	673.97	3	2019.9	2019.88	0	7.1	17	Non	431.91	196.43	15.26	4.37	1703	>sp|P02817|AMELX_BOVIN Amelogenin, X isoform OS=Bos taurus OX=9913 GN=AMELX PE=1 SV=2	1	hf1_10472_ebo_30_1_261219.ScanId;v=1;d1=17562.17562.3	controllerType=0 controllerNumber=1 scan=17562	38.5305
22033:2	1	S.M[+15.995]PLPPHPGHPGYINFS[+79.966]Y.E		M[+16], S[+80]	1010.45	2	2019.9	2019.88	0	7.5	17	Non	523.14	523.14	25.69	6.5	1703	>sp|P02817|AMELX_BOVIN Amelogenin, X isoform OS=Bos taurus OX=9913 GN=AMELX PE=1 SV=2	1	hf1_10472_ebo_30_1_261219.ScanId;v=1;d1=17397.17397.2	controllerType=0 controllerNumber=1 scan=17397	38.2501
23364:2	1	S.MP[+15.995]LPPHPGHPGYIN[+0.984]FS[+79.966]Y.E		N[+1], P[+16], S[+80]	1010.95	2	2020.88	2020.87	0	8.6	17	Non	240.14	161.42	7.29	3.74	1703	>sp|P02817|AMELX_BOVIN Amelogenin, X isoform OS=Bos taurus OX=9913 GN=AMELX PE=1 SV=2	1	hf1_10472_ebo_30_1_261219.ScanId;v=1;d1=18268.18268.2	controllerType=0 controllerNumber=1 scan=18268	39.7256
23546:3	1	S.M[+15.995]PLPPHPGHPGYIN[+0.984]FS[+79.966]Y.E		M[+16], N[+1], S[+80]	674.295	3	2020.87	2020.87	0	2	17	Non	352.74	206.41	23.69	3.87	1703	>sp|P02817|AMELX_BOVIN Amelogenin, X isoform OS=Bos taurus OX=9913 GN=AMELX PE=1 SV=2	1	hf1_10472_ebo_30_1_261219.ScanId;v=1;d1=18387.18387.3	controllerType=0 controllerNumber=1 scan=18387	39.9219
23227:3	1	S.M[+15.995]PLPPHPGHPGYIN[+0.984]FS[+79.966]Y.E		M[+16], N[+1], S[+80]	674.298	3	2020.88	2020.87	0	6.5	17	Non	377.8	198.86	11.63	4.32	1703	>sp|P02817|AMELX_BOVIN Amelogenin, X isoform OS=Bos taurus OX=9913 GN=AMELX PE=1 SV=2	1	hf1_10472_ebo_30_1_261219.ScanId;v=1;d1=18174.18174.3	controllerType=0 controllerNumber=1 scan=18174	39.5699
18720:3	1	S.MP[+15.995]LPPHPGHPGYINFSYE.V		P[+16]	690.327	3	2068.97	2068.96	0	4.6	17	Non	268.93	257.62	4	4.4	1703	>sp|P02817|AMELX_BOVIN Amelogenin, X isoform OS=Bos taurus OX=9913 GN=AMELX PE=1 SV=2	1	hf1_10472_ebo_30_1_261219.ScanId;v=1;d1=15118.15118.3	controllerType=0 controllerNumber=1 scan=15118	34.3506
00165:3	1	S.MP[+15.995]LPPHPGHPGYINFS[+79.966]YE.V		P[+16], S[+80]	716.983	3	2148.93	2148.92	0	4.4	17	Non	83.63	83.63	4	1.3	1703	>sp|P02817|AMELX_BOVIN Amelogenin, X isoform OS=Bos taurus OX=9913 GN=AMELX PE=1 SV=2	1	hf1_10472_ebo_30_1_261219.ScanId;v=1;d1=175.175.3	controllerType=0 controllerNumber=1 scan=175	0.5598
18441:3	1	S.MP[+15.995]LPPHPGHPGYIN[+0.984]FSYE.V		N[+1], P[+16]	690.657	3	2069.96	2069.94	0	7.2	17	Non	162.22	162.22	4	1.39	1703	>sp|P02817|AMELX_BOVIN Amelogenin, X isoform OS=Bos taurus OX=9913 GN=AMELX PE=1 SV=2	1	hf1_10472_ebo_30_1_261219.ScanId;v=1;d1=14923.14923.3	controllerType=0 controllerNumber=1 scan=14923	34.0075
19487:3	1	S.MP[+15.995]LPPHPGHPGYIN[+0.984]FSYE.V		N[+1], P[+16]	690.657	3	2069.96	2069.94	0	7.2	17	Non	219.17	219.17	5.8	2.52	1703	>sp|P02817|AMELX_BOVIN Amelogenin, X isoform OS=Bos taurus OX=9913 GN=AMELX PE=1 SV=2	1	hf1_10472_ebo_30_1_261219.ScanId;v=1;d1=15664.15664.3	controllerType=0 controllerNumber=1 scan=15664	35.2928
21678:3	1	S.M[+15.995]PLPPHPGHPGYINFS[+79.966]YE.V		M[+16], S[+80]	716.983	3	2148.93	2148.92	0	4.5	17	Non	305.79	305.79	15.93	4.79	1703	>sp|P02817|AMELX_BOVIN Amelogenin, X isoform OS=Bos taurus OX=9913 GN=AMELX PE=1 SV=2	1	hf1_10472_ebo_30_1_261219.ScanId;v=1;d1=17163.17163.3	controllerType=0 controllerNumber=1 scan=17163	37.847
20475:3	1	S.M[+15.995]PLPPHPGHPGYINFS[+79.966]YE.V		M[+16], S[+80]	716.985	3	2148.94	2148.92	0	6.7	17	Non	308.16	308.16	5.06	4.72	1703	>sp|P02817|AMELX_BOVIN Amelogenin, X isoform OS=Bos taurus OX=9913 GN=AMELX PE=1 SV=2	1	hf1_10472_ebo_30_1_261219.ScanId;v=1;d1=16344.16344.3	controllerType=0 controllerNumber=1 scan=16344	36.4408
20585:2	1	S.M[+15.995]PLPPHPGHPGYINFS[+79.966]YE.V		M[+16], S[+80]	1074.97	2	2148.93	2148.92	0	3.9	17	Non	313.14	204.26	17.14	4.13	1703	>sp|P02817|AMELX_BOVIN Amelogenin, X isoform OS=Bos taurus OX=9913 GN=AMELX PE=1 SV=2	1	hf1_10472_ebo_30_1_261219.ScanId;v=1;d1=16417.16417.2	controllerType=0 controllerNumber=1 scan=16417	36.5686
21984:3	1	S.M[+15.995]PLPPHPGHPGYINFS[+79.966]YE.V		M[+16], S[+80]	716.979	3	2148.92	2148.92	0	-0.9	17	Non	342.18	342.18	11.3	4.08	1703	>sp|P02817|AMELX_BOVIN Amelogenin, X isoform OS=Bos taurus OX=9913 GN=AMELX PE=1 SV=2	1	hf1_10472_ebo_30_1_261219.ScanId;v=1;d1=17364.17364.3	controllerType=0 controllerNumber=1 scan=17364	38.1941
21371:3	1	S.M[+15.995]PLPPHPGHPGYINFS[+79.966]YE.V		M[+16], S[+80]	716.985	3	2148.94	2148.92	0	7.9	17	Non	389.64	389.64	19.41	5.83	1703	>sp|P02817|AMELX_BOVIN Amelogenin, X isoform OS=Bos taurus OX=9913 GN=AMELX PE=1 SV=2	1	hf1_10472_ebo_30_1_261219.ScanId;v=1;d1=16955.16955.3	controllerType=0 controllerNumber=1 scan=16955	37.4929
21508:2	1	S.M[+15.995]PLPPHPGHPGYINFS[+79.966]YE.V		M[+16], S[+80]	1074.97	2	2148.94	2148.92	0	5.7	17	Non	413.6	413.6	30.97	6.37	1703	>sp|P02817|AMELX_BOVIN Amelogenin, X isoform OS=Bos taurus OX=9913 GN=AMELX PE=1 SV=2	1	hf1_10472_ebo_30_1_261219.ScanId;v=1;d1=17044.17044.2	controllerType=0 controllerNumber=1 scan=17044	37.6463
20774:3	1	S.M[+15.995]PLPPHPGHPGYINFS[+79.966]YE.V		M[+16], S[+80]	716.985	3	2148.94	2148.92	0	7.8	17	Non	415.36	415.36	18.53	5.88	1703	>sp|P02817|AMELX_BOVIN Amelogenin, X isoform OS=Bos taurus OX=9913 GN=AMELX PE=1 SV=2	1	hf1_10472_ebo_30_1_261219.ScanId;v=1;d1=16548.16548.3	controllerType=0 controllerNumber=1 scan=16548	36.7959
21064:3	1	S.M[+15.995]PLPPHPGHPGYINFS[+79.966]YE.V		M[+16], S[+80]	716.984	3	2148.94	2148.92	0	6.3	17	Non	436.35	436.35	14.26	6.03	1703	>sp|P02817|AMELX_BOVIN Amelogenin, X isoform OS=Bos taurus OX=9913 GN=AMELX PE=1 SV=2	1	hf1_10472_ebo_30_1_261219.ScanId;v=1;d1=16749.16749.3	controllerType=0 controllerNumber=1 scan=16749	37.143
21187:2	1	S.M[+15.995]PLPPHPGHPGYINFS[+79.966]YE.V		M[+16], S[+80]	1074.98	2	2148.94	2148.92	0	8.7	17	Non	446.19	446.19	28.33	5.88	1703	>sp|P02817|AMELX_BOVIN Amelogenin, X isoform OS=Bos taurus OX=9913 GN=AMELX PE=1 SV=2	1	hf1_10472_ebo_30_1_261219.ScanId;v=1;d1=16832.16832.2	controllerType=0 controllerNumber=1 scan=16832	37.2884
20872:2	1	S.M[+15.995]PLPPHPGHPGYINFS[+79.966]YE.V		M[+16], S[+80]	1074.98	2	2148.94	2148.92	0	9.1	17	Non	551.49	551.49	39.18	6.76	1703	>sp|P02817|AMELX_BOVIN Amelogenin, X isoform OS=Bos taurus OX=9913 GN=AMELX PE=1 SV=2	1	hf1_10472_ebo_30_1_261219.ScanId;v=1;d1=16617.16617.2	controllerType=0 controllerNumber=1 scan=16617	36.9147
22110:3	1	S.M[+15.995]PLPPHPGHPGYIN[+0.984]FS[+79.966]YE.V		M[+16], N[+1], S[+80]	717.313	3	2149.93	2149.91	0	7.8	17	Non	254.53	254.53	24.66	4.34	1703	>sp|P02817|AMELX_BOVIN Amelogenin, X isoform OS=Bos taurus OX=9913 GN=AMELX PE=1 SV=2	1	hf1_10472_ebo_30_1_261219.ScanId;v=1;d1=17444.17444.6	controllerType=0 controllerNumber=1 scan=17444	38.3283
21679:3	1	S.M[+15.995]PLPPHPGHPGYIN[+0.984]FS[+79.966]YE.V		M[+16], N[+1], S[+80]	717.314	3	2149.93	2149.91	0	8.2	17	Non	284.94	284.94	28.53	4.72	1703	>sp|P02817|AMELX_BOVIN Amelogenin, X isoform OS=Bos taurus OX=9913 GN=AMELX PE=1 SV=2	1	hf1_10472_ebo_30_1_261219.ScanId;v=1;d1=17163.17163.3	controllerType=0 controllerNumber=1 scan=17163	37.847
22224:2	1	S.M[+15.995]PLPPHPGHPGYIN[+0.984]FS[+79.966]YE.V		M[+16], N[+1], S[+80]	1075.47	2	2149.92	2149.91	0	7.2	17	Non	316.55	291.13	22.91	5	1703	>sp|P02817|AMELX_BOVIN Amelogenin, X isoform OS=Bos taurus OX=9913 GN=AMELX PE=1 SV=2	1	hf1_10472_ebo_30_1_261219.ScanId;v=1;d1=17521.17521.2	controllerType=0 controllerNumber=1 scan=17521	38.4613
21807:2	1	S.M[+15.995]PLPPHPGHPGYIN[+0.984]FS[+79.966]YE.V		M[+16], N[+1], S[+80]	1075.47	2	2149.93	2149.91	0	8.8	17	Non	336.53	326.89	24.97	4.83	1703	>sp|P02817|AMELX_BOVIN Amelogenin, X isoform OS=Bos taurus OX=9913 GN=AMELX PE=1 SV=2	1	hf1_10472_ebo_30_1_261219.ScanId;v=1;d1=17254.17254.2	controllerType=0 controllerNumber=1 scan=17254	38.0069
21985:3	1	S.M[+15.995]PLPPHPGHPGYIN[+0.984]FS[+79.966]YE.V		M[+16], N[+1], S[+80]	717.313	3	2149.92	2149.91	0	6.7	17	Non	360.64	360.64	19.67	5.82	1703	>sp|P02817|AMELX_BOVIN Amelogenin, X isoform OS=Bos taurus OX=9913 GN=AMELX PE=1 SV=2	1	hf1_10472_ebo_30_1_261219.ScanId;v=1;d1=17364.17364.3	controllerType=0 controllerNumber=1 scan=17364	38.1941
23829:3	1	S.MP[+15.995]LPPHPGHPGYINFS[+79.966]YEV.L		P[+16], S[+80]	750.007	3	2248.01	2247.99	0	6.2	17	Non	201.29	201.29	4	2.56	1703	>sp|P02817|AMELX_BOVIN Amelogenin, X isoform OS=Bos taurus OX=9913 GN=AMELX PE=1 SV=2	1	hf1_10472_ebo_30_1_261219.ScanId;v=1;d1=18573.18573.3	controllerType=0 controllerNumber=1 scan=18573	40.2409
25907:3	1	S.MP[+15.995]LPPHPGHPGYINFSYEVL.T		P[+16]	761.04	3	2281.1	2281.11	0	-2.9	17	Non	248.07	237.14	4	2.71	1703	>sp|P02817|AMELX_BOVIN Amelogenin, X isoform OS=Bos taurus OX=9913 GN=AMELX PE=1 SV=2	1	hf1_10472_ebo_30_1_261219.ScanId;v=1;d1=19973.19973.3	controllerType=0 controllerNumber=1 scan=19973	42.5857
28997:3	1	S.MPLPPHPGHPGYINFS[+79.966]YEVL.T		S[+80]	782.371	3	2345.1	2345.08	0	7.3	17	Non	267.61	267.61	40.71	3.71	1703	>sp|P02817|AMELX_BOVIN Amelogenin, X isoform OS=Bos taurus OX=9913 GN=AMELX PE=1 SV=2	1	hf1_10472_ebo_30_1_261219.ScanId;v=1;d1=22042.22042.3	controllerType=0 controllerNumber=1 scan=22042	46.1677
25159:3	1	S.MP[+15.995]LPPHPGHPGYINFSYEVL.T		P[+16]	761.046	3	2281.12	2281.11	0	5.6	17	Non	273.17	270.03	4	4.4	1703	>sp|P02817|AMELX_BOVIN Amelogenin, X isoform OS=Bos taurus OX=9913 GN=AMELX PE=1 SV=2	1	hf1_10472_ebo_30_1_261219.ScanId;v=1;d1=19477.19477.3	controllerType=0 controllerNumber=1 scan=19477	41.7596
27736:3	1	S.MP[+15.995]LPPHPGHPGYINFS[+79.966]YEVL.T		P[+16], S[+80]	787.701	3	2361.09	2361.08	0	4.9	17	Non	278.1	278.1	4	4.4	1703	>sp|P02817|AMELX_BOVIN Amelogenin, X isoform OS=Bos taurus OX=9913 GN=AMELX PE=1 SV=2	1	hf1_10472_ebo_30_1_261219.ScanId;v=1;d1=21224.21224.3	controllerType=0 controllerNumber=1 scan=21224	44.7243
27158:3	1	S.MP[+15.995]LPPHPGHPGYINFS[+79.966]YEVL.T		P[+16], S[+80]	787.702	3	2361.09	2361.08	0	5.6	17	Non	279.66	279.66	4	4.57	1703	>sp|P02817|AMELX_BOVIN Amelogenin, X isoform OS=Bos taurus OX=9913 GN=AMELX PE=1 SV=2	1	hf1_10472_ebo_30_1_261219.ScanId;v=1;d1=20825.20825.3	controllerType=0 controllerNumber=1 scan=20825	44.0372
27450:3	1	S.MP[+15.995]LPPHPGHPGYINFS[+79.966]YEVL.T		P[+16], S[+80]	787.702	3	2361.09	2361.08	0	6.3	17	Non	291.44	291.44	4	4.79	1703	>sp|P02817|AMELX_BOVIN Amelogenin, X isoform OS=Bos taurus OX=9913 GN=AMELX PE=1 SV=2	1	hf1_10472_ebo_30_1_261219.ScanId;v=1;d1=21027.21027.3	controllerType=0 controllerNumber=1 scan=21027	44.38
27565:2	1	S.M[+15.995]PLPPHPGHPGYINFS[+79.966]YEVL.T		M[+16], S[+80]	1181.05	2	2361.1	2361.08	0	9.7	17	Non	318.63	318.63	7.89	4.49	1703	>sp|P02817|AMELX_BOVIN Amelogenin, X isoform OS=Bos taurus OX=9913 GN=AMELX PE=1 SV=2	1	hf1_10472_ebo_30_1_261219.ScanId;v=1;d1=21107.21107.2	controllerType=0 controllerNumber=1 scan=21107	44.5203
26953:2	1	S.M[+15.995]PLPPHPGHPGYINFS[+79.966]YEVL.T		M[+16], S[+80]	1181.05	2	2361.1	2361.08	0	7.8	17	Non	493.28	493.28	12.62	6.39	1703	>sp|P02817|AMELX_BOVIN Amelogenin, X isoform OS=Bos taurus OX=9913 GN=AMELX PE=1 SV=2	1	hf1_10472_ebo_30_1_261219.ScanId;v=1;d1=20691.20691.2	controllerType=0 controllerNumber=1 scan=20691	43.8098
27268:2	1	S.M[+15.995]PLPPHPGHPGYINFS[+79.966]YEVL.T		M[+16], S[+80]	1181.05	2	2361.09	2361.08	0	6.2	17	Non	507.06	507.06	15.68	6.31	1703	>sp|P02817|AMELX_BOVIN Amelogenin, X isoform OS=Bos taurus OX=9913 GN=AMELX PE=1 SV=2	1	hf1_10472_ebo_30_1_261219.ScanId;v=1;d1=20903.20903.2	controllerType=0 controllerNumber=1 scan=20903	44.1691
28033:3	1	S.MP[+15.995]LPPHPGHPGYIN[+0.984]FS[+79.966]YEVL.T		N[+1], P[+16], S[+80]	788.03	3	2362.08	2362.06	0	6.6	17	Non	229.73	229.73	4	2.52	1703	>sp|P02817|AMELX_BOVIN Amelogenin, X isoform OS=Bos taurus OX=9913 GN=AMELX PE=1 SV=2	1	hf1_10472_ebo_30_1_261219.ScanId;v=1;d1=21425.21425.3	controllerType=0 controllerNumber=1 scan=21425	45.0754
28178:2	1	S.M[+15.995]PLPPHPGHPGYIN[+0.984]FS[+79.966]YEVL.T		M[+16], N[+1], S[+80]	1181.54	2	2362.08	2362.06	0	8.3	17	Non	370.43	370.43	18.22	5.75	1703	>sp|P02817|AMELX_BOVIN Amelogenin, X isoform OS=Bos taurus OX=9913 GN=AMELX PE=1 SV=2	1	hf1_10472_ebo_30_1_261219.ScanId;v=1;d1=21518.21518.2	controllerType=0 controllerNumber=1 scan=21518	45.2342
27865:2	1	S.MP[+15.995]LPPHPGHPGYIN[+0.984]FS[+79.966]YEVL.T		N[+1], P[+16], S[+80]	1181.54	2	2362.08	2362.06	0	8	17	Non	375.81	375.81	10.29	6.11	1703	>sp|P02817|AMELX_BOVIN Amelogenin, X isoform OS=Bos taurus OX=9913 GN=AMELX PE=1 SV=2	1	hf1_10472_ebo_30_1_261219.ScanId;v=1;d1=21311.21311.2	controllerType=0 controllerNumber=1 scan=21311	44.8717
25723:3	1	S.M[+15.995]PLPPHPGHPGYINFS[+79.966]YEVLT.P		M[+16], S[+80]	821.385	3	2462.14	2462.12	0	5.9	17	Non	192.87	192.87	6.28	2.4	1703	>sp|P02817|AMELX_BOVIN Amelogenin, X isoform OS=Bos taurus OX=9913 GN=AMELX PE=1 SV=2	1	hf1_10472_ebo_30_1_261219.ScanId;v=1;d1=19849.19849.3	controllerType=0 controllerNumber=1 scan=19849	42.3844
30434:2	1	S.MP[+15.995]LPPHPGHPGYINFS[+79.966]YEVLTP.L		P[+16], S[+80]	1280.1	2	2559.2	2559.18	0	9.7	17	Non	224.21	224.21	12.31	2.66	1703	>sp|P02817|AMELX_BOVIN Amelogenin, X isoform OS=Bos taurus OX=9913 GN=AMELX PE=1 SV=2	1	hf1_10472_ebo_30_1_261219.ScanId;v=1;d1=22980.22980.4	controllerType=0 controllerNumber=1 scan=22980	47.8874
26946:3	1	S.MP[+15.995]LPPHPGHPGYINFS[+79.966]YEVLTP.L		P[+16], S[+80]	853.736	3	2559.19	2559.18	0	6.5	17	Non	233.39	233.39	16.22	3.22	1703	>sp|P02817|AMELX_BOVIN Amelogenin, X isoform OS=Bos taurus OX=9913 GN=AMELX PE=1 SV=2	1	hf1_10472_ebo_30_1_261219.ScanId;v=1;d1=20687.20687.3	controllerType=0 controllerNumber=1 scan=20687	43.8038
32166:4	1	S.MPLPPHPGHPGYINFS[+79.966]YEVLTPL.K		S[+80]	664.826	4	2656.28	2656.27	0	6	17	Non	186.2	186.2	55.07	2.31	1703	>sp|P02817|AMELX_BOVIN Amelogenin, X isoform OS=Bos taurus OX=9913 GN=AMELX PE=1 SV=2	1	hf1_10472_ebo_30_1_261219.ScanId;v=1;d1=24163.24163.4	controllerType=0 controllerNumber=1 scan=24163	50.0285
25932:4	1	S.M[+15.995]PLPPHPGHPGYINFSYEVLTPL.K		M[+16]	648.833	4	2592.31	2592.3	0	5.5	17	Non	216.83	174.98	5.18	2.31	1703	>sp|P02817|AMELX_BOVIN Amelogenin, X isoform OS=Bos taurus OX=9913 GN=AMELX PE=1 SV=2	1	hf1_10472_ebo_30_1_261219.ScanId;v=1;d1=19989.19989.4	controllerType=0 controllerNumber=1 scan=19989	42.615
33457:3	1	S.MPLPPHPGHPGYINFS[+79.966]YEVLTPL.K		S[+80]	886.093	3	2656.27	2656.27	0	-0.4	17	Non	251.63	251.63	21.63	2.51	1703	>sp|P02817|AMELX_BOVIN Amelogenin, X isoform OS=Bos taurus OX=9913 GN=AMELX PE=1 SV=2	1	hf1_10472_ebo_30_1_261219.ScanId;v=1;d1=25039.25039.6	controllerType=0 controllerNumber=1 scan=25039	51.6236
28533:4	1	S.MP[+15.995]LPPHPGHPGYINFSYEVLTPL.K		P[+16]	648.834	4	2592.31	2592.3	0	7	17	Non	252.57	252.57	4	4.05	1703	>sp|P02817|AMELX_BOVIN Amelogenin, X isoform OS=Bos taurus OX=9913 GN=AMELX PE=1 SV=2	1	hf1_10472_ebo_30_1_261219.ScanId;v=1;d1=21748.21748.2	controllerType=0 controllerNumber=1 scan=21748	45.634
32267:3	1	S.MPLPPHPGHPGYINFS[+79.966]YEVLTPL.K		S[+80]	886.099	3	2656.28	2656.27	0	5.5	17	Non	273.31	273.31	58.05	4.69	1703	>sp|P02817|AMELX_BOVIN Amelogenin, X isoform OS=Bos taurus OX=9913 GN=AMELX PE=1 SV=2	1	hf1_10472_ebo_30_1_261219.ScanId;v=1;d1=24234.24234.3	controllerType=0 controllerNumber=1 scan=24234	50.1614
31857:3	1	S.MPLPPHPGHPGYINFS[+79.966]YEVLTPL.K		S[+80]	886.1	3	2656.29	2656.27	0	7	17	Non	343.62	343.62	79.02	5.18	1703	>sp|P02817|AMELX_BOVIN Amelogenin, X isoform OS=Bos taurus OX=9913 GN=AMELX PE=1 SV=2	1	hf1_10472_ebo_30_1_261219.ScanId;v=1;d1=23956.23956.3	controllerType=0 controllerNumber=1 scan=23956	49.6656
28123:3	1	S.MP[+15.995]LPPHPGHPGYINFSYEVLTPL.K		P[+16]	864.777	3	2592.32	2592.3	0	7.6	17	Non	351.71	337.74	4	5.01	1703	>sp|P02817|AMELX_BOVIN Amelogenin, X isoform OS=Bos taurus OX=9913 GN=AMELX PE=1 SV=2	1	hf1_10472_ebo_30_1_261219.ScanId;v=1;d1=21484.21484.5	controllerType=0 controllerNumber=1 scan=21484	45.1758
28751:3	1	S.MP[+15.995]LPPHPGHPGYINFSYEVLTPL.K		P[+16]	864.775	3	2592.31	2592.3	0	5.7	17	Non	427.37	390.7	4	6.24	1703	>sp|P02817|AMELX_BOVIN Amelogenin, X isoform OS=Bos taurus OX=9913 GN=AMELX PE=1 SV=2	1	hf1_10472_ebo_30_1_261219.ScanId;v=1;d1=21889.21889.3	controllerType=0 controllerNumber=1 scan=21889	45.8833
28442:3	1	S.MP[+15.995]LPPHPGHPGYINFSYEVLTPL.K		P[+16]	864.776	3	2592.31	2592.3	0	6.8	17	Non	431.69	429.55	4	6.32	1703	>sp|P02817|AMELX_BOVIN Amelogenin, X isoform OS=Bos taurus OX=9913 GN=AMELX PE=1 SV=2	1	hf1_10472_ebo_30_1_261219.ScanId;v=1;d1=21691.21691.3	controllerType=0 controllerNumber=1 scan=21691	45.536
47377:3	1	S.MP[+15.995]LPPHPGHPGYINFS[+79.966]YEVLTPL.K		P[+16], S[+80]	891.43	3	2672.27	2672.26	0	4.8	17	Non	46.03	46.03	4	2.3	1703	>sp|P02817|AMELX_BOVIN Amelogenin, X isoform OS=Bos taurus OX=9913 GN=AMELX PE=1 SV=2	1	hf1_10472_ebo_30_1_261219.ScanId;v=1;d1=34342.34342.3	controllerType=0 controllerNumber=1 scan=34342	69.1341
47717:3	1	S.MP[+15.995]LPPHPGHPGYINFS[+79.966]YEVLTPL.K		P[+16], S[+80]	891.43	3	2672.28	2672.26	0	4.9	17	Non	83.8	83.8	4	2.34	1703	>sp|P02817|AMELX_BOVIN Amelogenin, X isoform OS=Bos taurus OX=9913 GN=AMELX PE=1 SV=2	1	hf1_10472_ebo_30_1_261219.ScanId;v=1;d1=34592.34592.3	controllerType=0 controllerNumber=1 scan=34592	69.6499
44924:3	1	S.MP[+15.995]LPPHPGHPGYINFS[+79.966]YEVLTPL.K		P[+16], S[+80]	891.425	3	2672.26	2672.26	0	-0.7	17	Non	90.42	90.42	4	1.32	1703	>sp|P02817|AMELX_BOVIN Amelogenin, X isoform OS=Bos taurus OX=9913 GN=AMELX PE=1 SV=2	1	hf1_10472_ebo_30_1_261219.ScanId;v=1;d1=32440.32440.3	controllerType=0 controllerNumber=1 scan=32440	64.9795
44388:3	1	S.MP[+15.995]LPPHPGHPGYINFS[+79.966]YEVLTPL.K		P[+16], S[+80]	891.432	3	2672.28	2672.26	0	6.7	17	Non	105.29	105.29	4	1.39	1703	>sp|P02817|AMELX_BOVIN Amelogenin, X isoform OS=Bos taurus OX=9913 GN=AMELX PE=1 SV=2	1	hf1_10472_ebo_30_1_261219.ScanId;v=1;d1=32068.32068.3	controllerType=0 controllerNumber=1 scan=32068	64.2858
43061:3	1	S.MP[+15.995]LPPHPGHPGYINFS[+79.966]YEVLTPL.K		P[+16], S[+80]	891.431	3	2672.28	2672.26	0	6.4	17	Non	121.61	121.61	4	1.8	1703	>sp|P02817|AMELX_BOVIN Amelogenin, X isoform OS=Bos taurus OX=9913 GN=AMELX PE=1 SV=2	1	hf1_10472_ebo_30_1_261219.ScanId;v=1;d1=31237.31237.3	controllerType=0 controllerNumber=1 scan=31237	62.8042
49658:3	1	S.MP[+15.995]LPPHPGHPGYINFS[+79.966]YEVLTPL.K		P[+16], S[+80]	891.429	3	2672.27	2672.26	0	3.9	17	Non	132.59	132.59	4	2.28	1703	>sp|P02817|AMELX_BOVIN Amelogenin, X isoform OS=Bos taurus OX=9913 GN=AMELX PE=1 SV=2	1	hf1_10472_ebo_30_1_261219.ScanId;v=1;d1=36045.36045.3	controllerType=0 controllerNumber=1 scan=36045	72.7659
43382:3	1	S.MP[+15.995]LPPHPGHPGYINFS[+79.966]YEVLTPL.K		P[+16], S[+80]	891.432	3	2672.28	2672.26	0	7.4	17	Non	148.23	148.23	4	1.8	1703	>sp|P02817|AMELX_BOVIN Amelogenin, X isoform OS=Bos taurus OX=9913 GN=AMELX PE=1 SV=2	1	hf1_10472_ebo_30_1_261219.ScanId;v=1;d1=31433.31433.3	controllerType=0 controllerNumber=1 scan=31433	63.1545
42442:3	1	S.MP[+15.995]LPPHPGHPGYINFS[+79.966]YEVLTPL.K		P[+16], S[+80]	891.427	3	2672.27	2672.26	0	2	17	Non	148.53	148.53	0.32	1.28	1703	>sp|P02817|AMELX_BOVIN Amelogenin, X isoform OS=Bos taurus OX=9913 GN=AMELX PE=1 SV=2	1	hf1_10472_ebo_30_1_261219.ScanId;v=1;d1=30844.30844.3	controllerType=0 controllerNumber=1 scan=30844	62.1031
45329:3	1	S.MP[+15.995]LPPHPGHPGYINFS[+79.966]YEVLTPL.K		P[+16], S[+80]	891.431	3	2672.28	2672.26	0	5.7	17	Non	157.18	157.18	4	2.49	1703	>sp|P02817|AMELX_BOVIN Amelogenin, X isoform OS=Bos taurus OX=9913 GN=AMELX PE=1 SV=2	1	hf1_10472_ebo_30_1_261219.ScanId;v=1;d1=32770.32770.3	controllerType=0 controllerNumber=1 scan=32770	65.6675
45679:3	1	S.MP[+15.995]LPPHPGHPGYINFS[+79.966]YEVLTPL.K		P[+16], S[+80]	891.43	3	2672.28	2672.26	0	5	17	Non	157.24	157.24	4	2.49	1703	>sp|P02817|AMELX_BOVIN Amelogenin, X isoform OS=Bos taurus OX=9913 GN=AMELX PE=1 SV=2	1	hf1_10472_ebo_30_1_261219.ScanId;v=1;d1=33077.33077.3	controllerType=0 controllerNumber=1 scan=33077	66.3937
44690:3	1	S.MP[+15.995]LPPHPGHPGYINFS[+79.966]YEVLTPL.K		P[+16], S[+80]	891.431	3	2672.28	2672.26	0	6.1	17	Non	162.54	162.54	4	2.99	1703	>sp|P02817|AMELX_BOVIN Amelogenin, X isoform OS=Bos taurus OX=9913 GN=AMELX PE=1 SV=2	1	hf1_10472_ebo_30_1_261219.ScanId;v=1;d1=32266.32266.3	controllerType=0 controllerNumber=1 scan=32266	64.6359
31149:4	1	S.MP[+15.995]LPPHPGHPGYINFS[+79.966]YEVLTPL.K		P[+16], S[+80]	668.82	4	2672.26	2672.26	0	-1.8	17	Non	185.77	185.77	4	1.33	1703	>sp|P02817|AMELX_BOVIN Amelogenin, X isoform OS=Bos taurus OX=9913 GN=AMELX PE=1 SV=2	1	hf1_10472_ebo_30_1_261219.ScanId;v=1;d1=23464.23464.4	controllerType=0 controllerNumber=1 scan=23464	48.7757
34171:3	1	S.MP[+15.995]LPPHPGHPGYINFS[+79.966]YEVLTPL.K		P[+16], S[+80]	891.429	3	2672.27	2672.26	0	4.2	17	Non	190.15	190.15	4	1.84	1703	>sp|P02817|AMELX_BOVIN Amelogenin, X isoform OS=Bos taurus OX=9913 GN=AMELX PE=1 SV=2	1	hf1_10472_ebo_30_1_261219.ScanId;v=1;d1=25512.25512.3	controllerType=0 controllerNumber=1 scan=25512	52.4883
30055:3	1	S.MP[+15.995]LPPHPGHPGYINFS[+79.966]YEVLTPL.K		P[+16], S[+80]	891.431	3	2672.28	2672.26	0	5.7	17	Non	203.07	203.07	4	2.75	1703	>sp|P02817|AMELX_BOVIN Amelogenin, X isoform OS=Bos taurus OX=9913 GN=AMELX PE=1 SV=2	1	hf1_10472_ebo_30_1_261219.ScanId;v=1;d1=22736.22736.3	controllerType=0 controllerNumber=1 scan=22736	47.4456
33186:3	1	S.MPLPPHPGHPGYIN[+0.984]FS[+79.966]YEVLTPL.K		N[+1], S[+80]	886.427	3	2657.27	2657.25	0	6.1	17	Non	217.82	217.82	78.19	2.75	1703	>sp|P02817|AMELX_BOVIN Amelogenin, X isoform OS=Bos taurus OX=9913 GN=AMELX PE=1 SV=2	1	hf1_10472_ebo_30_1_261219.ScanId;v=1;d1=24851.24851.3	controllerType=0 controllerNumber=1 scan=24851	51.2672
30000:4	1	S.MP[+15.995]LPPHPGHPGYINFS[+79.966]YEVLTPL.K		P[+16], S[+80]	668.824	4	2672.28	2672.26	0	5.4	17	Non	237.08	237.08	4	2.79	1703	>sp|P02817|AMELX_BOVIN Amelogenin, X isoform OS=Bos taurus OX=9913 GN=AMELX PE=1 SV=2	1	hf1_10472_ebo_30_1_261219.ScanId;v=1;d1=22697.22697.4	controllerType=0 controllerNumber=1 scan=22697	47.3698
30588:4	1	S.MP[+15.995]LPPHPGHPGYINFS[+79.966]YEVLTPL.K		P[+16], S[+80]	668.824	4	2672.28	2672.26	0	5.2	17	Non	262.27	262.27	4	4.12	1703	>sp|P02817|AMELX_BOVIN Amelogenin, X isoform OS=Bos taurus OX=9913 GN=AMELX PE=1 SV=2	1	hf1_10472_ebo_30_1_261219.ScanId;v=1;d1=23082.23082.4	controllerType=0 controllerNumber=1 scan=23082	48.0693
50112:3	1	S.MP[+15.995]LPPHPGHPGYINFS[+79.966]YEVLTPL.K		P[+16], S[+80]	891.43	3	2672.28	2672.26	0	5.2	17	Non	263.45	263.45	4	4.86	1703	>sp|P02817|AMELX_BOVIN Amelogenin, X isoform OS=Bos taurus OX=9913 GN=AMELX PE=1 SV=2	1	hf1_10472_ebo_30_1_261219.ScanId;v=1;d1=36375.36375.3	controllerType=0 controllerNumber=1 scan=36375	73.4616
32472:3	1	S.MP[+15.995]LPPHPGHPGYINFS[+79.966]YEVLTPL.K		P[+16], S[+80]	891.428	3	2672.27	2672.26	0	3	17	Non	268.29	268.29	5.8	4.08	1703	>sp|P02817|AMELX_BOVIN Amelogenin, X isoform OS=Bos taurus OX=9913 GN=AMELX PE=1 SV=2	1	hf1_10472_ebo_30_1_261219.ScanId;v=1;d1=24371.24371.3	controllerType=0 controllerNumber=1 scan=24371	50.4029
30288:4	1	S.MP[+15.995]LPPHPGHPGYINFS[+79.966]YEVLTPL.K		P[+16], S[+80]	668.824	4	2672.28	2672.26	0	5.2	17	Non	287.2	287.2	4	4.34	1703	>sp|P02817|AMELX_BOVIN Amelogenin, X isoform OS=Bos taurus OX=9913 GN=AMELX PE=1 SV=2	1	hf1_10472_ebo_30_1_261219.ScanId;v=1;d1=22885.22885.4	controllerType=0 controllerNumber=1 scan=22885	47.7124
29977:3	1	S.MP[+15.995]LPPHPGHPGYINFS[+79.966]YEVLTPL.K		P[+16], S[+80]	891.43	3	2672.28	2672.26	0	5.1	17	Non	324.29	324.29	4	5.25	1703	>sp|P02817|AMELX_BOVIN Amelogenin, X isoform OS=Bos taurus OX=9913 GN=AMELX PE=1 SV=2	1	hf1_10472_ebo_30_1_261219.ScanId;v=1;d1=22683.22683.3	controllerType=0 controllerNumber=1 scan=22683	47.3458
30440:3	1	S.MP[+15.995]LPPHPGHPGYINFS[+79.966]YEVLTPL.K		P[+16], S[+80]	891.43	3	2672.28	2672.26	0	5.2	17	Non	336.55	336.55	4	5.25	1703	>sp|P02817|AMELX_BOVIN Amelogenin, X isoform OS=Bos taurus OX=9913 GN=AMELX PE=1 SV=2	1	hf1_10472_ebo_30_1_261219.ScanId;v=1;d1=22983.22983.3	controllerType=0 controllerNumber=1 scan=22983	47.8915
30736:3	1	S.MP[+15.995]LPPHPGHPGYINFS[+79.966]YEVLTPL.K		P[+16], S[+80]	891.429	3	2672.27	2672.26	0	3.6	17	Non	342.17	342.17	4	4.63	1703	>sp|P02817|AMELX_BOVIN Amelogenin, X isoform OS=Bos taurus OX=9913 GN=AMELX PE=1 SV=2	1	hf1_10472_ebo_30_1_261219.ScanId;v=1;d1=23180.23180.3	controllerType=0 controllerNumber=1 scan=23180	48.2454
29193:3	1	S.MP[+15.995]LPPHPGHPGYIN[+0.984]FSYEVLTPL.K		N[+1], P[+16]	865.103	3	2593.29	2593.28	0	5.6	17	Non	398.93	312.52	4	5.19	1703	>sp|P02817|AMELX_BOVIN Amelogenin, X isoform OS=Bos taurus OX=9913 GN=AMELX PE=1 SV=2	1	hf1_10472_ebo_30_1_261219.ScanId;v=1;d1=22164.22164.3	controllerType=0 controllerNumber=1 scan=22164	46.3984
30266:2	1	S.MP[+15.995]LPPHPGHPGYINFS[+79.966]YEVLTPL.K		P[+16], S[+80]	1336.64	2	2672.28	2672.26	0	7.3	17	Non	444.12	444.12	4	6.52	1703	>sp|P02817|AMELX_BOVIN Amelogenin, X isoform OS=Bos taurus OX=9913 GN=AMELX PE=1 SV=2	1	hf1_10472_ebo_30_1_261219.ScanId;v=1;d1=22868.22868.2	controllerType=0 controllerNumber=1 scan=22868	47.681
30552:2	1	S.M[+15.995]PLPPHPGHPGYINFS[+79.966]YEVLTPL.K		M[+16], S[+80]	1336.64	2	2672.28	2672.26	0	6.9	17	Non	477.18	477.18	18.78	6.52	1703	>sp|P02817|AMELX_BOVIN Amelogenin, X isoform OS=Bos taurus OX=9913 GN=AMELX PE=1 SV=2	1	hf1_10472_ebo_30_1_261219.ScanId;v=1;d1=23057.23057.2	controllerType=0 controllerNumber=1 scan=23057	48.0258
48795:3	1	S.MP[+15.995]LPPHPGHPGYIN[+0.984]FS[+79.966]YEVLTPL.K		N[+1], P[+16], S[+80]	891.761	3	2673.27	2673.25	0	8.9	17	Non	10.6	10.6	4	1.41	1703	>sp|P02817|AMELX_BOVIN Amelogenin, X isoform OS=Bos taurus OX=9913 GN=AMELX PE=1 SV=2	1	hf1_10472_ebo_30_1_261219.ScanId;v=1;d1=35407.35407.3	controllerType=0 controllerNumber=1 scan=35407	71.3814
30878:4	1	S.MP[+15.995]LPPHPGHPGYIN[+0.984]FS[+79.966]YEVLTPL.K		N[+1], P[+16], S[+80]	669.072	4	2673.27	2673.25	0	7.8	17	Non	167.16	167.16	4	2.29	1703	>sp|P02817|AMELX_BOVIN Amelogenin, X isoform OS=Bos taurus OX=9913 GN=AMELX PE=1 SV=2	1	hf1_10472_ebo_30_1_261219.ScanId;v=1;d1=23278.23278.4	controllerType=0 controllerNumber=1 scan=23278	48.4215
30733:3	1	S.M[+31.990]PLPPHPGHPGYIN[+0.984]FS[+79.966]YEVLTPL.K		M[+32], N[+1], S[+80]	897.094	3	2689.27	2689.24	0	9.9	17	Non	217.78	217.78	0	1.66	1703	>sp|P02817|AMELX_BOVIN Amelogenin, X isoform OS=Bos taurus OX=9913 GN=AMELX PE=1 SV=2	1	hf1_10472_ebo_30_1_261219.ScanId;v=1;d1=23177.23177.3	controllerType=0 controllerNumber=1 scan=23177	48.238
29500:3	1	S.MP[+15.995]LPPHPGHP[+15.995]GYINFS[+79.966]YEVLTPL.K		P[+16]*2, S[+80]	896.76	3	2688.27	2688.26	0	3.2	17	Non	225.37	225.37	3.34	1.44	1703	>sp|P02817|AMELX_BOVIN Amelogenin, X isoform OS=Bos taurus OX=9913 GN=AMELX PE=1 SV=2	1	hf1_10472_ebo_30_1_261219.ScanId;v=1;d1=22367.22367.3	controllerType=0 controllerNumber=1 scan=22367	46.7731
31042:3	1	S.MP[+15.995]LPPHPGHP[+15.995]GYINFS[+79.966]YEVLTPL.K		P[+16]*2, S[+80]	896.761	3	2688.27	2688.26	0	4.4	17	Non	231.52	231.52	4	2.75	1703	>sp|P02817|AMELX_BOVIN Amelogenin, X isoform OS=Bos taurus OX=9913 GN=AMELX PE=1 SV=2	1	hf1_10472_ebo_30_1_261219.ScanId;v=1;d1=23389.23389.3	controllerType=0 controllerNumber=1 scan=23389	48.6341
33330:3	1	S.MP[+15.995]LPPHPGHPGYIN[+0.984]FS[+79.966]YEVLTPL.K		N[+1], P[+16], S[+80]	891.761	3	2673.27	2673.25	0	8.5	17	Non	243.12	217.69	4	3.47	1703	>sp|P02817|AMELX_BOVIN Amelogenin, X isoform OS=Bos taurus OX=9913 GN=AMELX PE=1 SV=2	1	hf1_10472_ebo_30_1_261219.ScanId;v=1;d1=24949.24949.6	controllerType=0 controllerNumber=1 scan=24949	51.4479
31369:2	1	S.M[+15.995]PLPPHPGHPGYIN[+0.984]FS[+79.966]YEVLTPL.K		M[+16], N[+1], S[+80]	1337.14	2	2673.27	2673.25	0	8.5	17	Non	293.34	246.48	8.08	4.83	1703	>sp|P02817|AMELX_BOVIN Amelogenin, X isoform OS=Bos taurus OX=9913 GN=AMELX PE=1 SV=2	1	hf1_10472_ebo_30_1_261219.ScanId;v=1;d1=23623.23623.2	controllerType=0 controllerNumber=1 scan=23623	49.0776
31006:3	1	S.MP[+15.995]LPPHPGHPGYIN[+0.984]FS[+79.966]YEVLTPL.K		N[+1], P[+16], S[+80]	891.758	3	2673.26	2673.25	0	5.4	17	Non	345.02	345.02	4	5.26	1703	>sp|P02817|AMELX_BOVIN Amelogenin, X isoform OS=Bos taurus OX=9913 GN=AMELX PE=1 SV=2	1	hf1_10472_ebo_30_1_261219.ScanId;v=1;d1=23362.23362.3	controllerType=0 controllerNumber=1 scan=23362	48.5821
31261:3	1	S.MP[+15.995]LPPHPGHPGYIN[+0.984]FS[+79.966]YEVLTPL.K		N[+1], P[+16], S[+80]	891.759	3	2673.26	2673.25	0	6	17	Non	352.83	351.88	4	5.25	1703	>sp|P02817|AMELX_BOVIN Amelogenin, X isoform OS=Bos taurus OX=9913 GN=AMELX PE=1 SV=2	1	hf1_10472_ebo_30_1_261219.ScanId;v=1;d1=23546.23546.3	controllerType=0 controllerNumber=1 scan=23546	48.9335
31107:2	1	S.M[+15.995]PLPPHPGHPGYIN[+0.984]FS[+79.966]YEVLTPL.K		M[+16], N[+1], S[+80]	1337.14	2	2673.27	2673.25	0	8.3	17	Non	368.25	293.5	19.42	5.04	1703	>sp|P02817|AMELX_BOVIN Amelogenin, X isoform OS=Bos taurus OX=9913 GN=AMELX PE=1 SV=2	1	hf1_10472_ebo_30_1_261219.ScanId;v=1;d1=23433.23433.2	controllerType=0 controllerNumber=1 scan=23433	48.7204
46511:3	1	S.MP[+15.995]LPPHPGHP[+31.990]GY[+31.990]INFSY[+15.995]EVLTPL.K		P[+16][+32], Y[+16][+32]	891.429	3	2672.27	2672.27	0	1.5	17	Non	88.43	88.43	0	1.5	1703	>sp|P02817|AMELX_BOVIN Amelogenin, X isoform OS=Bos taurus OX=9913 GN=AMELX PE=1 SV=2	1	hf1_10472_ebo_30_1_261219.ScanId;v=1;d1=33716.33716.3	controllerType=0 controllerNumber=1 scan=33716	67.7553
45136:3	1	S.MP[+15.995]LPPHPGHP[+31.990]GY[+15.995]INF[+31.990]SYEVLTPL.K		F[+32], P[+16][+32], Y[+16]	891.43	3	2672.27	2672.27	0	1.7	17	Non	148.35	148.35	0	1.79	1703	>sp|P02817|AMELX_BOVIN Amelogenin, X isoform OS=Bos taurus OX=9913 GN=AMELX PE=1 SV=2	1	hf1_10472_ebo_30_1_261219.ScanId;v=1;d1=32606.32606.3	controllerType=0 controllerNumber=1 scan=32606	65.3271
25055:4	1	S.MP[+15.995]LPPHPGHPGYINFSYEVLTPLK.W		P[+16]	680.857	4	2720.4	2720.39	0	5.2	17	NRagged	305.23	253.61	4	5.5	1703	>sp|P02817|AMELX_BOVIN Amelogenin, X isoform OS=Bos taurus OX=9913 GN=AMELX PE=1 SV=2	1	hf1_10472_ebo_30_1_261219.ScanId;v=1;d1=19405.19405.2	controllerType=0 controllerNumber=1 scan=19405	41.6377
24611:4	1	S.MP[+15.995]LPPHPGHPGYINFSYEVLTPLK.W		P[+16]	680.857	4	2720.41	2720.39	0	5.6	17	NRagged	355.08	355.08	4	5.8	1703	>sp|P02817|AMELX_BOVIN Amelogenin, X isoform OS=Bos taurus OX=9913 GN=AMELX PE=1 SV=2	1	hf1_10472_ebo_30_1_261219.ScanId;v=1;d1=19107.19107.4	controllerType=0 controllerNumber=1 scan=19107	41.133
26604:4	1	S.MP[+15.995]LPPHPGHPGYINFSYEVLTPLK.W		P[+16]	680.856	4	2720.4	2720.39	0	4.7	17	NRagged	419.54	393.68	4	6.92	1703	>sp|P02817|AMELX_BOVIN Amelogenin, X isoform OS=Bos taurus OX=9913 GN=AMELX PE=1 SV=2	1	hf1_10472_ebo_30_1_261219.ScanId;v=1;d1=20460.20460.4	controllerType=0 controllerNumber=1 scan=20460	43.4144
50197:4	1	S.MP[+15.995]LPPHPGHPGYINFSYEVLTPLK.W		P[+16]	680.859	4	2720.41	2720.39	0	8	17	NRagged	436.31	436.31	4	6.76	1703	>sp|P02817|AMELX_BOVIN Amelogenin, X isoform OS=Bos taurus OX=9913 GN=AMELX PE=1 SV=2	1	hf1_10472_ebo_30_1_261219.ScanId;v=1;d1=36435.36435.4	controllerType=0 controllerNumber=1 scan=36435	73.5642
50128:3	1	S.MPLPPHPGHPGYINFS[+79.966]YEVLTPLK.W		S[+80]	928.797	3	2784.38	2784.36	0	5.4	17	NRagged	485.58	485.58	167.56	7.19	1703	>sp|P02817|AMELX_BOVIN Amelogenin, X isoform OS=Bos taurus OX=9913 GN=AMELX PE=1 SV=2	1	hf1_10472_ebo_30_1_261219.ScanId;v=1;d1=36386.36386.3	controllerType=0 controllerNumber=1 scan=36386	73.4804
25645:4	1	S.M[+15.995]PLPPHPGHPGYINFSYEVLTPLK.W		M[+16]	680.854	4	2720.39	2720.39	0	0.7	17	NRagged	489.22	489.22	9.49	6.21	1703	>sp|P02817|AMELX_BOVIN Amelogenin, X isoform OS=Bos taurus OX=9913 GN=AMELX PE=1 SV=2	1	hf1_10472_ebo_30_1_261219.ScanId;v=1;d1=19796.19796.4	controllerType=0 controllerNumber=1 scan=19796	42.2963
50126:4	1	S.MPLPPHPGHPGYINFS[+79.966]YEVLTPLK.W		S[+80]	696.85	4	2784.38	2784.36	0	6	17	NRagged	547.89	547.89	249.19	7.72	1703	>sp|P02817|AMELX_BOVIN Amelogenin, X isoform OS=Bos taurus OX=9913 GN=AMELX PE=1 SV=2	1	hf1_10472_ebo_30_1_261219.ScanId;v=1;d1=36385.36385.4	controllerType=0 controllerNumber=1 scan=36385	73.4789
27787:4	1	S.MPLPPHPGHPGYINFS[+79.966]YEVLTPLK.W		S[+80]	696.851	4	2784.38	2784.36	0	7	17	NRagged	631.42	631.42	313.02	9.43	1703	>sp|P02817|AMELX_BOVIN Amelogenin, X isoform OS=Bos taurus OX=9913 GN=AMELX PE=1 SV=2	1	hf1_10472_ebo_30_1_261219.ScanId;v=1;d1=21258.21258.6	controllerType=0 controllerNumber=1 scan=21258	44.781
25230:4	1	S.M[+15.995]PLPPHPGHPGYINFSYEVLTPLK.W		M[+16]	680.856	4	2720.4	2720.39	0	4.9	17	NRagged	642.05	642.05	2.23	9.5	1703	>sp|P02817|AMELX_BOVIN Amelogenin, X isoform OS=Bos taurus OX=9913 GN=AMELX PE=1 SV=2	1	hf1_10472_ebo_30_1_261219.ScanId;v=1;d1=19522.19522.4	controllerType=0 controllerNumber=1 scan=19522	41.8345
24912:4	1	S.MP[+15.995]LPPHPGHPGYINFSYEVLTPLK.W		P[+16]	680.857	4	2720.41	2720.39	0	6.5	17	NRagged	654.75	654.75	4	10.43	1703	>sp|P02817|AMELX_BOVIN Amelogenin, X isoform OS=Bos taurus OX=9913 GN=AMELX PE=1 SV=2	1	hf1_10472_ebo_30_1_261219.ScanId;v=1;d1=19312.19312.4	controllerType=0 controllerNumber=1 scan=19312	41.4844
28170:4	1	S.MPLPPHPGHPGYINFS[+79.966]YEVLTPLK.W		S[+80]	696.851	4	2784.38	2784.36	0	6.9	17	NRagged	729.91	729.91	369.73	11.43	1703	>sp|P02817|AMELX_BOVIN Amelogenin, X isoform OS=Bos taurus OX=9913 GN=AMELX PE=1 SV=2	1	hf1_10472_ebo_30_1_261219.ScanId;v=1;d1=21513.21513.4	controllerType=0 controllerNumber=1 scan=21513	45.2268
27875:4	1	S.MPLPPHPGHPGYINFS[+79.966]YEVLTPLK.W		S[+80]	696.851	4	2784.38	2784.36	0	6.5	17	NRagged	762.87	762.87	405.39	12.43	1703	>sp|P02817|AMELX_BOVIN Amelogenin, X isoform OS=Bos taurus OX=9913 GN=AMELX PE=1 SV=2	1	hf1_10472_ebo_30_1_261219.ScanId;v=1;d1=21318.21318.4	controllerType=0 controllerNumber=1 scan=21318	44.8839
27820:3	1	S.MPLPPHPGHPGYINFS[+79.966]YEVLTPLK.W		S[+80]	928.798	3	2784.38	2784.36	0	6.8	17	NRagged	1030.48	1030.48	510.06	17.71	1703	>sp|P02817|AMELX_BOVIN Amelogenin, X isoform OS=Bos taurus OX=9913 GN=AMELX PE=1 SV=2	1	hf1_10472_ebo_30_1_261219.ScanId;v=1;d1=21279.21279.3	controllerType=0 controllerNumber=1 scan=21279	44.8169
28117:3	1	S.MPLPPHPGHPGYINFS[+79.966]YEVLTPLK.W		S[+80]	928.798	3	2784.38	2784.36	0	5.7	17	NRagged	1057.17	1057.17	465.57	18.77	1703	>sp|P02817|AMELX_BOVIN Amelogenin, X isoform OS=Bos taurus OX=9913 GN=AMELX PE=1 SV=2	1	hf1_10472_ebo_30_1_261219.ScanId;v=1;d1=21480.21480.3	controllerType=0 controllerNumber=1 scan=21480	45.1705
48422:3	1	S.MP[+15.995]LPPHPGHPGYINFS[+79.966]YEVLTPLK.W		P[+16], S[+80]	934.13	3	2800.38	2800.36	0	6.7	17	NRagged	23.4	23.4	4	2.57	1703	>sp|P02817|AMELX_BOVIN Amelogenin, X isoform OS=Bos taurus OX=9913 GN=AMELX PE=1 SV=2	1	hf1_10472_ebo_30_1_261219.ScanId;v=1;d1=35116.35116.3	controllerType=0 controllerNumber=1 scan=35116	70.7294
50696:3	1	S.MP[+15.995]LPPHPGHPGYINFS[+79.966]YEVLTPLK.W		P[+16], S[+80]	934.127	3	2800.37	2800.36	0	3.7	17	NRagged	30.57	30.57	4	2.38	1703	>sp|P02817|AMELX_BOVIN Amelogenin, X isoform OS=Bos taurus OX=9913 GN=AMELX PE=1 SV=2	1	hf1_10472_ebo_30_1_261219.ScanId;v=1;d1=37339.37339.3	controllerType=0 controllerNumber=1 scan=37339	77.772
50302:3	1	S.M[+15.995]PLPPHPGHPGYINFS[+79.966]YEVLTPLK.W		M[+16], S[+80]	934.13	3	2800.38	2800.36	0	6.7	17	NRagged	41.77	41.77	12.04	2.33	1703	>sp|P02817|AMELX_BOVIN Amelogenin, X isoform OS=Bos taurus OX=9913 GN=AMELX PE=1 SV=2	1	hf1_10472_ebo_30_1_261219.ScanId;v=1;d1=36648.36648.6	controllerType=0 controllerNumber=1 scan=36648	74.5983
50631:3	1	S.MP[+15.995]LPPHPGHPGYINFS[+79.966]YEVLTPLK.W		P[+16], S[+80]	934.127	3	2800.37	2800.36	0	3.5	17	NRagged	58.7	58.7	4	2.42	1703	>sp|P02817|AMELX_BOVIN Amelogenin, X isoform OS=Bos taurus OX=9913 GN=AMELX PE=1 SV=2	1	hf1_10472_ebo_30_1_261219.ScanId;v=1;d1=37256.37256.3	controllerType=0 controllerNumber=1 scan=37256	77.4322
47270:3	1	S.MP[+15.995]LPPHPGHPGYINFS[+79.966]YEVLTPLK.W		P[+16], S[+80]	934.127	3	2800.37	2800.36	0	3.5	17	NRagged	100.24	100.24	4	2.41	1703	>sp|P02817|AMELX_BOVIN Amelogenin, X isoform OS=Bos taurus OX=9913 GN=AMELX PE=1 SV=2	1	hf1_10472_ebo_30_1_261219.ScanId;v=1;d1=34269.34269.3	controllerType=0 controllerNumber=1 scan=34269	68.9863
48208:3	1	S.MP[+15.995]LPPHPGHPGYINFS[+79.966]YEVLTPLK.W		P[+16], S[+80]	934.125	3	2800.36	2800.36	0	1.8	17	NRagged	122.72	122.72	4	2.55	1703	>sp|P02817|AMELX_BOVIN Amelogenin, X isoform OS=Bos taurus OX=9913 GN=AMELX PE=1 SV=2	1	hf1_10472_ebo_30_1_261219.ScanId;v=1;d1=34952.34952.3	controllerType=0 controllerNumber=1 scan=34952	70.3809
46403:4	1	S.MP[+15.995]LPPHPGHPGYINFS[+79.966]YEVLTPLK.W		P[+16], S[+80]	700.848	4	2800.37	2800.36	0	5.5	17	NRagged	136.37	136.37	4	2.85	1703	>sp|P02817|AMELX_BOVIN Amelogenin, X isoform OS=Bos taurus OX=9913 GN=AMELX PE=1 SV=2	1	hf1_10472_ebo_30_1_261219.ScanId;v=1;d1=33631.33631.4	controllerType=0 controllerNumber=1 scan=33631	67.5544
49519:3	1	S.MP[+15.995]LPPHPGHPGYINFS[+79.966]YEVLTPLK.W		P[+16], S[+80]	934.124	3	2800.36	2800.36	0	0.6	17	NRagged	136.78	136.78	4	2.55	1703	>sp|P02817|AMELX_BOVIN Amelogenin, X isoform OS=Bos taurus OX=9913 GN=AMELX PE=1 SV=2	1	hf1_10472_ebo_30_1_261219.ScanId;v=1;d1=35931.35931.3	controllerType=0 controllerNumber=1 scan=35931	72.4652
45594:4	1	S.MP[+15.995]LPPHPGHPGYINFS[+79.966]YEVLTPLK.W		P[+16], S[+80]	700.847	4	2800.36	2800.36	0	2.7	17	NRagged	142.58	142.58	4	2.38	1703	>sp|P02817|AMELX_BOVIN Amelogenin, X isoform OS=Bos taurus OX=9913 GN=AMELX PE=1 SV=2	1	hf1_10472_ebo_30_1_261219.ScanId;v=1;d1=33009.33009.3	controllerType=0 controllerNumber=1 scan=33009	66.2568
47750:3	1	S.M[+15.995]PLPPHPGHPGYINFS[+79.966]YEVLTPLK.W		M[+16], S[+80]	934.127	3	2800.37	2800.36	0	3.6	17	NRagged	145.91	145.91	7.4	2.61	1703	>sp|P02817|AMELX_BOVIN Amelogenin, X isoform OS=Bos taurus OX=9913 GN=AMELX PE=1 SV=2	1	hf1_10472_ebo_30_1_261219.ScanId;v=1;d1=34617.34617.3	controllerType=0 controllerNumber=1 scan=34617	69.6991
50461:3	1	S.M[+15.995]PLPPHPGHPGYINFS[+79.966]YEVLTPLK.W		M[+16], S[+80]	934.128	3	2800.37	2800.36	0	4.3	17	NRagged	149.04	149.04	12.38	3.77	1703	>sp|P02817|AMELX_BOVIN Amelogenin, X isoform OS=Bos taurus OX=9913 GN=AMELX PE=1 SV=2	1	hf1_10472_ebo_30_1_261219.ScanId;v=1;d1=37067.37067.3	controllerType=0 controllerNumber=1 scan=37067	76.7531
44766:3	1	S.MP[+15.995]LPPHPGHPGYINFS[+79.966]YEVLTPLK.W		P[+16], S[+80]	934.128	3	2800.37	2800.36	0	4	17	NRagged	149.65	149.65	4	2.28	1703	>sp|P02817|AMELX_BOVIN Amelogenin, X isoform OS=Bos taurus OX=9913 GN=AMELX PE=1 SV=2	1	hf1_10472_ebo_30_1_261219.ScanId;v=1;d1=32318.32318.2	controllerType=0 controllerNumber=1 scan=32318	64.7311
50403:3	1	S.MP[+15.995]LPPHPGHPGYINFS[+79.966]YEVLTPLK.W		P[+16], S[+80]	934.127	3	2800.37	2800.36	0	3.3	17	NRagged	151.39	151.39	4	2.61	1703	>sp|P02817|AMELX_BOVIN Amelogenin, X isoform OS=Bos taurus OX=9913 GN=AMELX PE=1 SV=2	1	hf1_10472_ebo_30_1_261219.ScanId;v=1;d1=36984.36984.3	controllerType=0 controllerNumber=1 scan=36984	76.4096
25798:3	1	S.MP[+15.995]LPPHPGHPGYIN[+0.984]FSYEVLTPLK.W		N[+1], P[+16]	907.802	3	2721.39	2721.37	0	5.8	17	NRagged	156.46	156.46	4	2.49	1703	>sp|P02817|AMELX_BOVIN Amelogenin, X isoform OS=Bos taurus OX=9913 GN=AMELX PE=1 SV=2	1	hf1_10472_ebo_30_1_261219.ScanId;v=1;d1=19900.19900.3	controllerType=0 controllerNumber=1 scan=19900	42.4683
47980:3	1	S.MP[+15.995]LPPHPGHPGYINFS[+79.966]YEVLTPLK.W		P[+16], S[+80]	934.13	3	2800.38	2800.36	0	6.5	17	NRagged	187.4	187.4	4	3.84	1703	>sp|P02817|AMELX_BOVIN Amelogenin, X isoform OS=Bos taurus OX=9913 GN=AMELX PE=1 SV=2	1	hf1_10472_ebo_30_1_261219.ScanId;v=1;d1=34788.34788.3	controllerType=0 controllerNumber=1 scan=34788	70.0406
46835:3	1	S.M[+15.995]PLPPHPGHPGYINFS[+79.966]YEVLTPLK.W		M[+16], S[+80]	934.128	3	2800.37	2800.36	0	4.9	17	NRagged	211.14	211.14	18.87	4.23	1703	>sp|P02817|AMELX_BOVIN Amelogenin, X isoform OS=Bos taurus OX=9913 GN=AMELX PE=1 SV=2	1	hf1_10472_ebo_30_1_261219.ScanId;v=1;d1=33953.33953.3	controllerType=0 controllerNumber=1 scan=33953	68.2867
45565:4	1	S.MP[+15.995]LPPHPGHPGYINFS[+79.966]YEVLTPLK.W		P[+16], S[+80]	700.848	4	2800.37	2800.36	0	4.8	17	NRagged	218.37	218.37	4	3.96	1703	>sp|P02817|AMELX_BOVIN Amelogenin, X isoform OS=Bos taurus OX=9913 GN=AMELX PE=1 SV=2	1	hf1_10472_ebo_30_1_261219.ScanId;v=1;d1=32987.32987.4	controllerType=0 controllerNumber=1 scan=32987	66.2124
50545:3	1	S.MP[+15.995]LPPHPGHPGYINFS[+79.966]YEVLTPLK.W		P[+16], S[+80]	934.128	3	2800.37	2800.36	0	4.6	17	NRagged	223.29	223.29	4	4.99	1703	>sp|P02817|AMELX_BOVIN Amelogenin, X isoform OS=Bos taurus OX=9913 GN=AMELX PE=1 SV=2	1	hf1_10472_ebo_30_1_261219.ScanId;v=1;d1=37160.37160.3	controllerType=0 controllerNumber=1 scan=37160	77.0897
48820:3	1	S.M[+15.995]PLPPHPGHPGYINFS[+79.966]YEVLTPLK.W		M[+16], S[+80]	934.132	3	2800.38	2800.36	0	8.6	17	NRagged	232.03	232.03	14.13	3.85	1703	>sp|P02817|AMELX_BOVIN Amelogenin, X isoform OS=Bos taurus OX=9913 GN=AMELX PE=1 SV=2	1	hf1_10472_ebo_30_1_261219.ScanId;v=1;d1=35424.35424.3	controllerType=0 controllerNumber=1 scan=35424	71.416
49301:3	1	S.MP[+15.995]LPPHPGHPGYINFS[+79.966]YEVLTPLK.W		P[+16], S[+80]	934.127	3	2800.37	2800.36	0	3.2	17	NRagged	236.05	236.05	4	3.78	1703	>sp|P02817|AMELX_BOVIN Amelogenin, X isoform OS=Bos taurus OX=9913 GN=AMELX PE=1 SV=2	1	hf1_10472_ebo_30_1_261219.ScanId;v=1;d1=35770.35770.3	controllerType=0 controllerNumber=1 scan=35770	72.118
46016:4	1	S.MP[+15.995]LPPHPGHPGYINFS[+79.966]YEVLTPLK.W		P[+16], S[+80]	700.848	4	2800.37	2800.36	0	4.5	17	NRagged	246.42	246.42	4	5.41	1703	>sp|P02817|AMELX_BOVIN Amelogenin, X isoform OS=Bos taurus OX=9913 GN=AMELX PE=1 SV=2	1	hf1_10472_ebo_30_1_261219.ScanId;v=1;d1=33328.33328.4	controllerType=0 controllerNumber=1 scan=33328	66.9159
44727:3	1	S.M[+15.995]PLPPHPGHPGYINFS[+79.966]YEVLTPLK.W		M[+16], S[+80]	934.13	3	2800.38	2800.36	0	7.1	17	NRagged	246.95	246.95	5.89	5.61	1703	>sp|P02817|AMELX_BOVIN Amelogenin, X isoform OS=Bos taurus OX=9913 GN=AMELX PE=1 SV=2	1	hf1_10472_ebo_30_1_261219.ScanId;v=1;d1=32291.32291.3	controllerType=0 controllerNumber=1 scan=32291	64.682
46429:3	1	S.MP[+15.995]LPPHPGHPGYINFS[+79.966]YEVLTPLK.W		P[+16], S[+80]	934.128	3	2800.37	2800.36	0	5	17	NRagged	249.18	249.18	4	5.69	1703	>sp|P02817|AMELX_BOVIN Amelogenin, X isoform OS=Bos taurus OX=9913 GN=AMELX PE=1 SV=2	1	hf1_10472_ebo_30_1_261219.ScanId;v=1;d1=33650.33650.3	controllerType=0 controllerNumber=1 scan=33650	67.5932
47053:3	1	S.MP[+15.995]LPPHPGHPGYINFS[+79.966]YEVLTPLK.W		P[+16], S[+80]	934.128	3	2800.37	2800.36	0	4.1	17	NRagged	250.63	250.63	4	5.82	1703	>sp|P02817|AMELX_BOVIN Amelogenin, X isoform OS=Bos taurus OX=9913 GN=AMELX PE=1 SV=2	1	hf1_10472_ebo_30_1_261219.ScanId;v=1;d1=34114.34114.3	controllerType=0 controllerNumber=1 scan=34114	68.641
45788:4	1	S.MP[+15.995]LPPHPGHPGYINFS[+79.966]YEVLTPLK.W		P[+16], S[+80]	700.848	4	2800.37	2800.36	0	5.3	17	NRagged	256.84	256.84	4	5.41	1703	>sp|P02817|AMELX_BOVIN Amelogenin, X isoform OS=Bos taurus OX=9913 GN=AMELX PE=1 SV=2	1	hf1_10472_ebo_30_1_261219.ScanId;v=1;d1=33157.33157.4	controllerType=0 controllerNumber=1 scan=33157	66.5663
46618:3	1	S.M[+15.995]PLPPHPGHPGYINFS[+79.966]YEVLTPLK.W		M[+16], S[+80]	934.126	3	2800.36	2800.36	0	2.6	17	NRagged	262.7	262.7	10.11	5.22	1703	>sp|P02817|AMELX_BOVIN Amelogenin, X isoform OS=Bos taurus OX=9913 GN=AMELX PE=1 SV=2	1	hf1_10472_ebo_30_1_261219.ScanId;v=1;d1=33793.33793.3	controllerType=0 controllerNumber=1 scan=33793	67.9379
25243:4	1	S.MP[+15.995]LPPHPGHP[+15.995]GYINFSYEVLTPLK.W		P[+16]*2	684.85	4	2736.38	2736.39	0	-2.3	17	NRagged	277.74	277.74	5.06	4.23	1703	>sp|P02817|AMELX_BOVIN Amelogenin, X isoform OS=Bos taurus OX=9913 GN=AMELX PE=1 SV=2	1	hf1_10472_ebo_30_1_261219.ScanId;v=1;d1=19529.19529.4	controllerType=0 controllerNumber=1 scan=19529	41.8445
00011:4	1	S.MP[+15.995]LPPHPGHPGYINFS[+79.966]YEVLTPLK.W		P[+16], S[+80]	700.846	4	2800.36	2800.36	0	2.1	17	NRagged	287.3	287.3	4	5.68	1703	>sp|P02817|AMELX_BOVIN Amelogenin, X isoform OS=Bos taurus OX=9913 GN=AMELX PE=1 SV=2	1	hf1_10472_ebo_30_1_261219.ScanId;v=1;d1=14.14.4	controllerType=0 controllerNumber=1 scan=14	0.0524
00285:3	1	S.MP[+15.995]LPPHPGHPGYINFS[+79.966]YEVLTPLK.W		P[+16], S[+80]	934.128	3	2800.37	2800.36	0	4.1	17	NRagged	289.77	289.77	4	6.04	1703	>sp|P02817|AMELX_BOVIN Amelogenin, X isoform OS=Bos taurus OX=9913 GN=AMELX PE=1 SV=2	1	hf1_10472_ebo_30_1_261219.ScanId;v=1;d1=694.694.3	controllerType=0 controllerNumber=1 scan=694	3.3301
44971:3	1	S.MP[+15.995]LPPHPGHPGYINFS[+79.966]YEVLTPLK.W		P[+16], S[+80]	934.127	3	2800.37	2800.36	0	3.1	17	NRagged	307.17	307.17	4	5.28	1703	>sp|P02817|AMELX_BOVIN Amelogenin, X isoform OS=Bos taurus OX=9913 GN=AMELX PE=1 SV=2	1	hf1_10472_ebo_30_1_261219.ScanId;v=1;d1=32480.32480.3	controllerType=0 controllerNumber=1 scan=32480	65.0719
26233:5	1	S.MP[+15.995]LPPHPGHPGYINFS[+79.966]YEVLTPLK.W		P[+16], S[+80]	560.88	5	2800.37	2800.36	0	5	17	NRagged	314.31	314.31	4	5.05	1703	>sp|P02817|AMELX_BOVIN Amelogenin, X isoform OS=Bos taurus OX=9913 GN=AMELX PE=1 SV=2	1	hf1_10472_ebo_30_1_261219.ScanId;v=1;d1=20194.20194.5	controllerType=0 controllerNumber=1 scan=20194	42.9568
29680:3	1	S.M[+15.995]PLPPHPGHPGYINFS[+79.966]YEVLTPLK.W		M[+16], S[+80]	934.122	3	2800.35	2800.36	0	-1.4	17	NRagged	323.95	323.95	6.98	5.02	1703	>sp|P02817|AMELX_BOVIN Amelogenin, X isoform OS=Bos taurus OX=9913 GN=AMELX PE=1 SV=2	1	hf1_10472_ebo_30_1_261219.ScanId;v=1;d1=22485.22485.3	controllerType=0 controllerNumber=1 scan=22485	46.9817
49694:3	1	S.M[+15.995]PLPPHPGHPGYINFS[+79.966]YEVLTPLK.W		M[+16], S[+80]	934.129	3	2800.37	2800.36	0	5.2	17	NRagged	327.77	327.77	44.18	6.82	1703	>sp|P02817|AMELX_BOVIN Amelogenin, X isoform OS=Bos taurus OX=9913 GN=AMELX PE=1 SV=2	1	hf1_10472_ebo_30_1_261219.ScanId;v=1;d1=36069.36069.3	controllerType=0 controllerNumber=1 scan=36069	72.8114
26517:5	1	S.MP[+15.995]LPPHPGHPGYINFS[+79.966]YEVLTPLK.W		P[+16], S[+80]	560.881	5	2800.37	2800.36	0	6.2	17	NRagged	364.42	364.42	4	6.29	1703	>sp|P02817|AMELX_BOVIN Amelogenin, X isoform OS=Bos taurus OX=9913 GN=AMELX PE=1 SV=2	1	hf1_10472_ebo_30_1_261219.ScanId;v=1;d1=20397.20397.5	controllerType=0 controllerNumber=1 scan=20397	43.3092
45334:3	1	S.M[+15.995]PLPPHPGHPGYINFS[+79.966]YEVLTPLK.W		M[+16], S[+80]	934.13	3	2800.38	2800.36	0	6.5	17	NRagged	392.98	392.98	17.14	6.99	1703	>sp|P02817|AMELX_BOVIN Amelogenin, X isoform OS=Bos taurus OX=9913 GN=AMELX PE=1 SV=2	1	hf1_10472_ebo_30_1_261219.ScanId;v=1;d1=32775.32775.3	controllerType=0 controllerNumber=1 scan=32775	65.6779
46228:3	1	S.M[+15.995]PLPPHPGHPGYINFS[+79.966]YEVLTPLK.W		M[+16], S[+80]	934.128	3	2800.37	2800.36	0	4.4	17	NRagged	427.59	427.59	23.52	7.8	1703	>sp|P02817|AMELX_BOVIN Amelogenin, X isoform OS=Bos taurus OX=9913 GN=AMELX PE=1 SV=2	1	hf1_10472_ebo_30_1_261219.ScanId;v=1;d1=33492.33492.3	controllerType=0 controllerNumber=1 scan=33492	67.2495
27812:4	1	S.MP[+15.995]LPPHPGHPGYINFS[+79.966]YEVLTPLK.W		P[+16], S[+80]	700.846	4	2800.36	2800.36	0	1.4	17	NRagged	434.14	434.14	5.8	6.22	1703	>sp|P02817|AMELX_BOVIN Amelogenin, X isoform OS=Bos taurus OX=9913 GN=AMELX PE=1 SV=2	1	hf1_10472_ebo_30_1_261219.ScanId;v=1;d1=21274.21274.6	controllerType=0 controllerNumber=1 scan=21274	44.8066
45783:3	1	S.MP[+15.995]LPPHPGHPGYINFS[+79.966]YEVLTPLK.W		P[+16], S[+80]	934.13	3	2800.38	2800.36	0	7.1	17	NRagged	454.13	454.13	4	7.66	1703	>sp|P02817|AMELX_BOVIN Amelogenin, X isoform OS=Bos taurus OX=9913 GN=AMELX PE=1 SV=2	1	hf1_10472_ebo_30_1_261219.ScanId;v=1;d1=33151.33151.3	controllerType=0 controllerNumber=1 scan=33151	66.5515
28610:3	1	S.M[+15.995]PLPPHPGHPGYINFS[+79.966]YEVLTPLK.W		M[+16], S[+80]	934.122	3	2800.35	2800.36	0	-1.9	17	NRagged	473.17	473.17	5.81	6.25	1703	>sp|P02817|AMELX_BOVIN Amelogenin, X isoform OS=Bos taurus OX=9913 GN=AMELX PE=1 SV=2	1	hf1_10472_ebo_30_1_261219.ScanId;v=1;d1=21798.21798.3	controllerType=0 controllerNumber=1 scan=21798	45.72
46002:3	1	S.MP[+15.995]LPPHPGHPGYINFS[+79.966]YEVLTPLK.W		P[+16], S[+80]	934.127	3	2800.37	2800.36	0	3.2	17	NRagged	528.62	528.62	4	7.38	1703	>sp|P02817|AMELX_BOVIN Amelogenin, X isoform OS=Bos taurus OX=9913 GN=AMELX PE=1 SV=2	1	hf1_10472_ebo_30_1_261219.ScanId;v=1;d1=33319.33319.3	controllerType=0 controllerNumber=1 scan=33319	66.8995
25483:3	1	S.M[+15.995]PLPPHPGHPGYINFS[+79.966]YEVLTPLK.W		M[+16], S[+80]	934.131	3	2800.38	2800.36	0	8.1	17	NRagged	544.86	544.86	14.56	7.33	1703	>sp|P02817|AMELX_BOVIN Amelogenin, X isoform OS=Bos taurus OX=9913 GN=AMELX PE=1 SV=2	1	hf1_10472_ebo_30_1_261219.ScanId;v=1;d1=19689.19689.3	controllerType=0 controllerNumber=1 scan=19689	42.1172
25964:4	1	S.MP[+15.995]LPPHPGHPGYIN[+0.984]FSYEVLTPLK.W		N[+1], P[+16]	681.103	4	2721.39	2721.37	0	5.1	17	NRagged	569.2	552.27	4	8.5	1703	>sp|P02817|AMELX_BOVIN Amelogenin, X isoform OS=Bos taurus OX=9913 GN=AMELX PE=1 SV=2	1	hf1_10472_ebo_30_1_261219.ScanId;v=1;d1=20011.20011.4	controllerType=0 controllerNumber=1 scan=20011	42.6507
26917:4	1	S.M[+31.990]PLPPHPGHPGYINFS[+79.966]YEVLTPLK.W		M[+32], S[+80]	704.846	4	2816.36	2816.35	0	3.2	17	NRagged	586.69	586.69	0	7.18	1703	>sp|P02817|AMELX_BOVIN Amelogenin, X isoform OS=Bos taurus OX=9913 GN=AMELX PE=1 SV=2	1	hf1_10472_ebo_30_1_261219.ScanId;v=1;d1=20669.20669.4	controllerType=0 controllerNumber=1 scan=20669	43.7724
26083:4	1	S.MP[+15.995]LPPHPGHPGYINFS[+79.966]YEVLTPLK.W		P[+16], S[+80]	700.848	4	2800.37	2800.36	0	4.9	17	NRagged	607.45	607.45	4	9.5	1703	>sp|P02817|AMELX_BOVIN Amelogenin, X isoform OS=Bos taurus OX=9913 GN=AMELX PE=1 SV=2	1	hf1_10472_ebo_30_1_261219.ScanId;v=1;d1=20096.20096.4	controllerType=0 controllerNumber=1 scan=20096	42.7939
28289:3	1	S.M[+15.995]PLPPHPGHPGYINFS[+79.966]YEVLTPLK.W		M[+16], S[+80]	934.127	3	2800.37	2800.36	0	3	17	NRagged	613.41	613.41	24.83	8.46	1703	>sp|P02817|AMELX_BOVIN Amelogenin, X isoform OS=Bos taurus OX=9913 GN=AMELX PE=1 SV=2	1	hf1_10472_ebo_30_1_261219.ScanId;v=1;d1=21592.21592.3	controllerType=0 controllerNumber=1 scan=21592	45.3616
26973:4	1	S.M[+15.995]PLPPHPGHPGYINFS[+79.966]YEVLTPLK.W		M[+16], S[+80]	700.848	4	2800.37	2800.36	0	4.1	17	NRagged	679.17	679.17	7.45	9.88	1703	>sp|P02817|AMELX_BOVIN Amelogenin, X isoform OS=Bos taurus OX=9913 GN=AMELX PE=1 SV=2	1	hf1_10472_ebo_30_1_261219.ScanId;v=1;d1=20704.20704.4	controllerType=0 controllerNumber=1 scan=20704	43.8348
26655:4	1	S.M[+15.995]PLPPHPGHPGYINFS[+79.966]YEVLTPLK.W		M[+16], S[+80]	700.849	4	2800.38	2800.36	0	6.5	17	NRagged	701.95	701.95	7.47	11.43	1703	>sp|P02817|AMELX_BOVIN Amelogenin, X isoform OS=Bos taurus OX=9913 GN=AMELX PE=1 SV=2	1	hf1_10472_ebo_30_1_261219.ScanId;v=1;d1=20495.20495.4	controllerType=0 controllerNumber=1 scan=20495	43.4797
28976:3	1	S.MPLPPHPGHPGYIN[+0.984]FS[+79.966]YEVLTPLK.W		N[+1], S[+80]	929.127	3	2785.37	2785.35	0	7.7	17	NRagged	705.28	705.28	340.6	11.71	1703	>sp|P02817|AMELX_BOVIN Amelogenin, X isoform OS=Bos taurus OX=9913 GN=AMELX PE=1 SV=2	1	hf1_10472_ebo_30_1_261219.ScanId;v=1;d1=22030.22030.3	controllerType=0 controllerNumber=1 scan=22030	46.1467
26775:2	1	S.M[+15.995]PLPPHPGHPGYINFS[+79.966]YEVLTPLK.W		M[+16], S[+80]	1400.69	2	2800.38	2800.36	0	8.5	17	NRagged	722	722	58.09	10.83	1703	>sp|P02817|AMELX_BOVIN Amelogenin, X isoform OS=Bos taurus OX=9913 GN=AMELX PE=1 SV=2	1	hf1_10472_ebo_30_1_261219.ScanId;v=1;d1=20574.20574.2	controllerType=0 controllerNumber=1 scan=20574	43.6142
26376:4	1	S.MP[+15.995]LPPHPGHPGYINFS[+79.966]YEVLTPLK.W		P[+16], S[+80]	700.848	4	2800.37	2800.36	0	5.3	17	NRagged	723.93	723.93	4	11.5	1703	>sp|P02817|AMELX_BOVIN Amelogenin, X isoform OS=Bos taurus OX=9913 GN=AMELX PE=1 SV=2	1	hf1_10472_ebo_30_1_261219.ScanId;v=1;d1=20298.20298.4	controllerType=0 controllerNumber=1 scan=20298	43.1389
50146:4	1	S.MP[+15.995]LPPHPGHPGYINFS[+79.966]YEVLTPLK.W		P[+16], S[+80]	700.848	4	2800.37	2800.36	0	5.2	17	NRagged	734.88	734.88	5.8	11.5	1703	>sp|P02817|AMELX_BOVIN Amelogenin, X isoform OS=Bos taurus OX=9913 GN=AMELX PE=1 SV=2	1	hf1_10472_ebo_30_1_261219.ScanId;v=1;d1=36398.36398.4	controllerType=0 controllerNumber=1 scan=36398	73.5003
26181:2	1	S.M[+15.995]PLPPHPGHPGYINFS[+79.966]YEVLTPLK.W		M[+16], S[+80]	1400.69	2	2800.38	2800.36	0	6.7	17	NRagged	751.38	751.38	50.82	12.18	1703	>sp|P02817|AMELX_BOVIN Amelogenin, X isoform OS=Bos taurus OX=9913 GN=AMELX PE=1 SV=2	1	hf1_10472_ebo_30_1_261219.ScanId;v=1;d1=20162.20162.2	controllerType=0 controllerNumber=1 scan=20162	42.9036
25803:3	1	S.M[+15.995]PLPPHPGHPGYINFS[+79.966]YEVLTPLK.W		M[+16], S[+80]	934.124	3	2800.36	2800.36	0	0.5	17	NRagged	778.68	778.68	6.03	12.07	1703	>sp|P02817|AMELX_BOVIN Amelogenin, X isoform OS=Bos taurus OX=9913 GN=AMELX PE=1 SV=2	1	hf1_10472_ebo_30_1_261219.ScanId;v=1;d1=19903.19903.3	controllerType=0 controllerNumber=1 scan=19903	42.4727
27971:3	1	S.M[+15.995]PLPPHPGHPGYINFS[+79.966]YEVLTPLK.W		M[+16], S[+80]	934.127	3	2800.37	2800.36	0	3.7	17	NRagged	796.61	796.61	1.88	12.16	1703	>sp|P02817|AMELX_BOVIN Amelogenin, X isoform OS=Bos taurus OX=9913 GN=AMELX PE=1 SV=2	1	hf1_10472_ebo_30_1_261219.ScanId;v=1;d1=21381.21381.3	controllerType=0 controllerNumber=1 scan=21381	44.9973
26478:2	1	S.M[+15.995]PLPPHPGHPGYINFS[+79.966]YEVLTPLK.W		M[+16], S[+80]	1400.69	2	2800.37	2800.36	0	3.9	17	NRagged	839.34	839.34	49.84	12.63	1703	>sp|P02817|AMELX_BOVIN Amelogenin, X isoform OS=Bos taurus OX=9913 GN=AMELX PE=1 SV=2	1	hf1_10472_ebo_30_1_261219.ScanId;v=1;d1=20370.20370.2	controllerType=0 controllerNumber=1 scan=20370	43.2616
25790:3	1	S.M[+15.995]PLPPHPGHPGYIN[+0.984]FSYEVLTPLK.W		M[+16], N[+1]	907.802	3	2721.39	2721.37	0	5.7	17	NRagged	849.5	792.13	43.87	13.77	1703	>sp|P02817|AMELX_BOVIN Amelogenin, X isoform OS=Bos taurus OX=9913 GN=AMELX PE=1 SV=2	1	hf1_10472_ebo_30_1_261219.ScanId;v=1;d1=19894.19894.3	controllerType=0 controllerNumber=1 scan=19894	42.4582
27094:3	1	S.MP[+31.990]LPPHPGHPGYINFS[+79.966]YEVLTPLK.W		P[+32], S[+80]	939.46	3	2816.37	2816.35	0	5.2	17	NRagged	873.66	873.66	0	14.77	1703	>sp|P02817|AMELX_BOVIN Amelogenin, X isoform OS=Bos taurus OX=9913 GN=AMELX PE=1 SV=2	1	hf1_10472_ebo_30_1_261219.ScanId;v=1;d1=20785.20785.3	controllerType=0 controllerNumber=1 scan=20785	43.9679
50147:3	1	S.M[+15.995]PLPPHPGHPGYINFS[+79.966]YEVLTPLK.W		M[+16], S[+80]	934.126	3	2800.36	2800.36	0	2.8	17	NRagged	1020.36	1020.36	41.27	17.16	1703	>sp|P02817|AMELX_BOVIN Amelogenin, X isoform OS=Bos taurus OX=9913 GN=AMELX PE=1 SV=2	1	hf1_10472_ebo_30_1_261219.ScanId;v=1;d1=36399.36399.3	controllerType=0 controllerNumber=1 scan=36399	73.5018
26116:3	1	S.M[+15.995]PLPPHPGHPGYINFS[+79.966]YEVLTPLK.W		M[+16], S[+80]	934.128	3	2800.37	2800.36	0	4.8	17	NRagged	1032.75	1032.75	56.12	17.77	1703	>sp|P02817|AMELX_BOVIN Amelogenin, X isoform OS=Bos taurus OX=9913 GN=AMELX PE=1 SV=2	1	hf1_10472_ebo_30_1_261219.ScanId;v=1;d1=20116.20116.3	controllerType=0 controllerNumber=1 scan=20116	42.8291
26413:3	1	S.M[+15.995]PLPPHPGHPGYINFS[+79.966]YEVLTPLK.W		M[+16], S[+80]	934.129	3	2800.37	2800.36	0	5.1	17	NRagged	1051.57	1051.57	48.01	18.77	1703	>sp|P02817|AMELX_BOVIN Amelogenin, X isoform OS=Bos taurus OX=9913 GN=AMELX PE=1 SV=2	1	hf1_10472_ebo_30_1_261219.ScanId;v=1;d1=20323.20323.3	controllerType=0 controllerNumber=1 scan=20323	43.1821
26706:3	1	S.M[+15.995]PLPPHPGHPGYINFS[+79.966]YEVLTPLK.W		M[+16], S[+80]	934.129	3	2800.37	2800.36	0	6	17	NRagged	1087.21	1087.21	55.31	18.77	1703	>sp|P02817|AMELX_BOVIN Amelogenin, X isoform OS=Bos taurus OX=9913 GN=AMELX PE=1 SV=2	1	hf1_10472_ebo_30_1_261219.ScanId;v=1;d1=20528.20528.3	controllerType=0 controllerNumber=1 scan=20528	43.5357
28653:3	1	S.MPLPPHPGHPGYIN[+0.984]FS[+79.966]YEVLTPLK.W		N[+1], S[+80]	929.126	3	2785.36	2785.35	0	6.4	17	NRagged	1100.87	1100.87	519.66	19.71	1703	>sp|P02817|AMELX_BOVIN Amelogenin, X isoform OS=Bos taurus OX=9913 GN=AMELX PE=1 SV=2	1	hf1_10472_ebo_30_1_261219.ScanId;v=1;d1=21824.21824.3	controllerType=0 controllerNumber=1 scan=21824	45.7636
48209:3	1	S.MP[+15.995]LPPHPGHPGYIN[+0.984]FS[+79.966]YEVLTPLK.W		N[+1], P[+16], S[+80]	934.458	3	2801.36	2801.34	0	7.1	17	NRagged	118.6	118.6	4	2.77	1703	>sp|P02817|AMELX_BOVIN Amelogenin, X isoform OS=Bos taurus OX=9913 GN=AMELX PE=1 SV=2	1	hf1_10472_ebo_30_1_261219.ScanId;v=1;d1=34952.34952.3	controllerType=0 controllerNumber=1 scan=34952	70.3809
45145:3	1	S.M[+15.995]PLPPHPGHPGYIN[+0.984]FS[+79.966]YEVLTPLK.W		M[+16], N[+1], S[+80]	934.459	3	2801.36	2801.34	0	7.6	17	NRagged	140.32	140.32	32.71	2.87	1703	>sp|P02817|AMELX_BOVIN Amelogenin, X isoform OS=Bos taurus OX=9913 GN=AMELX PE=1 SV=2	1	hf1_10472_ebo_30_1_261219.ScanId;v=1;d1=32613.32613.3	controllerType=0 controllerNumber=1 scan=32613	65.3378
48607:3	1	S.MP[+15.995]LPPHPGHPGYIN[+0.984]FS[+79.966]YEVLTPLK.W		N[+1], P[+16], S[+80]	934.459	3	2801.36	2801.34	0	7.3	17	NRagged	166.98	166.98	4	3.86	1703	>sp|P02817|AMELX_BOVIN Amelogenin, X isoform OS=Bos taurus OX=9913 GN=AMELX PE=1 SV=2	1	hf1_10472_ebo_30_1_261219.ScanId;v=1;d1=35264.35264.3	controllerType=0 controllerNumber=1 scan=35264	71.0774
26856:3	1	S.MP[+15.995]LPPHPGHPGY[+31.990]INF[+31.990]SYEVLTPLK.W		F[+32], P[+16], Y[+32]	928.794	3	2784.37	2784.37	0	-0.9	17	NRagged	215.07	215.07	2.79	2.71	1703	>sp|P02817|AMELX_BOVIN Amelogenin, X isoform OS=Bos taurus OX=9913 GN=AMELX PE=1 SV=2	1	hf1_10472_ebo_30_1_261219.ScanId;v=1;d1=20629.20629.3	controllerType=0 controllerNumber=1 scan=20629	43.7073
47528:3	1	S.MP[+15.995]LPPHPGHPGYIN[+0.984]FS[+79.966]YEVLTPLK.W		N[+1], P[+16], S[+80]	934.458	3	2801.36	2801.34	0	7.2	17	NRagged	223.13	223.13	4	4.93	1703	>sp|P02817|AMELX_BOVIN Amelogenin, X isoform OS=Bos taurus OX=9913 GN=AMELX PE=1 SV=2	1	hf1_10472_ebo_30_1_261219.ScanId;v=1;d1=34449.34449.3	controllerType=0 controllerNumber=1 scan=34449	69.3544
25440:4	1	S.MP[+15.995]LPPHPGHPGYINF[+15.995]S[+79.966]YEVLTPLK.W		F[+16], P[+16], S[+80]	704.846	4	2816.36	2816.35	0	4.2	17	NRagged	290.72	290.72	15.8	4.84	1703	>sp|P02817|AMELX_BOVIN Amelogenin, X isoform OS=Bos taurus OX=9913 GN=AMELX PE=1 SV=2	1	hf1_10472_ebo_30_1_261219.ScanId;v=1;d1=19659.19659.6	controllerType=0 controllerNumber=1 scan=19659	42.0672
27773:4	1	S.MP[+31.990]LPPHPGHPGYIN[+0.984]FS[+79.966]YEVLTPLK.W		N[+1], P[+32], S[+80]	705.095	4	2817.36	2817.34	0	7.8	17	NRagged	311.58	311.58	12.47	5.38	1703	>sp|P02817|AMELX_BOVIN Amelogenin, X isoform OS=Bos taurus OX=9913 GN=AMELX PE=1 SV=2	1	hf1_10472_ebo_30_1_261219.ScanId;v=1;d1=21248.21248.4	controllerType=0 controllerNumber=1 scan=21248	44.7631
24319:3	1	S.M[+15.995]PLPPHPGHPGYINF[+15.995]S[+79.966]YEVLTPLK.W		F[+16], M[+16], S[+80]	939.457	3	2816.36	2816.35	0	1.8	17	NRagged	319.97	319.97	1.28	5.19	1703	>sp|P02817|AMELX_BOVIN Amelogenin, X isoform OS=Bos taurus OX=9913 GN=AMELX PE=1 SV=2	1	hf1_10472_ebo_30_1_261219.ScanId;v=1;d1=18906.18906.3	controllerType=0 controllerNumber=1 scan=18906	40.797
50165:4	1	S.MP[+15.995]LPPHPGH[+15.995]PGYINFS[+79.966]YEVLTPLK.W		H[+16], P[+16], S[+80]	704.848	4	2816.37	2816.35	0	6.3	17	NRagged	373.42	373.42	5.88	6.81	1703	>sp|P02817|AMELX_BOVIN Amelogenin, X isoform OS=Bos taurus OX=9913 GN=AMELX PE=1 SV=2	1	hf1_10472_ebo_30_1_261219.ScanId;v=1;d1=36412.36412.4	controllerType=0 controllerNumber=1 scan=36412	73.5241
26593:4	1	S.MP[+31.990]LPPHPGHPGYIN[+0.984]FS[+79.966]YEVLTPLK.W		N[+1], P[+32], S[+80]	705.093	4	2817.35	2817.34	0	4.9	17	NRagged	419.18	394.9	1.8	6.78	1703	>sp|P02817|AMELX_BOVIN Amelogenin, X isoform OS=Bos taurus OX=9913 GN=AMELX PE=1 SV=2	1	hf1_10472_ebo_30_1_261219.ScanId;v=1;d1=20452.20452.4	controllerType=0 controllerNumber=1 scan=20452	43.3998
24009:3	1	S.M[+15.995]PLPPHPGHPGYINFS[+79.966]YEVLTP[+15.995]LK.W		M[+16], P[+16], S[+80]	939.461	3	2816.37	2816.35	0	5.8	17	NRagged	505.11	505.11	14.67	7.29	1703	>sp|P02817|AMELX_BOVIN Amelogenin, X isoform OS=Bos taurus OX=9913 GN=AMELX PE=1 SV=2	1	hf1_10472_ebo_30_1_261219.ScanId;v=1;d1=18695.18695.3	controllerType=0 controllerNumber=1 scan=18695	40.4441
26918:4	1	S.M[+31.990]PLPPHPGHPGYIN[+0.984]FS[+79.966]YEVLTPLK.W		M[+32], N[+1], S[+80]	705.096	4	2817.36	2817.34	0	9.1	17	NRagged	559.72	559.72	0	6.61	1703	>sp|P02817|AMELX_BOVIN Amelogenin, X isoform OS=Bos taurus OX=9913 GN=AMELX PE=1 SV=2	1	hf1_10472_ebo_30_1_261219.ScanId;v=1;d1=20669.20669.4	controllerType=0 controllerNumber=1 scan=20669	43.7724
29030:3	1	S.M[+15.995]PLPPHP[+15.995]GHPGYINFS[+79.966]YEVLTPLK.W		M[+16], P[+16], S[+80]	939.461	3	2816.37	2816.35	0	6	17	NRagged	564.4	564.4	4.55	8.77	1703	>sp|P02817|AMELX_BOVIN Amelogenin, X isoform OS=Bos taurus OX=9913 GN=AMELX PE=1 SV=2	1	hf1_10472_ebo_30_1_261219.ScanId;v=1;d1=22063.22063.3	controllerType=0 controllerNumber=1 scan=22063	46.2082
26592:4	1	S.MP[+15.995]LPPHPGHP[+15.995]GYINFS[+79.966]YEVLTPLK.W		P[+16]*2, S[+80]	704.845	4	2816.36	2816.35	0	2	17	NRagged	568.92	568.92	1.09	7.79	1703	>sp|P02817|AMELX_BOVIN Amelogenin, X isoform OS=Bos taurus OX=9913 GN=AMELX PE=1 SV=2	1	hf1_10472_ebo_30_1_261219.ScanId;v=1;d1=20452.20452.4	controllerType=0 controllerNumber=1 scan=20452	43.3998
25689:4	1	S.M[+15.995]PLPPHPGHPGYINF[+15.995]S[+79.966]YEVLTPLK.W		F[+16], M[+16], S[+80]	704.847	4	2816.37	2816.35	0	5	17	NRagged	580.24	580.24	3.54	8.5	1703	>sp|P02817|AMELX_BOVIN Amelogenin, X isoform OS=Bos taurus OX=9913 GN=AMELX PE=1 SV=2	1	hf1_10472_ebo_30_1_261219.ScanId;v=1;d1=19827.19827.4	controllerType=0 controllerNumber=1 scan=19827	42.3491
50166:3	1	S.M[+15.995]PLPPHPGH[+15.995]PGYINFS[+79.966]YEVLTPLK.W		H[+16], M[+16], S[+80]	939.462	3	2816.37	2816.35	0	6.6	17	NRagged	602.08	602.08	6.9	9	1703	>sp|P02817|AMELX_BOVIN Amelogenin, X isoform OS=Bos taurus OX=9913 GN=AMELX PE=1 SV=2	1	hf1_10472_ebo_30_1_261219.ScanId;v=1;d1=36413.36413.3	controllerType=0 controllerNumber=1 scan=36413	73.5256
25641:3	1	S.M[+15.995]PLPPHPGHPGYINFS[+79.966]Y[+15.995]EVLTPLK.W		M[+16], S[+80], Y[+16]	939.46	3	2816.37	2816.35	0	5.2	17	NRagged	607.82	607.82	12.01	9.07	1703	>sp|P02817|AMELX_BOVIN Amelogenin, X isoform OS=Bos taurus OX=9913 GN=AMELX PE=1 SV=2	1	hf1_10472_ebo_30_1_261219.ScanId;v=1;d1=19794.19794.3	controllerType=0 controllerNumber=1 scan=19794	42.2941
28290:3	1	S.M[+15.995]PLPPHPGHPGYIN[+0.984]FS[+79.966]YEVLTPLK.W		M[+16], N[+1], S[+80]	934.461	3	2801.37	2801.34	0	9.3	17	NRagged	612.7	590.75	10.8	9.36	1703	>sp|P02817|AMELX_BOVIN Amelogenin, X isoform OS=Bos taurus OX=9913 GN=AMELX PE=1 SV=2	1	hf1_10472_ebo_30_1_261219.ScanId;v=1;d1=21592.21592.3	controllerType=0 controllerNumber=1 scan=21592	45.3616
26304:4	1	S.M[+15.995]PLPPHPGH[+15.995]PGYINFS[+79.966]YEVLTPLK.W		H[+16], M[+16], S[+80]	704.845	4	2816.36	2816.35	0	2.7	17	NRagged	645.49	645.49	9.32	8.88	1703	>sp|P02817|AMELX_BOVIN Amelogenin, X isoform OS=Bos taurus OX=9913 GN=AMELX PE=1 SV=2	1	hf1_10472_ebo_30_1_261219.ScanId;v=1;d1=20247.20247.4	controllerType=0 controllerNumber=1 scan=20247	43.0494
26974:4	1	S.M[+15.995]PLPPHPGHPGYIN[+0.984]FS[+79.966]YEVLTPLK.W		M[+16], N[+1], S[+80]	701.097	4	2801.37	2801.34	0	9	17	NRagged	645.61	600.96	7.45	9.09	1703	>sp|P02817|AMELX_BOVIN Amelogenin, X isoform OS=Bos taurus OX=9913 GN=AMELX PE=1 SV=2	1	hf1_10472_ebo_30_1_261219.ScanId;v=1;d1=20704.20704.4	controllerType=0 controllerNumber=1 scan=20704	43.8348
27568:4	1	S.MP[+15.995]LPPHPGHPGYIN[+0.984]FS[+79.966]YEVLTPLK.W		N[+1], P[+16], S[+80]	701.096	4	2801.36	2801.34	0	7.1	17	NRagged	652.25	625.77	2.2	10.43	1703	>sp|P02817|AMELX_BOVIN Amelogenin, X isoform OS=Bos taurus OX=9913 GN=AMELX PE=1 SV=2	1	hf1_10472_ebo_30_1_261219.ScanId;v=1;d1=21110.21110.4	controllerType=0 controllerNumber=1 scan=21110	44.5275
27095:3	1	S.M[+31.990]PLPPHPGHPGYIN[+0.984]FS[+79.966]YEVLTPLK.W		M[+32], N[+1], S[+80]	939.792	3	2817.36	2817.34	0	9.5	17	NRagged	691.49	662.05	5.63	10.36	1703	>sp|P02817|AMELX_BOVIN Amelogenin, X isoform OS=Bos taurus OX=9913 GN=AMELX PE=1 SV=2	1	hf1_10472_ebo_30_1_261219.ScanId;v=1;d1=20785.20785.3	controllerType=0 controllerNumber=1 scan=20785	43.9679
27282:4	1	S.MP[+15.995]LPPHPGHPGYIN[+0.984]FS[+79.966]YEVLTPLK.W		N[+1], P[+16], S[+80]	701.095	4	2801.36	2801.34	0	6.7	17	NRagged	711.79	711.79	4	11.43	1703	>sp|P02817|AMELX_BOVIN Amelogenin, X isoform OS=Bos taurus OX=9913 GN=AMELX PE=1 SV=2	1	hf1_10472_ebo_30_1_261219.ScanId;v=1;d1=20914.20914.4	controllerType=0 controllerNumber=1 scan=20914	44.1876
26010:4	1	S.MP[+15.995]LPPHPGHP[+15.995]GYINFS[+79.966]YEVLTPLK.W		P[+16]*2, S[+80]	704.847	4	2816.37	2816.35	0	5	17	NRagged	713.7	713.7	2	11.5	1703	>sp|P02817|AMELX_BOVIN Amelogenin, X isoform OS=Bos taurus OX=9913 GN=AMELX PE=1 SV=2	1	hf1_10472_ebo_30_1_261219.ScanId;v=1;d1=20044.20044.4	controllerType=0 controllerNumber=1 scan=20044	42.7026
25213:3	1	S.M[+15.995]PLPPHPGHPGYINFS[+79.966]Y[+15.995]EVLTPLK.W		M[+16], S[+80], Y[+16]	939.461	3	2816.37	2816.35	0	5.4	17	NRagged	724.08	724.08	3.17	11.77	1703	>sp|P02817|AMELX_BOVIN Amelogenin, X isoform OS=Bos taurus OX=9913 GN=AMELX PE=1 SV=2	1	hf1_10472_ebo_30_1_261219.ScanId;v=1;d1=19512.19512.3	controllerType=0 controllerNumber=1 scan=19512	41.8176
26269:3	1	S.M[+15.995]PLPPH[+15.995]PGHPGYINFS[+79.966]YEVLTPLK.W		H[+16], M[+16], S[+80]	939.459	3	2816.36	2816.35	0	3.9	17	NRagged	814.73	814.73	11.5	13.16	1703	>sp|P02817|AMELX_BOVIN Amelogenin, X isoform OS=Bos taurus OX=9913 GN=AMELX PE=1 SV=2	1	hf1_10472_ebo_30_1_261219.ScanId;v=1;d1=20221.20221.3	controllerType=0 controllerNumber=1 scan=20221	43.0044
27619:3	1	S.M[+15.995]PLPPHPGHPGYIN[+0.984]FS[+79.966]YEVLTPLK.W		M[+16], N[+1], S[+80]	934.459	3	2801.36	2801.34	0	8	17	NRagged	975.09	975.09	42.83	16.71	1703	>sp|P02817|AMELX_BOVIN Amelogenin, X isoform OS=Bos taurus OX=9913 GN=AMELX PE=1 SV=2	1	hf1_10472_ebo_30_1_261219.ScanId;v=1;d1=21143.21143.3	controllerType=0 controllerNumber=1 scan=21143	44.5846
25962:3	1	S.M[+15.995]PLPPHPGHP[+15.995]GYINFS[+79.966]YEVLTPLK.W		M[+16], P[+16], S[+80]	939.46	3	2816.37	2816.35	0	5	17	NRagged	985.92	985.92	8.31	16.77	1703	>sp|P02817|AMELX_BOVIN Amelogenin, X isoform OS=Bos taurus OX=9913 GN=AMELX PE=1 SV=2	1	hf1_10472_ebo_30_1_261219.ScanId;v=1;d1=20010.20010.3	controllerType=0 controllerNumber=1 scan=20010	42.65
27025:3	1	S.M[+15.995]PLPPHPGHPGYIN[+0.984]FS[+79.966]YEVLTPLK.W		M[+16], N[+1], S[+80]	934.459	3	2801.36	2801.34	0	7.7	17	NRagged	1010.66	1010.66	39.48	17.71	1703	>sp|P02817|AMELX_BOVIN Amelogenin, X isoform OS=Bos taurus OX=9913 GN=AMELX PE=1 SV=2	1	hf1_10472_ebo_30_1_261219.ScanId;v=1;d1=20738.20738.3	controllerType=0 controllerNumber=1 scan=20738	43.8886
27334:3	1	S.M[+15.995]PLPPHPGHPGYIN[+0.984]FS[+79.966]YEVLTPLK.W		M[+16], N[+1], S[+80]	934.458	3	2801.36	2801.34	0	7	17	NRagged	1024.9	1024.9	58.2	17.71	1703	>sp|P02817|AMELX_BOVIN Amelogenin, X isoform OS=Bos taurus OX=9913 GN=AMELX PE=1 SV=2	1	hf1_10472_ebo_30_1_261219.ScanId;v=1;d1=20946.20946.3	controllerType=0 controllerNumber=1 scan=20946	44.2422
50713:4	1	S.MP[+15.995]LP[+15.995]PHPGHPGY[+31.990]INF[+31.990]SYEVLTPLK.W		F[+32], P[+16]*2, Y[+32]	700.848	4	2800.37	2800.37	0	2.1	17	NRagged	34.81	34.81	0	2.21	1703	>sp|P02817|AMELX_BOVIN Amelogenin, X isoform OS=Bos taurus OX=9913 GN=AMELX PE=1 SV=2	1	hf1_10472_ebo_30_1_261219.ScanId;v=1;d1=37358.37358.4	controllerType=0 controllerNumber=1 scan=37358	77.8411
44811:4	1	S.MP[+15.995]LP[+15.995]PHPGHP[+31.990]GYINF[+31.990]SYEVLTPLK.W		F[+32], P[+16]*2[+32]	700.848	4	2800.37	2800.37	0	1.9	17	NRagged	61.99	61.99	0	2.27	1703	>sp|P02817|AMELX_BOVIN Amelogenin, X isoform OS=Bos taurus OX=9913 GN=AMELX PE=1 SV=2	1	hf1_10472_ebo_30_1_261219.ScanId;v=1;d1=32347.32347.4	controllerType=0 controllerNumber=1 scan=32347	64.7832
45210:4	1	S.MP[+15.995]LP[+31.990]P[+31.990]HPGHPGYINFSY[+15.995]EVLTPLK.W		P[+16][+32]*2, Y[+16]	700.849	4	2800.37	2800.37	0	3	17	NRagged	90.39	90.39	0	2.28	1703	>sp|P02817|AMELX_BOVIN Amelogenin, X isoform OS=Bos taurus OX=9913 GN=AMELX PE=1 SV=2	1	hf1_10472_ebo_30_1_261219.ScanId;v=1;d1=32673.32673.4	controllerType=0 controllerNumber=1 scan=32673	65.4692
50639:4	1	S.MP[+15.995]LP[+15.995]PHPGHPGY[+31.990]INF[+31.990]SYEVLTPLK.W		F[+32], P[+16]*2, Y[+32]	700.848	4	2800.37	2800.37	0	1.7	17	NRagged	92.83	92.83	0	2.3	1703	>sp|P02817|AMELX_BOVIN Amelogenin, X isoform OS=Bos taurus OX=9913 GN=AMELX PE=1 SV=2	1	hf1_10472_ebo_30_1_261219.ScanId;v=1;d1=37270.37270.4	controllerType=0 controllerNumber=1 scan=37270	77.4961
45422:4	1	S.MP[+15.995]LP[+31.990]P[+15.995]HPGHPGYINF[+31.990]SYEVLTPLK.W		F[+32], P[+16]*2[+32]	700.848	4	2800.37	2800.37	0	1.3	17	NRagged	93.41	93.41	0	2.27	1703	>sp|P02817|AMELX_BOVIN Amelogenin, X isoform OS=Bos taurus OX=9913 GN=AMELX PE=1 SV=2	1	hf1_10472_ebo_30_1_261219.ScanId;v=1;d1=32846.32846.4	controllerType=0 controllerNumber=1 scan=32846	65.8199
00282:4	1	S.MP[+15.995]LPP[+15.995]HPGHPGY[+31.990]INF[+31.990]SYEVLTPLK.W		F[+32], P[+16]*2, Y[+32]	700.847	4	2800.37	2800.37	0	0.9	17	NRagged	94.71	94.71	0	2.3	1703	>sp|P02817|AMELX_BOVIN Amelogenin, X isoform OS=Bos taurus OX=9913 GN=AMELX PE=1 SV=2	1	hf1_10472_ebo_30_1_261219.ScanId;v=1;d1=692.692.4	controllerType=0 controllerNumber=1 scan=692	3.327
45047:4	1	S.MP[+15.995]LPPHP[+15.995]GHPGY[+31.990]INF[+31.990]SYEVLTPLK.W		F[+32], P[+16]*2, Y[+32]	700.844	4	2800.36	2800.37	0	-3.6	17	NRagged	119.85	119.85	0	2.01	1703	>sp|P02817|AMELX_BOVIN Amelogenin, X isoform OS=Bos taurus OX=9913 GN=AMELX PE=1 SV=2	1	hf1_10472_ebo_30_1_261219.ScanId;v=1;d1=32538.32538.4	controllerType=0 controllerNumber=1 scan=32538	65.191
50562:4	1	S.MP[+15.995]LP[+15.995]P[+31.990]HPGHPGYINF[+31.990]SYEVLTPLK.W		F[+32], P[+16]*2[+32]	700.847	4	2800.37	2800.37	0	0.6	17	NRagged	123.39	123.39	0	2.41	1703	>sp|P02817|AMELX_BOVIN Amelogenin, X isoform OS=Bos taurus OX=9913 GN=AMELX PE=1 SV=2	1	hf1_10472_ebo_30_1_261219.ScanId;v=1;d1=37178.37178.4	controllerType=0 controllerNumber=1 scan=37178	77.1535
50475:4	1	S.MP[+15.995]LP[+15.995]PHPGHP[+31.990]GYINF[+31.990]SYEVLTPLK.W		F[+32], P[+16]*2[+32]	700.847	4	2800.37	2800.37	0	1	17	NRagged	138.64	138.64	0	2.48	1703	>sp|P02817|AMELX_BOVIN Amelogenin, X isoform OS=Bos taurus OX=9913 GN=AMELX PE=1 SV=2	1	hf1_10472_ebo_30_1_261219.ScanId;v=1;d1=37084.37084.4	controllerType=0 controllerNumber=1 scan=37084	76.816
50418:4	1	S.MP[+15.995]LPPHPGHPGY[+31.990]INF[+31.990]SY[+15.995]EVLTPLK.W		F[+32], P[+16], Y[+16][+32]	700.846	4	2800.36	2800.37	0	-0.7	17	NRagged	145.84	145.84	2	2.35	1703	>sp|P02817|AMELX_BOVIN Amelogenin, X isoform OS=Bos taurus OX=9913 GN=AMELX PE=1 SV=2	1	hf1_10472_ebo_30_1_261219.ScanId;v=1;d1=37002.37002.4	controllerType=0 controllerNumber=1 scan=37002	76.4728
49045:3	1	S.M[+15.995]PLPPHPGHPGY[+31.990]INF[+31.990]SY[+15.995]EVLTPLK.W		F[+32], M[+16], Y[+16][+32]	934.128	3	2800.37	2800.37	0	1.7	17	NRagged	180.87	180.87	2	3.24	1703	>sp|P02817|AMELX_BOVIN Amelogenin, X isoform OS=Bos taurus OX=9913 GN=AMELX PE=1 SV=2	1	hf1_10472_ebo_30_1_261219.ScanId;v=1;d1=35588.35588.3	controllerType=0 controllerNumber=1 scan=35588	71.7644
24995:3	1	S.M[+15.995]PLPPHPGHPGY[+31.990]INF[+31.990]SY[+15.995]EVLTPLK.W		F[+32], M[+16], Y[+16][+32]	934.135	3	2800.39	2800.37	0	8.8	17	NRagged	234.85	234.85	0.51	3.08	1703	>sp|P02817|AMELX_BOVIN Amelogenin, X isoform OS=Bos taurus OX=9913 GN=AMELX PE=1 SV=2	1	hf1_10472_ebo_30_1_261219.ScanId;v=1;d1=19367.19367.3	controllerType=0 controllerNumber=1 scan=19367	41.5761
24047:4	1	S.M[+15.995]PLPPHPGHP[+15.995]GYINF[+31.990]SY[+31.990]EVLTPLK.W		F[+32], M[+16], P[+16], Y[+32]	700.848	4	2800.37	2800.37	0	2.5	17	NRagged	249.77	249.77	8.25	4.62	1703	>sp|P02817|AMELX_BOVIN Amelogenin, X isoform OS=Bos taurus OX=9913 GN=AMELX PE=1 SV=2	1	hf1_10472_ebo_30_1_261219.ScanId;v=1;d1=18719.18719.4	controllerType=0 controllerNumber=1 scan=18719	40.4837
28709:4	1	S.MPLPPHPGHP[+15.995]GY[+31.990]IN[+0.984]F[+31.990]SYEVLTPLK.W		F[+32], N[+1], P[+16], Y[+32]	697.099	4	2785.38	2785.35	0	7.6	17	NRagged	312.62	312.62	8.12	5.38	1703	>sp|P02817|AMELX_BOVIN Amelogenin, X isoform OS=Bos taurus OX=9913 GN=AMELX PE=1 SV=2	1	hf1_10472_ebo_30_1_261219.ScanId;v=1;d1=21856.21856.6	controllerType=0 controllerNumber=1 scan=21856	45.8196
32520:3	1	S.MPLPPHPGHPGYINFS[+79.966]YEVLTPLKW.Y		S[+80]	990.824	3	2970.46	2970.44	0	5.2	17	Non	262.91	64.08	64.08	3.93	1703	>sp|P02817|AMELX_BOVIN Amelogenin, X isoform OS=Bos taurus OX=9913 GN=AMELX PE=1 SV=2	1	hf1_10472_ebo_30_1_261219.ScanId;v=1;d1=24403.24403.3	controllerType=0 controllerNumber=1 scan=24403	50.4614
32686:3	1	S.MPLPPHPGHPGYINFS[+79.966]YEVLTPLKW.Y		S[+80]	990.824	3	2970.46	2970.44	0	6	17	Non	341.67	341.67	93.37	6.26	1703	>sp|P02817|AMELX_BOVIN Amelogenin, X isoform OS=Bos taurus OX=9913 GN=AMELX PE=1 SV=2	1	hf1_10472_ebo_30_1_261219.ScanId;v=1;d1=24517.24517.5	controllerType=0 controllerNumber=1 scan=24517	50.6682
29262:4	1	S.MP[+15.995]LPPHPGHPGYINFSYEVLTPLKW.Y		P[+16]	727.377	4	2906.49	2906.47	0	5.3	17	Non	438.33	438.33	4	7.02	1703	>sp|P02817|AMELX_BOVIN Amelogenin, X isoform OS=Bos taurus OX=9913 GN=AMELX PE=1 SV=2	1	hf1_10472_ebo_30_1_261219.ScanId;v=1;d1=22208.22208.4	controllerType=0 controllerNumber=1 scan=22208	46.4792
33158:3	1	S.MPLPPHPGHPGYINFS[+79.966]YEVLTPLKW.Y		S[+80]	990.826	3	2970.46	2970.44	0	7.4	17	Non	470.23	174.92	174.92	5.6	1703	>sp|P02817|AMELX_BOVIN Amelogenin, X isoform OS=Bos taurus OX=9913 GN=AMELX PE=1 SV=2	1	hf1_10472_ebo_30_1_261219.ScanId;v=1;d1=24833.24833.3	controllerType=0 controllerNumber=1 scan=24833	51.2346
33782:3	1	S.MPLPPHPGHPGYINFS[+79.966]YEVLTPLKW.Y		S[+80]	990.818	3	2970.44	2970.44	0	-0.4	17	Non	485.68	485.68	156.86	6.61	1703	>sp|P02817|AMELX_BOVIN Amelogenin, X isoform OS=Bos taurus OX=9913 GN=AMELX PE=1 SV=2	1	hf1_10472_ebo_30_1_261219.ScanId;v=1;d1=25256.25256.3	controllerType=0 controllerNumber=1 scan=25256	52.0226
32872:3	1	S.MPLPPHPGHPGYINFS[+79.966]YEVLTPLKW.Y		S[+80]	990.826	3	2970.46	2970.44	0	7.7	17	Non	750.17	750.17	327.56	12.91	1703	>sp|P02817|AMELX_BOVIN Amelogenin, X isoform OS=Bos taurus OX=9913 GN=AMELX PE=1 SV=2	1	hf1_10472_ebo_30_1_261219.ScanId;v=1;d1=24640.24640.3	controllerType=0 controllerNumber=1 scan=24640	50.8871
36273:4	1	S.MP[+15.995]LPPHP[+15.995]GHPGYINFSYEVLTPLKW.Y		P[+16]*2	731.37	4	2922.46	2922.46	0	-2.8	17	Non	210.85	210.85	4	3.2	1703	>sp|P02817|AMELX_BOVIN Amelogenin, X isoform OS=Bos taurus OX=9913 GN=AMELX PE=1 SV=2	1	hf1_10472_ebo_30_1_261219.ScanId;v=1;d1=26887.26887.2	controllerType=0 controllerNumber=1 scan=26887	55.0125
30964:4	1	S.MP[+15.995]LPPHPGHPGYINFS[+79.966]YEVLTPLKW.Y		P[+16], S[+80]	747.369	4	2986.45	2986.44	0	5.5	17	Non	281.01	281.01	17.89	5.65	1703	>sp|P02817|AMELX_BOVIN Amelogenin, X isoform OS=Bos taurus OX=9913 GN=AMELX PE=1 SV=2	1	hf1_10472_ebo_30_1_261219.ScanId;v=1;d1=23334.23334.4	controllerType=0 controllerNumber=1 scan=23334	48.5286
50151:4	1	S.MP[+15.995]LPPHPGHPGYINFS[+79.966]YEVLTPLKW.Y		P[+16], S[+80]	747.368	4	2986.45	2986.44	0	4.9	17	Non	295.55	295.55	14.06	5.82	1703	>sp|P02817|AMELX_BOVIN Amelogenin, X isoform OS=Bos taurus OX=9913 GN=AMELX PE=1 SV=2	1	hf1_10472_ebo_30_1_261219.ScanId;v=1;d1=36401.36401.4	controllerType=0 controllerNumber=1 scan=36401	73.5048
31768:4	1	S.MP[+15.995]LPPHPGHPGYINFS[+79.966]YEVLTPLKW.Y		P[+16], S[+80]	747.369	4	2986.45	2986.44	0	5.6	17	Non	397.13	397.13	4.34	6.93	1703	>sp|P02817|AMELX_BOVIN Amelogenin, X isoform OS=Bos taurus OX=9913 GN=AMELX PE=1 SV=2	1	hf1_10472_ebo_30_1_261219.ScanId;v=1;d1=23895.23895.4	controllerType=0 controllerNumber=1 scan=23895	49.5585
31482:4	1	S.MP[+15.995]LPPHPGHPGYINFS[+79.966]YEVLTPLKW.Y		P[+16], S[+80]	747.368	4	2986.45	2986.44	0	4.9	17	Non	407.12	407.12	5.25	7.12	1703	>sp|P02817|AMELX_BOVIN Amelogenin, X isoform OS=Bos taurus OX=9913 GN=AMELX PE=1 SV=2	1	hf1_10472_ebo_30_1_261219.ScanId;v=1;d1=23700.23700.4	controllerType=0 controllerNumber=1 scan=23700	49.2113
31217:4	1	S.MP[+15.995]LPPHPGHPGYINFS[+79.966]YEVLTPLKW.Y		P[+16], S[+80]	747.368	4	2986.45	2986.44	0	5.2	17	Non	455.63	455.63	13.27	6.95	1703	>sp|P02817|AMELX_BOVIN Amelogenin, X isoform OS=Bos taurus OX=9913 GN=AMELX PE=1 SV=2	1	hf1_10472_ebo_30_1_261219.ScanId;v=1;d1=23515.23515.4	controllerType=0 controllerNumber=1 scan=23515	48.8754
50181:3	1	S.M[+15.995]PLPPHPGHPGYINFS[+79.966]YEVLTPLKW.Y		M[+16], S[+80]	996.158	3	2986.46	2986.44	0	7.8	17	Non	649.66	649.66	20.75	9.91	1703	>sp|P02817|AMELX_BOVIN Amelogenin, X isoform OS=Bos taurus OX=9913 GN=AMELX PE=1 SV=2	1	hf1_10472_ebo_30_1_261219.ScanId;v=1;d1=36423.36423.3	controllerType=0 controllerNumber=1 scan=36423	73.5434
31620:3	1	S.M[+15.995]PLPPHPGHPGYINFS[+79.966]YEVLTPLKW.Y		M[+16], S[+80]	996.156	3	2986.45	2986.44	0	5.6	17	Non	691.08	691.08	10.33	10.27	1703	>sp|P02817|AMELX_BOVIN Amelogenin, X isoform OS=Bos taurus OX=9913 GN=AMELX PE=1 SV=2	1	hf1_10472_ebo_30_1_261219.ScanId;v=1;d1=23795.23795.5	controllerType=0 controllerNumber=1 scan=23795	49.383
30977:3	1	S.M[+15.995]PLPPHPGHPGYINFS[+79.966]YEVLTPLKW.Y		M[+16], S[+80]	996.159	3	2986.46	2986.44	0	8.5	17	Non	794.9	794.9	28.58	12.56	1703	>sp|P02817|AMELX_BOVIN Amelogenin, X isoform OS=Bos taurus OX=9913 GN=AMELX PE=1 SV=2	1	hf1_10472_ebo_30_1_261219.ScanId;v=1;d1=23343.23343.3	controllerType=0 controllerNumber=1 scan=23343	48.5449
31493:3	1	S.M[+15.995]PLPPHPGHPGYINFS[+79.966]YEVLTPLKW.Y		M[+16], S[+80]	996.155	3	2986.45	2986.44	0	5.3	17	Non	876.93	876.93	23.89	14.97	1703	>sp|P02817|AMELX_BOVIN Amelogenin, X isoform OS=Bos taurus OX=9913 GN=AMELX PE=1 SV=2	1	hf1_10472_ebo_30_1_261219.ScanId;v=1;d1=23711.23711.3	controllerType=0 controllerNumber=1 scan=23711	49.233
31225:3	1	S.M[+15.995]PLPPHPGHPGYINFS[+79.966]YEVLTPLKW.Y		M[+16], S[+80]	996.156	3	2986.45	2986.44	0	5.6	17	Non	944.21	944.21	34.84	15.97	1703	>sp|P02817|AMELX_BOVIN Amelogenin, X isoform OS=Bos taurus OX=9913 GN=AMELX PE=1 SV=2	1	hf1_10472_ebo_30_1_261219.ScanId;v=1;d1=23521.23521.3	controllerType=0 controllerNumber=1 scan=23521	48.8872
30008:4	1	S.M[+15.995]PLPPHPGHPGYINFS[+79.966]YEVLTPLKW[+15.995].Y		M[+16], S[+80], W[+16]	751.366	4	3002.44	3002.43	0	3.6	17	Non	228.22	138.87	3.53	2.27	1703	>sp|P02817|AMELX_BOVIN Amelogenin, X isoform OS=Bos taurus OX=9913 GN=AMELX PE=1 SV=2	1	hf1_10472_ebo_30_1_261219.ScanId;v=1;d1=22701.22701.4	controllerType=0 controllerNumber=1 scan=22701	47.3758
33437:3	1	S.MP[+15.995]LPPHPGHP[+31.990]GYINF[+31.990]SYEVLTPLKW.Y		F[+32], P[+16][+32]	990.812	3	2970.42	2970.45	0	-9.2	17	Non	231.81	231.81	0	2.49	1703	>sp|P02817|AMELX_BOVIN Amelogenin, X isoform OS=Bos taurus OX=9913 GN=AMELX PE=1 SV=2	1	hf1_10472_ebo_30_1_261219.ScanId;v=1;d1=25024.25024.3	controllerType=0 controllerNumber=1 scan=25024	51.5928
33129:4	1	S.MP[+15.995]LPPHPGHPGYINF[+31.990]SY[+31.990]EVLTPLKW.Y		F[+32], P[+16], Y[+32]	743.371	4	2970.46	2970.45	0	4.4	17	Non	233.05	233.05	0.45	3.99	1703	>sp|P02817|AMELX_BOVIN Amelogenin, X isoform OS=Bos taurus OX=9913 GN=AMELX PE=1 SV=2	1	hf1_10472_ebo_30_1_261219.ScanId;v=1;d1=24812.24812.4	controllerType=0 controllerNumber=1 scan=24812	51.1974
29788:4	1	S.M[+15.995]PLPPHPGHPGYINFS[+79.966]YEVLTPLKW[+15.995].Y		M[+16], S[+80], W[+16]	751.364	4	3002.43	3002.43	0	1.2	17	Non	244.4	110.74	4.17	2.55	1703	>sp|P02817|AMELX_BOVIN Amelogenin, X isoform OS=Bos taurus OX=9913 GN=AMELX PE=1 SV=2	1	hf1_10472_ebo_30_1_261219.ScanId;v=1;d1=22555.22555.6	controllerType=0 controllerNumber=1 scan=22555	47.1099
31036:3	1	S.MP[+15.995]LPPHPGHPGYINFS[+79.966]Y[+15.995]EVLTPLKW.Y		P[+16], S[+80], Y[+16]	1001.49	3	3002.45	3002.43	0	6.6	17	Non	250.34	108.22	2	3.25	1703	>sp|P02817|AMELX_BOVIN Amelogenin, X isoform OS=Bos taurus OX=9913 GN=AMELX PE=1 SV=2	1	hf1_10472_ebo_30_1_261219.ScanId;v=1;d1=23385.23385.3	controllerType=0 controllerNumber=1 scan=23385	48.628
32833:4	1	S.MPLPPHPGHP[+15.995]GYINF[+31.990]SY[+31.990]EVLTPLKW.Y		F[+32], P[+16], Y[+32]	743.374	4	2970.47	2970.45	0	7.7	17	Non	255.69	255.69	0	5.36	1703	>sp|P02817|AMELX_BOVIN Amelogenin, X isoform OS=Bos taurus OX=9913 GN=AMELX PE=1 SV=2	1	hf1_10472_ebo_30_1_261219.ScanId;v=1;d1=24615.24615.4	controllerType=0 controllerNumber=1 scan=24615	50.8439
32547:4	1	S.MP[+15.995]LPPHPGHPGYINF[+31.990]SY[+31.990]EVLTPLKW.Y		F[+32], P[+16], Y[+32]	743.37	4	2970.46	2970.45	0	2.7	17	Non	280.36	280.36	4.32	5.03	1703	>sp|P02817|AMELX_BOVIN Amelogenin, X isoform OS=Bos taurus OX=9913 GN=AMELX PE=1 SV=2	1	hf1_10472_ebo_30_1_261219.ScanId;v=1;d1=24422.24422.4	controllerType=0 controllerNumber=1 scan=24422	50.4951
29043:4	1	S.M[+15.995]PLPPHPGHPGYINFS[+79.966]YEVLTPLKW[+15.995].Y		M[+16], S[+80], W[+16]	751.366	4	3002.44	3002.43	0	3.6	17	Non	283.84	283.84	8.77	5.03	1703	>sp|P02817|AMELX_BOVIN Amelogenin, X isoform OS=Bos taurus OX=9913 GN=AMELX PE=1 SV=2	1	hf1_10472_ebo_30_1_261219.ScanId;v=1;d1=22071.22071.6	controllerType=0 controllerNumber=1 scan=22071	46.2231
29364:4	1	S.M[+15.995]PLPPHPGHPGYINFS[+79.966]YEVLTPLKW[+15.995].Y		M[+16], S[+80], W[+16]	751.367	4	3002.45	3002.43	0	4.8	17	Non	288.17	288.17	7.65	5.82	1703	>sp|P02817|AMELX_BOVIN Amelogenin, X isoform OS=Bos taurus OX=9913 GN=AMELX PE=1 SV=2	1	hf1_10472_ebo_30_1_261219.ScanId;v=1;d1=22273.22273.4	controllerType=0 controllerNumber=1 scan=22273	46.5971
32353:4	1	S.MP[+15.995]LPPHPGHPGYIN[+0.984]FS[+79.966]YEVLTPLKW.Y		N[+1], P[+16], S[+80]	747.615	4	2987.44	2987.42	0	5.6	17	Non	318.37	181.35	2.89	4.99	1703	>sp|P02817|AMELX_BOVIN Amelogenin, X isoform OS=Bos taurus OX=9913 GN=AMELX PE=1 SV=2	1	hf1_10472_ebo_30_1_261219.ScanId;v=1;d1=24295.24295.4	controllerType=0 controllerNumber=1 scan=24295	50.2703
32074:4	1	S.MP[+15.995]LPPHPGHPGYIN[+0.984]FS[+79.966]YEVLTPLKW.Y		N[+1], P[+16], S[+80]	747.615	4	2987.44	2987.42	0	5.7	17	Non	389.1	286.93	3.3	6.07	1703	>sp|P02817|AMELX_BOVIN Amelogenin, X isoform OS=Bos taurus OX=9913 GN=AMELX PE=1 SV=2	1	hf1_10472_ebo_30_1_261219.ScanId;v=1;d1=24099.24099.4	controllerType=0 controllerNumber=1 scan=24099	49.9157
30759:3	1	S.M[+15.995]PLPPHPGHPGY[+15.995]INFS[+79.966]YEVLTPLKW.Y		M[+16], S[+80], Y[+16]	1001.49	3	3002.44	3002.43	0	4.2	17	Non	455.34	455.34	8.34	7.32	1703	>sp|P02817|AMELX_BOVIN Amelogenin, X isoform OS=Bos taurus OX=9913 GN=AMELX PE=1 SV=2	1	hf1_10472_ebo_30_1_261219.ScanId;v=1;d1=23196.23196.3	controllerType=0 controllerNumber=1 scan=23196	48.2723
31926:3	1	S.M[+15.995]PLPPHPGHPGYIN[+0.984]FS[+79.966]YEVLTPLKW.Y		M[+16], N[+1], S[+80]	996.485	3	2987.44	2987.42	0	6.4	17	Non	519.51	337.18	4.86	6.34	1703	>sp|P02817|AMELX_BOVIN Amelogenin, X isoform OS=Bos taurus OX=9913 GN=AMELX PE=1 SV=2	1	hf1_10472_ebo_30_1_261219.ScanId;v=1;d1=23999.23999.5	controllerType=0 controllerNumber=1 scan=23999	49.74
32545:3	1	S.M[+15.995]PLPPHPGHPGYIN[+0.984]FS[+79.966]YEVLTPLKW.Y		M[+16], N[+1], S[+80]	996.484	3	2987.44	2987.42	0	6.2	17	Non	520.61	336.16	10.16	6.66	1703	>sp|P02817|AMELX_BOVIN Amelogenin, X isoform OS=Bos taurus OX=9913 GN=AMELX PE=1 SV=2	1	hf1_10472_ebo_30_1_261219.ScanId;v=1;d1=24421.24421.3	controllerType=0 controllerNumber=1 scan=24421	50.4936
32254:3	1	S.M[+15.995]PLPPHPGHPGYIN[+0.984]FS[+79.966]YEVLTPLKW.Y		M[+16], N[+1], S[+80]	996.485	3	2987.44	2987.42	0	6.5	17	Non	832.27	589.86	32.67	13.91	1703	>sp|P02817|AMELX_BOVIN Amelogenin, X isoform OS=Bos taurus OX=9913 GN=AMELX PE=1 SV=2	1	hf1_10472_ebo_30_1_261219.ScanId;v=1;d1=24225.24225.3	controllerType=0 controllerNumber=1 scan=24225	50.1472
31979:3	1	S.M[+15.995]PLPPHPGHPGYIN[+0.984]FS[+79.966]YEVLTPLKW.Y		M[+16], N[+1], S[+80]	996.485	3	2987.44	2987.42	0	6.6	17	Non	851.08	578.46	42.05	14.91	1703	>sp|P02817|AMELX_BOVIN Amelogenin, X isoform OS=Bos taurus OX=9913 GN=AMELX PE=1 SV=2	1	hf1_10472_ebo_30_1_261219.ScanId;v=1;d1=24035.24035.3	controllerType=0 controllerNumber=1 scan=24035	49.8025
33778:4	1	S.MPLP[+15.995]PHPGHP[+31.990]GY[+31.990]IN[+0.984]FSYEVLTPLKW.Y		N[+1], P[+16][+32], Y[+32]	743.616	4	2971.44	2971.43	0	3.6	17	Non	166.45	166.45	1.43	2.61	1703	>sp|P02817|AMELX_BOVIN Amelogenin, X isoform OS=Bos taurus OX=9913 GN=AMELX PE=1 SV=2	1	hf1_10472_ebo_30_1_261219.ScanId;v=1;d1=25254.25254.4	controllerType=0 controllerNumber=1 scan=25254	52.0195
34377:4	1	S.MPLPPHPGHPGYINFS[+79.966]YEVLTPLKWY.Q		S[+80]	784.137	4	3133.53	3133.5	0	6.8	17	Non	300.56	300.56	50.9	5.75	1703	>sp|P02817|AMELX_BOVIN Amelogenin, X isoform OS=Bos taurus OX=9913 GN=AMELX PE=1 SV=2	1	hf1_10472_ebo_30_1_261219.ScanId;v=1;d1=25652.25652.4	controllerType=0 controllerNumber=1 scan=25652	52.7525
31624:4	1	S.MP[+15.995]LPPHPGHPGYINFSYEVLTPLKWY.Q		P[+16]	768.136	4	3069.52	3069.53	0	-3.2	17	Non	314.75	265.13	5.5	4.53	1703	>sp|P02817|AMELX_BOVIN Amelogenin, X isoform OS=Bos taurus OX=9913 GN=AMELX PE=1 SV=2	1	hf1_10472_ebo_30_1_261219.ScanId;v=1;d1=23797.23797.4	controllerType=0 controllerNumber=1 scan=23797	49.3861
34107:4	1	S.MPLPPHPGHPGYINFS[+79.966]YEVLTPLKWY.Q		S[+80]	784.137	4	3133.53	3133.5	0	6.9	17	Non	343.15	343.15	40.83	5.93	1703	>sp|P02817|AMELX_BOVIN Amelogenin, X isoform OS=Bos taurus OX=9913 GN=AMELX PE=1 SV=2	1	hf1_10472_ebo_30_1_261219.ScanId;v=1;d1=25470.25470.4	controllerType=0 controllerNumber=1 scan=25470	52.4143
31337:4	1	S.MP[+15.995]LPPHPGHPGYINFSYEVLTPLKWY.Q		P[+16]	768.138	4	3069.53	3069.53	0	-0.7	17	Non	346.83	346.83	5.5	5.11	1703	>sp|P02817|AMELX_BOVIN Amelogenin, X isoform OS=Bos taurus OX=9913 GN=AMELX PE=1 SV=2	1	hf1_10472_ebo_30_1_261219.ScanId;v=1;d1=23599.23599.4	controllerType=0 controllerNumber=1 scan=23599	49.033
29576:4	1	S.M[+15.995]PLPPHPGHPGYINFSYEVLTPLKWY.Q		M[+16]	768.141	4	3069.54	3069.53	0	2.9	17	Non	358.17	286.28	11.87	5.31	1703	>sp|P02817|AMELX_BOVIN Amelogenin, X isoform OS=Bos taurus OX=9913 GN=AMELX PE=1 SV=2	1	hf1_10472_ebo_30_1_261219.ScanId;v=1;d1=22418.22418.4	controllerType=0 controllerNumber=1 scan=22418	46.8643
34429:3	1	S.MPLPPHPGHPGYINFS[+79.966]YEVLTPLKWY.Q		S[+80]	1045.18	3	3133.52	3133.5	0	5.5	17	Non	484.41	484.41	153.7	7.48	1703	>sp|P02817|AMELX_BOVIN Amelogenin, X isoform OS=Bos taurus OX=9913 GN=AMELX PE=1 SV=2	1	hf1_10472_ebo_30_1_261219.ScanId;v=1;d1=25688.25688.3	controllerType=0 controllerNumber=1 scan=25688	52.8217
35017:3	1	S.MPLPPHPGHPGYINFS[+79.966]YEVLTPLKWY.Q		S[+80]	1045.17	3	3133.5	3133.5	0	-2.1	17	Non	508.5	508.5	215.87	6.34	1703	>sp|P02817|AMELX_BOVIN Amelogenin, X isoform OS=Bos taurus OX=9913 GN=AMELX PE=1 SV=2	1	hf1_10472_ebo_30_1_261219.ScanId;v=1;d1=26071.26071.3	controllerType=0 controllerNumber=1 scan=26071	53.5338
30185:4	1	S.MP[+15.995]LPPHPGHPGYINFSYEVLTPLKWY.Q		P[+16]	768.144	4	3069.55	3069.53	0	6.1	17	Non	511.37	511.37	4	7.11	1703	>sp|P02817|AMELX_BOVIN Amelogenin, X isoform OS=Bos taurus OX=9913 GN=AMELX PE=1 SV=2	1	hf1_10472_ebo_30_1_261219.ScanId;v=1;d1=22815.22815.4	controllerType=0 controllerNumber=1 scan=22815	47.584
34161:3	1	S.MPLPPHPGHPGYINFS[+79.966]YEVLTPLKWY.Q		S[+80]	1045.18	3	3133.53	3133.5	0	7.6	17	Non	782.17	782.17	326.74	12.91	1703	>sp|P02817|AMELX_BOVIN Amelogenin, X isoform OS=Bos taurus OX=9913 GN=AMELX PE=1 SV=2	1	hf1_10472_ebo_30_1_261219.ScanId;v=1;d1=25507.25507.3	controllerType=0 controllerNumber=1 scan=25507	52.4807
21653:4	1	S.MPLPPHPGHPGYINFSYEVLTP[+31.990]LKWY[+31.990].Q		P[+32], Y[+32]	780.133	4	3117.51	3117.52	0	-3	17	Non	123.49	123.49	0	1.5	1703	>sp|P02817|AMELX_BOVIN Amelogenin, X isoform OS=Bos taurus OX=9913 GN=AMELX PE=1 SV=2	1	hf1_10472_ebo_30_1_261219.ScanId;v=1;d1=17145.17145.4	controllerType=0 controllerNumber=1 scan=17145	37.8157
31448:3	1	S.MP[+15.995]LPPHPGHPGYINFS[+79.966]YEVLTPLKWY.Q		P[+16], S[+80]	1050.51	3	3149.52	3149.5	0	5.7	17	Non	169.47	169.47	4	2.57	1703	>sp|P02817|AMELX_BOVIN Amelogenin, X isoform OS=Bos taurus OX=9913 GN=AMELX PE=1 SV=2	1	hf1_10472_ebo_30_1_261219.ScanId;v=1;d1=23675.23675.3	controllerType=0 controllerNumber=1 scan=23675	49.167
32356:5	1	S.MP[+15.995]LPPHPGHPGYINFS[+79.966]YEVLTPLKWY.Q		P[+16], S[+80]	630.708	5	3149.51	3149.5	0	3.7	17	Non	177.23	177.23	4	2.64	1703	>sp|P02817|AMELX_BOVIN Amelogenin, X isoform OS=Bos taurus OX=9913 GN=AMELX PE=1 SV=2	1	hf1_10472_ebo_30_1_261219.ScanId;v=1;d1=24297.24297.5	controllerType=0 controllerNumber=1 scan=24297	50.2733
34950:4	1	S.MPLPPHPGHPGYIN[+0.984]FS[+79.966]YEVLTPLKWY.Q		N[+1], S[+80]	784.382	4	3134.51	3134.49	0	5.8	17	Non	224.62	224.62	33.56	3.99	1703	>sp|P02817|AMELX_BOVIN Amelogenin, X isoform OS=Bos taurus OX=9913 GN=AMELX PE=1 SV=2	1	hf1_10472_ebo_30_1_261219.ScanId;v=1;d1=26027.26027.4	controllerType=0 controllerNumber=1 scan=26027	53.4557
33251:4	1	S.MP[+15.995]LPPHPGHPGYINFS[+79.966]YEVLTPLKWY.Q		P[+16], S[+80]	788.134	4	3149.51	3149.5	0	4.6	17	Non	266.28	266.28	4	5.6	1703	>sp|P02817|AMELX_BOVIN Amelogenin, X isoform OS=Bos taurus OX=9913 GN=AMELX PE=1 SV=2	1	hf1_10472_ebo_30_1_261219.ScanId;v=1;d1=24895.24895.4	controllerType=0 controllerNumber=1 scan=24895	51.3451
32664:4	1	S.MP[+15.995]LPPHPGHPGYINFS[+79.966]YEVLTPLKWY.Q		P[+16], S[+80]	788.136	4	3149.52	3149.5	0	6.7	17	Non	296.07	296.07	17.25	5.75	1703	>sp|P02817|AMELX_BOVIN Amelogenin, X isoform OS=Bos taurus OX=9913 GN=AMELX PE=1 SV=2	1	hf1_10472_ebo_30_1_261219.ScanId;v=1;d1=24501.24501.4	controllerType=0 controllerNumber=1 scan=24501	50.6393
32375:4	1	S.MP[+15.995]LPPHPGHPGYINFS[+79.966]YEVLTPLKWY.Q		P[+16], S[+80]	788.135	4	3149.52	3149.5	0	6.3	17	Non	312.52	312.52	4	5.75	1703	>sp|P02817|AMELX_BOVIN Amelogenin, X isoform OS=Bos taurus OX=9913 GN=AMELX PE=1 SV=2	1	hf1_10472_ebo_30_1_261219.ScanId;v=1;d1=24310.24310.4	controllerType=0 controllerNumber=1 scan=24310	50.2978
30808:4	1	S.MP[+15.995]LPPHPGHPGYIN[+0.984]FSYEVLTPLKWY.Q		N[+1], P[+16]	768.39	4	3070.54	3070.52	0	6.8	17	Non	390.99	390.99	5.5	7.01	1703	>sp|P02817|AMELX_BOVIN Amelogenin, X isoform OS=Bos taurus OX=9913 GN=AMELX PE=1 SV=2	1	hf1_10472_ebo_30_1_261219.ScanId;v=1;d1=23230.23230.4	controllerType=0 controllerNumber=1 scan=23230	48.3322
33156:3	1	S.M[+15.995]PLPPHPGHPGYINFS[+79.966]YEVLTPLKWY.Q		M[+16], S[+80]	1050.51	3	3149.52	3149.5	0	5.8	17	Non	799.9	799.9	19.19	12.97	1703	>sp|P02817|AMELX_BOVIN Amelogenin, X isoform OS=Bos taurus OX=9913 GN=AMELX PE=1 SV=2	1	hf1_10472_ebo_30_1_261219.ScanId;v=1;d1=24832.24832.3	controllerType=0 controllerNumber=1 scan=24832	51.2331
32281:3	1	S.M[+15.995]PLPPHPGHPGYINFS[+79.966]YEVLTPLKWY.Q		M[+16], S[+80]	1050.51	3	3149.52	3149.5	0	6.3	17	Non	862.48	862.48	20.65	14.91	1703	>sp|P02817|AMELX_BOVIN Amelogenin, X isoform OS=Bos taurus OX=9913 GN=AMELX PE=1 SV=2	1	hf1_10472_ebo_30_1_261219.ScanId;v=1;d1=24245.24245.3	controllerType=0 controllerNumber=1 scan=24245	50.1835
32573:3	1	S.M[+15.995]PLPPHPGHPGYINFS[+79.966]YEVLTPLKWY.Q		M[+16], S[+80]	1050.51	3	3149.52	3149.5	0	6	17	Non	864	864	16.72	14.97	1703	>sp|P02817|AMELX_BOVIN Amelogenin, X isoform OS=Bos taurus OX=9913 GN=AMELX PE=1 SV=2	1	hf1_10472_ebo_30_1_261219.ScanId;v=1;d1=24438.24438.3	controllerType=0 controllerNumber=1 scan=24438	50.5247
32864:3	1	S.M[+15.995]PLPPHPGHPGYINFS[+79.966]YEVLTPLKWY.Q		M[+16], S[+80]	1050.51	3	3149.52	3149.5	0	6.3	17	Non	889.95	889.95	23.94	14.91	1703	>sp|P02817|AMELX_BOVIN Amelogenin, X isoform OS=Bos taurus OX=9913 GN=AMELX PE=1 SV=2	1	hf1_10472_ebo_30_1_261219.ScanId;v=1;d1=24635.24635.3	controllerType=0 controllerNumber=1 scan=24635	50.8796
50062:4	1	S.MPLPPHPGHPGY[+15.995]INF[+31.990]SY[+31.990]EVLTPLKWY.Q		F[+32], Y[+16][+32]	784.135	4	3133.52	3133.51	0	1.6	17	Non	69.32	69.32	23.66	1.45	1703	>sp|P02817|AMELX_BOVIN Amelogenin, X isoform OS=Bos taurus OX=9913 GN=AMELX PE=1 SV=2	1	hf1_10472_ebo_30_1_261219.ScanId;v=1;d1=36337.36337.4	controllerType=0 controllerNumber=1 scan=36337	73.394
50108:4	1	S.MP[+15.995]LPPHPGHPGYIN[+0.984]FS[+79.966]YEVLTPLKWY.Q		N[+1], P[+16], S[+80]	788.383	4	3150.51	3150.48	0	7.9	17	Non	100.78	100.78	4	2.31	1703	>sp|P02817|AMELX_BOVIN Amelogenin, X isoform OS=Bos taurus OX=9913 GN=AMELX PE=1 SV=2	1	hf1_10472_ebo_30_1_261219.ScanId;v=1;d1=36371.36371.4	controllerType=0 controllerNumber=1 scan=36371	73.4538
34842:4	1	S.MP[+15.995]LPPHPGHPGYIN[+0.984]FS[+79.966]YEVLTPLKWY.Q		N[+1], P[+16], S[+80]	788.38	4	3150.5	3150.48	0	4.8	17	Non	116.64	116.64	5.8	1.32	1703	>sp|P02817|AMELX_BOVIN Amelogenin, X isoform OS=Bos taurus OX=9913 GN=AMELX PE=1 SV=2	1	hf1_10472_ebo_30_1_261219.ScanId;v=1;d1=25954.25954.4	controllerType=0 controllerNumber=1 scan=25954	53.3169
33375:4	1	S.MP[+31.990]LPPHPGHPGYIN[+0.984]FS[+79.966]YEVLTPLKWY.Q		N[+1], P[+32], S[+80]	792.381	4	3166.5	3166.48	0	7.2	17	Non	129.63	129.63	1.8	1.48	1703	>sp|P02817|AMELX_BOVIN Amelogenin, X isoform OS=Bos taurus OX=9913 GN=AMELX PE=1 SV=2	1	hf1_10472_ebo_30_1_261219.ScanId;v=1;d1=24980.24980.4	controllerType=0 controllerNumber=1 scan=24980	51.5101
30958:3	1	S.MP[+15.995]LPPHPGHPGYINFS[+79.966]YEVLTPLKW[+15.995]Y.Q		P[+16], S[+80], W[+16]	1055.84	3	3165.52	3165.49	0	6.6	17	Non	156.12	72.59	0	1.43	1703	>sp|P02817|AMELX_BOVIN Amelogenin, X isoform OS=Bos taurus OX=9913 GN=AMELX PE=1 SV=2	1	hf1_10472_ebo_30_1_261219.ScanId;v=1;d1=23330.23330.3	controllerType=0 controllerNumber=1 scan=23330	48.5225
32689:3	1	S.MP[+15.995]LPPHPGH[+15.995]PGYINFS[+79.966]YEVLTPLKWY.Q		H[+16], P[+16], S[+80]	1055.84	3	3165.51	3165.49	0	5.7	17	Non	164.92	164.92	4	2.57	1703	>sp|P02817|AMELX_BOVIN Amelogenin, X isoform OS=Bos taurus OX=9913 GN=AMELX PE=1 SV=2	1	hf1_10472_ebo_30_1_261219.ScanId;v=1;d1=24518.24518.3	controllerType=0 controllerNumber=1 scan=24518	50.6697
31276:4	1	S.MP[+15.995]LPPHPGHPGYINFS[+79.966]YEVLTPLKW[+15.995]Y.Q		P[+16], S[+80], W[+16]	792.132	4	3165.51	3165.49	0	3.9	17	Non	170.38	170.38	4.44	2.61	1703	>sp|P02817|AMELX_BOVIN Amelogenin, X isoform OS=Bos taurus OX=9913 GN=AMELX PE=1 SV=2	1	hf1_10472_ebo_30_1_261219.ScanId;v=1;d1=23558.23558.4	controllerType=0 controllerNumber=1 scan=23558	48.957
29693:4	1	S.MP[+15.995]LPPHPGHPGYINFS[+79.966]YEVLTPLKW[+15.995]Y.Q		P[+16], S[+80], W[+16]	792.134	4	3165.52	3165.49	0	6.7	17	Non	193.11	193.11	4	3.02	1703	>sp|P02817|AMELX_BOVIN Amelogenin, X isoform OS=Bos taurus OX=9913 GN=AMELX PE=1 SV=2	1	hf1_10472_ebo_30_1_261219.ScanId;v=1;d1=22493.22493.4	controllerType=0 controllerNumber=1 scan=22493	46.9966
29972:4	1	S.M[+15.995]PLPPHPGHPGYINFS[+79.966]YEVLTPLKW[+15.995]Y.Q		M[+16], S[+80], W[+16]	792.133	4	3165.51	3165.49	0	5	17	Non	198.39	198.39	9	3.08	1703	>sp|P02817|AMELX_BOVIN Amelogenin, X isoform OS=Bos taurus OX=9913 GN=AMELX PE=1 SV=2	1	hf1_10472_ebo_30_1_261219.ScanId;v=1;d1=22679.22679.4	controllerType=0 controllerNumber=1 scan=22679	47.3369
32516:4	1	S.M[+15.995]PLPPHPGHPGYINF[+15.995]S[+79.966]YEVLTPLKWY.Q		F[+16], M[+16], S[+80]	792.133	4	3165.51	3165.49	0	4.9	17	Non	198.6	198.6	3.86	3.08	1703	>sp|P02817|AMELX_BOVIN Amelogenin, X isoform OS=Bos taurus OX=9913 GN=AMELX PE=1 SV=2	1	hf1_10472_ebo_30_1_261219.ScanId;v=1;d1=24401.24401.4	controllerType=0 controllerNumber=1 scan=24401	50.4583
33826:4	1	S.MP[+15.995]LPPHPGHPGYINF[+31.990]SY[+31.990]EVLTPLKWY.Q		F[+32], P[+16], Y[+32]	784.133	4	3133.51	3133.51	0	-0.4	17	Non	199.57	199.57	5.8	2.88	1703	>sp|P02817|AMELX_BOVIN Amelogenin, X isoform OS=Bos taurus OX=9913 GN=AMELX PE=1 SV=2	1	hf1_10472_ebo_30_1_261219.ScanId;v=1;d1=25284.25284.4	controllerType=0 controllerNumber=1 scan=25284	52.0724
33374:4	1	S.MP[+15.995]LPPHPGHPGY[+15.995]INFS[+79.966]YEVLTPLKWY.Q		P[+16], S[+80], Y[+16]	792.131	4	3165.5	3165.49	0	3	17	Non	210.32	210.32	0.97	2.84	1703	>sp|P02817|AMELX_BOVIN Amelogenin, X isoform OS=Bos taurus OX=9913 GN=AMELX PE=1 SV=2	1	hf1_10472_ebo_30_1_261219.ScanId;v=1;d1=24980.24980.4	controllerType=0 controllerNumber=1 scan=24980	51.5101
32799:4	1	S.MP[+15.995]LPPHPGHPGYINFS[+79.966]Y[+15.995]EVLTPLKWY.Q		P[+16], S[+80], Y[+16]	792.131	4	3165.5	3165.49	0	2.6	17	Non	217.08	217.08	0.93	2.84	1703	>sp|P02817|AMELX_BOVIN Amelogenin, X isoform OS=Bos taurus OX=9913 GN=AMELX PE=1 SV=2	1	hf1_10472_ebo_30_1_261219.ScanId;v=1;d1=24593.24593.4	controllerType=0 controllerNumber=1 scan=24593	50.8057
34070:4	1	S.MP[+15.995]LPPHPGHPGYIN[+0.984]FS[+79.966]YEVLTPLKWY.Q		N[+1], P[+16], S[+80]	788.382	4	3150.51	3150.48	0	7.3	17	Non	219.88	219.88	5.8	3.32	1703	>sp|P02817|AMELX_BOVIN Amelogenin, X isoform OS=Bos taurus OX=9913 GN=AMELX PE=1 SV=2	1	hf1_10472_ebo_30_1_261219.ScanId;v=1;d1=25446.25446.4	controllerType=0 controllerNumber=1 scan=25446	52.37
33088:4	1	S.M[+15.995]PLPPHPGHPGY[+15.995]INFS[+79.966]YEVLTPLKWY.Q		M[+16], S[+80], Y[+16]	792.13	4	3165.5	3165.49	0	1.2	17	Non	239.63	239.63	7.24	2.77	1703	>sp|P02817|AMELX_BOVIN Amelogenin, X isoform OS=Bos taurus OX=9913 GN=AMELX PE=1 SV=2	1	hf1_10472_ebo_30_1_261219.ScanId;v=1;d1=24788.24788.4	controllerType=0 controllerNumber=1 scan=24788	51.1564
34066:3	1	S.MP[+15.995]LPPHPGHPGYIN[+0.984]FS[+79.966]YEVLTPLKWY.Q		N[+1], P[+16], S[+80]	1050.84	3	3150.51	3150.48	0	7.1	17	Non	247.79	247.79	4	5.64	1703	>sp|P02817|AMELX_BOVIN Amelogenin, X isoform OS=Bos taurus OX=9913 GN=AMELX PE=1 SV=2	1	hf1_10472_ebo_30_1_261219.ScanId;v=1;d1=25444.25444.5	controllerType=0 controllerNumber=1 scan=25444	52.367
33030:3	1	S.M[+31.990]PLPPHPGHPGYIN[+0.984]FS[+79.966]YEVLTPLKWY.Q		M[+32], N[+1], S[+80]	1056.17	3	3166.51	3166.48	0	9.3	17	Non	250.61	250.61	0	4.66	1703	>sp|P02817|AMELX_BOVIN Amelogenin, X isoform OS=Bos taurus OX=9913 GN=AMELX PE=1 SV=2	1	hf1_10472_ebo_30_1_261219.ScanId;v=1;d1=24748.24748.3	controllerType=0 controllerNumber=1 scan=24748	51.0832
33322:3	1	S.MP[+15.995]LPP[+15.995]HPGHPGYINFS[+79.966]YEVLTPLKWY.Q		P[+16]*2, S[+80]	1055.84	3	3165.51	3165.49	0	4.5	17	Non	251.69	251.69	4	5.7	1703	>sp|P02817|AMELX_BOVIN Amelogenin, X isoform OS=Bos taurus OX=9913 GN=AMELX PE=1 SV=2	1	hf1_10472_ebo_30_1_261219.ScanId;v=1;d1=24943.24943.3	controllerType=0 controllerNumber=1 scan=24943	51.4361
33509:4	1	S.MP[+15.995]LPPHPGHPGYIN[+0.984]FS[+79.966]YEVLTPLKWY.Q		N[+1], P[+16], S[+80]	788.382	4	3150.51	3150.48	0	7	17	Non	260.02	260.02	4	5.53	1703	>sp|P02817|AMELX_BOVIN Amelogenin, X isoform OS=Bos taurus OX=9913 GN=AMELX PE=1 SV=2	1	hf1_10472_ebo_30_1_261219.ScanId;v=1;d1=25074.25074.4	controllerType=0 controllerNumber=1 scan=25074	51.6861
33788:4	1	S.MP[+15.995]LPPHPGHPGYIN[+0.984]FS[+79.966]YEVLTPLKWY.Q		N[+1], P[+16], S[+80]	788.382	4	3150.5	3150.48	0	6.6	17	Non	260.92	260.92	4	5.36	1703	>sp|P02817|AMELX_BOVIN Amelogenin, X isoform OS=Bos taurus OX=9913 GN=AMELX PE=1 SV=2	1	hf1_10472_ebo_30_1_261219.ScanId;v=1;d1=25260.25260.4	controllerType=0 controllerNumber=1 scan=25260	52.0314
30955:4	1	S.MP[+15.995]LPPHPGHPGYINFS[+79.966]YEVLTPLKW[+15.995]Y.Q		P[+16], S[+80], W[+16]	792.133	4	3165.51	3165.49	0	5.3	17	Non	279.6	279.6	5.8	5.43	1703	>sp|P02817|AMELX_BOVIN Amelogenin, X isoform OS=Bos taurus OX=9913 GN=AMELX PE=1 SV=2	1	hf1_10472_ebo_30_1_261219.ScanId;v=1;d1=23329.23329.4	controllerType=0 controllerNumber=1 scan=23329	48.521
31943:4	1	S.M[+15.995]PLPPHPGHP[+15.995]GYINFS[+79.966]YEVLTPLKWY.Q		M[+16], P[+16], S[+80]	792.133	4	3165.51	3165.49	0	5.5	17	Non	288.96	288.96	5.8	5.82	1703	>sp|P02817|AMELX_BOVIN Amelogenin, X isoform OS=Bos taurus OX=9913 GN=AMELX PE=1 SV=2	1	hf1_10472_ebo_30_1_261219.ScanId;v=1;d1=24009.24009.4	controllerType=0 controllerNumber=1 scan=24009	49.7574
34725:3	1	S.M[+15.995]PLPPHPGHPGYINF[+31.990]SY[+31.990]EVLTPLKWY.Q		F[+32], M[+16], Y[+32]	1045.17	3	3133.49	3133.51	0	-6.4	17	Non	311.19	311.19	2.07	4.49	1703	>sp|P02817|AMELX_BOVIN Amelogenin, X isoform OS=Bos taurus OX=9913 GN=AMELX PE=1 SV=2	1	hf1_10472_ebo_30_1_261219.ScanId;v=1;d1=25878.25878.3	controllerType=0 controllerNumber=1 scan=25878	53.1762
34664:4	1	S.MP[+15.995]LPPHPGHPGYINF[+31.990]SY[+31.990]EVLTPLKWY.Q		F[+32], P[+16], Y[+32]	784.132	4	3133.5	3133.51	0	-2.7	17	Non	311.24	311.24	5.8	4.82	1703	>sp|P02817|AMELX_BOVIN Amelogenin, X isoform OS=Bos taurus OX=9913 GN=AMELX PE=1 SV=2	1	hf1_10472_ebo_30_1_261219.ScanId;v=1;d1=25838.25838.4	controllerType=0 controllerNumber=1 scan=25838	53.1012
33776:3	1	S.MP[+15.995]LPPHPGHPGYIN[+0.984]FS[+79.966]YEVLTPLKWY.Q		N[+1], P[+16], S[+80]	1050.84	3	3150.51	3150.48	0	7.3	17	Non	345.85	345.85	4	6.19	1703	>sp|P02817|AMELX_BOVIN Amelogenin, X isoform OS=Bos taurus OX=9913 GN=AMELX PE=1 SV=2	1	hf1_10472_ebo_30_1_261219.ScanId;v=1;d1=25253.25253.5	controllerType=0 controllerNumber=1 scan=25253	52.018
34163:3	1	S.MP[+15.995]LPPHPGHPGYIN[+0.984]FS[+79.966]YEVLTPLKWY.Q		N[+1], P[+16], S[+80]	1050.84	3	3150.51	3150.48	0	9.6	17	Non	372.1	372.1	20.75	6.8	1703	>sp|P02817|AMELX_BOVIN Amelogenin, X isoform OS=Bos taurus OX=9913 GN=AMELX PE=1 SV=2	1	hf1_10472_ebo_30_1_261219.ScanId;v=1;d1=25508.25508.3	controllerType=0 controllerNumber=1 scan=25508	52.4822
32156:3	1	S.MP[+15.995]LPPHPGHPGYINF[+15.995]S[+79.966]YEVLTPLKWY.Q		F[+16], P[+16], S[+80]	1055.84	3	3165.51	3165.49	0	6.4	17	Non	444.01	444.01	0.71	7.12	1703	>sp|P02817|AMELX_BOVIN Amelogenin, X isoform OS=Bos taurus OX=9913 GN=AMELX PE=1 SV=2	1	hf1_10472_ebo_30_1_261219.ScanId;v=1;d1=24157.24157.3	controllerType=0 controllerNumber=1 scan=24157	50.0195
29871:3	1	S.MP[+15.995]LPPHPGHPGYINFS[+79.966]YEVLTPLKW[+15.995]Y.Q		P[+16], S[+80], W[+16]	1055.85	3	3165.52	3165.49	0	9.2	17	Non	483.02	483.02	4	7.07	1703	>sp|P02817|AMELX_BOVIN Amelogenin, X isoform OS=Bos taurus OX=9913 GN=AMELX PE=1 SV=2	1	hf1_10472_ebo_30_1_261219.ScanId;v=1;d1=22610.22610.5	controllerType=0 controllerNumber=1 scan=22610	47.2099
30776:3	1	S.MP[+15.995]LPPHPGHPGYINFS[+79.966]YEVLTPLKW[+15.995]Y.Q		P[+16], S[+80], W[+16]	1055.84	3	3165.52	3165.49	0	7.8	17	Non	592.96	592.96	0	8.2	1703	>sp|P02817|AMELX_BOVIN Amelogenin, X isoform OS=Bos taurus OX=9913 GN=AMELX PE=1 SV=2	1	hf1_10472_ebo_30_1_261219.ScanId;v=1;d1=23207.23207.3	controllerType=0 controllerNumber=1 scan=23207	48.2918
33157:3	1	S.M[+15.995]PLPPHPGHPGYIN[+0.984]FS[+79.966]YEVLTPLKWY.Q		M[+16], N[+1], S[+80]	1050.84	3	3150.51	3150.48	0	9.4	17	Non	755.43	754	29.63	12.56	1703	>sp|P02817|AMELX_BOVIN Amelogenin, X isoform OS=Bos taurus OX=9913 GN=AMELX PE=1 SV=2	1	hf1_10472_ebo_30_1_261219.ScanId;v=1;d1=24832.24832.3	controllerType=0 controllerNumber=1 scan=24832	51.2331
33421:3	1	S.M[+15.995]PLPPHPGHPGYIN[+0.984]FS[+79.966]YEVLTPLKWY.Q		M[+16], N[+1], S[+80]	1050.84	3	3150.51	3150.48	0	7.2	17	Non	852.41	852.41	20.45	14.91	1703	>sp|P02817|AMELX_BOVIN Amelogenin, X isoform OS=Bos taurus OX=9913 GN=AMELX PE=1 SV=2	1	hf1_10472_ebo_30_1_261219.ScanId;v=1;d1=25012.25012.3	controllerType=0 controllerNumber=1 scan=25012	51.5718
33689:3	1	S.M[+15.995]PLPPHPGHPGYIN[+0.984]FS[+79.966]YEVLTPLKWY.Q		M[+16], N[+1], S[+80]	1050.84	3	3150.51	3150.48	0	7.2	17	Non	868.31	868.31	23.43	14.91	1703	>sp|P02817|AMELX_BOVIN Amelogenin, X isoform OS=Bos taurus OX=9913 GN=AMELX PE=1 SV=2	1	hf1_10472_ebo_30_1_261219.ScanId;v=1;d1=25197.25197.3	controllerType=0 controllerNumber=1 scan=25197	51.9186
38285:4	1	S.MP[+15.995]LPPHP[+31.990]GHPGYINF[+31.990]SY[+15.995]EVLTPLKWY.Q		F[+32], P[+16][+32], Y[+16]	788.135	4	3149.52	3149.51	0	3	17	Non	101.19	101.19	0	1.52	1703	>sp|P02817|AMELX_BOVIN Amelogenin, X isoform OS=Bos taurus OX=9913 GN=AMELX PE=1 SV=2	1	hf1_10472_ebo_30_1_261219.ScanId;v=1;d1=28164.28164.4	controllerType=0 controllerNumber=1 scan=28164	57.3145
32841:4	1	S.MP[+15.995]LPPHPGHPGYIN[+0.984]FS[+79.966]Y[+31.990]EVLTPLKWY.Q		N[+1], P[+16], S[+80], Y[+32]	796.381	4	3182.5	3182.47	0	9.1	17	Non	158.6	158.6	4	2.31	1703	>sp|P02817|AMELX_BOVIN Amelogenin, X isoform OS=Bos taurus OX=9913 GN=AMELX PE=1 SV=2	1	hf1_10472_ebo_30_1_261219.ScanId;v=1;d1=24620.24620.4	controllerType=0 controllerNumber=1 scan=24620	50.8514
32961:4	1	S.MP[+15.995]LPPHPGHPGY[+15.995]INF[+31.990]SY[+31.990]EVLTPLKWY.Q		F[+32], P[+16], Y[+16][+32]	788.135	4	3149.52	3149.51	0	3	17	Non	264.66	264.66	4	4.81	1703	>sp|P02817|AMELX_BOVIN Amelogenin, X isoform OS=Bos taurus OX=9913 GN=AMELX PE=1 SV=2	1	hf1_10472_ebo_30_1_261219.ScanId;v=1;d1=24699.24699.4	controllerType=0 controllerNumber=1 scan=24699	50.9943
29513:3	1	S.MP[+15.995]LPPHPGHPGYINFSYEVLTPLKWYQ.S		P[+16]	1066.54	3	3197.61	3197.59	0	7.1	17	Non	186.58	186.58	4	3.27	1703	>sp|P02817|AMELX_BOVIN Amelogenin, X isoform OS=Bos taurus OX=9913 GN=AMELX PE=1 SV=2	1	hf1_10472_ebo_30_1_261219.ScanId;v=1;d1=22376.22376.5	controllerType=0 controllerNumber=1 scan=22376	46.7896
29390:4	1	S.MP[+15.995]LPPHPGHPGYINFSYEVLTPLKWYQ.S		P[+16]	800.158	4	3197.61	3197.59	0	5.7	17	Non	486.48	486.48	4	7.11	1703	>sp|P02817|AMELX_BOVIN Amelogenin, X isoform OS=Bos taurus OX=9913 GN=AMELX PE=1 SV=2	1	hf1_10472_ebo_30_1_261219.ScanId;v=1;d1=22291.22291.4	controllerType=0 controllerNumber=1 scan=22291	46.6328
31299:5	1	S.MP[+15.995]LPPHPGHPGYINFS[+79.966]YEVLTPLKWYQ.S		P[+16], S[+80]	656.319	5	3277.57	3277.56	0	3.2	17	Non	152.67	152.67	4	2.28	1703	>sp|P02817|AMELX_BOVIN Amelogenin, X isoform OS=Bos taurus OX=9913 GN=AMELX PE=1 SV=2	1	hf1_10472_ebo_30_1_261219.ScanId;v=1;d1=23574.23574.5	controllerType=0 controllerNumber=1 scan=23574	48.9868
31113:4	1	S.M[+15.995]PLPPHPGHPGYINFS[+79.966]YEVLTPLKWYQ.S		M[+16], S[+80]	820.152	4	3277.59	3277.56	0	9	17	Non	196.58	196.58	3.08	2.75	1703	>sp|P02817|AMELX_BOVIN Amelogenin, X isoform OS=Bos taurus OX=9913 GN=AMELX PE=1 SV=2	1	hf1_10472_ebo_30_1_261219.ScanId;v=1;d1=23438.23438.4	controllerType=0 controllerNumber=1 scan=23438	48.728
31641:4	1	S.M[+15.995]PLPPHPGHPGYINFS[+79.966]YEVLTPLKWYQ.S		M[+16], S[+80]	820.149	4	3277.57	3277.56	0	4.6	17	Non	287.5	287.5	6.55	5.83	1703	>sp|P02817|AMELX_BOVIN Amelogenin, X isoform OS=Bos taurus OX=9913 GN=AMELX PE=1 SV=2	1	hf1_10472_ebo_30_1_261219.ScanId;v=1;d1=23809.23809.4	controllerType=0 controllerNumber=1 scan=23809	49.4093
31365:4	1	S.M[+15.995]PLPPHPGHPGYINFS[+79.966]YEVLTPLKWYQ.S		M[+16], S[+80]	820.149	4	3277.58	3277.56	0	5.4	17	Non	316.64	316.64	6.75	5.83	1703	>sp|P02817|AMELX_BOVIN Amelogenin, X isoform OS=Bos taurus OX=9913 GN=AMELX PE=1 SV=2	1	hf1_10472_ebo_30_1_261219.ScanId;v=1;d1=23620.23620.4	controllerType=0 controllerNumber=1 scan=23620	49.073
29979:4	1	S.MP[+15.995]LPPHPGHPGYINFSYEVLTPLKWYQ[+0.984].S		P[+16], Q[+1]	800.405	4	3198.6	3198.58	0	6.8	17	Non	344.37	118.63	4	3.95	1703	>sp|P02817|AMELX_BOVIN Amelogenin, X isoform OS=Bos taurus OX=9913 GN=AMELX PE=1 SV=2	1	hf1_10472_ebo_30_1_261219.ScanId;v=1;d1=22684.22684.4	controllerType=0 controllerNumber=1 scan=22684	47.3473
30982:4	1	S.MP[+15.995]LPPHPGHPGYINFSYEVLTPLKWYQ[+0.984].S		P[+16], Q[+1]	800.4	4	3198.58	3198.58	0	0.4	17	Non	390.19	247.93	4	5.1	1703	>sp|P02817|AMELX_BOVIN Amelogenin, X isoform OS=Bos taurus OX=9913 GN=AMELX PE=1 SV=2	1	hf1_10472_ebo_30_1_261219.ScanId;v=1;d1=23345.23345.4	controllerType=0 controllerNumber=1 scan=23345	48.5479
30508:4	1	S.MP[+15.995]LPPHPGHPGYIN[+0.984]FSYEVLTPLKWYQ.S		N[+1], P[+16]	800.404	4	3198.59	3198.58	0	5.2	17	Non	406.24	269.36	5.8	5.85	1703	>sp|P02817|AMELX_BOVIN Amelogenin, X isoform OS=Bos taurus OX=9913 GN=AMELX PE=1 SV=2	1	hf1_10472_ebo_30_1_261219.ScanId;v=1;d1=23028.23028.4	controllerType=0 controllerNumber=1 scan=23028	47.9736
29682:4	1	S.MP[+15.995]LPPHPGHPGYINFSYEVLTPLKWYQ[+0.984].S		P[+16], Q[+1]	800.405	4	3198.6	3198.58	0	6.5	17	Non	411.95	232.97	4	5.58	1703	>sp|P02817|AMELX_BOVIN Amelogenin, X isoform OS=Bos taurus OX=9913 GN=AMELX PE=1 SV=2	1	hf1_10472_ebo_30_1_261219.ScanId;v=1;d1=22487.22487.4	controllerType=0 controllerNumber=1 scan=22487	46.9875
31636:3	1	S.M[+15.995]PLPPHPGHPGYINFS[+79.966]YEVLTPLKWYQ.S		M[+16], S[+80]	1093.2	3	3277.58	3277.56	0	6.2	17	Non	949.45	949.45	9.81	15.97	1703	>sp|P02817|AMELX_BOVIN Amelogenin, X isoform OS=Bos taurus OX=9913 GN=AMELX PE=1 SV=2	1	hf1_10472_ebo_30_1_261219.ScanId;v=1;d1=23805.23805.3	controllerType=0 controllerNumber=1 scan=23805	49.4005
31350:3	1	S.M[+15.995]PLPPHPGHPGYINFS[+79.966]YEVLTPLKWYQ.S		M[+16], S[+80]	1093.2	3	3277.58	3277.56	0	6.4	17	Non	1009.74	1009.74	8.71	17.91	1703	>sp|P02817|AMELX_BOVIN Amelogenin, X isoform OS=Bos taurus OX=9913 GN=AMELX PE=1 SV=2	1	hf1_10472_ebo_30_1_261219.ScanId;v=1;d1=23609.23609.3	controllerType=0 controllerNumber=1 scan=23609	49.0537
31446:4	1	S.M[+15.995]PLPPHPGHP[+15.995]GYINFS[+79.966]YEVLTPLKWYQ.S		M[+16], P[+16], S[+80]	824.147	4	3293.57	3293.55	0	4.4	17	Non	117.88	117.88	0.57	1.32	1703	>sp|P02817|AMELX_BOVIN Amelogenin, X isoform OS=Bos taurus OX=9913 GN=AMELX PE=1 SV=2	1	hf1_10472_ebo_30_1_261219.ScanId;v=1;d1=23674.23674.4	controllerType=0 controllerNumber=1 scan=23674	49.1655
30188:4	1	S.M[+15.995]PLPPHPGHPGYINFS[+79.966]YEVLTPLKW[+15.995]YQ.S		M[+16], S[+80], W[+16]	824.148	4	3293.57	3293.55	0	5	17	Non	133.77	133.77	0	1.55	1703	>sp|P02817|AMELX_BOVIN Amelogenin, X isoform OS=Bos taurus OX=9913 GN=AMELX PE=1 SV=2	1	hf1_10472_ebo_30_1_261219.ScanId;v=1;d1=22817.22817.5	controllerType=0 controllerNumber=1 scan=22817	47.587
31464:3	1	S.MP[+15.995]LPPHPGHPGYINF[+15.995]S[+79.966]YEVLTPLKWYQ.S		F[+16], P[+16], S[+80]	1098.52	3	3293.56	3293.55	0	1.8	17	Non	176.66	176.66	1.46	2.74	1703	>sp|P02817|AMELX_BOVIN Amelogenin, X isoform OS=Bos taurus OX=9913 GN=AMELX PE=1 SV=2	1	hf1_10472_ebo_30_1_261219.ScanId;v=1;d1=23686.23686.3	controllerType=0 controllerNumber=1 scan=23686	49.1864
33332:4	1	S.MP[+15.995]LPPHPGHPGYINF[+31.990]SY[+31.990]EVLTPLKWYQ.S		F[+32], P[+16], Y[+32]	816.147	4	3261.57	3261.57	0	-1.5	17	Non	198.76	198.76	3.58	2.88	1703	>sp|P02817|AMELX_BOVIN Amelogenin, X isoform OS=Bos taurus OX=9913 GN=AMELX PE=1 SV=2	1	hf1_10472_ebo_30_1_261219.ScanId;v=1;d1=24950.24950.4	controllerType=0 controllerNumber=1 scan=24950	51.4494
32515:4	1	S.MP[+15.995]LPPHPGHPGYIN[+0.984]FS[+79.966]YEVLTPLKWYQ.S		N[+1], P[+16], S[+80]	820.396	4	3278.56	3278.54	0	5.6	17	Non	199.44	192.76	4	3.67	1703	>sp|P02817|AMELX_BOVIN Amelogenin, X isoform OS=Bos taurus OX=9913 GN=AMELX PE=1 SV=2	1	hf1_10472_ebo_30_1_261219.ScanId;v=1;d1=24400.24400.4	controllerType=0 controllerNumber=1 scan=24400	50.4568
31154:3	1	S.M[+15.995]PLPPHPGHPGYINF[+15.995]S[+79.966]YEVLTPLKWYQ.S		F[+16], M[+16], S[+80]	1098.52	3	3293.54	3293.55	0	-3.4	17	Non	217.53	217.53	0.05	2.76	1703	>sp|P02817|AMELX_BOVIN Amelogenin, X isoform OS=Bos taurus OX=9913 GN=AMELX PE=1 SV=2	1	hf1_10472_ebo_30_1_261219.ScanId;v=1;d1=23467.23467.3	controllerType=0 controllerNumber=1 scan=23467	48.7802
32224:4	1	S.MP[+15.995]LPPHPGHPGYIN[+0.984]FS[+79.966]YEVLTPLKWYQ.S		N[+1], P[+16], S[+80]	820.396	4	3278.56	3278.54	0	5.6	17	Non	219.84	219.84	5.5	3.99	1703	>sp|P02817|AMELX_BOVIN Amelogenin, X isoform OS=Bos taurus OX=9913 GN=AMELX PE=1 SV=2	1	hf1_10472_ebo_30_1_261219.ScanId;v=1;d1=24205.24205.4	controllerType=0 controllerNumber=1 scan=24205	50.1124
33197:4	1	S.MP[+15.995]LPPHPGHPGYINFS[+79.966]YEVLTPLKWYQ[+0.984].S		P[+16], Q[+1], S[+80]	820.394	4	3278.55	3278.54	0	3.6	17	Non	220.57	170.92	4	3.1	1703	>sp|P02817|AMELX_BOVIN Amelogenin, X isoform OS=Bos taurus OX=9913 GN=AMELX PE=1 SV=2	1	hf1_10472_ebo_30_1_261219.ScanId;v=1;d1=24858.24858.4	controllerType=0 controllerNumber=1 scan=24858	51.2805
30845:4	1	S.MP[+15.995]LPPHPGHP[+15.995]GYINFS[+79.966]YEVLTPLKWYQ.S		P[+16]*2, S[+80]	824.15	4	3293.58	3293.55	0	7.2	17	Non	229.73	229.73	1.03	3.32	1703	>sp|P02817|AMELX_BOVIN Amelogenin, X isoform OS=Bos taurus OX=9913 GN=AMELX PE=1 SV=2	1	hf1_10472_ebo_30_1_261219.ScanId;v=1;d1=23256.23256.5	controllerType=0 controllerNumber=1 scan=23256	48.3799
31948:4	1	S.M[+15.995]PLPPHPGHPGYINFS[+79.966]YEVLTPLKWYQ[+0.984].S		M[+16], Q[+1], S[+80]	820.396	4	3278.56	3278.54	0	6.5	17	Non	278.28	274.77	5.21	5.53	1703	>sp|P02817|AMELX_BOVIN Amelogenin, X isoform OS=Bos taurus OX=9913 GN=AMELX PE=1 SV=2	1	hf1_10472_ebo_30_1_261219.ScanId;v=1;d1=24012.24012.4	controllerType=0 controllerNumber=1 scan=24012	49.761
32906:4	1	S.MP[+15.995]LPPHPGHPGYINFS[+79.966]YEVLTPLKWYQ[+0.984].S		P[+16], Q[+1], S[+80]	820.393	4	3278.55	3278.54	0	2.4	17	Non	287.09	235.12	4	4.87	1703	>sp|P02817|AMELX_BOVIN Amelogenin, X isoform OS=Bos taurus OX=9913 GN=AMELX PE=1 SV=2	1	hf1_10472_ebo_30_1_261219.ScanId;v=1;d1=24663.24663.4	controllerType=0 controllerNumber=1 scan=24663	50.9296
30871:3	1	S.M[+15.995]PLPPHPGHPGYINFS[+79.966]YEVLTPLK[+15.995]WYQ.S		K[+16], M[+16], S[+80]	1098.53	3	3293.57	3293.55	0	4.5	17	Non	433.68	433.68	2.18	7.26	1703	>sp|P02817|AMELX_BOVIN Amelogenin, X isoform OS=Bos taurus OX=9913 GN=AMELX PE=1 SV=2	1	hf1_10472_ebo_30_1_261219.ScanId;v=1;d1=23273.23273.3	controllerType=0 controllerNumber=1 scan=23273	48.4111
29899:3	1	S.M[+15.995]PLPPHPGHPGYINFS[+79.966]YEVLTPLKW[+15.995]YQ.S		M[+16], S[+80], W[+16]	1098.52	3	3293.56	3293.55	0	1.2	17	Non	469.76	469.76	2.65	6.62	1703	>sp|P02817|AMELX_BOVIN Amelogenin, X isoform OS=Bos taurus OX=9913 GN=AMELX PE=1 SV=2	1	hf1_10472_ebo_30_1_261219.ScanId;v=1;d1=22626.22626.3	controllerType=0 controllerNumber=1 scan=22626	47.237
29161:3	1	S.M[+15.995]PLPPHPGHPGYINFS[+79.966]YEVLTPLKW[+15.995]YQ.S		M[+16], S[+80], W[+16]	1098.53	3	3293.58	3293.55	0	7.7	17	Non	478.97	478.97	0.57	7.26	1703	>sp|P02817|AMELX_BOVIN Amelogenin, X isoform OS=Bos taurus OX=9913 GN=AMELX PE=1 SV=2	1	hf1_10472_ebo_30_1_261219.ScanId;v=1;d1=22144.22144.3	controllerType=0 controllerNumber=1 scan=22144	46.3594
32787:3	1	S.M[+15.995]PLPPHPGHPGYINFS[+79.966]YEVLTPLKWYQ[+0.984].S		M[+16], Q[+1], S[+80]	1093.52	3	3278.55	3278.54	0	3.8	17	Non	625.12	530.94	15.84	9.36	1703	>sp|P02817|AMELX_BOVIN Amelogenin, X isoform OS=Bos taurus OX=9913 GN=AMELX PE=1 SV=2	1	hf1_10472_ebo_30_1_261219.ScanId;v=1;d1=24586.24586.3	controllerType=0 controllerNumber=1 scan=24586	50.7924
33125:3	1	S.M[+15.995]PLPPHPGHPGYINFS[+79.966]YEVLTPLKWYQ[+0.984].S		M[+16], Q[+1], S[+80]	1093.52	3	3278.55	3278.54	0	2.1	17	Non	744.06	744.06	6.51	11.27	1703	>sp|P02817|AMELX_BOVIN Amelogenin, X isoform OS=Bos taurus OX=9913 GN=AMELX PE=1 SV=2	1	hf1_10472_ebo_30_1_261219.ScanId;v=1;d1=24810.24810.3	controllerType=0 controllerNumber=1 scan=24810	51.1944
32505:3	1	S.M[+15.995]PLPPHPGHPGYIN[+0.984]FS[+79.966]YEVLTPLKWYQ.S		M[+16], N[+1], S[+80]	1093.53	3	3278.56	3278.54	0	6.2	17	Non	847.58	742.87	38.36	13.91	1703	>sp|P02817|AMELX_BOVIN Amelogenin, X isoform OS=Bos taurus OX=9913 GN=AMELX PE=1 SV=2	1	hf1_10472_ebo_30_1_261219.ScanId;v=1;d1=24393.24393.3	controllerType=0 controllerNumber=1 scan=24393	50.4435
32207:3	1	S.M[+15.995]PLPPHPGHPGYIN[+0.984]FS[+79.966]YEVLTPLKWYQ.S		M[+16], N[+1], S[+80]	1093.53	3	3278.56	3278.54	0	6.7	17	Non	851.79	739.91	30.23	14.91	1703	>sp|P02817|AMELX_BOVIN Amelogenin, X isoform OS=Bos taurus OX=9913 GN=AMELX PE=1 SV=2	1	hf1_10472_ebo_30_1_261219.ScanId;v=1;d1=24195.24195.3	controllerType=0 controllerNumber=1 scan=24195	50.0948
31942:3	1	S.M[+15.995]PLPPHPGHPGYINFS[+79.966]YEVLTPLKWYQ[+0.984].S		M[+16], Q[+1], S[+80]	1093.53	3	3278.56	3278.54	0	6.4	17	Non	857.18	736.17	31.32	14.91	1703	>sp|P02817|AMELX_BOVIN Amelogenin, X isoform OS=Bos taurus OX=9913 GN=AMELX PE=1 SV=2	1	hf1_10472_ebo_30_1_261219.ScanId;v=1;d1=24008.24008.3	controllerType=0 controllerNumber=1 scan=24008	49.7563
29308:3	1	S.M[+15.995]PLPPHPGHPGYINFSYEVLTPLKWYQS.M		M[+16]	1095.55	3	3284.65	3284.62	0	7.1	17	Non	324.62	294.05	2.88	5.48	1703	>sp|P02817|AMELX_BOVIN Amelogenin, X isoform OS=Bos taurus OX=9913 GN=AMELX PE=1 SV=2	1	hf1_10472_ebo_30_1_261219.ScanId;v=1;d1=22237.22237.3	controllerType=0 controllerNumber=1 scan=22237	46.5314
29395:4	1	S.MP[+15.995]LPPHPGHPGYINFSYEVLTPLKWYQS.M		P[+16]	821.916	4	3284.64	3284.62	0	5.4	17	Non	414.32	324.19	4	5.38	1703	>sp|P02817|AMELX_BOVIN Amelogenin, X isoform OS=Bos taurus OX=9913 GN=AMELX PE=1 SV=2	1	hf1_10472_ebo_30_1_261219.ScanId;v=1;d1=22295.22295.4	controllerType=0 controllerNumber=1 scan=22295	46.6388
29385:3	1	S.M[+15.995]PLPPHPGHPGYINFSYEVLTPLKWYQS.M		M[+16]	1095.55	3	3284.63	3284.62	0	3	17	Non	424.28	386.28	0.85	6.12	1703	>sp|P02817|AMELX_BOVIN Amelogenin, X isoform OS=Bos taurus OX=9913 GN=AMELX PE=1 SV=2	1	hf1_10472_ebo_30_1_261219.ScanId;v=1;d1=22287.22287.3	controllerType=0 controllerNumber=1 scan=22287	46.6239
32584:3	1	S.MPLPPHPGHPGYIN[+0.984]FS[+79.966]YEVLTPLKWYQS.M		N[+1], S[+80]	1117.21	3	3349.6	3349.58	0	7	17	Non	164.16	164.16	52.87	2.72	1703	>sp|P02817|AMELX_BOVIN Amelogenin, X isoform OS=Bos taurus OX=9913 GN=AMELX PE=1 SV=2	1	hf1_10472_ebo_30_1_261219.ScanId;v=1;d1=24447.24447.3	controllerType=0 controllerNumber=1 scan=24447	50.5411
36348:3	1	S.MP[+15.995]LPPHPGHPGYINFSYEVLTP[+31.990]LKWYQS.M		P[+16][+32]	1106.21	3	3316.61	3316.61	0	-0.2	17	Non	180.21	134.89	4	1.34	1703	>sp|P02817|AMELX_BOVIN Amelogenin, X isoform OS=Bos taurus OX=9913 GN=AMELX PE=1 SV=2	1	hf1_10472_ebo_30_1_261219.ScanId;v=1;d1=26935.26935.3	controllerType=0 controllerNumber=1 scan=26935	55.0967
30900:3	1	S.MP[+15.995]LPPHPGHPGYINFSYEVLTPLKWYQ[+0.984]S.M		P[+16], Q[+1]	1095.87	3	3285.61	3285.61	0	0.2	17	Non	248.33	167.61	4	3.82	1703	>sp|P02817|AMELX_BOVIN Amelogenin, X isoform OS=Bos taurus OX=9913 GN=AMELX PE=1 SV=2	1	hf1_10472_ebo_30_1_261219.ScanId;v=1;d1=23292.23292.3	controllerType=0 controllerNumber=1 scan=23292	48.4482
31018:4	1	S.MP[+15.995]LPPHPGHPGYINFS[+79.966]YEVLTPLKWYQS.M		P[+16], S[+80]	841.908	4	3364.61	3364.59	0	6.3	17	Non	271.73	271.73	4	4.87	1703	>sp|P02817|AMELX_BOVIN Amelogenin, X isoform OS=Bos taurus OX=9913 GN=AMELX PE=1 SV=2	1	hf1_10472_ebo_30_1_261219.ScanId;v=1;d1=23370.23370.4	controllerType=0 controllerNumber=1 scan=23370	48.5969
31544:4	1	S.MP[+15.995]LPPHPGHPGYINFS[+79.966]YEVLTPLKWYQS.M		P[+16], S[+80]	841.907	4	3364.61	3364.59	0	4.8	17	Non	272.83	272.83	4	4.77	1703	>sp|P02817|AMELX_BOVIN Amelogenin, X isoform OS=Bos taurus OX=9913 GN=AMELX PE=1 SV=2	1	hf1_10472_ebo_30_1_261219.ScanId;v=1;d1=23743.23743.4	controllerType=0 controllerNumber=1 scan=23743	49.2877
30576:4	1	S.MP[+15.995]LPPHPGHPGYIN[+0.984]FSYEVLTPLKWYQS.M		N[+1], P[+16]	822.163	4	3285.63	3285.61	0	7.5	17	Non	295.46	187.09	4.47	4.43	1703	>sp|P02817|AMELX_BOVIN Amelogenin, X isoform OS=Bos taurus OX=9913 GN=AMELX PE=1 SV=2	1	hf1_10472_ebo_30_1_261219.ScanId;v=1;d1=23073.23073.4	controllerType=0 controllerNumber=1 scan=23073	48.0529
29684:4	1	S.MP[+15.995]LPPHPGHPGYINFSYEVLTPLKWYQ[+0.984]S.M		P[+16], Q[+1]	822.162	4	3285.63	3285.61	0	5.3	17	Non	331.57	242.68	11.97	5.13	1703	>sp|P02817|AMELX_BOVIN Amelogenin, X isoform OS=Bos taurus OX=9913 GN=AMELX PE=1 SV=2	1	hf1_10472_ebo_30_1_261219.ScanId;v=1;d1=22488.22488.4	controllerType=0 controllerNumber=1 scan=22488	46.989
31363:4	1	S.MP[+15.995]LPPHPGHPGYINFS[+79.966]YEVLTPLKWYQS.M		P[+16], S[+80]	841.908	4	3364.61	3364.59	0	5.9	17	Non	337.19	337.19	4	5.32	1703	>sp|P02817|AMELX_BOVIN Amelogenin, X isoform OS=Bos taurus OX=9913 GN=AMELX PE=1 SV=2	1	hf1_10472_ebo_30_1_261219.ScanId;v=1;d1=23618.23618.4	controllerType=0 controllerNumber=1 scan=23618	49.0673
31264:4	1	S.MP[+15.995]LPPHPGHPGYINFS[+79.966]YEVLTPLKWYQS.M		P[+16], S[+80]	841.909	4	3364.61	3364.59	0	6.7	17	Non	340.98	340.98	4	5.41	1703	>sp|P02817|AMELX_BOVIN Amelogenin, X isoform OS=Bos taurus OX=9913 GN=AMELX PE=1 SV=2	1	hf1_10472_ebo_30_1_261219.ScanId;v=1;d1=23549.23549.4	controllerType=0 controllerNumber=1 scan=23549	48.9408
31576:3	1	S.M[+15.995]PLPPHPGHPGYINFS[+79.966]YEVLTPLKWYQS.M		M[+16], S[+80]	1122.21	3	3364.61	3364.59	0	5.5	17	Non	877.49	877.49	8.06	14.31	1703	>sp|P02817|AMELX_BOVIN Amelogenin, X isoform OS=Bos taurus OX=9913 GN=AMELX PE=1 SV=2	1	hf1_10472_ebo_30_1_261219.ScanId;v=1;d1=23764.23764.3	controllerType=0 controllerNumber=1 scan=23764	49.3237
31041:3	1	S.M[+15.995]PLPPHPGHPGYINFS[+79.966]YEVLTPLKWYQS.M		M[+16], S[+80]	1122.21	3	3364.61	3364.59	0	6	17	Non	908.07	908.07	8.93	15.31	1703	>sp|P02817|AMELX_BOVIN Amelogenin, X isoform OS=Bos taurus OX=9913 GN=AMELX PE=1 SV=2	1	hf1_10472_ebo_30_1_261219.ScanId;v=1;d1=23388.23388.3	controllerType=0 controllerNumber=1 scan=23388	48.6326
31287:3	1	S.M[+15.995]PLPPHPGHPGYINFS[+79.966]YEVLTPLKWYQS.M		M[+16], S[+80]	1122.21	3	3364.61	3364.59	0	6.5	17	Non	965.26	965.26	11.72	16.25	1703	>sp|P02817|AMELX_BOVIN Amelogenin, X isoform OS=Bos taurus OX=9913 GN=AMELX PE=1 SV=2	1	hf1_10472_ebo_30_1_261219.ScanId;v=1;d1=23567.23567.3	controllerType=0 controllerNumber=1 scan=23567	48.9762
31666:4	1	S.M[+31.990]PLPPHPGHPGYIN[+0.984]FS[+79.966]YEVLTPLKWYQS.M		M[+32], N[+1], S[+80]	846.153	4	3381.59	3381.57	0	6.6	17	Non	109.34	109.34	0	1.43	1703	>sp|P02817|AMELX_BOVIN Amelogenin, X isoform OS=Bos taurus OX=9913 GN=AMELX PE=1 SV=2	1	hf1_10472_ebo_30_1_261219.ScanId;v=1;d1=23825.23825.4	controllerType=0 controllerNumber=1 scan=23825	49.4379
50129:4	1	S.MP[+15.995]LPPHPGHPGYINFS[+79.966]YEVLTPLKWYQ[+0.984]S.M		P[+16], Q[+1], S[+80]	842.154	4	3365.6	3365.57	0	6.4	17	Non	128.42	128.42	4	2.08	1703	>sp|P02817|AMELX_BOVIN Amelogenin, X isoform OS=Bos taurus OX=9913 GN=AMELX PE=1 SV=2	1	hf1_10472_ebo_30_1_261219.ScanId;v=1;d1=36387.36387.4	controllerType=0 controllerNumber=1 scan=36387	73.4819
32653:4	1	S.M[+15.995]PLPPHPGHPGYINF[+31.990]SY[+31.990]EVLTPLKWYQS.M		F[+32], M[+16], Y[+32]	837.909	4	3348.61	3348.6	0	2.9	17	Non	140.58	140.58	3.98	1.33	1703	>sp|P02817|AMELX_BOVIN Amelogenin, X isoform OS=Bos taurus OX=9913 GN=AMELX PE=1 SV=2	1	hf1_10472_ebo_30_1_261219.ScanId;v=1;d1=24494.24494.4	controllerType=0 controllerNumber=1 scan=24494	50.6261
29834:4	1	S.MP[+15.995]LPPHPGHPGYINFS[+79.966]YEVLTPLKW[+15.995]YQS.M		P[+16], S[+80], W[+16]	845.908	4	3380.61	3380.59	0	7.8	17	Non	195.62	152.45	0	2.08	1703	>sp|P02817|AMELX_BOVIN Amelogenin, X isoform OS=Bos taurus OX=9913 GN=AMELX PE=1 SV=2	1	hf1_10472_ebo_30_1_261219.ScanId;v=1;d1=22585.22585.5	controllerType=0 controllerNumber=1 scan=22585	47.1637
32127:4	1	S.MP[+15.995]LPPHPGHPGYIN[+0.984]FS[+79.966]YEVLTPLKWYQS.M		N[+1], P[+16], S[+80]	842.153	4	3365.59	3365.57	0	4.7	17	Non	197	197	4	3.06	1703	>sp|P02817|AMELX_BOVIN Amelogenin, X isoform OS=Bos taurus OX=9913 GN=AMELX PE=1 SV=2	1	hf1_10472_ebo_30_1_261219.ScanId;v=1;d1=24135.24135.4	controllerType=0 controllerNumber=1 scan=24135	49.9804
30965:3	1	S.MPLPPHPGHPGYIN[+0.984]F[+31.990]S[+79.966]YEVLTPLKWYQS.M		F[+32], N[+1], S[+80]	1127.87	3	3381.59	3381.57	0	6.5	17	Non	208.76	113.09	1.45	1.78	1703	>sp|P02817|AMELX_BOVIN Amelogenin, X isoform OS=Bos taurus OX=9913 GN=AMELX PE=1 SV=2	1	hf1_10472_ebo_30_1_261219.ScanId;v=1;d1=23335.23335.3	controllerType=0 controllerNumber=1 scan=23335	48.5301
31818:4	1	S.MP[+15.995]LPPHPGHPGYINFS[+79.966]YEVLTPLKWYQ[+0.984]S.M		P[+16], Q[+1], S[+80]	842.155	4	3365.6	3365.57	0	6.8	17	Non	240.95	240.95	4	4.7	1703	>sp|P02817|AMELX_BOVIN Amelogenin, X isoform OS=Bos taurus OX=9913 GN=AMELX PE=1 SV=2	1	hf1_10472_ebo_30_1_261219.ScanId;v=1;d1=23931.23931.4	controllerType=0 controllerNumber=1 scan=23931	49.6251
30895:4	1	S.MP[+15.995]LPPHPGHP[+15.995]GYINFS[+79.966]YEVLTPLKWYQS.M		P[+16]*2, S[+80]	845.907	4	3380.61	3380.59	0	6.6	17	Non	255.12	255.12	0.69	4.07	1703	>sp|P02817|AMELX_BOVIN Amelogenin, X isoform OS=Bos taurus OX=9913 GN=AMELX PE=1 SV=2	1	hf1_10472_ebo_30_1_261219.ScanId;v=1;d1=23290.23290.4	controllerType=0 controllerNumber=1 scan=23290	48.4451
29053:4	1	S.M[+15.995]PLPPHPGHPGYINFS[+79.966]YEVLTPLKW[+15.995]YQS.M		M[+16], S[+80], W[+16]	845.907	4	3380.61	3380.59	0	6.4	17	Non	278.94	278.94	4.29	4.7	1703	>sp|P02817|AMELX_BOVIN Amelogenin, X isoform OS=Bos taurus OX=9913 GN=AMELX PE=1 SV=2	1	hf1_10472_ebo_30_1_261219.ScanId;v=1;d1=22079.22079.4	controllerType=0 controllerNumber=1 scan=22079	46.2381
31009:3	1	S.M[+15.995]PLPPHPGHPGYINFS[+79.966]Y[+15.995]EVLTPLKWYQS.M		M[+16], S[+80], Y[+16]	1127.54	3	3380.6	3380.59	0	4.6	17	Non	362.74	362.74	3.56	6.36	1703	>sp|P02817|AMELX_BOVIN Amelogenin, X isoform OS=Bos taurus OX=9913 GN=AMELX PE=1 SV=2	1	hf1_10472_ebo_30_1_261219.ScanId;v=1;d1=23364.23364.4	controllerType=0 controllerNumber=1 scan=23364	48.5851
29579:3	1	S.MP[+15.995]LPPHPGHPGYINFS[+79.966]YEVLTPLKW[+15.995]YQS.M		P[+16], S[+80], W[+16]	1127.53	3	3380.59	3380.59	0	1.2	17	Non	404.09	404.09	4	5.89	1703	>sp|P02817|AMELX_BOVIN Amelogenin, X isoform OS=Bos taurus OX=9913 GN=AMELX PE=1 SV=2	1	hf1_10472_ebo_30_1_261219.ScanId;v=1;d1=22421.22421.3	controllerType=0 controllerNumber=1 scan=22421	46.8716
31782:3	1	S.MP[+15.995]LPPHPGHP[+15.995]GYINFS[+79.966]YEVLTPLKWYQS.M		P[+16]*2, S[+80]	1127.54	3	3380.59	3380.59	0	2.4	17	Non	485.63	485.63	4	6.21	1703	>sp|P02817|AMELX_BOVIN Amelogenin, X isoform OS=Bos taurus OX=9913 GN=AMELX PE=1 SV=2	1	hf1_10472_ebo_30_1_261219.ScanId;v=1;d1=23906.23906.3	controllerType=0 controllerNumber=1 scan=23906	49.5803
32714:3	1	S.MP[+15.995]LPPHPGHPGYINFS[+79.966]YEVLTPLKWYQ[+0.984]S.M		P[+16], Q[+1], S[+80]	1122.54	3	3365.59	3365.57	0	5	17	Non	547.12	391.43	4	6.83	1703	>sp|P02817|AMELX_BOVIN Amelogenin, X isoform OS=Bos taurus OX=9913 GN=AMELX PE=1 SV=2	1	hf1_10472_ebo_30_1_261219.ScanId;v=1;d1=24535.24535.3	controllerType=0 controllerNumber=1 scan=24535	50.7007
32424:3	1	S.M[+15.995]PLPPHPGHPGYIN[+0.984]FS[+79.966]YEVLTPLKWYQS.M		M[+16], N[+1], S[+80]	1122.54	3	3365.6	3365.57	0	7.6	17	Non	694.26	619.41	9.99	9.54	1703	>sp|P02817|AMELX_BOVIN Amelogenin, X isoform OS=Bos taurus OX=9913 GN=AMELX PE=1 SV=2	1	hf1_10472_ebo_30_1_261219.ScanId;v=1;d1=24342.24342.3	controllerType=0 controllerNumber=1 scan=24342	50.3556
32153:3	1	S.M[+15.995]PLPPHPGHPGYIN[+0.984]FS[+79.966]YEVLTPLKWYQS.M		M[+16], N[+1], S[+80]	1122.54	3	3365.59	3365.57	0	5.8	17	Non	852.52	771.76	22.8	14.31	1703	>sp|P02817|AMELX_BOVIN Amelogenin, X isoform OS=Bos taurus OX=9913 GN=AMELX PE=1 SV=2	1	hf1_10472_ebo_30_1_261219.ScanId;v=1;d1=24155.24155.3	controllerType=0 controllerNumber=1 scan=24155	50.0168
31855:3	1	S.M[+15.995]PLPPHPGHPGYINFS[+79.966]YEVLTPLKWYQ[+0.984]S.M		M[+16], Q[+1], S[+80]	1122.54	3	3365.6	3365.57	0	7	17	Non	934.55	874.08	23.33	15.25	1703	>sp|P02817|AMELX_BOVIN Amelogenin, X isoform OS=Bos taurus OX=9913 GN=AMELX PE=1 SV=2	1	hf1_10472_ebo_30_1_261219.ScanId;v=1;d1=23954.23954.3	controllerType=0 controllerNumber=1 scan=23954	49.6633
33095:4	1	S.MP[+15.995]LPPHPGHPGYINFSYEVLTPLKWYQSM.I		P[+16]	854.667	4	3415.64	3415.66	0	-5.7	17	Non	161.16	161.16	4	1.49	1703	>sp|P02817|AMELX_BOVIN Amelogenin, X isoform OS=Bos taurus OX=9913 GN=AMELX PE=1 SV=2	1	hf1_10472_ebo_30_1_261219.ScanId;v=1;d1=24792.24792.4	controllerType=0 controllerNumber=1 scan=24792	51.1621
33093:3	1	S.M[+15.995]PLPPHPGHPGYINFSYEVLTPLKWYQSM.I		M[+16]	1139.22	3	3415.64	3415.66	0	-7	17	Non	204.01	175.21	14.74	1.58	1703	>sp|P02817|AMELX_BOVIN Amelogenin, X isoform OS=Bos taurus OX=9913 GN=AMELX PE=1 SV=2	1	hf1_10472_ebo_30_1_261219.ScanId;v=1;d1=24790.24790.3	controllerType=0 controllerNumber=1 scan=24790	51.1595
34690:4	1	S.MPLPPHPGHPGYINFS[+79.966]Y[+15.995]EVLTPLKWYQSM.I		S[+80], Y[+16]	874.667	4	3495.65	3495.63	0	4.6	17	Non	203.27	203.27	1.13	2.81	1703	>sp|P02817|AMELX_BOVIN Amelogenin, X isoform OS=Bos taurus OX=9913 GN=AMELX PE=1 SV=2	1	hf1_10472_ebo_30_1_261219.ScanId;v=1;d1=25855.25855.4	controllerType=0 controllerNumber=1 scan=25855	53.1327
33018:4	1	S.MPLPPHPGHPGYINFS[+79.966]YEVLTPLKWYQSM[+15.995].I		M[+16], S[+80]	874.669	4	3495.65	3495.63	0	6.5	17	Non	382.45	382.45	63.75	6.2	1703	>sp|P02817|AMELX_BOVIN Amelogenin, X isoform OS=Bos taurus OX=9913 GN=AMELX PE=1 SV=2	1	hf1_10472_ebo_30_1_261219.ScanId;v=1;d1=24740.24740.4	controllerType=0 controllerNumber=1 scan=24740	51.069
35774:3	1	S.M[+15.995]PLPPHPGHPGYINFS[+79.966]YEVLTPLKWYQSM.I		M[+16], S[+80]	1165.88	3	3495.64	3495.63	0	1.5	17	Non	385.98	385.98	9.76	5.84	1703	>sp|P02817|AMELX_BOVIN Amelogenin, X isoform OS=Bos taurus OX=9913 GN=AMELX PE=1 SV=2	1	hf1_10472_ebo_30_1_261219.ScanId;v=1;d1=26567.26567.3	controllerType=0 controllerNumber=1 scan=26567	54.443
33586:3	1	S.MPLPPHPGHPGYINFS[+79.966]YEVLTPLKWYQSM[+15.995].I		M[+16], S[+80]	1165.88	3	3495.64	3495.63	0	1.3	17	Non	473.49	473.49	27.99	5.96	1703	>sp|P02817|AMELX_BOVIN Amelogenin, X isoform OS=Bos taurus OX=9913 GN=AMELX PE=1 SV=2	1	hf1_10472_ebo_30_1_261219.ScanId;v=1;d1=25128.25128.3	controllerType=0 controllerNumber=1 scan=25128	51.7852
33324:3	1	S.MPLPPHPGHPGYINFS[+79.966]YEVLTPLKWYQSM[+15.995].I		M[+16], S[+80]	1165.88	3	3495.64	3495.63	0	2	17	Non	557.54	557.54	58.52	6.13	1703	>sp|P02817|AMELX_BOVIN Amelogenin, X isoform OS=Bos taurus OX=9913 GN=AMELX PE=1 SV=2	1	hf1_10472_ebo_30_1_261219.ScanId;v=1;d1=24944.24944.3	controllerType=0 controllerNumber=1 scan=24944	51.4376
32752:3	1	S.MPLPPHPGHPGYINFS[+79.966]YEVLTPLKWYQSM[+15.995].I		M[+16], S[+80]	1165.89	3	3495.66	3495.63	0	7.6	17	Non	573.24	573.24	59.16	8.25	1703	>sp|P02817|AMELX_BOVIN Amelogenin, X isoform OS=Bos taurus OX=9913 GN=AMELX PE=1 SV=2	1	hf1_10472_ebo_30_1_261219.ScanId;v=1;d1=24560.24560.3	controllerType=0 controllerNumber=1 scan=24560	50.7492
34719:3	1	S.M[+15.995]PLPPHPGHPGYINFS[+79.966]YEVLTPLKWYQSM.I		M[+16], S[+80]	1165.89	3	3495.65	3495.63	0	4.7	17	Non	679.93	679.93	22	10.31	1703	>sp|P02817|AMELX_BOVIN Amelogenin, X isoform OS=Bos taurus OX=9913 GN=AMELX PE=1 SV=2	1	hf1_10472_ebo_30_1_261219.ScanId;v=1;d1=25875.25875.3	controllerType=0 controllerNumber=1 scan=25875	53.1717
33035:3	1	S.MPLPPHPGHPGYINFS[+79.966]YEVLTPLKWYQSM[+15.995].I		M[+16], S[+80]	1165.89	3	3495.66	3495.63	0	8	17	Non	781.3	781.3	66.81	12.25	1703	>sp|P02817|AMELX_BOVIN Amelogenin, X isoform OS=Bos taurus OX=9913 GN=AMELX PE=1 SV=2	1	hf1_10472_ebo_30_1_261219.ScanId;v=1;d1=24752.24752.3	controllerType=0 controllerNumber=1 scan=24752	51.092
45163:4	1	S.M[+15.995]PLPPHPGHPGYINFS[+79.966]YEVLTPLKWYQSM[+15.995].I		M[+16]*2, S[+80]	878.665	4	3511.64	3511.63	0	3.5	17	Non	53.32	53.32	0	1.5	1703	>sp|P02817|AMELX_BOVIN Amelogenin, X isoform OS=Bos taurus OX=9913 GN=AMELX PE=1 SV=2	1	hf1_10472_ebo_30_1_261219.ScanId;v=1;d1=32630.32630.4	controllerType=0 controllerNumber=1 scan=32630	65.3722
31742:5	1	S.M[+15.995]PLPPHPGHPGYINFS[+79.966]YEVLTPLKWYQSM[+15.995].I		M[+16]*2, S[+80]	703.135	5	3511.64	3511.63	0	5.2	17	Non	129.37	129.37	0	1.35	1703	>sp|P02817|AMELX_BOVIN Amelogenin, X isoform OS=Bos taurus OX=9913 GN=AMELX PE=1 SV=2	1	hf1_10472_ebo_30_1_261219.ScanId;v=1;d1=23878.23878.4	controllerType=0 controllerNumber=1 scan=23878	49.5305
30010:4	1	S.MP[+15.995]LPPHPGHPGYINFS[+79.966]YEVLTPLKWYQSM[+31.990].I		M[+32], P[+16], S[+80]	882.666	4	3527.64	3527.62	0	6.1	17	Non	151.05	151.05	0	2.26	1703	>sp|P02817|AMELX_BOVIN Amelogenin, X isoform OS=Bos taurus OX=9913 GN=AMELX PE=1 SV=2	1	hf1_10472_ebo_30_1_261219.ScanId;v=1;d1=22703.22703.4	controllerType=0 controllerNumber=1 scan=22703	47.3816
31386:3	1	S.M[+15.995]PLPPHPGHPGYINFS[+79.966]YEVLTPLKWYQSM[+31.990].I		M[+16][+32], S[+80]	1176.55	3	3527.63	3527.62	0	2	17	Non	162.4	162.4	0	2.38	1703	>sp|P02817|AMELX_BOVIN Amelogenin, X isoform OS=Bos taurus OX=9913 GN=AMELX PE=1 SV=2	1	hf1_10472_ebo_30_1_261219.ScanId;v=1;d1=23634.23634.3	controllerType=0 controllerNumber=1 scan=23634	49.0964
37245:4	1	S.MP[+15.995]LPPHPGHPGYINFS[+79.966]YEVLTPLKWYQ[+0.984]SM.I		P[+16], Q[+1], S[+80]	874.912	4	3496.63	3496.61	0	3.1	17	Non	196.75	134.01	15.73	1.33	1703	>sp|P02817|AMELX_BOVIN Amelogenin, X isoform OS=Bos taurus OX=9913 GN=AMELX PE=1 SV=2	1	hf1_10472_ebo_30_1_261219.ScanId;v=1;d1=27497.27497.4	controllerType=0 controllerNumber=1 scan=27497	56.1121
29287:3	1	S.M[+15.995]PLPPHPGHPGYINFS[+79.966]YEVLTPLKWY[+31.990]QSM.I		M[+16], S[+80], Y[+32]	1176.55	3	3527.64	3527.62	0	5.9	17	Non	216.75	216.75	0	3.62	1703	>sp|P02817|AMELX_BOVIN Amelogenin, X isoform OS=Bos taurus OX=9913 GN=AMELX PE=1 SV=2	1	hf1_10472_ebo_30_1_261219.ScanId;v=1;d1=22222.22222.3	controllerType=0 controllerNumber=1 scan=22222	46.5032
31329:4	1	S.M[+31.990]PLPPHPGHPGYINFS[+79.966]YEVLTPLKWYQSM[+15.995].I		M[+16][+32], S[+80]	882.664	4	3527.64	3527.62	0	4.4	17	Non	224.4	224.4	8.87	2.81	1703	>sp|P02817|AMELX_BOVIN Amelogenin, X isoform OS=Bos taurus OX=9913 GN=AMELX PE=1 SV=2	1	hf1_10472_ebo_30_1_261219.ScanId;v=1;d1=23595.23595.4	controllerType=0 controllerNumber=1 scan=23595	49.027
30322:4	1	S.MP[+15.995]LPPHPGHPGYINFS[+79.966]YEVLTP[+31.990]LKWYQSM.I		P[+16][+32], S[+80]	882.662	4	3527.63	3527.62	0	2	17	Non	233.01	233.01	5.8	2.76	1703	>sp|P02817|AMELX_BOVIN Amelogenin, X isoform OS=Bos taurus OX=9913 GN=AMELX PE=1 SV=2	1	hf1_10472_ebo_30_1_261219.ScanId;v=1;d1=22907.22907.4	controllerType=0 controllerNumber=1 scan=22907	47.7542
32160:5	1	S.M[+15.995]PLPPHPGHPGYINFS[+79.966]YEVLTPLKWYQSM[+15.995].I		M[+16]*2, S[+80]	703.131	5	3511.62	3511.63	0	-0.4	17	Non	241.94	241.94	0	3.35	1703	>sp|P02817|AMELX_BOVIN Amelogenin, X isoform OS=Bos taurus OX=9913 GN=AMELX PE=1 SV=2	1	hf1_10472_ebo_30_1_261219.ScanId;v=1;d1=24159.24159.5	controllerType=0 controllerNumber=1 scan=24159	50.0225
31563:5	1	S.M[+15.995]PLPPHPGHPGYINFS[+79.966]YEVLTPLKWYQSM[+15.995].I		M[+16]*2, S[+80]	703.135	5	3511.64	3511.63	0	5.2	17	Non	242.78	242.78	0	4.36	1703	>sp|P02817|AMELX_BOVIN Amelogenin, X isoform OS=Bos taurus OX=9913 GN=AMELX PE=1 SV=2	1	hf1_10472_ebo_30_1_261219.ScanId;v=1;d1=23755.23755.5	controllerType=0 controllerNumber=1 scan=23755	49.3075
33618:4	1	S.MPLPPHPGHPGYINFS[+79.966]YEVLTPLKWYQ[+0.984]SM[+15.995].I		M[+16], Q[+1], S[+80]	874.914	4	3496.63	3496.61	0	5.2	17	Non	245.98	238.28	56.28	3.93	1703	>sp|P02817|AMELX_BOVIN Amelogenin, X isoform OS=Bos taurus OX=9913 GN=AMELX PE=1 SV=2	1	hf1_10472_ebo_30_1_261219.ScanId;v=1;d1=25151.25151.4	controllerType=0 controllerNumber=1 scan=25151	51.8304
32525:4	1	S.MP[+15.995]LPPHPGHPGYINFS[+79.966]YEVLTPLKWYQSM[+31.990].I		M[+32], P[+16], S[+80]	882.661	4	3527.62	3527.62	0	0.5	17	Non	259.21	259.21	4	4.07	1703	>sp|P02817|AMELX_BOVIN Amelogenin, X isoform OS=Bos taurus OX=9913 GN=AMELX PE=1 SV=2	1	hf1_10472_ebo_30_1_261219.ScanId;v=1;d1=24406.24406.4	controllerType=0 controllerNumber=1 scan=24406	50.4656
29003:4	1	S.MP[+15.995]LPPHPGHPGYINFS[+79.966]YEVLTPLKWYQSM[+31.990].I		M[+32], P[+16], S[+80]	882.665	4	3527.64	3527.62	0	5.3	17	Non	297.33	297.33	0	5.16	1703	>sp|P02817|AMELX_BOVIN Amelogenin, X isoform OS=Bos taurus OX=9913 GN=AMELX PE=1 SV=2	1	hf1_10472_ebo_30_1_261219.ScanId;v=1;d1=22048.22048.4	controllerType=0 controllerNumber=1 scan=22048	46.1826
36284:4	1	S.MP[+15.995]LPPHPGHPGYINFS[+79.966]YEVLTPLKWYQ[+0.984]SM.I		P[+16], Q[+1], S[+80]	874.914	4	3496.63	3496.61	0	5.5	17	Non	302.57	283.73	10.56	4.99	1703	>sp|P02817|AMELX_BOVIN Amelogenin, X isoform OS=Bos taurus OX=9913 GN=AMELX PE=1 SV=2	1	hf1_10472_ebo_30_1_261219.ScanId;v=1;d1=26895.26895.4	controllerType=0 controllerNumber=1 scan=26895	55.0274
29721:4	1	S.MP[+15.995]LPPHPGHPGYINFS[+79.966]YEVLTPLKWYQSM[+31.990].I		M[+32], P[+16], S[+80]	882.661	4	3527.62	3527.62	0	0.6	17	Non	303.36	303.36	0	4.46	1703	>sp|P02817|AMELX_BOVIN Amelogenin, X isoform OS=Bos taurus OX=9913 GN=AMELX PE=1 SV=2	1	hf1_10472_ebo_30_1_261219.ScanId;v=1;d1=22514.22514.4	controllerType=0 controllerNumber=1 scan=22514	47.0368
33906:4	1	S.MPLPPHPGHPGYIN[+0.984]FS[+79.966]YEVLTPLKWYQSM[+15.995].I		M[+16], N[+1], S[+80]	874.914	4	3496.63	3496.61	0	5.2	17	Non	323.25	295.03	0.02	5.08	1703	>sp|P02817|AMELX_BOVIN Amelogenin, X isoform OS=Bos taurus OX=9913 GN=AMELX PE=1 SV=2	1	hf1_10472_ebo_30_1_261219.ScanId;v=1;d1=25340.25340.4	controllerType=0 controllerNumber=1 scan=25340	52.1752
31492:4	1	S.M[+15.995]PLPPHPGHPGYINFS[+79.966]YEVLTPLKWYQSM[+15.995].I		M[+16]*2, S[+80]	878.666	4	3511.64	3511.63	0	4.5	17	Non	336.1	336.1	0	5.34	1703	>sp|P02817|AMELX_BOVIN Amelogenin, X isoform OS=Bos taurus OX=9913 GN=AMELX PE=1 SV=2	1	hf1_10472_ebo_30_1_261219.ScanId;v=1;d1=23710.23710.4	controllerType=0 controllerNumber=1 scan=23710	49.232
35971:4	1	S.MP[+15.995]LPPHPGHPGYINFS[+79.966]YEVLTPLKWYQ[+0.984]SM.I		P[+16], Q[+1], S[+80]	874.915	4	3496.64	3496.61	0	6.3	17	Non	342.42	287.46	0.19	5.19	1703	>sp|P02817|AMELX_BOVIN Amelogenin, X isoform OS=Bos taurus OX=9913 GN=AMELX PE=1 SV=2	1	hf1_10472_ebo_30_1_261219.ScanId;v=1;d1=26699.26699.4	controllerType=0 controllerNumber=1 scan=26699	54.6793
31128:3	1	S.MP[+15.995]LPPHPGHPGYINFS[+79.966]YEVLTP[+31.990]LKWYQSM.I		P[+16][+32], S[+80]	1176.55	3	3527.64	3527.62	0	4.7	17	Non	357.24	357.24	4	5.61	1703	>sp|P02817|AMELX_BOVIN Amelogenin, X isoform OS=Bos taurus OX=9913 GN=AMELX PE=1 SV=2	1	hf1_10472_ebo_30_1_261219.ScanId;v=1;d1=23449.23449.3	controllerType=0 controllerNumber=1 scan=23449	48.7474
30065:3	1	S.M[+15.995]PLPPHPGHPGYINFS[+79.966]YEVLTPLKWYQSM[+31.990].I		M[+16][+32], S[+80]	1176.56	3	3527.65	3527.62	0	9.4	17	Non	392.08	392.08	0	6.14	1703	>sp|P02817|AMELX_BOVIN Amelogenin, X isoform OS=Bos taurus OX=9913 GN=AMELX PE=1 SV=2	1	hf1_10472_ebo_30_1_261219.ScanId;v=1;d1=22741.22741.3	controllerType=0 controllerNumber=1 scan=22741	47.4531
34168:3	1	S.MPLPPHPGHPGYIN[+0.984]FS[+79.966]YEVLTPLKWYQSM[+15.995].I		M[+16], N[+1], S[+80]	1166.22	3	3496.63	3496.61	0	5.4	17	Non	393.43	393.43	30.67	6.55	1703	>sp|P02817|AMELX_BOVIN Amelogenin, X isoform OS=Bos taurus OX=9913 GN=AMELX PE=1 SV=2	1	hf1_10472_ebo_30_1_261219.ScanId;v=1;d1=25510.25510.3	controllerType=0 controllerNumber=1 scan=25510	52.4853
31779:4	1	S.M[+15.995]PLPPHPGHPGYINFS[+79.966]YEVLTPLKWYQSM[+15.995].I		M[+16]*2, S[+80]	878.666	4	3511.64	3511.63	0	4.4	17	Non	425.91	425.91	0	6.32	1703	>sp|P02817|AMELX_BOVIN Amelogenin, X isoform OS=Bos taurus OX=9913 GN=AMELX PE=1 SV=2	1	hf1_10472_ebo_30_1_261219.ScanId;v=1;d1=23904.23904.4	controllerType=0 controllerNumber=1 scan=23904	49.5776
32026:3	1	S.M[+31.990]PLPPHPGHPGYINFS[+79.966]YEVLTPLKWYQSM[+15.995].I		M[+16][+32], S[+80]	1176.55	3	3527.62	3527.62	0	0.5	17	Non	461.92	461.92	0	5.86	1703	>sp|P02817|AMELX_BOVIN Amelogenin, X isoform OS=Bos taurus OX=9913 GN=AMELX PE=1 SV=2	1	hf1_10472_ebo_30_1_261219.ScanId;v=1;d1=24065.24065.3	controllerType=0 controllerNumber=1 scan=24065	49.8584
29846:3	1	S.M[+15.995]PLPPHPGHPGYINFS[+79.966]YEVLTPLKWYQSM[+31.990].I		M[+16][+32], S[+80]	1176.55	3	3527.64	3527.62	0	5.7	17	Non	631.19	631.19	0	9.31	1703	>sp|P02817|AMELX_BOVIN Amelogenin, X isoform OS=Bos taurus OX=9913 GN=AMELX PE=1 SV=2	1	hf1_10472_ebo_30_1_261219.ScanId;v=1;d1=22593.22593.3	controllerType=0 controllerNumber=1 scan=22593	47.1786
33877:3	1	S.MPLPPHPGHPGYINFS[+79.966]YEVLTPLKWYQ[+0.984]SM[+15.995].I		M[+16], Q[+1], S[+80]	1166.22	3	3496.64	3496.61	0	6.1	17	Non	654.14	654.14	36.2	9.61	1703	>sp|P02817|AMELX_BOVIN Amelogenin, X isoform OS=Bos taurus OX=9913 GN=AMELX PE=1 SV=2	1	hf1_10472_ebo_30_1_261219.ScanId;v=1;d1=25319.25319.3	controllerType=0 controllerNumber=1 scan=25319	52.1357
36071:3	1	S.M[+15.995]PLPPHPGHPGYINFS[+79.966]YEVLTPLKWYQ[+0.984]SM.I		M[+16], Q[+1], S[+80]	1166.22	3	3496.64	3496.61	0	7.3	17	Non	754	726.98	16.94	12.25	1703	>sp|P02817|AMELX_BOVIN Amelogenin, X isoform OS=Bos taurus OX=9913 GN=AMELX PE=1 SV=2	1	hf1_10472_ebo_30_1_261219.ScanId;v=1;d1=26763.26763.3	controllerType=0 controllerNumber=1 scan=26763	54.7933
31244:3	1	S.M[+15.995]PLPPHPGHPGYINFS[+79.966]YEVLTPLKWYQSM[+15.995].I		M[+16]*2, S[+80]	1171.22	3	3511.65	3511.63	0	6.5	17	Non	804.41	804.41	0	13.25	1703	>sp|P02817|AMELX_BOVIN Amelogenin, X isoform OS=Bos taurus OX=9913 GN=AMELX PE=1 SV=2	1	hf1_10472_ebo_30_1_261219.ScanId;v=1;d1=23536.23536.3	controllerType=0 controllerNumber=1 scan=23536	48.9156
31527:3	1	S.M[+15.995]PLPPHPGHPGYINFS[+79.966]YEVLTPLKWYQSM[+15.995].I		M[+16]*2, S[+80]	1171.22	3	3511.65	3511.63	0	5.6	17	Non	879.85	879.85	0	14.31	1703	>sp|P02817|AMELX_BOVIN Amelogenin, X isoform OS=Bos taurus OX=9913 GN=AMELX PE=1 SV=2	1	hf1_10472_ebo_30_1_261219.ScanId;v=1;d1=23732.23732.3	controllerType=0 controllerNumber=1 scan=23732	49.2696
31813:3	1	S.M[+15.995]PLPPHPGHPGYINFS[+79.966]YEVLTPLKWYQSM[+15.995].I		M[+16]*2, S[+80]	1171.22	3	3511.65	3511.63	0	5.7	17	Non	939.19	939.19	0	15.31	1703	>sp|P02817|AMELX_BOVIN Amelogenin, X isoform OS=Bos taurus OX=9913 GN=AMELX PE=1 SV=2	1	hf1_10472_ebo_30_1_261219.ScanId;v=1;d1=23926.23926.3	controllerType=0 controllerNumber=1 scan=23926	49.6154
34435:3	1	S.M[+15.995]PLPPHPGHPGYINF[+31.990]SY[+31.990]EVLTPLKWYQSM[+15.995].I		F[+32], M[+16]*2, Y[+32]	1165.88	3	3495.63	3495.64	0	-3.2	17	Non	182.51	182.51	2.17	2.29	1703	>sp|P02817|AMELX_BOVIN Amelogenin, X isoform OS=Bos taurus OX=9913 GN=AMELX PE=1 SV=2	1	hf1_10472_ebo_30_1_261219.ScanId;v=1;d1=25692.25692.3	controllerType=0 controllerNumber=1 scan=25692	52.8307
33412:4	1	S.MP[+15.995]LPPHPGHPGYINFS[+79.966]YEVLTPLKWYQ[+0.984]SM[+31.990].I		M[+32], P[+16], Q[+1], S[+80]	882.911	4	3528.62	3528.6	0	5.3	17	Non	194.03	194.03	4	2.58	1703	>sp|P02817|AMELX_BOVIN Amelogenin, X isoform OS=Bos taurus OX=9913 GN=AMELX PE=1 SV=2	1	hf1_10472_ebo_30_1_261219.ScanId;v=1;d1=25006.25006.4	controllerType=0 controllerNumber=1 scan=25006	51.56
31959:4	1	S.M[+31.990]PLPPHPGHPGYIN[+0.984]FS[+79.966]YEVLTPLKWYQSM[+15.995].I		M[+16][+32], N[+1], S[+80]	882.911	4	3528.62	3528.6	0	4.8	17	Non	220.3	220.3	6.67	2.81	1703	>sp|P02817|AMELX_BOVIN Amelogenin, X isoform OS=Bos taurus OX=9913 GN=AMELX PE=1 SV=2	1	hf1_10472_ebo_30_1_261219.ScanId;v=1;d1=24019.24019.4	controllerType=0 controllerNumber=1 scan=24019	49.7742
29430:4	1	S.MP[+15.995]LPPHPGHPGYINFS[+79.966]YEVLTPLKWY[+31.990]Q[+0.984]SM.I		P[+16], Q[+1], S[+80], Y[+32]	882.911	4	3528.62	3528.6	0	4.5	17	Non	227.99	227.99	0	2.81	1703	>sp|P02817|AMELX_BOVIN Amelogenin, X isoform OS=Bos taurus OX=9913 GN=AMELX PE=1 SV=2	1	hf1_10472_ebo_30_1_261219.ScanId;v=1;d1=22318.22318.4	controllerType=0 controllerNumber=1 scan=22318	46.6821
29722:4	1	S.MP[+15.995]LPPHPGHPGYIN[+0.984]FS[+79.966]YEVLTPLKW[+31.990]YQSM.I		N[+1], P[+16], S[+80], W[+32]	882.913	4	3528.63	3528.6	0	6.8	17	Non	228.6	228.6	0	3.29	1703	>sp|P02817|AMELX_BOVIN Amelogenin, X isoform OS=Bos taurus OX=9913 GN=AMELX PE=1 SV=2	1	hf1_10472_ebo_30_1_261219.ScanId;v=1;d1=22514.22514.4	controllerType=0 controllerNumber=1 scan=22514	47.0368
33131:3	1	S.M[+31.990]PLPPHPGHPGYINFS[+79.966]YEVLTPLKWYQ[+0.984]SM[+15.995].I		M[+16][+32], Q[+1], S[+80]	1176.88	3	3528.62	3528.6	0	4.7	17	Non	240.4	240.4	0	5.04	1703	>sp|P02817|AMELX_BOVIN Amelogenin, X isoform OS=Bos taurus OX=9913 GN=AMELX PE=1 SV=2	1	hf1_10472_ebo_30_1_261219.ScanId;v=1;d1=24813.24813.3	controllerType=0 controllerNumber=1 scan=24813	51.1989
30676:4	1	S.MP[+15.995]LPPHPGHPGYINFS[+79.966]YEVLTPLKW[+31.990]YQ[+0.984]SM.I		P[+16], Q[+1], S[+80], W[+32]	882.911	4	3528.62	3528.6	0	4.9	17	Non	291	291	0	5.16	1703	>sp|P02817|AMELX_BOVIN Amelogenin, X isoform OS=Bos taurus OX=9913 GN=AMELX PE=1 SV=2	1	hf1_10472_ebo_30_1_261219.ScanId;v=1;d1=23138.23138.4	controllerType=0 controllerNumber=1 scan=23138	48.168
34205:4	1	S.MP[+15.995]LPPHPGHPGYINF[+31.990]SY[+31.990]EVLTPLKWYQSM[+15.995].I		F[+32], M[+16], P[+16], Y[+32]	874.664	4	3495.63	3495.64	0	-1.6	17	Non	303.24	303.24	1.8	4.12	1703	>sp|P02817|AMELX_BOVIN Amelogenin, X isoform OS=Bos taurus OX=9913 GN=AMELX PE=1 SV=2	1	hf1_10472_ebo_30_1_261219.ScanId;v=1;d1=25534.25534.4	controllerType=0 controllerNumber=1 scan=25534	52.5271
32300:3	1	S.MP[+15.995]LPPHPGHPGYIN[+0.984]FS[+79.966]YEVLTPLKWYQSM[+31.990].I		M[+32], N[+1], P[+16], S[+80]	1176.88	3	3528.63	3528.6	0	5.9	17	Non	386.98	386.98	4	6.55	1703	>sp|P02817|AMELX_BOVIN Amelogenin, X isoform OS=Bos taurus OX=9913 GN=AMELX PE=1 SV=2	1	hf1_10472_ebo_30_1_261219.ScanId;v=1;d1=24257.24257.3	controllerType=0 controllerNumber=1 scan=24257	50.2044
30855:3	1	S.MP[+15.995]LPPHPGHPGYINFS[+79.966]YEVLTPLKW[+31.990]YQ[+0.984]SM.I		P[+16], Q[+1], S[+80], W[+32]	1176.88	3	3528.63	3528.6	0	8.4	17	Non	595.9	595.9	0	7.2	1703	>sp|P02817|AMELX_BOVIN Amelogenin, X isoform OS=Bos taurus OX=9913 GN=AMELX PE=1 SV=2	1	hf1_10472_ebo_30_1_261219.ScanId;v=1;d1=23262.23262.3	controllerType=0 controllerNumber=1 scan=23262	48.3918
30564:3	1	S.M[+15.995]PLPPHPGHPGYINFS[+79.966]YEVLTPLKW[+31.990]YQ[+0.984]SM.I		M[+16], Q[+1], S[+80], W[+32]	1176.88	3	3528.62	3528.6	0	4.8	17	Non	672.32	672.32	0	9.61	1703	>sp|P02817|AMELX_BOVIN Amelogenin, X isoform OS=Bos taurus OX=9913 GN=AMELX PE=1 SV=2	1	hf1_10472_ebo_30_1_261219.ScanId;v=1;d1=23064.23064.3	controllerType=0 controllerNumber=1 scan=23064	48.0364
33148:5	1	S.M[+15.995]PLPPHPGHPGYINFSYEVLTPLKWYQSMIR.H		M[+16]	737.771	5	3684.82	3684.85	0	-6.9	17	NRagged	228.91	228.91	0.08	2.62	1703	>sp|P02817|AMELX_BOVIN Amelogenin, X isoform OS=Bos taurus OX=9913 GN=AMELX PE=1 SV=2	1	hf1_10472_ebo_30_1_261219.ScanId;v=1;d1=24826.24826.5	controllerType=0 controllerNumber=1 scan=24826	51.2213
34602:4	1	S.MPLPPHPGHPGYINFS[+79.966]YEVLTPLKWYQSM[+15.995]IR.H		M[+16], S[+80]	941.958	4	3764.81	3764.82	0	-1.6	17	NRagged	308.44	308.44	19.51	5.1	1703	>sp|P02817|AMELX_BOVIN Amelogenin, X isoform OS=Bos taurus OX=9913 GN=AMELX PE=1 SV=2	1	hf1_10472_ebo_30_1_261219.ScanId;v=1;d1=25799.25799.4	controllerType=0 controllerNumber=1 scan=25799	53.0307
35471:4	1	S.M[+15.995]PLPPHPGHPGYINFS[+79.966]YEVLTPLKWYQSMIR.H		M[+16], S[+80]	941.962	4	3764.83	3764.82	0	3.2	17	NRagged	418.43	418.43	24.41	6.52	1703	>sp|P02817|AMELX_BOVIN Amelogenin, X isoform OS=Bos taurus OX=9913 GN=AMELX PE=1 SV=2	1	hf1_10472_ebo_30_1_261219.ScanId;v=1;d1=26368.26368.4	controllerType=0 controllerNumber=1 scan=26368	54.0791
35038:5	1	S.MP[+15.995]LPPHPGHPGYINFS[+79.966]YEVLTPLKWYQSMIR.H		P[+16], S[+80]	753.772	5	3764.83	3764.82	0	3.6	17	NRagged	483.37	483.37	4	7.07	1703	>sp|P02817|AMELX_BOVIN Amelogenin, X isoform OS=Bos taurus OX=9913 GN=AMELX PE=1 SV=2	1	hf1_10472_ebo_30_1_261219.ScanId;v=1;d1=26083.26083.5	controllerType=0 controllerNumber=1 scan=26083	53.5548
32196:5	1	S.MPLPPHPGHPGYINFS[+79.966]YEVLTPLKWYQSM[+15.995]IR.H		M[+16], S[+80]	753.774	5	3764.84	3764.82	0	6.3	17	NRagged	547.53	547.53	31.78	7.73	1703	>sp|P02817|AMELX_BOVIN Amelogenin, X isoform OS=Bos taurus OX=9913 GN=AMELX PE=1 SV=2	1	hf1_10472_ebo_30_1_261219.ScanId;v=1;d1=24185.24185.5	controllerType=0 controllerNumber=1 scan=24185	50.0719
31923:5	1	S.MPLPPHPGHPGYINFS[+79.966]YEVLTPLKWYQSM[+15.995]IR.H		M[+16], S[+80]	753.773	5	3764.84	3764.82	0	5.2	17	NRagged	551	551	46.5	7.8	1703	>sp|P02817|AMELX_BOVIN Amelogenin, X isoform OS=Bos taurus OX=9913 GN=AMELX PE=1 SV=2	1	hf1_10472_ebo_30_1_261219.ScanId;v=1;d1=23995.23995.5	controllerType=0 controllerNumber=1 scan=23995	49.7312
33184:4	1	S.MPLPPHPGHPGYINFS[+79.966]YEVLTPLKWYQSM[+15.995]IR.H		M[+16], S[+80]	941.963	4	3764.83	3764.82	0	4.2	17	NRagged	687.87	687.87	39.57	10.85	1703	>sp|P02817|AMELX_BOVIN Amelogenin, X isoform OS=Bos taurus OX=9913 GN=AMELX PE=1 SV=2	1	hf1_10472_ebo_30_1_261219.ScanId;v=1;d1=24850.24850.4	controllerType=0 controllerNumber=1 scan=24850	51.2659
33443:4	1	S.MPLPPHPGHPGYINFS[+79.966]YEVLTPLKWYQSM[+15.995]IR.H		M[+16], S[+80]	941.961	4	3764.82	3764.82	0	1.4	17	NRagged	765.19	765.19	39.22	12.15	1703	>sp|P02817|AMELX_BOVIN Amelogenin, X isoform OS=Bos taurus OX=9913 GN=AMELX PE=1 SV=2	1	hf1_10472_ebo_30_1_261219.ScanId;v=1;d1=25030.25030.4	controllerType=0 controllerNumber=1 scan=25030	51.6073
29216:5	1	S.MP[+15.995]LPPHPGHPGYINFSYEVLTPLKWYQSM[+15.995]IR.H		M[+16], P[+16]	740.981	5	3700.87	3700.84	0	7.8	17	NRagged	827.51	827.51	0	13.51	1703	>sp|P02817|AMELX_BOVIN Amelogenin, X isoform OS=Bos taurus OX=9913 GN=AMELX PE=1 SV=2	1	hf1_10472_ebo_30_1_261219.ScanId;v=1;d1=22178.22178.5	controllerType=0 controllerNumber=1 scan=22178	46.4224
32141:4	1	S.MPLPPHPGHPGYINFS[+79.966]YEVLTPLKWYQSM[+15.995]IR.H		M[+16], S[+80]	941.965	4	3764.84	3764.82	0	6	17	NRagged	1098.18	1098.18	58.88	18.85	1703	>sp|P02817|AMELX_BOVIN Amelogenin, X isoform OS=Bos taurus OX=9913 GN=AMELX PE=1 SV=2	1	hf1_10472_ebo_30_1_261219.ScanId;v=1;d1=24145.24145.4	controllerType=0 controllerNumber=1 scan=24145	49.9977
35174:4	1	S.M[+15.995]PLPPHPGHPGYINFS[+79.966]YEVLTPLKWYQSMIR.H		M[+16], S[+80]	941.964	4	3764.83	3764.82	0	5.1	17	NRagged	1136.01	1136.01	28.04	19.85	1703	>sp|P02817|AMELX_BOVIN Amelogenin, X isoform OS=Bos taurus OX=9913 GN=AMELX PE=1 SV=2	1	hf1_10472_ebo_30_1_261219.ScanId;v=1;d1=26175.26175.4	controllerType=0 controllerNumber=1 scan=26175	53.7218
32464:4	1	S.M[+15.995]PLPPHPGHPGYINFS[+79.966]YEVLTPLKWYQSM[+31.990]IR.H		M[+16][+32], S[+80]	949.959	4	3796.81	3796.81	0	1.8	17	NRagged	149.8	149.8	1.57	2.28	1703	>sp|P02817|AMELX_BOVIN Amelogenin, X isoform OS=Bos taurus OX=9913 GN=AMELX PE=1 SV=2	1	hf1_10472_ebo_30_1_261219.ScanId;v=1;d1=24367.24367.4	controllerType=0 controllerNumber=1 scan=24367	50.397
31869:5	1	S.MP[+15.995]LPPHPGHPGYINFS[+79.966]YEVLTPLKWYQSM[+31.990]IR.H		M[+32], P[+16], S[+80]	760.167	5	3796.8	3796.81	0	-0.2	17	NRagged	223.66	223.66	4	3.05	1703	>sp|P02817|AMELX_BOVIN Amelogenin, X isoform OS=Bos taurus OX=9913 GN=AMELX PE=1 SV=2	1	hf1_10472_ebo_30_1_261219.ScanId;v=1;d1=23962.23962.5	controllerType=0 controllerNumber=1 scan=23962	49.6738
36364:4	1	S.MPLPPHPGHP[+15.995]GYINF[+31.990]SY[+31.990]EVLTPLKWYQSMIR.H		F[+32], P[+16], Y[+32]	937.97	4	3748.86	3748.83	0	8	17	NRagged	251.65	251.65	9.96	5.52	1703	>sp|P02817|AMELX_BOVIN Amelogenin, X isoform OS=Bos taurus OX=9913 GN=AMELX PE=1 SV=2	1	hf1_10472_ebo_30_1_261219.ScanId;v=1;d1=26946.26946.4	controllerType=0 controllerNumber=1 scan=26946	55.1191
30026:4	1	S.MP[+15.995]LPPHPGHPGYINFS[+79.966]YEVLTPLKWYQSM[+15.995]IR.H		M[+16], P[+16], S[+80]	945.963	4	3780.83	3780.81	0	5.1	17	NRagged	257.8	257.8	10.19	5.58	1703	>sp|P02817|AMELX_BOVIN Amelogenin, X isoform OS=Bos taurus OX=9913 GN=AMELX PE=1 SV=2	1	hf1_10472_ebo_30_1_261219.ScanId;v=1;d1=22714.22714.4	controllerType=0 controllerNumber=1 scan=22714	47.4011
31282:4	1	S.M[+31.990]PLPPHPGHPGYINFS[+79.966]YEVLTPLKWYQSM[+15.995]IR.H		M[+16][+32], S[+80]	949.96	4	3796.82	3796.81	0	3.2	17	NRagged	309.99	309.99	0	5.19	1703	>sp|P02817|AMELX_BOVIN Amelogenin, X isoform OS=Bos taurus OX=9913 GN=AMELX PE=1 SV=2	1	hf1_10472_ebo_30_1_261219.ScanId;v=1;d1=23563.23563.4	controllerType=0 controllerNumber=1 scan=23563	48.9674
36571:5	1	S.MP[+15.995]LPPHPGHPGYIN[+0.984]FS[+79.966]YEVLTPLKWYQSMIR.H		N[+1], P[+16], S[+80]	753.966	5	3765.8	3765.8	0	0.3	17	NRagged	317.66	317.66	4	5.15	1703	>sp|P02817|AMELX_BOVIN Amelogenin, X isoform OS=Bos taurus OX=9913 GN=AMELX PE=1 SV=2	1	hf1_10472_ebo_30_1_261219.ScanId;v=1;d1=27072.27072.5	controllerType=0 controllerNumber=1 scan=27072	55.3434
33294:5	1	S.MPLPPHPGHPGYIN[+0.984]FS[+79.966]YEVLTPLKWYQSM[+15.995]IR.H		M[+16], N[+1], S[+80]	753.971	5	3765.83	3765.8	0	7.4	17	NRagged	383.42	383.42	34.42	6.78	1703	>sp|P02817|AMELX_BOVIN Amelogenin, X isoform OS=Bos taurus OX=9913 GN=AMELX PE=1 SV=2	1	hf1_10472_ebo_30_1_261219.ScanId;v=1;d1=24925.24925.5	controllerType=0 controllerNumber=1 scan=24925	51.4007
30860:6	1	S.M[+15.995]PLPPHPGHPGYINFS[+79.966]YEVLTPLKWYQSM[+15.995]IR.H		M[+16]*2, S[+80]	630.978	6	3780.83	3780.81	0	5.1	17	NRagged	401.2	401.2	0	6.32	1703	>sp|P02817|AMELX_BOVIN Amelogenin, X isoform OS=Bos taurus OX=9913 GN=AMELX PE=1 SV=2	1	hf1_10472_ebo_30_1_261219.ScanId;v=1;d1=23265.23265.6	controllerType=0 controllerNumber=1 scan=23265	48.3963
34874:4	1	S.MPLPPHPGHPGYINFS[+79.966]YEVLTPLKWYQ[+0.984]SM[+15.995]IR.H		M[+16], Q[+1], S[+80]	942.207	4	3765.8	3765.8	0	1.2	17	NRagged	410.02	410.02	31.51	6.43	1703	>sp|P02817|AMELX_BOVIN Amelogenin, X isoform OS=Bos taurus OX=9913 GN=AMELX PE=1 SV=2	1	hf1_10472_ebo_30_1_261219.ScanId;v=1;d1=25981.25981.4	controllerType=0 controllerNumber=1 scan=25981	53.3719
31031:4	1	S.M[+15.995]PLPPHPGHPGYINFS[+79.966]YEVLTPLKWY[+31.990]QSMIR.H		M[+16], S[+80], Y[+32]	949.96	4	3796.82	3796.81	0	3.5	17	NRagged	419.63	419.63	0	6.52	1703	>sp|P02817|AMELX_BOVIN Amelogenin, X isoform OS=Bos taurus OX=9913 GN=AMELX PE=1 SV=2	1	hf1_10472_ebo_30_1_261219.ScanId;v=1;d1=23381.23381.4	controllerType=0 controllerNumber=1 scan=23381	48.6192
33487:4	1	S.MP[+15.995]LPPHPGHPGYINFS[+79.966]YEVLTPLKWYQSM[+15.995]IR.H		M[+16], P[+16], S[+80]	945.955	4	3780.8	3780.81	0	-2.9	17	NRagged	470.32	470.32	1.8	6.2	1703	>sp|P02817|AMELX_BOVIN Amelogenin, X isoform OS=Bos taurus OX=9913 GN=AMELX PE=1 SV=2	1	hf1_10472_ebo_30_1_261219.ScanId;v=1;d1=25059.25059.4	controllerType=0 controllerNumber=1 scan=25059	51.6579
29079:5	1	S.MP[+15.995]LPPHPGHPGYINFS[+79.966]YEVLTPLKW[+31.990]YQSMIR.H		P[+16], S[+80], W[+32]	760.17	5	3796.82	3796.81	0	3.7	17	NRagged	482.28	482.28	4	6.47	1703	>sp|P02817|AMELX_BOVIN Amelogenin, X isoform OS=Bos taurus OX=9913 GN=AMELX PE=1 SV=2	1	hf1_10472_ebo_30_1_261219.ScanId;v=1;d1=22093.22093.5	controllerType=0 controllerNumber=1 scan=22093	46.2621
36429:4	1	S.M[+15.995]PLPPHPGHPGYIN[+0.984]FS[+79.966]YEVLTPLKWYQSMIR.H		M[+16], N[+1], S[+80]	942.212	4	3765.83	3765.8	0	7.1	17	NRagged	487.76	429.46	31.23	7.29	1703	>sp|P02817|AMELX_BOVIN Amelogenin, X isoform OS=Bos taurus OX=9913 GN=AMELX PE=1 SV=2	1	hf1_10472_ebo_30_1_261219.ScanId;v=1;d1=26986.26986.4	controllerType=0 controllerNumber=1 scan=26986	55.1911
30726:5	1	S.MP[+15.995]LPPHPGHPGYINFS[+79.966]YEVLTPLKWYQSM[+15.995]IR.H		M[+16], P[+16], S[+80]	756.971	5	3780.83	3780.81	0	4.5	17	NRagged	509.67	509.67	9.63	6.98	1703	>sp|P02817|AMELX_BOVIN Amelogenin, X isoform OS=Bos taurus OX=9913 GN=AMELX PE=1 SV=2	1	hf1_10472_ebo_30_1_261219.ScanId;v=1;d1=23173.23173.5	controllerType=0 controllerNumber=1 scan=23173	48.232
33559:5	1	S.MPLPPHPGHPGYINFS[+79.966]YEVLTPLKWYQ[+0.984]SM[+15.995]IR.H		M[+16], Q[+1], S[+80]	753.971	5	3765.83	3765.8	0	7	17	NRagged	517.82	517.82	34.7	7.62	1703	>sp|P02817|AMELX_BOVIN Amelogenin, X isoform OS=Bos taurus OX=9913 GN=AMELX PE=1 SV=2	1	hf1_10472_ebo_30_1_261219.ScanId;v=1;d1=25109.25109.5	controllerType=0 controllerNumber=1 scan=25109	51.7514
31249:5	1	S.M[+15.995]PLPPHPGHPGYINFS[+79.966]YEVLTPLKWYQSM[+15.995]IR.H		M[+16]*2, S[+80]	756.97	5	3780.82	3780.81	0	2.5	17	NRagged	524.06	524.06	0	7.18	1703	>sp|P02817|AMELX_BOVIN Amelogenin, X isoform OS=Bos taurus OX=9913 GN=AMELX PE=1 SV=2	1	hf1_10472_ebo_30_1_261219.ScanId;v=1;d1=23539.23539.5	controllerType=0 controllerNumber=1 scan=23539	48.9201
34603:4	1	S.MPLPPHPGHPGYINFS[+79.966]YEVLTPLKWYQ[+0.984]SM[+15.995]IR.H		M[+16], Q[+1], S[+80]	942.207	4	3765.81	3765.8	0	2.2	17	NRagged	565.59	565.59	42.31	7.53	1703	>sp|P02817|AMELX_BOVIN Amelogenin, X isoform OS=Bos taurus OX=9913 GN=AMELX PE=1 SV=2	1	hf1_10472_ebo_30_1_261219.ScanId;v=1;d1=25799.25799.4	controllerType=0 controllerNumber=1 scan=25799	53.0307
30755:4	1	S.M[+31.990]PLPPHPGHPGYINFS[+79.966]YEVLTPLKWYQSM[+15.995]IR.H		M[+16][+32], S[+80]	949.962	4	3796.82	3796.81	0	4.9	17	NRagged	570.56	570.56	0	8.25	1703	>sp|P02817|AMELX_BOVIN Amelogenin, X isoform OS=Bos taurus OX=9913 GN=AMELX PE=1 SV=2	1	hf1_10472_ebo_30_1_261219.ScanId;v=1;d1=23193.23193.4	controllerType=0 controllerNumber=1 scan=23193	48.2678
30467:4	1	S.M[+15.995]PLPPHPGHPGYINFS[+79.966]YEVLTP[+31.990]LKWYQSMIR.H		M[+16], P[+32], S[+80]	949.957	4	3796.81	3796.81	0	0.3	17	NRagged	586.01	586.01	0	7.54	1703	>sp|P02817|AMELX_BOVIN Amelogenin, X isoform OS=Bos taurus OX=9913 GN=AMELX PE=1 SV=2	1	hf1_10472_ebo_30_1_261219.ScanId;v=1;d1=23001.23001.5	controllerType=0 controllerNumber=1 scan=23001	47.9244
31885:4	1	S.M[+15.995]PLPPHPGHPGYINFS[+79.966]YEVLTPLKWYQSM[+31.990]IR.H		M[+16][+32], S[+80]	949.957	4	3796.81	3796.81	0	0.2	17	NRagged	632.42	632.42	14.99	8.44	1703	>sp|P02817|AMELX_BOVIN Amelogenin, X isoform OS=Bos taurus OX=9913 GN=AMELX PE=1 SV=2	1	hf1_10472_ebo_30_1_261219.ScanId;v=1;d1=23975.23975.4	controllerType=0 controllerNumber=1 scan=23975	49.6989
36879:5	1	S.MP[+15.995]LPPHPGHPGYINFS[+79.966]YEVLTPLKWYQ[+0.984]SMIR.H		P[+16], Q[+1], S[+80]	753.97	5	3765.82	3765.8	0	5.8	17	NRagged	651.43	651.43	4	10.57	1703	>sp|P02817|AMELX_BOVIN Amelogenin, X isoform OS=Bos taurus OX=9913 GN=AMELX PE=1 SV=2	1	hf1_10472_ebo_30_1_261219.ScanId;v=1;d1=27270.27270.5	controllerType=0 controllerNumber=1 scan=27270	55.7056
36740:4	1	S.M[+15.995]PLPPHPGHPGYIN[+0.984]FS[+79.966]YEVLTPLKWYQSMIR.H		M[+16], N[+1], S[+80]	942.211	4	3765.82	3765.8	0	6	17	NRagged	671.23	671.23	11.83	10.85	1703	>sp|P02817|AMELX_BOVIN Amelogenin, X isoform OS=Bos taurus OX=9913 GN=AMELX PE=1 SV=2	1	hf1_10472_ebo_30_1_261219.ScanId;v=1;d1=27182.27182.4	controllerType=0 controllerNumber=1 scan=27182	55.5468
31773:4	1	S.MP[+15.995]LPPHPGHPGYINFS[+79.966]YEVLTPLKWYQSM[+15.995]IR.H		M[+16], P[+16], S[+80]	945.963	4	3780.83	3780.81	0	5.7	17	NRagged	672.44	672.44	13.67	10.25	1703	>sp|P02817|AMELX_BOVIN Amelogenin, X isoform OS=Bos taurus OX=9913 GN=AMELX PE=1 SV=2	1	hf1_10472_ebo_30_1_261219.ScanId;v=1;d1=23900.23900.4	controllerType=0 controllerNumber=1 scan=23900	49.5688
28497:4	1	S.M[+15.995]PLPPHPGHPGYINFS[+79.966]YEVLTPLKWYQSM[+31.990]IR.H		M[+16][+32], S[+80]	949.962	4	3796.83	3796.81	0	5.3	17	NRagged	694.59	694.59	0	10.85	1703	>sp|P02817|AMELX_BOVIN Amelogenin, X isoform OS=Bos taurus OX=9913 GN=AMELX PE=1 SV=2	1	hf1_10472_ebo_30_1_261219.ScanId;v=1;d1=21724.21724.4	controllerType=0 controllerNumber=1 scan=21724	45.594
33185:4	1	S.MPLPPHPGHPGYIN[+0.984]FS[+79.966]YEVLTPLKWYQSM[+15.995]IR.H		M[+16], N[+1], S[+80]	942.212	4	3765.83	3765.8	0	7.2	17	NRagged	710.51	710.51	35.95	11.78	1703	>sp|P02817|AMELX_BOVIN Amelogenin, X isoform OS=Bos taurus OX=9913 GN=AMELX PE=1 SV=2	1	hf1_10472_ebo_30_1_261219.ScanId;v=1;d1=24850.24850.4	controllerType=0 controllerNumber=1 scan=24850	51.2659
50201:4	1	S.M[+15.995]PLPPHPGHPGYINFS[+79.966]YEVLTPLKWYQSM[+15.995]IR.H		M[+16]*2, S[+80]	945.963	4	3780.83	3780.81	0	5.5	17	NRagged	724.18	724.18	0	11.85	1703	>sp|P02817|AMELX_BOVIN Amelogenin, X isoform OS=Bos taurus OX=9913 GN=AMELX PE=1 SV=2	1	hf1_10472_ebo_30_1_261219.ScanId;v=1;d1=36439.36439.4	controllerType=0 controllerNumber=1 scan=36439	73.5735
31003:5	1	S.M[+15.995]PLPPHPGHPGYINFS[+79.966]YEVLTPLKWYQSM[+15.995]IR.H		M[+16]*2, S[+80]	756.971	5	3780.83	3780.81	0	4.5	17	NRagged	726.83	726.83	0	11.57	1703	>sp|P02817|AMELX_BOVIN Amelogenin, X isoform OS=Bos taurus OX=9913 GN=AMELX PE=1 SV=2	1	hf1_10472_ebo_30_1_261219.ScanId;v=1;d1=23359.23359.5	controllerType=0 controllerNumber=1 scan=23359	48.5747
29055:4	1	S.M[+15.995]PLPPHPGHPGYINFS[+79.966]YEVLTPLKW[+31.990]YQSMIR.H		M[+16], S[+80], W[+32]	949.963	4	3796.83	3796.81	0	6.9	17	NRagged	791.4	791.4	0	12.78	1703	>sp|P02817|AMELX_BOVIN Amelogenin, X isoform OS=Bos taurus OX=9913 GN=AMELX PE=1 SV=2	1	hf1_10472_ebo_30_1_261219.ScanId;v=1;d1=22080.22080.4	controllerType=0 controllerNumber=1 scan=22080	46.2396
29349:4	1	S.M[+15.995]PLPPHPGHPGYINFS[+79.966]YEVLTPLKWY[+31.990]QSMIR.H		M[+16], S[+80], Y[+32]	949.961	4	3796.82	3796.81	0	3.9	17	NRagged	801	801	12.76	13.23	1703	>sp|P02817|AMELX_BOVIN Amelogenin, X isoform OS=Bos taurus OX=9913 GN=AMELX PE=1 SV=2	1	hf1_10472_ebo_30_1_261219.ScanId;v=1;d1=22266.22266.4	controllerType=0 controllerNumber=1 scan=22266	46.5866
37047:4	1	S.M[+15.995]PLPPHPGHPGYINFS[+79.966]YEVLTPLKWYQ[+0.984]SMIR.H		M[+16], Q[+1], S[+80]	942.212	4	3765.83	3765.8	0	6.8	17	NRagged	869.26	869.26	49.14	14.78	1703	>sp|P02817|AMELX_BOVIN Amelogenin, X isoform OS=Bos taurus OX=9913 GN=AMELX PE=1 SV=2	1	hf1_10472_ebo_30_1_261219.ScanId;v=1;d1=27374.27374.4	controllerType=0 controllerNumber=1 scan=27374	55.8916
31489:4	1	S.MP[+15.995]LPPHPGHPGYINFS[+79.966]YEVLTPLKWYQSM[+15.995]IR.H		M[+16], P[+16], S[+80]	945.96	4	3780.82	3780.81	0	2.4	17	NRagged	914.13	914.13	12.64	15.23	1703	>sp|P02817|AMELX_BOVIN Amelogenin, X isoform OS=Bos taurus OX=9913 GN=AMELX PE=1 SV=2	1	hf1_10472_ebo_30_1_261219.ScanId;v=1;d1=23707.23707.4	controllerType=0 controllerNumber=1 scan=23707	49.2248
30694:4	1	S.MP[+15.995]LPPHPGHPGYINFS[+79.966]YEVLTPLKWYQSM[+15.995]IR.H		M[+16], P[+16], S[+80]	945.964	4	3780.84	3780.81	0	6.6	17	NRagged	977.22	977.22	11.71	16.78	1703	>sp|P02817|AMELX_BOVIN Amelogenin, X isoform OS=Bos taurus OX=9913 GN=AMELX PE=1 SV=2	1	hf1_10472_ebo_30_1_261219.ScanId;v=1;d1=23151.23151.4	controllerType=0 controllerNumber=1 scan=23151	48.1933
33714:4	1	S.MPLPPHPGHPGYINFS[+79.966]YEVLTPLKWYQ[+0.984]SM[+15.995]IR.H		M[+16], Q[+1], S[+80]	942.212	4	3765.82	3765.8	0	6.6	17	NRagged	1012.81	1012.81	51.79	17.78	1703	>sp|P02817|AMELX_BOVIN Amelogenin, X isoform OS=Bos taurus OX=9913 GN=AMELX PE=1 SV=2	1	hf1_10472_ebo_30_1_261219.ScanId;v=1;d1=25213.25213.4	controllerType=0 controllerNumber=1 scan=25213	51.9477
30778:3	1	S.M[+15.995]PLPPHPGHPGYINFS[+79.966]YEVLTPLKWYQSM[+15.995]IR.H		M[+16]*2, S[+80]	1260.95	3	3780.85	3780.81	0	9.7	17	NRagged	1107.96	1107.96	0	18.91	1703	>sp|P02817|AMELX_BOVIN Amelogenin, X isoform OS=Bos taurus OX=9913 GN=AMELX PE=1 SV=2	1	hf1_10472_ebo_30_1_261219.ScanId;v=1;d1=23208.23208.3	controllerType=0 controllerNumber=1 scan=23208	48.2933
31218:4	1	S.M[+15.995]PLPPHPGHPGYINFS[+79.966]YEVLTPLKWYQSM[+15.995]IR.H		M[+16]*2, S[+80]	945.963	4	3780.83	3780.81	0	5.1	17	NRagged	1143.25	1143.25	0	19.85	1703	>sp|P02817|AMELX_BOVIN Amelogenin, X isoform OS=Bos taurus OX=9913 GN=AMELX PE=1 SV=2	1	hf1_10472_ebo_30_1_261219.ScanId;v=1;d1=23516.23516.4	controllerType=0 controllerNumber=1 scan=23516	48.8769
30971:4	1	S.M[+15.995]PLPPHPGHPGYINFS[+79.966]YEVLTPLKWYQSM[+15.995]IR.H		M[+16]*2, S[+80]	945.963	4	3780.83	3780.81	0	4.8	17	NRagged	1211	1211	10.15	21.85	1703	>sp|P02817|AMELX_BOVIN Amelogenin, X isoform OS=Bos taurus OX=9913 GN=AMELX PE=1 SV=2	1	hf1_10472_ebo_30_1_261219.ScanId;v=1;d1=23339.23339.4	controllerType=0 controllerNumber=1 scan=23339	48.539
32465:4	1	S.M[+15.995]PLPPHPGHPGYINFS[+79.966]YEVLTPLKWYQ[+0.984]SM[+31.990]IR.H		M[+16][+32], Q[+1], S[+80]	950.207	4	3797.81	3797.79	0	4.3	17	NRagged	176.62	176.62	0	3.21	1703	>sp|P02817|AMELX_BOVIN Amelogenin, X isoform OS=Bos taurus OX=9913 GN=AMELX PE=1 SV=2	1	hf1_10472_ebo_30_1_261219.ScanId;v=1;d1=24367.24367.4	controllerType=0 controllerNumber=1 scan=24367	50.397
29381:4	1	S.MP[+15.995]LPPHPGHPGYINFS[+79.966]YEVLTPLKW[+31.990]Y[+15.995]QSMIR.H		P[+16], S[+80], W[+32], Y[+16]	953.958	4	3812.81	3812.8	0	2.9	17	NRagged	208.85	208.85	4	3.54	1703	>sp|P02817|AMELX_BOVIN Amelogenin, X isoform OS=Bos taurus OX=9913 GN=AMELX PE=1 SV=2	1	hf1_10472_ebo_30_1_261219.ScanId;v=1;d1=22284.22284.4	controllerType=0 controllerNumber=1 scan=22284	46.6166
34012:4	1	S.M[+15.995]PLPPHPGHPGYINF[+31.990]SY[+31.990]EVLTPLKWYQSM[+15.995]IR.H		F[+32], M[+16]*2, Y[+32]	941.957	4	3764.8	3764.82	0	-5	17	NRagged	287.92	287.92	5.8	4.73	1703	>sp|P02817|AMELX_BOVIN Amelogenin, X isoform OS=Bos taurus OX=9913 GN=AMELX PE=1 SV=2	1	hf1_10472_ebo_30_1_261219.ScanId;v=1;d1=25410.25410.4	controllerType=0 controllerNumber=1 scan=25410	52.3026
32178:4	1	S.M[+15.995]PLPPHPGHPGYIN[+0.984]FS[+79.966]YEVLTPLKWYQSM[+31.990]IR.H		M[+16][+32], N[+1], S[+80]	950.208	4	3797.81	3797.79	0	5.1	17	NRagged	342.46	342.46	12.64	6.13	1703	>sp|P02817|AMELX_BOVIN Amelogenin, X isoform OS=Bos taurus OX=9913 GN=AMELX PE=1 SV=2	1	hf1_10472_ebo_30_1_261219.ScanId;v=1;d1=24173.24173.4	controllerType=0 controllerNumber=1 scan=24173	50.0485
31597:4	1	S.M[+31.990]PLPPHPGHPGYIN[+0.984]FS[+79.966]YEVLTPLKWYQSM[+15.995]IR.H		M[+16][+32], N[+1], S[+80]	950.207	4	3797.81	3797.79	0	4.8	17	NRagged	348.51	348.51	0	5.96	1703	>sp|P02817|AMELX_BOVIN Amelogenin, X isoform OS=Bos taurus OX=9913 GN=AMELX PE=1 SV=2	1	hf1_10472_ebo_30_1_261219.ScanId;v=1;d1=23780.23780.4	controllerType=0 controllerNumber=1 scan=23780	49.3555
30174:5	1	S.MP[+15.995]LPPHPGHPGYINFS[+79.966]YEVLTPLKWY[+31.990]Q[+0.984]SMIR.H		P[+16], Q[+1], S[+80], Y[+32]	760.367	5	3797.81	3797.79	0	4.4	17	NRagged	368.53	368.53	0	6.81	1703	>sp|P02817|AMELX_BOVIN Amelogenin, X isoform OS=Bos taurus OX=9913 GN=AMELX PE=1 SV=2	1	hf1_10472_ebo_30_1_261219.ScanId;v=1;d1=22808.22808.5	controllerType=0 controllerNumber=1 scan=22808	47.5706
29891:4	1	S.M[+15.995]PLPPHPGHPGYIN[+0.984]FS[+79.966]YEVLTPLKWYQSM[+31.990]IR.H		M[+16][+32], N[+1], S[+80]	950.205	4	3797.8	3797.79	0	2.7	17	NRagged	416.6	416.6	10.83	6.66	1703	>sp|P02817|AMELX_BOVIN Amelogenin, X isoform OS=Bos taurus OX=9913 GN=AMELX PE=1 SV=2	1	hf1_10472_ebo_30_1_261219.ScanId;v=1;d1=22622.22622.4	controllerType=0 controllerNumber=1 scan=22622	47.2309
33580:4	1	S.M[+15.995]PLPPHPGHPGYINFS[+79.966]YEVLTPLKWYQ[+0.984]SM[+31.990]IR.H		M[+16][+32], Q[+1], S[+80]	950.208	4	3797.81	3797.79	0	5.5	17	NRagged	428.41	428.41	16.91	7.13	1703	>sp|P02817|AMELX_BOVIN Amelogenin, X isoform OS=Bos taurus OX=9913 GN=AMELX PE=1 SV=2	1	hf1_10472_ebo_30_1_261219.ScanId;v=1;d1=25123.25123.4	controllerType=0 controllerNumber=1 scan=25123	51.7748
30178:4	1	S.M[+15.995]PLPPHPGHPGYINFS[+79.966]YEVLTPLKWY[+31.990]Q[+0.984]SMIR.H		M[+16], Q[+1], S[+80], Y[+32]	950.207	4	3797.81	3797.79	0	4.4	17	NRagged	789.87	789.87	0	12.85	1703	>sp|P02817|AMELX_BOVIN Amelogenin, X isoform OS=Bos taurus OX=9913 GN=AMELX PE=1 SV=2	1	hf1_10472_ebo_30_1_261219.ScanId;v=1;d1=22811.22811.4	controllerType=0 controllerNumber=1 scan=22811	47.5779
28199:6	1	S.MP[+15.995]LPPHPGHPGYINFSYEVLTPLKWYQSM[+15.995]IRH.P		M[+16], P[+16]	640.494	6	3837.93	3837.9	0	6.5	17	Non	101.05	101.05	0	2.26	1703	>sp|P02817|AMELX_BOVIN Amelogenin, X isoform OS=Bos taurus OX=9913 GN=AMELX PE=1 SV=2	1	hf1_10472_ebo_30_1_261219.ScanId;v=1;d1=21533.21533.3	controllerType=0 controllerNumber=1 scan=21533	45.2581
28164:6	1	S.MP[+15.995]LPPHPGHPGYINFSYEVLTPLKWYQSM[+15.995]IRH.P		M[+16], P[+16]	640.494	6	3837.93	3837.9	0	6.5	17	Non	358.22	358.22	0	5.71	1703	>sp|P02817|AMELX_BOVIN Amelogenin, X isoform OS=Bos taurus OX=9913 GN=AMELX PE=1 SV=2	1	hf1_10472_ebo_30_1_261219.ScanId;v=1;d1=21509.21509.6	controllerType=0 controllerNumber=1 scan=21509	45.2181
29196:6	1	S.M[+15.995]PLPPHPGHPGYINFS[+79.966]YEVLTPLKWYQSM[+15.995]IRH.P		M[+16]*2, S[+80]	653.822	6	3917.89	3917.87	0	6.4	17	Non	419.8	419.8	11.42	6.74	1703	>sp|P02817|AMELX_BOVIN Amelogenin, X isoform OS=Bos taurus OX=9913 GN=AMELX PE=1 SV=2	1	hf1_10472_ebo_30_1_261219.ScanId;v=1;d1=22165.22165.6	controllerType=0 controllerNumber=1 scan=22165	46.3999
29309:5	1	S.M[+15.995]PLPPHPGHPGYINFS[+79.966]YEVLTPLKWYQSM[+15.995]IRH.P		M[+16]*2, S[+80]	784.384	5	3917.89	3917.87	0	5	17	Non	564.19	564.19	9.63	8.76	1703	>sp|P02817|AMELX_BOVIN Amelogenin, X isoform OS=Bos taurus OX=9913 GN=AMELX PE=1 SV=2	1	hf1_10472_ebo_30_1_261219.ScanId;v=1;d1=22239.22239.5	controllerType=0 controllerNumber=1 scan=22239	46.5373
29214:4	1	S.MP[+15.995]LPPHPGHPGYINFS[+79.966]YEVLTPLKWYQSM[+15.995]IRH.P		M[+16], P[+16], S[+80]	980.227	4	3917.89	3917.87	0	4.7	17	Non	688.03	688.03	0	10.23	1703	>sp|P02817|AMELX_BOVIN Amelogenin, X isoform OS=Bos taurus OX=9913 GN=AMELX PE=1 SV=2	1	hf1_10472_ebo_30_1_261219.ScanId;v=1;d1=22177.22177.4	controllerType=0 controllerNumber=1 scan=22177	46.4209
29858:5	1	S.MP[+15.995]LPPHPGHPGYINFS[+79.966]YEVLTPLKWY[+15.995]QSMIRHP.Y		P[+16], S[+80], Y[+16]	803.793	5	4014.94	4014.92	0	3.6	17	Non	146.05	134.28	4	2.42	1703	>sp|P02817|AMELX_BOVIN Amelogenin, X isoform OS=Bos taurus OX=9913 GN=AMELX PE=1 SV=2	1	hf1_10472_ebo_30_1_261219.ScanId;v=1;d1=22601.22601.5	controllerType=0 controllerNumber=1 scan=22601	47.1935
29336:6	1	S.M[+15.995]PLPPHPGHPGYINFS[+79.966]YEVLTPLKWYQSM[+15.995]IRHP.Y		M[+16]*2, S[+80]	669.997	6	4014.94	4014.92	0	5.4	17	Non	205.09	205.09	0	4.26	1703	>sp|P02817|AMELX_BOVIN Amelogenin, X isoform OS=Bos taurus OX=9913 GN=AMELX PE=1 SV=2	1	hf1_10472_ebo_30_1_261219.ScanId;v=1;d1=22257.22257.6	controllerType=0 controllerNumber=1 scan=22257	46.5702
30294:5	1	S.M[+15.995]PLPPHPGHPGYINFS[+79.966]YEVLTPLKWYQSM[+15.995]IRHP.Y		M[+16]*2, S[+80]	803.793	5	4014.93	4014.92	0	3.1	17	Non	359.73	359.73	5.77	5.93	1703	>sp|P02817|AMELX_BOVIN Amelogenin, X isoform OS=Bos taurus OX=9913 GN=AMELX PE=1 SV=2	1	hf1_10472_ebo_30_1_261219.ScanId;v=1;d1=22888.22888.5	controllerType=0 controllerNumber=1 scan=22888	47.7169
30579:4	1	S.M[+15.995]PLPPHPGHPGYINFS[+79.966]YEVLTPLKWYQSM[+15.995]IRHP.Y		M[+16]*2, S[+80]	1004.49	4	4014.95	4014.92	0	7	17	Non	445.77	445.77	0	7	1703	>sp|P02817|AMELX_BOVIN Amelogenin, X isoform OS=Bos taurus OX=9913 GN=AMELX PE=1 SV=2	1	hf1_10472_ebo_30_1_261219.ScanId;v=1;d1=23075.23075.4	controllerType=0 controllerNumber=1 scan=23075	48.0559
29292:5	1	S.M[+15.995]PLPPHPGHPGYINFS[+79.966]YEVLTPLKWYQSM[+15.995]IRHP.Y		M[+16]*2, S[+80]	803.795	5	4014.94	4014.92	0	5.6	17	Non	457.1	457.1	0	7.59	1703	>sp|P02817|AMELX_BOVIN Amelogenin, X isoform OS=Bos taurus OX=9913 GN=AMELX PE=1 SV=2	1	hf1_10472_ebo_30_1_261219.ScanId;v=1;d1=22227.22227.5	controllerType=0 controllerNumber=1 scan=22227	46.5135
29563:5	1	S.MP[+15.995]LPPHPGHPGYINFS[+79.966]YEVLTPLKW[+15.995]YQSMIRHP.Y		P[+16], S[+80], W[+16]	803.795	5	4014.95	4014.92	0	6.1	17	Non	500.8	500.8	0.21	7.65	1703	>sp|P02817|AMELX_BOVIN Amelogenin, X isoform OS=Bos taurus OX=9913 GN=AMELX PE=1 SV=2	1	hf1_10472_ebo_30_1_261219.ScanId;v=1;d1=22410.22410.5	controllerType=0 controllerNumber=1 scan=22410	46.8522
29378:4	1	S.MP[+15.995]LPPHPGHPGYINFS[+79.966]YEVLTPLKWYQSM[+15.995]IRHP.Y		M[+16], P[+16], S[+80]	1004.49	4	4014.94	4014.92	0	4.6	17	Non	580.21	580.21	9.87	8.11	1703	>sp|P02817|AMELX_BOVIN Amelogenin, X isoform OS=Bos taurus OX=9913 GN=AMELX PE=1 SV=2	1	hf1_10472_ebo_30_1_261219.ScanId;v=1;d1=22282.22282.4	controllerType=0 controllerNumber=1 scan=22282	46.6136
30587:5	1	S.M[+15.995]PLPPHPGHPGYINFS[+79.966]YEVLTPLKWYQSM[+15.995]IRHP.Y		M[+16]*2, S[+80]	803.992	5	4015.93	4014.92	1	1.1	17	Non	584.11	584.11	0	8.54	1703	>sp|P02817|AMELX_BOVIN Amelogenin, X isoform OS=Bos taurus OX=9913 GN=AMELX PE=1 SV=2	1	hf1_10472_ebo_30_1_261219.ScanId;v=1;d1=23081.23081.5	controllerType=0 controllerNumber=1 scan=23081	48.0678
30496:6	1	S.MPLPPHPGHPGYINFSYEVLTPLKWYQSM[+15.995]IRHPY.P		M[+16]	681.009	6	4081.02	4082.02	-1	-0.8	17	Non	101.45	101.45	11.35	1.41	1703	>sp|P02817|AMELX_BOVIN Amelogenin, X isoform OS=Bos taurus OX=9913 GN=AMELX PE=1 SV=2	1	hf1_10472_ebo_30_1_261219.ScanId;v=1;d1=23019.23019.6	controllerType=0 controllerNumber=1 scan=23019	47.9543
30562:5	1	S.MPLPPHPGHPGYINFS[+79.966]YEVLTPLKWY[+15.995]QSMIRHPY.P		S[+80], Y[+16]	833.208	5	4162.01	4161.99	0	5.2	17	Non	202.71	202.71	8.21	3.9	1703	>sp|P02817|AMELX_BOVIN Amelogenin, X isoform OS=Bos taurus OX=9913 GN=AMELX PE=1 SV=2	1	hf1_10472_ebo_30_1_261219.ScanId;v=1;d1=23063.23063.5	controllerType=0 controllerNumber=1 scan=23063	48.0349
29604:5	1	S.MP[+15.995]LPPHPGHPGYINFS[+79.966]YEVLTP[+15.995]LKWYQSMIRHPY.P		P[+16]*2, S[+80]	836.408	5	4178.01	4177.99	0	5.9	17	Non	137.18	43.64	4	1.94	1703	>sp|P02817|AMELX_BOVIN Amelogenin, X isoform OS=Bos taurus OX=9913 GN=AMELX PE=1 SV=2	1	hf1_10472_ebo_30_1_261219.ScanId;v=1;d1=22436.22436.6	controllerType=0 controllerNumber=1 scan=22436	46.8966
31817:6	1	S.MPLPPHPGHPGYINFSYEVLTPLKWYQSMIRHPYP.S			694.517	6	4162.07	4163.08	-1	-2.6	17	Non	126.21	126.21	126.21	1.62	1703	>sp|P02817|AMELX_BOVIN Amelogenin, X isoform OS=Bos taurus OX=9913 GN=AMELX PE=1 SV=2	1	hf1_10472_ebo_30_1_261219.ScanId;v=1;d1=23929.23929.6	controllerType=0 controllerNumber=1 scan=23929	49.6194
31258:6	1	S.MPLPPHPGHPGYINFSYEVLTPLKWYQSMIRHPYP.S			694.519	6	4162.08	4163.08	-1	-0.4	17	Non	127.37	127.37	127.37	1.92	1703	>sp|P02817|AMELX_BOVIN Amelogenin, X isoform OS=Bos taurus OX=9913 GN=AMELX PE=1 SV=2	1	hf1_10472_ebo_30_1_261219.ScanId;v=1;d1=23543.23543.6	controllerType=0 controllerNumber=1 scan=23543	48.9261
34649:6	1	S.MPLPPHPGHPGYINFSYEVLTPLKWYQSMIRHPYP.S			694.519	6	4162.07	4163.08	-1	-1.1	17	Non	133.54	133.54	133.54	1.92	1703	>sp|P02817|AMELX_BOVIN Amelogenin, X isoform OS=Bos taurus OX=9913 GN=AMELX PE=1 SV=2	1	hf1_10472_ebo_30_1_261219.ScanId;v=1;d1=25829.25829.6	controllerType=0 controllerNumber=1 scan=25829	53.0847
30223:5	1	S.MPLPPHPGHPGYINFSYEVLTPLKWYQSMIRHPYP.S			833.225	5	4162.1	4163.08	-1	4.4	17	Non	153.31	64.11	64.11	2.47	1703	>sp|P02817|AMELX_BOVIN Amelogenin, X isoform OS=Bos taurus OX=9913 GN=AMELX PE=1 SV=2	1	hf1_10472_ebo_30_1_261219.ScanId;v=1;d1=22839.22839.5	controllerType=0 controllerNumber=1 scan=22839	47.6259
31530:6	1	S.MPLPPHPGHPGYINFSYEVLTPLKWYQSMIRHPYP.S			694.518	6	4162.07	4163.08	-1	-1.8	17	Non	329.87	284.16	284.16	5.15	1703	>sp|P02817|AMELX_BOVIN Amelogenin, X isoform OS=Bos taurus OX=9913 GN=AMELX PE=1 SV=2	1	hf1_10472_ebo_30_1_261219.ScanId;v=1;d1=23734.23734.6	controllerType=0 controllerNumber=1 scan=23734	49.2726
32975:6	1	S.MPLPPHPGHPGYIN[+0.984]FSYEVLTPLKWYQSMIRHPYP.S		N[+1]	694.85	6	4164.06	4164.07	0	-1.1	17	Non	122.34	76.66	12.74	1.54	1703	>sp|P02817|AMELX_BOVIN Amelogenin, X isoform OS=Bos taurus OX=9913 GN=AMELX PE=1 SV=2	1	hf1_10472_ebo_30_1_261219.ScanId;v=1;d1=24708.24708.6	controllerType=0 controllerNumber=1 scan=24708	51.0073
34939:6	1	S.MPLPPHPGHPGYINFS[+79.966]YEVLTPLKWYQSMIRHPYP.S		S[+80]	708.184	6	4244.07	4243.05	1	4.5	17	Non	158.64	158.64	10.53	3.23	1703	>sp|P02817|AMELX_BOVIN Amelogenin, X isoform OS=Bos taurus OX=9913 GN=AMELX PE=1 SV=2	1	hf1_10472_ebo_30_1_261219.ScanId;v=1;d1=26019.26019.6	controllerType=0 controllerNumber=1 scan=26019	53.4407
30163:6	1	S.MPLPPHPGHPGYINFSYEVLTPLKWYQSMIRH[+15.995]PYP.S		H[+16]	697.185	6	4178.07	4179.08	-1	-0.3	17	Non	159.97	65.8	1.48	1.41	1703	>sp|P02817|AMELX_BOVIN Amelogenin, X isoform OS=Bos taurus OX=9913 GN=AMELX PE=1 SV=2	1	hf1_10472_ebo_30_1_261219.ScanId;v=1;d1=22802.22802.6	controllerType=0 controllerNumber=1 scan=22802	47.5615
32986:6	1	S.MPLPPHPGHPGYIN[+0.984]FSYEVLTPLKWYQSMIRHPYP.S		N[+1]	694.85	6	4164.07	4164.07	0	-0.2	17	Non	181.85	112.9	29.53	1.54	1703	>sp|P02817|AMELX_BOVIN Amelogenin, X isoform OS=Bos taurus OX=9913 GN=AMELX PE=1 SV=2	1	hf1_10472_ebo_30_1_261219.ScanId;v=1;d1=24716.24716.6	controllerType=0 controllerNumber=1 scan=24716	51.0221
26399:5	1	S.M[+15.995]PLPPHPGHPGYINFSYEVLTPLKWYQSMIRHPYP.S		M[+16]	836.622	5	4179.08	4179.08	0	1.2	17	Non	191.34	191.34	32.59	3.52	1703	>sp|P02817|AMELX_BOVIN Amelogenin, X isoform OS=Bos taurus OX=9913 GN=AMELX PE=1 SV=2	1	hf1_10472_ebo_30_1_261219.ScanId;v=1;d1=20314.20314.5	controllerType=0 controllerNumber=1 scan=20314	43.1671
31038:6	1	S.MPLPPHPGHPGYINFSYEVLTPLKWYQSM[+15.995]IRHPYP.S		M[+16]	697.183	6	4178.06	4179.08	-1	-3.7	17	Non	194.2	172.32	4.95	2.86	1703	>sp|P02817|AMELX_BOVIN Amelogenin, X isoform OS=Bos taurus OX=9913 GN=AMELX PE=1 SV=2	1	hf1_10472_ebo_30_1_261219.ScanId;v=1;d1=23386.23386.6	controllerType=0 controllerNumber=1 scan=23386	48.6295
29570:6	1	S.M[+15.995]PLPPHPGHPGYINFSYEVLTPLKWYQSMIRHPYP.S		M[+16]	697.186	6	4178.08	4179.08	-1	1.7	17	Non	224.56	151.69	0.84	2.47	1703	>sp|P02817|AMELX_BOVIN Amelogenin, X isoform OS=Bos taurus OX=9913 GN=AMELX PE=1 SV=2	1	hf1_10472_ebo_30_1_261219.ScanId;v=1;d1=22415.22415.6	controllerType=0 controllerNumber=1 scan=22415	46.8597
30753:6	1	S.MP[+15.995]LPPHPGHPGYINFSYEVLTPLKWYQSMIRHPYP.S		P[+16]	697.184	6	4178.07	4179.08	-1	-2	17	Non	238.13	232.11	5.8	3.29	1703	>sp|P02817|AMELX_BOVIN Amelogenin, X isoform OS=Bos taurus OX=9913 GN=AMELX PE=1 SV=2	1	hf1_10472_ebo_30_1_261219.ScanId;v=1;d1=23192.23192.6	controllerType=0 controllerNumber=1 scan=23192	48.2663
27049:6	1	S.M[+15.995]PLPPHPGHPGYINFSYEVLTPLKWYQSMIRHPYP.S		M[+16]	697.186	6	4178.08	4179.08	-1	0.7	17	Non	245.31	182.68	21.45	4.47	1703	>sp|P02817|AMELX_BOVIN Amelogenin, X isoform OS=Bos taurus OX=9913 GN=AMELX PE=1 SV=2	1	hf1_10472_ebo_30_1_261219.ScanId;v=1;d1=20755.20755.6	controllerType=0 controllerNumber=1 scan=20755	43.9158
28905:4	1	S.M[+15.995]PLPPHPGHPGYINFSYEVLTPLKWYQSMIRHPYP.S		M[+16]	1045.28	4	4178.08	4179.08	-1	1.9	17	Non	251.23	153.42	25.45	3.19	1703	>sp|P02817|AMELX_BOVIN Amelogenin, X isoform OS=Bos taurus OX=9913 GN=AMELX PE=1 SV=2	1	hf1_10472_ebo_30_1_261219.ScanId;v=1;d1=21988.21988.4	controllerType=0 controllerNumber=1 scan=21988	46.0712
27954:5	1	S.M[+15.995]PLPPHPGHPGYINFSYEVLTPLKWYQSMIRHPYP.S		M[+16]	836.422	5	4178.08	4179.08	-1	2.2	17	Non	256.19	80.69	16.3	3.43	1703	>sp|P02817|AMELX_BOVIN Amelogenin, X isoform OS=Bos taurus OX=9913 GN=AMELX PE=1 SV=2	1	hf1_10472_ebo_30_1_261219.ScanId;v=1;d1=21370.21370.5	controllerType=0 controllerNumber=1 scan=21370	44.9779
28605:4	1	S.M[+15.995]PLPPHPGHPGYINFSYEVLTPLKWYQSMIRHPYP.S		M[+16]	1045.27	4	4178.07	4179.08	-1	-2.1	17	Non	259.52	144.3	27.11	2.5	1703	>sp|P02817|AMELX_BOVIN Amelogenin, X isoform OS=Bos taurus OX=9913 GN=AMELX PE=1 SV=2	1	hf1_10472_ebo_30_1_261219.ScanId;v=1;d1=21794.21794.4	controllerType=0 controllerNumber=1 scan=21794	45.7113
27467:5	1	S.M[+15.995]PLPPHPGHPGYINFSYEVLTPLKWYQSMIRHPYP.S		M[+16]	836.822	5	4180.08	4179.08	1	-0.3	17	Non	262.85	181.72	34.43	4.74	1703	>sp|P02817|AMELX_BOVIN Amelogenin, X isoform OS=Bos taurus OX=9913 GN=AMELX PE=1 SV=2	1	hf1_10472_ebo_30_1_261219.ScanId;v=1;d1=21038.21038.5	controllerType=0 controllerNumber=1 scan=21038	44.3992
28901:5	1	S.M[+15.995]PLPPHPGHPGYINFSYEVLTPLKWYQSMIRHPYP.S		M[+16]	836.42	5	4178.07	4179.08	-1	-0.5	17	Non	266.43	255.91	39.68	4.94	1703	>sp|P02817|AMELX_BOVIN Amelogenin, X isoform OS=Bos taurus OX=9913 GN=AMELX PE=1 SV=2	1	hf1_10472_ebo_30_1_261219.ScanId;v=1;d1=21986.21986.5	controllerType=0 controllerNumber=1 scan=21986	46.0682
28999:6	1	S.MPLPPHPGHPGYINFSYEVLTPLKWYQSM[+15.995]IRHPYP.S		M[+16]	697.185	6	4178.07	4179.08	-1	-0.5	17	Non	267.82	127.79	19.37	3.27	1703	>sp|P02817|AMELX_BOVIN Amelogenin, X isoform OS=Bos taurus OX=9913 GN=AMELX PE=1 SV=2	1	hf1_10472_ebo_30_1_261219.ScanId;v=1;d1=22044.22044.6	controllerType=0 controllerNumber=1 scan=22044	46.1736
29879:6	1	S.MP[+15.995]LPPHPGHPGYINFSYEVLTPLKWYQSMIRHPYP.S		P[+16]	697.181	6	4178.05	4179.08	-1	-5.2	17	Non	275.5	198.89	5.8	3.77	1703	>sp|P02817|AMELX_BOVIN Amelogenin, X isoform OS=Bos taurus OX=9913 GN=AMELX PE=1 SV=2	1	hf1_10472_ebo_30_1_261219.ScanId;v=1;d1=22614.22614.6	controllerType=0 controllerNumber=1 scan=22614	47.216
28617:5	1	S.M[+15.995]PLPPHPGHPGYINFSYEVLTPLKWYQSMIRHPYP.S		M[+16]	836.421	5	4178.08	4179.08	-1	0.3	17	Non	287.16	203.85	33.13	5.17	1703	>sp|P02817|AMELX_BOVIN Amelogenin, X isoform OS=Bos taurus OX=9913 GN=AMELX PE=1 SV=2	1	hf1_10472_ebo_30_1_261219.ScanId;v=1;d1=21802.21802.5	controllerType=0 controllerNumber=1 scan=21802	45.7259
30343:6	1	S.MPLPPHPGHPGYINFSYEVLTPLKWYQ[+0.984]SMIRHPYP.S		Q[+1]	694.689	6	4163.1	4164.07	-1	8.8	17	Non	293.69	228.35	17.51	5.19	1703	>sp|P02817|AMELX_BOVIN Amelogenin, X isoform OS=Bos taurus OX=9913 GN=AMELX PE=1 SV=2	1	hf1_10472_ebo_30_1_261219.ScanId;v=1;d1=22922.22922.6	controllerType=0 controllerNumber=1 scan=22922	47.7826
30738:5	1	S.MP[+15.995]LPPHPGHPGYINFSYEVLTPLKWYQSMIRHPYP.S		P[+16]	836.421	5	4178.07	4179.08	-1	0.1	17	Non	299.98	220.06	4	5.17	1703	>sp|P02817|AMELX_BOVIN Amelogenin, X isoform OS=Bos taurus OX=9913 GN=AMELX PE=1 SV=2	1	hf1_10472_ebo_30_1_261219.ScanId;v=1;d1=23181.23181.5	controllerType=0 controllerNumber=1 scan=23181	48.2469
50208:6	1	S.MP[+15.995]LPPHPGHPGYINFSYEVLTPLKWYQSMIRHPYP.S		P[+16]	697.186	6	4178.08	4179.08	-1	1.3	17	Non	304.35	249.32	5.8	5.11	1703	>sp|P02817|AMELX_BOVIN Amelogenin, X isoform OS=Bos taurus OX=9913 GN=AMELX PE=1 SV=2	1	hf1_10472_ebo_30_1_261219.ScanId;v=1;d1=36445.36445.6	controllerType=0 controllerNumber=1 scan=36445	73.5825
29528:4	1	S.M[+15.995]PLPPHPGHPGYINFSYEVLTPLKWYQSMIRHPYP.S		M[+16]	1045.28	4	4178.09	4179.08	-1	4.8	17	Non	316.5	204.14	20.57	5.18	1703	>sp|P02817|AMELX_BOVIN Amelogenin, X isoform OS=Bos taurus OX=9913 GN=AMELX PE=1 SV=2	1	hf1_10472_ebo_30_1_261219.ScanId;v=1;d1=22387.22387.4	controllerType=0 controllerNumber=1 scan=22387	46.809
33273:6	1	S.MPLPPHPGHPGYIN[+0.984]FSYEVLTPLKWYQSMIRHPYP.S		N[+1]	694.852	6	4164.08	4164.07	0	2.4	17	Non	342.47	342.47	13.15	5.65	1703	>sp|P02817|AMELX_BOVIN Amelogenin, X isoform OS=Bos taurus OX=9913 GN=AMELX PE=1 SV=2	1	hf1_10472_ebo_30_1_261219.ScanId;v=1;d1=24910.24910.6	controllerType=0 controllerNumber=1 scan=24910	51.3731
27494:6	1	S.M[+15.995]PLPPHPGHPGYINFSYEVLTPLKWYQSMIRHPYP.S		M[+16]	697.518	6	4180.07	4179.08	1	-2.4	17	Non	357.76	262.26	24.35	5.06	1703	>sp|P02817|AMELX_BOVIN Amelogenin, X isoform OS=Bos taurus OX=9913 GN=AMELX PE=1 SV=2	1	hf1_10472_ebo_30_1_261219.ScanId;v=1;d1=21055.21055.6	controllerType=0 controllerNumber=1 scan=21055	44.4298
31833:4	1	S.M[+15.995]PLPPHPGHPGYINFSYEVLTPLKWYQSMIRHPYP.S		M[+16]	1045.27	4	4178.05	4179.08	-1	-5	17	Non	360.33	237.2	16.05	4.2	1703	>sp|P02817|AMELX_BOVIN Amelogenin, X isoform OS=Bos taurus OX=9913 GN=AMELX PE=1 SV=2	1	hf1_10472_ebo_30_1_261219.ScanId;v=1;d1=23939.23939.4	controllerType=0 controllerNumber=1 scan=23939	49.6359
27169:5	1	S.M[+15.995]PLPPHPGHPGYINFSYEVLTPLKWYQSMIRHPYP.S		M[+16]	836.422	5	4178.08	4179.08	-1	1.6	17	Non	361.29	306.78	29.37	5.61	1703	>sp|P02817|AMELX_BOVIN Amelogenin, X isoform OS=Bos taurus OX=9913 GN=AMELX PE=1 SV=2	1	hf1_10472_ebo_30_1_261219.ScanId;v=1;d1=20831.20831.5	controllerType=0 controllerNumber=1 scan=20831	44.0452
30453:6	1	S.MPLPPHPGHPGYINFSYEVLTPLKWYQSM[+15.995]IRHPYP.S		M[+16]	697.519	6	4180.08	4179.08	1	-0.5	17	Non	384.9	384.9	15.68	6.47	1703	>sp|P02817|AMELX_BOVIN Amelogenin, X isoform OS=Bos taurus OX=9913 GN=AMELX PE=1 SV=2	1	hf1_10472_ebo_30_1_261219.ScanId;v=1;d1=22991.22991.6	controllerType=0 controllerNumber=1 scan=22991	47.9064
30473:4	1	S.M[+15.995]PLPPHPGHPGYINFSYEVLTPLKWYQSMIRHPYP.S		M[+16]	1045.27	4	4178.06	4179.08	-1	-2.3	17	Non	393.29	247.47	3.58	4.64	1703	>sp|P02817|AMELX_BOVIN Amelogenin, X isoform OS=Bos taurus OX=9913 GN=AMELX PE=1 SV=2	1	hf1_10472_ebo_30_1_261219.ScanId;v=1;d1=23005.23005.4	controllerType=0 controllerNumber=1 scan=23005	47.9304
36694:4	1	S.MPLPPHPGHPGYINFS[+79.966]YEVLTPLKWYQSMIRHPYP.S		S[+80]	1061.52	4	4243.05	4243.05	0	1.2	17	Non	396.87	396.87	25.1	6.23	1703	>sp|P02817|AMELX_BOVIN Amelogenin, X isoform OS=Bos taurus OX=9913 GN=AMELX PE=1 SV=2	1	hf1_10472_ebo_30_1_261219.ScanId;v=1;d1=27151.27151.4	controllerType=0 controllerNumber=1 scan=27151	55.4885
29219:5	1	S.MPLPPHPGHPGYINFSYEVLTPLKWY[+15.995]QSMIRHPYP.S		Y[+16]	836.423	5	4178.09	4179.08	-1	3.3	17	Non	416.13	294.49	11.54	5.75	1703	>sp|P02817|AMELX_BOVIN Amelogenin, X isoform OS=Bos taurus OX=9913 GN=AMELX PE=1 SV=2	1	hf1_10472_ebo_30_1_261219.ScanId;v=1;d1=22179.22179.5	controllerType=0 controllerNumber=1 scan=22179	46.4239
30442:5	1	S.MPLPPHPGHPGYINFSYEVLTPLKWYQSM[+15.995]IRHPYP.S		M[+16]	836.421	5	4178.08	4179.08	-1	0.5	17	Non	499.95	371.81	31.66	7.49	1703	>sp|P02817|AMELX_BOVIN Amelogenin, X isoform OS=Bos taurus OX=9913 GN=AMELX PE=1 SV=2	1	hf1_10472_ebo_30_1_261219.ScanId;v=1;d1=22984.22984.5	controllerType=0 controllerNumber=1 scan=22984	47.893
36607:6	1	S.MPLPPHPGHPGYINFS[+79.966]YEVLTPLKWYQ[+0.984]SMIRHPYP.S		Q[+1], S[+80]	708.183	6	4244.06	4244.03	0	6.5	17	Non	60.73	60.73	4.63	2.39	1703	>sp|P02817|AMELX_BOVIN Amelogenin, X isoform OS=Bos taurus OX=9913 GN=AMELX PE=1 SV=2	1	hf1_10472_ebo_30_1_261219.ScanId;v=1;d1=27093.27093.6	controllerType=0 controllerNumber=1 scan=27093	55.3808
25715:5	1	S.MP[+15.995]LPPHPGHPGYINFSYEVLTPLKWY[+15.995]QSMIRHPYP.S		P[+16], Y[+16]	839.826	5	4195.1	4195.07	0	7.2	17	Non	68.84	68.84	4	1.75	1703	>sp|P02817|AMELX_BOVIN Amelogenin, X isoform OS=Bos taurus OX=9913 GN=AMELX PE=1 SV=2	1	hf1_10472_ebo_30_1_261219.ScanId;v=1;d1=19843.19843.3	controllerType=0 controllerNumber=1 scan=19843	42.3732
26844:5	1	S.MP[+15.995]LPPHPGHPGYINFSYEVLTPLKWYQSMIRH[+15.995]PYP.S		H[+16], P[+16]	839.827	5	4195.1	4195.07	0	7.8	17	Non	80.8	80.8	4	1.74	1703	>sp|P02817|AMELX_BOVIN Amelogenin, X isoform OS=Bos taurus OX=9913 GN=AMELX PE=1 SV=2	1	hf1_10472_ebo_30_1_261219.ScanId;v=1;d1=20621.20621.3	controllerType=0 controllerNumber=1 scan=20621	43.6925
36912:6	1	S.MPLPPHPGHPGYINFS[+79.966]YEVLTPLKWYQSMIR[+0.984]HPYP.S		R[+1], S[+80]	708.182	6	4244.05	4244.03	0	5.1	17	Non	87.13	87.13	4.76	2.79	1703	>sp|P02817|AMELX_BOVIN Amelogenin, X isoform OS=Bos taurus OX=9913 GN=AMELX PE=1 SV=2	1	hf1_10472_ebo_30_1_261219.ScanId;v=1;d1=27290.27290.6	controllerType=0 controllerNumber=1 scan=27290	55.7416
26439:7	1	S.M[+15.995]PLPPHPGHPGYINFSYEVLTPLKWY[+15.995]QSMIRHPYP.S		M[+16], Y[+16]	600.161	7	4195.08	4195.07	0	2.9	17	Non	110.91	110.91	0	1.33	1703	>sp|P02817|AMELX_BOVIN Amelogenin, X isoform OS=Bos taurus OX=9913 GN=AMELX PE=1 SV=2	1	hf1_10472_ebo_30_1_261219.ScanId;v=1;d1=20341.20341.7	controllerType=0 controllerNumber=1 scan=20341	43.2092
28166:6	1	S.MP[+15.995]LPPHPGHPGYINFSYEVLTPLKWYQSM[+31.990]IRHPYP.S		M[+32], P[+16]	702.852	6	4212.08	4211.07	1	1.4	17	Non	128.43	128.43	0	1.3	1703	>sp|P02817|AMELX_BOVIN Amelogenin, X isoform OS=Bos taurus OX=9913 GN=AMELX PE=1 SV=2	1	hf1_10472_ebo_30_1_261219.ScanId;v=1;d1=21510.21510.2	controllerType=0 controllerNumber=1 scan=21510	45.2196
27397:5	1	S.MP[+15.995]LPPHPGHPGYINFSYEVLTPLKWYQSM[+31.990]IRHPYP.S		M[+32], P[+16]	842.824	5	4210.09	4211.07	-1	6.8	17	Non	146.94	115.06	4	1.51	1703	>sp|P02817|AMELX_BOVIN Amelogenin, X isoform OS=Bos taurus OX=9913 GN=AMELX PE=1 SV=2	1	hf1_10472_ebo_30_1_261219.ScanId;v=1;d1=20991.20991.5	controllerType=0 controllerNumber=1 scan=20991	44.3185
30421:5	1	S.M[+15.995]PLPPHPGHPGYINFSYEVLTPLKWYQSMIR[+0.984]HPYP.S		M[+16], R[+1]	837.025	5	4181.1	4180.06	1	7.3	17	Non	158.98	15.44	15.44	1.44	1703	>sp|P02817|AMELX_BOVIN Amelogenin, X isoform OS=Bos taurus OX=9913 GN=AMELX PE=1 SV=2	1	hf1_10472_ebo_30_1_261219.ScanId;v=1;d1=22971.22971.4	controllerType=0 controllerNumber=1 scan=22971	47.8709
27542:5	1	S.MP[+15.995]LPPHPGHPGYINFSYEVLTPLKW[+31.990]YQSMIRHPYP.S		P[+16], W[+32]	842.822	5	4210.08	4211.07	-1	4.2	17	Non	161.93	64.8	0	1.59	1703	>sp|P02817|AMELX_BOVIN Amelogenin, X isoform OS=Bos taurus OX=9913 GN=AMELX PE=1 SV=2	1	hf1_10472_ebo_30_1_261219.ScanId;v=1;d1=21090.21090.4	controllerType=0 controllerNumber=1 scan=21090	44.4891
35208:4	1	S.MP[+15.995]LPPHPGHPGYINFS[+79.966]YEVLTPLKWYQSMIRHPYP.S		P[+16], S[+80]	1065.52	4	4259.06	4259.04	0	4.1	17	Non	165.06	165.06	4	2.62	1703	>sp|P02817|AMELX_BOVIN Amelogenin, X isoform OS=Bos taurus OX=9913 GN=AMELX PE=1 SV=2	1	hf1_10472_ebo_30_1_261219.ScanId;v=1;d1=26196.26196.2	controllerType=0 controllerNumber=1 scan=26196	53.7593
29342:6	1	S.M[+15.995]PLPPHPGHPGYINFSYEVLTP[+31.990]LKWYQSMIRHPYP.S		M[+16], P[+32]	702.851	6	4212.07	4211.07	1	-0.4	17	Non	170.11	170.11	4.99	2.62	1703	>sp|P02817|AMELX_BOVIN Amelogenin, X isoform OS=Bos taurus OX=9913 GN=AMELX PE=1 SV=2	1	hf1_10472_ebo_30_1_261219.ScanId;v=1;d1=22260.22260.6	controllerType=0 controllerNumber=1 scan=22260	46.5747
29782:5	1	S.M[+15.995]PLPPHPGHPGYINFSYEVLTPLKW[+31.990]YQSMIRHPYP.S		M[+16], W[+32]	843.219	5	4212.06	4211.07	1	-1.4	17	Non	175.14	84.42	0.2	2.26	1703	>sp|P02817|AMELX_BOVIN Amelogenin, X isoform OS=Bos taurus OX=9913 GN=AMELX PE=1 SV=2	1	hf1_10472_ebo_30_1_261219.ScanId;v=1;d1=22552.22552.5	controllerType=0 controllerNumber=1 scan=22552	47.1054
29015:6	1	S.M[+15.995]PLPPHPGHPGYINFSYEVLTPLKWY[+31.990]QSMIRHPYP.S		M[+16], Y[+32]	702.518	6	4210.07	4211.07	-1	1.8	17	Non	219.85	154.88	2.54	2.47	1703	>sp|P02817|AMELX_BOVIN Amelogenin, X isoform OS=Bos taurus OX=9913 GN=AMELX PE=1 SV=2	1	hf1_10472_ebo_30_1_261219.ScanId;v=1;d1=22054.22054.6	controllerType=0 controllerNumber=1 scan=22054	46.1916
29264:5	1	S.M[+15.995]PLPPHPGHPGYINFSYEVLTP[+31.990]LKWYQSMIRHPYP.S		M[+16], P[+32]	843.023	5	4211.08	4211.07	0	4.2	17	Non	247.35	247.35	2.68	5.34	1703	>sp|P02817|AMELX_BOVIN Amelogenin, X isoform OS=Bos taurus OX=9913 GN=AMELX PE=1 SV=2	1	hf1_10472_ebo_30_1_261219.ScanId;v=1;d1=22209.22209.5	controllerType=0 controllerNumber=1 scan=22209	46.4807
31823:5	1	S.MPLPPHPGHPGYINFSYEVLTPLKWYQ[+0.984]SM[+15.995]IRHPYP.S		M[+16], Q[+1]	836.617	5	4179.06	4180.06	-1	0	17	Non	250.97	250.97	7.69	5.11	1703	>sp|P02817|AMELX_BOVIN Amelogenin, X isoform OS=Bos taurus OX=9913 GN=AMELX PE=1 SV=2	1	hf1_10472_ebo_30_1_261219.ScanId;v=1;d1=23934.23934.5	controllerType=0 controllerNumber=1 scan=23934	49.6285
27603:5	1	S.M[+15.995]PLPPHPGHPGYINFSYEVLTPLKW[+15.995]YQSMIRHPYP.S		M[+16], W[+16]	839.62	5	4194.07	4195.07	-1	0.1	17	Non	252.4	252.4	1.69	5.11	1703	>sp|P02817|AMELX_BOVIN Amelogenin, X isoform OS=Bos taurus OX=9913 GN=AMELX PE=1 SV=2	1	hf1_10472_ebo_30_1_261219.ScanId;v=1;d1=21132.21132.5	controllerType=0 controllerNumber=1 scan=21132	44.5656
30520:6	1	S.MPLPPHPGHPGYINFS[+79.966]YEVLTPLKW[+15.995]YQSMIRHPYP.S		S[+80], W[+16]	710.685	6	4259.07	4259.04	0	6.5	17	Non	259.4	259.4	0	5.63	1703	>sp|P02817|AMELX_BOVIN Amelogenin, X isoform OS=Bos taurus OX=9913 GN=AMELX PE=1 SV=2	1	hf1_10472_ebo_30_1_261219.ScanId;v=1;d1=23035.23035.6	controllerType=0 controllerNumber=1 scan=23035	47.9842
31669:6	1	S.MPLPPHPGHPGYINFS[+79.966]YEVLTPLKWYQSM[+15.995]IRHPYP.S		M[+16], S[+80]	710.848	6	4260.05	4259.04	1	0.8	17	Non	313.6	313.6	9.73	5.38	1703	>sp|P02817|AMELX_BOVIN Amelogenin, X isoform OS=Bos taurus OX=9913 GN=AMELX PE=1 SV=2	1	hf1_10472_ebo_30_1_261219.ScanId;v=1;d1=23827.23827.6	controllerType=0 controllerNumber=1 scan=23827	49.4409
28224:5	1	S.M[+15.995]PLPPHPGHPGYINFSYEVLTPLKW[+15.995]YQSMIRHPYP.S		M[+16], W[+16]	839.624	5	4194.09	4195.07	-1	4.8	17	Non	321.94	321.94	0.46	6.37	1703	>sp|P02817|AMELX_BOVIN Amelogenin, X isoform OS=Bos taurus OX=9913 GN=AMELX PE=1 SV=2	1	hf1_10472_ebo_30_1_261219.ScanId;v=1;d1=21553.21553.5	controllerType=0 controllerNumber=1 scan=21553	45.2955
31754:6	1	S.MPLPPHPGHPGYINFSYEVLTPLKWYQ[+0.984]SM[+15.995]IRHPYP.S		M[+16], Q[+1]	697.516	6	4180.06	4180.06	0	0.4	17	Non	328.78	328.78	14.74	5.55	1703	>sp|P02817|AMELX_BOVIN Amelogenin, X isoform OS=Bos taurus OX=9913 GN=AMELX PE=1 SV=2	1	hf1_10472_ebo_30_1_261219.ScanId;v=1;d1=23886.23886.6	controllerType=0 controllerNumber=1 scan=23886	49.5425
31285:6	1	S.MP[+15.995]LPPHPGHPGYINFSYEVLTPLKWYQSM[+15.995]IRHPYP.S		M[+16], P[+16]	700.184	6	4196.07	4195.07	1	-2.3	17	Non	328.96	328.96	0	5.26	1703	>sp|P02817|AMELX_BOVIN Amelogenin, X isoform OS=Bos taurus OX=9913 GN=AMELX PE=1 SV=2	1	hf1_10472_ebo_30_1_261219.ScanId;v=1;d1=23565.23565.6	controllerType=0 controllerNumber=1 scan=23565	48.9704
33849:6	1	S.MP[+15.995]LPPHPGHPGYIN[+0.984]FSYEVLTPLKWYQSMIRHPYP.S		N[+1], P[+16]	697.688	6	4181.09	4180.06	1	5.7	17	Non	341.88	338.93	0.67	6.41	1703	>sp|P02817|AMELX_BOVIN Amelogenin, X isoform OS=Bos taurus OX=9913 GN=AMELX PE=1 SV=2	1	hf1_10472_ebo_30_1_261219.ScanId;v=1;d1=25299.25299.6	controllerType=0 controllerNumber=1 scan=25299	52.0972
31083:6	1	S.MPLPPHPGHPGYINFS[+79.966]YEVLTPLKWY[+15.995]QSMIRHPYP.S		S[+80], Y[+16]	710.516	6	4258.06	4259.04	-1	4.8	17	Non	353.02	353.02	23.54	6.09	1703	>sp|P02817|AMELX_BOVIN Amelogenin, X isoform OS=Bos taurus OX=9913 GN=AMELX PE=1 SV=2	1	hf1_10472_ebo_30_1_261219.ScanId;v=1;d1=23419.23419.6	controllerType=0 controllerNumber=1 scan=23419	48.6936
32058:6	1	S.MP[+15.995]LPPHPGHPGYIN[+0.984]FSYEVLTPLKWYQSMIRHPYP.S		N[+1], P[+16]	697.348	6	4179.05	4180.06	-1	-1.1	17	Non	360.75	360.75	4.58	6.17	1703	>sp|P02817|AMELX_BOVIN Amelogenin, X isoform OS=Bos taurus OX=9913 GN=AMELX PE=1 SV=2	1	hf1_10472_ebo_30_1_261219.ScanId;v=1;d1=24088.24088.6	controllerType=0 controllerNumber=1 scan=24088	49.8978
28304:6	1	S.M[+15.995]PLPPHPGHPGYINFSYEVLTPLKWY[+31.990]QSMIRHPYP.S		M[+16], Y[+32]	702.686	6	4211.08	4211.07	0	3	17	Non	367.66	367.66	0	6.59	1703	>sp|P02817|AMELX_BOVIN Amelogenin, X isoform OS=Bos taurus OX=9913 GN=AMELX PE=1 SV=2	1	hf1_10472_ebo_30_1_261219.ScanId;v=1;d1=21601.21601.6	controllerType=0 controllerNumber=1 scan=21601	45.3773
34455:6	1	S.MP[+15.995]LPPHPGHPGYINFS[+79.966]YEVLTPLKWYQSMIRHPYP.S		P[+16], S[+80]	710.517	6	4258.07	4259.04	-1	6	17	Non	383.04	383.04	14.04	7.08	1703	>sp|P02817|AMELX_BOVIN Amelogenin, X isoform OS=Bos taurus OX=9913 GN=AMELX PE=1 SV=2	1	hf1_10472_ebo_30_1_261219.ScanId;v=1;d1=25704.25704.6	controllerType=0 controllerNumber=1 scan=25704	52.8518
32485:4	1	S.MPLPPHPGHPGYINFS[+79.966]YEVLTPLKWY[+15.995]QSMIRHPYP.S		S[+80], Y[+16]	1065.77	4	4260.04	4259.04	1	-1.1	17	Non	403.45	403.45	4.6	6.12	1703	>sp|P02817|AMELX_BOVIN Amelogenin, X isoform OS=Bos taurus OX=9913 GN=AMELX PE=1 SV=2	1	hf1_10472_ebo_30_1_261219.ScanId;v=1;d1=24379.24379.4	controllerType=0 controllerNumber=1 scan=24379	50.4178
31972:6	1	S.MPLPPHPGHPGYINFS[+79.966]YEVLTPLKWY[+15.995]QSMIRHPYP.S		S[+80], Y[+16]	710.848	6	4260.05	4259.04	1	1.6	17	Non	412.46	412.46	3.28	6.69	1703	>sp|P02817|AMELX_BOVIN Amelogenin, X isoform OS=Bos taurus OX=9913 GN=AMELX PE=1 SV=2	1	hf1_10472_ebo_30_1_261219.ScanId;v=1;d1=24029.24029.6	controllerType=0 controllerNumber=1 scan=24029	49.7919
30212:6	1	S.MP[+15.995]LPPHPGHPGYINFSYEVLTPLKWYQSM[+15.995]IRHPYP.S		M[+16], P[+16]	699.85	6	4194.06	4195.07	-1	-1.1	17	Non	425.34	425.34	5.63	6.36	1703	>sp|P02817|AMELX_BOVIN Amelogenin, X isoform OS=Bos taurus OX=9913 GN=AMELX PE=1 SV=2	1	hf1_10472_ebo_30_1_261219.ScanId;v=1;d1=22833.22833.6	controllerType=0 controllerNumber=1 scan=22833	47.6168
30967:4	1	S.M[+15.995]PLPPHPGHPGYINFSYEVLTPLKWYQSM[+15.995]IRHPYP.S		M[+16]*2	1049.77	4	4196.05	4195.07	1	-7	17	Non	440.3	440.3	0	5.49	1703	>sp|P02817|AMELX_BOVIN Amelogenin, X isoform OS=Bos taurus OX=9913 GN=AMELX PE=1 SV=2	1	hf1_10472_ebo_30_1_261219.ScanId;v=1;d1=23336.23336.4	controllerType=0 controllerNumber=1 scan=23336	48.5316
28437:6	1	S.M[+15.995]PLPPHPGHPGYINFSYEVLTPLKWYQSM[+15.995]IRHPYP.S		M[+16]*2	700.02	6	4195.08	4195.07	0	2.6	17	Non	475.61	475.61	0	6.6	1703	>sp|P02817|AMELX_BOVIN Amelogenin, X isoform OS=Bos taurus OX=9913 GN=AMELX PE=1 SV=2	1	hf1_10472_ebo_30_1_261219.ScanId;v=1;d1=21688.21688.6	controllerType=0 controllerNumber=1 scan=21688	45.5315
50226:6	1	S.MP[+15.995]LPPHPGHPGYINFSYEVLTPLKWYQSM[+15.995]IRHPYP.S		M[+16], P[+16]	700.023	6	4195.1	4195.07	0	6.7	17	Non	497.63	497.63	0	7.41	1703	>sp|P02817|AMELX_BOVIN Amelogenin, X isoform OS=Bos taurus OX=9913 GN=AMELX PE=1 SV=2	1	hf1_10472_ebo_30_1_261219.ScanId;v=1;d1=36457.36457.6	controllerType=0 controllerNumber=1 scan=36457	73.6044
29916:6	1	S.MP[+15.995]LPPHPGHPGYINFSYEVLTPLKW[+15.995]YQSMIRHPYP.S		P[+16], W[+16]	700.186	6	4196.08	4195.07	1	0.7	17	Non	499.46	499.46	0.64	6.67	1703	>sp|P02817|AMELX_BOVIN Amelogenin, X isoform OS=Bos taurus OX=9913 GN=AMELX PE=1 SV=2	1	hf1_10472_ebo_30_1_261219.ScanId;v=1;d1=22640.22640.6	controllerType=0 controllerNumber=1 scan=22640	47.2638
34091:5	1	S.M[+15.995]PLPPHPGHPGYINFS[+79.966]YEVLTPLKWYQSMIRHPYP.S		M[+16], S[+80]	852.416	5	4258.05	4259.04	-1	2.9	17	Non	504.52	504.52	6.3	6.88	1703	>sp|P02817|AMELX_BOVIN Amelogenin, X isoform OS=Bos taurus OX=9913 GN=AMELX PE=1 SV=2	1	hf1_10472_ebo_30_1_261219.ScanId;v=1;d1=25460.25460.5	controllerType=0 controllerNumber=1 scan=25460	52.3966
27902:5	1	S.M[+15.995]PLPPHPGHPGYINFSYEVLTPLKW[+15.995]YQSMIRHPYP.S		M[+16], W[+16]	839.628	5	4194.11	4195.07	-1	9.4	17	Non	511.46	511.46	1.99	7.08	1703	>sp|P02817|AMELX_BOVIN Amelogenin, X isoform OS=Bos taurus OX=9913 GN=AMELX PE=1 SV=2	1	hf1_10472_ebo_30_1_261219.ScanId;v=1;d1=21336.21336.5	controllerType=0 controllerNumber=1 scan=21336	44.9159
31091:5	1	S.MPLPPHPGHPGYINFS[+79.966]YEVLTPLKWYQSM[+15.995]IRHPYP.S		M[+16], S[+80]	852.62	5	4259.07	4259.04	0	6.8	17	Non	517.44	517.44	7.69	7.59	1703	>sp|P02817|AMELX_BOVIN Amelogenin, X isoform OS=Bos taurus OX=9913 GN=AMELX PE=1 SV=2	1	hf1_10472_ebo_30_1_261219.ScanId;v=1;d1=23424.23424.5	controllerType=0 controllerNumber=1 scan=23424	48.7039
34180:6	1	S.MP[+15.995]LPPHPGHPGYINFS[+79.966]YEVLTPLKWYQSMIRHPYP.S		P[+16], S[+80]	710.685	6	4259.07	4259.04	0	6.9	17	Non	540.09	540.09	5.8	8.12	1703	>sp|P02817|AMELX_BOVIN Amelogenin, X isoform OS=Bos taurus OX=9913 GN=AMELX PE=1 SV=2	1	hf1_10472_ebo_30_1_261219.ScanId;v=1;d1=25518.25518.6	controllerType=0 controllerNumber=1 scan=25518	52.5002
30815:6	1	S.MPLPPHPGHPGYINFS[+79.966]YEVLTPLKWYQSM[+15.995]IRHPYP.S		M[+16], S[+80]	710.683	6	4259.06	4259.04	0	4.8	17	Non	544.78	544.78	21.97	8.19	1703	>sp|P02817|AMELX_BOVIN Amelogenin, X isoform OS=Bos taurus OX=9913 GN=AMELX PE=1 SV=2	1	hf1_10472_ebo_30_1_261219.ScanId;v=1;d1=23235.23235.6	controllerType=0 controllerNumber=1 scan=23235	48.3426
27813:6	1	S.MP[+15.995]LPPHPGHPGYINFSYEVLTPLKWYQSM[+15.995]IRHPYP.S		M[+16], P[+16]	700.023	6	4195.1	4195.07	0	6.8	17	Non	596.02	596.02	1.8	8.9	1703	>sp|P02817|AMELX_BOVIN Amelogenin, X isoform OS=Bos taurus OX=9913 GN=AMELX PE=1 SV=2	1	hf1_10472_ebo_30_1_261219.ScanId;v=1;d1=21274.21274.6	controllerType=0 controllerNumber=1 scan=21274	44.8066
29330:6	1	S.MP[+15.995]LPPHPGHPGYINFSYEVLTPLKWYQSM[+15.995]IRHPYP.S		M[+16], P[+16]	700.184	6	4196.07	4195.07	1	-1.7	17	Non	614.18	614.18	0	9.09	1703	>sp|P02817|AMELX_BOVIN Amelogenin, X isoform OS=Bos taurus OX=9913 GN=AMELX PE=1 SV=2	1	hf1_10472_ebo_30_1_261219.ScanId;v=1;d1=22253.22253.6	controllerType=0 controllerNumber=1 scan=22253	46.5641
29615:6	1	S.M[+15.995]PLPPHPGHPGYINFSYEVLTPLKWY[+15.995]QSMIRHPYP.S		M[+16], Y[+16]	700.185	6	4196.08	4195.07	1	0	17	Non	617.73	617.73	6.15	9.09	1703	>sp|P02817|AMELX_BOVIN Amelogenin, X isoform OS=Bos taurus OX=9913 GN=AMELX PE=1 SV=2	1	hf1_10472_ebo_30_1_261219.ScanId;v=1;d1=22443.22443.6	controllerType=0 controllerNumber=1 scan=22443	46.9099
29729:5	1	S.MP[+15.995]LPPHPGHPGYINFSYEVLTPLKWYQSM[+15.995]IRHPYP.S		M[+16], P[+16]	840.024	5	4196.09	4195.07	1	4.1	17	Non	629.2	629.2	3.88	9.63	1703	>sp|P02817|AMELX_BOVIN Amelogenin, X isoform OS=Bos taurus OX=9913 GN=AMELX PE=1 SV=2	1	hf1_10472_ebo_30_1_261219.ScanId;v=1;d1=22520.22520.5	controllerType=0 controllerNumber=1 scan=22520	47.0487
50183:5	1	S.MPLPPHPGHPGYINFS[+79.966]YEVLTPLKWY[+15.995]QSMIRHPYP.S		S[+80], Y[+16]	852.816	5	4260.05	4259.04	1	1.4	17	Non	633.34	633.34	13.39	8.84	1703	>sp|P02817|AMELX_BOVIN Amelogenin, X isoform OS=Bos taurus OX=9913 GN=AMELX PE=1 SV=2	1	hf1_10472_ebo_30_1_261219.ScanId;v=1;d1=36425.36425.5	controllerType=0 controllerNumber=1 scan=36425	73.5464
30542:4	1	S.MPLPPHPGHPGYINFS[+79.966]YEVLTPLKWYQSM[+15.995]IRHPYP.S		M[+16], S[+80]	1065.52	4	4259.06	4259.04	0	4.9	17	Non	694.56	694.56	34.4	10.01	1703	>sp|P02817|AMELX_BOVIN Amelogenin, X isoform OS=Bos taurus OX=9913 GN=AMELX PE=1 SV=2	1	hf1_10472_ebo_30_1_261219.ScanId;v=1;d1=23050.23050.5	controllerType=0 controllerNumber=1 scan=23050	48.0124
30832:5	1	S.MPLPPHPGHPGYINFS[+79.966]YEVLTPLKWYQSM[+15.995]IRHPYP.S		M[+16], S[+80]	852.62	5	4259.07	4259.04	0	5.9	17	Non	718.78	718.78	14.45	12.24	1703	>sp|P02817|AMELX_BOVIN Amelogenin, X isoform OS=Bos taurus OX=9913 GN=AMELX PE=1 SV=2	1	hf1_10472_ebo_30_1_261219.ScanId;v=1;d1=23246.23246.5	controllerType=0 controllerNumber=1 scan=23246	48.3619
35428:5	1	S.MP[+15.995]LPPHPGHPGYINFS[+79.966]YEVLTPLKWYQSMIRHPYP.S		P[+16], S[+80]	852.816	5	4260.05	4259.04	1	1.2	17	Non	732.82	732.82	4	11.54	1703	>sp|P02817|AMELX_BOVIN Amelogenin, X isoform OS=Bos taurus OX=9913 GN=AMELX PE=1 SV=2	1	hf1_10472_ebo_30_1_261219.ScanId;v=1;d1=26341.26341.5	controllerType=0 controllerNumber=1 scan=26341	54.03
29440:5	1	S.M[+15.995]PLPPHPGHPGYINFSYEVLTPLKWYQSM[+15.995]IRHPYP.S		M[+16]*2	840.022	5	4196.08	4195.07	1	1.7	17	Non	739.89	739.89	0.98	11.54	1703	>sp|P02817|AMELX_BOVIN Amelogenin, X isoform OS=Bos taurus OX=9913 GN=AMELX PE=1 SV=2	1	hf1_10472_ebo_30_1_261219.ScanId;v=1;d1=22326.22326.5	controllerType=0 controllerNumber=1 scan=22326	46.6999
28745:6	1	S.M[+15.995]PLPPHPGHPGYINFSYEVLTPLKWYQSM[+15.995]IRHPYP.S		M[+16]*2	700.023	6	4195.1	4195.07	0	6.4	17	Non	742.14	742.14	0	11.9	1703	>sp|P02817|AMELX_BOVIN Amelogenin, X isoform OS=Bos taurus OX=9913 GN=AMELX PE=1 SV=2	1	hf1_10472_ebo_30_1_261219.ScanId;v=1;d1=21883.21883.6	controllerType=0 controllerNumber=1 scan=21883	45.8715
28584:5	1	S.M[+15.995]PLPPHPGHPGYINFSYEVLTPLKWYQSM[+15.995]IRHPYP.S		M[+16]*2	839.824	5	4195.09	4195.07	0	4	17	Non	767.72	767.72	2.23	12.63	1703	>sp|P02817|AMELX_BOVIN Amelogenin, X isoform OS=Bos taurus OX=9913 GN=AMELX PE=1 SV=2	1	hf1_10472_ebo_30_1_261219.ScanId;v=1;d1=21782.21782.5	controllerType=0 controllerNumber=1 scan=21782	45.6904
34367:5	1	S.MP[+15.995]LPPHPGHPGYINFS[+79.966]YEVLTPLKWYQSMIRHPYP.S		P[+16], S[+80]	852.621	5	4259.08	4259.04	0	7.6	17	Non	771.44	771.44	12.81	13.18	1703	>sp|P02817|AMELX_BOVIN Amelogenin, X isoform OS=Bos taurus OX=9913 GN=AMELX PE=1 SV=2	1	hf1_10472_ebo_30_1_261219.ScanId;v=1;d1=25645.25645.5	controllerType=0 controllerNumber=1 scan=25645	52.739
31978:5	1	S.MPLPPHPGHPGYINFS[+79.966]YEVLTPLKWYQSM[+15.995]IRHPYP.S		M[+16], S[+80]	852.816	5	4260.05	4259.04	1	1.1	17	Non	776.18	776.18	9.39	12.54	1703	>sp|P02817|AMELX_BOVIN Amelogenin, X isoform OS=Bos taurus OX=9913 GN=AMELX PE=1 SV=2	1	hf1_10472_ebo_30_1_261219.ScanId;v=1;d1=24034.24034.5	controllerType=0 controllerNumber=1 scan=24034	49.8013
35596:4	1	S.M[+15.995]PLPPHPGHPGYINFS[+79.966]YEVLTPLKWYQSMIRHPYP.S		M[+16], S[+80]	1065.77	4	4260.07	4259.04	1	5.6	17	Non	857.77	857.77	19.82	14.71	1703	>sp|P02817|AMELX_BOVIN Amelogenin, X isoform OS=Bos taurus OX=9913 GN=AMELX PE=1 SV=2	1	hf1_10472_ebo_30_1_261219.ScanId;v=1;d1=26449.26449.4	controllerType=0 controllerNumber=1 scan=26449	54.2275
29483:4	1	S.M[+15.995]PLPPHPGHPGYINFSYEVLTPLKWYQSM[+15.995]IRHPYP.S		M[+16]*2	1049.78	4	4196.08	4195.07	1	1.9	17	Non	875.52	875.52	11.69	14.01	1703	>sp|P02817|AMELX_BOVIN Amelogenin, X isoform OS=Bos taurus OX=9913 GN=AMELX PE=1 SV=2	1	hf1_10472_ebo_30_1_261219.ScanId;v=1;d1=22357.22357.4	controllerType=0 controllerNumber=1 scan=22357	46.7552
30887:4	1	S.MPLPPHPGHPGYINFS[+79.966]YEVLTPLKWYQSM[+15.995]IRHPYP.S		M[+16], S[+80]	1065.52	4	4259.07	4259.04	0	5.7	17	Non	903.33	903.33	60.47	15.71	1703	>sp|P02817|AMELX_BOVIN Amelogenin, X isoform OS=Bos taurus OX=9913 GN=AMELX PE=1 SV=2	1	hf1_10472_ebo_30_1_261219.ScanId;v=1;d1=23283.23283.4	controllerType=0 controllerNumber=1 scan=23283	48.429
34185:4	1	S.M[+15.995]PLPPHPGHPGYINFS[+79.966]YEVLTPLKWYQSMIRHPYP.S		M[+16], S[+80]	1065.52	4	4259.07	4259.04	0	7.1	17	Non	988.36	988.36	28.44	16.65	1703	>sp|P02817|AMELX_BOVIN Amelogenin, X isoform OS=Bos taurus OX=9913 GN=AMELX PE=1 SV=2	1	hf1_10472_ebo_30_1_261219.ScanId;v=1;d1=25522.25522.4	controllerType=0 controllerNumber=1 scan=25522	52.5063
30592:4	1	S.MPLPPHPGHPGYINFS[+79.966]YEVLTPLKWYQSM[+15.995]IRHPYP.S		M[+16], S[+80]	1065.52	4	4259.07	4259.04	0	5.6	17	Non	990.92	990.92	58.64	16.71	1703	>sp|P02817|AMELX_BOVIN Amelogenin, X isoform OS=Bos taurus OX=9913 GN=AMELX PE=1 SV=2	1	hf1_10472_ebo_30_1_261219.ScanId;v=1;d1=23084.23084.4	controllerType=0 controllerNumber=1 scan=23084	48.0723
28589:4	1	S.M[+15.995]PLPPHPGHPGYINFSYEVLTPLKWYQSM[+15.995]IRHPYP.S		M[+16]*2	1049.53	4	4195.11	4195.07	0	8.5	17	Non	998.57	998.57	10.99	16.3	1703	>sp|P02817|AMELX_BOVIN Amelogenin, X isoform OS=Bos taurus OX=9913 GN=AMELX PE=1 SV=2	1	hf1_10472_ebo_30_1_261219.ScanId;v=1;d1=21786.21786.4	controllerType=0 controllerNumber=1 scan=21786	45.6992
31997:4	1	S.MPLPPHPGHPGYINFS[+79.966]YEVLTPLKWYQSM[+15.995]IRHPYP.S		M[+16], S[+80]	1065.77	4	4260.05	4259.04	1	1.8	17	Non	1033.4	1033.4	49.49	17.01	1703	>sp|P02817|AMELX_BOVIN Amelogenin, X isoform OS=Bos taurus OX=9913 GN=AMELX PE=1 SV=2	1	hf1_10472_ebo_30_1_261219.ScanId;v=1;d1=24045.24045.4	controllerType=0 controllerNumber=1 scan=24045	49.8204
50346:5	1	S.MP[+15.995]LPPHPGHPGYINFS[+79.966]YEVLTPLKWY[+15.995]QSMIRHPYP.S		P[+16], S[+80], Y[+16]	855.815	5	4275.04	4275.04	0	1.5	17	Non	4.22	4.22	0	2.56	1703	>sp|P02817|AMELX_BOVIN Amelogenin, X isoform OS=Bos taurus OX=9913 GN=AMELX PE=1 SV=2	1	hf1_10472_ebo_30_1_261219.ScanId;v=1;d1=36838.36838.5	controllerType=0 controllerNumber=1 scan=36838	75.669
35263:6	1	S.MPLP[+31.990]P[+15.995]HPGHP[+31.990]GYINFSYEVLTPLKWYQSMIRHPYP.S		P[+16][+32]*2	708.019	6	4243.08	4243.06	0	5.1	17	Non	10.16	10.16	0	1.33	1703	>sp|P02817|AMELX_BOVIN Amelogenin, X isoform OS=Bos taurus OX=9913 GN=AMELX PE=1 SV=2	1	hf1_10472_ebo_30_1_261219.ScanId;v=1;d1=26228.26228.6	controllerType=0 controllerNumber=1 scan=26228	53.8163
43806:5	1	S.MP[+15.995]LPPHPGHPGYINFS[+79.966]YEVLTPLKWYQSMIRH[+15.995]PYP.S		H[+16], P[+16], S[+80]	855.818	5	4275.06	4275.04	0	5.1	17	Non	15.1	15.1	0.4	1.49	1703	>sp|P02817|AMELX_BOVIN Amelogenin, X isoform OS=Bos taurus OX=9913 GN=AMELX PE=1 SV=2	1	hf1_10472_ebo_30_1_261219.ScanId;v=1;d1=31690.31690.5	controllerType=0 controllerNumber=1 scan=31690	63.612
46518:5	1	S.MP[+15.995]LPPHPGHPGYINFS[+79.966]YEVLTPLKWY[+15.995]QSMIRHPYP.S		P[+16], S[+80], Y[+16]	855.816	5	4275.05	4275.04	0	3	17	Non	20.72	20.72	0	2.26	1703	>sp|P02817|AMELX_BOVIN Amelogenin, X isoform OS=Bos taurus OX=9913 GN=AMELX PE=1 SV=2	1	hf1_10472_ebo_30_1_261219.ScanId;v=1;d1=33723.33723.5	controllerType=0 controllerNumber=1 scan=33723	67.7794
50322:5	1	S.MP[+15.995]LPPHPGHPGYINFS[+79.966]YEVLTPLKW[+15.995]YQSMIRHPYP.S		P[+16], S[+80], W[+16]	856.018	5	4276.06	4275.04	1	4	17	Non	34.28	34.28	0	2.52	1703	>sp|P02817|AMELX_BOVIN Amelogenin, X isoform OS=Bos taurus OX=9913 GN=AMELX PE=1 SV=2	1	hf1_10472_ebo_30_1_261219.ScanId;v=1;d1=36718.36718.5	controllerType=0 controllerNumber=1 scan=36718	74.9868
41087:5	1	S.MP[+15.995]LPPHPGHPGYINFS[+79.966]YEVLTPLKWY[+15.995]QSMIRHPYP.S		P[+16], S[+80], Y[+16]	855.82	5	4275.07	4275.04	0	7.3	17	Non	52.36	52.36	0	1.75	1703	>sp|P02817|AMELX_BOVIN Amelogenin, X isoform OS=Bos taurus OX=9913 GN=AMELX PE=1 SV=2	1	hf1_10472_ebo_30_1_261219.ScanId;v=1;d1=29976.29976.5	controllerType=0 controllerNumber=1 scan=29976	60.5595
48712:5	1	S.M[+15.995]PLPPHPGHPGYINFS[+79.966]YEVLTPLKWYQSM[+15.995]IRHPYP.S		M[+16]*2, S[+80]	855.818	5	4275.06	4275.04	0	4.9	17	Non	53.1	53.1	0	2.55	1703	>sp|P02817|AMELX_BOVIN Amelogenin, X isoform OS=Bos taurus OX=9913 GN=AMELX PE=1 SV=2	1	hf1_10472_ebo_30_1_261219.ScanId;v=1;d1=35343.35343.5	controllerType=0 controllerNumber=1 scan=35343	71.2478
36076:6	1	S.MP[+15.995]LPPHPGHPGYINFS[+79.966]YEVLTPLKWYQ[+0.984]SMIRHPYP.S		P[+16], Q[+1], S[+80]	710.849	6	4260.06	4260.03	0	6.8	17	Non	65.15	65.15	0	2.75	1703	>sp|P02817|AMELX_BOVIN Amelogenin, X isoform OS=Bos taurus OX=9913 GN=AMELX PE=1 SV=2	1	hf1_10472_ebo_30_1_261219.ScanId;v=1;d1=26765.26765.6	controllerType=0 controllerNumber=1 scan=26765	54.7964
42776:5	1	S.MP[+15.995]LPPHPGHPGYINFS[+79.966]YEVLTPLKWY[+15.995]QSMIRHPYP.S		P[+16], S[+80], Y[+16]	855.818	5	4275.06	4275.04	0	5.5	17	Non	72.54	72.54	0	2.55	1703	>sp|P02817|AMELX_BOVIN Amelogenin, X isoform OS=Bos taurus OX=9913 GN=AMELX PE=1 SV=2	1	hf1_10472_ebo_30_1_261219.ScanId;v=1;d1=31060.31060.4	controllerType=0 controllerNumber=1 scan=31060	62.4884
29155:6	1	S.MP[+15.995]LPPHPGHPGYINFS[+79.966]YEVLTPLKWYQSMIRHP[+15.995]YP.S		P[+16]*2, S[+80]	713.184	6	4274.07	4275.04	-1	7.8	17	Non	75.45	75.45	0.4	1.34	1703	>sp|P02817|AMELX_BOVIN Amelogenin, X isoform OS=Bos taurus OX=9913 GN=AMELX PE=1 SV=2	1	hf1_10472_ebo_30_1_261219.ScanId;v=1;d1=22141.22141.6	controllerType=0 controllerNumber=1 scan=22141	46.3549
29917:7	1	S.MP[+15.995]LPPHPGHPGYINFS[+79.966]YEVLTPLKWYQSMIRH[+15.995]PYP.S		H[+16], P[+16], S[+80]	611.586	7	4275.06	4275.04	0	5	17	Non	78.1	78.1	0.4	2.26	1703	>sp|P02817|AMELX_BOVIN Amelogenin, X isoform OS=Bos taurus OX=9913 GN=AMELX PE=1 SV=2	1	hf1_10472_ebo_30_1_261219.ScanId;v=1;d1=22641.22641.7	controllerType=0 controllerNumber=1 scan=22641	47.2653
47160:5	1	S.MP[+15.995]LPPHPGHPGYINFS[+79.966]YEVLTP[+15.995]LKWYQSMIRHPYP.S		P[+16]*2, S[+80]	855.817	5	4275.06	4275.04	0	4.1	17	Non	85.57	85.57	3.9	2.67	1703	>sp|P02817|AMELX_BOVIN Amelogenin, X isoform OS=Bos taurus OX=9913 GN=AMELX PE=1 SV=2	1	hf1_10472_ebo_30_1_261219.ScanId;v=1;d1=34189.34189.5	controllerType=0 controllerNumber=1 scan=34189	68.8068
50308:5	1	S.MP[+15.995]LPPHPGHPGYINFS[+79.966]YEVLTP[+15.995]LKWYQSMIRHPYP.S		P[+16]*2, S[+80]	856.019	5	4276.07	4275.04	1	5.7	17	Non	91.67	91.67	4	3.16	1703	>sp|P02817|AMELX_BOVIN Amelogenin, X isoform OS=Bos taurus OX=9913 GN=AMELX PE=1 SV=2	1	hf1_10472_ebo_30_1_261219.ScanId;v=1;d1=36658.36658.5	controllerType=0 controllerNumber=1 scan=36658	74.6501
[truncated: 3,097 more rows]

## Sheet: Proteins
Protein Rank	Description	|Log Prob|	Best |Log Prob|	Best score	Total Intensity	# of spectra	# of unique peptides	# of mod peptides	Coverage %	# AA's in protein	Protein DB number
[truncated: 4 more rows]
