# Supplementary material for: A Peptidomics Method for Assessing Sex from Modern and Ancient Bovine Tooth Enamel.
Source: Research Square preprint supplement (doi:10.21203/rs.3.rs-3766361/v1), 2024-01-29
Supplement: Supplementary file 8 [file aeaf40a28a8ed7f6f35e10a1.xlsx]

## Sheet: Summary
Summary:
	1) Input data file: H:\Proteomics\Projects\Boaretto\INCPM_10472\Raw_files\HF1_10472_EBO_34_1_261219.raw
	2) Protein database: H:\Proteomics\Projects\Boaretto\INCPM_18273\AMELs Cattle fasta Pau 2.Fasta
	3) Parameter file: D:\Boaretto\HF1_10472_EBO_34_1_261219.raw_20230418_Amel\objs\params.prf
	4) Date/Time: April 18, 2023 8:02:07 PM IDT
	5) RunTime: 3 hours, 47 minutes, 49 seconds; on 34 cores
Summary Statistics:
	1) Reporting 2 forward and 2 reverse proteins
	2) 2743 unique forward peptides
	3) 6035 spectra matched to forward peptides
	4) Estimated spectrum-level FDR on true proteins is 3.3%
Recorded protein search configuration:
Num	Rule	Value
0	Protein database	H:\Proteomics\Projects\Boaretto\INCPM_18273\AMELs Cattle fasta Pau 2.Fasta
1	Spectrum-level FDR	Auto cut
2	Cleavage residues	KR
3	Digest cutter	C-terminal cutter
4	Peptide termini	Non specific
5	Maximum number of missed cleavages	Any missed cleavages (-1)
6	Precursor tolerance	10.0 ppm
7	Fragment tolerance	frag:qtof_hcd 20.0 ppm
8	Fragment tolerance version	2
9	Charges applied to charge-unassigned spectra:	1,2,3
10	Precursor mass max	7500.0
11	N-glycan search	None
12	O-glycan search	None
13	Off by x isotopes	-2,-1,0,+1,+2
14	Contaminants added	false
15	Decoys added	true
16	%Additional parameters:
17	Disulfide Enable	false
18	Trisulfide Enable	false
19	DSS Crosslink Enable	false
20	Custom Crosslink Enable	false
21	Wildcard Enable	0
22	Combyne cut off score	Auto
23	Protein FDR cutoff	1%
24	Focused DB created	true
25	Export mzIdentML	true
26	Score version	2
27	precursor_assignment_flags	2
28	po_NumberMonosReturn	2
29	Lock mass list	None
30	do_quick_rejects	0
31	%Modification searches:
32	common_modifications_max	2
33	rare_modifications_max	2
34	%Fixed and variable modifications:
35	Oxidation / +15.994915 @ F, H, K, M, P, W, Y | common2
36	Deamidated / +0.984016 @ N, Q, R | common2
37	Acetyl / +42.010565 @ Protein NTerm | rare1
38	Dioxidation / +31.989829 @ F, M, P, W, Y | rare2
39	Gln->pyro-Glu / -17.026549 @ Protein NTerm Q | rare1
40	Glu->pyro-Glu / -18.010565 @ Protein NTerm E | rare1
41	Phospho / +79.966331 @ S | rare1
42	% Custom modification text below
43	%Glycan modifications:
44	% Custom modification text below
45	Show all N-glycopeptides	0
46	%Addition parameters:
47	Product Version	PMI-Byonic-Com:v4.6.1
48	Registered to	david Morgenstern G-INCPM

## Sheet: Spectra
Query #:z	Protein Rank	Peptide < ProteinMetrics Confidential >	Glycans NHFAGNa	Modification Type(s)	Observed m/z	z	Observed (M+H)	Calc. mass (M+H)	Off-by-x error	Mass error (ppm)	Starting position	Cleavage	Score	Delta	Delta Mod	|Log Prob|	# of unique peptides	Protein Name	Protein DB number	Comment	Scan #	Scan Time
45056:4	1	-.[+42.011].MGTWILFACLLGAAFSMPLP[+15.995]PHP[+15.995]GHPGYINFS[+79.966]YEVLTPLKWYQSMI.R		.[42], P[+16]*2, S[+80]	1337.65	4	5347.58	5348.56	-1	5.6	1	Non	53.98	42.85	5.57	0.45	2376	>sp|P02817|AMELX_BOVIN Amelogenin, X isoform OS=Bos taurus OX=9913 GN=AMELX PE=1 SV=2	1	hf1_10472_ebo_34_1_261219.ScanId;v=1;d1=32466.32466.4	controllerType=0 controllerNumber=1 scan=32466	63.9195
35107:5	1	-.[+42.011].MGTWILF[+31.990]ACLLGAAFSMPLPPHPGHPGYIN[+0.984]FSYEVLTPLKWYQSM[+15.995]IRHPYP.S		.[42], F[+32], M[+16], N[+1]	1188.18	5	5936.87	5935.9	1	-4.9	1	Non	156.89	156.89	17.94	2.35	2376	>sp|P02817|AMELX_BOVIN Amelogenin, X isoform OS=Bos taurus OX=9913 GN=AMELX PE=1 SV=2	1	hf1_10472_ebo_34_1_261219.ScanId;v=1;d1=26002.26002.5	controllerType=0 controllerNumber=1 scan=26002	52.401
27337:6	1	M.[+42.011].GTWILFACLLGAAFSMPLPPHPGHPGYIN[+0.984]FSYEVLTPLK.W		.[42], N[+1]	717.372	6	4299.2	4298.19	1	1.4	2	NRagged	92.87	62.2	62.2	0.31	2376	>sp|P02817|AMELX_BOVIN Amelogenin, X isoform OS=Bos taurus OX=9913 GN=AMELX PE=1 SV=2	1	hf1_10472_ebo_34_1_261219.ScanId;v=1;d1=20800.20800.6	controllerType=0 controllerNumber=1 scan=20800	43.4006
36698:6	1	M.[+42.011].GTWILFACLLGAAFSMPLPPHPGHPGYINF[+15.995]SYEVLTPLKWYQSMIR.H		.[42], F[+16]	880.287	6	5276.69	5277.66	-1	6.3	2	NRagged	283.76	283.76	4.53	4.2	2376	>sp|P02817|AMELX_BOVIN Amelogenin, X isoform OS=Bos taurus OX=9913 GN=AMELX PE=1 SV=2	1	hf1_10472_ebo_34_1_261219.ScanId;v=1;d1=27083.27083.4	controllerType=0 controllerNumber=1 scan=27083	54.3157
39463:4	1	G.TW[+31.990]ILFACLLGAAFSMPLPPHPGHPGYINF[+15.995]SY[+15.995]EVLTPLKW[+31.990]YQSMI.R		F[+16], W[+32]*2, Y[+16]	1276.13	4	5101.51	5102.5	-1	3.7	3	Non	48.44	48.44	0	0.53	2376	>sp|P02817|AMELX_BOVIN Amelogenin, X isoform OS=Bos taurus OX=9913 GN=AMELX PE=1 SV=2	1	hf1_10472_ebo_34_1_261219.ScanId;v=1;d1=28890.28890.4	controllerType=0 controllerNumber=1 scan=28890	57.5525
36493:6	1	G.TW[+31.990]ILF[+15.995]ACLLGAAFSMPLPPHPGHP[+15.995]GYINFS[+79.966]YEVLTPLKWYQSMIR.H		F[+16], P[+16], S[+80], W[+32]	885.094	6	5305.53	5306.57	-1	-8.6	3	NRagged	351.94	351.94	7.65	4.28	2376	>sp|P02817|AMELX_BOVIN Amelogenin, X isoform OS=Bos taurus OX=9913 GN=AMELX PE=1 SV=2	1	hf1_10472_ebo_34_1_261219.ScanId;v=1;d1=26942.26942.4	controllerType=0 controllerNumber=1 scan=26942	54.0653
39071:6	1	G.TW[+31.990]ILFACLLGAAFSMPLPPHPGHPGYIN[+0.984]FS[+79.966]YEVLTPLKWYQSM[+15.995]IR.H		M[+16], N[+1], S[+80], W[+32]	882.932	6	5292.56	5291.56	1	-1.8	3	NRagged	499.64	499.64	16.63	7.01	2376	>sp|P02817|AMELX_BOVIN Amelogenin, X isoform OS=Bos taurus OX=9913 GN=AMELX PE=1 SV=2	1	hf1_10472_ebo_34_1_261219.ScanId;v=1;d1=28630.28630.3	controllerType=0 controllerNumber=1 scan=28630	57.089
22598:4	1	T.W[+31.990]ILFACLLGAAFSMPLPPHPGHPGYINF.S		W[+32]	775.394	4	3098.55	3098.54	0	3.4	4	Non	331.09	24.98	24.98	2.37	2376	>sp|P02817|AMELX_BOVIN Amelogenin, X isoform OS=Bos taurus OX=9913 GN=AMELX PE=1 SV=2	1	hf1_10472_ebo_34_1_261219.ScanId;v=1;d1=17635.17635.4	controllerType=0 controllerNumber=1 scan=17635	38.0754
21233:4	1	T.W[+15.995]ILF[+31.990]ACLLGAAFSMPLPPHPGHPGYINF.S		F[+32], W[+16]	779.391	4	3114.54	3114.54	0	1.3	4	Non	158.37	11.99	11.99	0.44	2376	>sp|P02817|AMELX_BOVIN Amelogenin, X isoform OS=Bos taurus OX=9913 GN=AMELX PE=1 SV=2	1	hf1_10472_ebo_34_1_261219.ScanId;v=1;d1=16701.16701.4	controllerType=0 controllerNumber=1 scan=16701	36.4884
19841:3	1	T.W[+15.995]ILF[+31.990]ACLLGAAFSMP[+15.995]LPPHPGHPGYINFS[+79.966].Y		F[+32], P[+16], S[+80], W[+16]	1099.85	3	3297.55	3297.53	0	5.4	4	Non	151.41	8.93	8.93	1.16	2376	>sp|P02817|AMELX_BOVIN Amelogenin, X isoform OS=Bos taurus OX=9913 GN=AMELX PE=1 SV=2	1	hf1_10472_ebo_34_1_261219.ScanId;v=1;d1=15718.15718.3	controllerType=0 controllerNumber=1 scan=15718	34.8076
28888:6	1	T.WILFACLLGAAFSMPLPPHPGHPGYIN[+0.984]FS[+79.966]YEVLTPLK.W		N[+1], S[+80]	697.018	6	4177.07	4178.07	-1	0.5	4	NRagged	127.62	1.75	1.75	0.28	2376	>sp|P02817|AMELX_BOVIN Amelogenin, X isoform OS=Bos taurus OX=9913 GN=AMELX PE=1 SV=2	1	hf1_10472_ebo_34_1_261219.ScanId;v=1;d1=21866.21866.6	controllerType=0 controllerNumber=1 scan=21866	45.2084
29044:6	1	T.WILFACLLGAAFSMPLPPHPGHPGY[+15.995]INFS[+79.966]YEVLTPLK.W		S[+80], Y[+16]	699.686	6	4193.08	4193.08	0	-1.4	4	NRagged	294.06	75.47	0.85	2.53	2376	>sp|P02817|AMELX_BOVIN Amelogenin, X isoform OS=Bos taurus OX=9913 GN=AMELX PE=1 SV=2	1	hf1_10472_ebo_34_1_261219.ScanId;v=1;d1=21971.21971.4	controllerType=0 controllerNumber=1 scan=21971	45.391
30327:6	1	T.WILFACLLGAAFSMPLPPHPGHPGYIN[+0.984]FS[+79.966]YEVLTPLK.W		N[+1], S[+80]	697.351	6	4179.07	4178.07	1	-1.2	4	NRagged	376.96	213.04	213.04	3.67	2376	>sp|P02817|AMELX_BOVIN Amelogenin, X isoform OS=Bos taurus OX=9913 GN=AMELX PE=1 SV=2	1	hf1_10472_ebo_34_1_261219.ScanId;v=1;d1=22823.22823.4	controllerType=0 controllerNumber=1 scan=22823	46.8625
27918:4	1	T.WILFACLLGAAFSM[+15.995]PLPPHPGHPGYINFS[+79.966]YEVLTPLK.W		M[+16], S[+80]	1049.03	4	4193.09	4193.08	0	1.6	4	NRagged	414.88	5	4.51	2.86	2376	>sp|P02817|AMELX_BOVIN Amelogenin, X isoform OS=Bos taurus OX=9913 GN=AMELX PE=1 SV=2	1	hf1_10472_ebo_34_1_261219.ScanId;v=1;d1=21205.21205.4	controllerType=0 controllerNumber=1 scan=21205	44.0848
29487:4	1	T.WILFACLLGAAFSMPLPPHPGHPGY[+15.995]INF[+31.990]SY[+31.990]EVLTPLK.W		F[+32], Y[+16][+32]	1045.04	4	4177.12	4177.1	0	5.5	4	NRagged	131.97	131.97	5.9	0.58	2376	>sp|P02817|AMELX_BOVIN Amelogenin, X isoform OS=Bos taurus OX=9913 GN=AMELX PE=1 SV=2	1	hf1_10472_ebo_34_1_261219.ScanId;v=1;d1=22266.22266.4	controllerType=0 controllerNumber=1 scan=22266	45.8948
37165:6	1	T.W[+31.990]ILF[+31.990]ACLLGAAFSMPLPPHPGH[+15.995]PGYINFSYEVLTPLKWYQSM.I		F[+32], H[+16], W[+32]	813.075	6	4873.41	4872.37	1	8.1	4	Non	62.16	62.16	0	0.75	2376	>sp|P02817|AMELX_BOVIN Amelogenin, X isoform OS=Bos taurus OX=9913 GN=AMELX PE=1 SV=2	1	hf1_10472_ebo_34_1_261219.ScanId;v=1;d1=27393.27393.4	controllerType=0 controllerNumber=1 scan=27393	54.8649
45000:4	1	T.WILFACLLGAAFS[+79.966]MPLPPHPGH[+15.995]PGYINF[+15.995]SYEVLTPLKWYQSM.I		F[+16], H[+16], S[+80]	1226.85	4	4904.38	4904.35	0	5.2	4	Non	86.55	86.55	0	0.62	2376	>sp|P02817|AMELX_BOVIN Amelogenin, X isoform OS=Bos taurus OX=9913 GN=AMELX PE=1 SV=2	1	hf1_10472_ebo_34_1_261219.ScanId;v=1;d1=32431.32431.4	controllerType=0 controllerNumber=1 scan=32431	63.8581
19247:3	1	W.ILFACLLGAAFSMPLPPHPGHPGYINF.S			960.827	3	2880.47	2880.47	0	-1.6	5	Non	52.15	52.15	52.15	0.79	2376	>sp|P02817|AMELX_BOVIN Amelogenin, X isoform OS=Bos taurus OX=9913 GN=AMELX PE=1 SV=2	1	hf1_10472_ebo_34_1_261219.ScanId;v=1;d1=15297.15297.3	controllerType=0 controllerNumber=1 scan=15297	34.0971
18972:3	1	W.ILFACLLGAAFSMPLPPHPGHPGYINF.S			960.827	3	2880.47	2880.47	0	-1.6	5	Non	99.07	99.07	99.07	0.93	2376	>sp|P02817|AMELX_BOVIN Amelogenin, X isoform OS=Bos taurus OX=9913 GN=AMELX PE=1 SV=2	1	hf1_10472_ebo_34_1_261219.ScanId;v=1;d1=15096.15096.3	controllerType=0 controllerNumber=1 scan=15096	33.7477
39516:6	1	W.ILFACLLGAAFSMPLPPHPGHPGYINFS[+79.966]YEVLTPLKWYQ[+0.984]SM[+15.995]IR.H		M[+16], Q[+1], S[+80]	829.573	6	4972.4	4972.45	0	-8.8	5	NRagged	406.8	406.8	35.58	5.55	2376	>sp|P02817|AMELX_BOVIN Amelogenin, X isoform OS=Bos taurus OX=9913 GN=AMELX PE=1 SV=2	1	hf1_10472_ebo_34_1_261219.ScanId;v=1;d1=28921.28921.3	controllerType=0 controllerNumber=1 scan=28921	57.6082
39701:5	1	W.ILFACLLGAAFSMP[+15.995]LPP[+31.990]HPGHPGYIN[+0.984]FSYEVLTPLKWYQSMIRHPYP.S		N[+1], P[+16][+32]	1084.75	5	5419.74	5418.7	1	6.3	5	Non	152.31	152.31	3.4	4.01	2376	>sp|P02817|AMELX_BOVIN Amelogenin, X isoform OS=Bos taurus OX=9913 GN=AMELX PE=1 SV=2	1	hf1_10472_ebo_34_1_261219.ScanId;v=1;d1=29040.29040.4	controllerType=0 controllerNumber=1 scan=29040	57.8202
43477:5	1	W.ILF[+15.995]ACLLGAAFSMPLPPHPGHPGYIN[+0.984]FS[+79.966]YEVLTPLKWYQSMIRHPYP.S		F[+16], N[+1], S[+80]	1094.34	5	5467.68	5466.67	1	0.9	5	Non	209.49	98.24	7.79	2.99	2376	>sp|P02817|AMELX_BOVIN Amelogenin, X isoform OS=Bos taurus OX=9913 GN=AMELX PE=1 SV=2	1	hf1_10472_ebo_34_1_261219.ScanId;v=1;d1=31466.31466.3	controllerType=0 controllerNumber=1 scan=31466	62.1379
37867:6	1	I.LFACLLGAAFSMPLPPHPGHPGYINFSY[+15.995]EVLTPLKWYQSMIR.H		Y[+16]	797.246	6	4778.44	4778.41	0	5.8	6	NRagged	147.32	147.32	0	2.98	2376	>sp|P02817|AMELX_BOVIN Amelogenin, X isoform OS=Bos taurus OX=9913 GN=AMELX PE=1 SV=2	1	hf1_10472_ebo_34_1_261219.ScanId;v=1;d1=27853.27853.6	controllerType=0 controllerNumber=1 scan=27853	55.6914
43777:6	1	I.LFACLLGAAFSMPLPPHPGH[+15.995]PGYINFSYEVLTPLKWYQSMIRHPYP.S		H[+16]	879.444	6	5271.63	5272.64	-1	-1.7	6	Non	26.51	26.51	6.71	0.96	2376	>sp|P02817|AMELX_BOVIN Amelogenin, X isoform OS=Bos taurus OX=9913 GN=AMELX PE=1 SV=2	1	hf1_10472_ebo_34_1_261219.ScanId;v=1;d1=31663.31663.3	controllerType=0 controllerNumber=1 scan=31663	62.4882
44552:6	1	I.LF[+15.995]ACLLGAAFSMPLPPHPGHPGYINFSYEVLTPLKWYQSMIRHPYP.S		F[+16]	879.442	6	5271.62	5272.64	-1	-3.4	6	Non	279.6	279.6	16.03	5.07	2376	>sp|P02817|AMELX_BOVIN Amelogenin, X isoform OS=Bos taurus OX=9913 GN=AMELX PE=1 SV=2	1	hf1_10472_ebo_34_1_261219.ScanId;v=1;d1=32148.32148.3	controllerType=0 controllerNumber=1 scan=32148	63.3521
37653:6	1	I.LFACLLGAAFSMPLPPHPGHPGYINF[+31.990]SYEVLTPLKWYQSM[+15.995]IRHPYP.S		F[+32], M[+16]	884.95	6	5304.66	5304.63	0	6.4	6	Non	81.48	81.48	0	2.43	2376	>sp|P02817|AMELX_BOVIN Amelogenin, X isoform OS=Bos taurus OX=9913 GN=AMELX PE=1 SV=2	1	hf1_10472_ebo_34_1_261219.ScanId;v=1;d1=27712.27712.3	controllerType=0 controllerNumber=1 scan=27712	55.4406
43211:6	1	L.FACLLGAAFSMP[+15.995]LPPHPGHPGYINFSYEVLTPLKWYQSMIRHPYP.S		P[+16]	860.596	6	5158.54	5159.56	-1	-2.7	7	Non	77.83	77.83	5.14	1.33	2376	>sp|P02817|AMELX_BOVIN Amelogenin, X isoform OS=Bos taurus OX=9913 GN=AMELX PE=1 SV=2	1	hf1_10472_ebo_34_1_261219.ScanId;v=1;d1=31293.31293.3	controllerType=0 controllerNumber=1 scan=31293	61.8306
41921:6	1	L.FACLLGAAFS[+79.966]MPLPPHPGHP[+31.990]GYINF[+15.995]SYEVLTPLKWYQSMIRHPYP.S		F[+16], P[+32], S[+80]	879.266	6	5270.56	5271.51	-1	9.9	7	Non	83.42	83.42	0	1.39	2376	>sp|P02817|AMELX_BOVIN Amelogenin, X isoform OS=Bos taurus OX=9913 GN=AMELX PE=1 SV=2	1	hf1_10472_ebo_34_1_261219.ScanId;v=1;d1=30465.30465.3	controllerType=0 controllerNumber=1 scan=30465	60.3565
38650:4	1	L.FACLLGAAFSMPLPPHPGHPGYIN[+0.984]F[+31.990]SYEVLTPLKWYQ[+0.984]SMIRHPYP.S		F[+32], N[+1], Q[+1]	1295.37	4	5178.47	5177.52	1	-10.1	7	Non	374.46	317.92	36.09	4.4	2376	>sp|P02817|AMELX_BOVIN Amelogenin, X isoform OS=Bos taurus OX=9913 GN=AMELX PE=1 SV=2	1	hf1_10472_ebo_34_1_261219.ScanId;v=1;d1=28359.28359.2	controllerType=0 controllerNumber=1 scan=28359	56.6044
48718:3	1	F.ACLLGAAFSMPLPPHPGHPGYINF.S			836.422	3	2507.25	2507.24	0	6.2	8	Non	8.2	8.2	8.2	0.42	2376	>sp|P02817|AMELX_BOVIN Amelogenin, X isoform OS=Bos taurus OX=9913 GN=AMELX PE=1 SV=2	1	hf1_10472_ebo_34_1_261219.ScanId;v=1;d1=35522.35522.3	controllerType=0 controllerNumber=1 scan=35522	70.7979
47900:3	1	F.ACLLGAAFSMPLPPHPGHPGYINF.S			836.424	3	2507.26	2507.24	0	7.9	8	Non	8.34	8.34	8.34	0.44	2376	>sp|P02817|AMELX_BOVIN Amelogenin, X isoform OS=Bos taurus OX=9913 GN=AMELX PE=1 SV=2	1	hf1_10472_ebo_34_1_261219.ScanId;v=1;d1=34811.34811.6	controllerType=0 controllerNumber=1 scan=34811	69.1121
46585:3	1	F.ACLLGAAFSMPLPPHPGHPGYINF.S			836.422	3	2507.25	2507.24	0	6.5	8	Non	19.41	19.41	19.41	0.44	2376	>sp|P02817|AMELX_BOVIN Amelogenin, X isoform OS=Bos taurus OX=9913 GN=AMELX PE=1 SV=2	1	hf1_10472_ebo_34_1_261219.ScanId;v=1;d1=33667.33667.3	controllerType=0 controllerNumber=1 scan=33667	66.4312
47095:3	1	F.ACLLGAAFSMPLPPHPGHPGYINF.S			836.421	3	2507.25	2507.24	0	5.2	8	Non	40.12	40.12	40.12	0.54	2376	>sp|P02817|AMELX_BOVIN Amelogenin, X isoform OS=Bos taurus OX=9913 GN=AMELX PE=1 SV=2	1	hf1_10472_ebo_34_1_261219.ScanId;v=1;d1=34112.34112.3	controllerType=0 controllerNumber=1 scan=34112	67.4743
46309:3	1	F.ACLLGAAFSMPLPPHPGHPGYINF.S			836.422	3	2507.25	2507.24	0	6	8	Non	64.41	64.41	64.41	2.09	2376	>sp|P02817|AMELX_BOVIN Amelogenin, X isoform OS=Bos taurus OX=9913 GN=AMELX PE=1 SV=2	1	hf1_10472_ebo_34_1_261219.ScanId;v=1;d1=33398.33398.3	controllerType=0 controllerNumber=1 scan=33398	65.7374
48551:3	1	F.ACLLGAAFSMPLPPHPGHPGYINF.S			836.423	3	2507.25	2507.24	0	6.6	8	Non	73.31	53.82	53.82	1.07	2376	>sp|P02817|AMELX_BOVIN Amelogenin, X isoform OS=Bos taurus OX=9913 GN=AMELX PE=1 SV=2	1	hf1_10472_ebo_34_1_261219.ScanId;v=1;d1=35374.35374.3	controllerType=0 controllerNumber=1 scan=35374	70.4448
48184:3	1	F.ACLLGAAFSMPLPPHPGHPGYINF.S			836.422	3	2507.25	2507.24	0	5.7	8	Non	76.78	76.78	76.78	2.32	2376	>sp|P02817|AMELX_BOVIN Amelogenin, X isoform OS=Bos taurus OX=9913 GN=AMELX PE=1 SV=2	1	hf1_10472_ebo_34_1_261219.ScanId;v=1;d1=35072.35072.3	controllerType=0 controllerNumber=1 scan=35072	69.7633
49047:3	1	F.ACLLGAAFSMPLPPHPGHPGYINF.S			836.423	3	2507.26	2507.24	0	7.7	8	Non	77.29	77.29	77.29	1.13	2376	>sp|P02817|AMELX_BOVIN Amelogenin, X isoform OS=Bos taurus OX=9913 GN=AMELX PE=1 SV=2	1	hf1_10472_ebo_34_1_261219.ScanId;v=1;d1=35814.35814.3	controllerType=0 controllerNumber=1 scan=35814	71.4926
48044:3	1	F.ACLLGAAFSMPLPPHPGHPGYINF.S			836.422	3	2507.25	2507.24	0	6.2	8	Non	91.83	91.83	91.83	1.1	2376	>sp|P02817|AMELX_BOVIN Amelogenin, X isoform OS=Bos taurus OX=9913 GN=AMELX PE=1 SV=2	1	hf1_10472_ebo_34_1_261219.ScanId;v=1;d1=34940.34940.3	controllerType=0 controllerNumber=1 scan=34940	69.4218
47583:3	1	F.ACLLGAAFSMPLPPHPGHPGYINF.S			836.421	3	2507.25	2507.24	0	5.3	8	Non	92.37	92.37	92.37	1.1	2376	>sp|P02817|AMELX_BOVIN Amelogenin, X isoform OS=Bos taurus OX=9913 GN=AMELX PE=1 SV=2	1	hf1_10472_ebo_34_1_261219.ScanId;v=1;d1=34543.34543.3	controllerType=0 controllerNumber=1 scan=34543	68.5029
47258:3	1	F.ACLLGAAFSMPLPPHPGHPGYINF.S			836.422	3	2507.25	2507.24	0	5.7	8	Non	96.64	96.64	96.64	2.32	2376	>sp|P02817|AMELX_BOVIN Amelogenin, X isoform OS=Bos taurus OX=9913 GN=AMELX PE=1 SV=2	1	hf1_10472_ebo_34_1_261219.ScanId;v=1;d1=34256.34256.3	controllerType=0 controllerNumber=1 scan=34256	67.8133
47405:3	1	F.ACLLGAAFSMPLPPHPGHPGYINF.S			836.423	3	2507.25	2507.24	0	7	8	Non	99.77	99.77	99.77	1.13	2376	>sp|P02817|AMELX_BOVIN Amelogenin, X isoform OS=Bos taurus OX=9913 GN=AMELX PE=1 SV=2	1	hf1_10472_ebo_34_1_261219.ScanId;v=1;d1=34391.34391.3	controllerType=0 controllerNumber=1 scan=34391	68.159
46949:3	1	F.ACLLGAAFSMPLPPHPGHPGYINF.S			836.42	3	2507.25	2507.24	0	4.1	8	Non	115.45	115.45	115.45	0.98	2376	>sp|P02817|AMELX_BOVIN Amelogenin, X isoform OS=Bos taurus OX=9913 GN=AMELX PE=1 SV=2	1	hf1_10472_ebo_34_1_261219.ScanId;v=1;d1=33975.33975.3	controllerType=0 controllerNumber=1 scan=33975	67.1268
34704:6	1	F.ACLLGAAF[+15.995]SMPLPPHPGHPGYINFSYEVLTPLKWYQSM[+15.995]IR.H		F[+16], M[+16]	756.388	6	4533.29	4534.25	-1	8.7	8	NRagged	139.73	139.73	5.98	1.18	2376	>sp|P02817|AMELX_BOVIN Amelogenin, X isoform OS=Bos taurus OX=9913 GN=AMELX PE=1 SV=2	1	hf1_10472_ebo_34_1_261219.ScanId;v=1;d1=25742.25742.6	controllerType=0 controllerNumber=1 scan=25742	51.936
35091:6	1	F.ACLLGAAFS[+79.966]MPLPPHPGHPGYINFSY[+31.990]EVLTPLKWYQSM[+15.995]IR.H		M[+16], S[+80], Y[+32]	772.548	6	4630.25	4630.22	0	7.7	8	NRagged	223.91	223.91	3.36	3.46	2376	>sp|P02817|AMELX_BOVIN Amelogenin, X isoform OS=Bos taurus OX=9913 GN=AMELX PE=1 SV=2	1	hf1_10472_ebo_34_1_261219.ScanId;v=1;d1=25990.25990.5	controllerType=0 controllerNumber=1 scan=25990	52.3777
37008:5	1	A.CLLGAAF[+15.995]SMPLPPHPGHPGY[+15.995]INF[+31.990]SY[+31.990]EVLTPLKWYQSMIRHPYP.S		F[+16][+32], Y[+16][+32]	1004.89	5	5020.43	5021.43	-1	2.3	9	Non	89.57	89.57	1.1	1.22	2376	>sp|P02817|AMELX_BOVIN Amelogenin, X isoform OS=Bos taurus OX=9913 GN=AMELX PE=1 SV=2	1	hf1_10472_ebo_34_1_261219.ScanId;v=1;d1=27292.27292.4	controllerType=0 controllerNumber=1 scan=27292	54.6873
16610:2	1	L.LGAAFSMP[+31.990]LPPHPGHPGYIN[+0.984].F		N[+1], P[+32]	1053.51	2	2106.02	2106.01	0	3.7	11	Non	7.64	7.64	7.64	0.29	2376	>sp|P02817|AMELX_BOVIN Amelogenin, X isoform OS=Bos taurus OX=9913 GN=AMELX PE=1 SV=2	1	hf1_10472_ebo_34_1_261219.ScanId;v=1;d1=13434.13434.2	controllerType=0 controllerNumber=1 scan=13434	30.9338
33822:6	1	G.AAFS[+79.966]MPLPPHPGHPGYINF[+15.995]SYEVLTPLKWYQSM[+15.995]IRH.P		F[+16], M[+16], S[+80]	716.345	6	4293.03	4294.04	-1	-1.9	13	Non	112.35	112.35	5.52	1.26	2376	>sp|P02817|AMELX_BOVIN Amelogenin, X isoform OS=Bos taurus OX=9913 GN=AMELX PE=1 SV=2	1	hf1_10472_ebo_34_1_261219.ScanId;v=1;d1=25155.25155.3	controllerType=0 controllerNumber=1 scan=25155	50.899
35781:5	1	A.AFSMPLP[+15.995]PHPGHPGYINF[+31.990]S[+79.966]Y[+15.995]EVLTPLKWYQSMIRHPYP.S		F[+32], P[+16], S[+80], Y[+16]	923.434	5	4613.14	4612.17	1	-6.2	14	Non	118.19	118.19	5.87	0.7	2376	>sp|P02817|AMELX_BOVIN Amelogenin, X isoform OS=Bos taurus OX=9913 GN=AMELX PE=1 SV=2	1	hf1_10472_ebo_34_1_261219.ScanId;v=1;d1=26464.26464.4	controllerType=0 controllerNumber=1 scan=26464	53.2221
17960:3	1	A.FSMPLPPHPGHPGYINF.S			636.644	3	1907.92	1907.93	0	-5	15	Non	72.22	72.22	72.22	0.32	2376	>sp|P02817|AMELX_BOVIN Amelogenin, X isoform OS=Bos taurus OX=9913 GN=AMELX PE=1 SV=2	1	hf1_10472_ebo_34_1_261219.ScanId;v=1;d1=14387.14387.3	controllerType=0 controllerNumber=1 scan=14387	32.5544
17923:3	1	A.FSMPLPPHPGHPGYINF.S			636.643	3	1907.92	1907.93	0	-5.5	15	Non	188.51	188.51	188.51	2.31	2376	>sp|P02817|AMELX_BOVIN Amelogenin, X isoform OS=Bos taurus OX=9913 GN=AMELX PE=1 SV=2	1	hf1_10472_ebo_34_1_261219.ScanId;v=1;d1=14358.14358.3	controllerType=0 controllerNumber=1 scan=14358	32.5057
08483:2	1	F.SM[+15.995]PLPPHPG.H		M[+16]	474.736	2	948.465	948.461	0	4.9	16	Non	139.82	139.82	139.82	0.71	2376	>sp|P02817|AMELX_BOVIN Amelogenin, X isoform OS=Bos taurus OX=9913 GN=AMELX PE=1 SV=2	1	hf1_10472_ebo_34_1_261219.ScanId;v=1;d1=7916.7916.2	controllerType=0 controllerNumber=1 scan=7916	21.5536
09283:2	1	F.SM[+15.995]PLPPHPG.H		M[+16]	474.736	2	948.465	948.461	0	4.5	16	Non	238.02	231.96	174.45	3.58	2376	>sp|P02817|AMELX_BOVIN Amelogenin, X isoform OS=Bos taurus OX=9913 GN=AMELX PE=1 SV=2	1	hf1_10472_ebo_34_1_261219.ScanId;v=1;d1=8470.8470.2	controllerType=0 controllerNumber=1 scan=8470	22.4931
08655:2	1	F.SM[+15.995]PLPPHPG.H		M[+16]	474.736	2	948.465	948.461	0	4	16	Non	239.53	217.47	150.79	3.38	2376	>sp|P02817|AMELX_BOVIN Amelogenin, X isoform OS=Bos taurus OX=9913 GN=AMELX PE=1 SV=2	1	hf1_10472_ebo_34_1_261219.ScanId;v=1;d1=8029.8029.2	controllerType=0 controllerNumber=1 scan=8029	21.7439
18660:3	1	F.SMPLPPHPGHPGYINF.S			587.629	3	1760.87	1760.86	0	7.9	16	Non	116.5	50.48	50.48	0.51	2376	>sp|P02817|AMELX_BOVIN Amelogenin, X isoform OS=Bos taurus OX=9913 GN=AMELX PE=1 SV=2	1	hf1_10472_ebo_34_1_261219.ScanId;v=1;d1=14873.14873.2	controllerType=0 controllerNumber=1 scan=14873	33.3694
18074:3	1	F.SMPLPPHPGHPGYINF.S			587.626	3	1760.86	1760.86	0	3.5	16	Non	147.24	81.87	81.87	0.81	2376	>sp|P02817|AMELX_BOVIN Amelogenin, X isoform OS=Bos taurus OX=9913 GN=AMELX PE=1 SV=2	1	hf1_10472_ebo_34_1_261219.ScanId;v=1;d1=14469.14469.3	controllerType=0 controllerNumber=1 scan=14469	32.6868
18883:3	1	F.SMPLPPHPGHPGYINF.S			587.628	3	1760.87	1760.86	0	6.6	16	Non	184.23	99.39	99.39	1.06	2376	>sp|P02817|AMELX_BOVIN Amelogenin, X isoform OS=Bos taurus OX=9913 GN=AMELX PE=1 SV=2	1	hf1_10472_ebo_34_1_261219.ScanId;v=1;d1=15034.15034.3	controllerType=0 controllerNumber=1 scan=15034	33.6462
19767:3	1	F.SM[+15.995]PLPPHPGHPGYINF.S		M[+16]	592.96	3	1776.86	1776.85	0	6.3	16	Non	203.91	33.36	33.36	0.62	2376	>sp|P02817|AMELX_BOVIN Amelogenin, X isoform OS=Bos taurus OX=9913 GN=AMELX PE=1 SV=2	1	hf1_10472_ebo_34_1_261219.ScanId;v=1;d1=15663.15663.3	controllerType=0 controllerNumber=1 scan=15663	34.715
19481:3	1	F.SM[+15.995]PLPPHPGHPGYINF.S		M[+16]	592.958	3	1776.86	1776.85	0	4.2	16	Non	219.62	15.6	15.6	1.07	2376	>sp|P02817|AMELX_BOVIN Amelogenin, X isoform OS=Bos taurus OX=9913 GN=AMELX PE=1 SV=2	1	hf1_10472_ebo_34_1_261219.ScanId;v=1;d1=15455.15455.3	controllerType=0 controllerNumber=1 scan=15455	34.3675
31192:4	1	F.SMPLPPHPGHPGYINFSY[+15.995]EVLTPLK.W		Y[+16]	702.613	4	2807.43	2807.42	0	2.5	16	NRagged	67.76	67.76	2.89	0.52	2376	>sp|P02817|AMELX_BOVIN Amelogenin, X isoform OS=Bos taurus OX=9913 GN=AMELX PE=1 SV=2	1	hf1_10472_ebo_34_1_261219.ScanId;v=1;d1=23378.23378.4	controllerType=0 controllerNumber=1 scan=23378	47.8213
29742:3	1	F.SMPLPPHPGHPGYINFS[+79.966]YEVLTPLK.W		S[+80]	957.807	3	2871.41	2871.39	0	4.1	16	NRagged	409.13	409.13	143.52	7.19	2376	>sp|P02817|AMELX_BOVIN Amelogenin, X isoform OS=Bos taurus OX=9913 GN=AMELX PE=1 SV=2	1	hf1_10472_ebo_34_1_261219.ScanId;v=1;d1=22430.22430.3	controllerType=0 controllerNumber=1 scan=22430	46.1825
33419:3	1	F.SMPLPPHPGHPGYIN[+0.984]FS[+79.966]YEVLTPLK.W		N[+1], S[+80]	958.125	3	2872.36	2872.38	0	-6.1	16	NRagged	164.54	104.89	75.45	0.47	2376	>sp|P02817|AMELX_BOVIN Amelogenin, X isoform OS=Bos taurus OX=9913 GN=AMELX PE=1 SV=2	1	hf1_10472_ebo_34_1_261219.ScanId;v=1;d1=24886.24886.3	controllerType=0 controllerNumber=1 scan=24886	50.4288
28655:3	1	F.SM[+15.995]PLPPHPGHPGYINFS[+79.966]YEVLTPLK.W		M[+16], S[+80]	963.135	3	2887.39	2887.39	0	0.6	16	NRagged	186.27	186.27	21.25	2.53	2376	>sp|P02817|AMELX_BOVIN Amelogenin, X isoform OS=Bos taurus OX=9913 GN=AMELX PE=1 SV=2	1	hf1_10472_ebo_34_1_261219.ScanId;v=1;d1=21710.21710.3	controllerType=0 controllerNumber=1 scan=21710	44.9451
32563:3	1	F.SMPLPPHPGHPGYIN[+0.984]FS[+79.966]YEVLTPLK.W		N[+1], S[+80]	958.123	3	2872.35	2872.38	0	-8.2	16	NRagged	224.67	204.73	204.73	2.69	2376	>sp|P02817|AMELX_BOVIN Amelogenin, X isoform OS=Bos taurus OX=9913 GN=AMELX PE=1 SV=2	1	hf1_10472_ebo_34_1_261219.ScanId;v=1;d1=24289.24289.3	controllerType=0 controllerNumber=1 scan=24289	49.3877
33121:3	1	F.SMPLPPHPGHPGYIN[+0.984]FS[+79.966]YEVLTPLK.W		N[+1], S[+80]	958.123	3	2872.35	2872.38	0	-8.6	16	NRagged	251.78	189.81	189.81	3.42	2376	>sp|P02817|AMELX_BOVIN Amelogenin, X isoform OS=Bos taurus OX=9913 GN=AMELX PE=1 SV=2	1	hf1_10472_ebo_34_1_261219.ScanId;v=1;d1=24689.24689.3	controllerType=0 controllerNumber=1 scan=24689	50.0848
32847:3	1	F.SMPLPPHPGHPGYIN[+0.984]FS[+79.966]YEVLTPLK.W		N[+1], S[+80]	958.121	3	2872.35	2872.38	0	-9.8	16	NRagged	265.5	221.46	218.28	3.63	2376	>sp|P02817|AMELX_BOVIN Amelogenin, X isoform OS=Bos taurus OX=9913 GN=AMELX PE=1 SV=2	1	hf1_10472_ebo_34_1_261219.ScanId;v=1;d1=24493.24493.3	controllerType=0 controllerNumber=1 scan=24493	49.7428
27798:4	1	F.SM[+15.995]PLPPHPGHPGYINFS[+79.966]YEVLTPLK.W		M[+16], S[+80]	722.609	4	2887.41	2887.39	0	8.4	16	NRagged	348.23	348.23	53.93	5.19	2376	>sp|P02817|AMELX_BOVIN Amelogenin, X isoform OS=Bos taurus OX=9913 GN=AMELX PE=1 SV=2	1	hf1_10472_ebo_34_1_261219.ScanId;v=1;d1=21120.21120.4	controllerType=0 controllerNumber=1 scan=21120	43.9395
28247:3	1	F.SM[+15.995]PLPPHPGHPGYINFS[+79.966]YEVLTPLK.W		M[+16], S[+80]	963.136	3	2887.39	2887.39	0	1.6	16	NRagged	502.85	502.85	187.6	6.97	2376	>sp|P02817|AMELX_BOVIN Amelogenin, X isoform OS=Bos taurus OX=9913 GN=AMELX PE=1 SV=2	1	hf1_10472_ebo_34_1_261219.ScanId;v=1;d1=21436.21436.3	controllerType=0 controllerNumber=1 scan=21436	44.4777
27375:3	1	F.SM[+15.995]PLPPHPGHPGYINFS[+79.966]YEVLTPLK.W		M[+16], S[+80]	963.141	3	2887.41	2887.39	0	6.8	16	NRagged	619.84	619.84	155.17	10.47	2376	>sp|P02817|AMELX_BOVIN Amelogenin, X isoform OS=Bos taurus OX=9913 GN=AMELX PE=1 SV=2	1	hf1_10472_ebo_34_1_261219.ScanId;v=1;d1=20827.20827.3	controllerType=0 controllerNumber=1 scan=20827	43.4399
27852:3	1	F.SM[+15.995]PLPPHPGHPGYINFS[+79.966]YEVLTPLK.W		M[+16], S[+80]	963.139	3	2887.4	2887.39	0	4.4	16	NRagged	793.37	793.37	224.04	13.24	2376	>sp|P02817|AMELX_BOVIN Amelogenin, X isoform OS=Bos taurus OX=9913 GN=AMELX PE=1 SV=2	1	hf1_10472_ebo_34_1_261219.ScanId;v=1;d1=21155.21155.3	controllerType=0 controllerNumber=1 scan=21155	43.9998
29877:4	1	F.SMPLPPHPGHPGY[+15.995]IN[+0.984]F[+31.990]SYEVLTPLK.W		F[+32], N[+1], Y[+16]	710.857	4	2840.4	2840.4	0	2.9	16	NRagged	93.4	4.99	4.99	0.53	2376	>sp|P02817|AMELX_BOVIN Amelogenin, X isoform OS=Bos taurus OX=9913 GN=AMELX PE=1 SV=2	1	hf1_10472_ebo_34_1_261219.ScanId;v=1;d1=22520.22520.4	controllerType=0 controllerNumber=1 scan=22520	46.3385
28198:4	1	F.SMPLPPHPGHPGY[+31.990]IN[+0.984]F[+31.990]SYEVLTPLK.W		F[+32], N[+1], Y[+32]	714.855	4	2856.4	2856.39	0	2.5	16	NRagged	94.62	94.62	0	0.54	2376	>sp|P02817|AMELX_BOVIN Amelogenin, X isoform OS=Bos taurus OX=9913 GN=AMELX PE=1 SV=2	1	hf1_10472_ebo_34_1_261219.ScanId;v=1;d1=21401.21401.4	controllerType=0 controllerNumber=1 scan=21401	44.4194
28611:4	1	F.SMPLPPHP[+31.990]GHPGYIN[+0.984]F[+31.990]SYEVLTPLK.W		F[+32], N[+1], P[+32]	714.855	4	2856.4	2856.39	0	1.7	16	NRagged	96.01	96.01	1.29	0.54	2376	>sp|P02817|AMELX_BOVIN Amelogenin, X isoform OS=Bos taurus OX=9913 GN=AMELX PE=1 SV=2	1	hf1_10472_ebo_34_1_261219.ScanId;v=1;d1=21679.21679.4	controllerType=0 controllerNumber=1 scan=21679	44.8906
28486:3	1	F.SM[+15.995]PLPPHPGHPGYIN[+0.984]FS[+79.966]YEVLTPLK.W		M[+16], N[+1], S[+80]	963.47	3	2888.39	2888.37	0	7.5	16	NRagged	642.59	581.85	170.24	10.47	2376	>sp|P02817|AMELX_BOVIN Amelogenin, X isoform OS=Bos taurus OX=9913 GN=AMELX PE=1 SV=2	1	hf1_10472_ebo_34_1_261219.ScanId;v=1;d1=21591.21591.3	controllerType=0 controllerNumber=1 scan=21591	44.7381
33859:3	1	F.SM[+15.995]PLPPHPGHPGYINFS[+79.966]YEVLTPLKWY.Q		M[+16], S[+80]	1079.52	3	3236.55	3236.53	0	5.1	16	Non	429.35	429.35	145.88	7.48	2376	>sp|P02817|AMELX_BOVIN Amelogenin, X isoform OS=Bos taurus OX=9913 GN=AMELX PE=1 SV=2	1	hf1_10472_ebo_34_1_261219.ScanId;v=1;d1=25180.25180.3	controllerType=0 controllerNumber=1 scan=25180	50.9444
33866:4	1	F.SM[+15.995]PLPPHPGHP[+15.995]GY[+31.990]INF[+31.990]SYEVLTPLKWY.Q		F[+32], M[+16], P[+16], Y[+32]	809.893	4	3236.55	3236.54	0	2.6	16	Non	158.87	158.87	10.39	2.33	2376	>sp|P02817|AMELX_BOVIN Amelogenin, X isoform OS=Bos taurus OX=9913 GN=AMELX PE=1 SV=2	1	hf1_10472_ebo_34_1_261219.ScanId;v=1;d1=25187.25187.4	controllerType=0 controllerNumber=1 scan=25187	50.9575
40885:3	1	F.SMPLPPHPGH[+15.995]PGYINF[+15.995]SYEVLTPLKWYQ.S		F[+16], H[+16]	1100.89	3	3300.64	3300.62	0	7	16	Non	65.94	10.57	0	0.72	2376	>sp|P02817|AMELX_BOVIN Amelogenin, X isoform OS=Bos taurus OX=9913 GN=AMELX PE=1 SV=2	1	hf1_10472_ebo_34_1_261219.ScanId;v=1;d1=29797.29797.3	controllerType=0 controllerNumber=1 scan=29797	59.1693
32788:4	1	F.SM[+15.995]PLPPHPGHPGYINFS[+79.966]YEVLTPLKWYQSM[+15.995].I		M[+16]*2, S[+80]	900.425	4	3598.68	3598.66	0	5.5	16	Non	43.58	43.58	29.92	0.7	2376	>sp|P02817|AMELX_BOVIN Amelogenin, X isoform OS=Bos taurus OX=9913 GN=AMELX PE=1 SV=2	1	hf1_10472_ebo_34_1_261219.ScanId;v=1;d1=24450.24450.4	controllerType=0 controllerNumber=1 scan=24450	49.664
32285:5	1	F.SMP[+31.990]LPPHP[+15.995]GHPGYINFSY[+31.990]EVLTPLKWY[+15.995]QSMIRHPYP.S		P[+16][+32], Y[+16][+32]	870.026	5	4346.1	4346.08	0	3.5	16	Non	180	180	4	3.06	2376	>sp|P02817|AMELX_BOVIN Amelogenin, X isoform OS=Bos taurus OX=9913 GN=AMELX PE=1 SV=2	1	hf1_10472_ebo_34_1_261219.ScanId;v=1;d1=24103.24103.5	controllerType=0 controllerNumber=1 scan=24103	49.0653
06289:1	1	S.M[+15.995]PL.P		M[+16]	376.192	1	376.192	376.19	0	5.8	17	Non	177.37	3.92	3.92	0.41	2376	>sp|P02817|AMELX_BOVIN Amelogenin, X isoform OS=Bos taurus OX=9913 GN=AMELX PE=1 SV=2	1	hf1_10472_ebo_34_1_261219.ScanId;v=1;d1=6395.6395.2	controllerType=0 controllerNumber=1 scan=6395	19.0068
09737:1	1	S.M[+15.995]PLPP.H		M[+16]	570.299	1	570.299	570.296	0	5.9	17	Non	199.39	7.83	7.83	0.41	2376	>sp|P02817|AMELX_BOVIN Amelogenin, X isoform OS=Bos taurus OX=9913 GN=AMELX PE=1 SV=2	1	hf1_10472_ebo_34_1_261219.ScanId;v=1;d1=8787.8787.3	controllerType=0 controllerNumber=1 scan=8787	23.0382
05092:1	1	S.M[+15.995]PLPPH.P		M[+16]	707.357	1	707.357	707.355	0	3.6	17	Non	189.42	186.81	36.64	2.51	2376	>sp|P02817|AMELX_BOVIN Amelogenin, X isoform OS=Bos taurus OX=9913 GN=AMELX PE=1 SV=2	1	hf1_10472_ebo_34_1_261219.ScanId;v=1;d1=5540.5540.2	controllerType=0 controllerNumber=1 scan=5540	17.557
06108:1	1	S.M[+15.995]PLPPH.P		M[+16]	707.358	1	707.358	707.355	0	5.5	17	Non	286.52	255.14	45.61	4.3	2376	>sp|P02817|AMELX_BOVIN Amelogenin, X isoform OS=Bos taurus OX=9913 GN=AMELX PE=1 SV=2	1	hf1_10472_ebo_34_1_261219.ScanId;v=1;d1=6269.6269.2	controllerType=0 controllerNumber=1 scan=6269	18.7968
15322:2	1	S.MPLPPHP.G			394.712	2	788.416	788.412	0	4.9	17	Non	90.72	90.72	90.72	0.26	2376	>sp|P02817|AMELX_BOVIN Amelogenin, X isoform OS=Bos taurus OX=9913 GN=AMELX PE=1 SV=2	1	hf1_10472_ebo_34_1_261219.ScanId;v=1;d1=12554.12554.3	controllerType=0 controllerNumber=1 scan=12554	29.4746
49106:2	1	S.MPLPPHP.G			394.712	2	788.416	788.412	0	4.9	17	Non	143.3	143.3	143.3	1.08	2376	>sp|P02817|AMELX_BOVIN Amelogenin, X isoform OS=Bos taurus OX=9913 GN=AMELX PE=1 SV=2	1	hf1_10472_ebo_34_1_261219.ScanId;v=1;d1=35860.35860.2	controllerType=0 controllerNumber=1 scan=35860	71.5885
14725:2	1	S.MPLPPHP.G			394.712	2	788.416	788.412	0	4.2	17	Non	255.62	192.29	192.29	3.21	2376	>sp|P02817|AMELX_BOVIN Amelogenin, X isoform OS=Bos taurus OX=9913 GN=AMELX PE=1 SV=2	1	hf1_10472_ebo_34_1_261219.ScanId;v=1;d1=12147.12147.3	controllerType=0 controllerNumber=1 scan=12147	28.7964
14492:2	1	S.MPLPPHP.G			394.712	2	788.417	788.412	0	5.9	17	Non	266.84	135.16	135.16	2.4	2376	>sp|P02817|AMELX_BOVIN Amelogenin, X isoform OS=Bos taurus OX=9913 GN=AMELX PE=1 SV=2	1	hf1_10472_ebo_34_1_261219.ScanId;v=1;d1=11991.11991.3	controllerType=0 controllerNumber=1 scan=11991	28.537
16572:2	1	S.MPLPPHP.G			394.712	2	788.417	788.412	0	6	17	Non	321.79	150.64	150.64	3.47	2376	>sp|P02817|AMELX_BOVIN Amelogenin, X isoform OS=Bos taurus OX=9913 GN=AMELX PE=1 SV=2	1	hf1_10472_ebo_34_1_261219.ScanId;v=1;d1=13409.13409.2	controllerType=0 controllerNumber=1 scan=13409	30.895
15945:2	1	S.MPLPPHP.G			394.712	2	788.416	788.412	0	4.2	17	Non	400.3	188.11	188.11	4.13	2376	>sp|P02817|AMELX_BOVIN Amelogenin, X isoform OS=Bos taurus OX=9913 GN=AMELX PE=1 SV=2	1	hf1_10472_ebo_34_1_261219.ScanId;v=1;d1=12993.12993.2	controllerType=0 controllerNumber=1 scan=12993	30.1881
15250:2	1	S.MPLPPHP.G			394.712	2	788.416	788.412	0	4.4	17	Non	408.1	185.04	185.04	4.13	2376	>sp|P02817|AMELX_BOVIN Amelogenin, X isoform OS=Bos taurus OX=9913 GN=AMELX PE=1 SV=2	1	hf1_10472_ebo_34_1_261219.ScanId;v=1;d1=12506.12506.2	controllerType=0 controllerNumber=1 scan=12506	29.3971
14641:2	1	S.MPLPPHP.G			394.712	2	788.416	788.412	0	4.9	17	Non	422.3	223.55	223.55	4.33	2376	>sp|P02817|AMELX_BOVIN Amelogenin, X isoform OS=Bos taurus OX=9913 GN=AMELX PE=1 SV=2	1	hf1_10472_ebo_34_1_261219.ScanId;v=1;d1=12088.12088.2	controllerType=0 controllerNumber=1 scan=12088	28.701
14941:2	1	S.MPLPPHP.G			394.712	2	788.416	788.412	0	4.2	17	Non	440.56	233.49	233.49	4.21	2376	>sp|P02817|AMELX_BOVIN Amelogenin, X isoform OS=Bos taurus OX=9913 GN=AMELX PE=1 SV=2	1	hf1_10472_ebo_34_1_261219.ScanId;v=1;d1=12295.12295.2	controllerType=0 controllerNumber=1 scan=12295	29.0435
48377:2	1	S.M[+15.995]PLPPHP.G		M[+16]	402.709	2	804.41	804.407	0	3.3	17	Non	35.7	35.7	21.18	0.33	2376	>sp|P02817|AMELX_BOVIN Amelogenin, X isoform OS=Bos taurus OX=9913 GN=AMELX PE=1 SV=2	1	hf1_10472_ebo_34_1_261219.ScanId;v=1;d1=35237.35237.3	controllerType=0 controllerNumber=1 scan=35237	70.1557
47350:2	1	S.M[+15.995]PLPPHP.G		M[+16]	402.708	2	804.41	804.407	0	2.9	17	Non	60.59	60.59	25.83	0.48	2376	>sp|P02817|AMELX_BOVIN Amelogenin, X isoform OS=Bos taurus OX=9913 GN=AMELX PE=1 SV=2	1	hf1_10472_ebo_34_1_261219.ScanId;v=1;d1=34342.34342.2	controllerType=0 controllerNumber=1 scan=34342	68.0396
49575:2	1	S.M[+15.995]PLPPHP.G		M[+16]	402.709	2	804.41	804.407	0	3	17	Non	74.34	74.34	22.12	0.53	2376	>sp|P02817|AMELX_BOVIN Amelogenin, X isoform OS=Bos taurus OX=9913 GN=AMELX PE=1 SV=2	1	hf1_10472_ebo_34_1_261219.ScanId;v=1;d1=36291.36291.2	controllerType=0 controllerNumber=1 scan=36291	72.635
48758:2	1	S.M[+15.995]PLPPHP.G		M[+16]	402.708	2	804.409	804.407	0	1.8	17	Non	75.32	75.32	49.48	0.64	2376	>sp|P02817|AMELX_BOVIN Amelogenin, X isoform OS=Bos taurus OX=9913 GN=AMELX PE=1 SV=2	1	hf1_10472_ebo_34_1_261219.ScanId;v=1;d1=35556.35556.2	controllerType=0 controllerNumber=1 scan=35556	70.8742
48259:2	1	S.M[+15.995]PLPPHP.G		M[+16]	402.709	2	804.41	804.407	0	3.6	17	Non	81.63	81.63	16.69	0.89	2376	>sp|P02817|AMELX_BOVIN Amelogenin, X isoform OS=Bos taurus OX=9913 GN=AMELX PE=1 SV=2	1	hf1_10472_ebo_34_1_261219.ScanId;v=1;d1=35138.35138.2	controllerType=0 controllerNumber=1 scan=35138	69.9243
49298:2	1	S.M[+15.995]PLPPHP.G		M[+16]	402.708	2	804.409	804.407	0	2.5	17	Non	122.57	122.57	25.79	0.7	2376	>sp|P02817|AMELX_BOVIN Amelogenin, X isoform OS=Bos taurus OX=9913 GN=AMELX PE=1 SV=2	1	hf1_10472_ebo_34_1_261219.ScanId;v=1;d1=36034.36034.2	controllerType=0 controllerNumber=1 scan=36034	72.0199
47941:2	1	S.M[+15.995]PLPPHP.G		M[+16]	402.709	2	804.41	804.407	0	3.3	17	Non	122.66	104.96	51.3	0.89	2376	>sp|P02817|AMELX_BOVIN Amelogenin, X isoform OS=Bos taurus OX=9913 GN=AMELX PE=1 SV=2	1	hf1_10472_ebo_34_1_261219.ScanId;v=1;d1=34849.34849.3	controllerType=0 controllerNumber=1 scan=34849	69.1945
47952:2	1	S.M[+15.995]PLPPHP.G		M[+16]	402.709	2	804.41	804.407	0	3.1	17	Non	133.62	133.62	52.07	1.07	2376	>sp|P02817|AMELX_BOVIN Amelogenin, X isoform OS=Bos taurus OX=9913 GN=AMELX PE=1 SV=2	1	hf1_10472_ebo_34_1_261219.ScanId;v=1;d1=34858.34858.2	controllerType=0 controllerNumber=1 scan=34858	69.2164
10844:2	1	S.M[+31.990]PLPPHP.G		M[+32]	410.707	2	820.408	820.402	0	6.4	17	Non	192.26	81.65	9.42	1.09	2376	>sp|P02817|AMELX_BOVIN Amelogenin, X isoform OS=Bos taurus OX=9913 GN=AMELX PE=1 SV=2	1	hf1_10472_ebo_34_1_261219.ScanId;v=1;d1=9555.9555.2	controllerType=0 controllerNumber=1 scan=9555	24.3685
10274:1	1	S.M[+15.995]PLPPHP.G		M[+16]	804.41	1	804.41	804.407	0	4	17	Non	206.06	148.07	44.16	1.32	2376	>sp|P02817|AMELX_BOVIN Amelogenin, X isoform OS=Bos taurus OX=9913 GN=AMELX PE=1 SV=2	1	hf1_10472_ebo_34_1_261219.ScanId;v=1;d1=9154.9154.2	controllerType=0 controllerNumber=1 scan=9154	23.6598
10720:1	1	S.M[+15.995]PLPPHP.G		M[+16]	804.414	1	804.414	804.407	0	8.2	17	Non	208.98	156.97	26.14	2.46	2376	>sp|P02817|AMELX_BOVIN Amelogenin, X isoform OS=Bos taurus OX=9913 GN=AMELX PE=1 SV=2	1	hf1_10472_ebo_34_1_261219.ScanId;v=1;d1=9470.9470.2	controllerType=0 controllerNumber=1 scan=9470	24.2171
12389:2	1	S.M[+15.995]PLPPHP.G		M[+16]	402.709	2	804.411	804.407	0	5.2	17	Non	227.99	81.66	38.36	0.55	2376	>sp|P02817|AMELX_BOVIN Amelogenin, X isoform OS=Bos taurus OX=9913 GN=AMELX PE=1 SV=2	1	hf1_10472_ebo_34_1_261219.ScanId;v=1;d1=10599.10599.2	controllerType=0 controllerNumber=1 scan=10599	26.1493
12332:2	1	S.M[+15.995]PLPPHP.G		M[+16]	402.709	2	804.411	804.407	0	4.5	17	Non	234.26	96.79	25.83	0.89	2376	>sp|P02817|AMELX_BOVIN Amelogenin, X isoform OS=Bos taurus OX=9913 GN=AMELX PE=1 SV=2	1	hf1_10472_ebo_34_1_261219.ScanId;v=1;d1=10558.10558.3	controllerType=0 controllerNumber=1 scan=10558	26.0751
09955:1	1	S.M[+15.995]PLPPHP.G		M[+16]	804.412	1	804.412	804.407	0	5.5	17	Non	253.61	204.31	39.84	3.74	2376	>sp|P02817|AMELX_BOVIN Amelogenin, X isoform OS=Bos taurus OX=9913 GN=AMELX PE=1 SV=2	1	hf1_10472_ebo_34_1_261219.ScanId;v=1;d1=8931.8931.2	controllerType=0 controllerNumber=1 scan=8931	23.28
10373:1	1	S.M[+15.995]PLPPHP.G		M[+16]	804.411	1	804.411	804.407	0	4.5	17	Non	284.42	240.44	49.42	3.98	2376	>sp|P02817|AMELX_BOVIN Amelogenin, X isoform OS=Bos taurus OX=9913 GN=AMELX PE=1 SV=2	1	hf1_10472_ebo_34_1_261219.ScanId;v=1;d1=9216.9216.2	controllerType=0 controllerNumber=1 scan=9216	23.7629
09641:1	1	S.M[+15.995]PLPPHP.G		M[+16]	804.413	1	804.413	804.407	0	7.5	17	Non	284.99	235.42	45.6	4.21	2376	>sp|P02817|AMELX_BOVIN Amelogenin, X isoform OS=Bos taurus OX=9913 GN=AMELX PE=1 SV=2	1	hf1_10472_ebo_34_1_261219.ScanId;v=1;d1=8721.8721.2	controllerType=0 controllerNumber=1 scan=8721	22.9229
09247:1	1	S.M[+15.995]PLPPHP.G		M[+16]	804.411	1	804.411	804.407	0	5	17	Non	293.52	260.19	42.77	4.3	2376	>sp|P02817|AMELX_BOVIN Amelogenin, X isoform OS=Bos taurus OX=9913 GN=AMELX PE=1 SV=2	1	hf1_10472_ebo_34_1_261219.ScanId;v=1;d1=8446.8446.2	controllerType=0 controllerNumber=1 scan=8446	22.4503
10235:1	1	S.M[+15.995]PLPPHP.G		M[+16]	804.412	1	804.412	804.407	0	6.2	17	Non	295.93	233.89	32.12	4.16	2376	>sp|P02817|AMELX_BOVIN Amelogenin, X isoform OS=Bos taurus OX=9913 GN=AMELX PE=1 SV=2	1	hf1_10472_ebo_34_1_261219.ScanId;v=1;d1=9127.9127.2	controllerType=0 controllerNumber=1 scan=9127	23.6111
12695:2	1	S.M[+15.995]PLPPHP.G		M[+16]	402.709	2	804.411	804.407	0	4.8	17	Non	320.6	121.3	19.49	2.44	2376	>sp|P02817|AMELX_BOVIN Amelogenin, X isoform OS=Bos taurus OX=9913 GN=AMELX PE=1 SV=2	1	hf1_10472_ebo_34_1_261219.ScanId;v=1;d1=10804.10804.2	controllerType=0 controllerNumber=1 scan=10804	26.5036
08630:2	1	S.M[+15.995]PLPPHP.G		M[+16]	402.709	2	804.411	804.407	0	4.3	17	Non	378.17	195.81	87.73	3.87	2376	>sp|P02817|AMELX_BOVIN Amelogenin, X isoform OS=Bos taurus OX=9913 GN=AMELX PE=1 SV=2	1	hf1_10472_ebo_34_1_261219.ScanId;v=1;d1=8012.8012.2	controllerType=0 controllerNumber=1 scan=8012	21.7168
11855:2	1	S.M[+15.995]PLPPHP.G		M[+16]	402.71	2	804.412	804.407	0	6.1	17	Non	380.87	222.38	66.97	4.27	2376	>sp|P02817|AMELX_BOVIN Amelogenin, X isoform OS=Bos taurus OX=9913 GN=AMELX PE=1 SV=2	1	hf1_10472_ebo_34_1_261219.ScanId;v=1;d1=10243.10243.2	controllerType=0 controllerNumber=1 scan=10243	25.5407
11546:2	1	S.M[+15.995]PLPPHP.G		M[+16]	402.709	2	804.411	804.407	0	5.2	17	Non	409.86	221.62	73.63	3.91	2376	>sp|P02817|AMELX_BOVIN Amelogenin, X isoform OS=Bos taurus OX=9913 GN=AMELX PE=1 SV=2	1	hf1_10472_ebo_34_1_261219.ScanId;v=1;d1=10036.10036.2	controllerType=0 controllerNumber=1 scan=10036	25.1826
10669:2	1	S.M[+15.995]PLPPHP.G		M[+16]	402.709	2	804.411	804.407	0	4.7	17	Non	421.83	230.26	93.76	4.39	2376	>sp|P02817|AMELX_BOVIN Amelogenin, X isoform OS=Bos taurus OX=9913 GN=AMELX PE=1 SV=2	1	hf1_10472_ebo_34_1_261219.ScanId;v=1;d1=9434.9434.2	controllerType=0 controllerNumber=1 scan=9434	24.1494
10112:2	1	S.M[+15.995]PLPPHP.G		M[+16]	402.709	2	804.412	804.407	0	5.5	17	Non	438.42	273.44	94.68	4.76	2376	>sp|P02817|AMELX_BOVIN Amelogenin, X isoform OS=Bos taurus OX=9913 GN=AMELX PE=1 SV=2	1	hf1_10472_ebo_34_1_261219.ScanId;v=1;d1=9039.9039.2	controllerType=0 controllerNumber=1 scan=9039	23.462
10408:2	1	S.M[+15.995]PLPPHP.G		M[+16]	402.709	2	804.411	804.407	0	4.4	17	Non	446.12	236.29	95.01	4.21	2376	>sp|P02817|AMELX_BOVIN Amelogenin, X isoform OS=Bos taurus OX=9913 GN=AMELX PE=1 SV=2	1	hf1_10472_ebo_34_1_261219.ScanId;v=1;d1=9241.9241.2	controllerType=0 controllerNumber=1 scan=9241	23.806
09520:2	1	S.M[+15.995]PLPPHP.G		M[+16]	402.71	2	804.412	804.407	0	5.8	17	Non	446.68	269.03	97.76	5.43	2376	>sp|P02817|AMELX_BOVIN Amelogenin, X isoform OS=Bos taurus OX=9913 GN=AMELX PE=1 SV=2	1	hf1_10472_ebo_34_1_261219.ScanId;v=1;d1=8629.8629.2	controllerType=0 controllerNumber=1 scan=8629	22.7646
09217:2	1	S.M[+15.995]PLPPHP.G		M[+16]	402.709	2	804.411	804.407	0	4.9	17	Non	449.83	283.07	91.15	4.81	2376	>sp|P02817|AMELX_BOVIN Amelogenin, X isoform OS=Bos taurus OX=9913 GN=AMELX PE=1 SV=2	1	hf1_10472_ebo_34_1_261219.ScanId;v=1;d1=8427.8427.2	controllerType=0 controllerNumber=1 scan=8427	22.4216
08917:2	1	S.M[+15.995]PLPPHP.G		M[+16]	402.709	2	804.412	804.407	0	5.3	17	Non	451.54	268.06	93.75	4.53	2376	>sp|P02817|AMELX_BOVIN Amelogenin, X isoform OS=Bos taurus OX=9913 GN=AMELX PE=1 SV=2	1	hf1_10472_ebo_34_1_261219.ScanId;v=1;d1=8214.8214.2	controllerType=0 controllerNumber=1 scan=8214	22.0625
09808:2	1	S.M[+15.995]PLPPHP.G		M[+16]	402.71	2	804.412	804.407	0	6.4	17	Non	454.83	256.27	92.03	4.74	2376	>sp|P02817|AMELX_BOVIN Amelogenin, X isoform OS=Bos taurus OX=9913 GN=AMELX PE=1 SV=2	1	hf1_10472_ebo_34_1_261219.ScanId;v=1;d1=8832.8832.2	controllerType=0 controllerNumber=1 scan=8832	23.1117
11256:2	1	S.M[+15.995]PLPPHP.G		M[+16]	402.709	2	804.41	804.407	0	3.8	17	Non	456.1	265.82	87.28	4.32	2376	>sp|P02817|AMELX_BOVIN Amelogenin, X isoform OS=Bos taurus OX=9913 GN=AMELX PE=1 SV=2	1	hf1_10472_ebo_34_1_261219.ScanId;v=1;d1=9836.9836.2	controllerType=0 controllerNumber=1 scan=9836	24.8395
10953:2	1	S.M[+15.995]PLPPHP.G		M[+16]	402.709	2	804.411	804.407	0	4.9	17	Non	468.18	269.03	93.99	4.51	2376	>sp|P02817|AMELX_BOVIN Amelogenin, X isoform OS=Bos taurus OX=9913 GN=AMELX PE=1 SV=2	1	hf1_10472_ebo_34_1_261219.ScanId;v=1;d1=9630.9630.2	controllerType=0 controllerNumber=1 scan=9630	24.4952
05730:2	1	S.M[+15.995]PLP[+15.995]PHP.G		M[+16], P[+16]	410.707	2	820.406	820.402	0	4.5	17	Non	169.63	46.85	9.14	0.48	2376	>sp|P02817|AMELX_BOVIN Amelogenin, X isoform OS=Bos taurus OX=9913 GN=AMELX PE=1 SV=2	1	hf1_10472_ebo_34_1_261219.ScanId;v=1;d1=6003.6003.2	controllerType=0 controllerNumber=1 scan=6003	18.3409
06039:2	1	S.M[+15.995]PLP[+15.995]PHP.G		M[+16], P[+16]	410.707	2	820.406	820.402	0	4.6	17	Non	180.37	124.25	15.73	0.26	2376	>sp|P02817|AMELX_BOVIN Amelogenin, X isoform OS=Bos taurus OX=9913 GN=AMELX PE=1 SV=2	1	hf1_10472_ebo_34_1_261219.ScanId;v=1;d1=6220.6220.2	controllerType=0 controllerNumber=1 scan=6220	18.7121
07830:2	1	S.M[+15.995]PLPPH[+15.995]P.G		H[+16], M[+16]	410.707	2	820.407	820.402	0	5.8	17	Non	218.76	111.9	7.31	0.56	2376	>sp|P02817|AMELX_BOVIN Amelogenin, X isoform OS=Bos taurus OX=9913 GN=AMELX PE=1 SV=2	1	hf1_10472_ebo_34_1_261219.ScanId;v=1;d1=7463.7463.2	controllerType=0 controllerNumber=1 scan=7463	20.7881
11164:2	1	S.M[+15.995]P[+15.995]LPPHP.G		M[+16], P[+16]	410.706	2	820.404	820.402	0	2.7	17	Non	221.73	177.15	4.29	2.31	2376	>sp|P02817|AMELX_BOVIN Amelogenin, X isoform OS=Bos taurus OX=9913 GN=AMELX PE=1 SV=2	1	hf1_10472_ebo_34_1_261219.ScanId;v=1;d1=9769.9769.2	controllerType=0 controllerNumber=1 scan=9769	24.7223
06312:2	1	S.M[+15.995]PLPP[+15.995]HP.G		M[+16], P[+16]	410.707	2	820.407	820.402	0	5.8	17	Non	223.44	204.73	0.79	1.55	2376	>sp|P02817|AMELX_BOVIN Amelogenin, X isoform OS=Bos taurus OX=9913 GN=AMELX PE=1 SV=2	1	hf1_10472_ebo_34_1_261219.ScanId;v=1;d1=6413.6413.2	controllerType=0 controllerNumber=1 scan=6413	19.039
08121:2	1	S.M[+15.995]PLPPH[+15.995]P.G		H[+16], M[+16]	410.706	2	820.405	820.402	0	4	17	Non	237.93	108.49	15.71	1.21	2376	>sp|P02817|AMELX_BOVIN Amelogenin, X isoform OS=Bos taurus OX=9913 GN=AMELX PE=1 SV=2	1	hf1_10472_ebo_34_1_261219.ScanId;v=1;d1=7665.7665.2	controllerType=0 controllerNumber=1 scan=7665	21.1329
08589:2	1	S.M[+15.995]PLPPH[+15.995]P.G		H[+16], M[+16]	410.706	2	820.405	820.402	0	3.9	17	Non	242.23	92.2	8.04	2.35	2376	>sp|P02817|AMELX_BOVIN Amelogenin, X isoform OS=Bos taurus OX=9913 GN=AMELX PE=1 SV=2	1	hf1_10472_ebo_34_1_261219.ScanId;v=1;d1=7986.7986.2	controllerType=0 controllerNumber=1 scan=7986	21.6722
11612:2	1	S.M[+15.995]P[+15.995]LPPHP.G		M[+16], P[+16]	410.707	2	820.406	820.402	0	4.9	17	Non	287.33	193.43	9.25	3.57	2376	>sp|P02817|AMELX_BOVIN Amelogenin, X isoform OS=Bos taurus OX=9913 GN=AMELX PE=1 SV=2	1	hf1_10472_ebo_34_1_261219.ScanId;v=1;d1=10082.10082.2	controllerType=0 controllerNumber=1 scan=10082	25.2617
07407:2	1	S.M[+15.995]PLPPHP[+15.995].G		M[+16], P[+16]	410.707	2	820.407	820.402	0	5.7	17	Non	292.27	149.33	35.1	3.09	2376	>sp|P02817|AMELX_BOVIN Amelogenin, X isoform OS=Bos taurus OX=9913 GN=AMELX PE=1 SV=2	1	hf1_10472_ebo_34_1_261219.ScanId;v=1;d1=7173.7173.2	controllerType=0 controllerNumber=1 scan=7173	20.3061
07111:2	1	S.M[+15.995]PLPPH[+15.995]P.G		H[+16], M[+16]	410.707	2	820.406	820.402	0	4.6	17	Non	319.25	202.63	14.88	3.49	2376	>sp|P02817|AMELX_BOVIN Amelogenin, X isoform OS=Bos taurus OX=9913 GN=AMELX PE=1 SV=2	1	hf1_10472_ebo_34_1_261219.ScanId;v=1;d1=6969.6969.2	controllerType=0 controllerNumber=1 scan=6969	19.9625
50609:2	1	S.MPLPPHPG.H			423.223	2	845.438	845.434	0	4.6	17	Non	64.73	64.73	64.73	0.76	2376	>sp|P02817|AMELX_BOVIN Amelogenin, X isoform OS=Bos taurus OX=9913 GN=AMELX PE=1 SV=2	1	hf1_10472_ebo_34_1_261219.ScanId;v=1;d1=37491.37491.2	controllerType=0 controllerNumber=1 scan=37491	76.8841
50654:2	1	S.MPLPPHPG.H			423.223	2	845.438	845.434	0	5.1	17	Non	169.91	169.91	169.91	2.37	2376	>sp|P02817|AMELX_BOVIN Amelogenin, X isoform OS=Bos taurus OX=9913 GN=AMELX PE=1 SV=2	1	hf1_10472_ebo_34_1_261219.ScanId;v=1;d1=37567.37567.2	controllerType=0 controllerNumber=1 scan=37567	77.2298
50536:2	1	S.MPLPPHPG.H			423.222	2	845.437	845.434	0	3.3	17	Non	186.12	186.12	186.12	2.57	2376	>sp|P02817|AMELX_BOVIN Amelogenin, X isoform OS=Bos taurus OX=9913 GN=AMELX PE=1 SV=2	1	hf1_10472_ebo_34_1_261219.ScanId;v=1;d1=37404.37404.2	controllerType=0 controllerNumber=1 scan=37404	76.5466
15696:2	1	S.MPLPPHPG.H			423.222	2	845.436	845.434	0	2.9	17	Non	248.48	224.36	224.36	2.66	2376	>sp|P02817|AMELX_BOVIN Amelogenin, X isoform OS=Bos taurus OX=9913 GN=AMELX PE=1 SV=2	1	hf1_10472_ebo_34_1_261219.ScanId;v=1;d1=12810.12810.2	controllerType=0 controllerNumber=1 scan=12810	29.8745
47325:2	1	S.MPLPPHPG.H			423.222	2	845.437	845.434	0	3.2	17	Non	272.2	272.2	272.2	3.88	2376	>sp|P02817|AMELX_BOVIN Amelogenin, X isoform OS=Bos taurus OX=9913 GN=AMELX PE=1 SV=2	1	hf1_10472_ebo_34_1_261219.ScanId;v=1;d1=34319.34319.2	controllerType=0 controllerNumber=1 scan=34319	67.9836
14826:1	1	S.MPLPPHPG.H			845.437	1	845.437	845.434	0	4.1	17	Non	276.26	229.58	229.58	3.83	2376	>sp|P02817|AMELX_BOVIN Amelogenin, X isoform OS=Bos taurus OX=9913 GN=AMELX PE=1 SV=2	1	hf1_10472_ebo_34_1_261219.ScanId;v=1;d1=12218.12218.2	controllerType=0 controllerNumber=1 scan=12218	28.9113
49221:2	1	S.MPLPPHPG.H			423.222	2	845.437	845.434	0	3.3	17	Non	282.07	282.07	282.07	4.37	2376	>sp|P02817|AMELX_BOVIN Amelogenin, X isoform OS=Bos taurus OX=9913 GN=AMELX PE=1 SV=2	1	hf1_10472_ebo_34_1_261219.ScanId;v=1;d1=35968.35968.2	controllerType=0 controllerNumber=1 scan=35968	71.8464
49386:2	1	S.MPLPPHPG.H			423.222	2	845.436	845.434	0	3.1	17	Non	283.73	283.73	283.73	4.14	2376	>sp|P02817|AMELX_BOVIN Amelogenin, X isoform OS=Bos taurus OX=9913 GN=AMELX PE=1 SV=2	1	hf1_10472_ebo_34_1_261219.ScanId;v=1;d1=36109.36109.2	controllerType=0 controllerNumber=1 scan=36109	72.1945
48012:2	1	S.MPLPPHPG.H			423.222	2	845.437	845.434	0	3.4	17	Non	283.87	283.87	283.87	4.14	2376	>sp|P02817|AMELX_BOVIN Amelogenin, X isoform OS=Bos taurus OX=9913 GN=AMELX PE=1 SV=2	1	hf1_10472_ebo_34_1_261219.ScanId;v=1;d1=34914.34914.2	controllerType=0 controllerNumber=1 scan=34914	69.3575
48366:2	1	S.MPLPPHPG.H			423.222	2	845.437	845.434	0	3.8	17	Non	290.04	290.04	290.04	4.08	2376	>sp|P02817|AMELX_BOVIN Amelogenin, X isoform OS=Bos taurus OX=9913 GN=AMELX PE=1 SV=2	1	hf1_10472_ebo_34_1_261219.ScanId;v=1;d1=35227.35227.2	controllerType=0 controllerNumber=1 scan=35227	70.1351
48729:2	1	S.MPLPPHPG.H			423.222	2	845.436	845.434	0	2.9	17	Non	291.88	291.88	291.88	4.27	2376	>sp|P02817|AMELX_BOVIN Amelogenin, X isoform OS=Bos taurus OX=9913 GN=AMELX PE=1 SV=2	1	hf1_10472_ebo_34_1_261219.ScanId;v=1;d1=35531.35531.2	controllerType=0 controllerNumber=1 scan=35531	70.8182
48572:2	1	S.MPLPPHPG.H			423.222	2	845.437	845.434	0	3.6	17	Non	294.78	294.78	294.78	4.27	2376	>sp|P02817|AMELX_BOVIN Amelogenin, X isoform OS=Bos taurus OX=9913 GN=AMELX PE=1 SV=2	1	hf1_10472_ebo_34_1_261219.ScanId;v=1;d1=35390.35390.2	controllerType=0 controllerNumber=1 scan=35390	70.4757
14784:1	1	S.MPLPPHPG.H			845.438	1	845.438	845.434	0	5.3	17	Non	300.62	279.75	279.75	4.3	2376	>sp|P02817|AMELX_BOVIN Amelogenin, X isoform OS=Bos taurus OX=9913 GN=AMELX PE=1 SV=2	1	hf1_10472_ebo_34_1_261219.ScanId;v=1;d1=12188.12188.2	controllerType=0 controllerNumber=1 scan=12188	28.8672
13454:1	1	S.MPLPPHPG.H			845.438	1	845.438	845.434	0	4.6	17	Non	319.15	296.13	296.13	4.7	2376	>sp|P02817|AMELX_BOVIN Amelogenin, X isoform OS=Bos taurus OX=9913 GN=AMELX PE=1 SV=2	1	hf1_10472_ebo_34_1_261219.ScanId;v=1;d1=11317.11317.2	controllerType=0 controllerNumber=1 scan=11317	27.3905
47184:2	1	S.MPLPPHPG.H			423.222	2	845.437	845.434	0	3.8	17	Non	323.97	323.97	323.97	4.43	2376	>sp|P02817|AMELX_BOVIN Amelogenin, X isoform OS=Bos taurus OX=9913 GN=AMELX PE=1 SV=2	1	hf1_10472_ebo_34_1_261219.ScanId;v=1;d1=34186.34186.2	controllerType=0 controllerNumber=1 scan=34186	67.6393
47848:2	1	S.MPLPPHPG.H			423.222	2	845.436	845.434	0	2.7	17	Non	329.56	329.56	329.56	3.92	2376	>sp|P02817|AMELX_BOVIN Amelogenin, X isoform OS=Bos taurus OX=9913 GN=AMELX PE=1 SV=2	1	hf1_10472_ebo_34_1_261219.ScanId;v=1;d1=34768.34768.2	controllerType=0 controllerNumber=1 scan=34768	69.017
47675:2	1	S.MPLPPHPG.H			423.222	2	845.437	845.434	0	3.5	17	Non	339.59	339.59	339.59	4.62	2376	>sp|P02817|AMELX_BOVIN Amelogenin, X isoform OS=Bos taurus OX=9913 GN=AMELX PE=1 SV=2	1	hf1_10472_ebo_34_1_261219.ScanId;v=1;d1=34616.34616.2	controllerType=0 controllerNumber=1 scan=34616	68.6699
48875:2	1	S.MPLPPHPG.H			423.222	2	845.437	845.434	0	3.3	17	Non	342.83	342.83	342.83	4.34	2376	>sp|P02817|AMELX_BOVIN Amelogenin, X isoform OS=Bos taurus OX=9913 GN=AMELX PE=1 SV=2	1	hf1_10472_ebo_34_1_261219.ScanId;v=1;d1=35669.35669.2	controllerType=0 controllerNumber=1 scan=35669	71.1613
15673:2	1	S.MPLPPHPG.H			423.222	2	845.436	845.434	0	2.4	17	Non	351.68	299.61	299.61	3.55	2376	>sp|P02817|AMELX_BOVIN Amelogenin, X isoform OS=Bos taurus OX=9913 GN=AMELX PE=1 SV=2	1	hf1_10472_ebo_34_1_261219.ScanId;v=1;d1=12794.12794.2	controllerType=0 controllerNumber=1 scan=12794	29.8504
49056:2	1	S.MPLPPHPG.H			423.222	2	845.437	845.434	0	3.6	17	Non	369.57	369.57	369.57	5.45	2376	>sp|P02817|AMELX_BOVIN Amelogenin, X isoform OS=Bos taurus OX=9913 GN=AMELX PE=1 SV=2	1	hf1_10472_ebo_34_1_261219.ScanId;v=1;d1=35821.35821.2	controllerType=0 controllerNumber=1 scan=35821	71.5059
47487:2	1	S.MPLPPHPG.H			423.222	2	845.437	845.434	0	3.2	17	Non	379.55	355.95	355.95	4.52	2376	>sp|P02817|AMELX_BOVIN Amelogenin, X isoform OS=Bos taurus OX=9913 GN=AMELX PE=1 SV=2	1	hf1_10472_ebo_34_1_261219.ScanId;v=1;d1=34463.34463.2	controllerType=0 controllerNumber=1 scan=34463	68.3226
14737:2	1	S.MPLPPHPG.H			423.223	2	845.438	845.434	0	4.6	17	Non	397.89	339.45	339.45	4.78	2376	>sp|P02817|AMELX_BOVIN Amelogenin, X isoform OS=Bos taurus OX=9913 GN=AMELX PE=1 SV=2	1	hf1_10472_ebo_34_1_261219.ScanId;v=1;d1=12154.12154.2	controllerType=0 controllerNumber=1 scan=12154	28.8093
13205:2	1	S.MPLPPHPG.H			423.222	2	845.437	845.434	0	4.2	17	Non	406.6	406.6	406.6	5.73	2376	>sp|P02817|AMELX_BOVIN Amelogenin, X isoform OS=Bos taurus OX=9913 GN=AMELX PE=1 SV=2	1	hf1_10472_ebo_34_1_261219.ScanId;v=1;d1=11151.11151.2	controllerType=0 controllerNumber=1 scan=11151	27.1091
13798:2	1	S.MPLPPHPG.H			423.223	2	845.439	845.434	0	5.6	17	Non	409.97	347.23	347.23	5.01	2376	>sp|P02817|AMELX_BOVIN Amelogenin, X isoform OS=Bos taurus OX=9913 GN=AMELX PE=1 SV=2	1	hf1_10472_ebo_34_1_261219.ScanId;v=1;d1=11547.11547.2	controllerType=0 controllerNumber=1 scan=11547	27.786
15350:2	1	S.MPLPPHPG.H			423.222	2	845.438	845.434	0	4.4	17	Non	412.92	316.42	316.42	4.63	2376	>sp|P02817|AMELX_BOVIN Amelogenin, X isoform OS=Bos taurus OX=9913 GN=AMELX PE=1 SV=2	1	hf1_10472_ebo_34_1_261219.ScanId;v=1;d1=12572.12572.2	controllerType=0 controllerNumber=1 scan=12572	29.5038
15047:2	1	S.MPLPPHPG.H			423.222	2	845.437	845.434	0	3.7	17	Non	418.24	347.89	347.89	4.87	2376	>sp|P02817|AMELX_BOVIN Amelogenin, X isoform OS=Bos taurus OX=9913 GN=AMELX PE=1 SV=2	1	hf1_10472_ebo_34_1_261219.ScanId;v=1;d1=12366.12366.2	controllerType=0 controllerNumber=1 scan=12366	29.1607
13495:2	1	S.MPLPPHPG.H			423.223	2	845.438	845.434	0	5.3	17	Non	419.58	400.19	400.19	6.04	2376	>sp|P02817|AMELX_BOVIN Amelogenin, X isoform OS=Bos taurus OX=9913 GN=AMELX PE=1 SV=2	1	hf1_10472_ebo_34_1_261219.ScanId;v=1;d1=11348.11348.2	controllerType=0 controllerNumber=1 scan=11348	27.4458
14108:2	1	S.MPLPPHPG.H			423.223	2	845.439	845.434	0	6.4	17	Non	424.89	358.55	358.55	5.15	2376	>sp|P02817|AMELX_BOVIN Amelogenin, X isoform OS=Bos taurus OX=9913 GN=AMELX PE=1 SV=2	1	hf1_10472_ebo_34_1_261219.ScanId;v=1;d1=11747.11747.2	controllerType=0 controllerNumber=1 scan=11747	28.1229
14419:2	1	S.MPLPPHPG.H			423.223	2	845.439	845.434	0	6.1	17	Non	428.34	327.49	327.49	5.05	2376	>sp|P02817|AMELX_BOVIN Amelogenin, X isoform OS=Bos taurus OX=9913 GN=AMELX PE=1 SV=2	1	hf1_10472_ebo_34_1_261219.ScanId;v=1;d1=11945.11945.2	controllerType=0 controllerNumber=1 scan=11945	28.4622
13893:1	1	S.MPLPPHPG.H			845.438	1	845.438	845.434	0	5.3	17	Non	453.04	366.14	366.14	6.14	2376	>sp|P02817|AMELX_BOVIN Amelogenin, X isoform OS=Bos taurus OX=9913 GN=AMELX PE=1 SV=2	1	hf1_10472_ebo_34_1_261219.ScanId;v=1;d1=11609.11609.2	controllerType=0 controllerNumber=1 scan=11609	27.8844
50703:2	1	S.M[+15.995]PLPPHPG.H		M[+16]	431.221	2	861.434	861.429	0	5.7	17	Non	34.22	34.22	34.22	0.68	2376	>sp|P02817|AMELX_BOVIN Amelogenin, X isoform OS=Bos taurus OX=9913 GN=AMELX PE=1 SV=2	1	hf1_10472_ebo_34_1_261219.ScanId;v=1;d1=37656.37656.3	controllerType=0 controllerNumber=1 scan=37656	77.6286
47708:2	1	S.M[+15.995]PLPPHPG.H		M[+16]	431.22	2	861.433	861.429	0	4.6	17	Non	43.24	43.24	24.67	0.54	2376	>sp|P02817|AMELX_BOVIN Amelogenin, X isoform OS=Bos taurus OX=9913 GN=AMELX PE=1 SV=2	1	hf1_10472_ebo_34_1_261219.ScanId;v=1;d1=34650.34650.2	controllerType=0 controllerNumber=1 scan=34650	68.7504
47886:2	1	S.M[+15.995]PLPPHPG.H		M[+16]	431.22	2	861.432	861.429	0	3.8	17	Non	46.48	46.48	22.9	0.48	2376	>sp|P02817|AMELX_BOVIN Amelogenin, X isoform OS=Bos taurus OX=9913 GN=AMELX PE=1 SV=2	1	hf1_10472_ebo_34_1_261219.ScanId;v=1;d1=34801.34801.2	controllerType=0 controllerNumber=1 scan=34801	69.0929
00524:2	1	S.M[+15.995]PLPPHPG.H		M[+16]	431.219	2	861.432	861.429	0	3.3	17	Non	52.63	52.63	28.62	0.48	2376	>sp|P02817|AMELX_BOVIN Amelogenin, X isoform OS=Bos taurus OX=9913 GN=AMELX PE=1 SV=2	1	hf1_10472_ebo_34_1_261219.ScanId;v=1;d1=2256.2256.2	controllerType=0 controllerNumber=1 scan=2256	12.0484
00436:2	1	S.M[+15.995]PLPPHPG.H		M[+16]	431.219	2	861.432	861.429	0	3.4	17	Non	57.36	57.36	28.36	0.76	2376	>sp|P02817|AMELX_BOVIN Amelogenin, X isoform OS=Bos taurus OX=9913 GN=AMELX PE=1 SV=2	1	hf1_10472_ebo_34_1_261219.ScanId;v=1;d1=2093.2093.2	controllerType=0 controllerNumber=1 scan=2093	11.3048
00308:2	1	S.MP[+15.995]LPPHPG.H		P[+16]	431.219	2	861.431	861.429	0	2.6	17	Non	61.43	61.43	4	0.56	2376	>sp|P02817|AMELX_BOVIN Amelogenin, X isoform OS=Bos taurus OX=9913 GN=AMELX PE=1 SV=2	1	hf1_10472_ebo_34_1_261219.ScanId;v=1;d1=1870.1870.2	controllerType=0 controllerNumber=1 scan=1870	10.2854
50461:2	1	S.M[+15.995]PLPPHPG.H		M[+16]	431.22	2	861.432	861.429	0	4	17	Non	80.55	80.55	32.48	0.89	2376	>sp|P02817|AMELX_BOVIN Amelogenin, X isoform OS=Bos taurus OX=9913 GN=AMELX PE=1 SV=2	1	hf1_10472_ebo_34_1_261219.ScanId;v=1;d1=37316.37316.2	controllerType=0 controllerNumber=1 scan=37316	76.2364
09558:1	1	S.M[+15.995]PLPPHPG.H		M[+16]	861.435	1	861.435	861.429	0	6.9	17	Non	95.92	95.92	28.25	0.75	2376	>sp|P02817|AMELX_BOVIN Amelogenin, X isoform OS=Bos taurus OX=9913 GN=AMELX PE=1 SV=2	1	hf1_10472_ebo_34_1_261219.ScanId;v=1;d1=8660.8660.2	controllerType=0 controllerNumber=1 scan=8660	22.8172
08949:1	1	S.M[+15.995]PLPPHPG.H		M[+16]	861.434	1	861.434	861.429	0	5.7	17	Non	128.67	128.67	34.33	1.31	2376	>sp|P02817|AMELX_BOVIN Amelogenin, X isoform OS=Bos taurus OX=9913 GN=AMELX PE=1 SV=2	1	hf1_10472_ebo_34_1_261219.ScanId;v=1;d1=8236.8236.2	controllerType=0 controllerNumber=1 scan=8236	22.0993
00400:2	1	S.M[+15.995]PLPPHPG.H		M[+16]	431.219	2	861.432	861.429	0	3.2	17	Non	129.75	129.75	30.26	1.07	2376	>sp|P02817|AMELX_BOVIN Amelogenin, X isoform OS=Bos taurus OX=9913 GN=AMELX PE=1 SV=2	1	hf1_10472_ebo_34_1_261219.ScanId;v=1;d1=2022.2022.2	controllerType=0 controllerNumber=1 scan=2022	10.968
50565:2	1	S.M[+15.995]PLPPHPG.H		M[+16]	431.22	2	861.432	861.429	0	3.8	17	Non	156.47	156.47	60.14	2.42	2376	>sp|P02817|AMELX_BOVIN Amelogenin, X isoform OS=Bos taurus OX=9913 GN=AMELX PE=1 SV=2	1	hf1_10472_ebo_34_1_261219.ScanId;v=1;d1=37424.37424.2	controllerType=0 controllerNumber=1 scan=37424	76.5857
00369:2	1	S.M[+15.995]PLPPHPG.H		M[+16]	431.219	2	861.432	861.429	0	3.2	17	Non	174.21	174.21	66.3	2.43	2376	>sp|P02817|AMELX_BOVIN Amelogenin, X isoform OS=Bos taurus OX=9913 GN=AMELX PE=1 SV=2	1	hf1_10472_ebo_34_1_261219.ScanId;v=1;d1=1953.1953.2	controllerType=0 controllerNumber=1 scan=1953	10.6296
49315:2	1	S.M[+15.995]PLPPHPG.H		M[+16]	431.221	2	861.434	861.429	0	5.8	17	Non	177.87	177.87	47.98	2.5	2376	>sp|P02817|AMELX_BOVIN Amelogenin, X isoform OS=Bos taurus OX=9913 GN=AMELX PE=1 SV=2	1	hf1_10472_ebo_34_1_261219.ScanId;v=1;d1=36047.36047.2	controllerType=0 controllerNumber=1 scan=36047	72.0497
49475:2	1	S.M[+15.995]PLPPHPG.H		M[+16]	431.22	2	861.434	861.429	0	5.6	17	Non	184.91	184.91	52.4	2.7	2376	>sp|P02817|AMELX_BOVIN Amelogenin, X isoform OS=Bos taurus OX=9913 GN=AMELX PE=1 SV=2	1	hf1_10472_ebo_34_1_261219.ScanId;v=1;d1=36197.36197.2	controllerType=0 controllerNumber=1 scan=36197	72.4077
46920:2	1	S.M[+15.995]PLPPHPG.H		M[+16]	431.22	2	861.432	861.429	0	4.1	17	Non	209.93	209.93	75.15	2.6	2376	>sp|P02817|AMELX_BOVIN Amelogenin, X isoform OS=Bos taurus OX=9913 GN=AMELX PE=1 SV=2	1	hf1_10472_ebo_34_1_261219.ScanId;v=1;d1=33954.33954.2	controllerType=0 controllerNumber=1 scan=33954	67.0845
11846:2	1	S.MPLPP[+31.990]HPG.H		P[+32]	439.217	2	877.426	877.424	0	2.9	17	Non	213.92	97.93	15.7	0.89	2376	>sp|P02817|AMELX_BOVIN Amelogenin, X isoform OS=Bos taurus OX=9913 GN=AMELX PE=1 SV=2	1	hf1_10472_ebo_34_1_261219.ScanId;v=1;d1=10237.10237.3	controllerType=0 controllerNumber=1 scan=10237	25.529
48901:2	1	S.M[+15.995]PLPPHPG.H		M[+16]	431.22	2	861.433	861.429	0	5	17	Non	217.32	217.32	61.64	2.87	2376	>sp|P02817|AMELX_BOVIN Amelogenin, X isoform OS=Bos taurus OX=9913 GN=AMELX PE=1 SV=2	1	hf1_10472_ebo_34_1_261219.ScanId;v=1;d1=35690.35690.2	controllerType=0 controllerNumber=1 scan=35690	71.2089
49083:2	1	S.M[+15.995]PLPPHPG.H		M[+16]	431.22	2	861.434	861.429	0	5.6	17	Non	244.53	244.53	61.26	4.25	2376	>sp|P02817|AMELX_BOVIN Amelogenin, X isoform OS=Bos taurus OX=9913 GN=AMELX PE=1 SV=2	1	hf1_10472_ebo_34_1_261219.ScanId;v=1;d1=35841.35841.2	controllerType=0 controllerNumber=1 scan=35841	71.547
47851:2	1	S.M[+15.995]PLPPHPG.H		M[+16]	431.219	2	861.432	861.429	0	3.6	17	Non	251.75	251.75	65.87	4.07	2376	>sp|P02817|AMELX_BOVIN Amelogenin, X isoform OS=Bos taurus OX=9913 GN=AMELX PE=1 SV=2	1	hf1_10472_ebo_34_1_261219.ScanId;v=1;d1=34770.34770.2	controllerType=0 controllerNumber=1 scan=34770	69.02
47667:2	1	S.M[+15.995]PLPPHPG.H		M[+16]	431.22	2	861.432	861.429	0	4.1	17	Non	253.62	253.62	64.93	4.02	2376	>sp|P02817|AMELX_BOVIN Amelogenin, X isoform OS=Bos taurus OX=9913 GN=AMELX PE=1 SV=2	1	hf1_10472_ebo_34_1_261219.ScanId;v=1;d1=34608.34608.2	controllerType=0 controllerNumber=1 scan=34608	68.655
00016:2	1	S.M[+15.995]PLPPHPG.H		M[+16]	431.22	2	861.433	861.429	0	5.3	17	Non	253.92	253.92	56.61	3.97	2376	>sp|P02817|AMELX_BOVIN Amelogenin, X isoform OS=Bos taurus OX=9913 GN=AMELX PE=1 SV=2	1	hf1_10472_ebo_34_1_261219.ScanId;v=1;d1=111.111.2	controllerType=0 controllerNumber=1 scan=111	0.5509
48018:2	1	S.M[+15.995]PLPPHPG.H		M[+16]	431.22	2	861.432	861.429	0	4.1	17	Non	256.58	256.58	63.55	4.21	2376	>sp|P02817|AMELX_BOVIN Amelogenin, X isoform OS=Bos taurus OX=9913 GN=AMELX PE=1 SV=2	1	hf1_10472_ebo_34_1_261219.ScanId;v=1;d1=34919.34919.2	controllerType=0 controllerNumber=1 scan=34919	69.3705
47484:2	1	S.M[+15.995]PLPPHPG.H		M[+16]	431.22	2	861.432	861.429	0	4.1	17	Non	271.02	265.71	63.9	4.16	2376	>sp|P02817|AMELX_BOVIN Amelogenin, X isoform OS=Bos taurus OX=9913 GN=AMELX PE=1 SV=2	1	hf1_10472_ebo_34_1_261219.ScanId;v=1;d1=34460.34460.2	controllerType=0 controllerNumber=1 scan=34460	68.3152
10757:2	1	S.M[+15.995]PLPPHPG.H		M[+16]	431.22	2	861.433	861.429	0	5.1	17	Non	409.15	304.23	61.79	4.58	2376	>sp|P02817|AMELX_BOVIN Amelogenin, X isoform OS=Bos taurus OX=9913 GN=AMELX PE=1 SV=2	1	hf1_10472_ebo_34_1_261219.ScanId;v=1;d1=9495.9495.2	controllerType=0 controllerNumber=1 scan=9495	24.2596
10487:2	1	S.M[+15.995]PLPPHPG.H		M[+16]	431.22	2	861.433	861.429	0	5	17	Non	421.48	320.35	93.23	4.61	2376	>sp|P02817|AMELX_BOVIN Amelogenin, X isoform OS=Bos taurus OX=9913 GN=AMELX PE=1 SV=2	1	hf1_10472_ebo_34_1_261219.ScanId;v=1;d1=9297.9297.2	controllerType=0 controllerNumber=1 scan=9297	23.9059
08186:2	1	S.M[+15.995]PLPPHPG.H		M[+16]	431.22	2	861.433	861.429	0	5.3	17	Non	424.65	383.53	85.2	5.99	2376	>sp|P02817|AMELX_BOVIN Amelogenin, X isoform OS=Bos taurus OX=9913 GN=AMELX PE=1 SV=2	1	hf1_10472_ebo_34_1_261219.ScanId;v=1;d1=7709.7709.2	controllerType=0 controllerNumber=1 scan=7709	21.2087
09349:2	1	S.M[+15.995]PLPPHPG.H		M[+16]	431.221	2	861.434	861.429	0	6	17	Non	432.03	409.1	100.01	6.66	2376	>sp|P02817|AMELX_BOVIN Amelogenin, X isoform OS=Bos taurus OX=9913 GN=AMELX PE=1 SV=2	1	hf1_10472_ebo_34_1_261219.ScanId;v=1;d1=8518.8518.2	controllerType=0 controllerNumber=1 scan=8518	22.5769
08775:2	1	S.M[+15.995]PLPPHPG.H		M[+16]	431.22	2	861.433	861.429	0	5.4	17	Non	437.12	375.52	101.67	6.66	2376	>sp|P02817|AMELX_BOVIN Amelogenin, X isoform OS=Bos taurus OX=9913 GN=AMELX PE=1 SV=2	1	hf1_10472_ebo_34_1_261219.ScanId;v=1;d1=8114.8114.2	controllerType=0 controllerNumber=1 scan=8114	21.891
07892:2	1	S.M[+15.995]PLPPHPG.H		M[+16]	431.221	2	861.434	861.429	0	6	17	Non	444.98	371.71	99.19	5.99	2376	>sp|P02817|AMELX_BOVIN Amelogenin, X isoform OS=Bos taurus OX=9913 GN=AMELX PE=1 SV=2	1	hf1_10472_ebo_34_1_261219.ScanId;v=1;d1=7503.7503.2	controllerType=0 controllerNumber=1 scan=7503	20.8576
09637:2	1	S.M[+15.995]PLPPHPG.H		M[+16]	431.221	2	861.435	861.429	0	7.3	17	Non	446.6	383.13	102.01	6.04	2376	>sp|P02817|AMELX_BOVIN Amelogenin, X isoform OS=Bos taurus OX=9913 GN=AMELX PE=1 SV=2	1	hf1_10472_ebo_34_1_261219.ScanId;v=1;d1=8717.8717.2	controllerType=0 controllerNumber=1 scan=8717	22.9174
08479:2	1	S.M[+15.995]PLPPHPG.H		M[+16]	431.221	2	861.434	861.429	0	6	17	Non	459.41	403.57	97.66	5.97	2376	>sp|P02817|AMELX_BOVIN Amelogenin, X isoform OS=Bos taurus OX=9913 GN=AMELX PE=1 SV=2	1	hf1_10472_ebo_34_1_261219.ScanId;v=1;d1=7912.7912.2	controllerType=0 controllerNumber=1 scan=7912	21.548
09936:2	1	S.M[+15.995]PLPPHPG.H		M[+16]	431.221	2	861.434	861.429	0	6.1	17	Non	465.08	381.12	119.3	6.02	2376	>sp|P02817|AMELX_BOVIN Amelogenin, X isoform OS=Bos taurus OX=9913 GN=AMELX PE=1 SV=2	1	hf1_10472_ebo_34_1_261219.ScanId;v=1;d1=8919.8919.2	controllerType=0 controllerNumber=1 scan=8919	23.2593
09062:2	1	S.M[+15.995]PLPPHPG.H		M[+16]	431.221	2	861.434	861.429	0	6.3	17	Non	477.61	411.98	125.41	5.97	2376	>sp|P02817|AMELX_BOVIN Amelogenin, X isoform OS=Bos taurus OX=9913 GN=AMELX PE=1 SV=2	1	hf1_10472_ebo_34_1_261219.ScanId;v=1;d1=8317.8317.2	controllerType=0 controllerNumber=1 scan=8317	22.2372
08835:2	1	S.M[+15.995]PLPPHP[+15.995]G.H		M[+16], P[+16]	439.217	2	877.427	877.424	0	3.2	17	Non	196.11	50.71	13.63	0.48	2376	>sp|P02817|AMELX_BOVIN Amelogenin, X isoform OS=Bos taurus OX=9913 GN=AMELX PE=1 SV=2	1	hf1_10472_ebo_34_1_261219.ScanId;v=1;d1=8154.8154.3	controllerType=0 controllerNumber=1 scan=8154	21.9586
06398:2	1	S.M[+15.995]PLPPH[+15.995]PG.H		H[+16], M[+16]	439.218	2	877.429	877.424	0	5.9	17	Non	236.29	72.29	2.33	0.54	2376	>sp|P02817|AMELX_BOVIN Amelogenin, X isoform OS=Bos taurus OX=9913 GN=AMELX PE=1 SV=2	1	hf1_10472_ebo_34_1_261219.ScanId;v=1;d1=6475.6475.2	controllerType=0 controllerNumber=1 scan=6475	19.143
07446:2	1	S.M[+15.995]PLPPH[+15.995]PG.H		H[+16], M[+16]	439.22	2	877.432	877.424	0	9.4	17	Non	271.09	123.76	6.06	1.34	2376	>sp|P02817|AMELX_BOVIN Amelogenin, X isoform OS=Bos taurus OX=9913 GN=AMELX PE=1 SV=2	1	hf1_10472_ebo_34_1_261219.ScanId;v=1;d1=7201.7201.2	controllerType=0 controllerNumber=1 scan=7201	20.3493
07013:2	1	S.M[+15.995]PLPPHP[+15.995]G.H		M[+16], P[+16]	439.218	2	877.429	877.424	0	6	17	Non	271.5	95.11	26.24	2.44	2376	>sp|P02817|AMELX_BOVIN Amelogenin, X isoform OS=Bos taurus OX=9913 GN=AMELX PE=1 SV=2	1	hf1_10472_ebo_34_1_261219.ScanId;v=1;d1=6898.6898.2	controllerType=0 controllerNumber=1 scan=6898	19.8447
06698:2	1	S.M[+15.995]PLPPHP[+15.995]G.H		M[+16], P[+16]	439.217	2	877.427	877.424	0	4.3	17	Non	284.42	108.4	37.35	2.45	2376	>sp|P02817|AMELX_BOVIN Amelogenin, X isoform OS=Bos taurus OX=9913 GN=AMELX PE=1 SV=2	1	hf1_10472_ebo_34_1_261219.ScanId;v=1;d1=6685.6685.2	controllerType=0 controllerNumber=1 scan=6685	19.493
07165:2	1	S.M[+15.995]PLPP[+31.990]HPG.H		M[+16], P[+32]	447.216	2	893.424	893.419	0	6.6	17	Non	290.67	219.66	8.45	3.68	2376	>sp|P02817|AMELX_BOVIN Amelogenin, X isoform OS=Bos taurus OX=9913 GN=AMELX PE=1 SV=2	1	hf1_10472_ebo_34_1_261219.ScanId;v=1;d1=7005.7005.2	controllerType=0 controllerNumber=1 scan=7005	20.0218
07749:2	1	S.M[+15.995]PLPP[+15.995]HPG.H		M[+16], P[+16]	439.218	2	877.428	877.424	0	5.5	17	Non	301.98	171.06	9.03	3.23	2376	>sp|P02817|AMELX_BOVIN Amelogenin, X isoform OS=Bos taurus OX=9913 GN=AMELX PE=1 SV=2	1	hf1_10472_ebo_34_1_261219.ScanId;v=1;d1=7409.7409.2	controllerType=0 controllerNumber=1 scan=7409	20.6966
05155:2	1	S.M[+15.995]PLP[+15.995]PHPG.H		M[+16], P[+16]	439.218	2	877.428	877.424	0	5.3	17	Non	318.5	204.65	16.72	3.35	2376	>sp|P02817|AMELX_BOVIN Amelogenin, X isoform OS=Bos taurus OX=9913 GN=AMELX PE=1 SV=2	1	hf1_10472_ebo_34_1_261219.ScanId;v=1;d1=5589.5589.2	controllerType=0 controllerNumber=1 scan=5589	17.6401
05792:2	1	S.M[+15.995]PLP[+15.995]PHPG.H		M[+16], P[+16]	439.218	2	877.428	877.424	0	5.1	17	Non	318.64	212.38	0.57	3.49	2376	>sp|P02817|AMELX_BOVIN Amelogenin, X isoform OS=Bos taurus OX=9913 GN=AMELX PE=1 SV=2	1	hf1_10472_ebo_34_1_261219.ScanId;v=1;d1=6047.6047.2	controllerType=0 controllerNumber=1 scan=6047	18.4156
06115:2	1	S.M[+15.995]PLPPH[+15.995]PG.H		H[+16], M[+16]	439.218	2	877.428	877.424	0	4.8	17	Non	323.58	135.86	3.18	2.49	2376	>sp|P02817|AMELX_BOVIN Amelogenin, X isoform OS=Bos taurus OX=9913 GN=AMELX PE=1 SV=2	1	hf1_10472_ebo_34_1_261219.ScanId;v=1;d1=6273.6273.2	controllerType=0 controllerNumber=1 scan=6273	18.8022
11413:2	1	S.MPLPPHPGH.P			491.752	2	982.497	982.493	0	4.9	17	Non	282.93	251.72	251.72	4.5	2376	>sp|P02817|AMELX_BOVIN Amelogenin, X isoform OS=Bos taurus OX=9913 GN=AMELX PE=1 SV=2	1	hf1_10472_ebo_34_1_261219.ScanId;v=1;d1=9951.9951.3	controllerType=0 controllerNumber=1 scan=9951	25.0391
09739:2	1	S.MPLPPHPGH.P			491.753	2	982.498	982.493	0	5.8	17	Non	531.96	423.37	423.37	6.91	2376	>sp|P02817|AMELX_BOVIN Amelogenin, X isoform OS=Bos taurus OX=9913 GN=AMELX PE=1 SV=2	1	hf1_10472_ebo_34_1_261219.ScanId;v=1;d1=8788.8788.2	controllerType=0 controllerNumber=1 scan=8788	23.0392
11188:2	1	S.MPLPPHPGH.P			491.752	2	982.496	982.493	0	3.7	17	Non	559.93	426.21	426.21	6.77	2376	>sp|P02817|AMELX_BOVIN Amelogenin, X isoform OS=Bos taurus OX=9913 GN=AMELX PE=1 SV=2	1	hf1_10472_ebo_34_1_261219.ScanId;v=1;d1=9788.9788.2	controllerType=0 controllerNumber=1 scan=9788	24.7575
10875:2	1	S.MPLPPHPGH.P			491.752	2	982.498	982.493	0	5.1	17	Non	592.19	455.79	455.79	7.77	2376	>sp|P02817|AMELX_BOVIN Amelogenin, X isoform OS=Bos taurus OX=9913 GN=AMELX PE=1 SV=2	1	hf1_10472_ebo_34_1_261219.ScanId;v=1;d1=9577.9577.2	controllerType=0 controllerNumber=1 scan=9577	24.4082
10048:2	1	S.MPLPPHPGH.P			491.753	2	982.498	982.493	0	5.2	17	Non	604.25	494.22	494.22	9.39	2376	>sp|P02817|AMELX_BOVIN Amelogenin, X isoform OS=Bos taurus OX=9913 GN=AMELX PE=1 SV=2	1	hf1_10472_ebo_34_1_261219.ScanId;v=1;d1=8995.8995.2	controllerType=0 controllerNumber=1 scan=8995	23.3897
10611:2	1	S.MPLPPHPGH.P			491.752	2	982.497	982.493	0	4.5	17	Non	607.78	447.28	447.28	9.21	2376	>sp|P02817|AMELX_BOVIN Amelogenin, X isoform OS=Bos taurus OX=9913 GN=AMELX PE=1 SV=2	1	hf1_10472_ebo_34_1_261219.ScanId;v=1;d1=9389.9389.2	controllerType=0 controllerNumber=1 scan=9389	24.0708
10343:2	1	S.MPLPPHPGH.P			491.752	2	982.497	982.493	0	4.2	17	Non	616.14	456.18	456.18	9.21	2376	>sp|P02817|AMELX_BOVIN Amelogenin, X isoform OS=Bos taurus OX=9913 GN=AMELX PE=1 SV=2	1	hf1_10472_ebo_34_1_261219.ScanId;v=1;d1=9197.9197.2	controllerType=0 controllerNumber=1 scan=9197	23.7327
05485:2	1	S.M[+15.995]PLPPHPGH.P		M[+16]	499.75	2	998.492	998.488	0	4.2	17	Non	516.32	467.63	99.11	7.27	2376	>sp|P02817|AMELX_BOVIN Amelogenin, X isoform OS=Bos taurus OX=9913 GN=AMELX PE=1 SV=2	1	hf1_10472_ebo_34_1_261219.ScanId;v=1;d1=5815.5815.2	controllerType=0 controllerNumber=1 scan=5815	18.0164
06630:2	1	S.M[+15.995]PLPPHPGH.P		M[+16]	499.75	2	998.492	998.488	0	4.5	17	Non	524.23	434.25	93.01	6.65	2376	>sp|P02817|AMELX_BOVIN Amelogenin, X isoform OS=Bos taurus OX=9913 GN=AMELX PE=1 SV=2	1	hf1_10472_ebo_34_1_261219.ScanId;v=1;d1=6640.6640.2	controllerType=0 controllerNumber=1 scan=6640	19.4184
06336:2	1	S.M[+15.995]PLPPHPGH.P		M[+16]	499.75	2	998.493	998.488	0	5.5	17	Non	527.57	424.7	95.51	6.96	2376	>sp|P02817|AMELX_BOVIN Amelogenin, X isoform OS=Bos taurus OX=9913 GN=AMELX PE=1 SV=2	1	hf1_10472_ebo_34_1_261219.ScanId;v=1;d1=6432.6432.2	controllerType=0 controllerNumber=1 scan=6432	19.0711
06046:2	1	S.M[+15.995]PLPPHPGH.P		M[+16]	499.75	2	998.492	998.488	0	4.3	17	Non	544.25	438.08	106.13	7.4	2376	>sp|P02817|AMELX_BOVIN Amelogenin, X isoform OS=Bos taurus OX=9913 GN=AMELX PE=1 SV=2	1	hf1_10472_ebo_34_1_261219.ScanId;v=1;d1=6225.6225.2	controllerType=0 controllerNumber=1 scan=6225	18.7224
04626:2	1	S.M[+15.995]PLPPHPGH.P		M[+16]	499.75	2	998.493	998.488	0	5.5	17	Non	573.83	497.54	118.14	8.39	2376	>sp|P02817|AMELX_BOVIN Amelogenin, X isoform OS=Bos taurus OX=9913 GN=AMELX PE=1 SV=2	1	hf1_10472_ebo_34_1_261219.ScanId;v=1;d1=5199.5199.2	controllerType=0 controllerNumber=1 scan=5199	16.9907
05755:2	1	S.M[+15.995]PLPPHPGH.P		M[+16]	499.75	2	998.492	998.488	0	4.8	17	Non	576.51	477.82	133.7	8.39	2376	>sp|P02817|AMELX_BOVIN Amelogenin, X isoform OS=Bos taurus OX=9913 GN=AMELX PE=1 SV=2	1	hf1_10472_ebo_34_1_261219.ScanId;v=1;d1=6020.6020.2	controllerType=0 controllerNumber=1 scan=6020	18.3709
04898:2	1	S.M[+15.995]PLPPHPGH.P		M[+16]	499.75	2	998.492	998.488	0	4.5	17	Non	581.07	517.35	112.33	7.59	2376	>sp|P02817|AMELX_BOVIN Amelogenin, X isoform OS=Bos taurus OX=9913 GN=AMELX PE=1 SV=2	1	hf1_10472_ebo_34_1_261219.ScanId;v=1;d1=5401.5401.2	controllerType=0 controllerNumber=1 scan=5401	17.3273
05190:2	1	S.M[+15.995]PLPPHPGH.P		M[+16]	499.75	2	998.493	998.488	0	5.8	17	Non	582.27	526.47	125.76	8.39	2376	>sp|P02817|AMELX_BOVIN Amelogenin, X isoform OS=Bos taurus OX=9913 GN=AMELX PE=1 SV=2	1	hf1_10472_ebo_34_1_261219.ScanId;v=1;d1=5611.5611.2	controllerType=0 controllerNumber=1 scan=5611	17.6758
04700:2	1	S.M[+15.995]PLPPHPGH.P		M[+16]	499.75	2	998.493	998.488	0	5	17	Non	586.35	479.35	118.65	8.39	2376	>sp|P02817|AMELX_BOVIN Amelogenin, X isoform OS=Bos taurus OX=9913 GN=AMELX PE=1 SV=2	1	hf1_10472_ebo_34_1_261219.ScanId;v=1;d1=5250.5250.2	controllerType=0 controllerNumber=1 scan=5250	17.0756
03256:2	1	S.M[+15.995]P[+15.995]LPPHPGH.P		M[+16], P[+16]	507.748	2	1014.49	1014.48	0	5.9	17	Non	129.85	129.85	11.52	0.54	2376	>sp|P02817|AMELX_BOVIN Amelogenin, X isoform OS=Bos taurus OX=9913 GN=AMELX PE=1 SV=2	1	hf1_10472_ebo_34_1_261219.ScanId;v=1;d1=4222.4222.2	controllerType=0 controllerNumber=1 scan=4222	15.3788
04445:2	1	S.M[+15.995]PLPPHP[+15.995]GH.P		M[+16], P[+16]	507.748	2	1014.49	1014.48	0	5.7	17	Non	130.14	130.14	3.9	0.54	2376	>sp|P02817|AMELX_BOVIN Amelogenin, X isoform OS=Bos taurus OX=9913 GN=AMELX PE=1 SV=2	1	hf1_10472_ebo_34_1_261219.ScanId;v=1;d1=5073.5073.2	controllerType=0 controllerNumber=1 scan=5073	16.7791
03708:2	1	S.M[+15.995]PLPP[+15.995]HPGH.P		M[+16], P[+16]	507.748	2	1014.49	1014.48	0	6.2	17	Non	178.03	146.91	1.14	1.11	2376	>sp|P02817|AMELX_BOVIN Amelogenin, X isoform OS=Bos taurus OX=9913 GN=AMELX PE=1 SV=2	1	hf1_10472_ebo_34_1_261219.ScanId;v=1;d1=4537.4537.2	controllerType=0 controllerNumber=1 scan=4537	15.8863
06761:2	1	S.M[+15.995]P[+15.995]LPPHPGH.P		M[+16], P[+16]	507.748	2	1014.49	1014.48	0	6.9	17	Non	279.55	254.22	16.38	3.62	2376	>sp|P02817|AMELX_BOVIN Amelogenin, X isoform OS=Bos taurus OX=9913 GN=AMELX PE=1 SV=2	1	hf1_10472_ebo_34_1_261219.ScanId;v=1;d1=6726.6726.2	controllerType=0 controllerNumber=1 scan=6726	19.5603
12611:2	1	S.MPLPPHPGHP.G			540.279	2	1079.55	1079.55	0	5.4	17	Non	590.31	379.55	379.55	8.39	2376	>sp|P02817|AMELX_BOVIN Amelogenin, X isoform OS=Bos taurus OX=9913 GN=AMELX PE=1 SV=2	1	hf1_10472_ebo_34_1_261219.ScanId;v=1;d1=10750.10750.2	controllerType=0 controllerNumber=1 scan=10750	26.4107
12327:2	1	S.MPLPPHPGHP.G			540.279	2	1079.55	1079.55	0	4.7	17	Non	635.34	393.61	393.61	9.39	2376	>sp|P02817|AMELX_BOVIN Amelogenin, X isoform OS=Bos taurus OX=9913 GN=AMELX PE=1 SV=2	1	hf1_10472_ebo_34_1_261219.ScanId;v=1;d1=10554.10554.2	controllerType=0 controllerNumber=1 scan=10554	26.0694
11671:2	1	S.MPLPPHPGHP.G			540.279	2	1079.55	1079.55	0	5.3	17	Non	670.31	413.26	413.26	10.39	2376	>sp|P02817|AMELX_BOVIN Amelogenin, X isoform OS=Bos taurus OX=9913 GN=AMELX PE=1 SV=2	1	hf1_10472_ebo_34_1_261219.ScanId;v=1;d1=10125.10125.2	controllerType=0 controllerNumber=1 scan=10125	25.3408
12028:2	1	S.MPLPPHPGHP.G			540.279	2	1079.55	1079.55	0	4.5	17	Non	671.22	421.71	421.71	10.21	2376	>sp|P02817|AMELX_BOVIN Amelogenin, X isoform OS=Bos taurus OX=9913 GN=AMELX PE=1 SV=2	1	hf1_10472_ebo_34_1_261219.ScanId;v=1;d1=10355.10355.2	controllerType=0 controllerNumber=1 scan=10355	25.7299
11380:2	1	S.MPLPPHPGHP.G			540.279	2	1079.55	1079.55	0	4.5	17	Non	685.21	433.99	433.99	10.21	2376	>sp|P02817|AMELX_BOVIN Amelogenin, X isoform OS=Bos taurus OX=9913 GN=AMELX PE=1 SV=2	1	hf1_10472_ebo_34_1_261219.ScanId;v=1;d1=9929.9929.2	controllerType=0 controllerNumber=1 scan=9929	25.0007
08178:2	1	S.M[+15.995]PLPPHPGHP.G		M[+16]	548.276	2	1095.55	1095.54	0	4.2	17	Non	213.46	151.23	10.09	2.57	2376	>sp|P02817|AMELX_BOVIN Amelogenin, X isoform OS=Bos taurus OX=9913 GN=AMELX PE=1 SV=2	1	hf1_10472_ebo_34_1_261219.ScanId;v=1;d1=7703.7703.2	controllerType=0 controllerNumber=1 scan=7703	21.1975
06435:2	1	S.M[+15.995]PLPPHPGHP.G		M[+16]	548.277	2	1095.55	1095.54	0	6.3	17	Non	483.6	315.32	60.12	5.6	2376	>sp|P02817|AMELX_BOVIN Amelogenin, X isoform OS=Bos taurus OX=9913 GN=AMELX PE=1 SV=2	1	hf1_10472_ebo_34_1_261219.ScanId;v=1;d1=6501.6501.2	controllerType=0 controllerNumber=1 scan=6501	19.1859
08135:2	1	S.M[+15.995]PLPPHPGHP.G		M[+16]	548.276	2	1095.54	1095.54	0	3.8	17	Non	567.45	353.49	67.02	7.27	2376	>sp|P02817|AMELX_BOVIN Amelogenin, X isoform OS=Bos taurus OX=9913 GN=AMELX PE=1 SV=2	1	hf1_10472_ebo_34_1_261219.ScanId;v=1;d1=7674.7674.2	controllerType=0 controllerNumber=1 scan=7674	21.1487
06938:2	1	S.M[+15.995]PLPPHPGHP.G		M[+16]	548.277	2	1095.55	1095.54	0	6.1	17	Non	602.53	433.51	97.35	9.39	2376	>sp|P02817|AMELX_BOVIN Amelogenin, X isoform OS=Bos taurus OX=9913 GN=AMELX PE=1 SV=2	1	hf1_10472_ebo_34_1_261219.ScanId;v=1;d1=6847.6847.2	controllerType=0 controllerNumber=1 scan=6847	19.7595
07840:2	1	S.M[+15.995]PLPPHPGHP.G		M[+16]	548.277	2	1095.55	1095.54	0	5.9	17	Non	631.87	428.18	90.67	9.39	2376	>sp|P02817|AMELX_BOVIN Amelogenin, X isoform OS=Bos taurus OX=9913 GN=AMELX PE=1 SV=2	1	hf1_10472_ebo_34_1_261219.ScanId;v=1;d1=7470.7470.2	controllerType=0 controllerNumber=1 scan=7470	20.801
07230:2	1	S.M[+15.995]PLPPHPGHP.G		M[+16]	548.277	2	1095.55	1095.54	0	6.2	17	Non	634.06	389.53	80.39	9.39	2376	>sp|P02817|AMELX_BOVIN Amelogenin, X isoform OS=Bos taurus OX=9913 GN=AMELX PE=1 SV=2	1	hf1_10472_ebo_34_1_261219.ScanId;v=1;d1=7052.7052.2	controllerType=0 controllerNumber=1 scan=7052	20.1035
07535:2	1	S.M[+15.995]PLPPHPGHP.G		M[+16]	548.277	2	1095.55	1095.54	0	5.1	17	Non	634.66	425.35	102.03	9.39	2376	>sp|P02817|AMELX_BOVIN Amelogenin, X isoform OS=Bos taurus OX=9913 GN=AMELX PE=1 SV=2	1	hf1_10472_ebo_34_1_261219.ScanId;v=1;d1=7261.7261.2	controllerType=0 controllerNumber=1 scan=7261	20.4522
09599:2	1	S.M[+15.995]PLP[+15.995]PHPGHP.G		M[+16], P[+16]	556.275	2	1111.54	1111.54	0	6.9	17	Non	80.45	80.45	13.36	0.24	2376	>sp|P02817|AMELX_BOVIN Amelogenin, X isoform OS=Bos taurus OX=9913 GN=AMELX PE=1 SV=2	1	hf1_10472_ebo_34_1_261219.ScanId;v=1;d1=8688.8688.2	controllerType=0 controllerNumber=1 scan=8688	22.8673
10758:2	1	S.M[+15.995]PLP[+31.990]PHPGHP.G		M[+16], P[+32]	564.271	2	1127.54	1127.53	0	4.7	17	Non	148.62	148.62	1.12	1.11	2376	>sp|P02817|AMELX_BOVIN Amelogenin, X isoform OS=Bos taurus OX=9913 GN=AMELX PE=1 SV=2	1	hf1_10472_ebo_34_1_261219.ScanId;v=1;d1=9497.9497.2	controllerType=0 controllerNumber=1 scan=9497	24.2653
05979:2	1	S.M[+15.995]PLPPHPGHP[+15.995].G		M[+16], P[+16]	556.274	2	1111.54	1111.54	0	4.5	17	Non	272.93	235.18	2.79	4.66	2376	>sp|P02817|AMELX_BOVIN Amelogenin, X isoform OS=Bos taurus OX=9913 GN=AMELX PE=1 SV=2	1	hf1_10472_ebo_34_1_261219.ScanId;v=1;d1=6179.6179.2	controllerType=0 controllerNumber=1 scan=6179	18.6436
06302:2	1	S.M[+15.995]PLPPHPGHP[+15.995].G		M[+16], P[+16]	556.274	2	1111.54	1111.54	0	4.6	17	Non	357.25	345.21	26.29	5.36	2376	>sp|P02817|AMELX_BOVIN Amelogenin, X isoform OS=Bos taurus OX=9913 GN=AMELX PE=1 SV=2	1	hf1_10472_ebo_34_1_261219.ScanId;v=1;d1=6406.6406.3	controllerType=0 controllerNumber=1 scan=6406	19.0259
50617:3	1	S.MPLPPHPGHPG.Y			379.529	3	1136.57	1136.57	0	5.1	17	Non	97.66	97.66	97.66	1.42	2376	>sp|P02817|AMELX_BOVIN Amelogenin, X isoform OS=Bos taurus OX=9913 GN=AMELX PE=1 SV=2	1	hf1_10472_ebo_34_1_261219.ScanId;v=1;d1=37515.37515.3	controllerType=0 controllerNumber=1 scan=37515	77.0024
50474:3	1	S.MPLPPHPGHPG.Y			379.529	3	1136.57	1136.57	0	4.6	17	Non	156.5	156.5	156.5	2.68	2376	>sp|P02817|AMELX_BOVIN Amelogenin, X isoform OS=Bos taurus OX=9913 GN=AMELX PE=1 SV=2	1	hf1_10472_ebo_34_1_261219.ScanId;v=1;d1=37337.37337.3	controllerType=0 controllerNumber=1 scan=37337	76.3239
50583:3	1	S.MPLPPHPGHPG.Y			379.529	3	1136.57	1136.57	0	4.6	17	Non	223.97	223.97	223.97	3.22	2376	>sp|P02817|AMELX_BOVIN Amelogenin, X isoform OS=Bos taurus OX=9913 GN=AMELX PE=1 SV=2	1	hf1_10472_ebo_34_1_261219.ScanId;v=1;d1=37445.37445.3	controllerType=0 controllerNumber=1 scan=37445	76.6635
48939:3	1	S.MPLPPHPGHPG.Y			379.529	3	1136.57	1136.57	0	3.7	17	Non	238.07	238.07	238.07	4.36	2376	>sp|P02817|AMELX_BOVIN Amelogenin, X isoform OS=Bos taurus OX=9913 GN=AMELX PE=1 SV=2	1	hf1_10472_ebo_34_1_261219.ScanId;v=1;d1=35720.35720.3	controllerType=0 controllerNumber=1 scan=35720	71.2788
49296:3	1	S.MPLPPHPGHPG.Y			379.529	3	1136.57	1136.57	0	4.5	17	Non	270.26	270.26	270.26	4.54	2376	>sp|P02817|AMELX_BOVIN Amelogenin, X isoform OS=Bos taurus OX=9913 GN=AMELX PE=1 SV=2	1	hf1_10472_ebo_34_1_261219.ScanId;v=1;d1=36032.36032.3	controllerType=0 controllerNumber=1 scan=36032	72.0168
48523:3	1	S.MPLPPHPGHPG.Y			379.529	3	1136.57	1136.57	0	4.3	17	Non	272.71	272.71	272.71	4.5	2376	>sp|P02817|AMELX_BOVIN Amelogenin, X isoform OS=Bos taurus OX=9913 GN=AMELX PE=1 SV=2	1	hf1_10472_ebo_34_1_261219.ScanId;v=1;d1=35350.35350.3	controllerType=0 controllerNumber=1 scan=35350	70.3902
10823:2	1	S.MPLPPHPGHPG.Y			568.79	2	1136.57	1136.57	0	5.8	17	Non	285.9	189.77	189.77	4.91	2376	>sp|P02817|AMELX_BOVIN Amelogenin, X isoform OS=Bos taurus OX=9913 GN=AMELX PE=1 SV=2	1	hf1_10472_ebo_34_1_261219.ScanId;v=1;d1=9541.9541.2	controllerType=0 controllerNumber=1 scan=9541	24.3423
47832:3	1	S.MPLPPHPGHPG.Y			379.528	3	1136.57	1136.57	0	3.3	17	Non	299.99	299.99	299.99	5.51	2376	>sp|P02817|AMELX_BOVIN Amelogenin, X isoform OS=Bos taurus OX=9913 GN=AMELX PE=1 SV=2	1	hf1_10472_ebo_34_1_261219.ScanId;v=1;d1=34754.34754.3	controllerType=0 controllerNumber=1 scan=34754	68.9877
49144:3	1	S.MPLPPHPGHPG.Y			379.529	3	1136.57	1136.57	0	4.2	17	Non	321.46	321.46	321.46	5.43	2376	>sp|P02817|AMELX_BOVIN Amelogenin, X isoform OS=Bos taurus OX=9913 GN=AMELX PE=1 SV=2	1	hf1_10472_ebo_34_1_261219.ScanId;v=1;d1=35897.35897.3	controllerType=0 controllerNumber=1 scan=35897	71.6781
49898:3	1	S.MPLPPHPGHPG.Y			379.529	3	1136.57	1136.57	0	5.8	17	Non	339.83	334.38	334.38	5.14	2376	>sp|P02817|AMELX_BOVIN Amelogenin, X isoform OS=Bos taurus OX=9913 GN=AMELX PE=1 SV=2	1	hf1_10472_ebo_34_1_261219.ScanId;v=1;d1=36594.36594.3	controllerType=0 controllerNumber=1 scan=36594	73.4094
11371:2	1	S.MPLPPHPGHPG.Y			568.789	2	1136.57	1136.57	0	4.1	17	Non	356.58	356.58	356.58	5.24	2376	>sp|P02817|AMELX_BOVIN Amelogenin, X isoform OS=Bos taurus OX=9913 GN=AMELX PE=1 SV=2	1	hf1_10472_ebo_34_1_261219.ScanId;v=1;d1=9923.9923.4	controllerType=0 controllerNumber=1 scan=9923	24.9897
09960:3	1	S.MPLPPHPGHPG.Y			379.53	3	1136.57	1136.57	0	6.4	17	Non	370.57	248.48	248.48	4.6	2376	>sp|P02817|AMELX_BOVIN Amelogenin, X isoform OS=Bos taurus OX=9913 GN=AMELX PE=1 SV=2	1	hf1_10472_ebo_34_1_261219.ScanId;v=1;d1=8934.8934.3	controllerType=0 controllerNumber=1 scan=8934	23.2845
48689:3	1	S.MPLPPHPGHPG.Y			379.529	3	1136.57	1136.57	0	4	17	Non	370.58	370.58	370.58	6.7	2376	>sp|P02817|AMELX_BOVIN Amelogenin, X isoform OS=Bos taurus OX=9913 GN=AMELX PE=1 SV=2	1	hf1_10472_ebo_34_1_261219.ScanId;v=1;d1=35497.35497.3	controllerType=0 controllerNumber=1 scan=35497	70.7342
11687:2	1	S.MPLPPHPGHPG.Y			568.787	2	1136.57	1136.57	0	-1	17	Non	413.53	413.53	413.53	5.76	2376	>sp|P02817|AMELX_BOVIN Amelogenin, X isoform OS=Bos taurus OX=9913 GN=AMELX PE=1 SV=2	1	hf1_10472_ebo_34_1_261219.ScanId;v=1;d1=10135.10135.2	controllerType=0 controllerNumber=1 scan=10135	25.3565
11987:3	1	S.MPLPPHPGHPG.Y			379.529	3	1136.57	1136.57	0	4.2	17	Non	430.14	422.58	422.58	6.2	2376	>sp|P02817|AMELX_BOVIN Amelogenin, X isoform OS=Bos taurus OX=9913 GN=AMELX PE=1 SV=2	1	hf1_10472_ebo_34_1_261219.ScanId;v=1;d1=10330.10330.3	controllerType=0 controllerNumber=1 scan=10330	25.688
10257:3	1	S.MPLPPHPGHPG.Y			379.529	3	1136.57	1136.57	0	5.1	17	Non	494.18	478.06	478.06	7.07	2376	>sp|P02817|AMELX_BOVIN Amelogenin, X isoform OS=Bos taurus OX=9913 GN=AMELX PE=1 SV=2	1	hf1_10472_ebo_34_1_261219.ScanId;v=1;d1=9142.9142.3	controllerType=0 controllerNumber=1 scan=9142	23.639
10808:3	1	S.MPLPPHPGHPG.Y			379.53	3	1136.58	1136.57	0	7.1	17	Non	494.36	423.08	423.08	7.12	2376	>sp|P02817|AMELX_BOVIN Amelogenin, X isoform OS=Bos taurus OX=9913 GN=AMELX PE=1 SV=2	1	hf1_10472_ebo_34_1_261219.ScanId;v=1;d1=9530.9530.3	controllerType=0 controllerNumber=1 scan=9530	24.321
11672:3	1	S.MPLPPHPGHPG.Y			379.529	3	1136.57	1136.57	0	5	17	Non	498.38	478.04	478.04	7.07	2376	>sp|P02817|AMELX_BOVIN Amelogenin, X isoform OS=Bos taurus OX=9913 GN=AMELX PE=1 SV=2	1	hf1_10472_ebo_34_1_261219.ScanId;v=1;d1=10126.10126.3	controllerType=0 controllerNumber=1 scan=10126	25.3415
10544:3	1	S.MPLPPHPGHPG.Y			379.53	3	1136.57	1136.57	0	6.3	17	Non	509.99	456.15	456.15	7.07	2376	>sp|P02817|AMELX_BOVIN Amelogenin, X isoform OS=Bos taurus OX=9913 GN=AMELX PE=1 SV=2	1	hf1_10472_ebo_34_1_261219.ScanId;v=1;d1=9338.9338.3	controllerType=0 controllerNumber=1 scan=9338	23.9791
11103:3	1	S.MPLPPHPGHPG.Y			379.528	3	1136.57	1136.57	0	3	17	Non	511.41	493.41	493.41	6.89	2376	>sp|P02817|AMELX_BOVIN Amelogenin, X isoform OS=Bos taurus OX=9913 GN=AMELX PE=1 SV=2	1	hf1_10472_ebo_34_1_261219.ScanId;v=1;d1=9729.9729.3	controllerType=0 controllerNumber=1 scan=9729	24.6585
11373:3	1	S.MPLPPHPGHPG.Y			379.529	3	1136.57	1136.57	0	4.5	17	Non	515.33	501.45	501.45	6.89	2376	>sp|P02817|AMELX_BOVIN Amelogenin, X isoform OS=Bos taurus OX=9913 GN=AMELX PE=1 SV=2	1	hf1_10472_ebo_34_1_261219.ScanId;v=1;d1=9925.9925.3	controllerType=0 controllerNumber=1 scan=9925	24.9954
11139:2	1	S.MPLPPHPGHPG.Y			568.789	2	1136.57	1136.57	0	3.4	17	Non	655.99	565.36	565.36	10.21	2376	>sp|P02817|AMELX_BOVIN Amelogenin, X isoform OS=Bos taurus OX=9913 GN=AMELX PE=1 SV=2	1	hf1_10472_ebo_34_1_261219.ScanId;v=1;d1=9754.9754.2	controllerType=0 controllerNumber=1 scan=9754	24.6989
10073:2	1	S.MPLPPHPGHPG.Y			568.789	2	1136.57	1136.57	0	4.2	17	Non	671.17	594.63	594.63	10.21	2376	>sp|P02817|AMELX_BOVIN Amelogenin, X isoform OS=Bos taurus OX=9913 GN=AMELX PE=1 SV=2	1	hf1_10472_ebo_34_1_261219.ScanId;v=1;d1=9010.9010.2	controllerType=0 controllerNumber=1 scan=9010	23.4127
10377:2	1	S.MPLPPHPGHPG.Y			568.79	2	1136.57	1136.57	0	4.5	17	Non	693.39	644.66	644.66	10.21	2376	>sp|P02817|AMELX_BOVIN Amelogenin, X isoform OS=Bos taurus OX=9913 GN=AMELX PE=1 SV=2	1	hf1_10472_ebo_34_1_261219.ScanId;v=1;d1=9219.9219.2	controllerType=0 controllerNumber=1 scan=9219	23.7701
10641:2	1	S.MPLPPHPGHPG.Y			568.79	2	1136.57	1136.57	0	4.5	17	Non	697.25	623.87	623.87	10.21	2376	>sp|P02817|AMELX_BOVIN Amelogenin, X isoform OS=Bos taurus OX=9913 GN=AMELX PE=1 SV=2	1	hf1_10472_ebo_34_1_261219.ScanId;v=1;d1=9413.9413.2	controllerType=0 controllerNumber=1 scan=9413	24.1143
00563:3	1	S.MP[+15.995]LPPHPGHPG.Y		P[+16]	384.86	3	1152.57	1152.56	0	3.7	17	Non	11.99	11.99	4	0.46	2376	>sp|P02817|AMELX_BOVIN Amelogenin, X isoform OS=Bos taurus OX=9913 GN=AMELX PE=1 SV=2	1	hf1_10472_ebo_34_1_261219.ScanId;v=1;d1=2293.2293.3	controllerType=0 controllerNumber=1 scan=2293	12.1741
00243:3	1	S.MP[+15.995]LPPHPGHPG.Y		P[+16]	384.86	3	1152.56	1152.56	0	2.5	17	Non	19.84	19.84	4	0.55	2376	>sp|P02817|AMELX_BOVIN Amelogenin, X isoform OS=Bos taurus OX=9913 GN=AMELX PE=1 SV=2	1	hf1_10472_ebo_34_1_261219.ScanId;v=1;d1=1760.1760.3	controllerType=0 controllerNumber=1 scan=1760	9.7932
00214:3	1	S.MP[+15.995]LPPHPGHPG.Y		P[+16]	384.86	3	1152.57	1152.56	0	3.1	17	Non	27.98	27.98	4	0.73	2376	>sp|P02817|AMELX_BOVIN Amelogenin, X isoform OS=Bos taurus OX=9913 GN=AMELX PE=1 SV=2	1	hf1_10472_ebo_34_1_261219.ScanId;v=1;d1=1691.1691.3	controllerType=0 controllerNumber=1 scan=1691	9.4534
49547:3	1	S.MP[+15.995]LPPHPGHPG.Y		P[+16]	384.86	3	1152.57	1152.56	0	3.7	17	Non	28.18	28.18	4	0.46	2376	>sp|P02817|AMELX_BOVIN Amelogenin, X isoform OS=Bos taurus OX=9913 GN=AMELX PE=1 SV=2	1	hf1_10472_ebo_34_1_261219.ScanId;v=1;d1=36267.36267.3	controllerType=0 controllerNumber=1 scan=36267	72.5774
00452:3	1	S.MP[+15.995]LPPHPGHPG.Y		P[+16]	384.86	3	1152.57	1152.56	0	3.1	17	Non	30.47	30.47	4	0.73	2376	>sp|P02817|AMELX_BOVIN Amelogenin, X isoform OS=Bos taurus OX=9913 GN=AMELX PE=1 SV=2	1	hf1_10472_ebo_34_1_261219.ScanId;v=1;d1=2131.2131.3	controllerType=0 controllerNumber=1 scan=2131	11.4936
00391:3	1	S.MP[+15.995]LPPHPGHPG.Y		P[+16]	384.86	3	1152.57	1152.56	0	2.8	17	Non	51.74	51.74	4	1.08	2376	>sp|P02817|AMELX_BOVIN Amelogenin, X isoform OS=Bos taurus OX=9913 GN=AMELX PE=1 SV=2	1	hf1_10472_ebo_34_1_261219.ScanId;v=1;d1=1992.1992.3	controllerType=0 controllerNumber=1 scan=1992	10.8096
00488:3	1	S.MP[+15.995]LPPHPGHPG.Y		P[+16]	384.86	3	1152.57	1152.56	0	2.9	17	Non	51.9	51.9	4	1.08	2376	>sp|P02817|AMELX_BOVIN Amelogenin, X isoform OS=Bos taurus OX=9913 GN=AMELX PE=1 SV=2	1	hf1_10472_ebo_34_1_261219.ScanId;v=1;d1=2203.2203.3	controllerType=0 controllerNumber=1 scan=2203	11.8351
00332:3	1	S.MP[+15.995]LPPHPGHPG.Y		P[+16]	384.86	3	1152.56	1152.56	0	2.4	17	Non	56.82	56.82	4	0.81	2376	>sp|P02817|AMELX_BOVIN Amelogenin, X isoform OS=Bos taurus OX=9913 GN=AMELX PE=1 SV=2	1	hf1_10472_ebo_34_1_261219.ScanId;v=1;d1=1911.1911.3	controllerType=0 controllerNumber=1 scan=1911	10.4715
06208:2	1	S.MP[+15.995]LPPHPGHPG.Y		P[+16]	576.788	2	1152.57	1152.56	0	5.1	17	Non	67.77	67.77	4	0.5	2376	>sp|P02817|AMELX_BOVIN Amelogenin, X isoform OS=Bos taurus OX=9913 GN=AMELX PE=1 SV=2	1	hf1_10472_ebo_34_1_261219.ScanId;v=1;d1=6336.6336.2	controllerType=0 controllerNumber=1 scan=6336	18.9091
48451:3	1	S.MP[+15.995]LPPHPGHPG.Y		P[+16]	384.86	3	1152.57	1152.56	0	2.8	17	Non	69.27	69.27	4	1.08	2376	>sp|P02817|AMELX_BOVIN Amelogenin, X isoform OS=Bos taurus OX=9913 GN=AMELX PE=1 SV=2	1	hf1_10472_ebo_34_1_261219.ScanId;v=1;d1=35296.35296.3	controllerType=0 controllerNumber=1 scan=35296	70.273
00277:3	1	S.MP[+15.995]LPPHPGHPG.Y		P[+16]	384.86	3	1152.56	1152.56	0	2.5	17	Non	91.11	91.11	4	0.96	2376	>sp|P02817|AMELX_BOVIN Amelogenin, X isoform OS=Bos taurus OX=9913 GN=AMELX PE=1 SV=2	1	hf1_10472_ebo_34_1_261219.ScanId;v=1;d1=1831.1831.3	controllerType=0 controllerNumber=1 scan=1831	10.1343
07237:2	1	S.M[+31.990]PLPPHPGHPG.Y		M[+32]	584.786	2	1168.56	1168.56	0	6.1	17	Non	101.32	101.32	5.7	0.54	2376	>sp|P02817|AMELX_BOVIN Amelogenin, X isoform OS=Bos taurus OX=9913 GN=AMELX PE=1 SV=2	1	hf1_10472_ebo_34_1_261219.ScanId;v=1;d1=7056.7056.3	controllerType=0 controllerNumber=1 scan=7056	20.1091
48856:3	1	S.MP[+15.995]LPPHPGHPG.Y		P[+16]	384.861	3	1152.57	1152.56	0	4.5	17	Non	105.91	105.91	4	1.25	2376	>sp|P02817|AMELX_BOVIN Amelogenin, X isoform OS=Bos taurus OX=9913 GN=AMELX PE=1 SV=2	1	hf1_10472_ebo_34_1_261219.ScanId;v=1;d1=35649.35649.3	controllerType=0 controllerNumber=1 scan=35649	71.1127
12228:3	1	S.MP[+15.995]LPPHPGHPG.Y		P[+16]	384.861	3	1152.57	1152.56	0	4.5	17	Non	107.63	107.63	13.8	0.34	2376	>sp|P02817|AMELX_BOVIN Amelogenin, X isoform OS=Bos taurus OX=9913 GN=AMELX PE=1 SV=2	1	hf1_10472_ebo_34_1_261219.ScanId;v=1;d1=10485.10485.3	controllerType=0 controllerNumber=1 scan=10485	25.9498
00420:3	1	S.M[+15.995]PLPPHPGHPG.Y		M[+16]	384.86	3	1152.56	1152.56	0	2.7	17	Non	122.22	122.22	25.32	1.19	2376	>sp|P02817|AMELX_BOVIN Amelogenin, X isoform OS=Bos taurus OX=9913 GN=AMELX PE=1 SV=2	1	hf1_10472_ebo_34_1_261219.ScanId;v=1;d1=2062.2062.3	controllerType=0 controllerNumber=1 scan=2062	11.1552
49201:3	1	S.MP[+15.995]LPPHPGHPG.Y		P[+16]	384.86	3	1152.57	1152.56	0	3.5	17	Non	122.36	122.36	4	1.26	2376	>sp|P02817|AMELX_BOVIN Amelogenin, X isoform OS=Bos taurus OX=9913 GN=AMELX PE=1 SV=2	1	hf1_10472_ebo_34_1_261219.ScanId;v=1;d1=35951.35951.3	controllerType=0 controllerNumber=1 scan=35951	71.8087
00012:3	1	S.M[+15.995]PLPPHPGHPG.Y		M[+16]	384.861	3	1152.57	1152.56	0	5	17	Non	126.29	126.29	26.97	1.28	2376	>sp|P02817|AMELX_BOVIN Amelogenin, X isoform OS=Bos taurus OX=9913 GN=AMELX PE=1 SV=2	1	hf1_10472_ebo_34_1_261219.ScanId;v=1;d1=109.109.3	controllerType=0 controllerNumber=1 scan=109	0.5466
11452:3	1	S.M[+15.995]PLPPHPGHPG.Y		M[+16]	384.861	3	1152.57	1152.56	0	4.6	17	Non	179.22	179.22	7.48	2.42	2376	>sp|P02817|AMELX_BOVIN Amelogenin, X isoform OS=Bos taurus OX=9913 GN=AMELX PE=1 SV=2	1	hf1_10472_ebo_34_1_261219.ScanId;v=1;d1=9975.9975.3	controllerType=0 controllerNumber=1 scan=9975	25.0791
11018:3	1	S.MP[+15.995]LPPHPGHPG.Y		P[+16]	384.861	3	1152.57	1152.56	0	4.4	17	Non	201.47	173.72	5.8	2.37	2376	>sp|P02817|AMELX_BOVIN Amelogenin, X isoform OS=Bos taurus OX=9913 GN=AMELX PE=1 SV=2	1	hf1_10472_ebo_34_1_261219.ScanId;v=1;d1=9670.9670.2	controllerType=0 controllerNumber=1 scan=9670	24.5612
10842:3	1	S.M[+15.995]PLPPHPGHPG.Y		M[+16]	384.86	3	1152.57	1152.56	0	3.1	17	Non	270.29	233.17	9.08	3.73	2376	>sp|P02817|AMELX_BOVIN Amelogenin, X isoform OS=Bos taurus OX=9913 GN=AMELX PE=1 SV=2	1	hf1_10472_ebo_34_1_261219.ScanId;v=1;d1=9554.9554.3	controllerType=0 controllerNumber=1 scan=9554	24.367
10413:3	1	S.MPLP[+15.995]PHPGHPG.Y		P[+16]	384.86	3	1152.57	1152.56	0	3.5	17	Non	284.3	158.3	0.17	3.37	2376	>sp|P02817|AMELX_BOVIN Amelogenin, X isoform OS=Bos taurus OX=9913 GN=AMELX PE=1 SV=2	1	hf1_10472_ebo_34_1_261219.ScanId;v=1;d1=9245.9245.3	controllerType=0 controllerNumber=1 scan=9245	23.811
07683:3	1	S.M[+31.990]PLPPHPGHPG.Y		M[+32]	390.192	3	1168.56	1168.56	0	5.4	17	Non	308.21	239.78	8.25	4.46	2376	>sp|P02817|AMELX_BOVIN Amelogenin, X isoform OS=Bos taurus OX=9913 GN=AMELX PE=1 SV=2	1	hf1_10472_ebo_34_1_261219.ScanId;v=1;d1=7364.7364.3	controllerType=0 controllerNumber=1 scan=7364	20.6231
11153:3	1	S.M[+15.995]PLPPHPGHPG.Y		M[+16]	384.86	3	1152.57	1152.56	0	3.5	17	Non	312.13	312.13	12.32	4.47	2376	>sp|P02817|AMELX_BOVIN Amelogenin, X isoform OS=Bos taurus OX=9913 GN=AMELX PE=1 SV=2	1	hf1_10472_ebo_34_1_261219.ScanId;v=1;d1=9763.9763.3	controllerType=0 controllerNumber=1 scan=9763	24.7141
07744:3	1	S.M[+31.990]PLPPHPGHPG.Y		M[+32]	390.192	3	1168.56	1168.56	0	5.4	17	Non	320.76	270.82	9.32	4.52	2376	>sp|P02817|AMELX_BOVIN Amelogenin, X isoform OS=Bos taurus OX=9913 GN=AMELX PE=1 SV=2	1	hf1_10472_ebo_34_1_261219.ScanId;v=1;d1=7406.7406.3	controllerType=0 controllerNumber=1 scan=7406	20.6928
08943:2	1	S.MPLPPH[+15.995]PGHPG.Y		H[+16]	576.788	2	1152.57	1152.56	0	5.1	17	Non	334.71	206.62	3.46	4.2	2376	>sp|P02817|AMELX_BOVIN Amelogenin, X isoform OS=Bos taurus OX=9913 GN=AMELX PE=1 SV=2	1	hf1_10472_ebo_34_1_261219.ScanId;v=1;d1=8231.8231.2	controllerType=0 controllerNumber=1 scan=8231	22.089
09402:2	1	S.MPLPPH[+15.995]PGHPG.Y		H[+16]	576.787	2	1152.57	1152.56	0	4.7	17	Non	350.37	325.81	8.58	5.21	2376	>sp|P02817|AMELX_BOVIN Amelogenin, X isoform OS=Bos taurus OX=9913 GN=AMELX PE=1 SV=2	1	hf1_10472_ebo_34_1_261219.ScanId;v=1;d1=8554.8554.3	controllerType=0 controllerNumber=1 scan=8554	22.6384
07143:3	1	S.M[+31.990]PLPPHPGHPG.Y		M[+32]	390.193	3	1168.56	1168.56	0	6.4	17	Non	357.7	325.31	10.1	4.83	2376	>sp|P02817|AMELX_BOVIN Amelogenin, X isoform OS=Bos taurus OX=9913 GN=AMELX PE=1 SV=2	1	hf1_10472_ebo_34_1_261219.ScanId;v=1;d1=6991.6991.2	controllerType=0 controllerNumber=1 scan=6991	19.9992
05411:3	1	S.M[+15.995]PLPPHPGHPG.Y		M[+16]	384.861	3	1152.57	1152.56	0	4.3	17	Non	367.66	318.6	32.46	5.6	2376	>sp|P02817|AMELX_BOVIN Amelogenin, X isoform OS=Bos taurus OX=9913 GN=AMELX PE=1 SV=2	1	hf1_10472_ebo_34_1_261219.ScanId;v=1;d1=5767.5767.3	controllerType=0 controllerNumber=1 scan=5767	17.9333
10116:3	1	S.MPLPPHP[+15.995]GHPG.Y		P[+16]	384.861	3	1152.57	1152.56	0	5	17	Non	372.65	252.66	2.41	4.6	2376	>sp|P02817|AMELX_BOVIN Amelogenin, X isoform OS=Bos taurus OX=9913 GN=AMELX PE=1 SV=2	1	hf1_10472_ebo_34_1_261219.ScanId;v=1;d1=9042.9042.3	controllerType=0 controllerNumber=1 scan=9042	23.4649
09316:2	1	S.MPLPPHPGHP[+15.995]G.Y		P[+16]	576.788	2	1152.57	1152.56	0	5.5	17	Non	398.36	195.75	56.17	4.4	2376	>sp|P02817|AMELX_BOVIN Amelogenin, X isoform OS=Bos taurus OX=9913 GN=AMELX PE=1 SV=2	1	hf1_10472_ebo_34_1_261219.ScanId;v=1;d1=8493.8493.3	controllerType=0 controllerNumber=1 scan=8493	22.533
08646:3	1	S.M[+15.995]PLPPHPGHPG.Y		M[+16]	384.861	3	1152.57	1152.56	0	4.6	17	Non	403.49	333.89	28.74	4.89	2376	>sp|P02817|AMELX_BOVIN Amelogenin, X isoform OS=Bos taurus OX=9913 GN=AMELX PE=1 SV=2	1	hf1_10472_ebo_34_1_261219.ScanId;v=1;d1=8023.8023.3	controllerType=0 controllerNumber=1 scan=8023	21.7358
08204:2	1	S.M[+15.995]PLPPHPGHPG.Y		M[+16]	576.787	2	1152.57	1152.56	0	3.7	17	Non	406.77	400.22	58.26	6.49	2376	>sp|P02817|AMELX_BOVIN Amelogenin, X isoform OS=Bos taurus OX=9913 GN=AMELX PE=1 SV=2	1	hf1_10472_ebo_34_1_261219.ScanId;v=1;d1=7721.7721.2	controllerType=0 controllerNumber=1 scan=7721	21.2274
08934:3	1	S.MPLPPHPGH[+15.995]PG.Y		H[+16]	384.861	3	1152.57	1152.56	0	5	17	Non	410.36	322.37	0.87	5.2	2376	>sp|P02817|AMELX_BOVIN Amelogenin, X isoform OS=Bos taurus OX=9913 GN=AMELX PE=1 SV=2	1	hf1_10472_ebo_34_1_261219.ScanId;v=1;d1=8225.8225.3	controllerType=0 controllerNumber=1 scan=8225	22.0801
00139:3	1	S.M[+15.995]PLPPHPGHPG.Y		M[+16]	384.86	3	1152.56	1152.56	0	2.3	17	Non	417.03	417.03	35.77	6.3	2376	>sp|P02817|AMELX_BOVIN Amelogenin, X isoform OS=Bos taurus OX=9913 GN=AMELX PE=1 SV=2	1	hf1_10472_ebo_34_1_261219.ScanId;v=1;d1=628.628.3	controllerType=0 controllerNumber=1 scan=628	3.3229
05678:3	1	S.M[+15.995]PLPPHPGHPG.Y		M[+16]	384.861	3	1152.57	1152.56	0	5	17	Non	420.31	363.03	35.41	6.06	2376	>sp|P02817|AMELX_BOVIN Amelogenin, X isoform OS=Bos taurus OX=9913 GN=AMELX PE=1 SV=2	1	hf1_10472_ebo_34_1_261219.ScanId;v=1;d1=5965.5965.3	controllerType=0 controllerNumber=1 scan=5965	18.28
09810:3	1	S.MPLPPHPGHP[+15.995]G.Y		P[+16]	384.861	3	1152.57	1152.56	0	5.9	17	Non	426.06	340.29	6.16	5.39	2376	>sp|P02817|AMELX_BOVIN Amelogenin, X isoform OS=Bos taurus OX=9913 GN=AMELX PE=1 SV=2	1	hf1_10472_ebo_34_1_261219.ScanId;v=1;d1=8834.8834.3	controllerType=0 controllerNumber=1 scan=8834	23.1135
07438:3	1	S.M[+31.990]PLPPHPGHPG.Y		M[+32]	390.193	3	1168.56	1168.56	0	5.8	17	Non	427.59	358.1	14.42	5.39	2376	>sp|P02817|AMELX_BOVIN Amelogenin, X isoform OS=Bos taurus OX=9913 GN=AMELX PE=1 SV=2	1	hf1_10472_ebo_34_1_261219.ScanId;v=1;d1=7197.7197.3	controllerType=0 controllerNumber=1 scan=7197	20.3446
06256:3	1	S.M[+15.995]PLPPHPGHPG.Y		M[+16]	384.861	3	1152.57	1152.56	0	6.9	17	Non	431.1	371.79	37.3	7.05	2376	>sp|P02817|AMELX_BOVIN Amelogenin, X isoform OS=Bos taurus OX=9913 GN=AMELX PE=1 SV=2	1	hf1_10472_ebo_34_1_261219.ScanId;v=1;d1=6370.6370.3	controllerType=0 controllerNumber=1 scan=6370	18.9696
09523:3	1	S.MPLPPHPGHP[+15.995]G.Y		P[+16]	384.861	3	1152.57	1152.56	0	5.4	17	Non	432.7	303.47	9.38	5.28	2376	>sp|P02817|AMELX_BOVIN Amelogenin, X isoform OS=Bos taurus OX=9913 GN=AMELX PE=1 SV=2	1	hf1_10472_ebo_34_1_261219.ScanId;v=1;d1=8632.8632.3	controllerType=0 controllerNumber=1 scan=8632	22.767
08336:3	1	S.M[+15.995]PLPPHPGHPG.Y		M[+16]	384.86	3	1152.57	1152.56	0	4.3	17	Non	439.86	376.61	18.68	6.15	2376	>sp|P02817|AMELX_BOVIN Amelogenin, X isoform OS=Bos taurus OX=9913 GN=AMELX PE=1 SV=2	1	hf1_10472_ebo_34_1_261219.ScanId;v=1;d1=7813.7813.3	controllerType=0 controllerNumber=1 scan=7813	21.3832
07741:3	1	S.M[+15.995]PLPPHPGHPG.Y		M[+16]	384.861	3	1152.57	1152.56	0	5.2	17	Non	441.41	375.3	36.16	7	2376	>sp|P02817|AMELX_BOVIN Amelogenin, X isoform OS=Bos taurus OX=9913 GN=AMELX PE=1 SV=2	1	hf1_10472_ebo_34_1_261219.ScanId;v=1;d1=7404.7404.3	controllerType=0 controllerNumber=1 scan=7404	20.6907
05970:3	1	S.M[+15.995]PLPPHPGHPG.Y		M[+16]	384.861	3	1152.57	1152.56	0	6.5	17	Non	450.12	391.82	35.88	7.05	2376	>sp|P02817|AMELX_BOVIN Amelogenin, X isoform OS=Bos taurus OX=9913 GN=AMELX PE=1 SV=2	1	hf1_10472_ebo_34_1_261219.ScanId;v=1;d1=6172.6172.3	controllerType=0 controllerNumber=1 scan=6172	18.6318
50004:3	1	S.M[+15.995]PLPPHPGHPG.Y		M[+16]	384.862	3	1152.57	1152.56	0	9.3	17	Non	450.64	387.67	49.1	6.18	2376	>sp|P02817|AMELX_BOVIN Amelogenin, X isoform OS=Bos taurus OX=9913 GN=AMELX PE=1 SV=2	1	hf1_10472_ebo_34_1_261219.ScanId;v=1;d1=36667.36667.3	controllerType=0 controllerNumber=1 scan=36667	73.5385
07134:3	1	S.M[+15.995]PLPPHPGHPG.Y		M[+16]	384.861	3	1152.57	1152.56	0	5.4	17	Non	451.39	385.39	37.86	7	2376	>sp|P02817|AMELX_BOVIN Amelogenin, X isoform OS=Bos taurus OX=9913 GN=AMELX PE=1 SV=2	1	hf1_10472_ebo_34_1_261219.ScanId;v=1;d1=6986.6986.3	controllerType=0 controllerNumber=1 scan=6986	19.9926
09218:3	1	S.MPLPPHPGHP[+15.995]G.Y		P[+16]	384.861	3	1152.57	1152.56	0	4.6	17	Non	452.14	427.86	11.23	6.2	2376	>sp|P02817|AMELX_BOVIN Amelogenin, X isoform OS=Bos taurus OX=9913 GN=AMELX PE=1 SV=2	1	hf1_10472_ebo_34_1_261219.ScanId;v=1;d1=8428.8428.3	controllerType=0 controllerNumber=1 scan=8428	22.4224
06846:3	1	S.M[+15.995]PLPPHPGHPG.Y		M[+16]	384.861	3	1152.57	1152.56	0	6.5	17	Non	460.18	405.07	37.37	7.03	2376	>sp|P02817|AMELX_BOVIN Amelogenin, X isoform OS=Bos taurus OX=9913 GN=AMELX PE=1 SV=2	1	hf1_10472_ebo_34_1_261219.ScanId;v=1;d1=6783.6783.3	controllerType=0 controllerNumber=1 scan=6783	19.6539
09561:2	1	S.MPLPPHPGHP[+15.995]G.Y		P[+16]	576.788	2	1152.57	1152.56	0	6	17	Non	460.45	324.75	63.94	5.36	2376	>sp|P02817|AMELX_BOVIN Amelogenin, X isoform OS=Bos taurus OX=9913 GN=AMELX PE=1 SV=2	1	hf1_10472_ebo_34_1_261219.ScanId;v=1;d1=8662.8662.2	controllerType=0 controllerNumber=1 scan=8662	22.8202
08037:3	1	S.M[+15.995]PLPPHPGHPG.Y		M[+16]	384.86	3	1152.57	1152.56	0	3.9	17	Non	462.86	389.1	34.29	6.79	2376	>sp|P02817|AMELX_BOVIN Amelogenin, X isoform OS=Bos taurus OX=9913 GN=AMELX PE=1 SV=2	1	hf1_10472_ebo_34_1_261219.ScanId;v=1;d1=7605.7605.3	controllerType=0 controllerNumber=1 scan=7605	21.0301
49967:2	1	S.M[+15.995]PLPPHPGHPG.Y		M[+16]	576.789	2	1152.57	1152.56	0	7.5	17	Non	478.81	394.43	29.42	6.74	2376	>sp|P02817|AMELX_BOVIN Amelogenin, X isoform OS=Bos taurus OX=9913 GN=AMELX PE=1 SV=2	1	hf1_10472_ebo_34_1_261219.ScanId;v=1;d1=36640.36640.2	controllerType=0 controllerNumber=1 scan=36640	73.4892
07436:3	1	S.M[+15.995]PLPPHPGHPG.Y		M[+16]	384.861	3	1152.57	1152.56	0	6.1	17	Non	494.75	438.28	44.73	7.07	2376	>sp|P02817|AMELX_BOVIN Amelogenin, X isoform OS=Bos taurus OX=9913 GN=AMELX PE=1 SV=2	1	hf1_10472_ebo_34_1_261219.ScanId;v=1;d1=7195.7195.3	controllerType=0 controllerNumber=1 scan=7195	20.3427
06537:3	1	S.M[+15.995]PLPPHPGHPG.Y		M[+16]	384.861	3	1152.57	1152.56	0	6.9	17	Non	497.48	469.07	50.03	7.12	2376	>sp|P02817|AMELX_BOVIN Amelogenin, X isoform OS=Bos taurus OX=9913 GN=AMELX PE=1 SV=2	1	hf1_10472_ebo_34_1_261219.ScanId;v=1;d1=6574.6574.3	controllerType=0 controllerNumber=1 scan=6574	19.3091
05413:2	1	S.M[+15.995]PLPPHPGHPG.Y		M[+16]	576.787	2	1152.57	1152.56	0	3.4	17	Non	497.64	461.08	69.41	7.27	2376	>sp|P02817|AMELX_BOVIN Amelogenin, X isoform OS=Bos taurus OX=9913 GN=AMELX PE=1 SV=2	1	hf1_10472_ebo_34_1_261219.ScanId;v=1;d1=5768.5768.2	controllerType=0 controllerNumber=1 scan=5768	17.9343
07758:2	1	S.M[+15.995]PLPPHPGHPG.Y		M[+16]	576.788	2	1152.57	1152.56	0	5.1	17	Non	510.2	394	90.2	6.83	2376	>sp|P02817|AMELX_BOVIN Amelogenin, X isoform OS=Bos taurus OX=9913 GN=AMELX PE=1 SV=2	1	hf1_10472_ebo_34_1_261219.ScanId;v=1;d1=7416.7416.2	controllerType=0 controllerNumber=1 scan=7416	20.7089
05971:2	1	S.M[+15.995]PLPPHPGHPG.Y		M[+16]	576.788	2	1152.57	1152.56	0	5.1	17	Non	591.83	495.41	59.84	8.39	2376	>sp|P02817|AMELX_BOVIN Amelogenin, X isoform OS=Bos taurus OX=9913 GN=AMELX PE=1 SV=2	1	hf1_10472_ebo_34_1_261219.ScanId;v=1;d1=6173.6173.2	controllerType=0 controllerNumber=1 scan=6173	18.6325
07152:2	1	S.M[+15.995]PLPPHPGHPG.Y		M[+16]	576.788	2	1152.57	1152.56	0	5.3	17	Non	610.98	521.96	92.91	9.39	2376	>sp|P02817|AMELX_BOVIN Amelogenin, X isoform OS=Bos taurus OX=9913 GN=AMELX PE=1 SV=2	1	hf1_10472_ebo_34_1_261219.ScanId;v=1;d1=6997.6997.2	controllerType=0 controllerNumber=1 scan=6997	20.011
06851:2	1	S.M[+15.995]PLPPHPGHPG.Y		M[+16]	576.788	2	1152.57	1152.56	0	5.3	17	Non	616.12	506.93	90.84	9.39	2376	>sp|P02817|AMELX_BOVIN Amelogenin, X isoform OS=Bos taurus OX=9913 GN=AMELX PE=1 SV=2	1	hf1_10472_ebo_34_1_261219.ScanId;v=1;d1=6788.6788.2	controllerType=0 controllerNumber=1 scan=6788	19.6642
06551:2	1	S.M[+15.995]PLPPHPGHPG.Y		M[+16]	576.788	2	1152.57	1152.56	0	5.7	17	Non	620.09	518	96.06	9.39	2376	>sp|P02817|AMELX_BOVIN Amelogenin, X isoform OS=Bos taurus OX=9913 GN=AMELX PE=1 SV=2	1	hf1_10472_ebo_34_1_261219.ScanId;v=1;d1=6585.6585.2	controllerType=0 controllerNumber=1 scan=6585	19.3275
05680:2	1	S.M[+15.995]PLPPHPGHPG.Y		M[+16]	576.787	2	1152.57	1152.56	0	4.1	17	Non	620.1	594.07	108.28	9.21	2376	>sp|P02817|AMELX_BOVIN Amelogenin, X isoform OS=Bos taurus OX=9913 GN=AMELX PE=1 SV=2	1	hf1_10472_ebo_34_1_261219.ScanId;v=1;d1=5967.5967.2	controllerType=0 controllerNumber=1 scan=5967	18.2813
07452:2	1	S.M[+15.995]PLPPHPGHPG.Y		M[+16]	576.788	2	1152.57	1152.56	0	5	17	Non	620.26	461.05	99.13	8.77	2376	>sp|P02817|AMELX_BOVIN Amelogenin, X isoform OS=Bos taurus OX=9913 GN=AMELX PE=1 SV=2	1	hf1_10472_ebo_34_1_261219.ScanId;v=1;d1=7206.7206.2	controllerType=0 controllerNumber=1 scan=7206	20.359
06264:2	1	S.M[+15.995]PLPPHPGHPG.Y		M[+16]	576.788	2	1152.57	1152.56	0	5	17	Non	656.6	551.95	96.08	10.39	2376	>sp|P02817|AMELX_BOVIN Amelogenin, X isoform OS=Bos taurus OX=9913 GN=AMELX PE=1 SV=2	1	hf1_10472_ebo_34_1_261219.ScanId;v=1;d1=6376.6376.2	controllerType=0 controllerNumber=1 scan=6376	18.9799
05424:2	1	S.M[+15.995]PLPPHPGHP[+15.995]G.Y		M[+16], P[+16]	584.784	2	1168.56	1168.56	0	3.8	17	Non	120.91	120.91	3.31	0.49	2376	>sp|P02817|AMELX_BOVIN Amelogenin, X isoform OS=Bos taurus OX=9913 GN=AMELX PE=1 SV=2	1	hf1_10472_ebo_34_1_261219.ScanId;v=1;d1=5777.5777.3	controllerType=0 controllerNumber=1 scan=5777	17.9501
05047:3	1	S.M[+15.995]PLP[+31.990]PHPGHPG.Y		M[+16], P[+32]	395.524	3	1184.56	1184.55	0	5.4	17	Non	148.16	129.52	1.74	0.71	2376	>sp|P02817|AMELX_BOVIN Amelogenin, X isoform OS=Bos taurus OX=9913 GN=AMELX PE=1 SV=2	1	hf1_10472_ebo_34_1_261219.ScanId;v=1;d1=5508.5508.3	controllerType=0 controllerNumber=1 scan=5508	17.5027
06247:2	1	S.M[+15.995]PLPPHPGH[+15.995]PG.Y		H[+16], M[+16]	584.785	2	1168.56	1168.56	0	5.2	17	Non	160.9	121.65	3.48	0.54	2376	>sp|P02817|AMELX_BOVIN Amelogenin, X isoform OS=Bos taurus OX=9913 GN=AMELX PE=1 SV=2	1	hf1_10472_ebo_34_1_261219.ScanId;v=1;d1=6364.6364.2	controllerType=0 controllerNumber=1 scan=6364	18.9578
09591:2	1	S.M[+15.995]PLPPHPGH[+15.995]PG.Y		H[+16], M[+16]	584.786	2	1168.57	1168.56	0	7.3	17	Non	162.58	100.67	16.41	0.55	2376	>sp|P02817|AMELX_BOVIN Amelogenin, X isoform OS=Bos taurus OX=9913 GN=AMELX PE=1 SV=2	1	hf1_10472_ebo_34_1_261219.ScanId;v=1;d1=8682.8682.2	controllerType=0 controllerNumber=1 scan=8682	22.8557
06214:2	1	S.M[+15.995]PLPPHPGH[+15.995]PG.Y		H[+16], M[+16]	584.785	2	1168.56	1168.56	0	5	17	Non	167.75	84.57	4.28	1.03	2376	>sp|P02817|AMELX_BOVIN Amelogenin, X isoform OS=Bos taurus OX=9913 GN=AMELX PE=1 SV=2	1	hf1_10472_ebo_34_1_261219.ScanId;v=1;d1=6339.6339.2	controllerType=0 controllerNumber=1 scan=6339	18.9136
05695:2	1	S.M[+15.995]PLPPHP[+15.995]GHPG.Y		M[+16], P[+16]	584.784	2	1168.56	1168.56	0	4.3	17	Non	203.13	167.07	6.06	2.5	2376	>sp|P02817|AMELX_BOVIN Amelogenin, X isoform OS=Bos taurus OX=9913 GN=AMELX PE=1 SV=2	1	hf1_10472_ebo_34_1_261219.ScanId;v=1;d1=5978.5978.3	controllerType=0 controllerNumber=1 scan=5978	18.3016
05764:2	1	S.M[+15.995]PLPPHPGHP[+15.995]G.Y		M[+16], P[+16]	584.785	2	1168.56	1168.56	0	5.7	17	Non	228.53	137.22	5.81	2.31	2376	>sp|P02817|AMELX_BOVIN Amelogenin, X isoform OS=Bos taurus OX=9913 GN=AMELX PE=1 SV=2	1	hf1_10472_ebo_34_1_261219.ScanId;v=1;d1=6025.6025.2	controllerType=0 controllerNumber=1 scan=6025	18.3783
05839:2	1	S.M[+15.995]PLPPHPGHP[+15.995]G.Y		M[+16], P[+16]	584.785	2	1168.56	1168.56	0	5.1	17	Non	231.05	213.31	19.97	2.82	2376	>sp|P02817|AMELX_BOVIN Amelogenin, X isoform OS=Bos taurus OX=9913 GN=AMELX PE=1 SV=2	1	hf1_10472_ebo_34_1_261219.ScanId;v=1;d1=6077.6077.2	controllerType=0 controllerNumber=1 scan=6077	18.4666
05215:3	1	S.M[+15.995]PLPPHPGHP[+15.995]G.Y		M[+16], P[+16]	390.193	3	1168.56	1168.56	0	6.4	17	Non	238.11	238.11	1.51	3.91	2376	>sp|P02817|AMELX_BOVIN Amelogenin, X isoform OS=Bos taurus OX=9913 GN=AMELX PE=1 SV=2	1	hf1_10472_ebo_34_1_261219.ScanId;v=1;d1=5628.5628.2	controllerType=0 controllerNumber=1 scan=5628	17.7007
06508:3	1	S.M[+15.995]PLP[+15.995]PHPGHPG.Y		M[+16], P[+16]	390.192	3	1168.56	1168.56	0	4.2	17	Non	253.79	203.62	14.63	3.85	2376	>sp|P02817|AMELX_BOVIN Amelogenin, X isoform OS=Bos taurus OX=9913 GN=AMELX PE=1 SV=2	1	hf1_10472_ebo_34_1_261219.ScanId;v=1;d1=6552.6552.3	controllerType=0 controllerNumber=1 scan=6552	19.2731
06220:3	1	S.M[+15.995]PLPPHPGH[+15.995]PG.Y		H[+16], M[+16]	390.192	3	1168.56	1168.56	0	4.8	17	Non	269.86	173.36	0.17	3.34	2376	>sp|P02817|AMELX_BOVIN Amelogenin, X isoform OS=Bos taurus OX=9913 GN=AMELX PE=1 SV=2	1	hf1_10472_ebo_34_1_261219.ScanId;v=1;d1=6345.6345.3	controllerType=0 controllerNumber=1 scan=6345	18.9252
10192:2	1	S.M[+15.995]PLPP[+15.995]HPGHPG.Y		M[+16], P[+16]	584.784	2	1168.56	1168.56	0	3.8	17	Non	291.78	291.78	3.77	4.44	2376	>sp|P02817|AMELX_BOVIN Amelogenin, X isoform OS=Bos taurus OX=9913 GN=AMELX PE=1 SV=2	1	hf1_10472_ebo_34_1_261219.ScanId;v=1;d1=9095.9095.2	controllerType=0 controllerNumber=1 scan=9095	23.5566
03907:3	1	S.M[+15.995]P[+15.995]LPPHPGHPG.Y		M[+16], P[+16]	390.192	3	1168.56	1168.56	0	5.4	17	Non	293.99	224.76	12.91	4.46	2376	>sp|P02817|AMELX_BOVIN Amelogenin, X isoform OS=Bos taurus OX=9913 GN=AMELX PE=1 SV=2	1	hf1_10472_ebo_34_1_261219.ScanId;v=1;d1=4681.4681.3	controllerType=0 controllerNumber=1 scan=4681	16.1299
05931:3	1	S.M[+15.995]PLPPHPGH[+15.995]PG.Y		H[+16], M[+16]	390.192	3	1168.56	1168.56	0	4.2	17	Non	302.42	210	2.2	4.11	2376	>sp|P02817|AMELX_BOVIN Amelogenin, X isoform OS=Bos taurus OX=9913 GN=AMELX PE=1 SV=2	1	hf1_10472_ebo_34_1_261219.ScanId;v=1;d1=6145.6145.3	controllerType=0 controllerNumber=1 scan=6145	18.5824
03622:3	1	S.M[+15.995]P[+15.995]LPPHPGHPG.Y		M[+16], P[+16]	390.192	3	1168.56	1168.56	0	4	17	Non	306.49	282.21	8.46	4.42	2376	>sp|P02817|AMELX_BOVIN Amelogenin, X isoform OS=Bos taurus OX=9913 GN=AMELX PE=1 SV=2	1	hf1_10472_ebo_34_1_261219.ScanId;v=1;d1=4479.4479.3	controllerType=0 controllerNumber=1 scan=4479	15.7935
09893:2	1	S.M[+15.995]PLPPHP[+15.995]GHPG.Y		M[+16], P[+16]	584.786	2	1168.56	1168.56	0	6.5	17	Non	306.77	148.13	10.09	3.96	2376	>sp|P02817|AMELX_BOVIN Amelogenin, X isoform OS=Bos taurus OX=9913 GN=AMELX PE=1 SV=2	1	hf1_10472_ebo_34_1_261219.ScanId;v=1;d1=8888.8888.2	controllerType=0 controllerNumber=1 scan=8888	23.2059
05449:2	1	S.M[+15.995]PLPPHPGHP[+15.995]G.Y		M[+16], P[+16]	584.784	2	1168.56	1168.56	0	3.7	17	Non	318.83	272.26	49.12	4.72	2376	>sp|P02817|AMELX_BOVIN Amelogenin, X isoform OS=Bos taurus OX=9913 GN=AMELX PE=1 SV=2	1	hf1_10472_ebo_34_1_261219.ScanId;v=1;d1=5792.5792.2	controllerType=0 controllerNumber=1 scan=5792	17.9747
04772:3	1	S.M[+15.995]PLPPHPGHP[+15.995]G.Y		M[+16], P[+16]	390.192	3	1168.56	1168.56	0	5	17	Non	381.09	327.93	13.02	5.27	2376	>sp|P02817|AMELX_BOVIN Amelogenin, X isoform OS=Bos taurus OX=9913 GN=AMELX PE=1 SV=2	1	hf1_10472_ebo_34_1_261219.ScanId;v=1;d1=5307.5307.3	controllerType=0 controllerNumber=1 scan=5307	17.1694
05051:3	1	S.M[+15.995]PLPPHPGHP[+15.995]G.Y		M[+16], P[+16]	390.192	3	1168.56	1168.56	0	4.3	17	Non	388.6	371.71	9.87	6.06	2376	>sp|P02817|AMELX_BOVIN Amelogenin, X isoform OS=Bos taurus OX=9913 GN=AMELX PE=1 SV=2	1	hf1_10472_ebo_34_1_261219.ScanId;v=1;d1=5512.5512.3	controllerType=0 controllerNumber=1 scan=5512	17.5114
04353:2	1	S.M[+15.995]PLPPHPGHP[+15.995]G.Y		M[+16], P[+16]	584.785	2	1168.56	1168.56	0	5.3	17	Non	420.25	250.04	59.15	5.34	2376	>sp|P02817|AMELX_BOVIN Amelogenin, X isoform OS=Bos taurus OX=9913 GN=AMELX PE=1 SV=2	1	hf1_10472_ebo_34_1_261219.ScanId;v=1;d1=5008.5008.2	controllerType=0 controllerNumber=1 scan=5008	16.6689
04895:2	1	S.M[+15.995]PLPPHPGHP[+15.995]G.Y		M[+16], P[+16]	584.784	2	1168.56	1168.56	0	4	17	Non	420.28	386.06	42.37	6.58	2376	>sp|P02817|AMELX_BOVIN Amelogenin, X isoform OS=Bos taurus OX=9913 GN=AMELX PE=1 SV=2	1	hf1_10472_ebo_34_1_261219.ScanId;v=1;d1=5398.5398.2	controllerType=0 controllerNumber=1 scan=5398	17.3201
04971:2	1	S.M[+15.995]PLPPHPGHP[+15.995]G.Y		M[+16], P[+16]	584.784	2	1168.56	1168.56	0	4.3	17	Non	434.79	414.9	43.48	6.53	2376	>sp|P02817|AMELX_BOVIN Amelogenin, X isoform OS=Bos taurus OX=9913 GN=AMELX PE=1 SV=2	1	hf1_10472_ebo_34_1_261219.ScanId;v=1;d1=5452.5452.2	controllerType=0 controllerNumber=1 scan=5452	17.4115
04688:2	1	S.M[+15.995]PLPPHPGHP[+15.995]G.Y		M[+16], P[+16]	584.785	2	1168.56	1168.56	0	5.4	17	Non	492.65	343.2	57.83	5.89	2376	>sp|P02817|AMELX_BOVIN Amelogenin, X isoform OS=Bos taurus OX=9913 GN=AMELX PE=1 SV=2	1	hf1_10472_ebo_34_1_261219.ScanId;v=1;d1=5242.5242.2	controllerType=0 controllerNumber=1 scan=5242	17.0619
14583:2	1	S.MPLPPHPGHPGY.I			650.323	2	1299.64	1299.63	0	6.2	17	Non	329.07	231.57	231.57	4.42	2376	>sp|P02817|AMELX_BOVIN Amelogenin, X isoform OS=Bos taurus OX=9913 GN=AMELX PE=1 SV=2	1	hf1_10472_ebo_34_1_261219.ScanId;v=1;d1=12049.12049.4	controllerType=0 controllerNumber=1 scan=12049	28.6348
14374:3	1	S.MPLPPHPGHPGY.I			433.884	3	1299.64	1299.63	0	5.4	17	Non	380.65	282.03	282.03	4.69	2376	>sp|P02817|AMELX_BOVIN Amelogenin, X isoform OS=Bos taurus OX=9913 GN=AMELX PE=1 SV=2	1	hf1_10472_ebo_34_1_261219.ScanId;v=1;d1=11916.11916.3	controllerType=0 controllerNumber=1 scan=11916	28.4114
13249:2	1	S.MPLPPHPGHPGY.I			650.321	2	1299.63	1299.63	0	3.4	17	Non	393.48	300.87	300.87	5.12	2376	>sp|P02817|AMELX_BOVIN Amelogenin, X isoform OS=Bos taurus OX=9913 GN=AMELX PE=1 SV=2	1	hf1_10472_ebo_34_1_261219.ScanId;v=1;d1=11182.11182.2	controllerType=0 controllerNumber=1 scan=11182	27.1577
14355:2	1	S.MPLPPHPGHPGY.I			650.321	2	1299.63	1299.63	0	3.3	17	Non	397.86	323.7	323.7	5.12	2376	>sp|P02817|AMELX_BOVIN Amelogenin, X isoform OS=Bos taurus OX=9913 GN=AMELX PE=1 SV=2	1	hf1_10472_ebo_34_1_261219.ScanId;v=1;d1=11905.11905.2	controllerType=0 controllerNumber=1 scan=11905	28.3928
12894:3	1	S.MPLPPHPGHPGY.I			433.884	3	1299.64	1299.63	0	5.1	17	Non	398.54	269.8	269.8	4.78	2376	>sp|P02817|AMELX_BOVIN Amelogenin, X isoform OS=Bos taurus OX=9913 GN=AMELX PE=1 SV=2	1	hf1_10472_ebo_34_1_261219.ScanId;v=1;d1=10937.10937.3	controllerType=0 controllerNumber=1 scan=10937	26.7273
14352:2	1	S.MPLPPHPGHPGY.I			650.321	2	1299.63	1299.63	0	3.3	17	Non	420.68	311.92	311.92	5.2	2376	>sp|P02817|AMELX_BOVIN Amelogenin, X isoform OS=Bos taurus OX=9913 GN=AMELX PE=1 SV=2	1	hf1_10472_ebo_34_1_261219.ScanId;v=1;d1=11903.11903.2	controllerType=0 controllerNumber=1 scan=11903	28.3898
14464:3	1	S.MPLPPHPGHPGY.I			433.884	3	1299.64	1299.63	0	5.2	17	Non	424.64	317.52	317.52	5	2376	>sp|P02817|AMELX_BOVIN Amelogenin, X isoform OS=Bos taurus OX=9913 GN=AMELX PE=1 SV=2	1	hf1_10472_ebo_34_1_261219.ScanId;v=1;d1=11971.11971.3	controllerType=0 controllerNumber=1 scan=11971	28.5038
14767:3	1	S.MPLPPHPGHPGY.I			433.884	3	1299.64	1299.63	0	4.2	17	Non	433.77	287.33	287.33	4.92	2376	>sp|P02817|AMELX_BOVIN Amelogenin, X isoform OS=Bos taurus OX=9913 GN=AMELX PE=1 SV=2	1	hf1_10472_ebo_34_1_261219.ScanId;v=1;d1=12176.12176.3	controllerType=0 controllerNumber=1 scan=12176	28.8468
13489:3	1	S.MPLPPHPGHPGY.I			433.884	3	1299.64	1299.63	0	4.4	17	Non	480.66	373.94	373.94	6.79	2376	>sp|P02817|AMELX_BOVIN Amelogenin, X isoform OS=Bos taurus OX=9913 GN=AMELX PE=1 SV=2	1	hf1_10472_ebo_34_1_261219.ScanId;v=1;d1=11342.11342.3	controllerType=0 controllerNumber=1 scan=11342	27.4354
13182:3	1	S.MPLPPHPGHPGY.I			433.884	3	1299.64	1299.63	0	4.5	17	Non	481.24	356.4	356.4	5.85	2376	>sp|P02817|AMELX_BOVIN Amelogenin, X isoform OS=Bos taurus OX=9913 GN=AMELX PE=1 SV=2	1	hf1_10472_ebo_34_1_261219.ScanId;v=1;d1=11135.11135.3	controllerType=0 controllerNumber=1 scan=11135	27.0814
13799:3	1	S.MPLPPHPGHPGY.I			433.884	3	1299.64	1299.63	0	4.7	17	Non	501.54	384.02	384.02	7.07	2376	>sp|P02817|AMELX_BOVIN Amelogenin, X isoform OS=Bos taurus OX=9913 GN=AMELX PE=1 SV=2	1	hf1_10472_ebo_34_1_261219.ScanId;v=1;d1=11548.11548.3	controllerType=0 controllerNumber=1 scan=11548	27.7866
14125:3	1	S.MPLPPHPGHPGY.I			433.884	3	1299.64	1299.63	0	5.5	17	Non	505.05	401.74	401.74	6.45	2376	>sp|P02817|AMELX_BOVIN Amelogenin, X isoform OS=Bos taurus OX=9913 GN=AMELX PE=1 SV=2	1	hf1_10472_ebo_34_1_261219.ScanId;v=1;d1=11758.11758.3	controllerType=0 controllerNumber=1 scan=11758	28.1414
12952:2	1	S.MPLPPHPGHPGY.I			650.323	2	1299.64	1299.63	0	6.2	17	Non	518.41	376.42	376.42	6.83	2376	>sp|P02817|AMELX_BOVIN Amelogenin, X isoform OS=Bos taurus OX=9913 GN=AMELX PE=1 SV=2	1	hf1_10472_ebo_34_1_261219.ScanId;v=1;d1=10977.10977.2	controllerType=0 controllerNumber=1 scan=10977	26.7969
13242:2	1	S.MPLPPHPGHPGY.I			650.321	2	1299.63	1299.63	0	3.4	17	Non	627.35	460.51	460.51	8.59	2376	>sp|P02817|AMELX_BOVIN Amelogenin, X isoform OS=Bos taurus OX=9913 GN=AMELX PE=1 SV=2	1	hf1_10472_ebo_34_1_261219.ScanId;v=1;d1=11178.11178.2	controllerType=0 controllerNumber=1 scan=11178	27.1523
14038:2	1	S.MPLPPHPGHPGY.I			650.322	2	1299.64	1299.63	0	4.9	17	Non	653.74	455.96	455.96	9.77	2376	>sp|P02817|AMELX_BOVIN Amelogenin, X isoform OS=Bos taurus OX=9913 GN=AMELX PE=1 SV=2	1	hf1_10472_ebo_34_1_261219.ScanId;v=1;d1=11703.11703.2	controllerType=0 controllerNumber=1 scan=11703	28.0488
13715:2	1	S.MPLPPHPGHPGY.I			650.322	2	1299.64	1299.63	0	4.7	17	Non	659.16	472.69	472.69	10.39	2376	>sp|P02817|AMELX_BOVIN Amelogenin, X isoform OS=Bos taurus OX=9913 GN=AMELX PE=1 SV=2	1	hf1_10472_ebo_34_1_261219.ScanId;v=1;d1=11493.11493.2	controllerType=0 controllerNumber=1 scan=11493	27.6923
11713:3	1	S.M[+15.995]PLPPHPGHPGY.I		M[+16]	439.217	3	1315.64	1315.63	0	7.9	17	Non	75.06	75.06	4.95	0.44	2376	>sp|P02817|AMELX_BOVIN Amelogenin, X isoform OS=Bos taurus OX=9913 GN=AMELX PE=1 SV=2	1	hf1_10472_ebo_34_1_261219.ScanId;v=1;d1=10150.10150.2	controllerType=0 controllerNumber=1 scan=10150	25.3811
11171:3	1	S.MP[+15.995]LPPHPGHPGY.I		P[+16]	439.216	3	1315.63	1315.63	0	6.6	17	Non	126.08	126.08	5.8	0.72	2376	>sp|P02817|AMELX_BOVIN Amelogenin, X isoform OS=Bos taurus OX=9913 GN=AMELX PE=1 SV=2	1	hf1_10472_ebo_34_1_261219.ScanId;v=1;d1=9776.9776.2	controllerType=0 controllerNumber=1 scan=9776	24.7375
09586:3	1	S.MP[+31.990]LPPHPGHPGY.I		P[+32]	444.547	3	1331.63	1331.62	0	5	17	Non	126.09	116.23	1.5	0.43	2376	>sp|P02817|AMELX_BOVIN Amelogenin, X isoform OS=Bos taurus OX=9913 GN=AMELX PE=1 SV=2	1	hf1_10472_ebo_34_1_261219.ScanId;v=1;d1=8679.8679.3	controllerType=0 controllerNumber=1 scan=8679	22.8512
10537:3	1	S.MP[+31.990]LPPHPGHPGY.I		P[+32]	444.547	3	1331.63	1331.62	0	4.1	17	Non	128.4	128.4	10.12	0.34	2376	>sp|P02817|AMELX_BOVIN Amelogenin, X isoform OS=Bos taurus OX=9913 GN=AMELX PE=1 SV=2	1	hf1_10472_ebo_34_1_261219.ScanId;v=1;d1=9333.9333.3	controllerType=0 controllerNumber=1 scan=9333	23.9689
10684:3	1	S.MP[+31.990]LPPHPGHPGY.I		P[+32]	444.548	3	1331.63	1331.62	0	6.3	17	Non	229.11	215.65	9	2.33	2376	>sp|P02817|AMELX_BOVIN Amelogenin, X isoform OS=Bos taurus OX=9913 GN=AMELX PE=1 SV=2	1	hf1_10472_ebo_34_1_261219.ScanId;v=1;d1=9445.9445.3	controllerType=0 controllerNumber=1 scan=9445	24.1713
12713:3	1	S.MPLPPHPGHP[+15.995]GY.I		P[+16]	439.216	3	1315.63	1315.63	0	6.3	17	Non	235.49	217.15	2.86	2.58	2376	>sp|P02817|AMELX_BOVIN Amelogenin, X isoform OS=Bos taurus OX=9913 GN=AMELX PE=1 SV=2	1	hf1_10472_ebo_34_1_261219.ScanId;v=1;d1=10817.10817.3	controllerType=0 controllerNumber=1 scan=10817	26.5243
11847:3	1	S.MPLPPH[+15.995]PGHPGY.I		H[+16]	439.217	3	1315.64	1315.63	0	7.9	17	Non	277.1	204.34	8.29	3.95	2376	>sp|P02817|AMELX_BOVIN Amelogenin, X isoform OS=Bos taurus OX=9913 GN=AMELX PE=1 SV=2	1	hf1_10472_ebo_34_1_261219.ScanId;v=1;d1=10237.10237.3	controllerType=0 controllerNumber=1 scan=10237	25.529
11281:3	1	S.M[+15.995]PLPPHPGHPGY.I		M[+16]	439.215	3	1315.63	1315.63	0	4.8	17	Non	347.01	272.59	31.99	4.35	2376	>sp|P02817|AMELX_BOVIN Amelogenin, X isoform OS=Bos taurus OX=9913 GN=AMELX PE=1 SV=2	1	hf1_10472_ebo_34_1_261219.ScanId;v=1;d1=9853.9853.3	controllerType=0 controllerNumber=1 scan=9853	24.8668
12162:3	1	S.MPLPPHPGHP[+15.995]GY.I		P[+16]	439.216	3	1315.63	1315.63	0	5.4	17	Non	350.16	235.27	14.96	4.55	2376	>sp|P02817|AMELX_BOVIN Amelogenin, X isoform OS=Bos taurus OX=9913 GN=AMELX PE=1 SV=2	1	hf1_10472_ebo_34_1_261219.ScanId;v=1;d1=10441.10441.3	controllerType=0 controllerNumber=1 scan=10441	25.8752
10833:3	1	S.M[+15.995]PLPPHPGHPGY.I		M[+16]	439.216	3	1315.63	1315.63	0	6.8	17	Non	380.12	300.55	22.34	5.17	2376	>sp|P02817|AMELX_BOVIN Amelogenin, X isoform OS=Bos taurus OX=9913 GN=AMELX PE=1 SV=2	1	hf1_10472_ebo_34_1_261219.ScanId;v=1;d1=9548.9548.3	controllerType=0 controllerNumber=1 scan=9548	24.3556
49976:3	1	S.M[+15.995]PLPPHPGHPGY.I		M[+16]	439.217	3	1315.64	1315.63	0	8.8	17	Non	416.89	328.34	34.59	4.54	2376	>sp|P02817|AMELX_BOVIN Amelogenin, X isoform OS=Bos taurus OX=9913 GN=AMELX PE=1 SV=2	1	hf1_10472_ebo_34_1_261219.ScanId;v=1;d1=36646.36646.3	controllerType=0 controllerNumber=1 scan=36646	73.501
08929:2	1	S.M[+15.995]PLPPHPGHPGY.I		M[+16]	658.32	2	1315.63	1315.63	0	5.4	17	Non	499.1	367.76	55.46	6.79	2376	>sp|P02817|AMELX_BOVIN Amelogenin, X isoform OS=Bos taurus OX=9913 GN=AMELX PE=1 SV=2	1	hf1_10472_ebo_34_1_261219.ScanId;v=1;d1=8221.8221.2	controllerType=0 controllerNumber=1 scan=8221	22.0719
10574:3	1	S.M[+15.995]PLPPHPGHPGY.I		M[+16]	439.216	3	1315.63	1315.63	0	6	17	Non	506.96	406.17	28.16	7.07	2376	>sp|P02817|AMELX_BOVIN Amelogenin, X isoform OS=Bos taurus OX=9913 GN=AMELX PE=1 SV=2	1	hf1_10472_ebo_34_1_261219.ScanId;v=1;d1=9360.9360.3	controllerType=0 controllerNumber=1 scan=9360	24.0178
09117:3	1	S.M[+15.995]PLPPHPGHPGY.I		M[+16]	439.215	3	1315.63	1315.63	0	4.9	17	Non	531.72	474.58	31.1	7.19	2376	>sp|P02817|AMELX_BOVIN Amelogenin, X isoform OS=Bos taurus OX=9913 GN=AMELX PE=1 SV=2	1	hf1_10472_ebo_34_1_261219.ScanId;v=1;d1=8356.8356.3	controllerType=0 controllerNumber=1 scan=8356	22.3024
10289:3	1	S.M[+15.995]PLPPHPGHPGY.I		M[+16]	439.216	3	1315.63	1315.63	0	5.2	17	Non	534.17	443.34	40.87	7.19	2376	>sp|P02817|AMELX_BOVIN Amelogenin, X isoform OS=Bos taurus OX=9913 GN=AMELX PE=1 SV=2	1	hf1_10472_ebo_34_1_261219.ScanId;v=1;d1=9164.9164.3	controllerType=0 controllerNumber=1 scan=9164	23.6773
09702:3	1	S.M[+15.995]PLPPHPGHPGY.I		M[+16]	439.216	3	1315.63	1315.63	0	5.9	17	Non	538.72	485.17	43.45	7.19	2376	>sp|P02817|AMELX_BOVIN Amelogenin, X isoform OS=Bos taurus OX=9913 GN=AMELX PE=1 SV=2	1	hf1_10472_ebo_34_1_261219.ScanId;v=1;d1=8761.8761.3	controllerType=0 controllerNumber=1 scan=8761	22.9927
09415:3	1	S.M[+15.995]PLPPHPGHPGY.I		M[+16]	439.216	3	1315.63	1315.63	0	5.5	17	Non	539.39	473.76	41.42	7.19	2376	>sp|P02817|AMELX_BOVIN Amelogenin, X isoform OS=Bos taurus OX=9913 GN=AMELX PE=1 SV=2	1	hf1_10472_ebo_34_1_261219.ScanId;v=1;d1=8563.8563.3	controllerType=0 controllerNumber=1 scan=8563	22.6543
09998:3	1	S.M[+15.995]PLPPHPGHPGY.I		M[+16]	439.216	3	1315.63	1315.63	0	6.1	17	Non	557.05	495.69	43.47	7.19	2376	>sp|P02817|AMELX_BOVIN Amelogenin, X isoform OS=Bos taurus OX=9913 GN=AMELX PE=1 SV=2	1	hf1_10472_ebo_34_1_261219.ScanId;v=1;d1=8962.8962.3	controllerType=0 controllerNumber=1 scan=8962	23.3339
10681:2	1	S.M[+15.995]PLPPHPGHPGY.I		M[+16]	658.32	2	1315.63	1315.63	0	5.4	17	Non	575.86	490.91	56.66	7.77	2376	>sp|P02817|AMELX_BOVIN Amelogenin, X isoform OS=Bos taurus OX=9913 GN=AMELX PE=1 SV=2	1	hf1_10472_ebo_34_1_261219.ScanId;v=1;d1=9442.9442.2	controllerType=0 controllerNumber=1 scan=9442	24.1641
10114:2	1	S.M[+15.995]PLPPHPGHPGY.I		M[+16]	658.32	2	1315.63	1315.63	0	5.3	17	Non	576.51	419.02	59.64	7.72	2376	>sp|P02817|AMELX_BOVIN Amelogenin, X isoform OS=Bos taurus OX=9913 GN=AMELX PE=1 SV=2	1	hf1_10472_ebo_34_1_261219.ScanId;v=1;d1=9041.9041.2	controllerType=0 controllerNumber=1 scan=9041	23.4637
10411:2	1	S.M[+15.995]PLPPHPGHPGY.I		M[+16]	658.318	2	1315.63	1315.63	0	2.4	17	Non	580.15	519.37	63.96	7.11	2376	>sp|P02817|AMELX_BOVIN Amelogenin, X isoform OS=Bos taurus OX=9913 GN=AMELX PE=1 SV=2	1	hf1_10472_ebo_34_1_261219.ScanId;v=1;d1=9243.9243.2	controllerType=0 controllerNumber=1 scan=9243	23.8081
09522:2	1	S.M[+15.995]PLPPHPGHPGY.I		M[+16]	658.319	2	1315.63	1315.63	0	4.7	17	Non	604.23	479.48	65.2	9.39	2376	>sp|P02817|AMELX_BOVIN Amelogenin, X isoform OS=Bos taurus OX=9913 GN=AMELX PE=1 SV=2	1	hf1_10472_ebo_34_1_261219.ScanId;v=1;d1=8631.8631.2	controllerType=0 controllerNumber=1 scan=8631	22.7661
09809:2	1	S.M[+15.995]PLPPHPGHPGY.I		M[+16]	658.32	2	1315.63	1315.63	0	5.6	17	Non	623.89	486.97	77.13	9.39	2376	>sp|P02817|AMELX_BOVIN Amelogenin, X isoform OS=Bos taurus OX=9913 GN=AMELX PE=1 SV=2	1	hf1_10472_ebo_34_1_261219.ScanId;v=1;d1=8833.8833.2	controllerType=0 controllerNumber=1 scan=8833	23.1125
09219:2	1	S.M[+15.995]PLPPHPGHPGY.I		M[+16]	658.319	2	1315.63	1315.63	0	4.1	17	Non	653.1	520.59	88.79	10.21	2376	>sp|P02817|AMELX_BOVIN Amelogenin, X isoform OS=Bos taurus OX=9913 GN=AMELX PE=1 SV=2	1	hf1_10472_ebo_34_1_261219.ScanId;v=1;d1=8429.8429.2	controllerType=0 controllerNumber=1 scan=8429	22.4232
08969:3	1	S.M[+15.995]PLPPHP[+15.995]GHPGY.I		M[+16], P[+16]	444.547	3	1331.63	1331.62	0	5	17	Non	43.86	43.86	0	0.35	2376	>sp|P02817|AMELX_BOVIN Amelogenin, X isoform OS=Bos taurus OX=9913 GN=AMELX PE=1 SV=2	1	hf1_10472_ebo_34_1_261219.ScanId;v=1;d1=8251.8251.2	controllerType=0 controllerNumber=1 scan=8251	22.127
08295:2	1	S.M[+15.995]PLPPHPGHP[+15.995]GY.I		M[+16], P[+16]	666.317	2	1331.63	1331.62	0	4.3	17	Non	144.78	119.74	6.76	0.85	2376	>sp|P02817|AMELX_BOVIN Amelogenin, X isoform OS=Bos taurus OX=9913 GN=AMELX PE=1 SV=2	1	hf1_10472_ebo_34_1_261219.ScanId;v=1;d1=7784.7784.2	controllerType=0 controllerNumber=1 scan=7784	21.3344
09224:3	1	S.M[+15.995]PLPPHP[+15.995]GHPGY.I		M[+16], P[+16]	444.547	3	1331.63	1331.62	0	4.3	17	Non	254.34	216.73	2.21	3.38	2376	>sp|P02817|AMELX_BOVIN Amelogenin, X isoform OS=Bos taurus OX=9913 GN=AMELX PE=1 SV=2	1	hf1_10472_ebo_34_1_261219.ScanId;v=1;d1=8432.8432.3	controllerType=0 controllerNumber=1 scan=8432	22.4275
07915:3	1	S.M[+15.995]PLPPHPGHP[+15.995]GY.I		M[+16], P[+16]	444.547	3	1331.63	1331.62	0	4.5	17	Non	298.35	277.19	12.88	4.6	2376	>sp|P02817|AMELX_BOVIN Amelogenin, X isoform OS=Bos taurus OX=9913 GN=AMELX PE=1 SV=2	1	hf1_10472_ebo_34_1_261219.ScanId;v=1;d1=7519.7519.3	controllerType=0 controllerNumber=1 scan=7519	20.8828
08486:3	1	S.M[+15.995]PLPPHPGHP[+15.995]GY.I		M[+16], P[+16]	444.547	3	1331.63	1331.62	0	4.1	17	Non	394	394	5.01	5.83	2376	>sp|P02817|AMELX_BOVIN Amelogenin, X isoform OS=Bos taurus OX=9913 GN=AMELX PE=1 SV=2	1	hf1_10472_ebo_34_1_261219.ScanId;v=1;d1=7917.7917.3	controllerType=0 controllerNumber=1 scan=7917	21.5548
17421:3	1	S.MPLPPHPGHPGYI.N			471.578	3	1412.72	1412.71	0	3.5	17	Non	82.93	21.61	21.61	0.46	2376	>sp|P02817|AMELX_BOVIN Amelogenin, X isoform OS=Bos taurus OX=9913 GN=AMELX PE=1 SV=2	1	hf1_10472_ebo_34_1_261219.ScanId;v=1;d1=14001.14001.2	controllerType=0 controllerNumber=1 scan=14001	31.8863
16847:3	1	S.MPLPPHPGHPGYI.N			471.579	3	1412.72	1412.71	0	4.8	17	Non	340.49	271.12	271.12	4.52	2376	>sp|P02817|AMELX_BOVIN Amelogenin, X isoform OS=Bos taurus OX=9913 GN=AMELX PE=1 SV=2	1	hf1_10472_ebo_34_1_261219.ScanId;v=1;d1=13589.13589.3	controllerType=0 controllerNumber=1 scan=13589	31.1853
13428:3	1	S.MP[+15.995]LPPHPGHPGYI.N		P[+16]	476.91	3	1428.72	1428.71	0	4.3	17	Non	90.2	90.2	4	0.62	2376	>sp|P02817|AMELX_BOVIN Amelogenin, X isoform OS=Bos taurus OX=9913 GN=AMELX PE=1 SV=2	1	hf1_10472_ebo_34_1_261219.ScanId;v=1;d1=11300.11300.3	controllerType=0 controllerNumber=1 scan=11300	27.3599
13740:2	1	S.M[+15.995]PLPPHPGHPGYI.N		M[+16]	714.863	2	1428.72	1428.71	0	6.1	17	Non	283.56	194.43	14.49	4.12	2376	>sp|P02817|AMELX_BOVIN Amelogenin, X isoform OS=Bos taurus OX=9913 GN=AMELX PE=1 SV=2	1	hf1_10472_ebo_34_1_261219.ScanId;v=1;d1=11508.11508.2	controllerType=0 controllerNumber=1 scan=11508	27.7164
14643:3	1	S.M[+15.995]PLPPHPGHPGYI.N		M[+16]	476.91	3	1428.72	1428.71	0	4.7	17	Non	368.09	302.2	11.31	4.83	2376	>sp|P02817|AMELX_BOVIN Amelogenin, X isoform OS=Bos taurus OX=9913 GN=AMELX PE=1 SV=2	1	hf1_10472_ebo_34_1_261219.ScanId;v=1;d1=12090.12090.3	controllerType=0 controllerNumber=1 scan=12090	28.7033
14315:3	1	S.M[+15.995]PLPPHPGHPGYI.N		M[+16]	476.911	3	1428.72	1428.71	0	5.8	17	Non	377.65	343.07	12.4	4.64	2376	>sp|P02817|AMELX_BOVIN Amelogenin, X isoform OS=Bos taurus OX=9913 GN=AMELX PE=1 SV=2	1	hf1_10472_ebo_34_1_261219.ScanId;v=1;d1=11880.11880.3	controllerType=0 controllerNumber=1 scan=11880	28.3505
13999:3	1	S.M[+15.995]PLPPHPGHPGYI.N		M[+16]	476.911	3	1428.72	1428.71	0	5.5	17	Non	500.79	407.14	9.58	6.45	2376	>sp|P02817|AMELX_BOVIN Amelogenin, X isoform OS=Bos taurus OX=9913 GN=AMELX PE=1 SV=2	1	hf1_10472_ebo_34_1_261219.ScanId;v=1;d1=11675.11675.3	controllerType=0 controllerNumber=1 scan=11675	27.9996
48616:3	1	S.MPLPPHPGHPGYIN.F			509.593	3	1526.77	1526.76	0	5.5	17	Non	58.96	58.96	58.96	0.83	2376	>sp|P02817|AMELX_BOVIN Amelogenin, X isoform OS=Bos taurus OX=9913 GN=AMELX PE=1 SV=2	1	hf1_10472_ebo_34_1_261219.ScanId;v=1;d1=35428.35428.3	controllerType=0 controllerNumber=1 scan=35428	70.5657
15961:3	1	S.MPLPPHPGHPGYIN.F			509.593	3	1526.76	1526.76	0	4.2	17	Non	452.29	353.23	353.23	5.61	2376	>sp|P02817|AMELX_BOVIN Amelogenin, X isoform OS=Bos taurus OX=9913 GN=AMELX PE=1 SV=2	1	hf1_10472_ebo_34_1_261219.ScanId;v=1;d1=13004.13004.3	controllerType=0 controllerNumber=1 scan=13004	30.2048
16046:2	1	S.MPLPPHPGHPGYIN.F			763.886	2	1526.76	1526.76	0	4.7	17	Non	453.29	333.13	333.13	5.89	2376	>sp|P02817|AMELX_BOVIN Amelogenin, X isoform OS=Bos taurus OX=9913 GN=AMELX PE=1 SV=2	1	hf1_10472_ebo_34_1_261219.ScanId;v=1;d1=13060.13060.2	controllerType=0 controllerNumber=1 scan=13060	30.2981
15684:3	1	S.MPLPPHPGHPGYIN.F			509.592	3	1526.76	1526.76	0	3.2	17	Non	513.37	399.16	399.16	7.24	2376	>sp|P02817|AMELX_BOVIN Amelogenin, X isoform OS=Bos taurus OX=9913 GN=AMELX PE=1 SV=2	1	hf1_10472_ebo_34_1_261219.ScanId;v=1;d1=12803.12803.3	controllerType=0 controllerNumber=1 scan=12803	29.8648
14763:3	1	S.MPLPPHPGHPGYIN.F			509.593	3	1526.76	1526.76	0	3.9	17	Non	558.25	419.58	419.58	7.36	2376	>sp|P02817|AMELX_BOVIN Amelogenin, X isoform OS=Bos taurus OX=9913 GN=AMELX PE=1 SV=2	1	hf1_10472_ebo_34_1_261219.ScanId;v=1;d1=12172.12172.3	controllerType=0 controllerNumber=1 scan=12172	28.8381
15064:3	1	S.MPLPPHPGHPGYIN.F			509.593	3	1526.76	1526.76	0	4.3	17	Non	568	483.31	483.31	8.18	2376	>sp|P02817|AMELX_BOVIN Amelogenin, X isoform OS=Bos taurus OX=9913 GN=AMELX PE=1 SV=2	1	hf1_10472_ebo_34_1_261219.ScanId;v=1;d1=12377.12377.3	controllerType=0 controllerNumber=1 scan=12377	29.1792
15365:3	1	S.MPLPPHPGHPGYIN.F			509.594	3	1526.77	1526.76	0	5.9	17	Non	593.24	496.49	496.49	8.36	2376	>sp|P02817|AMELX_BOVIN Amelogenin, X isoform OS=Bos taurus OX=9913 GN=AMELX PE=1 SV=2	1	hf1_10472_ebo_34_1_261219.ScanId;v=1;d1=12583.12583.3	controllerType=0 controllerNumber=1 scan=12583	29.5205
14815:2	1	S.MPLPPHPGHPGYIN.F			763.886	2	1526.76	1526.76	0	4.7	17	Non	600.26	453.03	453.03	9.12	2376	>sp|P02817|AMELX_BOVIN Amelogenin, X isoform OS=Bos taurus OX=9913 GN=AMELX PE=1 SV=2	1	hf1_10472_ebo_34_1_261219.ScanId;v=1;d1=12212.12212.2	controllerType=0 controllerNumber=1 scan=12212	28.9037
15435:2	1	S.MPLPPHPGHPGYIN.F			763.886	2	1526.76	1526.76	0	4.5	17	Non	715.29	520.69	520.69	11.56	2376	>sp|P02817|AMELX_BOVIN Amelogenin, X isoform OS=Bos taurus OX=9913 GN=AMELX PE=1 SV=2	1	hf1_10472_ebo_34_1_261219.ScanId;v=1;d1=12627.12627.2	controllerType=0 controllerNumber=1 scan=12627	29.5934
15126:2	1	S.MPLPPHPGHPGYIN.F			763.885	2	1526.76	1526.76	0	3.2	17	Non	732.1	511.53	511.53	11.56	2376	>sp|P02817|AMELX_BOVIN Amelogenin, X isoform OS=Bos taurus OX=9913 GN=AMELX PE=1 SV=2	1	hf1_10472_ebo_34_1_261219.ScanId;v=1;d1=12421.12421.2	controllerType=0 controllerNumber=1 scan=12421	29.2518
50466:3	1	S.MP[+15.995]LPPHPGHPGYIN.F		P[+16]	514.925	3	1542.76	1542.75	0	5.4	17	Non	0.28	0.28	0.28	0.62	2376	>sp|P02817|AMELX_BOVIN Amelogenin, X isoform OS=Bos taurus OX=9913 GN=AMELX PE=1 SV=2	1	hf1_10472_ebo_34_1_261219.ScanId;v=1;d1=37326.37326.3	controllerType=0 controllerNumber=1 scan=37326	76.2843
00267:3	1	S.MP[+15.995]LPPHPGHPGYIN.F		P[+16]	514.924	3	1542.76	1542.75	0	3	17	Non	5.64	5.64	4	0.25	2376	>sp|P02817|AMELX_BOVIN Amelogenin, X isoform OS=Bos taurus OX=9913 GN=AMELX PE=1 SV=2	1	hf1_10472_ebo_34_1_261219.ScanId;v=1;d1=1812.1812.3	controllerType=0 controllerNumber=1 scan=1812	10.0451
48808:3	1	S.MP[+15.995]LPPHPGHPGYIN.F		P[+16]	514.924	3	1542.76	1542.75	0	3.8	17	Non	75.2	75.2	4	0.81	2376	>sp|P02817|AMELX_BOVIN Amelogenin, X isoform OS=Bos taurus OX=9913 GN=AMELX PE=1 SV=2	1	hf1_10472_ebo_34_1_261219.ScanId;v=1;d1=35602.35602.3	controllerType=0 controllerNumber=1 scan=35602	70.9894
48467:3	1	S.MP[+15.995]LPPHPGHPGYIN.F		P[+16]	514.925	3	1542.76	1542.75	0	4.7	17	Non	77.53	77.53	4	0.54	2376	>sp|P02817|AMELX_BOVIN Amelogenin, X isoform OS=Bos taurus OX=9913 GN=AMELX PE=1 SV=2	1	hf1_10472_ebo_34_1_261219.ScanId;v=1;d1=35310.35310.3	controllerType=0 controllerNumber=1 scan=35310	70.2996
48222:3	1	S.MP[+15.995]LPPHPGHPGYIN.F		P[+16]	514.925	3	1542.76	1542.75	0	5.9	17	Non	83.28	83.28	4	0.99	2376	>sp|P02817|AMELX_BOVIN Amelogenin, X isoform OS=Bos taurus OX=9913 GN=AMELX PE=1 SV=2	1	hf1_10472_ebo_34_1_261219.ScanId;v=1;d1=35102.35102.3	controllerType=0 controllerNumber=1 scan=35102	69.839
48006:3	1	S.MP[+15.995]LPPHPGHPGYIN.F		P[+16]	514.925	3	1542.76	1542.75	0	5.1	17	Non	90.32	90.32	4	0.99	2376	>sp|P02817|AMELX_BOVIN Amelogenin, X isoform OS=Bos taurus OX=9913 GN=AMELX PE=1 SV=2	1	hf1_10472_ebo_34_1_261219.ScanId;v=1;d1=34907.34907.3	controllerType=0 controllerNumber=1 scan=34907	69.3342
49173:3	1	S.MP[+15.995]LPPHPGHPGYIN.F		P[+16]	514.923	3	1542.76	1542.75	0	1.9	17	Non	124.76	124.76	4	1.11	2376	>sp|P02817|AMELX_BOVIN Amelogenin, X isoform OS=Bos taurus OX=9913 GN=AMELX PE=1 SV=2	1	hf1_10472_ebo_34_1_261219.ScanId;v=1;d1=35923.35923.3	controllerType=0 controllerNumber=1 scan=35923	71.7369
48415:3	1	S.MP[+15.995]LPPHPGHPGYIN.F		P[+16]	514.924	3	1542.76	1542.75	0	4.3	17	Non	127.43	127.43	4	1.45	2376	>sp|P02817|AMELX_BOVIN Amelogenin, X isoform OS=Bos taurus OX=9913 GN=AMELX PE=1 SV=2	1	hf1_10472_ebo_34_1_261219.ScanId;v=1;d1=35267.35267.2	controllerType=0 controllerNumber=1 scan=35267	70.2133
11129:3	1	S.MP[+15.995]LPPHPGHPGYIN.F		P[+16]	514.924	3	1542.76	1542.75	0	3.7	17	Non	135.38	135.38	4	0.82	2376	>sp|P02817|AMELX_BOVIN Amelogenin, X isoform OS=Bos taurus OX=9913 GN=AMELX PE=1 SV=2	1	hf1_10472_ebo_34_1_261219.ScanId;v=1;d1=9747.9747.2	controllerType=0 controllerNumber=1 scan=9747	24.6865
00042:3	1	S.MP[+15.995]LPPHPGHPGYIN.F		P[+16]	514.926	3	1542.76	1542.75	0	6.3	17	Non	163.25	163.25	4	2.57	2376	>sp|P02817|AMELX_BOVIN Amelogenin, X isoform OS=Bos taurus OX=9913 GN=AMELX PE=1 SV=2	1	hf1_10472_ebo_34_1_261219.ScanId;v=1;d1=126.126.3	controllerType=0 controllerNumber=1 scan=126	0.5763
14564:3	1	S.MPLPPHPGHPGY[+15.995]IN.F		Y[+16]	514.925	3	1542.76	1542.75	0	5	17	Non	174.13	174.13	10.29	2.33	2376	>sp|P02817|AMELX_BOVIN Amelogenin, X isoform OS=Bos taurus OX=9913 GN=AMELX PE=1 SV=2	1	hf1_10472_ebo_34_1_261219.ScanId;v=1;d1=12037.12037.2	controllerType=0 controllerNumber=1 scan=12037	28.6155
13953:3	1	S.MPLPP[+15.995]HPGHPGYIN.F		P[+16]	514.925	3	1542.76	1542.75	0	5.3	17	Non	263.84	225.37	14.24	4.11	2376	>sp|P02817|AMELX_BOVIN Amelogenin, X isoform OS=Bos taurus OX=9913 GN=AMELX PE=1 SV=2	1	hf1_10472_ebo_34_1_261219.ScanId;v=1;d1=11645.11645.3	controllerType=0 controllerNumber=1 scan=11645	27.9469
15099:3	1	S.MPLPPHPGH[+15.995]PGYIN.F		H[+16]	514.924	3	1542.76	1542.75	0	3	17	Non	280.35	209.59	0	3.91	2376	>sp|P02817|AMELX_BOVIN Amelogenin, X isoform OS=Bos taurus OX=9913 GN=AMELX PE=1 SV=2	1	hf1_10472_ebo_34_1_261219.ScanId;v=1;d1=12402.12402.3	controllerType=0 controllerNumber=1 scan=12402	29.2193
49908:3	1	S.MP[+15.995]LPPHPGHPGYIN.F		P[+16]	514.925	3	1542.76	1542.75	0	6	17	Non	286.99	286.99	4	4.95	2376	>sp|P02817|AMELX_BOVIN Amelogenin, X isoform OS=Bos taurus OX=9913 GN=AMELX PE=1 SV=2	1	hf1_10472_ebo_34_1_261219.ScanId;v=1;d1=36601.36601.3	controllerType=0 controllerNumber=1 scan=36601	73.4227
13542:3	1	S.MP[+31.990]LPPHPGHPGYIN.F		P[+32]	520.256	3	1558.75	1558.75	0	4.7	17	Non	299.77	299.77	1.8	4.59	2376	>sp|P02817|AMELX_BOVIN Amelogenin, X isoform OS=Bos taurus OX=9913 GN=AMELX PE=1 SV=2	1	hf1_10472_ebo_34_1_261219.ScanId;v=1;d1=11381.11381.3	controllerType=0 controllerNumber=1 scan=11381	27.5036
13330:3	1	S.M[+15.995]PLPPHPGHPGYIN.F		M[+16]	514.924	3	1542.76	1542.75	0	4.4	17	Non	316.2	316.2	4.37	4.83	2376	>sp|P02817|AMELX_BOVIN Amelogenin, X isoform OS=Bos taurus OX=9913 GN=AMELX PE=1 SV=2	1	hf1_10472_ebo_34_1_261219.ScanId;v=1;d1=11235.11235.3	controllerType=0 controllerNumber=1 scan=11235	27.2501
13042:3	1	S.M[+15.995]PLPPHPGHPGYIN.F		M[+16]	514.925	3	1542.76	1542.75	0	4.5	17	Non	332.3	332.3	16.36	5.03	2376	>sp|P02817|AMELX_BOVIN Amelogenin, X isoform OS=Bos taurus OX=9913 GN=AMELX PE=1 SV=2	1	hf1_10472_ebo_34_1_261219.ScanId;v=1;d1=11041.11041.3	controllerType=0 controllerNumber=1 scan=11041	26.9101
13745:2	1	S.M[+15.995]PLPPHPGHPGYIN.F		M[+16]	771.887	2	1542.77	1542.75	0	9.1	17	Non	346.68	304.97	11.3	4.4	2376	>sp|P02817|AMELX_BOVIN Amelogenin, X isoform OS=Bos taurus OX=9913 GN=AMELX PE=1 SV=2	1	hf1_10472_ebo_34_1_261219.ScanId;v=1;d1=11512.11512.2	controllerType=0 controllerNumber=1 scan=11512	27.7251
14542:2	1	S.MPLPPHP[+15.995]GHPGYIN.F		P[+16]	771.883	2	1542.76	1542.75	0	4.8	17	Non	347.38	274.08	5.35	5.08	2376	>sp|P02817|AMELX_BOVIN Amelogenin, X isoform OS=Bos taurus OX=9913 GN=AMELX PE=1 SV=2	1	hf1_10472_ebo_34_1_261219.ScanId;v=1;d1=12024.12024.2	controllerType=0 controllerNumber=1 scan=12024	28.5939
12544:3	1	S.M[+31.990]PLPPHPGHPGYIN.F		M[+32]	520.256	3	1558.75	1558.75	0	5	17	Non	347.67	347.67	6.67	4.99	2376	>sp|P02817|AMELX_BOVIN Amelogenin, X isoform OS=Bos taurus OX=9913 GN=AMELX PE=1 SV=2	1	hf1_10472_ebo_34_1_261219.ScanId;v=1;d1=10706.10706.3	controllerType=0 controllerNumber=1 scan=10706	26.3345
14198:2	1	S.MPLPPHPGHP[+15.995]GYIN.F		P[+16]	771.886	2	1542.76	1542.75	0	8.1	17	Non	358.05	257.01	0	5.48	2376	>sp|P02817|AMELX_BOVIN Amelogenin, X isoform OS=Bos taurus OX=9913 GN=AMELX PE=1 SV=2	1	hf1_10472_ebo_34_1_261219.ScanId;v=1;d1=11805.11805.2	controllerType=0 controllerNumber=1 scan=11805	28.221
14797:3	1	S.MPLPPHPGHP[+15.995]GYIN.F		P[+16]	514.925	3	1542.76	1542.75	0	4.7	17	Non	364.44	279.58	1.57	5.04	2376	>sp|P02817|AMELX_BOVIN Amelogenin, X isoform OS=Bos taurus OX=9913 GN=AMELX PE=1 SV=2	1	hf1_10472_ebo_34_1_261219.ScanId;v=1;d1=12196.12196.3	controllerType=0 controllerNumber=1 scan=12196	28.8759
12870:3	1	S.M[+31.990]PLPPHPGHPGYIN.F		M[+32]	520.256	3	1558.75	1558.75	0	5	17	Non	380.49	380.49	8.32	5.93	2376	>sp|P02817|AMELX_BOVIN Amelogenin, X isoform OS=Bos taurus OX=9913 GN=AMELX PE=1 SV=2	1	hf1_10472_ebo_34_1_261219.ScanId;v=1;d1=10923.10923.3	controllerType=0 controllerNumber=1 scan=10923	26.7037
12745:3	1	S.M[+15.995]PLPPHPGHPGYIN.F		M[+16]	514.926	3	1542.76	1542.75	0	6.5	17	Non	388.55	388.55	20.32	6.65	2376	>sp|P02817|AMELX_BOVIN Amelogenin, X isoform OS=Bos taurus OX=9913 GN=AMELX PE=1 SV=2	1	hf1_10472_ebo_34_1_261219.ScanId;v=1;d1=10841.10841.3	controllerType=0 controllerNumber=1 scan=10841	26.5678
12438:3	1	S.M[+15.995]PLPPHPGHPGYIN.F		M[+16]	514.925	3	1542.76	1542.75	0	5.3	17	Non	426.73	426.73	4.62	6.73	2376	>sp|P02817|AMELX_BOVIN Amelogenin, X isoform OS=Bos taurus OX=9913 GN=AMELX PE=1 SV=2	1	hf1_10472_ebo_34_1_261219.ScanId;v=1;d1=10636.10636.3	controllerType=0 controllerNumber=1 scan=10636	26.2131
15962:3	1	S.MPLPPHPGHPGYIN[+0.984].F		N[+1]	509.921	3	1527.75	1527.74	0	4.3	17	Non	447.54	410.68	410.68	6.5	2376	>sp|P02817|AMELX_BOVIN Amelogenin, X isoform OS=Bos taurus OX=9913 GN=AMELX PE=1 SV=2	1	hf1_10472_ebo_34_1_261219.ScanId;v=1;d1=13004.13004.3	controllerType=0 controllerNumber=1 scan=13004	30.2048
11255:3	1	S.M[+15.995]PLPPHPGHPGYIN.F		M[+16]	514.924	3	1542.76	1542.75	0	4.1	17	Non	494.69	494.69	14.6	7.24	2376	>sp|P02817|AMELX_BOVIN Amelogenin, X isoform OS=Bos taurus OX=9913 GN=AMELX PE=1 SV=2	1	hf1_10472_ebo_34_1_261219.ScanId;v=1;d1=9835.9835.3	controllerType=0 controllerNumber=1 scan=9835	24.8386
12159:3	1	S.M[+15.995]PLPPHPGHPGYIN.F		M[+16]	514.925	3	1542.76	1542.75	0	6	17	Non	495.05	495.05	6.92	7.42	2376	>sp|P02817|AMELX_BOVIN Amelogenin, X isoform OS=Bos taurus OX=9913 GN=AMELX PE=1 SV=2	1	hf1_10472_ebo_34_1_261219.ScanId;v=1;d1=10439.10439.3	controllerType=0 controllerNumber=1 scan=10439	25.8729
14263:3	1	S.MPLPPHPGHP[+15.995]GYIN.F		P[+16]	514.925	3	1542.76	1542.75	0	5.7	17	Non	504.48	405.54	9.66	6.76	2376	>sp|P02817|AMELX_BOVIN Amelogenin, X isoform OS=Bos taurus OX=9913 GN=AMELX PE=1 SV=2	1	hf1_10472_ebo_34_1_261219.ScanId;v=1;d1=11846.11846.3	controllerType=0 controllerNumber=1 scan=11846	28.2924
10942:3	1	S.M[+15.995]PLPPHPGHPGYIN.F		M[+16]	514.924	3	1542.76	1542.75	0	3.4	17	Non	509.02	509.02	19.62	6.62	2376	>sp|P02817|AMELX_BOVIN Amelogenin, X isoform OS=Bos taurus OX=9913 GN=AMELX PE=1 SV=2	1	hf1_10472_ebo_34_1_261219.ScanId;v=1;d1=9623.9623.3	controllerType=0 controllerNumber=1 scan=9623	24.4827
11545:3	1	S.M[+15.995]PLPPHPGHPGYIN.F		M[+16]	514.926	3	1542.76	1542.75	0	7.5	17	Non	509.53	509.53	14.98	7.47	2376	>sp|P02817|AMELX_BOVIN Amelogenin, X isoform OS=Bos taurus OX=9913 GN=AMELX PE=1 SV=2	1	hf1_10472_ebo_34_1_261219.ScanId;v=1;d1=10035.10035.3	controllerType=0 controllerNumber=1 scan=10035	25.1815
11833:3	1	S.M[+15.995]PLPPHPGHPGYIN.F		M[+16]	514.926	3	1542.76	1542.75	0	7.2	17	Non	511.38	511.38	12.49	7.47	2376	>sp|P02817|AMELX_BOVIN Amelogenin, X isoform OS=Bos taurus OX=9913 GN=AMELX PE=1 SV=2	1	hf1_10472_ebo_34_1_261219.ScanId;v=1;d1=10230.10230.3	controllerType=0 controllerNumber=1 scan=10230	25.5191
12796:2	1	S.M[+15.995]PLPPHPGHPGYIN.F		M[+16]	771.883	2	1542.76	1542.75	0	4.5	17	Non	516.04	501.01	51.37	6.96	2376	>sp|P02817|AMELX_BOVIN Amelogenin, X isoform OS=Bos taurus OX=9913 GN=AMELX PE=1 SV=2	1	hf1_10472_ebo_34_1_261219.ScanId;v=1;d1=10875.10875.2	controllerType=0 controllerNumber=1 scan=10875	26.6242
16263:3	1	S.MPLPPHPGHPGYIN[+0.984].F		N[+1]	509.921	3	1527.75	1527.74	0	4.3	17	Non	563.07	523.51	523.51	7.36	2376	>sp|P02817|AMELX_BOVIN Amelogenin, X isoform OS=Bos taurus OX=9913 GN=AMELX PE=1 SV=2	1	hf1_10472_ebo_34_1_261219.ScanId;v=1;d1=13210.13210.3	controllerType=0 controllerNumber=1 scan=13210	30.5539
16652:2	1	S.MPLPPHPGHPGYIN[+0.984].F		N[+1]	764.377	2	1527.75	1527.74	0	3	17	Non	574.96	534.59	534.59	7.66	2376	>sp|P02817|AMELX_BOVIN Amelogenin, X isoform OS=Bos taurus OX=9913 GN=AMELX PE=1 SV=2	1	hf1_10472_ebo_34_1_261219.ScanId;v=1;d1=13462.13462.2	controllerType=0 controllerNumber=1 scan=13462	30.9813
12495:2	1	S.M[+15.995]PLPPHPGHPGYIN.F		M[+16]	771.883	2	1542.76	1542.75	0	4.6	17	Non	586.91	532.77	65.92	8.08	2376	>sp|P02817|AMELX_BOVIN Amelogenin, X isoform OS=Bos taurus OX=9913 GN=AMELX PE=1 SV=2	1	hf1_10472_ebo_34_1_261219.ScanId;v=1;d1=10675.10675.2	controllerType=0 controllerNumber=1 scan=10675	26.2801
16580:3	1	S.MPLPPHPGHPGYIN[+0.984].F		N[+1]	509.921	3	1527.75	1527.74	0	5.6	17	Non	607.19	563.9	563.9	9.36	2376	>sp|P02817|AMELX_BOVIN Amelogenin, X isoform OS=Bos taurus OX=9913 GN=AMELX PE=1 SV=2	1	hf1_10472_ebo_34_1_261219.ScanId;v=1;d1=13416.13416.3	controllerType=0 controllerNumber=1 scan=13416	30.9075
11285:2	1	S.M[+15.995]PLPPHPGHPGYIN.F		M[+16]	771.883	2	1542.76	1542.75	0	3.8	17	Non	623.3	623.3	62.36	9.56	2376	>sp|P02817|AMELX_BOVIN Amelogenin, X isoform OS=Bos taurus OX=9913 GN=AMELX PE=1 SV=2	1	hf1_10472_ebo_34_1_261219.ScanId;v=1;d1=9857.9857.2	controllerType=0 controllerNumber=1 scan=9857	24.8755
10977:2	1	S.M[+15.995]PLPPHPGHPGYIN.F		M[+16]	771.884	2	1542.76	1542.75	0	4.9	17	Non	633.09	586.63	65.21	9.08	2376	>sp|P02817|AMELX_BOVIN Amelogenin, X isoform OS=Bos taurus OX=9913 GN=AMELX PE=1 SV=2	1	hf1_10472_ebo_34_1_261219.ScanId;v=1;d1=9646.9646.2	controllerType=0 controllerNumber=1 scan=9646	24.5203
12210:2	1	S.M[+15.995]PLPPHPGHPGYIN.F		M[+16]	771.884	2	1542.76	1542.75	0	5.4	17	Non	636.19	610.63	49.92	9.74	2376	>sp|P02817|AMELX_BOVIN Amelogenin, X isoform OS=Bos taurus OX=9913 GN=AMELX PE=1 SV=2	1	hf1_10472_ebo_34_1_261219.ScanId;v=1;d1=10474.10474.2	controllerType=0 controllerNumber=1 scan=10474	25.931
11582:2	1	S.M[+15.995]PLPPHPGHPGYIN.F		M[+16]	771.884	2	1542.76	1542.75	0	5	17	Non	648.08	639.04	58.83	9.12	2376	>sp|P02817|AMELX_BOVIN Amelogenin, X isoform OS=Bos taurus OX=9913 GN=AMELX PE=1 SV=2	1	hf1_10472_ebo_34_1_261219.ScanId;v=1;d1=10061.10061.2	controllerType=0 controllerNumber=1 scan=10061	25.2265
11884:2	1	S.M[+15.995]PLPPHPGHPGYIN.F		M[+16]	771.884	2	1542.76	1542.75	0	5.2	17	Non	658.63	647.63	62.62	10.74	2376	>sp|P02817|AMELX_BOVIN Amelogenin, X isoform OS=Bos taurus OX=9913 GN=AMELX PE=1 SV=2	1	hf1_10472_ebo_34_1_261219.ScanId;v=1;d1=10263.10263.2	controllerType=0 controllerNumber=1 scan=10263	25.5738
16326:2	1	S.MPLPPHPGHPGYIN[+0.984].F		N[+1]	764.378	2	1527.75	1527.74	0	4.5	17	Non	659.01	560.4	560.4	9.94	2376	>sp|P02817|AMELX_BOVIN Amelogenin, X isoform OS=Bos taurus OX=9913 GN=AMELX PE=1 SV=2	1	hf1_10472_ebo_34_1_261219.ScanId;v=1;d1=13255.13255.2	controllerType=0 controllerNumber=1 scan=13255	30.6369
12256:3	1	S.M[+15.995]PLPP[+15.995]HPGHPGYIN.F		M[+16], P[+16]	520.257	3	1558.76	1558.75	0	5.9	17	Non	141.22	141.22	2.5	0.54	2376	>sp|P02817|AMELX_BOVIN Amelogenin, X isoform OS=Bos taurus OX=9913 GN=AMELX PE=1 SV=2	1	hf1_10472_ebo_34_1_261219.ScanId;v=1;d1=10503.10503.3	controllerType=0 controllerNumber=1 scan=10503	25.9769
11305:3	1	S.M[+15.995]PLPPHPGH[+15.995]PGYIN.F		H[+16], M[+16]	520.256	3	1558.75	1558.75	0	4.3	17	Non	194.93	194.93	0	2.36	2376	>sp|P02817|AMELX_BOVIN Amelogenin, X isoform OS=Bos taurus OX=9913 GN=AMELX PE=1 SV=2	1	hf1_10472_ebo_34_1_261219.ScanId;v=1;d1=9874.9874.3	controllerType=0 controllerNumber=1 scan=9874	24.9055
11917:3	1	S.M[+15.995]PLPPHP[+15.995]GHPGYIN.F		M[+16], P[+16]	520.256	3	1558.75	1558.75	0	4	17	Non	231	231	0.82	2.42	2376	>sp|P02817|AMELX_BOVIN Amelogenin, X isoform OS=Bos taurus OX=9913 GN=AMELX PE=1 SV=2	1	hf1_10472_ebo_34_1_261219.ScanId;v=1;d1=10283.10283.3	controllerType=0 controllerNumber=1 scan=10283	25.6042
11276:3	1	S.MP[+15.995]LPPHPGHP[+15.995]GYIN.F		P[+16]*2	520.256	3	1558.75	1558.75	0	3.7	17	Non	270.38	270.38	4	4.07	2376	>sp|P02817|AMELX_BOVIN Amelogenin, X isoform OS=Bos taurus OX=9913 GN=AMELX PE=1 SV=2	1	hf1_10472_ebo_34_1_261219.ScanId;v=1;d1=9851.9851.3	controllerType=0 controllerNumber=1 scan=9851	24.8641
11568:3	1	S.MP[+15.995]LPPHPGHP[+15.995]GYIN.F		P[+16]*2	520.255	3	1558.75	1558.75	0	2.9	17	Non	287.32	287.32	5.8	4.27	2376	>sp|P02817|AMELX_BOVIN Amelogenin, X isoform OS=Bos taurus OX=9913 GN=AMELX PE=1 SV=2	1	hf1_10472_ebo_34_1_261219.ScanId;v=1;d1=10052.10052.3	controllerType=0 controllerNumber=1 scan=10052	25.2103
15420:3	1	S.MPLPPHPGHP[+15.995]GYIN[+0.984].F		N[+1], P[+16]	515.251	3	1543.74	1543.74	0	0.8	17	Non	344.26	341.04	6.8	4.44	2376	>sp|P02817|AMELX_BOVIN Amelogenin, X isoform OS=Bos taurus OX=9913 GN=AMELX PE=1 SV=2	1	hf1_10472_ebo_34_1_261219.ScanId;v=1;d1=12618.12618.3	controllerType=0 controllerNumber=1 scan=12618	29.5787
09927:3	1	S.M[+15.995]PLPPHPGHP[+15.995]GYIN.F		M[+16], P[+16]	520.256	3	1558.75	1558.75	0	5	17	Non	351.44	351.44	5.78	5.33	2376	>sp|P02817|AMELX_BOVIN Amelogenin, X isoform OS=Bos taurus OX=9913 GN=AMELX PE=1 SV=2	1	hf1_10472_ebo_34_1_261219.ScanId;v=1;d1=8912.8912.3	controllerType=0 controllerNumber=1 scan=8912	23.2463
10144:2	1	S.M[+15.995]PLPPHPGHP[+15.995]GYIN.F		M[+16], P[+16]	779.881	2	1558.76	1558.75	0	5.6	17	Non	354.17	354.17	0	5.72	2376	>sp|P02817|AMELX_BOVIN Amelogenin, X isoform OS=Bos taurus OX=9913 GN=AMELX PE=1 SV=2	1	hf1_10472_ebo_34_1_261219.ScanId;v=1;d1=9062.9062.2	controllerType=0 controllerNumber=1 scan=9062	23.4994
10702:2	1	S.M[+15.995]PLPPHPGHP[+15.995]GYIN.F		M[+16], P[+16]	779.881	2	1558.75	1558.75	0	4.3	17	Non	362.76	251.11	0	5.1	2376	>sp|P02817|AMELX_BOVIN Amelogenin, X isoform OS=Bos taurus OX=9913 GN=AMELX PE=1 SV=2	1	hf1_10472_ebo_34_1_261219.ScanId;v=1;d1=9459.9459.2	controllerType=0 controllerNumber=1 scan=9459	24.1979
10227:3	1	S.MP[+15.995]LPPHPGHP[+15.995]GYIN.F		P[+16]*2	520.256	3	1558.75	1558.75	0	4.1	17	Non	373.34	373.34	0.71	6.38	2376	>sp|P02817|AMELX_BOVIN Amelogenin, X isoform OS=Bos taurus OX=9913 GN=AMELX PE=1 SV=2	1	hf1_10472_ebo_34_1_261219.ScanId;v=1;d1=9121.9121.3	controllerType=0 controllerNumber=1 scan=9121	23.6024
10437:2	1	S.M[+15.995]PLPPHPGHP[+15.995]GYIN.F		M[+16], P[+16]	779.881	2	1558.75	1558.75	0	4.5	17	Non	403.65	403.65	0	6.51	2376	>sp|P02817|AMELX_BOVIN Amelogenin, X isoform OS=Bos taurus OX=9913 GN=AMELX PE=1 SV=2	1	hf1_10472_ebo_34_1_261219.ScanId;v=1;d1=9263.9263.2	controllerType=0 controllerNumber=1 scan=9263	23.8423
13438:2	1	S.M[+15.995]PLPPHPGHPGYIN[+0.984].F		M[+16], N[+1]	772.375	2	1543.74	1543.74	0	3.7	17	Non	403.7	369.52	30.95	6.57	2376	>sp|P02817|AMELX_BOVIN Amelogenin, X isoform OS=Bos taurus OX=9913 GN=AMELX PE=1 SV=2	1	hf1_10472_ebo_34_1_261219.ScanId;v=1;d1=11306.11306.2	controllerType=0 controllerNumber=1 scan=11306	27.3716
10524:3	1	S.M[+15.995]PLPPHPGHP[+15.995]GYIN.F		M[+16], P[+16]	520.257	3	1558.76	1558.75	0	5.3	17	Non	414.76	414.76	2.53	6.36	2376	>sp|P02817|AMELX_BOVIN Amelogenin, X isoform OS=Bos taurus OX=9913 GN=AMELX PE=1 SV=2	1	hf1_10472_ebo_34_1_261219.ScanId;v=1;d1=9324.9324.3	controllerType=0 controllerNumber=1 scan=9324	23.9535
13128:2	1	S.M[+15.995]PLPPHPGHPGYIN[+0.984].F		M[+16], N[+1]	772.372	2	1543.74	1543.74	0	0.8	17	Non	417.17	379.69	38.45	6.26	2376	>sp|P02817|AMELX_BOVIN Amelogenin, X isoform OS=Bos taurus OX=9913 GN=AMELX PE=1 SV=2	1	hf1_10472_ebo_34_1_261219.ScanId;v=1;d1=11100.11100.2	controllerType=0 controllerNumber=1 scan=11100	27.018
12746:3	1	S.M[+15.995]PLPPHPGHPGYIN[+0.984].F		M[+16], N[+1]	515.255	3	1543.75	1543.74	0	8.6	17	Non	468.31	468.31	15.62	6.51	2376	>sp|P02817|AMELX_BOVIN Amelogenin, X isoform OS=Bos taurus OX=9913 GN=AMELX PE=1 SV=2	1	hf1_10472_ebo_34_1_261219.ScanId;v=1;d1=10841.10841.3	controllerType=0 controllerNumber=1 scan=10841	26.5678
12797:2	1	S.M[+15.995]PLPPHPGHPGYIN[+0.984].F		M[+16], N[+1]	772.374	2	1543.74	1543.74	0	3	17	Non	496.17	437.91	61.34	6.72	2376	>sp|P02817|AMELX_BOVIN Amelogenin, X isoform OS=Bos taurus OX=9913 GN=AMELX PE=1 SV=2	1	hf1_10472_ebo_34_1_261219.ScanId;v=1;d1=10875.10875.2	controllerType=0 controllerNumber=1 scan=10875	26.6242
13331:3	1	S.M[+15.995]PLPPHPGHPGYIN[+0.984].F		M[+16], N[+1]	515.252	3	1543.74	1543.74	0	3.1	17	Non	498.96	498.96	5.29	6.62	2376	>sp|P02817|AMELX_BOVIN Amelogenin, X isoform OS=Bos taurus OX=9913 GN=AMELX PE=1 SV=2	1	hf1_10472_ebo_34_1_261219.ScanId;v=1;d1=11235.11235.3	controllerType=0 controllerNumber=1 scan=11235	27.2501
13043:3	1	S.M[+15.995]PLPPHPGHPGYIN[+0.984].F		M[+16], N[+1]	515.252	3	1543.74	1543.74	0	2.6	17	Non	508.96	508.96	22.31	6.81	2376	>sp|P02817|AMELX_BOVIN Amelogenin, X isoform OS=Bos taurus OX=9913 GN=AMELX PE=1 SV=2	1	hf1_10472_ebo_34_1_261219.ScanId;v=1;d1=11041.11041.3	controllerType=0 controllerNumber=1 scan=11041	26.9101
13635:3	1	S.M[+15.995]PLPPHPGHPGYIN[+0.984].F		M[+16], N[+1]	515.252	3	1543.74	1543.74	0	3.9	17	Non	528.44	528.44	1.74	7.36	2376	>sp|P02817|AMELX_BOVIN Amelogenin, X isoform OS=Bos taurus OX=9913 GN=AMELX PE=1 SV=2	1	hf1_10472_ebo_34_1_261219.ScanId;v=1;d1=11440.11440.3	controllerType=0 controllerNumber=1 scan=11440	27.6041
45933:2	1	S.MPLPPHPGHPGYINF.S			837.424	2	1673.84	1673.83	0	8.8	17	Non	61.19	61.19	61.19	0.32	2376	>sp|P02817|AMELX_BOVIN Amelogenin, X isoform OS=Bos taurus OX=9913 GN=AMELX PE=1 SV=2	1	hf1_10472_ebo_34_1_261219.ScanId;v=1;d1=33082.33082.3	controllerType=0 controllerNumber=1 scan=33082	65.0549
43650:3	1	S.MPLPPHPGHPGYINF.S			558.617	3	1673.84	1673.83	0	7	17	Non	81.43	81.43	81.43	1.06	2376	>sp|P02817|AMELX_BOVIN Amelogenin, X isoform OS=Bos taurus OX=9913 GN=AMELX PE=1 SV=2	1	hf1_10472_ebo_34_1_261219.ScanId;v=1;d1=31576.31576.3	controllerType=0 controllerNumber=1 scan=31576	62.3332
50339:3	1	S.MPLPPHPGHPGYINF.S			558.618	3	1673.84	1673.83	0	8.3	17	Non	131.06	131.06	131.06	0.96	2376	>sp|P02817|AMELX_BOVIN Amelogenin, X isoform OS=Bos taurus OX=9913 GN=AMELX PE=1 SV=2	1	hf1_10472_ebo_34_1_261219.ScanId;v=1;d1=37016.37016.3	controllerType=0 controllerNumber=1 scan=37016	74.7377
45567:3	1	S.MPLPPHPGHPGYINF.S			558.615	3	1673.83	1673.83	0	3.7	17	Non	155.98	155.98	155.98	2.48	2376	>sp|P02817|AMELX_BOVIN Amelogenin, X isoform OS=Bos taurus OX=9913 GN=AMELX PE=1 SV=2	1	hf1_10472_ebo_34_1_261219.ScanId;v=1;d1=32811.32811.3	controllerType=0 controllerNumber=1 scan=32811	64.5283
21590:2	1	S.MPLPPHPGHPGYINF.S			837.42	2	1673.83	1673.83	0	4.8	17	Non	164.71	164.71	164.71	1.35	2376	>sp|P02817|AMELX_BOVIN Amelogenin, X isoform OS=Bos taurus OX=9913 GN=AMELX PE=1 SV=2	1	hf1_10472_ebo_34_1_261219.ScanId;v=1;d1=16949.16949.2	controllerType=0 controllerNumber=1 scan=16949	36.9107
19929:2	1	S.MPLPPHPGHPGYINF.S			837.418	2	1673.83	1673.83	0	1.3	17	Non	186.23	165.85	165.85	1.84	2376	>sp|P02817|AMELX_BOVIN Amelogenin, X isoform OS=Bos taurus OX=9913 GN=AMELX PE=1 SV=2	1	hf1_10472_ebo_34_1_261219.ScanId;v=1;d1=15784.15784.3	controllerType=0 controllerNumber=1 scan=15784	34.9189
50633:3	1	S.MPLPPHPGHPGYINF.S			558.615	3	1673.83	1673.83	0	2.8	17	Non	222.55	222.55	222.55	2.94	2376	>sp|P02817|AMELX_BOVIN Amelogenin, X isoform OS=Bos taurus OX=9913 GN=AMELX PE=1 SV=2	1	hf1_10472_ebo_34_1_261219.ScanId;v=1;d1=37541.37541.3	controllerType=0 controllerNumber=1 scan=37541	77.1302
50715:3	1	S.MPLPPHPGHPGYINF.S			558.615	3	1673.83	1673.83	0	3.4	17	Non	224.91	224.91	224.91	2.94	2376	>sp|P02817|AMELX_BOVIN Amelogenin, X isoform OS=Bos taurus OX=9913 GN=AMELX PE=1 SV=2	1	hf1_10472_ebo_34_1_261219.ScanId;v=1;d1=37691.37691.3	controllerType=0 controllerNumber=1 scan=37691	77.812
46308:2	1	S.MPLPPHPGHPGYINF.S			837.42	2	1673.83	1673.83	0	4.4	17	Non	278.95	268.7	268.7	4.65	2376	>sp|P02817|AMELX_BOVIN Amelogenin, X isoform OS=Bos taurus OX=9913 GN=AMELX PE=1 SV=2	1	hf1_10472_ebo_34_1_261219.ScanId;v=1;d1=33398.33398.3	controllerType=0 controllerNumber=1 scan=33398	65.7374
21553:3	1	S.MPLPPHPGHPGYINF.S			558.618	3	1673.84	1673.83	0	8.8	17	Non	365.91	305.79	305.79	4.42	2376	>sp|P02817|AMELX_BOVIN Amelogenin, X isoform OS=Bos taurus OX=9913 GN=AMELX PE=1 SV=2	1	hf1_10472_ebo_34_1_261219.ScanId;v=1;d1=16924.16924.3	controllerType=0 controllerNumber=1 scan=16924	36.8681
50510:3	1	S.MPLPPHPGHPGYINF.S			558.616	3	1673.83	1673.83	0	5.1	17	Non	374.92	374.92	374.92	6.33	2376	>sp|P02817|AMELX_BOVIN Amelogenin, X isoform OS=Bos taurus OX=9913 GN=AMELX PE=1 SV=2	1	hf1_10472_ebo_34_1_261219.ScanId;v=1;d1=37374.37374.3	controllerType=0 controllerNumber=1 scan=37374	76.4463
27933:3	1	S.MPLPPHPGHPGYINF.S			558.616	3	1673.83	1673.83	0	5.2	17	Non	378.81	356.24	356.24	5.33	2376	>sp|P02817|AMELX_BOVIN Amelogenin, X isoform OS=Bos taurus OX=9913 GN=AMELX PE=1 SV=2	1	hf1_10472_ebo_34_1_261219.ScanId;v=1;d1=21217.21217.3	controllerType=0 controllerNumber=1 scan=21217	44.1056
50601:3	1	S.MPLPPHPGHPGYINF.S			558.618	3	1673.84	1673.83	0	7.5	17	Non	379.42	379.42	379.42	6.61	2376	>sp|P02817|AMELX_BOVIN Amelogenin, X isoform OS=Bos taurus OX=9913 GN=AMELX PE=1 SV=2	1	hf1_10472_ebo_34_1_261219.ScanId;v=1;d1=37471.37471.3	controllerType=0 controllerNumber=1 scan=37471	76.7851
48409:3	1	S.MPLPPHPGHPGYINF.S			558.616	3	1673.84	1673.83	0	5.6	17	Non	394.1	374.33	374.33	6.31	2376	>sp|P02817|AMELX_BOVIN Amelogenin, X isoform OS=Bos taurus OX=9913 GN=AMELX PE=1 SV=2	1	hf1_10472_ebo_34_1_261219.ScanId;v=1;d1=35263.35263.3	controllerType=0 controllerNumber=1 scan=35263	70.2073
46717:3	1	S.MPLPPHPGHPGYINF.S			558.614	3	1673.83	1673.83	0	1.4	17	Non	401.08	399.47	399.47	5.99	2376	>sp|P02817|AMELX_BOVIN Amelogenin, X isoform OS=Bos taurus OX=9913 GN=AMELX PE=1 SV=2	1	hf1_10472_ebo_34_1_261219.ScanId;v=1;d1=33783.33783.3	controllerType=0 controllerNumber=1 scan=33783	66.6911
49243:3	1	S.MPLPPHPGHPGYINF.S			558.615	3	1673.83	1673.83	0	2.4	17	Non	412.61	405.95	405.95	5.99	2376	>sp|P02817|AMELX_BOVIN Amelogenin, X isoform OS=Bos taurus OX=9913 GN=AMELX PE=1 SV=2	1	hf1_10472_ebo_34_1_261219.ScanId;v=1;d1=35987.35987.3	controllerType=0 controllerNumber=1 scan=35987	71.8982
23061:3	1	S.MPLPPHPGHPGYINF.S			558.618	3	1673.84	1673.83	0	8.8	17	Non	414.12	326.22	326.22	4.45	2376	>sp|P02817|AMELX_BOVIN Amelogenin, X isoform OS=Bos taurus OX=9913 GN=AMELX PE=1 SV=2	1	hf1_10472_ebo_34_1_261219.ScanId;v=1;d1=17945.17945.3	controllerType=0 controllerNumber=1 scan=17945	38.5976
25868:3	1	S.MPLPPHPGHPGYINF.S			558.615	3	1673.83	1673.83	0	2.8	17	Non	415.75	357.31	357.31	5.24	2376	>sp|P02817|AMELX_BOVIN Amelogenin, X isoform OS=Bos taurus OX=9913 GN=AMELX PE=1 SV=2	1	hf1_10472_ebo_34_1_261219.ScanId;v=1;d1=19815.19815.3	controllerType=0 controllerNumber=1 scan=19815	41.7433
47228:3	1	S.MPLPPHPGHPGYINF.S			558.616	3	1673.83	1673.83	0	5.3	17	Non	416.92	416.92	416.92	6.6	2376	>sp|P02817|AMELX_BOVIN Amelogenin, X isoform OS=Bos taurus OX=9913 GN=AMELX PE=1 SV=2	1	hf1_10472_ebo_34_1_261219.ScanId;v=1;d1=34221.34221.3	controllerType=0 controllerNumber=1 scan=34221	67.7134
48093:3	1	S.MPLPPHPGHPGYINF.S			558.616	3	1673.83	1673.83	0	4.6	17	Non	417.8	415.66	415.66	6.6	2376	>sp|P02817|AMELX_BOVIN Amelogenin, X isoform OS=Bos taurus OX=9913 GN=AMELX PE=1 SV=2	1	hf1_10472_ebo_34_1_261219.ScanId;v=1;d1=34984.34984.3	controllerType=0 controllerNumber=1 scan=34984	69.5283
49088:3	1	S.MPLPPHPGHPGYINF.S			558.616	3	1673.83	1673.83	0	4.6	17	Non	421.88	410.61	410.61	6.69	2376	>sp|P02817|AMELX_BOVIN Amelogenin, X isoform OS=Bos taurus OX=9913 GN=AMELX PE=1 SV=2	1	hf1_10472_ebo_34_1_261219.ScanId;v=1;d1=35846.35846.3	controllerType=0 controllerNumber=1 scan=35846	71.5599
24310:3	1	S.MPLPPHPGHPGYINF.S			558.616	3	1673.83	1673.83	0	4.5	17	Non	424.3	367.87	367.87	6.27	2376	>sp|P02817|AMELX_BOVIN Amelogenin, X isoform OS=Bos taurus OX=9913 GN=AMELX PE=1 SV=2	1	hf1_10472_ebo_34_1_261219.ScanId;v=1;d1=18773.18773.3	controllerType=0 controllerNumber=1 scan=18773	39.9948
49686:3	1	S.MPLPPHPGHPGYINF.S			558.615	3	1673.83	1673.83	0	1.9	17	Non	424.76	424.76	424.76	6.08	2376	>sp|P02817|AMELX_BOVIN Amelogenin, X isoform OS=Bos taurus OX=9913 GN=AMELX PE=1 SV=2	1	hf1_10472_ebo_34_1_261219.ScanId;v=1;d1=36404.36404.3	controllerType=0 controllerNumber=1 scan=36404	72.9372
26198:3	1	S.MPLPPHPGHPGYINF.S			558.615	3	1673.83	1673.83	0	3.3	17	Non	430.35	390.3	390.3	6.27	2376	>sp|P02817|AMELX_BOVIN Amelogenin, X isoform OS=Bos taurus OX=9913 GN=AMELX PE=1 SV=2	1	hf1_10472_ebo_34_1_261219.ScanId;v=1;d1=20029.20029.3	controllerType=0 controllerNumber=1 scan=20029	42.0994
48909:3	1	S.MPLPPHPGHPGYINF.S			558.614	3	1673.83	1673.83	0	0.7	17	Non	433.14	395.43	395.43	5.97	2376	>sp|P02817|AMELX_BOVIN Amelogenin, X isoform OS=Bos taurus OX=9913 GN=AMELX PE=1 SV=2	1	hf1_10472_ebo_34_1_261219.ScanId;v=1;d1=35696.35696.3	controllerType=0 controllerNumber=1 scan=35696	71.2206
26900:3	1	S.MPLPPHPGHPGYINF.S			558.617	3	1673.84	1673.83	0	5.9	17	Non	434.38	412.92	412.92	6.45	2376	>sp|P02817|AMELX_BOVIN Amelogenin, X isoform OS=Bos taurus OX=9913 GN=AMELX PE=1 SV=2	1	hf1_10472_ebo_34_1_261219.ScanId;v=1;d1=20501.20501.3	controllerType=0 controllerNumber=1 scan=20501	42.8992
21853:3	1	S.MPLPPHPGHPGYINF.S			558.619	3	1673.84	1673.83	0	9.3	17	Non	438.74	385.18	385.18	5.87	2376	>sp|P02817|AMELX_BOVIN Amelogenin, X isoform OS=Bos taurus OX=9913 GN=AMELX PE=1 SV=2	1	hf1_10472_ebo_34_1_261219.ScanId;v=1;d1=17124.17124.3	controllerType=0 controllerNumber=1 scan=17124	37.2103
25253:3	1	S.MPLPPHPGHPGYINF.S			558.616	3	1673.83	1673.83	0	4.6	17	Non	447.62	396.91	396.91	6.45	2376	>sp|P02817|AMELX_BOVIN Amelogenin, X isoform OS=Bos taurus OX=9913 GN=AMELX PE=1 SV=2	1	hf1_10472_ebo_34_1_261219.ScanId;v=1;d1=19402.19402.3	controllerType=0 controllerNumber=1 scan=19402	41.0475
48603:3	1	S.MPLPPHPGHPGYINF.S			558.616	3	1673.83	1673.83	0	4.4	17	Non	452.78	437.36	437.36	6.5	2376	>sp|P02817|AMELX_BOVIN Amelogenin, X isoform OS=Bos taurus OX=9913 GN=AMELX PE=1 SV=2	1	hf1_10472_ebo_34_1_261219.ScanId;v=1;d1=35418.35418.3	controllerType=0 controllerNumber=1 scan=35418	70.5478
22746:3	1	S.MPLPPHPGHPGYINF.S			558.618	3	1673.84	1673.83	0	8.6	17	Non	457.51	411.3	411.3	5.89	2376	>sp|P02817|AMELX_BOVIN Amelogenin, X isoform OS=Bos taurus OX=9913 GN=AMELX PE=1 SV=2	1	hf1_10472_ebo_34_1_261219.ScanId;v=1;d1=17736.17736.3	controllerType=0 controllerNumber=1 scan=17736	38.2486
22159:3	1	S.MPLPPHPGHPGYINF.S			558.617	3	1673.84	1673.83	0	7.3	17	Non	461.14	433.51	433.51	6.71	2376	>sp|P02817|AMELX_BOVIN Amelogenin, X isoform OS=Bos taurus OX=9913 GN=AMELX PE=1 SV=2	1	hf1_10472_ebo_34_1_261219.ScanId;v=1;d1=17328.17328.3	controllerType=0 controllerNumber=1 scan=17328	37.5543
47359:3	1	S.MPLPPHPGHPGYINF.S			558.616	3	1673.83	1673.83	0	4.2	17	Non	464.23	442	442	6.48	2376	>sp|P02817|AMELX_BOVIN Amelogenin, X isoform OS=Bos taurus OX=9913 GN=AMELX PE=1 SV=2	1	hf1_10472_ebo_34_1_261219.ScanId;v=1;d1=34347.34347.3	controllerType=0 controllerNumber=1 scan=34347	68.05
24942:3	1	S.MPLPPHPGHPGYINF.S			558.616	3	1673.83	1673.83	0	4.7	17	Non	466.09	418.22	418.22	6.66	2376	>sp|P02817|AMELX_BOVIN Amelogenin, X isoform OS=Bos taurus OX=9913 GN=AMELX PE=1 SV=2	1	hf1_10472_ebo_34_1_261219.ScanId;v=1;d1=19191.19191.3	controllerType=0 controllerNumber=1 scan=19191	40.6993
24629:3	1	S.MPLPPHPGHPGYINF.S			558.615	3	1673.83	1673.83	0	3	17	Non	469.14	421.35	421.35	6.25	2376	>sp|P02817|AMELX_BOVIN Amelogenin, X isoform OS=Bos taurus OX=9913 GN=AMELX PE=1 SV=2	1	hf1_10472_ebo_34_1_261219.ScanId;v=1;d1=18985.18985.3	controllerType=0 controllerNumber=1 scan=18985	40.3527
25550:3	1	S.MPLPPHPGHPGYINF.S			558.616	3	1673.83	1673.83	0	5.2	17	Non	470.15	403.44	403.44	6.66	2376	>sp|P02817|AMELX_BOVIN Amelogenin, X isoform OS=Bos taurus OX=9913 GN=AMELX PE=1 SV=2	1	hf1_10472_ebo_34_1_261219.ScanId;v=1;d1=19605.19605.3	controllerType=0 controllerNumber=1 scan=19605	41.3908
22464:3	1	S.MPLPPHPGHPGYINF.S			558.617	3	1673.84	1673.83	0	7.3	17	Non	474.99	438.56	438.56	6.76	2376	>sp|P02817|AMELX_BOVIN Amelogenin, X isoform OS=Bos taurus OX=9913 GN=AMELX PE=1 SV=2	1	hf1_10472_ebo_34_1_261219.ScanId;v=1;d1=17539.17539.3	controllerType=0 controllerNumber=1 scan=17539	37.909
23217:2	1	S.MPLPPHPGHPGYINF.S			837.421	2	1673.83	1673.83	0	5.5	17	Non	518.22	435.3	435.3	7.19	2376	>sp|P02817|AMELX_BOVIN Amelogenin, X isoform OS=Bos taurus OX=9913 GN=AMELX PE=1 SV=2	1	hf1_10472_ebo_34_1_261219.ScanId;v=1;d1=18047.18047.2	controllerType=0 controllerNumber=1 scan=18047	38.7696
21697:2	1	S.MPLPPHPGHPGYINF.S			837.421	2	1673.83	1673.83	0	5.5	17	Non	626.6	542.67	542.67	9.74	2376	>sp|P02817|AMELX_BOVIN Amelogenin, X isoform OS=Bos taurus OX=9913 GN=AMELX PE=1 SV=2	1	hf1_10472_ebo_34_1_261219.ScanId;v=1;d1=17023.17023.2	controllerType=0 controllerNumber=1 scan=17023	37.0375
21401:2	1	S.MPLPPHPGHPGYINF.S			837.421	2	1673.83	1673.83	0	5.2	17	Non	633.48	499.95	499.95	9.08	2376	>sp|P02817|AMELX_BOVIN Amelogenin, X isoform OS=Bos taurus OX=9913 GN=AMELX PE=1 SV=2	1	hf1_10472_ebo_34_1_261219.ScanId;v=1;d1=16814.16814.2	controllerType=0 controllerNumber=1 scan=16814	36.6857
22317:2	1	S.MPLPPHPGHPGYINF.S			837.421	2	1673.83	1673.83	0	4.9	17	Non	686.35	642.74	642.74	10.74	2376	>sp|P02817|AMELX_BOVIN Amelogenin, X isoform OS=Bos taurus OX=9913 GN=AMELX PE=1 SV=2	1	hf1_10472_ebo_34_1_261219.ScanId;v=1;d1=17438.17438.2	controllerType=0 controllerNumber=1 scan=17438	37.7368
22023:2	1	S.MPLPPHPGHPGYINF.S			837.421	2	1673.83	1673.83	0	5.1	17	Non	696.94	576.49	576.49	10.74	2376	>sp|P02817|AMELX_BOVIN Amelogenin, X isoform OS=Bos taurus OX=9913 GN=AMELX PE=1 SV=2	1	hf1_10472_ebo_34_1_261219.ScanId;v=1;d1=17234.17234.2	controllerType=0 controllerNumber=1 scan=17234	37.3914
22610:2	1	S.MPLPPHPGHPGYINF.S			837.421	2	1673.83	1673.83	0	5.3	17	Non	718.94	624.97	624.97	11.74	2376	>sp|P02817|AMELX_BOVIN Amelogenin, X isoform OS=Bos taurus OX=9913 GN=AMELX PE=1 SV=2	1	hf1_10472_ebo_34_1_261219.ScanId;v=1;d1=17643.17643.2	controllerType=0 controllerNumber=1 scan=17643	38.0901
22913:2	1	S.MPLPPHPGHPGYINF.S			837.421	2	1673.83	1673.83	0	5.4	17	Non	727.99	634.08	634.08	11.74	2376	>sp|P02817|AMELX_BOVIN Amelogenin, X isoform OS=Bos taurus OX=9913 GN=AMELX PE=1 SV=2	1	hf1_10472_ebo_34_1_261219.ScanId;v=1;d1=17846.17846.2	controllerType=0 controllerNumber=1 scan=17846	38.4319
00203:3	1	S.MP[+15.995]LPPHPGHPGYINF.S		P[+16]	563.947	3	1689.83	1689.82	0	3	17	Non	3.83	3.83	3.83	0.55	2376	>sp|P02817|AMELX_BOVIN Amelogenin, X isoform OS=Bos taurus OX=9913 GN=AMELX PE=1 SV=2	1	hf1_10472_ebo_34_1_261219.ScanId;v=1;d1=1417.1417.3	controllerType=0 controllerNumber=1 scan=1417	7.8736
00086:3	1	S.MP[+15.995]LPPHPGHPGYINF.S		P[+16]	563.947	3	1689.83	1689.82	0	3.7	17	Non	5	5	4	0.55	2376	>sp|P02817|AMELX_BOVIN Amelogenin, X isoform OS=Bos taurus OX=9913 GN=AMELX PE=1 SV=2	1	hf1_10472_ebo_34_1_261219.ScanId;v=1;d1=431.431.3	controllerType=0 controllerNumber=1 scan=431	2.3018
43172:3	1	S.MP[+15.995]LPPHPGHPGYINF.S		P[+16]	563.947	3	1689.83	1689.82	0	3.2	17	Non	21.67	21.67	4	0.25	2376	>sp|P02817|AMELX_BOVIN Amelogenin, X isoform OS=Bos taurus OX=9913 GN=AMELX PE=1 SV=2	1	hf1_10472_ebo_34_1_261219.ScanId;v=1;d1=31269.31269.3	controllerType=0 controllerNumber=1 scan=31269	61.7886
41742:3	1	S.MP[+15.995]LPPHPGHPGYINF.S		P[+16]	563.947	3	1689.83	1689.82	0	3.8	17	Non	25.62	25.62	4	0.25	2376	>sp|P02817|AMELX_BOVIN Amelogenin, X isoform OS=Bos taurus OX=9913 GN=AMELX PE=1 SV=2	1	hf1_10472_ebo_34_1_261219.ScanId;v=1;d1=30354.30354.3	controllerType=0 controllerNumber=1 scan=30354	60.1592
00205:3	1	S.MP[+15.995]LPPHPGHPGYINF.S		P[+16]	563.947	3	1689.83	1689.82	0	3.3	17	Non	29.66	29.66	4	0.55	2376	>sp|P02817|AMELX_BOVIN Amelogenin, X isoform OS=Bos taurus OX=9913 GN=AMELX PE=1 SV=2	1	hf1_10472_ebo_34_1_261219.ScanId;v=1;d1=1476.1476.3	controllerType=0 controllerNumber=1 scan=1476	8.2148
45652:3	1	S.MP[+15.995]LPPHPGHPGYINF.S		P[+16]	563.947	3	1689.83	1689.82	0	3.2	17	Non	33.89	33.89	4	0.25	2376	>sp|P02817|AMELX_BOVIN Amelogenin, X isoform OS=Bos taurus OX=9913 GN=AMELX PE=1 SV=2	1	hf1_10472_ebo_34_1_261219.ScanId;v=1;d1=32871.32871.3	controllerType=0 controllerNumber=1 scan=32871	64.6362
00082:3	1	S.MP[+15.995]LPPHPGHPGYINF.S		P[+16]	563.948	3	1689.83	1689.82	0	5.4	17	Non	35.85	35.85	4	0.34	2376	>sp|P02817|AMELX_BOVIN Amelogenin, X isoform OS=Bos taurus OX=9913 GN=AMELX PE=1 SV=2	1	hf1_10472_ebo_34_1_261219.ScanId;v=1;d1=374.374.3	controllerType=0 controllerNumber=1 scan=374	1.9625
00201:3	1	S.MP[+15.995]LPPHPGHPGYINF.S		P[+16]	563.947	3	1689.83	1689.82	0	3.4	17	Non	35.97	35.97	4	0.55	2376	>sp|P02817|AMELX_BOVIN Amelogenin, X isoform OS=Bos taurus OX=9913 GN=AMELX PE=1 SV=2	1	hf1_10472_ebo_34_1_261219.ScanId;v=1;d1=1358.1358.3	controllerType=0 controllerNumber=1 scan=1358	7.5311
00209:3	1	S.MP[+15.995]LPPHPGHPGYINF.S		P[+16]	563.947	3	1689.83	1689.82	0	3.4	17	Non	48.33	48.33	4	0.71	2376	>sp|P02817|AMELX_BOVIN Amelogenin, X isoform OS=Bos taurus OX=9913 GN=AMELX PE=1 SV=2	1	hf1_10472_ebo_34_1_261219.ScanId;v=1;d1=1594.1594.3	controllerType=0 controllerNumber=1 scan=1594	8.8968
00187:3	1	S.MP[+15.995]LPPHPGHPGYINF.S		P[+16]	563.948	3	1689.83	1689.82	0	6	17	Non	49.71	49.71	4	0.83	2376	>sp|P02817|AMELX_BOVIN Amelogenin, X isoform OS=Bos taurus OX=9913 GN=AMELX PE=1 SV=2	1	hf1_10472_ebo_34_1_261219.ScanId;v=1;d1=953.953.3	controllerType=0 controllerNumber=1 scan=953	5.149
00080:3	1	S.MP[+15.995]LPPHPGHPGYINF.S		P[+16]	563.948	3	1689.83	1689.82	0	5.7	17	Non	51.91	51.91	4	0.83	2376	>sp|P02817|AMELX_BOVIN Amelogenin, X isoform OS=Bos taurus OX=9913 GN=AMELX PE=1 SV=2	1	hf1_10472_ebo_34_1_261219.ScanId;v=1;d1=317.317.3	controllerType=0 controllerNumber=1 scan=317	1.6202
28157:3	1	S.MP[+15.995]LPPHPGHPGYINF.S		P[+16]	563.948	3	1689.83	1689.82	0	5.4	17	Non	65.17	65.17	5.8	0.49	2376	>sp|P02817|AMELX_BOVIN Amelogenin, X isoform OS=Bos taurus OX=9913 GN=AMELX PE=1 SV=2	1	hf1_10472_ebo_34_1_261219.ScanId;v=1;d1=21375.21375.2	controllerType=0 controllerNumber=1 scan=21375	44.3775
00181:3	1	S.MP[+15.995]LPPHPGHPGYINF.S		P[+16]	563.947	3	1689.82	1689.82	0	2.5	17	Non	77.24	77.24	4	0.57	2376	>sp|P02817|AMELX_BOVIN Amelogenin, X isoform OS=Bos taurus OX=9913 GN=AMELX PE=1 SV=2	1	hf1_10472_ebo_34_1_261219.ScanId;v=1;d1=894.894.3	controllerType=0 controllerNumber=1 scan=894	4.8067
00189:3	1	S.MP[+15.995]LPPHPGHPGYINF.S		P[+16]	563.948	3	1689.83	1689.82	0	6.1	17	Non	81.17	81.17	4	0.99	2376	>sp|P02817|AMELX_BOVIN Amelogenin, X isoform OS=Bos taurus OX=9913 GN=AMELX PE=1 SV=2	1	hf1_10472_ebo_34_1_261219.ScanId;v=1;d1=1010.1010.3	controllerType=0 controllerNumber=1 scan=1010	5.4877
20047:3	1	S.MP[+31.990]LPPHPGHPGYINF.S		P[+32]	569.279	3	1705.82	1705.82	0	3.7	17	Non	89.65	43.57	1.8	0.43	2376	>sp|P02817|AMELX_BOVIN Amelogenin, X isoform OS=Bos taurus OX=9913 GN=AMELX PE=1 SV=2	1	hf1_10472_ebo_34_1_261219.ScanId;v=1;d1=15869.15869.3	controllerType=0 controllerNumber=1 scan=15869	35.0633
27863:3	1	S.MP[+15.995]LPPHPGHPGYINF.S		P[+16]	563.947	3	1689.83	1689.82	0	3.5	17	Non	96.2	96.2	5.8	0.48	2376	>sp|P02817|AMELX_BOVIN Amelogenin, X isoform OS=Bos taurus OX=9913 GN=AMELX PE=1 SV=2	1	hf1_10472_ebo_34_1_261219.ScanId;v=1;d1=21166.21166.2	controllerType=0 controllerNumber=1 scan=21166	44.0217
49906:3	1	S.MPLPPHPGHPGY[+31.990]INF.S		Y[+32]	569.278	3	1705.82	1705.82	0	2.1	17	Non	114.62	114.62	0	0.57	2376	>sp|P02817|AMELX_BOVIN Amelogenin, X isoform OS=Bos taurus OX=9913 GN=AMELX PE=1 SV=2	1	hf1_10472_ebo_34_1_261219.ScanId;v=1;d1=36598.36598.3	controllerType=0 controllerNumber=1 scan=36598	73.4153
45375:3	1	S.MP[+15.995]LPPHPGHPGYINF.S		P[+16]	563.95	3	1689.84	1689.82	0	8.6	17	Non	116.9	116.9	4	0.54	2376	>sp|P02817|AMELX_BOVIN Amelogenin, X isoform OS=Bos taurus OX=9913 GN=AMELX PE=1 SV=2	1	hf1_10472_ebo_34_1_261219.ScanId;v=1;d1=32679.32679.3	controllerType=0 controllerNumber=1 scan=32679	64.294
00195:3	1	S.MP[+15.995]LPPHPGHPGYINF.S		P[+16]	563.947	3	1689.83	1689.82	0	3.8	17	Non	135.39	135.39	4	1.45	2376	>sp|P02817|AMELX_BOVIN Amelogenin, X isoform OS=Bos taurus OX=9913 GN=AMELX PE=1 SV=2	1	hf1_10472_ebo_34_1_261219.ScanId;v=1;d1=1182.1182.3	controllerType=0 controllerNumber=1 scan=1182	6.5069
00213:3	1	S.MP[+15.995]LPPHPGHPGYINF.S		P[+16]	563.947	3	1689.83	1689.82	0	3.5	17	Non	144.25	144.25	4	1.45	2376	>sp|P02817|AMELX_BOVIN Amelogenin, X isoform OS=Bos taurus OX=9913 GN=AMELX PE=1 SV=2	1	hf1_10472_ebo_34_1_261219.ScanId;v=1;d1=1653.1653.3	controllerType=0 controllerNumber=1 scan=1653	9.2351
18130:2	1	S.MP[+15.995]LPPHPGHPGYINF.S		P[+16]	845.419	2	1689.83	1689.82	0	6.3	17	Non	149.29	149.29	3.39	2.41	2376	>sp|P02817|AMELX_BOVIN Amelogenin, X isoform OS=Bos taurus OX=9913 GN=AMELX PE=1 SV=2	1	hf1_10472_ebo_34_1_261219.ScanId;v=1;d1=14510.14510.3	controllerType=0 controllerNumber=1 scan=14510	32.7557
00256:3	1	S.MP[+15.995]LPPHPGHPGYINF.S		P[+16]	563.947	3	1689.83	1689.82	0	3.7	17	Non	160.06	160.06	4	2.48	2376	>sp|P02817|AMELX_BOVIN Amelogenin, X isoform OS=Bos taurus OX=9913 GN=AMELX PE=1 SV=2	1	hf1_10472_ebo_34_1_261219.ScanId;v=1;d1=1786.1786.3	controllerType=0 controllerNumber=1 scan=1786	9.9172
33737:2	1	S.M[+15.995]PLPPHPGHPGYINF.S		M[+16]	845.412	2	1689.82	1689.82	0	-2	17	Non	163.37	122.91	4.1	0.36	2376	>sp|P02817|AMELX_BOVIN Amelogenin, X isoform OS=Bos taurus OX=9913 GN=AMELX PE=1 SV=2	1	hf1_10472_ebo_34_1_261219.ScanId;v=1;d1=25101.25101.4	controllerType=0 controllerNumber=1 scan=25101	50.806
00193:3	1	S.MP[+15.995]LPPHPGHPGYINF.S		P[+16]	563.946	3	1689.82	1689.82	0	2.1	17	Non	169.02	169.02	4	2.52	2376	>sp|P02817|AMELX_BOVIN Amelogenin, X isoform OS=Bos taurus OX=9913 GN=AMELX PE=1 SV=2	1	hf1_10472_ebo_34_1_261219.ScanId;v=1;d1=1124.1124.3	controllerType=0 controllerNumber=1 scan=1124	6.1664
50331:3	1	S.MP[+15.995]LPPHPGHPGYINF.S		P[+16]	563.949	3	1689.83	1689.82	0	7.8	17	Non	172.47	172.47	4	2.6	2376	>sp|P02817|AMELX_BOVIN Amelogenin, X isoform OS=Bos taurus OX=9913 GN=AMELX PE=1 SV=2	1	hf1_10472_ebo_34_1_261219.ScanId;v=1;d1=37001.37001.3	controllerType=0 controllerNumber=1 scan=37001	74.659
50665:3	1	S.MP[+15.995]LPPHPGHPGYINF.S		P[+16]	563.949	3	1689.83	1689.82	0	6.9	17	Non	194.09	194.09	4	2.95	2376	>sp|P02817|AMELX_BOVIN Amelogenin, X isoform OS=Bos taurus OX=9913 GN=AMELX PE=1 SV=2	1	hf1_10472_ebo_34_1_261219.ScanId;v=1;d1=37595.37595.3	controllerType=0 controllerNumber=1 scan=37595	77.3704
19181:3	1	S.MP[+31.990]LPPHPGHPGYINF.S		P[+32]	569.277	3	1705.82	1705.82	0	1.1	17	Non	207.27	207.27	0	2.46	2376	>sp|P02817|AMELX_BOVIN Amelogenin, X isoform OS=Bos taurus OX=9913 GN=AMELX PE=1 SV=2	1	hf1_10472_ebo_34_1_261219.ScanId;v=1;d1=15248.15248.3	controllerType=0 controllerNumber=1 scan=15248	34.0087
16448:3	1	S.MP[+15.995]LPPHPGHPGYINF.S		P[+16]	563.948	3	1689.83	1689.82	0	6.2	17	Non	247.44	247.44	0.82	4.11	2376	>sp|P02817|AMELX_BOVIN Amelogenin, X isoform OS=Bos taurus OX=9913 GN=AMELX PE=1 SV=2	1	hf1_10472_ebo_34_1_261219.ScanId;v=1;d1=13331.13331.3	controllerType=0 controllerNumber=1 scan=13331	30.7639
16555:3	1	S.MP[+15.995]LPPHPGHPGYINF.S		P[+16]	563.948	3	1689.83	1689.82	0	6.2	17	Non	263.03	263.03	8.59	4.25	2376	>sp|P02817|AMELX_BOVIN Amelogenin, X isoform OS=Bos taurus OX=9913 GN=AMELX PE=1 SV=2	1	hf1_10472_ebo_34_1_261219.ScanId;v=1;d1=13398.13398.3	controllerType=0 controllerNumber=1 scan=13398	30.8764
18301:3	1	S.MP[+15.995]LPPHPGHPGYINF.S		P[+16]	563.95	3	1689.84	1689.82	0	9.6	17	Non	264.19	264.19	4	3.6	2376	>sp|P02817|AMELX_BOVIN Amelogenin, X isoform OS=Bos taurus OX=9913 GN=AMELX PE=1 SV=2	1	hf1_10472_ebo_34_1_261219.ScanId;v=1;d1=14629.14629.3	controllerType=0 controllerNumber=1 scan=14629	32.9588
49640:2	1	S.M[+15.995]PLPPHPGHPGYINF.S		M[+16]	845.419	2	1689.83	1689.82	0	6	17	Non	280.04	280.04	35.29	5.63	2376	>sp|P02817|AMELX_BOVIN Amelogenin, X isoform OS=Bos taurus OX=9913 GN=AMELX PE=1 SV=2	1	hf1_10472_ebo_34_1_261219.ScanId;v=1;d1=36361.36361.2	controllerType=0 controllerNumber=1 scan=36361	72.8266
50713:3	1	S.MP[+15.995]LPPHPGHPGYINF.S		P[+16]	563.949	3	1689.83	1689.82	0	7.8	17	Non	283.35	283.35	4	5	2376	>sp|P02817|AMELX_BOVIN Amelogenin, X isoform OS=Bos taurus OX=9913 GN=AMELX PE=1 SV=2	1	hf1_10472_ebo_34_1_261219.ScanId;v=1;d1=37674.37674.3	controllerType=0 controllerNumber=1 scan=37674	77.7116
20573:3	1	S.MP[+15.995]LPPHPGHPGYINF.S		P[+16]	563.947	3	1689.83	1689.82	0	3.4	17	Non	289.53	289.53	5.8	4.43	2376	>sp|P02817|AMELX_BOVIN Amelogenin, X isoform OS=Bos taurus OX=9913 GN=AMELX PE=1 SV=2	1	hf1_10472_ebo_34_1_261219.ScanId;v=1;d1=16243.16243.3	controllerType=0 controllerNumber=1 scan=16243	35.706
00464:3	1	S.MP[+15.995]LPPHPGHPGYINF.S		P[+16]	563.947	3	1689.83	1689.82	0	4	17	Non	292.05	292.05	4	4.91	2376	>sp|P02817|AMELX_BOVIN Amelogenin, X isoform OS=Bos taurus OX=9913 GN=AMELX PE=1 SV=2	1	hf1_10472_ebo_34_1_261219.ScanId;v=1;d1=2158.2158.3	controllerType=0 controllerNumber=1 scan=2158	11.627
47974:3	1	S.M[+15.995]PLPPHPGHPGYINF.S		M[+16]	563.947	3	1689.83	1689.82	0	4.3	17	Non	296.95	296.95	8.92	4.91	2376	>sp|P02817|AMELX_BOVIN Amelogenin, X isoform OS=Bos taurus OX=9913 GN=AMELX PE=1 SV=2	1	hf1_10472_ebo_34_1_261219.ScanId;v=1;d1=34876.34876.3	controllerType=0 controllerNumber=1 scan=34876	69.2586
00227:3	1	S.MP[+15.995]LPPHPGHPGYINF.S		P[+16]	563.947	3	1689.83	1689.82	0	3.5	17	Non	308.64	308.64	4	4.96	2376	>sp|P02817|AMELX_BOVIN Amelogenin, X isoform OS=Bos taurus OX=9913 GN=AMELX PE=1 SV=2	1	hf1_10472_ebo_34_1_261219.ScanId;v=1;d1=1716.1716.3	controllerType=0 controllerNumber=1 scan=1716	9.5777
48957:3	1	S.MP[+15.995]LPPHPGHPGYINF.S		P[+16]	563.948	3	1689.83	1689.82	0	5	17	Non	314.25	314.25	4	5.01	2376	>sp|P02817|AMELX_BOVIN Amelogenin, X isoform OS=Bos taurus OX=9913 GN=AMELX PE=1 SV=2	1	hf1_10472_ebo_34_1_261219.ScanId;v=1;d1=35736.35736.3	controllerType=0 controllerNumber=1 scan=35736	71.3152
21502:3	1	S.MP[+31.990]LPPHPGHPGYINF.S		P[+32]	569.278	3	1705.82	1705.82	0	2.8	17	Non	322.35	322.35	1.8	4.06	2376	>sp|P02817|AMELX_BOVIN Amelogenin, X isoform OS=Bos taurus OX=9913 GN=AMELX PE=1 SV=2	1	hf1_10472_ebo_34_1_261219.ScanId;v=1;d1=16887.16887.3	controllerType=0 controllerNumber=1 scan=16887	36.805
26582:3	1	S.MP[+15.995]LPPHPGHPGYINF.S		P[+16]	563.948	3	1689.83	1689.82	0	5.1	17	Non	326.33	326.33	5.8	4.66	2376	>sp|P02817|AMELX_BOVIN Amelogenin, X isoform OS=Bos taurus OX=9913 GN=AMELX PE=1 SV=2	1	hf1_10472_ebo_34_1_261219.ScanId;v=1;d1=20288.20288.3	controllerType=0 controllerNumber=1 scan=20288	42.5365
48784:2	1	S.M[+15.995]PLPPHPGHPGYINF.S		M[+16]	845.42	2	1689.83	1689.82	0	7.7	17	Non	335.17	335.17	12.62	5.25	2376	>sp|P02817|AMELX_BOVIN Amelogenin, X isoform OS=Bos taurus OX=9913 GN=AMELX PE=1 SV=2	1	hf1_10472_ebo_34_1_261219.ScanId;v=1;d1=35582.35582.2	controllerType=0 controllerNumber=1 scan=35582	70.9412
18881:3	1	S.MP[+15.995]LPPHPGHPGYINF.S		P[+16]	563.949	3	1689.83	1689.82	0	7	17	Non	335.64	335.64	4	5.27	2376	>sp|P02817|AMELX_BOVIN Amelogenin, X isoform OS=Bos taurus OX=9913 GN=AMELX PE=1 SV=2	1	hf1_10472_ebo_34_1_261219.ScanId;v=1;d1=15033.15033.3	controllerType=0 controllerNumber=1 scan=15033	33.6447
20865:3	1	S.MP[+15.995]LPPHPGHPGYINF.S		P[+16]	563.947	3	1689.83	1689.82	0	3.5	17	Non	335.68	335.68	5.8	4.98	2376	>sp|P02817|AMELX_BOVIN Amelogenin, X isoform OS=Bos taurus OX=9913 GN=AMELX PE=1 SV=2	1	hf1_10472_ebo_34_1_261219.ScanId;v=1;d1=16447.16447.3	controllerType=0 controllerNumber=1 scan=16447	36.0591
20307:3	1	S.MP[+15.995]LPPHPGHPGYINF.S		P[+16]	563.948	3	1689.83	1689.82	0	4.6	17	Non	336.83	336.83	5.8	5.16	2376	>sp|P02817|AMELX_BOVIN Amelogenin, X isoform OS=Bos taurus OX=9913 GN=AMELX PE=1 SV=2	1	hf1_10472_ebo_34_1_261219.ScanId;v=1;d1=16048.16048.3	controllerType=0 controllerNumber=1 scan=16048	35.3684
50587:3	1	S.MP[+15.995]LPPHPGHPGYINF.S		P[+16]	563.948	3	1689.83	1689.82	0	5	17	Non	337.75	337.75	4	5.16	2376	>sp|P02817|AMELX_BOVIN Amelogenin, X isoform OS=Bos taurus OX=9913 GN=AMELX PE=1 SV=2	1	hf1_10472_ebo_34_1_261219.ScanId;v=1;d1=37451.37451.3	controllerType=0 controllerNumber=1 scan=37451	76.6934
00435:3	1	S.MP[+15.995]LPPHPGHPGYINF.S		P[+16]	563.948	3	1689.83	1689.82	0	6.1	17	Non	338.38	338.38	4	5.22	2376	>sp|P02817|AMELX_BOVIN Amelogenin, X isoform OS=Bos taurus OX=9913 GN=AMELX PE=1 SV=2	1	hf1_10472_ebo_34_1_261219.ScanId;v=1;d1=2090.2090.3	controllerType=0 controllerNumber=1 scan=2090	11.2892
46692:2	1	S.M[+15.995]PLPPHPGHPGYINF.S		M[+16]	845.422	2	1689.84	1689.82	0	9.2	17	Non	345.07	345.07	16.82	5.02	2376	>sp|P02817|AMELX_BOVIN Amelogenin, X isoform OS=Bos taurus OX=9913 GN=AMELX PE=1 SV=2	1	hf1_10472_ebo_34_1_261219.ScanId;v=1;d1=33762.33762.3	controllerType=0 controllerNumber=1 scan=33762	66.6509
48805:3	1	S.MP[+15.995]LPPHPGHPGYINF.S		P[+16]	563.948	3	1689.83	1689.82	0	5.4	17	Non	346.3	346.3	4	5.39	2376	>sp|P02817|AMELX_BOVIN Amelogenin, X isoform OS=Bos taurus OX=9913 GN=AMELX PE=1 SV=2	1	hf1_10472_ebo_34_1_261219.ScanId;v=1;d1=35599.35599.3	controllerType=0 controllerNumber=1 scan=35599	70.9795
22084:3	1	S.MPLPPHPGHP[+15.995]GYINF.S		P[+16]	563.947	3	1689.83	1689.82	0	2.8	17	Non	347.4	347.4	7.45	4.81	2376	>sp|P02817|AMELX_BOVIN Amelogenin, X isoform OS=Bos taurus OX=9913 GN=AMELX PE=1 SV=2	1	hf1_10472_ebo_34_1_261219.ScanId;v=1;d1=17279.17279.3	controllerType=0 controllerNumber=1 scan=17279	37.4661
00505:3	1	S.MP[+15.995]LPPHPGHPGYINF.S		P[+16]	563.947	3	1689.83	1689.82	0	4	17	Non	347.66	347.66	4	5.15	2376	>sp|P02817|AMELX_BOVIN Amelogenin, X isoform OS=Bos taurus OX=9913 GN=AMELX PE=1 SV=2	1	hf1_10472_ebo_34_1_261219.ScanId;v=1;d1=2232.2232.3	controllerType=0 controllerNumber=1 scan=2232	11.9625
46979:3	1	S.MP[+15.995]LPPHPGHPGYINF.S		P[+16]	563.947	3	1689.83	1689.82	0	4.4	17	Non	348.68	348.68	4	5.2	2376	>sp|P02817|AMELX_BOVIN Amelogenin, X isoform OS=Bos taurus OX=9913 GN=AMELX PE=1 SV=2	1	hf1_10472_ebo_34_1_261219.ScanId;v=1;d1=34004.34004.3	controllerType=0 controllerNumber=1 scan=34004	67.2036
50622:3	1	S.MP[+15.995]LPPHPGHPGYINF.S		P[+16]	563.949	3	1689.83	1689.82	0	6.4	17	Non	350.01	350.01	4	5.44	2376	>sp|P02817|AMELX_BOVIN Amelogenin, X isoform OS=Bos taurus OX=9913 GN=AMELX PE=1 SV=2	1	hf1_10472_ebo_34_1_261219.ScanId;v=1;d1=37521.37521.3	controllerType=0 controllerNumber=1 scan=37521	77.0329
47620:3	1	S.MP[+15.995]LPPHPGHPGYINF.S		P[+16]	563.948	3	1689.83	1689.82	0	4.7	17	Non	352.31	352.31	4	5.39	2376	>sp|P02817|AMELX_BOVIN Amelogenin, X isoform OS=Bos taurus OX=9913 GN=AMELX PE=1 SV=2	1	hf1_10472_ebo_34_1_261219.ScanId;v=1;d1=34569.34569.3	controllerType=0 controllerNumber=1 scan=34569	68.5685
49855:3	1	S.MP[+15.995]LPPHPGHPGYINF.S		P[+16]	563.949	3	1689.83	1689.82	0	6.4	17	Non	354.26	354.26	5.8	5.44	2376	>sp|P02817|AMELX_BOVIN Amelogenin, X isoform OS=Bos taurus OX=9913 GN=AMELX PE=1 SV=2	1	hf1_10472_ebo_34_1_261219.ScanId;v=1;d1=36565.36565.3	controllerType=0 controllerNumber=1 scan=36565	73.3572
49136:3	1	S.MP[+15.995]LPPHPGHPGYINF.S		P[+16]	563.948	3	1689.83	1689.82	0	4.9	17	Non	354.82	354.82	4	5.39	2376	>sp|P02817|AMELX_BOVIN Amelogenin, X isoform OS=Bos taurus OX=9913 GN=AMELX PE=1 SV=2	1	hf1_10472_ebo_34_1_261219.ScanId;v=1;d1=35889.35889.3	controllerType=0 controllerNumber=1 scan=35889	71.6585
20014:3	1	S.MP[+15.995]LPPHPGHPGYINF.S		P[+16]	563.95	3	1689.83	1689.82	0	8.4	17	Non	356.77	356.77	5.8	4.57	2376	>sp|P02817|AMELX_BOVIN Amelogenin, X isoform OS=Bos taurus OX=9913 GN=AMELX PE=1 SV=2	1	hf1_10472_ebo_34_1_261219.ScanId;v=1;d1=15845.15845.3	controllerType=0 controllerNumber=1 scan=15845	35.0233
50240:3	1	S.MP[+15.995]LPPHPGHPGYINF.S		P[+16]	563.949	3	1689.83	1689.82	0	7.6	17	Non	357.3	354.35	4	5.44	2376	>sp|P02817|AMELX_BOVIN Amelogenin, X isoform OS=Bos taurus OX=9913 GN=AMELX PE=1 SV=2	1	hf1_10472_ebo_34_1_261219.ScanId;v=1;d1=36903.36903.3	controllerType=0 controllerNumber=1 scan=36903	74.3147
31240:3	1	S.MP[+15.995]LPPHPGHPGYINF.S		P[+16]	563.948	3	1689.83	1689.82	0	4.7	17	Non	362.65	362.65	4	5.33	2376	>sp|P02817|AMELX_BOVIN Amelogenin, X isoform OS=Bos taurus OX=9913 GN=AMELX PE=1 SV=2	1	hf1_10472_ebo_34_1_261219.ScanId;v=1;d1=23409.23409.3	controllerType=0 controllerNumber=1 scan=23409	47.8741
18607:3	1	S.MP[+15.995]LPPHPGHPGYINF.S		P[+16]	563.949	3	1689.83	1689.82	0	7.6	17	Non	363.19	363.19	4	5.67	2376	>sp|P02817|AMELX_BOVIN Amelogenin, X isoform OS=Bos taurus OX=9913 GN=AMELX PE=1 SV=2	1	hf1_10472_ebo_34_1_261219.ScanId;v=1;d1=14837.14837.3	controllerType=0 controllerNumber=1 scan=14837	33.3046
24013:3	1	S.MP[+15.995]LPPHPGHPGYINF.S		P[+16]	563.946	3	1689.82	1689.82	0	2.4	17	Non	365.33	364.78	5.8	5.32	2376	>sp|P02817|AMELX_BOVIN Amelogenin, X isoform OS=Bos taurus OX=9913 GN=AMELX PE=1 SV=2	1	hf1_10472_ebo_34_1_261219.ScanId;v=1;d1=18582.18582.3	controllerType=0 controllerNumber=1 scan=18582	39.6702
22188:2	1	S.MPLPPHPGHPGY[+15.995]INF.S		Y[+16]	845.418	2	1689.83	1689.82	0	4.5	17	Non	365.93	321.73	0	5.04	2376	>sp|P02817|AMELX_BOVIN Amelogenin, X isoform OS=Bos taurus OX=9913 GN=AMELX PE=1 SV=2	1	hf1_10472_ebo_34_1_261219.ScanId;v=1;d1=17346.17346.2	controllerType=0 controllerNumber=1 scan=17346	37.5822
19449:3	1	S.MP[+15.995]LPPHPGHPGYINF.S		P[+16]	563.95	3	1689.83	1689.82	0	8.5	17	Non	370.27	370.27	4	5.51	2376	>sp|P02817|AMELX_BOVIN Amelogenin, X isoform OS=Bos taurus OX=9913 GN=AMELX PE=1 SV=2	1	hf1_10472_ebo_34_1_261219.ScanId;v=1;d1=15434.15434.3	controllerType=0 controllerNumber=1 scan=15434	34.3331
47725:2	1	S.M[+15.995]PLPPHPGHPGYINF.S		M[+16]	845.417	2	1689.83	1689.82	0	3.6	17	Non	371.17	371.17	31.62	6.81	2376	>sp|P02817|AMELX_BOVIN Amelogenin, X isoform OS=Bos taurus OX=9913 GN=AMELX PE=1 SV=2	1	hf1_10472_ebo_34_1_261219.ScanId;v=1;d1=34666.34666.2	controllerType=0 controllerNumber=1 scan=34666	68.7803
24482:2	1	S.MPLPPHPGHPGYIN[+0.984]F.S		N[+1]	837.911	2	1674.81	1674.81	0	2.6	17	Non	371.51	350.42	350.42	4.61	2376	>sp|P02817|AMELX_BOVIN Amelogenin, X isoform OS=Bos taurus OX=9913 GN=AMELX PE=1 SV=2	1	hf1_10472_ebo_34_1_261219.ScanId;v=1;d1=18886.18886.4	controllerType=0 controllerNumber=1 scan=18886	40.1872
00399:3	1	S.MP[+15.995]LPPHPGHPGYINF.S		P[+16]	563.947	3	1689.83	1689.82	0	4.3	17	Non	371.88	371.88	4	6.15	2376	>sp|P02817|AMELX_BOVIN Amelogenin, X isoform OS=Bos taurus OX=9913 GN=AMELX PE=1 SV=2	1	hf1_10472_ebo_34_1_261219.ScanId;v=1;d1=2018.2018.3	controllerType=0 controllerNumber=1 scan=2018	10.9473
47787:3	1	S.MP[+15.995]LPPHPGHPGYINF.S		P[+16]	563.947	3	1689.83	1689.82	0	4.4	17	Non	372.98	372.98	4	6.15	2376	>sp|P02817|AMELX_BOVIN Amelogenin, X isoform OS=Bos taurus OX=9913 GN=AMELX PE=1 SV=2	1	hf1_10472_ebo_34_1_261219.ScanId;v=1;d1=34718.34718.3	controllerType=0 controllerNumber=1 scan=34718	68.9116
23388:3	1	S.MP[+15.995]LPPHPGHPGYINF.S		P[+16]	563.948	3	1689.83	1689.82	0	5	17	Non	373.51	353.72	5.8	5.33	2376	>sp|P02817|AMELX_BOVIN Amelogenin, X isoform OS=Bos taurus OX=9913 GN=AMELX PE=1 SV=2	1	hf1_10472_ebo_34_1_261219.ScanId;v=1;d1=18160.18160.3	controllerType=0 controllerNumber=1 scan=18160	38.9592
20121:3	1	S.M[+31.990]PLPPHPGHPGYINF.S		M[+32]	569.279	3	1705.82	1705.82	0	4	17	Non	375.05	375.05	8.35	6.38	2376	>sp|P02817|AMELX_BOVIN Amelogenin, X isoform OS=Bos taurus OX=9913 GN=AMELX PE=1 SV=2	1	hf1_10472_ebo_34_1_261219.ScanId;v=1;d1=15922.15922.3	controllerType=0 controllerNumber=1 scan=15922	35.1516
47911:2	1	S.M[+15.995]PLPPHPGHPGYINF.S		M[+16]	845.419	2	1689.83	1689.82	0	6.4	17	Non	379.29	379.29	31.95	6.66	2376	>sp|P02817|AMELX_BOVIN Amelogenin, X isoform OS=Bos taurus OX=9913 GN=AMELX PE=1 SV=2	1	hf1_10472_ebo_34_1_261219.ScanId;v=1;d1=34821.34821.2	controllerType=0 controllerNumber=1 scan=34821	69.1328
48278:3	1	S.MP[+15.995]LPPHPGHPGYINF.S		P[+16]	563.948	3	1689.83	1689.82	0	4.5	17	Non	380.82	380.82	4	6.15	2376	>sp|P02817|AMELX_BOVIN Amelogenin, X isoform OS=Bos taurus OX=9913 GN=AMELX PE=1 SV=2	1	hf1_10472_ebo_34_1_261219.ScanId;v=1;d1=35151.35151.3	controllerType=0 controllerNumber=1 scan=35151	69.9521
19166:3	1	S.MP[+15.995]LPPHPGHPGYINF.S		P[+16]	563.949	3	1689.83	1689.82	0	7.5	17	Non	381.25	381.25	4	6.61	2376	>sp|P02817|AMELX_BOVIN Amelogenin, X isoform OS=Bos taurus OX=9913 GN=AMELX PE=1 SV=2	1	hf1_10472_ebo_34_1_261219.ScanId;v=1;d1=15237.15237.3	controllerType=0 controllerNumber=1 scan=15237	33.9905
23392:3	1	S.MP[+15.995]LPPHPGHPGYINF.S		P[+16]	563.948	3	1689.83	1689.82	0	5	17	Non	382.76	382.76	5.8	6.31	2376	>sp|P02817|AMELX_BOVIN Amelogenin, X isoform OS=Bos taurus OX=9913 GN=AMELX PE=1 SV=2	1	hf1_10472_ebo_34_1_261219.ScanId;v=1;d1=18163.18163.3	controllerType=0 controllerNumber=1 scan=18163	38.9626
46631:3	1	S.MP[+15.995]LPPHPGHPGYINF.S		P[+16]	563.948	3	1689.83	1689.82	0	4.6	17	Non	387.04	387.04	4	6.31	2376	>sp|P02817|AMELX_BOVIN Amelogenin, X isoform OS=Bos taurus OX=9913 GN=AMELX PE=1 SV=2	1	hf1_10472_ebo_34_1_261219.ScanId;v=1;d1=33706.33706.3	controllerType=0 controllerNumber=1 scan=33706	66.519
49155:2	1	S.M[+15.995]PLPPHPGHPGYINF.S		M[+16]	845.417	2	1689.83	1689.82	0	3.8	17	Non	387.76	322.45	35.76	5.47	2376	>sp|P02817|AMELX_BOVIN Amelogenin, X isoform OS=Bos taurus OX=9913 GN=AMELX PE=1 SV=2	1	hf1_10472_ebo_34_1_261219.ScanId;v=1;d1=35907.35907.2	controllerType=0 controllerNumber=1 scan=35907	71.6959
00353:3	1	S.MP[+15.995]LPPHPGHPGYINF.S		P[+16]	563.947	3	1689.83	1689.82	0	3.7	17	Non	389.04	389.04	4	6.18	2376	>sp|P02817|AMELX_BOVIN Amelogenin, X isoform OS=Bos taurus OX=9913 GN=AMELX PE=1 SV=2	1	hf1_10472_ebo_34_1_261219.ScanId;v=1;d1=1941.1941.3	controllerType=0 controllerNumber=1 scan=1941	10.6053
47443:3	1	S.MP[+15.995]LPPHPGHPGYINF.S		P[+16]	563.948	3	1689.83	1689.82	0	4.6	17	Non	389.09	389.09	4	6.36	2376	>sp|P02817|AMELX_BOVIN Amelogenin, X isoform OS=Bos taurus OX=9913 GN=AMELX PE=1 SV=2	1	hf1_10472_ebo_34_1_261219.ScanId;v=1;d1=34423.34423.3	controllerType=0 controllerNumber=1 scan=34423	68.2304
50105:3	1	S.MP[+15.995]LPPHPGHPGYINF.S		P[+16]	563.947	3	1689.83	1689.82	0	3.8	17	Non	390.08	390.08	4	6.42	2376	>sp|P02817|AMELX_BOVIN Amelogenin, X isoform OS=Bos taurus OX=9913 GN=AMELX PE=1 SV=2	1	hf1_10472_ebo_34_1_261219.ScanId;v=1;d1=36787.36787.3	controllerType=0 controllerNumber=1 scan=36787	73.9629
49478:2	1	S.M[+15.995]PLPPHPGHPGYINF.S		M[+16]	845.421	2	1689.83	1689.82	0	8.2	17	Non	390.61	390.61	39.28	7.08	2376	>sp|P02817|AMELX_BOVIN Amelogenin, X isoform OS=Bos taurus OX=9913 GN=AMELX PE=1 SV=2	1	hf1_10472_ebo_34_1_261219.ScanId;v=1;d1=36199.36199.2	controllerType=0 controllerNumber=1 scan=36199	72.4107
48787:2	1	S.M[+15.995]PLPPHPGHPGYINF.S		M[+16]	845.42	2	1689.83	1689.82	0	7.7	17	Non	396.4	396.4	37.08	6.8	2376	>sp|P02817|AMELX_BOVIN Amelogenin, X isoform OS=Bos taurus OX=9913 GN=AMELX PE=1 SV=2	1	hf1_10472_ebo_34_1_261219.ScanId;v=1;d1=35584.35584.2	controllerType=0 controllerNumber=1 scan=35584	70.9443
21167:3	1	S.MPLPPHPGHP[+15.995]GYINF.S		P[+16]	563.947	3	1689.83	1689.82	0	3.8	17	Non	396.75	396.75	9.35	6.18	2376	>sp|P02817|AMELX_BOVIN Amelogenin, X isoform OS=Bos taurus OX=9913 GN=AMELX PE=1 SV=2	1	hf1_10472_ebo_34_1_261219.ScanId;v=1;d1=16654.16654.3	controllerType=0 controllerNumber=1 scan=16654	36.4088
23698:3	1	S.M[+15.995]PLPPHPGHPGYINF.S		M[+16]	563.947	3	1689.83	1689.82	0	3.8	17	Non	397.64	359.66	2.23	5.24	2376	>sp|P02817|AMELX_BOVIN Amelogenin, X isoform OS=Bos taurus OX=9913 GN=AMELX PE=1 SV=2	1	hf1_10472_ebo_34_1_261219.ScanId;v=1;d1=18371.18371.3	controllerType=0 controllerNumber=1 scan=18371	39.3149
24379:2	1	S.MPLPPHPGHPGYIN[+0.984]F.S		N[+1]	837.91	2	1674.81	1674.81	0	1.8	17	Non	401.14	381.12	381.12	6.08	2376	>sp|P02817|AMELX_BOVIN Amelogenin, X isoform OS=Bos taurus OX=9913 GN=AMELX PE=1 SV=2	1	hf1_10472_ebo_34_1_261219.ScanId;v=1;d1=18819.18819.3	controllerType=0 controllerNumber=1 scan=18819	40.0745
23072:3	1	S.MP[+15.995]LPPHPGHPGYINF.S		P[+16]	563.946	3	1689.82	1689.82	0	1.4	17	Non	402.06	401.52	5.8	5.7	2376	>sp|P02817|AMELX_BOVIN Amelogenin, X isoform OS=Bos taurus OX=9913 GN=AMELX PE=1 SV=2	1	hf1_10472_ebo_34_1_261219.ScanId;v=1;d1=17951.17951.3	controllerType=0 controllerNumber=1 scan=17951	38.6044
48625:2	1	S.M[+15.995]PLPPHPGHPGYINF.S		M[+16]	845.417	2	1689.83	1689.82	0	4	17	Non	404.57	404.57	39.93	6.8	2376	>sp|P02817|AMELX_BOVIN Amelogenin, X isoform OS=Bos taurus OX=9913 GN=AMELX PE=1 SV=2	1	hf1_10472_ebo_34_1_261219.ScanId;v=1;d1=35439.35439.2	controllerType=0 controllerNumber=1 scan=35439	70.6001
20403:3	1	S.M[+31.990]PLPPHPGHPGYINF.S		M[+32]	569.28	3	1705.83	1705.82	0	5.5	17	Non	411.47	411.47	6.65	6.36	2376	>sp|P02817|AMELX_BOVIN Amelogenin, X isoform OS=Bos taurus OX=9913 GN=AMELX PE=1 SV=2	1	hf1_10472_ebo_34_1_261219.ScanId;v=1;d1=16118.16118.3	controllerType=0 controllerNumber=1 scan=16118	35.4881
48075:2	1	S.M[+15.995]PLPPHPGHPGYINF.S		M[+16]	845.42	2	1689.83	1689.82	0	6.8	17	Non	414.31	414.31	37.66	6.8	2376	>sp|P02817|AMELX_BOVIN Amelogenin, X isoform OS=Bos taurus OX=9913 GN=AMELX PE=1 SV=2	1	hf1_10472_ebo_34_1_261219.ScanId;v=1;d1=34966.34966.2	controllerType=0 controllerNumber=1 scan=34966	69.4808
20540:2	1	S.M[+15.995]PLPPHPGHPGYINF.S		M[+16]	845.417	2	1689.83	1689.82	0	3.9	17	Non	415.59	405.32	14.8	6.57	2376	>sp|P02817|AMELX_BOVIN Amelogenin, X isoform OS=Bos taurus OX=9913 GN=AMELX PE=1 SV=2	1	hf1_10472_ebo_34_1_261219.ScanId;v=1;d1=16217.16217.2	controllerType=0 controllerNumber=1 scan=16217	35.6607
30774:3	1	S.MP[+15.995]LPPHPGHPGYINF.S		P[+16]	563.948	3	1689.83	1689.82	0	4.9	17	Non	418.6	418.6	4	6.45	2376	>sp|P02817|AMELX_BOVIN Amelogenin, X isoform OS=Bos taurus OX=9913 GN=AMELX PE=1 SV=2	1	hf1_10472_ebo_34_1_261219.ScanId;v=1;d1=23112.23112.3	controllerType=0 controllerNumber=1 scan=23112	47.3658
19834:3	1	S.MP[+31.990]LPPHPGHPGYINF.S		P[+32]	569.279	3	1705.82	1705.82	0	3.5	17	Non	424.8	424.8	1.8	6.22	2376	>sp|P02817|AMELX_BOVIN Amelogenin, X isoform OS=Bos taurus OX=9913 GN=AMELX PE=1 SV=2	1	hf1_10472_ebo_34_1_261219.ScanId;v=1;d1=15711.15711.3	controllerType=0 controllerNumber=1 scan=15711	34.7943
24630:3	1	S.MPLPPHPGHPGYIN[+0.984]F.S		N[+1]	558.945	3	1674.82	1674.81	0	6	17	Non	426.98	420.41	420.41	6.4	2376	>sp|P02817|AMELX_BOVIN Amelogenin, X isoform OS=Bos taurus OX=9913 GN=AMELX PE=1 SV=2	1	hf1_10472_ebo_34_1_261219.ScanId;v=1;d1=18985.18985.3	controllerType=0 controllerNumber=1 scan=18985	40.3527
21463:3	1	S.MPLPPHPGHP[+15.995]GYINF.S		P[+16]	563.947	3	1689.83	1689.82	0	3.8	17	Non	432.82	432.82	5.87	6.27	2376	>sp|P02817|AMELX_BOVIN Amelogenin, X isoform OS=Bos taurus OX=9913 GN=AMELX PE=1 SV=2	1	hf1_10472_ebo_34_1_261219.ScanId;v=1;d1=16858.16858.3	controllerType=0 controllerNumber=1 scan=16858	36.7579
16793:2	1	S.M[+15.995]PLPPHPGHPGYINF.S		M[+16]	845.418	2	1689.83	1689.82	0	5	17	Non	438.77	336.41	22.3	5.89	2376	>sp|P02817|AMELX_BOVIN Amelogenin, X isoform OS=Bos taurus OX=9913 GN=AMELX PE=1 SV=2	1	hf1_10472_ebo_34_1_261219.ScanId;v=1;d1=13553.13553.2	controllerType=0 controllerNumber=1 scan=13553	31.1281
21763:3	1	S.MPLPPHPGH[+15.995]PGYINF.S		H[+16]	563.948	3	1689.83	1689.82	0	4.6	17	Non	444.77	444.77	0	6.45	2376	>sp|P02817|AMELX_BOVIN Amelogenin, X isoform OS=Bos taurus OX=9913 GN=AMELX PE=1 SV=2	1	hf1_10472_ebo_34_1_261219.ScanId;v=1;d1=17068.17068.3	controllerType=0 controllerNumber=1 scan=17068	37.1127
23573:2	1	S.MPLPPHPGHPGYIN[+0.984]F.S		N[+1]	837.913	2	1674.82	1674.81	0	5.4	17	Non	450.14	450.14	450.14	6.83	2376	>sp|P02817|AMELX_BOVIN Amelogenin, X isoform OS=Bos taurus OX=9913 GN=AMELX PE=1 SV=2	1	hf1_10472_ebo_34_1_261219.ScanId;v=1;d1=18285.18285.2	controllerType=0 controllerNumber=1 scan=18285	39.1682
24311:3	1	S.MPLPPHPGHPGYIN[+0.984]F.S		N[+1]	558.943	3	1674.82	1674.81	0	3.7	17	Non	466.58	466.58	466.58	6.48	2376	>sp|P02817|AMELX_BOVIN Amelogenin, X isoform OS=Bos taurus OX=9913 GN=AMELX PE=1 SV=2	1	hf1_10472_ebo_34_1_261219.ScanId;v=1;d1=18773.18773.3	controllerType=0 controllerNumber=1 scan=18773	39.9948
20341:2	1	S.MP[+31.990]LPPHPGHPGYINF.S		P[+32]	853.417	2	1705.83	1705.82	0	6.4	17	Non	479.46	479.46	1.8	6.81	2376	>sp|P02817|AMELX_BOVIN Amelogenin, X isoform OS=Bos taurus OX=9913 GN=AMELX PE=1 SV=2	1	hf1_10472_ebo_34_1_261219.ScanId;v=1;d1=16072.16072.2	controllerType=0 controllerNumber=1 scan=16072	35.4099
22094:2	1	S.MPLPPHPGH[+15.995]PGYINF.S		H[+16]	845.417	2	1689.83	1689.82	0	4.1	17	Non	481.16	412.35	1.18	6.58	2376	>sp|P02817|AMELX_BOVIN Amelogenin, X isoform OS=Bos taurus OX=9913 GN=AMELX PE=1 SV=2	1	hf1_10472_ebo_34_1_261219.ScanId;v=1;d1=17285.17285.2	controllerType=0 controllerNumber=1 scan=17285	37.4741
23367:3	1	S.MPLPPHPGHPGYIN[+0.984]F.S		N[+1]	558.947	3	1674.83	1674.81	0	9.4	17	Non	482.72	482.72	482.72	5.85	2376	>sp|P02817|AMELX_BOVIN Amelogenin, X isoform OS=Bos taurus OX=9913 GN=AMELX PE=1 SV=2	1	hf1_10472_ebo_34_1_261219.ScanId;v=1;d1=18146.18146.3	controllerType=0 controllerNumber=1 scan=18146	38.9372
17948:2	1	S.M[+15.995]PLPPHPGHPGYINF.S		M[+16]	845.421	2	1689.84	1689.82	0	8.7	17	Non	508.62	367.17	55.96	6.09	2376	>sp|P02817|AMELX_BOVIN Amelogenin, X isoform OS=Bos taurus OX=9913 GN=AMELX PE=1 SV=2	1	hf1_10472_ebo_34_1_261219.ScanId;v=1;d1=14378.14378.2	controllerType=0 controllerNumber=1 scan=14378	32.5395
23988:3	1	S.MPLPPHPGHPGYIN[+0.984]F.S		N[+1]	558.945	3	1674.82	1674.81	0	6.9	17	Non	513.16	513.16	513.16	6.85	2376	>sp|P02817|AMELX_BOVIN Amelogenin, X isoform OS=Bos taurus OX=9913 GN=AMELX PE=1 SV=2	1	hf1_10472_ebo_34_1_261219.ScanId;v=1;d1=18564.18564.3	controllerType=0 controllerNumber=1 scan=18564	39.6417
23675:3	1	S.MPLPPHPGHPGYIN[+0.984]F.S		N[+1]	558.946	3	1674.82	1674.81	0	8.6	17	Non	533.17	533.17	533.17	6.73	2376	>sp|P02817|AMELX_BOVIN Amelogenin, X isoform OS=Bos taurus OX=9913 GN=AMELX PE=1 SV=2	1	hf1_10472_ebo_34_1_261219.ScanId;v=1;d1=18355.18355.3	controllerType=0 controllerNumber=1 scan=18355	39.2889
19687:2	1	S.M[+15.995]PLPPHPGHPGYINF.S		M[+16]	845.418	2	1689.83	1689.82	0	5.3	17	Non	535.17	490.19	41.89	7.26	2376	>sp|P02817|AMELX_BOVIN Amelogenin, X isoform OS=Bos taurus OX=9913 GN=AMELX PE=1 SV=2	1	hf1_10472_ebo_34_1_261219.ScanId;v=1;d1=15603.15603.2	controllerType=0 controllerNumber=1 scan=15603	34.6184
19963:2	1	S.M[+15.995]PLPPHPGHPGYINF.S		M[+16]	845.418	2	1689.83	1689.82	0	4.2	17	Non	542.55	489.28	57.3	7.08	2376	>sp|P02817|AMELX_BOVIN Amelogenin, X isoform OS=Bos taurus OX=9913 GN=AMELX PE=1 SV=2	1	hf1_10472_ebo_34_1_261219.ScanId;v=1;d1=15808.15808.2	controllerType=0 controllerNumber=1 scan=15808	34.9619
18237:2	1	S.M[+15.995]PLPPHPGHPGYINF.S		M[+16]	845.419	2	1689.83	1689.82	0	6.1	17	Non	546.11	433.16	51.15	7.26	2376	>sp|P02817|AMELX_BOVIN Amelogenin, X isoform OS=Bos taurus OX=9913 GN=AMELX PE=1 SV=2	1	hf1_10472_ebo_34_1_261219.ScanId;v=1;d1=14585.14585.2	controllerType=0 controllerNumber=1 scan=14585	32.8898
20046:2	1	S.MP[+31.990]LPPHPGHPGYINF.S		P[+32]	853.415	2	1705.82	1705.82	0	4.1	17	Non	550.4	550.4	1.8	6.85	2376	>sp|P02817|AMELX_BOVIN Amelogenin, X isoform OS=Bos taurus OX=9913 GN=AMELX PE=1 SV=2	1	hf1_10472_ebo_34_1_261219.ScanId;v=1;d1=15868.15868.2	controllerType=0 controllerNumber=1 scan=15868	35.0626
20257:2	1	S.M[+15.995]PLPPHPGHPGYINF.S		M[+16]	845.418	2	1689.83	1689.82	0	4.6	17	Non	551.69	503.58	39.44	7.26	2376	>sp|P02817|AMELX_BOVIN Amelogenin, X isoform OS=Bos taurus OX=9913 GN=AMELX PE=1 SV=2	1	hf1_10472_ebo_34_1_261219.ScanId;v=1;d1=16015.16015.2	controllerType=0 controllerNumber=1 scan=16015	35.3138
21120:2	1	S.MPLPPHPGHP[+15.995]GYINF.S		P[+16]	845.418	2	1689.83	1689.82	0	5.4	17	Non	570	465.34	7.23	7.79	2376	>sp|P02817|AMELX_BOVIN Amelogenin, X isoform OS=Bos taurus OX=9913 GN=AMELX PE=1 SV=2	1	hf1_10472_ebo_34_1_261219.ScanId;v=1;d1=16623.16623.2	controllerType=0 controllerNumber=1 scan=16623	36.3572
21765:2	1	S.MPLPPHPGHP[+15.995]GYINF.S		P[+16]	845.418	2	1689.83	1689.82	0	4.7	17	Non	571.17	483.42	7.34	7.84	2376	>sp|P02817|AMELX_BOVIN Amelogenin, X isoform OS=Bos taurus OX=9913 GN=AMELX PE=1 SV=2	1	hf1_10472_ebo_34_1_261219.ScanId;v=1;d1=17070.17070.2	controllerType=0 controllerNumber=1 scan=17070	37.1153
18542:2	1	S.M[+15.995]PLPPHPGHPGYINF.S		M[+16]	845.418	2	1689.83	1689.82	0	4.8	17	Non	579.07	490	45.65	8.08	2376	>sp|P02817|AMELX_BOVIN Amelogenin, X isoform OS=Bos taurus OX=9913 GN=AMELX PE=1 SV=2	1	hf1_10472_ebo_34_1_261219.ScanId;v=1;d1=14793.14793.2	controllerType=0 controllerNumber=1 scan=14793	33.2323
21468:2	1	S.MPLPPHPGHP[+15.995]GYINF.S		P[+16]	845.418	2	1689.83	1689.82	0	4.6	17	Non	594.91	498.48	13.25	7.84	2376	>sp|P02817|AMELX_BOVIN Amelogenin, X isoform OS=Bos taurus OX=9913 GN=AMELX PE=1 SV=2	1	hf1_10472_ebo_34_1_261219.ScanId;v=1;d1=16862.16862.2	controllerType=0 controllerNumber=1 scan=16862	36.7634
19102:2	1	S.M[+15.995]PLPPHPGHPGYINF.S		M[+16]	845.418	2	1689.83	1689.82	0	4.8	17	Non	596	539.69	72.49	8.12	2376	>sp|P02817|AMELX_BOVIN Amelogenin, X isoform OS=Bos taurus OX=9913 GN=AMELX PE=1 SV=2	1	hf1_10472_ebo_34_1_261219.ScanId;v=1;d1=15191.15191.2	controllerType=0 controllerNumber=1 scan=15191	33.9162
19382:2	1	S.M[+15.995]PLPPHPGHPGYINF.S		M[+16]	845.418	2	1689.83	1689.82	0	5.1	17	Non	623.82	564.26	58.63	9.08	2376	>sp|P02817|AMELX_BOVIN Amelogenin, X isoform OS=Bos taurus OX=9913 GN=AMELX PE=1 SV=2	1	hf1_10472_ebo_34_1_261219.ScanId;v=1;d1=15391.15391.2	controllerType=0 controllerNumber=1 scan=15391	34.2644
18812:2	1	S.M[+15.995]PLPPHPGHPGYINF.S		M[+16]	845.418	2	1689.83	1689.82	0	4.5	17	Non	636.78	557.13	58.54	8.94	2376	>sp|P02817|AMELX_BOVIN Amelogenin, X isoform OS=Bos taurus OX=9913 GN=AMELX PE=1 SV=2	1	hf1_10472_ebo_34_1_261219.ScanId;v=1;d1=14989.14989.2	controllerType=0 controllerNumber=1 scan=14989	33.5744
24154:2	1	S.MPLPPHPGHPGYIN[+0.984]F.S		N[+1]	837.913	2	1674.82	1674.81	0	5.2	17	Non	649.33	597.59	597.59	9.08	2376	>sp|P02817|AMELX_BOVIN Amelogenin, X isoform OS=Bos taurus OX=9913 GN=AMELX PE=1 SV=2	1	hf1_10472_ebo_34_1_261219.ScanId;v=1;d1=18674.18674.2	controllerType=0 controllerNumber=1 scan=18674	39.8297
23842:2	1	S.MPLPPHPGHPGYIN[+0.984]F.S		N[+1]	837.913	2	1674.82	1674.81	0	5.8	17	Non	679	643.01	643.01	10.12	2376	>sp|P02817|AMELX_BOVIN Amelogenin, X isoform OS=Bos taurus OX=9913 GN=AMELX PE=1 SV=2	1	hf1_10472_ebo_34_1_261219.ScanId;v=1;d1=18466.18466.2	controllerType=0 controllerNumber=1 scan=18466	39.4757
23218:2	1	S.MPLPPHPGHPGYIN[+0.984]F.S		N[+1]	837.913	2	1674.82	1674.81	0	5.3	17	Non	690.71	670.28	670.28	10.12	2376	>sp|P02817|AMELX_BOVIN Amelogenin, X isoform OS=Bos taurus OX=9913 GN=AMELX PE=1 SV=2	1	hf1_10472_ebo_34_1_261219.ScanId;v=1;d1=18047.18047.2	controllerType=0 controllerNumber=1 scan=18047	38.7696
23525:2	1	S.MPLPPHPGHPGYIN[+0.984]F.S		N[+1]	837.913	2	1674.82	1674.81	0	5.7	17	Non	697.51	654.52	654.52	10.12	2376	>sp|P02817|AMELX_BOVIN Amelogenin, X isoform OS=Bos taurus OX=9913 GN=AMELX PE=1 SV=2	1	hf1_10472_ebo_34_1_261219.ScanId;v=1;d1=18256.18256.2	controllerType=0 controllerNumber=1 scan=18256	39.1212
17175:3	1	S.MP[+15.995]LPPH[+15.995]PGHPGYINF.S		H[+16], P[+16]	569.279	3	1705.82	1705.82	0	4.2	17	Non	56.27	56.27	4	0.43	2376	>sp|P02817|AMELX_BOVIN Amelogenin, X isoform OS=Bos taurus OX=9913 GN=AMELX PE=1 SV=2	1	hf1_10472_ebo_34_1_261219.ScanId;v=1;d1=13826.13826.2	controllerType=0 controllerNumber=1 scan=13826	31.5837
21587:2	1	S.MP[+15.995]LP[+31.990]PHPGHPGYINF.S		P[+16][+32]	861.414	2	1721.82	1721.81	0	5.8	17	Non	79.46	79.46	0	0.36	2376	>sp|P02817|AMELX_BOVIN Amelogenin, X isoform OS=Bos taurus OX=9913 GN=AMELX PE=1 SV=2	1	hf1_10472_ebo_34_1_261219.ScanId;v=1;d1=16948.16948.5	controllerType=0 controllerNumber=1 scan=16948	36.9092
00031:3	1	S.MP[+15.995]LPPHPGHPGY[+15.995]INF.S		P[+16], Y[+16]	569.28	3	1705.83	1705.82	0	5.8	17	Non	95.86	95.86	4	0.54	2376	>sp|P02817|AMELX_BOVIN Amelogenin, X isoform OS=Bos taurus OX=9913 GN=AMELX PE=1 SV=2	1	hf1_10472_ebo_34_1_261219.ScanId;v=1;d1=120.120.3	controllerType=0 controllerNumber=1 scan=120	0.5673
19062:3	1	S.MP[+15.995]LP[+31.990]PHPGHPGYINF.S		P[+16][+32]	574.611	3	1721.82	1721.81	0	3.7	17	Non	122.36	122.36	2.75	0.48	2376	>sp|P02817|AMELX_BOVIN Amelogenin, X isoform OS=Bos taurus OX=9913 GN=AMELX PE=1 SV=2	1	hf1_10472_ebo_34_1_261219.ScanId;v=1;d1=15159.15159.3	controllerType=0 controllerNumber=1 scan=15159	33.8585
17713:3	1	S.MP[+15.995]LP[+31.990]PHPGHPGYINF.S		P[+16][+32]	574.61	3	1721.81	1721.81	0	2.5	17	Non	149.34	149.34	5.8	1.23	2376	>sp|P02817|AMELX_BOVIN Amelogenin, X isoform OS=Bos taurus OX=9913 GN=AMELX PE=1 SV=2	1	hf1_10472_ebo_34_1_261219.ScanId;v=1;d1=14208.14208.3	controllerType=0 controllerNumber=1 scan=14208	32.2386
19835:2	1	S.MP[+15.995]LPPHPGHPGYIN[+0.984]F.S		N[+1], P[+16]	845.911	2	1690.81	1690.8	0	5.7	17	Non	240.16	240.16	4	4.64	2376	>sp|P02817|AMELX_BOVIN Amelogenin, X isoform OS=Bos taurus OX=9913 GN=AMELX PE=1 SV=2	1	hf1_10472_ebo_34_1_261219.ScanId;v=1;d1=15712.15712.2	controllerType=0 controllerNumber=1 scan=15712	34.7958
22589:2	1	S.M[+15.995]PLP[+15.995]PHPGHPGYINF.S		M[+16], P[+16]	853.417	2	1705.83	1705.82	0	6.1	17	Non	242.83	242.83	0.88	4.49	2376	>sp|P02817|AMELX_BOVIN Amelogenin, X isoform OS=Bos taurus OX=9913 GN=AMELX PE=1 SV=2	1	hf1_10472_ebo_34_1_261219.ScanId;v=1;d1=17627.17627.2	controllerType=0 controllerNumber=1 scan=17627	38.0607
17180:3	1	S.MP[+15.995]LPPHPGHP[+15.995]GYINF.S		P[+16]*2	569.279	3	1705.82	1705.82	0	3.7	17	Non	245.36	245.36	4	4.08	2376	>sp|P02817|AMELX_BOVIN Amelogenin, X isoform OS=Bos taurus OX=9913 GN=AMELX PE=1 SV=2	1	hf1_10472_ebo_34_1_261219.ScanId;v=1;d1=13830.13830.3	controllerType=0 controllerNumber=1 scan=13830	31.5925
18513:3	1	S.MP[+15.995]LP[+31.990]PHPGHPGYINF.S		P[+16][+32]	574.61	3	1721.81	1721.81	0	2.5	17	Non	249.87	249.87	5.8	3.51	2376	>sp|P02817|AMELX_BOVIN Amelogenin, X isoform OS=Bos taurus OX=9913 GN=AMELX PE=1 SV=2	1	hf1_10472_ebo_34_1_261219.ScanId;v=1;d1=14772.14772.3	controllerType=0 controllerNumber=1 scan=14772	33.1938
18901:3	1	S.MP[+15.995]LPPH[+15.995]PGHPGYINF.S		H[+16], P[+16]	569.278	3	1705.82	1705.82	0	2.8	17	Non	278.42	278.42	4	4	2376	>sp|P02817|AMELX_BOVIN Amelogenin, X isoform OS=Bos taurus OX=9913 GN=AMELX PE=1 SV=2	1	hf1_10472_ebo_34_1_261219.ScanId;v=1;d1=15045.15045.3	controllerType=0 controllerNumber=1 scan=15045	33.6642
18611:3	1	S.MP[+15.995]LPPHP[+15.995]GHPGYINF.S		P[+16]*2	569.277	3	1705.82	1705.82	0	1	17	Non	307.28	307.28	4	4.48	2376	>sp|P02817|AMELX_BOVIN Amelogenin, X isoform OS=Bos taurus OX=9913 GN=AMELX PE=1 SV=2	1	hf1_10472_ebo_34_1_261219.ScanId;v=1;d1=14840.14840.3	controllerType=0 controllerNumber=1 scan=14840	33.3112
18319:3	1	S.MP[+15.995]LPPHPGH[+15.995]PGYINF.S		H[+16], P[+16]	569.278	3	1705.82	1705.82	0	2.4	17	Non	309.57	309.57	0	4.4	2376	>sp|P02817|AMELX_BOVIN Amelogenin, X isoform OS=Bos taurus OX=9913 GN=AMELX PE=1 SV=2	1	hf1_10472_ebo_34_1_261219.ScanId;v=1;d1=14640.14640.3	controllerType=0 controllerNumber=1 scan=14640	32.9755
22206:2	1	S.MP[+15.995]LP[+15.995]PHPGHPGYINF.S		P[+16]*2	853.418	2	1705.83	1705.82	0	7.6	17	Non	312.09	312.09	5.8	5.1	2376	>sp|P02817|AMELX_BOVIN Amelogenin, X isoform OS=Bos taurus OX=9913 GN=AMELX PE=1 SV=2	1	hf1_10472_ebo_34_1_261219.ScanId;v=1;d1=17358.17358.2	controllerType=0 controllerNumber=1 scan=17358	37.6025
17468:3	1	S.MP[+15.995]LPPHPGHP[+15.995]GYINF.S		P[+16]*2	569.277	3	1705.82	1705.82	0	1	17	Non	321.58	321.58	4	4.06	2376	>sp|P02817|AMELX_BOVIN Amelogenin, X isoform OS=Bos taurus OX=9913 GN=AMELX PE=1 SV=2	1	hf1_10472_ebo_34_1_261219.ScanId;v=1;d1=14034.14034.3	controllerType=0 controllerNumber=1 scan=14034	31.9394
17746:3	1	S.MP[+15.995]LPPHPGHP[+15.995]GYINF.S		P[+16]*2	569.278	3	1705.82	1705.82	0	2.5	17	Non	341.58	341.58	4	4.61	2376	>sp|P02817|AMELX_BOVIN Amelogenin, X isoform OS=Bos taurus OX=9913 GN=AMELX PE=1 SV=2	1	hf1_10472_ebo_34_1_261219.ScanId;v=1;d1=14233.14233.3	controllerType=0 controllerNumber=1 scan=14233	32.2832
18012:3	1	S.MP[+15.995]LPPHPGHP[+15.995]GYINF.S		P[+16]*2	569.278	3	1705.82	1705.82	0	2.8	17	Non	345.53	345.53	4	4.73	2376	>sp|P02817|AMELX_BOVIN Amelogenin, X isoform OS=Bos taurus OX=9913 GN=AMELX PE=1 SV=2	1	hf1_10472_ebo_34_1_261219.ScanId;v=1;d1=14428.14428.3	controllerType=0 controllerNumber=1 scan=14428	32.6232
23473:2	1	S.M[+15.995]PLPPHP[+15.995]GHPGYINF.S		M[+16], P[+16]	853.417	2	1705.83	1705.82	0	6.4	17	Non	359.8	359.8	12.13	5.77	2376	>sp|P02817|AMELX_BOVIN Amelogenin, X isoform OS=Bos taurus OX=9913 GN=AMELX PE=1 SV=2	1	hf1_10472_ebo_34_1_261219.ScanId;v=1;d1=18217.18217.2	controllerType=0 controllerNumber=1 scan=18217	39.0546
22085:3	1	S.MPLPPHPGHP[+15.995]GYIN[+0.984]F.S		N[+1], P[+16]	564.275	3	1690.81	1690.8	0	3.9	17	Non	386.39	386.39	7.45	6.13	2376	>sp|P02817|AMELX_BOVIN Amelogenin, X isoform OS=Bos taurus OX=9913 GN=AMELX PE=1 SV=2	1	hf1_10472_ebo_34_1_261219.ScanId;v=1;d1=17279.17279.3	controllerType=0 controllerNumber=1 scan=17279	37.4661
20015:3	1	S.MP[+15.995]LPPHPGHPGYIN[+0.984]F.S		N[+1], P[+16]	564.279	3	1690.82	1690.8	0	10	17	Non	402.99	402.99	5.8	5.55	2376	>sp|P02817|AMELX_BOVIN Amelogenin, X isoform OS=Bos taurus OX=9913 GN=AMELX PE=1 SV=2	1	hf1_10472_ebo_34_1_261219.ScanId;v=1;d1=15845.15845.3	controllerType=0 controllerNumber=1 scan=15845	35.0233
20574:3	1	S.MP[+15.995]LPPHPGHPGYIN[+0.984]F.S		N[+1], P[+16]	564.275	3	1690.81	1690.8	0	3.4	17	Non	412.36	412.36	5.8	6.18	2376	>sp|P02817|AMELX_BOVIN Amelogenin, X isoform OS=Bos taurus OX=9913 GN=AMELX PE=1 SV=2	1	hf1_10472_ebo_34_1_261219.ScanId;v=1;d1=16243.16243.3	controllerType=0 controllerNumber=1 scan=16243	35.706
20866:3	1	S.MP[+15.995]LPPHPGHPGYIN[+0.984]F.S		N[+1], P[+16]	564.276	3	1690.81	1690.8	0	5.7	17	Non	425.21	425.21	5.8	6.45	2376	>sp|P02817|AMELX_BOVIN Amelogenin, X isoform OS=Bos taurus OX=9913 GN=AMELX PE=1 SV=2	1	hf1_10472_ebo_34_1_261219.ScanId;v=1;d1=16447.16447.3	controllerType=0 controllerNumber=1 scan=16447	36.0591
20308:3	1	S.MP[+15.995]LPPHPGHPGYIN[+0.984]F.S		N[+1], P[+16]	564.277	3	1690.82	1690.8	0	6.3	17	Non	429.66	429.66	5.8	6.69	2376	>sp|P02817|AMELX_BOVIN Amelogenin, X isoform OS=Bos taurus OX=9913 GN=AMELX PE=1 SV=2	1	hf1_10472_ebo_34_1_261219.ScanId;v=1;d1=16048.16048.3	controllerType=0 controllerNumber=1 scan=16048	35.3684
17088:2	1	S.M[+15.995]PLPPHPGHPGY[+15.995]INF.S		M[+16], Y[+16]	853.413	2	1705.82	1705.82	0	2.5	17	Non	454.36	454.36	0	6.17	2376	>sp|P02817|AMELX_BOVIN Amelogenin, X isoform OS=Bos taurus OX=9913 GN=AMELX PE=1 SV=2	1	hf1_10472_ebo_34_1_261219.ScanId;v=1;d1=13765.13765.2	controllerType=0 controllerNumber=1 scan=13765	31.4866
19688:2	1	S.M[+15.995]PLPPHPGHPGYIN[+0.984]F.S		M[+16], N[+1]	845.913	2	1690.82	1690.8	0	7.9	17	Non	488.17	460.24	52.23	6.86	2376	>sp|P02817|AMELX_BOVIN Amelogenin, X isoform OS=Bos taurus OX=9913 GN=AMELX PE=1 SV=2	1	hf1_10472_ebo_34_1_261219.ScanId;v=1;d1=15603.15603.2	controllerType=0 controllerNumber=1 scan=15603	34.6184
17380:2	1	S.M[+15.995]PLPPHPGHPGY[+15.995]INF.S		M[+16], Y[+16]	853.415	2	1705.82	1705.82	0	4.4	17	Non	521.22	521.22	0	6.67	2376	>sp|P02817|AMELX_BOVIN Amelogenin, X isoform OS=Bos taurus OX=9913 GN=AMELX PE=1 SV=2	1	hf1_10472_ebo_34_1_261219.ScanId;v=1;d1=13975.13975.2	controllerType=0 controllerNumber=1 scan=13975	31.8426
19119:2	1	S.M[+15.995]PLPP[+15.995]HPGHPGYINF.S		M[+16], P[+16]	853.415	2	1705.82	1705.82	0	4.3	17	Non	521.45	521.45	5.62	6.72	2376	>sp|P02817|AMELX_BOVIN Amelogenin, X isoform OS=Bos taurus OX=9913 GN=AMELX PE=1 SV=2	1	hf1_10472_ebo_34_1_261219.ScanId;v=1;d1=15203.15203.2	controllerType=0 controllerNumber=1 scan=15203	33.9322
18242:2	1	S.M[+15.995]PLPPHPGHPGY[+15.995]INF.S		M[+16], Y[+16]	853.416	2	1705.82	1705.82	0	5.2	17	Non	525.02	525.02	0	6.9	2376	>sp|P02817|AMELX_BOVIN Amelogenin, X isoform OS=Bos taurus OX=9913 GN=AMELX PE=1 SV=2	1	hf1_10472_ebo_34_1_261219.ScanId;v=1;d1=14588.14588.2	controllerType=0 controllerNumber=1 scan=14588	32.8921
19964:2	1	S.M[+15.995]PLPPHPGHPGYIN[+0.984]F.S		M[+16], N[+1]	845.91	2	1690.81	1690.8	0	5.1	17	Non	533.71	505.62	61.99	7.26	2376	>sp|P02817|AMELX_BOVIN Amelogenin, X isoform OS=Bos taurus OX=9913 GN=AMELX PE=1 SV=2	1	hf1_10472_ebo_34_1_261219.ScanId;v=1;d1=15808.15808.2	controllerType=0 controllerNumber=1 scan=15808	34.9619
20830:2	1	S.M[+15.995]PLPPHPGHPGYIN[+0.984]F.S		M[+16], N[+1]	845.91	2	1690.81	1690.8	0	5.3	17	Non	549.99	489.4	53.32	7.03	2376	>sp|P02817|AMELX_BOVIN Amelogenin, X isoform OS=Bos taurus OX=9913 GN=AMELX PE=1 SV=2	1	hf1_10472_ebo_34_1_261219.ScanId;v=1;d1=16420.16420.2	controllerType=0 controllerNumber=1 scan=16420	36.0123
18543:2	1	S.M[+15.995]PLPPHPGHP[+15.995]GYINF.S		M[+16], P[+16]	853.417	2	1705.83	1705.82	0	6.3	17	Non	564.75	564.75	0.63	8.08	2376	>sp|P02817|AMELX_BOVIN Amelogenin, X isoform OS=Bos taurus OX=9913 GN=AMELX PE=1 SV=2	1	hf1_10472_ebo_34_1_261219.ScanId;v=1;d1=14794.14794.2	controllerType=0 controllerNumber=1 scan=14794	33.2332
20258:2	1	S.M[+15.995]PLPPHPGHPGYIN[+0.984]F.S		M[+16], N[+1]	845.91	2	1690.81	1690.8	0	4.6	17	Non	565.68	530.03	64.06	8.08	2376	>sp|P02817|AMELX_BOVIN Amelogenin, X isoform OS=Bos taurus OX=9913 GN=AMELX PE=1 SV=2	1	hf1_10472_ebo_34_1_261219.ScanId;v=1;d1=16015.16015.2	controllerType=0 controllerNumber=1 scan=16015	35.3138
18826:2	1	S.M[+15.995]PLPPH[+15.995]PGHPGYINF.S		H[+16], M[+16]	853.415	2	1705.82	1705.82	0	3.7	17	Non	567.28	567.28	10.14	7.66	2376	>sp|P02817|AMELX_BOVIN Amelogenin, X isoform OS=Bos taurus OX=9913 GN=AMELX PE=1 SV=2	1	hf1_10472_ebo_34_1_261219.ScanId;v=1;d1=14997.14997.2	controllerType=0 controllerNumber=1 scan=14997	33.5839
19765:2	1	S.M[+15.995]P[+15.995]LPPHPGHPGYINF.S		M[+16], P[+16]	853.415	2	1705.82	1705.82	0	4.6	17	Non	569.1	569.1	1.33	7.84	2376	>sp|P02817|AMELX_BOVIN Amelogenin, X isoform OS=Bos taurus OX=9913 GN=AMELX PE=1 SV=2	1	hf1_10472_ebo_34_1_261219.ScanId;v=1;d1=15662.15662.2	controllerType=0 controllerNumber=1 scan=15662	34.7141
20541:2	1	S.M[+15.995]PLPPHPGHPGYIN[+0.984]F.S		M[+16], N[+1]	845.909	2	1690.81	1690.8	0	4.3	17	Non	573.18	512.23	46.27	7.9	2376	>sp|P02817|AMELX_BOVIN Amelogenin, X isoform OS=Bos taurus OX=9913 GN=AMELX PE=1 SV=2	1	hf1_10472_ebo_34_1_261219.ScanId;v=1;d1=16217.16217.2	controllerType=0 controllerNumber=1 scan=16217	35.6607
17950:2	1	S.M[+15.995]PLPPHPGHP[+15.995]GYINF.S		M[+16], P[+16]	853.414	2	1705.82	1705.82	0	3.6	17	Non	581.72	581.72	6.85	7.9	2376	>sp|P02817|AMELX_BOVIN Amelogenin, X isoform OS=Bos taurus OX=9913 GN=AMELX PE=1 SV=2	1	hf1_10472_ebo_34_1_261219.ScanId;v=1;d1=14379.14379.2	controllerType=0 controllerNumber=1 scan=14379	32.5403
17672:2	1	S.M[+15.995]PLPPHPGHPGY[+15.995]INF.S		M[+16], Y[+16]	853.414	2	1705.82	1705.82	0	3	17	Non	611.39	611.39	0	8.9	2376	>sp|P02817|AMELX_BOVIN Amelogenin, X isoform OS=Bos taurus OX=9913 GN=AMELX PE=1 SV=2	1	hf1_10472_ebo_34_1_261219.ScanId;v=1;d1=14178.14178.2	controllerType=0 controllerNumber=1 scan=14178	32.1907
21563:2	1	S.M[+15.995]PLP[+31.990]PH[+15.995]PGHPGYINF.S		H[+16], M[+16], P[+32]	869.403	2	1737.8	1737.81	0	-3.4	17	Non	108.81	108.81	0	0.42	2376	>sp|P02817|AMELX_BOVIN Amelogenin, X isoform OS=Bos taurus OX=9913 GN=AMELX PE=1 SV=2	1	hf1_10472_ebo_34_1_261219.ScanId;v=1;d1=16930.16930.3	controllerType=0 controllerNumber=1 scan=16930	36.8767
20382:3	1	S.MPLPPHPGHPGYINFS.Y			587.627	3	1760.87	1760.86	0	4.5	17	Non	306.52	83.53	83.53	2.73	2376	>sp|P02817|AMELX_BOVIN Amelogenin, X isoform OS=Bos taurus OX=9913 GN=AMELX PE=1 SV=2	1	hf1_10472_ebo_34_1_261219.ScanId;v=1;d1=16103.16103.3	controllerType=0 controllerNumber=1 scan=16103	35.4619
20412:2	1	S.MPLPPHPGHPGYINFS.Y			880.937	2	1760.87	1760.86	0	5.6	17	Non	318.75	226.98	226.98	4.61	2376	>sp|P02817|AMELX_BOVIN Amelogenin, X isoform OS=Bos taurus OX=9913 GN=AMELX PE=1 SV=2	1	hf1_10472_ebo_34_1_261219.ScanId;v=1;d1=16123.16123.2	controllerType=0 controllerNumber=1 scan=16123	35.4937
20616:2	1	S.MPLPPHPGHPGYINFS.Y			880.934	2	1760.86	1760.86	0	2.3	17	Non	323.44	258.04	258.04	4.3	2376	>sp|P02817|AMELX_BOVIN Amelogenin, X isoform OS=Bos taurus OX=9913 GN=AMELX PE=1 SV=2	1	hf1_10472_ebo_34_1_261219.ScanId;v=1;d1=16273.16273.4	controllerType=0 controllerNumber=1 scan=16273	35.7574
20659:3	1	S.MPLPPHPGHPGYINFS.Y			587.627	3	1760.87	1760.86	0	4.7	17	Non	402.55	164.24	164.24	4.4	2376	>sp|P02817|AMELX_BOVIN Amelogenin, X isoform OS=Bos taurus OX=9913 GN=AMELX PE=1 SV=2	1	hf1_10472_ebo_34_1_261219.ScanId;v=1;d1=16304.16304.3	controllerType=0 controllerNumber=1 scan=16304	35.8125
20750:2	1	S.MPLPPHPGHPGYINFS.Y			880.937	2	1760.87	1760.86	0	5.2	17	Non	412.99	297.75	297.75	5.6	2376	>sp|P02817|AMELX_BOVIN Amelogenin, X isoform OS=Bos taurus OX=9913 GN=AMELX PE=1 SV=2	1	hf1_10472_ebo_34_1_261219.ScanId;v=1;d1=16367.16367.2	controllerType=0 controllerNumber=1 scan=16367	35.9202
20650:2	1	S.MPLPPHPGHPGYINFS.Y			880.937	2	1760.87	1760.86	0	5.5	17	Non	423.7	323.69	323.69	5.69	2376	>sp|P02817|AMELX_BOVIN Amelogenin, X isoform OS=Bos taurus OX=9913 GN=AMELX PE=1 SV=2	1	hf1_10472_ebo_34_1_261219.ScanId;v=1;d1=16297.16297.4	controllerType=0 controllerNumber=1 scan=16297	35.8007
49336:3	1	S.MPLPPHPGHPGYINFS[+79.966].Y		S[+80]	614.281	3	1840.83	1840.82	0	2.8	17	Non	12.79	12.79	12.79	1.07	2376	>sp|P02817|AMELX_BOVIN Amelogenin, X isoform OS=Bos taurus OX=9913 GN=AMELX PE=1 SV=2	1	hf1_10472_ebo_34_1_261219.ScanId;v=1;d1=36065.36065.3	controllerType=0 controllerNumber=1 scan=36065	72.0883
48438:3	1	S.MPLPPHPGHPGYINFS[+79.966].Y		S[+80]	614.282	3	1840.83	1840.82	0	4.7	17	Non	77.09	77.09	77.09	0.99	2376	>sp|P02817|AMELX_BOVIN Amelogenin, X isoform OS=Bos taurus OX=9913 GN=AMELX PE=1 SV=2	1	hf1_10472_ebo_34_1_261219.ScanId;v=1;d1=35286.35286.3	controllerType=0 controllerNumber=1 scan=35286	70.2504
49841:3	1	S.MPLPPHPGHPGYINFS[+79.966].Y		S[+80]	614.283	3	1840.83	1840.82	0	5.1	17	Non	87.36	87.36	87.36	1.99	2376	>sp|P02817|AMELX_BOVIN Amelogenin, X isoform OS=Bos taurus OX=9913 GN=AMELX PE=1 SV=2	1	hf1_10472_ebo_34_1_261219.ScanId;v=1;d1=36553.36553.3	controllerType=0 controllerNumber=1 scan=36553	73.3334
48922:2	1	S.MPLPPHPGHPGYINFS[+79.966].Y		S[+80]	920.92	2	1840.83	1840.82	0	5.3	17	Non	90.54	90.54	90.54	1.23	2376	>sp|P02817|AMELX_BOVIN Amelogenin, X isoform OS=Bos taurus OX=9913 GN=AMELX PE=1 SV=2	1	hf1_10472_ebo_34_1_261219.ScanId;v=1;d1=35706.35706.2	controllerType=0 controllerNumber=1 scan=35706	71.2467
48944:3	1	S.MPLPPHPGHPGYINFS[+79.966].Y		S[+80]	614.282	3	1840.83	1840.82	0	4.3	17	Non	127.1	127.1	127.1	1.45	2376	>sp|P02817|AMELX_BOVIN Amelogenin, X isoform OS=Bos taurus OX=9913 GN=AMELX PE=1 SV=2	1	hf1_10472_ebo_34_1_261219.ScanId;v=1;d1=35725.35725.6	controllerType=0 controllerNumber=1 scan=35725	71.2891
47398:2	1	S.MPLPPHPGHPGYINFS[+79.966].Y		S[+80]	920.921	2	1840.83	1840.82	0	5.8	17	Non	154.94	154.94	130.84	2.81	2376	>sp|P02817|AMELX_BOVIN Amelogenin, X isoform OS=Bos taurus OX=9913 GN=AMELX PE=1 SV=2	1	hf1_10472_ebo_34_1_261219.ScanId;v=1;d1=34383.34383.2	controllerType=0 controllerNumber=1 scan=34383	68.1386
20871:3	1	S.MP[+15.995]LPPHPGHPGYINFS.Y		P[+16]	592.958	3	1776.86	1776.85	0	4.7	17	Non	169.56	97.71	5.8	0.54	2376	>sp|P02817|AMELX_BOVIN Amelogenin, X isoform OS=Bos taurus OX=9913 GN=AMELX PE=1 SV=2	1	hf1_10472_ebo_34_1_261219.ScanId;v=1;d1=16450.16450.3	controllerType=0 controllerNumber=1 scan=16450	36.0636
48790:3	1	S.MPLPPHPGHPGYINFS[+79.966].Y		S[+80]	614.282	3	1840.83	1840.82	0	3.6	17	Non	170.34	170.34	161.48	2.55	2376	>sp|P02817|AMELX_BOVIN Amelogenin, X isoform OS=Bos taurus OX=9913 GN=AMELX PE=1 SV=2	1	hf1_10472_ebo_34_1_261219.ScanId;v=1;d1=35586.35586.6	controllerType=0 controllerNumber=1 scan=35586	70.9473
20409:3	1	S.MP[+15.995]LPPHPGHPGYINFS.Y		P[+16]	592.96	3	1776.87	1776.85	0	7.6	17	Non	181.06	36.61	5.8	0.51	2376	>sp|P02817|AMELX_BOVIN Amelogenin, X isoform OS=Bos taurus OX=9913 GN=AMELX PE=1 SV=2	1	hf1_10472_ebo_34_1_261219.ScanId;v=1;d1=16121.16121.3	controllerType=0 controllerNumber=1 scan=16121	35.4912
18865:3	1	S.MP[+15.995]LPPHPGHPGYINFS.Y		P[+16]	592.96	3	1776.86	1776.85	0	6.7	17	Non	195.26	32.76	5.8	0.66	2376	>sp|P02817|AMELX_BOVIN Amelogenin, X isoform OS=Bos taurus OX=9913 GN=AMELX PE=1 SV=2	1	hf1_10472_ebo_34_1_261219.ScanId;v=1;d1=15023.15023.3	controllerType=0 controllerNumber=1 scan=15023	33.6283
18320:2	1	S.M[+15.995]PLPPHPGHPGYINFS.Y		M[+16]	888.935	2	1776.86	1776.85	0	5.8	17	Non	202.45	61.01	10.84	1.13	2376	>sp|P02817|AMELX_BOVIN Amelogenin, X isoform OS=Bos taurus OX=9913 GN=AMELX PE=1 SV=2	1	hf1_10472_ebo_34_1_261219.ScanId;v=1;d1=14641.14641.3	controllerType=0 controllerNumber=1 scan=14641	32.977
18579:3	1	S.MP[+15.995]LPPHPGHPGYINFS.Y		P[+16]	592.96	3	1776.87	1776.85	0	6.9	17	Non	266.71	138.34	4	2.86	2376	>sp|P02817|AMELX_BOVIN Amelogenin, X isoform OS=Bos taurus OX=9913 GN=AMELX PE=1 SV=2	1	hf1_10472_ebo_34_1_261219.ScanId;v=1;d1=14817.14817.3	controllerType=0 controllerNumber=1 scan=14817	33.2696
22698:2	1	S.MPLPPHPGHPGYINFS[+79.966].Y		S[+80]	920.922	2	1840.84	1840.82	0	7.2	17	Non	281.98	281.98	152.24	5.39	2376	>sp|P02817|AMELX_BOVIN Amelogenin, X isoform OS=Bos taurus OX=9913 GN=AMELX PE=1 SV=2	1	hf1_10472_ebo_34_1_261219.ScanId;v=1;d1=17703.17703.3	controllerType=0 controllerNumber=1 scan=17703	38.1935
17411:3	1	S.M[+15.995]PLPPHPGHPGYINFS.Y		M[+16]	592.957	3	1776.86	1776.85	0	1.9	17	Non	283.56	203.9	5.24	3.99	2376	>sp|P02817|AMELX_BOVIN Amelogenin, X isoform OS=Bos taurus OX=9913 GN=AMELX PE=1 SV=2	1	hf1_10472_ebo_34_1_261219.ScanId;v=1;d1=13995.13995.3	controllerType=0 controllerNumber=1 scan=13995	31.8752
18274:3	1	S.MP[+15.995]LPPHPGHPGYINFS.Y		P[+16]	592.958	3	1776.86	1776.85	0	4.3	17	Non	291.8	291.8	5.8	4.56	2376	>sp|P02817|AMELX_BOVIN Amelogenin, X isoform OS=Bos taurus OX=9913 GN=AMELX PE=1 SV=2	1	hf1_10472_ebo_34_1_261219.ScanId;v=1;d1=14610.14610.3	controllerType=0 controllerNumber=1 scan=14610	32.9257
17694:3	1	S.MP[+15.995]LPPHPGHPGYINFS.Y		P[+16]	592.958	3	1776.86	1776.85	0	3.7	17	Non	294.14	217.18	4	4.41	2376	>sp|P02817|AMELX_BOVIN Amelogenin, X isoform OS=Bos taurus OX=9913 GN=AMELX PE=1 SV=2	1	hf1_10472_ebo_34_1_261219.ScanId;v=1;d1=14194.14194.3	controllerType=0 controllerNumber=1 scan=14194	32.2186
18490:2	1	S.M[+15.995]PLPPHPGHPGYINFS.Y		M[+16]	888.937	2	1776.87	1776.85	0	8	17	Non	303.53	177.07	18.41	4.31	2376	>sp|P02817|AMELX_BOVIN Amelogenin, X isoform OS=Bos taurus OX=9913 GN=AMELX PE=1 SV=2	1	hf1_10472_ebo_34_1_261219.ScanId;v=1;d1=14756.14756.2	controllerType=0 controllerNumber=1 scan=14756	33.1689
22566:2	1	S.MPLPPHPGHPGYINFS[+79.966].Y		S[+80]	920.914	2	1840.82	1840.82	0	-1.3	17	Non	346.56	262.86	233.25	4.56	2376	>sp|P02817|AMELX_BOVIN Amelogenin, X isoform OS=Bos taurus OX=9913 GN=AMELX PE=1 SV=2	1	hf1_10472_ebo_34_1_261219.ScanId;v=1;d1=17611.17611.2	controllerType=0 controllerNumber=1 scan=17611	38.0319
24329:3	1	S.MPLPPHPGHPGYINFS[+79.966].Y		S[+80]	614.284	3	1840.84	1840.82	0	6.9	17	Non	357.03	357.03	204.21	5.44	2376	>sp|P02817|AMELX_BOVIN Amelogenin, X isoform OS=Bos taurus OX=9913 GN=AMELX PE=1 SV=2	1	hf1_10472_ebo_34_1_261219.ScanId;v=1;d1=18784.18784.3	controllerType=0 controllerNumber=1 scan=18784	40.0131
17067:2	1	S.M[+15.995]PLPPHPGHPGYINFS.Y		M[+16]	888.933	2	1776.86	1776.85	0	2.9	17	Non	383	311.82	26.68	5.42	2376	>sp|P02817|AMELX_BOVIN Amelogenin, X isoform OS=Bos taurus OX=9913 GN=AMELX PE=1 SV=2	1	hf1_10472_ebo_34_1_261219.ScanId;v=1;d1=13751.13751.2	controllerType=0 controllerNumber=1 scan=13751	31.461
17970:3	1	S.MP[+15.995]LPPHPGHPGYINFS.Y		P[+16]	592.958	3	1776.86	1776.85	0	3.9	17	Non	385.68	305.59	4	5.09	2376	>sp|P02817|AMELX_BOVIN Amelogenin, X isoform OS=Bos taurus OX=9913 GN=AMELX PE=1 SV=2	1	hf1_10472_ebo_34_1_261219.ScanId;v=1;d1=14396.14396.3	controllerType=0 controllerNumber=1 scan=14396	32.568
24004:3	1	S.MPLPPHPGHPGYINFS[+79.966].Y		S[+80]	614.284	3	1840.84	1840.82	0	7.8	17	Non	424.49	424.49	251.95	6.5	2376	>sp|P02817|AMELX_BOVIN Amelogenin, X isoform OS=Bos taurus OX=9913 GN=AMELX PE=1 SV=2	1	hf1_10472_ebo_34_1_261219.ScanId;v=1;d1=18577.18577.3	controllerType=0 controllerNumber=1 scan=18577	39.6627
22753:3	1	S.MPLPPHPGHPGYINFS[+79.966].Y		S[+80]	614.283	3	1840.84	1840.82	0	6.3	17	Non	455.76	394.3	308.98	6.66	2376	>sp|P02817|AMELX_BOVIN Amelogenin, X isoform OS=Bos taurus OX=9913 GN=AMELX PE=1 SV=2	1	hf1_10472_ebo_34_1_261219.ScanId;v=1;d1=17741.17741.3	controllerType=0 controllerNumber=1 scan=17741	38.2537
18017:2	1	S.M[+15.995]PLPPHPGHPGYINFS.Y		M[+16]	888.934	2	1776.86	1776.85	0	4.5	17	Non	462.15	161.46	46.95	4.61	2376	>sp|P02817|AMELX_BOVIN Amelogenin, X isoform OS=Bos taurus OX=9913 GN=AMELX PE=1 SV=2	1	hf1_10472_ebo_34_1_261219.ScanId;v=1;d1=14431.14431.2	controllerType=0 controllerNumber=1 scan=14431	32.6271
23383:3	1	S.MPLPPHPGHPGYINFS[+79.966].Y		S[+80]	614.284	3	1840.84	1840.82	0	7.5	17	Non	467.46	373.65	296.09	6.71	2376	>sp|P02817|AMELX_BOVIN Amelogenin, X isoform OS=Bos taurus OX=9913 GN=AMELX PE=1 SV=2	1	hf1_10472_ebo_34_1_261219.ScanId;v=1;d1=18157.18157.3	controllerType=0 controllerNumber=1 scan=18157	38.9555
23063:3	1	S.MPLPPHPGHPGYINFS[+79.966].Y		S[+80]	614.284	3	1840.84	1840.82	0	6.5	17	Non	476.11	400.5	297.68	6.76	2376	>sp|P02817|AMELX_BOVIN Amelogenin, X isoform OS=Bos taurus OX=9913 GN=AMELX PE=1 SV=2	1	hf1_10472_ebo_34_1_261219.ScanId;v=1;d1=17946.17946.3	controllerType=0 controllerNumber=1 scan=17946	38.5982
17350:2	1	S.M[+15.995]PLPPHPGHPGYINFS.Y		M[+16]	888.934	2	1776.86	1776.85	0	4.8	17	Non	480.69	364.01	25.71	6.81	2376	>sp|P02817|AMELX_BOVIN Amelogenin, X isoform OS=Bos taurus OX=9913 GN=AMELX PE=1 SV=2	1	hf1_10472_ebo_34_1_261219.ScanId;v=1;d1=13953.13953.2	controllerType=0 controllerNumber=1 scan=13953	31.8069
23690:3	1	S.MPLPPHPGHPGYINFS[+79.966].Y		S[+80]	614.284	3	1840.84	1840.82	0	7.4	17	Non	493.7	493.7	307.25	6.85	2376	>sp|P02817|AMELX_BOVIN Amelogenin, X isoform OS=Bos taurus OX=9913 GN=AMELX PE=1 SV=2	1	hf1_10472_ebo_34_1_261219.ScanId;v=1;d1=18366.18366.3	controllerType=0 controllerNumber=1 scan=18366	39.3081
17640:2	1	S.M[+15.995]PLPPHPGHPGYINFS.Y		M[+16]	888.934	2	1776.86	1776.85	0	5.1	17	Non	522.25	332.51	40.74	6.2	2376	>sp|P02817|AMELX_BOVIN Amelogenin, X isoform OS=Bos taurus OX=9913 GN=AMELX PE=1 SV=2	1	hf1_10472_ebo_34_1_261219.ScanId;v=1;d1=14157.14157.2	controllerType=0 controllerNumber=1 scan=14157	32.1543
24102:2	1	S.MPLPPHPGHPGYINFS[+79.966].Y		S[+80]	920.922	2	1840.84	1840.82	0	6.5	17	Non	642.58	642.58	316.76	9.79	2376	>sp|P02817|AMELX_BOVIN Amelogenin, X isoform OS=Bos taurus OX=9913 GN=AMELX PE=1 SV=2	1	hf1_10472_ebo_34_1_261219.ScanId;v=1;d1=18641.18641.2	controllerType=0 controllerNumber=1 scan=18641	39.7743
23481:2	1	S.MPLPPHPGHPGYINFS[+79.966].Y		S[+80]	920.921	2	1840.84	1840.82	0	6.1	17	Non	679.13	679.13	310.45	10.74	2376	>sp|P02817|AMELX_BOVIN Amelogenin, X isoform OS=Bos taurus OX=9913 GN=AMELX PE=1 SV=2	1	hf1_10472_ebo_34_1_261219.ScanId;v=1;d1=18223.18223.2	controllerType=0 controllerNumber=1 scan=18223	39.0664
23797:2	1	S.MPLPPHPGHPGYINFS[+79.966].Y		S[+80]	920.921	2	1840.84	1840.82	0	6.2	17	Non	725.69	725.69	388.63	11.74	2376	>sp|P02817|AMELX_BOVIN Amelogenin, X isoform OS=Bos taurus OX=9913 GN=AMELX PE=1 SV=2	1	hf1_10472_ebo_34_1_261219.ScanId;v=1;d1=18433.18433.2	controllerType=0 controllerNumber=1 scan=18433	39.421
22864:2	1	S.MPLPPHPGHPGYINFS[+79.966].Y		S[+80]	920.921	2	1840.84	1840.82	0	6	17	Non	730.08	730.08	366.59	11.74	2376	>sp|P02817|AMELX_BOVIN Amelogenin, X isoform OS=Bos taurus OX=9913 GN=AMELX PE=1 SV=2	1	hf1_10472_ebo_34_1_261219.ScanId;v=1;d1=17813.17813.2	controllerType=0 controllerNumber=1 scan=17813	38.3777
23166:2	1	S.MPLPPHPGHPGYINFS[+79.966].Y		S[+80]	920.921	2	1840.83	1840.82	0	5.4	17	Non	782.23	584.79	380.06	12.74	2376	>sp|P02817|AMELX_BOVIN Amelogenin, X isoform OS=Bos taurus OX=9913 GN=AMELX PE=1 SV=2	1	hf1_10472_ebo_34_1_261219.ScanId;v=1;d1=18015.18015.2	controllerType=0 controllerNumber=1 scan=18015	38.7164
48345:3	1	S.MP[+15.995]LPPHPGHPGYINFS[+79.966].Y		P[+16], S[+80]	619.614	3	1856.83	1856.82	0	4.1	17	Non	6.67	6.67	4	0.25	2376	>sp|P02817|AMELX_BOVIN Amelogenin, X isoform OS=Bos taurus OX=9913 GN=AMELX PE=1 SV=2	1	hf1_10472_ebo_34_1_261219.ScanId;v=1;d1=35210.35210.3	controllerType=0 controllerNumber=1 scan=35210	70.0946
47414:3	1	S.MP[+15.995]LPPHPGHPGYINFS[+79.966].Y		P[+16], S[+80]	619.614	3	1856.83	1856.82	0	5.2	17	Non	7.41	7.41	4	0.62	2376	>sp|P02817|AMELX_BOVIN Amelogenin, X isoform OS=Bos taurus OX=9913 GN=AMELX PE=1 SV=2	1	hf1_10472_ebo_34_1_261219.ScanId;v=1;d1=34399.34399.3	controllerType=0 controllerNumber=1 scan=34399	68.1766
48180:3	1	S.MP[+15.995]LPPHPGHPGYINFS[+79.966].Y		P[+16], S[+80]	619.615	3	1856.83	1856.82	0	6.8	17	Non	24.11	24.11	4	0.66	2376	>sp|P02817|AMELX_BOVIN Amelogenin, X isoform OS=Bos taurus OX=9913 GN=AMELX PE=1 SV=2	1	hf1_10472_ebo_34_1_261219.ScanId;v=1;d1=35068.35068.3	controllerType=0 controllerNumber=1 scan=35068	69.7545
47598:3	1	S.MP[+15.995]LPPHPGHPGYINFS[+79.966].Y		P[+16], S[+80]	619.609	3	1856.81	1856.82	0	-4.1	17	Non	27.11	27.11	4	0.37	2376	>sp|P02817|AMELX_BOVIN Amelogenin, X isoform OS=Bos taurus OX=9913 GN=AMELX PE=1 SV=2	1	hf1_10472_ebo_34_1_261219.ScanId;v=1;d1=34552.34552.3	controllerType=0 controllerNumber=1 scan=34552	68.5219
46960:3	1	S.MP[+15.995]LPPHPGHPGYINFS[+79.966].Y		P[+16], S[+80]	619.612	3	1856.82	1856.82	0	1.1	17	Non	27.41	27.41	4	0.44	2376	>sp|P02817|AMELX_BOVIN Amelogenin, X isoform OS=Bos taurus OX=9913 GN=AMELX PE=1 SV=2	1	hf1_10472_ebo_34_1_261219.ScanId;v=1;d1=33985.33985.3	controllerType=0 controllerNumber=1 scan=33985	67.1529
49636:3	1	S.MP[+15.995]LPPHPGHPGYINFS[+79.966].Y		P[+16], S[+80]	619.608	3	1856.81	1856.82	0	-4.5	17	Non	27.81	27.81	4	0.37	2376	>sp|P02817|AMELX_BOVIN Amelogenin, X isoform OS=Bos taurus OX=9913 GN=AMELX PE=1 SV=2	1	hf1_10472_ebo_34_1_261219.ScanId;v=1;d1=36357.36357.3	controllerType=0 controllerNumber=1 scan=36357	72.8205
49359:3	1	S.MP[+15.995]LPPHPGHPGYINFS[+79.966].Y		P[+16], S[+80]	619.614	3	1856.83	1856.82	0	3.9	17	Non	39.86	39.86	4	0.71	2376	>sp|P02817|AMELX_BOVIN Amelogenin, X isoform OS=Bos taurus OX=9913 GN=AMELX PE=1 SV=2	1	hf1_10472_ebo_34_1_261219.ScanId;v=1;d1=36086.36086.3	controllerType=0 controllerNumber=1 scan=36086	72.1421
49500:3	1	S.MP[+15.995]LPPHPGHPGYINFS[+79.966].Y		P[+16], S[+80]	619.609	3	1856.81	1856.82	0	-4.1	17	Non	50.7	50.7	4	0.53	2376	>sp|P02817|AMELX_BOVIN Amelogenin, X isoform OS=Bos taurus OX=9913 GN=AMELX PE=1 SV=2	1	hf1_10472_ebo_34_1_261219.ScanId;v=1;d1=36224.36224.3	controllerType=0 controllerNumber=1 scan=36224	72.4827
46778:3	1	S.MP[+15.995]LPPHPGHPGYINFS[+79.966].Y		P[+16], S[+80]	619.615	3	1856.83	1856.82	0	6	17	Non	53.89	53.89	4	1.48	2376	>sp|P02817|AMELX_BOVIN Amelogenin, X isoform OS=Bos taurus OX=9913 GN=AMELX PE=1 SV=2	1	hf1_10472_ebo_34_1_261219.ScanId;v=1;d1=33834.33834.3	controllerType=0 controllerNumber=1 scan=33834	66.8125
47949:3	1	S.MP[+15.995]LPPHPGHPGYINFS[+79.966].Y		P[+16], S[+80]	619.614	3	1856.83	1856.82	0	4.8	17	Non	62.48	62.48	4	0.83	2376	>sp|P02817|AMELX_BOVIN Amelogenin, X isoform OS=Bos taurus OX=9913 GN=AMELX PE=1 SV=2	1	hf1_10472_ebo_34_1_261219.ScanId;v=1;d1=34856.34856.3	controllerType=0 controllerNumber=1 scan=34856	69.2126
48859:3	1	S.MP[+15.995]LPPHPGHPGYINFS[+79.966].Y		P[+16], S[+80]	619.615	3	1856.83	1856.82	0	5.9	17	Non	66.21	66.21	4	0.83	2376	>sp|P02817|AMELX_BOVIN Amelogenin, X isoform OS=Bos taurus OX=9913 GN=AMELX PE=1 SV=2	1	hf1_10472_ebo_34_1_261219.ScanId;v=1;d1=35653.35653.3	controllerType=0 controllerNumber=1 scan=35653	71.1215
49032:3	1	S.MP[+15.995]LPPHPGHPGYINFS[+79.966].Y		P[+16], S[+80]	619.615	3	1856.83	1856.82	0	6	17	Non	68.39	68.39	4	1.48	2376	>sp|P02817|AMELX_BOVIN Amelogenin, X isoform OS=Bos taurus OX=9913 GN=AMELX PE=1 SV=2	1	hf1_10472_ebo_34_1_261219.ScanId;v=1;d1=35802.35802.3	controllerType=0 controllerNumber=1 scan=35802	71.4652
25472:3	1	S.MPLPPHPGHPGYIN[+0.984]FS[+79.966].Y		N[+1], S[+80]	614.611	3	1841.82	1841.81	0	4.9	17	Non	74.52	74.52	74.52	0.54	2376	>sp|P02817|AMELX_BOVIN Amelogenin, X isoform OS=Bos taurus OX=9913 GN=AMELX PE=1 SV=2	1	hf1_10472_ebo_34_1_261219.ScanId;v=1;d1=19551.19551.3	controllerType=0 controllerNumber=1 scan=19551	41.3003
48709:3	1	S.MP[+15.995]LPPHPGHPGYINFS[+79.966].Y		P[+16], S[+80]	619.614	3	1856.83	1856.82	0	4.1	17	Non	78.28	78.28	4	1.44	2376	>sp|P02817|AMELX_BOVIN Amelogenin, X isoform OS=Bos taurus OX=9913 GN=AMELX PE=1 SV=2	1	hf1_10472_ebo_34_1_261219.ScanId;v=1;d1=35515.35515.3	controllerType=0 controllerNumber=1 scan=35515	70.7819
46601:3	1	S.MP[+15.995]LPPHPGHPGYINFS[+79.966].Y		P[+16], S[+80]	619.613	3	1856.83	1856.82	0	3.5	17	Non	101.31	101.31	4	1.44	2376	>sp|P02817|AMELX_BOVIN Amelogenin, X isoform OS=Bos taurus OX=9913 GN=AMELX PE=1 SV=2	1	hf1_10472_ebo_34_1_261219.ScanId;v=1;d1=33681.33681.3	controllerType=0 controllerNumber=1 scan=33681	66.4669
50133:3	1	S.MP[+15.995]LPPHPGHPGYINFS[+79.966].Y		P[+16], S[+80]	619.615	3	1856.83	1856.82	0	6	17	Non	115.9	115.9	4	2.06	2376	>sp|P02817|AMELX_BOVIN Amelogenin, X isoform OS=Bos taurus OX=9913 GN=AMELX PE=1 SV=2	1	hf1_10472_ebo_34_1_261219.ScanId;v=1;d1=36804.36804.3	controllerType=0 controllerNumber=1 scan=36804	73.9916
49197:3	1	S.MP[+15.995]LPPHPGHPGYINFS[+79.966].Y		P[+16], S[+80]	619.612	3	1856.82	1856.82	0	1.8	17	Non	120.25	120.25	4	1.11	2376	>sp|P02817|AMELX_BOVIN Amelogenin, X isoform OS=Bos taurus OX=9913 GN=AMELX PE=1 SV=2	1	hf1_10472_ebo_34_1_261219.ScanId;v=1;d1=35949.35949.3	controllerType=0 controllerNumber=1 scan=35949	71.8034
48127:3	1	S.MP[+15.995]LPPHPGHPGYINFS[+79.966].Y		P[+16], S[+80]	619.612	3	1856.82	1856.82	0	1.7	17	Non	134.08	134.08	4	1.59	2376	>sp|P02817|AMELX_BOVIN Amelogenin, X isoform OS=Bos taurus OX=9913 GN=AMELX PE=1 SV=2	1	hf1_10472_ebo_34_1_261219.ScanId;v=1;d1=35016.35016.6	controllerType=0 controllerNumber=1 scan=35016	69.6102
18832:3	1	S.MP[+15.995]LPPHPGHPGYINFS[+79.966].Y		P[+16], S[+80]	619.615	3	1856.83	1856.82	0	5.3	17	Non	144	144	4	1	2376	>sp|P02817|AMELX_BOVIN Amelogenin, X isoform OS=Bos taurus OX=9913 GN=AMELX PE=1 SV=2	1	hf1_10472_ebo_34_1_261219.ScanId;v=1;d1=15001.15001.2	controllerType=0 controllerNumber=1 scan=15001	33.5918
48548:3	1	S.MP[+15.995]LPPHPGHPGYINFS[+79.966].Y		P[+16], S[+80]	619.612	3	1856.82	1856.82	0	2.2	17	Non	145.48	145.48	5.8	1.11	2376	>sp|P02817|AMELX_BOVIN Amelogenin, X isoform OS=Bos taurus OX=9913 GN=AMELX PE=1 SV=2	1	hf1_10472_ebo_34_1_261219.ScanId;v=1;d1=35373.35373.3	controllerType=0 controllerNumber=1 scan=35373	70.4433
24718:3	1	S.MP[+15.995]LPPHPGHPGYINFS[+79.966].Y		P[+16], S[+80]	619.608	3	1856.81	1856.82	0	-5.2	17	Non	152.77	152.77	9.43	0.73	2376	>sp|P02817|AMELX_BOVIN Amelogenin, X isoform OS=Bos taurus OX=9913 GN=AMELX PE=1 SV=2	1	hf1_10472_ebo_34_1_261219.ScanId;v=1;d1=19043.19043.5	controllerType=0 controllerNumber=1 scan=19043	40.4487
23455:3	1	S.MPLPPHPGHPGY[+15.995]INFS[+79.966].Y		S[+80], Y[+16]	619.607	3	1856.81	1856.82	0	-6.5	17	Non	179.74	179.74	0	1.38	2376	>sp|P02817|AMELX_BOVIN Amelogenin, X isoform OS=Bos taurus OX=9913 GN=AMELX PE=1 SV=2	1	hf1_10472_ebo_34_1_261219.ScanId;v=1;d1=18205.18205.3	controllerType=0 controllerNumber=1 scan=18205	39.0348
25584:2	1	S.MPLPPHPGHPGYIN[+0.984]FS[+79.966].Y		N[+1], S[+80]	921.414	2	1841.82	1841.81	0	6.8	17	Non	186.04	186.04	86.09	3.15	2376	>sp|P02817|AMELX_BOVIN Amelogenin, X isoform OS=Bos taurus OX=9913 GN=AMELX PE=1 SV=2	1	hf1_10472_ebo_34_1_261219.ScanId;v=1;d1=19627.19627.2	controllerType=0 controllerNumber=1 scan=19627	41.4279
00051:3	1	S.MP[+15.995]LPPHPGHPGYINFS[+79.966].Y		P[+16], S[+80]	619.612	3	1856.82	1856.82	0	1.9	17	Non	191.46	191.46	4	2.53	2376	>sp|P02817|AMELX_BOVIN Amelogenin, X isoform OS=Bos taurus OX=9913 GN=AMELX PE=1 SV=2	1	hf1_10472_ebo_34_1_261219.ScanId;v=1;d1=132.132.3	controllerType=0 controllerNumber=1 scan=132	0.5883
20685:3	1	S.M[+31.990]PLPPHPGHPGYINFS[+79.966].Y		M[+32], S[+80]	624.945	3	1872.82	1872.81	0	3	17	Non	203.59	203.59	1.41	2.36	2376	>sp|P02817|AMELX_BOVIN Amelogenin, X isoform OS=Bos taurus OX=9913 GN=AMELX PE=1 SV=2	1	hf1_10472_ebo_34_1_261219.ScanId;v=1;d1=16322.16322.3	controllerType=0 controllerNumber=1 scan=16322	35.8436
50268:3	1	S.MP[+15.995]LPPHPGHPGYINFS[+79.966].Y		P[+16], S[+80]	619.616	3	1856.83	1856.82	0	7.7	17	Non	203.82	203.82	4	2.95	2376	>sp|P02817|AMELX_BOVIN Amelogenin, X isoform OS=Bos taurus OX=9913 GN=AMELX PE=1 SV=2	1	hf1_10472_ebo_34_1_261219.ScanId;v=1;d1=36921.36921.3	controllerType=0 controllerNumber=1 scan=36921	74.3451
24171:3	1	S.MPLP[+15.995]PHPGHPGYINFS[+79.966].Y		P[+16], S[+80]	619.608	3	1856.81	1856.82	0	-5.2	17	Non	212.69	212.69	18.11	1.08	2376	>sp|P02817|AMELX_BOVIN Amelogenin, X isoform OS=Bos taurus OX=9913 GN=AMELX PE=1 SV=2	1	hf1_10472_ebo_34_1_261219.ScanId;v=1;d1=18687.18687.3	controllerType=0 controllerNumber=1 scan=18687	39.8511
22160:3	1	S.MP[+15.995]LPPHPGHPGYINFS[+79.966].Y		P[+16], S[+80]	619.607	3	1856.81	1856.82	0	-6.1	17	Non	215.86	215.86	15.81	2.31	2376	>sp|P02817|AMELX_BOVIN Amelogenin, X isoform OS=Bos taurus OX=9913 GN=AMELX PE=1 SV=2	1	hf1_10472_ebo_34_1_261219.ScanId;v=1;d1=17329.17329.3	controllerType=0 controllerNumber=1 scan=17329	37.5549
21904:3	1	S.MP[+31.990]LPPHPGHPGYINFS[+79.966].Y		P[+32], S[+80]	624.939	3	1872.8	1872.81	0	-6.5	17	Non	223.56	223.56	1.8	2.35	2376	>sp|P02817|AMELX_BOVIN Amelogenin, X isoform OS=Bos taurus OX=9913 GN=AMELX PE=1 SV=2	1	hf1_10472_ebo_34_1_261219.ScanId;v=1;d1=17157.17157.3	controllerType=0 controllerNumber=1 scan=17157	37.2655
22111:2	1	S.M[+31.990]PLPPHPGHPGYINFS[+79.966].Y		M[+32], S[+80]	936.902	2	1872.8	1872.81	0	-9.6	17	Non	230.63	230.63	4.97	2.37	2376	>sp|P02817|AMELX_BOVIN Amelogenin, X isoform OS=Bos taurus OX=9913 GN=AMELX PE=1 SV=2	1	hf1_10472_ebo_34_1_261219.ScanId;v=1;d1=17296.17296.2	controllerType=0 controllerNumber=1 scan=17296	37.4933
21537:3	1	S.M[+15.995]PLPPHPGHPGYINFS[+79.966].Y		M[+16], S[+80]	619.608	3	1856.81	1856.82	0	-5.3	17	Non	246.24	246.24	2.71	3.37	2376	>sp|P02817|AMELX_BOVIN Amelogenin, X isoform OS=Bos taurus OX=9913 GN=AMELX PE=1 SV=2	1	hf1_10472_ebo_34_1_261219.ScanId;v=1;d1=16913.16913.3	controllerType=0 controllerNumber=1 scan=16913	36.8501
23079:3	1	S.MPLPP[+15.995]HPGHPGYINFS[+79.966].Y		P[+16], S[+80]	619.609	3	1856.81	1856.82	0	-3.2	17	Non	252.34	252.34	2.24	3.52	2376	>sp|P02817|AMELX_BOVIN Amelogenin, X isoform OS=Bos taurus OX=9913 GN=AMELX PE=1 SV=2	1	hf1_10472_ebo_34_1_261219.ScanId;v=1;d1=17956.17956.3	controllerType=0 controllerNumber=1 scan=17956	38.6145
23478:2	1	S.MPLPPHPGHPGY[+15.995]INFS[+79.966].Y		S[+80], Y[+16]	928.911	2	1856.81	1856.82	0	-2.4	17	Non	256.91	256.91	0	3.77	2376	>sp|P02817|AMELX_BOVIN Amelogenin, X isoform OS=Bos taurus OX=9913 GN=AMELX PE=1 SV=2	1	hf1_10472_ebo_34_1_261219.ScanId;v=1;d1=18220.18220.2	controllerType=0 controllerNumber=1 scan=18220	39.0591
22465:3	1	S.MPLP[+15.995]PHPGHPGYINFS[+79.966].Y		P[+16], S[+80]	619.61	3	1856.82	1856.82	0	-1.7	17	Non	257.77	257.77	6.17	3.55	2376	>sp|P02817|AMELX_BOVIN Amelogenin, X isoform OS=Bos taurus OX=9913 GN=AMELX PE=1 SV=2	1	hf1_10472_ebo_34_1_261219.ScanId;v=1;d1=17540.17540.3	controllerType=0 controllerNumber=1 scan=17540	37.9097
21848:3	1	S.MP[+15.995]LPPHPGHPGYINFS[+79.966].Y		P[+16], S[+80]	619.609	3	1856.81	1856.82	0	-3.7	17	Non	267.56	267.56	5.8	3.65	2376	>sp|P02817|AMELX_BOVIN Amelogenin, X isoform OS=Bos taurus OX=9913 GN=AMELX PE=1 SV=2	1	hf1_10472_ebo_34_1_261219.ScanId;v=1;d1=17120.17120.3	controllerType=0 controllerNumber=1 scan=17120	37.2016
21288:3	1	S.MP[+31.990]LPPHPGHPGYINFS[+79.966].Y		P[+32], S[+80]	624.942	3	1872.81	1872.81	0	-2	17	Non	277.35	277.35	1.8	3.6	2376	>sp|P02817|AMELX_BOVIN Amelogenin, X isoform OS=Bos taurus OX=9913 GN=AMELX PE=1 SV=2	1	hf1_10472_ebo_34_1_261219.ScanId;v=1;d1=16739.16739.3	controllerType=0 controllerNumber=1 scan=16739	36.5536
18305:2	1	S.M[+15.995]PLPPHPGHPGYIN[+0.984]FS.Y		M[+16], N[+1]	889.428	2	1777.85	1777.84	0	6.6	17	Non	286.39	286.39	11.83	5.04	2376	>sp|P02817|AMELX_BOVIN Amelogenin, X isoform OS=Bos taurus OX=9913 GN=AMELX PE=1 SV=2	1	hf1_10472_ebo_34_1_261219.ScanId;v=1;d1=14632.14632.2	controllerType=0 controllerNumber=1 scan=14632	32.9624
22318:2	1	S.MP[+15.995]LPPHPGHPGYINFS[+79.966].Y		P[+16], S[+80]	928.91	2	1856.81	1856.82	0	-3.5	17	Non	290.5	290.5	0.5	4.23	2376	>sp|P02817|AMELX_BOVIN Amelogenin, X isoform OS=Bos taurus OX=9913 GN=AMELX PE=1 SV=2	1	hf1_10472_ebo_34_1_261219.ScanId;v=1;d1=17439.17439.2	controllerType=0 controllerNumber=1 scan=17439	37.738
21745:2	1	S.M[+31.990]PLPPHPGHPGYINFS[+79.966].Y		M[+32], S[+80]	936.903	2	1872.8	1872.81	0	-7.6	17	Non	301.34	301.34	4.36	4.26	2376	>sp|P02817|AMELX_BOVIN Amelogenin, X isoform OS=Bos taurus OX=9913 GN=AMELX PE=1 SV=2	1	hf1_10472_ebo_34_1_261219.ScanId;v=1;d1=17054.17054.2	controllerType=0 controllerNumber=1 scan=17054	37.0884
25070:2	1	S.MPLPPHPGHPGYIN[+0.984]FS[+79.966].Y		N[+1], S[+80]	921.413	2	1841.82	1841.81	0	5.4	17	Non	301.35	301.35	188.77	5.53	2376	>sp|P02817|AMELX_BOVIN Amelogenin, X isoform OS=Bos taurus OX=9913 GN=AMELX PE=1 SV=2	1	hf1_10472_ebo_34_1_261219.ScanId;v=1;d1=19275.19275.2	controllerType=0 controllerNumber=1 scan=19275	40.8379
21247:3	1	S.M[+15.995]PLPPHPGHPGYINFS[+79.966].Y		M[+16], S[+80]	619.609	3	1856.81	1856.82	0	-4.3	17	Non	303.87	303.87	13.71	4.33	2376	>sp|P02817|AMELX_BOVIN Amelogenin, X isoform OS=Bos taurus OX=9913 GN=AMELX PE=1 SV=2	1	hf1_10472_ebo_34_1_261219.ScanId;v=1;d1=16710.16710.3	controllerType=0 controllerNumber=1 scan=16710	36.5045
20657:3	1	S.M[+15.995]PLPPHPGHPGYINFS[+79.966].Y		M[+16], S[+80]	619.61	3	1856.82	1856.82	0	-1.7	17	Non	307.65	307.65	7.32	4.28	2376	>sp|P02817|AMELX_BOVIN Amelogenin, X isoform OS=Bos taurus OX=9913 GN=AMELX PE=1 SV=2	1	hf1_10472_ebo_34_1_261219.ScanId;v=1;d1=16302.16302.3	controllerType=0 controllerNumber=1 scan=16302	35.811
20375:3	1	S.MP[+15.995]LPPHPGHPGYINFS[+79.966].Y		P[+16], S[+80]	619.611	3	1856.82	1856.82	0	0.6	17	Non	309.46	309.46	4	4.34	2376	>sp|P02817|AMELX_BOVIN Amelogenin, X isoform OS=Bos taurus OX=9913 GN=AMELX PE=1 SV=2	1	hf1_10472_ebo_34_1_261219.ScanId;v=1;d1=16099.16099.3	controllerType=0 controllerNumber=1 scan=16099	35.4568
20950:3	1	S.M[+15.995]PLPPHPGHPGYINFS[+79.966].Y		M[+16], S[+80]	619.609	3	1856.81	1856.82	0	-3	17	Non	313.95	313.95	12.72	4.25	2376	>sp|P02817|AMELX_BOVIN Amelogenin, X isoform OS=Bos taurus OX=9913 GN=AMELX PE=1 SV=2	1	hf1_10472_ebo_34_1_261219.ScanId;v=1;d1=16502.16502.3	controllerType=0 controllerNumber=1 scan=16502	36.1527
19814:3	1	S.M[+15.995]PLPPHPGHPGYINFS[+79.966].Y		M[+16], S[+80]	619.614	3	1856.83	1856.82	0	4.4	17	Non	314.02	314.02	3.32	4.88	2376	>sp|P02817|AMELX_BOVIN Amelogenin, X isoform OS=Bos taurus OX=9913 GN=AMELX PE=1 SV=2	1	hf1_10472_ebo_34_1_261219.ScanId;v=1;d1=15695.15695.3	controllerType=0 controllerNumber=1 scan=15695	34.7717
18976:3	1	S.M[+15.995]PLPPHPGHPGYINFS[+79.966].Y		M[+16], S[+80]	619.614	3	1856.83	1856.82	0	4.8	17	Non	327.91	327.91	5.07	5.22	2376	>sp|P02817|AMELX_BOVIN Amelogenin, X isoform OS=Bos taurus OX=9913 GN=AMELX PE=1 SV=2	1	hf1_10472_ebo_34_1_261219.ScanId;v=1;d1=15099.15099.3	controllerType=0 controllerNumber=1 scan=15099	33.7549
19242:3	1	S.M[+15.995]PLPPHPGHPGYINFS[+79.966].Y		M[+16], S[+80]	619.614	3	1856.83	1856.82	0	4.7	17	Non	340.31	340.31	6.7	5.22	2376	>sp|P02817|AMELX_BOVIN Amelogenin, X isoform OS=Bos taurus OX=9913 GN=AMELX PE=1 SV=2	1	hf1_10472_ebo_34_1_261219.ScanId;v=1;d1=15294.15294.3	controllerType=0 controllerNumber=1 scan=15294	34.0932
24960:3	1	S.MPLPPHPGHPGYIN[+0.984]FS[+79.966].Y		N[+1], S[+80]	614.611	3	1841.82	1841.81	0	6.3	17	Non	345.9	272.18	266.35	5.1	2376	>sp|P02817|AMELX_BOVIN Amelogenin, X isoform OS=Bos taurus OX=9913 GN=AMELX PE=1 SV=2	1	hf1_10472_ebo_34_1_261219.ScanId;v=1;d1=19202.19202.3	controllerType=0 controllerNumber=1 scan=19202	40.7182
18275:3	1	S.MP[+15.995]LPPHPGHPGYIN[+0.984]FS.Y		N[+1], P[+16]	593.285	3	1777.84	1777.84	0	1.8	17	Non	351.24	269.41	5.8	4.44	2376	>sp|P02817|AMELX_BOVIN Amelogenin, X isoform OS=Bos taurus OX=9913 GN=AMELX PE=1 SV=2	1	hf1_10472_ebo_34_1_261219.ScanId;v=1;d1=14610.14610.3	controllerType=0 controllerNumber=1 scan=14610	32.9257
20093:3	1	S.M[+15.995]PLPPHPGHPGYINFS[+79.966].Y		M[+16], S[+80]	619.613	3	1856.83	1856.82	0	3.3	17	Non	355.64	355.64	8.16	5.2	2376	>sp|P02817|AMELX_BOVIN Amelogenin, X isoform OS=Bos taurus OX=9913 GN=AMELX PE=1 SV=2	1	hf1_10472_ebo_34_1_261219.ScanId;v=1;d1=15900.15900.3	controllerType=0 controllerNumber=1 scan=15900	35.117
25271:2	1	S.MPLPPHPGHPGYIN[+0.984]FS[+79.966].Y		N[+1], S[+80]	921.413	2	1841.82	1841.81	0	5.3	17	Non	362.21	362.21	221.46	6.01	2376	>sp|P02817|AMELX_BOVIN Amelogenin, X isoform OS=Bos taurus OX=9913 GN=AMELX PE=1 SV=2	1	hf1_10472_ebo_34_1_261219.ScanId;v=1;d1=19415.19415.2	controllerType=0 controllerNumber=1 scan=19415	41.0687
21151:2	1	S.M[+15.995]PLPPHPGHPGYINFS[+79.966].Y		M[+16], S[+80]	928.909	2	1856.81	1856.82	0	-4.6	17	Non	369.25	369.25	12.1	5.95	2376	>sp|P02817|AMELX_BOVIN Amelogenin, X isoform OS=Bos taurus OX=9913 GN=AMELX PE=1 SV=2	1	hf1_10472_ebo_34_1_261219.ScanId;v=1;d1=16644.16644.2	controllerType=0 controllerNumber=1 scan=16644	36.3922
20559:2	1	S.M[+15.995]PLPPHPGHPGYINFS[+79.966].Y		M[+16], S[+80]	928.91	2	1856.81	1856.82	0	-3.2	17	Non	377.22	377.22	6.98	5.95	2376	>sp|P02817|AMELX_BOVIN Amelogenin, X isoform OS=Bos taurus OX=9913 GN=AMELX PE=1 SV=2	1	hf1_10472_ebo_34_1_261219.ScanId;v=1;d1=16232.16232.2	controllerType=0 controllerNumber=1 scan=16232	35.6881
21747:2	1	S.M[+15.995]PLPPHPGHPGYINFS[+79.966].Y		M[+16], S[+80]	928.91	2	1856.81	1856.82	0	-3.6	17	Non	380.22	380.22	8	5.95	2376	>sp|P02817|AMELX_BOVIN Amelogenin, X isoform OS=Bos taurus OX=9913 GN=AMELX PE=1 SV=2	1	hf1_10472_ebo_34_1_261219.ScanId;v=1;d1=17056.17056.2	controllerType=0 controllerNumber=1 scan=17056	37.0941
19535:3	1	S.MP[+15.995]LPPHPGHPGYINFS[+79.966].Y		P[+16], S[+80]	619.614	3	1856.83	1856.82	0	4.5	17	Non	402.4	399.71	4	6.46	2376	>sp|P02817|AMELX_BOVIN Amelogenin, X isoform OS=Bos taurus OX=9913 GN=AMELX PE=1 SV=2	1	hf1_10472_ebo_34_1_261219.ScanId;v=1;d1=15493.15493.3	controllerType=0 controllerNumber=1 scan=15493	34.4327
20849:2	1	S.M[+15.995]PLPPHPGHPGYINFS[+79.966].Y		M[+16], S[+80]	928.91	2	1856.81	1856.82	0	-3.3	17	Non	502.73	502.73	24.4	6.42	2376	>sp|P02817|AMELX_BOVIN Amelogenin, X isoform OS=Bos taurus OX=9913 GN=AMELX PE=1 SV=2	1	hf1_10472_ebo_34_1_261219.ScanId;v=1;d1=16436.16436.2	controllerType=0 controllerNumber=1 scan=16436	36.0409
25060:2	1	S.MPLPPHPGHPGYIN[+0.984]FS[+79.966].Y		N[+1], S[+80]	921.413	2	1841.82	1841.81	0	5.4	17	Non	530.17	438.46	289.27	7.93	2376	>sp|P02817|AMELX_BOVIN Amelogenin, X isoform OS=Bos taurus OX=9913 GN=AMELX PE=1 SV=2	1	hf1_10472_ebo_34_1_261219.ScanId;v=1;d1=19269.19269.2	controllerType=0 controllerNumber=1 scan=19269	40.8312
18783:2	1	S.M[+15.995]PLPPHPGHPGYINFS[+79.966].Y		M[+16], S[+80]	928.911	2	1856.81	1856.82	0	-2.2	17	Non	531	531	10.31	7.06	2376	>sp|P02817|AMELX_BOVIN Amelogenin, X isoform OS=Bos taurus OX=9913 GN=AMELX PE=1 SV=2	1	hf1_10472_ebo_34_1_261219.ScanId;v=1;d1=14969.14969.2	controllerType=0 controllerNumber=1 scan=14969	33.539
24641:3	1	S.MPLPPHPGHPGYIN[+0.984]FS[+79.966].Y		N[+1], S[+80]	614.612	3	1841.82	1841.81	0	6.8	17	Non	534	424	362.44	7.6	2376	>sp|P02817|AMELX_BOVIN Amelogenin, X isoform OS=Bos taurus OX=9913 GN=AMELX PE=1 SV=2	1	hf1_10472_ebo_34_1_261219.ScanId;v=1;d1=18993.18993.3	controllerType=0 controllerNumber=1 scan=18993	40.3669
18823:2	1	S.M[+15.995]PLPPHPGHPGYINFS[+79.966].Y		M[+16], S[+80]	928.915	2	1856.82	1856.82	0	1.8	17	Non	540.89	540.89	20.73	7.32	2376	>sp|P02817|AMELX_BOVIN Amelogenin, X isoform OS=Bos taurus OX=9913 GN=AMELX PE=1 SV=2	1	hf1_10472_ebo_34_1_261219.ScanId;v=1;d1=14995.14995.2	controllerType=0 controllerNumber=1 scan=14995	33.5809
24330:3	1	S.MPLPPHPGHPGYIN[+0.984]FS[+79.966].Y		N[+1], S[+80]	614.612	3	1841.82	1841.81	0	7.6	17	Non	568.25	438.03	421.98	8.41	2376	>sp|P02817|AMELX_BOVIN Amelogenin, X isoform OS=Bos taurus OX=9913 GN=AMELX PE=1 SV=2	1	hf1_10472_ebo_34_1_261219.ScanId;v=1;d1=18784.18784.3	controllerType=0 controllerNumber=1 scan=18784	40.0131
20277:2	1	S.M[+15.995]PLPPHPGHPGYINFS[+79.966].Y		M[+16], S[+80]	928.916	2	1856.82	1856.82	0	3	17	Non	592.04	592.04	20.93	8.56	2376	>sp|P02817|AMELX_BOVIN Amelogenin, X isoform OS=Bos taurus OX=9913 GN=AMELX PE=1 SV=2	1	hf1_10472_ebo_34_1_261219.ScanId;v=1;d1=16028.16028.2	controllerType=0 controllerNumber=1 scan=16028	35.3339
19985:2	1	S.M[+15.995]PLPPHPGHPGYINFS[+79.966].Y		M[+16], S[+80]	928.918	2	1856.83	1856.82	0	5.5	17	Non	635.62	635.62	33.25	9.74	2376	>sp|P02817|AMELX_BOVIN Amelogenin, X isoform OS=Bos taurus OX=9913 GN=AMELX PE=1 SV=2	1	hf1_10472_ebo_34_1_261219.ScanId;v=1;d1=15824.15824.2	controllerType=0 controllerNumber=1 scan=15824	34.9888
24103:2	1	S.MPLPPHPGHPGYIN[+0.984]FS[+79.966].Y		N[+1], S[+80]	921.415	2	1841.82	1841.81	0	8	17	Non	652.09	652.09	313.24	10.79	2376	>sp|P02817|AMELX_BOVIN Amelogenin, X isoform OS=Bos taurus OX=9913 GN=AMELX PE=1 SV=2	1	hf1_10472_ebo_34_1_261219.ScanId;v=1;d1=18641.18641.2	controllerType=0 controllerNumber=1 scan=18641	39.7743
19111:2	1	S.M[+15.995]PLPPHPGHPGYINFS[+79.966].Y		M[+16], S[+80]	928.918	2	1856.83	1856.82	0	5.6	17	Non	654.22	654.22	27.88	10.74	2376	>sp|P02817|AMELX_BOVIN Amelogenin, X isoform OS=Bos taurus OX=9913 GN=AMELX PE=1 SV=2	1	hf1_10472_ebo_34_1_261219.ScanId;v=1;d1=15199.15199.2	controllerType=0 controllerNumber=1 scan=15199	33.928
19704:2	1	S.M[+15.995]PLPPHPGHPGYINFS[+79.966].Y		M[+16], S[+80]	928.918	2	1856.83	1856.82	0	5.5	17	Non	664.76	664.76	46.08	10.74	2376	>sp|P02817|AMELX_BOVIN Amelogenin, X isoform OS=Bos taurus OX=9913 GN=AMELX PE=1 SV=2	1	hf1_10472_ebo_34_1_261219.ScanId;v=1;d1=15614.15614.2	controllerType=0 controllerNumber=1 scan=15614	34.6358
24743:2	1	S.MPLPPHPGHPGYIN[+0.984]FS[+79.966].Y		N[+1], S[+80]	921.413	2	1841.82	1841.81	0	5.2	17	Non	669.57	669.57	379.03	10.74	2376	>sp|P02817|AMELX_BOVIN Amelogenin, X isoform OS=Bos taurus OX=9913 GN=AMELX PE=1 SV=2	1	hf1_10472_ebo_34_1_261219.ScanId;v=1;d1=19059.19059.2	controllerType=0 controllerNumber=1 scan=19059	40.4776
19397:2	1	S.M[+15.995]PLPPHPGHPGYINFS[+79.966].Y		M[+16], S[+80]	928.918	2	1856.83	1856.82	0	5.4	17	Non	686.43	686.43	38.09	10.74	2376	>sp|P02817|AMELX_BOVIN Amelogenin, X isoform OS=Bos taurus OX=9913 GN=AMELX PE=1 SV=2	1	hf1_10472_ebo_34_1_261219.ScanId;v=1;d1=15401.15401.2	controllerType=0 controllerNumber=1 scan=15401	34.2817
24429:2	1	S.MPLPPHPGHPGYIN[+0.984]FS[+79.966].Y		N[+1], S[+80]	921.412	2	1841.82	1841.81	0	4.8	17	Non	735.64	550.09	398.55	11.74	2376	>sp|P02817|AMELX_BOVIN Amelogenin, X isoform OS=Bos taurus OX=9913 GN=AMELX PE=1 SV=2	1	hf1_10472_ebo_34_1_261219.ScanId;v=1;d1=18850.18850.2	controllerType=0 controllerNumber=1 scan=18850	40.1291
20891:3	1	S.M[+15.995]PLPPHPGHPGYIN[+0.984]FS[+79.966].Y		M[+16], N[+1], S[+80]	619.943	3	1857.81	1857.8	0	6	17	Non	39.18	39.18	4.31	0.49	2376	>sp|P02817|AMELX_BOVIN Amelogenin, X isoform OS=Bos taurus OX=9913 GN=AMELX PE=1 SV=2	1	hf1_10472_ebo_34_1_261219.ScanId;v=1;d1=16462.16462.2	controllerType=0 controllerNumber=1 scan=16462	36.0835
19364:3	1	S.M[+15.995]PLPPHP[+15.995]GHPGYINFS[+79.966].Y		M[+16], P[+16], S[+80]	624.94	3	1872.81	1872.81	0	-4.7	17	Non	49.31	49.31	2.51	0.32	2376	>sp|P02817|AMELX_BOVIN Amelogenin, X isoform OS=Bos taurus OX=9913 GN=AMELX PE=1 SV=2	1	hf1_10472_ebo_34_1_261219.ScanId;v=1;d1=15379.15379.2	controllerType=0 controllerNumber=1 scan=15379	34.2457
49994:3	1	S.MP[+15.995]LPPHPGH[+15.995]PGYINFS[+79.966].Y		H[+16], P[+16], S[+80]	624.947	3	1872.83	1872.81	0	6.1	17	Non	81.93	81.93	0	0.99	2376	>sp|P02817|AMELX_BOVIN Amelogenin, X isoform OS=Bos taurus OX=9913 GN=AMELX PE=1 SV=2	1	hf1_10472_ebo_34_1_261219.ScanId;v=1;d1=36658.36658.3	controllerType=0 controllerNumber=1 scan=36658	73.5219
18057:3	1	S.M[+15.995]PLPPHPGHPGY[+15.995]INFS[+79.966].Y		M[+16], S[+80], Y[+16]	624.947	3	1872.83	1872.81	0	6.1	17	Non	90.96	90.96	1.97	0.99	2376	>sp|P02817|AMELX_BOVIN Amelogenin, X isoform OS=Bos taurus OX=9913 GN=AMELX PE=1 SV=2	1	hf1_10472_ebo_34_1_261219.ScanId;v=1;d1=14457.14457.3	controllerType=0 controllerNumber=1 scan=14457	32.6676
22106:3	1	S.MP[+31.990]LPPHPGHPGYIN[+0.984]FS[+79.966].Y		N[+1], P[+32], S[+80]	625.274	3	1873.81	1873.8	0	5.7	17	Non	107.87	42.97	1.8	0.49	2376	>sp|P02817|AMELX_BOVIN Amelogenin, X isoform OS=Bos taurus OX=9913 GN=AMELX PE=1 SV=2	1	hf1_10472_ebo_34_1_261219.ScanId;v=1;d1=17294.17294.3	controllerType=0 controllerNumber=1 scan=17294	37.4903
19761:2	1	S.M[+31.990]PLPPHPGHPGYIN[+0.984]FS[+79.966].Y		M[+32], N[+1], S[+80]	937.406	2	1873.81	1873.8	0	4	17	Non	134.91	90.61	0	0.56	2376	>sp|P02817|AMELX_BOVIN Amelogenin, X isoform OS=Bos taurus OX=9913 GN=AMELX PE=1 SV=2	1	hf1_10472_ebo_34_1_261219.ScanId;v=1;d1=15659.15659.2	controllerType=0 controllerNumber=1 scan=15659	34.7096
21905:3	1	S.MP[+31.990]LPPHPGHPGYIN[+0.984]FS[+79.966].Y		N[+1], P[+32], S[+80]	625.274	3	1873.81	1873.8	0	4.6	17	Non	167.68	90.19	1.8	0.99	2376	>sp|P02817|AMELX_BOVIN Amelogenin, X isoform OS=Bos taurus OX=9913 GN=AMELX PE=1 SV=2	1	hf1_10472_ebo_34_1_261219.ScanId;v=1;d1=17157.17157.3	controllerType=0 controllerNumber=1 scan=17157	37.2655
21586:3	1	S.M[+31.990]PLPPHPGHPGYIN[+0.984]FS[+79.966].Y		M[+32], N[+1], S[+80]	625.273	3	1873.8	1873.8	0	3.5	17	Non	170.17	134.96	4.63	0.82	2376	>sp|P02817|AMELX_BOVIN Amelogenin, X isoform OS=Bos taurus OX=9913 GN=AMELX PE=1 SV=2	1	hf1_10472_ebo_34_1_261219.ScanId;v=1;d1=16947.16947.3	controllerType=0 controllerNumber=1 scan=16947	36.9077
17449:3	1	S.MP[+15.995]LPPHPGHPGYINF[+15.995]S[+79.966].Y		F[+16], P[+16], S[+80]	624.945	3	1872.82	1872.81	0	3.4	17	Non	176.88	176.88	5.8	2.48	2376	>sp|P02817|AMELX_BOVIN Amelogenin, X isoform OS=Bos taurus OX=9913 GN=AMELX PE=1 SV=2	1	hf1_10472_ebo_34_1_261219.ScanId;v=1;d1=14020.14020.3	controllerType=0 controllerNumber=1 scan=14020	31.9146
17847:2	1	S.M[+15.995]PLPPHPGH[+15.995]PGYINFS[+79.966].Y		H[+16], M[+16], S[+80]	936.915	2	1872.82	1872.81	0	5.1	17	Non	181.22	181.22	1.97	2.81	2376	>sp|P02817|AMELX_BOVIN Amelogenin, X isoform OS=Bos taurus OX=9913 GN=AMELX PE=1 SV=2	1	hf1_10472_ebo_34_1_261219.ScanId;v=1;d1=14303.14303.2	controllerType=0 controllerNumber=1 scan=14303	32.4052
20109:3	1	S.MP[+15.995]LPPHPGHP[+15.995]GYINFS[+79.966].Y		P[+16]*2, S[+80]	624.94	3	1872.8	1872.81	0	-5	17	Non	189.93	189.93	5.8	2.31	2376	>sp|P02817|AMELX_BOVIN Amelogenin, X isoform OS=Bos taurus OX=9913 GN=AMELX PE=1 SV=2	1	hf1_10472_ebo_34_1_261219.ScanId;v=1;d1=15913.15913.3	controllerType=0 controllerNumber=1 scan=15913	35.1358
19540:3	1	S.MP[+15.995]LPPHPGHP[+15.995]GYINFS[+79.966].Y		P[+16]*2, S[+80]	624.94	3	1872.81	1872.81	0	-4.1	17	Non	206.24	206.24	4.43	2.46	2376	>sp|P02817|AMELX_BOVIN Amelogenin, X isoform OS=Bos taurus OX=9913 GN=AMELX PE=1 SV=2	1	hf1_10472_ebo_34_1_261219.ScanId;v=1;d1=15498.15498.3	controllerType=0 controllerNumber=1 scan=15498	34.4389
22764:3	1	S.MPLPPHP[+15.995]GHPGYIN[+0.984]FS[+79.966].Y		N[+1], P[+16], S[+80]	619.943	3	1857.82	1857.8	0	6.5	17	Non	216.57	216.57	10.01	2.83	2376	>sp|P02817|AMELX_BOVIN Amelogenin, X isoform OS=Bos taurus OX=9913 GN=AMELX PE=1 SV=2	1	hf1_10472_ebo_34_1_261219.ScanId;v=1;d1=17748.17748.3	controllerType=0 controllerNumber=1 scan=17748	38.2661
19829:3	1	S.MP[+15.995]LPPHPGHP[+15.995]GYINFS[+79.966].Y		P[+16]*2, S[+80]	624.939	3	1872.8	1872.81	0	-6.5	17	Non	223.22	223.22	5.23	2.39	2376	>sp|P02817|AMELX_BOVIN Amelogenin, X isoform OS=Bos taurus OX=9913 GN=AMELX PE=1 SV=2	1	hf1_10472_ebo_34_1_261219.ScanId;v=1;d1=15708.15708.3	controllerType=0 controllerNumber=1 scan=15708	34.7906
18358:3	1	S.M[+15.995]PLPPHPGHP[+15.995]GYINFS[+79.966].Y		M[+16], P[+16], S[+80]	624.946	3	1872.82	1872.81	0	5.7	17	Non	235.72	235.72	5.66	3.1	2376	>sp|P02817|AMELX_BOVIN Amelogenin, X isoform OS=Bos taurus OX=9913 GN=AMELX PE=1 SV=2	1	hf1_10472_ebo_34_1_261219.ScanId;v=1;d1=14666.14666.3	controllerType=0 controllerNumber=1 scan=14666	33.0186
19472:2	1	S.M[+15.995]PLPPHPGHPGY[+15.995]INFS[+79.966].Y		M[+16], S[+80], Y[+16]	936.912	2	1872.82	1872.81	0	1.4	17	Non	237.46	237.46	0	3.88	2376	>sp|P02817|AMELX_BOVIN Amelogenin, X isoform OS=Bos taurus OX=9913 GN=AMELX PE=1 SV=2	1	hf1_10472_ebo_34_1_261219.ScanId;v=1;d1=15450.15450.2	controllerType=0 controllerNumber=1 scan=15450	34.3609
20410:3	1	S.MP[+15.995]LP[+15.995]PHPGHPGYINFS[+79.966].Y		P[+16]*2, S[+80]	624.94	3	1872.81	1872.81	0	-4.7	17	Non	241.14	241.14	4.38	3.06	2376	>sp|P02817|AMELX_BOVIN Amelogenin, X isoform OS=Bos taurus OX=9913 GN=AMELX PE=1 SV=2	1	hf1_10472_ebo_34_1_261219.ScanId;v=1;d1=16122.16122.3	controllerType=0 controllerNumber=1 scan=16122	35.4922
18649:3	1	S.M[+15.995]PLPPHPGHP[+15.995]GYINFS[+79.966].Y		M[+16], P[+16], S[+80]	624.946	3	1872.82	1872.81	0	5	17	Non	242.74	242.74	4.91	4.26	2376	>sp|P02817|AMELX_BOVIN Amelogenin, X isoform OS=Bos taurus OX=9913 GN=AMELX PE=1 SV=2	1	hf1_10472_ebo_34_1_261219.ScanId;v=1;d1=14867.14867.3	controllerType=0 controllerNumber=1 scan=14867	33.3613
22700:2	1	S.M[+15.995]PLP[+15.995]PHPGHPGYINFS[+79.966].Y		M[+16], P[+16], S[+80]	936.901	2	1872.8	1872.81	0	-9.8	17	Non	251.71	251.71	15.39	3.15	2376	>sp|P02817|AMELX_BOVIN Amelogenin, X isoform OS=Bos taurus OX=9913 GN=AMELX PE=1 SV=2	1	hf1_10472_ebo_34_1_261219.ScanId;v=1;d1=17704.17704.2	controllerType=0 controllerNumber=1 scan=17704	38.1951
20105:2	1	S.M[+15.995]PLPPHPGH[+15.995]PGYINFS[+79.966].Y		H[+16], M[+16], S[+80]	936.907	2	1872.81	1872.81	0	-4.3	17	Non	253.47	253.47	0.69	3.89	2376	>sp|P02817|AMELX_BOVIN Amelogenin, X isoform OS=Bos taurus OX=9913 GN=AMELX PE=1 SV=2	1	hf1_10472_ebo_34_1_261219.ScanId;v=1;d1=15909.15909.2	controllerType=0 controllerNumber=1 scan=15909	35.1284
20396:2	1	S.M[+15.995]PLP[+15.995]PHPGHPGYINFS[+79.966].Y		M[+16], P[+16], S[+80]	936.908	2	1872.81	1872.81	0	-2.7	17	Non	261.09	261.09	1.74	3.92	2376	>sp|P02817|AMELX_BOVIN Amelogenin, X isoform OS=Bos taurus OX=9913 GN=AMELX PE=1 SV=2	1	hf1_10472_ebo_34_1_261219.ScanId;v=1;d1=16112.16112.2	controllerType=0 controllerNumber=1 scan=16112	35.4773
24172:3	1	S.MPLPPHPGHP[+15.995]GYIN[+0.984]FS[+79.966].Y		N[+1], P[+16], S[+80]	619.943	3	1857.81	1857.8	0	6	17	Non	286.83	258.24	6.53	4.45	2376	>sp|P02817|AMELX_BOVIN Amelogenin, X isoform OS=Bos taurus OX=9913 GN=AMELX PE=1 SV=2	1	hf1_10472_ebo_34_1_261219.ScanId;v=1;d1=18687.18687.3	controllerType=0 controllerNumber=1 scan=18687	39.8511
19266:2	1	S.M[+15.995]PLPPHPGHPGY[+15.995]INFS[+79.966].Y		M[+16], S[+80], Y[+16]	936.915	2	1872.82	1872.81	0	4.3	17	Non	319	319	1.6	4.86	2376	>sp|P02817|AMELX_BOVIN Amelogenin, X isoform OS=Bos taurus OX=9913 GN=AMELX PE=1 SV=2	1	hf1_10472_ebo_34_1_261219.ScanId;v=1;d1=15310.15310.2	controllerType=0 controllerNumber=1 scan=15310	34.1185
22161:3	1	S.MP[+15.995]LPPHPGHPGYIN[+0.984]FS[+79.966].Y		N[+1], P[+16], S[+80]	619.942	3	1857.81	1857.8	0	3.9	17	Non	330.48	329.2	0.86	4.98	2376	>sp|P02817|AMELX_BOVIN Amelogenin, X isoform OS=Bos taurus OX=9913 GN=AMELX PE=1 SV=2	1	hf1_10472_ebo_34_1_261219.ScanId;v=1;d1=17329.17329.3	controllerType=0 controllerNumber=1 scan=17329	37.5549
23763:3	1	S.MPLPPHPGHP[+15.995]GYIN[+0.984]FS[+79.966].Y		N[+1], P[+16], S[+80]	619.942	3	1857.81	1857.8	0	5	17	Non	376.96	286.03	5.41	5.04	2376	>sp|P02817|AMELX_BOVIN Amelogenin, X isoform OS=Bos taurus OX=9913 GN=AMELX PE=1 SV=2	1	hf1_10472_ebo_34_1_261219.ScanId;v=1;d1=18412.18412.3	controllerType=0 controllerNumber=1 scan=18412	39.3855
18122:2	1	S.M[+15.995]PLPPHPGHPGY[+15.995]INFS[+79.966].Y		M[+16], S[+80], Y[+16]	936.917	2	1872.83	1872.81	0	6.6	17	Non	406.17	406.17	1.96	6.8	2376	>sp|P02817|AMELX_BOVIN Amelogenin, X isoform OS=Bos taurus OX=9913 GN=AMELX PE=1 SV=2	1	hf1_10472_ebo_34_1_261219.ScanId;v=1;d1=14505.14505.2	controllerType=0 controllerNumber=1 scan=14505	32.7491
21849:3	1	S.MP[+15.995]LPPHPGHPGYIN[+0.984]FS[+79.966].Y		N[+1], P[+16], S[+80]	619.943	3	1857.81	1857.8	0	6.1	17	Non	437.09	396.02	5.8	6.69	2376	>sp|P02817|AMELX_BOVIN Amelogenin, X isoform OS=Bos taurus OX=9913 GN=AMELX PE=1 SV=2	1	hf1_10472_ebo_34_1_261219.ScanId;v=1;d1=17120.17120.3	controllerType=0 controllerNumber=1 scan=17120	37.2016
21538:3	1	S.M[+15.995]PLPPHPGHPGYIN[+0.984]FS[+79.966].Y		M[+16], N[+1], S[+80]	619.942	3	1857.81	1857.8	0	4.6	17	Non	449.62	443.21	3.29	6.73	2376	>sp|P02817|AMELX_BOVIN Amelogenin, X isoform OS=Bos taurus OX=9913 GN=AMELX PE=1 SV=2	1	hf1_10472_ebo_34_1_261219.ScanId;v=1;d1=16913.16913.3	controllerType=0 controllerNumber=1 scan=16913	36.8501
18592:2	1	S.M[+15.995]PLPPHP[+15.995]GHPGYINFS[+79.966].Y		M[+16], P[+16], S[+80]	936.917	2	1872.83	1872.81	0	6.4	17	Non	456.25	456.25	7.44	6.86	2376	>sp|P02817|AMELX_BOVIN Amelogenin, X isoform OS=Bos taurus OX=9913 GN=AMELX PE=1 SV=2	1	hf1_10472_ebo_34_1_261219.ScanId;v=1;d1=14826.14826.2	controllerType=0 controllerNumber=1 scan=14826	33.2853
22319:2	1	S.M[+15.995]PLPPHPGHPGYIN[+0.984]FS[+79.966].Y		M[+16], N[+1], S[+80]	929.41	2	1857.81	1857.8	0	5.7	17	Non	458.04	397.69	8.02	6.81	2376	>sp|P02817|AMELX_BOVIN Amelogenin, X isoform OS=Bos taurus OX=9913 GN=AMELX PE=1 SV=2	1	hf1_10472_ebo_34_1_261219.ScanId;v=1;d1=17439.17439.2	controllerType=0 controllerNumber=1 scan=17439	37.738
21446:2	1	S.M[+15.995]PLPPHPGHPGYIN[+0.984]FS[+79.966].Y		M[+16], N[+1], S[+80]	929.41	2	1857.81	1857.8	0	5.7	17	Non	595.33	511.42	30.58	8.74	2376	>sp|P02817|AMELX_BOVIN Amelogenin, X isoform OS=Bos taurus OX=9913 GN=AMELX PE=1 SV=2	1	hf1_10472_ebo_34_1_261219.ScanId;v=1;d1=16847.16847.2	controllerType=0 controllerNumber=1 scan=16847	36.7396
21748:2	1	S.M[+15.995]PLPPHPGHPGYIN[+0.984]FS[+79.966].Y		M[+16], N[+1], S[+80]	929.411	2	1857.81	1857.8	0	6.2	17	Non	597.58	526.01	24.88	8.74	2376	>sp|P02817|AMELX_BOVIN Amelogenin, X isoform OS=Bos taurus OX=9913 GN=AMELX PE=1 SV=2	1	hf1_10472_ebo_34_1_261219.ScanId;v=1;d1=17056.17056.2	controllerType=0 controllerNumber=1 scan=17056	37.0941
24005:3	1	S.MPLPPHPGHP[+31.990]GY[+15.995]IN[+0.984]F[+31.990]S.Y		F[+32], N[+1], P[+32], Y[+16]	614.615	3	1841.83	1841.82	0	7.4	17	Non	153.81	153.81	2.65	2.33	2376	>sp|P02817|AMELX_BOVIN Amelogenin, X isoform OS=Bos taurus OX=9913 GN=AMELX PE=1 SV=2	1	hf1_10472_ebo_34_1_261219.ScanId;v=1;d1=18577.18577.3	controllerType=0 controllerNumber=1 scan=18577	39.6627
22030:3	1	S.MPLPPHPGHPGYINFSY.E			641.979	3	1923.92	1923.92	0	-0.1	17	Non	233.49	30.42	30.42	0.72	2376	>sp|P02817|AMELX_BOVIN Amelogenin, X isoform OS=Bos taurus OX=9913 GN=AMELX PE=1 SV=2	1	hf1_10472_ebo_34_1_261219.ScanId;v=1;d1=17239.17239.3	controllerType=0 controllerNumber=1 scan=17239	37.3972
25544:3	1	S.MPLPPHPGHPGYINFS[+79.966]Y.E		S[+80]	668.638	3	2003.9	2003.89	0	6.6	17	Non	224.86	116.99	116.99	2.31	2376	>sp|P02817|AMELX_BOVIN Amelogenin, X isoform OS=Bos taurus OX=9913 GN=AMELX PE=1 SV=2	1	hf1_10472_ebo_34_1_261219.ScanId;v=1;d1=19601.19601.3	controllerType=0 controllerNumber=1 scan=19601	41.3821
26342:2	1	S.MPLPPHPGHPGYINFS[+79.966]Y.E		S[+80]	1002.45	2	2003.9	2003.89	0	5.5	17	Non	333.39	257.12	188.29	4.91	2376	>sp|P02817|AMELX_BOVIN Amelogenin, X isoform OS=Bos taurus OX=9913 GN=AMELX PE=1 SV=2	1	hf1_10472_ebo_34_1_261219.ScanId;v=1;d1=20126.20126.2	controllerType=0 controllerNumber=1 scan=20126	42.2639
26241:3	1	S.MPLPPHPGHPGYINFS[+79.966]Y.E		S[+80]	668.638	3	2003.9	2003.89	0	6.2	17	Non	363.25	187.64	187.64	4.68	2376	>sp|P02817|AMELX_BOVIN Amelogenin, X isoform OS=Bos taurus OX=9913 GN=AMELX PE=1 SV=2	1	hf1_10472_ebo_34_1_261219.ScanId;v=1;d1=20059.20059.3	controllerType=0 controllerNumber=1 scan=20059	42.1514
25673:2	1	S.MPLPPHPGHPGYINFS[+79.966]Y.E		S[+80]	1002.45	2	2003.9	2003.89	0	6.9	17	Non	393.76	393.76	170.73	6.75	2376	>sp|P02817|AMELX_BOVIN Amelogenin, X isoform OS=Bos taurus OX=9913 GN=AMELX PE=1 SV=2	1	hf1_10472_ebo_34_1_261219.ScanId;v=1;d1=19685.19685.2	controllerType=0 controllerNumber=1 scan=19685	41.5247
25852:3	1	S.MPLPPHPGHPGYINFS[+79.966]Y.E		S[+80]	668.638	3	2003.9	2003.89	0	5.5	17	Non	485.69	318.3	318.3	5.57	2376	>sp|P02817|AMELX_BOVIN Amelogenin, X isoform OS=Bos taurus OX=9913 GN=AMELX PE=1 SV=2	1	hf1_10472_ebo_34_1_261219.ScanId;v=1;d1=19804.19804.3	controllerType=0 controllerNumber=1 scan=19804	41.7245
26024:2	1	S.MPLPPHPGHPGYINFS[+79.966]Y.E		S[+80]	1002.45	2	2003.9	2003.89	0	5.5	17	Non	507.84	334.61	259.36	6.24	2376	>sp|P02817|AMELX_BOVIN Amelogenin, X isoform OS=Bos taurus OX=9913 GN=AMELX PE=1 SV=2	1	hf1_10472_ebo_34_1_261219.ScanId;v=1;d1=19918.19918.2	controllerType=0 controllerNumber=1 scan=19918	41.9151
17720:3	1	S.MP[+15.995]LPPHPGHPGYINFSY[+15.995].E		P[+16], Y[+16]	652.648	3	1955.93	1955.91	0	9	17	Non	189.8	11.28	1.67	0.35	2376	>sp|P02817|AMELX_BOVIN Amelogenin, X isoform OS=Bos taurus OX=9913 GN=AMELX PE=1 SV=2	1	hf1_10472_ebo_34_1_261219.ScanId;v=1;d1=14213.14213.3	controllerType=0 controllerNumber=1 scan=14213	32.2489
22644:3	1	S.MP[+15.995]LPPHPGHPGYINFS[+79.966]Y.E		P[+16], S[+80]	673.97	3	2019.9	2019.88	0	6.8	17	Non	205.86	62.48	5.43	0.87	2376	>sp|P02817|AMELX_BOVIN Amelogenin, X isoform OS=Bos taurus OX=9913 GN=AMELX PE=1 SV=2	1	hf1_10472_ebo_34_1_261219.ScanId;v=1;d1=17666.17666.3	controllerType=0 controllerNumber=1 scan=17666	38.1282
26710:3	1	S.MPLPPHPGHPGYIN[+0.984]FS[+79.966]Y.E		N[+1], S[+80]	668.966	3	2004.88	2004.87	0	5.7	17	Non	349.01	205.15	205.15	4.34	2376	>sp|P02817|AMELX_BOVIN Amelogenin, X isoform OS=Bos taurus OX=9913 GN=AMELX PE=1 SV=2	1	hf1_10472_ebo_34_1_261219.ScanId;v=1;d1=20373.20373.3	controllerType=0 controllerNumber=1 scan=20373	42.6822
23661:2	1	S.M[+15.995]PLPPHPGHPGYINFS[+79.966]Y.E		M[+16], S[+80]	1010.45	2	2019.89	2019.88	0	4.6	17	Non	354.75	354.75	12.51	5.59	2376	>sp|P02817|AMELX_BOVIN Amelogenin, X isoform OS=Bos taurus OX=9913 GN=AMELX PE=1 SV=2	1	hf1_10472_ebo_34_1_261219.ScanId;v=1;d1=18346.18346.2	controllerType=0 controllerNumber=1 scan=18346	39.2739
26769:2	1	S.MPLPPHPGHPGYIN[+0.984]FS[+79.966]Y.E		N[+1], S[+80]	1002.95	2	2004.88	2004.87	0	6.2	17	Non	360.85	262.68	194.49	5.43	2376	>sp|P02817|AMELX_BOVIN Amelogenin, X isoform OS=Bos taurus OX=9913 GN=AMELX PE=1 SV=2	1	hf1_10472_ebo_34_1_261219.ScanId;v=1;d1=20409.20409.2	controllerType=0 controllerNumber=1 scan=20409	42.7415
23886:3	1	S.M[+15.995]PLPPHPGHPGYINFS[+79.966]Y.E		M[+16], S[+80]	673.962	3	2019.87	2019.88	0	-5.2	17	Non	368.06	368.06	5.9	5.01	2376	>sp|P02817|AMELX_BOVIN Amelogenin, X isoform OS=Bos taurus OX=9913 GN=AMELX PE=1 SV=2	1	hf1_10472_ebo_34_1_261219.ScanId;v=1;d1=18498.18498.3	controllerType=0 controllerNumber=1 scan=18498	39.531
23579:3	1	S.M[+15.995]PLPPHPGHPGYINFS[+79.966]Y.E		M[+16], S[+80]	673.97	3	2019.89	2019.88	0	6.1	17	Non	382.85	159	14.03	4.4	2376	>sp|P02817|AMELX_BOVIN Amelogenin, X isoform OS=Bos taurus OX=9913 GN=AMELX PE=1 SV=2	1	hf1_10472_ebo_34_1_261219.ScanId;v=1;d1=18290.18290.3	controllerType=0 controllerNumber=1 scan=18290	39.178
23269:3	1	S.M[+15.995]PLPPHPGHPGYINFS[+79.966]Y.E		M[+16], S[+80]	673.969	3	2019.89	2019.88	0	4.9	17	Non	407.09	193.51	24.12	5	2376	>sp|P02817|AMELX_BOVIN Amelogenin, X isoform OS=Bos taurus OX=9913 GN=AMELX PE=1 SV=2	1	hf1_10472_ebo_34_1_261219.ScanId;v=1;d1=18080.18080.3	controllerType=0 controllerNumber=1 scan=18080	38.8254
22949:3	1	S.M[+15.995]PLPPHPGHPGYINFS[+79.966]Y.E		M[+16], S[+80]	673.969	3	2019.89	2019.88	0	5.5	17	Non	414.04	223.93	12.81	5.22	2376	>sp|P02817|AMELX_BOVIN Amelogenin, X isoform OS=Bos taurus OX=9913 GN=AMELX PE=1 SV=2	1	hf1_10472_ebo_34_1_261219.ScanId;v=1;d1=17869.17869.3	controllerType=0 controllerNumber=1 scan=17869	38.4702
22721:2	1	S.M[+15.995]PLPPHPGHPGYINFS[+79.966]Y.E		M[+16], S[+80]	1010.45	2	2019.9	2019.88	0	7	17	Non	416.33	416.33	24.85	7.03	2376	>sp|P02817|AMELX_BOVIN Amelogenin, X isoform OS=Bos taurus OX=9913 GN=AMELX PE=1 SV=2	1	hf1_10472_ebo_34_1_261219.ScanId;v=1;d1=17718.17718.2	controllerType=0 controllerNumber=1 scan=17718	38.2173
23356:2	1	S.M[+15.995]PLPPHPGHPGYINFS[+79.966]Y.E		M[+16], S[+80]	1010.45	2	2019.89	2019.88	0	6.3	17	Non	436.61	436.61	22.1	7.07	2376	>sp|P02817|AMELX_BOVIN Amelogenin, X isoform OS=Bos taurus OX=9913 GN=AMELX PE=1 SV=2	1	hf1_10472_ebo_34_1_261219.ScanId;v=1;d1=18137.18137.2	controllerType=0 controllerNumber=1 scan=18137	38.9216
23029:2	1	S.M[+15.995]PLPPHPGHPGYINFS[+79.966]Y.E		M[+16], S[+80]	1010.45	2	2019.89	2019.88	0	4.4	17	Non	479.52	479.52	20.65	6.87	2376	>sp|P02817|AMELX_BOVIN Amelogenin, X isoform OS=Bos taurus OX=9913 GN=AMELX PE=1 SV=2	1	hf1_10472_ebo_34_1_261219.ScanId;v=1;d1=17924.17924.2	controllerType=0 controllerNumber=1 scan=17924	38.5612
24636:3	1	S.M[+15.995]PLPPHPGHPGYIN[+0.984]FS[+79.966]Y.E		M[+16], N[+1], S[+80]	674.298	3	2020.88	2020.87	0	6.1	17	Non	258.85	140.26	6.76	2.82	2376	>sp|P02817|AMELX_BOVIN Amelogenin, X isoform OS=Bos taurus OX=9913 GN=AMELX PE=1 SV=2	1	hf1_10472_ebo_34_1_261219.ScanId;v=1;d1=18989.18989.3	controllerType=0 controllerNumber=1 scan=18989	40.3581
23975:2	1	S.MP[+15.995]LPPHPGHPGYIN[+0.984]FS[+79.966]Y.E		N[+1], P[+16], S[+80]	1010.95	2	2020.89	2020.87	0	9.7	17	Non	288.52	171.26	5.88	3.8	2376	>sp|P02817|AMELX_BOVIN Amelogenin, X isoform OS=Bos taurus OX=9913 GN=AMELX PE=1 SV=2	1	hf1_10472_ebo_34_1_261219.ScanId;v=1;d1=18556.18556.2	controllerType=0 controllerNumber=1 scan=18556	39.6272
24244:3	1	S.M[+15.995]PLPPHPGHPGYIN[+0.984]FS[+79.966]Y.E		M[+16], N[+1], S[+80]	674.298	3	2020.88	2020.87	0	6.7	17	Non	304.03	138.85	3.55	3.02	2376	>sp|P02817|AMELX_BOVIN Amelogenin, X isoform OS=Bos taurus OX=9913 GN=AMELX PE=1 SV=2	1	hf1_10472_ebo_34_1_261219.ScanId;v=1;d1=18734.18734.3	controllerType=0 controllerNumber=1 scan=18734	39.9291
23887:3	1	S.M[+15.995]PLPPHPGHPGYIN[+0.984]FS[+79.966]Y.E		M[+16], N[+1], S[+80]	674.298	3	2020.88	2020.87	0	6.1	17	Non	327.94	166.26	4.27	4.14	2376	>sp|P02817|AMELX_BOVIN Amelogenin, X isoform OS=Bos taurus OX=9913 GN=AMELX PE=1 SV=2	1	hf1_10472_ebo_34_1_261219.ScanId;v=1;d1=18498.18498.3	controllerType=0 controllerNumber=1 scan=18498	39.531
25079:3	1	S.MPLPPHPGHPGYINFS[+79.966]YE.V		S[+80]	711.652	3	2132.94	2132.93	0	5.8	17	Non	330.03	330.03	262.72	5.16	2376	>sp|P02817|AMELX_BOVIN Amelogenin, X isoform OS=Bos taurus OX=9913 GN=AMELX PE=1 SV=2	1	hf1_10472_ebo_34_1_261219.ScanId;v=1;d1=19281.19281.3	controllerType=0 controllerNumber=1 scan=19281	40.8481
25332:2	1	S.MPLPPHPGHPGYINFS[+79.966]YE.V		S[+80]	1066.97	2	2132.94	2132.93	0	5.3	17	Non	375.29	375.29	235.29	6.71	2376	>sp|P02817|AMELX_BOVIN Amelogenin, X isoform OS=Bos taurus OX=9913 GN=AMELX PE=1 SV=2	1	hf1_10472_ebo_34_1_261219.ScanId;v=1;d1=19455.19455.2	controllerType=0 controllerNumber=1 scan=19455	41.1381
24764:3	1	S.MPLPPHPGHPGYINFS[+79.966]YE.V		S[+80]	711.652	3	2132.94	2132.93	0	5.6	17	Non	396.3	396.3	243.94	6.36	2376	>sp|P02817|AMELX_BOVIN Amelogenin, X isoform OS=Bos taurus OX=9913 GN=AMELX PE=1 SV=2	1	hf1_10472_ebo_34_1_261219.ScanId;v=1;d1=19074.19074.3	controllerType=0 controllerNumber=1 scan=19074	40.4991
24713:2	1	S.MPLPPHPGHPGYINFS[+79.966]YE.V		S[+80]	1066.98	2	2132.95	2132.93	0	8.4	17	Non	471.3	471.3	278.56	6.23	2376	>sp|P02817|AMELX_BOVIN Amelogenin, X isoform OS=Bos taurus OX=9913 GN=AMELX PE=1 SV=2	1	hf1_10472_ebo_34_1_261219.ScanId;v=1;d1=19040.19040.2	controllerType=0 controllerNumber=1 scan=19040	40.4442
25027:2	1	S.MPLPPHPGHPGYINFS[+79.966]YE.V		S[+80]	1066.98	2	2132.95	2132.93	0	7	17	Non	629.6	629.6	348.33	9.79	2376	>sp|P02817|AMELX_BOVIN Amelogenin, X isoform OS=Bos taurus OX=9913 GN=AMELX PE=1 SV=2	1	hf1_10472_ebo_34_1_261219.ScanId;v=1;d1=19246.19246.2	controllerType=0 controllerNumber=1 scan=19246	40.7921
25822:2	1	S.MPLPPHPGHPGYIN[+0.984]FS[+79.966]YE.V		N[+1], S[+80]	1067.47	2	2133.93	2133.91	0	8.4	17	Non	247.91	247.91	199.97	3.83	2376	>sp|P02817|AMELX_BOVIN Amelogenin, X isoform OS=Bos taurus OX=9913 GN=AMELX PE=1 SV=2	1	hf1_10472_ebo_34_1_261219.ScanId;v=1;d1=19784.19784.2	controllerType=0 controllerNumber=1 scan=19784	41.6899
22648:2	1	S.M[+15.995]PLPPHPGHPGYINFS[+79.966]YE.V		M[+16], S[+80]	1074.97	2	2148.93	2148.92	0	0.4	17	Non	259.08	259.08	11.17	4.07	2376	>sp|P02817|AMELX_BOVIN Amelogenin, X isoform OS=Bos taurus OX=9913 GN=AMELX PE=1 SV=2	1	hf1_10472_ebo_34_1_261219.ScanId;v=1;d1=17668.17668.2	controllerType=0 controllerNumber=1 scan=17668	38.1312
21519:3	1	S.M[+15.995]PLPPHPGHPGYINFS[+79.966]YE.V		M[+16], S[+80]	716.986	3	2148.94	2148.92	0	8.7	17	Non	278.45	278.45	1.37	3.8	2376	>sp|P02817|AMELX_BOVIN Amelogenin, X isoform OS=Bos taurus OX=9913 GN=AMELX PE=1 SV=2	1	hf1_10472_ebo_34_1_261219.ScanId;v=1;d1=16898.16898.3	controllerType=0 controllerNumber=1 scan=16898	36.8235
22963:2	1	S.M[+15.995]PLPPHPGHPGYINFS[+79.966]YE.V		M[+16], S[+80]	1074.97	2	2148.93	2148.92	0	2.4	17	Non	289.12	289.12	9.33	4.73	2376	>sp|P02817|AMELX_BOVIN Amelogenin, X isoform OS=Bos taurus OX=9913 GN=AMELX PE=1 SV=2	1	hf1_10472_ebo_34_1_261219.ScanId;v=1;d1=17880.17880.2	controllerType=0 controllerNumber=1 scan=17880	38.4876
23190:3	1	S.M[+15.995]PLPPHPGHPGYINFS[+79.966]YE.V		M[+16], S[+80]	716.981	3	2148.93	2148.92	0	1.1	17	Non	311.72	311.72	6.67	4.06	2376	>sp|P02817|AMELX_BOVIN Amelogenin, X isoform OS=Bos taurus OX=9913 GN=AMELX PE=1 SV=2	1	hf1_10472_ebo_34_1_261219.ScanId;v=1;d1=18030.18030.3	controllerType=0 controllerNumber=1 scan=18030	38.74
21611:2	1	S.M[+15.995]PLPPHPGHPGYINFS[+79.966]YE.V		M[+16], S[+80]	1074.97	2	2148.93	2148.92	0	3.8	17	Non	344.93	344.93	26.84	5.36	2376	>sp|P02817|AMELX_BOVIN Amelogenin, X isoform OS=Bos taurus OX=9913 GN=AMELX PE=1 SV=2	1	hf1_10472_ebo_34_1_261219.ScanId;v=1;d1=16962.16962.2	controllerType=0 controllerNumber=1 scan=16962	36.933
22865:3	1	S.M[+15.995]PLPPHPGHPGYINFS[+79.966]YE.V		M[+16], S[+80]	716.982	3	2148.93	2148.92	0	3.3	17	Non	345.28	345.28	24.26	4.98	2376	>sp|P02817|AMELX_BOVIN Amelogenin, X isoform OS=Bos taurus OX=9913 GN=AMELX PE=1 SV=2	1	hf1_10472_ebo_34_1_261219.ScanId;v=1;d1=17814.17814.3	controllerType=0 controllerNumber=1 scan=17814	38.3789
22285:3	1	S.M[+15.995]PLPPHPGHPGYINFS[+79.966]YE.V		M[+16], S[+80]	716.984	3	2148.94	2148.92	0	5.1	17	Non	403.74	403.74	14.71	6.6	2376	>sp|P02817|AMELX_BOVIN Amelogenin, X isoform OS=Bos taurus OX=9913 GN=AMELX PE=1 SV=2	1	hf1_10472_ebo_34_1_261219.ScanId;v=1;d1=17416.17416.3	controllerType=0 controllerNumber=1 scan=17416	37.6995
22569:3	1	S.M[+15.995]PLPPHPGHPGYINFS[+79.966]YE.V		M[+16], S[+80]	716.982	3	2148.93	2148.92	0	3.5	17	Non	425.46	425.46	17.65	6.27	2376	>sp|P02817|AMELX_BOVIN Amelogenin, X isoform OS=Bos taurus OX=9913 GN=AMELX PE=1 SV=2	1	hf1_10472_ebo_34_1_261219.ScanId;v=1;d1=17615.17615.3	controllerType=0 controllerNumber=1 scan=17615	38.0406
21988:3	1	S.M[+15.995]PLPPHPGHPGYINFS[+79.966]YE.V		M[+16], S[+80]	716.984	3	2148.94	2148.92	0	5.6	17	Non	443.37	443.37	25.03	6.69	2376	>sp|P02817|AMELX_BOVIN Amelogenin, X isoform OS=Bos taurus OX=9913 GN=AMELX PE=1 SV=2	1	hf1_10472_ebo_34_1_261219.ScanId;v=1;d1=17212.17212.3	controllerType=0 controllerNumber=1 scan=17212	37.3574
21989:2	1	S.M[+15.995]PLPPHPGHPGYINFS[+79.966]YE.V		M[+16], S[+80]	1074.97	2	2148.94	2148.92	0	6.6	17	Non	543.96	543.96	23.03	7.31	2376	>sp|P02817|AMELX_BOVIN Amelogenin, X isoform OS=Bos taurus OX=9913 GN=AMELX PE=1 SV=2	1	hf1_10472_ebo_34_1_261219.ScanId;v=1;d1=17213.17213.2	controllerType=0 controllerNumber=1 scan=17213	37.3589
23364:2	1	S.M[+15.995]PLPPHPGHPGYIN[+0.984]FS[+79.966]YE.V		M[+16], N[+1], S[+80]	1075.47	2	2149.92	2149.91	0	7	17	Non	254.69	248.18	11.37	4.69	2376	>sp|P02817|AMELX_BOVIN Amelogenin, X isoform OS=Bos taurus OX=9913 GN=AMELX PE=1 SV=2	1	hf1_10472_ebo_34_1_261219.ScanId;v=1;d1=18143.18143.2	controllerType=0 controllerNumber=1 scan=18143	38.93
23191:3	1	S.M[+15.995]PLPPHPGHPGYIN[+0.984]FS[+79.966]YE.V		M[+16], N[+1], S[+80]	717.312	3	2149.92	2149.91	0	6.4	17	Non	313.58	313.58	21.35	4.66	2376	>sp|P02817|AMELX_BOVIN Amelogenin, X isoform OS=Bos taurus OX=9913 GN=AMELX PE=1 SV=2	1	hf1_10472_ebo_34_1_261219.ScanId;v=1;d1=18030.18030.3	controllerType=0 controllerNumber=1 scan=18030	38.74
27198:3	1	S.MPLPPHPGHPGYINFS[+79.966]YEV.L		S[+80]	744.675	3	2232.01	2232	0	5.4	17	Non	121.56	121.56	39.19	0.54	2376	>sp|P02817|AMELX_BOVIN Amelogenin, X isoform OS=Bos taurus OX=9913 GN=AMELX PE=1 SV=2	1	hf1_10472_ebo_34_1_261219.ScanId;v=1;d1=20707.20707.3	controllerType=0 controllerNumber=1 scan=20707	43.2426
30150:3	1	S.MPLPPHPGHPGYINFS[+79.966]YEVL.T		S[+80]	782.368	3	2345.09	2345.08	0	3.5	17	Non	285.77	285.77	116.52	4.44	2376	>sp|P02817|AMELX_BOVIN Amelogenin, X isoform OS=Bos taurus OX=9913 GN=AMELX PE=1 SV=2	1	hf1_10472_ebo_34_1_261219.ScanId;v=1;d1=22705.22705.3	controllerType=0 controllerNumber=1 scan=22705	46.6582
30768:3	1	S.MPLPPHPGHPGYINFS[+79.966]YEVL.T		S[+80]	782.369	3	2345.09	2345.08	0	4.8	17	Non	305.72	305.72	101.11	4.91	2376	>sp|P02817|AMELX_BOVIN Amelogenin, X isoform OS=Bos taurus OX=9913 GN=AMELX PE=1 SV=2	1	hf1_10472_ebo_34_1_261219.ScanId;v=1;d1=23108.23108.3	controllerType=0 controllerNumber=1 scan=23108	47.3607
30459:3	1	S.MPLPPHPGHPGYINFS[+79.966]YEVL.T		S[+80]	782.37	3	2345.1	2345.08	0	6	17	Non	378.19	378.19	129.25	6.45	2376	>sp|P02817|AMELX_BOVIN Amelogenin, X isoform OS=Bos taurus OX=9913 GN=AMELX PE=1 SV=2	1	hf1_10472_ebo_34_1_261219.ScanId;v=1;d1=22910.22910.3	controllerType=0 controllerNumber=1 scan=22910	47.0155
30205:2	1	S.MPLPPHPGHPGYINFS[+79.966]YEVL.T		S[+80]	1173.05	2	2345.09	2345.08	0	3.7	17	Non	382.58	213.6	203.18	5.09	2376	>sp|P02817|AMELX_BOVIN Amelogenin, X isoform OS=Bos taurus OX=9913 GN=AMELX PE=1 SV=2	1	hf1_10472_ebo_34_1_261219.ScanId;v=1;d1=22739.22739.2	controllerType=0 controllerNumber=1 scan=22739	46.7174
30512:2	1	S.MPLPPHPGHPGYINFS[+79.966]YEVL.T		S[+80]	1173.05	2	2345.1	2345.08	0	7.7	17	Non	479.46	479.46	260.42	7.27	2376	>sp|P02817|AMELX_BOVIN Amelogenin, X isoform OS=Bos taurus OX=9913 GN=AMELX PE=1 SV=2	1	hf1_10472_ebo_34_1_261219.ScanId;v=1;d1=22945.22945.2	controllerType=0 controllerNumber=1 scan=22945	47.0762
49972:3	1	S.MP[+15.995]LPPHPGHPGYINFS[+79.966]YEVL.T		P[+16], S[+80]	787.704	3	2361.1	2361.08	0	8.4	17	Non	132.68	132.68	7.3	0.56	2376	>sp|P02817|AMELX_BOVIN Amelogenin, X isoform OS=Bos taurus OX=9913 GN=AMELX PE=1 SV=2	1	hf1_10472_ebo_34_1_261219.ScanId;v=1;d1=36643.36643.4	controllerType=0 controllerNumber=1 scan=36643	73.4936
31256:3	1	S.MPLPPHPGHPGYIN[+0.984]FS[+79.966]YEVL.T		N[+1], S[+80]	782.698	3	2346.08	2346.07	0	5.4	17	Non	256.38	256.38	47.9	4.42	2376	>sp|P02817|AMELX_BOVIN Amelogenin, X isoform OS=Bos taurus OX=9913 GN=AMELX PE=1 SV=2	1	hf1_10472_ebo_34_1_261219.ScanId;v=1;d1=23420.23420.3	controllerType=0 controllerNumber=1 scan=23420	47.8931
30986:2	1	S.MPLPPHPGHPGYIN[+0.984]FS[+79.966]YEVL.T		N[+1], S[+80]	1173.55	2	2346.09	2346.07	0	7.9	17	Non	319.66	319.66	160.36	5.27	2376	>sp|P02817|AMELX_BOVIN Amelogenin, X isoform OS=Bos taurus OX=9913 GN=AMELX PE=1 SV=2	1	hf1_10472_ebo_34_1_261219.ScanId;v=1;d1=23247.23247.2	controllerType=0 controllerNumber=1 scan=23247	47.5984
28833:2	1	S.M[+15.995]PLPPHPGHPGYINFS[+79.966]YEVL.T		M[+16], S[+80]	1181.05	2	2361.09	2361.08	0	5.5	17	Non	450.9	450.9	6.17	7	2376	>sp|P02817|AMELX_BOVIN Amelogenin, X isoform OS=Bos taurus OX=9913 GN=AMELX PE=1 SV=2	1	hf1_10472_ebo_34_1_261219.ScanId;v=1;d1=21830.21830.2	controllerType=0 controllerNumber=1 scan=21830	45.1496
28535:2	1	S.M[+15.995]PLPPHPGHPGYINFS[+79.966]YEVL.T		M[+16], S[+80]	1181.05	2	2361.09	2361.08	0	7	17	Non	518.1	518.1	19.75	7.12	2376	>sp|P02817|AMELX_BOVIN Amelogenin, X isoform OS=Bos taurus OX=9913 GN=AMELX PE=1 SV=2	1	hf1_10472_ebo_34_1_261219.ScanId;v=1;d1=21625.21625.2	controllerType=0 controllerNumber=1 scan=21625	44.799
28224:2	1	S.M[+15.995]PLPPHPGHPGYINFS[+79.966]YEVL.T		M[+16], S[+80]	1181.05	2	2361.1	2361.08	0	8.5	17	Non	525.77	525.77	17.05	6.49	2376	>sp|P02817|AMELX_BOVIN Amelogenin, X isoform OS=Bos taurus OX=9913 GN=AMELX PE=1 SV=2	1	hf1_10472_ebo_34_1_261219.ScanId;v=1;d1=21421.21421.2	controllerType=0 controllerNumber=1 scan=21421	44.4545
13129:3	1	S.M[+15.995]PLPPHPGHPGYIN[+0.984]FSY[+31.990]EVL.T		M[+16], N[+1], Y[+32]	772.038	3	2314.1	2314.08	0	6.5	17	Non	103.3	103.3	4.11	1.13	2376	>sp|P02817|AMELX_BOVIN Amelogenin, X isoform OS=Bos taurus OX=9913 GN=AMELX PE=1 SV=2	1	hf1_10472_ebo_34_1_261219.ScanId;v=1;d1=11100.11100.2	controllerType=0 controllerNumber=1 scan=11100	27.018
29479:3	1	S.MP[+15.995]LPPHPGHPGYIN[+0.984]FS[+79.966]YEVL.T		N[+1], P[+16], S[+80]	788.029	3	2362.07	2362.06	0	4.2	17	Non	189.37	189.37	16.01	2.4	2376	>sp|P02817|AMELX_BOVIN Amelogenin, X isoform OS=Bos taurus OX=9913 GN=AMELX PE=1 SV=2	1	hf1_10472_ebo_34_1_261219.ScanId;v=1;d1=22262.22262.6	controllerType=0 controllerNumber=1 scan=22262	45.8887
29458:2	1	S.M[+15.995]PLPPHPGHPGYIN[+0.984]FS[+79.966]YEVL.T		M[+16], N[+1], S[+80]	1181.54	2	2362.08	2362.06	0	5.9	17	Non	266.92	266.92	3.43	4.8	2376	>sp|P02817|AMELX_BOVIN Amelogenin, X isoform OS=Bos taurus OX=9913 GN=AMELX PE=1 SV=2	1	hf1_10472_ebo_34_1_261219.ScanId;v=1;d1=22248.22248.2	controllerType=0 controllerNumber=1 scan=22248	45.8665
29130:3	1	S.MP[+15.995]LPPHPGHPGYIN[+0.984]FS[+79.966]YEVL.T		N[+1], P[+16], S[+80]	788.03	3	2362.08	2362.06	0	6.6	17	Non	287.16	287.16	7.3	4.83	2376	>sp|P02817|AMELX_BOVIN Amelogenin, X isoform OS=Bos taurus OX=9913 GN=AMELX PE=1 SV=2	1	hf1_10472_ebo_34_1_261219.ScanId;v=1;d1=22032.22032.6	controllerType=0 controllerNumber=1 scan=22032	45.4932
29146:2	1	S.M[+15.995]PLPPHPGHPGYIN[+0.984]FS[+79.966]YEVL.T		M[+16], N[+1], S[+80]	1181.54	2	2362.08	2362.06	0	7.9	17	Non	413.57	413.57	7.22	6.97	2376	>sp|P02817|AMELX_BOVIN Amelogenin, X isoform OS=Bos taurus OX=9913 GN=AMELX PE=1 SV=2	1	hf1_10472_ebo_34_1_261219.ScanId;v=1;d1=22042.22042.2	controllerType=0 controllerNumber=1 scan=22042	45.5108
22064:3	1	S.MPLPPHPGHPGYINFSY[+31.990]EVLT.P		Y[+32]	800.057	3	2398.15	2398.15	0	0.5	17	Non	100.76	88.82	12.99	0.33	2376	>sp|P02817|AMELX_BOVIN Amelogenin, X isoform OS=Bos taurus OX=9913 GN=AMELX PE=1 SV=2	1	hf1_10472_ebo_34_1_261219.ScanId;v=1;d1=17263.17263.3	controllerType=0 controllerNumber=1 scan=17263	37.4374
29177:3	1	S.MPLPPHPGHPGYINFS[+79.966]YEVLT.P		S[+80]	816.054	3	2446.15	2446.13	0	7.7	17	Non	111.58	83.32	50.7	0.56	2376	>sp|P02817|AMELX_BOVIN Amelogenin, X isoform OS=Bos taurus OX=9913 GN=AMELX PE=1 SV=2	1	hf1_10472_ebo_34_1_261219.ScanId;v=1;d1=22063.22063.3	controllerType=0 controllerNumber=1 scan=22063	45.5472
27213:3	1	S.MP[+15.995]LPPHPGHPGYINFS[+79.966]YEVLT.P		P[+16], S[+80]	821.383	3	2462.13	2462.12	0	3.8	17	Non	60.35	60.35	4.02	0.48	2376	>sp|P02817|AMELX_BOVIN Amelogenin, X isoform OS=Bos taurus OX=9913 GN=AMELX PE=1 SV=2	1	hf1_10472_ebo_34_1_261219.ScanId;v=1;d1=20716.20716.3	controllerType=0 controllerNumber=1 scan=20716	43.258
20254:2	1	S.M[+15.995]PLP[+31.990]PHPGHPGYINFS[+79.966]YEVLT.P		M[+16], P[+32], S[+80]	1247.57	2	2494.13	2494.11	0	5.2	17	Non	58.48	58.31	0	0.68	2376	>sp|P02817|AMELX_BOVIN Amelogenin, X isoform OS=Bos taurus OX=9913 GN=AMELX PE=1 SV=2	1	hf1_10472_ebo_34_1_261219.ScanId;v=1;d1=16012.16012.2	controllerType=0 controllerNumber=1 scan=16012	35.3065
20190:2	1	S.M[+15.995]PLP[+31.990]PHPGHPGYINFS[+79.966]YEVLT.P		M[+16], P[+32], S[+80]	1247.57	2	2494.13	2494.11	0	4.9	17	Non	144.09	144.09	0	0.73	2376	>sp|P02817|AMELX_BOVIN Amelogenin, X isoform OS=Bos taurus OX=9913 GN=AMELX PE=1 SV=2	1	hf1_10472_ebo_34_1_261219.ScanId;v=1;d1=15969.15969.2	controllerType=0 controllerNumber=1 scan=15969	35.2328
30136:2	1	S.MPLPPHPGHPGYINFS[+79.966]YEVLTP.L		S[+80]	1272.1	2	2543.19	2543.18	0	4	17	Non	263.2	263.2	63.5	4.77	2376	>sp|P02817|AMELX_BOVIN Amelogenin, X isoform OS=Bos taurus OX=9913 GN=AMELX PE=1 SV=2	1	hf1_10472_ebo_34_1_261219.ScanId;v=1;d1=22696.22696.2	controllerType=0 controllerNumber=1 scan=22696	46.6422
30594:3	1	S.MPLPPHPGHPGYINFS[+79.966]YEVLTP.L		S[+80]	848.405	3	2543.2	2543.18	0	6.5	17	Non	308.52	308.52	81.03	4.96	2376	>sp|P02817|AMELX_BOVIN Amelogenin, X isoform OS=Bos taurus OX=9913 GN=AMELX PE=1 SV=2	1	hf1_10472_ebo_34_1_261219.ScanId;v=1;d1=22999.22999.3	controllerType=0 controllerNumber=1 scan=22999	47.1711
29993:3	1	S.MPLPPHPGHPGYINFS[+79.966]YEVLTP.L		S[+80]	848.404	3	2543.2	2543.18	0	5.2	17	Non	320.22	320.22	68.73	4.68	2376	>sp|P02817|AMELX_BOVIN Amelogenin, X isoform OS=Bos taurus OX=9913 GN=AMELX PE=1 SV=2	1	hf1_10472_ebo_34_1_261219.ScanId;v=1;d1=22600.22600.3	controllerType=0 controllerNumber=1 scan=22600	46.4762
26901:3	1	S.MP[+15.995]LPPHPGHPGYINFSYEVLTP.L		P[+16]	827.08	3	2479.23	2479.21	0	5.5	17	Non	324.26	279.21	5.8	4.7	2376	>sp|P02817|AMELX_BOVIN Amelogenin, X isoform OS=Bos taurus OX=9913 GN=AMELX PE=1 SV=2	1	hf1_10472_ebo_34_1_261219.ScanId;v=1;d1=20502.20502.3	controllerType=0 controllerNumber=1 scan=20502	42.9007
30297:3	1	S.MPLPPHPGHPGYINFS[+79.966]YEVLTP.L		S[+80]	848.403	3	2543.19	2543.18	0	4.7	17	Non	346.56	346.56	108.81	5.5	2376	>sp|P02817|AMELX_BOVIN Amelogenin, X isoform OS=Bos taurus OX=9913 GN=AMELX PE=1 SV=2	1	hf1_10472_ebo_34_1_261219.ScanId;v=1;d1=22801.22801.3	controllerType=0 controllerNumber=1 scan=22801	46.8248
36753:2	1	S.MPLPPHPGHPGYIN[+0.984]FS[+79.966]YEVLTP.L		N[+1], S[+80]	1272.6	2	2544.19	2544.17	0	8.5	17	Non	130.59	130.59	28.02	0.75	2376	>sp|P02817|AMELX_BOVIN Amelogenin, X isoform OS=Bos taurus OX=9913 GN=AMELX PE=1 SV=2	1	hf1_10472_ebo_34_1_261219.ScanId;v=1;d1=27119.27119.2	controllerType=0 controllerNumber=1 scan=27119	54.3764
20362:4	1	S.MPLPPHPGHPGYINF[+15.995]S[+79.966]YEVLTP.L		F[+16], S[+80]	640.553	4	2559.19	2559.18	0	5.4	17	Non	182.79	182.79	8.89	2.51	2376	>sp|P02817|AMELX_BOVIN Amelogenin, X isoform OS=Bos taurus OX=9913 GN=AMELX PE=1 SV=2	1	hf1_10472_ebo_34_1_261219.ScanId;v=1;d1=16087.16087.3	controllerType=0 controllerNumber=1 scan=16087	35.4347
30908:3	1	S.MPLPPHPGHPGYIN[+0.984]FS[+79.966]YEVLTP.L		N[+1], S[+80]	848.732	3	2544.18	2544.17	0	5.2	17	Non	284.69	284.69	117.63	4.62	2376	>sp|P02817|AMELX_BOVIN Amelogenin, X isoform OS=Bos taurus OX=9913 GN=AMELX PE=1 SV=2	1	hf1_10472_ebo_34_1_261219.ScanId;v=1;d1=23197.23197.3	controllerType=0 controllerNumber=1 scan=23197	47.5129
29229:3	1	S.MP[+15.995]LPPHPGHPGYIN[+0.984]FS[+79.966]YEVLTP.L		N[+1], P[+16], S[+80]	854.064	3	2560.18	2560.16	0	5.7	17	Non	301.61	276.1	10.01	4.62	2376	>sp|P02817|AMELX_BOVIN Amelogenin, X isoform OS=Bos taurus OX=9913 GN=AMELX PE=1 SV=2	1	hf1_10472_ebo_34_1_261219.ScanId;v=1;d1=22096.22096.3	controllerType=0 controllerNumber=1 scan=22096	45.6045
33949:4	1	S.MPLPPHPGHPGYINFS[+79.966]YEVLTPL.K		S[+80]	664.824	4	2656.27	2656.27	0	3	17	Non	120.36	120.36	21.16	0.56	2376	>sp|P02817|AMELX_BOVIN Amelogenin, X isoform OS=Bos taurus OX=9913 GN=AMELX PE=1 SV=2	1	hf1_10472_ebo_34_1_261219.ScanId;v=1;d1=25246.25246.4	controllerType=0 controllerNumber=1 scan=25246	51.061
33354:4	1	S.MPLPPHPGHPGYINFS[+79.966]YEVLTPL.K		S[+80]	664.826	4	2656.28	2656.27	0	5	17	Non	165.34	165.34	47.6	2.39	2376	>sp|P02817|AMELX_BOVIN Amelogenin, X isoform OS=Bos taurus OX=9913 GN=AMELX PE=1 SV=2	1	hf1_10472_ebo_34_1_261219.ScanId;v=1;d1=24842.24842.4	controllerType=0 controllerNumber=1 scan=24842	50.3493
35011:3	1	S.MPLPPHPGHPGYINFS[+79.966]YEVLTPL.K		S[+80]	886.094	3	2656.27	2656.27	0	-0.3	17	Non	259.19	259.19	71.45	3.71	2376	>sp|P02817|AMELX_BOVIN Amelogenin, X isoform OS=Bos taurus OX=9913 GN=AMELX PE=1 SV=2	1	hf1_10472_ebo_34_1_261219.ScanId;v=1;d1=25938.25938.3	controllerType=0 controllerNumber=1 scan=25938	52.2872
33643:4	1	S.MPLPPHPGHPGYINFS[+79.966]YEVLTPL.K		S[+80]	664.826	4	2656.28	2656.27	0	4.9	17	Non	306.75	306.75	99.92	4.61	2376	>sp|P02817|AMELX_BOVIN Amelogenin, X isoform OS=Bos taurus OX=9913 GN=AMELX PE=1 SV=2	1	hf1_10472_ebo_34_1_261219.ScanId;v=1;d1=25039.25039.4	controllerType=0 controllerNumber=1 scan=25039	50.6956
33624:3	1	S.MPLPPHPGHPGYINFS[+79.966]YEVLTPL.K		S[+80]	886.098	3	2656.28	2656.27	0	5.2	17	Non	362.46	362.46	50.94	5.5	2376	>sp|P02817|AMELX_BOVIN Amelogenin, X isoform OS=Bos taurus OX=9913 GN=AMELX PE=1 SV=2	1	hf1_10472_ebo_34_1_261219.ScanId;v=1;d1=25026.25026.3	controllerType=0 controllerNumber=1 scan=25026	50.6742
33285:2	1	S.MPLPPHPGHPGYINFS[+79.966]YEVLTPL.K		S[+80]	1328.65	2	2656.29	2656.27	0	9.1	17	Non	371.25	371.25	111.91	6.01	2376	>sp|P02817|AMELX_BOVIN Amelogenin, X isoform OS=Bos taurus OX=9913 GN=AMELX PE=1 SV=2	1	hf1_10472_ebo_34_1_261219.ScanId;v=1;d1=24797.24797.2	controllerType=0 controllerNumber=1 scan=24797	50.2736
33922:3	1	S.MPLPPHPGHPGYINFS[+79.966]YEVLTPL.K		S[+80]	886.097	3	2656.28	2656.27	0	4	17	Non	380.01	380.01	120.48	6.32	2376	>sp|P02817|AMELX_BOVIN Amelogenin, X isoform OS=Bos taurus OX=9913 GN=AMELX PE=1 SV=2	1	hf1_10472_ebo_34_1_261219.ScanId;v=1;d1=25227.25227.3	controllerType=0 controllerNumber=1 scan=25227	51.0267
33330:3	1	S.MPLPPHPGHPGYINFS[+79.966]YEVLTPL.K		S[+80]	886.099	3	2656.28	2656.27	0	5.9	17	Non	420.23	420.23	103.21	6.62	2376	>sp|P02817|AMELX_BOVIN Amelogenin, X isoform OS=Bos taurus OX=9913 GN=AMELX PE=1 SV=2	1	hf1_10472_ebo_34_1_261219.ScanId;v=1;d1=24827.24827.3	controllerType=0 controllerNumber=1 scan=24827	50.3254
33881:2	1	S.MPLPPHPGHPGYINFS[+79.966]YEVLTPL.K		S[+80]	1328.65	2	2656.29	2656.27	0	8.9	17	Non	426.42	426.42	136.86	6.19	2376	>sp|P02817|AMELX_BOVIN Amelogenin, X isoform OS=Bos taurus OX=9913 GN=AMELX PE=1 SV=2	1	hf1_10472_ebo_34_1_261219.ScanId;v=1;d1=25197.25197.2	controllerType=0 controllerNumber=1 scan=25197	50.9754
29957:3	1	S.MP[+15.995]LPPHPGHPGYINFSYEVLTPL.K		P[+16]	864.775	3	2592.31	2592.3	0	6	17	Non	433	358.61	5.8	5.68	2376	>sp|P02817|AMELX_BOVIN Amelogenin, X isoform OS=Bos taurus OX=9913 GN=AMELX PE=1 SV=2	1	hf1_10472_ebo_34_1_261219.ScanId;v=1;d1=22573.22573.3	controllerType=0 controllerNumber=1 scan=22573	46.43
33579:2	1	S.MPLPPHPGHPGYINFS[+79.966]YEVLTPL.K		S[+80]	1328.65	2	2656.29	2656.27	0	7	17	Non	462.82	462.82	153.03	7.27	2376	>sp|P02817|AMELX_BOVIN Amelogenin, X isoform OS=Bos taurus OX=9913 GN=AMELX PE=1 SV=2	1	hf1_10472_ebo_34_1_261219.ScanId;v=1;d1=24994.24994.2	controllerType=0 controllerNumber=1 scan=24994	50.6191
45745:3	1	S.MP[+15.995]LPPHPGHPGYINFS[+79.966]YEVLTPL.K		P[+16], S[+80]	891.43	3	2672.28	2672.26	0	5.6	17	Non	45.13	45.13	0.71	2.09	2376	>sp|P02817|AMELX_BOVIN Amelogenin, X isoform OS=Bos taurus OX=9913 GN=AMELX PE=1 SV=2	1	hf1_10472_ebo_34_1_261219.ScanId;v=1;d1=32931.32931.3	controllerType=0 controllerNumber=1 scan=32931	64.7409
50196:3	1	S.MP[+15.995]LPPHPGHPGYINFS[+79.966]YEVLTPL.K		P[+16], S[+80]	891.432	3	2672.28	2672.26	0	6.7	17	Non	61.08	61.08	4	2.31	2376	>sp|P02817|AMELX_BOVIN Amelogenin, X isoform OS=Bos taurus OX=9913 GN=AMELX PE=1 SV=2	1	hf1_10472_ebo_34_1_261219.ScanId;v=1;d1=36855.36855.3	controllerType=0 controllerNumber=1 scan=36855	74.1402
38469:3	1	S.MP[+15.995]LPPHPGHPGYINFS[+79.966]YEVLTPL.K		P[+16], S[+80]	891.428	3	2672.27	2672.26	0	2.8	17	Non	108.11	108.11	1.46	0.54	2376	>sp|P02817|AMELX_BOVIN Amelogenin, X isoform OS=Bos taurus OX=9913 GN=AMELX PE=1 SV=2	1	hf1_10472_ebo_34_1_261219.ScanId;v=1;d1=28246.28246.6	controllerType=0 controllerNumber=1 scan=28246	56.399
28575:3	1	S.MPLPPHP[+31.990]GHPGYINFS[+79.966]YEVLTPL.K		P[+32], S[+80]	896.759	3	2688.26	2688.26	0	1.6	17	Non	111.37	111.37	23.78	0.38	2376	>sp|P02817|AMELX_BOVIN Amelogenin, X isoform OS=Bos taurus OX=9913 GN=AMELX PE=1 SV=2	1	hf1_10472_ebo_34_1_261219.ScanId;v=1;d1=21654.21654.3	controllerType=0 controllerNumber=1 scan=21654	44.8488
33784:3	1	S.MP[+15.995]LPPHPGHPGYINFS[+79.966]YEVLTPL.K		P[+16], S[+80]	891.423	3	2672.25	2672.26	0	-3.3	17	Non	247.8	247.8	5.8	2.85	2376	>sp|P02817|AMELX_BOVIN Amelogenin, X isoform OS=Bos taurus OX=9913 GN=AMELX PE=1 SV=2	1	hf1_10472_ebo_34_1_261219.ScanId;v=1;d1=25132.25132.3	controllerType=0 controllerNumber=1 scan=25132	50.8605
31489:4	1	S.MP[+15.995]LPPHPGHPGYINFS[+79.966]YEVLTPL.K		P[+16], S[+80]	668.823	4	2672.27	2672.26	0	3.4	17	Non	264.32	264.32	5.8	3.6	2376	>sp|P02817|AMELX_BOVIN Amelogenin, X isoform OS=Bos taurus OX=9913 GN=AMELX PE=1 SV=2	1	hf1_10472_ebo_34_1_261219.ScanId;v=1;d1=23575.23575.4	controllerType=0 controllerNumber=1 scan=23575	48.1576
32902:3	1	S.MP[+15.995]LPPHPGHPGYINFS[+79.966]YEVLTPL.K		P[+16], S[+80]	891.425	3	2672.26	2672.26	0	-0.7	17	Non	266.49	266.49	5.8	3.71	2376	>sp|P02817|AMELX_BOVIN Amelogenin, X isoform OS=Bos taurus OX=9913 GN=AMELX PE=1 SV=2	1	hf1_10472_ebo_34_1_261219.ScanId;v=1;d1=24533.24533.3	controllerType=0 controllerNumber=1 scan=24533	49.8116
34508:2	1	S.MPLPPHPGHPGYIN[+0.984]FS[+79.966]YEVLTPL.K		N[+1], S[+80]	1329.14	2	2657.28	2657.25	0	9.1	17	Non	279.98	279.98	77.48	4.19	2376	>sp|P02817|AMELX_BOVIN Amelogenin, X isoform OS=Bos taurus OX=9913 GN=AMELX PE=1 SV=2	1	hf1_10472_ebo_34_1_261219.ScanId;v=1;d1=25619.25619.2	controllerType=0 controllerNumber=1 scan=25619	51.7216
32027:3	1	S.MP[+15.995]LPPHPGHPGYINFS[+79.966]YEVLTPL.K		P[+16], S[+80]	891.43	3	2672.28	2672.26	0	4.9	17	Non	291.24	291.24	4	5.26	2376	>sp|P02817|AMELX_BOVIN Amelogenin, X isoform OS=Bos taurus OX=9913 GN=AMELX PE=1 SV=2	1	hf1_10472_ebo_34_1_261219.ScanId;v=1;d1=23933.23933.3	controllerType=0 controllerNumber=1 scan=23933	48.7768
32609:3	1	S.MP[+15.995]LPPHPGHPGYINFS[+79.966]YEVLTPL.K		P[+16], S[+80]	891.424	3	2672.26	2672.26	0	-1.9	17	Non	316.15	316.15	5.8	3.97	2376	>sp|P02817|AMELX_BOVIN Amelogenin, X isoform OS=Bos taurus OX=9913 GN=AMELX PE=1 SV=2	1	hf1_10472_ebo_34_1_261219.ScanId;v=1;d1=24325.24325.3	controllerType=0 controllerNumber=1 scan=24325	49.4535
31729:3	1	S.MP[+15.995]LPPHPGHPGYINFS[+79.966]YEVLTPL.K		P[+16], S[+80]	891.429	3	2672.27	2672.26	0	4.6	17	Non	316.41	316.41	4	5	2376	>sp|P02817|AMELX_BOVIN Amelogenin, X isoform OS=Bos taurus OX=9913 GN=AMELX PE=1 SV=2	1	hf1_10472_ebo_34_1_261219.ScanId;v=1;d1=23735.23735.3	controllerType=0 controllerNumber=1 scan=23735	48.4357
34361:3	1	S.MPLPPHPGHPGYIN[+0.984]FS[+79.966]YEVLTPL.K		N[+1], S[+80]	886.427	3	2657.27	2657.25	0	5.8	17	Non	355.72	355.72	86.01	5.5	2376	>sp|P02817|AMELX_BOVIN Amelogenin, X isoform OS=Bos taurus OX=9913 GN=AMELX PE=1 SV=2	1	hf1_10472_ebo_34_1_261219.ScanId;v=1;d1=25521.25521.3	controllerType=0 controllerNumber=1 scan=25521	51.5498
32065:2	1	S.M[+15.995]PLPPHPGHPGYINFS[+79.966]YEVLTPL.K		M[+16], S[+80]	1336.64	2	2672.28	2672.26	0	6.4	17	Non	370.27	370.27	14.52	6.48	2376	>sp|P02817|AMELX_BOVIN Amelogenin, X isoform OS=Bos taurus OX=9913 GN=AMELX PE=1 SV=2	1	hf1_10472_ebo_34_1_261219.ScanId;v=1;d1=23957.23957.2	controllerType=0 controllerNumber=1 scan=23957	48.8181
33184:3	1	S.MP[+15.995]LPPHPGHPGYINFS[+79.966]YEVLTPL.K		P[+16], S[+80]	891.429	3	2672.27	2672.26	0	4	17	Non	380.72	380.72	5.8	5.92	2376	>sp|P02817|AMELX_BOVIN Amelogenin, X isoform OS=Bos taurus OX=9913 GN=AMELX PE=1 SV=2	1	hf1_10472_ebo_34_1_261219.ScanId;v=1;d1=24731.24731.6	controllerType=0 controllerNumber=1 scan=24731	50.1598
31465:2	1	S.M[+15.995]PLPPHPGHPGYINFS[+79.966]YEVLTPL.K		M[+16], S[+80]	1336.64	2	2672.28	2672.26	0	6.5	17	Non	385.65	385.65	13.62	6.57	2376	>sp|P02817|AMELX_BOVIN Amelogenin, X isoform OS=Bos taurus OX=9913 GN=AMELX PE=1 SV=2	1	hf1_10472_ebo_34_1_261219.ScanId;v=1;d1=23557.23557.2	controllerType=0 controllerNumber=1 scan=23557	48.1267
34673:3	1	S.MPLPPHPGHPGYIN[+0.984]FS[+79.966]YEVLTPL.K		N[+1], S[+80]	886.427	3	2657.27	2657.25	0	6.3	17	Non	406.65	406.65	134.69	6.48	2376	>sp|P02817|AMELX_BOVIN Amelogenin, X isoform OS=Bos taurus OX=9913 GN=AMELX PE=1 SV=2	1	hf1_10472_ebo_34_1_261219.ScanId;v=1;d1=25723.25723.3	controllerType=0 controllerNumber=1 scan=25723	51.9023
31427:3	1	S.MP[+15.995]LPPHPGHPGYINFS[+79.966]YEVLTPL.K		P[+16], S[+80]	891.429	3	2672.27	2672.26	0	3.5	17	Non	413.1	413.1	5.8	6.35	2376	>sp|P02817|AMELX_BOVIN Amelogenin, X isoform OS=Bos taurus OX=9913 GN=AMELX PE=1 SV=2	1	hf1_10472_ebo_34_1_261219.ScanId;v=1;d1=23531.23531.3	controllerType=0 controllerNumber=1 scan=23531	48.0838
31762:2	1	S.M[+15.995]PLPPHPGHPGYINFS[+79.966]YEVLTPL.K		M[+16], S[+80]	1336.64	2	2672.28	2672.26	0	5.7	17	Non	439.66	439.66	17.06	6.95	2376	>sp|P02817|AMELX_BOVIN Amelogenin, X isoform OS=Bos taurus OX=9913 GN=AMELX PE=1 SV=2	1	hf1_10472_ebo_34_1_261219.ScanId;v=1;d1=23758.23758.2	controllerType=0 controllerNumber=1 scan=23758	48.4744
49988:3	1	S.MP[+15.995]LPPHPGHPGYINFS[+79.966]Y[+15.995]EVLTPL.K		P[+16], S[+80], Y[+16]	896.764	3	2688.28	2688.26	0	8	17	Non	37.84	37.84	0	0.54	2376	>sp|P02817|AMELX_BOVIN Amelogenin, X isoform OS=Bos taurus OX=9913 GN=AMELX PE=1 SV=2	1	hf1_10472_ebo_34_1_261219.ScanId;v=1;d1=36653.36653.3	controllerType=0 controllerNumber=1 scan=36653	73.5115
50109:3	1	S.MP[+15.995]LPPHPGHP[+15.995]GYINFS[+79.966]YEVLTPL.K		P[+16]*2, S[+80]	896.762	3	2688.27	2688.26	0	5.9	17	Non	87.78	87.78	0	1.1	2376	>sp|P02817|AMELX_BOVIN Amelogenin, X isoform OS=Bos taurus OX=9913 GN=AMELX PE=1 SV=2	1	hf1_10472_ebo_34_1_261219.ScanId;v=1;d1=36790.36790.3	controllerType=0 controllerNumber=1 scan=36790	73.9674
19770:3	1	S.M[+15.995]PLPPHPGHPGYINFSY[+31.990]EVLTP[+15.995]L.K		M[+16], P[+16], Y[+32]	880.766	3	2640.28	2640.28	0	1	17	Non	97.02	97.02	11.64	0.68	2376	>sp|P02817|AMELX_BOVIN Amelogenin, X isoform OS=Bos taurus OX=9913 GN=AMELX PE=1 SV=2	1	hf1_10472_ebo_34_1_261219.ScanId;v=1;d1=15665.15665.3	controllerType=0 controllerNumber=1 scan=15665	34.718
50284:3	1	S.MP[+15.995]LPPHPGHP[+15.995]GYINFS[+79.966]YEVLTPL.K		P[+16]*2, S[+80]	896.761	3	2688.27	2688.26	0	4.8	17	Non	138.89	138.89	1.62	2.32	2376	>sp|P02817|AMELX_BOVIN Amelogenin, X isoform OS=Bos taurus OX=9913 GN=AMELX PE=1 SV=2	1	hf1_10472_ebo_34_1_261219.ScanId;v=1;d1=36932.36932.3	controllerType=0 controllerNumber=1 scan=36932	74.3645
29912:3	1	S.MPLPPHPGHPGYIN[+0.984]FS[+79.966]Y[+31.990]EVLTPL.K		N[+1], S[+80], Y[+32]	897.09	3	2689.26	2689.24	0	5.3	17	Non	146.28	146.28	17.28	1.18	2376	>sp|P02817|AMELX_BOVIN Amelogenin, X isoform OS=Bos taurus OX=9913 GN=AMELX PE=1 SV=2	1	hf1_10472_ebo_34_1_261219.ScanId;v=1;d1=22544.22544.3	controllerType=0 controllerNumber=1 scan=22544	46.3784
28845:3	1	S.MP[+15.995]LPPHPGHPGYINFS[+79.966]Y[+15.995]EVLTPL.K		P[+16], S[+80], Y[+16]	896.762	3	2688.27	2688.26	0	5.5	17	Non	151.26	151.26	4.95	2.36	2376	>sp|P02817|AMELX_BOVIN Amelogenin, X isoform OS=Bos taurus OX=9913 GN=AMELX PE=1 SV=2	1	hf1_10472_ebo_34_1_261219.ScanId;v=1;d1=21837.21837.3	controllerType=0 controllerNumber=1 scan=21837	45.1599
30952:3	1	S.MP[+15.995]LPPHPGHPGYINFS[+79.966]Y[+15.995]EVLTPL.K		P[+16], S[+80], Y[+16]	896.761	3	2688.27	2688.26	0	4.5	17	Non	169.35	82.8	0.13	0.54	2376	>sp|P02817|AMELX_BOVIN Amelogenin, X isoform OS=Bos taurus OX=9913 GN=AMELX PE=1 SV=2	1	hf1_10472_ebo_34_1_261219.ScanId;v=1;d1=23225.23225.3	controllerType=0 controllerNumber=1 scan=23225	47.5598
32534:3	1	S.MP[+15.995]LPPHPGHPGYIN[+0.984]FS[+79.966]YEVLTPL.K		N[+1], P[+16], S[+80]	891.758	3	2673.26	2673.25	0	4.7	17	Non	174.69	41.85	4.79	1	2376	>sp|P02817|AMELX_BOVIN Amelogenin, X isoform OS=Bos taurus OX=9913 GN=AMELX PE=1 SV=2	1	hf1_10472_ebo_34_1_261219.ScanId;v=1;d1=24269.24269.6	controllerType=0 controllerNumber=1 scan=24269	49.3519
31666:3	1	S.MP[+15.995]LPPHPGHP[+15.995]GYINFS[+79.966]YEVLTPL.K		P[+16]*2, S[+80]	896.759	3	2688.26	2688.26	0	2.1	17	Non	186.48	186.48	5.8	2.32	2376	>sp|P02817|AMELX_BOVIN Amelogenin, X isoform OS=Bos taurus OX=9913 GN=AMELX PE=1 SV=2	1	hf1_10472_ebo_34_1_261219.ScanId;v=1;d1=23696.23696.6	controllerType=0 controllerNumber=1 scan=23696	48.3667
29823:3	1	S.MP[+15.995]LPPHPGHPGYINF[+15.995]S[+79.966]YEVLTPL.K		F[+16], P[+16], S[+80]	896.763	3	2688.27	2688.26	0	6.3	17	Non	193.92	193.92	4.61	2.46	2376	>sp|P02817|AMELX_BOVIN Amelogenin, X isoform OS=Bos taurus OX=9913 GN=AMELX PE=1 SV=2	1	hf1_10472_ebo_34_1_261219.ScanId;v=1;d1=22484.22484.3	controllerType=0 controllerNumber=1 scan=22484	46.276
31519:3	1	S.MP[+15.995]LPPHP[+15.995]GHPGYINFS[+79.966]YEVLTPL.K		P[+16]*2, S[+80]	896.759	3	2688.26	2688.26	0	2.1	17	Non	232.07	232.07	5.8	2.35	2376	>sp|P02817|AMELX_BOVIN Amelogenin, X isoform OS=Bos taurus OX=9913 GN=AMELX PE=1 SV=2	1	hf1_10472_ebo_34_1_261219.ScanId;v=1;d1=23596.23596.3	controllerType=0 controllerNumber=1 scan=23596	48.1944
33721:3	1	S.MPLPPHPGH[+15.995]PGYIN[+0.984]FS[+79.966]YEVLTPL.K		H[+16], N[+1], S[+80]	891.758	3	2673.26	2673.25	0	5.1	17	Non	232.75	232.75	3.41	3.11	2376	>sp|P02817|AMELX_BOVIN Amelogenin, X isoform OS=Bos taurus OX=9913 GN=AMELX PE=1 SV=2	1	hf1_10472_ebo_34_1_261219.ScanId;v=1;d1=25089.25089.4	controllerType=0 controllerNumber=1 scan=25089	50.7832
32903:3	1	S.MP[+15.995]LPPHPGHPGYIN[+0.984]FS[+79.966]YEVLTPL.K		N[+1], P[+16], S[+80]	891.758	3	2673.26	2673.25	0	5.3	17	Non	258.73	255.46	5.8	4.42	2376	>sp|P02817|AMELX_BOVIN Amelogenin, X isoform OS=Bos taurus OX=9913 GN=AMELX PE=1 SV=2	1	hf1_10472_ebo_34_1_261219.ScanId;v=1;d1=24533.24533.3	controllerType=0 controllerNumber=1 scan=24533	49.8116
31157:2	1	S.M[+15.995]PLPPHPGHPGY[+15.995]INFS[+79.966]YEVLTPL.K		M[+16], S[+80], Y[+16]	1344.64	2	2688.27	2688.26	0	4.8	17	Non	295.01	295.01	1.24	5.14	2376	>sp|P02817|AMELX_BOVIN Amelogenin, X isoform OS=Bos taurus OX=9913 GN=AMELX PE=1 SV=2	1	hf1_10472_ebo_34_1_261219.ScanId;v=1;d1=23357.23357.2	controllerType=0 controllerNumber=1 scan=23357	47.7852
32610:3	1	S.MP[+15.995]LPPHPGHPGYIN[+0.984]FS[+79.966]YEVLTPL.K		N[+1], P[+16], S[+80]	891.758	3	2673.26	2673.25	0	4.8	17	Non	315.06	315.06	5.8	5.18	2376	>sp|P02817|AMELX_BOVIN Amelogenin, X isoform OS=Bos taurus OX=9913 GN=AMELX PE=1 SV=2	1	hf1_10472_ebo_34_1_261219.ScanId;v=1;d1=24325.24325.3	controllerType=0 controllerNumber=1 scan=24325	49.4535
32673:2	1	S.M[+15.995]PLPPHPGHPGYIN[+0.984]FS[+79.966]YEVLTPL.K		M[+16], N[+1], S[+80]	1337.14	2	2673.27	2673.25	0	8	17	Non	335.83	214.58	5.95	5.11	2376	>sp|P02817|AMELX_BOVIN Amelogenin, X isoform OS=Bos taurus OX=9913 GN=AMELX PE=1 SV=2	1	hf1_10472_ebo_34_1_261219.ScanId;v=1;d1=24370.24370.2	controllerType=0 controllerNumber=1 scan=24370	49.5297
32378:2	1	S.M[+15.995]PLPPHPGHPGYIN[+0.984]FS[+79.966]YEVLTPL.K		M[+16], N[+1], S[+80]	1337.14	2	2673.27	2673.25	0	7.7	17	Non	368.43	239.59	5.92	5.5	2376	>sp|P02817|AMELX_BOVIN Amelogenin, X isoform OS=Bos taurus OX=9913 GN=AMELX PE=1 SV=2	1	hf1_10472_ebo_34_1_261219.ScanId;v=1;d1=24167.24167.2	controllerType=0 controllerNumber=1 scan=24167	49.1772
32324:3	1	S.MP[+15.995]LPPHPGHPGYIN[+0.984]FS[+79.966]YEVLTPL.K		N[+1], P[+16], S[+80]	891.758	3	2673.26	2673.25	0	5	17	Non	387.25	373.64	5.8	6.48	2376	>sp|P02817|AMELX_BOVIN Amelogenin, X isoform OS=Bos taurus OX=9913 GN=AMELX PE=1 SV=2	1	hf1_10472_ebo_34_1_261219.ScanId;v=1;d1=24131.24131.3	controllerType=0 controllerNumber=1 scan=24131	49.1156
48979:3	1	S.MP[+15.995]LPPHPGHP[+31.990]GY[+31.990]INFSY[+15.995]EVLTPL.K		P[+16][+32], Y[+16][+32]	891.429	3	2672.27	2672.27	0	1.5	17	Non	6.44	6.44	0	0.8	2376	>sp|P02817|AMELX_BOVIN Amelogenin, X isoform OS=Bos taurus OX=9913 GN=AMELX PE=1 SV=2	1	hf1_10472_ebo_34_1_261219.ScanId;v=1;d1=35753.35753.3	controllerType=0 controllerNumber=1 scan=35753	71.3503
46451:3	1	S.MP[+15.995]LPPHPGHP[+31.990]GY[+31.990]INFSY[+15.995]EVLTPL.K		P[+16][+32], Y[+16][+32]	891.427	3	2672.27	2672.27	0	-1.8	17	Non	21.79	21.79	0	0.68	2376	>sp|P02817|AMELX_BOVIN Amelogenin, X isoform OS=Bos taurus OX=9913 GN=AMELX PE=1 SV=2	1	hf1_10472_ebo_34_1_261219.ScanId;v=1;d1=33548.33548.3	controllerType=0 controllerNumber=1 scan=33548	66.1556
49159:3	1	S.MP[+15.995]LPPHPGHP[+31.990]GYINF[+31.990]SY[+15.995]EVLTPL.K		F[+32], P[+16][+32], Y[+16]	891.429	3	2672.27	2672.27	0	0.5	17	Non	46.08	46.08	0	1.13	2376	>sp|P02817|AMELX_BOVIN Amelogenin, X isoform OS=Bos taurus OX=9913 GN=AMELX PE=1 SV=2	1	hf1_10472_ebo_34_1_261219.ScanId;v=1;d1=35911.35911.3	controllerType=0 controllerNumber=1 scan=35911	71.7073
34171:2	1	S.MPLPPHPGHP[+31.990]GY[+15.995]IN[+0.984]F[+31.990]SYEVLTPL.K		F[+32], N[+1], P[+32], Y[+16]	1329.14	2	2657.28	2657.26	0	7.9	17	Non	184.61	184.61	5.3	2.68	2376	>sp|P02817|AMELX_BOVIN Amelogenin, X isoform OS=Bos taurus OX=9913 GN=AMELX PE=1 SV=2	1	hf1_10472_ebo_34_1_261219.ScanId;v=1;d1=25396.25396.2	controllerType=0 controllerNumber=1 scan=25396	51.3275
30253:3	1	S.MP[+15.995]LPPHPGHPGY[+31.990]INF[+31.990]SY[+15.995]EVLTPL.K		F[+32], P[+16], Y[+16][+32]	891.429	3	2672.27	2672.27	0	1.4	17	Non	205.78	205.78	1.63	2.32	2376	>sp|P02817|AMELX_BOVIN Amelogenin, X isoform OS=Bos taurus OX=9913 GN=AMELX PE=1 SV=2	1	hf1_10472_ebo_34_1_261219.ScanId;v=1;d1=22773.22773.5	controllerType=0 controllerNumber=1 scan=22773	46.7754
47965:3	1	S.MPLPPHPGHPGYINFS[+79.966]YEVLTPLK.W		S[+80]	928.793	3	2784.37	2784.36	0	1.2	17	NRagged	10.88	10.88	10.88	2.33	2376	>sp|P02817|AMELX_BOVIN Amelogenin, X isoform OS=Bos taurus OX=9913 GN=AMELX PE=1 SV=2	1	hf1_10472_ebo_34_1_261219.ScanId;v=1;d1=34870.34870.3	controllerType=0 controllerNumber=1 scan=34870	69.2475
49176:3	1	S.MPLPPHPGHPGYINFS[+79.966]YEVLTPLK.W		S[+80]	928.795	3	2784.37	2784.36	0	3.5	17	NRagged	35.44	35.44	35.44	2.48	2376	>sp|P02817|AMELX_BOVIN Amelogenin, X isoform OS=Bos taurus OX=9913 GN=AMELX PE=1 SV=2	1	hf1_10472_ebo_34_1_261219.ScanId;v=1;d1=35926.35926.3	controllerType=0 controllerNumber=1 scan=35926	71.7415
47342:4	1	S.MPLPPHPGHPGYINFS[+79.966]YEVLTPLK.W		S[+80]	696.848	4	2784.37	2784.36	0	2.5	17	NRagged	74.62	74.62	4.04	2.51	2376	>sp|P02817|AMELX_BOVIN Amelogenin, X isoform OS=Bos taurus OX=9913 GN=AMELX PE=1 SV=2	1	hf1_10472_ebo_34_1_261219.ScanId;v=1;d1=34334.34334.4	controllerType=0 controllerNumber=1 scan=34334	68.0198
48877:3	1	S.MPLPPHPGHPGYINFS[+79.966]YEVLTPLK.W		S[+80]	928.795	3	2784.37	2784.36	0	3.6	17	NRagged	114.77	114.77	100.6	3.04	2376	>sp|P02817|AMELX_BOVIN Amelogenin, X isoform OS=Bos taurus OX=9913 GN=AMELX PE=1 SV=2	1	hf1_10472_ebo_34_1_261219.ScanId;v=1;d1=35671.35671.3	controllerType=0 controllerNumber=1 scan=35671	71.1643
46853:4	1	S.MPLPPHPGHPGYINFS[+79.966]YEVLTPLK.W		S[+80]	696.848	4	2784.37	2784.36	0	3.6	17	NRagged	148.14	148.14	43.8	3.26	2376	>sp|P02817|AMELX_BOVIN Amelogenin, X isoform OS=Bos taurus OX=9913 GN=AMELX PE=1 SV=2	1	hf1_10472_ebo_34_1_261219.ScanId;v=1;d1=33894.33894.4	controllerType=0 controllerNumber=1 scan=33894	66.957
28399:4	1	S.MP[+15.995]LPPHPGHPGYINFSYEVLTPLK.W		P[+16]	680.849	4	2720.38	2720.39	0	-5.6	17	NRagged	299.83	299.83	5.8	4.79	2376	>sp|P02817|AMELX_BOVIN Amelogenin, X isoform OS=Bos taurus OX=9913 GN=AMELX PE=1 SV=2	1	hf1_10472_ebo_34_1_261219.ScanId;v=1;d1=21534.21534.4	controllerType=0 controllerNumber=1 scan=21534	44.6414
26260:4	1	S.MP[+15.995]LPPHPGHPGYINFSYEVLTPLK.W		P[+16]	680.856	4	2720.4	2720.39	0	4.8	17	NRagged	308	204.28	5.8	5.55	2376	>sp|P02817|AMELX_BOVIN Amelogenin, X isoform OS=Bos taurus OX=9913 GN=AMELX PE=1 SV=2	1	hf1_10472_ebo_34_1_261219.ScanId;v=1;d1=20070.20070.2	controllerType=0 controllerNumber=1 scan=20070	42.1694
29638:5	1	S.MPLPPHPGHPGYINFS[+79.966]YEVLTPLK.W		S[+80]	557.682	5	2784.38	2784.36	0	6.8	17	NRagged	312.03	312.03	38.94	5.42	2376	>sp|P02817|AMELX_BOVIN Amelogenin, X isoform OS=Bos taurus OX=9913 GN=AMELX PE=1 SV=2	1	hf1_10472_ebo_34_1_261219.ScanId;v=1;d1=22358.22358.5	controllerType=0 controllerNumber=1 scan=22358	46.0576
26662:4	1	S.MP[+15.995]LPPHPGHPGYINFSYEVLTPLK.W		P[+16]	680.856	4	2720.4	2720.39	0	3.8	17	NRagged	359.74	359.74	5.8	6.4	2376	>sp|P02817|AMELX_BOVIN Amelogenin, X isoform OS=Bos taurus OX=9913 GN=AMELX PE=1 SV=2	1	hf1_10472_ebo_34_1_261219.ScanId;v=1;d1=20342.20342.6	controllerType=0 controllerNumber=1 scan=20342	42.6281
29312:5	1	S.MPLPPHPGHPGYINFS[+79.966]YEVLTPLK.W		S[+80]	557.681	5	2784.38	2784.36	0	5.3	17	NRagged	376.65	376.65	89.93	6.87	2376	>sp|P02817|AMELX_BOVIN Amelogenin, X isoform OS=Bos taurus OX=9913 GN=AMELX PE=1 SV=2	1	hf1_10472_ebo_34_1_261219.ScanId;v=1;d1=22150.22150.5	controllerType=0 controllerNumber=1 scan=22150	45.6975
28050:4	1	S.MP[+15.995]LPPHPGHPGYINFSYEVLTPLK.W		P[+16]	680.857	4	2720.4	2720.39	0	5.2	17	NRagged	408.55	408.55	5.8	7.33	2376	>sp|P02817|AMELX_BOVIN Amelogenin, X isoform OS=Bos taurus OX=9913 GN=AMELX PE=1 SV=2	1	hf1_10472_ebo_34_1_261219.ScanId;v=1;d1=21302.21302.4	controllerType=0 controllerNumber=1 scan=21302	44.2483
27003:4	1	S.M[+15.995]PLPPHPGHPGYINFSYEVLTPLK.W		M[+16]	680.854	4	2720.39	2720.39	0	1.3	17	NRagged	572.28	539.92	7.7	8.71	2376	>sp|P02817|AMELX_BOVIN Amelogenin, X isoform OS=Bos taurus OX=9913 GN=AMELX PE=1 SV=2	1	hf1_10472_ebo_34_1_261219.ScanId;v=1;d1=20572.20572.4	controllerType=0 controllerNumber=1 scan=20572	43.0189
26508:4	1	S.MP[+15.995]LPPHPGHPGYINFSYEVLTPLK.W		P[+16]	680.856	4	2720.4	2720.39	0	4.3	17	NRagged	663.45	663.45	5.8	11.14	2376	>sp|P02817|AMELX_BOVIN Amelogenin, X isoform OS=Bos taurus OX=9913 GN=AMELX PE=1 SV=2	1	hf1_10472_ebo_34_1_261219.ScanId;v=1;d1=20241.20241.4	controllerType=0 controllerNumber=1 scan=20241	42.4574
26154:4	1	S.MP[+15.995]LPPHPGHPGYINFSYEVLTPLK.W		P[+16]	680.857	4	2720.41	2720.39	0	5.5	17	NRagged	673.71	673.71	5.8	11.32	2376	>sp|P02817|AMELX_BOVIN Amelogenin, X isoform OS=Bos taurus OX=9913 GN=AMELX PE=1 SV=2	1	hf1_10472_ebo_34_1_261219.ScanId;v=1;d1=20004.20004.4	controllerType=0 controllerNumber=1 scan=20004	42.0582
29805:2	1	S.MPLPPHPGHPGYINFS[+79.966]YEVLTPLK.W		S[+80]	1392.7	2	2784.38	2784.36	0	8.1	17	NRagged	720.51	720.51	234.26	12.24	2376	>sp|P02817|AMELX_BOVIN Amelogenin, X isoform OS=Bos taurus OX=9913 GN=AMELX PE=1 SV=2	1	hf1_10472_ebo_34_1_261219.ScanId;v=1;d1=22471.22471.2	controllerType=0 controllerNumber=1 scan=22471	46.2535
29737:4	1	S.MPLPPHPGHPGYINFS[+79.966]YEVLTPLK.W		S[+80]	696.85	4	2784.38	2784.36	0	6.4	17	NRagged	744.75	744.75	400.87	12.32	2376	>sp|P02817|AMELX_BOVIN Amelogenin, X isoform OS=Bos taurus OX=9913 GN=AMELX PE=1 SV=2	1	hf1_10472_ebo_34_1_261219.ScanId;v=1;d1=22427.22427.4	controllerType=0 controllerNumber=1 scan=22427	46.1787
29186:2	1	S.MPLPPHPGHPGYINFS[+79.966]YEVLTPLK.W		S[+80]	1392.69	2	2784.38	2784.36	0	5.3	17	NRagged	773.23	773.23	263.72	12.57	2376	>sp|P02817|AMELX_BOVIN Amelogenin, X isoform OS=Bos taurus OX=9913 GN=AMELX PE=1 SV=2	1	hf1_10472_ebo_34_1_261219.ScanId;v=1;d1=22068.22068.2	controllerType=0 controllerNumber=1 scan=22068	45.5548
29112:4	1	S.MPLPPHPGHPGYINFS[+79.966]YEVLTPLK.W		S[+80]	696.851	4	2784.38	2784.36	0	6.7	17	NRagged	777.4	777.4	399.79	13.37	2376	>sp|P02817|AMELX_BOVIN Amelogenin, X isoform OS=Bos taurus OX=9913 GN=AMELX PE=1 SV=2	1	hf1_10472_ebo_34_1_261219.ScanId;v=1;d1=22019.22019.4	controllerType=0 controllerNumber=1 scan=22019	45.4723
29420:4	1	S.MPLPPHPGHPGYINFS[+79.966]YEVLTPLK.W		S[+80]	696.851	4	2784.38	2784.36	0	6.8	17	NRagged	802.58	802.58	430.77	14.37	2376	>sp|P02817|AMELX_BOVIN Amelogenin, X isoform OS=Bos taurus OX=9913 GN=AMELX PE=1 SV=2	1	hf1_10472_ebo_34_1_261219.ScanId;v=1;d1=22225.22225.4	controllerType=0 controllerNumber=1 scan=22225	45.8267
29489:2	1	S.MPLPPHPGHPGYINFS[+79.966]YEVLTPLK.W		S[+80]	1392.7	2	2784.38	2784.36	0	7.7	17	NRagged	908.84	908.84	342.28	16.24	2376	>sp|P02817|AMELX_BOVIN Amelogenin, X isoform OS=Bos taurus OX=9913 GN=AMELX PE=1 SV=2	1	hf1_10472_ebo_34_1_261219.ScanId;v=1;d1=22268.22268.2	controllerType=0 controllerNumber=1 scan=22268	45.9006
29736:3	1	S.MPLPPHPGHPGYINFS[+79.966]YEVLTPLK.W		S[+80]	928.797	3	2784.38	2784.36	0	5.3	17	NRagged	1166.63	1166.63	524.08	21.71	2376	>sp|P02817|AMELX_BOVIN Amelogenin, X isoform OS=Bos taurus OX=9913 GN=AMELX PE=1 SV=2	1	hf1_10472_ebo_34_1_261219.ScanId;v=1;d1=22426.22426.3	controllerType=0 controllerNumber=1 scan=22426	46.178
29122:3	1	S.MPLPPHPGHPGYINFS[+79.966]YEVLTPLK.W		S[+80]	928.798	3	2784.38	2784.36	0	6.3	17	NRagged	1193.85	1193.85	538.3	21.71	2376	>sp|P02817|AMELX_BOVIN Amelogenin, X isoform OS=Bos taurus OX=9913 GN=AMELX PE=1 SV=2	1	hf1_10472_ebo_34_1_261219.ScanId;v=1;d1=22026.22026.3	controllerType=0 controllerNumber=1 scan=22026	45.4853
29419:3	1	S.MPLPPHPGHPGYINFS[+79.966]YEVLTPLK.W		S[+80]	928.798	3	2784.38	2784.36	0	5.9	17	NRagged	1226.57	1226.57	585.69	22.71	2376	>sp|P02817|AMELX_BOVIN Amelogenin, X isoform OS=Bos taurus OX=9913 GN=AMELX PE=1 SV=2	1	hf1_10472_ebo_34_1_261219.ScanId;v=1;d1=22224.22224.3	controllerType=0 controllerNumber=1 scan=22224	45.826
28323:3	1	S.M[+31.990]PLPPHPGHPGYIN[+0.984]FSYEVLTPLK.W		M[+32], N[+1]	913.134	3	2737.39	2737.37	0	6.9	17	NRagged	1.73	1.73	0	0.54	2376	>sp|P02817|AMELX_BOVIN Amelogenin, X isoform OS=Bos taurus OX=9913 GN=AMELX PE=1 SV=2	1	hf1_10472_ebo_34_1_261219.ScanId;v=1;d1=21484.21484.3	controllerType=0 controllerNumber=1 scan=21484	44.5587
47678:3	1	S.MPLPPHPGHPGYIN[+0.984]FS[+79.966]YEVLTPLK.W		N[+1], S[+80]	929.129	3	2785.37	2785.35	0	9.7	17	NRagged	26.86	26.86	26.86	2.4	2376	>sp|P02817|AMELX_BOVIN Amelogenin, X isoform OS=Bos taurus OX=9913 GN=AMELX PE=1 SV=2	1	hf1_10472_ebo_34_1_261219.ScanId;v=1;d1=34618.34618.3	controllerType=0 controllerNumber=1 scan=34618	68.6729
50663:3	1	S.MP[+15.995]LPPHPGHPGYINFS[+79.966]YEVLTPLK.W		P[+16], S[+80]	934.128	3	2800.37	2800.36	0	4.7	17	NRagged	29.09	29.09	4	2.77	2376	>sp|P02817|AMELX_BOVIN Amelogenin, X isoform OS=Bos taurus OX=9913 GN=AMELX PE=1 SV=2	1	hf1_10472_ebo_34_1_261219.ScanId;v=1;d1=37579.37579.3	controllerType=0 controllerNumber=1 scan=37579	77.2799
47831:3	1	S.MP[+15.995]LPPHPGHPGYINFS[+79.966]YEVLTPLK.W		P[+16], S[+80]	934.127	3	2800.37	2800.36	0	3.9	17	NRagged	35.91	35.91	4	2.48	2376	>sp|P02817|AMELX_BOVIN Amelogenin, X isoform OS=Bos taurus OX=9913 GN=AMELX PE=1 SV=2	1	hf1_10472_ebo_34_1_261219.ScanId;v=1;d1=34753.34753.3	controllerType=0 controllerNumber=1 scan=34753	68.9835
00477:3	1	S.MP[+15.995]LPPHPGHPGYINFS[+79.966]YEVLTPLK.W		P[+16], S[+80]	934.126	3	2800.36	2800.36	0	2.5	17	NRagged	46.06	46.06	4	2.81	2376	>sp|P02817|AMELX_BOVIN Amelogenin, X isoform OS=Bos taurus OX=9913 GN=AMELX PE=1 SV=2	1	hf1_10472_ebo_34_1_261219.ScanId;v=1;d1=2185.2185.3	controllerType=0 controllerNumber=1 scan=2185	11.7546
47833:3	1	S.MP[+15.995]LPPHPGHPGYINFS[+79.966]YEVLTPLK.W		P[+16], S[+80]	934.127	3	2800.37	2800.36	0	3.9	17	NRagged	50.83	50.83	4	2.95	2376	>sp|P02817|AMELX_BOVIN Amelogenin, X isoform OS=Bos taurus OX=9913 GN=AMELX PE=1 SV=2	1	hf1_10472_ebo_34_1_261219.ScanId;v=1;d1=34755.34755.3	controllerType=0 controllerNumber=1 scan=34755	68.9892
48844:3	1	S.MPLPPHPGHPGYIN[+0.984]FS[+79.966]YEVLTPLK.W		N[+1], S[+80]	929.126	3	2785.36	2785.35	0	6.7	17	NRagged	80.39	80.39	63.89	3.24	2376	>sp|P02817|AMELX_BOVIN Amelogenin, X isoform OS=Bos taurus OX=9913 GN=AMELX PE=1 SV=2	1	hf1_10472_ebo_34_1_261219.ScanId;v=1;d1=35635.35635.3	controllerType=0 controllerNumber=1 scan=35635	71.0683
48306:3	1	S.MP[+15.995]LPPHPGHPGYINFS[+79.966]YEVLTPLK.W		P[+16], S[+80]	934.127	3	2800.37	2800.36	0	3.5	17	NRagged	92.31	92.31	4	3.29	2376	>sp|P02817|AMELX_BOVIN Amelogenin, X isoform OS=Bos taurus OX=9913 GN=AMELX PE=1 SV=2	1	hf1_10472_ebo_34_1_261219.ScanId;v=1;d1=35175.35175.3	controllerType=0 controllerNumber=1 scan=35175	70.0049
46540:3	1	S.MP[+15.995]LPPHPGHPGYINFS[+79.966]YEVLTPLK.W		P[+16], S[+80]	934.128	3	2800.37	2800.36	0	4.1	17	NRagged	97.39	97.39	28.95	2.77	2376	>sp|P02817|AMELX_BOVIN Amelogenin, X isoform OS=Bos taurus OX=9913 GN=AMELX PE=1 SV=2	1	hf1_10472_ebo_34_1_261219.ScanId;v=1;d1=33629.33629.3	controllerType=0 controllerNumber=1 scan=33629	66.3444
48003:3	1	S.M[+15.995]PLPPHPGHPGYINFS[+79.966]YEVLTPLK.W		M[+16], S[+80]	934.129	3	2800.37	2800.36	0	5.3	17	NRagged	100.3	100.3	18.79	3.46	2376	>sp|P02817|AMELX_BOVIN Amelogenin, X isoform OS=Bos taurus OX=9913 GN=AMELX PE=1 SV=2	1	hf1_10472_ebo_34_1_261219.ScanId;v=1;d1=34904.34904.3	controllerType=0 controllerNumber=1 scan=34904	69.3297
46006:3	1	S.MP[+15.995]LPPHPGHPGYINFS[+79.966]YEVLTPLK.W		P[+16], S[+80]	934.128	3	2800.37	2800.36	0	4.3	17	NRagged	119.87	119.87	4	2.78	2376	>sp|P02817|AMELX_BOVIN Amelogenin, X isoform OS=Bos taurus OX=9913 GN=AMELX PE=1 SV=2	1	hf1_10472_ebo_34_1_261219.ScanId;v=1;d1=33145.33145.3	controllerType=0 controllerNumber=1 scan=33145	65.1789
46066:3	1	S.MP[+15.995]LPPHPGHPGYINFS[+79.966]YEVLTPLK.W		P[+16], S[+80]	934.126	3	2800.36	2800.36	0	2.8	17	NRagged	122.94	122.94	4	3.04	2376	>sp|P02817|AMELX_BOVIN Amelogenin, X isoform OS=Bos taurus OX=9913 GN=AMELX PE=1 SV=2	1	hf1_10472_ebo_34_1_261219.ScanId;v=1;d1=33192.33192.3	controllerType=0 controllerNumber=1 scan=33192	65.2721
46668:3	1	S.MPLPPHPGHPGYIN[+0.984]FS[+79.966]YEVLTPLK.W		N[+1], S[+80]	929.128	3	2785.37	2785.35	0	8.5	17	NRagged	123.52	123.52	47.96	2.6	2376	>sp|P02817|AMELX_BOVIN Amelogenin, X isoform OS=Bos taurus OX=9913 GN=AMELX PE=1 SV=2	1	hf1_10472_ebo_34_1_261219.ScanId;v=1;d1=33737.33737.3	controllerType=0 controllerNumber=1 scan=33737	66.5919
27460:5	1	S.MP[+15.995]LPPHPGHPGYINFS[+79.966]YEVLTPLK.W		P[+16], S[+80]	560.879	5	2800.37	2800.36	0	3.9	17	NRagged	133.68	133.68	2.05	2.34	2376	>sp|P02817|AMELX_BOVIN Amelogenin, X isoform OS=Bos taurus OX=9913 GN=AMELX PE=1 SV=2	1	hf1_10472_ebo_34_1_261219.ScanId;v=1;d1=20888.20888.5	controllerType=0 controllerNumber=1 scan=20888	43.5411
28219:4	1	S.MPLPPHP[+31.990]GHPGYIN[+0.984]FSYEVLTPLK.W		N[+1], P[+32]	685.103	4	2737.39	2737.37	0	6.9	17	NRagged	140.09	113.45	0.27	2.33	2376	>sp|P02817|AMELX_BOVIN Amelogenin, X isoform OS=Bos taurus OX=9913 GN=AMELX PE=1 SV=2	1	hf1_10472_ebo_34_1_261219.ScanId;v=1;d1=21418.21418.4	controllerType=0 controllerNumber=1 scan=21418	44.4499
46730:3	1	S.M[+15.995]PLPPHPGHPGYINFS[+79.966]YEVLTPLK.W		M[+16], S[+80]	934.128	3	2800.37	2800.36	0	3.9	17	NRagged	146.9	146.9	17.97	3.95	2376	>sp|P02817|AMELX_BOVIN Amelogenin, X isoform OS=Bos taurus OX=9913 GN=AMELX PE=1 SV=2	1	hf1_10472_ebo_34_1_261219.ScanId;v=1;d1=33794.33794.3	controllerType=0 controllerNumber=1 scan=33794	66.7203
50190:3	1	S.MP[+15.995]LPPHPGHPGYINFS[+79.966]YEVLTPLK.W		P[+16], S[+80]	934.131	3	2800.38	2800.36	0	7.5	17	NRagged	153.03	153.03	4	3.84	2376	>sp|P02817|AMELX_BOVIN Amelogenin, X isoform OS=Bos taurus OX=9913 GN=AMELX PE=1 SV=2	1	hf1_10472_ebo_34_1_261219.ScanId;v=1;d1=36849.36849.3	controllerType=0 controllerNumber=1 scan=36849	74.1231
48151:3	1	S.MP[+15.995]LPPHPGHPGYINFS[+79.966]YEVLTPLK.W		P[+16], S[+80]	934.125	3	2800.36	2800.36	0	1.1	17	NRagged	184.95	184.95	4	4.18	2376	>sp|P02817|AMELX_BOVIN Amelogenin, X isoform OS=Bos taurus OX=9913 GN=AMELX PE=1 SV=2	1	hf1_10472_ebo_34_1_261219.ScanId;v=1;d1=35038.35038.3	controllerType=0 controllerNumber=1 scan=35038	69.6651
49145:3	1	S.MPLPPHPGHPGYIN[+0.984]FS[+79.966]YEVLTPLK.W		N[+1], S[+80]	929.129	3	2785.37	2785.35	0	9.6	17	NRagged	192.26	192.26	49.21	3.7	2376	>sp|P02817|AMELX_BOVIN Amelogenin, X isoform OS=Bos taurus OX=9913 GN=AMELX PE=1 SV=2	1	hf1_10472_ebo_34_1_261219.ScanId;v=1;d1=35898.35898.3	controllerType=0 controllerNumber=1 scan=35898	71.6796
48832:3	1	S.MP[+15.995]LPPHPGHPGYINFS[+79.966]YEVLTPLK.W		P[+16], S[+80]	934.127	3	2800.37	2800.36	0	3.8	17	NRagged	204.86	204.86	4	4.65	2376	>sp|P02817|AMELX_BOVIN Amelogenin, X isoform OS=Bos taurus OX=9913 GN=AMELX PE=1 SV=2	1	hf1_10472_ebo_34_1_261219.ScanId;v=1;d1=35624.35624.3	controllerType=0 controllerNumber=1 scan=35624	71.0435
48503:3	1	S.M[+15.995]PLPPHPGHPGYINFS[+79.966]YEVLTPLK.W		M[+16], S[+80]	934.126	3	2800.36	2800.36	0	2.6	17	NRagged	218.31	218.31	17.58	4.45	2376	>sp|P02817|AMELX_BOVIN Amelogenin, X isoform OS=Bos taurus OX=9913 GN=AMELX PE=1 SV=2	1	hf1_10472_ebo_34_1_261219.ScanId;v=1;d1=35334.35334.3	controllerType=0 controllerNumber=1 scan=35334	70.3519
47156:3	1	S.MP[+15.995]LPPHPGHPGYINFS[+79.966]YEVLTPLK.W		P[+16], S[+80]	934.127	3	2800.37	2800.36	0	3.9	17	NRagged	226.32	226.32	4	4.87	2376	>sp|P02817|AMELX_BOVIN Amelogenin, X isoform OS=Bos taurus OX=9913 GN=AMELX PE=1 SV=2	1	hf1_10472_ebo_34_1_261219.ScanId;v=1;d1=34163.34163.3	controllerType=0 controllerNumber=1 scan=34163	67.5931
49338:3	1	S.MP[+15.995]LPPHPGHPGYINFS[+79.966]YEVLTPLK.W		P[+16], S[+80]	934.126	3	2800.36	2800.36	0	2.7	17	NRagged	238.01	238.01	4	5.39	2376	>sp|P02817|AMELX_BOVIN Amelogenin, X isoform OS=Bos taurus OX=9913 GN=AMELX PE=1 SV=2	1	hf1_10472_ebo_34_1_261219.ScanId;v=1;d1=36066.36066.3	controllerType=0 controllerNumber=1 scan=36066	72.0898
49168:3	1	S.MP[+15.995]LPPHPGHPGYINFS[+79.966]YEVLTPLK.W		P[+16], S[+80]	934.127	3	2800.37	2800.36	0	3.9	17	NRagged	241.8	241.8	4	6.1	2376	>sp|P02817|AMELX_BOVIN Amelogenin, X isoform OS=Bos taurus OX=9913 GN=AMELX PE=1 SV=2	1	hf1_10472_ebo_34_1_261219.ScanId;v=1;d1=35918.35918.3	controllerType=0 controllerNumber=1 scan=35918	71.7206
48993:3	1	S.MP[+15.995]LPPHPGHPGYINFS[+79.966]YEVLTPLK.W		P[+16], S[+80]	934.127	3	2800.37	2800.36	0	3.7	17	NRagged	246.34	246.34	4	6.05	2376	>sp|P02817|AMELX_BOVIN Amelogenin, X isoform OS=Bos taurus OX=9913 GN=AMELX PE=1 SV=2	1	hf1_10472_ebo_34_1_261219.ScanId;v=1;d1=35767.35767.3	controllerType=0 controllerNumber=1 scan=35767	71.3809
00345:4	1	S.MP[+15.995]LPPHPGHPGYINFS[+79.966]YEVLTPLK.W		P[+16], S[+80]	700.846	4	2800.36	2800.36	0	1.6	17	NRagged	251.39	251.39	4	5.29	2376	>sp|P02817|AMELX_BOVIN Amelogenin, X isoform OS=Bos taurus OX=9913 GN=AMELX PE=1 SV=2	1	hf1_10472_ebo_34_1_261219.ScanId;v=1;d1=1936.1936.4	controllerType=0 controllerNumber=1 scan=1936	10.5949
48672:3	1	S.MP[+15.995]LPPHPGHPGYINFS[+79.966]YEVLTPLK.W		P[+16], S[+80]	934.127	3	2800.37	2800.36	0	3.1	17	NRagged	252.5	252.5	4	6.72	2376	>sp|P02817|AMELX_BOVIN Amelogenin, X isoform OS=Bos taurus OX=9913 GN=AMELX PE=1 SV=2	1	hf1_10472_ebo_34_1_261219.ScanId;v=1;d1=35482.35482.3	controllerType=0 controllerNumber=1 scan=35482	70.6982
46915:3	1	S.M[+15.995]PLPPHPGHPGYINFS[+79.966]YEVLTPLK.W		M[+16], S[+80]	934.126	3	2800.36	2800.36	0	2.5	17	NRagged	254.78	254.78	17.71	5.53	2376	>sp|P02817|AMELX_BOVIN Amelogenin, X isoform OS=Bos taurus OX=9913 GN=AMELX PE=1 SV=2	1	hf1_10472_ebo_34_1_261219.ScanId;v=1;d1=33947.33947.3	controllerType=0 controllerNumber=1 scan=33947	67.0663
27924:5	1	S.MP[+15.995]LPPHPGHPGYINFS[+79.966]YEVLTPLK.W		P[+16], S[+80]	560.88	5	2800.37	2800.36	0	5.3	17	NRagged	267.46	267.46	5.8	5.05	2376	>sp|P02817|AMELX_BOVIN Amelogenin, X isoform OS=Bos taurus OX=9913 GN=AMELX PE=1 SV=2	1	hf1_10472_ebo_34_1_261219.ScanId;v=1;d1=21210.21210.5	controllerType=0 controllerNumber=1 scan=21210	44.095
46248:3	1	S.MP[+15.995]LPPHPGHPGYINFS[+79.966]YEVLTPLK.W		P[+16], S[+80]	934.121	3	2800.35	2800.36	0	-2.9	17	NRagged	268.93	268.93	4	5.33	2376	>sp|P02817|AMELX_BOVIN Amelogenin, X isoform OS=Bos taurus OX=9913 GN=AMELX PE=1 SV=2	1	hf1_10472_ebo_34_1_261219.ScanId;v=1;d1=33350.33350.3	controllerType=0 controllerNumber=1 scan=33350	65.6223
47659:3	1	S.MP[+15.995]LPPHPGHPGYINFS[+79.966]YEVLTPLK.W		P[+16], S[+80]	934.126	3	2800.36	2800.36	0	2.2	17	NRagged	279.96	279.96	4	5.74	2376	>sp|P02817|AMELX_BOVIN Amelogenin, X isoform OS=Bos taurus OX=9913 GN=AMELX PE=1 SV=2	1	hf1_10472_ebo_34_1_261219.ScanId;v=1;d1=34601.34601.3	controllerType=0 controllerNumber=1 scan=34601	68.6332
26164:3	1	S.M[+15.995]PLPPHPGHPGYINFS[+79.966]YEVLTPLK.W		M[+16], S[+80]	934.128	3	2800.37	2800.36	0	4.7	17	NRagged	290.62	290.62	18.64	5.95	2376	>sp|P02817|AMELX_BOVIN Amelogenin, X isoform OS=Bos taurus OX=9913 GN=AMELX PE=1 SV=2	1	hf1_10472_ebo_34_1_261219.ScanId;v=1;d1=20009.20009.4	controllerType=0 controllerNumber=1 scan=20009	42.0658
46595:3	1	S.MP[+15.995]LPPHPGHPGYINFS[+79.966]YEVLTPLK.W		P[+16], S[+80]	934.127	3	2800.37	2800.36	0	3.7	17	NRagged	295.25	295.25	4	6.31	2376	>sp|P02817|AMELX_BOVIN Amelogenin, X isoform OS=Bos taurus OX=9913 GN=AMELX PE=1 SV=2	1	hf1_10472_ebo_34_1_261219.ScanId;v=1;d1=33674.33674.3	controllerType=0 controllerNumber=1 scan=33674	66.4487
26672:3	1	S.M[+15.995]PLPPHPGHPGYINFS[+79.966]YEVLTPLK.W		M[+16], S[+80]	934.129	3	2800.37	2800.36	0	5.9	17	NRagged	303.39	303.39	14.9	6.09	2376	>sp|P02817|AMELX_BOVIN Amelogenin, X isoform OS=Bos taurus OX=9913 GN=AMELX PE=1 SV=2	1	hf1_10472_ebo_34_1_261219.ScanId;v=1;d1=20349.20349.4	controllerType=0 controllerNumber=1 scan=20349	42.6412
00541:3	1	S.M[+15.995]PLPPHPGHPGYINFS[+79.966]YEVLTPLK.W		M[+16], S[+80]	934.126	3	2800.36	2800.36	0	2.7	17	NRagged	330.53	330.53	17.03	6.85	2376	>sp|P02817|AMELX_BOVIN Amelogenin, X isoform OS=Bos taurus OX=9913 GN=AMELX PE=1 SV=2	1	hf1_10472_ebo_34_1_261219.ScanId;v=1;d1=2272.2272.3	controllerType=0 controllerNumber=1 scan=2272	12.103
00143:3	1	S.MP[+15.995]LPPHPGHPGYINFS[+79.966]YEVLTPLK.W		P[+16], S[+80]	934.125	3	2800.36	2800.36	0	1.6	17	NRagged	344.07	344.07	4	6.85	2376	>sp|P02817|AMELX_BOVIN Amelogenin, X isoform OS=Bos taurus OX=9913 GN=AMELX PE=1 SV=2	1	hf1_10472_ebo_34_1_261219.ScanId;v=1;d1=631.631.3	controllerType=0 controllerNumber=1 scan=631	3.3274
25887:3	1	S.M[+15.995]PLPPHPGHPGYINFS[+79.966]YEVLTPLK.W		M[+16], S[+80]	934.132	3	2800.38	2800.36	0	8.3	17	NRagged	401.14	401.14	12.46	6.89	2376	>sp|P02817|AMELX_BOVIN Amelogenin, X isoform OS=Bos taurus OX=9913 GN=AMELX PE=1 SV=2	1	hf1_10472_ebo_34_1_261219.ScanId;v=1;d1=19829.19829.3	controllerType=0 controllerNumber=1 scan=19829	41.7666
26030:4	1	S.MP[+15.995]LPP[+15.995]HPGHPGYINFSYEVLTPLK.W		P[+16]*2	684.852	4	2736.39	2736.39	0	0.5	17	NRagged	406.32	406.32	3.76	6.61	2376	>sp|P02817|AMELX_BOVIN Amelogenin, X isoform OS=Bos taurus OX=9913 GN=AMELX PE=1 SV=2	1	hf1_10472_ebo_34_1_261219.ScanId;v=1;d1=19921.19921.6	controllerType=0 controllerNumber=1 scan=19921	41.919
00753:3	1	S.M[+15.995]PLPPHPGHPGYINFS[+79.966]YEVLTPLK.W		M[+16], S[+80]	934.124	3	2800.36	2800.36	0	0.6	17	NRagged	411.08	411.08	34.36	7.89	2376	>sp|P02817|AMELX_BOVIN Amelogenin, X isoform OS=Bos taurus OX=9913 GN=AMELX PE=1 SV=2	1	hf1_10472_ebo_34_1_261219.ScanId;v=1;d1=2431.2431.3	controllerType=0 controllerNumber=1 scan=2431	12.4387
29778:4	1	S.MP[+15.995]LPPHPGHPGYINFS[+79.966]YEVLTPLK.W		P[+16], S[+80]	700.847	4	2800.37	2800.36	0	3	17	NRagged	435.55	435.55	5.8	7.23	2376	>sp|P02817|AMELX_BOVIN Amelogenin, X isoform OS=Bos taurus OX=9913 GN=AMELX PE=1 SV=2	1	hf1_10472_ebo_34_1_261219.ScanId;v=1;d1=22454.22454.6	controllerType=0 controllerNumber=1 scan=22454	46.2226
28267:4	1	S.MP[+31.990]LPPHPGHPGYINFS[+79.966]YEVLTPLK.W		P[+32], S[+80]	704.845	4	2816.36	2816.35	0	2.4	17	NRagged	478.92	478.92	1.8	7.06	2376	>sp|P02817|AMELX_BOVIN Amelogenin, X isoform OS=Bos taurus OX=9913 GN=AMELX PE=1 SV=2	1	hf1_10472_ebo_34_1_261219.ScanId;v=1;d1=21448.21448.4	controllerType=0 controllerNumber=1 scan=21448	44.4966
32264:3	1	S.MPLP[+15.995]PHPGHPGYINFS[+79.966]YEVLTPLK.W		P[+16], S[+80]	934.129	3	2800.37	2800.36	0	5.9	17	NRagged	494.36	494.36	2.08	7.87	2376	>sp|P02817|AMELX_BOVIN Amelogenin, X isoform OS=Bos taurus OX=9913 GN=AMELX PE=1 SV=2	1	hf1_10472_ebo_34_1_261219.ScanId;v=1;d1=24090.24090.3	controllerType=0 controllerNumber=1 scan=24090	49.0446
27320:4	1	S.MP[+15.995]LPPHPGHPGYIN[+0.984]FSYEVLTPLK.W		N[+1], P[+16]	681.101	4	2721.38	2721.37	0	3.4	17	NRagged	542.38	542.38	5.8	8.33	2376	>sp|P02817|AMELX_BOVIN Amelogenin, X isoform OS=Bos taurus OX=9913 GN=AMELX PE=1 SV=2	1	hf1_10472_ebo_34_1_261219.ScanId;v=1;d1=20788.20788.4	controllerType=0 controllerNumber=1 scan=20788	43.3797
26735:3	1	S.M[+15.995]PLPPHPGHPGYINFS[+79.966]YEVLTPLK.W		M[+16], S[+80]	934.131	3	2800.38	2800.36	0	7.5	17	NRagged	564.97	564.97	26.83	9.14	2376	>sp|P02817|AMELX_BOVIN Amelogenin, X isoform OS=Bos taurus OX=9913 GN=AMELX PE=1 SV=2	1	hf1_10472_ebo_34_1_261219.ScanId;v=1;d1=20388.20388.3	controllerType=0 controllerNumber=1 scan=20388	42.7067
29043:4	1	S.MPLPPHPGHP[+15.995]GYINFS[+79.966]YEVLTPLK.W		P[+16], S[+80]	700.848	4	2800.37	2800.36	0	5	17	NRagged	615.06	615.06	4.65	10.32	2376	>sp|P02817|AMELX_BOVIN Amelogenin, X isoform OS=Bos taurus OX=9913 GN=AMELX PE=1 SV=2	1	hf1_10472_ebo_34_1_261219.ScanId;v=1;d1=21971.21971.4	controllerType=0 controllerNumber=1 scan=21971	45.391
29447:4	1	S.MP[+15.995]LPPHPGHPGYINFS[+79.966]YEVLTPLK.W		P[+16], S[+80]	700.846	4	2800.36	2800.36	0	2.6	17	NRagged	615.71	615.71	5.8	9.09	2376	>sp|P02817|AMELX_BOVIN Amelogenin, X isoform OS=Bos taurus OX=9913 GN=AMELX PE=1 SV=2	1	hf1_10472_ebo_34_1_261219.ScanId;v=1;d1=22241.22241.4	controllerType=0 controllerNumber=1 scan=22241	45.8532
00344:3	1	S.M[+15.995]PLPPHPGHPGYINFS[+79.966]YEVLTPLK.W		M[+16], S[+80]	934.127	3	2800.37	2800.36	0	3.5	17	NRagged	623.11	623.11	36.25	10.53	2376	>sp|P02817|AMELX_BOVIN Amelogenin, X isoform OS=Bos taurus OX=9913 GN=AMELX PE=1 SV=2	1	hf1_10472_ebo_34_1_261219.ScanId;v=1;d1=1935.1935.3	controllerType=0 controllerNumber=1 scan=1935	10.5934
30326:4	1	S.MPLPPHPGHPGYIN[+0.984]FS[+79.966]YEVLTPLK.W		N[+1], S[+80]	697.096	4	2785.36	2785.35	0	6.1	17	NRagged	709	709	365.03	12.32	2376	>sp|P02817|AMELX_BOVIN Amelogenin, X isoform OS=Bos taurus OX=9913 GN=AMELX PE=1 SV=2	1	hf1_10472_ebo_34_1_261219.ScanId;v=1;d1=22823.22823.4	controllerType=0 controllerNumber=1 scan=22823	46.8625
27406:2	1	S.M[+15.995]PLPPHPGHPGYINFS[+79.966]YEVLTPLK.W		M[+16], S[+80]	1400.69	2	2800.37	2800.36	0	5.3	17	NRagged	713	713	23.12	12.19	2376	>sp|P02817|AMELX_BOVIN Amelogenin, X isoform OS=Bos taurus OX=9913 GN=AMELX PE=1 SV=2	1	hf1_10472_ebo_34_1_261219.ScanId;v=1;d1=20849.20849.2	controllerType=0 controllerNumber=1 scan=20849	43.4766
28136:4	1	S.M[+15.995]PLPPHPGHPGYINFS[+79.966]YEVLTPLK.W		M[+16], S[+80]	700.849	4	2800.37	2800.36	0	6.4	17	NRagged	721.72	721.72	5.66	12.32	2376	>sp|P02817|AMELX_BOVIN Amelogenin, X isoform OS=Bos taurus OX=9913 GN=AMELX PE=1 SV=2	1	hf1_10472_ebo_34_1_261219.ScanId;v=1;d1=21362.21362.4	controllerType=0 controllerNumber=1 scan=21362	44.3558
27860:4	1	S.M[+15.995]PLPPHPGHPGYINFS[+79.966]YEVLTPLK.W		M[+16], S[+80]	700.849	4	2800.37	2800.36	0	5.9	17	NRagged	725.13	725.13	6.89	12.32	2376	>sp|P02817|AMELX_BOVIN Amelogenin, X isoform OS=Bos taurus OX=9913 GN=AMELX PE=1 SV=2	1	hf1_10472_ebo_34_1_261219.ScanId;v=1;d1=21164.21164.4	controllerType=0 controllerNumber=1 scan=21164	44.0188
27170:3	1	S.M[+15.995]PLPPHPGHPGYINFS[+79.966]YEVLTPLK.W		M[+16], S[+80]	934.13	3	2800.38	2800.36	0	6.5	17	NRagged	737.42	737.42	9.83	12.76	2376	>sp|P02817|AMELX_BOVIN Amelogenin, X isoform OS=Bos taurus OX=9913 GN=AMELX PE=1 SV=2	1	hf1_10472_ebo_34_1_261219.ScanId;v=1;d1=20691.20691.3	controllerType=0 controllerNumber=1 scan=20691	43.2162
49997:4	1	S.MP[+15.995]LPPHPGHPGYINFS[+79.966]YEVLTPLK.W		P[+16], S[+80]	700.851	4	2800.38	2800.36	0	8.8	17	NRagged	745.48	745.48	5.8	11.51	2376	>sp|P02817|AMELX_BOVIN Amelogenin, X isoform OS=Bos taurus OX=9913 GN=AMELX PE=1 SV=2	1	hf1_10472_ebo_34_1_261219.ScanId;v=1;d1=36660.36660.4	controllerType=0 controllerNumber=1 scan=36660	73.5249
27570:4	1	S.MP[+15.995]LPPHPGHPGYINFS[+79.966]YEVLTPLK.W		P[+16], S[+80]	700.848	4	2800.37	2800.36	0	4.6	17	NRagged	752.88	752.88	4	13.32	2376	>sp|P02817|AMELX_BOVIN Amelogenin, X isoform OS=Bos taurus OX=9913 GN=AMELX PE=1 SV=2	1	hf1_10472_ebo_34_1_261219.ScanId;v=1;d1=20966.20966.4	controllerType=0 controllerNumber=1 scan=20966	43.6809
30030:4	1	S.MPLPPHPGHPGYIN[+0.984]FS[+79.966]YEVLTPLK.W		N[+1], S[+80]	697.097	4	2785.37	2785.35	0	6.9	17	NRagged	773.31	773.31	392.29	13.37	2376	>sp|P02817|AMELX_BOVIN Amelogenin, X isoform OS=Bos taurus OX=9913 GN=AMELX PE=1 SV=2	1	hf1_10472_ebo_34_1_261219.ScanId;v=1;d1=22625.22625.4	controllerType=0 controllerNumber=1 scan=22625	46.5207
27692:2	1	S.M[+15.995]PLPPHPGHPGYINFS[+79.966]YEVLTPLK.W		M[+16], S[+80]	1400.69	2	2800.38	2800.36	0	6.8	17	NRagged	811.23	811.23	49.6	14.24	2376	>sp|P02817|AMELX_BOVIN Amelogenin, X isoform OS=Bos taurus OX=9913 GN=AMELX PE=1 SV=2	1	hf1_10472_ebo_34_1_261219.ScanId;v=1;d1=21049.21049.2	controllerType=0 controllerNumber=1 scan=21049	43.8193
29578:3	1	S.MP[+15.995]LPPHPGHPGYINFS[+79.966]YEVLTPLK.W		P[+16], S[+80]	934.126	3	2800.36	2800.36	0	2.4	17	NRagged	811.52	811.52	21.72	14.1	2376	>sp|P02817|AMELX_BOVIN Amelogenin, X isoform OS=Bos taurus OX=9913 GN=AMELX PE=1 SV=2	1	hf1_10472_ebo_34_1_261219.ScanId;v=1;d1=22323.22323.3	controllerType=0 controllerNumber=1 scan=22323	45.9967
28721:3	1	S.MP[+31.990]LPPHPGHPGYINFS[+79.966]YEVLTPLK.W		P[+32], S[+80]	939.46	3	2816.37	2816.35	0	4.8	17	NRagged	816.48	816.48	0.33	14.71	2376	>sp|P02817|AMELX_BOVIN Amelogenin, X isoform OS=Bos taurus OX=9913 GN=AMELX PE=1 SV=2	1	hf1_10472_ebo_34_1_261219.ScanId;v=1;d1=21756.21756.3	controllerType=0 controllerNumber=1 scan=21756	45.0229
29273:3	1	S.MPLPPHPGH[+15.995]PGYINFS[+79.966]YEVLTPLK.W		H[+16], S[+80]	934.127	3	2800.37	2800.36	0	3.7	17	NRagged	844.68	844.68	1.6	14.53	2376	>sp|P02817|AMELX_BOVIN Amelogenin, X isoform OS=Bos taurus OX=9913 GN=AMELX PE=1 SV=2	1	hf1_10472_ebo_34_1_261219.ScanId;v=1;d1=22125.22125.3	controllerType=0 controllerNumber=1 scan=22125	45.6559
28977:3	1	S.MP[+15.995]LPPHPGHPGYINFS[+79.966]YEVLTPLK.W		P[+16], S[+80]	934.127	3	2800.37	2800.36	0	3.7	17	NRagged	890.82	890.82	11.36	15.53	2376	>sp|P02817|AMELX_BOVIN Amelogenin, X isoform OS=Bos taurus OX=9913 GN=AMELX PE=1 SV=2	1	hf1_10472_ebo_34_1_261219.ScanId;v=1;d1=21928.21928.3	controllerType=0 controllerNumber=1 scan=21928	45.3153
27478:3	1	S.M[+15.995]PLPPHPGHPGYINFS[+79.966]YEVLTPLK.W		M[+16], S[+80]	934.127	3	2800.37	2800.36	0	3.6	17	NRagged	1037.97	1037.97	32.24	18.53	2376	>sp|P02817|AMELX_BOVIN Amelogenin, X isoform OS=Bos taurus OX=9913 GN=AMELX PE=1 SV=2	1	hf1_10472_ebo_34_1_261219.ScanId;v=1;d1=20902.20902.3	controllerType=0 controllerNumber=1 scan=20902	43.5669
49991:3	1	S.M[+15.995]PLPPHPGHPGYINFS[+79.966]YEVLTPLK.W		M[+16], S[+80]	934.132	3	2800.38	2800.36	0	9.1	17	NRagged	1063.18	1063.18	49.85	18.89	2376	>sp|P02817|AMELX_BOVIN Amelogenin, X isoform OS=Bos taurus OX=9913 GN=AMELX PE=1 SV=2	1	hf1_10472_ebo_34_1_261219.ScanId;v=1;d1=36656.36656.3	controllerType=0 controllerNumber=1 scan=36656	73.5189
27771:3	1	S.M[+15.995]PLPPHPGHPGYINFS[+79.966]YEVLTPLK.W		M[+16], S[+80]	934.129	3	2800.37	2800.36	0	5.5	17	NRagged	1105.99	1105.99	63.21	20.71	2376	>sp|P02817|AMELX_BOVIN Amelogenin, X isoform OS=Bos taurus OX=9913 GN=AMELX PE=1 SV=2	1	hf1_10472_ebo_34_1_261219.ScanId;v=1;d1=21104.21104.3	controllerType=0 controllerNumber=1 scan=21104	43.9137
28055:3	1	S.M[+15.995]PLPPHPGHPGYINFS[+79.966]YEVLTPLK.W		M[+16], S[+80]	934.129	3	2800.37	2800.36	0	5.9	17	NRagged	1112.35	1112.35	44.53	20.71	2376	>sp|P02817|AMELX_BOVIN Amelogenin, X isoform OS=Bos taurus OX=9913 GN=AMELX PE=1 SV=2	1	hf1_10472_ebo_34_1_261219.ScanId;v=1;d1=21307.21307.3	controllerType=0 controllerNumber=1 scan=21307	44.2587
30029:3	1	S.MPLPPHPGHPGYIN[+0.984]FS[+79.966]YEVLTPLK.W		N[+1], S[+80]	929.126	3	2785.36	2785.35	0	6	17	NRagged	1139.88	1139.88	566.3	20.71	2376	>sp|P02817|AMELX_BOVIN Amelogenin, X isoform OS=Bos taurus OX=9913 GN=AMELX PE=1 SV=2	1	hf1_10472_ebo_34_1_261219.ScanId;v=1;d1=22624.22624.3	controllerType=0 controllerNumber=1 scan=22624	46.52
30325:3	1	S.MPLPPHPGHPGYIN[+0.984]FS[+79.966]YEVLTPLK.W		N[+1], S[+80]	929.125	3	2785.36	2785.35	0	5	17	NRagged	1190.54	1190.54	559.65	21.71	2376	>sp|P02817|AMELX_BOVIN Amelogenin, X isoform OS=Bos taurus OX=9913 GN=AMELX PE=1 SV=2	1	hf1_10472_ebo_34_1_261219.ScanId;v=1;d1=22822.22822.3	controllerType=0 controllerNumber=1 scan=22822	46.8615
48952:3	1	S.MPLPPHPGHPGY[+15.995]INFSY[+31.990]EVLTP[+31.990]LK.W		P[+32], Y[+16][+32]	928.798	3	2784.38	2784.37	0	3	17	NRagged	3.2	3.2	0	1.48	2376	>sp|P02817|AMELX_BOVIN Amelogenin, X isoform OS=Bos taurus OX=9913 GN=AMELX PE=1 SV=2	1	hf1_10472_ebo_34_1_261219.ScanId;v=1;d1=35732.35732.3	controllerType=0 controllerNumber=1 scan=35732	71.3064
49646:4	1	S.MPLP[+15.995]PHPGHP[+31.990]GYINF[+31.990]SYEVLTPLK.W		F[+32], P[+16][+32]	696.849	4	2784.38	2784.37	0	1.9	17	NRagged	11.04	11.04	0	1.84	2376	>sp|P02817|AMELX_BOVIN Amelogenin, X isoform OS=Bos taurus OX=9913 GN=AMELX PE=1 SV=2	1	hf1_10472_ebo_34_1_261219.ScanId;v=1;d1=36366.36366.4	controllerType=0 controllerNumber=1 scan=36366	72.8396
26223:3	1	S.MP[+15.995]LPPHPGHPGYINFS[+79.966]Y[+31.990]EVLTPLK.W		P[+16], S[+80], Y[+32]	944.793	3	2832.37	2832.35	0	6.9	17	NRagged	11.71	11.71	4	1.01	2376	>sp|P02817|AMELX_BOVIN Amelogenin, X isoform OS=Bos taurus OX=9913 GN=AMELX PE=1 SV=2	1	hf1_10472_ebo_34_1_261219.ScanId;v=1;d1=20046.20046.2	controllerType=0 controllerNumber=1 scan=20046	42.1294
47868:4	1	S.MPLP[+15.995]PHPGHP[+31.990]GYINF[+31.990]SYEVLTPLK.W		F[+32], P[+16][+32]	696.847	4	2784.37	2784.37	0	-1	17	NRagged	21.4	21.4	0	1.21	2376	>sp|P02817|AMELX_BOVIN Amelogenin, X isoform OS=Bos taurus OX=9913 GN=AMELX PE=1 SV=2	1	hf1_10472_ebo_34_1_261219.ScanId;v=1;d1=34785.34785.4	controllerType=0 controllerNumber=1 scan=34785	69.0576
28627:5	1	S.MP[+15.995]LPPHPGHPGYIN[+0.984]FS[+79.966]YEVLTPLK.W		N[+1], P[+16], S[+80]	561.077	5	2801.36	2801.34	0	5.7	17	NRagged	35.22	35.22	5.8	0.46	2376	>sp|P02817|AMELX_BOVIN Amelogenin, X isoform OS=Bos taurus OX=9913 GN=AMELX PE=1 SV=2	1	hf1_10472_ebo_34_1_261219.ScanId;v=1;d1=21689.21689.2	controllerType=0 controllerNumber=1 scan=21689	44.9078
49616:3	1	S.M[+15.995]PLPPHPGHPGYIN[+0.984]FS[+79.966]YEVLTPLK.W		M[+16], N[+1], S[+80]	934.46	3	2801.36	2801.34	0	8.6	17	NRagged	45.96	45.96	25.54	2.67	2376	>sp|P02817|AMELX_BOVIN Amelogenin, X isoform OS=Bos taurus OX=9913 GN=AMELX PE=1 SV=2	1	hf1_10472_ebo_34_1_261219.ScanId;v=1;d1=36337.36337.3	controllerType=0 controllerNumber=1 scan=36337	72.7718
49495:3	1	S.MPLPPHPGHP[+31.990]GY[+31.990]INF[+15.995]SYEVLTPLK.W		F[+16], P[+32], Y[+32]	928.795	3	2784.37	2784.37	0	0	17	NRagged	48.89	48.89	0	2.59	2376	>sp|P02817|AMELX_BOVIN Amelogenin, X isoform OS=Bos taurus OX=9913 GN=AMELX PE=1 SV=2	1	hf1_10472_ebo_34_1_261219.ScanId;v=1;d1=36219.36219.3	controllerType=0 controllerNumber=1 scan=36219	72.4677
46614:4	1	S.MPLP[+15.995]PHPGHPGY[+31.990]INF[+31.990]SYEVLTPLK.W		F[+32], P[+16], Y[+32]	696.848	4	2784.37	2784.37	0	0.5	17	NRagged	53.02	53.02	0	2.31	2376	>sp|P02817|AMELX_BOVIN Amelogenin, X isoform OS=Bos taurus OX=9913 GN=AMELX PE=1 SV=2	1	hf1_10472_ebo_34_1_261219.ScanId;v=1;d1=33692.33692.4	controllerType=0 controllerNumber=1 scan=33692	66.4893
49488:4	1	S.MPLPPHPGHP[+31.990]GY[+31.990]INF[+15.995]SYEVLTPLK.W		F[+16], P[+32], Y[+32]	696.849	4	2784.38	2784.37	0	2	17	NRagged	58.27	58.27	0	2.35	2376	>sp|P02817|AMELX_BOVIN Amelogenin, X isoform OS=Bos taurus OX=9913 GN=AMELX PE=1 SV=2	1	hf1_10472_ebo_34_1_261219.ScanId;v=1;d1=36210.36210.4	controllerType=0 controllerNumber=1 scan=36210	72.4412
47689:4	1	S.MPLP[+15.995]PHPGHP[+31.990]GYINF[+31.990]SYEVLTPLK.W		F[+32], P[+16][+32]	696.846	4	2784.36	2784.37	0	-2.7	17	NRagged	64.51	64.51	0	2.31	2376	>sp|P02817|AMELX_BOVIN Amelogenin, X isoform OS=Bos taurus OX=9913 GN=AMELX PE=1 SV=2	1	hf1_10472_ebo_34_1_261219.ScanId;v=1;d1=34632.34632.4	controllerType=0 controllerNumber=1 scan=34632	68.7099
00010:3	1	S.MP[+15.995]LPPHPGHPGYIN[+0.984]FS[+79.966]YEVLTPLK.W		N[+1], P[+16], S[+80]	934.461	3	2801.37	2801.34	0	9.4	17	NRagged	72.9	72.9	4	2.77	2376	>sp|P02817|AMELX_BOVIN Amelogenin, X isoform OS=Bos taurus OX=9913 GN=AMELX PE=1 SV=2	1	hf1_10472_ebo_34_1_261219.ScanId;v=1;d1=106.106.3	controllerType=0 controllerNumber=1 scan=106	0.5392
28466:4	1	S.MP[+15.995]LPPHPGHPGY[+31.990]INFS[+79.966]YEVLTPLK.W		P[+16], S[+80], Y[+32]	708.842	4	2832.35	2832.35	0	0.2	17	NRagged	73.32	73.32	5.8	0.57	2376	>sp|P02817|AMELX_BOVIN Amelogenin, X isoform OS=Bos taurus OX=9913 GN=AMELX PE=1 SV=2	1	hf1_10472_ebo_34_1_261219.ScanId;v=1;d1=21578.21578.4	controllerType=0 controllerNumber=1 scan=21578	44.7173
49160:4	1	S.MPLP[+15.995]PHPGHPGY[+31.990]INF[+31.990]SYEVLTPLK.W		F[+32], P[+16], Y[+32]	696.849	4	2784.37	2784.37	0	1.6	17	NRagged	84.71	84.71	0	2.35	2376	>sp|P02817|AMELX_BOVIN Amelogenin, X isoform OS=Bos taurus OX=9913 GN=AMELX PE=1 SV=2	1	hf1_10472_ebo_34_1_261219.ScanId;v=1;d1=35912.35912.4	controllerType=0 controllerNumber=1 scan=35912	71.7088
45820:3	1	S.MP[+15.995]LPPHPGHPGYIN[+0.984]FS[+79.966]YEVLTPLK.W		N[+1], P[+16], S[+80]	934.461	3	2801.37	2801.34	0	9.7	17	NRagged	86.07	86.07	4	2.44	2376	>sp|P02817|AMELX_BOVIN Amelogenin, X isoform OS=Bos taurus OX=9913 GN=AMELX PE=1 SV=2	1	hf1_10472_ebo_34_1_261219.ScanId;v=1;d1=32983.32983.3	controllerType=0 controllerNumber=1 scan=32983	64.8366
46435:4	1	S.MPLP[+15.995]P[+31.990]HPGHPGYINF[+31.990]SYEVLTPLK.W		F[+32], P[+16][+32]	696.848	4	2784.37	2784.37	0	0.6	17	NRagged	86.66	86.66	0	2.46	2376	>sp|P02817|AMELX_BOVIN Amelogenin, X isoform OS=Bos taurus OX=9913 GN=AMELX PE=1 SV=2	1	hf1_10472_ebo_34_1_261219.ScanId;v=1;d1=33534.33534.4	controllerType=0 controllerNumber=1 scan=33534	66.1214
48631:4	1	S.MPLP[+31.990]P[+31.990]HPGHPGYINF[+15.995]SYEVLTPLK.W		F[+16], P[+32]*2	696.848	4	2784.37	2784.37	0	0.7	17	NRagged	89.75	89.75	0	2.36	2376	>sp|P02817|AMELX_BOVIN Amelogenin, X isoform OS=Bos taurus OX=9913 GN=AMELX PE=1 SV=2	1	hf1_10472_ebo_34_1_261219.ScanId;v=1;d1=35446.35446.4	controllerType=0 controllerNumber=1 scan=35446	70.6206
26650:4	1	S.MP[+15.995]LPPHPGHP[+31.990]GYINFS[+79.966]YEVLTPLK.W		P[+16][+32], S[+80]	708.849	4	2832.37	2832.35	0	9.9	17	NRagged	90.14	90.14	0	1.1	2376	>sp|P02817|AMELX_BOVIN Amelogenin, X isoform OS=Bos taurus OX=9913 GN=AMELX PE=1 SV=2	1	hf1_10472_ebo_34_1_261219.ScanId;v=1;d1=20332.20332.4	controllerType=0 controllerNumber=1 scan=20332	42.6111
48980:4	1	S.MPLPP[+15.995]HPGHPGY[+31.990]INF[+31.990]SYEVLTPLK.W		F[+32], P[+16], Y[+32]	696.849	4	2784.38	2784.37	0	2	17	NRagged	99.67	99.67	0	2.39	2376	>sp|P02817|AMELX_BOVIN Amelogenin, X isoform OS=Bos taurus OX=9913 GN=AMELX PE=1 SV=2	1	hf1_10472_ebo_34_1_261219.ScanId;v=1;d1=35755.35755.4	controllerType=0 controllerNumber=1 scan=35755	71.356
48825:4	1	S.MPLP[+15.995]PHPGHPGY[+31.990]INF[+31.990]SYEVLTPLK.W		F[+32], P[+16], Y[+32]	696.847	4	2784.37	2784.37	0	-0.7	17	NRagged	103.37	103.37	0	2.36	2376	>sp|P02817|AMELX_BOVIN Amelogenin, X isoform OS=Bos taurus OX=9913 GN=AMELX PE=1 SV=2	1	hf1_10472_ebo_34_1_261219.ScanId;v=1;d1=35615.35615.4	controllerType=0 controllerNumber=1 scan=35615	71.0171
28417:4	1	S.M[+15.995]PLPPHPGHPGYINFS[+79.966]Y[+31.990]EVLTPLK.W		M[+16], S[+80], Y[+32]	708.841	4	2832.34	2832.35	0	-1.5	17	NRagged	111.19	76	0	0.55	2376	>sp|P02817|AMELX_BOVIN Amelogenin, X isoform OS=Bos taurus OX=9913 GN=AMELX PE=1 SV=2	1	hf1_10472_ebo_34_1_261219.ScanId;v=1;d1=21546.21546.4	controllerType=0 controllerNumber=1 scan=21546	44.6615
29306:4	1	S.MPLP[+31.990]PHPGHPGYIN[+0.984]F[+31.990]SYEVLTPLK.W		F[+32], N[+1], P[+32]	693.093	4	2769.35	2769.36	0	-2.5	17	NRagged	114.89	114.89	0.6	0.55	2376	>sp|P02817|AMELX_BOVIN Amelogenin, X isoform OS=Bos taurus OX=9913 GN=AMELX PE=1 SV=2	1	hf1_10472_ebo_34_1_261219.ScanId;v=1;d1=22145.22145.4	controllerType=0 controllerNumber=1 scan=22145	45.6873
48037:4	1	S.MPLP[+15.995]PHPGHPGY[+31.990]INF[+31.990]SYEVLTPLK.W		F[+32], P[+16], Y[+32]	696.848	4	2784.37	2784.37	0	0.1	17	NRagged	115.45	115.45	0	2.46	2376	>sp|P02817|AMELX_BOVIN Amelogenin, X isoform OS=Bos taurus OX=9913 GN=AMELX PE=1 SV=2	1	hf1_10472_ebo_34_1_261219.ScanId;v=1;d1=34934.34934.4	controllerType=0 controllerNumber=1 scan=34934	69.4088
25765:3	1	S.MP[+15.995]LPPHPGHPGY[+15.995]INFS[+79.966]YEVLTPLK.W		P[+16], S[+80], Y[+16]	939.461	3	2816.37	2816.35	0	5.6	17	NRagged	121.87	121.87	0	2.4	2376	>sp|P02817|AMELX_BOVIN Amelogenin, X isoform OS=Bos taurus OX=9913 GN=AMELX PE=1 SV=2	1	hf1_10472_ebo_34_1_261219.ScanId;v=1;d1=19744.19744.4	controllerType=0 controllerNumber=1 scan=19744	41.6223
46416:3	1	S.MP[+15.995]LPPHPGHPGYIN[+0.984]FS[+79.966]YEVLTPLK.W		N[+1], P[+16], S[+80]	934.46	3	2801.36	2801.34	0	8.4	17	NRagged	149.06	149.06	4	3.4	2376	>sp|P02817|AMELX_BOVIN Amelogenin, X isoform OS=Bos taurus OX=9913 GN=AMELX PE=1 SV=2	1	hf1_10472_ebo_34_1_261219.ScanId;v=1;d1=33518.33518.3	controllerType=0 controllerNumber=1 scan=33518	66.0801
24794:4	1	S.MP[+15.995]LPPHPGHPGYINFS[+79.966]Y[+15.995]EVLTPLK.W		P[+16], S[+80], Y[+16]	704.848	4	2816.37	2816.35	0	6.1	17	NRagged	179.72	179.72	3.8	3.29	2376	>sp|P02817|AMELX_BOVIN Amelogenin, X isoform OS=Bos taurus OX=9913 GN=AMELX PE=1 SV=2	1	hf1_10472_ebo_34_1_261219.ScanId;v=1;d1=19095.19095.4	controllerType=0 controllerNumber=1 scan=19095	40.5362
48994:3	1	S.MP[+15.995]LPPHPGHPGYIN[+0.984]FS[+79.966]YEVLTPLK.W		N[+1], P[+16], S[+80]	934.461	3	2801.37	2801.34	0	9.6	17	NRagged	197.91	197.91	4	4.03	2376	>sp|P02817|AMELX_BOVIN Amelogenin, X isoform OS=Bos taurus OX=9913 GN=AMELX PE=1 SV=2	1	hf1_10472_ebo_34_1_261219.ScanId;v=1;d1=35767.35767.3	controllerType=0 controllerNumber=1 scan=35767	71.3809
32633:3	1	S.MPLP[+15.995]PHPGHPGYINF[+31.990]SY[+31.990]EVLTPLK.W		F[+32], P[+16], Y[+32]	928.796	3	2784.37	2784.37	0	1.4	17	NRagged	202.15	202.15	9.19	3.42	2376	>sp|P02817|AMELX_BOVIN Amelogenin, X isoform OS=Bos taurus OX=9913 GN=AMELX PE=1 SV=2	1	hf1_10472_ebo_34_1_261219.ScanId;v=1;d1=24342.24342.3	controllerType=0 controllerNumber=1 scan=24342	49.482
29022:4	1	S.MP[+31.990]LPPHPGHPGYIN[+0.984]FS[+79.966]YEVLTPLK.W		N[+1], P[+32], S[+80]	705.095	4	2817.36	2817.34	0	8.5	17	NRagged	216.56	182.99	1.8	2.91	2376	>sp|P02817|AMELX_BOVIN Amelogenin, X isoform OS=Bos taurus OX=9913 GN=AMELX PE=1 SV=2	1	hf1_10472_ebo_34_1_261219.ScanId;v=1;d1=21957.21957.4	controllerType=0 controllerNumber=1 scan=21957	45.3645
29063:4	1	S.MP[+15.995]LPPHPGHPGYINF[+15.995]S[+79.966]YEVLTPLK.W		F[+16], P[+16], S[+80]	704.845	4	2816.36	2816.35	0	2.8	17	NRagged	227.97	227.97	3.8	3.67	2376	>sp|P02817|AMELX_BOVIN Amelogenin, X isoform OS=Bos taurus OX=9913 GN=AMELX PE=1 SV=2	1	hf1_10472_ebo_34_1_261219.ScanId;v=1;d1=21984.21984.4	controllerType=0 controllerNumber=1 scan=21984	45.4134
24757:4	1	S.MP[+15.995]LPPHPGHPGYINFS[+79.966]Y[+15.995]EVLTPLK.W		P[+16], S[+80], Y[+16]	704.848	4	2816.37	2816.35	0	6.5	17	NRagged	264.36	264.36	3.8	5.41	2376	>sp|P02817|AMELX_BOVIN Amelogenin, X isoform OS=Bos taurus OX=9913 GN=AMELX PE=1 SV=2	1	hf1_10472_ebo_34_1_261219.ScanId;v=1;d1=19068.19068.4	controllerType=0 controllerNumber=1 scan=19068	40.4884
26490:4	1	S.MP[+15.995]LPPHPGHPGYINFS[+79.966]Y[+15.995]EVLTPLK.W		P[+16], S[+80], Y[+16]	704.848	4	2816.37	2816.35	0	6.3	17	NRagged	295.07	295.07	14.95	6.05	2376	>sp|P02817|AMELX_BOVIN Amelogenin, X isoform OS=Bos taurus OX=9913 GN=AMELX PE=1 SV=2	1	hf1_10472_ebo_34_1_261219.ScanId;v=1;d1=20228.20228.4	controllerType=0 controllerNumber=1 scan=20228	42.4362
30785:3	1	S.MPLPPHPGHP[+15.995]GYINF[+15.995]SY[+31.990]EVLTPLK.W		F[+16], P[+16], Y[+32]	923.457	3	2768.36	2768.38	0	-7.3	17	NRagged	304.4	304.4	2	4.87	2376	>sp|P02817|AMELX_BOVIN Amelogenin, X isoform OS=Bos taurus OX=9913 GN=AMELX PE=1 SV=2	1	hf1_10472_ebo_34_1_261219.ScanId;v=1;d1=23119.23119.3	controllerType=0 controllerNumber=1 scan=23119	47.379
24637:3	1	S.M[+15.995]PLPPHPGHPGYINFS[+79.966]YEVLTP[+15.995]LK.W		M[+16], P[+16], S[+80]	939.459	3	2816.36	2816.35	0	3.7	17	NRagged	369.99	369.99	11.02	7.49	2376	>sp|P02817|AMELX_BOVIN Amelogenin, X isoform OS=Bos taurus OX=9913 GN=AMELX PE=1 SV=2	1	hf1_10472_ebo_34_1_261219.ScanId;v=1;d1=18990.18990.3	controllerType=0 controllerNumber=1 scan=18990	40.3596
28760:4	1	S.M[+15.995]PLP[+15.995]PHPGHPGYINFS[+79.966]YEVLTPLK.W		M[+16], P[+16], S[+80]	704.846	4	2816.36	2816.35	0	4.3	17	NRagged	440.08	440.08	4	7.47	2376	>sp|P02817|AMELX_BOVIN Amelogenin, X isoform OS=Bos taurus OX=9913 GN=AMELX PE=1 SV=2	1	hf1_10472_ebo_34_1_261219.ScanId;v=1;d1=21781.21781.4	controllerType=0 controllerNumber=1 scan=21781	45.0654
27575:4	1	S.MP[+15.995]LPPHPGH[+15.995]PGYINFS[+79.966]YEVLTPLK.W		H[+16], P[+16], S[+80]	704.845	4	2816.36	2816.35	0	2.6	17	NRagged	482.19	482.19	3.8	7.06	2376	>sp|P02817|AMELX_BOVIN Amelogenin, X isoform OS=Bos taurus OX=9913 GN=AMELX PE=1 SV=2	1	hf1_10472_ebo_34_1_261219.ScanId;v=1;d1=20969.20969.4	controllerType=0 controllerNumber=1 scan=20969	43.683
26243:3	1	S.M[+15.995]PLPPHPGHPGYINFS[+79.966]YEVLTP[+15.995]LK.W		M[+16], P[+16], S[+80]	939.461	3	2816.37	2816.35	0	5.5	17	NRagged	482.54	482.54	8.35	8.01	2376	>sp|P02817|AMELX_BOVIN Amelogenin, X isoform OS=Bos taurus OX=9913 GN=AMELX PE=1 SV=2	1	hf1_10472_ebo_34_1_261219.ScanId;v=1;d1=20060.20060.3	controllerType=0 controllerNumber=1 scan=20060	42.153
25039:3	1	S.M[+15.995]PLPPHPGHPGYINFS[+79.966]YEVLTP[+15.995]LK.W		M[+16], P[+16], S[+80]	939.461	3	2816.37	2816.35	0	5.6	17	NRagged	484.48	484.48	6.66	8.01	2376	>sp|P02817|AMELX_BOVIN Amelogenin, X isoform OS=Bos taurus OX=9913 GN=AMELX PE=1 SV=2	1	hf1_10472_ebo_34_1_261219.ScanId;v=1;d1=19253.19253.3	controllerType=0 controllerNumber=1 scan=19253	40.8026
27034:3	1	S.M[+15.995]PLPPHPGHPGYIN[+0.984]FS[+79.966]YEVLTPLK.W		M[+16], N[+1], S[+80]	934.459	3	2801.36	2801.34	0	7.8	17	NRagged	509.33	509.33	6	8.15	2376	>sp|P02817|AMELX_BOVIN Amelogenin, X isoform OS=Bos taurus OX=9913 GN=AMELX PE=1 SV=2	1	hf1_10472_ebo_34_1_261219.ScanId;v=1;d1=20597.20597.4	controllerType=0 controllerNumber=1 scan=20597	43.0588
27275:4	1	S.MP[+15.995]LPPHPGH[+15.995]PGYINFS[+79.966]YEVLTPLK.W		H[+16], P[+16], S[+80]	704.847	4	2816.36	2816.35	0	4.5	17	NRagged	524.52	524.52	3.17	8.2	2376	>sp|P02817|AMELX_BOVIN Amelogenin, X isoform OS=Bos taurus OX=9913 GN=AMELX PE=1 SV=2	1	hf1_10472_ebo_34_1_261219.ScanId;v=1;d1=20757.20757.4	controllerType=0 controllerNumber=1 scan=20757	43.3284
27881:4	1	S.M[+15.995]PLPPHP[+15.995]GHPGYINFS[+79.966]YEVLTPLK.W		M[+16], P[+16], S[+80]	704.845	4	2816.36	2816.35	0	1.6	17	NRagged	532.99	532.99	7.52	7.28	2376	>sp|P02817|AMELX_BOVIN Amelogenin, X isoform OS=Bos taurus OX=9913 GN=AMELX PE=1 SV=2	1	hf1_10472_ebo_34_1_261219.ScanId;v=1;d1=21179.21179.4	controllerType=0 controllerNumber=1 scan=21179	44.0414
26906:4	1	S.M[+15.995]PLPPHPGHPGYINF[+15.995]S[+79.966]YEVLTPLK.W		F[+16], M[+16], S[+80]	704.846	4	2816.36	2816.35	0	4.4	17	NRagged	550.09	550.09	3.8	8.33	2376	>sp|P02817|AMELX_BOVIN Amelogenin, X isoform OS=Bos taurus OX=9913 GN=AMELX PE=1 SV=2	1	hf1_10472_ebo_34_1_261219.ScanId;v=1;d1=20505.20505.4	controllerType=0 controllerNumber=1 scan=20505	42.9047
30178:3	1	S.M[+15.995]PLPPHPGHPGYIN[+0.984]FS[+79.966]YEVLTPLK.W		M[+16], N[+1], S[+80]	934.458	3	2801.36	2801.34	0	6.3	17	NRagged	574.91	563.8	5.09	9.04	2376	>sp|P02817|AMELX_BOVIN Amelogenin, X isoform OS=Bos taurus OX=9913 GN=AMELX PE=1 SV=2	1	hf1_10472_ebo_34_1_261219.ScanId;v=1;d1=22723.22723.3	controllerType=0 controllerNumber=1 scan=22723	46.6907
29448:4	1	S.MPLPPHPGH[+15.995]PGYIN[+0.984]FS[+79.966]YEVLTPLK.W		H[+16], N[+1], S[+80]	701.094	4	2801.36	2801.34	0	5	17	NRagged	627.65	563.98	4.8	9.7	2376	>sp|P02817|AMELX_BOVIN Amelogenin, X isoform OS=Bos taurus OX=9913 GN=AMELX PE=1 SV=2	1	hf1_10472_ebo_34_1_261219.ScanId;v=1;d1=22241.22241.4	controllerType=0 controllerNumber=1 scan=22241	45.8532
28338:2	1	S.M[+15.995]PLPPHPGHPGYIN[+0.984]FS[+79.966]YEVLTPLK.W		M[+16], N[+1], S[+80]	1401.19	2	2801.37	2801.34	0	8.7	17	NRagged	665.26	590.93	48.85	10.37	2376	>sp|P02817|AMELX_BOVIN Amelogenin, X isoform OS=Bos taurus OX=9913 GN=AMELX PE=1 SV=2	1	hf1_10472_ebo_34_1_261219.ScanId;v=1;d1=21492.21492.2	controllerType=0 controllerNumber=1 scan=21492	44.5691
28747:4	1	S.MP[+15.995]LPPHPGHPGYIN[+0.984]FS[+79.966]YEVLTPLK.W		N[+1], P[+16], S[+80]	701.096	4	2801.36	2801.34	0	7	17	NRagged	673.16	640.99	5.8	11.37	2376	>sp|P02817|AMELX_BOVIN Amelogenin, X isoform OS=Bos taurus OX=9913 GN=AMELX PE=1 SV=2	1	hf1_10472_ebo_34_1_261219.ScanId;v=1;d1=21773.21773.4	controllerType=0 controllerNumber=1 scan=21773	45.0533
30449:3	1	S.M[+15.995]PLPPHP[+15.995]GHPGYINFS[+79.966]YEVLTPLK.W		M[+16], P[+16], S[+80]	939.462	3	2816.37	2816.35	0	6.9	17	NRagged	675.65	675.65	17.86	11.76	2376	>sp|P02817|AMELX_BOVIN Amelogenin, X isoform OS=Bos taurus OX=9913 GN=AMELX PE=1 SV=2	1	hf1_10472_ebo_34_1_261219.ScanId;v=1;d1=22903.22903.3	controllerType=0 controllerNumber=1 scan=22903	47.0023
27281:4	1	S.MP[+15.995]LPPHPGHPGYIN[+0.984]FS[+79.966]YEVLTPLK.W		N[+1], P[+16], S[+80]	701.095	4	2801.36	2801.34	0	6.2	17	NRagged	683.42	603.52	5.8	11.32	2376	>sp|P02817|AMELX_BOVIN Amelogenin, X isoform OS=Bos taurus OX=9913 GN=AMELX PE=1 SV=2	1	hf1_10472_ebo_34_1_261219.ScanId;v=1;d1=20762.20762.4	controllerType=0 controllerNumber=1 scan=20762	43.3345
28452:4	1	S.MP[+15.995]LPPHPGHPGYIN[+0.984]FS[+79.966]YEVLTPLK.W		N[+1], P[+16], S[+80]	701.095	4	2801.36	2801.34	0	6.8	17	NRagged	709.12	707.9	4	12.37	2376	>sp|P02817|AMELX_BOVIN Amelogenin, X isoform OS=Bos taurus OX=9913 GN=AMELX PE=1 SV=2	1	hf1_10472_ebo_34_1_261219.ScanId;v=1;d1=21571.21571.4	controllerType=0 controllerNumber=1 scan=21571	44.7069
28006:3	1	S.M[+15.995]PLPPHP[+15.995]GHPGYINFS[+79.966]YEVLTPLK.W		M[+16], P[+16], S[+80]	939.457	3	2816.36	2816.35	0	1.7	17	NRagged	711.31	711.31	11.17	12.1	2376	>sp|P02817|AMELX_BOVIN Amelogenin, X isoform OS=Bos taurus OX=9913 GN=AMELX PE=1 SV=2	1	hf1_10472_ebo_34_1_261219.ScanId;v=1;d1=21269.21269.3	controllerType=0 controllerNumber=1 scan=21269	44.1928
29884:3	1	S.MP[+15.995]LPPHPGHPGYIN[+0.984]FS[+79.966]YEVLTPLK.W		N[+1], P[+16], S[+80]	934.458	3	2801.36	2801.34	0	6.9	17	NRagged	744.53	692.24	16.8	12.76	2376	>sp|P02817|AMELX_BOVIN Amelogenin, X isoform OS=Bos taurus OX=9913 GN=AMELX PE=1 SV=2	1	hf1_10472_ebo_34_1_261219.ScanId;v=1;d1=22525.22525.3	controllerType=0 controllerNumber=1 scan=22525	46.3488
28651:2	1	S.M[+15.995]PLPPHPGHPGYIN[+0.984]FS[+79.966]YEVLTPLK.W		M[+16], N[+1], S[+80]	1401.19	2	2801.37	2801.34	0	9.5	17	NRagged	793.76	721.52	53.81	12.37	2376	>sp|P02817|AMELX_BOVIN Amelogenin, X isoform OS=Bos taurus OX=9913 GN=AMELX PE=1 SV=2	1	hf1_10472_ebo_34_1_261219.ScanId;v=1;d1=21705.21705.2	controllerType=0 controllerNumber=1 scan=21705	44.9348
29579:3	1	S.MPLPPHPGHPGY[+15.995]IN[+0.984]FS[+79.966]YEVLTPLK.W		N[+1], S[+80], Y[+16]	934.459	3	2801.36	2801.34	0	7.4	17	NRagged	813.64	791.08	12.85	14.76	2376	>sp|P02817|AMELX_BOVIN Amelogenin, X isoform OS=Bos taurus OX=9913 GN=AMELX PE=1 SV=2	1	hf1_10472_ebo_34_1_261219.ScanId;v=1;d1=22323.22323.3	controllerType=0 controllerNumber=1 scan=22323	45.9967
27369:3	1	S.M[+15.995]PLPPHP[+15.995]GHPGYINFS[+79.966]YEVLTPLK.W		M[+16], P[+16], S[+80]	939.459	3	2816.36	2816.35	0	4.2	17	NRagged	898.94	898.94	4.56	15.53	2376	>sp|P02817|AMELX_BOVIN Amelogenin, X isoform OS=Bos taurus OX=9913 GN=AMELX PE=1 SV=2	1	hf1_10472_ebo_34_1_261219.ScanId;v=1;d1=20822.20822.3	controllerType=0 controllerNumber=1 scan=20822	43.4344
28978:3	1	S.M[+15.995]PLPPHPGHPGYIN[+0.984]FS[+79.966]YEVLTPLK.W		M[+16], N[+1], S[+80]	934.46	3	2801.37	2801.34	0	9	17	NRagged	915.28	863.25	7.14	15.89	2376	>sp|P02817|AMELX_BOVIN Amelogenin, X isoform OS=Bos taurus OX=9913 GN=AMELX PE=1 SV=2	1	hf1_10472_ebo_34_1_261219.ScanId;v=1;d1=21928.21928.3	controllerType=0 controllerNumber=1 scan=21928	45.3153
27055:3	1	S.M[+15.995]PLPPHPGHPGY[+15.995]INFS[+79.966]YEVLTPLK.W		M[+16], S[+80], Y[+16]	939.46	3	2816.37	2816.35	0	5.3	17	NRagged	921.63	921.63	0.21	16.71	2376	>sp|P02817|AMELX_BOVIN Amelogenin, X isoform OS=Bos taurus OX=9913 GN=AMELX PE=1 SV=2	1	hf1_10472_ebo_34_1_261219.ScanId;v=1;d1=20615.20615.3	controllerType=0 controllerNumber=1 scan=20615	43.087
28370:3	1	S.M[+15.995]PLPPHPGHPGYIN[+0.984]FS[+79.966]YEVLTPLK.W		M[+16], N[+1], S[+80]	934.458	3	2801.36	2801.34	0	7	17	NRagged	1081.24	1067.22	53.52	19.76	2376	>sp|P02817|AMELX_BOVIN Amelogenin, X isoform OS=Bos taurus OX=9913 GN=AMELX PE=1 SV=2	1	hf1_10472_ebo_34_1_261219.ScanId;v=1;d1=21516.21516.3	controllerType=0 controllerNumber=1 scan=21516	44.6122
28667:3	1	S.M[+15.995]PLPPHPGHPGYIN[+0.984]FS[+79.966]YEVLTPLK.W		M[+16], N[+1], S[+80]	934.458	3	2801.36	2801.34	0	6.6	17	NRagged	1099	1086.09	57.88	19.76	2376	>sp|P02817|AMELX_BOVIN Amelogenin, X isoform OS=Bos taurus OX=9913 GN=AMELX PE=1 SV=2	1	hf1_10472_ebo_34_1_261219.ScanId;v=1;d1=21718.21718.3	controllerType=0 controllerNumber=1 scan=21718	44.9599
00145:4	1	S.MP[+15.995]LP[+15.995]PHPGHPGY[+31.990]INF[+31.990]SYEVLTPLK.W		F[+32], P[+16]*2, Y[+32]	700.847	4	2800.37	2800.37	0	0.1	17	NRagged	35.16	35.16	0	1.52	2376	>sp|P02817|AMELX_BOVIN Amelogenin, X isoform OS=Bos taurus OX=9913 GN=AMELX PE=1 SV=2	1	hf1_10472_ebo_34_1_261219.ScanId;v=1;d1=633.633.4	controllerType=0 controllerNumber=1 scan=633	3.3304
00489:4	1	S.MP[+15.995]LP[+15.995]PHPGHPGY[+31.990]INF[+31.990]SYEVLTPLK.W		F[+32], P[+16]*2, Y[+32]	700.846	4	2800.36	2800.37	0	-0.5	17	NRagged	43.58	43.58	0	2.42	2376	>sp|P02817|AMELX_BOVIN Amelogenin, X isoform OS=Bos taurus OX=9913 GN=AMELX PE=1 SV=2	1	hf1_10472_ebo_34_1_261219.ScanId;v=1;d1=2204.2204.4	controllerType=0 controllerNumber=1 scan=2204	11.8366
48516:3	1	S.MPLPPHPGHP[+31.990]GY[+31.990]IN[+0.984]F[+15.995]SYEVLTPLK.W		F[+16], N[+1], P[+32], Y[+32]	929.129	3	2785.37	2785.35	0	6.8	17	NRagged	52.69	52.69	0	2.72	2376	>sp|P02817|AMELX_BOVIN Amelogenin, X isoform OS=Bos taurus OX=9913 GN=AMELX PE=1 SV=2	1	hf1_10472_ebo_34_1_261219.ScanId;v=1;d1=35344.35344.3	controllerType=0 controllerNumber=1 scan=35344	70.3757
46665:4	1	S.MPLP[+15.995]PHPGHP[+31.990]GYIN[+0.984]F[+31.990]SYEVLTPLK.W		F[+32], N[+1], P[+16][+32]	697.098	4	2785.37	2785.35	0	5.9	17	NRagged	59.57	59.57	0	2.56	2376	>sp|P02817|AMELX_BOVIN Amelogenin, X isoform OS=Bos taurus OX=9913 GN=AMELX PE=1 SV=2	1	hf1_10472_ebo_34_1_261219.ScanId;v=1;d1=33735.33735.4	controllerType=0 controllerNumber=1 scan=33735	66.5889
50320:3	1	S.MP[+15.995]LPPHPGHP[+31.990]GY[+31.990]INFSY[+15.995]EVLTPLK.W		P[+16][+32], Y[+16][+32]	934.131	3	2800.38	2800.37	0	4.5	17	NRagged	77.64	77.64	0	3.04	2376	>sp|P02817|AMELX_BOVIN Amelogenin, X isoform OS=Bos taurus OX=9913 GN=AMELX PE=1 SV=2	1	hf1_10472_ebo_34_1_261219.ScanId;v=1;d1=36970.36970.3	controllerType=0 controllerNumber=1 scan=36970	74.4877
34003:3	1	S.M[+15.995]PLPPHPGHPGYINF[+15.995]S[+79.966]Y[+31.990]EVLTPLK.W		F[+16], M[+16], S[+80], Y[+32]	950.123	3	2848.36	2848.34	0	5	17	NRagged	86.88	86.88	0.71	1.33	2376	>sp|P02817|AMELX_BOVIN Amelogenin, X isoform OS=Bos taurus OX=9913 GN=AMELX PE=1 SV=2	1	hf1_10472_ebo_34_1_261219.ScanId;v=1;d1=25289.25289.4	controllerType=0 controllerNumber=1 scan=25289	51.1394
48038:4	1	S.MPLP[+15.995]PHPGHPGY[+31.990]IN[+0.984]F[+31.990]SYEVLTPLK.W		F[+32], N[+1], P[+16], Y[+32]	697.099	4	2785.38	2785.35	0	7.8	17	NRagged	93.74	93.74	0	2.58	2376	>sp|P02817|AMELX_BOVIN Amelogenin, X isoform OS=Bos taurus OX=9913 GN=AMELX PE=1 SV=2	1	hf1_10472_ebo_34_1_261219.ScanId;v=1;d1=34934.34934.4	controllerType=0 controllerNumber=1 scan=34934	69.4088
48835:3	1	S.MPLPPHPGHP[+31.990]GY[+31.990]IN[+0.984]F[+15.995]SYEVLTPLK.W		F[+16], N[+1], P[+32], Y[+32]	929.13	3	2785.38	2785.35	0	7.6	17	NRagged	114.08	114.08	0	2.95	2376	>sp|P02817|AMELX_BOVIN Amelogenin, X isoform OS=Bos taurus OX=9913 GN=AMELX PE=1 SV=2	1	hf1_10472_ebo_34_1_261219.ScanId;v=1;d1=35627.35627.2	controllerType=0 controllerNumber=1 scan=35627	71.0481
47201:4	1	S.MPLPPHPGHPGY[+31.990]IN[+0.984]F[+31.990]SY[+15.995]EVLTPLK.W		F[+32], N[+1], Y[+16][+32]	697.099	4	2785.37	2785.35	0	7.1	17	NRagged	117.77	117.77	0	2.68	2376	>sp|P02817|AMELX_BOVIN Amelogenin, X isoform OS=Bos taurus OX=9913 GN=AMELX PE=1 SV=2	1	hf1_10472_ebo_34_1_261219.ScanId;v=1;d1=34201.34201.4	controllerType=0 controllerNumber=1 scan=34201	67.6719
27547:4	1	S.MP[+15.995]LPPHPGHPGY[+31.990]IN[+0.984]FS[+79.966]YEVLTPLK.W		N[+1], P[+16], S[+80], Y[+32]	709.095	4	2833.36	2833.33	0	9	17	NRagged	121.81	78.99	1.4	1.1	2376	>sp|P02817|AMELX_BOVIN Amelogenin, X isoform OS=Bos taurus OX=9913 GN=AMELX PE=1 SV=2	1	hf1_10472_ebo_34_1_261219.ScanId;v=1;d1=20951.20951.4	controllerType=0 controllerNumber=1 scan=20951	43.6529
48683:3	1	S.MPLPPHPGHPGY[+31.990]IN[+0.984]F[+31.990]SY[+15.995]EVLTPLK.W		F[+32], N[+1], Y[+16][+32]	929.13	3	2785.37	2785.35	0	7.2	17	NRagged	122.58	122.58	0	2.95	2376	>sp|P02817|AMELX_BOVIN Amelogenin, X isoform OS=Bos taurus OX=9913 GN=AMELX PE=1 SV=2	1	hf1_10472_ebo_34_1_261219.ScanId;v=1;d1=35492.35492.3	controllerType=0 controllerNumber=1 scan=35492	70.7227
50154:4	1	S.MP[+15.995]LPPHPGH[+15.995]PGY[+31.990]INF[+31.990]SYEVLTPLK.W		F[+32], H[+16], P[+16], Y[+32]	700.849	4	2800.37	2800.37	0	2.9	17	NRagged	145.33	145.33	0	2.55	2376	>sp|P02817|AMELX_BOVIN Amelogenin, X isoform OS=Bos taurus OX=9913 GN=AMELX PE=1 SV=2	1	hf1_10472_ebo_34_1_261219.ScanId;v=1;d1=36819.36819.4	controllerType=0 controllerNumber=1 scan=36819	74.029
00571:4	1	S.MP[+15.995]LPPHPGHP[+31.990]GY[+31.990]INFSY[+15.995]EVLTPLK.W		P[+16][+32], Y[+16][+32]	700.847	4	2800.37	2800.37	0	0	17	NRagged	158.55	158.55	0	3.14	2376	>sp|P02817|AMELX_BOVIN Amelogenin, X isoform OS=Bos taurus OX=9913 GN=AMELX PE=1 SV=2	1	hf1_10472_ebo_34_1_261219.ScanId;v=1;d1=2299.2299.4	controllerType=0 controllerNumber=1 scan=2299	12.1869
29255:5	1	S.MPLPPHPGHPGY[+31.990]IN[+0.984]F[+31.990]SY[+15.995]EVLTPLK.W		F[+32], N[+1], Y[+16][+32]	557.882	5	2785.38	2785.35	0	9.7	17	NRagged	272.89	272.89	0	4.1	2376	>sp|P02817|AMELX_BOVIN Amelogenin, X isoform OS=Bos taurus OX=9913 GN=AMELX PE=1 SV=2	1	hf1_10472_ebo_34_1_261219.ScanId;v=1;d1=22112.22112.5	controllerType=0 controllerNumber=1 scan=22112	45.6309
30553:4	1	S.MPLPPHPGHP[+15.995]GY[+31.990]IN[+0.984]F[+31.990]SYEVLTPLK.W		F[+32], N[+1], P[+16], Y[+32]	697.1	4	2785.38	2785.35	0	8.8	17	NRagged	322.6	322.6	3.66	4.81	2376	>sp|P02817|AMELX_BOVIN Amelogenin, X isoform OS=Bos taurus OX=9913 GN=AMELX PE=1 SV=2	1	hf1_10472_ebo_34_1_261219.ScanId;v=1;d1=22972.22972.6	controllerType=0 controllerNumber=1 scan=22972	47.1223
33408:4	1	S.MPLPPHPGHPGYINFSYEVLTPLKW.Y			723.371	4	2890.46	2890.47	0	-4.8	17	Non	147.52	131.21	131.21	0.57	2376	>sp|P02817|AMELX_BOVIN Amelogenin, X isoform OS=Bos taurus OX=9913 GN=AMELX PE=1 SV=2	1	hf1_10472_ebo_34_1_261219.ScanId;v=1;d1=24877.24877.4	controllerType=0 controllerNumber=1 scan=24877	50.4096
32038:4	1	S.MPLPPHPGHPGYINFSYEVLTPLKW.Y			723.376	4	2890.48	2890.47	0	2.7	17	Non	414.29	405.65	405.65	6.4	2376	>sp|P02817|AMELX_BOVIN Amelogenin, X isoform OS=Bos taurus OX=9913 GN=AMELX PE=1 SV=2	1	hf1_10472_ebo_34_1_261219.ScanId;v=1;d1=23939.23939.6	controllerType=0 controllerNumber=1 scan=23939	48.7857
34001:4	1	S.MPLPPHPGHPGYINFS[+79.966]YEVLTPLKW.Y		S[+80]	743.369	4	2970.45	2970.44	0	3.7	17	Non	257.53	257.53	15.36	4.86	2376	>sp|P02817|AMELX_BOVIN Amelogenin, X isoform OS=Bos taurus OX=9913 GN=AMELX PE=1 SV=2	1	hf1_10472_ebo_34_1_261219.ScanId;v=1;d1=25287.25287.4	controllerType=0 controllerNumber=1 scan=25287	51.1336
35873:3	1	S.MPLPPHPGHPGYINFS[+79.966]YEVLTPLKW.Y		S[+80]	990.818	3	2970.44	2970.44	0	-0.9	17	Non	318.06	318.06	74.4	4.97	2376	>sp|P02817|AMELX_BOVIN Amelogenin, X isoform OS=Bos taurus OX=9913 GN=AMELX PE=1 SV=2	1	hf1_10472_ebo_34_1_261219.ScanId;v=1;d1=26523.26523.3	controllerType=0 controllerNumber=1 scan=26523	53.324
30933:4	1	S.MP[+15.995]LPPHPGHPGYINFSYEVLTPLKW.Y		P[+16]	727.377	4	2906.49	2906.47	0	5.6	17	Non	376.86	369.54	5.8	6.97	2376	>sp|P02817|AMELX_BOVIN Amelogenin, X isoform OS=Bos taurus OX=9913 GN=AMELX PE=1 SV=2	1	hf1_10472_ebo_34_1_261219.ScanId;v=1;d1=23211.23211.4	controllerType=0 controllerNumber=1 scan=23211	47.5368
30959:4	1	S.MP[+15.995]LPPHPGHPGYINFSYEVLTPLKW.Y		P[+16]	727.377	4	2906.49	2906.47	0	5.3	17	Non	402.19	402.19	5.8	7.24	2376	>sp|P02817|AMELX_BOVIN Amelogenin, X isoform OS=Bos taurus OX=9913 GN=AMELX PE=1 SV=2	1	hf1_10472_ebo_34_1_261219.ScanId;v=1;d1=23229.23229.4	controllerType=0 controllerNumber=1 scan=23229	47.5685
34923:4	1	S.MPLPPHPGHPGYINFS[+79.966]YEVLTPLKW.Y		S[+80]	743.367	4	2970.45	2970.44	0	1.5	17	Non	405.15	405.15	124.33	6.4	2376	>sp|P02817|AMELX_BOVIN Amelogenin, X isoform OS=Bos taurus OX=9913 GN=AMELX PE=1 SV=2	1	hf1_10472_ebo_34_1_261219.ScanId;v=1;d1=25881.25881.4	controllerType=0 controllerNumber=1 scan=25881	52.184
34304:4	1	S.MPLPPHPGHPGYINFS[+79.966]YEVLTPLKW.Y		S[+80]	743.37	4	2970.46	2970.44	0	5.7	17	Non	469.97	469.97	214.08	7.35	2376	>sp|P02817|AMELX_BOVIN Amelogenin, X isoform OS=Bos taurus OX=9913 GN=AMELX PE=1 SV=2	1	hf1_10472_ebo_34_1_261219.ScanId;v=1;d1=25481.25481.4	controllerType=0 controllerNumber=1 scan=25481	51.4792
34603:4	1	S.MPLPPHPGHPGYINFS[+79.966]YEVLTPLKW.Y		S[+80]	743.37	4	2970.46	2970.44	0	6.1	17	Non	530.76	530.76	257.55	7.57	2376	>sp|P02817|AMELX_BOVIN Amelogenin, X isoform OS=Bos taurus OX=9913 GN=AMELX PE=1 SV=2	1	hf1_10472_ebo_34_1_261219.ScanId;v=1;d1=25681.25681.4	controllerType=0 controllerNumber=1 scan=25681	51.8297
34007:3	1	S.MPLPPHPGHPGYINFS[+79.966]YEVLTPLKW.Y		S[+80]	990.822	3	2970.45	2970.44	0	3.3	17	Non	694.04	694.04	286.06	11.21	2376	>sp|P02817|AMELX_BOVIN Amelogenin, X isoform OS=Bos taurus OX=9913 GN=AMELX PE=1 SV=2	1	hf1_10472_ebo_34_1_261219.ScanId;v=1;d1=25291.25291.3	controllerType=0 controllerNumber=1 scan=25291	51.1424
34920:3	1	S.MPLPPHPGHPGYINFS[+79.966]YEVLTPLKW.Y		S[+80]	990.823	3	2970.45	2970.44	0	4.4	17	Non	830.4	830.4	376.77	14.21	2376	>sp|P02817|AMELX_BOVIN Amelogenin, X isoform OS=Bos taurus OX=9913 GN=AMELX PE=1 SV=2	1	hf1_10472_ebo_34_1_261219.ScanId;v=1;d1=25879.25879.3	controllerType=0 controllerNumber=1 scan=25879	52.181
34307:3	1	S.MPLPPHPGHPGYINFS[+79.966]YEVLTPLKW.Y		S[+80]	990.824	3	2970.46	2970.44	0	5.9	17	Non	1009.05	1009.05	477.43	18.39	2376	>sp|P02817|AMELX_BOVIN Amelogenin, X isoform OS=Bos taurus OX=9913 GN=AMELX PE=1 SV=2	1	hf1_10472_ebo_34_1_261219.ScanId;v=1;d1=25484.25484.3	controllerType=0 controllerNumber=1 scan=25484	51.4865
34602:3	1	S.MPLPPHPGHPGYINFS[+79.966]YEVLTPLKW.Y		S[+80]	990.825	3	2970.46	2970.44	0	6.6	17	Non	1012.01	1012.01	470.21	18.44	2376	>sp|P02817|AMELX_BOVIN Amelogenin, X isoform OS=Bos taurus OX=9913 GN=AMELX PE=1 SV=2	1	hf1_10472_ebo_34_1_261219.ScanId;v=1;d1=25680.25680.3	controllerType=0 controllerNumber=1 scan=25680	51.8289
35222:3	1	S.MPLPPHPGHPGYIN[+0.984]FS[+79.966]YEVLTPLKW.Y		N[+1], S[+80]	991.153	3	2971.44	2971.43	0	6.3	17	Non	81.93	81.93	25.95	1.11	2376	>sp|P02817|AMELX_BOVIN Amelogenin, X isoform OS=Bos taurus OX=9913 GN=AMELX PE=1 SV=2	1	hf1_10472_ebo_34_1_261219.ScanId;v=1;d1=26088.26088.2	controllerType=0 controllerNumber=1 scan=26088	52.5625
33350:4	1	S.MPLPPHPGHPGYINF[+31.990]S[+79.966]YEVLTPLKW.Y		F[+32], S[+80]	751.364	4	3002.44	3002.43	0	1.6	17	Non	127.18	63.12	6.25	0.5	2376	>sp|P02817|AMELX_BOVIN Amelogenin, X isoform OS=Bos taurus OX=9913 GN=AMELX PE=1 SV=2	1	hf1_10472_ebo_34_1_261219.ScanId;v=1;d1=24840.24840.6	controllerType=0 controllerNumber=1 scan=24840	50.3463
49999:4	1	S.MP[+15.995]LPPHPGHPGYINFS[+79.966]YEVLTPLKW.Y		P[+16], S[+80]	747.371	4	2986.46	2986.44	0	8.3	17	Non	241.37	241.37	8.99	4.43	2376	>sp|P02817|AMELX_BOVIN Amelogenin, X isoform OS=Bos taurus OX=9913 GN=AMELX PE=1 SV=2	1	hf1_10472_ebo_34_1_261219.ScanId;v=1;d1=36662.36662.4	controllerType=0 controllerNumber=1 scan=36662	73.5279
33477:4	1	S.MP[+15.995]LPPHPGHPGYINFS[+79.966]YEVLTPLKW.Y		P[+16], S[+80]	747.364	4	2986.44	2986.44	0	-0.3	17	Non	287.66	287.66	13.35	4.53	2376	>sp|P02817|AMELX_BOVIN Amelogenin, X isoform OS=Bos taurus OX=9913 GN=AMELX PE=1 SV=2	1	hf1_10472_ebo_34_1_261219.ScanId;v=1;d1=24924.24924.4	controllerType=0 controllerNumber=1 scan=24924	50.4965
32593:4	1	S.MP[+15.995]LPPHPGHPGYINFS[+79.966]YEVLTPLKW.Y		P[+16], S[+80]	747.367	4	2986.45	2986.44	0	3.4	17	Non	307.36	307.36	13.73	5.2	2376	>sp|P02817|AMELX_BOVIN Amelogenin, X isoform OS=Bos taurus OX=9913 GN=AMELX PE=1 SV=2	1	hf1_10472_ebo_34_1_261219.ScanId;v=1;d1=24313.24313.4	controllerType=0 controllerNumber=1 scan=24313	49.4338
35197:4	1	S.MPLPPHPGHPGYIN[+0.984]FS[+79.966]YEVLTPLKW.Y		N[+1], S[+80]	743.616	4	2971.44	2971.43	0	5.6	17	Non	308.25	308.25	97.87	5.73	2376	>sp|P02817|AMELX_BOVIN Amelogenin, X isoform OS=Bos taurus OX=9913 GN=AMELX PE=1 SV=2	1	hf1_10472_ebo_34_1_261219.ScanId;v=1;d1=26073.26073.4	controllerType=0 controllerNumber=1 scan=26073	52.5381
33162:4	1	S.MP[+15.995]LPPHPGHPGYINFS[+79.966]YEVLTPLKW.Y		P[+16], S[+80]	747.369	4	2986.45	2986.44	0	5.4	17	Non	449.74	449.74	13.81	7.38	2376	>sp|P02817|AMELX_BOVIN Amelogenin, X isoform OS=Bos taurus OX=9913 GN=AMELX PE=1 SV=2	1	hf1_10472_ebo_34_1_261219.ScanId;v=1;d1=24717.24717.4	controllerType=0 controllerNumber=1 scan=24717	50.1363
32882:4	1	S.MP[+15.995]LPPHPGHPGYINFS[+79.966]YEVLTPLKW.Y		P[+16], S[+80]	747.368	4	2986.45	2986.44	0	4.9	17	Non	473.05	473.05	11.02	7.35	2376	>sp|P02817|AMELX_BOVIN Amelogenin, X isoform OS=Bos taurus OX=9913 GN=AMELX PE=1 SV=2	1	hf1_10472_ebo_34_1_261219.ScanId;v=1;d1=24518.24518.4	controllerType=0 controllerNumber=1 scan=24518	49.7881
33179:3	1	S.M[+15.995]PLPPHPGHPGYINFS[+79.966]YEVLTPLKW.Y		M[+16], S[+80]	996.157	3	2986.46	2986.44	0	6.5	17	Non	844.22	844.22	26.64	14.44	2376	>sp|P02817|AMELX_BOVIN Amelogenin, X isoform OS=Bos taurus OX=9913 GN=AMELX PE=1 SV=2	1	hf1_10472_ebo_34_1_261219.ScanId;v=1;d1=24728.24728.3	controllerType=0 controllerNumber=1 scan=24728	50.1556
32615:3	1	S.M[+15.995]PLPPHPGHPGYINFS[+79.966]YEVLTPLKW.Y		M[+16], S[+80]	996.156	3	2986.45	2986.44	0	5.8	17	Non	866.79	866.79	24.91	15.39	2376	>sp|P02817|AMELX_BOVIN Amelogenin, X isoform OS=Bos taurus OX=9913 GN=AMELX PE=1 SV=2	1	hf1_10472_ebo_34_1_261219.ScanId;v=1;d1=24329.24329.3	controllerType=0 controllerNumber=1 scan=24329	49.4596
35493:3	1	S.MPLPPHPGHPGYIN[+0.984]FS[+79.966]YEVLTPLKW.Y		N[+1], S[+80]	991.153	3	2971.44	2971.43	0	6.1	17	Non	953.24	953.24	463.93	17.39	2376	>sp|P02817|AMELX_BOVIN Amelogenin, X isoform OS=Bos taurus OX=9913 GN=AMELX PE=1 SV=2	1	hf1_10472_ebo_34_1_261219.ScanId;v=1;d1=26275.26275.3	controllerType=0 controllerNumber=1 scan=26275	52.8904
32896:3	1	S.M[+15.995]PLPPHPGHPGYINFS[+79.966]YEVLTPLKW.Y		M[+16], S[+80]	996.155	3	2986.45	2986.44	0	4.8	17	Non	968.85	968.85	59.75	17.39	2376	>sp|P02817|AMELX_BOVIN Amelogenin, X isoform OS=Bos taurus OX=9913 GN=AMELX PE=1 SV=2	1	hf1_10472_ebo_34_1_261219.ScanId;v=1;d1=24529.24529.3	controllerType=0 controllerNumber=1 scan=24529	49.8069
35196:3	1	S.MPLPPHPGHPGYIN[+0.984]FS[+79.966]YEVLTPLKW.Y		N[+1], S[+80]	991.153	3	2971.44	2971.43	0	6.3	17	Non	991.54	991.54	515.29	17.39	2376	>sp|P02817|AMELX_BOVIN Amelogenin, X isoform OS=Bos taurus OX=9913 GN=AMELX PE=1 SV=2	1	hf1_10472_ebo_34_1_261219.ScanId;v=1;d1=26072.26072.3	controllerType=0 controllerNumber=1 scan=26072	52.5369
36317:3	1	S.MP[+15.995]LPPHPGHPGYINF[+31.990]S[+79.966]YEVLTPLKW.Y		F[+32], P[+16], S[+80]	1006.81	3	3018.4	3018.43	0	-8.3	17	Non	73.67	73.67	4.03	0.35	2376	>sp|P02817|AMELX_BOVIN Amelogenin, X isoform OS=Bos taurus OX=9913 GN=AMELX PE=1 SV=2	1	hf1_10472_ebo_34_1_261219.ScanId;v=1;d1=26824.26824.3	controllerType=0 controllerNumber=1 scan=26824	53.8568
31709:3	1	S.M[+15.995]PLPPHPGHPGYINFS[+79.966]YEVLTPLKW[+15.995].Y		M[+16], S[+80], W[+16]	1001.48	3	3002.43	3002.43	0	-0.3	17	Non	139.22	55.87	7.51	0.55	2376	>sp|P02817|AMELX_BOVIN Amelogenin, X isoform OS=Bos taurus OX=9913 GN=AMELX PE=1 SV=2	1	hf1_10472_ebo_34_1_261219.ScanId;v=1;d1=23722.23722.3	controllerType=0 controllerNumber=1 scan=23722	48.4106
31215:4	1	S.MP[+15.995]LPPHPGHPGYINFS[+79.966]YEVLTPLKW[+31.990].Y		P[+16], S[+80], W[+32]	755.364	4	3018.43	3018.43	0	2.8	17	Non	153.39	30.38	5.8	0.9	2376	>sp|P02817|AMELX_BOVIN Amelogenin, X isoform OS=Bos taurus OX=9913 GN=AMELX PE=1 SV=2	1	hf1_10472_ebo_34_1_261219.ScanId;v=1;d1=23392.23392.4	controllerType=0 controllerNumber=1 scan=23392	47.8444
32305:4	1	S.M[+15.995]PLPPHPGHPGY[+15.995]INFS[+79.966]YEVLTPLKW.Y		M[+16], S[+80], Y[+16]	751.366	4	3002.44	3002.43	0	4	17	Non	236.37	236.37	0	4.56	2376	>sp|P02817|AMELX_BOVIN Amelogenin, X isoform OS=Bos taurus OX=9913 GN=AMELX PE=1 SV=2	1	hf1_10472_ebo_34_1_261219.ScanId;v=1;d1=24117.24117.4	controllerType=0 controllerNumber=1 scan=24117	49.0892
32623:3	1	S.M[+15.995]PLP[+15.995]PHPGHPGYINFS[+79.966]YEVLTPLKW.Y		M[+16], P[+16], S[+80]	1001.49	3	3002.44	3002.43	0	4.6	17	Non	267.58	267.58	3.19	5.24	2376	>sp|P02817|AMELX_BOVIN Amelogenin, X isoform OS=Bos taurus OX=9913 GN=AMELX PE=1 SV=2	1	hf1_10472_ebo_34_1_261219.ScanId;v=1;d1=24336.24336.3	controllerType=0 controllerNumber=1 scan=24336	49.4729
34059:3	1	S.MP[+15.995]LPPHPGHPGYIN[+0.984]FS[+79.966]YEVLTPLKW.Y		N[+1], P[+16], S[+80]	996.483	3	2987.43	2987.42	0	5	17	Non	280.11	49.84	5.8	3.77	2376	>sp|P02817|AMELX_BOVIN Amelogenin, X isoform OS=Bos taurus OX=9913 GN=AMELX PE=1 SV=2	1	hf1_10472_ebo_34_1_261219.ScanId;v=1;d1=25323.25323.3	controllerType=0 controllerNumber=1 scan=25323	51.1978
33773:4	1	S.MP[+15.995]LPPHPGHPGYIN[+0.984]FS[+79.966]YEVLTPLKW.Y		N[+1], P[+16], S[+80]	747.615	4	2987.44	2987.42	0	6.5	17	Non	395.08	259.2	2.02	5.82	2376	>sp|P02817|AMELX_BOVIN Amelogenin, X isoform OS=Bos taurus OX=9913 GN=AMELX PE=1 SV=2	1	hf1_10472_ebo_34_1_261219.ScanId;v=1;d1=25126.25126.4	controllerType=0 controllerNumber=1 scan=25126	50.8516
34160:3	1	S.M[+15.995]PLPPHPGHPGYIN[+0.984]FS[+79.966]YEVLTPLKW.Y		M[+16], N[+1], S[+80]	996.488	3	2987.45	2987.42	0	9.8	17	Non	460.59	300.43	7.4	5.54	2376	>sp|P02817|AMELX_BOVIN Amelogenin, X isoform OS=Bos taurus OX=9913 GN=AMELX PE=1 SV=2	1	hf1_10472_ebo_34_1_261219.ScanId;v=1;d1=25388.25388.3	controllerType=0 controllerNumber=1 scan=25388	51.3126
32329:3	1	S.M[+15.995]PLPPHPGHP[+15.995]GYINFS[+79.966]YEVLTPLKW.Y		M[+16], P[+16], S[+80]	1001.49	3	3002.45	3002.43	0	5.3	17	Non	530.46	530.46	18.45	8.58	2376	>sp|P02817|AMELX_BOVIN Amelogenin, X isoform OS=Bos taurus OX=9913 GN=AMELX PE=1 SV=2	1	hf1_10472_ebo_34_1_261219.ScanId;v=1;d1=24135.24135.3	controllerType=0 controllerNumber=1 scan=24135	49.1217
33569:3	1	S.M[+15.995]PLPPHPGHPGYIN[+0.984]FS[+79.966]YEVLTPLKW.Y		M[+16], N[+1], S[+80]	996.485	3	2987.44	2987.42	0	6.7	17	Non	838.84	576.34	21.39	14.44	2376	>sp|P02817|AMELX_BOVIN Amelogenin, X isoform OS=Bos taurus OX=9913 GN=AMELX PE=1 SV=2	1	hf1_10472_ebo_34_1_261219.ScanId;v=1;d1=24987.24987.3	controllerType=0 controllerNumber=1 scan=24987	50.6058
33862:3	1	S.M[+15.995]PLPPHPGHPGYIN[+0.984]FS[+79.966]YEVLTPLKW.Y		M[+16], N[+1], S[+80]	996.484	3	2987.44	2987.42	0	5.6	17	Non	875.26	643.94	26.54	15.39	2376	>sp|P02817|AMELX_BOVIN Amelogenin, X isoform OS=Bos taurus OX=9913 GN=AMELX PE=1 SV=2	1	hf1_10472_ebo_34_1_261219.ScanId;v=1;d1=25184.25184.3	controllerType=0 controllerNumber=1 scan=25184	50.9529
34064:4	1	S.MP[+15.995]LPPHPGHP[+31.990]GYINF[+31.990]SY[+15.995]EVLTPLKW.Y		F[+32], P[+16][+32], Y[+16]	747.367	4	2986.45	2986.44	0	0.7	17	Non	201.88	201.88	0	2.74	2376	>sp|P02817|AMELX_BOVIN Amelogenin, X isoform OS=Bos taurus OX=9913 GN=AMELX PE=1 SV=2	1	hf1_10472_ebo_34_1_261219.ScanId;v=1;d1=25327.25327.4	controllerType=0 controllerNumber=1 scan=25327	51.2065
33442:3	1	S.M[+15.995]PLPPHPGHPGYINFSY[+15.995]EVLTP[+31.990]LKW[+31.990].Y		M[+16], P[+32], W[+32], Y[+16]	996.161	3	2986.47	2986.44	0	8	17	Non	381.33	381.33	13.55	7.01	2376	>sp|P02817|AMELX_BOVIN Amelogenin, X isoform OS=Bos taurus OX=9913 GN=AMELX PE=1 SV=2	1	hf1_10472_ebo_34_1_261219.ScanId;v=1;d1=24902.24902.5	controllerType=0 controllerNumber=1 scan=24902	50.458
33088:4	1	S.MPLPPHPGHPGYINFSYEVLTPLKWY.Q			764.144	4	3053.55	3053.54	0	4.5	17	Non	362.41	362.41	362.41	5.85	2376	>sp|P02817|AMELX_BOVIN Amelogenin, X isoform OS=Bos taurus OX=9913 GN=AMELX PE=1 SV=2	1	hf1_10472_ebo_34_1_261219.ScanId;v=1;d1=24666.24666.4	controllerType=0 controllerNumber=1 scan=24666	50.0395
32620:4	1	S.MP[+15.995]LPPHPGHPGYINFSYEVLTPLKWY.Q		P[+16]	768.14	4	3069.54	3069.53	0	1.7	17	Non	156.66	156.66	5.8	2.33	2376	>sp|P02817|AMELX_BOVIN Amelogenin, X isoform OS=Bos taurus OX=9913 GN=AMELX PE=1 SV=2	1	hf1_10472_ebo_34_1_261219.ScanId;v=1;d1=24333.24333.2	controllerType=0 controllerNumber=1 scan=24333	49.4657
35757:5	1	S.MPLPPHPGHPGYINFS[+79.966]YEVLTPLKWY.Q		S[+80]	627.51	5	3133.52	3133.5	0	4.8	17	Non	213.98	213.98	21.38	2.91	2376	>sp|P02817|AMELX_BOVIN Amelogenin, X isoform OS=Bos taurus OX=9913 GN=AMELX PE=1 SV=2	1	hf1_10472_ebo_34_1_261219.ScanId;v=1;d1=26451.26451.5	controllerType=0 controllerNumber=1 scan=26451	53.1996
35705:4	1	S.MPLPPHPGHPGYINFS[+79.966]YEVLTPLKWY.Q		S[+80]	784.136	4	3133.52	3133.5	0	5.8	17	Non	294.65	294.65	11.73	5.73	2376	>sp|P02817|AMELX_BOVIN Amelogenin, X isoform OS=Bos taurus OX=9913 GN=AMELX PE=1 SV=2	1	hf1_10472_ebo_34_1_261219.ScanId;v=1;d1=26415.26415.4	controllerType=0 controllerNumber=1 scan=26415	53.1368
31827:4	1	S.MP[+15.995]LPPHPGHPGYINFSYEVLTPLKWY.Q		P[+16]	768.14	4	3069.54	3069.53	0	1.7	17	Non	329.53	329.53	7.3	5.2	2376	>sp|P02817|AMELX_BOVIN Amelogenin, X isoform OS=Bos taurus OX=9913 GN=AMELX PE=1 SV=2	1	hf1_10472_ebo_34_1_261219.ScanId;v=1;d1=23799.23799.4	controllerType=0 controllerNumber=1 scan=23799	48.542
35401:4	1	S.MPLPPHPGHPGYINFS[+79.966]YEVLTPLKWY.Q		S[+80]	784.136	4	3133.52	3133.5	0	5.9	17	Non	335.82	335.82	11.2	5.81	2376	>sp|P02817|AMELX_BOVIN Amelogenin, X isoform OS=Bos taurus OX=9913 GN=AMELX PE=1 SV=2	1	hf1_10472_ebo_34_1_261219.ScanId;v=1;d1=26213.26213.4	controllerType=0 controllerNumber=1 scan=26213	52.7804
36010:4	1	S.MPLPPHPGHPGYINFS[+79.966]YEVLTPLKWY.Q		S[+80]	784.135	4	3133.52	3133.5	0	4.8	17	Non	352.38	352.38	1.95	6.03	2376	>sp|P02817|AMELX_BOVIN Amelogenin, X isoform OS=Bos taurus OX=9913 GN=AMELX PE=1 SV=2	1	hf1_10472_ebo_34_1_261219.ScanId;v=1;d1=26617.26617.4	controllerType=0 controllerNumber=1 scan=26617	53.4926
32128:4	1	S.MP[+15.995]LPPHPGHPGYINFSYEVLTPLKWY.Q		P[+16]	768.143	4	3069.55	3069.53	0	5	17	Non	434.38	434.38	1.53	7.33	2376	>sp|P02817|AMELX_BOVIN Amelogenin, X isoform OS=Bos taurus OX=9913 GN=AMELX PE=1 SV=2	1	hf1_10472_ebo_34_1_261219.ScanId;v=1;d1=23999.23999.4	controllerType=0 controllerNumber=1 scan=23999	48.8901
36850:3	1	S.MPLPPHPGHPGYINFS[+79.966]YEVLTPLKWY.Q		S[+80]	1045.18	3	3133.52	3133.5	0	4.9	17	Non	444.97	444.97	84.25	7.48	2376	>sp|P02817|AMELX_BOVIN Amelogenin, X isoform OS=Bos taurus OX=9913 GN=AMELX PE=1 SV=2	1	hf1_10472_ebo_34_1_261219.ScanId;v=1;d1=27187.27187.3	controllerType=0 controllerNumber=1 scan=27187	54.5002
35366:3	1	S.MPLPPHPGHPGYINFS[+79.966]YEVLTPLKWY.Q		S[+80]	1045.18	3	3133.53	3133.5	0	6.6	17	Non	738.36	738.36	249.42	12.44	2376	>sp|P02817|AMELX_BOVIN Amelogenin, X isoform OS=Bos taurus OX=9913 GN=AMELX PE=1 SV=2	1	hf1_10472_ebo_34_1_261219.ScanId;v=1;d1=26191.26191.3	controllerType=0 controllerNumber=1 scan=26191	52.7424
36272:3	1	S.MPLPPHPGHPGYINFS[+79.966]YEVLTPLKWY.Q		S[+80]	1045.17	3	3133.51	3133.5	0	1	17	Non	869.23	869.23	291	14.78	2376	>sp|P02817|AMELX_BOVIN Amelogenin, X isoform OS=Bos taurus OX=9913 GN=AMELX PE=1 SV=2	1	hf1_10472_ebo_34_1_261219.ScanId;v=1;d1=26793.26793.3	controllerType=0 controllerNumber=1 scan=26793	53.8026
35980:3	1	S.MPLPPHPGHPGYINFS[+79.966]YEVLTPLKWY.Q		S[+80]	1045.18	3	3133.52	3133.5	0	5.3	17	Non	1010.16	1010.16	395.68	18.39	2376	>sp|P02817|AMELX_BOVIN Amelogenin, X isoform OS=Bos taurus OX=9913 GN=AMELX PE=1 SV=2	1	hf1_10472_ebo_34_1_261219.ScanId;v=1;d1=26597.26597.3	controllerType=0 controllerNumber=1 scan=26597	53.4569
35674:3	1	S.MPLPPHPGHPGYINFS[+79.966]YEVLTPLKWY.Q		S[+80]	1045.18	3	3133.52	3133.5	0	6	17	Non	1043.83	1043.83	409.86	18.39	2376	>sp|P02817|AMELX_BOVIN Amelogenin, X isoform OS=Bos taurus OX=9913 GN=AMELX PE=1 SV=2	1	hf1_10472_ebo_34_1_261219.ScanId;v=1;d1=26394.26394.3	controllerType=0 controllerNumber=1 scan=26394	53.1001
35766:4	1	S.MPLPP[+31.990]HPGHPGYINFS[+79.966]YEVLTPLKWY.Q		P[+32], S[+80]	792.131	4	3165.5	3165.49	0	3.1	17	Non	61.62	61.62	15.57	0.61	2376	>sp|P02817|AMELX_BOVIN Amelogenin, X isoform OS=Bos taurus OX=9913 GN=AMELX PE=1 SV=2	1	hf1_10472_ebo_34_1_261219.ScanId;v=1;d1=26456.26456.4	controllerType=0 controllerNumber=1 scan=26456	53.2072
34337:5	1	S.MP[+15.995]LPPHPGHPGYINFS[+79.966]YEVLTPLKWY.Q		P[+16], S[+80]	630.709	5	3149.52	3149.5	0	5.6	17	Non	67.78	67.78	5.8	0.82	2376	>sp|P02817|AMELX_BOVIN Amelogenin, X isoform OS=Bos taurus OX=9913 GN=AMELX PE=1 SV=2	1	hf1_10472_ebo_34_1_261219.ScanId;v=1;d1=25503.25503.5	controllerType=0 controllerNumber=1 scan=25503	51.5177
34327:4	1	S.M[+15.995]PLPPHPGHPGYINFSY[+31.990]EVLTPLKWY.Q		M[+16], Y[+32]	776.141	4	3101.54	3101.52	0	6.6	17	Non	79.03	79.03	2.18	0.84	2376	>sp|P02817|AMELX_BOVIN Amelogenin, X isoform OS=Bos taurus OX=9913 GN=AMELX PE=1 SV=2	1	hf1_10472_ebo_34_1_261219.ScanId;v=1;d1=25498.25498.4	controllerType=0 controllerNumber=1 scan=25498	51.5102
35560:4	1	S.MPLPPHPGHPGYINFS[+79.966]Y[+31.990]EVLTPLKWY.Q		S[+80], Y[+32]	792.131	4	3165.5	3165.49	0	1.9	17	Non	79.59	79.59	18.43	0.54	2376	>sp|P02817|AMELX_BOVIN Amelogenin, X isoform OS=Bos taurus OX=9913 GN=AMELX PE=1 SV=2	1	hf1_10472_ebo_34_1_261219.ScanId;v=1;d1=26318.26318.4	controllerType=0 controllerNumber=1 scan=26318	52.9672
49935:3	1	S.MP[+15.995]LPPHPGHPGYINFS[+79.966]YEVLTPLKWY.Q		P[+16], S[+80]	1050.51	3	3149.52	3149.5	0	5.6	17	Non	122.25	122.25	4	2.93	2376	>sp|P02817|AMELX_BOVIN Amelogenin, X isoform OS=Bos taurus OX=9913 GN=AMELX PE=1 SV=2	1	hf1_10472_ebo_34_1_261219.ScanId;v=1;d1=36620.36620.3	controllerType=0 controllerNumber=1 scan=36620	73.4533
21840:4	1	S.MPLPPHPGHPGYINFSYEVLTP[+31.990]LKWY[+31.990].Q		P[+32], Y[+32]	780.141	4	3117.54	3117.52	0	8.2	17	Non	125.71	125.71	0	1.63	2376	>sp|P02817|AMELX_BOVIN Amelogenin, X isoform OS=Bos taurus OX=9913 GN=AMELX PE=1 SV=2	1	hf1_10472_ebo_34_1_261219.ScanId;v=1;d1=17114.17114.4	controllerType=0 controllerNumber=1 scan=17114	37.1898
34968:4	1	S.MPLPPHPGHPGYINFS[+79.966]Y[+31.990]EVLTPLKWY.Q		S[+80], Y[+32]	792.129	4	3165.49	3165.49	0	-0.2	17	Non	159.55	159.55	14.14	2.32	2376	>sp|P02817|AMELX_BOVIN Amelogenin, X isoform OS=Bos taurus OX=9913 GN=AMELX PE=1 SV=2	1	hf1_10472_ebo_34_1_261219.ScanId;v=1;d1=25908.25908.4	controllerType=0 controllerNumber=1 scan=25908	52.2317
34958:4	1	S.MPLPPHPGHPGYINFS[+79.966]Y[+31.990]EVLTPLKWY.Q		S[+80], Y[+32]	792.129	4	3165.49	3165.49	0	-0.2	17	Non	171.13	171.13	7.67	2.32	2376	>sp|P02817|AMELX_BOVIN Amelogenin, X isoform OS=Bos taurus OX=9913 GN=AMELX PE=1 SV=2	1	hf1_10472_ebo_34_1_261219.ScanId;v=1;d1=25903.25903.4	controllerType=0 controllerNumber=1 scan=25903	52.2248
49973:4	1	S.MP[+15.995]LPPHPGHPGYINFS[+79.966]YEVLTPLKWY.Q		P[+16], S[+80]	788.137	4	3149.53	3149.5	0	8.4	17	Non	183.86	183.86	5.8	2.68	2376	>sp|P02817|AMELX_BOVIN Amelogenin, X isoform OS=Bos taurus OX=9913 GN=AMELX PE=1 SV=2	1	hf1_10472_ebo_34_1_261219.ScanId;v=1;d1=36643.36643.4	controllerType=0 controllerNumber=1 scan=36643	73.4936
33752:4	1	S.MPLPP[+31.990]HPGHPGYINFS[+79.966]YEVLTPLKWY.Q		P[+32], S[+80]	792.133	4	3165.51	3165.49	0	4.7	17	Non	214.58	214.58	4.02	3.33	2376	>sp|P02817|AMELX_BOVIN Amelogenin, X isoform OS=Bos taurus OX=9913 GN=AMELX PE=1 SV=2	1	hf1_10472_ebo_34_1_261219.ScanId;v=1;d1=25111.25111.4	controllerType=0 controllerNumber=1 scan=25111	50.8237
34135:4	1	S.MPLPPHPGHPGYINFS[+79.966]Y[+31.990]EVLTPLKWY.Q		S[+80], Y[+32]	792.133	4	3165.51	3165.49	0	4.6	17	Non	217.31	217.31	21.94	3.33	2376	>sp|P02817|AMELX_BOVIN Amelogenin, X isoform OS=Bos taurus OX=9913 GN=AMELX PE=1 SV=2	1	hf1_10472_ebo_34_1_261219.ScanId;v=1;d1=25370.25370.4	controllerType=0 controllerNumber=1 scan=25370	51.2804
33947:5	1	S.MP[+15.995]LPPHPGHPGYINFS[+79.966]YEVLTPLKWY.Q		P[+16], S[+80]	630.709	5	3149.52	3149.5	0	5.6	17	Non	217.41	217.41	5.8	2.91	2376	>sp|P02817|AMELX_BOVIN Amelogenin, X isoform OS=Bos taurus OX=9913 GN=AMELX PE=1 SV=2	1	hf1_10472_ebo_34_1_261219.ScanId;v=1;d1=25245.25245.5	controllerType=0 controllerNumber=1 scan=25245	51.0595
34655:4	1	S.MPLPPHP[+31.990]GHPGYINFS[+79.966]YEVLTPLKWY.Q		P[+32], S[+80]	792.133	4	3165.51	3165.49	0	4.9	17	Non	218.13	218.13	4.34	3.33	2376	>sp|P02817|AMELX_BOVIN Amelogenin, X isoform OS=Bos taurus OX=9913 GN=AMELX PE=1 SV=2	1	hf1_10472_ebo_34_1_261219.ScanId;v=1;d1=25712.25712.4	controllerType=0 controllerNumber=1 scan=25712	51.8829
33518:4	1	S.MPLPPHPGHPGYINFS[+79.966]Y[+31.990]EVLTPLKWY.Q		S[+80], Y[+32]	792.133	4	3165.51	3165.49	0	4.6	17	Non	223.14	223.14	13.47	3.54	2376	>sp|P02817|AMELX_BOVIN Amelogenin, X isoform OS=Bos taurus OX=9913 GN=AMELX PE=1 SV=2	1	hf1_10472_ebo_34_1_261219.ScanId;v=1;d1=24951.24951.4	controllerType=0 controllerNumber=1 scan=24951	50.5438
33996:5	1	S.MP[+15.995]LPPHPGHPGYINFS[+79.966]YEVLTPLKWY.Q		P[+16], S[+80]	630.71	5	3149.52	3149.5	0	6.7	17	Non	229.58	229.58	4	3.13	2376	>sp|P02817|AMELX_BOVIN Amelogenin, X isoform OS=Bos taurus OX=9913 GN=AMELX PE=1 SV=2	1	hf1_10472_ebo_34_1_261219.ScanId;v=1;d1=25283.25283.5	controllerType=0 controllerNumber=1 scan=25283	51.1249
36023:4	1	S.MPLPPHPGHPGYINF[+15.995]S[+79.966]YEVLTPLKWY.Q		F[+16], S[+80]	788.136	4	3149.52	3149.5	0	6.8	17	Non	234.53	234.53	21.27	3.59	2376	>sp|P02817|AMELX_BOVIN Amelogenin, X isoform OS=Bos taurus OX=9913 GN=AMELX PE=1 SV=2	1	hf1_10472_ebo_34_1_261219.ScanId;v=1;d1=26626.26626.3	controllerType=0 controllerNumber=1 scan=26626	53.5063
34869:4	1	S.MP[+15.995]LPPHPGHPGYINFS[+79.966]YEVLTPLKWY.Q		P[+16], S[+80]	788.134	4	3149.51	3149.5	0	4	17	Non	250.68	250.68	5.8	4.72	2376	>sp|P02817|AMELX_BOVIN Amelogenin, X isoform OS=Bos taurus OX=9913 GN=AMELX PE=1 SV=2	1	hf1_10472_ebo_34_1_261219.ScanId;v=1;d1=25847.25847.4	controllerType=0 controllerNumber=1 scan=25847	52.1223
36600:4	1	S.MPLPPHPGHPGYIN[+0.984]FS[+79.966]YEVLTPLKWY.Q		N[+1], S[+80]	784.381	4	3134.5	3134.49	0	4.9	17	Non	291.17	291.17	23.21	5.39	2376	>sp|P02817|AMELX_BOVIN Amelogenin, X isoform OS=Bos taurus OX=9913 GN=AMELX PE=1 SV=2	1	hf1_10472_ebo_34_1_261219.ScanId;v=1;d1=27015.27015.4	controllerType=0 controllerNumber=1 scan=27015	54.1939
36301:4	1	S.MPLPPHPGHPGYIN[+0.984]FS[+79.966]YEVLTPLKWY.Q		N[+1], S[+80]	784.382	4	3134.5	3134.49	0	5.2	17	Non	310.39	310.39	58.85	5.31	2376	>sp|P02817|AMELX_BOVIN Amelogenin, X isoform OS=Bos taurus OX=9913 GN=AMELX PE=1 SV=2	1	hf1_10472_ebo_34_1_261219.ScanId;v=1;d1=26813.26813.4	controllerType=0 controllerNumber=1 scan=26813	53.8378
33971:4	1	S.MP[+15.995]LPPHPGHPGYINFS[+79.966]YEVLTPLKWY.Q		P[+16], S[+80]	788.135	4	3149.52	3149.5	0	5.9	17	Non	311.59	311.59	4	5.31	2376	>sp|P02817|AMELX_BOVIN Amelogenin, X isoform OS=Bos taurus OX=9913 GN=AMELX PE=1 SV=2	1	hf1_10472_ebo_34_1_261219.ScanId;v=1;d1=25265.25265.4	controllerType=0 controllerNumber=1 scan=25265	51.0963
34561:4	1	S.MP[+15.995]LPPHPGHPGYINFS[+79.966]YEVLTPLKWY.Q		P[+16], S[+80]	788.135	4	3149.52	3149.5	0	5.4	17	Non	338.16	338.16	5.8	5.81	2376	>sp|P02817|AMELX_BOVIN Amelogenin, X isoform OS=Bos taurus OX=9913 GN=AMELX PE=1 SV=2	1	hf1_10472_ebo_34_1_261219.ScanId;v=1;d1=25652.25652.4	controllerType=0 controllerNumber=1 scan=25652	51.779
34267:4	1	S.MP[+15.995]LPPHPGHPGYINFS[+79.966]YEVLTPLKWY.Q		P[+16], S[+80]	788.135	4	3149.52	3149.5	0	5.4	17	Non	339.82	339.82	4	5.86	2376	>sp|P02817|AMELX_BOVIN Amelogenin, X isoform OS=Bos taurus OX=9913 GN=AMELX PE=1 SV=2	1	hf1_10472_ebo_34_1_261219.ScanId;v=1;d1=25457.25457.4	controllerType=0 controllerNumber=1 scan=25457	51.4372
36851:3	1	S.MPLPPHPGHPGYIN[+0.984]FS[+79.966]YEVLTPLKWY.Q		N[+1], S[+80]	1045.51	3	3134.51	3134.49	0	8	17	Non	429.28	429.28	187.19	7.48	2376	>sp|P02817|AMELX_BOVIN Amelogenin, X isoform OS=Bos taurus OX=9913 GN=AMELX PE=1 SV=2	1	hf1_10472_ebo_34_1_261219.ScanId;v=1;d1=27187.27187.3	controllerType=0 controllerNumber=1 scan=27187	54.5002
34853:3	1	S.M[+15.995]PLPPHPGHPGYINFS[+79.966]YEVLTPLKWY.Q		M[+16], S[+80]	1050.51	3	3149.53	3149.5	0	8.7	17	Non	600.41	600.41	1.45	9.57	2376	>sp|P02817|AMELX_BOVIN Amelogenin, X isoform OS=Bos taurus OX=9913 GN=AMELX PE=1 SV=2	1	hf1_10472_ebo_34_1_261219.ScanId;v=1;d1=25837.25837.3	controllerType=0 controllerNumber=1 scan=25837	52.1047
34542:3	1	S.M[+15.995]PLPPHPGHPGYINFS[+79.966]YEVLTPLKWY.Q		M[+16], S[+80]	1050.51	3	3149.52	3149.5	0	5.8	17	Non	861.59	861.59	9.71	15.39	2376	>sp|P02817|AMELX_BOVIN Amelogenin, X isoform OS=Bos taurus OX=9913 GN=AMELX PE=1 SV=2	1	hf1_10472_ebo_34_1_261219.ScanId;v=1;d1=25640.25640.3	controllerType=0 controllerNumber=1 scan=25640	51.7589
36568:3	1	S.MPLPPHPGHPGYIN[+0.984]FS[+79.966]YEVLTPLKWY.Q		N[+1], S[+80]	1045.51	3	3134.51	3134.49	0	5.5	17	Non	895.76	895.76	396.1	15.39	2376	>sp|P02817|AMELX_BOVIN Amelogenin, X isoform OS=Bos taurus OX=9913 GN=AMELX PE=1 SV=2	1	hf1_10472_ebo_34_1_261219.ScanId;v=1;d1=26993.26993.3	controllerType=0 controllerNumber=1 scan=26993	54.1554
33950:3	1	S.M[+15.995]PLPPHPGHPGYINFS[+79.966]YEVLTPLKWY.Q		M[+16], S[+80]	1050.51	3	3149.52	3149.5	0	5.8	17	Non	900.93	900.93	26.02	16.39	2376	>sp|P02817|AMELX_BOVIN Amelogenin, X isoform OS=Bos taurus OX=9913 GN=AMELX PE=1 SV=2	1	hf1_10472_ebo_34_1_261219.ScanId;v=1;d1=25248.25248.3	controllerType=0 controllerNumber=1 scan=25248	51.0667
36273:3	1	S.MPLPPHPGHPGYIN[+0.984]FS[+79.966]YEVLTPLKWY.Q		N[+1], S[+80]	1045.51	3	3134.51	3134.49	0	6	17	Non	914.88	914.88	369.1	16.39	2376	>sp|P02817|AMELX_BOVIN Amelogenin, X isoform OS=Bos taurus OX=9913 GN=AMELX PE=1 SV=2	1	hf1_10472_ebo_34_1_261219.ScanId;v=1;d1=26793.26793.3	controllerType=0 controllerNumber=1 scan=26793	53.8026
34250:3	1	S.M[+15.995]PLPPHPGHPGYINFS[+79.966]YEVLTPLKWY.Q		M[+16], S[+80]	1050.51	3	3149.52	3149.5	0	5.9	17	Non	965.65	965.65	38.65	17.39	2376	>sp|P02817|AMELX_BOVIN Amelogenin, X isoform OS=Bos taurus OX=9913 GN=AMELX PE=1 SV=2	1	hf1_10472_ebo_34_1_261219.ScanId;v=1;d1=25446.25446.3	controllerType=0 controllerNumber=1 scan=25446	51.4185
30931:4	1	S.M[+15.995]PLPPHPGHPGYINFS[+79.966]YEVLTPLKW[+31.990]Y.Q		M[+16], S[+80], W[+32]	796.132	4	3181.5	3181.49	0	4.9	17	Non	37.16	37.16	0	0.42	2376	>sp|P02817|AMELX_BOVIN Amelogenin, X isoform OS=Bos taurus OX=9913 GN=AMELX PE=1 SV=2	1	hf1_10472_ebo_34_1_261219.ScanId;v=1;d1=23210.23210.4	controllerType=0 controllerNumber=1 scan=23210	47.5353
34345:4	1	S.MPLPPHPGHPGYIN[+0.984]FS[+79.966]Y[+31.990]EVLTPLKWY.Q		N[+1], S[+80], Y[+32]	792.382	4	3166.51	3166.48	0	8.6	17	Non	66.31	66.31	3.63	0.43	2376	>sp|P02817|AMELX_BOVIN Amelogenin, X isoform OS=Bos taurus OX=9913 GN=AMELX PE=1 SV=2	1	hf1_10472_ebo_34_1_261219.ScanId;v=1;d1=25509.25509.4	controllerType=0 controllerNumber=1 scan=25509	51.5295
32762:4	1	S.MPLPPHPGHPGYIN[+0.984]FS[+79.966]YEVLTPLKW[+15.995]Y.Q		N[+1], S[+80], W[+16]	788.382	4	3150.51	3150.48	0	7.5	17	Non	79.08	71.17	13.26	0.72	2376	>sp|P02817|AMELX_BOVIN Amelogenin, X isoform OS=Bos taurus OX=9913 GN=AMELX PE=1 SV=2	1	hf1_10472_ebo_34_1_261219.ScanId;v=1;d1=24431.24431.4	controllerType=0 controllerNumber=1 scan=24431	49.6306
35815:4	1	S.MPLPPHPGHPGYIN[+0.984]FS[+79.966]Y[+15.995]EVLTPLKWY.Q		N[+1], S[+80], Y[+16]	788.382	4	3150.51	3150.48	0	7.4	17	Non	103.73	103.73	2.88	0.84	2376	>sp|P02817|AMELX_BOVIN Amelogenin, X isoform OS=Bos taurus OX=9913 GN=AMELX PE=1 SV=2	1	hf1_10472_ebo_34_1_261219.ScanId;v=1;d1=26486.26486.4	controllerType=0 controllerNumber=1 scan=26486	53.2609
34651:4	1	S.MP[+15.995]LPPHPGHPGYINF[+31.990]SY[+31.990]EVLTPLKWY.Q		F[+32], P[+16], Y[+32]	784.138	4	3133.53	3133.51	0	5.8	17	Non	106.96	106.96	5.8	0.79	2376	>sp|P02817|AMELX_BOVIN Amelogenin, X isoform OS=Bos taurus OX=9913 GN=AMELX PE=1 SV=2	1	hf1_10472_ebo_34_1_261219.ScanId;v=1;d1=25709.25709.4	controllerType=0 controllerNumber=1 scan=25709	51.8757
22352:3	1	S.MPLPPHPGHPGYIN[+0.984]FSYEVLTP[+31.990]LKW[+31.990]Y.Q		N[+1], P[+32], W[+32]	1040.18	3	3118.52	3118.5	0	6.9	17	Non	110.12	110.12	0	2.62	2376	>sp|P02817|AMELX_BOVIN Amelogenin, X isoform OS=Bos taurus OX=9913 GN=AMELX PE=1 SV=2	1	hf1_10472_ebo_34_1_261219.ScanId;v=1;d1=17460.17460.3	controllerType=0 controllerNumber=1 scan=17460	37.774
36137:4	1	S.MPLPPHPGHPGYIN[+0.984]F[+15.995]S[+79.966]YEVLTPLKWY.Q		F[+16], N[+1], S[+80]	788.381	4	3150.5	3150.48	0	5.5	17	Non	115.17	115.17	1.04	0.8	2376	>sp|P02817|AMELX_BOVIN Amelogenin, X isoform OS=Bos taurus OX=9913 GN=AMELX PE=1 SV=2	1	hf1_10472_ebo_34_1_261219.ScanId;v=1;d1=26702.26702.4	controllerType=0 controllerNumber=1 scan=26702	53.6409
37517:3	1	S.MPLPPHPGHP[+31.990]GY[+31.990]INF[+15.995]SYEVLTPLKWY.Q		F[+16], P[+32], Y[+32]	1045.18	3	3133.52	3133.51	0	1.8	17	Non	123.17	123.17	0.84	0.69	2376	>sp|P02817|AMELX_BOVIN Amelogenin, X isoform OS=Bos taurus OX=9913 GN=AMELX PE=1 SV=2	1	hf1_10472_ebo_34_1_261219.ScanId;v=1;d1=27624.27624.5	controllerType=0 controllerNumber=1 scan=27624	55.2787
35501:4	1	S.MP[+15.995]LPPHPGHPGYIN[+0.984]FS[+79.966]YEVLTPLKWY.Q		N[+1], P[+16], S[+80]	788.384	4	3150.51	3150.48	0	9.7	17	Non	129.61	129.61	5.8	0.49	2376	>sp|P02817|AMELX_BOVIN Amelogenin, X isoform OS=Bos taurus OX=9913 GN=AMELX PE=1 SV=2	1	hf1_10472_ebo_34_1_261219.ScanId;v=1;d1=26281.26281.4	controllerType=0 controllerNumber=1 scan=26281	52.9012
33082:4	1	S.MP[+15.995]LPPHPGHPGYINFS[+79.966]YEVLTPLKWY[+31.990].Q		P[+16], S[+80], Y[+32]	796.131	4	3181.5	3181.49	0	4.1	17	Non	148.64	148.64	0	2.43	2376	>sp|P02817|AMELX_BOVIN Amelogenin, X isoform OS=Bos taurus OX=9913 GN=AMELX PE=1 SV=2	1	hf1_10472_ebo_34_1_261219.ScanId;v=1;d1=24663.24663.4	controllerType=0 controllerNumber=1 scan=24663	50.035
34899:3	1	S.MPLP[+31.990]PHPGHPGYIN[+0.984]FS[+79.966]YEVLTPLKWY.Q		N[+1], P[+32], S[+80]	1056.17	3	3166.49	3166.48	0	4.4	17	Non	155.95	121.46	4.33	2.31	2376	>sp|P02817|AMELX_BOVIN Amelogenin, X isoform OS=Bos taurus OX=9913 GN=AMELX PE=1 SV=2	1	hf1_10472_ebo_34_1_261219.ScanId;v=1;d1=25865.25865.3	controllerType=0 controllerNumber=1 scan=25865	52.1543
33465:4	1	S.M[+15.995]PLPPHPGHPGYINFS[+79.966]YEVLTPLKW[+15.995]Y.Q		M[+16], S[+80], W[+16]	792.133	4	3165.51	3165.49	0	4.9	17	Non	168.5	168.5	3.16	2.5	2376	>sp|P02817|AMELX_BOVIN Amelogenin, X isoform OS=Bos taurus OX=9913 GN=AMELX PE=1 SV=2	1	hf1_10472_ebo_34_1_261219.ScanId;v=1;d1=24915.24915.4	controllerType=0 controllerNumber=1 scan=24915	50.4802
37057:4	1	S.MPLPPHPGHPGY[+15.995]INF[+31.990]SY[+31.990]EVLTPLKWY.Q		F[+32], Y[+16][+32]	784.131	4	3133.5	3133.51	0	-3.3	17	Non	171.01	171.01	5.78	2.51	2376	>sp|P02817|AMELX_BOVIN Amelogenin, X isoform OS=Bos taurus OX=9913 GN=AMELX PE=1 SV=2	1	hf1_10472_ebo_34_1_261219.ScanId;v=1;d1=27321.27321.4	controllerType=0 controllerNumber=1 scan=27321	54.7363
37847:3	1	S.MP[+15.995]LPPHPGHPGYINFS[+79.966]Y[+15.995]EVLTPLKWY.Q		P[+16], S[+80], Y[+16]	1055.84	3	3165.51	3165.49	0	6.4	17	Non	219.83	219.83	5.8	3.91	2376	>sp|P02817|AMELX_BOVIN Amelogenin, X isoform OS=Bos taurus OX=9913 GN=AMELX PE=1 SV=2	1	hf1_10472_ebo_34_1_261219.ScanId;v=1;d1=27841.27841.3	controllerType=0 controllerNumber=1 scan=27841	55.6703
31328:4	1	S.MP[+15.995]LPPHPGHPGYINFS[+79.966]YEVLTPLKW[+15.995]Y.Q		P[+16], S[+80], W[+16]	792.133	4	3165.51	3165.49	0	4.5	17	Non	223.19	223.19	5.34	3.37	2376	>sp|P02817|AMELX_BOVIN Amelogenin, X isoform OS=Bos taurus OX=9913 GN=AMELX PE=1 SV=2	1	hf1_10472_ebo_34_1_261219.ScanId;v=1;d1=23467.23467.4	controllerType=0 controllerNumber=1 scan=23467	47.9723
32551:3	1	S.MP[+15.995]LPPHPGHPGYINFS[+79.966]YEVLTPLKW[+15.995]Y.Q		P[+16], S[+80], W[+16]	1055.84	3	3165.52	3165.49	0	7	17	Non	250.88	250.88	0	5.33	2376	>sp|P02817|AMELX_BOVIN Amelogenin, X isoform OS=Bos taurus OX=9913 GN=AMELX PE=1 SV=2	1	hf1_10472_ebo_34_1_261219.ScanId;v=1;d1=24280.24280.3	controllerType=0 controllerNumber=1 scan=24280	49.3712
35151:4	1	S.MP[+15.995]LPPHPGHPGYIN[+0.984]FS[+79.966]YEVLTPLKWY.Q		N[+1], P[+16], S[+80]	788.381	4	3150.5	3150.48	0	5.8	17	Non	266.37	266.37	5.8	5.39	2376	>sp|P02817|AMELX_BOVIN Amelogenin, X isoform OS=Bos taurus OX=9913 GN=AMELX PE=1 SV=2	1	hf1_10472_ebo_34_1_261219.ScanId;v=1;d1=26037.26037.4	controllerType=0 controllerNumber=1 scan=26037	52.4705
34898:3	1	S.MP[+15.995]LPPH[+15.995]PGHPGYINFS[+79.966]YEVLTPLKWY.Q		H[+16], P[+16], S[+80]	1055.84	3	3165.51	3165.49	0	5.6	17	Non	287.41	287.41	0	5.48	2376	>sp|P02817|AMELX_BOVIN Amelogenin, X isoform OS=Bos taurus OX=9913 GN=AMELX PE=1 SV=2	1	hf1_10472_ebo_34_1_261219.ScanId;v=1;d1=25865.25865.3	controllerType=0 controllerNumber=1 scan=25865	52.1543
33261:3	1	S.MP[+15.995]LPPHPGHPGYINFS[+79.966]YEVLTPLKW[+15.995]Y.Q		P[+16], S[+80], W[+16]	1055.84	3	3165.51	3165.49	0	4.9	17	Non	300.6	300.6	0	5.77	2376	>sp|P02817|AMELX_BOVIN Amelogenin, X isoform OS=Bos taurus OX=9913 GN=AMELX PE=1 SV=2	1	hf1_10472_ebo_34_1_261219.ScanId;v=1;d1=24781.24781.3	controllerType=0 controllerNumber=1 scan=24781	50.2445
35370:3	1	S.MP[+15.995]LPPHPGHPGYIN[+0.984]FS[+79.966]YEVLTPLKWY.Q		N[+1], P[+16], S[+80]	1050.84	3	3150.51	3150.48	0	8.5	17	Non	304.93	304.93	5.8	4.8	2376	>sp|P02817|AMELX_BOVIN Amelogenin, X isoform OS=Bos taurus OX=9913 GN=AMELX PE=1 SV=2	1	hf1_10472_ebo_34_1_261219.ScanId;v=1;d1=26193.26193.5	controllerType=0 controllerNumber=1 scan=26193	52.7449
35412:3	1	S.MP[+15.995]LPPHPGHPGYIN[+0.984]FS[+79.966]YEVLTPLKWY.Q		N[+1], P[+16], S[+80]	1050.84	3	3150.51	3150.48	0	9.5	17	Non	490.88	490.88	5.8	6.64	2376	>sp|P02817|AMELX_BOVIN Amelogenin, X isoform OS=Bos taurus OX=9913 GN=AMELX PE=1 SV=2	1	hf1_10472_ebo_34_1_261219.ScanId;v=1;d1=26221.26221.3	controllerType=0 controllerNumber=1 scan=26221	52.7952
33863:3	1	S.MP[+15.995]LPP[+15.995]HPGHPGYINFS[+79.966]YEVLTPLKWY.Q		P[+16]*2, S[+80]	1055.84	3	3165.51	3165.49	0	4.4	17	Non	560.59	560.59	5.18	7.77	2376	>sp|P02817|AMELX_BOVIN Amelogenin, X isoform OS=Bos taurus OX=9913 GN=AMELX PE=1 SV=2	1	hf1_10472_ebo_34_1_261219.ScanId;v=1;d1=25185.25185.3	controllerType=0 controllerNumber=1 scan=25185	50.9544
33563:3	1	S.M[+15.995]PLPPHPGHPGY[+15.995]INFS[+79.966]YEVLTPLKWY.Q		M[+16], S[+80], Y[+16]	1055.84	3	3165.51	3165.49	0	5.6	17	Non	564.52	564.52	7.17	8.72	2376	>sp|P02817|AMELX_BOVIN Amelogenin, X isoform OS=Bos taurus OX=9913 GN=AMELX PE=1 SV=2	1	hf1_10472_ebo_34_1_261219.ScanId;v=1;d1=24983.24983.3	controllerType=0 controllerNumber=1 scan=24983	50.5998
35133:3	1	S.M[+15.995]PLPPHPGHPGYIN[+0.984]FS[+79.966]YEVLTPLKWY.Q		M[+16], N[+1], S[+80]	1050.84	3	3150.5	3150.48	0	6.5	17	Non	901	901	19.22	16.44	2376	>sp|P02817|AMELX_BOVIN Amelogenin, X isoform OS=Bos taurus OX=9913 GN=AMELX PE=1 SV=2	1	hf1_10472_ebo_34_1_261219.ScanId;v=1;d1=26023.26023.3	controllerType=0 controllerNumber=1 scan=26023	52.4437
33050:3	1	S.MP[+15.995]LPPHPGHPGYINF[+31.990]SY[+31.990]EVLTPLKW[+15.995]Y.Q		F[+32], P[+16], W[+16], Y[+32]	1050.51	3	3149.52	3149.51	0	4.7	17	Non	48.84	48.84	0	0.54	2376	>sp|P02817|AMELX_BOVIN Amelogenin, X isoform OS=Bos taurus OX=9913 GN=AMELX PE=1 SV=2	1	hf1_10472_ebo_34_1_261219.ScanId;v=1;d1=24639.24639.3	controllerType=0 controllerNumber=1 scan=24639	49.9905
49896:3	1	S.MPLPPHPGHP[+15.995]GY[+31.990]IN[+0.984]F[+31.990]SYEVLTPLKWY.Q		F[+32], N[+1], P[+16], Y[+32]	1045.51	3	3134.52	3134.5	0	6	17	Non	53.56	53.56	0	2.51	2376	>sp|P02817|AMELX_BOVIN Amelogenin, X isoform OS=Bos taurus OX=9913 GN=AMELX PE=1 SV=2	1	hf1_10472_ebo_34_1_261219.ScanId;v=1;d1=36593.36593.3	controllerType=0 controllerNumber=1 scan=36593	73.4079
35462:5	1	S.MPLPPHPGHPGY[+15.995]IN[+0.984]F[+31.990]SY[+31.990]EVLTPLKWY.Q		F[+32], N[+1], Y[+16][+32]	627.711	5	3134.53	3134.5	0	9.3	17	Non	141.06	141.06	13.71	1.09	2376	>sp|P02817|AMELX_BOVIN Amelogenin, X isoform OS=Bos taurus OX=9913 GN=AMELX PE=1 SV=2	1	hf1_10472_ebo_34_1_261219.ScanId;v=1;d1=26254.26254.5	controllerType=0 controllerNumber=1 scan=26254	52.8531
34262:3	1	S.MP[+15.995]LPPHPGHPGYIN[+0.984]FS[+79.966]Y[+31.990]EVLTPLKWY.Q		N[+1], P[+16], S[+80], Y[+32]	1061.5	3	3182.49	3182.47	0	5.3	17	Non	141.52	141.52	3.23	2.33	2376	>sp|P02817|AMELX_BOVIN Amelogenin, X isoform OS=Bos taurus OX=9913 GN=AMELX PE=1 SV=2	1	hf1_10472_ebo_34_1_261219.ScanId;v=1;d1=25453.25453.3	controllerType=0 controllerNumber=1 scan=25453	51.4284
49889:4	1	S.MPLPPHPGHPGY[+15.995]IN[+0.984]F[+31.990]SY[+31.990]EVLTPLKWY.Q		F[+32], N[+1], Y[+16][+32]	784.384	4	3134.51	3134.5	0	5.4	17	Non	197.44	197.44	10.79	3.48	2376	>sp|P02817|AMELX_BOVIN Amelogenin, X isoform OS=Bos taurus OX=9913 GN=AMELX PE=1 SV=2	1	hf1_10472_ebo_34_1_261219.ScanId;v=1;d1=36588.36588.4	controllerType=0 controllerNumber=1 scan=36588	73.3975
30609:4	1	S.MPLPPHPGHPGYINFSYEVLTPLKWYQ.S			796.158	4	3181.61	3181.6	0	4	17	Non	59.92	59.92	59.92	0.61	2376	>sp|P02817|AMELX_BOVIN Amelogenin, X isoform OS=Bos taurus OX=9913 GN=AMELX PE=1 SV=2	1	hf1_10472_ebo_34_1_261219.ScanId;v=1;d1=23007.23007.4	controllerType=0 controllerNumber=1 scan=23007	47.1832
32913:4	1	S.MPLPPHPGHPGYINFSYEVLTPLKWYQ.S			796.152	4	3181.59	3181.6	0	-3.3	17	Non	81.38	47.91	47.91	0.45	2376	>sp|P02817|AMELX_BOVIN Amelogenin, X isoform OS=Bos taurus OX=9913 GN=AMELX PE=1 SV=2	1	hf1_10472_ebo_34_1_261219.ScanId;v=1;d1=24541.24541.4	controllerType=0 controllerNumber=1 scan=24541	49.8264
34264:4	1	S.MPLPPHPGHPGYINFSYEVLTPLKWYQ.S			796.149	4	3181.57	3181.6	0	-7.3	17	Non	164.22	132.76	132.76	0.6	2376	>sp|P02817|AMELX_BOVIN Amelogenin, X isoform OS=Bos taurus OX=9913 GN=AMELX PE=1 SV=2	1	hf1_10472_ebo_34_1_261219.ScanId;v=1;d1=25454.25454.4	controllerType=0 controllerNumber=1 scan=25454	51.4299
33870:4	1	S.MPLPPHPGHPGYINFSYEVLTPLKWYQ.S			796.152	4	3181.59	3181.6	0	-3.3	17	Non	299.67	257.26	257.26	4.49	2376	>sp|P02817|AMELX_BOVIN Amelogenin, X isoform OS=Bos taurus OX=9913 GN=AMELX PE=1 SV=2	1	hf1_10472_ebo_34_1_261219.ScanId;v=1;d1=25189.25189.4	controllerType=0 controllerNumber=1 scan=25189	50.9605
36486:4	1	S.MP[+15.995]LPPHPGHPGYINFSYEVLTPLKWYQ.S		P[+16]	800.158	4	3197.61	3197.59	0	5.1	17	Non	10.65	10.65	10.65	0.25	2376	>sp|P02817|AMELX_BOVIN Amelogenin, X isoform OS=Bos taurus OX=9913 GN=AMELX PE=1 SV=2	1	hf1_10472_ebo_34_1_261219.ScanId;v=1;d1=26939.26939.4	controllerType=0 controllerNumber=1 scan=26939	54.0607
34886:4	1	S.MPLPPHPGHPGYINFS[+79.966]YEVLTPLKWYQ.S		S[+80]	816.149	4	3261.57	3261.56	0	2.9	17	Non	314.53	314.53	90.11	5.52	2376	>sp|P02817|AMELX_BOVIN Amelogenin, X isoform OS=Bos taurus OX=9913 GN=AMELX PE=1 SV=2	1	hf1_10472_ebo_34_1_261219.ScanId;v=1;d1=25858.25858.4	controllerType=0 controllerNumber=1 scan=25858	52.1409
34277:4	1	S.MPLPPHPGHPGYINFS[+79.966]YEVLTPLKWYQ.S		S[+80]	816.152	4	3261.58	3261.56	0	6.5	17	Non	375.53	375.53	91.96	7.02	2376	>sp|P02817|AMELX_BOVIN Amelogenin, X isoform OS=Bos taurus OX=9913 GN=AMELX PE=1 SV=2	1	hf1_10472_ebo_34_1_261219.ScanId;v=1;d1=25464.25464.4	controllerType=0 controllerNumber=1 scan=25464	51.449
34568:4	1	S.MPLPPHPGHPGYINFS[+79.966]YEVLTPLKWYQ.S		S[+80]	816.152	4	3261.58	3261.56	0	6.7	17	Non	382.82	382.82	66.45	7.29	2376	>sp|P02817|AMELX_BOVIN Amelogenin, X isoform OS=Bos taurus OX=9913 GN=AMELX PE=1 SV=2	1	hf1_10472_ebo_34_1_261219.ScanId;v=1;d1=25657.25657.4	controllerType=0 controllerNumber=1 scan=25657	51.7893
31364:4	1	S.MP[+15.995]LPPHPGHPGYINFSYEVLTPLKWYQ.S		P[+16]	800.155	4	3197.6	3197.59	0	2.5	17	Non	420.76	363.23	5.8	5.54	2376	>sp|P02817|AMELX_BOVIN Amelogenin, X isoform OS=Bos taurus OX=9913 GN=AMELX PE=1 SV=2	1	hf1_10472_ebo_34_1_261219.ScanId;v=1;d1=23493.23493.4	controllerType=0 controllerNumber=1 scan=23493	48.0192
31049:4	1	S.MP[+15.995]LPPHPGHPGYINFSYEVLTPLKWYQ.S		P[+16]	800.158	4	3197.61	3197.59	0	5.8	17	Non	451.26	451.26	5.8	7.33	2376	>sp|P02817|AMELX_BOVIN Amelogenin, X isoform OS=Bos taurus OX=9913 GN=AMELX PE=1 SV=2	1	hf1_10472_ebo_34_1_261219.ScanId;v=1;d1=23290.23290.4	controllerType=0 controllerNumber=1 scan=23290	47.6713
34256:3	1	S.MPLPPHPGHPGYINFS[+79.966]YEVLTPLKWYQ.S		S[+80]	1087.87	3	3261.58	3261.56	0	5.4	17	Non	868.99	868.99	356.96	15.39	2376	>sp|P02817|AMELX_BOVIN Amelogenin, X isoform OS=Bos taurus OX=9913 GN=AMELX PE=1 SV=2	1	hf1_10472_ebo_34_1_261219.ScanId;v=1;d1=25450.25450.3	controllerType=0 controllerNumber=1 scan=25450	51.4238
34569:3	1	S.MPLPPHPGHPGYINFS[+79.966]YEVLTPLKWYQ.S		S[+80]	1087.87	3	3261.59	3261.56	0	7.2	17	Non	948.02	948.02	326.87	16.44	2376	>sp|P02817|AMELX_BOVIN Amelogenin, X isoform OS=Bos taurus OX=9913 GN=AMELX PE=1 SV=2	1	hf1_10472_ebo_34_1_261219.ScanId;v=1;d1=25658.25658.3	controllerType=0 controllerNumber=1 scan=25658	51.7909
35253:4	1	S.MPLPPHPGHPGYIN[+0.984]FS[+79.966]YEVLTPLKWYQ.S		N[+1], S[+80]	816.398	4	3262.57	3262.55	0	6.5	17	Non	113.6	113.6	19.49	1.63	2376	>sp|P02817|AMELX_BOVIN Amelogenin, X isoform OS=Bos taurus OX=9913 GN=AMELX PE=1 SV=2	1	hf1_10472_ebo_34_1_261219.ScanId;v=1;d1=26109.26109.4	controllerType=0 controllerNumber=1 scan=26109	52.5991
35154:4	1	S.MPLPPHPGHPGYINFS[+79.966]YEVLTPLKWYQ[+0.984].S		Q[+1], S[+80]	816.397	4	3262.57	3262.55	0	5.7	17	Non	206.48	206.48	47.15	3.33	2376	>sp|P02817|AMELX_BOVIN Amelogenin, X isoform OS=Bos taurus OX=9913 GN=AMELX PE=1 SV=2	1	hf1_10472_ebo_34_1_261219.ScanId;v=1;d1=26041.26041.4	controllerType=0 controllerNumber=1 scan=26041	52.4792
[truncated: 5,109 more rows]

## Sheet: Proteins
Protein Rank	Description	|Log Prob|	Best |Log Prob|	Best score	Total Intensity	# of spectra	# of unique peptides	# of mod peptides	Coverage %	# AA's in protein	Protein DB number
[truncated: 4 more rows]
