# Supplementary material for: A Peptidomics Method for Assessing Sex from Modern and Ancient Bovine Tooth Enamel.
Source: Research Square preprint supplement (doi:10.21203/rs.3.rs-3766361/v1), 2024-01-29
Supplement: Supplementary file 9 [file e202a60be33dde9a7b9d79ba.xlsx]

## Sheet: Summary
Summary:
	1) Input data file: H:\Proteomics\Projects\Boaretto\INCPM_18273\Raw_data\HF1_EB_18273_82_20032023.raw
	2) Protein database: H:\Proteomics\Projects\Boaretto\INCPM_18273\AMELs Cattle fasta Pau 2.Fasta
	3) Parameter file: D:\Boaretto\HF1_EB_18273_82_20032023.raw_20230416_Amel\objs\params.prf
	4) Date/Time: April 16, 2023 11:56:20 PM IDT
	5) RunTime: 1 hours, 3 minutes, 22 seconds; on 34 cores
Summary Statistics:
	1) Reporting 2 forward and 2 reverse proteins
	2) 1321 unique forward peptides
	3) 3538 spectra matched to forward peptides
	4) Estimated spectrum-level FDR on true proteins is 2.4%
Recorded protein search configuration:
Num	Rule	Value
0	Protein database	H:\Proteomics\Projects\Boaretto\INCPM_18273\AMELs Cattle fasta Pau 2.Fasta
1	Spectrum-level FDR	Auto cut
2	Cleavage residues	KR
3	Digest cutter	C-terminal cutter
4	Peptide termini	Non specific
5	Maximum number of missed cleavages	Any missed cleavages (-1)
6	Precursor tolerance	10.0 ppm
7	Fragment tolerance	frag:qtof_hcd 20.0 ppm
8	Fragment tolerance version	2
9	Charges applied to charge-unassigned spectra:	1,2,3
10	Precursor mass max	7500.0
11	N-glycan search	None
12	O-glycan search	None
13	Off by x isotopes	-2,-1,0,+1,+2
14	Contaminants added	false
15	Decoys added	true
16	%Additional parameters:
17	Disulfide Enable	false
18	Trisulfide Enable	false
19	DSS Crosslink Enable	false
20	Custom Crosslink Enable	false
21	Wildcard Enable	0
22	Combyne cut off score	Auto
23	Protein FDR cutoff	1%
24	Focused DB created	true
25	Export mzIdentML	true
26	Score version	2
27	precursor_assignment_flags	2
28	po_NumberMonosReturn	2
29	Lock mass list	None
30	do_quick_rejects	0
31	%Modification searches:
32	common_modifications_max	2
33	rare_modifications_max	2
34	%Fixed and variable modifications:
35	Oxidation / +15.994915 @ F, H, K, M, P, W, Y | common2
36	Deamidated / +0.984016 @ N, Q, R | common2
37	Acetyl / +42.010565 @ Protein NTerm | rare1
38	Dioxidation / +31.989829 @ F, M, P, W, Y | rare2
39	Gln->pyro-Glu / -17.026549 @ Protein NTerm Q | rare1
40	Glu->pyro-Glu / -18.010565 @ Protein NTerm E | rare1
41	Phospho / +79.966331 @ S | rare1
42	% Custom modification text below
43	%Glycan modifications:
44	% Custom modification text below
45	Show all N-glycopeptides	0
46	%Addition parameters:
47	Product Version	PMI-Byonic-Com:v4.6.1
48	Registered to	david Morgenstern G-INCPM

## Sheet: Spectra
Query #:z	Protein Rank	Peptide < ProteinMetrics Confidential >	Glycans NHFAGNa	Modification Type(s)	Observed m/z	z	Observed (M+H)	Calc. mass (M+H)	Off-by-x error	Mass error (ppm)	Starting position	Cleavage	Score	Delta	Delta Mod	|Log Prob|	# of unique peptides	Protein Name	Protein DB number	Comment	Scan #	Scan Time
09212:4	1	L.FACLLGAAFSMPLPPHPGH.P			491.499	4	1962.97	1962.97	0	0.6	7	Non	381.74	347.19	347.19	4.8	1125	>sp|P02817|AMELX_BOVIN Amelogenin, X isoform OS=Bos taurus OX=9913 GN=AMELX PE=1 SV=2	1	hf1_eb_18273_82_20032023.ScanId;v=1;d1=9652.9652.4	controllerType=0 controllerNumber=1 scan=9652	28.5052
14107:2	1	F.SMPLPPHP.G			438.225	2	875.443	875.444	0	-1.4	16	Non	197.12	78.25	78.25	0.58	1125	>sp|P02817|AMELX_BOVIN Amelogenin, X isoform OS=Bos taurus OX=9913 GN=AMELX PE=1 SV=2	1	hf1_eb_18273_82_20032023.ScanId;v=1;d1=13340.13340.2	controllerType=0 controllerNumber=1 scan=13340	35.3871
14398:2	1	F.SMPLPPHP.G			438.226	2	875.444	875.444	0	-0.4	16	Non	198.16	89.02	89.02	0.7	1125	>sp|P02817|AMELX_BOVIN Amelogenin, X isoform OS=Bos taurus OX=9913 GN=AMELX PE=1 SV=2	1	hf1_eb_18273_82_20032023.ScanId;v=1;d1=13555.13555.2	controllerType=0 controllerNumber=1 scan=13555	35.7954
14377:2	1	F.SMPLPPHP.G			438.225	2	875.443	875.444	0	-1	16	Non	229.66	116.18	116.18	1.29	1125	>sp|P02817|AMELX_BOVIN Amelogenin, X isoform OS=Bos taurus OX=9913 GN=AMELX PE=1 SV=2	1	hf1_eb_18273_82_20032023.ScanId;v=1;d1=13537.13537.2	controllerType=0 controllerNumber=1 scan=13537	35.7603
08283:2	1	F.SM[+15.995]PLPPHP.G		M[+16]	446.223	2	891.438	891.439	0	-1.6	16	Non	198.62	98.53	98.53	1.29	1125	>sp|P02817|AMELX_BOVIN Amelogenin, X isoform OS=Bos taurus OX=9913 GN=AMELX PE=1 SV=2	1	hf1_eb_18273_82_20032023.ScanId;v=1;d1=8904.8904.2	controllerType=0 controllerNumber=1 scan=8904	27.0205
08050:2	1	F.SM[+15.995]PLPPHP.G		M[+16]	446.223	2	891.438	891.439	0	-1.2	16	Non	232.32	106.31	106.31	1.29	1125	>sp|P02817|AMELX_BOVIN Amelogenin, X isoform OS=Bos taurus OX=9913 GN=AMELX PE=1 SV=2	1	hf1_eb_18273_82_20032023.ScanId;v=1;d1=8724.8724.2	controllerType=0 controllerNumber=1 scan=8724	26.6707
08856:2	1	F.SM[+15.995]PLPPHP.G		M[+16]	446.223	2	891.438	891.439	0	-1.6	16	Non	244.23	151.45	151.45	2.51	1125	>sp|P02817|AMELX_BOVIN Amelogenin, X isoform OS=Bos taurus OX=9913 GN=AMELX PE=1 SV=2	1	hf1_eb_18273_82_20032023.ScanId;v=1;d1=9369.9369.2	controllerType=0 controllerNumber=1 scan=9369	27.9419
08502:2	1	F.SM[+15.995]PLPPHP.G		M[+16]	446.223	2	891.438	891.439	0	-1.7	16	Non	263.09	121.34	121.34	2.89	1125	>sp|P02817|AMELX_BOVIN Amelogenin, X isoform OS=Bos taurus OX=9913 GN=AMELX PE=1 SV=2	1	hf1_eb_18273_82_20032023.ScanId;v=1;d1=9084.9084.2	controllerType=0 controllerNumber=1 scan=9084	27.3696
09040:2	1	F.SM[+15.995]P[+15.995]LPPHP.G		M[+16], P[+16]	454.22	2	907.433	907.434	0	-1.3	16	Non	117.7	117.7	11.05	0.32	1125	>sp|P02817|AMELX_BOVIN Amelogenin, X isoform OS=Bos taurus OX=9913 GN=AMELX PE=1 SV=2	1	hf1_eb_18273_82_20032023.ScanId;v=1;d1=9515.9515.2	controllerType=0 controllerNumber=1 scan=9515	28.238
08169:2	1	F.SMPLPPHPG.H			466.736	2	932.465	932.466	0	-1	16	Non	165.39	165.39	165.39	1.36	1125	>sp|P02817|AMELX_BOVIN Amelogenin, X isoform OS=Bos taurus OX=9913 GN=AMELX PE=1 SV=2	1	hf1_eb_18273_82_20032023.ScanId;v=1;d1=8818.8818.2	controllerType=0 controllerNumber=1 scan=8818	26.8494
13284:2	1	F.SMPLPPHPG.H			466.735	2	932.464	932.466	0	-2.4	16	Non	216.75	157.35	157.35	1.15	1125	>sp|P02817|AMELX_BOVIN Amelogenin, X isoform OS=Bos taurus OX=9913 GN=AMELX PE=1 SV=2	1	hf1_eb_18273_82_20032023.ScanId;v=1;d1=12727.12727.2	controllerType=0 controllerNumber=1 scan=12727	34.2782
13538:2	1	F.SMPLPPHPG.H			466.736	2	932.465	932.466	0	-1.4	16	Non	232.11	162.64	162.64	2.2	1125	>sp|P02817|AMELX_BOVIN Amelogenin, X isoform OS=Bos taurus OX=9913 GN=AMELX PE=1 SV=2	1	hf1_eb_18273_82_20032023.ScanId;v=1;d1=12920.12920.2	controllerType=0 controllerNumber=1 scan=12920	34.6261
07223:2	1	F.SM[+15.995]PLPPHPG.H		M[+16]	474.733	2	948.459	948.461	0	-2	16	Non	271.04	271.04	167.32	3.57	1125	>sp|P02817|AMELX_BOVIN Amelogenin, X isoform OS=Bos taurus OX=9913 GN=AMELX PE=1 SV=2	1	hf1_eb_18273_82_20032023.ScanId;v=1;d1=8066.8066.2	controllerType=0 controllerNumber=1 scan=8066	25.3049
07420:2	1	F.SM[+15.995]PLPPHPG.H		M[+16]	474.734	2	948.46	948.461	0	-0.7	16	Non	320.85	320.85	183.4	4.82	1125	>sp|P02817|AMELX_BOVIN Amelogenin, X isoform OS=Bos taurus OX=9913 GN=AMELX PE=1 SV=2	1	hf1_eb_18273_82_20032023.ScanId;v=1;d1=8221.8221.2	controllerType=0 controllerNumber=1 scan=8221	25.6468
06309:3	1	F.SM[+15.995]PLPPHPGHP.G		M[+16]	394.862	3	1182.57	1182.57	0	-0.8	16	Non	141.19	139.81	31.34	0.62	1125	>sp|P02817|AMELX_BOVIN Amelogenin, X isoform OS=Bos taurus OX=9913 GN=AMELX PE=1 SV=2	1	hf1_eb_18273_82_20032023.ScanId;v=1;d1=7323.7323.2	controllerType=0 controllerNumber=1 scan=7323	23.7588
06797:3	1	F.SM[+15.995]PLPPHPGHP.G		M[+16]	394.862	3	1182.57	1182.57	0	-1.1	16	Non	203.01	112.7	30.87	0.92	1125	>sp|P02817|AMELX_BOVIN Amelogenin, X isoform OS=Bos taurus OX=9913 GN=AMELX PE=1 SV=2	1	hf1_eb_18273_82_20032023.ScanId;v=1;d1=7720.7720.3	controllerType=0 controllerNumber=1 scan=7720	24.5861
05772:3	1	F.SM[+15.995]PLPPHPGHPG.Y		M[+16]	413.868	3	1239.59	1239.59	0	-2.5	16	Non	215.45	215.45	41.3	2.56	1125	>sp|P02817|AMELX_BOVIN Amelogenin, X isoform OS=Bos taurus OX=9913 GN=AMELX PE=1 SV=2	1	hf1_eb_18273_82_20032023.ScanId;v=1;d1=6879.6879.2	controllerType=0 controllerNumber=1 scan=6879	22.849
05887:3	1	F.SM[+15.995]PLPPHPGHPG.Y		M[+16]	413.869	3	1239.59	1239.59	0	-1.8	16	Non	230.32	230.32	40.83	2.84	1125	>sp|P02817|AMELX_BOVIN Amelogenin, X isoform OS=Bos taurus OX=9913 GN=AMELX PE=1 SV=2	1	hf1_eb_18273_82_20032023.ScanId;v=1;d1=6980.6980.3	controllerType=0 controllerNumber=1 scan=6980	23.0783
20017:3	1	F.SM[+15.995]PLPPHPGHPGYIN[+0.984]F.S		M[+16], N[+1]	593.283	3	1777.83	1777.84	0	-1.2	16	Non	168.91	152.43	39.94	2.21	1125	>sp|P02817|AMELX_BOVIN Amelogenin, X isoform OS=Bos taurus OX=9913 GN=AMELX PE=1 SV=2	1	hf1_eb_18273_82_20032023.ScanId;v=1;d1=17671.17671.3	controllerType=0 controllerNumber=1 scan=17671	43.2218
19755:3	1	F.SM[+15.995]PLPPHPGHPGYIN[+0.984]F.S		M[+16], N[+1]	593.283	3	1777.84	1777.84	0	-0.8	16	Non	187.56	163.16	72.65	2.59	1125	>sp|P02817|AMELX_BOVIN Amelogenin, X isoform OS=Bos taurus OX=9913 GN=AMELX PE=1 SV=2	1	hf1_eb_18273_82_20032023.ScanId;v=1;d1=17479.17479.3	controllerType=0 controllerNumber=1 scan=17479	42.8749
19249:3	1	F.SM[+15.995]PLPPHPGHPGYIN[+0.984]F.S		M[+16], N[+1]	593.283	3	1777.83	1777.84	0	-1	16	Non	196.67	183.22	76.53	2.98	1125	>sp|P02817|AMELX_BOVIN Amelogenin, X isoform OS=Bos taurus OX=9913 GN=AMELX PE=1 SV=2	1	hf1_eb_18273_82_20032023.ScanId;v=1;d1=17100.17100.3	controllerType=0 controllerNumber=1 scan=17100	42.1687
19491:3	1	F.SM[+15.995]PLPPHPGHPGYIN[+0.984]F.S		M[+16], N[+1]	593.283	3	1777.83	1777.84	0	-1.4	16	Non	284.24	281.15	52.93	5.4	1125	>sp|P02817|AMELX_BOVIN Amelogenin, X isoform OS=Bos taurus OX=9913 GN=AMELX PE=1 SV=2	1	hf1_eb_18273_82_20032023.ScanId;v=1;d1=17286.17286.3	controllerType=0 controllerNumber=1 scan=17286	42.5169
05629:1	1	S.M[+15.995]PLPPH.P		M[+16]	707.354	1	707.354	707.355	0	-0.5	17	Non	279.43	270.37	46.46	4.37	1125	>sp|P02817|AMELX_BOVIN Amelogenin, X isoform OS=Bos taurus OX=9913 GN=AMELX PE=1 SV=2	1	hf1_eb_18273_82_20032023.ScanId;v=1;d1=6757.6757.2	controllerType=0 controllerNumber=1 scan=6757	22.5817
14384:2	1	S.MPLPPHP.G			394.71	2	788.412	788.412	0	-0.3	17	Non	323.09	215.65	215.65	3.85	1125	>sp|P02817|AMELX_BOVIN Amelogenin, X isoform OS=Bos taurus OX=9913 GN=AMELX PE=1 SV=2	1	hf1_eb_18273_82_20032023.ScanId;v=1;d1=13543.13543.2	controllerType=0 controllerNumber=1 scan=13543	35.7736
14127:2	1	S.MPLPPHP.G			394.71	2	788.412	788.412	0	-0.6	17	Non	375.88	203.54	203.54	4.54	1125	>sp|P02817|AMELX_BOVIN Amelogenin, X isoform OS=Bos taurus OX=9913 GN=AMELX PE=1 SV=2	1	hf1_eb_18273_82_20032023.ScanId;v=1;d1=13356.13356.2	controllerType=0 controllerNumber=1 scan=13356	35.4185
13116:2	1	S.MPLPPHP.G			394.71	2	788.412	788.412	0	-0.4	17	Non	394.18	216.98	216.98	4.42	1125	>sp|P02817|AMELX_BOVIN Amelogenin, X isoform OS=Bos taurus OX=9913 GN=AMELX PE=1 SV=2	1	hf1_eb_18273_82_20032023.ScanId;v=1;d1=12597.12597.2	controllerType=0 controllerNumber=1 scan=12597	34.0386
13630:2	1	S.MPLPPHP.G			394.71	2	788.412	788.412	0	-0.4	17	Non	397.1	217.56	217.56	4.42	1125	>sp|P02817|AMELX_BOVIN Amelogenin, X isoform OS=Bos taurus OX=9913 GN=AMELX PE=1 SV=2	1	hf1_eb_18273_82_20032023.ScanId;v=1;d1=12987.12987.2	controllerType=0 controllerNumber=1 scan=12987	34.7415
13371:2	1	S.MPLPPHP.G			394.709	2	788.412	788.412	0	-0.8	17	Non	409.23	202.4	202.4	4.53	1125	>sp|P02817|AMELX_BOVIN Amelogenin, X isoform OS=Bos taurus OX=9913 GN=AMELX PE=1 SV=2	1	hf1_eb_18273_82_20032023.ScanId;v=1;d1=12791.12791.2	controllerType=0 controllerNumber=1 scan=12791	34.3932
13878:2	1	S.MPLPPHP.G			394.709	2	788.411	788.412	0	-1.3	17	Non	409.95	195.24	195.24	3.71	1125	>sp|P02817|AMELX_BOVIN Amelogenin, X isoform OS=Bos taurus OX=9913 GN=AMELX PE=1 SV=2	1	hf1_eb_18273_82_20032023.ScanId;v=1;d1=13170.13170.2	controllerType=0 controllerNumber=1 scan=13170	35.0823
11818:2	1	S.M[+15.995]PLPPHP.G		M[+16]	402.706	2	804.405	804.407	0	-3.3	17	Non	167.25	122.33	42.96	0.63	1125	>sp|P02817|AMELX_BOVIN Amelogenin, X isoform OS=Bos taurus OX=9913 GN=AMELX PE=1 SV=2	1	hf1_eb_18273_82_20032023.ScanId;v=1;d1=11630.11630.2	controllerType=0 controllerNumber=1 scan=11630	32.2325
11534:2	1	S.M[+15.995]PLPPHP.G		M[+16]	402.707	2	804.406	804.407	0	-1.1	17	Non	203.5	75.81	38.05	0.58	1125	>sp|P02817|AMELX_BOVIN Amelogenin, X isoform OS=Bos taurus OX=9913 GN=AMELX PE=1 SV=2	1	hf1_eb_18273_82_20032023.ScanId;v=1;d1=11421.11421.2	controllerType=0 controllerNumber=1 scan=11421	31.8377
12212:2	1	S.M[+15.995]PLPPHP.G		M[+16]	402.707	2	804.408	804.407	0	0.4	17	Non	233.9	85.58	27.02	0.67	1125	>sp|P02817|AMELX_BOVIN Amelogenin, X isoform OS=Bos taurus OX=9913 GN=AMELX PE=1 SV=2	1	hf1_eb_18273_82_20032023.ScanId;v=1;d1=11927.11927.2	controllerType=0 controllerNumber=1 scan=11927	32.7973
06856:2	1	S.M[+15.995]PLPPHP.G		M[+16]	402.707	2	804.406	804.407	0	-1.6	17	Non	234.25	12.43	12.43	0.7	1125	>sp|P02817|AMELX_BOVIN Amelogenin, X isoform OS=Bos taurus OX=9913 GN=AMELX PE=1 SV=2	1	hf1_eb_18273_82_20032023.ScanId;v=1;d1=7768.7768.2	controllerType=0 controllerNumber=1 scan=7768	24.6925
10530:2	1	S.M[+15.995]PLPPHP.G		M[+16]	402.707	2	804.407	804.407	0	0	17	Non	244.02	105.9	60.95	2.36	1125	>sp|P02817|AMELX_BOVIN Amelogenin, X isoform OS=Bos taurus OX=9913 GN=AMELX PE=1 SV=2	1	hf1_eb_18273_82_20032023.ScanId;v=1;d1=10656.10656.2	controllerType=0 controllerNumber=1 scan=10656	30.4082
09171:1	1	S.M[+15.995]PLPPHP.G		M[+16]	804.408	1	804.408	804.407	0	0.4	17	Non	249.1	208.22	29.52	4.75	1125	>sp|P02817|AMELX_BOVIN Amelogenin, X isoform OS=Bos taurus OX=9913 GN=AMELX PE=1 SV=2	1	hf1_eb_18273_82_20032023.ScanId;v=1;d1=9621.9621.3	controllerType=0 controllerNumber=1 scan=9621	28.4347
09747:2	1	S.M[+31.990]PLPPHP.G		M[+32]	410.704	2	820.401	820.402	0	-1	17	Non	273.77	198.56	16.59	3.47	1125	>sp|P02817|AMELX_BOVIN Amelogenin, X isoform OS=Bos taurus OX=9913 GN=AMELX PE=1 SV=2	1	hf1_eb_18273_82_20032023.ScanId;v=1;d1=10054.10054.2	controllerType=0 controllerNumber=1 scan=10054	29.2644
10281:2	1	S.M[+15.995]PLPPHP.G		M[+16]	402.707	2	804.407	804.407	0	-0.8	17	Non	276.03	89.04	62.54	2.36	1125	>sp|P02817|AMELX_BOVIN Amelogenin, X isoform OS=Bos taurus OX=9913 GN=AMELX PE=1 SV=2	1	hf1_eb_18273_82_20032023.ScanId;v=1;d1=10465.10465.2	controllerType=0 controllerNumber=1 scan=10465	30.0592
09802:2	1	S.M[+15.995]PLPPHP.G		M[+16]	402.707	2	804.407	804.407	0	-0.8	17	Non	313.06	145.67	72.68	3.01	1125	>sp|P02817|AMELX_BOVIN Amelogenin, X isoform OS=Bos taurus OX=9913 GN=AMELX PE=1 SV=2	1	hf1_eb_18273_82_20032023.ScanId;v=1;d1=10099.10099.2	controllerType=0 controllerNumber=1 scan=10099	29.3526
11095:2	1	S.M[+15.995]PLPPHP.G		M[+16]	402.707	2	804.407	804.407	0	-0.5	17	Non	317.33	159.78	67.79	3.01	1125	>sp|P02817|AMELX_BOVIN Amelogenin, X isoform OS=Bos taurus OX=9913 GN=AMELX PE=1 SV=2	1	hf1_eb_18273_82_20032023.ScanId;v=1;d1=11088.11088.2	controllerType=0 controllerNumber=1 scan=11088	31.2197
06695:2	1	S.M[+15.995]PLPPHP.G		M[+16]	402.707	2	804.406	804.407	0	-1.7	17	Non	322.75	109	64.15	3.19	1125	>sp|P02817|AMELX_BOVIN Amelogenin, X isoform OS=Bos taurus OX=9913 GN=AMELX PE=1 SV=2	1	hf1_eb_18273_82_20032023.ScanId;v=1;d1=7634.7634.2	controllerType=0 controllerNumber=1 scan=7634	24.3852
10702:2	1	S.M[+31.990]PLPPHP.G		M[+32]	410.705	2	820.402	820.402	0	-0.1	17	Non	327.73	207.62	14.09	3.39	1125	>sp|P02817|AMELX_BOVIN Amelogenin, X isoform OS=Bos taurus OX=9913 GN=AMELX PE=1 SV=2	1	hf1_eb_18273_82_20032023.ScanId;v=1;d1=10787.10787.2	controllerType=0 controllerNumber=1 scan=10787	30.6553
09981:2	1	S.M[+31.990]PLPPHP.G		M[+32]	410.704	2	820.402	820.402	0	-0.6	17	Non	334.31	247.05	36.52	4.56	1125	>sp|P02817|AMELX_BOVIN Amelogenin, X isoform OS=Bos taurus OX=9913 GN=AMELX PE=1 SV=2	1	hf1_eb_18273_82_20032023.ScanId;v=1;d1=10239.10239.2	controllerType=0 controllerNumber=1 scan=10239	29.6209
10207:2	1	S.M[+31.990]PLPPHP.G		M[+32]	410.704	2	820.401	820.402	0	-1.2	17	Non	337.72	207.55	18.17	3.85	1125	>sp|P02817|AMELX_BOVIN Amelogenin, X isoform OS=Bos taurus OX=9913 GN=AMELX PE=1 SV=2	1	hf1_eb_18273_82_20032023.ScanId;v=1;d1=10412.10412.2	controllerType=0 controllerNumber=1 scan=10412	29.9638
10449:2	1	S.M[+31.990]PLPPHP.G		M[+32]	410.705	2	820.402	820.402	0	-0.1	17	Non	346.51	224.13	17.43	3.85	1125	>sp|P02817|AMELX_BOVIN Amelogenin, X isoform OS=Bos taurus OX=9913 GN=AMELX PE=1 SV=2	1	hf1_eb_18273_82_20032023.ScanId;v=1;d1=10598.10598.2	controllerType=0 controllerNumber=1 scan=10598	30.308
07595:2	1	S.M[+15.995]PLPPHP.G		M[+16]	402.707	2	804.406	804.407	0	-1.4	17	Non	366.33	169.08	82.75	4.16	1125	>sp|P02817|AMELX_BOVIN Amelogenin, X isoform OS=Bos taurus OX=9913 GN=AMELX PE=1 SV=2	1	hf1_eb_18273_82_20032023.ScanId;v=1;d1=8360.8360.2	controllerType=0 controllerNumber=1 scan=8360	25.925
10033:2	1	S.M[+15.995]PLPPHP.G		M[+16]	402.707	2	804.407	804.407	0	-0.8	17	Non	383.77	187.77	62.2	4.28	1125	>sp|P02817|AMELX_BOVIN Amelogenin, X isoform OS=Bos taurus OX=9913 GN=AMELX PE=1 SV=2	1	hf1_eb_18273_82_20032023.ScanId;v=1;d1=10279.10279.2	controllerType=0 controllerNumber=1 scan=10279	29.6974
07812:2	1	S.M[+15.995]PLPPHP.G		M[+16]	402.707	2	804.407	804.407	0	-0.7	17	Non	411.27	208.73	91.27	4.64	1125	>sp|P02817|AMELX_BOVIN Amelogenin, X isoform OS=Bos taurus OX=9913 GN=AMELX PE=1 SV=2	1	hf1_eb_18273_82_20032023.ScanId;v=1;d1=8534.8534.2	controllerType=0 controllerNumber=1 scan=8534	26.2699
08684:2	1	S.M[+15.995]PLPPHP.G		M[+16]	402.707	2	804.407	804.407	0	-0.2	17	Non	420.74	273.26	81.49	4.8	1125	>sp|P02817|AMELX_BOVIN Amelogenin, X isoform OS=Bos taurus OX=9913 GN=AMELX PE=1 SV=2	1	hf1_eb_18273_82_20032023.ScanId;v=1;d1=9223.9223.2	controllerType=0 controllerNumber=1 scan=9223	27.6438
08238:2	1	S.M[+15.995]PLPPHP.G		M[+16]	402.707	2	804.407	804.407	0	-0.2	17	Non	435.18	246.28	98.63	4.8	1125	>sp|P02817|AMELX_BOVIN Amelogenin, X isoform OS=Bos taurus OX=9913 GN=AMELX PE=1 SV=2	1	hf1_eb_18273_82_20032023.ScanId;v=1;d1=8871.8871.2	controllerType=0 controllerNumber=1 scan=8871	26.9564
08014:2	1	S.M[+15.995]PLPPHP.G		M[+16]	402.707	2	804.408	804.407	0	0.3	17	Non	441.09	267.93	96.54	5.22	1125	>sp|P02817|AMELX_BOVIN Amelogenin, X isoform OS=Bos taurus OX=9913 GN=AMELX PE=1 SV=2	1	hf1_eb_18273_82_20032023.ScanId;v=1;d1=8698.8698.2	controllerType=0 controllerNumber=1 scan=8698	26.6097
08881:2	1	S.M[+15.995]PLPPHP.G		M[+16]	402.707	2	804.407	804.407	0	-0.6	17	Non	442.07	283.61	83.18	5.36	1125	>sp|P02817|AMELX_BOVIN Amelogenin, X isoform OS=Bos taurus OX=9913 GN=AMELX PE=1 SV=2	1	hf1_eb_18273_82_20032023.ScanId;v=1;d1=9389.9389.2	controllerType=0 controllerNumber=1 scan=9389	27.9808
08458:2	1	S.M[+15.995]PLPPHP.G		M[+16]	402.707	2	804.407	804.407	0	-0.4	17	Non	448.62	311.62	96.19	4.95	1125	>sp|P02817|AMELX_BOVIN Amelogenin, X isoform OS=Bos taurus OX=9913 GN=AMELX PE=1 SV=2	1	hf1_eb_18273_82_20032023.ScanId;v=1;d1=9049.9049.2	controllerType=0 controllerNumber=1 scan=9049	27.3017
13180:1	1	S.MPLPPHPG.H			845.434	1	845.434	845.434	0	0.5	17	Non	215.44	215.44	215.44	3.04	1125	>sp|P02817|AMELX_BOVIN Amelogenin, X isoform OS=Bos taurus OX=9913 GN=AMELX PE=1 SV=2	1	hf1_eb_18273_82_20032023.ScanId;v=1;d1=12647.12647.2	controllerType=0 controllerNumber=1 scan=12647	34.1328
11957:1	1	S.MPLPPHPG.H			845.433	1	845.433	845.434	0	-1.6	17	Non	291.02	248.09	248.09	4.55	1125	>sp|P02817|AMELX_BOVIN Amelogenin, X isoform OS=Bos taurus OX=9913 GN=AMELX PE=1 SV=2	1	hf1_eb_18273_82_20032023.ScanId;v=1;d1=11731.11731.2	controllerType=0 controllerNumber=1 scan=11731	32.4199
12188:1	1	S.MPLPPHPG.H			845.433	1	845.433	845.434	0	-0.3	17	Non	309.46	306.9	306.9	5.23	1125	>sp|P02817|AMELX_BOVIN Amelogenin, X isoform OS=Bos taurus OX=9913 GN=AMELX PE=1 SV=2	1	hf1_eb_18273_82_20032023.ScanId;v=1;d1=11909.11909.2	controllerType=0 controllerNumber=1 scan=11909	32.7622
11716:2	1	S.MPLPPHPG.H			423.22	2	845.433	845.434	0	-1.4	17	Non	347.82	342.07	342.07	4.26	1125	>sp|P02817|AMELX_BOVIN Amelogenin, X isoform OS=Bos taurus OX=9913 GN=AMELX PE=1 SV=2	1	hf1_eb_18273_82_20032023.ScanId;v=1;d1=11550.11550.2	controllerType=0 controllerNumber=1 scan=11550	32.0743
13563:2	1	S.MPLPPHPG.H			423.22	2	845.433	845.434	0	-0.8	17	Non	348.53	339.68	339.68	4.26	1125	>sp|P02817|AMELX_BOVIN Amelogenin, X isoform OS=Bos taurus OX=9913 GN=AMELX PE=1 SV=2	1	hf1_eb_18273_82_20032023.ScanId;v=1;d1=12940.12940.2	controllerType=0 controllerNumber=1 scan=12940	34.6586
12831:1	1	S.MPLPPHPG.H			845.433	1	845.433	845.434	0	-1.3	17	Non	357.15	342.36	342.36	5.3	1125	>sp|P02817|AMELX_BOVIN Amelogenin, X isoform OS=Bos taurus OX=9913 GN=AMELX PE=1 SV=2	1	hf1_eb_18273_82_20032023.ScanId;v=1;d1=12385.12385.2	controllerType=0 controllerNumber=1 scan=12385	33.6569
12544:1	1	S.MPLPPHPG.H			845.433	1	845.433	845.434	0	-0.8	17	Non	366.03	311.96	311.96	4.78	1125	>sp|P02817|AMELX_BOVIN Amelogenin, X isoform OS=Bos taurus OX=9913 GN=AMELX PE=1 SV=2	1	hf1_eb_18273_82_20032023.ScanId;v=1;d1=12177.12177.2	controllerType=0 controllerNumber=1 scan=12177	33.2728
12937:2	1	S.MPLPPHPG.H			423.22	2	845.433	845.434	0	-0.5	17	Non	396.84	388.18	388.18	5.53	1125	>sp|P02817|AMELX_BOVIN Amelogenin, X isoform OS=Bos taurus OX=9913 GN=AMELX PE=1 SV=2	1	hf1_eb_18273_82_20032023.ScanId;v=1;d1=12462.12462.2	controllerType=0 controllerNumber=1 scan=12462	33.7927
13184:2	1	S.MPLPPHPG.H			423.22	2	845.433	845.434	0	-1.4	17	Non	400.99	400.99	400.99	5.51	1125	>sp|P02817|AMELX_BOVIN Amelogenin, X isoform OS=Bos taurus OX=9913 GN=AMELX PE=1 SV=2	1	hf1_eb_18273_82_20032023.ScanId;v=1;d1=12650.12650.2	controllerType=0 controllerNumber=1 scan=12650	34.1401
12675:2	1	S.MPLPPHPG.H			423.22	2	845.433	845.434	0	-0.5	17	Non	408.79	356.1	356.1	4.82	1125	>sp|P02817|AMELX_BOVIN Amelogenin, X isoform OS=Bos taurus OX=9913 GN=AMELX PE=1 SV=2	1	hf1_eb_18273_82_20032023.ScanId;v=1;d1=12275.12275.2	controllerType=0 controllerNumber=1 scan=12275	33.4544
11953:2	1	S.MPLPPHPG.H			423.22	2	845.433	845.434	0	-1.5	17	Non	414.89	382.24	382.24	5.74	1125	>sp|P02817|AMELX_BOVIN Amelogenin, X isoform OS=Bos taurus OX=9913 GN=AMELX PE=1 SV=2	1	hf1_eb_18273_82_20032023.ScanId;v=1;d1=11728.11728.2	controllerType=0 controllerNumber=1 scan=11728	32.4148
12418:2	1	S.MPLPPHPG.H			423.221	2	845.434	845.434	0	-0.1	17	Non	428.6	428.6	428.6	6.16	1125	>sp|P02817|AMELX_BOVIN Amelogenin, X isoform OS=Bos taurus OX=9913 GN=AMELX PE=1 SV=2	1	hf1_eb_18273_82_20032023.ScanId;v=1;d1=12088.12088.2	controllerType=0 controllerNumber=1 scan=12088	33.1097
12186:2	1	S.MPLPPHPG.H			423.22	2	845.433	845.434	0	-0.4	17	Non	432.22	394.18	394.18	5.74	1125	>sp|P02817|AMELX_BOVIN Amelogenin, X isoform OS=Bos taurus OX=9913 GN=AMELX PE=1 SV=2	1	hf1_eb_18273_82_20032023.ScanId;v=1;d1=11907.11907.2	controllerType=0 controllerNumber=1 scan=11907	32.7608
37469:2	1	S.MP[+15.995]LPPHPG.H		P[+16]	431.218	2	861.428	861.429	0	-0.5	17	Non	65.8	65.8	4	1.04	1125	>sp|P02817|AMELX_BOVIN Amelogenin, X isoform OS=Bos taurus OX=9913 GN=AMELX PE=1 SV=2	1	hf1_eb_18273_82_20032023.ScanId;v=1;d1=31452.31452.2	controllerType=0 controllerNumber=1 scan=31452	74.3387
37437:2	1	S.M[+15.995]PLPPHPG.H		M[+16]	431.218	2	861.429	861.429	0	-0.2	17	Non	134.79	134.79	27.07	2.39	1125	>sp|P02817|AMELX_BOVIN Amelogenin, X isoform OS=Bos taurus OX=9913 GN=AMELX PE=1 SV=2	1	hf1_eb_18273_82_20032023.ScanId;v=1;d1=31385.31385.2	controllerType=0 controllerNumber=1 scan=31385	73.9959
37302:2	1	S.M[+15.995]PLPPHPG.H		M[+16]	431.219	2	861.43	861.429	0	1.4	17	Non	175.49	175.49	28.13	2.87	1125	>sp|P02817|AMELX_BOVIN Amelogenin, X isoform OS=Bos taurus OX=9913 GN=AMELX PE=1 SV=2	1	hf1_eb_18273_82_20032023.ScanId;v=1;d1=31222.31222.2	controllerType=0 controllerNumber=1 scan=31222	73.3178
37372:2	1	S.M[+15.995]PLPPHPG.H		M[+16]	431.218	2	861.429	861.429	0	0.9	17	Non	224.12	224.12	103.01	3	1125	>sp|P02817|AMELX_BOVIN Amelogenin, X isoform OS=Bos taurus OX=9913 GN=AMELX PE=1 SV=2	1	hf1_eb_18273_82_20032023.ScanId;v=1;d1=31306.31306.2	controllerType=0 controllerNumber=1 scan=31306	73.6571
10260:2	1	S.M[+15.995]PLPPHPG.H		M[+16]	431.217	2	861.428	861.429	0	-1.3	17	Non	229.58	161.15	34.69	2.2	1125	>sp|P02817|AMELX_BOVIN Amelogenin, X isoform OS=Bos taurus OX=9913 GN=AMELX PE=1 SV=2	1	hf1_eb_18273_82_20032023.ScanId;v=1;d1=10449.10449.2	controllerType=0 controllerNumber=1 scan=10449	30.0288
09306:2	1	S.M[+15.995]PLPPHPG.H		M[+16]	431.218	2	861.429	861.429	0	0.2	17	Non	309.15	223.92	52.84	4.44	1125	>sp|P02817|AMELX_BOVIN Amelogenin, X isoform OS=Bos taurus OX=9913 GN=AMELX PE=1 SV=2	1	hf1_eb_18273_82_20032023.ScanId;v=1;d1=9725.9725.2	controllerType=0 controllerNumber=1 scan=9725	28.6486
09183:2	1	S.M[+31.990]PLPPHPG.H		M[+32]	439.214	2	877.421	877.424	0	-2.7	17	Non	331.57	282.45	15.33	3.81	1125	>sp|P02817|AMELX_BOVIN Amelogenin, X isoform OS=Bos taurus OX=9913 GN=AMELX PE=1 SV=2	1	hf1_eb_18273_82_20032023.ScanId;v=1;d1=9629.9629.2	controllerType=0 controllerNumber=1 scan=9629	28.4482
09430:2	1	S.M[+31.990]PLPPHPG.H		M[+32]	439.214	2	877.422	877.424	0	-2.2	17	Non	349.87	289.73	33.41	3.81	1125	>sp|P02817|AMELX_BOVIN Amelogenin, X isoform OS=Bos taurus OX=9913 GN=AMELX PE=1 SV=2	1	hf1_eb_18273_82_20032023.ScanId;v=1;d1=9821.9821.3	controllerType=0 controllerNumber=1 scan=9821	28.827
08994:2	1	S.M[+15.995]PLPPHPG.H		M[+16]	431.217	2	861.428	861.429	0	-1.3	17	Non	356.88	249.88	73.19	4.59	1125	>sp|P02817|AMELX_BOVIN Amelogenin, X isoform OS=Bos taurus OX=9913 GN=AMELX PE=1 SV=2	1	hf1_eb_18273_82_20032023.ScanId;v=1;d1=9476.9476.2	controllerType=0 controllerNumber=1 scan=9476	28.1523
06151:2	1	S.M[+15.995]PLPPHPG.H		M[+16]	431.217	2	861.428	861.429	0	-1.2	17	Non	361.48	297.85	63.26	4.85	1125	>sp|P02817|AMELX_BOVIN Amelogenin, X isoform OS=Bos taurus OX=9913 GN=AMELX PE=1 SV=2	1	hf1_eb_18273_82_20032023.ScanId;v=1;d1=7200.7200.2	controllerType=0 controllerNumber=1 scan=7200	23.5175
10017:2	1	S.M[+15.995]PLPPHPG.H		M[+16]	431.218	2	861.428	861.429	0	-1	17	Non	364.03	338.45	76.54	4.96	1125	>sp|P02817|AMELX_BOVIN Amelogenin, X isoform OS=Bos taurus OX=9913 GN=AMELX PE=1 SV=2	1	hf1_eb_18273_82_20032023.ScanId;v=1;d1=10267.10267.2	controllerType=0 controllerNumber=1 scan=10267	29.6777
09551:2	1	S.M[+15.995]PLPPHPG.H		M[+16]	431.218	2	861.428	861.429	0	-0.5	17	Non	368.8	278.84	73.77	4.73	1125	>sp|P02817|AMELX_BOVIN Amelogenin, X isoform OS=Bos taurus OX=9913 GN=AMELX PE=1 SV=2	1	hf1_eb_18273_82_20032023.ScanId;v=1;d1=9909.9909.2	controllerType=0 controllerNumber=1 scan=9909	28.9889
07221:2	1	S.M[+15.995]PLPPHPG.H		M[+16]	431.218	2	861.428	861.429	0	-0.5	17	Non	392.68	392.68	83.51	6.18	1125	>sp|P02817|AMELX_BOVIN Amelogenin, X isoform OS=Bos taurus OX=9913 GN=AMELX PE=1 SV=2	1	hf1_eb_18273_82_20032023.ScanId;v=1;d1=8064.8064.2	controllerType=0 controllerNumber=1 scan=8064	25.3033
08776:2	1	S.M[+15.995]PLPPHPG.H		M[+16]	431.217	2	861.428	861.429	0	-1.1	17	Non	396.14	255.11	78.41	4.73	1125	>sp|P02817|AMELX_BOVIN Amelogenin, X isoform OS=Bos taurus OX=9913 GN=AMELX PE=1 SV=2	1	hf1_eb_18273_82_20032023.ScanId;v=1;d1=9305.9305.2	controllerType=0 controllerNumber=1 scan=9305	27.808
06817:2	1	S.M[+15.995]PLPPHPG.H		M[+16]	431.217	2	861.427	861.429	0	-2	17	Non	402.52	360.5	83.72	5.16	1125	>sp|P02817|AMELX_BOVIN Amelogenin, X isoform OS=Bos taurus OX=9913 GN=AMELX PE=1 SV=2	1	hf1_eb_18273_82_20032023.ScanId;v=1;d1=7735.7735.2	controllerType=0 controllerNumber=1 scan=7735	24.6205
08365:2	1	S.M[+15.995]PLPPHPG.H		M[+16]	431.218	2	861.428	861.429	0	-1	17	Non	416.41	345.97	82.81	5.05	1125	>sp|P02817|AMELX_BOVIN Amelogenin, X isoform OS=Bos taurus OX=9913 GN=AMELX PE=1 SV=2	1	hf1_eb_18273_82_20032023.ScanId;v=1;d1=8967.8967.2	controllerType=0 controllerNumber=1 scan=8967	27.1339
08565:2	1	S.M[+15.995]PLPPHPG.H		M[+16]	431.218	2	861.429	861.429	0	-0.2	17	Non	431	366.04	80.53	5.51	1125	>sp|P02817|AMELX_BOVIN Amelogenin, X isoform OS=Bos taurus OX=9913 GN=AMELX PE=1 SV=2	1	hf1_eb_18273_82_20032023.ScanId;v=1;d1=9133.9133.2	controllerType=0 controllerNumber=1 scan=9133	27.4702
07624:2	1	S.M[+15.995]PLPPHPG.H		M[+16]	431.218	2	861.428	861.429	0	-0.5	17	Non	431.8	397.02	83.49	6.16	1125	>sp|P02817|AMELX_BOVIN Amelogenin, X isoform OS=Bos taurus OX=9913 GN=AMELX PE=1 SV=2	1	hf1_eb_18273_82_20032023.ScanId;v=1;d1=8385.8385.2	controllerType=0 controllerNumber=1 scan=8385	25.978
08036:2	1	S.M[+15.995]PLPPHPG.H		M[+16]	431.218	2	861.428	861.429	0	-0.3	17	Non	433.86	357.21	82.99	5.47	1125	>sp|P02817|AMELX_BOVIN Amelogenin, X isoform OS=Bos taurus OX=9913 GN=AMELX PE=1 SV=2	1	hf1_eb_18273_82_20032023.ScanId;v=1;d1=8715.8715.2	controllerType=0 controllerNumber=1 scan=8715	26.6553
07417:2	1	S.M[+15.995]PLPPHPG.H		M[+16]	431.218	2	861.429	861.429	0	0	17	Non	437.88	368.32	85.39	5.74	1125	>sp|P02817|AMELX_BOVIN Amelogenin, X isoform OS=Bos taurus OX=9913 GN=AMELX PE=1 SV=2	1	hf1_eb_18273_82_20032023.ScanId;v=1;d1=8218.8218.2	controllerType=0 controllerNumber=1 scan=8218	25.6396
07841:2	1	S.M[+15.995]PLPPHPG.H		M[+16]	431.218	2	861.428	861.429	0	-0.4	17	Non	447.88	358.59	86.72	5.08	1125	>sp|P02817|AMELX_BOVIN Amelogenin, X isoform OS=Bos taurus OX=9913 GN=AMELX PE=1 SV=2	1	hf1_eb_18273_82_20032023.ScanId;v=1;d1=8557.8557.2	controllerType=0 controllerNumber=1 scan=8557	26.3162
07015:2	1	S.M[+15.995]PLPPHPG.H		M[+16]	431.218	2	861.428	861.429	0	-0.8	17	Non	457.09	372.69	82.84	5.77	1125	>sp|P02817|AMELX_BOVIN Amelogenin, X isoform OS=Bos taurus OX=9913 GN=AMELX PE=1 SV=2	1	hf1_eb_18273_82_20032023.ScanId;v=1;d1=7896.7896.2	controllerType=0 controllerNumber=1 scan=7896	24.9658
10571:1	1	S.M[+15.995]PLPP[+31.990]HPG.H		M[+16], P[+32]	893.419	1	893.419	893.419	0	0.4	17	Non	148.45	148.45	27.8	2.14	1125	>sp|P02817|AMELX_BOVIN Amelogenin, X isoform OS=Bos taurus OX=9913 GN=AMELX PE=1 SV=2	1	hf1_eb_18273_82_20032023.ScanId;v=1;d1=10688.10688.3	controllerType=0 controllerNumber=1 scan=10688	30.4684
05399:2	1	S.M[+15.995]PLPP[+15.995]HPG.H		M[+16], P[+16]	439.215	2	877.423	877.424	0	-1.1	17	Non	173.55	108.98	3.06	0.7	1125	>sp|P02817|AMELX_BOVIN Amelogenin, X isoform OS=Bos taurus OX=9913 GN=AMELX PE=1 SV=2	1	hf1_eb_18273_82_20032023.ScanId;v=1;d1=6560.6560.2	controllerType=0 controllerNumber=1 scan=6560	22.1638
07035:2	1	S.M[+15.995]PLPP[+15.995]HPG.H		M[+16], P[+16]	439.215	2	877.422	877.424	0	-2	17	Non	184.63	115.77	10.56	0.58	1125	>sp|P02817|AMELX_BOVIN Amelogenin, X isoform OS=Bos taurus OX=9913 GN=AMELX PE=1 SV=2	1	hf1_eb_18273_82_20032023.ScanId;v=1;d1=7912.7912.2	controllerType=0 controllerNumber=1 scan=7912	25.0009
05022:2	1	S.M[+15.995]PLP[+15.995]PHPG.H		M[+16], P[+16]	439.215	2	877.423	877.424	0	-1.1	17	Non	205.29	135.46	0	0.89	1125	>sp|P02817|AMELX_BOVIN Amelogenin, X isoform OS=Bos taurus OX=9913 GN=AMELX PE=1 SV=2	1	hf1_eb_18273_82_20032023.ScanId;v=1;d1=6237.6237.2	controllerType=0 controllerNumber=1 scan=6237	21.4761
05192:2	1	S.M[+15.995]PLP[+15.995]PHPG.H		M[+16], P[+16]	439.215	2	877.423	877.424	0	-0.6	17	Non	216.71	107.24	0	0.7	1125	>sp|P02817|AMELX_BOVIN Amelogenin, X isoform OS=Bos taurus OX=9913 GN=AMELX PE=1 SV=2	1	hf1_eb_18273_82_20032023.ScanId;v=1;d1=6387.6387.2	controllerType=0 controllerNumber=1 scan=6387	21.815
05937:2	1	S.M[+15.995]PLP[+31.990]PHPG.H		M[+16], P[+32]	447.212	2	893.417	893.419	0	-2	17	Non	240.17	203.42	11.42	2.4	1125	>sp|P02817|AMELX_BOVIN Amelogenin, X isoform OS=Bos taurus OX=9913 GN=AMELX PE=1 SV=2	1	hf1_eb_18273_82_20032023.ScanId;v=1;d1=7022.7022.2	controllerType=0 controllerNumber=1 scan=7022	23.1673
06572:2	1	S.M[+15.995]PLPP[+15.995]HPG.H		M[+16], P[+16]	439.215	2	877.422	877.424	0	-1.7	17	Non	264.2	229.15	9.68	3.75	1125	>sp|P02817|AMELX_BOVIN Amelogenin, X isoform OS=Bos taurus OX=9913 GN=AMELX PE=1 SV=2	1	hf1_eb_18273_82_20032023.ScanId;v=1;d1=7539.7539.2	controllerType=0 controllerNumber=1 scan=7539	24.2025
06107:2	1	S.M[+15.995]PLPPH[+15.995]PG.H		H[+16], M[+16]	439.215	2	877.423	877.424	0	-1	17	Non	264.56	126.99	4.85	2.51	1125	>sp|P02817|AMELX_BOVIN Amelogenin, X isoform OS=Bos taurus OX=9913 GN=AMELX PE=1 SV=2	1	hf1_eb_18273_82_20032023.ScanId;v=1;d1=7160.7160.2	controllerType=0 controllerNumber=1 scan=7160	23.4318
06772:2	1	S.M[+15.995]PLPPH[+15.995]PG.H		H[+16], M[+16]	439.214	2	877.421	877.424	0	-2.7	17	Non	308.22	183.32	5.11	3.31	1125	>sp|P02817|AMELX_BOVIN Amelogenin, X isoform OS=Bos taurus OX=9913 GN=AMELX PE=1 SV=2	1	hf1_eb_18273_82_20032023.ScanId;v=1;d1=7699.7699.2	controllerType=0 controllerNumber=1 scan=7699	24.54
08774:2	1	S.MPLPPHPGH.P			491.749	2	982.492	982.493	0	-1.2	17	Non	497.19	471.65	471.65	6.68	1125	>sp|P02817|AMELX_BOVIN Amelogenin, X isoform OS=Bos taurus OX=9913 GN=AMELX PE=1 SV=2	1	hf1_eb_18273_82_20032023.ScanId;v=1;d1=9302.9302.2	controllerType=0 controllerNumber=1 scan=9302	27.8008
09006:2	1	S.MPLPPHPGH.P			491.75	2	982.492	982.493	0	-0.8	17	Non	536.91	508.56	508.56	6.77	1125	>sp|P02817|AMELX_BOVIN Amelogenin, X isoform OS=Bos taurus OX=9913 GN=AMELX PE=1 SV=2	1	hf1_eb_18273_82_20032023.ScanId;v=1;d1=9487.9487.2	controllerType=0 controllerNumber=1 scan=9487	28.1789
06045:2	1	S.M[+31.990]PLPPHPGH.P		M[+32]	507.745	2	1014.48	1014.48	0	0.6	17	Non	80.07	80.07	0	0.35	1125	>sp|P02817|AMELX_BOVIN Amelogenin, X isoform OS=Bos taurus OX=9913 GN=AMELX PE=1 SV=2	1	hf1_eb_18273_82_20032023.ScanId;v=1;d1=7110.7110.2	controllerType=0 controllerNumber=1 scan=7110	23.3401
06056:2	1	S.M[+31.990]PLPPHPGH.P		M[+32]	507.745	2	1014.48	1014.48	0	0.5	17	Non	85.65	85.65	0	0.63	1125	>sp|P02817|AMELX_BOVIN Amelogenin, X isoform OS=Bos taurus OX=9913 GN=AMELX PE=1 SV=2	1	hf1_eb_18273_82_20032023.ScanId;v=1;d1=7118.7118.2	controllerType=0 controllerNumber=1 scan=7118	23.3563
06639:2	1	S.M[+15.995]PLPPHPGH.P		M[+16]	499.747	2	998.486	998.488	0	-1.2	17	Non	86.94	86.94	37.95	0.63	1125	>sp|P02817|AMELX_BOVIN Amelogenin, X isoform OS=Bos taurus OX=9913 GN=AMELX PE=1 SV=2	1	hf1_eb_18273_82_20032023.ScanId;v=1;d1=7593.7593.2	controllerType=0 controllerNumber=1 scan=7593	24.3031
05466:2	1	S.M[+31.990]PLPPHPGH.P		M[+32]	507.745	2	1014.48	1014.48	0	-0.4	17	Non	133.45	133.45	0	1.25	1125	>sp|P02817|AMELX_BOVIN Amelogenin, X isoform OS=Bos taurus OX=9913 GN=AMELX PE=1 SV=2	1	hf1_eb_18273_82_20032023.ScanId;v=1;d1=6616.6616.2	controllerType=0 controllerNumber=1 scan=6616	22.281
06117:2	1	S.M[+15.995]PLPPHPGH.P		M[+16]	499.747	2	998.487	998.488	0	-0.8	17	Non	178.68	178.68	12.67	2.11	1125	>sp|P02817|AMELX_BOVIN Amelogenin, X isoform OS=Bos taurus OX=9913 GN=AMELX PE=1 SV=2	1	hf1_eb_18273_82_20032023.ScanId;v=1;d1=7168.7168.2	controllerType=0 controllerNumber=1 scan=7168	23.4465
06328:2	1	S.M[+31.990]PLPPHPGH.P		M[+32]	507.745	2	1014.48	1014.48	0	1.1	17	Non	205.83	205.61	29.36	2.2	1125	>sp|P02817|AMELX_BOVIN Amelogenin, X isoform OS=Bos taurus OX=9913 GN=AMELX PE=1 SV=2	1	hf1_eb_18273_82_20032023.ScanId;v=1;d1=7337.7337.2	controllerType=0 controllerNumber=1 scan=7337	23.7848
05900:2	1	S.M[+15.995]PLPPHPGH.P		M[+16]	499.748	2	998.489	998.488	0	1	17	Non	237.08	237.08	31.15	2.64	1125	>sp|P02817|AMELX_BOVIN Amelogenin, X isoform OS=Bos taurus OX=9913 GN=AMELX PE=1 SV=2	1	hf1_eb_18273_82_20032023.ScanId;v=1;d1=6991.6991.2	controllerType=0 controllerNumber=1 scan=6991	23.1037
04055:2	1	S.M[+15.995]PLPPHPGH.P		M[+16]	499.747	2	998.487	998.488	0	-0.7	17	Non	370.23	338.76	66	5.32	1125	>sp|P02817|AMELX_BOVIN Amelogenin, X isoform OS=Bos taurus OX=9913 GN=AMELX PE=1 SV=2	1	hf1_eb_18273_82_20032023.ScanId;v=1;d1=5426.5426.2	controllerType=0 controllerNumber=1 scan=5426	19.7511
05487:2	1	S.M[+15.995]PLPPHPGH.P		M[+16]	499.747	2	998.487	998.488	0	-1.1	17	Non	475.5	432.47	84.06	6.25	1125	>sp|P02817|AMELX_BOVIN Amelogenin, X isoform OS=Bos taurus OX=9913 GN=AMELX PE=1 SV=2	1	hf1_eb_18273_82_20032023.ScanId;v=1;d1=6634.6634.2	controllerType=0 controllerNumber=1 scan=6634	22.3221
05674:2	1	S.M[+15.995]PLPPHPGH.P		M[+16]	499.746	2	998.485	998.488	0	-2.4	17	Non	484	379.66	103.5	5.81	1125	>sp|P02817|AMELX_BOVIN Amelogenin, X isoform OS=Bos taurus OX=9913 GN=AMELX PE=1 SV=2	1	hf1_eb_18273_82_20032023.ScanId;v=1;d1=6796.6796.2	controllerType=0 controllerNumber=1 scan=6796	22.662
05181:2	1	S.M[+15.995]PLPPHPGH.P		M[+16]	499.747	2	998.486	998.488	0	-1.6	17	Non	484.7	424.94	87.16	6.27	1125	>sp|P02817|AMELX_BOVIN Amelogenin, X isoform OS=Bos taurus OX=9913 GN=AMELX PE=1 SV=2	1	hf1_eb_18273_82_20032023.ScanId;v=1;d1=6378.6378.2	controllerType=0 controllerNumber=1 scan=6378	21.7992
04210:2	1	S.M[+15.995]PLPPHPGH.P		M[+16]	499.747	2	998.486	998.488	0	-1.3	17	Non	497.3	407.5	98.84	6.68	1125	>sp|P02817|AMELX_BOVIN Amelogenin, X isoform OS=Bos taurus OX=9913 GN=AMELX PE=1 SV=2	1	hf1_eb_18273_82_20032023.ScanId;v=1;d1=5572.5572.2	controllerType=0 controllerNumber=1 scan=5572	20.0984
04795:2	1	S.M[+15.995]PLPPHPGH.P		M[+16]	499.747	2	998.487	998.488	0	-0.8	17	Non	538.03	468.46	100.34	6.77	1125	>sp|P02817|AMELX_BOVIN Amelogenin, X isoform OS=Bos taurus OX=9913 GN=AMELX PE=1 SV=2	1	hf1_eb_18273_82_20032023.ScanId;v=1;d1=6057.6057.2	controllerType=0 controllerNumber=1 scan=6057	21.1235
05011:2	1	S.M[+15.995]PLPPHPGH.P		M[+16]	499.747	2	998.487	998.488	0	-0.8	17	Non	541.08	470.96	109.23	6.77	1125	>sp|P02817|AMELX_BOVIN Amelogenin, X isoform OS=Bos taurus OX=9913 GN=AMELX PE=1 SV=2	1	hf1_eb_18273_82_20032023.ScanId;v=1;d1=6229.6229.2	controllerType=0 controllerNumber=1 scan=6229	21.4627
04588:2	1	S.M[+15.995]PLPPHPGH.P		M[+16]	499.747	2	998.487	998.488	0	-1.1	17	Non	574.61	466.62	104.99	7.22	1125	>sp|P02817|AMELX_BOVIN Amelogenin, X isoform OS=Bos taurus OX=9913 GN=AMELX PE=1 SV=2	1	hf1_eb_18273_82_20032023.ScanId;v=1;d1=5893.5893.2	controllerType=0 controllerNumber=1 scan=5893	20.7877
04388:2	1	S.M[+15.995]PLPPHPGH.P		M[+16]	499.747	2	998.487	998.488	0	-0.9	17	Non	591.93	448.36	120.95	7.22	1125	>sp|P02817|AMELX_BOVIN Amelogenin, X isoform OS=Bos taurus OX=9913 GN=AMELX PE=1 SV=2	1	hf1_eb_18273_82_20032023.ScanId;v=1;d1=5729.5729.2	controllerType=0 controllerNumber=1 scan=5729	20.4471
03350:2	1	S.M[+15.995]P[+31.990]LPPHPGH.P		M[+16], P[+32]	515.742	2	1030.48	1030.48	0	-0.8	17	Non	55.06	55.06	9.11	0.35	1125	>sp|P02817|AMELX_BOVIN Amelogenin, X isoform OS=Bos taurus OX=9913 GN=AMELX PE=1 SV=2	1	hf1_eb_18273_82_20032023.ScanId;v=1;d1=4855.4855.2	controllerType=0 controllerNumber=1 scan=4855	18.568
07459:2	1	S.M[+15.995]PLPPHP[+31.990]GH.P		M[+16], P[+32]	515.742	2	1030.48	1030.48	0	-0.7	17	Non	257.39	252.97	8.4	3.93	1125	>sp|P02817|AMELX_BOVIN Amelogenin, X isoform OS=Bos taurus OX=9913 GN=AMELX PE=1 SV=2	1	hf1_eb_18273_82_20032023.ScanId;v=1;d1=8252.8252.2	controllerType=0 controllerNumber=1 scan=8252	25.7035
07263:2	1	S.M[+15.995]PLPPHP[+31.990]GH.P		M[+16], P[+32]	515.742	2	1030.48	1030.48	0	-1.3	17	Non	351.59	290.46	67.63	4.64	1125	>sp|P02817|AMELX_BOVIN Amelogenin, X isoform OS=Bos taurus OX=9913 GN=AMELX PE=1 SV=2	1	hf1_eb_18273_82_20032023.ScanId;v=1;d1=8095.8095.2	controllerType=0 controllerNumber=1 scan=8095	25.3569
10000:2	1	S.MPLPPHPGHP.G			540.275	2	1079.54	1079.55	0	-1.7	17	Non	295.24	289.03	289.03	5.47	1125	>sp|P02817|AMELX_BOVIN Amelogenin, X isoform OS=Bos taurus OX=9913 GN=AMELX PE=1 SV=2	1	hf1_eb_18273_82_20032023.ScanId;v=1;d1=10255.10255.2	controllerType=0 controllerNumber=1 scan=10255	29.6544
09770:2	1	S.MPLPPHPGHP.G			540.276	2	1079.54	1079.55	0	-0.9	17	Non	456.7	328.82	328.82	5.8	1125	>sp|P02817|AMELX_BOVIN Amelogenin, X isoform OS=Bos taurus OX=9913 GN=AMELX PE=1 SV=2	1	hf1_eb_18273_82_20032023.ScanId;v=1;d1=10075.10075.2	controllerType=0 controllerNumber=1 scan=10075	29.3068
10710:2	1	S.MPLPPHPGHP.G			540.277	2	1079.55	1079.55	0	0.5	17	Non	492.54	324.48	324.48	5.8	1125	>sp|P02817|AMELX_BOVIN Amelogenin, X isoform OS=Bos taurus OX=9913 GN=AMELX PE=1 SV=2	1	hf1_eb_18273_82_20032023.ScanId;v=1;d1=10793.10793.2	controllerType=0 controllerNumber=1 scan=10793	30.6665
10354:2	1	S.MPLPPHPGHP.G			540.277	2	1079.55	1079.55	0	0.3	17	Non	661.34	390.35	390.35	9.45	1125	>sp|P02817|AMELX_BOVIN Amelogenin, X isoform OS=Bos taurus OX=9913 GN=AMELX PE=1 SV=2	1	hf1_eb_18273_82_20032023.ScanId;v=1;d1=10522.10522.2	controllerType=0 controllerNumber=1 scan=10522	30.1604
06857:2	1	S.M[+15.995]PLPPHPGHP.G		M[+16]	548.274	2	1095.54	1095.54	0	-0.2	17	Non	165.07	165.07	14.46	2.64	1125	>sp|P02817|AMELX_BOVIN Amelogenin, X isoform OS=Bos taurus OX=9913 GN=AMELX PE=1 SV=2	1	hf1_eb_18273_82_20032023.ScanId;v=1;d1=7769.7769.2	controllerType=0 controllerNumber=1 scan=7769	24.6935
07375:2	1	S.M[+31.990]PLPPHPGHP.G		M[+32]	556.271	2	1111.54	1111.54	0	0.4	17	Non	271.8	176.38	0	4.2	1125	>sp|P02817|AMELX_BOVIN Amelogenin, X isoform OS=Bos taurus OX=9913 GN=AMELX PE=1 SV=2	1	hf1_eb_18273_82_20032023.ScanId;v=1;d1=8182.8182.2	controllerType=0 controllerNumber=1 scan=8182	25.55
09042:2	1	S.MPLPPHPGHP[+15.995].G		P[+16]	548.273	2	1095.54	1095.54	0	-2.3	17	Non	307.87	147.88	35.81	3.38	1125	>sp|P02817|AMELX_BOVIN Amelogenin, X isoform OS=Bos taurus OX=9913 GN=AMELX PE=1 SV=2	1	hf1_eb_18273_82_20032023.ScanId;v=1;d1=9516.9516.2	controllerType=0 controllerNumber=1 scan=9516	28.2395
06819:2	1	S.M[+15.995]PLPPHPGHP.G		M[+16]	548.273	2	1095.54	1095.54	0	-0.9	17	Non	542.75	351.85	66.38	6.32	1125	>sp|P02817|AMELX_BOVIN Amelogenin, X isoform OS=Bos taurus OX=9913 GN=AMELX PE=1 SV=2	1	hf1_eb_18273_82_20032023.ScanId;v=1;d1=7738.7738.2	controllerType=0 controllerNumber=1 scan=7738	24.6277
06626:2	1	S.M[+15.995]PLPPHPGHP.G		M[+16]	548.273	2	1095.54	1095.54	0	-1.3	17	Non	568.43	380.48	65.73	7.47	1125	>sp|P02817|AMELX_BOVIN Amelogenin, X isoform OS=Bos taurus OX=9913 GN=AMELX PE=1 SV=2	1	hf1_eb_18273_82_20032023.ScanId;v=1;d1=7584.7584.2	controllerType=0 controllerNumber=1 scan=7584	24.2864
05795:2	1	S.M[+15.995]PLPPHPGHP.G		M[+16]	548.273	2	1095.54	1095.54	0	-1.7	17	Non	600.37	357.22	62.32	7.36	1125	>sp|P02817|AMELX_BOVIN Amelogenin, X isoform OS=Bos taurus OX=9913 GN=AMELX PE=1 SV=2	1	hf1_eb_18273_82_20032023.ScanId;v=1;d1=6902.6902.2	controllerType=0 controllerNumber=1 scan=6902	22.907
05995:2	1	S.M[+15.995]PLPPHPGHP.G		M[+16]	548.273	2	1095.54	1095.54	0	-1	17	Non	618.45	395.29	82.99	8.47	1125	>sp|P02817|AMELX_BOVIN Amelogenin, X isoform OS=Bos taurus OX=9913 GN=AMELX PE=1 SV=2	1	hf1_eb_18273_82_20032023.ScanId;v=1;d1=7069.7069.2	controllerType=0 controllerNumber=1 scan=7069	23.2568
06200:2	1	S.M[+15.995]PLPPHPGHP.G		M[+16]	548.274	2	1095.54	1095.54	0	-0.2	17	Non	668.11	422.96	82.12	9.47	1125	>sp|P02817|AMELX_BOVIN Amelogenin, X isoform OS=Bos taurus OX=9913 GN=AMELX PE=1 SV=2	1	hf1_eb_18273_82_20032023.ScanId;v=1;d1=7240.7240.2	controllerType=0 controllerNumber=1 scan=7240	23.5995
06426:2	1	S.M[+15.995]PLPPHPGHP.G		M[+16]	548.274	2	1095.54	1095.54	0	-0.6	17	Non	668.74	407.19	80.51	9.47	1125	>sp|P02817|AMELX_BOVIN Amelogenin, X isoform OS=Bos taurus OX=9913 GN=AMELX PE=1 SV=2	1	hf1_eb_18273_82_20032023.ScanId;v=1;d1=7417.7417.2	controllerType=0 controllerNumber=1 scan=7417	23.9468
13145:2	1	S.MPLP[+15.995]PHP[+15.995]GHP.G		P[+16]*2	556.271	2	1111.53	1111.54	0	-0.5	17	Non	78.29	16.64	5.41	0.32	1125	>sp|P02817|AMELX_BOVIN Amelogenin, X isoform OS=Bos taurus OX=9913 GN=AMELX PE=1 SV=2	1	hf1_eb_18273_82_20032023.ScanId;v=1;d1=12617.12617.2	controllerType=0 controllerNumber=1 scan=12617	34.075
04607:2	1	S.MP[+15.995]LP[+15.995]PHPGHP.G		P[+16]*2	556.272	2	1111.54	1111.54	0	0.5	17	Non	126.31	121.69	4	1.41	1125	>sp|P02817|AMELX_BOVIN Amelogenin, X isoform OS=Bos taurus OX=9913 GN=AMELX PE=1 SV=2	1	hf1_eb_18273_82_20032023.ScanId;v=1;d1=5907.5907.2	controllerType=0 controllerNumber=1 scan=5907	20.8107
09071:2	1	S.M[+15.995]PLPPHP[+31.990]GHP.G		M[+16], P[+32]	564.268	2	1127.53	1127.53	0	-1.1	17	Non	217.25	156.21	23.78	2.23	1125	>sp|P02817|AMELX_BOVIN Amelogenin, X isoform OS=Bos taurus OX=9913 GN=AMELX PE=1 SV=2	1	hf1_eb_18273_82_20032023.ScanId;v=1;d1=9541.9541.2	controllerType=0 controllerNumber=1 scan=9541	28.2907
05051:2	1	S.M[+15.995]PLPPHPGH[+15.995]P.G		H[+16], M[+16]	556.271	2	1111.53	1111.54	0	-1.2	17	Non	280.7	233.63	0.97	5.18	1125	>sp|P02817|AMELX_BOVIN Amelogenin, X isoform OS=Bos taurus OX=9913 GN=AMELX PE=1 SV=2	1	hf1_eb_18273_82_20032023.ScanId;v=1;d1=6259.6259.2	controllerType=0 controllerNumber=1 scan=6259	21.524
08861:2	1	S.M[+15.995]PLPPHP[+31.990]GHP.G		M[+16], P[+32]	564.268	2	1127.53	1127.53	0	-2	17	Non	297.97	239.59	25.39	3.82	1125	>sp|P02817|AMELX_BOVIN Amelogenin, X isoform OS=Bos taurus OX=9913 GN=AMELX PE=1 SV=2	1	hf1_eb_18273_82_20032023.ScanId;v=1;d1=9373.9373.2	controllerType=0 controllerNumber=1 scan=9373	27.9503
09296:2	1	S.M[+15.995]PLPPHP[+31.990]GHP.G		M[+16], P[+32]	564.268	2	1127.53	1127.53	0	-2.3	17	Non	304.81	250.84	11.6	3.98	1125	>sp|P02817|AMELX_BOVIN Amelogenin, X isoform OS=Bos taurus OX=9913 GN=AMELX PE=1 SV=2	1	hf1_eb_18273_82_20032023.ScanId;v=1;d1=9717.9717.2	controllerType=0 controllerNumber=1 scan=9717	28.6338
08661:3	1	S.MPLPPHPGHPG.Y			379.527	3	1136.57	1136.57	0	-0.8	17	Non	328.75	328.75	328.75	5.06	1125	>sp|P02817|AMELX_BOVIN Amelogenin, X isoform OS=Bos taurus OX=9913 GN=AMELX PE=1 SV=2	1	hf1_eb_18273_82_20032023.ScanId;v=1;d1=9207.9207.3	controllerType=0 controllerNumber=1 scan=9207	27.6159
09082:3	1	S.MPLPPHPGHPG.Y			379.527	3	1136.57	1136.57	0	-0.3	17	Non	480.85	457.63	457.63	6.44	1125	>sp|P02817|AMELX_BOVIN Amelogenin, X isoform OS=Bos taurus OX=9913 GN=AMELX PE=1 SV=2	1	hf1_eb_18273_82_20032023.ScanId;v=1;d1=9550.9550.3	controllerType=0 controllerNumber=1 scan=9550	28.3062
08872:3	1	S.MPLPPHPGHPG.Y			379.527	3	1136.57	1136.57	0	0	17	Non	485.67	485.67	485.67	6.44	1125	>sp|P02817|AMELX_BOVIN Amelogenin, X isoform OS=Bos taurus OX=9913 GN=AMELX PE=1 SV=2	1	hf1_eb_18273_82_20032023.ScanId;v=1;d1=9382.9382.3	controllerType=0 controllerNumber=1 scan=9382	27.9655
09305:3	1	S.MPLPPHPGHPG.Y			379.527	3	1136.57	1136.57	0	-0.9	17	Non	494.48	476.62	476.62	6.44	1125	>sp|P02817|AMELX_BOVIN Amelogenin, X isoform OS=Bos taurus OX=9913 GN=AMELX PE=1 SV=2	1	hf1_eb_18273_82_20032023.ScanId;v=1;d1=9724.9724.3	controllerType=0 controllerNumber=1 scan=9724	28.6448
37471:3	1	S.MP[+15.995]LPPHPGHPG.Y		P[+16]	384.858	3	1152.56	1152.56	0	-0.9	17	Non	35.35	35.35	4	0.94	1125	>sp|P02817|AMELX_BOVIN Amelogenin, X isoform OS=Bos taurus OX=9913 GN=AMELX PE=1 SV=2	1	hf1_eb_18273_82_20032023.ScanId;v=1;d1=31454.31454.3	controllerType=0 controllerNumber=1 scan=31454	74.3475
37305:3	1	S.MP[+15.995]LPPHPGHPG.Y		P[+16]	384.859	3	1152.56	1152.56	0	0.9	17	Non	75.12	75.12	4	0.64	1125	>sp|P02817|AMELX_BOVIN Amelogenin, X isoform OS=Bos taurus OX=9913 GN=AMELX PE=1 SV=2	1	hf1_eb_18273_82_20032023.ScanId;v=1;d1=31225.31225.3	controllerType=0 controllerNumber=1 scan=31225	73.3266
06830:2	1	S.MP[+15.995]LPPHPGHPG.Y		P[+16]	576.784	2	1152.56	1152.56	0	-1.7	17	Non	128.08	128.08	4	1.42	1125	>sp|P02817|AMELX_BOVIN Amelogenin, X isoform OS=Bos taurus OX=9913 GN=AMELX PE=1 SV=2	1	hf1_eb_18273_82_20032023.ScanId;v=1;d1=7748.7748.2	controllerType=0 controllerNumber=1 scan=7748	24.6504
37373:3	1	S.MP[+15.995]LPPHPGHPG.Y		P[+16]	384.859	3	1152.56	1152.56	0	0.3	17	Non	137.13	137.13	4	2.22	1125	>sp|P02817|AMELX_BOVIN Amelogenin, X isoform OS=Bos taurus OX=9913 GN=AMELX PE=1 SV=2	1	hf1_eb_18273_82_20032023.ScanId;v=1;d1=31308.31308.3	controllerType=0 controllerNumber=1 scan=31308	73.6665
07868:3	1	S.MPLPPHP[+15.995]GHPG.Y		P[+16]	384.858	3	1152.56	1152.56	0	-1.1	17	Non	193.26	193.26	3.63	2.31	1125	>sp|P02817|AMELX_BOVIN Amelogenin, X isoform OS=Bos taurus OX=9913 GN=AMELX PE=1 SV=2	1	hf1_eb_18273_82_20032023.ScanId;v=1;d1=8577.8577.2	controllerType=0 controllerNumber=1 scan=8577	26.3567
12381:2	1	S.MPLPPHP[+15.995]GHPG.Y		P[+16]	576.785	2	1152.56	1152.56	0	1.4	17	Non	242.13	242.13	7.02	4.16	1125	>sp|P02817|AMELX_BOVIN Amelogenin, X isoform OS=Bos taurus OX=9913 GN=AMELX PE=1 SV=2	1	hf1_eb_18273_82_20032023.ScanId;v=1;d1=12060.12060.2	controllerType=0 controllerNumber=1 scan=12060	33.0556
07605:3	1	S.MPLPPH[+15.995]PGHPG.Y		H[+16]	384.858	3	1152.56	1152.56	0	-1.6	17	Non	251.89	251.89	5.02	4.15	1125	>sp|P02817|AMELX_BOVIN Amelogenin, X isoform OS=Bos taurus OX=9913 GN=AMELX PE=1 SV=2	1	hf1_eb_18273_82_20032023.ScanId;v=1;d1=8367.8367.3	controllerType=0 controllerNumber=1 scan=8367	25.9379
06530:3	1	S.MP[+15.995]LPPHPGHPG.Y		P[+16]	384.858	3	1152.56	1152.56	0	-1	17	Non	258.35	258.35	4	4.71	1125	>sp|P02817|AMELX_BOVIN Amelogenin, X isoform OS=Bos taurus OX=9913 GN=AMELX PE=1 SV=2	1	hf1_eb_18273_82_20032023.ScanId;v=1;d1=7502.7502.2	controllerType=0 controllerNumber=1 scan=7502	24.1226
13186:2	1	S.MPLPP[+15.995]HPGHPG.Y		P[+16]	576.783	2	1152.56	1152.56	0	-2.1	17	Non	258.87	258.87	0	3.82	1125	>sp|P02817|AMELX_BOVIN Amelogenin, X isoform OS=Bos taurus OX=9913 GN=AMELX PE=1 SV=2	1	hf1_eb_18273_82_20032023.ScanId;v=1;d1=12653.12653.2	controllerType=0 controllerNumber=1 scan=12653	34.1468
05511:2	1	S.M[+15.995]PLPPHPGHPG.Y		M[+16]	576.784	2	1152.56	1152.56	0	-1.2	17	Non	292.2	285.65	33.18	5.35	1125	>sp|P02817|AMELX_BOVIN Amelogenin, X isoform OS=Bos taurus OX=9913 GN=AMELX PE=1 SV=2	1	hf1_eb_18273_82_20032023.ScanId;v=1;d1=6652.6652.3	controllerType=0 controllerNumber=1 scan=6652	22.3623
08273:3	1	S.MPLPPHPGH[+15.995]PG.Y		H[+16]	384.858	3	1152.56	1152.56	0	-0.8	17	Non	299.47	246.47	0.63	4.31	1125	>sp|P02817|AMELX_BOVIN Amelogenin, X isoform OS=Bos taurus OX=9913 GN=AMELX PE=1 SV=2	1	hf1_eb_18273_82_20032023.ScanId;v=1;d1=8897.8897.3	controllerType=0 controllerNumber=1 scan=8897	27.0073
07382:3	1	S.M[+15.995]PLPPHPGHPG.Y		M[+16]	384.858	3	1152.56	1152.56	0	-2.6	17	Non	324.19	296.08	19.72	4.6	1125	>sp|P02817|AMELX_BOVIN Amelogenin, X isoform OS=Bos taurus OX=9913 GN=AMELX PE=1 SV=2	1	hf1_eb_18273_82_20032023.ScanId;v=1;d1=8189.8189.3	controllerType=0 controllerNumber=1 scan=8189	25.5678
06849:3	1	S.M[+15.995]PLPPHPGHPG.Y		M[+16]	384.858	3	1152.56	1152.56	0	-2.3	17	Non	330.88	281.57	22.52	4.48	1125	>sp|P02817|AMELX_BOVIN Amelogenin, X isoform OS=Bos taurus OX=9913 GN=AMELX PE=1 SV=2	1	hf1_eb_18273_82_20032023.ScanId;v=1;d1=7762.7762.3	controllerType=0 controllerNumber=1 scan=7762	24.6805
04829:3	1	S.M[+15.995]PLPPHPGHPG.Y		M[+16]	384.858	3	1152.56	1152.56	0	-0.9	17	Non	357.27	357.27	26.44	5.17	1125	>sp|P02817|AMELX_BOVIN Amelogenin, X isoform OS=Bos taurus OX=9913 GN=AMELX PE=1 SV=2	1	hf1_eb_18273_82_20032023.ScanId;v=1;d1=6082.6082.3	controllerType=0 controllerNumber=1 scan=6082	21.1757
06419:3	1	S.M[+15.995]PLPPHPGHPG.Y		M[+16]	384.858	3	1152.56	1152.56	0	-0.9	17	Non	364.39	364.39	13.41	6	1125	>sp|P02817|AMELX_BOVIN Amelogenin, X isoform OS=Bos taurus OX=9913 GN=AMELX PE=1 SV=2	1	hf1_eb_18273_82_20032023.ScanId;v=1;d1=7410.7410.3	controllerType=0 controllerNumber=1 scan=7410	23.9335
06659:3	1	S.M[+15.995]PLPPHPGHPG.Y		M[+16]	384.858	3	1152.56	1152.56	0	-2.1	17	Non	366.9	366.9	10.93	5.42	1125	>sp|P02817|AMELX_BOVIN Amelogenin, X isoform OS=Bos taurus OX=9913 GN=AMELX PE=1 SV=2	1	hf1_eb_18273_82_20032023.ScanId;v=1;d1=7608.7608.3	controllerType=0 controllerNumber=1 scan=7608	24.3311
07066:3	1	S.M[+15.995]PLPPHPGHPG.Y		M[+16]	384.858	3	1152.56	1152.56	0	-1.9	17	Non	370.59	338.57	24.31	4.85	1125	>sp|P02817|AMELX_BOVIN Amelogenin, X isoform OS=Bos taurus OX=9913 GN=AMELX PE=1 SV=2	1	hf1_eb_18273_82_20032023.ScanId;v=1;d1=7937.7937.3	controllerType=0 controllerNumber=1 scan=7937	25.0455
07825:3	1	S.MPLPPHPGHP[+15.995]G.Y		P[+16]	384.858	3	1152.56	1152.56	0	-0.9	17	Non	372.99	330.61	2.83	5.08	1125	>sp|P02817|AMELX_BOVIN Amelogenin, X isoform OS=Bos taurus OX=9913 GN=AMELX PE=1 SV=2	1	hf1_eb_18273_82_20032023.ScanId;v=1;d1=8543.8543.3	controllerType=0 controllerNumber=1 scan=8543	26.2874
06153:3	1	S.M[+31.990]PLPPHPGHPG.Y		M[+32]	390.19	3	1168.56	1168.56	0	-1	17	Non	387.36	387.36	11.82	5.89	1125	>sp|P02817|AMELX_BOVIN Amelogenin, X isoform OS=Bos taurus OX=9913 GN=AMELX PE=1 SV=2	1	hf1_eb_18273_82_20032023.ScanId;v=1;d1=7203.7203.3	controllerType=0 controllerNumber=1 scan=7203	23.5248
08029:3	1	S.MPLPPHPGHP[+15.995]G.Y		P[+16]	384.858	3	1152.56	1152.56	0	-0.9	17	Non	389.96	323.53	2.93	5.2	1125	>sp|P02817|AMELX_BOVIN Amelogenin, X isoform OS=Bos taurus OX=9913 GN=AMELX PE=1 SV=2	1	hf1_eb_18273_82_20032023.ScanId;v=1;d1=8709.8709.3	controllerType=0 controllerNumber=1 scan=8709	26.6364
06192:3	1	S.M[+15.995]PLPPHPGHPG.Y		M[+16]	384.859	3	1152.56	1152.56	0	-0.7	17	Non	399.36	399.36	14.28	6.42	1125	>sp|P02817|AMELX_BOVIN Amelogenin, X isoform OS=Bos taurus OX=9913 GN=AMELX PE=1 SV=2	1	hf1_eb_18273_82_20032023.ScanId;v=1;d1=7234.7234.3	controllerType=0 controllerNumber=1 scan=7234	23.5884
05226:3	1	S.M[+15.995]PLPPHPGHPG.Y		M[+16]	384.859	3	1152.56	1152.56	0	0.3	17	Non	411.44	411.44	13.28	6.39	1125	>sp|P02817|AMELX_BOVIN Amelogenin, X isoform OS=Bos taurus OX=9913 GN=AMELX PE=1 SV=2	1	hf1_eb_18273_82_20032023.ScanId;v=1;d1=6412.6412.3	controllerType=0 controllerNumber=1 scan=6412	21.8667
05610:3	1	S.M[+15.995]PLPPHPGHPG.Y		M[+16]	384.858	3	1152.56	1152.56	0	-1.4	17	Non	414.09	381.9	29.76	6.4	1125	>sp|P02817|AMELX_BOVIN Amelogenin, X isoform OS=Bos taurus OX=9913 GN=AMELX PE=1 SV=2	1	hf1_eb_18273_82_20032023.ScanId;v=1;d1=6743.6743.3	controllerType=0 controllerNumber=1 scan=6743	22.5541
05978:3	1	S.M[+15.995]PLPPHPGHPG.Y		M[+16]	384.859	3	1152.56	1152.56	0	0	17	Non	419.82	419.82	27.43	6.4	1125	>sp|P02817|AMELX_BOVIN Amelogenin, X isoform OS=Bos taurus OX=9913 GN=AMELX PE=1 SV=2	1	hf1_eb_18273_82_20032023.ScanId;v=1;d1=7058.7058.3	controllerType=0 controllerNumber=1 scan=7058	23.2382
05049:3	1	S.M[+15.995]PLPPHPGHPG.Y		M[+16]	384.859	3	1152.56	1152.56	0	-0.4	17	Non	425.81	425.81	28.28	6.4	1125	>sp|P02817|AMELX_BOVIN Amelogenin, X isoform OS=Bos taurus OX=9913 GN=AMELX PE=1 SV=2	1	hf1_eb_18273_82_20032023.ScanId;v=1;d1=6258.6258.3	controllerType=0 controllerNumber=1 scan=6258	21.52
05429:3	1	S.M[+15.995]PLPPHPGHPG.Y		M[+16]	384.859	3	1152.56	1152.56	0	0	17	Non	427.47	399.66	32.07	6.4	1125	>sp|P02817|AMELX_BOVIN Amelogenin, X isoform OS=Bos taurus OX=9913 GN=AMELX PE=1 SV=2	1	hf1_eb_18273_82_20032023.ScanId;v=1;d1=6583.6583.3	controllerType=0 controllerNumber=1 scan=6583	22.2106
05786:3	1	S.M[+15.995]PLPPHPGHPG.Y		M[+16]	384.858	3	1152.56	1152.56	0	-1.7	17	Non	463.44	431.29	27.8	6.42	1125	>sp|P02817|AMELX_BOVIN Amelogenin, X isoform OS=Bos taurus OX=9913 GN=AMELX PE=1 SV=2	1	hf1_eb_18273_82_20032023.ScanId;v=1;d1=6894.6894.3	controllerType=0 controllerNumber=1 scan=6894	22.8914
05793:2	1	S.M[+15.995]PLPPHPGHPG.Y		M[+16]	576.784	2	1152.56	1152.56	0	-1.7	17	Non	569.4	516.44	48.15	7.47	1125	>sp|P02817|AMELX_BOVIN Amelogenin, X isoform OS=Bos taurus OX=9913 GN=AMELX PE=1 SV=2	1	hf1_eb_18273_82_20032023.ScanId;v=1;d1=6900.6900.2	controllerType=0 controllerNumber=1 scan=6900	22.9031
05997:2	1	S.M[+15.995]PLPPHPGHPG.Y		M[+16]	576.784	2	1152.56	1152.56	0	-1	17	Non	593.37	549.27	55.49	7.47	1125	>sp|P02817|AMELX_BOVIN Amelogenin, X isoform OS=Bos taurus OX=9913 GN=AMELX PE=1 SV=2	1	hf1_eb_18273_82_20032023.ScanId;v=1;d1=7070.7070.2	controllerType=0 controllerNumber=1 scan=7070	23.2578
05227:2	1	S.M[+15.995]PLPPHPGHPG.Y		M[+16]	576.784	2	1152.56	1152.56	0	-0.8	17	Non	604.11	554.06	62.24	8.47	1125	>sp|P02817|AMELX_BOVIN Amelogenin, X isoform OS=Bos taurus OX=9913 GN=AMELX PE=1 SV=2	1	hf1_eb_18273_82_20032023.ScanId;v=1;d1=6413.6413.2	controllerType=0 controllerNumber=1 scan=6413	21.8674
05430:2	1	S.M[+15.995]PLPPHPGHPG.Y		M[+16]	576.784	2	1152.56	1152.56	0	-0.9	17	Non	618.99	553.48	67.63	8.47	1125	>sp|P02817|AMELX_BOVIN Amelogenin, X isoform OS=Bos taurus OX=9913 GN=AMELX PE=1 SV=2	1	hf1_eb_18273_82_20032023.ScanId;v=1;d1=6584.6584.2	controllerType=0 controllerNumber=1 scan=6584	22.2113
05611:2	1	S.M[+15.995]PLPPHPGHPG.Y		M[+16]	576.784	2	1152.56	1152.56	0	-1.9	17	Non	620.55	536.17	114.52	8.12	1125	>sp|P02817|AMELX_BOVIN Amelogenin, X isoform OS=Bos taurus OX=9913 GN=AMELX PE=1 SV=2	1	hf1_eb_18273_82_20032023.ScanId;v=1;d1=6744.6744.2	controllerType=0 controllerNumber=1 scan=6744	22.5548
05054:2	1	S.M[+15.995]PLPPHPGHPG.Y		M[+16]	576.784	2	1152.56	1152.56	0	-0.7	17	Non	624.33	591.13	115.96	8.47	1125	>sp|P02817|AMELX_BOVIN Amelogenin, X isoform OS=Bos taurus OX=9913 GN=AMELX PE=1 SV=2	1	hf1_eb_18273_82_20032023.ScanId;v=1;d1=6262.6262.2	controllerType=0 controllerNumber=1 scan=6262	21.5312
09911:2	1	S.M[+31.990]PLP[+31.990]PHPGHPG.Y		M[+32], P[+32]	600.775	2	1200.54	1200.55	0	-3	17	Non	79.32	79.32	0	0.33	1125	>sp|P02817|AMELX_BOVIN Amelogenin, X isoform OS=Bos taurus OX=9913 GN=AMELX PE=1 SV=2	1	hf1_eb_18273_82_20032023.ScanId;v=1;d1=10183.10183.2	controllerType=0 controllerNumber=1 scan=10183	29.5069
03904:2	1	S.M[+15.995]PLPPHPGHP[+15.995]G.Y		M[+16], P[+16]	584.782	2	1168.56	1168.56	0	0.2	17	Non	96.66	96.66	2.94	1.28	1125	>sp|P02817|AMELX_BOVIN Amelogenin, X isoform OS=Bos taurus OX=9913 GN=AMELX PE=1 SV=2	1	hf1_eb_18273_82_20032023.ScanId;v=1;d1=5301.5301.2	controllerType=0 controllerNumber=1 scan=5301	19.4649
09012:2	1	S.M[+15.995]PLPPH[+15.995]PGHPG.Y		H[+16], M[+16]	584.78	2	1168.55	1168.56	0	-3.4	17	Non	141.09	141.09	10.73	0.65	1125	>sp|P02817|AMELX_BOVIN Amelogenin, X isoform OS=Bos taurus OX=9913 GN=AMELX PE=1 SV=2	1	hf1_eb_18273_82_20032023.ScanId;v=1;d1=9492.9492.2	controllerType=0 controllerNumber=1 scan=9492	28.1885
04047:3	1	S.MP[+15.995]LPPHPGHP[+15.995]G.Y		P[+16]*2	390.191	3	1168.56	1168.56	0	1.1	17	Non	186.47	186.47	2.89	2.31	1125	>sp|P02817|AMELX_BOVIN Amelogenin, X isoform OS=Bos taurus OX=9913 GN=AMELX PE=1 SV=2	1	hf1_eb_18273_82_20032023.ScanId;v=1;d1=5419.5419.2	controllerType=0 controllerNumber=1 scan=5419	19.7338
07621:2	1	S.M[+15.995]PLPPHP[+31.990]GHPG.Y		M[+16], P[+32]	592.778	2	1184.55	1184.55	0	-2.1	17	Non	201.84	201.84	11.38	2.57	1125	>sp|P02817|AMELX_BOVIN Amelogenin, X isoform OS=Bos taurus OX=9913 GN=AMELX PE=1 SV=2	1	hf1_eb_18273_82_20032023.ScanId;v=1;d1=8382.8382.2	controllerType=0 controllerNumber=1 scan=8382	25.9708
04032:2	1	S.M[+15.995]PLPPHPGHP[+15.995]G.Y		M[+16], P[+16]	584.782	2	1168.56	1168.56	0	0	17	Non	241.95	229.79	35.59	4.47	1125	>sp|P02817|AMELX_BOVIN Amelogenin, X isoform OS=Bos taurus OX=9913 GN=AMELX PE=1 SV=2	1	hf1_eb_18273_82_20032023.ScanId;v=1;d1=5407.5407.2	controllerType=0 controllerNumber=1 scan=5407	19.704
04581:3	1	S.M[+15.995]PLPPHPGHP[+15.995]G.Y		M[+16], P[+16]	390.19	3	1168.56	1168.56	0	-1.2	17	Non	255.12	255.12	3.62	4.15	1125	>sp|P02817|AMELX_BOVIN Amelogenin, X isoform OS=Bos taurus OX=9913 GN=AMELX PE=1 SV=2	1	hf1_eb_18273_82_20032023.ScanId;v=1;d1=5885.5885.2	controllerType=0 controllerNumber=1 scan=5885	20.7709
08796:2	1	S.M[+15.995]PLPPH[+15.995]PGHPG.Y		H[+16], M[+16]	584.781	2	1168.56	1168.56	0	-1.1	17	Non	255.13	255.13	10.8	4.17	1125	>sp|P02817|AMELX_BOVIN Amelogenin, X isoform OS=Bos taurus OX=9913 GN=AMELX PE=1 SV=2	1	hf1_eb_18273_82_20032023.ScanId;v=1;d1=9322.9322.2	controllerType=0 controllerNumber=1 scan=9322	27.8481
04817:3	1	S.M[+15.995]PLPPHP[+15.995]GHPG.Y		M[+16], P[+16]	390.19	3	1168.56	1168.56	0	-1.1	17	Non	265.07	215.97	7.22	4.54	1125	>sp|P02817|AMELX_BOVIN Amelogenin, X isoform OS=Bos taurus OX=9913 GN=AMELX PE=1 SV=2	1	hf1_eb_18273_82_20032023.ScanId;v=1;d1=6074.6074.3	controllerType=0 controllerNumber=1 scan=6074	21.1609
04354:2	1	S.M[+15.995]PLPPHPGHP[+15.995]G.Y		M[+16], P[+16]	584.782	2	1168.56	1168.56	0	-0.5	17	Non	277.12	200.68	22.72	4.21	1125	>sp|P02817|AMELX_BOVIN Amelogenin, X isoform OS=Bos taurus OX=9913 GN=AMELX PE=1 SV=2	1	hf1_eb_18273_82_20032023.ScanId;v=1;d1=5699.5699.2	controllerType=0 controllerNumber=1 scan=5699	20.3845
04371:3	1	S.M[+15.995]PLPPHPGHP[+15.995]G.Y		M[+16], P[+16]	390.19	3	1168.55	1168.56	0	-1.9	17	Non	283.32	283.32	10.63	4.98	1125	>sp|P02817|AMELX_BOVIN Amelogenin, X isoform OS=Bos taurus OX=9913 GN=AMELX PE=1 SV=2	1	hf1_eb_18273_82_20032023.ScanId;v=1;d1=5715.5715.2	controllerType=0 controllerNumber=1 scan=5715	20.4191
07883:2	1	S.M[+15.995]PLPPHP[+31.990]GHPG.Y		M[+16], P[+32]	592.778	2	1184.55	1184.55	0	-2.4	17	Non	307.6	307.6	38.85	4.56	1125	>sp|P02817|AMELX_BOVIN Amelogenin, X isoform OS=Bos taurus OX=9913 GN=AMELX PE=1 SV=2	1	hf1_eb_18273_82_20032023.ScanId;v=1;d1=8588.8588.2	controllerType=0 controllerNumber=1 scan=8588	26.3782
03937:3	1	S.M[+15.995]PLPPHPGHP[+15.995]G.Y		M[+16], P[+16]	390.19	3	1168.56	1168.56	0	-0.7	17	Non	371.25	364.36	6.29	5.77	1125	>sp|P02817|AMELX_BOVIN Amelogenin, X isoform OS=Bos taurus OX=9913 GN=AMELX PE=1 SV=2	1	hf1_eb_18273_82_20032023.ScanId;v=1;d1=5328.5328.3	controllerType=0 controllerNumber=1 scan=5328	19.5243
08395:2	1	S.M[+15.995]PLPPHP[+31.990]GHPG.Y		M[+16], P[+32]	592.779	2	1184.55	1184.55	0	-0.7	17	Non	404.34	387.99	51.37	6.36	1125	>sp|P02817|AMELX_BOVIN Amelogenin, X isoform OS=Bos taurus OX=9913 GN=AMELX PE=1 SV=2	1	hf1_eb_18273_82_20032023.ScanId;v=1;d1=8990.8990.2	controllerType=0 controllerNumber=1 scan=8990	27.1797
08663:2	1	S.M[+15.995]PLPPHP[+31.990]GHPG.Y		M[+16], P[+32]	592.779	2	1184.55	1184.55	0	-1.3	17	Non	426.9	416.7	58.94	6.24	1125	>sp|P02817|AMELX_BOVIN Amelogenin, X isoform OS=Bos taurus OX=9913 GN=AMELX PE=1 SV=2	1	hf1_eb_18273_82_20032023.ScanId;v=1;d1=9208.9208.2	controllerType=0 controllerNumber=1 scan=9208	27.6174
08086:2	1	S.M[+15.995]PLPPHP[+31.990]GHPG.Y		M[+16], P[+32]	592.779	2	1184.55	1184.55	0	-1	17	Non	432.41	414.05	67.81	6.24	1125	>sp|P02817|AMELX_BOVIN Amelogenin, X isoform OS=Bos taurus OX=9913 GN=AMELX PE=1 SV=2	1	hf1_eb_18273_82_20032023.ScanId;v=1;d1=8754.8754.2	controllerType=0 controllerNumber=1 scan=8754	26.7296
12102:2	1	S.MPLPPHPGHPGY.I			650.317	2	1299.63	1299.63	0	-2.2	17	Non	389.8	341.17	341.17	5.34	1125	>sp|P02817|AMELX_BOVIN Amelogenin, X isoform OS=Bos taurus OX=9913 GN=AMELX PE=1 SV=2	1	hf1_eb_18273_82_20032023.ScanId;v=1;d1=11841.11841.2	controllerType=0 controllerNumber=1 scan=11841	32.6313
12587:2	1	S.MPLPPHPGHPGY.I			650.316	2	1299.63	1299.63	0	-3.8	17	Non	406.2	362.43	362.43	6.01	1125	>sp|P02817|AMELX_BOVIN Amelogenin, X isoform OS=Bos taurus OX=9913 GN=AMELX PE=1 SV=2	1	hf1_eb_18273_82_20032023.ScanId;v=1;d1=12208.12208.2	controllerType=0 controllerNumber=1 scan=12208	33.3336
12889:3	1	S.MPLPPHPGHPGY.I			433.881	3	1299.63	1299.63	0	-1.7	17	Non	408.16	358.72	358.72	5.18	1125	>sp|P02817|AMELX_BOVIN Amelogenin, X isoform OS=Bos taurus OX=9913 GN=AMELX PE=1 SV=2	1	hf1_eb_18273_82_20032023.ScanId;v=1;d1=12428.12428.3	controllerType=0 controllerNumber=1 scan=12428	33.7318
11890:3	1	S.MPLPPHPGHPGY.I			433.881	3	1299.63	1299.63	0	-1.6	17	Non	417	417	417	5.75	1125	>sp|P02817|AMELX_BOVIN Amelogenin, X isoform OS=Bos taurus OX=9913 GN=AMELX PE=1 SV=2	1	hf1_eb_18273_82_20032023.ScanId;v=1;d1=11682.11682.3	controllerType=0 controllerNumber=1 scan=11682	32.3319
12374:2	1	S.MPLPPHPGHPGY.I			650.315	2	1299.62	1299.63	0	-5.5	17	Non	452.65	411.12	411.12	5.18	1125	>sp|P02817|AMELX_BOVIN Amelogenin, X isoform OS=Bos taurus OX=9913 GN=AMELX PE=1 SV=2	1	hf1_eb_18273_82_20032023.ScanId;v=1;d1=12054.12054.2	controllerType=0 controllerNumber=1 scan=12054	33.0411
12133:3	1	S.MPLPPHPGHPGY.I			433.881	3	1299.63	1299.63	0	-1.8	17	Non	466.65	466.65	466.65	6.42	1125	>sp|P02817|AMELX_BOVIN Amelogenin, X isoform OS=Bos taurus OX=9913 GN=AMELX PE=1 SV=2	1	hf1_eb_18273_82_20032023.ScanId;v=1;d1=11866.11866.3	controllerType=0 controllerNumber=1 scan=11866	32.6825
12621:3	1	S.MPLPPHPGHPGY.I			433.881	3	1299.63	1299.63	0	-1.2	17	Non	470.4	470.4	470.4	6.01	1125	>sp|P02817|AMELX_BOVIN Amelogenin, X isoform OS=Bos taurus OX=9913 GN=AMELX PE=1 SV=2	1	hf1_eb_18273_82_20032023.ScanId;v=1;d1=12234.12234.3	controllerType=0 controllerNumber=1 scan=12234	33.3796
12368:3	1	S.MPLPPHPGHPGY.I			433.881	3	1299.63	1299.63	0	-1.5	17	Non	503.96	458.61	458.61	6.02	1125	>sp|P02817|AMELX_BOVIN Amelogenin, X isoform OS=Bos taurus OX=9913 GN=AMELX PE=1 SV=2	1	hf1_eb_18273_82_20032023.ScanId;v=1;d1=12049.12049.3	controllerType=0 controllerNumber=1 scan=12049	33.0318
12167:2	1	S.MPLPPHPGHPGY.I			650.317	2	1299.63	1299.63	0	-2.4	17	Non	571.68	485.1	485.1	6.47	1125	>sp|P02817|AMELX_BOVIN Amelogenin, X isoform OS=Bos taurus OX=9913 GN=AMELX PE=1 SV=2	1	hf1_eb_18273_82_20032023.ScanId;v=1;d1=11891.11891.2	controllerType=0 controllerNumber=1 scan=11891	32.7291
10802:3	1	S.MPLPPHPGHP[+15.995]GY.I		P[+16]	439.214	3	1315.63	1315.63	0	1.4	17	Non	93.1	93.1	0	0.52	1125	>sp|P02817|AMELX_BOVIN Amelogenin, X isoform OS=Bos taurus OX=9913 GN=AMELX PE=1 SV=2	1	hf1_eb_18273_82_20032023.ScanId;v=1;d1=10869.10869.3	controllerType=0 controllerNumber=1 scan=10869	30.8135
07925:3	1	S.MP[+15.995]LPPHPGHPGY.I		P[+16]	439.212	3	1315.62	1315.63	0	-2.2	17	Non	317.6	287.17	4	4.64	1125	>sp|P02817|AMELX_BOVIN Amelogenin, X isoform OS=Bos taurus OX=9913 GN=AMELX PE=1 SV=2	1	hf1_eb_18273_82_20032023.ScanId;v=1;d1=8623.8623.3	controllerType=0 controllerNumber=1 scan=8623	26.442
08116:3	1	S.MP[+15.995]LPPHPGHPGY.I		P[+16]	439.212	3	1315.62	1315.63	0	-2.6	17	Non	414.08	414.08	4	5.64	1125	>sp|P02817|AMELX_BOVIN Amelogenin, X isoform OS=Bos taurus OX=9913 GN=AMELX PE=1 SV=2	1	hf1_eb_18273_82_20032023.ScanId;v=1;d1=8780.8780.3	controllerType=0 controllerNumber=1 scan=8780	26.7818
08982:2	1	S.M[+15.995]PLPPHPGHPGY.I		M[+16]	658.313	2	1315.62	1315.63	0	-4.6	17	Non	419.36	412.22	20.66	5.03	1125	>sp|P02817|AMELX_BOVIN Amelogenin, X isoform OS=Bos taurus OX=9913 GN=AMELX PE=1 SV=2	1	hf1_eb_18273_82_20032023.ScanId;v=1;d1=9466.9466.2	controllerType=0 controllerNumber=1 scan=9466	28.1294
08766:2	1	S.M[+15.995]PLPPHPGHPGY.I		M[+16]	658.317	2	1315.63	1315.63	0	0.7	17	Non	427.88	357.47	47.82	5.66	1125	>sp|P02817|AMELX_BOVIN Amelogenin, X isoform OS=Bos taurus OX=9913 GN=AMELX PE=1 SV=2	1	hf1_eb_18273_82_20032023.ScanId;v=1;d1=9296.9296.2	controllerType=0 controllerNumber=1 scan=9296	27.7898
08354:3	1	S.M[+15.995]PLPPHPGHPGY.I		M[+16]	439.213	3	1315.62	1315.63	0	-0.3	17	Non	454.47	454.47	25.39	6.01	1125	>sp|P02817|AMELX_BOVIN Amelogenin, X isoform OS=Bos taurus OX=9913 GN=AMELX PE=1 SV=2	1	hf1_eb_18273_82_20032023.ScanId;v=1;d1=8958.8958.3	controllerType=0 controllerNumber=1 scan=8958	27.1176
08543:2	1	S.M[+15.995]PLPPHPGHPGY.I		M[+16]	658.311	2	1315.61	1315.63	0	-8.1	17	Non	518.6	480.92	60.61	4.93	1125	>sp|P02817|AMELX_BOVIN Amelogenin, X isoform OS=Bos taurus OX=9913 GN=AMELX PE=1 SV=2	1	hf1_eb_18273_82_20032023.ScanId;v=1;d1=9113.9113.2	controllerType=0 controllerNumber=1 scan=9113	27.4259
07361:3	1	S.M[+15.995]PLPPHPGHP[+15.995]GY.I		M[+16], P[+16]	444.544	3	1331.62	1331.62	0	-1.9	17	Non	222.69	222.69	3.74	2.47	1125	>sp|P02817|AMELX_BOVIN Amelogenin, X isoform OS=Bos taurus OX=9913 GN=AMELX PE=1 SV=2	1	hf1_eb_18273_82_20032023.ScanId;v=1;d1=8170.8170.3	controllerType=0 controllerNumber=1 scan=8170	25.5193
13200:3	1	S.MP[+15.995]LPPHPGHPGYI.N		P[+16]	476.908	3	1428.71	1428.71	0	-0.5	17	Non	102.97	102.97	5.8	0.61	1125	>sp|P02817|AMELX_BOVIN Amelogenin, X isoform OS=Bos taurus OX=9913 GN=AMELX PE=1 SV=2	1	hf1_eb_18273_82_20032023.ScanId;v=1;d1=12660.12660.2	controllerType=0 controllerNumber=1 scan=12660	34.1562
12152:3	1	S.MP[+15.995]LPPHPGHPGYI.N		P[+16]	476.908	3	1428.71	1428.71	0	-1	17	Non	174.56	174.56	15.95	2.77	1125	>sp|P02817|AMELX_BOVIN Amelogenin, X isoform OS=Bos taurus OX=9913 GN=AMELX PE=1 SV=2	1	hf1_eb_18273_82_20032023.ScanId;v=1;d1=11880.11880.2	controllerType=0 controllerNumber=1 scan=11880	32.7106
12625:3	1	S.M[+15.995]PLPPHPGHPGYI.N		M[+16]	476.908	3	1428.71	1428.71	0	-0.2	17	Non	394.93	394.93	8.78	6.18	1125	>sp|P02817|AMELX_BOVIN Amelogenin, X isoform OS=Bos taurus OX=9913 GN=AMELX PE=1 SV=2	1	hf1_eb_18273_82_20032023.ScanId;v=1;d1=12238.12238.3	controllerType=0 controllerNumber=1 scan=12238	33.3872
12887:3	1	S.M[+15.995]PLPPHPGHPGYI.N		M[+16]	476.908	3	1428.71	1428.71	0	0.1	17	Non	421.04	421.04	21.94	5.91	1125	>sp|P02817|AMELX_BOVIN Amelogenin, X isoform OS=Bos taurus OX=9913 GN=AMELX PE=1 SV=2	1	hf1_eb_18273_82_20032023.ScanId;v=1;d1=12427.12427.3	controllerType=0 controllerNumber=1 scan=12427	33.7303
14494:3	1	S.MPLPPHPGHPGYIN.F			509.591	3	1526.76	1526.76	0	-0.3	17	Non	192.33	192.33	192.33	2.42	1125	>sp|P02817|AMELX_BOVIN Amelogenin, X isoform OS=Bos taurus OX=9913 GN=AMELX PE=1 SV=2	1	hf1_eb_18273_82_20032023.ScanId;v=1;d1=13624.13624.3	controllerType=0 controllerNumber=1 scan=13624	35.9246
14251:3	1	S.MPLPPHPGHPGYIN.F			509.59	3	1526.76	1526.76	0	-0.5	17	Non	406.51	319.01	319.01	5.13	1125	>sp|P02817|AMELX_BOVIN Amelogenin, X isoform OS=Bos taurus OX=9913 GN=AMELX PE=1 SV=2	1	hf1_eb_18273_82_20032023.ScanId;v=1;d1=13442.13442.3	controllerType=0 controllerNumber=1 scan=13442	35.5739
10180:2	1	S.MP[+15.995]LPPHPGHPGYIN.F		P[+16]	771.88	2	1542.75	1542.75	0	-0.4	17	Non	211.12	197.36	4	2.78	1125	>sp|P02817|AMELX_BOVIN Amelogenin, X isoform OS=Bos taurus OX=9913 GN=AMELX PE=1 SV=2	1	hf1_eb_18273_82_20032023.ScanId;v=1;d1=10393.10393.2	controllerType=0 controllerNumber=1 scan=10393	29.9255
10431:2	1	S.M[+15.995]PLPPHPGHPGYIN.F		M[+16]	771.881	2	1542.75	1542.75	0	1.5	17	Non	283.22	283.22	12.01	5.51	1125	>sp|P02817|AMELX_BOVIN Amelogenin, X isoform OS=Bos taurus OX=9913 GN=AMELX PE=1 SV=2	1	hf1_eb_18273_82_20032023.ScanId;v=1;d1=10584.10584.2	controllerType=0 controllerNumber=1 scan=10584	30.2821
10125:3	1	S.M[+15.995]PLPPHPGHPGYIN.F		M[+16]	514.922	3	1542.75	1542.75	0	-0.6	17	Non	323.42	323.42	2.5	5.11	1125	>sp|P02817|AMELX_BOVIN Amelogenin, X isoform OS=Bos taurus OX=9913 GN=AMELX PE=1 SV=2	1	hf1_eb_18273_82_20032023.ScanId;v=1;d1=10349.10349.3	controllerType=0 controllerNumber=1 scan=10349	29.8403
10787:3	1	S.MP[+15.995]LPPHPGHPGYIN.F		P[+16]	514.922	3	1542.75	1542.75	0	0.3	17	Non	357.13	357.13	4	5.22	1125	>sp|P02817|AMELX_BOVIN Amelogenin, X isoform OS=Bos taurus OX=9913 GN=AMELX PE=1 SV=2	1	hf1_eb_18273_82_20032023.ScanId;v=1;d1=10858.10858.3	controllerType=0 controllerNumber=1 scan=10858	30.7921
10552:3	1	S.MP[+15.995]LPPHPGHPGYIN.F		P[+16]	514.922	3	1542.75	1542.75	0	0.1	17	Non	388.61	388.61	5.8	6.16	1125	>sp|P02817|AMELX_BOVIN Amelogenin, X isoform OS=Bos taurus OX=9913 GN=AMELX PE=1 SV=2	1	hf1_eb_18273_82_20032023.ScanId;v=1;d1=10674.10674.3	controllerType=0 controllerNumber=1 scan=10674	30.4465
15527:3	1	S.MPLPPHPGHPGYIN[+0.984].F		N[+1]	509.918	3	1527.74	1527.74	0	-0.9	17	Non	484.37	479.71	479.71	6.2	1125	>sp|P02817|AMELX_BOVIN Amelogenin, X isoform OS=Bos taurus OX=9913 GN=AMELX PE=1 SV=2	1	hf1_eb_18273_82_20032023.ScanId;v=1;d1=14394.14394.3	controllerType=0 controllerNumber=1 scan=14394	37.3784
15080:2	1	S.MPLPPHPGHPGYIN[+0.984].F		N[+1]	764.375	2	1527.74	1527.74	0	1.6	17	Non	487.77	383.32	383.32	6.44	1125	>sp|P02817|AMELX_BOVIN Amelogenin, X isoform OS=Bos taurus OX=9913 GN=AMELX PE=1 SV=2	1	hf1_eb_18273_82_20032023.ScanId;v=1;d1=14060.14060.2	controllerType=0 controllerNumber=1 scan=14060	36.754
16110:3	1	S.MPLPPHPGHPGYIN[+0.984].F		N[+1]	509.919	3	1527.74	1527.74	0	0	17	Non	510.2	492.48	492.48	6.2	1125	>sp|P02817|AMELX_BOVIN Amelogenin, X isoform OS=Bos taurus OX=9913 GN=AMELX PE=1 SV=2	1	hf1_eb_18273_82_20032023.ScanId;v=1;d1=14798.14798.3	controllerType=0 controllerNumber=1 scan=14798	38.0884
15271:3	1	S.MPLPPHPGHPGYIN[+0.984].F		N[+1]	509.918	3	1527.74	1527.74	0	-1.2	17	Non	546.57	541.93	541.93	6.7	1125	>sp|P02817|AMELX_BOVIN Amelogenin, X isoform OS=Bos taurus OX=9913 GN=AMELX PE=1 SV=2	1	hf1_eb_18273_82_20032023.ScanId;v=1;d1=14207.14207.3	controllerType=0 controllerNumber=1 scan=14207	37.0339
15031:3	1	S.MPLPPHPGHPGYIN[+0.984].F		N[+1]	509.917	3	1527.74	1527.74	0	-2.7	17	Non	569.59	493.72	493.72	6.39	1125	>sp|P02817|AMELX_BOVIN Amelogenin, X isoform OS=Bos taurus OX=9913 GN=AMELX PE=1 SV=2	1	hf1_eb_18273_82_20032023.ScanId;v=1;d1=14028.14028.3	controllerType=0 controllerNumber=1 scan=14028	36.696
15850:2	1	S.MPLPPHPGHPGYIN[+0.984].F		N[+1]	764.374	2	1527.74	1527.74	0	-0.4	17	Non	583.21	509.76	509.76	7.22	1125	>sp|P02817|AMELX_BOVIN Amelogenin, X isoform OS=Bos taurus OX=9913 GN=AMELX PE=1 SV=2	1	hf1_eb_18273_82_20032023.ScanId;v=1;d1=14623.14623.2	controllerType=0 controllerNumber=1 scan=14623	37.7985
15800:3	1	S.MPLPPHPGHPGYIN[+0.984].F		N[+1]	509.918	3	1527.74	1527.74	0	-0.4	17	Non	598.23	598.23	598.23	7.16	1125	>sp|P02817|AMELX_BOVIN Amelogenin, X isoform OS=Bos taurus OX=9913 GN=AMELX PE=1 SV=2	1	hf1_eb_18273_82_20032023.ScanId;v=1;d1=14588.14588.3	controllerType=0 controllerNumber=1 scan=14588	37.7331
15327:2	1	S.MPLPPHPGHPGYIN[+0.984].F		N[+1]	764.373	2	1527.74	1527.74	0	-1.1	17	Non	663.24	573.26	573.26	9.64	1125	>sp|P02817|AMELX_BOVIN Amelogenin, X isoform OS=Bos taurus OX=9913 GN=AMELX PE=1 SV=2	1	hf1_eb_18273_82_20032023.ScanId;v=1;d1=14249.14249.2	controllerType=0 controllerNumber=1 scan=14249	37.1094
15582:2	1	S.MPLPPHPGHPGYIN[+0.984].F		N[+1]	764.374	2	1527.74	1527.74	0	-0.9	17	Non	705.91	624.69	624.69	10.22	1125	>sp|P02817|AMELX_BOVIN Amelogenin, X isoform OS=Bos taurus OX=9913 GN=AMELX PE=1 SV=2	1	hf1_eb_18273_82_20032023.ScanId;v=1;d1=14433.14433.2	controllerType=0 controllerNumber=1 scan=14433	37.4496
12438:3	1	S.MP[+15.995]LPPHPGHPGYIN[+0.984].F		N[+1], P[+16]	515.25	3	1543.74	1543.74	0	-0.4	17	Non	60.36	60.36	2.73	0.33	1125	>sp|P02817|AMELX_BOVIN Amelogenin, X isoform OS=Bos taurus OX=9913 GN=AMELX PE=1 SV=2	1	hf1_eb_18273_82_20032023.ScanId;v=1;d1=12105.12105.2	controllerType=0 controllerNumber=1 scan=12105	33.1404
13893:3	1	S.MPLPPHPGHPGY[+15.995]IN[+0.984].F		N[+1], Y[+16]	515.249	3	1543.73	1543.74	0	-2.2	17	Non	121.2	94.8	0	0.34	1125	>sp|P02817|AMELX_BOVIN Amelogenin, X isoform OS=Bos taurus OX=9913 GN=AMELX PE=1 SV=2	1	hf1_eb_18273_82_20032023.ScanId;v=1;d1=13181.13181.3	controllerType=0 controllerNumber=1 scan=13181	35.1014
11671:3	1	S.MP[+15.995]LPPHPGHPGYIN[+0.984].F		N[+1], P[+16]	515.25	3	1543.73	1543.74	0	-1.3	17	Non	125.52	125.52	4	1.18	1125	>sp|P02817|AMELX_BOVIN Amelogenin, X isoform OS=Bos taurus OX=9913 GN=AMELX PE=1 SV=2	1	hf1_eb_18273_82_20032023.ScanId;v=1;d1=11521.11521.2	controllerType=0 controllerNumber=1 scan=11521	32.0228
14567:3	1	S.MPLPPHP[+15.995]GHPGYIN[+0.984].F		N[+1], P[+16]	515.25	3	1543.74	1543.74	0	-0.4	17	Non	201.94	201.94	4.42	2.18	1125	>sp|P02817|AMELX_BOVIN Amelogenin, X isoform OS=Bos taurus OX=9913 GN=AMELX PE=1 SV=2	1	hf1_eb_18273_82_20032023.ScanId;v=1;d1=13678.13678.3	controllerType=0 controllerNumber=1 scan=13678	36.0255
14176:3	1	S.MPLPPHPGHP[+15.995]GYIN[+0.984].F		N[+1], P[+16]	515.25	3	1543.74	1543.74	0	-0.4	17	Non	211.19	211.19	0.17	2.6	1125	>sp|P02817|AMELX_BOVIN Amelogenin, X isoform OS=Bos taurus OX=9913 GN=AMELX PE=1 SV=2	1	hf1_eb_18273_82_20032023.ScanId;v=1;d1=13390.13390.3	controllerType=0 controllerNumber=1 scan=13390	35.4777
12633:2	1	S.M[+15.995]PLPPHPGHPGYIN[+0.984].F		M[+16], N[+1]	772.371	2	1543.73	1543.74	0	-0.9	17	Non	290.49	288.42	32.92	5.64	1125	>sp|P02817|AMELX_BOVIN Amelogenin, X isoform OS=Bos taurus OX=9913 GN=AMELX PE=1 SV=2	1	hf1_eb_18273_82_20032023.ScanId;v=1;d1=12243.12243.2	controllerType=0 controllerNumber=1 scan=12243	33.3942
10902:2	1	S.M[+15.995]PLPPHPGHPGYIN[+0.984].F		M[+16], N[+1]	772.372	2	1543.74	1543.74	0	-0.2	17	Non	356.43	350.79	33.82	5.72	1125	>sp|P02817|AMELX_BOVIN Amelogenin, X isoform OS=Bos taurus OX=9913 GN=AMELX PE=1 SV=2	1	hf1_eb_18273_82_20032023.ScanId;v=1;d1=10941.10941.2	controllerType=0 controllerNumber=1 scan=10941	30.9435
12245:3	1	S.MP[+15.995]LPPHPGHPGYIN[+0.984].F		N[+1], P[+16]	515.25	3	1543.73	1543.74	0	-1.3	17	Non	386.93	386.93	4	6.18	1125	>sp|P02817|AMELX_BOVIN Amelogenin, X isoform OS=Bos taurus OX=9913 GN=AMELX PE=1 SV=2	1	hf1_eb_18273_82_20032023.ScanId;v=1;d1=11951.11951.3	controllerType=0 controllerNumber=1 scan=11951	32.8421
12729:3	1	S.MP[+15.995]LPPHPGHPGYIN[+0.984].F		N[+1], P[+16]	515.25	3	1543.73	1543.74	0	-1.4	17	Non	453.82	453.82	5.8	5.95	1125	>sp|P02817|AMELX_BOVIN Amelogenin, X isoform OS=Bos taurus OX=9913 GN=AMELX PE=1 SV=2	1	hf1_eb_18273_82_20032023.ScanId;v=1;d1=12315.12315.3	controllerType=0 controllerNumber=1 scan=12315	33.5319
12001:3	1	S.MP[+15.995]LPPHPGHPGYIN[+0.984].F		N[+1], P[+16]	515.25	3	1543.73	1543.74	0	-1	17	Non	472.02	472.02	4	6.18	1125	>sp|P02817|AMELX_BOVIN Amelogenin, X isoform OS=Bos taurus OX=9913 GN=AMELX PE=1 SV=2	1	hf1_eb_18273_82_20032023.ScanId;v=1;d1=11767.11767.3	controllerType=0 controllerNumber=1 scan=11767	32.4985
11772:3	1	S.M[+15.995]PLPPHPGHPGYIN[+0.984].F		M[+16], N[+1]	515.25	3	1543.73	1543.74	0	-1.3	17	Non	477.96	477.96	7.09	6.6	1125	>sp|P02817|AMELX_BOVIN Amelogenin, X isoform OS=Bos taurus OX=9913 GN=AMELX PE=1 SV=2	1	hf1_eb_18273_82_20032023.ScanId;v=1;d1=11595.11595.3	controllerType=0 controllerNumber=1 scan=11595	32.1622
11028:3	1	S.MP[+15.995]LPPHPGHPGYIN[+0.984].F		N[+1], P[+16]	515.25	3	1543.73	1543.74	0	-0.9	17	Non	479.58	479.58	4	6.18	1125	>sp|P02817|AMELX_BOVIN Amelogenin, X isoform OS=Bos taurus OX=9913 GN=AMELX PE=1 SV=2	1	hf1_eb_18273_82_20032023.ScanId;v=1;d1=11038.11038.3	controllerType=0 controllerNumber=1 scan=11038	31.1312
12353:2	1	S.M[+15.995]PLPPHPGHPGYIN[+0.984].F		M[+16], N[+1]	772.372	2	1543.74	1543.74	0	0	17	Non	482.04	385.51	56.6	6.45	1125	>sp|P02817|AMELX_BOVIN Amelogenin, X isoform OS=Bos taurus OX=9913 GN=AMELX PE=1 SV=2	1	hf1_eb_18273_82_20032023.ScanId;v=1;d1=12037.12037.2	controllerType=0 controllerNumber=1 scan=12037	33.0062
12477:3	1	S.M[+15.995]PLPPHPGHPGYIN[+0.984].F		M[+16], N[+1]	515.25	3	1543.74	1543.74	0	-0.5	17	Non	490.72	483.46	4.98	6.2	1125	>sp|P02817|AMELX_BOVIN Amelogenin, X isoform OS=Bos taurus OX=9913 GN=AMELX PE=1 SV=2	1	hf1_eb_18273_82_20032023.ScanId;v=1;d1=12133.12133.3	controllerType=0 controllerNumber=1 scan=12133	33.1913
11525:3	1	S.M[+15.995]PLPPHPGHPGYIN[+0.984].F		M[+16], N[+1]	515.25	3	1543.73	1543.74	0	-1.2	17	Non	526.36	526.36	7.62	6.7	1125	>sp|P02817|AMELX_BOVIN Amelogenin, X isoform OS=Bos taurus OX=9913 GN=AMELX PE=1 SV=2	1	hf1_eb_18273_82_20032023.ScanId;v=1;d1=11413.11413.3	controllerType=0 controllerNumber=1 scan=11413	31.8206
11276:3	1	S.M[+15.995]PLPPHPGHPGYIN[+0.984].F		M[+16], N[+1]	515.25	3	1543.74	1543.74	0	-0.3	17	Non	538.86	538.86	5.82	6.7	1125	>sp|P02817|AMELX_BOVIN Amelogenin, X isoform OS=Bos taurus OX=9913 GN=AMELX PE=1 SV=2	1	hf1_eb_18273_82_20032023.ScanId;v=1;d1=11225.11225.3	controllerType=0 controllerNumber=1 scan=11225	31.4709
12118:2	1	S.M[+15.995]PLPPHPGHPGYIN[+0.984].F		M[+16], N[+1]	772.371	2	1543.73	1543.74	0	-1.3	17	Non	577.25	534.62	50.23	6.99	1125	>sp|P02817|AMELX_BOVIN Amelogenin, X isoform OS=Bos taurus OX=9913 GN=AMELX PE=1 SV=2	1	hf1_eb_18273_82_20032023.ScanId;v=1;d1=11854.11854.2	controllerType=0 controllerNumber=1 scan=11854	32.6562
11873:2	1	S.M[+15.995]PLPPHPGHPGYIN[+0.984].F		M[+16], N[+1]	772.37	2	1543.73	1543.74	0	-2.2	17	Non	586.58	575.98	59.54	6.64	1125	>sp|P02817|AMELX_BOVIN Amelogenin, X isoform OS=Bos taurus OX=9913 GN=AMELX PE=1 SV=2	1	hf1_eb_18273_82_20032023.ScanId;v=1;d1=11670.11670.2	controllerType=0 controllerNumber=1 scan=11670	32.3094
11389:2	1	S.M[+15.995]PLPPHPGHPGYIN[+0.984].F		M[+16], N[+1]	772.371	2	1543.73	1543.74	0	-0.9	17	Non	597.1	557.17	69.82	7.22	1125	>sp|P02817|AMELX_BOVIN Amelogenin, X isoform OS=Bos taurus OX=9913 GN=AMELX PE=1 SV=2	1	hf1_eb_18273_82_20032023.ScanId;v=1;d1=11312.11312.2	controllerType=0 controllerNumber=1 scan=11312	31.6313
11142:2	1	S.M[+15.995]PLPPHPGHPGYIN[+0.984].F		M[+16], N[+1]	772.372	2	1543.74	1543.74	0	-0.1	17	Non	598.74	517	65.32	6.99	1125	>sp|P02817|AMELX_BOVIN Amelogenin, X isoform OS=Bos taurus OX=9913 GN=AMELX PE=1 SV=2	1	hf1_eb_18273_82_20032023.ScanId;v=1;d1=11123.11123.2	controllerType=0 controllerNumber=1 scan=11123	31.2857
11634:2	1	S.M[+15.995]PLPPHPGHPGYIN[+0.984].F		M[+16], N[+1]	772.37	2	1543.73	1543.74	0	-1.6	17	Non	649.18	614.02	72.32	8.64	1125	>sp|P02817|AMELX_BOVIN Amelogenin, X isoform OS=Bos taurus OX=9913 GN=AMELX PE=1 SV=2	1	hf1_eb_18273_82_20032023.ScanId;v=1;d1=11494.11494.2	controllerType=0 controllerNumber=1 scan=11494	31.9736
21869:2	1	S.MPLPPHPGHPGYINF.S			837.417	2	1673.83	1673.83	0	0.4	17	Non	254.02	254.02	254.02	5.6	1125	>sp|P02817|AMELX_BOVIN Amelogenin, X isoform OS=Bos taurus OX=9913 GN=AMELX PE=1 SV=2	1	hf1_eb_18273_82_20032023.ScanId;v=1;d1=19053.19053.2	controllerType=0 controllerNumber=1 scan=19053	45.7615
21375:2	1	S.MPLPPHPGHPGYINF.S			837.415	2	1673.82	1673.83	0	-1.9	17	Non	254.84	254.84	254.84	4.71	1125	>sp|P02817|AMELX_BOVIN Amelogenin, X isoform OS=Bos taurus OX=9913 GN=AMELX PE=1 SV=2	1	hf1_eb_18273_82_20032023.ScanId;v=1;d1=18696.18696.2	controllerType=0 controllerNumber=1 scan=18696	45.1246
21226:3	1	S.MPLPPHPGHPGYINF.S			558.613	3	1673.83	1673.83	0	-0.4	17	Non	320.03	293.01	293.01	4.81	1125	>sp|P02817|AMELX_BOVIN Amelogenin, X isoform OS=Bos taurus OX=9913 GN=AMELX PE=1 SV=2	1	hf1_eb_18273_82_20032023.ScanId;v=1;d1=18591.18591.3	controllerType=0 controllerNumber=1 scan=18591	44.9375
22299:3	1	S.MPLPPHPGHPGYINF.S			558.612	3	1673.82	1673.83	0	-1.7	17	Non	320.87	257.85	257.85	4.69	1125	>sp|P02817|AMELX_BOVIN Amelogenin, X isoform OS=Bos taurus OX=9913 GN=AMELX PE=1 SV=2	1	hf1_eb_18273_82_20032023.ScanId;v=1;d1=19369.19369.3	controllerType=0 controllerNumber=1 scan=19369	46.3206
21501:3	1	S.MPLPPHPGHPGYINF.S			558.613	3	1673.83	1673.83	0	0	17	Non	340.76	293.09	293.09	5.37	1125	>sp|P02817|AMELX_BOVIN Amelogenin, X isoform OS=Bos taurus OX=9913 GN=AMELX PE=1 SV=2	1	hf1_eb_18273_82_20032023.ScanId;v=1;d1=18782.18782.3	controllerType=0 controllerNumber=1 scan=18782	45.2786
17793:3	1	S.MP[+15.995]LPPHPGHPGYINF.S		P[+16]	563.944	3	1689.82	1689.82	0	-1.7	17	Non	34.62	34.62	4	0.66	1125	>sp|P02817|AMELX_BOVIN Amelogenin, X isoform OS=Bos taurus OX=9913 GN=AMELX PE=1 SV=2	1	hf1_eb_18273_82_20032023.ScanId;v=1;d1=16034.16034.2	controllerType=0 controllerNumber=1 scan=16034	40.2703
23085:3	1	S.MP[+15.995]LPPHPGHPGYINF.S		P[+16]	563.945	3	1689.82	1689.82	0	-0.4	17	Non	47.78	47.78	5.8	0.58	1125	>sp|P02817|AMELX_BOVIN Amelogenin, X isoform OS=Bos taurus OX=9913 GN=AMELX PE=1 SV=2	1	hf1_eb_18273_82_20032023.ScanId;v=1;d1=19923.19923.3	controllerType=0 controllerNumber=1 scan=19923	47.3335
15963:3	1	S.MP[+15.995]LPPHPGHPGYINF.S		P[+16]	563.944	3	1689.82	1689.82	0	-1.1	17	Non	93.46	93.46	4	0.71	1125	>sp|P02817|AMELX_BOVIN Amelogenin, X isoform OS=Bos taurus OX=9913 GN=AMELX PE=1 SV=2	1	hf1_eb_18273_82_20032023.ScanId;v=1;d1=14698.14698.3	controllerType=0 controllerNumber=1 scan=14698	37.9209
17541:3	1	S.MP[+15.995]LPPHPGHPGYINF.S		P[+16]	563.944	3	1689.82	1689.82	0	-1.9	17	Non	113.18	113.18	4	1.22	1125	>sp|P02817|AMELX_BOVIN Amelogenin, X isoform OS=Bos taurus OX=9913 GN=AMELX PE=1 SV=2	1	hf1_eb_18273_82_20032023.ScanId;v=1;d1=15840.15840.2	controllerType=0 controllerNumber=1 scan=15840	39.9139
19985:3	1	S.MP[+31.990]LPPHPGHPGYINF.S		P[+32]	569.278	3	1705.82	1705.82	0	1.4	17	Non	145.3	145.3	0	1.36	1125	>sp|P02817|AMELX_BOVIN Amelogenin, X isoform OS=Bos taurus OX=9913 GN=AMELX PE=1 SV=2	1	hf1_eb_18273_82_20032023.ScanId;v=1;d1=17647.17647.3	controllerType=0 controllerNumber=1 scan=17647	43.176
24916:3	1	S.MPLPPHPGHPGYIN[+0.984]F.S		N[+1]	558.941	3	1674.81	1674.81	0	-0.7	17	Non	187.42	187.42	187.42	2.17	1125	>sp|P02817|AMELX_BOVIN Amelogenin, X isoform OS=Bos taurus OX=9913 GN=AMELX PE=1 SV=2	1	hf1_eb_18273_82_20032023.ScanId;v=1;d1=21243.21243.3	controllerType=0 controllerNumber=1 scan=21243	49.7408
18058:3	1	S.MP[+15.995]LPPHPGHPGYINF.S		P[+16]	563.944	3	1689.82	1689.82	0	-1.7	17	Non	231.37	220.54	4	2.8	1125	>sp|P02817|AMELX_BOVIN Amelogenin, X isoform OS=Bos taurus OX=9913 GN=AMELX PE=1 SV=2	1	hf1_eb_18273_82_20032023.ScanId;v=1;d1=16233.16233.3	controllerType=0 controllerNumber=1 scan=16233	40.6261
18328:3	1	S.MP[+15.995]LPPHPGHPGYINF.S		P[+16]	563.944	3	1689.82	1689.82	0	-1.4	17	Non	244.78	244.78	4	4.57	1125	>sp|P02817|AMELX_BOVIN Amelogenin, X isoform OS=Bos taurus OX=9913 GN=AMELX PE=1 SV=2	1	hf1_eb_18273_82_20032023.ScanId;v=1;d1=16429.16429.3	controllerType=0 controllerNumber=1 scan=16429	40.9701
24179:3	1	S.MPLPPHPGHPGYIN[+0.984]F.S		N[+1]	558.941	3	1674.81	1674.81	0	-0.8	17	Non	266.53	266.53	266.53	4.11	1125	>sp|P02817|AMELX_BOVIN Amelogenin, X isoform OS=Bos taurus OX=9913 GN=AMELX PE=1 SV=2	1	hf1_eb_18273_82_20032023.ScanId;v=1;d1=20702.20702.3	controllerType=0 controllerNumber=1 scan=20702	48.7608
17796:3	1	S.MP[+15.995]LPPHPGHPGYINF.S		P[+16]	563.944	3	1689.82	1689.82	0	-1.7	17	Non	286.33	286.33	4	5.4	1125	>sp|P02817|AMELX_BOVIN Amelogenin, X isoform OS=Bos taurus OX=9913 GN=AMELX PE=1 SV=2	1	hf1_eb_18273_82_20032023.ScanId;v=1;d1=16036.16036.3	controllerType=0 controllerNumber=1 scan=16036	40.2723
18832:3	1	S.MP[+15.995]LPPHPGHPGYINF.S		P[+16]	563.945	3	1689.82	1689.82	0	0.2	17	Non	290.51	290.51	4	4.83	1125	>sp|P02817|AMELX_BOVIN Amelogenin, X isoform OS=Bos taurus OX=9913 GN=AMELX PE=1 SV=2	1	hf1_eb_18273_82_20032023.ScanId;v=1;d1=16808.16808.3	controllerType=0 controllerNumber=1 scan=16808	41.6493
21870:2	1	S.MPLPPHPGHPGYIN[+0.984]F.S		N[+1]	837.907	2	1674.81	1674.81	0	-2.4	17	Non	299.03	299.03	299.03	5.54	1125	>sp|P02817|AMELX_BOVIN Amelogenin, X isoform OS=Bos taurus OX=9913 GN=AMELX PE=1 SV=2	1	hf1_eb_18273_82_20032023.ScanId;v=1;d1=19053.19053.2	controllerType=0 controllerNumber=1 scan=19053	45.7615
17537:3	1	S.MP[+15.995]LPPHPGHPGYINF.S		P[+16]	563.944	3	1689.82	1689.82	0	-1.9	17	Non	303.7	303.7	4	4.85	1125	>sp|P02817|AMELX_BOVIN Amelogenin, X isoform OS=Bos taurus OX=9913 GN=AMELX PE=1 SV=2	1	hf1_eb_18273_82_20032023.ScanId;v=1;d1=15837.15837.3	controllerType=0 controllerNumber=1 scan=15837	39.91
23900:3	1	S.MPLPPHPGHPGYIN[+0.984]F.S		N[+1]	558.941	3	1674.81	1674.81	0	-0.7	17	Non	327.44	327.44	327.44	5.48	1125	>sp|P02817|AMELX_BOVIN Amelogenin, X isoform OS=Bos taurus OX=9913 GN=AMELX PE=1 SV=2	1	hf1_eb_18273_82_20032023.ScanId;v=1;d1=20504.20504.3	controllerType=0 controllerNumber=1 scan=20504	48.4013
18556:3	1	S.M[+15.995]PLPPHPGHPGYINF.S		M[+16]	563.944	3	1689.82	1689.82	0	-0.9	17	Non	349.8	349.8	5.69	5.48	1125	>sp|P02817|AMELX_BOVIN Amelogenin, X isoform OS=Bos taurus OX=9913 GN=AMELX PE=1 SV=2	1	hf1_eb_18273_82_20032023.ScanId;v=1;d1=16613.16613.3	controllerType=0 controllerNumber=1 scan=16613	41.31
17266:3	1	S.M[+15.995]PLPPHPGHPGYINF.S		M[+16]	563.943	3	1689.81	1689.82	0	-3.9	17	Non	363.1	361.75	1.74	5.41	1125	>sp|P02817|AMELX_BOVIN Amelogenin, X isoform OS=Bos taurus OX=9913 GN=AMELX PE=1 SV=2	1	hf1_eb_18273_82_20032023.ScanId;v=1;d1=15634.15634.3	controllerType=0 controllerNumber=1 scan=15634	39.5511
23640:2	1	S.MPLPPHPGHPGYIN[+0.984]F.S		N[+1]	837.909	2	1674.81	1674.81	0	0.9	17	Non	375.72	344.82	344.82	6.09	1125	>sp|P02817|AMELX_BOVIN Amelogenin, X isoform OS=Bos taurus OX=9913 GN=AMELX PE=1 SV=2	1	hf1_eb_18273_82_20032023.ScanId;v=1;d1=20322.20322.2	controllerType=0 controllerNumber=1 scan=20322	48.0766
19071:2	1	S.M[+15.995]PLPPHPGHPGYINF.S		M[+16]	845.414	2	1689.82	1689.82	0	0.6	17	Non	395.76	355.04	14.58	6.09	1125	>sp|P02817|AMELX_BOVIN Amelogenin, X isoform OS=Bos taurus OX=9913 GN=AMELX PE=1 SV=2	1	hf1_eb_18273_82_20032023.ScanId;v=1;d1=16973.16973.2	controllerType=0 controllerNumber=1 scan=16973	41.9445
22300:3	1	S.MPLPPHPGHPGYIN[+0.984]F.S		N[+1]	558.938	3	1674.8	1674.81	0	-5.4	17	Non	423.18	415.16	415.16	5.09	1125	>sp|P02817|AMELX_BOVIN Amelogenin, X isoform OS=Bos taurus OX=9913 GN=AMELX PE=1 SV=2	1	hf1_eb_18273_82_20032023.ScanId;v=1;d1=19369.19369.3	controllerType=0 controllerNumber=1 scan=19369	46.3206
22821:3	1	S.MPLPPHPGHPGYIN[+0.984]F.S		N[+1]	558.942	3	1674.81	1674.81	0	0.7	17	Non	425.71	425.71	425.71	6.39	1125	>sp|P02817|AMELX_BOVIN Amelogenin, X isoform OS=Bos taurus OX=9913 GN=AMELX PE=1 SV=2	1	hf1_eb_18273_82_20032023.ScanId;v=1;d1=19743.19743.3	controllerType=0 controllerNumber=1 scan=19743	47.0085
23619:3	1	S.MPLPPHPGHPGYIN[+0.984]F.S		N[+1]	558.941	3	1674.81	1674.81	0	-1.1	17	Non	439.71	439.71	439.71	6.41	1125	>sp|P02817|AMELX_BOVIN Amelogenin, X isoform OS=Bos taurus OX=9913 GN=AMELX PE=1 SV=2	1	hf1_eb_18273_82_20032023.ScanId;v=1;d1=20306.20306.3	controllerType=0 controllerNumber=1 scan=20306	48.0474
22030:3	1	S.MPLPPHPGHPGYIN[+0.984]F.S		N[+1]	558.941	3	1674.81	1674.81	0	-0.8	17	Non	448.56	448.56	448.56	6.2	1125	>sp|P02817|AMELX_BOVIN Amelogenin, X isoform OS=Bos taurus OX=9913 GN=AMELX PE=1 SV=2	1	hf1_eb_18273_82_20032023.ScanId;v=1;d1=19175.19175.3	controllerType=0 controllerNumber=1 scan=19175	45.981
21763:3	1	S.MPLPPHPGHPGYIN[+0.984]F.S		N[+1]	558.94	3	1674.8	1674.81	0	-3.2	17	Non	450.41	450.41	450.41	6.08	1125	>sp|P02817|AMELX_BOVIN Amelogenin, X isoform OS=Bos taurus OX=9913 GN=AMELX PE=1 SV=2	1	hf1_eb_18273_82_20032023.ScanId;v=1;d1=18974.18974.3	controllerType=0 controllerNumber=1 scan=18974	45.6258
23095:3	1	S.MPLPPHPGHPGYIN[+0.984]F.S		N[+1]	558.943	3	1674.81	1674.81	0	2.2	17	Non	461.45	461.45	461.45	5.28	1125	>sp|P02817|AMELX_BOVIN Amelogenin, X isoform OS=Bos taurus OX=9913 GN=AMELX PE=1 SV=2	1	hf1_eb_18273_82_20032023.ScanId;v=1;d1=19929.19929.3	controllerType=0 controllerNumber=1 scan=19929	47.3453
17708:2	1	S.M[+15.995]PLPPHPGHPGYINF.S		M[+16]	845.412	2	1689.82	1689.82	0	-1.9	17	Non	472.16	428.93	22.92	6.68	1125	>sp|P02817|AMELX_BOVIN Amelogenin, X isoform OS=Bos taurus OX=9913 GN=AMELX PE=1 SV=2	1	hf1_eb_18273_82_20032023.ScanId;v=1;d1=15969.15969.2	controllerType=0 controllerNumber=1 scan=15969	40.1487
18482:2	1	S.M[+15.995]PLPPHPGHPGYINF.S		M[+16]	845.414	2	1689.82	1689.82	0	0.4	17	Non	483.39	426.02	21.52	6.8	1125	>sp|P02817|AMELX_BOVIN Amelogenin, X isoform OS=Bos taurus OX=9913 GN=AMELX PE=1 SV=2	1	hf1_eb_18273_82_20032023.ScanId;v=1;d1=16553.16553.2	controllerType=0 controllerNumber=1 scan=16553	41.1994
22574:3	1	S.MPLPPHPGHPGYIN[+0.984]F.S		N[+1]	558.942	3	1674.81	1674.81	0	0.1	17	Non	483.78	483.78	483.78	6.45	1125	>sp|P02817|AMELX_BOVIN Amelogenin, X isoform OS=Bos taurus OX=9913 GN=AMELX PE=1 SV=2	1	hf1_eb_18273_82_20032023.ScanId;v=1;d1=19566.19566.3	controllerType=0 controllerNumber=1 scan=19566	46.6732
23359:3	1	S.MPLPPHPGHPGYIN[+0.984]F.S		N[+1]	558.941	3	1674.81	1674.81	0	-1.2	17	Non	483.91	483.91	483.91	6.21	1125	>sp|P02817|AMELX_BOVIN Amelogenin, X isoform OS=Bos taurus OX=9913 GN=AMELX PE=1 SV=2	1	hf1_eb_18273_82_20032023.ScanId;v=1;d1=20116.20116.3	controllerType=0 controllerNumber=1 scan=20116	47.6979
18793:2	1	S.M[+15.995]PLPPHPGHPGYINF.S		M[+16]	845.415	2	1689.82	1689.82	0	1.2	17	Non	518.62	481.25	23.37	6.8	1125	>sp|P02817|AMELX_BOVIN Amelogenin, X isoform OS=Bos taurus OX=9913 GN=AMELX PE=1 SV=2	1	hf1_eb_18273_82_20032023.ScanId;v=1;d1=16780.16780.2	controllerType=0 controllerNumber=1 scan=16780	41.6014
22593:2	1	S.MPLPPHPGHPGYIN[+0.984]F.S		N[+1]	837.909	2	1674.81	1674.81	0	0.7	17	Non	565.65	539.95	539.95	7.46	1125	>sp|P02817|AMELX_BOVIN Amelogenin, X isoform OS=Bos taurus OX=9913 GN=AMELX PE=1 SV=2	1	hf1_eb_18273_82_20032023.ScanId;v=1;d1=19577.19577.2	controllerType=0 controllerNumber=1 scan=19577	46.6921
22833:2	1	S.MPLPPHPGHPGYIN[+0.984]F.S		N[+1]	837.909	2	1674.81	1674.81	0	0.4	17	Non	592.61	592.61	592.61	7.87	1125	>sp|P02817|AMELX_BOVIN Amelogenin, X isoform OS=Bos taurus OX=9913 GN=AMELX PE=1 SV=2	1	hf1_eb_18273_82_20032023.ScanId;v=1;d1=19752.19752.2	controllerType=0 controllerNumber=1 scan=19752	47.0275
23380:2	1	S.MPLPPHPGHPGYIN[+0.984]F.S		N[+1]	837.907	2	1674.81	1674.81	0	-2.1	17	Non	611.02	611.02	611.02	8.54	1125	>sp|P02817|AMELX_BOVIN Amelogenin, X isoform OS=Bos taurus OX=9913 GN=AMELX PE=1 SV=2	1	hf1_eb_18273_82_20032023.ScanId;v=1;d1=20131.20131.2	controllerType=0 controllerNumber=1 scan=20131	47.7259
23118:2	1	S.MPLPPHPGHPGYIN[+0.984]F.S		N[+1]	837.908	2	1674.81	1674.81	0	-0.9	17	Non	667.72	664.68	664.68	9.89	1125	>sp|P02817|AMELX_BOVIN Amelogenin, X isoform OS=Bos taurus OX=9913 GN=AMELX PE=1 SV=2	1	hf1_eb_18273_82_20032023.ScanId;v=1;d1=19945.19945.2	controllerType=0 controllerNumber=1 scan=19945	47.3737
24163:2	1	S.MP[+15.995]LPPH[+15.995]PGHPGYINF.S		H[+16], P[+16]	853.412	2	1705.82	1705.82	0	0.7	17	Non	8.17	8.17	0	0.62	1125	>sp|P02817|AMELX_BOVIN Amelogenin, X isoform OS=Bos taurus OX=9913 GN=AMELX PE=1 SV=2	1	hf1_eb_18273_82_20032023.ScanId;v=1;d1=20692.20692.2	controllerType=0 controllerNumber=1 scan=20692	48.7431
18624:2	1	S.MPLP[+31.990]PHPGHPGYIN[+0.984]F.S		N[+1], P[+32]	853.903	2	1706.8	1706.8	0	-0.2	17	Non	34.43	26.34	4.67	0.61	1125	>sp|P02817|AMELX_BOVIN Amelogenin, X isoform OS=Bos taurus OX=9913 GN=AMELX PE=1 SV=2	1	hf1_eb_18273_82_20032023.ScanId;v=1;d1=16659.16659.2	controllerType=0 controllerNumber=1 scan=16659	41.3881
20333:3	1	S.MP[+15.995]LPPHPGHPGYIN[+0.984]F.S		N[+1], P[+16]	564.272	3	1690.8	1690.8	0	-2.6	17	Non	42.42	42.42	4	0.32	1125	>sp|P02817|AMELX_BOVIN Amelogenin, X isoform OS=Bos taurus OX=9913 GN=AMELX PE=1 SV=2	1	hf1_eb_18273_82_20032023.ScanId;v=1;d1=17938.17938.3	controllerType=0 controllerNumber=1 scan=17938	43.7255
18411:3	1	S.MPLP[+31.990]PHPGHPGYIN[+0.984]F.S		N[+1], P[+32]	569.604	3	1706.8	1706.8	0	-2.1	17	Non	47.32	47.32	0	0.32	1125	>sp|P02817|AMELX_BOVIN Amelogenin, X isoform OS=Bos taurus OX=9913 GN=AMELX PE=1 SV=2	1	hf1_eb_18273_82_20032023.ScanId;v=1;d1=16494.16494.3	controllerType=0 controllerNumber=1 scan=16494	41.0901
19399:3	1	S.MP[+15.995]LPPHPGHPGYIN[+0.984]F.S		N[+1], P[+16]	564.274	3	1690.81	1690.8	0	1.4	17	Non	49.44	49.44	4	0.58	1125	>sp|P02817|AMELX_BOVIN Amelogenin, X isoform OS=Bos taurus OX=9913 GN=AMELX PE=1 SV=2	1	hf1_eb_18273_82_20032023.ScanId;v=1;d1=17213.17213.2	controllerType=0 controllerNumber=1 scan=17213	42.3789
19852:3	1	S.MP[+15.995]LPPHPGHPGYIN[+0.984]F.S		N[+1], P[+16]	564.273	3	1690.8	1690.8	0	0.1	17	Non	51.15	51.15	4	0.58	1125	>sp|P02817|AMELX_BOVIN Amelogenin, X isoform OS=Bos taurus OX=9913 GN=AMELX PE=1 SV=2	1	hf1_eb_18273_82_20032023.ScanId;v=1;d1=17548.17548.3	controllerType=0 controllerNumber=1 scan=17548	42.9922
17090:3	1	S.MP[+15.995]LPPHPGHP[+15.995]GYINF.S		P[+16]*2	569.275	3	1705.81	1705.82	0	-2.3	17	Non	63.74	63.74	0	0.32	1125	>sp|P02817|AMELX_BOVIN Amelogenin, X isoform OS=Bos taurus OX=9913 GN=AMELX PE=1 SV=2	1	hf1_eb_18273_82_20032023.ScanId;v=1;d1=15504.15504.2	controllerType=0 controllerNumber=1 scan=15504	39.3077
17021:3	1	S.M[+31.990]PLPPHPGHPGYIN[+0.984]F.S		M[+32], N[+1]	569.603	3	1706.79	1706.8	0	-3	17	Non	75.62	75.62	0	0.32	1125	>sp|P02817|AMELX_BOVIN Amelogenin, X isoform OS=Bos taurus OX=9913 GN=AMELX PE=1 SV=2	1	hf1_eb_18273_82_20032023.ScanId;v=1;d1=15450.15450.3	controllerType=0 controllerNumber=1 scan=15450	39.2131
17885:3	1	S.M[+31.990]PLPPHPGHPGYIN[+0.984]F.S		M[+32], N[+1]	569.604	3	1706.8	1706.8	0	-1.6	17	Non	83.15	83.15	0	1.22	1125	>sp|P02817|AMELX_BOVIN Amelogenin, X isoform OS=Bos taurus OX=9913 GN=AMELX PE=1 SV=2	1	hf1_eb_18273_82_20032023.ScanId;v=1;d1=16105.16105.3	controllerType=0 controllerNumber=1 scan=16105	40.3953
37306:3	1	S.MP[+15.995]LPPHPGHPGYIN[+0.984]F.S		N[+1], P[+16]	564.273	3	1690.8	1690.8	0	-0.2	17	Non	93.94	93.94	4	2.13	1125	>sp|P02817|AMELX_BOVIN Amelogenin, X isoform OS=Bos taurus OX=9913 GN=AMELX PE=1 SV=2	1	hf1_eb_18273_82_20032023.ScanId;v=1;d1=31226.31226.3	controllerType=0 controllerNumber=1 scan=31226	73.3281
17884:3	1	S.MP[+15.995]LPPHP[+15.995]GHPGYINF.S		P[+16]*2	569.277	3	1705.81	1705.82	0	-0.4	17	Non	110.96	110.96	4	1.22	1125	>sp|P02817|AMELX_BOVIN Amelogenin, X isoform OS=Bos taurus OX=9913 GN=AMELX PE=1 SV=2	1	hf1_eb_18273_82_20032023.ScanId;v=1;d1=16105.16105.3	controllerType=0 controllerNumber=1 scan=16105	40.3953
18122:2	1	S.M[+31.990]PLPPHPGHPGYIN[+0.984]F.S		M[+32], N[+1]	853.902	2	1706.8	1706.8	0	-1.2	17	Non	114.02	94.39	0	1.74	1125	>sp|P02817|AMELX_BOVIN Amelogenin, X isoform OS=Bos taurus OX=9913 GN=AMELX PE=1 SV=2	1	hf1_eb_18273_82_20032023.ScanId;v=1;d1=16279.16279.2	controllerType=0 controllerNumber=1 scan=16279	40.7043
23086:3	1	S.MP[+15.995]LPPHPGHPGYIN[+0.984]F.S		N[+1], P[+16]	564.271	3	1690.8	1690.8	0	-3.1	17	Non	114.75	88.79	5.8	0.58	1125	>sp|P02817|AMELX_BOVIN Amelogenin, X isoform OS=Bos taurus OX=9913 GN=AMELX PE=1 SV=2	1	hf1_eb_18273_82_20032023.ScanId;v=1;d1=19923.19923.3	controllerType=0 controllerNumber=1 scan=19923	47.3335
17639:3	1	S.M[+31.990]PLPPHPGHPGYIN[+0.984]F.S		M[+32], N[+1]	569.602	3	1706.79	1706.8	0	-4.3	17	Non	137.1	119.06	8.31	0.35	1125	>sp|P02817|AMELX_BOVIN Amelogenin, X isoform OS=Bos taurus OX=9913 GN=AMELX PE=1 SV=2	1	hf1_eb_18273_82_20032023.ScanId;v=1;d1=15915.15915.3	controllerType=0 controllerNumber=1 scan=15915	40.0472
18932:3	1	S.M[+31.990]PLPPHPGHPGYIN[+0.984]F.S		M[+32], N[+1]	569.604	3	1706.8	1706.8	0	-1.4	17	Non	137.16	137.16	0	1.37	1125	>sp|P02817|AMELX_BOVIN Amelogenin, X isoform OS=Bos taurus OX=9913 GN=AMELX PE=1 SV=2	1	hf1_eb_18273_82_20032023.ScanId;v=1;d1=16876.16876.3	controllerType=0 controllerNumber=1 scan=16876	41.7713
17373:3	1	S.MP[+15.995]LPPH[+15.995]PGHPGYINF.S		H[+16], P[+16]	569.276	3	1705.81	1705.82	0	-1.9	17	Non	148.22	148.22	4	1.37	1125	>sp|P02817|AMELX_BOVIN Amelogenin, X isoform OS=Bos taurus OX=9913 GN=AMELX PE=1 SV=2	1	hf1_eb_18273_82_20032023.ScanId;v=1;d1=15718.15718.3	controllerType=0 controllerNumber=1 scan=15718	39.6999
22753:3	1	S.MP[+15.995]LPPHPGHPGYIN[+0.984]F.S		N[+1], P[+16]	564.273	3	1690.8	1690.8	0	-1	17	Non	152.14	147.28	5.8	1.37	1125	>sp|P02817|AMELX_BOVIN Amelogenin, X isoform OS=Bos taurus OX=9913 GN=AMELX PE=1 SV=2	1	hf1_eb_18273_82_20032023.ScanId;v=1;d1=19692.19692.3	controllerType=0 controllerNumber=1 scan=19692	46.9119
18657:3	1	S.M[+31.990]PLPPHPGHPGYIN[+0.984]F.S		M[+32], N[+1]	569.604	3	1706.8	1706.8	0	-0.6	17	Non	152.62	152.62	0	1.37	1125	>sp|P02817|AMELX_BOVIN Amelogenin, X isoform OS=Bos taurus OX=9913 GN=AMELX PE=1 SV=2	1	hf1_eb_18273_82_20032023.ScanId;v=1;d1=16684.16684.3	controllerType=0 controllerNumber=1 scan=16684	41.4319
19463:3	1	S.M[+31.990]PLPPHPGHPGYIN[+0.984]F.S		M[+32], N[+1]	569.603	3	1706.79	1706.8	0	-2.9	17	Non	161.28	161.28	0	2.35	1125	>sp|P02817|AMELX_BOVIN Amelogenin, X isoform OS=Bos taurus OX=9913 GN=AMELX PE=1 SV=2	1	hf1_eb_18273_82_20032023.ScanId;v=1;d1=17265.17265.3	controllerType=0 controllerNumber=1 scan=17265	42.4781
16498:3	1	S.MP[+15.995]LPPHPGHP[+15.995]GYINF.S		P[+16]*2	569.276	3	1705.81	1705.82	0	-0.7	17	Non	166.01	166.01	4	2.17	1125	>sp|P02817|AMELX_BOVIN Amelogenin, X isoform OS=Bos taurus OX=9913 GN=AMELX PE=1 SV=2	1	hf1_eb_18273_82_20032023.ScanId;v=1;d1=15074.15074.3	controllerType=0 controllerNumber=1 scan=15074	38.5687
21613:3	1	S.MPLPPHP[+15.995]GHPGYIN[+0.984]F.S		N[+1], P[+16]	564.273	3	1690.8	1690.8	0	-0.6	17	Non	173.36	173.36	1.54	2.17	1125	>sp|P02817|AMELX_BOVIN Amelogenin, X isoform OS=Bos taurus OX=9913 GN=AMELX PE=1 SV=2	1	hf1_eb_18273_82_20032023.ScanId;v=1;d1=18864.18864.3	controllerType=0 controllerNumber=1 scan=18864	45.4301
20787:2	1	S.MP[+15.995]LPPHPGHPGYIN[+0.984]F.S		N[+1], P[+16]	845.905	2	1690.8	1690.8	0	-1.5	17	Non	184.33	184.33	4	2.42	1125	>sp|P02817|AMELX_BOVIN Amelogenin, X isoform OS=Bos taurus OX=9913 GN=AMELX PE=1 SV=2	1	hf1_eb_18273_82_20032023.ScanId;v=1;d1=18275.18275.2	controllerType=0 controllerNumber=1 scan=18275	44.3566
19221:3	1	S.M[+31.990]PLPPHPGHPGYIN[+0.984]F.S		M[+32], N[+1]	569.603	3	1706.8	1706.8	0	-2.4	17	Non	189.43	189.43	15.11	2.35	1125	>sp|P02817|AMELX_BOVIN Amelogenin, X isoform OS=Bos taurus OX=9913 GN=AMELX PE=1 SV=2	1	hf1_eb_18273_82_20032023.ScanId;v=1;d1=17077.17077.3	controllerType=0 controllerNumber=1 scan=17077	42.1271
17846:2	1	S.M[+31.990]PLPPHPGHPGYIN[+0.984]F.S		M[+32], N[+1]	853.903	2	1706.8	1706.8	0	-1	17	Non	200.89	118.59	0	2.34	1125	>sp|P02817|AMELX_BOVIN Amelogenin, X isoform OS=Bos taurus OX=9913 GN=AMELX PE=1 SV=2	1	hf1_eb_18273_82_20032023.ScanId;v=1;d1=16075.16075.2	controllerType=0 controllerNumber=1 scan=16075	40.3418
22485:3	1	S.MPLPP[+15.995]HPGHPGYIN[+0.984]F.S		N[+1], P[+16]	564.273	3	1690.8	1690.8	0	-0.8	17	Non	226.14	226.14	0	2.8	1125	>sp|P02817|AMELX_BOVIN Amelogenin, X isoform OS=Bos taurus OX=9913 GN=AMELX PE=1 SV=2	1	hf1_eb_18273_82_20032023.ScanId;v=1;d1=19505.19505.3	controllerType=0 controllerNumber=1 scan=19505	46.5603
20207:3	1	S.M[+31.990]PLPPHPGHPGYIN[+0.984]F.S		M[+32], N[+1]	569.604	3	1706.8	1706.8	0	-1.9	17	Non	266.58	266.58	0	4.57	1125	>sp|P02817|AMELX_BOVIN Amelogenin, X isoform OS=Bos taurus OX=9913 GN=AMELX PE=1 SV=2	1	hf1_eb_18273_82_20032023.ScanId;v=1;d1=17833.17833.3	controllerType=0 controllerNumber=1 scan=17833	43.531
19710:3	1	S.M[+31.990]PLPPHPGHPGYIN[+0.984]F.S		M[+32], N[+1]	569.604	3	1706.8	1706.8	0	-2.2	17	Non	272.23	256.83	0	4.22	1125	>sp|P02817|AMELX_BOVIN Amelogenin, X isoform OS=Bos taurus OX=9913 GN=AMELX PE=1 SV=2	1	hf1_eb_18273_82_20032023.ScanId;v=1;d1=17449.17449.3	controllerType=0 controllerNumber=1 scan=17449	42.8208
20639:2	1	S.M[+15.995]PLPPHPGHPGYIN[+0.984]F.S		M[+16], N[+1]	845.907	2	1690.81	1690.8	0	0.9	17	Non	276.06	276.06	27.14	5.04	1125	>sp|P02817|AMELX_BOVIN Amelogenin, X isoform OS=Bos taurus OX=9913 GN=AMELX PE=1 SV=2	1	hf1_eb_18273_82_20032023.ScanId;v=1;d1=18164.18164.2	controllerType=0 controllerNumber=1 scan=18164	44.1567
21342:3	1	S.M[+15.995]PLPPHPGHPGYIN[+0.984]F.S		M[+16], N[+1]	564.273	3	1690.8	1690.8	0	-0.1	17	Non	318.93	318.93	5.12	4.85	1125	>sp|P02817|AMELX_BOVIN Amelogenin, X isoform OS=Bos taurus OX=9913 GN=AMELX PE=1 SV=2	1	hf1_eb_18273_82_20032023.ScanId;v=1;d1=18675.18675.3	controllerType=0 controllerNumber=1 scan=18675	45.088
21196:3	1	S.M[+31.990]PLPPHPGHPGYIN[+0.984]F.S		M[+32], N[+1]	569.604	3	1706.8	1706.8	0	-1.2	17	Non	325.55	300.65	8.35	5.37	1125	>sp|P02817|AMELX_BOVIN Amelogenin, X isoform OS=Bos taurus OX=9913 GN=AMELX PE=1 SV=2	1	hf1_eb_18273_82_20032023.ScanId;v=1;d1=18571.18571.3	controllerType=0 controllerNumber=1 scan=18571	44.8999
20428:2	1	S.M[+31.990]PLPPHPGHPGYIN[+0.984]F.S		M[+32], N[+1]	853.902	2	1706.8	1706.8	0	-1.6	17	Non	330.82	330.82	0	5.84	1125	>sp|P02817|AMELX_BOVIN Amelogenin, X isoform OS=Bos taurus OX=9913 GN=AMELX PE=1 SV=2	1	hf1_eb_18273_82_20032023.ScanId;v=1;d1=18010.18010.2	controllerType=0 controllerNumber=1 scan=18010	43.8604
20108:3	1	S.MP[+15.995]LPPHPGHPGYIN[+0.984]F.S		N[+1], P[+16]	564.271	3	1690.8	1690.8	0	-2.7	17	Non	341.15	341.15	4	5.13	1125	>sp|P02817|AMELX_BOVIN Amelogenin, X isoform OS=Bos taurus OX=9913 GN=AMELX PE=1 SV=2	1	hf1_eb_18273_82_20032023.ScanId;v=1;d1=17751.17751.3	controllerType=0 controllerNumber=1 scan=17751	43.3734
19363:3	1	S.MP[+15.995]LPPHPGHPGYIN[+0.984]F.S		N[+1], P[+16]	564.274	3	1690.81	1690.8	0	1.6	17	Non	356.25	356.25	4	5.34	1125	>sp|P02817|AMELX_BOVIN Amelogenin, X isoform OS=Bos taurus OX=9913 GN=AMELX PE=1 SV=2	1	hf1_eb_18273_82_20032023.ScanId;v=1;d1=17186.17186.3	controllerType=0 controllerNumber=1 scan=17186	42.3291
19110:3	1	S.MP[+15.995]LPPHPGHPGYIN[+0.984]F.S		N[+1], P[+16]	564.274	3	1690.81	1690.8	0	2.3	17	Non	365.14	365.14	4	5.28	1125	>sp|P02817|AMELX_BOVIN Amelogenin, X isoform OS=Bos taurus OX=9913 GN=AMELX PE=1 SV=2	1	hf1_eb_18273_82_20032023.ScanId;v=1;d1=16999.16999.3	controllerType=0 controllerNumber=1 scan=16999	41.9912
20825:3	1	S.MP[+15.995]LPPHPGHPGYIN[+0.984]F.S		N[+1], P[+16]	564.272	3	1690.8	1690.8	0	-1.2	17	Non	369.78	369.78	5.8	6.19	1125	>sp|P02817|AMELX_BOVIN Amelogenin, X isoform OS=Bos taurus OX=9913 GN=AMELX PE=1 SV=2	1	hf1_eb_18273_82_20032023.ScanId;v=1;d1=18299.18299.3	controllerType=0 controllerNumber=1 scan=18299	44.401
21082:3	1	S.MP[+15.995]LPPHPGHPGYIN[+0.984]F.S		N[+1], P[+16]	564.273	3	1690.8	1690.8	0	-0.5	17	Non	370.38	370.38	5.8	5.75	1125	>sp|P02817|AMELX_BOVIN Amelogenin, X isoform OS=Bos taurus OX=9913 GN=AMELX PE=1 SV=2	1	hf1_eb_18273_82_20032023.ScanId;v=1;d1=18487.18487.3	controllerType=0 controllerNumber=1 scan=18487	44.7479
18329:3	1	S.MP[+15.995]LPPHPGHPGYIN[+0.984]F.S		N[+1], P[+16]	564.273	3	1690.8	1690.8	0	-0.4	17	Non	375.84	375.84	4	6.42	1125	>sp|P02817|AMELX_BOVIN Amelogenin, X isoform OS=Bos taurus OX=9913 GN=AMELX PE=1 SV=2	1	hf1_eb_18273_82_20032023.ScanId;v=1;d1=16429.16429.3	controllerType=0 controllerNumber=1 scan=16429	40.9701
20437:3	1	S.M[+31.990]PLPPHPGHPGYIN[+0.984]F.S		M[+32], N[+1]	569.604	3	1706.8	1706.8	0	-1.3	17	Non	376.47	374.88	12.35	6.19	1125	>sp|P02817|AMELX_BOVIN Amelogenin, X isoform OS=Bos taurus OX=9913 GN=AMELX PE=1 SV=2	1	hf1_eb_18273_82_20032023.ScanId;v=1;d1=18016.18016.3	controllerType=0 controllerNumber=1 scan=18016	43.8715
19873:3	1	S.MP[+15.995]LPPHPGHPGYIN[+0.984]F.S		N[+1], P[+16]	564.273	3	1690.81	1690.8	0	0.3	17	Non	376.79	376.79	4	6.18	1125	>sp|P02817|AMELX_BOVIN Amelogenin, X isoform OS=Bos taurus OX=9913 GN=AMELX PE=1 SV=2	1	hf1_eb_18273_82_20032023.ScanId;v=1;d1=17564.17564.3	controllerType=0 controllerNumber=1 scan=17564	43.0217
20323:3	1	S.MP[+15.995]LPPHPGHPGYIN[+0.984]F.S		N[+1], P[+16]	564.271	3	1690.8	1690.8	0	-2.7	17	Non	378.54	378.54	4	6.07	1125	>sp|P02817|AMELX_BOVIN Amelogenin, X isoform OS=Bos taurus OX=9913 GN=AMELX PE=1 SV=2	1	hf1_eb_18273_82_20032023.ScanId;v=1;d1=17931.17931.3	controllerType=0 controllerNumber=1 scan=17931	43.7124
20570:3	1	S.MP[+15.995]LPPHPGHPGYIN[+0.984]F.S		N[+1], P[+16]	564.272	3	1690.8	1690.8	0	-1.7	17	Non	410.31	410.31	4	6.17	1125	>sp|P02817|AMELX_BOVIN Amelogenin, X isoform OS=Bos taurus OX=9913 GN=AMELX PE=1 SV=2	1	hf1_eb_18273_82_20032023.ScanId;v=1;d1=18112.18112.3	controllerType=0 controllerNumber=1 scan=18112	44.0545
20946:3	1	S.M[+31.990]PLPPHPGHPGYIN[+0.984]F.S		M[+32], N[+1]	569.605	3	1706.8	1706.8	0	0.3	17	Non	431.76	400.59	10.05	6.16	1125	>sp|P02817|AMELX_BOVIN Amelogenin, X isoform OS=Bos taurus OX=9913 GN=AMELX PE=1 SV=2	1	hf1_eb_18273_82_20032023.ScanId;v=1;d1=18385.18385.3	controllerType=0 controllerNumber=1 scan=18385	44.5596
18833:3	1	S.MP[+15.995]LPPHPGHPGYIN[+0.984]F.S		N[+1], P[+16]	564.274	3	1690.81	1690.8	0	1.6	17	Non	431.91	431.91	4	6.28	1125	>sp|P02817|AMELX_BOVIN Amelogenin, X isoform OS=Bos taurus OX=9913 GN=AMELX PE=1 SV=2	1	hf1_eb_18273_82_20032023.ScanId;v=1;d1=16808.16808.3	controllerType=0 controllerNumber=1 scan=16808	41.6493
18059:3	1	S.MP[+15.995]LPPHPGHPGYIN[+0.984]F.S		N[+1], P[+16]	564.271	3	1690.8	1690.8	0	-3.9	17	Non	441.3	441.3	4	5.85	1125	>sp|P02817|AMELX_BOVIN Amelogenin, X isoform OS=Bos taurus OX=9913 GN=AMELX PE=1 SV=2	1	hf1_eb_18273_82_20032023.ScanId;v=1;d1=16233.16233.3	controllerType=0 controllerNumber=1 scan=16233	40.6261
20699:2	1	S.M[+31.990]PLPPHPGHPGYIN[+0.984]F.S		M[+32], N[+1]	853.903	2	1706.8	1706.8	0	-0.5	17	Non	442.79	401.55	0	6.91	1125	>sp|P02817|AMELX_BOVIN Amelogenin, X isoform OS=Bos taurus OX=9913 GN=AMELX PE=1 SV=2	1	hf1_eb_18273_82_20032023.ScanId;v=1;d1=18208.18208.2	controllerType=0 controllerNumber=1 scan=18208	44.236
19595:3	1	S.M[+15.995]PLPPHPGHPGYIN[+0.984]F.S		M[+16], N[+1]	564.273	3	1690.8	1690.8	0	-0.4	17	Non	444.7	444.7	6.71	6.43	1125	>sp|P02817|AMELX_BOVIN Amelogenin, X isoform OS=Bos taurus OX=9913 GN=AMELX PE=1 SV=2	1	hf1_eb_18273_82_20032023.ScanId;v=1;d1=17367.17367.3	controllerType=0 controllerNumber=1 scan=17367	42.6708
20688:3	1	S.M[+31.990]PLPPHPGHPGYIN[+0.984]F.S		M[+32], N[+1]	569.604	3	1706.8	1706.8	0	-1.2	17	Non	468.61	436.27	11.04	6.43	1125	>sp|P02817|AMELX_BOVIN Amelogenin, X isoform OS=Bos taurus OX=9913 GN=AMELX PE=1 SV=2	1	hf1_eb_18273_82_20032023.ScanId;v=1;d1=18200.18200.3	controllerType=0 controllerNumber=1 scan=18200	44.2213
19337:2	1	S.M[+15.995]PLPPHPGHPGYIN[+0.984]F.S		M[+16], N[+1]	845.905	2	1690.8	1690.8	0	-0.7	17	Non	495.76	491.63	35.31	7.35	1125	>sp|P02817|AMELX_BOVIN Amelogenin, X isoform OS=Bos taurus OX=9913 GN=AMELX PE=1 SV=2	1	hf1_eb_18273_82_20032023.ScanId;v=1;d1=17164.17164.2	controllerType=0 controllerNumber=1 scan=17164	42.2868
20531:2	1	S.M[+15.995]PLPPHPGHPGYIN[+0.984]F.S		M[+16], N[+1]	845.905	2	1690.8	1690.8	0	-0.5	17	Non	511.53	450	35.07	6.82	1125	>sp|P02817|AMELX_BOVIN Amelogenin, X isoform OS=Bos taurus OX=9913 GN=AMELX PE=1 SV=2	1	hf1_eb_18273_82_20032023.ScanId;v=1;d1=18083.18083.2	controllerType=0 controllerNumber=1 scan=18083	43.9949
19567:2	1	S.M[+15.995]PLPPHPGHPGYIN[+0.984]F.S		M[+16], N[+1]	845.905	2	1690.8	1690.8	0	-1.6	17	Non	552.45	498.46	53.25	7.01	1125	>sp|P02817|AMELX_BOVIN Amelogenin, X isoform OS=Bos taurus OX=9913 GN=AMELX PE=1 SV=2	1	hf1_eb_18273_82_20032023.ScanId;v=1;d1=17343.17343.2	controllerType=0 controllerNumber=1 scan=17343	42.6226
17956:2	1	S.M[+15.995]PLPPHPGHPGYIN[+0.984]F.S		M[+16], N[+1]	845.906	2	1690.8	1690.8	0	-0.1	17	Non	595.26	553.9	72.95	7.47	1125	>sp|P02817|AMELX_BOVIN Amelogenin, X isoform OS=Bos taurus OX=9913 GN=AMELX PE=1 SV=2	1	hf1_eb_18273_82_20032023.ScanId;v=1;d1=16159.16159.2	controllerType=0 controllerNumber=1 scan=16159	40.4912
18235:2	1	S.M[+15.995]PLPPHPGHPGYIN[+0.984]F.S		M[+16], N[+1]	845.903	2	1690.8	1690.8	0	-3.3	17	Non	610.53	554.64	54.42	8.12	1125	>sp|P02817|AMELX_BOVIN Amelogenin, X isoform OS=Bos taurus OX=9913 GN=AMELX PE=1 SV=2	1	hf1_eb_18273_82_20032023.ScanId;v=1;d1=16359.16359.2	controllerType=0 controllerNumber=1 scan=16359	40.8454
20285:2	1	S.M[+15.995]PLPPHPGHPGYIN[+0.984]F.S		M[+16], N[+1]	845.904	2	1690.8	1690.8	0	-2.5	17	Non	618.96	578.98	50.3	7.89	1125	>sp|P02817|AMELX_BOVIN Amelogenin, X isoform OS=Bos taurus OX=9913 GN=AMELX PE=1 SV=2	1	hf1_eb_18273_82_20032023.ScanId;v=1;d1=17896.17896.2	controllerType=0 controllerNumber=1 scan=17896	43.6463
18794:2	1	S.M[+15.995]PLPPHPGHPGYIN[+0.984]F.S		M[+16], N[+1]	845.909	2	1690.81	1690.8	0	3.7	17	Non	627.52	566.04	49.43	7.32	1125	>sp|P02817|AMELX_BOVIN Amelogenin, X isoform OS=Bos taurus OX=9913 GN=AMELX PE=1 SV=2	1	hf1_eb_18273_82_20032023.ScanId;v=1;d1=16780.16780.2	controllerType=0 controllerNumber=1 scan=16780	41.6014
19831:2	1	S.M[+15.995]PLPPHPGHPGYIN[+0.984]F.S		M[+16], N[+1]	845.906	2	1690.8	1690.8	0	-0.4	17	Non	640.78	581.26	62.97	8.89	1125	>sp|P02817|AMELX_BOVIN Amelogenin, X isoform OS=Bos taurus OX=9913 GN=AMELX PE=1 SV=2	1	hf1_eb_18273_82_20032023.ScanId;v=1;d1=17533.17533.2	controllerType=0 controllerNumber=1 scan=17533	42.9691
19072:2	1	S.M[+15.995]PLPPHPGHPGYIN[+0.984]F.S		M[+16], N[+1]	845.906	2	1690.8	1690.8	0	0.1	17	Non	675.99	596.57	65.92	9.47	1125	>sp|P02817|AMELX_BOVIN Amelogenin, X isoform OS=Bos taurus OX=9913 GN=AMELX PE=1 SV=2	1	hf1_eb_18273_82_20032023.ScanId;v=1;d1=16973.16973.2	controllerType=0 controllerNumber=1 scan=16973	41.9445
20067:2	1	S.M[+15.995]PLPPHPGHPGYIN[+0.984]F.S		M[+16], N[+1]	845.904	2	1690.8	1690.8	0	-1.7	17	Non	700.44	619.09	80.14	10.47	1125	>sp|P02817|AMELX_BOVIN Amelogenin, X isoform OS=Bos taurus OX=9913 GN=AMELX PE=1 SV=2	1	hf1_eb_18273_82_20032023.ScanId;v=1;d1=17716.17716.2	controllerType=0 controllerNumber=1 scan=17716	43.309
18847:3	1	S.MP[+15.995]LP[+31.990]PHPGHPGYIN[+0.984]F.S		N[+1], P[+16][+32]	574.936	3	1722.79	1722.79	0	0.1	17	Non	81.2	81.2	0	0.99	1125	>sp|P02817|AMELX_BOVIN Amelogenin, X isoform OS=Bos taurus OX=9913 GN=AMELX PE=1 SV=2	1	hf1_eb_18273_82_20032023.ScanId;v=1;d1=16817.16817.3	controllerType=0 controllerNumber=1 scan=16817	41.6626
23103:2	1	S.MP[+15.995]LPPHP[+31.990]GHPGYIN[+0.984]F.S		N[+1], P[+16][+32]	861.9	2	1722.79	1722.79	0	-0.9	17	Non	172.28	170.45	4	3	1125	>sp|P02817|AMELX_BOVIN Amelogenin, X isoform OS=Bos taurus OX=9913 GN=AMELX PE=1 SV=2	1	hf1_eb_18273_82_20032023.ScanId;v=1;d1=19935.19935.2	controllerType=0 controllerNumber=1 scan=19935	47.3565
23233:2	1	S.MP[+15.995]LPPHP[+31.990]GHPGYIN[+0.984]F.S		N[+1], P[+16][+32]	861.899	2	1722.79	1722.79	0	-1.7	17	Non	182.19	182.19	4	3	1125	>sp|P02817|AMELX_BOVIN Amelogenin, X isoform OS=Bos taurus OX=9913 GN=AMELX PE=1 SV=2	1	hf1_eb_18273_82_20032023.ScanId;v=1;d1=20029.20029.2	controllerType=0 controllerNumber=1 scan=20029	47.5357
24562:2	1	S.MP[+15.995]LPPHP[+31.990]GHPGYIN[+0.984]F.S		N[+1], P[+16][+32]	861.9	2	1722.79	1722.79	0	-1	17	Non	219.95	219.95	4	3.69	1125	>sp|P02817|AMELX_BOVIN Amelogenin, X isoform OS=Bos taurus OX=9913 GN=AMELX PE=1 SV=2	1	hf1_eb_18273_82_20032023.ScanId;v=1;d1=20990.20990.2	controllerType=0 controllerNumber=1 scan=20990	49.285
24313:2	1	S.M[+15.995]PLP[+31.990]PHPGHPGYIN[+0.984]F.S		M[+16], N[+1], P[+32]	861.899	2	1722.79	1722.79	0	-1.5	17	Non	324.03	324.03	2.85	5.84	1125	>sp|P02817|AMELX_BOVIN Amelogenin, X isoform OS=Bos taurus OX=9913 GN=AMELX PE=1 SV=2	1	hf1_eb_18273_82_20032023.ScanId;v=1;d1=20802.20802.2	controllerType=0 controllerNumber=1 scan=20802	48.9432
23837:2	1	S.M[+15.995]PLPPHP[+31.990]GHPGYIN[+0.984]F.S		M[+16], N[+1], P[+32]	861.899	2	1722.79	1722.79	0	-2.2	17	Non	338.04	338.04	29.67	5.62	1125	>sp|P02817|AMELX_BOVIN Amelogenin, X isoform OS=Bos taurus OX=9913 GN=AMELX PE=1 SV=2	1	hf1_eb_18273_82_20032023.ScanId;v=1;d1=20459.20459.2	controllerType=0 controllerNumber=1 scan=20459	48.3212
23768:2	1	S.M[+15.995]PLPPHP[+31.990]GHPGYIN[+0.984]F.S		M[+16], N[+1], P[+32]	861.899	2	1722.79	1722.79	0	-2.1	17	Non	348.01	348.01	7.97	5.5	1125	>sp|P02817|AMELX_BOVIN Amelogenin, X isoform OS=Bos taurus OX=9913 GN=AMELX PE=1 SV=2	1	hf1_eb_18273_82_20032023.ScanId;v=1;d1=20415.20415.2	controllerType=0 controllerNumber=1 scan=20415	48.2442
24050:2	1	S.M[+15.995]PLPPHP[+31.990]GHPGYIN[+0.984]F.S		M[+16], N[+1], P[+32]	861.9	2	1722.79	1722.79	0	-0.5	17	Non	395.61	395.61	18.61	6.91	1125	>sp|P02817|AMELX_BOVIN Amelogenin, X isoform OS=Bos taurus OX=9913 GN=AMELX PE=1 SV=2	1	hf1_eb_18273_82_20032023.ScanId;v=1;d1=20608.20608.2	controllerType=0 controllerNumber=1 scan=20608	48.5925
23499:2	1	S.M[+15.995]PLPPHP[+31.990]GHPGYIN[+0.984]F.S		M[+16], N[+1], P[+32]	861.9	2	1722.79	1722.79	0	-1.1	17	Non	427.06	427.06	29.87	6.89	1125	>sp|P02817|AMELX_BOVIN Amelogenin, X isoform OS=Bos taurus OX=9913 GN=AMELX PE=1 SV=2	1	hf1_eb_18273_82_20032023.ScanId;v=1;d1=20218.20218.2	controllerType=0 controllerNumber=1 scan=20218	47.884
21526:3	1	S.MPLPPHPGHPGYIN[+0.984]FS.Y		N[+1]	587.952	3	1761.84	1761.84	0	-0.6	17	Non	283.46	118.23	118.23	3.46	1125	>sp|P02817|AMELX_BOVIN Amelogenin, X isoform OS=Bos taurus OX=9913 GN=AMELX PE=1 SV=2	1	hf1_eb_18273_82_20032023.ScanId;v=1;d1=18798.18798.3	controllerType=0 controllerNumber=1 scan=18798	45.3049
23937:2	1	S.MPLPPHPGHPGYIN[+0.984]FS[+79.966].Y		N[+1], S[+80]	921.408	2	1841.81	1841.81	0	0	17	Non	192.15	192.15	192.15	3.44	1125	>sp|P02817|AMELX_BOVIN Amelogenin, X isoform OS=Bos taurus OX=9913 GN=AMELX PE=1 SV=2	1	hf1_eb_18273_82_20032023.ScanId;v=1;d1=20528.20528.2	controllerType=0 controllerNumber=1 scan=20528	48.4457
19577:3	1	S.MP[+15.995]LPPHPGHPGYINFS[+79.966].Y		P[+16], S[+80]	619.607	3	1856.81	1856.82	0	-7.4	17	Non	238.86	238.86	4	2.62	1125	>sp|P02817|AMELX_BOVIN Amelogenin, X isoform OS=Bos taurus OX=9913 GN=AMELX PE=1 SV=2	1	hf1_eb_18273_82_20032023.ScanId;v=1;d1=17352.17352.3	controllerType=0 controllerNumber=1 scan=17352	42.6411
17645:3	1	S.MP[+15.995]LPPHPGHPGYIN[+0.984]FS.Y		N[+1], P[+16]	593.283	3	1777.83	1777.84	0	-1.4	17	Non	243.05	141.37	4	3.07	1125	>sp|P02817|AMELX_BOVIN Amelogenin, X isoform OS=Bos taurus OX=9913 GN=AMELX PE=1 SV=2	1	hf1_eb_18273_82_20032023.ScanId;v=1;d1=15921.15921.3	controllerType=0 controllerNumber=1 scan=15921	40.0616
24111:3	1	S.MPLPPHPGHPGYIN[+0.984]FS[+79.966].Y		N[+1], S[+80]	614.607	3	1841.81	1841.81	0	-1.2	17	Non	246.29	88.07	88.07	3.31	1125	>sp|P02817|AMELX_BOVIN Amelogenin, X isoform OS=Bos taurus OX=9913 GN=AMELX PE=1 SV=2	1	hf1_eb_18273_82_20032023.ScanId;v=1;d1=20652.20652.3	controllerType=0 controllerNumber=1 scan=20652	48.672
19083:3	1	S.MP[+15.995]LPPHPGHPGYINFS[+79.966].Y		P[+16], S[+80]	619.612	3	1856.82	1856.82	0	2.1	17	Non	254.6	254.6	4	3.44	1125	>sp|P02817|AMELX_BOVIN Amelogenin, X isoform OS=Bos taurus OX=9913 GN=AMELX PE=1 SV=2	1	hf1_eb_18273_82_20032023.ScanId;v=1;d1=16980.16980.3	controllerType=0 controllerNumber=1 scan=16980	41.9548
19848:3	1	S.MP[+15.995]LPPHPGHPGYINFS[+79.966].Y		P[+16], S[+80]	619.611	3	1856.82	1856.82	0	0.3	17	Non	257.78	257.78	4	4.56	1125	>sp|P02817|AMELX_BOVIN Amelogenin, X isoform OS=Bos taurus OX=9913 GN=AMELX PE=1 SV=2	1	hf1_eb_18273_82_20032023.ScanId;v=1;d1=17546.17546.3	controllerType=0 controllerNumber=1 scan=17546	42.99
19209:2	1	S.MP[+15.995]LPPHPGHPGYINFS[+79.966].Y		P[+16], S[+80]	928.915	2	1856.82	1856.82	0	2.6	17	Non	278.78	278.78	4	4.47	1125	>sp|P02817|AMELX_BOVIN Amelogenin, X isoform OS=Bos taurus OX=9913 GN=AMELX PE=1 SV=2	1	hf1_eb_18273_82_20032023.ScanId;v=1;d1=17066.17066.2	controllerType=0 controllerNumber=1 scan=17066	42.1063
17888:3	1	S.MP[+15.995]LPPHPGHPGYIN[+0.984]FS.Y		N[+1], P[+16]	593.282	3	1777.83	1777.84	0	-2.2	17	Non	295.83	111.76	4	3.13	1125	>sp|P02817|AMELX_BOVIN Amelogenin, X isoform OS=Bos taurus OX=9913 GN=AMELX PE=1 SV=2	1	hf1_eb_18273_82_20032023.ScanId;v=1;d1=16108.16108.3	controllerType=0 controllerNumber=1 scan=16108	40.4025
19342:3	1	S.M[+15.995]PLPPHPGHPGYINFS[+79.966].Y		M[+16], S[+80]	619.612	3	1856.82	1856.82	0	1.7	17	Non	329.27	329.27	6.12	5.47	1125	>sp|P02817|AMELX_BOVIN Amelogenin, X isoform OS=Bos taurus OX=9913 GN=AMELX PE=1 SV=2	1	hf1_eb_18273_82_20032023.ScanId;v=1;d1=17169.17169.3	controllerType=0 controllerNumber=1 scan=17169	42.2959
19457:2	1	S.M[+15.995]PLPPHPGHPGYINFS[+79.966].Y		M[+16], S[+80]	928.911	2	1856.81	1856.82	0	-2.6	17	Non	331.69	331.69	5.05	5.62	1125	>sp|P02817|AMELX_BOVIN Amelogenin, X isoform OS=Bos taurus OX=9913 GN=AMELX PE=1 SV=2	1	hf1_eb_18273_82_20032023.ScanId;v=1;d1=17259.17259.2	controllerType=0 controllerNumber=1 scan=17259	42.4667
24448:2	1	S.MPLPPHPGHPGYIN[+0.984]FS[+79.966].Y		N[+1], S[+80]	921.408	2	1841.81	1841.81	0	0.4	17	Non	441.47	355.79	253.42	5.98	1125	>sp|P02817|AMELX_BOVIN Amelogenin, X isoform OS=Bos taurus OX=9913 GN=AMELX PE=1 SV=2	1	hf1_eb_18273_82_20032023.ScanId;v=1;d1=20905.20905.2	controllerType=0 controllerNumber=1 scan=20905	49.1328
24203:2	1	S.MPLPPHPGHPGYIN[+0.984]FS[+79.966].Y		N[+1], S[+80]	921.406	2	1841.81	1841.81	0	-1.5	17	Non	538.1	538.1	248.65	7.43	1125	>sp|P02817|AMELX_BOVIN Amelogenin, X isoform OS=Bos taurus OX=9913 GN=AMELX PE=1 SV=2	1	hf1_eb_18273_82_20032023.ScanId;v=1;d1=20718.20718.2	controllerType=0 controllerNumber=1 scan=20718	48.7899
21630:2	1	S.MP[+15.995]LPPHPGHPGYIN[+0.984]FS[+79.966].Y		N[+1], P[+16], S[+80]	929.407	2	1857.81	1857.8	0	2	17	Non	302.37	302.37	4	4.62	1125	>sp|P02817|AMELX_BOVIN Amelogenin, X isoform OS=Bos taurus OX=9913 GN=AMELX PE=1 SV=2	1	hf1_eb_18273_82_20032023.ScanId;v=1;d1=18878.18878.2	controllerType=0 controllerNumber=1 scan=18878	45.4566
20058:2	1	S.M[+15.995]PLPPHPGHPGYIN[+0.984]FS[+79.966].Y		M[+16], N[+1], S[+80]	929.404	2	1857.8	1857.8	0	-1.3	17	Non	336.86	257.46	6.25	5.61	1125	>sp|P02817|AMELX_BOVIN Amelogenin, X isoform OS=Bos taurus OX=9913 GN=AMELX PE=1 SV=2	1	hf1_eb_18273_82_20032023.ScanId;v=1;d1=17708.17708.2	controllerType=0 controllerNumber=1 scan=17708	43.2888
21358:2	1	S.M[+15.995]PLPPHPGHPGYIN[+0.984]FS[+79.966].Y		M[+16], N[+1], S[+80]	929.406	2	1857.8	1857.8	0	0.6	17	Non	431.2	409.58	21.5	7.29	1125	>sp|P02817|AMELX_BOVIN Amelogenin, X isoform OS=Bos taurus OX=9913 GN=AMELX PE=1 SV=2	1	hf1_eb_18273_82_20032023.ScanId;v=1;d1=18686.18686.2	controllerType=0 controllerNumber=1 scan=18686	45.1068
20719:3	1	S.MP[+15.995]LPPHPGHPGYIN[+0.984]FS[+79.966].Y		N[+1], P[+16], S[+80]	619.939	3	1857.8	1857.8	0	-0.5	17	Non	442.02	416.87	4	6.43	1125	>sp|P02817|AMELX_BOVIN Amelogenin, X isoform OS=Bos taurus OX=9913 GN=AMELX PE=1 SV=2	1	hf1_eb_18273_82_20032023.ScanId;v=1;d1=18226.18226.3	controllerType=0 controllerNumber=1 scan=18226	44.2699
20291:3	1	S.M[+15.995]PLPPHPGHPGYIN[+0.984]FS[+79.966].Y		M[+16], N[+1], S[+80]	619.938	3	1857.8	1857.8	0	-1.5	17	Non	453.18	354.07	3.03	5.74	1125	>sp|P02817|AMELX_BOVIN Amelogenin, X isoform OS=Bos taurus OX=9913 GN=AMELX PE=1 SV=2	1	hf1_eb_18273_82_20032023.ScanId;v=1;d1=17900.17900.3	controllerType=0 controllerNumber=1 scan=17900	43.6522
20993:3	1	S.MP[+15.995]LPPHPGHPGYIN[+0.984]FS[+79.966].Y		N[+1], P[+16], S[+80]	619.939	3	1857.8	1857.8	0	0.3	17	Non	488.15	412.07	4	6.85	1125	>sp|P02817|AMELX_BOVIN Amelogenin, X isoform OS=Bos taurus OX=9913 GN=AMELX PE=1 SV=2	1	hf1_eb_18273_82_20032023.ScanId;v=1;d1=18421.18421.3	controllerType=0 controllerNumber=1 scan=18421	44.6284
20320:2	1	S.M[+15.995]PLPPHPGHPGYIN[+0.984]FS[+79.966].Y		M[+16], N[+1], S[+80]	929.404	2	1857.8	1857.8	0	-1.4	17	Non	500.35	299.22	36.51	6.55	1125	>sp|P02817|AMELX_BOVIN Amelogenin, X isoform OS=Bos taurus OX=9913 GN=AMELX PE=1 SV=2	1	hf1_eb_18273_82_20032023.ScanId;v=1;d1=17928.17928.2	controllerType=0 controllerNumber=1 scan=17928	43.7052
20571:2	1	S.M[+15.995]PLPPHPGHPGYIN[+0.984]FS[+79.966].Y		M[+16], N[+1], S[+80]	929.405	2	1857.8	1857.8	0	-0.1	17	Non	521.01	507.63	23.48	7.43	1125	>sp|P02817|AMELX_BOVIN Amelogenin, X isoform OS=Bos taurus OX=9913 GN=AMELX PE=1 SV=2	1	hf1_eb_18273_82_20032023.ScanId;v=1;d1=18113.18113.2	controllerType=0 controllerNumber=1 scan=18113	44.056
21084:2	1	S.M[+15.995]PLPPHPGHPGYIN[+0.984]FS[+79.966].Y		M[+16], N[+1], S[+80]	929.406	2	1857.81	1857.8	0	1.3	17	Non	532.14	458.5	30.51	7.42	1125	>sp|P02817|AMELX_BOVIN Amelogenin, X isoform OS=Bos taurus OX=9913 GN=AMELX PE=1 SV=2	1	hf1_eb_18273_82_20032023.ScanId;v=1;d1=18488.18488.2	controllerType=0 controllerNumber=1 scan=18488	44.7494
20826:2	1	S.M[+15.995]PLPPHPGHPGYIN[+0.984]FS[+79.966].Y		M[+16], N[+1], S[+80]	929.405	2	1857.8	1857.8	0	0.3	17	Non	547.84	458.75	32.06	7.42	1125	>sp|P02817|AMELX_BOVIN Amelogenin, X isoform OS=Bos taurus OX=9913 GN=AMELX PE=1 SV=2	1	hf1_eb_18273_82_20032023.ScanId;v=1;d1=18300.18300.2	controllerType=0 controllerNumber=1 scan=18300	44.4025
21229:3	1	S.MP[+15.995]LPPHPGHPGYIN[+0.984]FSY.E		N[+1], P[+16]	647.637	3	1940.9	1940.9	0	-1.2	17	Non	110	110	7.3	1.46	1125	>sp|P02817|AMELX_BOVIN Amelogenin, X isoform OS=Bos taurus OX=9913 GN=AMELX PE=1 SV=2	1	hf1_eb_18273_82_20032023.ScanId;v=1;d1=18593.18593.3	controllerType=0 controllerNumber=1 scan=18593	44.9404
24087:3	1	S.MP[+15.995]LPPHPGHPGYIN[+0.984]FS[+79.966]Y.E		N[+1], P[+16], S[+80]	674.292	3	2020.86	2020.87	0	-1.9	17	Non	101.22	101.22	4	1.19	1125	>sp|P02817|AMELX_BOVIN Amelogenin, X isoform OS=Bos taurus OX=9913 GN=AMELX PE=1 SV=2	1	hf1_eb_18273_82_20032023.ScanId;v=1;d1=20635.20635.3	controllerType=0 controllerNumber=1 scan=20635	48.6413
23813:3	1	S.MP[+15.995]LPPHPGHPGYIN[+0.984]FS[+79.966]Y.E		N[+1], P[+16], S[+80]	674.293	3	2020.86	2020.87	0	-0.7	17	Non	133.79	127.33	5.8	1.85	1125	>sp|P02817|AMELX_BOVIN Amelogenin, X isoform OS=Bos taurus OX=9913 GN=AMELX PE=1 SV=2	1	hf1_eb_18273_82_20032023.ScanId;v=1;d1=20443.20443.3	controllerType=0 controllerNumber=1 scan=20443	48.2945
22807:3	1	S.M[+15.995]PLPPHPGHPGYIN[+0.984]FS[+79.966]YE.V		M[+16], N[+1], S[+80]	717.307	3	2149.91	2149.91	0	-0.7	17	Non	121.9	121.9	5.48	1.85	1125	>sp|P02817|AMELX_BOVIN Amelogenin, X isoform OS=Bos taurus OX=9913 GN=AMELX PE=1 SV=2	1	hf1_eb_18273_82_20032023.ScanId;v=1;d1=19731.19731.3	controllerType=0 controllerNumber=1 scan=19731	46.9858
33480:3	1	S.MP[+15.995]LPPHPGHPGYINFS[+79.966]YEVLTPL.K		P[+16], S[+80]	891.421	3	2672.25	2672.26	0	-4.7	17	Non	108.07	108.07	4	1.22	1125	>sp|P02817|AMELX_BOVIN Amelogenin, X isoform OS=Bos taurus OX=9913 GN=AMELX PE=1 SV=2	1	hf1_eb_18273_82_20032023.ScanId;v=1;d1=27231.27231.3	controllerType=0 controllerNumber=1 scan=27231	60.6466
34247:3	1	S.MP[+15.995]LPPHPGHPGYIN[+0.984]FS[+79.966]YEVLTPL.K		N[+1], P[+16], S[+80]	891.755	3	2673.25	2673.25	0	1.9	17	Non	33.2	33.2	4	1.28	1125	>sp|P02817|AMELX_BOVIN Amelogenin, X isoform OS=Bos taurus OX=9913 GN=AMELX PE=1 SV=2	1	hf1_eb_18273_82_20032023.ScanId;v=1;d1=27771.27771.3	controllerType=0 controllerNumber=1 scan=27771	61.6718
34005:3	1	S.MP[+15.995]LPPHPGHPGYIN[+0.984]FS[+79.966]YEVLTPL.K		N[+1], P[+16], S[+80]	891.755	3	2673.25	2673.25	0	1.9	17	Non	85.91	85.91	4	2.14	1125	>sp|P02817|AMELX_BOVIN Amelogenin, X isoform OS=Bos taurus OX=9913 GN=AMELX PE=1 SV=2	1	hf1_eb_18273_82_20032023.ScanId;v=1;d1=27597.27597.3	controllerType=0 controllerNumber=1 scan=27597	61.331
33212:3	1	S.MP[+15.995]LPPHPGHPGYIN[+0.984]FS[+79.966]YEVLTPL.K		N[+1], P[+16], S[+80]	891.757	3	2673.26	2673.25	0	3.8	17	Non	126.05	126.05	4	1.09	1125	>sp|P02817|AMELX_BOVIN Amelogenin, X isoform OS=Bos taurus OX=9913 GN=AMELX PE=1 SV=2	1	hf1_eb_18273_82_20032023.ScanId;v=1;d1=27039.27039.3	controllerType=0 controllerNumber=1 scan=27039	60.2883
33211:3	1	S.MP[+15.995]LPPHPGHP[+31.990]GYINF[+31.990]SY[+15.995]EVLTPL.K		F[+32], P[+16][+32], Y[+16]	891.424	3	2672.26	2672.27	0	-4.4	17	Non	124.8	124.8	0	1.48	1125	>sp|P02817|AMELX_BOVIN Amelogenin, X isoform OS=Bos taurus OX=9913 GN=AMELX PE=1 SV=2	1	hf1_eb_18273_82_20032023.ScanId;v=1;d1=27039.27039.3	controllerType=0 controllerNumber=1 scan=27039	60.2883
30710:3	1	S.MPLPPHPGHPGYINFS[+79.966]YEVLTPLK.W		S[+80]	928.786	3	2784.34	2784.36	0	-6.3	17	NRagged	176.25	176.25	1.04	2.95	1125	>sp|P02817|AMELX_BOVIN Amelogenin, X isoform OS=Bos taurus OX=9913 GN=AMELX PE=1 SV=2	1	hf1_eb_18273_82_20032023.ScanId;v=1;d1=25308.25308.3	controllerType=0 controllerNumber=1 scan=25308	57.0988
28768:4	1	S.MP[+15.995]LPPHPGHPGYINFS[+79.966]YEVLTPLK.W		P[+16], S[+80]	700.843	4	2800.35	2800.36	0	-1.8	17	NRagged	112.81	112.81	4	2.49	1125	>sp|P02817|AMELX_BOVIN Amelogenin, X isoform OS=Bos taurus OX=9913 GN=AMELX PE=1 SV=2	1	hf1_eb_18273_82_20032023.ScanId;v=1;d1=23918.23918.3	controllerType=0 controllerNumber=1 scan=23918	54.575
28286:3	1	S.M[+15.995]PLPPHPGHPGYINFS[+79.966]YEVLTPLK.W		M[+16], S[+80]	934.118	3	2800.34	2800.36	0	-6.5	17	NRagged	161.2	161.2	5.78	3.35	1125	>sp|P02817|AMELX_BOVIN Amelogenin, X isoform OS=Bos taurus OX=9913 GN=AMELX PE=1 SV=2	1	hf1_eb_18273_82_20032023.ScanId;v=1;d1=23589.23589.3	controllerType=0 controllerNumber=1 scan=23589	53.9939
28709:4	1	S.MP[+15.995]LPPHPGHPGYINFS[+79.966]YEVLTPLK.W		P[+16], S[+80]	700.843	4	2800.35	2800.36	0	-2.1	17	NRagged	242.57	242.57	4	5.5	1125	>sp|P02817|AMELX_BOVIN Amelogenin, X isoform OS=Bos taurus OX=9913 GN=AMELX PE=1 SV=2	1	hf1_eb_18273_82_20032023.ScanId;v=1;d1=23877.23877.4	controllerType=0 controllerNumber=1 scan=23877	54.4996
31314:3	1	S.MPLPPHPGHPGYIN[+0.984]FS[+79.966]YEVLTPLK.W		N[+1], S[+80]	929.121	3	2785.35	2785.35	0	1.5	17	NRagged	247.87	247.87	76.76	6.43	1125	>sp|P02817|AMELX_BOVIN Amelogenin, X isoform OS=Bos taurus OX=9913 GN=AMELX PE=1 SV=2	1	hf1_eb_18273_82_20032023.ScanId;v=1;d1=25715.25715.3	controllerType=0 controllerNumber=1 scan=25715	57.8307
30711:3	1	S.MPLPPHPGHPGYIN[+0.984]FS[+79.966]YEVLTPLK.W		N[+1], S[+80]	929.119	3	2785.34	2785.35	0	-0.9	17	NRagged	273.76	273.76	92.29	6.34	1125	>sp|P02817|AMELX_BOVIN Amelogenin, X isoform OS=Bos taurus OX=9913 GN=AMELX PE=1 SV=2	1	hf1_eb_18273_82_20032023.ScanId;v=1;d1=25308.25308.3	controllerType=0 controllerNumber=1 scan=25308	57.0988
28875:3	1	S.M[+15.995]PLPPHPGHPGYINFS[+79.966]YEVLTPLK.W		M[+16], S[+80]	934.123	3	2800.35	2800.36	0	-1.2	17	NRagged	677.27	677.27	28.29	10.61	1125	>sp|P02817|AMELX_BOVIN Amelogenin, X isoform OS=Bos taurus OX=9913 GN=AMELX PE=1 SV=2	1	hf1_eb_18273_82_20032023.ScanId;v=1;d1=23990.23990.3	controllerType=0 controllerNumber=1 scan=23990	54.7016
28598:3	1	S.M[+15.995]PLPPHPGHPGYINFS[+79.966]YEVLTPLK.W		M[+16], S[+80]	934.123	3	2800.36	2800.36	0	-0.6	17	NRagged	969.35	969.35	50.34	16.61	1125	>sp|P02817|AMELX_BOVIN Amelogenin, X isoform OS=Bos taurus OX=9913 GN=AMELX PE=1 SV=2	1	hf1_eb_18273_82_20032023.ScanId;v=1;d1=23795.23795.3	controllerType=0 controllerNumber=1 scan=23795	54.3543
29224:4	1	S.MP[+15.995]LPPHPGHPGYIN[+0.984]FS[+79.966]YEVLTPLK.W		N[+1], P[+16], S[+80]	701.091	4	2801.34	2801.34	0	0.9	17	NRagged	12.67	12.67	4	1.22	1125	>sp|P02817|AMELX_BOVIN Amelogenin, X isoform OS=Bos taurus OX=9913 GN=AMELX PE=1 SV=2	1	hf1_eb_18273_82_20032023.ScanId;v=1;d1=24232.24232.4	controllerType=0 controllerNumber=1 scan=24232	55.1361
30438:3	1	S.MPLPPHPGHP[+15.995]GY[+31.990]INF[+31.990]SYEVLTPLK.W		F[+32], P[+16], Y[+32]	928.79	3	2784.35	2784.37	0	-5.7	17	NRagged	40.11	40.11	0	1.25	1125	>sp|P02817|AMELX_BOVIN Amelogenin, X isoform OS=Bos taurus OX=9913 GN=AMELX PE=1 SV=2	1	hf1_eb_18273_82_20032023.ScanId;v=1;d1=25110.25110.3	controllerType=0 controllerNumber=1 scan=25110	56.7357
28287:3	1	S.M[+15.995]PLPPHPGHPGYIN[+0.984]FS[+79.966]YEVLTPLK.W		M[+16], N[+1], S[+80]	934.451	3	2801.34	2801.34	0	-0.6	17	NRagged	259.13	259.13	13.01	6.86	1125	>sp|P02817|AMELX_BOVIN Amelogenin, X isoform OS=Bos taurus OX=9913 GN=AMELX PE=1 SV=2	1	hf1_eb_18273_82_20032023.ScanId;v=1;d1=23589.23589.3	controllerType=0 controllerNumber=1 scan=23589	53.9939
29489:4	1	S.MP[+15.995]LPPHPGHPGYIN[+0.984]FS[+79.966]YEVLTPLK.W		N[+1], P[+16], S[+80]	701.09	4	2801.34	2801.34	0	-1	17	NRagged	294.13	294.13	4	6.01	1125	>sp|P02817|AMELX_BOVIN Amelogenin, X isoform OS=Bos taurus OX=9913 GN=AMELX PE=1 SV=2	1	hf1_eb_18273_82_20032023.ScanId;v=1;d1=24422.24422.4	controllerType=0 controllerNumber=1 scan=24422	55.4892
29156:3	1	S.M[+15.995]PLPPHPGHPGYIN[+0.984]FS[+79.966]YEVLTPLK.W		M[+16], N[+1], S[+80]	934.454	3	2801.35	2801.34	0	2.5	17	NRagged	462.2	462.2	18.9	6.91	1125	>sp|P02817|AMELX_BOVIN Amelogenin, X isoform OS=Bos taurus OX=9913 GN=AMELX PE=1 SV=2	1	hf1_eb_18273_82_20032023.ScanId;v=1;d1=24183.24183.3	controllerType=0 controllerNumber=1 scan=24183	55.0458
29673:3	1	S.MP[+15.995]LPPHPGHPGYIN[+0.984]FS[+79.966]YEVLTPLK.W		N[+1], P[+16], S[+80]	934.453	3	2801.34	2801.34	0	1.1	17	NRagged	488.13	488.13	4	8.06	1125	>sp|P02817|AMELX_BOVIN Amelogenin, X isoform OS=Bos taurus OX=9913 GN=AMELX PE=1 SV=2	1	hf1_eb_18273_82_20032023.ScanId;v=1;d1=24556.24556.3	controllerType=0 controllerNumber=1 scan=24556	55.7319
29406:3	1	S.M[+15.995]PLPPHPGHPGYIN[+0.984]FS[+79.966]YEVLTPLK.W		M[+16], N[+1], S[+80]	934.45	3	2801.34	2801.34	0	-1.6	17	NRagged	1014.75	1013.34	36.28	17.61	1125	>sp|P02817|AMELX_BOVIN Amelogenin, X isoform OS=Bos taurus OX=9913 GN=AMELX PE=1 SV=2	1	hf1_eb_18273_82_20032023.ScanId;v=1;d1=24364.24364.3	controllerType=0 controllerNumber=1 scan=24364	55.3828
11468:1	1	M.PLPP.H			423.26	1	423.26	423.26	0	-1.2	18	Non	168.72	105.52	105.52	0.35	1125	>sp|P02817|AMELX_BOVIN Amelogenin, X isoform OS=Bos taurus OX=9913 GN=AMELX PE=1 SV=2	1	hf1_eb_18273_82_20032023.ScanId;v=1;d1=11371.11371.3	controllerType=0 controllerNumber=1 scan=11371	31.7419
03918:2	1	M.PLP[+15.995]P[+31.990]HPG.H		P[+16][+32]	381.692	2	762.377	762.378	0	-1.3	18	Non	92.35	92.35	0	0.32	1125	>sp|P02817|AMELX_BOVIN Amelogenin, X isoform OS=Bos taurus OX=9913 GN=AMELX PE=1 SV=2	1	hf1_eb_18273_82_20032023.ScanId;v=1;d1=5313.5313.2	controllerType=0 controllerNumber=1 scan=5313	19.4877
03706:2	1	M.PLP[+15.995]P[+31.990]HPG.H		P[+16][+32]	381.692	2	762.377	762.378	0	-1.9	18	Non	108.75	108.75	0	0.32	1125	>sp|P02817|AMELX_BOVIN Amelogenin, X isoform OS=Bos taurus OX=9913 GN=AMELX PE=1 SV=2	1	hf1_eb_18273_82_20032023.ScanId;v=1;d1=5141.5141.2	controllerType=0 controllerNumber=1 scan=5141	19.1475
04195:2	1	M.P[+31.990]LP[+31.990]PHPG.H		P[+32]*2	389.691	2	778.375	778.373	0	2.2	18	Non	170.31	170.31	49.08	0.59	1125	>sp|P02817|AMELX_BOVIN Amelogenin, X isoform OS=Bos taurus OX=9913 GN=AMELX PE=1 SV=2	1	hf1_eb_18273_82_20032023.ScanId;v=1;d1=5560.5560.2	controllerType=0 controllerNumber=1 scan=5560	20.0716
08503:2	1	M.PLPPHPGH.P			426.23	2	851.452	851.452	0	-0.5	18	Non	253.57	82.7	82.7	2.73	1125	>sp|P02817|AMELX_BOVIN Amelogenin, X isoform OS=Bos taurus OX=9913 GN=AMELX PE=1 SV=2	1	hf1_eb_18273_82_20032023.ScanId;v=1;d1=9085.9085.2	controllerType=0 controllerNumber=1 scan=9085	27.3709
04992:2	1	M.PLPPHPGHP.G			474.756	2	948.505	948.505	0	-0.4	18	Non	324.89	213.73	213.73	4.35	1125	>sp|P02817|AMELX_BOVIN Amelogenin, X isoform OS=Bos taurus OX=9913 GN=AMELX PE=1 SV=2	1	hf1_eb_18273_82_20032023.ScanId;v=1;d1=6212.6212.2	controllerType=0 controllerNumber=1 scan=6212	21.4244
05742:2	1	M.PLPPHPGHP.G			474.756	2	948.504	948.505	0	-0.7	18	Non	362.32	209.89	209.89	4.93	1125	>sp|P02817|AMELX_BOVIN Amelogenin, X isoform OS=Bos taurus OX=9913 GN=AMELX PE=1 SV=2	1	hf1_eb_18273_82_20032023.ScanId;v=1;d1=6851.6851.2	controllerType=0 controllerNumber=1 scan=6851	22.7749
07224:2	1	M.PLPPHPGHP.G			474.756	2	948.504	948.505	0	-0.9	18	Non	401.11	281.04	281.04	5.2	1125	>sp|P02817|AMELX_BOVIN Amelogenin, X isoform OS=Bos taurus OX=9913 GN=AMELX PE=1 SV=2	1	hf1_eb_18273_82_20032023.ScanId;v=1;d1=8066.8066.2	controllerType=0 controllerNumber=1 scan=8066	25.3049
05560:2	1	M.PLPPHPGHP.G			474.756	2	948.504	948.505	0	-1.1	18	Non	421.72	218.29	218.29	4.91	1125	>sp|P02817|AMELX_BOVIN Amelogenin, X isoform OS=Bos taurus OX=9913 GN=AMELX PE=1 SV=2	1	hf1_eb_18273_82_20032023.ScanId;v=1;d1=6694.6694.2	controllerType=0 controllerNumber=1 scan=6694	22.4531
05364:2	1	M.PLPPHPGHP.G			474.756	2	948.504	948.505	0	-0.9	18	Non	502	232.73	232.73	5.6	1125	>sp|P02817|AMELX_BOVIN Amelogenin, X isoform OS=Bos taurus OX=9913 GN=AMELX PE=1 SV=2	1	hf1_eb_18273_82_20032023.ScanId;v=1;d1=6532.6532.2	controllerType=0 controllerNumber=1 scan=6532	22.1125
05168:2	1	M.PLPPHPGHP.G			474.756	2	948.504	948.505	0	-1.1	18	Non	511.99	294.12	294.12	5.88	1125	>sp|P02817|AMELX_BOVIN Amelogenin, X isoform OS=Bos taurus OX=9913 GN=AMELX PE=1 SV=2	1	hf1_eb_18273_82_20032023.ScanId;v=1;d1=6366.6366.2	controllerType=0 controllerNumber=1 scan=6366	21.77
07510:2	1	M.PLPPHPGHPGY.I			584.799	2	1168.59	1168.59	0	0.1	18	Non	298.52	232.72	232.72	4.63	1125	>sp|P02817|AMELX_BOVIN Amelogenin, X isoform OS=Bos taurus OX=9913 GN=AMELX PE=1 SV=2	1	hf1_eb_18273_82_20032023.ScanId;v=1;d1=8293.8293.2	controllerType=0 controllerNumber=1 scan=8293	25.7824
07440:2	1	M.PLPPHPGHPGY.I			584.798	2	1168.59	1168.59	0	-0.1	18	Non	375.7	287.54	287.54	5.02	1125	>sp|P02817|AMELX_BOVIN Amelogenin, X isoform OS=Bos taurus OX=9913 GN=AMELX PE=1 SV=2	1	hf1_eb_18273_82_20032023.ScanId;v=1;d1=8237.8237.2	controllerType=0 controllerNumber=1 scan=8237	25.6756
12216:3	1	M.PLPPHPGHPGYI.N			427.895	3	1281.67	1281.67	0	-2.1	18	Non	285.8	253.34	253.34	4.51	1125	>sp|P02817|AMELX_BOVIN Amelogenin, X isoform OS=Bos taurus OX=9913 GN=AMELX PE=1 SV=2	1	hf1_eb_18273_82_20032023.ScanId;v=1;d1=11929.11929.3	controllerType=0 controllerNumber=1 scan=11929	32.8003
11758:3	1	M.PLPPHPGHPGYI.N			427.896	3	1281.67	1281.67	0	-0.8	18	Non	326.84	221.58	221.58	4.66	1125	>sp|P02817|AMELX_BOVIN Amelogenin, X isoform OS=Bos taurus OX=9913 GN=AMELX PE=1 SV=2	1	hf1_eb_18273_82_20032023.ScanId;v=1;d1=11584.11584.3	controllerType=0 controllerNumber=1 scan=11584	32.1356
12156:3	1	M.PLPPHPGHPGYI.N			427.895	3	1281.67	1281.67	0	-2.2	18	Non	390.93	309.47	309.47	4.74	1125	>sp|P02817|AMELX_BOVIN Amelogenin, X isoform OS=Bos taurus OX=9913 GN=AMELX PE=1 SV=2	1	hf1_eb_18273_82_20032023.ScanId;v=1;d1=11884.11884.3	controllerType=0 controllerNumber=1 scan=11884	32.7193
09833:3	1	M.PLPPHPGHPGYIN.F			465.91	3	1395.72	1395.72	0	-1	18	Non	268.05	253.56	253.56	4.33	1125	>sp|P02817|AMELX_BOVIN Amelogenin, X isoform OS=Bos taurus OX=9913 GN=AMELX PE=1 SV=2	1	hf1_eb_18273_82_20032023.ScanId;v=1;d1=10124.10124.3	controllerType=0 controllerNumber=1 scan=10124	29.4001
13050:3	1	M.PLPPHPGHPGYIN[+0.984].F		N[+1]	466.238	3	1396.7	1396.7	0	-0.5	18	Non	158.39	158.39	158.39	2.12	1125	>sp|P02817|AMELX_BOVIN Amelogenin, X isoform OS=Bos taurus OX=9913 GN=AMELX PE=1 SV=2	1	hf1_eb_18273_82_20032023.ScanId;v=1;d1=12543.12543.2	controllerType=0 controllerNumber=1 scan=12543	33.9384
11398:2	1	M.PLPPHPGHPGYIN[+0.984].F		N[+1]	698.853	2	1396.7	1396.7	0	-1.2	18	Non	298.17	281.74	281.74	5.64	1125	>sp|P02817|AMELX_BOVIN Amelogenin, X isoform OS=Bos taurus OX=9913 GN=AMELX PE=1 SV=2	1	hf1_eb_18273_82_20032023.ScanId;v=1;d1=11319.11319.2	controllerType=0 controllerNumber=1 scan=11319	31.6447
12630:3	1	M.PLPPHPGHPGYIN[+0.984].F		N[+1]	466.238	3	1396.7	1396.7	0	-0.3	18	Non	319.6	256.52	256.52	5.04	1125	>sp|P02817|AMELX_BOVIN Amelogenin, X isoform OS=Bos taurus OX=9913 GN=AMELX PE=1 SV=2	1	hf1_eb_18273_82_20032023.ScanId;v=1;d1=12241.12241.3	controllerType=0 controllerNumber=1 scan=12241	33.3912
11150:2	1	M.PLPPHPGHPGYIN[+0.984].F		N[+1]	698.853	2	1396.7	1396.7	0	-0.9	18	Non	398.46	297.46	297.46	5.63	1125	>sp|P02817|AMELX_BOVIN Amelogenin, X isoform OS=Bos taurus OX=9913 GN=AMELX PE=1 SV=2	1	hf1_eb_18273_82_20032023.ScanId;v=1;d1=11129.11129.2	controllerType=0 controllerNumber=1 scan=11129	31.2974
12902:3	1	M.PLPPHPGHPGYIN[+0.984].F		N[+1]	466.238	3	1396.7	1396.7	0	-0.6	18	Non	403.18	380.78	380.78	6.16	1125	>sp|P02817|AMELX_BOVIN Amelogenin, X isoform OS=Bos taurus OX=9913 GN=AMELX PE=1 SV=2	1	hf1_eb_18273_82_20032023.ScanId;v=1;d1=12437.12437.3	controllerType=0 controllerNumber=1 scan=12437	33.7479
10906:2	1	M.PLPPHPGHPGYIN[+0.984].F		N[+1]	698.853	2	1396.7	1396.7	0	-1.1	18	Non	412.24	320.51	320.51	6.37	1125	>sp|P02817|AMELX_BOVIN Amelogenin, X isoform OS=Bos taurus OX=9913 GN=AMELX PE=1 SV=2	1	hf1_eb_18273_82_20032023.ScanId;v=1;d1=10945.10945.2	controllerType=0 controllerNumber=1 scan=10945	30.9523
11588:3	1	M.PLPPHPGHPGYIN[+0.984].F		N[+1]	466.238	3	1396.7	1396.7	0	-1.7	18	Non	453.22	397.13	397.13	5.95	1125	>sp|P02817|AMELX_BOVIN Amelogenin, X isoform OS=Bos taurus OX=9913 GN=AMELX PE=1 SV=2	1	hf1_eb_18273_82_20032023.ScanId;v=1;d1=11459.11459.3	controllerType=0 controllerNumber=1 scan=11459	31.905
11083:3	1	M.PLPPHPGHPGYIN[+0.984].F		N[+1]	466.238	3	1396.7	1396.7	0	-0.7	18	Non	476.78	476.78	476.78	6.6	1125	>sp|P02817|AMELX_BOVIN Amelogenin, X isoform OS=Bos taurus OX=9913 GN=AMELX PE=1 SV=2	1	hf1_eb_18273_82_20032023.ScanId;v=1;d1=11079.11079.3	controllerType=0 controllerNumber=1 scan=11079	31.2052
10830:3	1	M.PLPPHPGHPGYIN[+0.984].F		N[+1]	466.239	3	1396.7	1396.7	0	0.4	18	Non	483.39	473.52	473.52	6.6	1125	>sp|P02817|AMELX_BOVIN Amelogenin, X isoform OS=Bos taurus OX=9913 GN=AMELX PE=1 SV=2	1	hf1_eb_18273_82_20032023.ScanId;v=1;d1=10891.10891.3	controllerType=0 controllerNumber=1 scan=10891	30.856
11333:3	1	M.PLPPHPGHPGYIN[+0.984].F		N[+1]	466.238	3	1396.7	1396.7	0	-0.5	18	Non	499.58	455.23	455.23	6.2	1125	>sp|P02817|AMELX_BOVIN Amelogenin, X isoform OS=Bos taurus OX=9913 GN=AMELX PE=1 SV=2	1	hf1_eb_18273_82_20032023.ScanId;v=1;d1=11267.11267.3	controllerType=0 controllerNumber=1 scan=11267	31.5474
17491:3	1	M.PLPPHPGHPGYINF.S			514.933	3	1542.78	1542.79	0	-0.8	18	Non	71.73	71.73	71.73	0.79	1125	>sp|P02817|AMELX_BOVIN Amelogenin, X isoform OS=Bos taurus OX=9913 GN=AMELX PE=1 SV=2	1	hf1_eb_18273_82_20032023.ScanId;v=1;d1=15804.15804.3	controllerType=0 controllerNumber=1 scan=15804	39.8551
20420:3	1	M.PLPPHPGHPGYINF.S			514.933	3	1542.78	1542.79	0	-0.9	18	Non	180.55	165.88	165.88	2.42	1125	>sp|P02817|AMELX_BOVIN Amelogenin, X isoform OS=Bos taurus OX=9913 GN=AMELX PE=1 SV=2	1	hf1_eb_18273_82_20032023.ScanId;v=1;d1=18005.18005.3	controllerType=0 controllerNumber=1 scan=18005	43.8529
22293:3	1	M.PLPPHPGHPGYIN[+0.984]F.S		N[+1]	515.261	3	1543.77	1543.77	0	-1.2	18	Non	55.1	55.1	55.1	0.34	1125	>sp|P02817|AMELX_BOVIN Amelogenin, X isoform OS=Bos taurus OX=9913 GN=AMELX PE=1 SV=2	1	hf1_eb_18273_82_20032023.ScanId;v=1;d1=19364.19364.3	controllerType=0 controllerNumber=1 scan=19364	46.3111
21895:3	1	M.PLPPHPGHPGYIN[+0.984]F.S		N[+1]	515.261	3	1543.77	1543.77	0	0.1	18	Non	205.43	194.46	194.46	2.41	1125	>sp|P02817|AMELX_BOVIN Amelogenin, X isoform OS=Bos taurus OX=9913 GN=AMELX PE=1 SV=2	1	hf1_eb_18273_82_20032023.ScanId;v=1;d1=19075.19075.3	controllerType=0 controllerNumber=1 scan=19075	45.8049
19401:3	1	M.PLPPHPGHPGYIN[+0.984]F.S		N[+1]	515.261	3	1543.77	1543.77	0	-0.6	18	Non	231.87	231.87	231.87	2.99	1125	>sp|P02817|AMELX_BOVIN Amelogenin, X isoform OS=Bos taurus OX=9913 GN=AMELX PE=1 SV=2	1	hf1_eb_18273_82_20032023.ScanId;v=1;d1=17215.17215.3	controllerType=0 controllerNumber=1 scan=17215	42.3846
21544:2	1	M.PLPPHPGHPGYIN[+0.984]F.S		N[+1]	772.39	2	1543.77	1543.77	0	1.7	18	Non	247.25	201.06	201.06	4.63	1125	>sp|P02817|AMELX_BOVIN Amelogenin, X isoform OS=Bos taurus OX=9913 GN=AMELX PE=1 SV=2	1	hf1_eb_18273_82_20032023.ScanId;v=1;d1=18809.18809.2	controllerType=0 controllerNumber=1 scan=18809	45.3241
20421:3	1	M.PLPPHPGHPGYIN[+0.984]F.S		N[+1]	515.261	3	1543.77	1543.77	0	0.5	18	Non	274.54	274.54	274.54	4.87	1125	>sp|P02817|AMELX_BOVIN Amelogenin, X isoform OS=Bos taurus OX=9913 GN=AMELX PE=1 SV=2	1	hf1_eb_18273_82_20032023.ScanId;v=1;d1=18005.18005.3	controllerType=0 controllerNumber=1 scan=18005	43.8529
19692:3	1	M.PLPPHPGHPGYIN[+0.984]F.S		N[+1]	515.261	3	1543.77	1543.77	0	-1.4	18	Non	295.29	295.29	295.29	5.16	1125	>sp|P02817|AMELX_BOVIN Amelogenin, X isoform OS=Bos taurus OX=9913 GN=AMELX PE=1 SV=2	1	hf1_eb_18273_82_20032023.ScanId;v=1;d1=17437.17437.3	controllerType=0 controllerNumber=1 scan=17437	42.8001
18086:2	1	M.PLPPHPGHPGYIN[+0.984]F.S		N[+1]	772.389	2	1543.77	1543.77	0	0.5	18	Non	307.59	307.45	307.45	5.51	1125	>sp|P02817|AMELX_BOVIN Amelogenin, X isoform OS=Bos taurus OX=9913 GN=AMELX PE=1 SV=2	1	hf1_eb_18273_82_20032023.ScanId;v=1;d1=16252.16252.2	controllerType=0 controllerNumber=1 scan=16252	40.6556
19163:3	1	M.PLPPHPGHPGYIN[+0.984]F.S		N[+1]	515.261	3	1543.77	1543.77	0	-0.3	18	Non	312.47	312.47	312.47	5.04	1125	>sp|P02817|AMELX_BOVIN Amelogenin, X isoform OS=Bos taurus OX=9913 GN=AMELX PE=1 SV=2	1	hf1_eb_18273_82_20032023.ScanId;v=1;d1=17032.17032.3	controllerType=0 controllerNumber=1 scan=17032	42.046
20835:3	1	M.PLPPHPGHPGYIN[+0.984]F.S		N[+1]	515.261	3	1543.77	1543.77	0	0.5	18	Non	317.48	288.13	288.13	5.14	1125	>sp|P02817|AMELX_BOVIN Amelogenin, X isoform OS=Bos taurus OX=9913 GN=AMELX PE=1 SV=2	1	hf1_eb_18273_82_20032023.ScanId;v=1;d1=18306.18306.3	controllerType=0 controllerNumber=1 scan=18306	44.4131
21161:2	1	M.PLPPHPGHPGYIN[+0.984]F.S		N[+1]	772.389	2	1543.77	1543.77	0	0.8	18	Non	321.24	310.8	310.8	5.47	1125	>sp|P02817|AMELX_BOVIN Amelogenin, X isoform OS=Bos taurus OX=9913 GN=AMELX PE=1 SV=2	1	hf1_eb_18273_82_20032023.ScanId;v=1;d1=18546.18546.2	controllerType=0 controllerNumber=1 scan=18546	44.855
21625:3	1	M.PLPPHPGHPGYIN[+0.984]F.S		N[+1]	515.261	3	1543.77	1543.77	0	-0.5	18	Non	331.55	331.55	331.55	4.68	1125	>sp|P02817|AMELX_BOVIN Amelogenin, X isoform OS=Bos taurus OX=9913 GN=AMELX PE=1 SV=2	1	hf1_eb_18273_82_20032023.ScanId;v=1;d1=18875.18875.3	controllerType=0 controllerNumber=1 scan=18875	45.4521
20184:3	1	M.PLPPHPGHPGYIN[+0.984]F.S		N[+1]	515.261	3	1543.77	1543.77	0	-1.1	18	Non	343.7	343.66	343.66	5.23	1125	>sp|P02817|AMELX_BOVIN Amelogenin, X isoform OS=Bos taurus OX=9913 GN=AMELX PE=1 SV=2	1	hf1_eb_18273_82_20032023.ScanId;v=1;d1=17814.17814.3	controllerType=0 controllerNumber=1 scan=17814	43.4916
18874:3	1	M.PLPPHPGHPGYIN[+0.984]F.S		N[+1]	515.261	3	1543.77	1543.77	0	-0.5	18	Non	350.17	324.6	324.6	5.23	1125	>sp|P02817|AMELX_BOVIN Amelogenin, X isoform OS=Bos taurus OX=9913 GN=AMELX PE=1 SV=2	1	hf1_eb_18273_82_20032023.ScanId;v=1;d1=16835.16835.3	controllerType=0 controllerNumber=1 scan=16835	41.6968
19959:3	1	M.PLPPHPGHPGYIN[+0.984]F.S		N[+1]	515.261	3	1543.77	1543.77	0	-0.9	18	Non	352.62	327.93	327.93	5.11	1125	>sp|P02817|AMELX_BOVIN Amelogenin, X isoform OS=Bos taurus OX=9913 GN=AMELX PE=1 SV=2	1	hf1_eb_18273_82_20032023.ScanId;v=1;d1=17630.17630.3	controllerType=0 controllerNumber=1 scan=17630	43.1449
21063:2	1	M.PLPPHPGHPGYIN[+0.984]F.S		N[+1]	772.391	2	1543.77	1543.77	0	3.2	18	Non	353.92	353.92	353.92	4.68	1125	>sp|P02817|AMELX_BOVIN Amelogenin, X isoform OS=Bos taurus OX=9913 GN=AMELX PE=1 SV=2	1	hf1_eb_18273_82_20032023.ScanId;v=1;d1=18469.18469.2	controllerType=0 controllerNumber=1 scan=18469	44.7131
21357:3	1	M.PLPPHPGHPGYIN[+0.984]F.S		N[+1]	515.261	3	1543.77	1543.77	0	-0.9	18	Non	359.6	359.6	359.6	5.23	1125	>sp|P02817|AMELX_BOVIN Amelogenin, X isoform OS=Bos taurus OX=9913 GN=AMELX PE=1 SV=2	1	hf1_eb_18273_82_20032023.ScanId;v=1;d1=18685.18685.3	controllerType=0 controllerNumber=1 scan=18685	45.1052
21098:3	1	M.PLPPHPGHPGYIN[+0.984]F.S		N[+1]	515.261	3	1543.77	1543.77	0	-0.3	18	Non	426.83	426.83	426.83	6.16	1125	>sp|P02817|AMELX_BOVIN Amelogenin, X isoform OS=Bos taurus OX=9913 GN=AMELX PE=1 SV=2	1	hf1_eb_18273_82_20032023.ScanId;v=1;d1=18498.18498.3	controllerType=0 controllerNumber=1 scan=18498	44.7671
18935:2	1	M.PLPPHPGHPGYIN[+0.984]F.S		N[+1]	772.389	2	1543.77	1543.77	0	0.5	18	Non	457.47	364.51	364.51	6.42	1125	>sp|P02817|AMELX_BOVIN Amelogenin, X isoform OS=Bos taurus OX=9913 GN=AMELX PE=1 SV=2	1	hf1_eb_18273_82_20032023.ScanId;v=1;d1=16878.16878.2	controllerType=0 controllerNumber=1 scan=16878	41.774
19211:2	1	M.PLPPHPGHPGYIN[+0.984]F.S		N[+1]	772.388	2	1543.77	1543.77	0	0.2	18	Non	558.36	439.17	439.17	6.75	1125	>sp|P02817|AMELX_BOVIN Amelogenin, X isoform OS=Bos taurus OX=9913 GN=AMELX PE=1 SV=2	1	hf1_eb_18273_82_20032023.ScanId;v=1;d1=17069.17069.2	controllerType=0 controllerNumber=1 scan=17069	42.1134
19449:2	1	M.PLPPHPGHPGYIN[+0.984]F.S		N[+1]	772.388	2	1543.77	1543.77	0	-0.3	18	Non	596.47	508.14	508.14	7.22	1125	>sp|P02817|AMELX_BOVIN Amelogenin, X isoform OS=Bos taurus OX=9913 GN=AMELX PE=1 SV=2	1	hf1_eb_18273_82_20032023.ScanId;v=1;d1=17253.17253.2	controllerType=0 controllerNumber=1 scan=17253	42.4581
16750:2	1	M.PLPPHPGHPGY[+31.990]IN[+0.984]F.S		N[+1], Y[+32]	788.382	2	1575.76	1575.76	0	-1.8	18	Non	0.98	0.98	0	0.38	1125	>sp|P02817|AMELX_BOVIN Amelogenin, X isoform OS=Bos taurus OX=9913 GN=AMELX PE=1 SV=2	1	hf1_eb_18273_82_20032023.ScanId;v=1;d1=15249.15249.2	controllerType=0 controllerNumber=1 scan=15249	38.8638
22579:2	1	M.P[+31.990]LPPHPGHPGYIN[+0.984]F.S		N[+1], P[+32]	788.385	2	1575.76	1575.76	0	1.6	18	Non	15.6	15.6	11.42	0.41	1125	>sp|P02817|AMELX_BOVIN Amelogenin, X isoform OS=Bos taurus OX=9913 GN=AMELX PE=1 SV=2	1	hf1_eb_18273_82_20032023.ScanId;v=1;d1=19569.19569.2	controllerType=0 controllerNumber=1 scan=19569	46.6777
18479:2	1	M.PLPPHP[+15.995]GHPGYIN[+0.984]F.S		N[+1], P[+16]	780.387	2	1559.77	1559.76	0	2	18	Non	66.86	66.86	26.99	1.12	1125	>sp|P02817|AMELX_BOVIN Amelogenin, X isoform OS=Bos taurus OX=9913 GN=AMELX PE=1 SV=2	1	hf1_eb_18273_82_20032023.ScanId;v=1;d1=16549.16549.2	controllerType=0 controllerNumber=1 scan=16549	41.1912
18942:3	1	M.PLP[+15.995]PHPGHPGYIN[+0.984]F.S		N[+1], P[+16]	520.592	3	1559.76	1559.76	0	-1.1	18	Non	87.82	87.82	0	0.61	1125	>sp|P02817|AMELX_BOVIN Amelogenin, X isoform OS=Bos taurus OX=9913 GN=AMELX PE=1 SV=2	1	hf1_eb_18273_82_20032023.ScanId;v=1;d1=16882.16882.3	controllerType=0 controllerNumber=1 scan=16882	41.7799
17605:3	1	M.PLPPHPGHP[+15.995]GYIN[+0.984]F.S		N[+1], P[+16]	520.593	3	1559.77	1559.76	0	0.6	18	Non	142.49	142.49	0	1.17	1125	>sp|P02817|AMELX_BOVIN Amelogenin, X isoform OS=Bos taurus OX=9913 GN=AMELX PE=1 SV=2	1	hf1_eb_18273_82_20032023.ScanId;v=1;d1=15890.15890.3	controllerType=0 controllerNumber=1 scan=15890	40.0018
18286:3	1	M.PLPPHPGHP[+15.995]GYIN[+0.984]F.S		N[+1], P[+16]	520.592	3	1559.76	1559.76	0	-1.1	18	Non	195.28	195.28	0	2.42	1125	>sp|P02817|AMELX_BOVIN Amelogenin, X isoform OS=Bos taurus OX=9913 GN=AMELX PE=1 SV=2	1	hf1_eb_18273_82_20032023.ScanId;v=1;d1=16398.16398.3	controllerType=0 controllerNumber=1 scan=16398	40.9162
23820:2	1	M.PLPP[+31.990]HPGHPGYIN[+0.984]F.S		N[+1], P[+32]	788.384	2	1575.76	1575.76	0	1.2	18	Non	206	206	0	3.44	1125	>sp|P02817|AMELX_BOVIN Amelogenin, X isoform OS=Bos taurus OX=9913 GN=AMELX PE=1 SV=2	1	hf1_eb_18273_82_20032023.ScanId;v=1;d1=20447.20447.2	controllerType=0 controllerNumber=1 scan=20447	48.3005
24119:2	1	M.PLPP[+31.990]HPGHPGYIN[+0.984]F.S		N[+1], P[+32]	788.384	2	1575.76	1575.76	0	1.2	18	Non	271.84	248.56	0	4.8	1125	>sp|P02817|AMELX_BOVIN Amelogenin, X isoform OS=Bos taurus OX=9913 GN=AMELX PE=1 SV=2	1	hf1_eb_18273_82_20032023.ScanId;v=1;d1=20656.20656.2	controllerType=0 controllerNumber=1 scan=20656	48.678
18017:3	1	M.PLPPHPGHP[+15.995]GYIN[+0.984]F.S		N[+1], P[+16]	520.591	3	1559.76	1559.76	0	-2.8	18	Non	294.23	294.23	4.32	4.81	1125	>sp|P02817|AMELX_BOVIN Amelogenin, X isoform OS=Bos taurus OX=9913 GN=AMELX PE=1 SV=2	1	hf1_eb_18273_82_20032023.ScanId;v=1;d1=16203.16203.3	controllerType=0 controllerNumber=1 scan=16203	40.5716
21130:2	1	M.PLPPHPGHPGYIN[+0.984]FS[+79.966].Y		N[+1], S[+80]	855.885	2	1710.76	1710.77	0	-2.4	18	Non	156.83	156.83	95.27	2.27	1125	>sp|P02817|AMELX_BOVIN Amelogenin, X isoform OS=Bos taurus OX=9913 GN=AMELX PE=1 SV=2	1	hf1_eb_18273_82_20032023.ScanId;v=1;d1=18521.18521.2	controllerType=0 controllerNumber=1 scan=18521	44.8065
20970:2	1	M.PLPPHPGHPGYIN[+0.984]FS[+79.966].Y		N[+1], S[+80]	855.888	2	1710.77	1710.77	0	0.2	18	Non	174.92	174.92	174.92	2.98	1125	>sp|P02817|AMELX_BOVIN Amelogenin, X isoform OS=Bos taurus OX=9913 GN=AMELX PE=1 SV=2	1	hf1_eb_18273_82_20032023.ScanId;v=1;d1=18404.18404.2	controllerType=0 controllerNumber=1 scan=18404	44.5985
20850:2	1	M.PLPPHPGHPGYIN[+0.984]FS[+79.966].Y		N[+1], S[+80]	855.887	2	1710.77	1710.77	0	-0.6	18	Non	245.36	245.36	170.59	5.06	1125	>sp|P02817|AMELX_BOVIN Amelogenin, X isoform OS=Bos taurus OX=9913 GN=AMELX PE=1 SV=2	1	hf1_eb_18273_82_20032023.ScanId;v=1;d1=18317.18317.2	controllerType=0 controllerNumber=1 scan=18317	44.4323
20353:2	1	M.PLPPHPGHPGYIN[+0.984]FS[+79.966].Y		N[+1], S[+80]	855.888	2	1710.77	1710.77	0	0.3	18	Non	339.24	334.05	263.8	6.06	1125	>sp|P02817|AMELX_BOVIN Amelogenin, X isoform OS=Bos taurus OX=9913 GN=AMELX PE=1 SV=2	1	hf1_eb_18273_82_20032023.ScanId;v=1;d1=17951.17951.2	controllerType=0 controllerNumber=1 scan=17951	43.7477
20593:2	1	M.PLPPHPGHPGYIN[+0.984]FS[+79.966].Y		N[+1], S[+80]	855.887	2	1710.77	1710.77	0	-0.2	18	Non	492.63	412.08	326.04	6.93	1125	>sp|P02817|AMELX_BOVIN Amelogenin, X isoform OS=Bos taurus OX=9913 GN=AMELX PE=1 SV=2	1	hf1_eb_18273_82_20032023.ScanId;v=1;d1=18130.18130.2	controllerType=0 controllerNumber=1 scan=18130	44.0893
29496:3	1	M.PLPPHPGHPGYIN[+0.984]FS[+79.966]YEVLTPLK.W		N[+1], S[+80]	885.439	3	2654.3	2654.31	0	-1.1	18	NRagged	112.51	112.51	6	3.31	1125	>sp|P02817|AMELX_BOVIN Amelogenin, X isoform OS=Bos taurus OX=9913 GN=AMELX PE=1 SV=2	1	hf1_eb_18273_82_20032023.ScanId;v=1;d1=24429.24429.3	controllerType=0 controllerNumber=1 scan=24429	55.4997
29777:3	1	M.PLPPHPGHPGYIN[+0.984]FS[+79.966]YEVLTPLK.W		N[+1], S[+80]	885.441	3	2654.31	2654.31	0	1.1	18	NRagged	173.14	173.14	52.35	4.69	1125	>sp|P02817|AMELX_BOVIN Amelogenin, X isoform OS=Bos taurus OX=9913 GN=AMELX PE=1 SV=2	1	hf1_eb_18273_82_20032023.ScanId;v=1;d1=24627.24627.3	controllerType=0 controllerNumber=1 scan=24627	55.8584
29506:3	1	M.PLPPHPGHPGYIN[+0.984]FS[+79.966]YEVLTPLK.W		N[+1], S[+80]	885.44	3	2654.31	2654.31	0	0.4	18	NRagged	318.89	318.89	125.33	7.13	1125	>sp|P02817|AMELX_BOVIN Amelogenin, X isoform OS=Bos taurus OX=9913 GN=AMELX PE=1 SV=2	1	hf1_eb_18273_82_20032023.ScanId;v=1;d1=24436.24436.3	controllerType=0 controllerNumber=1 scan=24436	55.5131
28719:3	1	M.PLPPHPGHPGYIN[+0.984]FS[+79.966]YEVLTPLK.W		N[+1], S[+80]	885.442	3	2654.31	2654.31	0	2.4	18	NRagged	319.09	319.09	137.22	5.99	1125	>sp|P02817|AMELX_BOVIN Amelogenin, X isoform OS=Bos taurus OX=9913 GN=AMELX PE=1 SV=2	1	hf1_eb_18273_82_20032023.ScanId;v=1;d1=23883.23883.3	controllerType=0 controllerNumber=1 scan=23883	54.5086
29612:4	1	M.PLP[+31.990]P[+31.990]HPGHPGYIN[+0.984]FSY[+15.995]EVLTPLK.W		N[+1], P[+32]*2, Y[+16]	664.332	4	2654.31	2654.31	0	-3.1	18	NRagged	83.93	83.93	0	2.28	1125	>sp|P02817|AMELX_BOVIN Amelogenin, X isoform OS=Bos taurus OX=9913 GN=AMELX PE=1 SV=2	1	hf1_eb_18273_82_20032023.ScanId;v=1;d1=24509.24509.4	controllerType=0 controllerNumber=1 scan=24509	55.6476
02092:1	1	P.LPPH.P			463.265	1	463.265	463.266	0	-2.1	19	Non	227.57	134.48	134.48	1.13	1125	>sp|P02817|AMELX_BOVIN Amelogenin, X isoform OS=Bos taurus OX=9913 GN=AMELX PE=1 SV=2	1	hf1_eb_18273_82_20032023.ScanId;v=1;d1=3844.3844.2	controllerType=0 controllerNumber=1 scan=3844	16.6253
04361:1	1	P.LPPHP.G			560.319	1	560.319	560.319	0	-0.9	19	Non	159.31	63.27	63.27	1.34	1125	>sp|P02817|AMELX_BOVIN Amelogenin, X isoform OS=Bos taurus OX=9913 GN=AMELX PE=1 SV=2	1	hf1_eb_18273_82_20032023.ScanId;v=1;d1=5707.5707.4	controllerType=0 controllerNumber=1 scan=5707	20.405
04057:1	1	P.LPPHP.G			560.318	1	560.318	560.319	0	-1.6	19	Non	206.05	96.05	96.05	2.26	1125	>sp|P02817|AMELX_BOVIN Amelogenin, X isoform OS=Bos taurus OX=9913 GN=AMELX PE=1 SV=2	1	hf1_eb_18273_82_20032023.ScanId;v=1;d1=5429.5429.3	controllerType=0 controllerNumber=1 scan=5429	19.7581
04808:1	1	P.LPPHP.G			560.318	1	560.318	560.319	0	-1	19	Non	214.11	50.14	50.14	1.34	1125	>sp|P02817|AMELX_BOVIN Amelogenin, X isoform OS=Bos taurus OX=9913 GN=AMELX PE=1 SV=2	1	hf1_eb_18273_82_20032023.ScanId;v=1;d1=6067.6067.2	controllerType=0 controllerNumber=1 scan=6067	21.1448
03702:1	1	P.LPPHP.G			560.318	1	560.318	560.319	0	-2.2	19	Non	270.04	57.04	57.04	2.04	1125	>sp|P02817|AMELX_BOVIN Amelogenin, X isoform OS=Bos taurus OX=9913 GN=AMELX PE=1 SV=2	1	hf1_eb_18273_82_20032023.ScanId;v=1;d1=5139.5139.2	controllerType=0 controllerNumber=1 scan=5139	19.145
03708:1	1	P.LPPHP.G			560.318	1	560.318	560.319	0	-2.2	19	Non	272.29	56.79	56.79	2.25	1125	>sp|P02817|AMELX_BOVIN Amelogenin, X isoform OS=Bos taurus OX=9913 GN=AMELX PE=1 SV=2	1	hf1_eb_18273_82_20032023.ScanId;v=1;d1=5142.5142.2	controllerType=0 controllerNumber=1 scan=5142	19.149
06590:1	1	P.LPPHP.G			560.319	1	560.319	560.319	0	-0.9	19	Non	289.14	86.98	86.98	2.82	1125	>sp|P02817|AMELX_BOVIN Amelogenin, X isoform OS=Bos taurus OX=9913 GN=AMELX PE=1 SV=2	1	hf1_eb_18273_82_20032023.ScanId;v=1;d1=7555.7555.2	controllerType=0 controllerNumber=1 scan=7555	24.2343
08030:1	1	P.LPPHP.G			560.318	1	560.318	560.319	0	-1.3	19	Non	308.28	95.43	95.43	2.82	1125	>sp|P02817|AMELX_BOVIN Amelogenin, X isoform OS=Bos taurus OX=9913 GN=AMELX PE=1 SV=2	1	hf1_eb_18273_82_20032023.ScanId;v=1;d1=8710.8710.2	controllerType=0 controllerNumber=1 scan=8710	26.6404
08085:1	1	P.LPP[+31.990]HP.G		P[+32]	592.308	1	592.308	592.309	0	-0.8	19	Non	238	30.13	30.13	0.69	1125	>sp|P02817|AMELX_BOVIN Amelogenin, X isoform OS=Bos taurus OX=9913 GN=AMELX PE=1 SV=2	1	hf1_eb_18273_82_20032023.ScanId;v=1;d1=8754.8754.2	controllerType=0 controllerNumber=1 scan=8754	26.7296
08662:1	1	P.LPP[+31.990]HP.G		P[+32]	592.308	1	592.308	592.309	0	-1.6	19	Non	271.94	30.07	29.53	1.92	1125	>sp|P02817|AMELX_BOVIN Amelogenin, X isoform OS=Bos taurus OX=9913 GN=AMELX PE=1 SV=2	1	hf1_eb_18273_82_20032023.ScanId;v=1;d1=9208.9208.2	controllerType=0 controllerNumber=1 scan=9208	27.6174
05411:1	1	P.LPPHPG.H			617.34	1	617.34	617.341	0	-0.6	19	Non	159.13	159.13	159.13	1.23	1125	>sp|P02817|AMELX_BOVIN Amelogenin, X isoform OS=Bos taurus OX=9913 GN=AMELX PE=1 SV=2	1	hf1_eb_18273_82_20032023.ScanId;v=1;d1=6570.6570.2	controllerType=0 controllerNumber=1 scan=6570	22.1854
06283:1	1	P.LPPHPG.H			617.34	1	617.34	617.341	0	-1	19	Non	236.8	236.8	236.8	3.04	1125	>sp|P02817|AMELX_BOVIN Amelogenin, X isoform OS=Bos taurus OX=9913 GN=AMELX PE=1 SV=2	1	hf1_eb_18273_82_20032023.ScanId;v=1;d1=7303.7303.2	controllerType=0 controllerNumber=1 scan=7303	23.7234
03864:1	1	P.LPPHPG.H			617.34	1	617.34	617.341	0	-1.1	19	Non	282.85	282.85	282.85	4.65	1125	>sp|P02817|AMELX_BOVIN Amelogenin, X isoform OS=Bos taurus OX=9913 GN=AMELX PE=1 SV=2	1	hf1_eb_18273_82_20032023.ScanId;v=1;d1=5271.5271.2	controllerType=0 controllerNumber=1 scan=5271	19.4039
06459:1	1	P.LPP[+31.990]HPG.H		P[+32]	649.329	1	649.329	649.33	0	-1.6	19	Non	100.54	100.54	20	0.62	1125	>sp|P02817|AMELX_BOVIN Amelogenin, X isoform OS=Bos taurus OX=9913 GN=AMELX PE=1 SV=2	1	hf1_eb_18273_82_20032023.ScanId;v=1;d1=7443.7443.2	controllerType=0 controllerNumber=1 scan=7443	24.0038
06013:1	1	P.LPP[+31.990]HPG.H		P[+32]	649.33	1	649.33	649.33	0	-0.7	19	Non	152.99	152.99	20	1.23	1125	>sp|P02817|AMELX_BOVIN Amelogenin, X isoform OS=Bos taurus OX=9913 GN=AMELX PE=1 SV=2	1	hf1_eb_18273_82_20032023.ScanId;v=1;d1=7083.7083.3	controllerType=0 controllerNumber=1 scan=7083	23.2824
06630:1	1	P.LPP[+31.990]HPG.H		P[+32]	649.33	1	649.33	649.33	0	-1.2	19	Non	200.02	200.02	38.85	2.45	1125	>sp|P02817|AMELX_BOVIN Amelogenin, X isoform OS=Bos taurus OX=9913 GN=AMELX PE=1 SV=2	1	hf1_eb_18273_82_20032023.ScanId;v=1;d1=7587.7587.2	controllerType=0 controllerNumber=1 scan=7587	24.2914
06219:1	1	P.LPP[+31.990]HPG.H		P[+32]	649.33	1	649.33	649.33	0	-0.9	19	Non	269.45	269.45	20	4.37	1125	>sp|P02817|AMELX_BOVIN Amelogenin, X isoform OS=Bos taurus OX=9913 GN=AMELX PE=1 SV=2	1	hf1_eb_18273_82_20032023.ScanId;v=1;d1=7255.7255.3	controllerType=0 controllerNumber=1 scan=7255	23.6313
03112:2	1	P.LPPHPGH.P			377.703	2	754.398	754.399	0	-1.6	19	Non	197.34	120.01	120.01	1.07	1125	>sp|P02817|AMELX_BOVIN Amelogenin, X isoform OS=Bos taurus OX=9913 GN=AMELX PE=1 SV=2	1	hf1_eb_18273_82_20032023.ScanId;v=1;d1=4659.4659.2	controllerType=0 controllerNumber=1 scan=4659	18.1717
02858:2	1	P.LPPHPGH.P			377.703	2	754.398	754.399	0	-1.7	19	Non	267.42	181.05	181.05	2.81	1125	>sp|P02817|AMELX_BOVIN Amelogenin, X isoform OS=Bos taurus OX=9913 GN=AMELX PE=1 SV=2	1	hf1_eb_18273_82_20032023.ScanId;v=1;d1=4442.4442.2	controllerType=0 controllerNumber=1 scan=4442	17.72
02958:2	1	P.LPPHPGH.P			377.703	2	754.398	754.399	0	-1.6	19	Non	270.15	205.85	205.85	3.05	1125	>sp|P02817|AMELX_BOVIN Amelogenin, X isoform OS=Bos taurus OX=9913 GN=AMELX PE=1 SV=2	1	hf1_eb_18273_82_20032023.ScanId;v=1;d1=4530.4530.2	controllerType=0 controllerNumber=1 scan=4530	17.9059
02549:2	1	P.LPPHPGH.P			377.703	2	754.398	754.399	0	-1.8	19	Non	398.54	352.05	352.05	5.3	1125	>sp|P02817|AMELX_BOVIN Amelogenin, X isoform OS=Bos taurus OX=9913 GN=AMELX PE=1 SV=2	1	hf1_eb_18273_82_20032023.ScanId;v=1;d1=4198.4198.2	controllerType=0 controllerNumber=1 scan=4198	17.2699
02251:2	1	P.LPPHPGH.P			377.703	2	754.398	754.399	0	-1.6	19	Non	403.61	328.94	328.94	5.28	1125	>sp|P02817|AMELX_BOVIN Amelogenin, X isoform OS=Bos taurus OX=9913 GN=AMELX PE=1 SV=2	1	hf1_eb_18273_82_20032023.ScanId;v=1;d1=3971.3971.2	controllerType=0 controllerNumber=1 scan=3971	16.8546
02783:2	1	P.LPPHPGH.P			377.703	2	754.398	754.399	0	-1.4	19	Non	430.98	314.3	314.3	5.3	1125	>sp|P02817|AMELX_BOVIN Amelogenin, X isoform OS=Bos taurus OX=9913 GN=AMELX PE=1 SV=2	1	hf1_eb_18273_82_20032023.ScanId;v=1;d1=4384.4384.2	controllerType=0 controllerNumber=1 scan=4384	17.613
04777:2	1	P.LPPHP[+15.995]GH.P		P[+16]	385.7	2	770.393	770.394	0	-1.7	19	Non	244.87	212.08	5.49	4.21	1125	>sp|P02817|AMELX_BOVIN Amelogenin, X isoform OS=Bos taurus OX=9913 GN=AMELX PE=1 SV=2	1	hf1_eb_18273_82_20032023.ScanId;v=1;d1=6041.6041.2	controllerType=0 controllerNumber=1 scan=6041	21.0888
06813:2	1	P.LPPHPGHP.G			426.229	2	851.451	851.452	0	-1.9	19	Non	180.46	35.83	35.83	0.86	1125	>sp|P02817|AMELX_BOVIN Amelogenin, X isoform OS=Bos taurus OX=9913 GN=AMELX PE=1 SV=2	1	hf1_eb_18273_82_20032023.ScanId;v=1;d1=7733.7733.2	controllerType=0 controllerNumber=1 scan=7733	24.6183
06822:2	1	P.LPPHPGHP.G			426.229	2	851.451	851.452	0	-2	19	Non	204.42	42.5	42.5	1.11	1125	>sp|P02817|AMELX_BOVIN Amelogenin, X isoform OS=Bos taurus OX=9913 GN=AMELX PE=1 SV=2	1	hf1_eb_18273_82_20032023.ScanId;v=1;d1=7743.7743.2	controllerType=0 controllerNumber=1 scan=7743	24.6435
05821:2	1	P.LPPHPGHP.G			426.229	2	851.451	851.452	0	-1.4	19	Non	240.29	57.6	57.6	2.84	1125	>sp|P02817|AMELX_BOVIN Amelogenin, X isoform OS=Bos taurus OX=9913 GN=AMELX PE=1 SV=2	1	hf1_eb_18273_82_20032023.ScanId;v=1;d1=6925.6925.2	controllerType=0 controllerNumber=1 scan=6925	22.9628
03246:2	1	P.LPPHPGHP.G			426.229	2	851.451	851.452	0	-1.9	19	Non	478.45	184.13	184.13	4.56	1125	>sp|P02817|AMELX_BOVIN Amelogenin, X isoform OS=Bos taurus OX=9913 GN=AMELX PE=1 SV=2	1	hf1_eb_18273_82_20032023.ScanId;v=1;d1=4769.4769.2	controllerType=0 controllerNumber=1 scan=4769	18.3949
03672:2	1	P.LPPHPGHP.G			426.229	2	851.45	851.452	0	-2.4	19	Non	514.89	195.64	195.64	4.99	1125	>sp|P02817|AMELX_BOVIN Amelogenin, X isoform OS=Bos taurus OX=9913 GN=AMELX PE=1 SV=2	1	hf1_eb_18273_82_20032023.ScanId;v=1;d1=5114.5114.2	controllerType=0 controllerNumber=1 scan=5114	19.0905
03468:2	1	P.LPPHPGHP.G			426.229	2	851.451	851.452	0	-1.8	19	Non	534.12	199.14	199.14	5.42	1125	>sp|P02817|AMELX_BOVIN Amelogenin, X isoform OS=Bos taurus OX=9913 GN=AMELX PE=1 SV=2	1	hf1_eb_18273_82_20032023.ScanId;v=1;d1=4948.4948.2	controllerType=0 controllerNumber=1 scan=4948	18.7448
02736:2	1	P.LPPHPGHP[+15.995].G		P[+16]	434.227	2	867.446	867.447	0	-1.3	19	Non	185.96	69.77	2.99	1.37	1125	>sp|P02817|AMELX_BOVIN Amelogenin, X isoform OS=Bos taurus OX=9913 GN=AMELX PE=1 SV=2	1	hf1_eb_18273_82_20032023.ScanId;v=1;d1=4343.4343.2	controllerType=0 controllerNumber=1 scan=4343	17.5384
07277:2	1	P.LPP[+15.995]HPGHP.G		P[+16]	434.227	2	867.447	867.447	0	-0.2	19	Non	203.12	90.05	0	1.97	1125	>sp|P02817|AMELX_BOVIN Amelogenin, X isoform OS=Bos taurus OX=9913 GN=AMELX PE=1 SV=2	1	hf1_eb_18273_82_20032023.ScanId;v=1;d1=8107.8107.2	controllerType=0 controllerNumber=1 scan=8107	25.3804
07054:2	1	P.LPP[+15.995]HPGHP.G		P[+16]	434.227	2	867.446	867.447	0	-0.9	19	Non	205.16	88.78	0	1.97	1125	>sp|P02817|AMELX_BOVIN Amelogenin, X isoform OS=Bos taurus OX=9913 GN=AMELX PE=1 SV=2	1	hf1_eb_18273_82_20032023.ScanId;v=1;d1=7928.7928.2	controllerType=0 controllerNumber=1 scan=7928	25.0277
02496:2	1	P.LPPHPGHP[+15.995].G		P[+16]	434.226	2	867.446	867.447	0	-1.9	19	Non	432.57	164.13	54.53	4.53	1125	>sp|P02817|AMELX_BOVIN Amelogenin, X isoform OS=Bos taurus OX=9913 GN=AMELX PE=1 SV=2	1	hf1_eb_18273_82_20032023.ScanId;v=1;d1=4155.4155.2	controllerType=0 controllerNumber=1 scan=4155	17.1854
00058:2	1	P.LPPHPGHPG.Y			454.739	2	908.471	908.474	0	-2.4	19	Non	117.62	117.62	117.62	2.35	1125	>sp|P02817|AMELX_BOVIN Amelogenin, X isoform OS=Bos taurus OX=9913 GN=AMELX PE=1 SV=2	1	hf1_eb_18273_82_20032023.ScanId;v=1;d1=555.555.2	controllerType=0 controllerNumber=1 scan=555	3.1618
03769:2	1	P.LPPHPGHPG.Y			454.74	2	908.473	908.474	0	-0.8	19	Non	406.94	389.46	389.46	6	1125	>sp|P02817|AMELX_BOVIN Amelogenin, X isoform OS=Bos taurus OX=9913 GN=AMELX PE=1 SV=2	1	hf1_eb_18273_82_20032023.ScanId;v=1;d1=5193.5193.2	controllerType=0 controllerNumber=1 scan=5193	19.2559
02711:2	1	P.LPPHPGHPG.Y			454.74	2	908.472	908.474	0	-1.6	19	Non	471.15	385.3	385.3	6.25	1125	>sp|P02817|AMELX_BOVIN Amelogenin, X isoform OS=Bos taurus OX=9913 GN=AMELX PE=1 SV=2	1	hf1_eb_18273_82_20032023.ScanId;v=1;d1=4327.4327.2	controllerType=0 controllerNumber=1 scan=4327	17.5108
03569:2	1	P.LPPHPGHPG.Y			454.74	2	908.472	908.474	0	-1.7	19	Non	487.65	377.58	377.58	6.68	1125	>sp|P02817|AMELX_BOVIN Amelogenin, X isoform OS=Bos taurus OX=9913 GN=AMELX PE=1 SV=2	1	hf1_eb_18273_82_20032023.ScanId;v=1;d1=5029.5029.2	controllerType=0 controllerNumber=1 scan=5029	18.9165
02948:2	1	P.LPPHPGHPG.Y			454.74	2	908.473	908.474	0	-0.8	19	Non	544.85	485.99	485.99	6.77	1125	>sp|P02817|AMELX_BOVIN Amelogenin, X isoform OS=Bos taurus OX=9913 GN=AMELX PE=1 SV=2	1	hf1_eb_18273_82_20032023.ScanId;v=1;d1=4520.4520.2	controllerType=0 controllerNumber=1 scan=4520	17.8873
03354:2	1	P.LPPHPGHPG.Y			454.74	2	908.472	908.474	0	-1.3	19	Non	556.63	509.99	509.99	6.77	1125	>sp|P02817|AMELX_BOVIN Amelogenin, X isoform OS=Bos taurus OX=9913 GN=AMELX PE=1 SV=2	1	hf1_eb_18273_82_20032023.ScanId;v=1;d1=4859.4859.2	controllerType=0 controllerNumber=1 scan=4859	18.5768
03145:2	1	P.LPPHPGHPG.Y			454.74	2	908.473	908.474	0	-1.2	19	Non	557.07	448.53	448.53	6.77	1125	>sp|P02817|AMELX_BOVIN Amelogenin, X isoform OS=Bos taurus OX=9913 GN=AMELX PE=1 SV=2	1	hf1_eb_18273_82_20032023.ScanId;v=1;d1=4690.4690.2	controllerType=0 controllerNumber=1 scan=4690	18.2343
01785:2	1	P.LPPHPGHP[+15.995]G.Y		P[+16]	462.737	2	924.467	924.469	0	-1.5	19	Non	219.52	219.52	4.63	3.06	1125	>sp|P02817|AMELX_BOVIN Amelogenin, X isoform OS=Bos taurus OX=9913 GN=AMELX PE=1 SV=2	1	hf1_eb_18273_82_20032023.ScanId;v=1;d1=3621.3621.2	controllerType=0 controllerNumber=1 scan=3621	16.2218
06775:2	1	P.LPPHP[+15.995]GHPG.Y		P[+16]	462.736	2	924.464	924.469	0	-5	19	Non	250.5	250.5	0	3.21	1125	>sp|P02817|AMELX_BOVIN Amelogenin, X isoform OS=Bos taurus OX=9913 GN=AMELX PE=1 SV=2	1	hf1_eb_18273_82_20032023.ScanId;v=1;d1=7702.7702.2	controllerType=0 controllerNumber=1 scan=7702	24.5444
06743:2	1	P.LPPHP[+15.995]GHPG.Y		P[+16]	462.735	2	924.463	924.469	0	-5.8	19	Non	272.23	272.23	0	3.21	1125	>sp|P02817|AMELX_BOVIN Amelogenin, X isoform OS=Bos taurus OX=9913 GN=AMELX PE=1 SV=2	1	hf1_eb_18273_82_20032023.ScanId;v=1;d1=7675.7675.2	controllerType=0 controllerNumber=1 scan=7675	24.4804
02280:2	1	P.LPPHPGHP[+15.995]G.Y		P[+16]	462.737	2	924.467	924.469	0	-1.9	19	Non	381.57	258.29	51.14	5.09	1125	>sp|P02817|AMELX_BOVIN Amelogenin, X isoform OS=Bos taurus OX=9913 GN=AMELX PE=1 SV=2	1	hf1_eb_18273_82_20032023.ScanId;v=1;d1=3993.3993.2	controllerType=0 controllerNumber=1 scan=3993	16.8935
01831:2	1	P.LPPHPGHP[+15.995]G.Y		P[+16]	462.737	2	924.467	924.469	0	-1.7	19	Non	384.08	384.08	55.89	6.01	1125	>sp|P02817|AMELX_BOVIN Amelogenin, X isoform OS=Bos taurus OX=9913 GN=AMELX PE=1 SV=2	1	hf1_eb_18273_82_20032023.ScanId;v=1;d1=3652.3652.2	controllerType=0 controllerNumber=1 scan=3652	16.2761
05006:2	1	P.LPPHP[+31.990]GHPG.Y		P[+32]	470.736	2	940.464	940.463	0	0.4	19	Non	411.51	350.22	33.15	5.29	1125	>sp|P02817|AMELX_BOVIN Amelogenin, X isoform OS=Bos taurus OX=9913 GN=AMELX PE=1 SV=2	1	hf1_eb_18273_82_20032023.ScanId;v=1;d1=6225.6225.2	controllerType=0 controllerNumber=1 scan=6225	21.4539
02343:2	1	P.LPPHPGHP[+15.995]G.Y		P[+16]	462.737	2	924.467	924.469	0	-1.9	19	Non	420.39	315.97	61.5	5.32	1125	>sp|P02817|AMELX_BOVIN Amelogenin, X isoform OS=Bos taurus OX=9913 GN=AMELX PE=1 SV=2	1	hf1_eb_18273_82_20032023.ScanId;v=1;d1=4037.4037.2	controllerType=0 controllerNumber=1 scan=4037	16.9716
05405:2	1	P.LPPHP[+31.990]GHPG.Y		P[+32]	470.735	2	940.462	940.463	0	-1.4	19	Non	421.48	304.37	36.23	5.32	1125	>sp|P02817|AMELX_BOVIN Amelogenin, X isoform OS=Bos taurus OX=9913 GN=AMELX PE=1 SV=2	1	hf1_eb_18273_82_20032023.ScanId;v=1;d1=6565.6565.2	controllerType=0 controllerNumber=1 scan=6565	22.1752
05182:2	1	P.LPPHP[+31.990]GHPG.Y		P[+32]	470.735	2	940.463	940.463	0	-1	19	Non	485.73	376.88	35.1	6.03	1125	>sp|P02817|AMELX_BOVIN Amelogenin, X isoform OS=Bos taurus OX=9913 GN=AMELX PE=1 SV=2	1	hf1_eb_18273_82_20032023.ScanId;v=1;d1=6379.6379.2	controllerType=0 controllerNumber=1 scan=6379	21.8006
02093:2	1	P.LPPHPGHP[+15.995]G.Y		P[+16]	462.737	2	924.467	924.469	0	-2.1	19	Non	492.06	418.34	68.43	5.92	1125	>sp|P02817|AMELX_BOVIN Amelogenin, X isoform OS=Bos taurus OX=9913 GN=AMELX PE=1 SV=2	1	hf1_eb_18273_82_20032023.ScanId;v=1;d1=3844.3844.2	controllerType=0 controllerNumber=1 scan=3844	16.6253
06307:2	1	P.LPPHPGHPGY.I			536.272	2	1071.54	1071.54	0	-0.1	19	Non	505.22	439.2	439.2	6.93	1125	>sp|P02817|AMELX_BOVIN Amelogenin, X isoform OS=Bos taurus OX=9913 GN=AMELX PE=1 SV=2	1	hf1_eb_18273_82_20032023.ScanId;v=1;d1=7322.7322.2	controllerType=0 controllerNumber=1 scan=7322	23.7578
06101:2	1	P.LPPHPGHPGY.I			536.272	2	1071.54	1071.54	0	-0.7	19	Non	548.5	440.18	440.18	7.01	1125	>sp|P02817|AMELX_BOVIN Amelogenin, X isoform OS=Bos taurus OX=9913 GN=AMELX PE=1 SV=2	1	hf1_eb_18273_82_20032023.ScanId;v=1;d1=7154.7154.2	controllerType=0 controllerNumber=1 scan=7154	23.4204
05711:2	1	P.LPPHPGHPGY.I			536.271	2	1071.53	1071.54	0	-2.3	19	Non	571.46	500.74	500.74	7.12	1125	>sp|P02817|AMELX_BOVIN Amelogenin, X isoform OS=Bos taurus OX=9913 GN=AMELX PE=1 SV=2	1	hf1_eb_18273_82_20032023.ScanId;v=1;d1=6826.6826.2	controllerType=0 controllerNumber=1 scan=6826	22.726
05884:2	1	P.LPPHPGHPGY.I			536.271	2	1071.54	1071.54	0	-1.6	19	Non	590.92	476.94	476.94	7.47	1125	>sp|P02817|AMELX_BOVIN Amelogenin, X isoform OS=Bos taurus OX=9913 GN=AMELX PE=1 SV=2	1	hf1_eb_18273_82_20032023.ScanId;v=1;d1=6978.6978.2	controllerType=0 controllerNumber=1 scan=6978	23.075
09063:2	1	P.LPPHP[+31.990]GHPGY.I		P[+32]	552.263	2	1103.52	1103.53	0	-6.8	19	Non	185.69	88.54	20	0.35	1125	>sp|P02817|AMELX_BOVIN Amelogenin, X isoform OS=Bos taurus OX=9913 GN=AMELX PE=1 SV=2	1	hf1_eb_18273_82_20032023.ScanId;v=1;d1=9532.9532.2	controllerType=0 controllerNumber=1 scan=9532	28.2736
08848:2	1	P.LPPHP[+31.990]GHPGY.I		P[+32]	552.263	2	1103.52	1103.53	0	-8	19	Non	211.16	49.43	20	0.2	1125	>sp|P02817|AMELX_BOVIN Amelogenin, X isoform OS=Bos taurus OX=9913 GN=AMELX PE=1 SV=2	1	hf1_eb_18273_82_20032023.ScanId;v=1;d1=9362.9362.2	controllerType=0 controllerNumber=1 scan=9362	27.9288
10824:3	1	P.LPPHPGHPGYI.N			395.546	3	1184.62	1184.62	0	0.8	19	Non	195.06	195.06	195.06	2.31	1125	>sp|P02817|AMELX_BOVIN Amelogenin, X isoform OS=Bos taurus OX=9913 GN=AMELX PE=1 SV=2	1	hf1_eb_18273_82_20032023.ScanId;v=1;d1=10887.10887.3	controllerType=0 controllerNumber=1 scan=10887	30.8472
10627:3	1	P.LPPHPGHPGYI.N			395.545	3	1184.62	1184.62	0	0.3	19	Non	336.63	336.63	336.63	4.92	1125	>sp|P02817|AMELX_BOVIN Amelogenin, X isoform OS=Bos taurus OX=9913 GN=AMELX PE=1 SV=2	1	hf1_eb_18273_82_20032023.ScanId;v=1;d1=10727.10727.3	controllerType=0 controllerNumber=1 scan=10727	30.5398
09909:3	1	P.LPPHPGHPGYI.N			395.545	3	1184.62	1184.62	0	-0.8	19	Non	359.15	359.15	359.15	5.17	1125	>sp|P02817|AMELX_BOVIN Amelogenin, X isoform OS=Bos taurus OX=9913 GN=AMELX PE=1 SV=2	1	hf1_eb_18273_82_20032023.ScanId;v=1;d1=10182.10182.3	controllerType=0 controllerNumber=1 scan=10182	29.5054
10138:3	1	P.LPPHPGHPGYI.N			395.545	3	1184.62	1184.62	0	-1.1	19	Non	370.12	358.74	358.74	5.31	1125	>sp|P02817|AMELX_BOVIN Amelogenin, X isoform OS=Bos taurus OX=9913 GN=AMELX PE=1 SV=2	1	hf1_eb_18273_82_20032023.ScanId;v=1;d1=10358.10358.3	controllerType=0 controllerNumber=1 scan=10358	29.8565
10378:3	1	P.LPPHPGHPGYI.N			395.545	3	1184.62	1184.62	0	0	19	Non	406.29	360.37	360.37	5.99	1125	>sp|P02817|AMELX_BOVIN Amelogenin, X isoform OS=Bos taurus OX=9913 GN=AMELX PE=1 SV=2	1	hf1_eb_18273_82_20032023.ScanId;v=1;d1=10540.10540.3	controllerType=0 controllerNumber=1 scan=10540	30.1987
10539:2	1	P.LPPHPGHPGYI.N			592.814	2	1184.62	1184.62	0	0.1	19	Non	512.52	388.23	388.23	6.91	1125	>sp|P02817|AMELX_BOVIN Amelogenin, X isoform OS=Bos taurus OX=9913 GN=AMELX PE=1 SV=2	1	hf1_eb_18273_82_20032023.ScanId;v=1;d1=10664.10664.2	controllerType=0 controllerNumber=1 scan=10664	30.4282
10303:2	1	P.LPPHPGHPGYI.N			592.814	2	1184.62	1184.62	0	-1	19	Non	554.5	381.24	381.24	6.59	1125	>sp|P02817|AMELX_BOVIN Amelogenin, X isoform OS=Bos taurus OX=9913 GN=AMELX PE=1 SV=2	1	hf1_eb_18273_82_20032023.ScanId;v=1;d1=10481.10481.2	controllerType=0 controllerNumber=1 scan=10481	30.0878
10062:2	1	P.LPPHPGHPGYI.N			592.813	2	1184.62	1184.62	0	-1.2	19	Non	595.31	490.26	490.26	7.47	1125	>sp|P02817|AMELX_BOVIN Amelogenin, X isoform OS=Bos taurus OX=9913 GN=AMELX PE=1 SV=2	1	hf1_eb_18273_82_20032023.ScanId;v=1;d1=10302.10302.2	controllerType=0 controllerNumber=1 scan=10302	29.748
08061:2	1	P.LPPHPGHPGYIN.F			649.835	2	1298.66	1298.66	0	-0.9	19	Non	294.39	274.73	274.73	4.79	1125	>sp|P02817|AMELX_BOVIN Amelogenin, X isoform OS=Bos taurus OX=9913 GN=AMELX PE=1 SV=2	1	hf1_eb_18273_82_20032023.ScanId;v=1;d1=8735.8735.2	controllerType=0 controllerNumber=1 scan=8735	26.6949
08451:2	1	P.LPPHPGHPGYIN.F			649.835	2	1298.66	1298.66	0	-1.1	19	Non	342.25	326.14	326.14	5.42	1125	>sp|P02817|AMELX_BOVIN Amelogenin, X isoform OS=Bos taurus OX=9913 GN=AMELX PE=1 SV=2	1	hf1_eb_18273_82_20032023.ScanId;v=1;d1=9042.9042.2	controllerType=0 controllerNumber=1 scan=9042	27.2858
08508:2	1	P.LPPHPGHPGYIN.F			649.835	2	1298.66	1298.66	0	-0.3	19	Non	373.7	335.18	335.18	5.56	1125	>sp|P02817|AMELX_BOVIN Amelogenin, X isoform OS=Bos taurus OX=9913 GN=AMELX PE=1 SV=2	1	hf1_eb_18273_82_20032023.ScanId;v=1;d1=9088.9088.2	controllerType=0 controllerNumber=1 scan=9088	27.3781
08298:2	1	P.LPPHPGHPGYIN.F			649.835	2	1298.66	1298.66	0	-0.7	19	Non	527.06	435.22	435.22	7.01	1125	>sp|P02817|AMELX_BOVIN Amelogenin, X isoform OS=Bos taurus OX=9913 GN=AMELX PE=1 SV=2	1	hf1_eb_18273_82_20032023.ScanId;v=1;d1=8914.8914.2	controllerType=0 controllerNumber=1 scan=8914	27.0382
10141:3	1	P.LPPHPGHPGYIN[+0.984].F		N[+1]	433.887	3	1299.65	1299.65	0	-1.7	19	Non	140.34	140.34	140.34	1.07	1125	>sp|P02817|AMELX_BOVIN Amelogenin, X isoform OS=Bos taurus OX=9913 GN=AMELX PE=1 SV=2	1	hf1_eb_18273_82_20032023.ScanId;v=1;d1=10360.10360.2	controllerType=0 controllerNumber=1 scan=10360	29.8605
09658:3	1	P.LPPHPGHPGYIN[+0.984].F		N[+1]	433.887	3	1299.65	1299.65	0	-0.1	19	Non	219.22	219.22	219.22	2.84	1125	>sp|P02817|AMELX_BOVIN Amelogenin, X isoform OS=Bos taurus OX=9913 GN=AMELX PE=1 SV=2	1	hf1_eb_18273_82_20032023.ScanId;v=1;d1=9989.9989.3	controllerType=0 controllerNumber=1 scan=9989	29.1484
09906:3	1	P.LPPHPGHPGYIN[+0.984].F		N[+1]	433.887	3	1299.65	1299.65	0	-0.8	19	Non	265.18	265.18	265.18	4.15	1125	>sp|P02817|AMELX_BOVIN Amelogenin, X isoform OS=Bos taurus OX=9913 GN=AMELX PE=1 SV=2	1	hf1_eb_18273_82_20032023.ScanId;v=1;d1=10179.10179.3	controllerType=0 controllerNumber=1 scan=10179	29.4989
08983:3	1	P.LPPHPGHPGYIN[+0.984].F		N[+1]	433.887	3	1299.65	1299.65	0	-0.5	19	Non	272.88	272.88	272.88	4.71	1125	>sp|P02817|AMELX_BOVIN Amelogenin, X isoform OS=Bos taurus OX=9913 GN=AMELX PE=1 SV=2	1	hf1_eb_18273_82_20032023.ScanId;v=1;d1=9468.9468.3	controllerType=0 controllerNumber=1 scan=9468	28.1351
09193:3	1	P.LPPHPGHPGYIN[+0.984].F		N[+1]	433.888	3	1299.65	1299.65	0	0.2	19	Non	360.6	360.6	360.6	5.75	1125	>sp|P02817|AMELX_BOVIN Amelogenin, X isoform OS=Bos taurus OX=9913 GN=AMELX PE=1 SV=2	1	hf1_eb_18273_82_20032023.ScanId;v=1;d1=9638.9638.3	controllerType=0 controllerNumber=1 scan=9638	28.4718
09418:3	1	P.LPPHPGHPGYIN[+0.984].F		N[+1]	433.888	3	1299.65	1299.65	0	0.8	19	Non	363.47	361.41	361.41	5.99	1125	>sp|P02817|AMELX_BOVIN Amelogenin, X isoform OS=Bos taurus OX=9913 GN=AMELX PE=1 SV=2	1	hf1_eb_18273_82_20032023.ScanId;v=1;d1=9812.9812.3	controllerType=0 controllerNumber=1 scan=9812	28.8122
10075:2	1	P.LPPHPGHPGYIN[+0.984].F		N[+1]	650.327	2	1299.65	1299.65	0	-1.1	19	Non	370.19	330.94	330.94	5.69	1125	>sp|P02817|AMELX_BOVIN Amelogenin, X isoform OS=Bos taurus OX=9913 GN=AMELX PE=1 SV=2	1	hf1_eb_18273_82_20032023.ScanId;v=1;d1=10311.10311.2	controllerType=0 controllerNumber=1 scan=10311	29.7637
08922:2	1	P.LPPHPGHPGYIN[+0.984].F		N[+1]	650.327	2	1299.65	1299.65	0	-0.9	19	Non	425.23	347.72	347.72	5.67	1125	>sp|P02817|AMELX_BOVIN Amelogenin, X isoform OS=Bos taurus OX=9913 GN=AMELX PE=1 SV=2	1	hf1_eb_18273_82_20032023.ScanId;v=1;d1=9421.9421.2	controllerType=0 controllerNumber=1 scan=9421	28.0413
09848:2	1	P.LPPHPGHPGYIN[+0.984].F		N[+1]	650.327	2	1299.65	1299.65	0	-0.5	19	Non	533.89	422.59	422.59	6.59	1125	>sp|P02817|AMELX_BOVIN Amelogenin, X isoform OS=Bos taurus OX=9913 GN=AMELX PE=1 SV=2	1	hf1_eb_18273_82_20032023.ScanId;v=1;d1=10135.10135.2	controllerType=0 controllerNumber=1 scan=10135	29.4207
09362:2	1	P.LPPHPGHPGYIN[+0.984].F		N[+1]	650.327	2	1299.65	1299.65	0	-0.5	19	Non	600.68	552.24	552.24	8.47	1125	>sp|P02817|AMELX_BOVIN Amelogenin, X isoform OS=Bos taurus OX=9913 GN=AMELX PE=1 SV=2	1	hf1_eb_18273_82_20032023.ScanId;v=1;d1=9769.9769.2	controllerType=0 controllerNumber=1 scan=9769	28.7292
09136:2	1	P.LPPHPGHPGYIN[+0.984].F		N[+1]	650.327	2	1299.65	1299.65	0	-1.1	19	Non	610.75	509.77	509.77	8.47	1125	>sp|P02817|AMELX_BOVIN Amelogenin, X isoform OS=Bos taurus OX=9913 GN=AMELX PE=1 SV=2	1	hf1_eb_18273_82_20032023.ScanId;v=1;d1=9593.9593.2	controllerType=0 controllerNumber=1 scan=9593	28.3811
09604:2	1	P.LPPHPGHPGYIN[+0.984].F		N[+1]	650.327	2	1299.65	1299.65	0	-0.3	19	Non	612.5	526.2	526.2	8.47	1125	>sp|P02817|AMELX_BOVIN Amelogenin, X isoform OS=Bos taurus OX=9913 GN=AMELX PE=1 SV=2	1	hf1_eb_18273_82_20032023.ScanId;v=1;d1=9950.9950.2	controllerType=0 controllerNumber=1 scan=9950	29.0753
12767:2	1	P.LPP[+31.990]HPGHPGYIN[+0.984].F		N[+1], P[+32]	666.322	2	1331.64	1331.64	0	-0.3	19	Non	148.95	118.44	39.86	1.29	1125	>sp|P02817|AMELX_BOVIN Amelogenin, X isoform OS=Bos taurus OX=9913 GN=AMELX PE=1 SV=2	1	hf1_eb_18273_82_20032023.ScanId;v=1;d1=12340.12340.2	controllerType=0 controllerNumber=1 scan=12340	33.5745
07926:3	1	P.LPPHPGHP[+15.995]GYIN[+0.984].F		N[+1], P[+16]	439.219	3	1315.64	1315.64	0	-1.5	19	Non	205.31	183.3	8.39	2.31	1125	>sp|P02817|AMELX_BOVIN Amelogenin, X isoform OS=Bos taurus OX=9913 GN=AMELX PE=1 SV=2	1	hf1_eb_18273_82_20032023.ScanId;v=1;d1=8623.8623.3	controllerType=0 controllerNumber=1 scan=8623	26.442
15858:3	1	P.LPPHPGHPGYINF.S			482.582	3	1445.73	1445.73	0	-1.1	19	Non	172.12	172.12	172.12	2.1	1125	>sp|P02817|AMELX_BOVIN Amelogenin, X isoform OS=Bos taurus OX=9913 GN=AMELX PE=1 SV=2	1	hf1_eb_18273_82_20032023.ScanId;v=1;d1=14628.14628.3	controllerType=0 controllerNumber=1 scan=14628	37.8048
15576:3	1	P.LPPHPGHPGYINF.S			482.581	3	1445.73	1445.73	0	-3.2	19	Non	229.27	229.27	229.27	2.36	1125	>sp|P02817|AMELX_BOVIN Amelogenin, X isoform OS=Bos taurus OX=9913 GN=AMELX PE=1 SV=2	1	hf1_eb_18273_82_20032023.ScanId;v=1;d1=14428.14428.3	controllerType=0 controllerNumber=1 scan=14428	37.4394
16163:3	1	P.LPPHPGHPGYINF.S			482.582	3	1445.73	1445.73	0	-0.6	19	Non	229.91	229.91	229.91	2.99	1125	>sp|P02817|AMELX_BOVIN Amelogenin, X isoform OS=Bos taurus OX=9913 GN=AMELX PE=1 SV=2	1	hf1_eb_18273_82_20032023.ScanId;v=1;d1=14835.14835.3	controllerType=0 controllerNumber=1 scan=14835	38.1511
16439:3	1	P.LPPHPGHPGYINF.S			482.582	3	1445.73	1445.73	0	-0.7	19	Non	241.08	241.08	241.08	4.33	1125	>sp|P02817|AMELX_BOVIN Amelogenin, X isoform OS=Bos taurus OX=9913 GN=AMELX PE=1 SV=2	1	hf1_eb_18273_82_20032023.ScanId;v=1;d1=15032.15032.3	controllerType=0 controllerNumber=1 scan=15032	38.4961
17000:3	1	P.LPPHPGHPGYINF.S			482.582	3	1445.73	1445.73	0	-1.3	19	Non	244.21	244.21	244.21	4.33	1125	>sp|P02817|AMELX_BOVIN Amelogenin, X isoform OS=Bos taurus OX=9913 GN=AMELX PE=1 SV=2	1	hf1_eb_18273_82_20032023.ScanId;v=1;d1=15438.15438.3	controllerType=0 controllerNumber=1 scan=15438	39.1955
16217:2	1	P.LPPHPGHPGYINF.S			723.369	2	1445.73	1445.73	0	-1.5	19	Non	526.15	478.77	478.77	6.54	1125	>sp|P02817|AMELX_BOVIN Amelogenin, X isoform OS=Bos taurus OX=9913 GN=AMELX PE=1 SV=2	1	hf1_eb_18273_82_20032023.ScanId;v=1;d1=14874.14874.2	controllerType=0 controllerNumber=1 scan=14874	38.2209
15923:2	1	P.LPPHPGHPGYINF.S			723.369	2	1445.73	1445.73	0	-1.8	19	Non	539.96	495.75	495.75	6.77	1125	>sp|P02817|AMELX_BOVIN Amelogenin, X isoform OS=Bos taurus OX=9913 GN=AMELX PE=1 SV=2	1	hf1_eb_18273_82_20032023.ScanId;v=1;d1=14673.14673.2	controllerType=0 controllerNumber=1 scan=14673	37.8799
16491:2	1	P.LPPHPGHPGYINF.S			723.37	2	1445.73	1445.73	0	-0.2	19	Non	574.6	531.55	531.55	7.22	1125	>sp|P02817|AMELX_BOVIN Amelogenin, X isoform OS=Bos taurus OX=9913 GN=AMELX PE=1 SV=2	1	hf1_eb_18273_82_20032023.ScanId;v=1;d1=15070.15070.2	controllerType=0 controllerNumber=1 scan=15070	38.5635
17064:2	1	P.LPPHPGHPGYINF.S			723.369	2	1445.73	1445.73	0	-1.9	19	Non	609.21	526.19	526.19	7.88	1125	>sp|P02817|AMELX_BOVIN Amelogenin, X isoform OS=Bos taurus OX=9913 GN=AMELX PE=1 SV=2	1	hf1_eb_18273_82_20032023.ScanId;v=1;d1=15483.15483.2	controllerType=0 controllerNumber=1 scan=15483	39.2668
37334:3	1	P.LPPHPGHPGYIN[+0.984]F.S		N[+1]	482.911	3	1446.72	1446.72	0	0.3	19	Non	61.4	61.4	61.4	0.77	1125	>sp|P02817|AMELX_BOVIN Amelogenin, X isoform OS=Bos taurus OX=9913 GN=AMELX PE=1 SV=2	1	hf1_eb_18273_82_20032023.ScanId;v=1;d1=31253.31253.6	controllerType=0 controllerNumber=1 scan=31253	73.422
37345:3	1	P.LPPHPGHPGYIN[+0.984]F.S		N[+1]	482.91	3	1446.72	1446.72	0	0.2	19	Non	75.35	75.35	75.35	0.77	1125	>sp|P02817|AMELX_BOVIN Amelogenin, X isoform OS=Bos taurus OX=9913 GN=AMELX PE=1 SV=2	1	hf1_eb_18273_82_20032023.ScanId;v=1;d1=31262.31262.6	controllerType=0 controllerNumber=1 scan=31262	73.4499
16141:2	1	P.LPPHP[+15.995]GHPGYINF.S		P[+16]	731.367	2	1461.73	1461.73	0	0.1	19	Non	102.04	102.04	2.72	1.39	1125	>sp|P02817|AMELX_BOVIN Amelogenin, X isoform OS=Bos taurus OX=9913 GN=AMELX PE=1 SV=2	1	hf1_eb_18273_82_20032023.ScanId;v=1;d1=14820.14820.3	controllerType=0 controllerNumber=1 scan=14820	38.1254
15602:2	1	P.LPPHPGHP[+15.995]GYINF.S		P[+16]	731.363	2	1461.72	1461.73	0	-6.3	19	Non	153.89	153.89	0	0.64	1125	>sp|P02817|AMELX_BOVIN Amelogenin, X isoform OS=Bos taurus OX=9913 GN=AMELX PE=1 SV=2	1	hf1_eb_18273_82_20032023.ScanId;v=1;d1=14446.14446.2	controllerType=0 controllerNumber=1 scan=14446	37.4717
17450:3	1	P.LPPHPGHPGYIN[+0.984]F.S		N[+1]	482.907	3	1446.71	1446.72	0	-7.1	19	Non	166.02	166.02	166.02	1.3	1125	>sp|P02817|AMELX_BOVIN Amelogenin, X isoform OS=Bos taurus OX=9913 GN=AMELX PE=1 SV=2	1	hf1_eb_18273_82_20032023.ScanId;v=1;d1=15776.15776.3	controllerType=0 controllerNumber=1 scan=15776	39.8055
19955:3	1	P.LPPHPGHPGYIN[+0.984]F.S		N[+1]	482.91	3	1446.72	1446.72	0	-0.4	19	Non	214.8	214.8	214.8	2.6	1125	>sp|P02817|AMELX_BOVIN Amelogenin, X isoform OS=Bos taurus OX=9913 GN=AMELX PE=1 SV=2	1	hf1_eb_18273_82_20032023.ScanId;v=1;d1=17627.17627.3	controllerType=0 controllerNumber=1 scan=17627	43.1377
20720:3	1	P.LPPHPGHPGYIN[+0.984]F.S		N[+1]	482.91	3	1446.71	1446.72	0	-1.1	19	Non	215.45	215.45	215.45	2.6	1125	>sp|P02817|AMELX_BOVIN Amelogenin, X isoform OS=Bos taurus OX=9913 GN=AMELX PE=1 SV=2	1	hf1_eb_18273_82_20032023.ScanId;v=1;d1=18227.18227.3	controllerType=0 controllerNumber=1 scan=18227	44.2713
17634:3	1	P.LPPHPGHPGYIN[+0.984]F.S		N[+1]	482.909	3	1446.71	1446.72	0	-2.2	19	Non	223.72	223.72	223.72	2.69	1125	>sp|P02817|AMELX_BOVIN Amelogenin, X isoform OS=Bos taurus OX=9913 GN=AMELX PE=1 SV=2	1	hf1_eb_18273_82_20032023.ScanId;v=1;d1=15911.15911.3	controllerType=0 controllerNumber=1 scan=15911	40.0414
14774:2	1	P.LPPHPGHP[+15.995]GYINF.S		P[+16]	731.366	2	1461.72	1461.73	0	-2	19	Non	247.43	247.43	0	4	1125	>sp|P02817|AMELX_BOVIN Amelogenin, X isoform OS=Bos taurus OX=9913 GN=AMELX PE=1 SV=2	1	hf1_eb_18273_82_20032023.ScanId;v=1;d1=13832.13832.2	controllerType=0 controllerNumber=1 scan=13832	36.3115
16966:2	1	P.LPPHPGHP[+15.995]GYINF.S		P[+16]	731.366	2	1461.73	1461.73	0	-1.1	19	Non	257.58	257.58	21.19	4.34	1125	>sp|P02817|AMELX_BOVIN Amelogenin, X isoform OS=Bos taurus OX=9913 GN=AMELX PE=1 SV=2	1	hf1_eb_18273_82_20032023.ScanId;v=1;d1=15413.15413.2	controllerType=0 controllerNumber=1 scan=15413	39.1513
15881:2	1	P.LPPHPGHP[+15.995]GYINF.S		P[+16]	731.367	2	1461.73	1461.73	0	-0.1	19	Non	262.22	262.22	0	4.81	1125	>sp|P02817|AMELX_BOVIN Amelogenin, X isoform OS=Bos taurus OX=9913 GN=AMELX PE=1 SV=2	1	hf1_eb_18273_82_20032023.ScanId;v=1;d1=14645.14645.2	controllerType=0 controllerNumber=1 scan=14645	37.8339
21666:3	1	P.LPPHPGHPGYIN[+0.984]F.S		N[+1]	482.91	3	1446.72	1446.72	0	-0.5	19	Non	275.39	275.39	275.39	4.33	1125	>sp|P02817|AMELX_BOVIN Amelogenin, X isoform OS=Bos taurus OX=9913 GN=AMELX PE=1 SV=2	1	hf1_eb_18273_82_20032023.ScanId;v=1;d1=18904.18904.3	controllerType=0 controllerNumber=1 scan=18904	45.506
18139:3	1	P.LPPHPGHPGYIN[+0.984]F.S		N[+1]	482.91	3	1446.72	1446.72	0	-0.3	19	Non	280.61	280.61	280.61	4.6	1125	>sp|P02817|AMELX_BOVIN Amelogenin, X isoform OS=Bos taurus OX=9913 GN=AMELX PE=1 SV=2	1	hf1_eb_18273_82_20032023.ScanId;v=1;d1=16293.16293.3	controllerType=0 controllerNumber=1 scan=16293	40.7333
18643:3	1	P.LPPHPGHPGYIN[+0.984]F.S		N[+1]	482.91	3	1446.72	1446.72	0	-0.6	19	Non	299	299	299	4.6	1125	>sp|P02817|AMELX_BOVIN Amelogenin, X isoform OS=Bos taurus OX=9913 GN=AMELX PE=1 SV=2	1	hf1_eb_18273_82_20032023.ScanId;v=1;d1=16673.16673.3	controllerType=0 controllerNumber=1 scan=16673	41.4145
19213:3	1	P.LPPHPGHPGYIN[+0.984]F.S		N[+1]	482.91	3	1446.72	1446.72	0	-0.3	19	Non	304.83	304.83	304.83	5.16	1125	>sp|P02817|AMELX_BOVIN Amelogenin, X isoform OS=Bos taurus OX=9913 GN=AMELX PE=1 SV=2	1	hf1_eb_18273_82_20032023.ScanId;v=1;d1=17070.17070.3	controllerType=0 controllerNumber=1 scan=17070	42.1144
20992:3	1	P.LPPHPGHPGYIN[+0.984]F.S		N[+1]	482.911	3	1446.72	1446.72	0	0.7	19	Non	317.05	317.05	317.05	5.14	1125	>sp|P02817|AMELX_BOVIN Amelogenin, X isoform OS=Bos taurus OX=9913 GN=AMELX PE=1 SV=2	1	hf1_eb_18273_82_20032023.ScanId;v=1;d1=18420.18420.3	controllerType=0 controllerNumber=1 scan=18420	44.6271
18929:3	1	P.LPPHPGHPGYIN[+0.984]F.S		N[+1]	482.91	3	1446.72	1446.72	0	0.1	19	Non	319.61	319.61	319.61	5.14	1125	>sp|P02817|AMELX_BOVIN Amelogenin, X isoform OS=Bos taurus OX=9913 GN=AMELX PE=1 SV=2	1	hf1_eb_18273_82_20032023.ScanId;v=1;d1=16873.16873.3	controllerType=0 controllerNumber=1 scan=16873	41.764
17882:3	1	P.LPPHPGHPGYIN[+0.984]F.S		N[+1]	482.91	3	1446.72	1446.72	0	-0.2	19	Non	331.46	331.46	331.46	5.23	1125	>sp|P02817|AMELX_BOVIN Amelogenin, X isoform OS=Bos taurus OX=9913 GN=AMELX PE=1 SV=2	1	hf1_eb_18273_82_20032023.ScanId;v=1;d1=16103.16103.3	controllerType=0 controllerNumber=1 scan=16103	40.3939
18395:3	1	P.LPPHPGHPGYIN[+0.984]F.S		N[+1]	482.91	3	1446.71	1446.72	0	-1.4	19	Non	336.52	336.52	336.52	5.23	1125	>sp|P02817|AMELX_BOVIN Amelogenin, X isoform OS=Bos taurus OX=9913 GN=AMELX PE=1 SV=2	1	hf1_eb_18273_82_20032023.ScanId;v=1;d1=16483.16483.3	controllerType=0 controllerNumber=1 scan=16483	41.0709
17001:3	1	P.LPPHPGHPGYIN[+0.984]F.S		N[+1]	482.91	3	1446.72	1446.72	0	-0.6	19	Non	369.32	369.32	369.32	5.94	1125	>sp|P02817|AMELX_BOVIN Amelogenin, X isoform OS=Bos taurus OX=9913 GN=AMELX PE=1 SV=2	1	hf1_eb_18273_82_20032023.ScanId;v=1;d1=15438.15438.3	controllerType=0 controllerNumber=1 scan=15438	39.1955
16732:3	1	P.LPPHPGHPGYIN[+0.984]F.S		N[+1]	482.909	3	1446.71	1446.72	0	-1.8	19	Non	376.22	376.22	376.22	5.94	1125	>sp|P02817|AMELX_BOVIN Amelogenin, X isoform OS=Bos taurus OX=9913 GN=AMELX PE=1 SV=2	1	hf1_eb_18273_82_20032023.ScanId;v=1;d1=15237.15237.3	controllerType=0 controllerNumber=1 scan=15237	38.8452
18896:2	1	P.LPPHPGHPGYIN[+0.984]F.S		N[+1]	723.862	2	1446.72	1446.72	0	-0.4	19	Non	516.81	455.2	455.2	6.68	1125	>sp|P02817|AMELX_BOVIN Amelogenin, X isoform OS=Bos taurus OX=9913 GN=AMELX PE=1 SV=2	1	hf1_eb_18273_82_20032023.ScanId;v=1;d1=16849.16849.2	controllerType=0 controllerNumber=1 scan=16849	41.7205
18605:2	1	P.LPPHPGHPGYIN[+0.984]F.S		N[+1]	723.861	2	1446.71	1446.72	0	-1.2	19	Non	572.74	411.98	411.98	7.64	1125	>sp|P02817|AMELX_BOVIN Amelogenin, X isoform OS=Bos taurus OX=9913 GN=AMELX PE=1 SV=2	1	hf1_eb_18273_82_20032023.ScanId;v=1;d1=16646.16646.2	controllerType=0 controllerNumber=1 scan=16646	41.3663
17583:2	1	P.LPPHPGHPGYIN[+0.984]F.S		N[+1]	723.86	2	1446.71	1446.72	0	-2.3	19	Non	608.11	567.63	567.63	7.88	1125	>sp|P02817|AMELX_BOVIN Amelogenin, X isoform OS=Bos taurus OX=9913 GN=AMELX PE=1 SV=2	1	hf1_eb_18273_82_20032023.ScanId;v=1;d1=15873.15873.2	controllerType=0 controllerNumber=1 scan=15873	39.9718
16594:2	1	P.LPPHPGHPGYIN[+0.984]F.S		N[+1]	723.859	2	1446.71	1446.72	0	-4	19	Non	617.94	539.81	539.81	7.02	1125	>sp|P02817|AMELX_BOVIN Amelogenin, X isoform OS=Bos taurus OX=9913 GN=AMELX PE=1 SV=2	1	hf1_eb_18273_82_20032023.ScanId;v=1;d1=15139.15139.2	controllerType=0 controllerNumber=1 scan=15139	38.6817
17830:2	1	P.LPPHPGHPGYIN[+0.984]F.S		N[+1]	723.86	2	1446.71	1446.72	0	-2.1	19	Non	623.11	585.93	585.93	8.29	1125	>sp|P02817|AMELX_BOVIN Amelogenin, X isoform OS=Bos taurus OX=9913 GN=AMELX PE=1 SV=2	1	hf1_eb_18273_82_20032023.ScanId;v=1;d1=16064.16064.2	controllerType=0 controllerNumber=1 scan=16064	40.3235
18353:2	1	P.LPPHPGHPGYIN[+0.984]F.S		N[+1]	723.861	2	1446.71	1446.72	0	-1.9	19	Non	652.46	523.66	523.66	9.29	1125	>sp|P02817|AMELX_BOVIN Amelogenin, X isoform OS=Bos taurus OX=9913 GN=AMELX PE=1 SV=2	1	hf1_eb_18273_82_20032023.ScanId;v=1;d1=16450.16450.2	controllerType=0 controllerNumber=1 scan=16450	41.009
18087:2	1	P.LPPHPGHPGYIN[+0.984]F.S		N[+1]	723.861	2	1446.71	1446.72	0	-1.4	19	Non	670.95	620.67	620.67	9.64	1125	>sp|P02817|AMELX_BOVIN Amelogenin, X isoform OS=Bos taurus OX=9913 GN=AMELX PE=1 SV=2	1	hf1_eb_18273_82_20032023.ScanId;v=1;d1=16254.16254.2	controllerType=0 controllerNumber=1 scan=16254	40.6613
16868:2	1	P.LPPHPGHPGYIN[+0.984]F.S		N[+1]	723.86	2	1446.71	1446.72	0	-2.4	19	Non	674.2	619.62	619.62	9.29	1125	>sp|P02817|AMELX_BOVIN Amelogenin, X isoform OS=Bos taurus OX=9913 GN=AMELX PE=1 SV=2	1	hf1_eb_18273_82_20032023.ScanId;v=1;d1=15338.15338.2	controllerType=0 controllerNumber=1 scan=15338	39.0216
23111:2	1	P.LP[+31.990]PHPGHPGYIN[+0.984]F.S		N[+1], P[+32]	739.857	2	1478.71	1478.71	0	-0.3	19	Non	48.71	48.71	4.25	0.65	1125	>sp|P02817|AMELX_BOVIN Amelogenin, X isoform OS=Bos taurus OX=9913 GN=AMELX PE=1 SV=2	1	hf1_eb_18273_82_20032023.ScanId;v=1;d1=19939.19939.3	controllerType=0 controllerNumber=1 scan=19939	47.3625
17966:3	1	P.LPPHPGHP[+15.995]GYIN[+0.984]F.S		N[+1], P[+16]	488.241	3	1462.71	1462.71	0	-1.8	19	Non	97.48	97.48	0	1.05	1125	>sp|P02817|AMELX_BOVIN Amelogenin, X isoform OS=Bos taurus OX=9913 GN=AMELX PE=1 SV=2	1	hf1_eb_18273_82_20032023.ScanId;v=1;d1=16165.16165.3	controllerType=0 controllerNumber=1 scan=16165	40.4997
17476:3	1	P.LPPHP[+15.995]GHPGYIN[+0.984]F.S		N[+1], P[+16]	488.241	3	1462.71	1462.71	0	-2.1	19	Non	122.1	122.1	0	0.57	1125	>sp|P02817|AMELX_BOVIN Amelogenin, X isoform OS=Bos taurus OX=9913 GN=AMELX PE=1 SV=2	1	hf1_eb_18273_82_20032023.ScanId;v=1;d1=15793.15793.3	controllerType=0 controllerNumber=1 scan=15793	39.8364
17216:3	1	P.LPPHP[+15.995]GHPGYIN[+0.984]F.S		N[+1], P[+16]	488.241	3	1462.71	1462.71	0	-2	19	Non	154.57	154.57	0	0.95	1125	>sp|P02817|AMELX_BOVIN Amelogenin, X isoform OS=Bos taurus OX=9913 GN=AMELX PE=1 SV=2	1	hf1_eb_18273_82_20032023.ScanId;v=1;d1=15598.15598.3	controllerType=0 controllerNumber=1 scan=15598	39.4891
21639:2	1	P.LPP[+31.990]HPGHPGYIN[+0.984]F.S		N[+1], P[+32]	739.858	2	1478.71	1478.71	0	1.7	19	Non	163.24	163.24	5.96	2.77	1125	>sp|P02817|AMELX_BOVIN Amelogenin, X isoform OS=Bos taurus OX=9913 GN=AMELX PE=1 SV=2	1	hf1_eb_18273_82_20032023.ScanId;v=1;d1=18883.18883.2	controllerType=0 controllerNumber=1 scan=18883	45.4641
21657:2	1	P.LPPHP[+31.990]GHPGYIN[+0.984]F.S		N[+1], P[+32]	739.852	2	1478.7	1478.71	0	-5.7	19	Non	174.63	174.63	23.67	2.1	1125	>sp|P02817|AMELX_BOVIN Amelogenin, X isoform OS=Bos taurus OX=9913 GN=AMELX PE=1 SV=2	1	hf1_eb_18273_82_20032023.ScanId;v=1;d1=18896.18896.2	controllerType=0 controllerNumber=1 scan=18896	45.4884
21369:2	1	P.LPPHP[+31.990]GHPGYIN[+0.984]F.S		N[+1], P[+32]	739.857	2	1478.71	1478.71	0	0.2	19	Non	213.2	213.2	17.76	3	1125	>sp|P02817|AMELX_BOVIN Amelogenin, X isoform OS=Bos taurus OX=9913 GN=AMELX PE=1 SV=2	1	hf1_eb_18273_82_20032023.ScanId;v=1;d1=18693.18693.2	controllerType=0 controllerNumber=1 scan=18693	45.1201
17568:3	1	P.LP[+31.990]PHPGHPGYIN[+0.984]F.S		N[+1], P[+32]	493.573	3	1478.7	1478.71	0	-2	19	Non	227.83	196.04	7.98	2.23	1125	>sp|P02817|AMELX_BOVIN Amelogenin, X isoform OS=Bos taurus OX=9913 GN=AMELX PE=1 SV=2	1	hf1_eb_18273_82_20032023.ScanId;v=1;d1=15860.15860.3	controllerType=0 controllerNumber=1 scan=15860	39.9482
21023:2	1	P.LPPHP[+31.990]GHPGYIN[+0.984]F.S		N[+1], P[+32]	739.855	2	1478.7	1478.71	0	-2.8	19	Non	248.94	248.94	4.51	4.46	1125	>sp|P02817|AMELX_BOVIN Amelogenin, X isoform OS=Bos taurus OX=9913 GN=AMELX PE=1 SV=2	1	hf1_eb_18273_82_20032023.ScanId;v=1;d1=18442.18442.2	controllerType=0 controllerNumber=1 scan=18442	44.6645
15736:3	1	P.LPPHPGHP[+15.995]GYIN[+0.984]F.S		N[+1], P[+16]	488.241	3	1462.71	1462.71	0	-1.3	19	Non	265.8	265.8	9.28	3.86	1125	>sp|P02817|AMELX_BOVIN Amelogenin, X isoform OS=Bos taurus OX=9913 GN=AMELX PE=1 SV=2	1	hf1_eb_18273_82_20032023.ScanId;v=1;d1=14545.14545.3	controllerType=0 controllerNumber=1 scan=14545	37.6572
23210:2	1	P.LPP[+15.995]HPGHPGYIN[+0.984]F.S		N[+1], P[+16]	731.859	2	1462.71	1462.71	0	-0.7	19	Non	332.22	332.22	0	5.72	1125	>sp|P02817|AMELX_BOVIN Amelogenin, X isoform OS=Bos taurus OX=9913 GN=AMELX PE=1 SV=2	1	hf1_eb_18273_82_20032023.ScanId;v=1;d1=20013.20013.2	controllerType=0 controllerNumber=1 scan=20013	47.5035
17231:2	1	P.LPPHPGHP[+15.995]GYIN[+0.984]F.S		N[+1], P[+16]	731.859	2	1462.71	1462.71	0	-0.9	19	Non	336.14	315.17	0	5.05	1125	>sp|P02817|AMELX_BOVIN Amelogenin, X isoform OS=Bos taurus OX=9913 GN=AMELX PE=1 SV=2	1	hf1_eb_18273_82_20032023.ScanId;v=1;d1=15609.15609.2	controllerType=0 controllerNumber=1 scan=15609	39.508
15622:2	1	P.LPPHPGHP[+15.995]GYIN[+0.984]F.S		N[+1], P[+16]	731.858	2	1462.71	1462.71	0	-1.5	19	Non	342.7	342.7	0	5.72	1125	>sp|P02817|AMELX_BOVIN Amelogenin, X isoform OS=Bos taurus OX=9913 GN=AMELX PE=1 SV=2	1	hf1_eb_18273_82_20032023.ScanId;v=1;d1=14460.14460.2	controllerType=0 controllerNumber=1 scan=14460	37.4949
22985:2	1	P.LPP[+31.990]HPGHPGYIN[+0.984]F.S		N[+1], P[+32]	739.857	2	1478.71	1478.71	0	0	19	Non	370.78	370.78	3.44	6.43	1125	>sp|P02817|AMELX_BOVIN Amelogenin, X isoform OS=Bos taurus OX=9913 GN=AMELX PE=1 SV=2	1	hf1_eb_18273_82_20032023.ScanId;v=1;d1=19853.19853.2	controllerType=0 controllerNumber=1 scan=19853	47.2076
16405:2	1	P.LPPHPGHP[+15.995]GYIN[+0.984]F.S		N[+1], P[+16]	731.859	2	1462.71	1462.71	0	-0.7	19	Non	408.75	408.75	0	6.53	1125	>sp|P02817|AMELX_BOVIN Amelogenin, X isoform OS=Bos taurus OX=9913 GN=AMELX PE=1 SV=2	1	hf1_eb_18273_82_20032023.ScanId;v=1;d1=15006.15006.2	controllerType=0 controllerNumber=1 scan=15006	38.4509
22714:2	1	P.LPPHP[+31.990]GHPGYIN[+0.984]F.S		N[+1], P[+32]	739.857	2	1478.71	1478.71	0	0.1	19	Non	542.24	521.18	56.28	6.75	1125	>sp|P02817|AMELX_BOVIN Amelogenin, X isoform OS=Bos taurus OX=9913 GN=AMELX PE=1 SV=2	1	hf1_eb_18273_82_20032023.ScanId;v=1;d1=19666.19666.2	controllerType=0 controllerNumber=1 scan=19666	46.8652
16967:2	1	P.LPPHPGHP[+15.995]GYIN[+0.984]F.S		N[+1], P[+16]	731.858	2	1462.71	1462.71	0	-2.1	19	Non	569.25	520.02	21.19	6.88	1125	>sp|P02817|AMELX_BOVIN Amelogenin, X isoform OS=Bos taurus OX=9913 GN=AMELX PE=1 SV=2	1	hf1_eb_18273_82_20032023.ScanId;v=1;d1=15413.15413.2	controllerType=0 controllerNumber=1 scan=15413	39.1513
16688:2	1	P.LPPHPGHP[+15.995]GYIN[+0.984]F.S		N[+1], P[+16]	731.858	2	1462.71	1462.71	0	-1.4	19	Non	605	551.46	0	8.64	1125	>sp|P02817|AMELX_BOVIN Amelogenin, X isoform OS=Bos taurus OX=9913 GN=AMELX PE=1 SV=2	1	hf1_eb_18273_82_20032023.ScanId;v=1;d1=15208.15208.2	controllerType=0 controllerNumber=1 scan=15208	38.796
27626:2	1	P.LPP[+31.990]H[+15.995]PGHPGYIN[+0.984]F.S		H[+16], N[+1], P[+32]	747.854	2	1494.7	1494.7	0	-0.7	19	Non	70.5	70.5	34.06	1.13	1125	>sp|P02817|AMELX_BOVIN Amelogenin, X isoform OS=Bos taurus OX=9913 GN=AMELX PE=1 SV=2	1	hf1_eb_18273_82_20032023.ScanId;v=1;d1=23139.23139.2	controllerType=0 controllerNumber=1 scan=23139	53.1953
24486:2	1	P.LPPHP[+31.990]GH[+15.995]PGYIN[+0.984]F.S		H[+16], N[+1], P[+32]	747.853	2	1494.7	1494.7	0	-1.8	19	Non	80.05	80.05	23.48	1.13	1125	>sp|P02817|AMELX_BOVIN Amelogenin, X isoform OS=Bos taurus OX=9913 GN=AMELX PE=1 SV=2	1	hf1_eb_18273_82_20032023.ScanId;v=1;d1=20933.20933.2	controllerType=0 controllerNumber=1 scan=20933	49.1798
22446:2	1	P.LPP[+31.990]H[+15.995]PGHPGYIN[+0.984]F.S		H[+16], N[+1], P[+32]	747.853	2	1494.7	1494.7	0	-1.3	19	Non	113.84	113.84	58.47	1.39	1125	>sp|P02817|AMELX_BOVIN Amelogenin, X isoform OS=Bos taurus OX=9913 GN=AMELX PE=1 SV=2	1	hf1_eb_18273_82_20032023.ScanId;v=1;d1=19471.19471.2	controllerType=0 controllerNumber=1 scan=19471	46.4963
14355:3	1	P.LPPHPGHPGYINFS.Y			511.593	3	1532.76	1532.76	0	-0.5	19	Non	212.76	212.76	212.76	2.6	1125	>sp|P02817|AMELX_BOVIN Amelogenin, X isoform OS=Bos taurus OX=9913 GN=AMELX PE=1 SV=2	1	hf1_eb_18273_82_20032023.ScanId;v=1;d1=13522.13522.3	controllerType=0 controllerNumber=1 scan=13522	35.7297
14112:3	1	P.LPPHPGHPGYINFS.Y			511.593	3	1532.76	1532.76	0	-0.1	19	Non	223.83	223.83	223.83	2.6	1125	>sp|P02817|AMELX_BOVIN Amelogenin, X isoform OS=Bos taurus OX=9913 GN=AMELX PE=1 SV=2	1	hf1_eb_18273_82_20032023.ScanId;v=1;d1=13343.13343.3	controllerType=0 controllerNumber=1 scan=13343	35.3915
17112:3	1	P.LPPHPGHPGYIN[+0.984]FS.Y		N[+1]	511.92	3	1533.74	1533.75	0	-2.3	19	Non	173.09	168.49	168.49	2.23	1125	>sp|P02817|AMELX_BOVIN Amelogenin, X isoform OS=Bos taurus OX=9913 GN=AMELX PE=1 SV=2	1	hf1_eb_18273_82_20032023.ScanId;v=1;d1=15518.15518.3	controllerType=0 controllerNumber=1 scan=15518	39.3335
16279:3	1	P.LPPHPGHPGYIN[+0.984]FS.Y		N[+1]	511.92	3	1533.75	1533.75	0	-1.5	19	Non	181.3	181.3	181.3	2.42	1125	>sp|P02817|AMELX_BOVIN Amelogenin, X isoform OS=Bos taurus OX=9913 GN=AMELX PE=1 SV=2	1	hf1_eb_18273_82_20032023.ScanId;v=1;d1=14916.14916.3	controllerType=0 controllerNumber=1 scan=14916	38.2935
18707:3	1	P.LPPHPGHPGYINFS[+79.966].Y		S[+80]	538.248	3	1612.73	1612.73	0	-0.5	19	Non	188.32	188.32	169.89	2.42	1125	>sp|P02817|AMELX_BOVIN Amelogenin, X isoform OS=Bos taurus OX=9913 GN=AMELX PE=1 SV=2	1	hf1_eb_18273_82_20032023.ScanId;v=1;d1=16722.16722.3	controllerType=0 controllerNumber=1 scan=16722	41.4992
16556:3	1	P.LPPHPGHPGYIN[+0.984]FS.Y		N[+1]	511.921	3	1533.75	1533.75	0	-1	19	Non	197.96	197.96	197.96	2.42	1125	>sp|P02817|AMELX_BOVIN Amelogenin, X isoform OS=Bos taurus OX=9913 GN=AMELX PE=1 SV=2	1	hf1_eb_18273_82_20032023.ScanId;v=1;d1=15114.15114.3	controllerType=0 controllerNumber=1 scan=15114	38.6412
18438:3	1	P.LPPHPGHPGYINFS[+79.966].Y		S[+80]	538.248	3	1612.73	1612.73	0	-0.2	19	Non	217.15	217.15	217.15	2.6	1125	>sp|P02817|AMELX_BOVIN Amelogenin, X isoform OS=Bos taurus OX=9913 GN=AMELX PE=1 SV=2	1	hf1_eb_18273_82_20032023.ScanId;v=1;d1=16516.16516.3	controllerType=0 controllerNumber=1 scan=16516	41.1308
17910:3	1	P.LPPHPGHPGYINFS[+79.966].Y		S[+80]	538.247	3	1612.73	1612.73	0	-1.9	19	Non	226.36	226.36	216.65	2.36	1125	>sp|P02817|AMELX_BOVIN Amelogenin, X isoform OS=Bos taurus OX=9913 GN=AMELX PE=1 SV=2	1	hf1_eb_18273_82_20032023.ScanId;v=1;d1=16126.16126.3	controllerType=0 controllerNumber=1 scan=16126	40.4334
16849:3	1	P.LPPHPGHPGYIN[+0.984]FS.Y		N[+1]	511.92	3	1533.75	1533.75	0	-2	19	Non	236.65	149.35	149.35	2.16	1125	>sp|P02817|AMELX_BOVIN Amelogenin, X isoform OS=Bos taurus OX=9913 GN=AMELX PE=1 SV=2	1	hf1_eb_18273_82_20032023.ScanId;v=1;d1=15324.15324.3	controllerType=0 controllerNumber=1 scan=15324	38.9951
18184:3	1	P.LPPHPGHPGYINFS[+79.966].Y		S[+80]	538.248	3	1612.73	1612.73	0	-1.2	19	Non	251.5	251.5	251.5	4.33	1125	>sp|P02817|AMELX_BOVIN Amelogenin, X isoform OS=Bos taurus OX=9913 GN=AMELX PE=1 SV=2	1	hf1_eb_18273_82_20032023.ScanId;v=1;d1=16325.16325.3	controllerType=0 controllerNumber=1 scan=16325	40.7883
17031:2	1	P.LPPHPGHPGYIN[+0.984]FS.Y		N[+1]	767.376	2	1533.74	1533.75	0	-2.3	19	Non	334.29	304.53	304.53	4.71	1125	>sp|P02817|AMELX_BOVIN Amelogenin, X isoform OS=Bos taurus OX=9913 GN=AMELX PE=1 SV=2	1	hf1_eb_18273_82_20032023.ScanId;v=1;d1=15457.15457.2	controllerType=0 controllerNumber=1 scan=15457	39.2236
16525:2	1	P.LPPHPGHPGYIN[+0.984]FS.Y		N[+1]	767.38	2	1533.75	1533.75	0	2.9	19	Non	345.76	345.76	345.76	4.02	1125	>sp|P02817|AMELX_BOVIN Amelogenin, X isoform OS=Bos taurus OX=9913 GN=AMELX PE=1 SV=2	1	hf1_eb_18273_82_20032023.ScanId;v=1;d1=15093.15093.3	controllerType=0 controllerNumber=1 scan=15093	38.6038
16740:2	1	P.LPPHPGHPGYIN[+0.984]FS.Y		N[+1]	767.377	2	1533.75	1533.75	0	-1.4	19	Non	362.58	362.58	362.58	5.99	1125	>sp|P02817|AMELX_BOVIN Amelogenin, X isoform OS=Bos taurus OX=9913 GN=AMELX PE=1 SV=2	1	hf1_eb_18273_82_20032023.ScanId;v=1;d1=15244.15244.2	controllerType=0 controllerNumber=1 scan=15244	38.857
18767:2	1	P.LPPHPGHPGYINFS[+79.966].Y		S[+80]	806.869	2	1612.73	1612.73	0	0.5	19	Non	412.39	369.4	255.46	6.4	1125	>sp|P02817|AMELX_BOVIN Amelogenin, X isoform OS=Bos taurus OX=9913 GN=AMELX PE=1 SV=2	1	hf1_eb_18273_82_20032023.ScanId;v=1;d1=16765.16765.2	controllerType=0 controllerNumber=1 scan=16765	41.5772
17844:2	1	P.LPPHPGHPGYINFS[+79.966].Y		S[+80]	806.868	2	1612.73	1612.73	0	-1.2	19	Non	423.26	386.15	277.43	6.53	1125	>sp|P02817|AMELX_BOVIN Amelogenin, X isoform OS=Bos taurus OX=9913 GN=AMELX PE=1 SV=2	1	hf1_eb_18273_82_20032023.ScanId;v=1;d1=16074.16074.2	controllerType=0 controllerNumber=1 scan=16074	40.3403
18306:2	1	P.LPPHPGHPGYINFS[+79.966].Y		S[+80]	806.869	2	1612.73	1612.73	0	0.5	19	Non	475.1	379.51	331.28	7.07	1125	>sp|P02817|AMELX_BOVIN Amelogenin, X isoform OS=Bos taurus OX=9913 GN=AMELX PE=1 SV=2	1	hf1_eb_18273_82_20032023.ScanId;v=1;d1=16413.16413.3	controllerType=0 controllerNumber=1 scan=16413	40.9427
16318:2	1	P.LPPHPGHPGYIN[+0.984]FS.Y		N[+1]	767.376	2	1533.75	1533.75	0	-1.9	19	Non	504.56	448.42	448.42	6.1	1125	>sp|P02817|AMELX_BOVIN Amelogenin, X isoform OS=Bos taurus OX=9913 GN=AMELX PE=1 SV=2	1	hf1_eb_18273_82_20032023.ScanId;v=1;d1=14946.14946.2	controllerType=0 controllerNumber=1 scan=14946	38.3484
18178:2	1	P.LPPHPGHPGYINFS[+79.966].Y		S[+80]	806.868	2	1612.73	1612.73	0	-1.8	19	Non	577.77	512.72	362.85	7.29	1125	>sp|P02817|AMELX_BOVIN Amelogenin, X isoform OS=Bos taurus OX=9913 GN=AMELX PE=1 SV=2	1	hf1_eb_18273_82_20032023.ScanId;v=1;d1=16320.16320.2	controllerType=0 controllerNumber=1 scan=16320	40.7783
19928:3	1	P.LPPHPGHPGYIN[+0.984]FS[+79.966].Y		N[+1], S[+80]	538.576	3	1613.71	1613.71	0	-1.1	19	Non	76.62	76.62	76.62	0.79	1125	>sp|P02817|AMELX_BOVIN Amelogenin, X isoform OS=Bos taurus OX=9913 GN=AMELX PE=1 SV=2	1	hf1_eb_18273_82_20032023.ScanId;v=1;d1=17610.17610.3	controllerType=0 controllerNumber=1 scan=17610	43.1072
19152:3	1	P.LPPHPGHPGYIN[+0.984]FS[+79.966].Y		N[+1], S[+80]	538.576	3	1613.71	1613.71	0	-1	19	Non	209.3	209.3	209.3	2.99	1125	>sp|P02817|AMELX_BOVIN Amelogenin, X isoform OS=Bos taurus OX=9913 GN=AMELX PE=1 SV=2	1	hf1_eb_18273_82_20032023.ScanId;v=1;d1=17025.17025.3	controllerType=0 controllerNumber=1 scan=17025	42.033
19905:3	1	P.LPPHPGHPGYIN[+0.984]FS[+79.966].Y		N[+1], S[+80]	538.576	3	1613.71	1613.71	0	-0.8	19	Non	213.39	200.94	200.94	2.99	1125	>sp|P02817|AMELX_BOVIN Amelogenin, X isoform OS=Bos taurus OX=9913 GN=AMELX PE=1 SV=2	1	hf1_eb_18273_82_20032023.ScanId;v=1;d1=17592.17592.3	controllerType=0 controllerNumber=1 scan=17592	43.0728
20241:2	1	P.LPPHPGHPGYIN[+0.984]FS[+79.966].Y		N[+1], S[+80]	807.359	2	1613.71	1613.71	0	-2.5	19	Non	218.51	218.51	174.99	3.12	1125	>sp|P02817|AMELX_BOVIN Amelogenin, X isoform OS=Bos taurus OX=9913 GN=AMELX PE=1 SV=2	1	hf1_eb_18273_82_20032023.ScanId;v=1;d1=17860.17860.2	controllerType=0 controllerNumber=1 scan=17860	43.5792
19395:3	1	P.LPPHPGHPGYIN[+0.984]FS[+79.966].Y		N[+1], S[+80]	538.576	3	1613.71	1613.71	0	-0.4	19	Non	235.34	229.31	229.31	2.99	1125	>sp|P02817|AMELX_BOVIN Amelogenin, X isoform OS=Bos taurus OX=9913 GN=AMELX PE=1 SV=2	1	hf1_eb_18273_82_20032023.ScanId;v=1;d1=17211.17211.3	controllerType=0 controllerNumber=1 scan=17211	42.3772
19640:3	1	P.LPPHPGHPGYIN[+0.984]FS[+79.966].Y		N[+1], S[+80]	538.576	3	1613.71	1613.71	0	-1.7	19	Non	271.52	240.06	240.06	4.72	1125	>sp|P02817|AMELX_BOVIN Amelogenin, X isoform OS=Bos taurus OX=9913 GN=AMELX PE=1 SV=2	1	hf1_eb_18273_82_20032023.ScanId;v=1;d1=17398.17398.3	controllerType=0 controllerNumber=1 scan=17398	42.7276
18768:2	1	P.LPPHPGHPGYIN[+0.984]FS[+79.966].Y		N[+1], S[+80]	807.361	2	1613.71	1613.71	0	-0.3	19	Non	519.71	514.74	295.38	7.1	1125	>sp|P02817|AMELX_BOVIN Amelogenin, X isoform OS=Bos taurus OX=9913 GN=AMELX PE=1 SV=2	1	hf1_eb_18273_82_20032023.ScanId;v=1;d1=16765.16765.2	controllerType=0 controllerNumber=1 scan=16765	41.5772
19061:2	1	P.LPPHPGHPGYIN[+0.984]FS[+79.966].Y		N[+1], S[+80]	807.36	2	1613.71	1613.71	0	-1.5	19	Non	528.51	486.09	361.69	7.18	1125	>sp|P02817|AMELX_BOVIN Amelogenin, X isoform OS=Bos taurus OX=9913 GN=AMELX PE=1 SV=2	1	hf1_eb_18273_82_20032023.ScanId;v=1;d1=16966.16966.2	controllerType=0 controllerNumber=1 scan=16966	41.9312
18498:2	1	P.LPPHPGHPGYIN[+0.984]FS[+79.966].Y		N[+1], S[+80]	807.362	2	1613.72	1613.71	0	1	19	Non	622.56	622.56	392.11	8.63	1125	>sp|P02817|AMELX_BOVIN Amelogenin, X isoform OS=Bos taurus OX=9913 GN=AMELX PE=1 SV=2	1	hf1_eb_18273_82_20032023.ScanId;v=1;d1=16566.16566.2	controllerType=0 controllerNumber=1 scan=16566	41.2217
20069:2	1	P.LPPHPGHPGYIN[+0.984]FS[+79.966].Y		N[+1], S[+80]	807.36	2	1613.71	1613.71	0	-1.5	19	Non	681.64	621.93	427.65	9.64	1125	>sp|P02817|AMELX_BOVIN Amelogenin, X isoform OS=Bos taurus OX=9913 GN=AMELX PE=1 SV=2	1	hf1_eb_18273_82_20032023.ScanId;v=1;d1=17717.17717.2	controllerType=0 controllerNumber=1 scan=17717	43.3099
19832:2	1	P.LPPHPGHPGYIN[+0.984]FS[+79.966].Y		N[+1], S[+80]	807.361	2	1613.71	1613.71	0	-0.3	19	Non	748.61	716.56	517.34	10.64	1125	>sp|P02817|AMELX_BOVIN Amelogenin, X isoform OS=Bos taurus OX=9913 GN=AMELX PE=1 SV=2	1	hf1_eb_18273_82_20032023.ScanId;v=1;d1=17534.17534.2	controllerType=0 controllerNumber=1 scan=17534	42.9699
19563:2	1	P.LPPHPGHPGYIN[+0.984]FS[+79.966].Y		N[+1], S[+80]	807.359	2	1613.71	1613.71	0	-2.2	19	Non	764.31	706.85	511.31	11.29	1125	>sp|P02817|AMELX_BOVIN Amelogenin, X isoform OS=Bos taurus OX=9913 GN=AMELX PE=1 SV=2	1	hf1_eb_18273_82_20032023.ScanId;v=1;d1=17339.17339.2	controllerType=0 controllerNumber=1 scan=17339	42.6145
19330:2	1	P.LPPHPGHPGYIN[+0.984]FS[+79.966].Y		N[+1], S[+80]	807.361	2	1613.71	1613.71	0	-0.7	19	Non	778.59	755.76	499.77	11.64	1125	>sp|P02817|AMELX_BOVIN Amelogenin, X isoform OS=Bos taurus OX=9913 GN=AMELX PE=1 SV=2	1	hf1_eb_18273_82_20032023.ScanId;v=1;d1=17158.17158.2	controllerType=0 controllerNumber=1 scan=17158	42.2754
18389:2	1	P.LPPHPGHP[+15.995]GYIN[+0.984]FS[+79.966].Y		N[+1], P[+16], S[+80]	815.357	2	1629.71	1629.71	0	-2	19	Non	103.9	103.9	0	2.1	1125	>sp|P02817|AMELX_BOVIN Amelogenin, X isoform OS=Bos taurus OX=9913 GN=AMELX PE=1 SV=2	1	hf1_eb_18273_82_20032023.ScanId;v=1;d1=16475.16475.2	controllerType=0 controllerNumber=1 scan=16475	41.0534
18448:2	1	P.LPPHPGHPGY[+15.995]IN[+0.984]FS[+79.966].Y		N[+1], S[+80], Y[+16]	815.359	2	1629.71	1629.71	0	1.1	19	Non	249.96	249.96	0	4.8	1125	>sp|P02817|AMELX_BOVIN Amelogenin, X isoform OS=Bos taurus OX=9913 GN=AMELX PE=1 SV=2	1	hf1_eb_18273_82_20032023.ScanId;v=1;d1=16523.16523.2	controllerType=0 controllerNumber=1 scan=16523	41.144
18690:2	1	P.LPPHPGHPGY[+15.995]IN[+0.984]FS[+79.966].Y		N[+1], S[+80], Y[+16]	815.36	2	1629.71	1629.71	0	1.4	19	Non	256.24	256.24	0.66	4.8	1125	>sp|P02817|AMELX_BOVIN Amelogenin, X isoform OS=Bos taurus OX=9913 GN=AMELX PE=1 SV=2	1	hf1_eb_18273_82_20032023.ScanId;v=1;d1=16711.16711.2	controllerType=0 controllerNumber=1 scan=16711	41.4818
18177:2	1	P.LPPHPGHP[+15.995]GYIN[+0.984]FS[+79.966].Y		N[+1], P[+16], S[+80]	815.357	2	1629.71	1629.71	0	-1.5	19	Non	273.74	268.25	0	4.81	1125	>sp|P02817|AMELX_BOVIN Amelogenin, X isoform OS=Bos taurus OX=9913 GN=AMELX PE=1 SV=2	1	hf1_eb_18273_82_20032023.ScanId;v=1;d1=16319.16319.2	controllerType=0 controllerNumber=1 scan=16319	40.7771
19733:2	1	P.LPPHPGHPGYINFSY.E			848.416	2	1695.83	1695.83	0	-1.4	19	Non	35.91	15.16	15.16	0.61	1125	>sp|P02817|AMELX_BOVIN Amelogenin, X isoform OS=Bos taurus OX=9913 GN=AMELX PE=1 SV=2	1	hf1_eb_18273_82_20032023.ScanId;v=1;d1=17465.17465.2	controllerType=0 controllerNumber=1 scan=17465	42.8515
22275:2	1	P.LPPHPGHPGYINFS[+79.966]Y.E		S[+80]	888.4	2	1775.79	1775.79	0	-0.8	19	Non	81.27	81.27	81.27	0.86	1125	>sp|P02817|AMELX_BOVIN Amelogenin, X isoform OS=Bos taurus OX=9913 GN=AMELX PE=1 SV=2	1	hf1_eb_18273_82_20032023.ScanId;v=1;d1=19352.19352.2	controllerType=0 controllerNumber=1 scan=19352	46.2904
20581:3	1	P.LPPHPGHPGYIN[+0.984]FSY.E		N[+1]	566.275	3	1696.81	1696.81	0	0	19	Non	115.67	115.67	115.67	0.71	1125	>sp|P02817|AMELX_BOVIN Amelogenin, X isoform OS=Bos taurus OX=9913 GN=AMELX PE=1 SV=2	1	hf1_eb_18273_82_20032023.ScanId;v=1;d1=18121.18121.3	controllerType=0 controllerNumber=1 scan=18121	44.0731
20334:3	1	P.LPPHPGHPGYIN[+0.984]FSY.E		N[+1]	566.274	3	1696.81	1696.81	0	-2.7	19	Non	142.55	142.55	142.55	1.11	1125	>sp|P02817|AMELX_BOVIN Amelogenin, X isoform OS=Bos taurus OX=9913 GN=AMELX PE=1 SV=2	1	hf1_eb_18273_82_20032023.ScanId;v=1;d1=17938.17938.3	controllerType=0 controllerNumber=1 scan=17938	43.7255
21994:2	1	P.LPPHPGHPGYINFS[+79.966]Y.E		S[+80]	888.401	2	1775.79	1775.79	0	0.2	19	Non	221.54	221.54	219.83	3.23	1125	>sp|P02817|AMELX_BOVIN Amelogenin, X isoform OS=Bos taurus OX=9913 GN=AMELX PE=1 SV=2	1	hf1_eb_18273_82_20032023.ScanId;v=1;d1=19150.19150.2	controllerType=0 controllerNumber=1 scan=19150	45.9357
26749:2	1	P.LPPHPGHPGYINF[+31.990]SY[+31.990].E		F[+32], Y[+32]	880.406	2	1759.8	1759.81	0	-1.8	19	Non	19.26	2.92	2.92	0.62	1125	>sp|P02817|AMELX_BOVIN Amelogenin, X isoform OS=Bos taurus OX=9913 GN=AMELX PE=1 SV=2	1	hf1_eb_18273_82_20032023.ScanId;v=1;d1=22543.22543.2	controllerType=0 controllerNumber=1 scan=22543	52.1225
23192:3	1	P.LPPHPGHPGYIN[+0.984]FS[+79.966]Y.E		N[+1], S[+80]	592.93	3	1776.78	1776.78	0	-1.1	19	Non	101.64	101.64	101.64	1.22	1125	>sp|P02817|AMELX_BOVIN Amelogenin, X isoform OS=Bos taurus OX=9913 GN=AMELX PE=1 SV=2	1	hf1_eb_18273_82_20032023.ScanId;v=1;d1=19997.19997.3	controllerType=0 controllerNumber=1 scan=19997	47.4712
23450:3	1	P.LPPHPGHPGYIN[+0.984]FS[+79.966]Y.E		N[+1], S[+80]	592.93	3	1776.78	1776.78	0	-1.2	19	Non	215.45	215.45	215.45	3.22	1125	>sp|P02817|AMELX_BOVIN Amelogenin, X isoform OS=Bos taurus OX=9913 GN=AMELX PE=1 SV=2	1	hf1_eb_18273_82_20032023.ScanId;v=1;d1=20183.20183.3	controllerType=0 controllerNumber=1 scan=20183	47.8233
23628:2	1	P.LPPHPGHPGYIN[+0.984]FS[+79.966]Y.E		N[+1], S[+80]	888.891	2	1776.78	1776.78	0	-1.4	19	Non	349.24	349.24	313.64	6.49	1125	>sp|P02817|AMELX_BOVIN Amelogenin, X isoform OS=Bos taurus OX=9913 GN=AMELX PE=1 SV=2	1	hf1_eb_18273_82_20032023.ScanId;v=1;d1=20314.20314.2	controllerType=0 controllerNumber=1 scan=20314	48.0619
23366:2	1	P.LPPHPGHPGYIN[+0.984]FS[+79.966]Y.E		N[+1], S[+80]	888.891	2	1776.77	1776.78	0	-2.3	19	Non	549.28	549.28	357.1	7.08	1125	>sp|P02817|AMELX_BOVIN Amelogenin, X isoform OS=Bos taurus OX=9913 GN=AMELX PE=1 SV=2	1	hf1_eb_18273_82_20032023.ScanId;v=1;d1=20121.20121.2	controllerType=0 controllerNumber=1 scan=20121	47.7082
21193:3	1	P.LPPHPGHPGYINFS[+79.966]YE.V		S[+80]	635.618	3	1904.84	1904.84	0	0.9	19	Non	99.12	57.65	57.65	0.99	1125	>sp|P02817|AMELX_BOVIN Amelogenin, X isoform OS=Bos taurus OX=9913 GN=AMELX PE=1 SV=2	1	hf1_eb_18273_82_20032023.ScanId;v=1;d1=18568.18568.3	controllerType=0 controllerNumber=1 scan=18568	44.893
22268:3	1	P.LPPHPGHPGYIN[+0.984]FS[+79.966]YE.V		N[+1], S[+80]	635.943	3	1905.81	1905.82	0	-3.4	19	Non	54.7	54.7	54.7	0.68	1125	>sp|P02817|AMELX_BOVIN Amelogenin, X isoform OS=Bos taurus OX=9913 GN=AMELX PE=1 SV=2	1	hf1_eb_18273_82_20032023.ScanId;v=1;d1=19347.19347.3	controllerType=0 controllerNumber=1 scan=19347	46.2802
21882:3	1	P.LPPHPGHPGYIN[+0.984]FS[+79.966]YE.V		N[+1], S[+80]	635.944	3	1905.82	1905.82	0	-1.6	19	Non	151.8	151.8	137.96	2.21	1125	>sp|P02817|AMELX_BOVIN Amelogenin, X isoform OS=Bos taurus OX=9913 GN=AMELX PE=1 SV=2	1	hf1_eb_18273_82_20032023.ScanId;v=1;d1=19066.19066.3	controllerType=0 controllerNumber=1 scan=19066	45.7892
22285:2	1	P.LPPHPGHPGYIN[+0.984]FS[+79.966]YE.V		N[+1], S[+80]	953.415	2	1905.82	1905.82	0	1.1	19	Non	175.41	175.41	175.41	3.42	1125	>sp|P02817|AMELX_BOVIN Amelogenin, X isoform OS=Bos taurus OX=9913 GN=AMELX PE=1 SV=2	1	hf1_eb_18273_82_20032023.ScanId;v=1;d1=19360.19360.2	controllerType=0 controllerNumber=1 scan=19360	46.3052
22167:2	1	P.LPPHPGHPGYIN[+0.984]FS[+79.966]YE.V		N[+1], S[+80]	953.412	2	1905.82	1905.82	0	-2.3	19	Non	311.93	290.04	258.3	5.65	1125	>sp|P02817|AMELX_BOVIN Amelogenin, X isoform OS=Bos taurus OX=9913 GN=AMELX PE=1 SV=2	1	hf1_eb_18273_82_20032023.ScanId;v=1;d1=19270.19270.2	controllerType=0 controllerNumber=1 scan=19270	46.1455
21889:2	1	P.LPPHPGHPGYIN[+0.984]FS[+79.966]YE.V		N[+1], S[+80]	953.414	2	1905.82	1905.82	0	0	19	Non	396.55	336.48	281.94	6.22	1125	>sp|P02817|AMELX_BOVIN Amelogenin, X isoform OS=Bos taurus OX=9913 GN=AMELX PE=1 SV=2	1	hf1_eb_18273_82_20032023.ScanId;v=1;d1=19070.19070.2	controllerType=0 controllerNumber=1 scan=19070	45.7952
28899:3	1	P.LPPHPGHPGYINFS[+79.966]YEVL.T		S[+80]	706.334	3	2116.99	2116.99	0	-0.5	19	Non	105.18	105.18	41.14	1.46	1125	>sp|P02817|AMELX_BOVIN Amelogenin, X isoform OS=Bos taurus OX=9913 GN=AMELX PE=1 SV=2	1	hf1_eb_18273_82_20032023.ScanId;v=1;d1=24006.24006.3	controllerType=0 controllerNumber=1 scan=24006	54.7284
29173:3	1	P.LPPHPGHPGYINFS[+79.966]YEVL.T		S[+80]	706.328	3	2116.97	2116.99	0	-8.7	19	Non	130.8	130.8	130.8	0.63	1125	>sp|P02817|AMELX_BOVIN Amelogenin, X isoform OS=Bos taurus OX=9913 GN=AMELX PE=1 SV=2	1	hf1_eb_18273_82_20032023.ScanId;v=1;d1=24195.24195.3	controllerType=0 controllerNumber=1 scan=24195	55.0694
26703:3	1	P.LPPHPGHPGYIN[+0.984]FSYEVL.T		N[+1]	680.008	3	2038.01	2038.01	0	0.5	19	Non	135.19	135.19	135.19	1.06	1125	>sp|P02817|AMELX_BOVIN Amelogenin, X isoform OS=Bos taurus OX=9913 GN=AMELX PE=1 SV=2	1	hf1_eb_18273_82_20032023.ScanId;v=1;d1=22512.22512.3	controllerType=0 controllerNumber=1 scan=22512	52.0647
27096:3	1	P.LPPHPGHPGYIN[+0.984]FSYEVL.T		N[+1]	680.006	3	2038	2038.01	0	-1.4	19	Non	142.04	142.04	142.04	1.85	1125	>sp|P02817|AMELX_BOVIN Amelogenin, X isoform OS=Bos taurus OX=9913 GN=AMELX PE=1 SV=2	1	hf1_eb_18273_82_20032023.ScanId;v=1;d1=22776.22776.3	controllerType=0 controllerNumber=1 scan=22776	52.5418
30127:2	1	P.LPPHPGHPGYIN[+0.984]FS[+79.966]YEVL.T		N[+1], S[+80]	1059.49	2	2117.98	2117.97	0	4.3	19	Non	32.67	32.67	32.67	0.32	1125	>sp|P02817|AMELX_BOVIN Amelogenin, X isoform OS=Bos taurus OX=9913 GN=AMELX PE=1 SV=2	1	hf1_eb_18273_82_20032023.ScanId;v=1;d1=24871.24871.2	controllerType=0 controllerNumber=1 scan=24871	56.2934
29851:2	1	P.LPPHPGHPGYIN[+0.984]FS[+79.966]YEVL.T		N[+1], S[+80]	1059.49	2	2117.98	2117.97	0	2.3	19	Non	60.25	60.25	60.25	1.07	1125	>sp|P02817|AMELX_BOVIN Amelogenin, X isoform OS=Bos taurus OX=9913 GN=AMELX PE=1 SV=2	1	hf1_eb_18273_82_20032023.ScanId;v=1;d1=24675.24675.2	controllerType=0 controllerNumber=1 scan=24675	55.9417
29831:3	1	P.LPPHPGHPGYIN[+0.984]FS[+79.966]YEVL.T		N[+1], S[+80]	706.663	3	2117.97	2117.97	0	0	19	Non	72.67	72.67	15.18	0.65	1125	>sp|P02817|AMELX_BOVIN Amelogenin, X isoform OS=Bos taurus OX=9913 GN=AMELX PE=1 SV=2	1	hf1_eb_18273_82_20032023.ScanId;v=1;d1=24662.24662.3	controllerType=0 controllerNumber=1 scan=24662	55.9192
29046:2	1	P.LPPHPGHPGYIN[+0.984]FS[+79.966]YEVL.T		N[+1], S[+80]	1059.49	2	2117.98	2117.97	0	4.4	19	Non	119.6	119.6	119.6	1.43	1125	>sp|P02817|AMELX_BOVIN Amelogenin, X isoform OS=Bos taurus OX=9913 GN=AMELX PE=1 SV=2	1	hf1_eb_18273_82_20032023.ScanId;v=1;d1=24104.24104.2	controllerType=0 controllerNumber=1 scan=24104	54.9033
29174:3	1	P.LPPHPGHPGYIN[+0.984]FS[+79.966]YEVL.T		N[+1], S[+80]	706.662	3	2117.97	2117.97	0	-1.2	19	Non	135.28	135.28	45.52	2.23	1125	>sp|P02817|AMELX_BOVIN Amelogenin, X isoform OS=Bos taurus OX=9913 GN=AMELX PE=1 SV=2	1	hf1_eb_18273_82_20032023.ScanId;v=1;d1=24195.24195.3	controllerType=0 controllerNumber=1 scan=24195	55.0694
27275:3	1	P.LPPHPGHPGYINFS[+79.966]YEVLT.P		S[+80]	740.016	3	2218.03	2218.04	0	-1.8	19	Non	57.8	57.8	10.28	0.65	1125	>sp|P02817|AMELX_BOVIN Amelogenin, X isoform OS=Bos taurus OX=9913 GN=AMELX PE=1 SV=2	1	hf1_eb_18273_82_20032023.ScanId;v=1;d1=22893.22893.2	controllerType=0 controllerNumber=1 scan=22893	52.747
27288:3	1	P.LPPHPGHPGYINFS[+79.966]YEVLT.P		S[+80]	740.016	3	2218.03	2218.04	0	-1.8	19	Non	98.34	98.34	43.56	1.46	1125	>sp|P02817|AMELX_BOVIN Amelogenin, X isoform OS=Bos taurus OX=9913 GN=AMELX PE=1 SV=2	1	hf1_eb_18273_82_20032023.ScanId;v=1;d1=22900.22900.3	controllerType=0 controllerNumber=1 scan=22900	52.7574
28509:3	1	P.LPPHPGHPGYIN[+0.984]FS[+79.966]YEVLT.P		N[+1], S[+80]	740.345	3	2219.02	2219.02	0	0.2	19	Non	113	113	30.07	0.91	1125	>sp|P02817|AMELX_BOVIN Amelogenin, X isoform OS=Bos taurus OX=9913 GN=AMELX PE=1 SV=2	1	hf1_eb_18273_82_20032023.ScanId;v=1;d1=23738.23738.3	controllerType=0 controllerNumber=1 scan=23738	54.2557
27438:3	1	P.LPPHPGHPGYIN[+0.984]FSYEVLTP.L		N[+1]	746.039	3	2236.1	2236.11	0	-1.7	19	Non	46.48	46.48	46.48	0.68	1125	>sp|P02817|AMELX_BOVIN Amelogenin, X isoform OS=Bos taurus OX=9913 GN=AMELX PE=1 SV=2	1	hf1_eb_18273_82_20032023.ScanId;v=1;d1=23009.23009.3	controllerType=0 controllerNumber=1 scan=23009	52.9592
29222:3	1	P.LPPHPGHPGYINFS[+79.966]YEVLTP.L		S[+80]	772.365	3	2315.08	2315.09	0	-4.2	19	Non	166.52	166.52	33.49	1.25	1125	>sp|P02817|AMELX_BOVIN Amelogenin, X isoform OS=Bos taurus OX=9913 GN=AMELX PE=1 SV=2	1	hf1_eb_18273_82_20032023.ScanId;v=1;d1=24231.24231.3	controllerType=0 controllerNumber=1 scan=24231	55.1346
29837:3	1	P.LPPHPGHPGYIN[+0.984]FS[+79.966]YEVLTP.L		N[+1], S[+80]	772.696	3	2316.07	2316.07	0	-0.8	19	Non	12.55	12.55	12.49	0.56	1125	>sp|P02817|AMELX_BOVIN Amelogenin, X isoform OS=Bos taurus OX=9913 GN=AMELX PE=1 SV=2	1	hf1_eb_18273_82_20032023.ScanId;v=1;d1=24666.24666.3	controllerType=0 controllerNumber=1 scan=24666	55.9253
30115:3	1	P.LPPHPGHPGYIN[+0.984]FS[+79.966]YEVLTP.L		N[+1], S[+80]	772.695	3	2316.07	2316.07	0	-0.9	19	Non	121.14	117.12	71.56	1.54	1125	>sp|P02817|AMELX_BOVIN Amelogenin, X isoform OS=Bos taurus OX=9913 GN=AMELX PE=1 SV=2	1	hf1_eb_18273_82_20032023.ScanId;v=1;d1=24863.24863.3	controllerType=0 controllerNumber=1 scan=24863	56.2786
31774:3	1	P.LPPHPGHPGYIN[+0.984]FSYEVLTPL.K		N[+1]	783.735	3	2349.19	2349.19	0	-0.5	19	Non	57.61	57.61	57.61	1.27	1125	>sp|P02817|AMELX_BOVIN Amelogenin, X isoform OS=Bos taurus OX=9913 GN=AMELX PE=1 SV=2	1	hf1_eb_18273_82_20032023.ScanId;v=1;d1=26047.26047.3	controllerType=0 controllerNumber=1 scan=26047	58.4388
33422:3	1	P.LPPHPGHPGYINFS[+79.966]YEVLTPL.K		S[+80]	810.063	3	2428.17	2428.17	0	0.1	19	Non	218.12	218.12	68.16	3.42	1125	>sp|P02817|AMELX_BOVIN Amelogenin, X isoform OS=Bos taurus OX=9913 GN=AMELX PE=1 SV=2	1	hf1_eb_18273_82_20032023.ScanId;v=1;d1=27189.27189.3	controllerType=0 controllerNumber=1 scan=27189	60.5653
33598:2	1	P.LPPHPGHPGYIN[+0.984]FS[+79.966]YEVLTPL.K		N[+1], S[+80]	1215.09	2	2429.17	2429.16	0	4.2	19	Non	121.58	121.58	104.05	2.15	1125	>sp|P02817|AMELX_BOVIN Amelogenin, X isoform OS=Bos taurus OX=9913 GN=AMELX PE=1 SV=2	1	hf1_eb_18273_82_20032023.ScanId;v=1;d1=27313.27313.2	controllerType=0 controllerNumber=1 scan=27313	60.8001
33956:3	1	P.LPPHPGHPGYIN[+0.984]FS[+79.966]YEVLTPL.K		N[+1], S[+80]	810.39	3	2429.16	2429.16	0	-0.4	19	Non	142.21	142.21	81.45	2.26	1125	>sp|P02817|AMELX_BOVIN Amelogenin, X isoform OS=Bos taurus OX=9913 GN=AMELX PE=1 SV=2	1	hf1_eb_18273_82_20032023.ScanId;v=1;d1=27560.27560.3	controllerType=0 controllerNumber=1 scan=27560	61.2603
34476:3	1	P.LPPHPGHPGYIN[+0.984]FS[+79.966]YEVLTPL.K		N[+1], S[+80]	810.391	3	2429.16	2429.16	0	0	19	Non	155.23	155.23	49.88	2.26	1125	>sp|P02817|AMELX_BOVIN Amelogenin, X isoform OS=Bos taurus OX=9913 GN=AMELX PE=1 SV=2	1	hf1_eb_18273_82_20032023.ScanId;v=1;d1=27928.27928.3	controllerType=0 controllerNumber=1 scan=27928	61.9643
34202:3	1	P.LPPHPGHPGYIN[+0.984]FS[+79.966]YEVLTPL.K		N[+1], S[+80]	810.392	3	2429.16	2429.16	0	1	19	Non	218.62	218.62	101.99	3.4	1125	>sp|P02817|AMELX_BOVIN Amelogenin, X isoform OS=Bos taurus OX=9913 GN=AMELX PE=1 SV=2	1	hf1_eb_18273_82_20032023.ScanId;v=1;d1=27740.27740.3	controllerType=0 controllerNumber=1 scan=27740	61.6158
33688:3	1	P.LPPHPGHPGYIN[+0.984]FS[+79.966]YEVLTPL.K		N[+1], S[+80]	810.391	3	2429.16	2429.16	0	0.8	19	Non	353.61	353.61	157.93	4.99	1125	>sp|P02817|AMELX_BOVIN Amelogenin, X isoform OS=Bos taurus OX=9913 GN=AMELX PE=1 SV=2	1	hf1_eb_18273_82_20032023.ScanId;v=1;d1=27374.27374.3	controllerType=0 controllerNumber=1 scan=27374	60.9133
27615:4	1	P.LPPHPGHPGYINFSYEVLTPLK.W			619.826	4	2476.28	2476.3	0	-7.8	19	NRagged	297.28	297.28	297.28	4.66	1125	>sp|P02817|AMELX_BOVIN Amelogenin, X isoform OS=Bos taurus OX=9913 GN=AMELX PE=1 SV=2	1	hf1_eb_18273_82_20032023.ScanId;v=1;d1=23132.23132.4	controllerType=0 controllerNumber=1 scan=23132	53.182
26658:3	1	P.LPPHPGHPGYIN[+0.984]FSYEVLTPLK.W		N[+1]	826.435	3	2477.29	2477.29	0	1.2	19	NRagged	165.97	165.97	165.97	4.69	1125	>sp|P02817|AMELX_BOVIN Amelogenin, X isoform OS=Bos taurus OX=9913 GN=AMELX PE=1 SV=2	1	hf1_eb_18273_82_20032023.ScanId;v=1;d1=22480.22480.3	controllerType=0 controllerNumber=1 scan=22480	52.0052
27616:4	1	P.LPPHPGHPGYIN[+0.984]FSYEVLTPLK.W		N[+1]	620.077	4	2477.29	2477.29	0	0.3	19	NRagged	368.28	368.28	368.28	7.13	1125	>sp|P02817|AMELX_BOVIN Amelogenin, X isoform OS=Bos taurus OX=9913 GN=AMELX PE=1 SV=2	1	hf1_eb_18273_82_20032023.ScanId;v=1;d1=23132.23132.4	controllerType=0 controllerNumber=1 scan=23132	53.182
28696:3	1	P.LPPHPGHPGYINFS[+79.966]YEVLTPLK.W		S[+80]	852.756	3	2556.25	2556.27	0	-6.1	19	NRagged	637.35	637.35	212.47	8.37	1125	>sp|P02817|AMELX_BOVIN Amelogenin, X isoform OS=Bos taurus OX=9913 GN=AMELX PE=1 SV=2	1	hf1_eb_18273_82_20032023.ScanId;v=1;d1=23869.23869.3	controllerType=0 controllerNumber=1 scan=23869	54.4848
28401:3	1	P.LPPHPGHPGYINFS[+79.966]YEVLTPLK.W		S[+80]	852.76	3	2556.27	2556.27	0	-0.9	19	NRagged	931.97	931.97	468.78	15.61	1125	>sp|P02817|AMELX_BOVIN Amelogenin, X isoform OS=Bos taurus OX=9913 GN=AMELX PE=1 SV=2	1	hf1_eb_18273_82_20032023.ScanId;v=1;d1=23665.23665.3	controllerType=0 controllerNumber=1 scan=23665	54.1268
29459:4	1	P.LPPHPGHPGYIN[+0.984]FS[+79.966]YEVLTPLK.W		N[+1], S[+80]	640.067	4	2557.25	2557.25	0	-2.2	19	NRagged	218.48	218.48	84.51	4.13	1125	>sp|P02817|AMELX_BOVIN Amelogenin, X isoform OS=Bos taurus OX=9913 GN=AMELX PE=1 SV=2	1	hf1_eb_18273_82_20032023.ScanId;v=1;d1=24402.24402.4	controllerType=0 controllerNumber=1 scan=24402	55.4536
29201:4	1	P.LPPHPGHPGYIN[+0.984]FS[+79.966]YEVLTPLK.W		N[+1], S[+80]	640.068	4	2557.25	2557.25	0	-1.4	19	NRagged	240.71	240.71	87.36	5.85	1125	>sp|P02817|AMELX_BOVIN Amelogenin, X isoform OS=Bos taurus OX=9913 GN=AMELX PE=1 SV=2	1	hf1_eb_18273_82_20032023.ScanId;v=1;d1=24216.24216.4	controllerType=0 controllerNumber=1 scan=24216	55.1064
29649:3	1	P.LPPHPGHPGYIN[+0.984]FS[+79.966]YEVLTPLK.W		N[+1], S[+80]	853.09	3	2557.26	2557.25	0	1.6	19	NRagged	241.84	241.84	109.97	6.32	1125	>sp|P02817|AMELX_BOVIN Amelogenin, X isoform OS=Bos taurus OX=9913 GN=AMELX PE=1 SV=2	1	hf1_eb_18273_82_20032023.ScanId;v=1;d1=24537.24537.3	controllerType=0 controllerNumber=1 scan=24537	55.6981
27772:3	1	P.LPPHPGHP[+15.995]GYINFS[+79.966]YEVLTPLK.W		P[+16], S[+80]	858.092	3	2572.26	2572.26	0	-0.9	19	NRagged	438.55	438.55	0	8.03	1125	>sp|P02817|AMELX_BOVIN Amelogenin, X isoform OS=Bos taurus OX=9913 GN=AMELX PE=1 SV=2	1	hf1_eb_18273_82_20032023.ScanId;v=1;d1=23239.23239.3	controllerType=0 controllerNumber=1 scan=23239	53.3722
29119:3	1	P.LPPHPGHPGYIN[+0.984]FS[+79.966]YEVLTPLK.W		N[+1], S[+80]	853.089	3	2557.25	2557.25	0	-0.5	19	NRagged	724.63	724.63	269.15	11.61	1125	>sp|P02817|AMELX_BOVIN Amelogenin, X isoform OS=Bos taurus OX=9913 GN=AMELX PE=1 SV=2	1	hf1_eb_18273_82_20032023.ScanId;v=1;d1=24157.24157.3	controllerType=0 controllerNumber=1 scan=24157	54.9991
28697:3	1	P.LPPHPGHPGYIN[+0.984]FS[+79.966]YEVLTPLK.W		N[+1], S[+80]	853.089	3	2557.25	2557.25	0	0.4	19	NRagged	851.1	851.1	412.37	14.6	1125	>sp|P02817|AMELX_BOVIN Amelogenin, X isoform OS=Bos taurus OX=9913 GN=AMELX PE=1 SV=2	1	hf1_eb_18273_82_20032023.ScanId;v=1;d1=23869.23869.3	controllerType=0 controllerNumber=1 scan=23869	54.4848
29376:3	1	P.LPPHPGHPGYIN[+0.984]FS[+79.966]YEVLTPLK.W		N[+1], S[+80]	853.087	3	2557.25	2557.25	0	-2.2	19	NRagged	930.41	930.41	481.05	15.26	1125	>sp|P02817|AMELX_BOVIN Amelogenin, X isoform OS=Bos taurus OX=9913 GN=AMELX PE=1 SV=2	1	hf1_eb_18273_82_20032023.ScanId;v=1;d1=24341.24341.3	controllerType=0 controllerNumber=1 scan=24341	55.3379
22028:3	1	P.LPPHPGHPGYIN[+0.984]F[+15.995]S[+79.966]YEVLTPLK.W		F[+16], N[+1], S[+80]	858.414	3	2573.23	2573.25	0	-7.9	19	NRagged	17.37	17.37	5.73	1.12	1125	>sp|P02817|AMELX_BOVIN Amelogenin, X isoform OS=Bos taurus OX=9913 GN=AMELX PE=1 SV=2	1	hf1_eb_18273_82_20032023.ScanId;v=1;d1=19173.19173.3	controllerType=0 controllerNumber=1 scan=19173	45.9753
28826:3	1	P.LPPHPGHP[+15.995]GYIN[+0.984]FS[+79.966]YEVLTPLK.W		N[+1], P[+16], S[+80]	858.42	3	2573.25	2573.25	0	-0.7	19	NRagged	117.18	117.18	0	3.31	1125	>sp|P02817|AMELX_BOVIN Amelogenin, X isoform OS=Bos taurus OX=9913 GN=AMELX PE=1 SV=2	1	hf1_eb_18273_82_20032023.ScanId;v=1;d1=23957.23957.3	controllerType=0 controllerNumber=1 scan=23957	54.6447
28553:3	1	P.LPPHPGHPGY[+15.995]IN[+0.984]FS[+79.966]YEVLTPLK.W		N[+1], S[+80], Y[+16]	858.42	3	2573.25	2573.25	0	-0.3	19	NRagged	336.67	336.67	0.97	6.8	1125	>sp|P02817|AMELX_BOVIN Amelogenin, X isoform OS=Bos taurus OX=9913 GN=AMELX PE=1 SV=2	1	hf1_eb_18273_82_20032023.ScanId;v=1;d1=23764.23764.3	controllerType=0 controllerNumber=1 scan=23764	54.2998
07500:1	1	L.PPHP.G			447.234	1	447.234	447.235	0	-1.4	20	Non	232.27	20.64	20.64	0.29	1125	>sp|P02817|AMELX_BOVIN Amelogenin, X isoform OS=Bos taurus OX=9913 GN=AMELX PE=1 SV=2	1	hf1_eb_18273_82_20032023.ScanId;v=1;d1=8285.8285.2	controllerType=0 controllerNumber=1 scan=8285	25.766
37382:1	1	L.PPHPG.H			504.257	1	504.257	504.257	0	-0.1	20	Non	53.75	45.18	45.18	0.57	1125	>sp|P02817|AMELX_BOVIN Amelogenin, X isoform OS=Bos taurus OX=9913 GN=AMELX PE=1 SV=2	1	hf1_eb_18273_82_20032023.ScanId;v=1;d1=31320.31320.2	controllerType=0 controllerNumber=1 scan=31320	73.7223
03853:1	1	L.PPHPG.H			504.256	1	504.256	504.257	0	-0.2	20	Non	206.86	105.63	105.63	0.68	1125	>sp|P02817|AMELX_BOVIN Amelogenin, X isoform OS=Bos taurus OX=9913 GN=AMELX PE=1 SV=2	1	hf1_eb_18273_82_20032023.ScanId;v=1;d1=5262.5262.2	controllerType=0 controllerNumber=1 scan=5262	19.3877
06576:1	1	L.PPHPG.H			504.256	1	504.256	504.257	0	-1.2	20	Non	278.91	158.58	158.58	2.5	1125	>sp|P02817|AMELX_BOVIN Amelogenin, X isoform OS=Bos taurus OX=9913 GN=AMELX PE=1 SV=2	1	hf1_eb_18273_82_20032023.ScanId;v=1;d1=7543.7543.2	controllerType=0 controllerNumber=1 scan=7543	24.2104
11274:2	1	L.PPHPGHPG.Y			398.197	2	795.387	795.39	0	-3.7	20	Non	132.68	132.68	132.68	0.59	1125	>sp|P02817|AMELX_BOVIN Amelogenin, X isoform OS=Bos taurus OX=9913 GN=AMELX PE=1 SV=2	1	hf1_eb_18273_82_20032023.ScanId;v=1;d1=11223.11223.3	controllerType=0 controllerNumber=1 scan=11223	31.4651
03342:2	1	L.PPHPGHPG.Y			398.198	2	795.388	795.39	0	-2	20	Non	190.02	190.02	190.02	2.26	1125	>sp|P02817|AMELX_BOVIN Amelogenin, X isoform OS=Bos taurus OX=9913 GN=AMELX PE=1 SV=2	1	hf1_eb_18273_82_20032023.ScanId;v=1;d1=4850.4850.2	controllerType=0 controllerNumber=1 scan=4850	18.5587
06802:2	1	L.PPHPGHPG.Y			398.198	2	795.389	795.39	0	-0.4	20	Non	237.35	165.23	165.23	2.11	1125	>sp|P02817|AMELX_BOVIN Amelogenin, X isoform OS=Bos taurus OX=9913 GN=AMELX PE=1 SV=2	1	hf1_eb_18273_82_20032023.ScanId;v=1;d1=7724.7724.2	controllerType=0 controllerNumber=1 scan=7724	24.5972
03558:2	1	L.PPHPGHPG.Y			398.198	2	795.388	795.39	0	-1.7	20	Non	365.86	363.99	363.99	5.58	1125	>sp|P02817|AMELX_BOVIN Amelogenin, X isoform OS=Bos taurus OX=9913 GN=AMELX PE=1 SV=2	1	hf1_eb_18273_82_20032023.ScanId;v=1;d1=5020.5020.2	controllerType=0 controllerNumber=1 scan=5020	18.8953
02744:2	1	L.PPHPGHPG.Y			398.198	2	795.389	795.39	0	-1.5	20	Non	465.76	376.48	376.48	6.25	1125	>sp|P02817|AMELX_BOVIN Amelogenin, X isoform OS=Bos taurus OX=9913 GN=AMELX PE=1 SV=2	1	hf1_eb_18273_82_20032023.ScanId;v=1;d1=4349.4349.2	controllerType=0 controllerNumber=1 scan=4349	17.5502
02954:2	1	L.PPHPGHPG.Y			398.198	2	795.389	795.39	0	-1.3	20	Non	468.96	400.35	400.35	6.14	1125	>sp|P02817|AMELX_BOVIN Amelogenin, X isoform OS=Bos taurus OX=9913 GN=AMELX PE=1 SV=2	1	hf1_eb_18273_82_20032023.ScanId;v=1;d1=4525.4525.2	controllerType=0 controllerNumber=1 scan=4525	17.8964
00639:2	1	L.PPHPGHPG.Y			398.197	2	795.388	795.39	0	-2.6	20	Non	495.45	350.05	350.05	5.23	1125	>sp|P02817|AMELX_BOVIN Amelogenin, X isoform OS=Bos taurus OX=9913 GN=AMELX PE=1 SV=2	1	hf1_eb_18273_82_20032023.ScanId;v=1;d1=2837.2837.2	controllerType=0 controllerNumber=1 scan=2837	14.8515
02843:2	1	L.PPH[+15.995]PGHPG.Y		H[+16]	406.195	2	811.383	811.385	0	-1.9	20	Non	48.34	48.34	1.29	0.35	1125	>sp|P02817|AMELX_BOVIN Amelogenin, X isoform OS=Bos taurus OX=9913 GN=AMELX PE=1 SV=2	1	hf1_eb_18273_82_20032023.ScanId;v=1;d1=4432.4432.2	controllerType=0 controllerNumber=1 scan=4432	17.7032
07919:2	1	L.PPHPGHP[+15.995]G.Y		P[+16]	406.195	2	811.382	811.385	0	-3.2	20	Non	106.37	106.37	106.37	0.35	1125	>sp|P02817|AMELX_BOVIN Amelogenin, X isoform OS=Bos taurus OX=9913 GN=AMELX PE=1 SV=2	1	hf1_eb_18273_82_20032023.ScanId;v=1;d1=8618.8618.2	controllerType=0 controllerNumber=1 scan=8618	26.4326
02030:2	1	L.PPHPGHP[+15.995]G.Y		P[+16]	406.195	2	811.383	811.385	0	-2.5	20	Non	258.53	82.84	25.84	2.47	1125	>sp|P02817|AMELX_BOVIN Amelogenin, X isoform OS=Bos taurus OX=9913 GN=AMELX PE=1 SV=2	1	hf1_eb_18273_82_20032023.ScanId;v=1;d1=3798.3798.2	controllerType=0 controllerNumber=1 scan=3798	16.5408
02274:2	1	L.PPHPGHP[+15.995]G.Y		P[+16]	406.195	2	811.383	811.385	0	-1.8	20	Non	294.86	129.9	82.14	3.05	1125	>sp|P02817|AMELX_BOVIN Amelogenin, X isoform OS=Bos taurus OX=9913 GN=AMELX PE=1 SV=2	1	hf1_eb_18273_82_20032023.ScanId;v=1;d1=3987.3987.2	controllerType=0 controllerNumber=1 scan=3987	16.8822
01857:2	1	L.PPHPGHP[+15.995]GY.I		P[+16]	487.727	2	974.447	974.448	0	-1	20	Non	79.57	79.57	0	0.36	1125	>sp|P02817|AMELX_BOVIN Amelogenin, X isoform OS=Bos taurus OX=9913 GN=AMELX PE=1 SV=2	1	hf1_eb_18273_82_20032023.ScanId;v=1;d1=3670.3670.2	controllerType=0 controllerNumber=1 scan=3670	16.3076
06696:2	1	L.PPHPGHPGYI.N			536.271	2	1071.54	1071.54	0	-1.6	20	Non	298.6	97.45	97.45	3.08	1125	>sp|P02817|AMELX_BOVIN Amelogenin, X isoform OS=Bos taurus OX=9913 GN=AMELX PE=1 SV=2	1	hf1_eb_18273_82_20032023.ScanId;v=1;d1=7635.7635.2	controllerType=0 controllerNumber=1 scan=7635	24.3867
05098:3	1	L.PPHPGHPGYIN.F			395.864	3	1185.58	1185.58	0	-1.3	20	Non	282.3	282.3	282.3	4.43	1125	>sp|P02817|AMELX_BOVIN Amelogenin, X isoform OS=Bos taurus OX=9913 GN=AMELX PE=1 SV=2	1	hf1_eb_18273_82_20032023.ScanId;v=1;d1=6304.6304.3	controllerType=0 controllerNumber=1 scan=6304	21.6293
05984:3	1	L.PPHPGHPGYIN[+0.984].F		N[+1]	396.193	3	1186.56	1186.56	0	-0.6	20	Non	262.73	262.73	262.73	4.15	1125	>sp|P02817|AMELX_BOVIN Amelogenin, X isoform OS=Bos taurus OX=9913 GN=AMELX PE=1 SV=2	1	hf1_eb_18273_82_20032023.ScanId;v=1;d1=7062.7062.3	controllerType=0 controllerNumber=1 scan=7062	23.2442
06193:3	1	L.PPHPGHPGYIN[+0.984].F		N[+1]	396.193	3	1186.56	1186.56	0	-0.7	20	Non	302.8	302.8	302.8	4.98	1125	>sp|P02817|AMELX_BOVIN Amelogenin, X isoform OS=Bos taurus OX=9913 GN=AMELX PE=1 SV=2	1	hf1_eb_18273_82_20032023.ScanId;v=1;d1=7235.7235.3	controllerType=0 controllerNumber=1 scan=7235	23.5892
06006:2	1	L.PPHPGHPGYIN[+0.984].F		N[+1]	593.785	2	1186.56	1186.56	0	-0.9	20	Non	389.96	389.96	389.96	6.37	1125	>sp|P02817|AMELX_BOVIN Amelogenin, X isoform OS=Bos taurus OX=9913 GN=AMELX PE=1 SV=2	1	hf1_eb_18273_82_20032023.ScanId;v=1;d1=7078.7078.2	controllerType=0 controllerNumber=1 scan=7078	23.2722
04693:3	1	L.PPHPGHP[+15.995]GYIN[+0.984].F		N[+1], P[+16]	401.524	3	1202.56	1202.56	0	-0.8	20	Non	161.59	98.53	50.18	1.45	1125	>sp|P02817|AMELX_BOVIN Amelogenin, X isoform OS=Bos taurus OX=9913 GN=AMELX PE=1 SV=2	1	hf1_eb_18273_82_20032023.ScanId;v=1;d1=5973.5973.3	controllerType=0 controllerNumber=1 scan=5973	20.9453
04597:2	1	L.PPHPGHP[+15.995]GYIN[+0.984].F		N[+1], P[+16]	601.783	2	1202.56	1202.56	0	-0.5	20	Non	210.33	210.33	0	2.86	1125	>sp|P02817|AMELX_BOVIN Amelogenin, X isoform OS=Bos taurus OX=9913 GN=AMELX PE=1 SV=2	1	hf1_eb_18273_82_20032023.ScanId;v=1;d1=5899.5899.2	controllerType=0 controllerNumber=1 scan=5899	20.7959
22474:2	1	L.PPHPGHPGYINF.S			666.825	2	1332.64	1332.65	0	-4.3	20	Non	120.63	120.63	120.63	0.41	1125	>sp|P02817|AMELX_BOVIN Amelogenin, X isoform OS=Bos taurus OX=9913 GN=AMELX PE=1 SV=2	1	hf1_eb_18273_82_20032023.ScanId;v=1;d1=19496.19496.2	controllerType=0 controllerNumber=1 scan=19496	46.5414
13765:3	1	L.PPHPGHPGYINF.S			444.887	3	1332.65	1332.65	0	-1.7	20	Non	165.55	165.55	165.55	1.62	1125	>sp|P02817|AMELX_BOVIN Amelogenin, X isoform OS=Bos taurus OX=9913 GN=AMELX PE=1 SV=2	1	hf1_eb_18273_82_20032023.ScanId;v=1;d1=13089.13089.3	controllerType=0 controllerNumber=1 scan=13089	34.9286
14758:2	1	L.PPHPGHPGYINF.S			666.827	2	1332.65	1332.65	0	-0.5	20	Non	173.06	173.06	173.06	2.2	1125	>sp|P02817|AMELX_BOVIN Amelogenin, X isoform OS=Bos taurus OX=9913 GN=AMELX PE=1 SV=2	1	hf1_eb_18273_82_20032023.ScanId;v=1;d1=13818.13818.2	controllerType=0 controllerNumber=1 scan=13818	36.2847
16193:2	1	L.PPHPGHPGYINF.S			666.827	2	1332.65	1332.65	0	-1.6	20	Non	179.1	163.64	163.64	2.2	1125	>sp|P02817|AMELX_BOVIN Amelogenin, X isoform OS=Bos taurus OX=9913 GN=AMELX PE=1 SV=2	1	hf1_eb_18273_82_20032023.ScanId;v=1;d1=14856.14856.2	controllerType=0 controllerNumber=1 scan=14856	38.1867
14411:3	1	L.PPHPGHPGYINF.S			444.887	3	1332.65	1332.65	0	-1.3	20	Non	238.44	238.44	238.44	2.84	1125	>sp|P02817|AMELX_BOVIN Amelogenin, X isoform OS=Bos taurus OX=9913 GN=AMELX PE=1 SV=2	1	hf1_eb_18273_82_20032023.ScanId;v=1;d1=13563.13563.3	controllerType=0 controllerNumber=1 scan=13563	35.8101
13551:3	1	L.PPHPGHPGYINF.S			444.887	3	1332.65	1332.65	0	-0.8	20	Non	275.34	269.59	269.59	4.15	1125	>sp|P02817|AMELX_BOVIN Amelogenin, X isoform OS=Bos taurus OX=9913 GN=AMELX PE=1 SV=2	1	hf1_eb_18273_82_20032023.ScanId;v=1;d1=12930.12930.3	controllerType=0 controllerNumber=1 scan=12930	34.6413
14782:3	1	L.PPHPGHPGYINF.S			444.887	3	1332.65	1332.65	0	-1.7	20	Non	320	304.3	304.3	4.98	1125	>sp|P02817|AMELX_BOVIN Amelogenin, X isoform OS=Bos taurus OX=9913 GN=AMELX PE=1 SV=2	1	hf1_eb_18273_82_20032023.ScanId;v=1;d1=13838.13838.3	controllerType=0 controllerNumber=1 scan=13838	36.3251
13552:2	1	L.PPHPGHPGYINF.S			666.828	2	1332.65	1332.65	0	-0.3	20	Non	446.06	411.82	411.82	6.38	1125	>sp|P02817|AMELX_BOVIN Amelogenin, X isoform OS=Bos taurus OX=9913 GN=AMELX PE=1 SV=2	1	hf1_eb_18273_82_20032023.ScanId;v=1;d1=12931.12931.2	controllerType=0 controllerNumber=1 scan=12931	34.6428
14493:2	1	L.PPHPGHPGYINF.S			666.827	2	1332.65	1332.65	0	-0.5	20	Non	535.04	425.43	425.43	6.36	1125	>sp|P02817|AMELX_BOVIN Amelogenin, X isoform OS=Bos taurus OX=9913 GN=AMELX PE=1 SV=2	1	hf1_eb_18273_82_20032023.ScanId;v=1;d1=13623.13623.2	controllerType=0 controllerNumber=1 scan=13623	35.9231
16071:3	1	L.PPHPGHPGYIN[+0.984]F.S		N[+1]	445.215	3	1333.63	1333.63	0	-0.9	20	Non	130.17	108.77	108.77	0.56	1125	>sp|P02817|AMELX_BOVIN Amelogenin, X isoform OS=Bos taurus OX=9913 GN=AMELX PE=1 SV=2	1	hf1_eb_18273_82_20032023.ScanId;v=1;d1=14771.14771.2	controllerType=0 controllerNumber=1 scan=14771	38.0431
15379:3	1	L.PPHPGHPGYIN[+0.984]F.S		N[+1]	445.215	3	1333.63	1333.63	0	-2	20	Non	244.27	189.33	189.33	2.96	1125	>sp|P02817|AMELX_BOVIN Amelogenin, X isoform OS=Bos taurus OX=9913 GN=AMELX PE=1 SV=2	1	hf1_eb_18273_82_20032023.ScanId;v=1;d1=14289.14289.3	controllerType=0 controllerNumber=1 scan=14289	37.1846
14161:3	1	L.PPHPGHPGYIN[+0.984]F.S		N[+1]	445.215	3	1333.63	1333.63	0	-1.6	20	Non	250.45	192.43	192.43	3.28	1125	>sp|P02817|AMELX_BOVIN Amelogenin, X isoform OS=Bos taurus OX=9913 GN=AMELX PE=1 SV=2	1	hf1_eb_18273_82_20032023.ScanId;v=1;d1=13380.13380.3	controllerType=0 controllerNumber=1 scan=13380	35.4607
15931:3	1	L.PPHPGHPGYIN[+0.984]F.S		N[+1]	445.215	3	1333.63	1333.63	0	-0.7	20	Non	288.28	266.47	266.47	4.31	1125	>sp|P02817|AMELX_BOVIN Amelogenin, X isoform OS=Bos taurus OX=9913 GN=AMELX PE=1 SV=2	1	hf1_eb_18273_82_20032023.ScanId;v=1;d1=14679.14679.3	controllerType=0 controllerNumber=1 scan=14679	37.8908
13341:3	1	L.PPHPGHPGYIN[+0.984]F.S		N[+1]	445.215	3	1333.63	1333.63	0	-0.6	20	Non	295.46	259.64	259.64	4.31	1125	>sp|P02817|AMELX_BOVIN Amelogenin, X isoform OS=Bos taurus OX=9913 GN=AMELX PE=1 SV=2	1	hf1_eb_18273_82_20032023.ScanId;v=1;d1=12768.12768.3	controllerType=0 controllerNumber=1 scan=12768	34.3517
15649:3	1	L.PPHPGHPGYIN[+0.984]F.S		N[+1]	445.216	3	1333.63	1333.63	0	0.4	20	Non	310.49	276.51	276.51	4.85	1125	>sp|P02817|AMELX_BOVIN Amelogenin, X isoform OS=Bos taurus OX=9913 GN=AMELX PE=1 SV=2	1	hf1_eb_18273_82_20032023.ScanId;v=1;d1=14479.14479.3	controllerType=0 controllerNumber=1 scan=14479	37.5341
13903:3	1	L.PPHPGHPGYIN[+0.984]F.S		N[+1]	445.215	3	1333.63	1333.63	0	-1.7	20	Non	333.96	283.07	283.07	4.95	1125	>sp|P02817|AMELX_BOVIN Amelogenin, X isoform OS=Bos taurus OX=9913 GN=AMELX PE=1 SV=2	1	hf1_eb_18273_82_20032023.ScanId;v=1;d1=13188.13188.3	controllerType=0 controllerNumber=1 scan=13188	35.1141
13322:2	1	L.PPHPGHPGYIN[+0.984]F.S		N[+1]	667.319	2	1333.63	1333.63	0	-0.6	20	Non	409.79	318.26	318.26	5.56	1125	>sp|P02817|AMELX_BOVIN Amelogenin, X isoform OS=Bos taurus OX=9913 GN=AMELX PE=1 SV=2	1	hf1_eb_18273_82_20032023.ScanId;v=1;d1=12755.12755.2	controllerType=0 controllerNumber=1 scan=12755	34.3301
14145:2	1	L.PPHPGHPGYIN[+0.984]F.S		N[+1]	667.319	2	1333.63	1333.63	0	-1.5	20	Non	438.65	349.9	349.9	5.67	1125	>sp|P02817|AMELX_BOVIN Amelogenin, X isoform OS=Bos taurus OX=9913 GN=AMELX PE=1 SV=2	1	hf1_eb_18273_82_20032023.ScanId;v=1;d1=13370.13370.2	controllerType=0 controllerNumber=1 scan=13370	35.4437
13892:2	1	L.PPHPGHPGYIN[+0.984]F.S		N[+1]	667.319	2	1333.63	1333.63	0	-1.9	20	Non	506.78	416.74	416.74	6.05	1125	>sp|P02817|AMELX_BOVIN Amelogenin, X isoform OS=Bos taurus OX=9913 GN=AMELX PE=1 SV=2	1	hf1_eb_18273_82_20032023.ScanId;v=1;d1=13180.13180.2	controllerType=0 controllerNumber=1 scan=13180	35.0999
15835:2	1	L.PPHPGHPGYIN[+0.984]F.S		N[+1]	667.32	2	1333.63	1333.63	0	-0.2	20	Non	622.09	494.89	494.89	8.05	1125	>sp|P02817|AMELX_BOVIN Amelogenin, X isoform OS=Bos taurus OX=9913 GN=AMELX PE=1 SV=2	1	hf1_eb_18273_82_20032023.ScanId;v=1;d1=14612.14612.2	controllerType=0 controllerNumber=1 scan=14612	37.7793
15564:2	1	L.PPHPGHPGYIN[+0.984]F.S		N[+1]	667.319	2	1333.63	1333.63	0	-1.1	20	Non	631.68	528.48	528.48	7.82	1125	>sp|P02817|AMELX_BOVIN Amelogenin, X isoform OS=Bos taurus OX=9913 GN=AMELX PE=1 SV=2	1	hf1_eb_18273_82_20032023.ScanId;v=1;d1=14420.14420.2	controllerType=0 controllerNumber=1 scan=14420	37.4262
14722:2	1	L.P[+31.990]PHPGHPGYIN[+0.984]F.S		N[+1], P[+32]	683.313	2	1365.62	1365.62	0	-2	20	Non	108.11	57.61	20.06	0.33	1125	>sp|P02817|AMELX_BOVIN Amelogenin, X isoform OS=Bos taurus OX=9913 GN=AMELX PE=1 SV=2	1	hf1_eb_18273_82_20032023.ScanId;v=1;d1=13792.13792.2	controllerType=0 controllerNumber=1 scan=13792	36.2322
13762:3	1	L.PPHPGHP[+15.995]GYIN[+0.984]F.S		N[+1], P[+16]	450.547	3	1349.63	1349.63	0	-1.2	20	Non	120.09	89.7	14.75	0.92	1125	>sp|P02817|AMELX_BOVIN Amelogenin, X isoform OS=Bos taurus OX=9913 GN=AMELX PE=1 SV=2	1	hf1_eb_18273_82_20032023.ScanId;v=1;d1=13087.13087.3	controllerType=0 controllerNumber=1 scan=13087	34.9256
20136:2	1	L.P[+15.995]PHPGHPGYIN[+0.984]F.S		N[+1], P[+16]	675.315	2	1349.62	1349.63	0	-3.5	20	Non	167.05	135.97	0	1.15	1125	>sp|P02817|AMELX_BOVIN Amelogenin, X isoform OS=Bos taurus OX=9913 GN=AMELX PE=1 SV=2	1	hf1_eb_18273_82_20032023.ScanId;v=1;d1=17774.17774.2	controllerType=0 controllerNumber=1 scan=17774	43.4162
14114:3	1	L.PPHPGHP[+15.995]GYIN[+0.984]F.S		N[+1], P[+16]	450.547	3	1349.63	1349.63	0	-1.3	20	Non	188.94	188.94	30.51	2.31	1125	>sp|P02817|AMELX_BOVIN Amelogenin, X isoform OS=Bos taurus OX=9913 GN=AMELX PE=1 SV=2	1	hf1_eb_18273_82_20032023.ScanId;v=1;d1=13345.13345.3	controllerType=0 controllerNumber=1 scan=13345	35.3973
13863:3	1	L.PPHPGHP[+15.995]GYIN[+0.984]F.S		N[+1], P[+16]	450.546	3	1349.62	1349.63	0	-2.3	20	Non	259.04	250.42	53.06	3.35	1125	>sp|P02817|AMELX_BOVIN Amelogenin, X isoform OS=Bos taurus OX=9913 GN=AMELX PE=1 SV=2	1	hf1_eb_18273_82_20032023.ScanId;v=1;d1=13157.13157.3	controllerType=0 controllerNumber=1 scan=13157	35.0556
20444:2	1	L.PP[+15.995]HPGHPGYIN[+0.984]F.S		N[+1], P[+16]	675.317	2	1349.63	1349.63	0	-0.1	20	Non	386.69	284.9	0	5.02	1125	>sp|P02817|AMELX_BOVIN Amelogenin, X isoform OS=Bos taurus OX=9913 GN=AMELX PE=1 SV=2	1	hf1_eb_18273_82_20032023.ScanId;v=1;d1=18021.18021.2	controllerType=0 controllerNumber=1 scan=18021	43.879
13890:2	1	L.PPHPGHP[+15.995]GYIN[+0.984]F.S		N[+1], P[+16]	675.317	2	1349.63	1349.63	0	-1.1	20	Non	512.73	438.79	25.54	6.4	1125	>sp|P02817|AMELX_BOVIN Amelogenin, X isoform OS=Bos taurus OX=9913 GN=AMELX PE=1 SV=2	1	hf1_eb_18273_82_20032023.ScanId;v=1;d1=13179.13179.2	controllerType=0 controllerNumber=1 scan=13179	35.0984
13834:2	1	L.PPHPGHPGYIN[+0.984]FS.Y		N[+1]	710.834	2	1420.66	1420.66	0	-2.2	20	Non	245.46	245.46	245.46	4.46	1125	>sp|P02817|AMELX_BOVIN Amelogenin, X isoform OS=Bos taurus OX=9913 GN=AMELX PE=1 SV=2	1	hf1_eb_18273_82_20032023.ScanId;v=1;d1=13136.13136.2	controllerType=0 controllerNumber=1 scan=13136	35.0139
14675:3	1	L.PPHPGHPGYIN[+0.984]FS.Y		N[+1]	474.226	3	1420.66	1420.66	0	-1.4	20	Non	257	132.82	132.82	2.85	1125	>sp|P02817|AMELX_BOVIN Amelogenin, X isoform OS=Bos taurus OX=9913 GN=AMELX PE=1 SV=2	1	hf1_eb_18273_82_20032023.ScanId;v=1;d1=13758.13758.3	controllerType=0 controllerNumber=1 scan=13758	36.1708
15998:2	1	L.PPHPGHPGYINFS[+79.966].Y		S[+80]	750.327	2	1499.65	1499.65	0	0.1	20	Non	294.48	237.88	208.94	4.32	1125	>sp|P02817|AMELX_BOVIN Amelogenin, X isoform OS=Bos taurus OX=9913 GN=AMELX PE=1 SV=2	1	hf1_eb_18273_82_20032023.ScanId;v=1;d1=14722.14722.4	controllerType=0 controllerNumber=1 scan=14722	37.9619
17250:3	1	L.PPHPGHPGYIN[+0.984]FS[+79.966].Y		N[+1], S[+80]	500.88	3	1500.63	1500.63	0	-2.8	20	Non	348.5	289.23	289.23	4.78	1125	>sp|P02817|AMELX_BOVIN Amelogenin, X isoform OS=Bos taurus OX=9913 GN=AMELX PE=1 SV=2	1	hf1_eb_18273_82_20032023.ScanId;v=1;d1=15622.15622.3	controllerType=0 controllerNumber=1 scan=15622	39.5321
15704:2	1	L.PPHPGHPGYIN[+0.984]FS[+79.966].Y		N[+1], S[+80]	750.817	2	1500.63	1500.63	0	-2.7	20	Non	461.29	410.2	372.65	6.09	1125	>sp|P02817|AMELX_BOVIN Amelogenin, X isoform OS=Bos taurus OX=9913 GN=AMELX PE=1 SV=2	1	hf1_eb_18273_82_20032023.ScanId;v=1;d1=14521.14521.2	controllerType=0 controllerNumber=1 scan=14521	37.6142
17202:2	1	L.PPHPGHPGYIN[+0.984]FS[+79.966].Y		N[+1], S[+80]	750.817	2	1500.63	1500.63	0	-2.4	20	Non	559.9	502.23	456.84	6.84	1125	>sp|P02817|AMELX_BOVIN Amelogenin, X isoform OS=Bos taurus OX=9913 GN=AMELX PE=1 SV=2	1	hf1_eb_18273_82_20032023.ScanId;v=1;d1=15589.15589.2	controllerType=0 controllerNumber=1 scan=15589	39.471
20647:2	1	L.PPHPGHPGYIN[+0.984]FS[+79.966]YE.V		N[+1], S[+80]	896.872	2	1792.74	1792.74	0	0	20	Non	290.77	290.77	227.26	6	1125	>sp|P02817|AMELX_BOVIN Amelogenin, X isoform OS=Bos taurus OX=9913 GN=AMELX PE=1 SV=2	1	hf1_eb_18273_82_20032023.ScanId;v=1;d1=18170.18170.2	controllerType=0 controllerNumber=1 scan=18170	44.1657
32894:3	1	L.PPHPGHPGYIN[+0.984]FS[+79.966]YEVLTPL.K		N[+1], S[+80]	772.697	3	2316.08	2316.07	0	1.1	20	Non	126.2	126.2	118.4	2.25	1125	>sp|P02817|AMELX_BOVIN Amelogenin, X isoform OS=Bos taurus OX=9913 GN=AMELX PE=1 SV=2	1	hf1_eb_18273_82_20032023.ScanId;v=1;d1=26826.26826.3	controllerType=0 controllerNumber=1 scan=26826	59.8903
27568:3	1	L.PPHPGHPGYINFS[+79.966]YEVLTPLK.W		S[+80]	815.063	3	2443.18	2443.18	0	-3.6	20	NRagged	561.5	561.5	319.66	8.33	1125	>sp|P02817|AMELX_BOVIN Amelogenin, X isoform OS=Bos taurus OX=9913 GN=AMELX PE=1 SV=2	1	hf1_eb_18273_82_20032023.ScanId;v=1;d1=23097.23097.3	controllerType=0 controllerNumber=1 scan=23097	53.1184
28812:3	1	L.PPHPGHPGYIN[+0.984]FS[+79.966]YEVLTPLK.W		N[+1], S[+80]	815.393	3	2444.16	2444.17	0	-1.6	20	NRagged	42.76	42.76	39.19	2.21	1125	>sp|P02817|AMELX_BOVIN Amelogenin, X isoform OS=Bos taurus OX=9913 GN=AMELX PE=1 SV=2	1	hf1_eb_18273_82_20032023.ScanId;v=1;d1=23948.23948.3	controllerType=0 controllerNumber=1 scan=23948	54.6256
28523:3	1	L.PPHPGHPGYIN[+0.984]FS[+79.966]YEVLTPLK.W		N[+1], S[+80]	815.395	3	2444.17	2444.17	0	0.6	20	NRagged	620.07	620.07	421.22	9.67	1125	>sp|P02817|AMELX_BOVIN Amelogenin, X isoform OS=Bos taurus OX=9913 GN=AMELX PE=1 SV=2	1	hf1_eb_18273_82_20032023.ScanId;v=1;d1=23745.23745.3	controllerType=0 controllerNumber=1 scan=23745	54.2657
04248:1	1	P.PHPG.H			407.203	1	407.203	407.204	0	-1.4	21	Non	265.76	27.06	27.06	2.49	1125	>sp|P02817|AMELX_BOVIN Amelogenin, X isoform OS=Bos taurus OX=9913 GN=AMELX PE=1 SV=2	1	hf1_eb_18273_82_20032023.ScanId;v=1;d1=5605.5605.2	controllerType=0 controllerNumber=1 scan=5605	20.1784
02310:1	1	P.PHPGH.P			544.262	1	544.262	544.263	0	-1.3	21	Non	261.93	73.98	73.98	1.09	1125	>sp|P02817|AMELX_BOVIN Amelogenin, X isoform OS=Bos taurus OX=9913 GN=AMELX PE=1 SV=2	1	hf1_eb_18273_82_20032023.ScanId;v=1;d1=4017.4017.2	controllerType=0 controllerNumber=1 scan=4017	16.9376
05020:1	1	P.PHPGHP.G			641.314	1	641.314	641.315	0	-1.6	21	Non	203.73	37.69	37.69	0.05	1125	>sp|P02817|AMELX_BOVIN Amelogenin, X isoform OS=Bos taurus OX=9913 GN=AMELX PE=1 SV=2	1	hf1_eb_18273_82_20032023.ScanId;v=1;d1=6235.6235.2	controllerType=0 controllerNumber=1 scan=6235	21.4704
01967:2	1	P.PHPGHPGY.I			431.203	2	861.398	861.4	0	-2.4	21	Non	332.93	332.93	332.93	4.95	1125	>sp|P02817|AMELX_BOVIN Amelogenin, X isoform OS=Bos taurus OX=9913 GN=AMELX PE=1 SV=2	1	hf1_eb_18273_82_20032023.ScanId;v=1;d1=3750.3750.2	controllerType=0 controllerNumber=1 scan=3750	16.4503
11120:2	1	P.PHPGHPGY[+15.995].I		Y[+16]	439.2	2	877.394	877.395	0	-1.5	21	Non	146.74	73.85	12.22	0.36	1125	>sp|P02817|AMELX_BOVIN Amelogenin, X isoform OS=Bos taurus OX=9913 GN=AMELX PE=1 SV=2	1	hf1_eb_18273_82_20032023.ScanId;v=1;d1=11107.11107.2	controllerType=0 controllerNumber=1 scan=11107	31.2563
05506:2	1	P.PHPGHPGYI.N			487.745	2	974.483	974.484	0	-1.2	21	Non	460.06	460.06	460.06	6.25	1125	>sp|P02817|AMELX_BOVIN Amelogenin, X isoform OS=Bos taurus OX=9913 GN=AMELX PE=1 SV=2	1	hf1_eb_18273_82_20032023.ScanId;v=1;d1=6647.6647.2	controllerType=0 controllerNumber=1 scan=6647	22.3525
03825:2	1	P.PHPGHPGYIN.F			544.767	2	1088.53	1088.53	0	-1.1	21	Non	455.66	190.82	190.82	4.91	1125	>sp|P02817|AMELX_BOVIN Amelogenin, X isoform OS=Bos taurus OX=9913 GN=AMELX PE=1 SV=2	1	hf1_eb_18273_82_20032023.ScanId;v=1;d1=5239.5239.2	controllerType=0 controllerNumber=1 scan=5239	19.3439
04176:2	1	P.PHPGHPGYIN[+0.984].F		N[+1]	545.264	2	1089.52	1089.51	0	8.1	21	Non	146.95	146.95	146.95	0.65	1125	>sp|P02817|AMELX_BOVIN Amelogenin, X isoform OS=Bos taurus OX=9913 GN=AMELX PE=1 SV=2	1	hf1_eb_18273_82_20032023.ScanId;v=1;d1=5543.5543.2	controllerType=0 controllerNumber=1 scan=5543	20.0303
04669:2	1	P.PHPGHPGYIN[+0.984].F		N[+1]	545.257	2	1089.51	1089.51	0	-3.6	21	Non	330.28	187.41	187.41	4.54	1125	>sp|P02817|AMELX_BOVIN Amelogenin, X isoform OS=Bos taurus OX=9913 GN=AMELX PE=1 SV=2	1	hf1_eb_18273_82_20032023.ScanId;v=1;d1=5953.5953.2	controllerType=0 controllerNumber=1 scan=5953	20.9007
04344:2	1	P.PHPGHPGYIN[+0.984].F		N[+1]	545.26	2	1089.51	1089.51	0	0.8	21	Non	396.44	341.25	341.25	5.55	1125	>sp|P02817|AMELX_BOVIN Amelogenin, X isoform OS=Bos taurus OX=9913 GN=AMELX PE=1 SV=2	1	hf1_eb_18273_82_20032023.ScanId;v=1;d1=5692.5692.2	controllerType=0 controllerNumber=1 scan=5692	20.3713
05186:2	1	P.PHPGHPGYIN[+0.984].F		N[+1]	545.258	2	1089.51	1089.51	0	-2.6	21	Non	497.65	192.56	192.56	4.7	1125	>sp|P02817|AMELX_BOVIN Amelogenin, X isoform OS=Bos taurus OX=9913 GN=AMELX PE=1 SV=2	1	hf1_eb_18273_82_20032023.ScanId;v=1;d1=6382.6382.2	controllerType=0 controllerNumber=1 scan=6382	21.8051
04861:2	1	P.PHPGHPGYIN[+0.984].F		N[+1]	545.259	2	1089.51	1089.51	0	-0.5	21	Non	523.17	249.99	249.99	5.67	1125	>sp|P02817|AMELX_BOVIN Amelogenin, X isoform OS=Bos taurus OX=9913 GN=AMELX PE=1 SV=2	1	hf1_eb_18273_82_20032023.ScanId;v=1;d1=6113.6113.2	controllerType=0 controllerNumber=1 scan=6113	21.2396
12657:3	1	P.PHPGHPGYINF.S			412.536	3	1235.59	1235.6	0	-1.2	21	Non	160.25	160.25	160.25	1.83	1125	>sp|P02817|AMELX_BOVIN Amelogenin, X isoform OS=Bos taurus OX=9913 GN=AMELX PE=1 SV=2	1	hf1_eb_18273_82_20032023.ScanId;v=1;d1=12261.12261.2	controllerType=0 controllerNumber=1 scan=12261	33.4292
13101:3	1	P.PHPGHPGYINF.S			412.536	3	1235.59	1235.6	0	-1	21	Non	162.88	162.88	162.88	2.31	1125	>sp|P02817|AMELX_BOVIN Amelogenin, X isoform OS=Bos taurus OX=9913 GN=AMELX PE=1 SV=2	1	hf1_eb_18273_82_20032023.ScanId;v=1;d1=12586.12586.3	controllerType=0 controllerNumber=1 scan=12586	34.0202
12741:3	1	P.PHPGHPGYINF.S			412.537	3	1235.6	1235.6	0	0	21	Non	178.53	178.53	178.53	1.6	1125	>sp|P02817|AMELX_BOVIN Amelogenin, X isoform OS=Bos taurus OX=9913 GN=AMELX PE=1 SV=2	1	hf1_eb_18273_82_20032023.ScanId;v=1;d1=12322.12322.3	controllerType=0 controllerNumber=1 scan=12322	33.5446
13020:3	1	P.PHPGHPGYINF.S			412.536	3	1235.59	1235.6	0	-0.7	21	Non	215.38	215.38	215.38	2.47	1125	>sp|P02817|AMELX_BOVIN Amelogenin, X isoform OS=Bos taurus OX=9913 GN=AMELX PE=1 SV=2	1	hf1_eb_18273_82_20032023.ScanId;v=1;d1=12520.12520.3	controllerType=0 controllerNumber=1 scan=12520	33.8969
13828:3	1	P.PHPGHPGYINF.S			412.536	3	1235.59	1235.6	0	-1.7	21	Non	311.99	311.99	311.99	4.98	1125	>sp|P02817|AMELX_BOVIN Amelogenin, X isoform OS=Bos taurus OX=9913 GN=AMELX PE=1 SV=2	1	hf1_eb_18273_82_20032023.ScanId;v=1;d1=13132.13132.3	controllerType=0 controllerNumber=1 scan=13132	35.0087
13088:2	1	P.PHPGHPGYINF.S			618.301	2	1235.59	1235.6	0	-1.4	21	Non	339.58	339.58	339.58	4.99	1125	>sp|P02817|AMELX_BOVIN Amelogenin, X isoform OS=Bos taurus OX=9913 GN=AMELX PE=1 SV=2	1	hf1_eb_18273_82_20032023.ScanId;v=1;d1=12575.12575.2	controllerType=0 controllerNumber=1 scan=12575	33.9983
12978:2	1	P.PHPGHPGYINF.S			618.301	2	1235.59	1235.6	0	-1.2	21	Non	455.35	445.81	445.81	6.38	1125	>sp|P02817|AMELX_BOVIN Amelogenin, X isoform OS=Bos taurus OX=9913 GN=AMELX PE=1 SV=2	1	hf1_eb_18273_82_20032023.ScanId;v=1;d1=12492.12492.2	controllerType=0 controllerNumber=1 scan=12492	33.8484
13830:2	1	P.PHPGHPGYINF.S			618.3	2	1235.59	1235.6	0	-2.3	21	Non	560.91	549.39	549.39	6.7	1125	>sp|P02817|AMELX_BOVIN Amelogenin, X isoform OS=Bos taurus OX=9913 GN=AMELX PE=1 SV=2	1	hf1_eb_18273_82_20032023.ScanId;v=1;d1=13133.13133.2	controllerType=0 controllerNumber=1 scan=13133	35.0095
12516:3	1	P.PHPGHPGYIN[+0.984]F.S		N[+1]	412.864	3	1236.58	1236.58	0	-1.2	21	Non	202.69	202.69	202.69	2.47	1125	>sp|P02817|AMELX_BOVIN Amelogenin, X isoform OS=Bos taurus OX=9913 GN=AMELX PE=1 SV=2	1	hf1_eb_18273_82_20032023.ScanId;v=1;d1=12157.12157.3	controllerType=0 controllerNumber=1 scan=12157	33.2348
14386:3	1	P.PHPGHPGYIN[+0.984]F.S		N[+1]	412.865	3	1236.58	1236.58	0	-0.6	21	Non	247.34	247.34	247.34	4.15	1125	>sp|P02817|AMELX_BOVIN Amelogenin, X isoform OS=Bos taurus OX=9913 GN=AMELX PE=1 SV=2	1	hf1_eb_18273_82_20032023.ScanId;v=1;d1=13544.13544.3	controllerType=0 controllerNumber=1 scan=13544	35.7742
15119:3	1	P.PHPGHPGYIN[+0.984]F.S		N[+1]	412.864	3	1236.58	1236.58	0	-1.4	21	Non	290.8	290.8	290.8	4.43	1125	>sp|P02817|AMELX_BOVIN Amelogenin, X isoform OS=Bos taurus OX=9913 GN=AMELX PE=1 SV=2	1	hf1_eb_18273_82_20032023.ScanId;v=1;d1=14090.14090.3	controllerType=0 controllerNumber=1 scan=14090	36.8116
13441:3	1	P.PHPGHPGYIN[+0.984]F.S		N[+1]	412.864	3	1236.58	1236.58	0	-0.9	21	Non	302.68	302.68	302.68	4.43	1125	>sp|P02817|AMELX_BOVIN Amelogenin, X isoform OS=Bos taurus OX=9913 GN=AMELX PE=1 SV=2	1	hf1_eb_18273_82_20032023.ScanId;v=1;d1=12846.12846.3	controllerType=0 controllerNumber=1 scan=12846	34.4946
14870:3	1	P.PHPGHPGYIN[+0.984]F.S		N[+1]	412.864	3	1236.58	1236.58	0	-2	21	Non	307.94	307.94	307.94	4.98	1125	>sp|P02817|AMELX_BOVIN Amelogenin, X isoform OS=Bos taurus OX=9913 GN=AMELX PE=1 SV=2	1	hf1_eb_18273_82_20032023.ScanId;v=1;d1=13907.13907.3	controllerType=0 controllerNumber=1 scan=13907	36.4686
14642:3	1	P.PHPGHPGYIN[+0.984]F.S		N[+1]	412.865	3	1236.58	1236.58	0	0.1	21	Non	317.67	317.67	317.67	4.97	1125	>sp|P02817|AMELX_BOVIN Amelogenin, X isoform OS=Bos taurus OX=9913 GN=AMELX PE=1 SV=2	1	hf1_eb_18273_82_20032023.ScanId;v=1;d1=13733.13733.3	controllerType=0 controllerNumber=1 scan=13733	36.1272
13266:2	1	P.PHPGHPGYIN[+0.984]F.S		N[+1]	618.792	2	1236.58	1236.58	0	-2	21	Non	436.79	406.73	406.73	5.89	1125	>sp|P02817|AMELX_BOVIN Amelogenin, X isoform OS=Bos taurus OX=9913 GN=AMELX PE=1 SV=2	1	hf1_eb_18273_82_20032023.ScanId;v=1;d1=12711.12711.2	controllerType=0 controllerNumber=1 scan=12711	34.2486
15091:2	1	P.PHPGHPGYIN[+0.984]F.S		N[+1]	618.792	2	1236.58	1236.58	0	-1.7	21	Non	553.36	475.1	475.1	6.36	1125	>sp|P02817|AMELX_BOVIN Amelogenin, X isoform OS=Bos taurus OX=9913 GN=AMELX PE=1 SV=2	1	hf1_eb_18273_82_20032023.ScanId;v=1;d1=14070.14070.2	controllerType=0 controllerNumber=1 scan=14070	36.777
14360:2	1	P.PHPGHPGYIN[+0.984]F.S		N[+1]	618.793	2	1236.58	1236.58	0	-0.2	21	Non	570.14	522.07	522.07	7.47	1125	>sp|P02817|AMELX_BOVIN Amelogenin, X isoform OS=Bos taurus OX=9913 GN=AMELX PE=1 SV=2	1	hf1_eb_18273_82_20032023.ScanId;v=1;d1=13526.13526.2	controllerType=0 controllerNumber=1 scan=13526	35.7384
13513:2	1	P.PHPGHPGYIN[+0.984]F.S		N[+1]	618.793	2	1236.58	1236.58	0	-0.9	21	Non	589.31	478.52	478.52	7.05	1125	>sp|P02817|AMELX_BOVIN Amelogenin, X isoform OS=Bos taurus OX=9913 GN=AMELX PE=1 SV=2	1	hf1_eb_18273_82_20032023.ScanId;v=1;d1=12900.12900.2	controllerType=0 controllerNumber=1 scan=12900	34.5929
14615:2	1	P.PHPGHPGYIN[+0.984]F.S		N[+1]	618.793	2	1236.58	1236.58	0	-0.7	21	Non	611.98	590.4	590.4	8.47	1125	>sp|P02817|AMELX_BOVIN Amelogenin, X isoform OS=Bos taurus OX=9913 GN=AMELX PE=1 SV=2	1	hf1_eb_18273_82_20032023.ScanId;v=1;d1=13713.13713.2	controllerType=0 controllerNumber=1 scan=13713	36.0914
14848:2	1	P.PHPGHPGYIN[+0.984]F.S		N[+1]	618.793	2	1236.58	1236.58	0	-1.5	21	Non	631.82	564.76	564.76	8.47	1125	>sp|P02817|AMELX_BOVIN Amelogenin, X isoform OS=Bos taurus OX=9913 GN=AMELX PE=1 SV=2	1	hf1_eb_18273_82_20032023.ScanId;v=1;d1=13889.13889.2	controllerType=0 controllerNumber=1 scan=13889	36.433
12226:3	1	P.PHPGHP[+15.995]GYIN[+0.984]F.S		N[+1], P[+16]	418.196	3	1252.57	1252.57	0	-0.3	21	Non	203.05	109.33	29.47	0.92	1125	>sp|P02817|AMELX_BOVIN Amelogenin, X isoform OS=Bos taurus OX=9913 GN=AMELX PE=1 SV=2	1	hf1_eb_18273_82_20032023.ScanId;v=1;d1=11937.11937.2	controllerType=0 controllerNumber=1 scan=11937	32.8172
13537:3	1	P.PHPGHP[+15.995]GYIN[+0.984]F.S		N[+1], P[+16]	418.196	3	1252.57	1252.57	0	-1.3	21	Non	252.6	156.05	36.64	2.7	1125	>sp|P02817|AMELX_BOVIN Amelogenin, X isoform OS=Bos taurus OX=9913 GN=AMELX PE=1 SV=2	1	hf1_eb_18273_82_20032023.ScanId;v=1;d1=12919.12919.3	controllerType=0 controllerNumber=1 scan=12919	34.6247
19439:2	1	P.PHPGH[+15.995]PGYIN[+0.984]F.S		H[+16], N[+1]	626.79	2	1252.57	1252.57	0	-1.2	21	Non	446.77	354.48	41.47	5.57	1125	>sp|P02817|AMELX_BOVIN Amelogenin, X isoform OS=Bos taurus OX=9913 GN=AMELX PE=1 SV=2	1	hf1_eb_18273_82_20032023.ScanId;v=1;d1=17244.17244.2	controllerType=0 controllerNumber=1 scan=17244	42.4391
19322:2	1	P.P[+31.990]HPGHPGYIN[+0.984]F.S		N[+1], P[+32]	634.788	2	1268.57	1268.57	0	-0.9	21	Non	447.63	291.56	112.39	5.58	1125	>sp|P02817|AMELX_BOVIN Amelogenin, X isoform OS=Bos taurus OX=9913 GN=AMELX PE=1 SV=2	1	hf1_eb_18273_82_20032023.ScanId;v=1;d1=17150.17150.2	controllerType=0 controllerNumber=1 scan=17150	42.2579
13951:2	1	P.PHPGHPGYIN[+0.984]FS.Y		N[+1]	662.308	2	1323.61	1323.61	0	-3	21	Non	150.66	144.02	144.02	1.15	1125	>sp|P02817|AMELX_BOVIN Amelogenin, X isoform OS=Bos taurus OX=9913 GN=AMELX PE=1 SV=2	1	hf1_eb_18273_82_20032023.ScanId;v=1;d1=13224.13224.2	controllerType=0 controllerNumber=1 scan=13224	35.1781
13810:3	1	P.PHPGHPGYIN[+0.984]FS.Y		N[+1]	441.875	3	1323.61	1323.61	0	-1.9	21	Non	263.76	263.76	263.76	3.81	1125	>sp|P02817|AMELX_BOVIN Amelogenin, X isoform OS=Bos taurus OX=9913 GN=AMELX PE=1 SV=2	1	hf1_eb_18273_82_20032023.ScanId;v=1;d1=13119.13119.3	controllerType=0 controllerNumber=1 scan=13119	34.9847
13806:2	1	P.PHPGHPGYIN[+0.984]FS.Y		N[+1]	662.307	2	1323.61	1323.61	0	-4.6	21	Non	357.18	323.25	323.25	4.34	1125	>sp|P02817|AMELX_BOVIN Amelogenin, X isoform OS=Bos taurus OX=9913 GN=AMELX PE=1 SV=2	1	hf1_eb_18273_82_20032023.ScanId;v=1;d1=13117.13117.2	controllerType=0 controllerNumber=1 scan=13117	34.9822
13268:2	1	P.PHPGHPGYIN[+0.984]FS.Y		N[+1]	662.309	2	1323.61	1323.61	0	-1	21	Non	498.65	429.85	429.85	6.4	1125	>sp|P02817|AMELX_BOVIN Amelogenin, X isoform OS=Bos taurus OX=9913 GN=AMELX PE=1 SV=2	1	hf1_eb_18273_82_20032023.ScanId;v=1;d1=12713.12713.2	controllerType=0 controllerNumber=1 scan=12713	34.2515
15182:2	1	P.PHPGHPGYINFS[+79.966].Y		S[+80]	701.799	2	1402.59	1402.59	0	-2.4	21	Non	552.28	521.13	343.61	6.66	1125	>sp|P02817|AMELX_BOVIN Amelogenin, X isoform OS=Bos taurus OX=9913 GN=AMELX PE=1 SV=2	1	hf1_eb_18273_82_20032023.ScanId;v=1;d1=14137.14137.2	controllerType=0 controllerNumber=1 scan=14137	36.8997
16622:3	1	P.PHPGHPGYIN[+0.984]FS[+79.966].Y		N[+1], S[+80]	468.53	3	1403.58	1403.58	0	-1.1	21	Non	325.8	286.95	259.91	4.95	1125	>sp|P02817|AMELX_BOVIN Amelogenin, X isoform OS=Bos taurus OX=9913 GN=AMELX PE=1 SV=2	1	hf1_eb_18273_82_20032023.ScanId;v=1;d1=15161.15161.3	controllerType=0 controllerNumber=1 scan=15161	38.7198
15086:2	1	P.PHPGHPGYIN[+0.984]FS[+79.966].Y		N[+1], S[+80]	702.292	2	1403.58	1403.58	0	-1.6	21	Non	519.42	494.19	345.17	6.93	1125	>sp|P02817|AMELX_BOVIN Amelogenin, X isoform OS=Bos taurus OX=9913 GN=AMELX PE=1 SV=2	1	hf1_eb_18273_82_20032023.ScanId;v=1;d1=14066.14066.2	controllerType=0 controllerNumber=1 scan=14066	36.7683
16154:2	1	P.PHPGHPGYIN[+0.984]FS[+79.966].Y		N[+1], S[+80]	702.293	2	1403.58	1403.58	0	0	21	Non	529.19	461.7	314.12	6.59	1125	>sp|P02817|AMELX_BOVIN Amelogenin, X isoform OS=Bos taurus OX=9913 GN=AMELX PE=1 SV=2	1	hf1_eb_18273_82_20032023.ScanId;v=1;d1=14828.14828.2	controllerType=0 controllerNumber=1 scan=14828	38.1388
16734:2	1	P.PHPGHPGYIN[+0.984]FS[+79.966].Y		N[+1], S[+80]	702.292	2	1403.58	1403.58	0	-1.4	21	Non	625.58	569.37	393.27	8.47	1125	>sp|P02817|AMELX_BOVIN Amelogenin, X isoform OS=Bos taurus OX=9913 GN=AMELX PE=1 SV=2	1	hf1_eb_18273_82_20032023.ScanId;v=1;d1=15239.15239.2	controllerType=0 controllerNumber=1 scan=15239	38.8467
15329:2	1	P.PHPGHP[+15.995]GYIN[+0.984]FS[+79.966].Y		N[+1], P[+16], S[+80]	710.289	2	1419.57	1419.57	0	-2.1	21	Non	324.32	324.32	0	5.07	1125	>sp|P02817|AMELX_BOVIN Amelogenin, X isoform OS=Bos taurus OX=9913 GN=AMELX PE=1 SV=2	1	hf1_eb_18273_82_20032023.ScanId;v=1;d1=14251.14251.2	controllerType=0 controllerNumber=1 scan=14251	37.1124
21775:3	1	P.PHPGHPGYIN[+0.984]FS[+79.966]Y.E		N[+1], S[+80]	522.885	3	1566.64	1566.64	0	-1.5	21	Non	116.1	65.01	65.01	0.79	1125	>sp|P02817|AMELX_BOVIN Amelogenin, X isoform OS=Bos taurus OX=9913 GN=AMELX PE=1 SV=2	1	hf1_eb_18273_82_20032023.ScanId;v=1;d1=18981.18981.3	controllerType=0 controllerNumber=1 scan=18981	45.6363
21746:2	1	P.PHPGHPGYIN[+0.984]FS[+79.966]Y.E		N[+1], S[+80]	783.824	2	1566.64	1566.64	0	-0.5	21	Non	317.37	269.75	197.48	5.63	1125	>sp|P02817|AMELX_BOVIN Amelogenin, X isoform OS=Bos taurus OX=9913 GN=AMELX PE=1 SV=2	1	hf1_eb_18273_82_20032023.ScanId;v=1;d1=18961.18961.2	controllerType=0 controllerNumber=1 scan=18961	45.6021
16769:2	1	P.PHPGHPGYIN[+0.984]F[+31.990]SYE.V		F[+32], N[+1]	824.351	2	1647.69	1647.71	0	-7.5	21	Non	129.28	129.28	0	1.15	1125	>sp|P02817|AMELX_BOVIN Amelogenin, X isoform OS=Bos taurus OX=9913 GN=AMELX PE=1 SV=2	1	hf1_eb_18273_82_20032023.ScanId;v=1;d1=15262.15262.2	controllerType=0 controllerNumber=1 scan=15262	38.8842
20580:3	1	P.PHPGHPGYIN[+0.984]FS[+79.966]YE.V		N[+1], S[+80]	565.899	3	1695.68	1695.68	0	-1.3	21	Non	204.74	176.7	152.32	2.42	1125	>sp|P02817|AMELX_BOVIN Amelogenin, X isoform OS=Bos taurus OX=9913 GN=AMELX PE=1 SV=2	1	hf1_eb_18273_82_20032023.ScanId;v=1;d1=18121.18121.3	controllerType=0 controllerNumber=1 scan=18121	44.0731
16671:2	1	P.PHPGHPGYIN[+0.984]F[+31.990]SYE.V		F[+32], N[+1]	824.351	2	1647.69	1647.71	0	-8.1	21	Non	206.98	206.98	0	2.33	1125	>sp|P02817|AMELX_BOVIN Amelogenin, X isoform OS=Bos taurus OX=9913 GN=AMELX PE=1 SV=2	1	hf1_eb_18273_82_20032023.ScanId;v=1;d1=15193.15193.2	controllerType=0 controllerNumber=1 scan=15193	38.7705
16482:2	1	P.P[+15.995]HPGHP[+31.990]GYINFS[+79.966]YE.V		P[+16][+32], S[+80]	871.843	2	1742.68	1742.68	0	-3	21	Non	67.1	67.1	0	0.9	1125	>sp|P02817|AMELX_BOVIN Amelogenin, X isoform OS=Bos taurus OX=9913 GN=AMELX PE=1 SV=2	1	hf1_eb_18273_82_20032023.ScanId;v=1;d1=15064.15064.2	controllerType=0 controllerNumber=1 scan=15064	38.5518
28094:2	1	P.PHPGHPGYIN[+0.984]FS[+79.966]YEVL.T		N[+1], S[+80]	954.425	2	1907.84	1907.84	0	3.7	21	Non	54.66	54.66	54.66	1.04	1125	>sp|P02817|AMELX_BOVIN Amelogenin, X isoform OS=Bos taurus OX=9913 GN=AMELX PE=1 SV=2	1	hf1_eb_18273_82_20032023.ScanId;v=1;d1=23452.23452.2	controllerType=0 controllerNumber=1 scan=23452	53.7495
32864:3	1	P.PHPGHPGYINFS[+79.966]YEVLTPL.K		S[+80]	740.015	3	2218.03	2218.04	0	-2.3	21	Non	165.28	165.28	43.98	2.39	1125	>sp|P02817|AMELX_BOVIN Amelogenin, X isoform OS=Bos taurus OX=9913 GN=AMELX PE=1 SV=2	1	hf1_eb_18273_82_20032023.ScanId;v=1;d1=26807.26807.3	controllerType=0 controllerNumber=1 scan=26807	59.8557
33770:3	1	P.PHPGHPGYIN[+0.984]FS[+79.966]YEVLTPL.K		N[+1], S[+80]	740.345	3	2219.02	2219.02	0	0	21	Non	55.16	55.16	24.51	1.2	1125	>sp|P02817|AMELX_BOVIN Amelogenin, X isoform OS=Bos taurus OX=9913 GN=AMELX PE=1 SV=2	1	hf1_eb_18273_82_20032023.ScanId;v=1;d1=27436.27436.3	controllerType=0 controllerNumber=1 scan=27436	61.0307
33152:3	1	P.PHPGHPGYIN[+0.984]FS[+79.966]YEVLTPL.K		N[+1], S[+80]	740.345	3	2219.02	2219.02	0	0.2	21	Non	64.03	64.03	42.97	0.65	1125	>sp|P02817|AMELX_BOVIN Amelogenin, X isoform OS=Bos taurus OX=9913 GN=AMELX PE=1 SV=2	1	hf1_eb_18273_82_20032023.ScanId;v=1;d1=26996.26996.3	controllerType=0 controllerNumber=1 scan=26996	60.2026
32865:3	1	P.PHPGHPGYIN[+0.984]FS[+79.966]YEVLTPL.K		N[+1], S[+80]	740.346	3	2219.02	2219.02	0	1.4	21	Non	111.61	111.61	30.51	1.45	1125	>sp|P02817|AMELX_BOVIN Amelogenin, X isoform OS=Bos taurus OX=9913 GN=AMELX PE=1 SV=2	1	hf1_eb_18273_82_20032023.ScanId;v=1;d1=26807.26807.3	controllerType=0 controllerNumber=1 scan=26807	59.8557
32970:2	1	P.PHPGHPGYIN[+0.984]FS[+79.966]YEVLTPL.K		N[+1], S[+80]	1110.02	2	2219.03	2219.02	0	3.3	21	Non	119.77	119.77	103.93	1.31	1125	>sp|P02817|AMELX_BOVIN Amelogenin, X isoform OS=Bos taurus OX=9913 GN=AMELX PE=1 SV=2	1	hf1_eb_18273_82_20032023.ScanId;v=1;d1=26878.26878.2	controllerType=0 controllerNumber=1 scan=26878	59.9864
27777:3	1	P.PHPGHPGYINFS[+79.966]YEVLTPLK.W		S[+80]	782.711	3	2346.12	2346.13	0	-5.2	21	NRagged	177.26	177.26	67.93	3.46	1125	>sp|P02817|AMELX_BOVIN Amelogenin, X isoform OS=Bos taurus OX=9913 GN=AMELX PE=1 SV=2	1	hf1_eb_18273_82_20032023.ScanId;v=1;d1=23244.23244.3	controllerType=0 controllerNumber=1 scan=23244	53.382
27778:3	1	P.PHPGHPGYIN[+0.984]FS[+79.966]YEVLTPLK.W		N[+1], S[+80]	783.046	3	2347.12	2347.12	0	2.7	21	NRagged	266.44	266.44	101.32	5.26	1125	>sp|P02817|AMELX_BOVIN Amelogenin, X isoform OS=Bos taurus OX=9913 GN=AMELX PE=1 SV=2	1	hf1_eb_18273_82_20032023.ScanId;v=1;d1=23244.23244.3	controllerType=0 controllerNumber=1 scan=23244	53.382
28321:3	1	P.PHPGHPGYIN[+0.984]FS[+79.966]YEVLTPLK.W		N[+1], S[+80]	783.044	3	2347.12	2347.12	0	0.6	21	NRagged	371.41	371.41	153.49	7.69	1125	>sp|P02817|AMELX_BOVIN Amelogenin, X isoform OS=Bos taurus OX=9913 GN=AMELX PE=1 SV=2	1	hf1_eb_18273_82_20032023.ScanId;v=1;d1=23612.23612.3	controllerType=0 controllerNumber=1 scan=23612	54.0337
28623:3	1	P.PHPGHPGYIN[+0.984]FS[+79.966]YEVLTPLK.W		N[+1], S[+80]	783.043	3	2347.12	2347.12	0	-0.1	21	NRagged	1059.85	1059.85	567.93	18.68	1125	>sp|P02817|AMELX_BOVIN Amelogenin, X isoform OS=Bos taurus OX=9913 GN=AMELX PE=1 SV=2	1	hf1_eb_18273_82_20032023.ScanId;v=1;d1=23815.23815.3	controllerType=0 controllerNumber=1 scan=23815	54.3901
26984:3	1	P.PHPGHP[+31.990]GY[+31.990]INFSY[+15.995]EVLTPLK.W		P[+32], Y[+16][+32]	782.714	3	2346.13	2346.14	0	-5.1	21	NRagged	50.78	50.78	0	1.7	1125	>sp|P02817|AMELX_BOVIN Amelogenin, X isoform OS=Bos taurus OX=9913 GN=AMELX PE=1 SV=2	1	hf1_eb_18273_82_20032023.ScanId;v=1;d1=22702.22702.3	controllerType=0 controllerNumber=1 scan=22702	52.4097
27976:3	1	P.PHPGHPGY[+15.995]IN[+0.984]FS[+79.966]YEVLTPLK.W		N[+1], S[+80], Y[+16]	788.375	3	2363.11	2363.11	0	0.4	21	NRagged	135.08	135.08	16.93	3.12	1125	>sp|P02817|AMELX_BOVIN Amelogenin, X isoform OS=Bos taurus OX=9913 GN=AMELX PE=1 SV=2	1	hf1_eb_18273_82_20032023.ScanId;v=1;d1=23375.23375.3	controllerType=0 controllerNumber=1 scan=23375	53.6142
01281:2	1	P.HPGHPGY.I			382.676	2	764.346	764.347	0	-2.4	22	Non	243.19	243.19	243.19	4.03	1125	>sp|P02817|AMELX_BOVIN Amelogenin, X isoform OS=Bos taurus OX=9913 GN=AMELX PE=1 SV=2	1	hf1_eb_18273_82_20032023.ScanId;v=1;d1=3264.3264.4	controllerType=0 controllerNumber=1 scan=3264	15.5944
01142:2	1	P.HPGHPGY.I			382.677	2	764.346	764.347	0	-1.7	22	Non	464.65	390.31	390.31	6.12	1125	>sp|P02817|AMELX_BOVIN Amelogenin, X isoform OS=Bos taurus OX=9913 GN=AMELX PE=1 SV=2	1	hf1_eb_18273_82_20032023.ScanId;v=1;d1=3173.3173.2	controllerType=0 controllerNumber=1 scan=3173	15.4367
04587:2	1	P.HPGHPGYI.N			439.219	2	877.431	877.432	0	-0.1	22	Non	491.86	369.09	369.09	6.16	1125	>sp|P02817|AMELX_BOVIN Amelogenin, X isoform OS=Bos taurus OX=9913 GN=AMELX PE=1 SV=2	1	hf1_eb_18273_82_20032023.ScanId;v=1;d1=5891.5891.2	controllerType=0 controllerNumber=1 scan=5891	20.782
03928:2	1	P.HPGHPGYIN[+0.984].F		N[+1]	496.732	2	992.457	992.458	0	-1.3	22	Non	471.38	346.66	346.66	5.45	1125	>sp|P02817|AMELX_BOVIN Amelogenin, X isoform OS=Bos taurus OX=9913 GN=AMELX PE=1 SV=2	1	hf1_eb_18273_82_20032023.ScanId;v=1;d1=5322.5322.2	controllerType=0 controllerNumber=1 scan=5322	19.5108
13601:3	1	P.HPGHPGYINF.S			380.186	3	1138.54	1138.54	0	0.6	22	Non	216.3	216.3	216.3	2.46	1125	>sp|P02817|AMELX_BOVIN Amelogenin, X isoform OS=Bos taurus OX=9913 GN=AMELX PE=1 SV=2	1	hf1_eb_18273_82_20032023.ScanId;v=1;d1=12967.12967.3	controllerType=0 controllerNumber=1 scan=12967	34.7044
12613:2	1	P.HPGHPGYINF.S			569.775	2	1138.54	1138.54	0	-0.7	22	Non	359.82	339.71	339.71	5.54	1125	>sp|P02817|AMELX_BOVIN Amelogenin, X isoform OS=Bos taurus OX=9913 GN=AMELX PE=1 SV=2	1	hf1_eb_18273_82_20032023.ScanId;v=1;d1=12226.12226.2	controllerType=0 controllerNumber=1 scan=12226	33.3654
13650:2	1	P.HPGHPGYINF.S			569.774	2	1138.54	1138.54	0	-1	22	Non	498.08	498.08	498.08	6.28	1125	>sp|P02817|AMELX_BOVIN Amelogenin, X isoform OS=Bos taurus OX=9913 GN=AMELX PE=1 SV=2	1	hf1_eb_18273_82_20032023.ScanId;v=1;d1=13002.13002.2	controllerType=0 controllerNumber=1 scan=13002	34.7678
19984:2	1	P.HPGHPGYIN[+0.984]F.S		N[+1]	570.27	2	1139.53	1139.53	0	4.6	22	Non	172.83	162.1	162.1	0.86	1125	>sp|P02817|AMELX_BOVIN Amelogenin, X isoform OS=Bos taurus OX=9913 GN=AMELX PE=1 SV=2	1	hf1_eb_18273_82_20032023.ScanId;v=1;d1=17647.17647.3	controllerType=0 controllerNumber=1 scan=17647	43.176
19709:2	1	P.HPGHPGYIN[+0.984]F.S		N[+1]	570.27	2	1139.53	1139.53	0	5.6	22	Non	201.94	201.94	201.94	1.76	1125	>sp|P02817|AMELX_BOVIN Amelogenin, X isoform OS=Bos taurus OX=9913 GN=AMELX PE=1 SV=2	1	hf1_eb_18273_82_20032023.ScanId;v=1;d1=17449.17449.3	controllerType=0 controllerNumber=1 scan=17449	42.8208
15149:2	1	P.HPGHPGYIN[+0.984]F.S		N[+1]	570.267	2	1139.53	1139.53	0	-0.6	22	Non	230.95	155.7	155.7	1.42	1125	>sp|P02817|AMELX_BOVIN Amelogenin, X isoform OS=Bos taurus OX=9913 GN=AMELX PE=1 SV=2	1	hf1_eb_18273_82_20032023.ScanId;v=1;d1=14112.14112.2	controllerType=0 controllerNumber=1 scan=14112	36.8548
14809:3	1	P.HPGHPGYIN[+0.984]F.S		N[+1]	380.513	3	1139.52	1139.53	0	-2.8	22	Non	249.34	249.34	249.34	3.35	1125	>sp|P02817|AMELX_BOVIN Amelogenin, X isoform OS=Bos taurus OX=9913 GN=AMELX PE=1 SV=2	1	hf1_eb_18273_82_20032023.ScanId;v=1;d1=13861.13861.3	controllerType=0 controllerNumber=1 scan=13861	36.374
12084:3	1	P.HPGHPGYIN[+0.984]F.S		N[+1]	380.513	3	1139.52	1139.53	0	-2.2	22	Non	249.8	249.8	249.8	3.81	1125	>sp|P02817|AMELX_BOVIN Amelogenin, X isoform OS=Bos taurus OX=9913 GN=AMELX PE=1 SV=2	1	hf1_eb_18273_82_20032023.ScanId;v=1;d1=11830.11830.3	controllerType=0 controllerNumber=1 scan=11830	32.6135
13121:3	1	P.HPGHPGYIN[+0.984]F.S		N[+1]	380.513	3	1139.53	1139.53	0	-1	22	Non	253.01	253.01	253.01	3.69	1125	>sp|P02817|AMELX_BOVIN Amelogenin, X isoform OS=Bos taurus OX=9913 GN=AMELX PE=1 SV=2	1	hf1_eb_18273_82_20032023.ScanId;v=1;d1=12599.12599.3	controllerType=0 controllerNumber=1 scan=12599	34.0416
14559:3	1	P.HPGHPGYIN[+0.984]F.S		N[+1]	380.514	3	1139.53	1139.53	0	-0.6	22	Non	296.14	280.42	280.42	4.31	1125	>sp|P02817|AMELX_BOVIN Amelogenin, X isoform OS=Bos taurus OX=9913 GN=AMELX PE=1 SV=2	1	hf1_eb_18273_82_20032023.ScanId;v=1;d1=13674.13674.3	controllerType=0 controllerNumber=1 scan=13674	36.0195
14314:3	1	P.HPGHPGYIN[+0.984]F.S		N[+1]	380.514	3	1139.53	1139.53	0	-0.9	22	Non	296.21	296.21	296.21	4.43	1125	>sp|P02817|AMELX_BOVIN Amelogenin, X isoform OS=Bos taurus OX=9913 GN=AMELX PE=1 SV=2	1	hf1_eb_18273_82_20032023.ScanId;v=1;d1=13491.13491.3	controllerType=0 controllerNumber=1 scan=13491	35.6693
14233:2	1	P.HPGHPGYIN[+0.984]F.S		N[+1]	570.267	2	1139.53	1139.53	0	-0.4	22	Non	367.46	338.41	338.41	5.69	1125	>sp|P02817|AMELX_BOVIN Amelogenin, X isoform OS=Bos taurus OX=9913 GN=AMELX PE=1 SV=2	1	hf1_eb_18273_82_20032023.ScanId;v=1;d1=13430.13430.2	controllerType=0 controllerNumber=1 scan=13430	35.5532
14740:2	1	P.HPGHPGYIN[+0.984]F.S		N[+1]	570.266	2	1139.53	1139.53	0	-1.3	22	Non	443.72	418.09	418.09	6.38	1125	>sp|P02817|AMELX_BOVIN Amelogenin, X isoform OS=Bos taurus OX=9913 GN=AMELX PE=1 SV=2	1	hf1_eb_18273_82_20032023.ScanId;v=1;d1=13804.13804.2	controllerType=0 controllerNumber=1 scan=13804	36.2557
13104:2	1	P.HPGHPGYIN[+0.984]F.S		N[+1]	570.266	2	1139.52	1139.53	0	-1.8	22	Non	504.99	462.66	462.66	6.51	1125	>sp|P02817|AMELX_BOVIN Amelogenin, X isoform OS=Bos taurus OX=9913 GN=AMELX PE=1 SV=2	1	hf1_eb_18273_82_20032023.ScanId;v=1;d1=12588.12588.2	controllerType=0 controllerNumber=1 scan=12588	34.0232
14482:2	1	P.HPGHPGYIN[+0.984]F.S		N[+1]	570.267	2	1139.53	1139.53	0	0.4	22	Non	604.06	557.17	557.17	8.03	1125	>sp|P02817|AMELX_BOVIN Amelogenin, X isoform OS=Bos taurus OX=9913 GN=AMELX PE=1 SV=2	1	hf1_eb_18273_82_20032023.ScanId;v=1;d1=13614.13614.2	controllerType=0 controllerNumber=1 scan=13614	35.9072
14303:2	1	P.HPGH[+15.995]PGYIN[+0.984]F.S		H[+16], N[+1]	578.264	2	1155.52	1155.52	0	-0.1	22	Non	81.28	73.79	20.02	0.6	1125	>sp|P02817|AMELX_BOVIN Amelogenin, X isoform OS=Bos taurus OX=9913 GN=AMELX PE=1 SV=2	1	hf1_eb_18273_82_20032023.ScanId;v=1;d1=13484.13484.2	controllerType=0 controllerNumber=1 scan=13484	35.6568
12113:2	1	P.HPGHP[+15.995]GYIN[+0.984]F.S		N[+1], P[+16]	578.266	2	1155.52	1155.52	0	2	22	Non	145.06	89.45	25.17	0.76	1125	>sp|P02817|AMELX_BOVIN Amelogenin, X isoform OS=Bos taurus OX=9913 GN=AMELX PE=1 SV=2	1	hf1_eb_18273_82_20032023.ScanId;v=1;d1=11849.11849.4	controllerType=0 controllerNumber=1 scan=11849	32.6459
14935:2	1	P.HPGHPGYINFS[+79.966].Y		S[+80]	653.275	2	1305.54	1305.54	0	0.5	22	Non	414.38	367.51	278.19	6.34	1125	>sp|P02817|AMELX_BOVIN Amelogenin, X isoform OS=Bos taurus OX=9913 GN=AMELX PE=1 SV=2	1	hf1_eb_18273_82_20032023.ScanId;v=1;d1=13954.13954.2	controllerType=0 controllerNumber=1 scan=13954	36.5579
14956:2	1	P.HPGHPGYINFS[+79.966].Y		S[+80]	653.273	2	1305.54	1305.54	0	-2	22	Non	440.69	408.05	312.75	5.91	1125	>sp|P02817|AMELX_BOVIN Amelogenin, X isoform OS=Bos taurus OX=9913 GN=AMELX PE=1 SV=2	1	hf1_eb_18273_82_20032023.ScanId;v=1;d1=13968.13968.2	controllerType=0 controllerNumber=1 scan=13968	36.5836
15112:2	1	P.HPGHPGYIN[+0.984]FS[+79.966].Y		N[+1], S[+80]	653.764	2	1306.52	1306.53	0	-3.1	22	Non	368.78	221.99	221.99	4.94	1125	>sp|P02817|AMELX_BOVIN Amelogenin, X isoform OS=Bos taurus OX=9913 GN=AMELX PE=1 SV=2	1	hf1_eb_18273_82_20032023.ScanId;v=1;d1=14085.14085.2	controllerType=0 controllerNumber=1 scan=14085	36.8022
16418:2	1	P.HPGHPGYIN[+0.984]FS[+79.966].Y		N[+1], S[+80]	653.764	2	1306.52	1306.53	0	-2.8	22	Non	430.64	272.29	272.29	5.2	1125	>sp|P02817|AMELX_BOVIN Amelogenin, X isoform OS=Bos taurus OX=9913 GN=AMELX PE=1 SV=2	1	hf1_eb_18273_82_20032023.ScanId;v=1;d1=15015.15015.2	controllerType=0 controllerNumber=1 scan=15015	38.4659
19512:2	1	P.HPGHPGYINFSY.E			694.822	2	1388.64	1388.64	0	-0.4	22	Non	48.11	48.11	48.11	0.61	1125	>sp|P02817|AMELX_BOVIN Amelogenin, X isoform OS=Bos taurus OX=9913 GN=AMELX PE=1 SV=2	1	hf1_eb_18273_82_20032023.ScanId;v=1;d1=17302.17302.2	controllerType=0 controllerNumber=1 scan=17302	42.5482
21887:2	1	P.HPGHPGYIN[+0.984]FS[+79.966]Y.E		N[+1], S[+80]	735.297	2	1469.59	1469.59	0	-1.8	22	Non	104.5	104.5	104.5	1.29	1125	>sp|P02817|AMELX_BOVIN Amelogenin, X isoform OS=Bos taurus OX=9913 GN=AMELX PE=1 SV=2	1	hf1_eb_18273_82_20032023.ScanId;v=1;d1=19069.19069.2	controllerType=0 controllerNumber=1 scan=19069	45.7937
27708:3	1	P.HPGHPGYINFS[+79.966]YEVLTPLK.W		S[+80]	750.364	3	2249.08	2249.08	0	-0.6	22	NRagged	385.05	385.05	166.36	7.64	1125	>sp|P02817|AMELX_BOVIN Amelogenin, X isoform OS=Bos taurus OX=9913 GN=AMELX PE=1 SV=2	1	hf1_eb_18273_82_20032023.ScanId;v=1;d1=23194.23194.3	controllerType=0 controllerNumber=1 scan=23194	53.2914
28754:3	1	P.HPGHPGYIN[+0.984]FS[+79.966]YEVLTPLK.W		N[+1], S[+80]	750.693	3	2250.06	2250.06	0	0.1	22	NRagged	391.26	391.26	217.73	8.04	1125	>sp|P02817|AMELX_BOVIN Amelogenin, X isoform OS=Bos taurus OX=9913 GN=AMELX PE=1 SV=2	1	hf1_eb_18273_82_20032023.ScanId;v=1;d1=23907.23907.3	controllerType=0 controllerNumber=1 scan=23907	54.553
06072:2	1	H.PGHPGYIN[+0.984].F		N[+1]	428.203	2	855.399	855.399	0	-0.2	23	Non	402.28	392.08	392.08	5.74	1125	>sp|P02817|AMELX_BOVIN Amelogenin, X isoform OS=Bos taurus OX=9913 GN=AMELX PE=1 SV=2	1	hf1_eb_18273_82_20032023.ScanId;v=1;d1=7130.7130.2	controllerType=0 controllerNumber=1 scan=7130	23.3763
04708:2	1	H.PGHP[+15.995]GYIN[+0.984].F		N[+1], P[+16]	436.2	2	871.393	871.394	0	-1.3	23	Non	293.2	260.83	49.03	3.6	1125	>sp|P02817|AMELX_BOVIN Amelogenin, X isoform OS=Bos taurus OX=9913 GN=AMELX PE=1 SV=2	1	hf1_eb_18273_82_20032023.ScanId;v=1;d1=5985.5985.2	controllerType=0 controllerNumber=1 scan=5985	20.9715
16454:2	1	H.PGHPGYINF.S			501.245	2	1001.48	1001.48	0	-1	23	Non	318.67	302.3	302.3	4.19	1125	>sp|P02817|AMELX_BOVIN Amelogenin, X isoform OS=Bos taurus OX=9913 GN=AMELX PE=1 SV=2	1	hf1_eb_18273_82_20032023.ScanId;v=1;d1=15043.15043.2	controllerType=0 controllerNumber=1 scan=15043	38.5138
16101:2	1	H.PGHPGYIN[+0.984]F.S		N[+1]	501.737	2	1002.47	1002.47	0	-1	23	Non	226.95	200.1	200.1	2.2	1125	>sp|P02817|AMELX_BOVIN Amelogenin, X isoform OS=Bos taurus OX=9913 GN=AMELX PE=1 SV=2	1	hf1_eb_18273_82_20032023.ScanId;v=1;d1=14791.14791.3	controllerType=0 controllerNumber=1 scan=14791	38.0765
18670:2	1	H.PGHPGYIN[+0.984]F.S		N[+1]	501.738	2	1002.47	1002.47	0	0	23	Non	276.87	225.68	225.68	3.3	1125	>sp|P02817|AMELX_BOVIN Amelogenin, X isoform OS=Bos taurus OX=9913 GN=AMELX PE=1 SV=2	1	hf1_eb_18273_82_20032023.ScanId;v=1;d1=16693.16693.2	controllerType=0 controllerNumber=1 scan=16693	41.4454
18019:2	1	H.PGHPGYIN[+0.984]F.S		N[+1]	501.736	2	1002.46	1002.47	0	-3.2	23	Non	378.83	281.13	281.13	3.95	1125	>sp|P02817|AMELX_BOVIN Amelogenin, X isoform OS=Bos taurus OX=9913 GN=AMELX PE=1 SV=2	1	hf1_eb_18273_82_20032023.ScanId;v=1;d1=16204.16204.3	controllerType=0 controllerNumber=1 scan=16204	40.5731
16145:2	1	H.PGHPGYIN[+0.984]F.S		N[+1]	501.737	2	1002.47	1002.47	0	-1.1	23	Non	421.37	359.05	359.05	4.94	1125	>sp|P02817|AMELX_BOVIN Amelogenin, X isoform OS=Bos taurus OX=9913 GN=AMELX PE=1 SV=2	1	hf1_eb_18273_82_20032023.ScanId;v=1;d1=14824.14824.2	controllerType=0 controllerNumber=1 scan=14824	38.1333
18612:2	1	H.PGHPGYIN[+0.984]F.S		N[+1]	501.737	2	1002.47	1002.47	0	-0.9	23	Non	434.45	361.13	361.13	5.63	1125	>sp|P02817|AMELX_BOVIN Amelogenin, X isoform OS=Bos taurus OX=9913 GN=AMELX PE=1 SV=2	1	hf1_eb_18273_82_20032023.ScanId;v=1;d1=16651.16651.2	controllerType=0 controllerNumber=1 scan=16651	41.3734
19167:2	1	H.PGHPGYIN[+0.984]F.S		N[+1]	501.737	2	1002.47	1002.47	0	-0.9	23	Non	437.39	358.77	358.77	4.39	1125	>sp|P02817|AMELX_BOVIN Amelogenin, X isoform OS=Bos taurus OX=9913 GN=AMELX PE=1 SV=2	1	hf1_eb_18273_82_20032023.ScanId;v=1;d1=17036.17036.2	controllerType=0 controllerNumber=1 scan=17036	42.0547
17979:2	1	H.PGHPGYIN[+0.984]F.S		N[+1]	501.737	2	1002.47	1002.47	0	-1.9	23	Non	457.74	385.74	385.74	5.31	1125	>sp|P02817|AMELX_BOVIN Amelogenin, X isoform OS=Bos taurus OX=9913 GN=AMELX PE=1 SV=2	1	hf1_eb_18273_82_20032023.ScanId;v=1;d1=16176.16176.2	controllerType=0 controllerNumber=1 scan=16176	40.521
16869:2	1	H.PGHPGYIN[+0.984]F.S		N[+1]	501.737	2	1002.47	1002.47	0	-1.9	23	Non	470.52	398.59	398.59	5.31	1125	>sp|P02817|AMELX_BOVIN Amelogenin, X isoform OS=Bos taurus OX=9913 GN=AMELX PE=1 SV=2	1	hf1_eb_18273_82_20032023.ScanId;v=1;d1=15339.15339.2	controllerType=0 controllerNumber=1 scan=15339	39.0224
18891:2	1	H.PGHPGYIN[+0.984]F.S		N[+1]	501.738	2	1002.47	1002.47	0	0	23	Non	494.29	422.52	422.52	5.67	1125	>sp|P02817|AMELX_BOVIN Amelogenin, X isoform OS=Bos taurus OX=9913 GN=AMELX PE=1 SV=2	1	hf1_eb_18273_82_20032023.ScanId;v=1;d1=16846.16846.2	controllerType=0 controllerNumber=1 scan=16846	41.7161
17301:2	1	H.PGHP[+15.995]GYIN[+0.984]F.S		N[+1], P[+16]	509.734	2	1018.46	1018.46	0	-2.2	23	Non	404.53	364.01	38.78	5.28	1125	>sp|P02817|AMELX_BOVIN Amelogenin, X isoform OS=Bos taurus OX=9913 GN=AMELX PE=1 SV=2	1	hf1_eb_18273_82_20032023.ScanId;v=1;d1=15663.15663.2	controllerType=0 controllerNumber=1 scan=15663	39.6049
16457:2	1	H.PGHPGYIN[+0.984]FS.Y		N[+1]	545.253	2	1089.5	1089.5	0	-0.6	23	Non	254.56	236.64	236.64	3.99	1125	>sp|P02817|AMELX_BOVIN Amelogenin, X isoform OS=Bos taurus OX=9913 GN=AMELX PE=1 SV=2	1	hf1_eb_18273_82_20032023.ScanId;v=1;d1=15046.15046.3	controllerType=0 controllerNumber=1 scan=15046	38.5169
20040:2	1	H.PGHPGYIN[+0.984]FS[+79.966].Y		N[+1], S[+80]	585.236	2	1169.46	1169.47	0	-2.2	23	Non	392.07	270.91	270.91	4.73	1125	>sp|P02817|AMELX_BOVIN Amelogenin, X isoform OS=Bos taurus OX=9913 GN=AMELX PE=1 SV=2	1	hf1_eb_18273_82_20032023.ScanId;v=1;d1=17691.17691.2	controllerType=0 controllerNumber=1 scan=17691	43.2591
19781:2	1	H.PGHPGYIN[+0.984]FS[+79.966].Y		N[+1], S[+80]	585.236	2	1169.46	1169.47	0	-1.2	23	Non	512.64	387.17	387.17	6.44	1125	>sp|P02817|AMELX_BOVIN Amelogenin, X isoform OS=Bos taurus OX=9913 GN=AMELX PE=1 SV=2	1	hf1_eb_18273_82_20032023.ScanId;v=1;d1=17498.17498.2	controllerType=0 controllerNumber=1 scan=17498	42.9073
25236:2	1	H.PGHPGYIN[+0.984]FS[+79.966]Y.E		N[+1], S[+80]	666.768	2	1332.53	1332.53	0	-1.3	23	Non	264.59	207.84	207.84	3.99	1125	>sp|P02817|AMELX_BOVIN Amelogenin, X isoform OS=Bos taurus OX=9913 GN=AMELX PE=1 SV=2	1	hf1_eb_18273_82_20032023.ScanId;v=1;d1=21464.21464.2	controllerType=0 controllerNumber=1 scan=21464	50.1453
23725:2	1	H.PGHPGYIN[+0.984]FS[+79.966]YE.V		N[+1], S[+80]	731.288	2	1461.57	1461.57	0	-2.2	23	Non	84.53	84.53	84.53	1.18	1125	>sp|P02817|AMELX_BOVIN Amelogenin, X isoform OS=Bos taurus OX=9913 GN=AMELX PE=1 SV=2	1	hf1_eb_18273_82_20032023.ScanId;v=1;d1=20386.20386.2	controllerType=0 controllerNumber=1 scan=20386	48.1904
23661:2	1	H.PGHPGYIN[+0.984]FS[+79.966]YE.V		N[+1], S[+80]	731.289	2	1461.57	1461.57	0	-0.5	23	Non	122.15	122.15	122.15	1.83	1125	>sp|P02817|AMELX_BOVIN Amelogenin, X isoform OS=Bos taurus OX=9913 GN=AMELX PE=1 SV=2	1	hf1_eb_18273_82_20032023.ScanId;v=1;d1=20338.20338.2	controllerType=0 controllerNumber=1 scan=20338	48.1034
32797:2	1	H.PGHPGYIN[+0.984]FS[+79.966]YEVL.T		N[+1], S[+80]	837.367	2	1673.73	1673.72	0	1.3	23	Non	108.67	108.67	108.67	1.05	1125	>sp|P02817|AMELX_BOVIN Amelogenin, X isoform OS=Bos taurus OX=9913 GN=AMELX PE=1 SV=2	1	hf1_eb_18273_82_20032023.ScanId;v=1;d1=26762.26762.2	controllerType=0 controllerNumber=1 scan=26762	59.7671
32596:2	1	H.PGHPGYIN[+0.984]FS[+79.966]YEVLTP.L		N[+1], S[+80]	936.417	2	1871.83	1871.83	0	0.5	23	Non	76.72	76.72	76.72	1.54	1125	>sp|P02817|AMELX_BOVIN Amelogenin, X isoform OS=Bos taurus OX=9913 GN=AMELX PE=1 SV=2	1	hf1_eb_18273_82_20032023.ScanId;v=1;d1=26626.26626.2	controllerType=0 controllerNumber=1 scan=26626	59.508
34419:2	1	H.PGHPGYIN[+0.984]FSYEVLTPL.K		N[+1]	952.976	2	1904.94	1904.94	0	0.8	23	Non	125.28	125.28	125.28	2.22	1125	>sp|P02817|AMELX_BOVIN Amelogenin, X isoform OS=Bos taurus OX=9913 GN=AMELX PE=1 SV=2	1	hf1_eb_18273_82_20032023.ScanId;v=1;d1=27887.27887.2	controllerType=0 controllerNumber=1 scan=27887	61.885
35862:2	1	H.PGHPGYINFS[+79.966]YEVLTPL.K		S[+80]	992.466	2	1983.93	1983.93	0	0.1	23	Non	234.09	234.09	167.94	3.35	1125	>sp|P02817|AMELX_BOVIN Amelogenin, X isoform OS=Bos taurus OX=9913 GN=AMELX PE=1 SV=2	1	hf1_eb_18273_82_20032023.ScanId;v=1;d1=28883.28883.2	controllerType=0 controllerNumber=1 scan=28883	63.7507
30875:2	1	H.PGHPGYINFS[+79.966]YEVLTPLK.W		S[+80]	1056.52	2	2112.03	2112.02	0	2.9	23	NRagged	169.99	169.99	119.13	2.64	1125	>sp|P02817|AMELX_BOVIN Amelogenin, X isoform OS=Bos taurus OX=9913 GN=AMELX PE=1 SV=2	1	hf1_eb_18273_82_20032023.ScanId;v=1;d1=25417.25417.2	controllerType=0 controllerNumber=1 scan=25417	57.2907
30709:3	1	H.PGHPGYINFS[+79.966]YEVLTPLK.W		S[+80]	704.677	3	2112.02	2112.02	0	-2.3	23	NRagged	667.61	667.61	416.97	9.79	1125	>sp|P02817|AMELX_BOVIN Amelogenin, X isoform OS=Bos taurus OX=9913 GN=AMELX PE=1 SV=2	1	hf1_eb_18273_82_20032023.ScanId;v=1;d1=25307.25307.3	controllerType=0 controllerNumber=1 scan=25307	57.0973
18733:3	1	H.PGHPGYINF[+15.995]SY[+31.990]EVLTPLK.W		F[+16], Y[+32]	694.016	3	2080.03	2080.04	0	-2.3	23	NRagged	28.53	28.53	0	0.59	1125	>sp|P02817|AMELX_BOVIN Amelogenin, X isoform OS=Bos taurus OX=9913 GN=AMELX PE=1 SV=2	1	hf1_eb_18273_82_20032023.ScanId;v=1;d1=16739.16739.3	controllerType=0 controllerNumber=1 scan=16739	41.5303
30679:2	1	H.PGHPGYIN[+0.984]FS[+79.966]YEVLTPLK.W		N[+1], S[+80]	1057.01	2	2113.01	2113	0	1.8	23	NRagged	381	381	262.55	7.39	1125	>sp|P02817|AMELX_BOVIN Amelogenin, X isoform OS=Bos taurus OX=9913 GN=AMELX PE=1 SV=2	1	hf1_eb_18273_82_20032023.ScanId;v=1;d1=25286.25286.2	controllerType=0 controllerNumber=1 scan=25286	57.0601
31676:2	1	H.PGHPGYIN[+0.984]FS[+79.966]YEVLTPLK.W		N[+1], S[+80]	1057.01	2	2113.01	2113	0	3.4	23	NRagged	412.95	354.35	278.02	5.79	1125	>sp|P02817|AMELX_BOVIN Amelogenin, X isoform OS=Bos taurus OX=9913 GN=AMELX PE=1 SV=2	1	hf1_eb_18273_82_20032023.ScanId;v=1;d1=25979.25979.2	controllerType=0 controllerNumber=1 scan=25979	58.3165
31659:3	1	H.PGHPGYIN[+0.984]FS[+79.966]YEVLTPLK.W		N[+1], S[+80]	705.006	3	2113	2113	0	-0.8	23	NRagged	480.63	480.63	299.97	7.59	1125	>sp|P02817|AMELX_BOVIN Amelogenin, X isoform OS=Bos taurus OX=9913 GN=AMELX PE=1 SV=2	1	hf1_eb_18273_82_20032023.ScanId;v=1;d1=25967.25967.3	controllerType=0 controllerNumber=1 scan=25967	58.2929
31127:3	1	H.PGHP[+15.995]GYIN[+0.984]FS[+79.966]YEVLTPLK.W		N[+1], P[+16], S[+80]	710.337	3	2129	2129	0	-0.6	23	NRagged	145.48	145.48	0	3.06	1125	>sp|P02817|AMELX_BOVIN Amelogenin, X isoform OS=Bos taurus OX=9913 GN=AMELX PE=1 SV=2	1	hf1_eb_18273_82_20032023.ScanId;v=1;d1=25587.25587.3	controllerType=0 controllerNumber=1 scan=25587	57.5919
05713:2	1	P.GHPGYIN[+0.984].F		N[+1]	379.676	2	758.345	758.347	0	-2.3	24	Non	330.83	330.83	330.83	3.89	1125	>sp|P02817|AMELX_BOVIN Amelogenin, X isoform OS=Bos taurus OX=9913 GN=AMELX PE=1 SV=2	1	hf1_eb_18273_82_20032023.ScanId;v=1;d1=6829.6829.2	controllerType=0 controllerNumber=1 scan=6829	22.7333
05334:2	1	P.GHPGYIN[+0.984].F		N[+1]	379.677	2	758.347	758.347	0	-0.2	24	Non	330.91	330.91	330.91	4.67	1125	>sp|P02817|AMELX_BOVIN Amelogenin, X isoform OS=Bos taurus OX=9913 GN=AMELX PE=1 SV=2	1	hf1_eb_18273_82_20032023.ScanId;v=1;d1=6503.6503.2	controllerType=0 controllerNumber=1 scan=6503	22.052
05531:2	1	P.GHPGYIN[+0.984].F		N[+1]	379.677	2	758.346	758.347	0	-1.2	24	Non	337.54	337.54	337.54	4.24	1125	>sp|P02817|AMELX_BOVIN Amelogenin, X isoform OS=Bos taurus OX=9913 GN=AMELX PE=1 SV=2	1	hf1_eb_18273_82_20032023.ScanId;v=1;d1=6669.6669.2	controllerType=0 controllerNumber=1 scan=6669	22.3966
04139:1	1	P.GHP[+15.995]GYIN[+0.984].F		N[+1], P[+16]	774.34	1	774.34	774.342	0	-2.2	24	Non	115.15	115.15	35.3	1.35	1125	>sp|P02817|AMELX_BOVIN Amelogenin, X isoform OS=Bos taurus OX=9913 GN=AMELX PE=1 SV=2	1	hf1_eb_18273_82_20032023.ScanId;v=1;d1=5507.5507.3	controllerType=0 controllerNumber=1 scan=5507	19.9397
14263:2	1	P.GHPGYINF.S			452.719	2	904.43	904.431	0	-1.3	24	Non	254.49	254.49	254.49	3.45	1125	>sp|P02817|AMELX_BOVIN Amelogenin, X isoform OS=Bos taurus OX=9913 GN=AMELX PE=1 SV=2	1	hf1_eb_18273_82_20032023.ScanId;v=1;d1=13452.13452.2	controllerType=0 controllerNumber=1 scan=13452	35.5909
15872:2	1	P.GHPGYINF.S			452.719	2	904.431	904.431	0	-0.7	24	Non	263.97	263.97	263.97	3.91	1125	>sp|P02817|AMELX_BOVIN Amelogenin, X isoform OS=Bos taurus OX=9913 GN=AMELX PE=1 SV=2	1	hf1_eb_18273_82_20032023.ScanId;v=1;d1=14638.14638.2	controllerType=0 controllerNumber=1 scan=14638	37.8217
17386:2	1	P.GHPGYINF.S			452.719	2	904.43	904.431	0	-1.7	24	Non	313.59	313.59	313.59	4.19	1125	>sp|P02817|AMELX_BOVIN Amelogenin, X isoform OS=Bos taurus OX=9913 GN=AMELX PE=1 SV=2	1	hf1_eb_18273_82_20032023.ScanId;v=1;d1=15728.15728.2	controllerType=0 controllerNumber=1 scan=15728	39.7189
17138:2	1	P.GHPGYINF.S			452.718	2	904.429	904.431	0	-2.3	24	Non	401.21	395.14	395.14	5.16	1125	>sp|P02817|AMELX_BOVIN Amelogenin, X isoform OS=Bos taurus OX=9913 GN=AMELX PE=1 SV=2	1	hf1_eb_18273_82_20032023.ScanId;v=1;d1=15538.15538.2	controllerType=0 controllerNumber=1 scan=15538	39.3673
19115:2	1	P.GHPGYIN[+0.984]F.S		N[+1]	453.211	2	905.415	905.415	0	-0.3	24	Non	236.96	233.56	233.56	2.32	1125	>sp|P02817|AMELX_BOVIN Amelogenin, X isoform OS=Bos taurus OX=9913 GN=AMELX PE=1 SV=2	1	hf1_eb_18273_82_20032023.ScanId;v=1;d1=17002.17002.2	controllerType=0 controllerNumber=1 scan=17002	41.9948
19385:2	1	P.GHPGYIN[+0.984]F.S		N[+1]	453.21	2	905.413	905.415	0	-2.7	24	Non	275.76	267.62	267.62	3.57	1125	>sp|P02817|AMELX_BOVIN Amelogenin, X isoform OS=Bos taurus OX=9913 GN=AMELX PE=1 SV=2	1	hf1_eb_18273_82_20032023.ScanId;v=1;d1=17203.17203.2	controllerType=0 controllerNumber=1 scan=17203	42.3597
18589:2	1	P.GHPGYIN[+0.984]F.S		N[+1]	453.211	2	905.414	905.415	0	-1.1	24	Non	276.7	261.83	261.83	3.91	1125	>sp|P02817|AMELX_BOVIN Amelogenin, X isoform OS=Bos taurus OX=9913 GN=AMELX PE=1 SV=2	1	hf1_eb_18273_82_20032023.ScanId;v=1;d1=16635.16635.2	controllerType=0 controllerNumber=1 scan=16635	41.3471
16276:2	1	P.GHP[+15.995]GYINF.S		P[+16]	460.716	2	920.425	920.426	0	-1.3	24	Non	284.73	284.73	22.2	3.72	1125	>sp|P02817|AMELX_BOVIN Amelogenin, X isoform OS=Bos taurus OX=9913 GN=AMELX PE=1 SV=2	1	hf1_eb_18273_82_20032023.ScanId;v=1;d1=14915.14915.2	controllerType=0 controllerNumber=1 scan=14915	38.2928
20701:2	1	P.GHPGYIN[+0.984]F.S		N[+1]	453.212	2	905.416	905.415	0	0.8	24	Non	294.17	287.48	287.48	4.17	1125	>sp|P02817|AMELX_BOVIN Amelogenin, X isoform OS=Bos taurus OX=9913 GN=AMELX PE=1 SV=2	1	hf1_eb_18273_82_20032023.ScanId;v=1;d1=18210.18210.2	controllerType=0 controllerNumber=1 scan=18210	44.239
18351:2	1	P.GHPGYIN[+0.984]F.S		N[+1]	453.21	2	905.413	905.415	0	-1.9	24	Non	327.39	323.99	323.99	4.47	1125	>sp|P02817|AMELX_BOVIN Amelogenin, X isoform OS=Bos taurus OX=9913 GN=AMELX PE=1 SV=2	1	hf1_eb_18273_82_20032023.ScanId;v=1;d1=16449.16449.2	controllerType=0 controllerNumber=1 scan=16449	41.0083
17697:2	1	P.GHPGYIN[+0.984]F.S		N[+1]	453.21	2	905.413	905.415	0	-1.9	24	Non	338.05	331.68	331.68	4.47	1125	>sp|P02817|AMELX_BOVIN Amelogenin, X isoform OS=Bos taurus OX=9913 GN=AMELX PE=1 SV=2	1	hf1_eb_18273_82_20032023.ScanId;v=1;d1=15961.15961.2	controllerType=0 controllerNumber=1 scan=15961	40.1313
18093:2	1	P.GHPGYIN[+0.984]F.S		N[+1]	453.21	2	905.414	905.415	0	-1.7	24	Non	386.38	384.61	384.61	5.65	1125	>sp|P02817|AMELX_BOVIN Amelogenin, X isoform OS=Bos taurus OX=9913 GN=AMELX PE=1 SV=2	1	hf1_eb_18273_82_20032023.ScanId;v=1;d1=16258.16258.2	controllerType=0 controllerNumber=1 scan=16258	40.666
16455:2	1	P.GHPGYIN[+0.984]F.S		N[+1]	453.211	2	905.414	905.415	0	-1	24	Non	402.34	372.81	372.81	5.51	1125	>sp|P02817|AMELX_BOVIN Amelogenin, X isoform OS=Bos taurus OX=9913 GN=AMELX PE=1 SV=2	1	hf1_eb_18273_82_20032023.ScanId;v=1;d1=15044.15044.2	controllerType=0 controllerNumber=1 scan=15044	38.5145
18223:1	1	P.GHPGYIN[+0.984]F.S		N[+1]	905.414	1	905.414	905.415	0	-1.2	24	Non	440.46	395.74	395.74	5.58	1125	>sp|P02817|AMELX_BOVIN Amelogenin, X isoform OS=Bos taurus OX=9913 GN=AMELX PE=1 SV=2	1	hf1_eb_18273_82_20032023.ScanId;v=1;d1=16351.16351.3	controllerType=0 controllerNumber=1 scan=16351	40.8316
16472:2	1	P.GHPGY[+15.995]IN[+0.984]F.S		N[+1], Y[+16]	461.209	2	921.411	921.41	0	1.2	24	Non	140.31	140.31	8.68	0.43	1125	>sp|P02817|AMELX_BOVIN Amelogenin, X isoform OS=Bos taurus OX=9913 GN=AMELX PE=1 SV=2	1	hf1_eb_18273_82_20032023.ScanId;v=1;d1=15057.15057.2	controllerType=0 controllerNumber=1 scan=15057	38.5386
15411:2	1	P.GHP[+15.995]GYIN[+0.984]F.S		N[+1], P[+16]	461.208	2	921.409	921.41	0	-1.4	24	Non	263.7	246.67	31.69	3.45	1125	>sp|P02817|AMELX_BOVIN Amelogenin, X isoform OS=Bos taurus OX=9913 GN=AMELX PE=1 SV=2	1	hf1_eb_18273_82_20032023.ScanId;v=1;d1=14312.14312.2	controllerType=0 controllerNumber=1 scan=14312	37.2264
15428:2	1	P.GHP[+15.995]GYIN[+0.984]F.S		N[+1], P[+16]	461.208	2	921.409	921.41	0	-1.3	24	Non	281.67	281.67	30.1	4.19	1125	>sp|P02817|AMELX_BOVIN Amelogenin, X isoform OS=Bos taurus OX=9913 GN=AMELX PE=1 SV=2	1	hf1_eb_18273_82_20032023.ScanId;v=1;d1=14325.14325.2	controllerType=0 controllerNumber=1 scan=14325	37.2491
17131:2	1	P.GHP[+15.995]GYIN[+0.984]F.S		N[+1], P[+16]	461.208	2	921.408	921.41	0	-1.9	24	Non	287.29	287.29	32.23	4.19	1125	>sp|P02817|AMELX_BOVIN Amelogenin, X isoform OS=Bos taurus OX=9913 GN=AMELX PE=1 SV=2	1	hf1_eb_18273_82_20032023.ScanId;v=1;d1=15534.15534.2	controllerType=0 controllerNumber=1 scan=15534	39.3621
14967:2	1	P.GHPGYIN[+0.984]FS.Y		N[+1]	496.726	2	992.446	992.447	0	-1.6	24	Non	153.03	93.27	93.27	0.7	1125	>sp|P02817|AMELX_BOVIN Amelogenin, X isoform OS=Bos taurus OX=9913 GN=AMELX PE=1 SV=2	1	hf1_eb_18273_82_20032023.ScanId;v=1;d1=13979.13979.2	controllerType=0 controllerNumber=1 scan=13979	36.6056
16877:2	1	P.GHPGYIN[+0.984]FS.Y		N[+1]	496.727	2	992.446	992.447	0	-1.4	24	Non	292.88	239.58	239.58	3.9	1125	>sp|P02817|AMELX_BOVIN Amelogenin, X isoform OS=Bos taurus OX=9913 GN=AMELX PE=1 SV=2	1	hf1_eb_18273_82_20032023.ScanId;v=1;d1=15344.15344.2	controllerType=0 controllerNumber=1 scan=15344	39.0284
18033:2	1	P.GHPGYINFS[+79.966].Y		S[+80]	536.217	2	1071.43	1071.43	0	-1.9	24	Non	310.22	310.22	310.22	3.84	1125	>sp|P02817|AMELX_BOVIN Amelogenin, X isoform OS=Bos taurus OX=9913 GN=AMELX PE=1 SV=2	1	hf1_eb_18273_82_20032023.ScanId;v=1;d1=16213.16213.2	controllerType=0 controllerNumber=1 scan=16213	40.5888
15937:2	1	P.GHPGYIN[+0.984]FS.Y		N[+1]	496.727	2	992.447	992.447	0	-0.6	24	Non	353.05	261.8	261.8	4.03	1125	>sp|P02817|AMELX_BOVIN Amelogenin, X isoform OS=Bos taurus OX=9913 GN=AMELX PE=1 SV=2	1	hf1_eb_18273_82_20032023.ScanId;v=1;d1=14682.14682.2	controllerType=0 controllerNumber=1 scan=14682	37.8952
19649:2	1	P.GHPGYIN[+0.984]FS[+79.966].Y		N[+1], S[+80]	536.71	2	1072.41	1072.41	0	-1.6	24	Non	401.16	307.43	307.43	4.94	1125	>sp|P02817|AMELX_BOVIN Amelogenin, X isoform OS=Bos taurus OX=9913 GN=AMELX PE=1 SV=2	1	hf1_eb_18273_82_20032023.ScanId;v=1;d1=17406.17406.2	controllerType=0 controllerNumber=1 scan=17406	42.7416
23984:2	1	P.GHPGYINFS[+79.966]Y.E		S[+80]	617.75	2	1234.49	1234.49	0	-0.9	24	Non	125.75	111.3	111.3	1.45	1125	>sp|P02817|AMELX_BOVIN Amelogenin, X isoform OS=Bos taurus OX=9913 GN=AMELX PE=1 SV=2	1	hf1_eb_18273_82_20032023.ScanId;v=1;d1=20559.20559.2	controllerType=0 controllerNumber=1 scan=20559	48.4996
20623:2	1	P.GHPGYIN[+0.984]FSY.E		N[+1]	578.258	2	1155.51	1155.51	0	-2.3	24	Non	249.27	249.27	249.27	3.35	1125	>sp|P02817|AMELX_BOVIN Amelogenin, X isoform OS=Bos taurus OX=9913 GN=AMELX PE=1 SV=2	1	hf1_eb_18273_82_20032023.ScanId;v=1;d1=18151.18151.2	controllerType=0 controllerNumber=1 scan=18151	44.129
21480:2	1	P.GHPGYIN[+0.984]FSY.E		N[+1]	578.259	2	1155.51	1155.51	0	0.7	24	Non	305.74	244.25	244.25	4.85	1125	>sp|P02817|AMELX_BOVIN Amelogenin, X isoform OS=Bos taurus OX=9913 GN=AMELX PE=1 SV=2	1	hf1_eb_18273_82_20032023.ScanId;v=1;d1=18767.18767.2	controllerType=0 controllerNumber=1 scan=18767	45.2511
22556:2	1	P.GHPGYINFS[+79.966]YE.V		S[+80]	682.269	2	1363.53	1363.54	0	-3.2	24	Non	202.95	202.95	183.68	2.56	1125	>sp|P02817|AMELX_BOVIN Amelogenin, X isoform OS=Bos taurus OX=9913 GN=AMELX PE=1 SV=2	1	hf1_eb_18273_82_20032023.ScanId;v=1;d1=19556.19556.2	controllerType=0 controllerNumber=1 scan=19556	46.6556
23880:2	1	P.GHPGYIN[+0.984]FS[+79.966]YE.V		N[+1], S[+80]	682.763	2	1364.52	1364.52	0	-0.2	24	Non	102.39	95.92	95.92	0.92	1125	>sp|P02817|AMELX_BOVIN Amelogenin, X isoform OS=Bos taurus OX=9913 GN=AMELX PE=1 SV=2	1	hf1_eb_18273_82_20032023.ScanId;v=1;d1=20491.20491.2	controllerType=0 controllerNumber=1 scan=20491	48.3792
23604:2	1	P.GHPGYIN[+0.984]FS[+79.966]YE.V		N[+1], S[+80]	682.763	2	1364.52	1364.52	0	-0.2	24	Non	196.3	179.42	179.42	2.31	1125	>sp|P02817|AMELX_BOVIN Amelogenin, X isoform OS=Bos taurus OX=9913 GN=AMELX PE=1 SV=2	1	hf1_eb_18273_82_20032023.ScanId;v=1;d1=20297.20297.2	controllerType=0 controllerNumber=1 scan=20297	48.0312
29453:2	1	P.GHPGYIN[+0.984]FSYEVL.T		N[+1]	748.856	2	1496.7	1496.71	0	-1	24	Non	242.4	214.28	214.28	4.72	1125	>sp|P02817|AMELX_BOVIN Amelogenin, X isoform OS=Bos taurus OX=9913 GN=AMELX PE=1 SV=2	1	hf1_eb_18273_82_20032023.ScanId;v=1;d1=24397.24397.2	controllerType=0 controllerNumber=1 scan=24397	55.4434
29893:2	1	P.GHPGYIN[+0.984]FSYEVL.T		N[+1]	748.856	2	1496.7	1496.71	0	-0.4	24	Non	248.85	235.75	235.75	4.16	1125	>sp|P02817|AMELX_BOVIN Amelogenin, X isoform OS=Bos taurus OX=9913 GN=AMELX PE=1 SV=2	1	hf1_eb_18273_82_20032023.ScanId;v=1;d1=24706.24706.2	controllerType=0 controllerNumber=1 scan=24706	55.9989
31798:2	1	P.GHPGYINFS[+79.966]YEVL.T		S[+80]	788.348	2	1575.69	1575.69	0	0	24	Non	289.6	289.6	260.84	5.16	1125	>sp|P02817|AMELX_BOVIN Amelogenin, X isoform OS=Bos taurus OX=9913 GN=AMELX PE=1 SV=2	1	hf1_eb_18273_82_20032023.ScanId;v=1;d1=26064.26064.2	controllerType=0 controllerNumber=1 scan=26064	58.4671
31698:2	1	P.GHPGYIN[+0.984]FS[+79.966]YEVL.T		N[+1], S[+80]	788.84	2	1576.67	1576.67	0	0.4	24	Non	110.58	110.58	110.58	1.7	1125	>sp|P02817|AMELX_BOVIN Amelogenin, X isoform OS=Bos taurus OX=9913 GN=AMELX PE=1 SV=2	1	hf1_eb_18273_82_20032023.ScanId;v=1;d1=25995.25995.2	controllerType=0 controllerNumber=1 scan=25995	58.3434
32805:2	1	P.GHPGYIN[+0.984]FS[+79.966]YEVL.T		N[+1], S[+80]	788.84	2	1576.67	1576.67	0	0.2	24	Non	138.02	138.02	138.02	2.12	1125	>sp|P02817|AMELX_BOVIN Amelogenin, X isoform OS=Bos taurus OX=9913 GN=AMELX PE=1 SV=2	1	hf1_eb_18273_82_20032023.ScanId;v=1;d1=26769.26769.2	controllerType=0 controllerNumber=1 scan=26769	59.7836
30922:2	1	P.GHPGYIN[+0.984]FS[+79.966]YEVLT.P		N[+1], S[+80]	839.363	2	1677.72	1677.72	0	-0.1	24	Non	50.26	50.26	50.26	0.79	1125	>sp|P02817|AMELX_BOVIN Amelogenin, X isoform OS=Bos taurus OX=9913 GN=AMELX PE=1 SV=2	1	hf1_eb_18273_82_20032023.ScanId;v=1;d1=25448.25448.2	controllerType=0 controllerNumber=1 scan=25448	57.3459
31662:2	1	P.GHPGYINFS[+79.966]YEVLTP.L		S[+80]	887.398	2	1773.79	1773.79	0	0.6	24	Non	119.15	102.26	78.74	1.2	1125	>sp|P02817|AMELX_BOVIN Amelogenin, X isoform OS=Bos taurus OX=9913 GN=AMELX PE=1 SV=2	1	hf1_eb_18273_82_20032023.ScanId;v=1;d1=25968.25968.2	controllerType=0 controllerNumber=1 scan=25968	58.2944
31581:2	1	P.GHPGYIN[+0.984]FS[+79.966]YEVLTP.L		N[+1], S[+80]	887.89	2	1774.77	1774.77	0	0.1	24	Non	102.02	102.02	102.02	1.2	1125	>sp|P02817|AMELX_BOVIN Amelogenin, X isoform OS=Bos taurus OX=9913 GN=AMELX PE=1 SV=2	1	hf1_eb_18273_82_20032023.ScanId;v=1;d1=25908.25908.2	controllerType=0 controllerNumber=1 scan=25908	58.1825
34859:2	1	P.GHPGYIN[+0.984]FSYEVLTPL.K		N[+1]	904.449	2	1807.89	1807.89	0	0.3	24	Non	102.61	102.61	102.61	2.13	1125	>sp|P02817|AMELX_BOVIN Amelogenin, X isoform OS=Bos taurus OX=9913 GN=AMELX PE=1 SV=2	1	hf1_eb_18273_82_20032023.ScanId;v=1;d1=28188.28188.2	controllerType=0 controllerNumber=1 scan=28188	62.4437
34280:2	1	P.GHPGYIN[+0.984]FSYEVLTPL.K		N[+1]	904.449	2	1807.89	1807.89	0	0.6	24	Non	362.83	362.83	362.83	6.83	1125	>sp|P02817|AMELX_BOVIN Amelogenin, X isoform OS=Bos taurus OX=9913 GN=AMELX PE=1 SV=2	1	hf1_eb_18273_82_20032023.ScanId;v=1;d1=27795.27795.2	controllerType=0 controllerNumber=1 scan=27795	61.7202
35831:2	1	P.GHPGYIN[+0.984]FS[+79.966]YEVLTPL.K		N[+1], S[+80]	944.433	2	1887.86	1887.86	0	1	24	Non	273.85	273.85	138.73	5.11	1125	>sp|P02817|AMELX_BOVIN Amelogenin, X isoform OS=Bos taurus OX=9913 GN=AMELX PE=1 SV=2	1	hf1_eb_18273_82_20032023.ScanId;v=1;d1=28864.28864.2	controllerType=0 controllerNumber=1 scan=28864	63.7171
31940:3	1	P.GHPGYINFS[+79.966]YEVLTPLK.W		S[+80]	672.321	3	2014.95	2014.97	0	-9.7	24	NRagged	237.62	237.62	237.62	3.17	1125	>sp|P02817|AMELX_BOVIN Amelogenin, X isoform OS=Bos taurus OX=9913 GN=AMELX PE=1 SV=2	1	hf1_eb_18273_82_20032023.ScanId;v=1;d1=26164.26164.3	controllerType=0 controllerNumber=1 scan=26164	58.6515
30939:2	1	P.GHPGYINFS[+79.966]YEVLTPLK.W		S[+80]	1007.98	2	2014.96	2014.97	0	-4.3	24	NRagged	301.82	301.82	221.76	5.95	1125	>sp|P02817|AMELX_BOVIN Amelogenin, X isoform OS=Bos taurus OX=9913 GN=AMELX PE=1 SV=2	1	hf1_eb_18273_82_20032023.ScanId;v=1;d1=25458.25458.2	controllerType=0 controllerNumber=1 scan=25458	57.3638
29632:3	1	P.GHPGYIN[+0.984]FSYEVLTPLK.W		N[+1]	645.998	3	1935.98	1935.99	0	-2.9	24	NRagged	330.89	330.89	330.89	5.98	1125	>sp|P02817|AMELX_BOVIN Amelogenin, X isoform OS=Bos taurus OX=9913 GN=AMELX PE=1 SV=2	1	hf1_eb_18273_82_20032023.ScanId;v=1;d1=24523.24523.3	controllerType=0 controllerNumber=1 scan=24523	55.6714
28677:3	1	P.GHPGYIN[+0.984]FSYEVLTPLK.W		N[+1]	645.999	3	1935.98	1935.99	0	-0.7	24	NRagged	525.38	525.38	525.38	7.68	1125	>sp|P02817|AMELX_BOVIN Amelogenin, X isoform OS=Bos taurus OX=9913 GN=AMELX PE=1 SV=2	1	hf1_eb_18273_82_20032023.ScanId;v=1;d1=23854.23854.3	controllerType=0 controllerNumber=1 scan=23854	54.4595
31922:2	1	P.GHPGYIN[+0.984]FS[+79.966]YEVLTPLK.W		N[+1], S[+80]	1008.48	2	2015.95	2015.95	0	0.5	24	NRagged	98.6	98.6	78.45	3.85	1125	>sp|P02817|AMELX_BOVIN Amelogenin, X isoform OS=Bos taurus OX=9913 GN=AMELX PE=1 SV=2	1	hf1_eb_18273_82_20032023.ScanId;v=1;d1=26150.26150.2	controllerType=0 controllerNumber=1 scan=26150	58.6248
31109:3	1	P.GHP[+15.995]GYINFS[+79.966]YEVLTPLK.W		P[+16], S[+80]	677.653	3	2030.94	2030.96	0	-8.6	24	NRagged	179.81	179.81	0	2.48	1125	>sp|P02817|AMELX_BOVIN Amelogenin, X isoform OS=Bos taurus OX=9913 GN=AMELX PE=1 SV=2	1	hf1_eb_18273_82_20032023.ScanId;v=1;d1=25576.25576.3	controllerType=0 controllerNumber=1 scan=25576	57.5725
31404:3	1	P.GHPGYIN[+0.984]FS[+79.966]YEVLTPLK.W		N[+1], S[+80]	672.655	3	2015.95	2015.95	0	-0.9	24	NRagged	386.3	386.3	207.13	7.16	1125	>sp|P02817|AMELX_BOVIN Amelogenin, X isoform OS=Bos taurus OX=9913 GN=AMELX PE=1 SV=2	1	hf1_eb_18273_82_20032023.ScanId;v=1;d1=25776.25776.3	controllerType=0 controllerNumber=1 scan=25776	57.9384
30625:3	1	P.GHPGYIN[+0.984]FS[+79.966]YEVLTPLK.W		N[+1], S[+80]	672.654	3	2015.95	2015.95	0	-1.9	24	NRagged	391.36	391.36	215.24	7.22	1125	>sp|P02817|AMELX_BOVIN Amelogenin, X isoform OS=Bos taurus OX=9913 GN=AMELX PE=1 SV=2	1	hf1_eb_18273_82_20032023.ScanId;v=1;d1=25250.25250.3	controllerType=0 controllerNumber=1 scan=25250	56.9977
31401:2	1	P.GHPGYIN[+0.984]FS[+79.966]YEVLTPLK.W		N[+1], S[+80]	1008.48	2	2015.95	2015.95	0	0.9	24	NRagged	399.03	399.03	194.09	8.04	1125	>sp|P02817|AMELX_BOVIN Amelogenin, X isoform OS=Bos taurus OX=9913 GN=AMELX PE=1 SV=2	1	hf1_eb_18273_82_20032023.ScanId;v=1;d1=25772.25772.2	controllerType=0 controllerNumber=1 scan=25772	57.93
30640:2	1	P.GHPGYIN[+0.984]FS[+79.966]YEVLTPLK.W		N[+1], S[+80]	1008.48	2	2015.95	2015.95	0	-0.4	24	NRagged	569.92	569.92	366.04	8.62	1125	>sp|P02817|AMELX_BOVIN Amelogenin, X isoform OS=Bos taurus OX=9913 GN=AMELX PE=1 SV=2	1	hf1_eb_18273_82_20032023.ScanId;v=1;d1=25261.25261.2	controllerType=0 controllerNumber=1 scan=25261	57.017
31657:3	1	P.GHPGYIN[+0.984]FS[+79.966]YEVLTPLK.W		N[+1], S[+80]	672.654	3	2015.95	2015.95	0	-1.4	24	NRagged	573.75	573.75	337.96	8.13	1125	>sp|P02817|AMELX_BOVIN Amelogenin, X isoform OS=Bos taurus OX=9913 GN=AMELX PE=1 SV=2	1	hf1_eb_18273_82_20032023.ScanId;v=1;d1=25965.25965.3	controllerType=0 controllerNumber=1 scan=25965	58.2898
31638:2	1	P.GHPGYIN[+0.984]FS[+79.966]YEVLTPLK.W		N[+1], S[+80]	1008.48	2	2015.95	2015.95	0	-0.7	24	NRagged	768.54	768.54	485.88	12.62	1125	>sp|P02817|AMELX_BOVIN Amelogenin, X isoform OS=Bos taurus OX=9913 GN=AMELX PE=1 SV=2	1	hf1_eb_18273_82_20032023.ScanId;v=1;d1=25953.25953.2	controllerType=0 controllerNumber=1 scan=25953	58.2697
31162:3	1	P.GHP[+15.995]GYIN[+0.984]FS[+79.966]YEVLTPLK.W		N[+1], P[+16], S[+80]	677.988	3	2031.95	2031.95	0	1.6	24	NRagged	100.66	100.66	0	2.49	1125	>sp|P02817|AMELX_BOVIN Amelogenin, X isoform OS=Bos taurus OX=9913 GN=AMELX PE=1 SV=2	1	hf1_eb_18273_82_20032023.ScanId;v=1;d1=25612.25612.3	controllerType=0 controllerNumber=1 scan=25612	57.6383
31131:2	1	P.GHP[+15.995]GYIN[+0.984]FS[+79.966]YEVLTPLK.W		N[+1], P[+16], S[+80]	1016.48	2	2031.95	2031.95	0	0.9	24	NRagged	322.31	322.31	0	6.79	1125	>sp|P02817|AMELX_BOVIN Amelogenin, X isoform OS=Bos taurus OX=9913 GN=AMELX PE=1 SV=2	1	hf1_eb_18273_82_20032023.ScanId;v=1;d1=25590.25590.2	controllerType=0 controllerNumber=1 scan=25590	57.5964
06510:1	1	G.HPGYI.N			586.298	1	586.298	586.298	0	-1.1	25	Non	184.91	163.24	163.24	1.34	1125	>sp|P02817|AMELX_BOVIN Amelogenin, X isoform OS=Bos taurus OX=9913 GN=AMELX PE=1 SV=2	1	hf1_eb_18273_82_20032023.ScanId;v=1;d1=7487.7487.2	controllerType=0 controllerNumber=1 scan=7487	24.094
05782:1	1	G.HPGYIN[+0.984].F		N[+1]	701.324	1	701.324	701.325	0	-1.7	25	Non	176.87	176.87	176.87	2.11	1125	>sp|P02817|AMELX_BOVIN Amelogenin, X isoform OS=Bos taurus OX=9913 GN=AMELX PE=1 SV=2	1	hf1_eb_18273_82_20032023.ScanId;v=1;d1=6890.6890.2	controllerType=0 controllerNumber=1 scan=6890	22.878
16069:2	1	G.HPGYINF.S			424.208	2	847.408	847.41	0	-1.7	25	Non	184.92	184.92	184.92	2.19	1125	>sp|P02817|AMELX_BOVIN Amelogenin, X isoform OS=Bos taurus OX=9913 GN=AMELX PE=1 SV=2	1	hf1_eb_18273_82_20032023.ScanId;v=1;d1=14770.14770.2	controllerType=0 controllerNumber=1 scan=14770	38.0424
17437:1	1	G.HPGYINF.S			847.409	1	847.409	847.41	0	-0.6	25	Non	331.95	282.78	282.78	4.15	1125	>sp|P02817|AMELX_BOVIN Amelogenin, X isoform OS=Bos taurus OX=9913 GN=AMELX PE=1 SV=2	1	hf1_eb_18273_82_20032023.ScanId;v=1;d1=15767.15767.2	controllerType=0 controllerNumber=1 scan=15767	39.7903
17348:2	1	G.HPGYINF.S			424.208	2	847.408	847.41	0	-1.6	25	Non	346.86	288.67	288.67	4.13	1125	>sp|P02817|AMELX_BOVIN Amelogenin, X isoform OS=Bos taurus OX=9913 GN=AMELX PE=1 SV=2	1	hf1_eb_18273_82_20032023.ScanId;v=1;d1=15698.15698.2	controllerType=0 controllerNumber=1 scan=15698	39.6696
17608:2	1	G.HPGYINF.S			424.208	2	847.408	847.41	0	-1.9	25	Non	350.87	340.62	340.62	3.89	1125	>sp|P02817|AMELX_BOVIN Amelogenin, X isoform OS=Bos taurus OX=9913 GN=AMELX PE=1 SV=2	1	hf1_eb_18273_82_20032023.ScanId;v=1;d1=15893.15893.2	controllerType=0 controllerNumber=1 scan=15893	40.009
17849:2	1	G.HPGYINF.S			424.208	2	847.408	847.41	0	-1.9	25	Non	355.09	324.01	324.01	4.24	1125	>sp|P02817|AMELX_BOVIN Amelogenin, X isoform OS=Bos taurus OX=9913 GN=AMELX PE=1 SV=2	1	hf1_eb_18273_82_20032023.ScanId;v=1;d1=16078.16078.2	controllerType=0 controllerNumber=1 scan=16078	40.349
18514:1	1	G.HPGYIN[+0.984]F.S		N[+1]	848.393	1	848.393	848.394	0	-1.4	25	Non	79	65.43	65.43	0.35	1125	>sp|P02817|AMELX_BOVIN Amelogenin, X isoform OS=Bos taurus OX=9913 GN=AMELX PE=1 SV=2	1	hf1_eb_18273_82_20032023.ScanId;v=1;d1=16580.16580.3	controllerType=0 controllerNumber=1 scan=16580	41.2482
18218:1	1	G.HPGYIN[+0.984]F.S		N[+1]	848.392	1	848.392	848.394	0	-2.2	25	Non	184.15	184.15	184.15	1.45	1125	>sp|P02817|AMELX_BOVIN Amelogenin, X isoform OS=Bos taurus OX=9913 GN=AMELX PE=1 SV=2	1	hf1_eb_18273_82_20032023.ScanId;v=1;d1=16348.16348.3	controllerType=0 controllerNumber=1 scan=16348	40.8277
20443:2	1	G.HPGYIN[+0.984]F.S		N[+1]	424.7	2	848.393	848.394	0	-0.7	25	Non	202.76	156.98	156.98	0.88	1125	>sp|P02817|AMELX_BOVIN Amelogenin, X isoform OS=Bos taurus OX=9913 GN=AMELX PE=1 SV=2	1	hf1_eb_18273_82_20032023.ScanId;v=1;d1=18020.18020.2	controllerType=0 controllerNumber=1 scan=18020	43.8775
19771:2	1	G.HPGYIN[+0.984]F.S		N[+1]	424.701	2	848.395	848.394	0	1.4	25	Non	220.81	207	207	2.3	1125	>sp|P02817|AMELX_BOVIN Amelogenin, X isoform OS=Bos taurus OX=9913 GN=AMELX PE=1 SV=2	1	hf1_eb_18273_82_20032023.ScanId;v=1;d1=17492.17492.2	controllerType=0 controllerNumber=1 scan=17492	42.8963
19674:2	1	G.HPGYIN[+0.984]F.S		N[+1]	424.7	2	848.392	848.394	0	-1.7	25	Non	227.81	227.81	227.81	2.31	1125	>sp|P02817|AMELX_BOVIN Amelogenin, X isoform OS=Bos taurus OX=9913 GN=AMELX PE=1 SV=2	1	hf1_eb_18273_82_20032023.ScanId;v=1;d1=17422.17422.2	controllerType=0 controllerNumber=1 scan=17422	42.7694
19556:2	1	G.HPGYIN[+0.984]F.S		N[+1]	424.7	2	848.393	848.394	0	-1.4	25	Non	237.28	198.71	198.71	2.19	1125	>sp|P02817|AMELX_BOVIN Amelogenin, X isoform OS=Bos taurus OX=9913 GN=AMELX PE=1 SV=2	1	hf1_eb_18273_82_20032023.ScanId;v=1;d1=17334.17334.2	controllerType=0 controllerNumber=1 scan=17334	42.6051
20715:2	1	G.HPGYIN[+0.984]F.S		N[+1]	424.7	2	848.394	848.394	0	0.1	25	Non	262.01	210.12	210.12	3.28	1125	>sp|P02817|AMELX_BOVIN Amelogenin, X isoform OS=Bos taurus OX=9913 GN=AMELX PE=1 SV=2	1	hf1_eb_18273_82_20032023.ScanId;v=1;d1=18224.18224.2	controllerType=0 controllerNumber=1 scan=18224	44.2675
15770:2	1	G.HPGYIN[+0.984]F.S		N[+1]	424.7	2	848.393	848.394	0	-1.2	25	Non	277.45	277.45	277.45	3.89	1125	>sp|P02817|AMELX_BOVIN Amelogenin, X isoform OS=Bos taurus OX=9913 GN=AMELX PE=1 SV=2	1	hf1_eb_18273_82_20032023.ScanId;v=1;d1=14570.14570.2	controllerType=0 controllerNumber=1 scan=14570	37.7011
19186:2	1	G.HPGYIN[+0.984]F.S		N[+1]	424.7	2	848.394	848.394	0	-0.2	25	Non	283.63	283.63	283.63	4.16	1125	>sp|P02817|AMELX_BOVIN Amelogenin, X isoform OS=Bos taurus OX=9913 GN=AMELX PE=1 SV=2	1	hf1_eb_18273_82_20032023.ScanId;v=1;d1=17048.17048.2	controllerType=0 controllerNumber=1 scan=17048	42.0753
18113:2	1	G.HPGYIN[+0.984]F.S		N[+1]	424.7	2	848.392	848.394	0	-2.3	25	Non	293.61	283.77	283.77	3.36	1125	>sp|P02817|AMELX_BOVIN Amelogenin, X isoform OS=Bos taurus OX=9913 GN=AMELX PE=1 SV=2	1	hf1_eb_18273_82_20032023.ScanId;v=1;d1=16273.16273.2	controllerType=0 controllerNumber=1 scan=16273	40.6926
18621:2	1	G.HPGYIN[+0.984]F.S		N[+1]	424.7	2	848.393	848.394	0	-0.6	25	Non	294.37	294.37	294.37	4.16	1125	>sp|P02817|AMELX_BOVIN Amelogenin, X isoform OS=Bos taurus OX=9913 GN=AMELX PE=1 SV=2	1	hf1_eb_18273_82_20032023.ScanId;v=1;d1=16657.16657.2	controllerType=0 controllerNumber=1 scan=16657	41.3851
17097:2	1	G.HPGYIN[+0.984]F.S		N[+1]	424.7	2	848.393	848.394	0	-1.3	25	Non	301.48	258.75	258.75	3.58	1125	>sp|P02817|AMELX_BOVIN Amelogenin, X isoform OS=Bos taurus OX=9913 GN=AMELX PE=1 SV=2	1	hf1_eb_18273_82_20032023.ScanId;v=1;d1=15509.15509.2	controllerType=0 controllerNumber=1 scan=15509	39.3179
18369:2	1	G.HPGYIN[+0.984]F.S		N[+1]	424.7	2	848.392	848.394	0	-1.5	25	Non	303.87	300.78	300.78	4.16	1125	>sp|P02817|AMELX_BOVIN Amelogenin, X isoform OS=Bos taurus OX=9913 GN=AMELX PE=1 SV=2	1	hf1_eb_18273_82_20032023.ScanId;v=1;d1=16462.16462.2	controllerType=0 controllerNumber=1 scan=16462	41.0323
18898:2	1	G.HPGYIN[+0.984]F.S		N[+1]	424.7	2	848.394	848.394	0	-0.2	25	Non	309.78	301.34	301.34	4.16	1125	>sp|P02817|AMELX_BOVIN Amelogenin, X isoform OS=Bos taurus OX=9913 GN=AMELX PE=1 SV=2	1	hf1_eb_18273_82_20032023.ScanId;v=1;d1=16851.16851.2	controllerType=0 controllerNumber=1 scan=16851	41.7263
16829:2	1	G.HPGYIN[+0.984]F.S		N[+1]	424.7	2	848.392	848.394	0	-2.3	25	Non	316.36	272.83	272.83	3.7	1125	>sp|P02817|AMELX_BOVIN Amelogenin, X isoform OS=Bos taurus OX=9913 GN=AMELX PE=1 SV=2	1	hf1_eb_18273_82_20032023.ScanId;v=1;d1=15310.15310.2	controllerType=0 controllerNumber=1 scan=15310	38.9699
16545:2	1	G.HPGYIN[+0.984]F.S		N[+1]	424.7	2	848.393	848.394	0	-0.7	25	Non	339.06	270.76	270.76	4.01	1125	>sp|P02817|AMELX_BOVIN Amelogenin, X isoform OS=Bos taurus OX=9913 GN=AMELX PE=1 SV=2	1	hf1_eb_18273_82_20032023.ScanId;v=1;d1=15107.15107.2	controllerType=0 controllerNumber=1 scan=15107	38.6289
17850:2	1	G.HPGYIN[+0.984]F.S		N[+1]	424.7	2	848.392	848.394	0	-2.2	25	Non	339.86	291.43	291.43	3.79	1125	>sp|P02817|AMELX_BOVIN Amelogenin, X isoform OS=Bos taurus OX=9913 GN=AMELX PE=1 SV=2	1	hf1_eb_18273_82_20032023.ScanId;v=1;d1=16078.16078.2	controllerType=0 controllerNumber=1 scan=16078	40.349
17186:2	1	G.HP[+15.995]GYIN[+0.984]F.S		N[+1], P[+16]	432.697	2	864.387	864.389	0	-2.3	25	Non	234.21	214.3	1.8	2.16	1125	>sp|P02817|AMELX_BOVIN Amelogenin, X isoform OS=Bos taurus OX=9913 GN=AMELX PE=1 SV=2	1	hf1_eb_18273_82_20032023.ScanId;v=1;d1=15574.15574.2	controllerType=0 controllerNumber=1 scan=15574	39.4403
15773:2	1	G.HP[+15.995]GYIN[+0.984]F.S		N[+1], P[+16]	432.698	2	864.388	864.389	0	-0.8	25	Non	248.55	185.71	1.8	3.03	1125	>sp|P02817|AMELX_BOVIN Amelogenin, X isoform OS=Bos taurus OX=9913 GN=AMELX PE=1 SV=2	1	hf1_eb_18273_82_20032023.ScanId;v=1;d1=14572.14572.2	controllerType=0 controllerNumber=1 scan=14572	37.7036
17515:2	1	G.HP[+15.995]GYIN[+0.984]F.S		N[+1], P[+16]	432.697	2	864.388	864.389	0	-1.2	25	Non	261.97	255.49	1.8	3.89	1125	>sp|P02817|AMELX_BOVIN Amelogenin, X isoform OS=Bos taurus OX=9913 GN=AMELX PE=1 SV=2	1	hf1_eb_18273_82_20032023.ScanId;v=1;d1=15819.15819.2	controllerType=0 controllerNumber=1 scan=15819	39.8782
15237:2	1	G.HPGYIN[+0.984]FS.Y		N[+1]	468.216	2	935.425	935.426	0	-1.2	25	Non	169.15	109.98	109.98	0.7	1125	>sp|P02817|AMELX_BOVIN Amelogenin, X isoform OS=Bos taurus OX=9913 GN=AMELX PE=1 SV=2	1	hf1_eb_18273_82_20032023.ScanId;v=1;d1=14180.14180.2	controllerType=0 controllerNumber=1 scan=14180	36.9847
16076:2	1	G.HPGYIN[+0.984]FS.Y		N[+1]	468.216	2	935.425	935.426	0	-0.5	25	Non	319.18	221	221	3.9	1125	>sp|P02817|AMELX_BOVIN Amelogenin, X isoform OS=Bos taurus OX=9913 GN=AMELX PE=1 SV=2	1	hf1_eb_18273_82_20032023.ScanId;v=1;d1=14774.14774.2	controllerType=0 controllerNumber=1 scan=14774	38.0464
18545:2	1	G.HPGYINFS[+79.966].Y		S[+80]	507.707	2	1014.41	1014.41	0	-0.4	25	Non	338.49	321.85	321.85	4.26	1125	>sp|P02817|AMELX_BOVIN Amelogenin, X isoform OS=Bos taurus OX=9913 GN=AMELX PE=1 SV=2	1	hf1_eb_18273_82_20032023.ScanId;v=1;d1=16604.16604.2	controllerType=0 controllerNumber=1 scan=16604	41.2911
20506:2	1	G.HPGYIN[+0.984]FS[+79.966].Y		N[+1], S[+80]	508.199	2	1015.39	1015.39	0	-0.6	25	Non	223.22	191.03	191.03	2.45	1125	>sp|P02817|AMELX_BOVIN Amelogenin, X isoform OS=Bos taurus OX=9913 GN=AMELX PE=1 SV=2	1	hf1_eb_18273_82_20032023.ScanId;v=1;d1=18065.18065.2	controllerType=0 controllerNumber=1 scan=18065	43.963
19916:2	1	G.HPGYIN[+0.984]FS[+79.966].Y		N[+1], S[+80]	508.199	2	1015.39	1015.39	0	-0.7	25	Non	302.23	254.1	254.1	4.06	1125	>sp|P02817|AMELX_BOVIN Amelogenin, X isoform OS=Bos taurus OX=9913 GN=AMELX PE=1 SV=2	1	hf1_eb_18273_82_20032023.ScanId;v=1;d1=17599.17599.2	controllerType=0 controllerNumber=1 scan=17599	43.086
20358:2	1	G.HPGYIN[+0.984]FS[+79.966].Y		N[+1], S[+80]	508.199	2	1015.39	1015.39	0	-1.2	25	Non	307.33	284.08	284.08	4.74	1125	>sp|P02817|AMELX_BOVIN Amelogenin, X isoform OS=Bos taurus OX=9913 GN=AMELX PE=1 SV=2	1	hf1_eb_18273_82_20032023.ScanId;v=1;d1=17956.17956.2	controllerType=0 controllerNumber=1 scan=17956	43.7607
19974:1	1	G.HPGYIN[+0.984]FS[+79.966].Y		N[+1], S[+80]	1015.39	1	1015.39	1015.39	0	-0.4	25	Non	318.8	273.82	273.82	4.98	1125	>sp|P02817|AMELX_BOVIN Amelogenin, X isoform OS=Bos taurus OX=9913 GN=AMELX PE=1 SV=2	1	hf1_eb_18273_82_20032023.ScanId;v=1;d1=17641.17641.2	controllerType=0 controllerNumber=1 scan=17641	43.1643
20196:1	1	G.HPGYIN[+0.984]FS[+79.966].Y		N[+1], S[+80]	1015.39	1	1015.39	1015.39	0	-1.7	25	Non	331.1	232.26	232.26	4.78	1125	>sp|P02817|AMELX_BOVIN Amelogenin, X isoform OS=Bos taurus OX=9913 GN=AMELX PE=1 SV=2	1	hf1_eb_18273_82_20032023.ScanId;v=1;d1=17824.17824.2	controllerType=0 controllerNumber=1 scan=17824	43.512
20141:2	1	G.HPGYIN[+0.984]FS[+79.966].Y		N[+1], S[+80]	508.199	2	1015.39	1015.39	0	-1.4	25	Non	346.65	273.79	273.79	4.46	1125	>sp|P02817|AMELX_BOVIN Amelogenin, X isoform OS=Bos taurus OX=9913 GN=AMELX PE=1 SV=2	1	hf1_eb_18273_82_20032023.ScanId;v=1;d1=17778.17778.2	controllerType=0 controllerNumber=1 scan=17778	43.4249
21620:2	1	G.HPGYIN[+0.984]FSY.E		N[+1]	549.748	2	1098.49	1098.49	0	-1.1	25	Non	265.05	265.05	265.05	3.45	1125	>sp|P02817|AMELX_BOVIN Amelogenin, X isoform OS=Bos taurus OX=9913 GN=AMELX PE=1 SV=2	1	hf1_eb_18273_82_20032023.ScanId;v=1;d1=18871.18871.2	controllerType=0 controllerNumber=1 scan=18871	45.4434
25645:2	1	G.HPGYIN[+0.984]FS[+79.966]Y.E		N[+1], S[+80]	589.73	2	1178.45	1178.46	0	-2.9	25	Non	203.96	181.06	181.06	2.09	1125	>sp|P02817|AMELX_BOVIN Amelogenin, X isoform OS=Bos taurus OX=9913 GN=AMELX PE=1 SV=2	1	hf1_eb_18273_82_20032023.ScanId;v=1;d1=21755.21755.2	controllerType=0 controllerNumber=1 scan=21755	50.682
22923:2	1	G.HPGYINFS[+79.966]YE.V		S[+80]	653.761	2	1306.51	1306.51	0	0.1	25	Non	146.48	116.68	116.68	1.45	1125	>sp|P02817|AMELX_BOVIN Amelogenin, X isoform OS=Bos taurus OX=9913 GN=AMELX PE=1 SV=2	1	hf1_eb_18273_82_20032023.ScanId;v=1;d1=19815.19815.2	controllerType=0 controllerNumber=1 scan=19815	47.1401
23995:2	1	G.HPGYIN[+0.984]FS[+79.966]YE.V		N[+1], S[+80]	654.252	2	1307.5	1307.5	0	-0.7	25	Non	101.02	51.44	51.44	0.65	1125	>sp|P02817|AMELX_BOVIN Amelogenin, X isoform OS=Bos taurus OX=9913 GN=AMELX PE=1 SV=2	1	hf1_eb_18273_82_20032023.ScanId;v=1;d1=20568.20568.3	controllerType=0 controllerNumber=1 scan=20568	48.5159
32208:2	1	G.HPGYINFS[+79.966]YEVL.T		S[+80]	759.838	2	1518.67	1518.67	0	1.1	25	Non	197.99	189.78	189.78	2.61	1125	>sp|P02817|AMELX_BOVIN Amelogenin, X isoform OS=Bos taurus OX=9913 GN=AMELX PE=1 SV=2	1	hf1_eb_18273_82_20032023.ScanId;v=1;d1=26355.26355.2	controllerType=0 controllerNumber=1 scan=26355	59.0079
33191:2	1	G.HPGYIN[+0.984]FS[+79.966]YEVL.T		N[+1], S[+80]	760.329	2	1519.65	1519.65	0	0.2	25	Non	127.42	127.42	127.42	1.79	1125	>sp|P02817|AMELX_BOVIN Amelogenin, X isoform OS=Bos taurus OX=9913 GN=AMELX PE=1 SV=2	1	hf1_eb_18273_82_20032023.ScanId;v=1;d1=27027.27027.2	controllerType=0 controllerNumber=1 scan=27027	60.2642
31277:2	1	G.HPGYIN[+0.984]FS[+79.966]YEVLT.P		N[+1], S[+80]	810.853	2	1620.7	1620.7	0	0.5	25	Non	70.47	70.47	70.47	0.77	1125	>sp|P02817|AMELX_BOVIN Amelogenin, X isoform OS=Bos taurus OX=9913 GN=AMELX PE=1 SV=2	1	hf1_eb_18273_82_20032023.ScanId;v=1;d1=25691.25691.2	controllerType=0 controllerNumber=1 scan=25691	57.783
32984:2	1	G.HPGYIN[+0.984]FS[+79.966]YEVLTP.L		N[+1], S[+80]	859.38	2	1717.75	1717.75	0	0.4	25	Non	52.58	52.58	52.58	0.77	1125	>sp|P02817|AMELX_BOVIN Amelogenin, X isoform OS=Bos taurus OX=9913 GN=AMELX PE=1 SV=2	1	hf1_eb_18273_82_20032023.ScanId;v=1;d1=26886.26886.2	controllerType=0 controllerNumber=1 scan=26886	60.0014
35917:2	1	G.HPGYINFS[+79.966]YEVLTPL.K		S[+80]	915.429	2	1829.85	1829.85	0	-0.3	25	Non	66.51	37.83	37.83	0.66	1125	>sp|P02817|AMELX_BOVIN Amelogenin, X isoform OS=Bos taurus OX=9913 GN=AMELX PE=1 SV=2	1	hf1_eb_18273_82_20032023.ScanId;v=1;d1=28922.28922.2	controllerType=0 controllerNumber=1 scan=28922	63.8198
34703:2	1	G.HPGYIN[+0.984]FSYEVLTPL.K		N[+1]	875.937	2	1750.87	1750.87	0	-1.2	25	Non	103.17	103.17	103.17	2.13	1125	>sp|P02817|AMELX_BOVIN Amelogenin, X isoform OS=Bos taurus OX=9913 GN=AMELX PE=1 SV=2	1	hf1_eb_18273_82_20032023.ScanId;v=1;d1=28082.28082.2	controllerType=0 controllerNumber=1 scan=28082	62.2493
35169:2	1	G.HPGYIN[+0.984]FSYEVLTPL.K		N[+1]	875.937	2	1750.87	1750.87	0	-1.1	25	Non	147.7	147.7	147.7	2.46	1125	>sp|P02817|AMELX_BOVIN Amelogenin, X isoform OS=Bos taurus OX=9913 GN=AMELX PE=1 SV=2	1	hf1_eb_18273_82_20032023.ScanId;v=1;d1=28405.28405.2	controllerType=0 controllerNumber=1 scan=28405	62.8476
34424:2	1	G.HPGYIN[+0.984]FSYEVLTPL.K		N[+1]	875.937	2	1750.87	1750.87	0	-1.7	25	Non	302.15	276.49	276.49	5.16	1125	>sp|P02817|AMELX_BOVIN Amelogenin, X isoform OS=Bos taurus OX=9913 GN=AMELX PE=1 SV=2	1	hf1_eb_18273_82_20032023.ScanId;v=1;d1=27892.27892.2	controllerType=0 controllerNumber=1 scan=27892	61.8983
31018:2	1	G.HPGYINFS[+79.966]YEVLTPLK.W		S[+80]	979.478	2	1957.95	1957.95	0	1.7	25	NRagged	61.62	61.62	8.02	2.38	1125	>sp|P02817|AMELX_BOVIN Amelogenin, X isoform OS=Bos taurus OX=9913 GN=AMELX PE=1 SV=2	1	hf1_eb_18273_82_20032023.ScanId;v=1;d1=25511.25511.3	controllerType=0 controllerNumber=1 scan=25511	57.4579
28897:2	1	G.HPGYIN[+0.984]FSYEVLTPLK.W		N[+1]	939.983	2	1878.96	1878.96	0	-2.2	25	NRagged	195.4	195.4	195.4	3.06	1125	>sp|P02817|AMELX_BOVIN Amelogenin, X isoform OS=Bos taurus OX=9913 GN=AMELX PE=1 SV=2	1	hf1_eb_18273_82_20032023.ScanId;v=1;d1=24005.24005.2	controllerType=0 controllerNumber=1 scan=24005	54.7269
28883:2	1	G.HPGYIN[+0.984]FSYEVLTPLK.W		N[+1]	939.986	2	1878.96	1878.96	0	0.7	25	NRagged	200.87	200.87	200.87	4.35	1125	>sp|P02817|AMELX_BOVIN Amelogenin, X isoform OS=Bos taurus OX=9913 GN=AMELX PE=1 SV=2	1	hf1_eb_18273_82_20032023.ScanId;v=1;d1=23996.23996.3	controllerType=0 controllerNumber=1 scan=23996	54.7106
28927:3	1	G.HPGYIN[+0.984]FSYEVLTPLK.W		N[+1]	626.992	3	1878.96	1878.96	0	-0.6	25	NRagged	476.16	476.16	476.16	7.99	1125	>sp|P02817|AMELX_BOVIN Amelogenin, X isoform OS=Bos taurus OX=9913 GN=AMELX PE=1 SV=2	1	hf1_eb_18273_82_20032023.ScanId;v=1;d1=24025.24025.3	controllerType=0 controllerNumber=1 scan=24025	54.7626
29883:3	1	G.HPGYIN[+0.984]FSYEVLTPLK.W		N[+1]	626.992	3	1878.96	1878.96	0	-0.7	25	NRagged	496.24	496.24	496.24	8.01	1125	>sp|P02817|AMELX_BOVIN Amelogenin, X isoform OS=Bos taurus OX=9913 GN=AMELX PE=1 SV=2	1	hf1_eb_18273_82_20032023.ScanId;v=1;d1=24698.24698.3	controllerType=0 controllerNumber=1 scan=24698	55.9841
31034:3	1	G.HPGYINFS[+79.966]YEVLTPLK.W		S[+80]	653.321	3	1957.95	1957.95	0	0.5	25	NRagged	543.76	543.76	338.53	8.08	1125	>sp|P02817|AMELX_BOVIN Amelogenin, X isoform OS=Bos taurus OX=9913 GN=AMELX PE=1 SV=2	1	hf1_eb_18273_82_20032023.ScanId;v=1;d1=25523.25523.3	controllerType=0 controllerNumber=1 scan=25523	57.4786
31003:2	1	G.HPGYINFS[+79.966]YEVLTPLK.W		S[+80]	979.478	2	1957.95	1957.95	0	1.9	25	NRagged	620.31	620.31	401.5	10.02	1125	>sp|P02817|AMELX_BOVIN Amelogenin, X isoform OS=Bos taurus OX=9913 GN=AMELX PE=1 SV=2	1	hf1_eb_18273_82_20032023.ScanId;v=1;d1=25501.25501.2	controllerType=0 controllerNumber=1 scan=25501	57.4399
30375:2	1	G.HPGYIN[+0.984]FS[+79.966]YEVLTPLK.W		N[+1], S[+80]	979.968	2	1958.93	1958.93	0	-1	25	NRagged	35.58	35.58	35.58	2.2	1125	>sp|P02817|AMELX_BOVIN Amelogenin, X isoform OS=Bos taurus OX=9913 GN=AMELX PE=1 SV=2	1	hf1_eb_18273_82_20032023.ScanId;v=1;d1=25057.25057.2	controllerType=0 controllerNumber=1 scan=25057	56.6318
30568:2	1	G.HP[+15.995]GYINFS[+79.966]YEVLTPLK.W		P[+16], S[+80]	987.475	2	1973.94	1973.94	0	0.7	25	NRagged	67.16	67.16	1.8	2.38	1125	>sp|P02817|AMELX_BOVIN Amelogenin, X isoform OS=Bos taurus OX=9913 GN=AMELX PE=1 SV=2	1	hf1_eb_18273_82_20032023.ScanId;v=1;d1=25205.25205.2	controllerType=0 controllerNumber=1 scan=25205	56.9115
31863:2	1	G.HPGYIN[+0.984]FS[+79.966]YEVLTPLK.W		N[+1], S[+80]	979.969	2	1958.93	1958.93	0	0.7	25	NRagged	114.63	114.63	6.98	2.62	1125	>sp|P02817|AMELX_BOVIN Amelogenin, X isoform OS=Bos taurus OX=9913 GN=AMELX PE=1 SV=2	1	hf1_eb_18273_82_20032023.ScanId;v=1;d1=26111.26111.2	controllerType=0 controllerNumber=1 scan=26111	58.555
32202:3	1	G.HPGYIN[+0.984]FS[+79.966]YEVLTPLK.W		N[+1], S[+80]	653.649	3	1958.93	1958.93	0	0.7	25	NRagged	267.27	267.27	162.98	6.26	1125	>sp|P02817|AMELX_BOVIN Amelogenin, X isoform OS=Bos taurus OX=9913 GN=AMELX PE=1 SV=2	1	hf1_eb_18273_82_20032023.ScanId;v=1;d1=26350.26350.3	controllerType=0 controllerNumber=1 scan=26350	58.9975
31307:3	1	G.HPGYIN[+0.984]FS[+79.966]YEVLTPLK.W		N[+1], S[+80]	653.648	3	1958.93	1958.93	0	-0.5	25	NRagged	371.87	371.87	215.46	7.57	1125	>sp|P02817|AMELX_BOVIN Amelogenin, X isoform OS=Bos taurus OX=9913 GN=AMELX PE=1 SV=2	1	hf1_eb_18273_82_20032023.ScanId;v=1;d1=25710.25710.3	controllerType=0 controllerNumber=1 scan=25710	57.8203
31586:2	1	G.HPGYIN[+0.984]FS[+79.966]YEVLTPLK.W		N[+1], S[+80]	979.968	2	1958.93	1958.93	0	-0.4	25	NRagged	542.65	542.65	238.79	8.16	1125	>sp|P02817|AMELX_BOVIN Amelogenin, X isoform OS=Bos taurus OX=9913 GN=AMELX PE=1 SV=2	1	hf1_eb_18273_82_20032023.ScanId;v=1;d1=25912.25912.2	controllerType=0 controllerNumber=1 scan=25912	58.1914
31285:2	1	G.HPGYIN[+0.984]FS[+79.966]YEVLTPLK.W		N[+1], S[+80]	979.97	2	1958.93	1958.93	0	1.2	25	NRagged	625.32	625.32	397.65	10.02	1125	>sp|P02817|AMELX_BOVIN Amelogenin, X isoform OS=Bos taurus OX=9913 GN=AMELX PE=1 SV=2	1	hf1_eb_18273_82_20032023.ScanId;v=1;d1=25696.25696.2	controllerType=0 controllerNumber=1 scan=25696	57.7934
32136:2	1	G.HPGYIN[+0.984]FS[+79.966]YEVLTPLK.W		N[+1], S[+80]	979.97	2	1958.93	1958.93	0	1.8	25	NRagged	681.28	681.28	417.31	11.02	1125	>sp|P02817|AMELX_BOVIN Amelogenin, X isoform OS=Bos taurus OX=9913 GN=AMELX PE=1 SV=2	1	hf1_eb_18273_82_20032023.ScanId;v=1;d1=26302.26302.2	controllerType=0 controllerNumber=1 scan=26302	58.905
31500:3	1	G.HP[+15.995]GYIN[+0.984]FS[+79.966]YEVLTPLK.W		N[+1], P[+16], S[+80]	658.976	3	1974.91	1974.92	0	-5.4	25	NRagged	69.14	69.14	1.8	0.94	1125	>sp|P02817|AMELX_BOVIN Amelogenin, X isoform OS=Bos taurus OX=9913 GN=AMELX PE=1 SV=2	1	hf1_eb_18273_82_20032023.ScanId;v=1;d1=25846.25846.3	controllerType=0 controllerNumber=1 scan=25846	58.0627
07397:1	1	H.P[+15.995]GYIN[+0.984].F		N[+1], P[+16]	580.261	1	580.261	580.261	0	-0.2	26	Non	237.74	237.74	114	2.11	1125	>sp|P02817|AMELX_BOVIN Amelogenin, X isoform OS=Bos taurus OX=9913 GN=AMELX PE=1 SV=2	1	hf1_eb_18273_82_20032023.ScanId;v=1;d1=8202.8202.2	controllerType=0 controllerNumber=1 scan=8202	25.6026
19361:1	1	H.PGYINF.S			710.35	1	710.35	710.351	0	-1	26	Non	197.17	174.36	174.36	0.87	1125	>sp|P02817|AMELX_BOVIN Amelogenin, X isoform OS=Bos taurus OX=9913 GN=AMELX PE=1 SV=2	1	hf1_eb_18273_82_20032023.ScanId;v=1;d1=17184.17184.2	controllerType=0 controllerNumber=1 scan=17184	42.3234
21865:1	1	H.PGYINF.S			710.351	1	710.351	710.351	0	1	26	Non	250.58	238.19	238.19	3.26	1125	>sp|P02817|AMELX_BOVIN Amelogenin, X isoform OS=Bos taurus OX=9913 GN=AMELX PE=1 SV=2	1	hf1_eb_18273_82_20032023.ScanId;v=1;d1=19050.19050.2	controllerType=0 controllerNumber=1 scan=19050	45.757
25210:1	1	H.PGYIN[+0.984]F.S		N[+1]	711.334	1	711.334	711.335	0	-0.7	26	Non	181.66	181.66	181.66	2.19	1125	>sp|P02817|AMELX_BOVIN Amelogenin, X isoform OS=Bos taurus OX=9913 GN=AMELX PE=1 SV=2	1	hf1_eb_18273_82_20032023.ScanId;v=1;d1=21444.21444.2	controllerType=0 controllerNumber=1 scan=21444	50.107
27475:1	1	H.PGYIN[+0.984]F.S		N[+1]	711.334	1	711.334	711.335	0	-0.9	26	Non	230.84	216.22	216.22	2.31	1125	>sp|P02817|AMELX_BOVIN Amelogenin, X isoform OS=Bos taurus OX=9913 GN=AMELX PE=1 SV=2	1	hf1_eb_18273_82_20032023.ScanId;v=1;d1=23034.23034.2	controllerType=0 controllerNumber=1 scan=23034	53.0044
25338:1	1	H.PGYIN[+0.984]F.S		N[+1]	711.335	1	711.335	711.335	0	-0.1	26	Non	240.11	239.82	239.82	3.28	1125	>sp|P02817|AMELX_BOVIN Amelogenin, X isoform OS=Bos taurus OX=9913 GN=AMELX PE=1 SV=2	1	hf1_eb_18273_82_20032023.ScanId;v=1;d1=21535.21535.2	controllerType=0 controllerNumber=1 scan=21535	50.2768
22575:1	1	H.PGYIN[+0.984]F.S		N[+1]	711.335	1	711.335	711.335	0	0.2	26	Non	266	193.02	193.02	3.02	1125	>sp|P02817|AMELX_BOVIN Amelogenin, X isoform OS=Bos taurus OX=9913 GN=AMELX PE=1 SV=2	1	hf1_eb_18273_82_20032023.ScanId;v=1;d1=19567.19567.2	controllerType=0 controllerNumber=1 scan=19567	46.6747
25572:1	1	H.PGYIN[+0.984]F.S		N[+1]	711.335	1	711.335	711.335	0	0.6	26	Non	314.12	251.55	251.55	3.57	1125	>sp|P02817|AMELX_BOVIN Amelogenin, X isoform OS=Bos taurus OX=9913 GN=AMELX PE=1 SV=2	1	hf1_eb_18273_82_20032023.ScanId;v=1;d1=21699.21699.2	controllerType=0 controllerNumber=1 scan=21699	50.5736
22689:1	1	H.PGYIN[+0.984]F.S		N[+1]	711.336	1	711.336	711.335	0	1.3	26	Non	345.59	227.86	227.86	3.38	1125	>sp|P02817|AMELX_BOVIN Amelogenin, X isoform OS=Bos taurus OX=9913 GN=AMELX PE=1 SV=2	1	hf1_eb_18273_82_20032023.ScanId;v=1;d1=19648.19648.2	controllerType=0 controllerNumber=1 scan=19648	46.8304
24595:1	1	H.PGYIN[+0.984]F.S		N[+1]	711.335	1	711.335	711.335	0	-0.4	26	Non	366.03	210.26	210.26	3.53	1125	>sp|P02817|AMELX_BOVIN Amelogenin, X isoform OS=Bos taurus OX=9913 GN=AMELX PE=1 SV=2	1	hf1_eb_18273_82_20032023.ScanId;v=1;d1=21017.21017.2	controllerType=0 controllerNumber=1 scan=21017	49.3339
25289:1	1	H.PGYIN[+0.984]F.S		N[+1]	711.334	1	711.334	711.335	0	-0.7	26	Non	382.69	295.92	295.92	4.27	1125	>sp|P02817|AMELX_BOVIN Amelogenin, X isoform OS=Bos taurus OX=9913 GN=AMELX PE=1 SV=2	1	hf1_eb_18273_82_20032023.ScanId;v=1;d1=21501.21501.2	controllerType=0 controllerNumber=1 scan=21501	50.2147
20841:1	1	H.PGYINFS.Y			797.378	1	797.378	797.383	0	-5.8	26	Non	178.24	166.14	166.14	0.55	1125	>sp|P02817|AMELX_BOVIN Amelogenin, X isoform OS=Bos taurus OX=9913 GN=AMELX PE=1 SV=2	1	hf1_eb_18273_82_20032023.ScanId;v=1;d1=18310.18310.3	controllerType=0 controllerNumber=1 scan=18310	44.419
21675:1	1	H.PGYIN[+0.984]FS.Y		N[+1]	798.366	1	798.366	798.367	0	-1.4	26	Non	136.4	136.4	136.4	0.88	1125	>sp|P02817|AMELX_BOVIN Amelogenin, X isoform OS=Bos taurus OX=9913 GN=AMELX PE=1 SV=2	1	hf1_eb_18273_82_20032023.ScanId;v=1;d1=18910.18910.2	controllerType=0 controllerNumber=1 scan=18910	45.515
21684:1	1	H.PGYIN[+0.984]FS.Y		N[+1]	798.367	1	798.367	798.367	0	-0.2	26	Non	204.57	195.88	195.88	1.34	1125	>sp|P02817|AMELX_BOVIN Amelogenin, X isoform OS=Bos taurus OX=9913 GN=AMELX PE=1 SV=2	1	hf1_eb_18273_82_20032023.ScanId;v=1;d1=18919.18919.2	controllerType=0 controllerNumber=1 scan=18919	45.5333
23675:1	1	H.PGYINFS[+79.966].Y		S[+80]	877.347	1	877.347	877.349	0	-2.1	26	Non	263.99	263.99	263.99	4.21	1125	>sp|P02817|AMELX_BOVIN Amelogenin, X isoform OS=Bos taurus OX=9913 GN=AMELX PE=1 SV=2	1	hf1_eb_18273_82_20032023.ScanId;v=1;d1=20349.20349.2	controllerType=0 controllerNumber=1 scan=20349	48.1216
26102:1	1	H.PGYIN[+0.984]FS[+79.966].Y		N[+1], S[+80]	878.331	1	878.331	878.333	0	-2.1	26	Non	69.29	69.29	69.29	0.72	1125	>sp|P02817|AMELX_BOVIN Amelogenin, X isoform OS=Bos taurus OX=9913 GN=AMELX PE=1 SV=2	1	hf1_eb_18273_82_20032023.ScanId;v=1;d1=22097.22097.2	controllerType=0 controllerNumber=1 scan=22097	51.3139
24055:1	1	H.PGYIN[+0.984]FS[+79.966].Y		N[+1], S[+80]	878.331	1	878.331	878.333	0	-2.1	26	Non	102.43	102.43	102.43	1.34	1125	>sp|P02817|AMELX_BOVIN Amelogenin, X isoform OS=Bos taurus OX=9913 GN=AMELX PE=1 SV=2	1	hf1_eb_18273_82_20032023.ScanId;v=1;d1=20611.20611.2	controllerType=0 controllerNumber=1 scan=20611	48.597
24906:1	1	H.PGYIN[+0.984]FS[+79.966].Y		N[+1], S[+80]	878.334	1	878.334	878.333	0	1.1	26	Non	134.03	134.03	134.03	2.12	1125	>sp|P02817|AMELX_BOVIN Amelogenin, X isoform OS=Bos taurus OX=9913 GN=AMELX PE=1 SV=2	1	hf1_eb_18273_82_20032023.ScanId;v=1;d1=21237.21237.2	controllerType=0 controllerNumber=1 scan=21237	49.7324
25841:1	1	H.PGYIN[+0.984]FS[+79.966].Y		N[+1], S[+80]	878.33	1	878.33	878.333	0	-3.9	26	Non	302.04	302.04	302.04	4.05	1125	>sp|P02817|AMELX_BOVIN Amelogenin, X isoform OS=Bos taurus OX=9913 GN=AMELX PE=1 SV=2	1	hf1_eb_18273_82_20032023.ScanId;v=1;d1=21904.21904.2	controllerType=0 controllerNumber=1 scan=21904	50.9639
21289:3	1	H.PGYINF[+15.995]SYEVLTPL.K		F[+16]	543.611	3	1628.82	1628.82	0	-0.7	26	Non	49.17	49.17	0	0.59	1125	>sp|P02817|AMELX_BOVIN Amelogenin, X isoform OS=Bos taurus OX=9913 GN=AMELX PE=1 SV=2	1	hf1_eb_18273_82_20032023.ScanId;v=1;d1=18639.18639.3	controllerType=0 controllerNumber=1 scan=18639	45.0218
36466:2	1	H.PGYIN[+0.984]FS[+79.966]YEVLTPL.K		N[+1], S[+80]	847.394	2	1693.78	1693.78	0	2.3	26	Non	220.57	220.57	220.57	2.21	1125	>sp|P02817|AMELX_BOVIN Amelogenin, X isoform OS=Bos taurus OX=9913 GN=AMELX PE=1 SV=2	1	hf1_eb_18273_82_20032023.ScanId;v=1;d1=29314.29314.2	controllerType=0 controllerNumber=1 scan=29314	64.4815
34486:2	1	H.PGYINFS[+79.966]YEVLTPLK.W		S[+80]	910.951	2	1820.89	1820.89	0	3.7	26	NRagged	57.66	57.66	57.66	1.01	1125	>sp|P02817|AMELX_BOVIN Amelogenin, X isoform OS=Bos taurus OX=9913 GN=AMELX PE=1 SV=2	1	hf1_eb_18273_82_20032023.ScanId;v=1;d1=27935.27935.2	controllerType=0 controllerNumber=1 scan=27935	61.9779
33779:2	1	H.PGYIN[+0.984]FSYEVLTPLK.W		N[+1]	871.456	2	1741.9	1741.9	0	0	26	NRagged	82.83	82.83	82.83	3.25	1125	>sp|P02817|AMELX_BOVIN Amelogenin, X isoform OS=Bos taurus OX=9913 GN=AMELX PE=1 SV=2	1	hf1_eb_18273_82_20032023.ScanId;v=1;d1=27441.27441.2	controllerType=0 controllerNumber=1 scan=27441	61.0382
34081:2	1	H.PGYIN[+0.984]FSYEVLTPLK.W		N[+1]	871.459	2	1741.91	1741.9	0	3.6	26	NRagged	421.74	421.74	421.74	6.82	1125	>sp|P02817|AMELX_BOVIN Amelogenin, X isoform OS=Bos taurus OX=9913 GN=AMELX PE=1 SV=2	1	hf1_eb_18273_82_20032023.ScanId;v=1;d1=27658.27658.2	controllerType=0 controllerNumber=1 scan=27658	61.4529
35289:2	1	H.PGYINFS[+79.966]YEVLTPLK.W		S[+80]	910.948	2	1820.89	1820.89	0	0.7	26	NRagged	781.27	703.14	560.54	12.54	1125	>sp|P02817|AMELX_BOVIN Amelogenin, X isoform OS=Bos taurus OX=9913 GN=AMELX PE=1 SV=2	1	hf1_eb_18273_82_20032023.ScanId;v=1;d1=28491.28491.2	controllerType=0 controllerNumber=1 scan=28491	63.0131
34767:2	1	H.PGYIN[+0.984]FS[+79.966]YEVLTPLK.W		N[+1], S[+80]	911.44	2	1821.87	1821.87	0	0.9	26	NRagged	388.26	388.26	216.96	7.97	1125	>sp|P02817|AMELX_BOVIN Amelogenin, X isoform OS=Bos taurus OX=9913 GN=AMELX PE=1 SV=2	1	hf1_eb_18273_82_20032023.ScanId;v=1;d1=28127.28127.2	controllerType=0 controllerNumber=1 scan=28127	62.3343
35100:2	1	H.PGYIN[+0.984]FS[+79.966]YEVLTPLK.W		N[+1], S[+80]	911.439	2	1821.87	1821.87	0	-0.4	26	NRagged	478.3	478.3	328.01	7.99	1125	>sp|P02817|AMELX_BOVIN Amelogenin, X isoform OS=Bos taurus OX=9913 GN=AMELX PE=1 SV=2	1	hf1_eb_18273_82_20032023.ScanId;v=1;d1=28355.28355.2	controllerType=0 controllerNumber=1 scan=28355	62.7518
35785:2	1	H.PGYIN[+0.984]FS[+79.966]YEVLTPLK.W		N[+1], S[+80]	911.439	2	1821.87	1821.87	0	-0.4	26	NRagged	816.42	776.22	597.35	13.55	1125	>sp|P02817|AMELX_BOVIN Amelogenin, X isoform OS=Bos taurus OX=9913 GN=AMELX PE=1 SV=2	1	hf1_eb_18273_82_20032023.ScanId;v=1;d1=28832.28832.2	controllerType=0 controllerNumber=1 scan=28832	63.6607
34550:2	1	H.P[+15.995]GYIN[+0.984]FS[+79.966]YEVLTPLK.W		N[+1], P[+16], S[+80]	919.438	2	1837.87	1837.87	0	1.2	26	NRagged	64.99	64.99	0	2.15	1125	>sp|P02817|AMELX_BOVIN Amelogenin, X isoform OS=Bos taurus OX=9913 GN=AMELX PE=1 SV=2	1	hf1_eb_18273_82_20032023.ScanId;v=1;d1=27977.27977.2	controllerType=0 controllerNumber=1 scan=27977	62.053
05527:1	1	P.GYIN.F			466.229	1	466.229	466.23	0	-0.7	27	Non	165.35	165.35	165.35	0.59	1125	>sp|P02817|AMELX_BOVIN Amelogenin, X isoform OS=Bos taurus OX=9913 GN=AMELX PE=1 SV=2	1	hf1_eb_18273_82_20032023.ScanId;v=1;d1=6665.6665.2	controllerType=0 controllerNumber=1 scan=6665	22.3879
23468:1	1	P.GYIN[+0.984]F.S		N[+1]	614.282	1	614.282	614.282	0	-0.8	27	Non	161.78	161.78	161.78	1.02	1125	>sp|P02817|AMELX_BOVIN Amelogenin, X isoform OS=Bos taurus OX=9913 GN=AMELX PE=1 SV=2	1	hf1_eb_18273_82_20032023.ScanId;v=1;d1=20195.20195.2	controllerType=0 controllerNumber=1 scan=20195	47.8439
23554:1	1	P.GYIN[+0.984]F.S		N[+1]	614.282	1	614.282	614.282	0	-0.8	27	Non	256.83	256.83	256.83	2.97	1125	>sp|P02817|AMELX_BOVIN Amelogenin, X isoform OS=Bos taurus OX=9913 GN=AMELX PE=1 SV=2	1	hf1_eb_18273_82_20032023.ScanId;v=1;d1=20259.20259.2	controllerType=0 controllerNumber=1 scan=20259	47.9615
21704:1	1	P.GYIN[+0.984]F.S		N[+1]	614.282	1	614.282	614.282	0	-0.8	27	Non	301.48	266.2	266.2	2.5	1125	>sp|P02817|AMELX_BOVIN Amelogenin, X isoform OS=Bos taurus OX=9913 GN=AMELX PE=1 SV=2	1	hf1_eb_18273_82_20032023.ScanId;v=1;d1=18931.18931.2	controllerType=0 controllerNumber=1 scan=18931	45.5531
15046:1	1	P.GYIN[+0.984]F[+15.995].S		F[+16], N[+1]	630.275	1	630.275	630.277	0	-2.6	27	Non	259.31	245.97	182.99	2.22	1125	>sp|P02817|AMELX_BOVIN Amelogenin, X isoform OS=Bos taurus OX=9913 GN=AMELX PE=1 SV=2	1	hf1_eb_18273_82_20032023.ScanId;v=1;d1=14039.14039.2	controllerType=0 controllerNumber=1 scan=14039	36.7176
36137:2	1	P.GYIN[+0.984]FS[+79.966]YEVL.T		N[+1], S[+80]	643.273	2	1285.54	1285.54	0	-0.9	27	Non	120.62	103.32	103.32	0.63	1125	>sp|P02817|AMELX_BOVIN Amelogenin, X isoform OS=Bos taurus OX=9913 GN=AMELX PE=1 SV=2	1	hf1_eb_18273_82_20032023.ScanId;v=1;d1=29074.29074.2	controllerType=0 controllerNumber=1 scan=29074	64.0772
34045:2	1	P.GYIN[+0.984]FSYEVLTP.L		N[+1]	702.341	2	1403.67	1403.67	0	0.6	27	Non	56.89	56.89	56.89	0.36	1125	>sp|P02817|AMELX_BOVIN Amelogenin, X isoform OS=Bos taurus OX=9913 GN=AMELX PE=1 SV=2	1	hf1_eb_18273_82_20032023.ScanId;v=1;d1=27625.27625.2	controllerType=0 controllerNumber=1 scan=27625	61.3851
36022:2	1	P.GYIN[+0.984]FS[+79.966]YEVLTP.L		N[+1], S[+80]	742.322	2	1483.64	1483.64	0	-2	27	Non	162.56	85.32	85.32	0.37	1125	>sp|P02817|AMELX_BOVIN Amelogenin, X isoform OS=Bos taurus OX=9913 GN=AMELX PE=1 SV=2	1	hf1_eb_18273_82_20032023.ScanId;v=1;d1=28994.28994.2	controllerType=0 controllerNumber=1 scan=28994	63.9416
34823:2	1	P.GYINFSYEVLTPL.K			758.39	2	1515.77	1515.77	0	0	27	Non	208.64	208.64	208.64	2.34	1125	>sp|P02817|AMELX_BOVIN Amelogenin, X isoform OS=Bos taurus OX=9913 GN=AMELX PE=1 SV=2	1	hf1_eb_18273_82_20032023.ScanId;v=1;d1=28165.28165.2	controllerType=0 controllerNumber=1 scan=28165	62.4031
36422:2	1	P.GYINFS[+79.966]YEVLTPL.K		S[+80]	798.376	2	1595.74	1595.74	0	3.4	27	Non	113.48	113.48	113.48	0.56	1125	>sp|P02817|AMELX_BOVIN Amelogenin, X isoform OS=Bos taurus OX=9913 GN=AMELX PE=1 SV=2	1	hf1_eb_18273_82_20032023.ScanId;v=1;d1=29282.29282.2	controllerType=0 controllerNumber=1 scan=29282	64.4267
34454:2	1	P.GYINFSYEVLTPLK.W			822.438	2	1643.87	1643.87	0	1	27	NRagged	88.45	88.45	88.45	2.61	1125	>sp|P02817|AMELX_BOVIN Amelogenin, X isoform OS=Bos taurus OX=9913 GN=AMELX PE=1 SV=2	1	hf1_eb_18273_82_20032023.ScanId;v=1;d1=27911.27911.2	controllerType=0 controllerNumber=1 scan=27911	61.9328
31275:2	1	P.GYINFSYEVLTPLK.W			822.438	2	1643.87	1643.87	0	0.8	27	NRagged	99.34	99.34	99.34	2.61	1125	>sp|P02817|AMELX_BOVIN Amelogenin, X isoform OS=Bos taurus OX=9913 GN=AMELX PE=1 SV=2	1	hf1_eb_18273_82_20032023.ScanId;v=1;d1=25689.25689.2	controllerType=0 controllerNumber=1 scan=25689	57.7799
28248:3	1	P.GYINFSYEVLTPLK.W			548.627	3	1643.87	1643.87	0	-0.4	27	NRagged	210.33	210.33	210.33	4.26	1125	>sp|P02817|AMELX_BOVIN Amelogenin, X isoform OS=Bos taurus OX=9913 GN=AMELX PE=1 SV=2	1	hf1_eb_18273_82_20032023.ScanId;v=1;d1=23562.23562.3	controllerType=0 controllerNumber=1 scan=23562	53.945
27998:2	1	P.GYINFSYEVLTPLK.W			822.439	2	1643.87	1643.87	0	1.7	27	NRagged	256.64	256.64	256.64	6.01	1125	>sp|P02817|AMELX_BOVIN Amelogenin, X isoform OS=Bos taurus OX=9913 GN=AMELX PE=1 SV=2	1	hf1_eb_18273_82_20032023.ScanId;v=1;d1=23388.23388.2	controllerType=0 controllerNumber=1 scan=23388	53.6365
27939:3	1	P.GYINFSYEVLTPLK.W			548.627	3	1643.87	1643.87	0	-0.2	27	NRagged	327.04	292.99	292.99	5.76	1125	>sp|P02817|AMELX_BOVIN Amelogenin, X isoform OS=Bos taurus OX=9913 GN=AMELX PE=1 SV=2	1	hf1_eb_18273_82_20032023.ScanId;v=1;d1=23351.23351.3	controllerType=0 controllerNumber=1 scan=23351	53.5733
32782:2	1	P.GYIN[+0.984]FSYEVLTPLK.W		N[+1]	822.93	2	1644.85	1644.85	0	0.5	27	NRagged	41.92	41.92	41.92	2.38	1125	>sp|P02817|AMELX_BOVIN Amelogenin, X isoform OS=Bos taurus OX=9913 GN=AMELX PE=1 SV=2	1	hf1_eb_18273_82_20032023.ScanId;v=1;d1=26751.26751.2	controllerType=0 controllerNumber=1 scan=26751	59.7447
32966:2	1	P.GYIN[+0.984]FSYEVLTPLK.W		N[+1]	822.933	2	1644.86	1644.85	0	4.2	27	NRagged	229	229	229	3.26	1125	>sp|P02817|AMELX_BOVIN Amelogenin, X isoform OS=Bos taurus OX=9913 GN=AMELX PE=1 SV=2	1	hf1_eb_18273_82_20032023.ScanId;v=1;d1=26876.26876.2	controllerType=0 controllerNumber=1 scan=26876	59.9834
30108:3	1	P.GYIN[+0.984]FSYEVLTPLK.W		N[+1]	548.956	3	1644.85	1644.85	0	0.1	27	NRagged	229.8	229.8	229.8	4.25	1125	>sp|P02817|AMELX_BOVIN Amelogenin, X isoform OS=Bos taurus OX=9913 GN=AMELX PE=1 SV=2	1	hf1_eb_18273_82_20032023.ScanId;v=1;d1=24858.24858.3	controllerType=0 controllerNumber=1 scan=24858	56.2683
29302:3	1	P.GYIN[+0.984]FSYEVLTPLK.W		N[+1]	548.955	3	1644.85	1644.85	0	-0.3	27	NRagged	254.6	254.6	254.6	5.08	1125	>sp|P02817|AMELX_BOVIN Amelogenin, X isoform OS=Bos taurus OX=9913 GN=AMELX PE=1 SV=2	1	hf1_eb_18273_82_20032023.ScanId;v=1;d1=24288.24288.3	controllerType=0 controllerNumber=1 scan=24288	55.2397
35794:2	1	P.GYIN[+0.984]FSYEVLTPLK.W		N[+1]	822.93	2	1644.85	1644.85	0	0.9	27	NRagged	307.65	307.65	307.65	6.29	1125	>sp|P02817|AMELX_BOVIN Amelogenin, X isoform OS=Bos taurus OX=9913 GN=AMELX PE=1 SV=2	1	hf1_eb_18273_82_20032023.ScanId;v=1;d1=28839.28839.2	controllerType=0 controllerNumber=1 scan=28839	63.6741
33481:2	1	P.GYINFS[+79.966]YEVLTPLK.W		S[+80]	862.424	2	1723.84	1723.83	0	3.5	27	NRagged	327.46	327.46	275.13	5.76	1125	>sp|P02817|AMELX_BOVIN Amelogenin, X isoform OS=Bos taurus OX=9913 GN=AMELX PE=1 SV=2	1	hf1_eb_18273_82_20032023.ScanId;v=1;d1=27232.27232.2	controllerType=0 controllerNumber=1 scan=27232	60.6481
35102:2	1	P.GYINFS[+79.966]YEVLTPLK.W		S[+80]	862.416	2	1723.83	1723.83	0	-5.3	27	NRagged	396.4	396.4	396.4	6.53	1125	>sp|P02817|AMELX_BOVIN Amelogenin, X isoform OS=Bos taurus OX=9913 GN=AMELX PE=1 SV=2	1	hf1_eb_18273_82_20032023.ScanId;v=1;d1=28357.28357.2	controllerType=0 controllerNumber=1 scan=28357	62.7548
35604:2	1	P.GYINFS[+79.966]YEVLTPLK.W		S[+80]	862.422	2	1723.84	1723.83	0	1.3	27	NRagged	414.7	414.7	280.59	7.71	1125	>sp|P02817|AMELX_BOVIN Amelogenin, X isoform OS=Bos taurus OX=9913 GN=AMELX PE=1 SV=2	1	hf1_eb_18273_82_20032023.ScanId;v=1;d1=28713.28713.2	controllerType=0 controllerNumber=1 scan=28713	63.4426
29571:3	1	P.GYIN[+0.984]FSYEVLTPLK.W		N[+1]	548.955	3	1644.85	1644.85	0	-1.6	27	NRagged	432.88	432.88	432.88	6.91	1125	>sp|P02817|AMELX_BOVIN Amelogenin, X isoform OS=Bos taurus OX=9913 GN=AMELX PE=1 SV=2	1	hf1_eb_18273_82_20032023.ScanId;v=1;d1=24480.24480.3	controllerType=0 controllerNumber=1 scan=24480	55.5959
33279:2	1	P.GYIN[+0.984]FSYEVLTPLK.W		N[+1]	822.932	2	1644.86	1644.85	0	2.9	27	NRagged	436.49	436.49	436.49	6.58	1125	>sp|P02817|AMELX_BOVIN Amelogenin, X isoform OS=Bos taurus OX=9913 GN=AMELX PE=1 SV=2	1	hf1_eb_18273_82_20032023.ScanId;v=1;d1=27087.27087.2	controllerType=0 controllerNumber=1 scan=27087	60.3789
32414:2	1	P.GYIN[+0.984]FSYEVLTPLK.W		N[+1]	822.929	2	1644.85	1644.85	0	-0.7	27	NRagged	500.75	500.75	500.75	7.76	1125	>sp|P02817|AMELX_BOVIN Amelogenin, X isoform OS=Bos taurus OX=9913 GN=AMELX PE=1 SV=2	1	hf1_eb_18273_82_20032023.ScanId;v=1;d1=26502.26502.2	controllerType=0 controllerNumber=1 scan=26502	59.2813
33224:2	1	P.GYIN[+0.984]FS[+79.966]YEVLTPLK.W		N[+1], S[+80]	862.914	2	1724.82	1724.82	0	1.7	27	NRagged	90.86	90.86	90.86	2.61	1125	>sp|P02817|AMELX_BOVIN Amelogenin, X isoform OS=Bos taurus OX=9913 GN=AMELX PE=1 SV=2	1	hf1_eb_18273_82_20032023.ScanId;v=1;d1=27048.27048.2	controllerType=0 controllerNumber=1 scan=27048	60.3049
32861:2	1	P.GYIN[+0.984]FS[+79.966]YEVLTPLK.W		N[+1], S[+80]	862.913	2	1724.82	1724.82	0	0.4	27	NRagged	207.48	207.48	192.06	4.52	1125	>sp|P02817|AMELX_BOVIN Amelogenin, X isoform OS=Bos taurus OX=9913 GN=AMELX PE=1 SV=2	1	hf1_eb_18273_82_20032023.ScanId;v=1;d1=26805.26805.2	controllerType=0 controllerNumber=1 scan=26805	59.8527
35605:2	1	P.GYIN[+0.984]FS[+79.966]YEVLTPLK.W		N[+1], S[+80]	862.913	2	1724.82	1724.82	0	0.6	27	NRagged	393.8	393.8	308.99	7.73	1125	>sp|P02817|AMELX_BOVIN Amelogenin, X isoform OS=Bos taurus OX=9913 GN=AMELX PE=1 SV=2	1	hf1_eb_18273_82_20032023.ScanId;v=1;d1=28713.28713.2	controllerType=0 controllerNumber=1 scan=28713	63.4426
34261:2	1	P.GYIN[+0.984]FS[+79.966]YEVLTPLK.W		N[+1], S[+80]	862.914	2	1724.82	1724.82	0	1.6	27	NRagged	399.24	399.24	244.63	7.73	1125	>sp|P02817|AMELX_BOVIN Amelogenin, X isoform OS=Bos taurus OX=9913 GN=AMELX PE=1 SV=2	1	hf1_eb_18273_82_20032023.ScanId;v=1;d1=27781.27781.2	controllerType=0 controllerNumber=1 scan=27781	61.693
35846:2	1	P.GYIN[+0.984]FS[+79.966]YEVLTPLK.W		N[+1], S[+80]	862.915	2	1724.82	1724.82	0	2.7	27	NRagged	425.65	425.65	329.59	6.58	1125	>sp|P02817|AMELX_BOVIN Amelogenin, X isoform OS=Bos taurus OX=9913 GN=AMELX PE=1 SV=2	1	hf1_eb_18273_82_20032023.ScanId;v=1;d1=28873.28873.2	controllerType=0 controllerNumber=1 scan=28873	63.7335
36017:2	1	P.GYIN[+0.984]FS[+79.966]YEVLTPLK.W		N[+1], S[+80]	862.909	2	1724.81	1724.82	0	-4	27	NRagged	427.75	386.85	349.23	6.1	1125	>sp|P02817|AMELX_BOVIN Amelogenin, X isoform OS=Bos taurus OX=9913 GN=AMELX PE=1 SV=2	1	hf1_eb_18273_82_20032023.ScanId;v=1;d1=28990.28990.2	controllerType=0 controllerNumber=1 scan=28990	63.9355
35103:2	1	P.GYIN[+0.984]FS[+79.966]YEVLTPLK.W		N[+1], S[+80]	862.915	2	1724.82	1724.82	0	2.3	27	NRagged	487.53	439.03	413.69	6.62	1125	>sp|P02817|AMELX_BOVIN Amelogenin, X isoform OS=Bos taurus OX=9913 GN=AMELX PE=1 SV=2	1	hf1_eb_18273_82_20032023.ScanId;v=1;d1=28357.28357.2	controllerType=0 controllerNumber=1 scan=28357	62.7548
35359:2	1	P.GYIN[+0.984]FS[+79.966]YEVLTPLK.W		N[+1], S[+80]	862.914	2	1724.82	1724.82	0	1.3	27	NRagged	557.41	537.74	444.27	7.83	1125	>sp|P02817|AMELX_BOVIN Amelogenin, X isoform OS=Bos taurus OX=9913 GN=AMELX PE=1 SV=2	1	hf1_eb_18273_82_20032023.ScanId;v=1;d1=28540.28540.2	controllerType=0 controllerNumber=1 scan=28540	63.1054
34673:2	1	P.GYIN[+0.984]FS[+79.966]YEVLTPLK.W		N[+1], S[+80]	862.913	2	1724.82	1724.82	0	0	27	NRagged	601.98	547.47	501.46	9.3	1125	>sp|P02817|AMELX_BOVIN Amelogenin, X isoform OS=Bos taurus OX=9913 GN=AMELX PE=1 SV=2	1	hf1_eb_18273_82_20032023.ScanId;v=1;d1=28061.28061.2	controllerType=0 controllerNumber=1 scan=28061	62.2117
30246:2	1	P.GYIN[+0.984]F[+15.995]S[+79.966]YEVLTPLK.W		F[+16], N[+1], S[+80]	870.908	2	1740.81	1740.81	0	-2.4	27	NRagged	34.21	34.21	0	1.1	1125	>sp|P02817|AMELX_BOVIN Amelogenin, X isoform OS=Bos taurus OX=9913 GN=AMELX PE=1 SV=2	1	hf1_eb_18273_82_20032023.ScanId;v=1;d1=24957.24957.2	controllerType=0 controllerNumber=1 scan=24957	56.4494
23454:2	1	P.GYIN[+0.984]F[+15.995]S[+79.966]YEVLTPLK.W		F[+16], N[+1], S[+80]	870.906	2	1740.8	1740.81	0	-5.3	27	NRagged	139.62	134.44	0	2.1	1125	>sp|P02817|AMELX_BOVIN Amelogenin, X isoform OS=Bos taurus OX=9913 GN=AMELX PE=1 SV=2	1	hf1_eb_18273_82_20032023.ScanId;v=1;d1=20185.20185.2	controllerType=0 controllerNumber=1 scan=20185	47.8263
32376:2	1	P.GY[+15.995]IN[+0.984]FS[+79.966]YEVLTPLK.W		N[+1], S[+80], Y[+16]	870.909	2	1740.81	1740.81	0	-1.3	27	NRagged	157.54	157.54	68.23	3.22	1125	>sp|P02817|AMELX_BOVIN Amelogenin, X isoform OS=Bos taurus OX=9913 GN=AMELX PE=1 SV=2	1	hf1_eb_18273_82_20032023.ScanId;v=1;d1=26474.26474.2	controllerType=0 controllerNumber=1 scan=26474	59.2304
35004:1	1	G.YIN[+0.984]F.S		N[+1]	557.26	1	557.26	557.261	0	-0.9	28	Non	172.83	165.38	165.38	0.58	1125	>sp|P02817|AMELX_BOVIN Amelogenin, X isoform OS=Bos taurus OX=9913 GN=AMELX PE=1 SV=2	1	hf1_eb_18273_82_20032023.ScanId;v=1;d1=28288.28288.2	controllerType=0 controllerNumber=1 scan=28288	62.627
29821:1	1	G.YIN[+0.984]F.S		N[+1]	557.261	1	557.261	557.261	0	1.3	28	Non	174.57	174.57	174.57	0.59	1125	>sp|P02817|AMELX_BOVIN Amelogenin, X isoform OS=Bos taurus OX=9913 GN=AMELX PE=1 SV=2	1	hf1_eb_18273_82_20032023.ScanId;v=1;d1=24655.24655.2	controllerType=0 controllerNumber=1 scan=24655	55.9059
23618:1	1	G.YIN[+0.984]F.S		N[+1]	557.26	1	557.26	557.261	0	-0.9	28	Non	188.47	188.47	188.47	0.59	1125	>sp|P02817|AMELX_BOVIN Amelogenin, X isoform OS=Bos taurus OX=9913 GN=AMELX PE=1 SV=2	1	hf1_eb_18273_82_20032023.ScanId;v=1;d1=20306.20306.3	controllerType=0 controllerNumber=1 scan=20306	48.0474
20769:1	1	G.YIN[+0.984]F.S		N[+1]	557.26	1	557.26	557.261	0	-0.8	28	Non	201.24	201.24	201.24	0.66	1125	>sp|P02817|AMELX_BOVIN Amelogenin, X isoform OS=Bos taurus OX=9913 GN=AMELX PE=1 SV=2	1	hf1_eb_18273_82_20032023.ScanId;v=1;d1=18262.18262.3	controllerType=0 controllerNumber=1 scan=18262	44.3329
19130:1	1	G.YIN[+0.984]F.S		N[+1]	557.261	1	557.261	557.261	0	0.4	28	Non	202.85	202.85	202.85	0.66	1125	>sp|P02817|AMELX_BOVIN Amelogenin, X isoform OS=Bos taurus OX=9913 GN=AMELX PE=1 SV=2	1	hf1_eb_18273_82_20032023.ScanId;v=1;d1=17011.17011.2	controllerType=0 controllerNumber=1 scan=17011	42.0097
35347:1	1	G.YIN[+0.984]F.S		N[+1]	557.261	1	557.261	557.261	0	0.4	28	Non	206.29	206.29	206.29	0.66	1125	>sp|P02817|AMELX_BOVIN Amelogenin, X isoform OS=Bos taurus OX=9913 GN=AMELX PE=1 SV=2	1	hf1_eb_18273_82_20032023.ScanId;v=1;d1=28531.28531.2	controllerType=0 controllerNumber=1 scan=28531	63.0857
32738:1	1	G.YIN[+0.984]F.S		N[+1]	557.261	1	557.261	557.261	0	0.8	28	Non	211.15	199.59	199.59	0.59	1125	>sp|P02817|AMELX_BOVIN Amelogenin, X isoform OS=Bos taurus OX=9913 GN=AMELX PE=1 SV=2	1	hf1_eb_18273_82_20032023.ScanId;v=1;d1=26723.26723.2	controllerType=0 controllerNumber=1 scan=26723	59.6896
36724:1	1	G.YIN[+0.984]F.S		N[+1]	557.26	1	557.26	557.261	0	-1.7	28	Non	215.1	215.1	215.1	0.66	1125	>sp|P02817|AMELX_BOVIN Amelogenin, X isoform OS=Bos taurus OX=9913 GN=AMELX PE=1 SV=2	1	hf1_eb_18273_82_20032023.ScanId;v=1;d1=29505.29505.2	controllerType=0 controllerNumber=1 scan=29505	64.8492
18843:1	1	G.YIN[+0.984]F.S		N[+1]	557.26	1	557.26	557.261	0	-0.3	28	Non	216.72	185.66	185.66	0.59	1125	>sp|P02817|AMELX_BOVIN Amelogenin, X isoform OS=Bos taurus OX=9913 GN=AMELX PE=1 SV=2	1	hf1_eb_18273_82_20032023.ScanId;v=1;d1=16814.16814.2	controllerType=0 controllerNumber=1 scan=16814	41.6581
34175:1	1	G.YIN[+0.984]F.S		N[+1]	557.261	1	557.261	557.261	0	0.7	28	Non	253.18	250.15	250.15	2.11	1125	>sp|P02817|AMELX_BOVIN Amelogenin, X isoform OS=Bos taurus OX=9913 GN=AMELX PE=1 SV=2	1	hf1_eb_18273_82_20032023.ScanId;v=1;d1=27721.27721.2	controllerType=0 controllerNumber=1 scan=27721	61.5779
35624:1	1	G.YIN[+0.984]F.S		N[+1]	557.261	1	557.261	557.261	0	0.4	28	Non	279.38	256.42	256.42	2.11	1125	>sp|P02817|AMELX_BOVIN Amelogenin, X isoform OS=Bos taurus OX=9913 GN=AMELX PE=1 SV=2	1	hf1_eb_18273_82_20032023.ScanId;v=1;d1=28727.28727.2	controllerType=0 controllerNumber=1 scan=28727	63.4697
16588:1	1	G.YIN[+0.984]FS.Y		N[+1]	644.291	1	644.291	644.293	0	-1.9	28	Non	207.92	97.52	97.52	0.24	1125	>sp|P02817|AMELX_BOVIN Amelogenin, X isoform OS=Bos taurus OX=9913 GN=AMELX PE=1 SV=2	1	hf1_eb_18273_82_20032023.ScanId;v=1;d1=15136.15136.2	controllerType=0 controllerNumber=1 scan=15136	38.6776
16638:1	1	G.YIN[+0.984]FS.Y		N[+1]	644.292	1	644.292	644.293	0	-1	28	Non	245.14	131.65	131.65	1.39	1125	>sp|P02817|AMELX_BOVIN Amelogenin, X isoform OS=Bos taurus OX=9913 GN=AMELX PE=1 SV=2	1	hf1_eb_18273_82_20032023.ScanId;v=1;d1=15173.15173.2	controllerType=0 controllerNumber=1 scan=15173	38.7378
14960:1	1	G.YIN[+0.984]FS.Y		N[+1]	644.291	1	644.291	644.293	0	-2.1	28	Non	258.36	137.35	137.35	1.13	1125	>sp|P02817|AMELX_BOVIN Amelogenin, X isoform OS=Bos taurus OX=9913 GN=AMELX PE=1 SV=2	1	hf1_eb_18273_82_20032023.ScanId;v=1;d1=13973.13973.2	controllerType=0 controllerNumber=1 scan=13973	36.5939
19219:1	1	G.YIN[+0.984]FS[+79.966].Y		N[+1], S[+80]	724.259	1	724.259	724.259	0	-0.3	28	Non	146.27	115.08	115.08	1.24	1125	>sp|P02817|AMELX_BOVIN Amelogenin, X isoform OS=Bos taurus OX=9913 GN=AMELX PE=1 SV=2	1	hf1_eb_18273_82_20032023.ScanId;v=1;d1=17076.17076.2	controllerType=0 controllerNumber=1 scan=17076	42.1261
26522:1	1	G.YIN[+0.984]FS[+79.966].Y		N[+1], S[+80]	724.26	1	724.26	724.259	0	1.1	28	Non	154.65	49.26	49.26	0.64	1125	>sp|P02817|AMELX_BOVIN Amelogenin, X isoform OS=Bos taurus OX=9913 GN=AMELX PE=1 SV=2	1	hf1_eb_18273_82_20032023.ScanId;v=1;d1=22392.22392.2	controllerType=0 controllerNumber=1 scan=22392	51.8482
18352:1	1	G.YIN[+0.984]FS[+79.966].Y		N[+1], S[+80]	724.258	1	724.258	724.259	0	-1.8	28	Non	156.64	122.34	122.34	1.38	1125	>sp|P02817|AMELX_BOVIN Amelogenin, X isoform OS=Bos taurus OX=9913 GN=AMELX PE=1 SV=2	1	hf1_eb_18273_82_20032023.ScanId;v=1;d1=16450.16450.2	controllerType=0 controllerNumber=1 scan=16450	41.009
18604:1	1	G.YIN[+0.984]FS[+79.966].Y		N[+1], S[+80]	724.258	1	724.258	724.259	0	-0.8	28	Non	215.99	118.79	118.79	1.67	1125	>sp|P02817|AMELX_BOVIN Amelogenin, X isoform OS=Bos taurus OX=9913 GN=AMELX PE=1 SV=2	1	hf1_eb_18273_82_20032023.ScanId;v=1;d1=16646.16646.2	controllerType=0 controllerNumber=1 scan=16646	41.3663
20379:1	1	G.YIN[+0.984]FS[+79.966].Y		N[+1], S[+80]	724.259	1	724.259	724.259	0	-0.4	28	Non	275.52	107.97	107.97	2.85	1125	>sp|P02817|AMELX_BOVIN Amelogenin, X isoform OS=Bos taurus OX=9913 GN=AMELX PE=1 SV=2	1	hf1_eb_18273_82_20032023.ScanId;v=1;d1=17972.17972.2	controllerType=0 controllerNumber=1 scan=17972	43.7898
23943:1	1	G.YIN[+0.984]FSY.E		N[+1]	807.356	1	807.356	807.356	0	-0.2	28	Non	128.78	128.78	128.78	1.4	1125	>sp|P02817|AMELX_BOVIN Amelogenin, X isoform OS=Bos taurus OX=9913 GN=AMELX PE=1 SV=2	1	hf1_eb_18273_82_20032023.ScanId;v=1;d1=20532.20532.2	controllerType=0 controllerNumber=1 scan=20532	48.4517
22864:1	1	G.YIN[+0.984]FSY.E		N[+1]	807.356	1	807.356	807.356	0	0.6	28	Non	198.93	131.16	131.16	1.39	1125	>sp|P02817|AMELX_BOVIN Amelogenin, X isoform OS=Bos taurus OX=9913 GN=AMELX PE=1 SV=2	1	hf1_eb_18273_82_20032023.ScanId;v=1;d1=19773.19773.2	controllerType=0 controllerNumber=1 scan=19773	47.0641
28109:1	1	G.YIN[+0.984]FSY.E		N[+1]	807.355	1	807.355	807.356	0	-1	28	Non	217.83	172.43	172.43	2.43	1125	>sp|P02817|AMELX_BOVIN Amelogenin, X isoform OS=Bos taurus OX=9913 GN=AMELX PE=1 SV=2	1	hf1_eb_18273_82_20032023.ScanId;v=1;d1=23463.23463.2	controllerType=0 controllerNumber=1 scan=23463	53.7689
26693:1	1	G.YIN[+0.984]FS[+79.966]Y.E		N[+1], S[+80]	887.323	1	887.323	887.322	0	1	28	Non	96.15	96.15	96.15	0.67	1125	>sp|P02817|AMELX_BOVIN Amelogenin, X isoform OS=Bos taurus OX=9913 GN=AMELX PE=1 SV=2	1	hf1_eb_18273_82_20032023.ScanId;v=1;d1=22504.22504.3	controllerType=0 controllerNumber=1 scan=22504	52.0498
35095:2	1	G.YINFS[+79.966]YEVL.T		S[+80]	614.27	2	1227.53	1227.53	0	-0.9	28	Non	137.42	137.42	137.42	1.12	1125	>sp|P02817|AMELX_BOVIN Amelogenin, X isoform OS=Bos taurus OX=9913 GN=AMELX PE=1 SV=2	1	hf1_eb_18273_82_20032023.ScanId;v=1;d1=28351.28351.2	controllerType=0 controllerNumber=1 scan=28351	62.7458
33509:2	1	G.YIN[+0.984]FSYEVL.T		N[+1]	574.779	2	1148.55	1148.55	0	0.5	28	Non	161.68	95.52	95.52	1	1125	>sp|P02817|AMELX_BOVIN Amelogenin, X isoform OS=Bos taurus OX=9913 GN=AMELX PE=1 SV=2	1	hf1_eb_18273_82_20032023.ScanId;v=1;d1=27252.27252.2	controllerType=0 controllerNumber=1 scan=27252	60.6872
33780:2	1	G.YIN[+0.984]FSYEVL.T		N[+1]	574.779	2	1148.55	1148.55	0	0.6	28	Non	330.14	330.14	330.14	4.41	1125	>sp|P02817|AMELX_BOVIN Amelogenin, X isoform OS=Bos taurus OX=9913 GN=AMELX PE=1 SV=2	1	hf1_eb_18273_82_20032023.ScanId;v=1;d1=27443.27443.2	controllerType=0 controllerNumber=1 scan=27443	61.0443
34192:2	1	G.YIN[+0.984]FS[+79.966]YEVL.T		N[+1], S[+80]	614.763	2	1228.52	1228.52	0	1.1	28	Non	144.04	144.04	144.04	0.62	1125	>sp|P02817|AMELX_BOVIN Amelogenin, X isoform OS=Bos taurus OX=9913 GN=AMELX PE=1 SV=2	1	hf1_eb_18273_82_20032023.ScanId;v=1;d1=27732.27732.2	controllerType=0 controllerNumber=1 scan=27732	61.6007
35884:2	1	G.YIN[+0.984]FS[+79.966]YEVL.T		N[+1], S[+80]	614.762	2	1228.52	1228.52	0	-0.3	28	Non	220.48	220.48	220.48	2.37	1125	>sp|P02817|AMELX_BOVIN Amelogenin, X isoform OS=Bos taurus OX=9913 GN=AMELX PE=1 SV=2	1	hf1_eb_18273_82_20032023.ScanId;v=1;d1=28901.28901.2	controllerType=0 controllerNumber=1 scan=28901	63.7826
31440:2	1	G.YIN[+0.984]FSYEVLT.P		N[+1]	625.303	2	1249.6	1249.6	0	-0.7	28	Non	90.22	90.22	90.22	0.63	1125	>sp|P02817|AMELX_BOVIN Amelogenin, X isoform OS=Bos taurus OX=9913 GN=AMELX PE=1 SV=2	1	hf1_eb_18273_82_20032023.ScanId;v=1;d1=25803.25803.2	controllerType=0 controllerNumber=1 scan=25803	57.9842
32021:2	1	G.YIN[+0.984]FSYEVLT.P		N[+1]	625.303	2	1249.6	1249.6	0	-0.3	28	Non	176.86	168.21	168.21	2.14	1125	>sp|P02817|AMELX_BOVIN Amelogenin, X isoform OS=Bos taurus OX=9913 GN=AMELX PE=1 SV=2	1	hf1_eb_18273_82_20032023.ScanId;v=1;d1=26219.26219.2	controllerType=0 controllerNumber=1 scan=26219	58.7486
34151:2	1	G.YIN[+0.984]FS[+79.966]YEVLT.P		N[+1], S[+80]	665.286	2	1329.56	1329.57	0	-0.4	28	Non	62.45	62.45	62.45	0.39	1125	>sp|P02817|AMELX_BOVIN Amelogenin, X isoform OS=Bos taurus OX=9913 GN=AMELX PE=1 SV=2	1	hf1_eb_18273_82_20032023.ScanId;v=1;d1=27706.27706.2	controllerType=0 controllerNumber=1 scan=27706	61.5493
33909:2	1	G.YIN[+0.984]FS[+79.966]YEVLT.P		N[+1], S[+80]	665.286	2	1329.57	1329.57	0	0.2	28	Non	144.39	144.39	144.39	1.31	1125	>sp|P02817|AMELX_BOVIN Amelogenin, X isoform OS=Bos taurus OX=9913 GN=AMELX PE=1 SV=2	1	hf1_eb_18273_82_20032023.ScanId;v=1;d1=27529.27529.2	controllerType=0 controllerNumber=1 scan=27529	61.2037
32910:2	1	G.YIN[+0.984]FSYEVLTP.L		N[+1]	673.83	2	1346.65	1346.65	0	0.5	28	Non	54.24	54.24	54.24	0.36	1125	>sp|P02817|AMELX_BOVIN Amelogenin, X isoform OS=Bos taurus OX=9913 GN=AMELX PE=1 SV=2	1	hf1_eb_18273_82_20032023.ScanId;v=1;d1=26836.26836.2	controllerType=0 controllerNumber=1 scan=26836	59.9112
34780:2	1	G.YINFS[+79.966]YEVLTP.L		S[+80]	713.32	2	1425.63	1425.63	0	-0.8	28	Non	72.63	72.63	72.63	0.39	1125	>sp|P02817|AMELX_BOVIN Amelogenin, X isoform OS=Bos taurus OX=9913 GN=AMELX PE=1 SV=2	1	hf1_eb_18273_82_20032023.ScanId;v=1;d1=28136.28136.2	controllerType=0 controllerNumber=1 scan=28136	62.3507
33382:2	1	G.YIN[+0.984]FSYEVLTP.L		N[+1]	673.829	2	1346.65	1346.65	0	-0.8	28	Non	86.9	86.9	86.9	0.63	1125	>sp|P02817|AMELX_BOVIN Amelogenin, X isoform OS=Bos taurus OX=9913 GN=AMELX PE=1 SV=2	1	hf1_eb_18273_82_20032023.ScanId;v=1;d1=27158.27158.2	controllerType=0 controllerNumber=1 scan=27158	60.5066
34502:2	1	G.YINFS[+79.966]YEVLTP.L		S[+80]	713.32	2	1425.63	1425.63	0	-0.2	28	Non	257.78	257.78	223.59	3.76	1125	>sp|P02817|AMELX_BOVIN Amelogenin, X isoform OS=Bos taurus OX=9913 GN=AMELX PE=1 SV=2	1	hf1_eb_18273_82_20032023.ScanId;v=1;d1=27948.27948.2	controllerType=0 controllerNumber=1 scan=27948	62.0035
33800:2	1	G.YIN[+0.984]FSYEVLTP.L		N[+1]	673.83	2	1346.65	1346.65	0	0.1	28	Non	258.07	258.07	258.07	4.3	1125	>sp|P02817|AMELX_BOVIN Amelogenin, X isoform OS=Bos taurus OX=9913 GN=AMELX PE=1 SV=2	1	hf1_eb_18273_82_20032023.ScanId;v=1;d1=27457.27457.2	controllerType=0 controllerNumber=1 scan=27457	61.0683
33762:2	1	G.YIN[+0.984]FSYEVLTP.L		N[+1]	673.829	2	1346.65	1346.65	0	-0.2	28	Non	275.04	269.41	269.41	4.31	1125	>sp|P02817|AMELX_BOVIN Amelogenin, X isoform OS=Bos taurus OX=9913 GN=AMELX PE=1 SV=2	1	hf1_eb_18273_82_20032023.ScanId;v=1;d1=27432.27432.2	controllerType=0 controllerNumber=1 scan=27432	61.0247
35055:2	1	G.YIN[+0.984]FS[+79.966]YEVLTP.L		N[+1], S[+80]	713.812	2	1426.62	1426.62	0	-1.2	28	Non	56.89	56.89	56.89	0.39	1125	>sp|P02817|AMELX_BOVIN Amelogenin, X isoform OS=Bos taurus OX=9913 GN=AMELX PE=1 SV=2	1	hf1_eb_18273_82_20032023.ScanId;v=1;d1=28323.28323.2	controllerType=0 controllerNumber=1 scan=28323	62.6938
35891:2	1	G.YIN[+0.984]FS[+79.966]YEVLTP.L		N[+1], S[+80]	713.812	2	1426.62	1426.62	0	0	28	Non	88.07	88.07	88.07	0.63	1125	>sp|P02817|AMELX_BOVIN Amelogenin, X isoform OS=Bos taurus OX=9913 GN=AMELX PE=1 SV=2	1	hf1_eb_18273_82_20032023.ScanId;v=1;d1=28906.28906.2	controllerType=0 controllerNumber=1 scan=28906	63.7901
35839:2	1	G.YIN[+0.984]FS[+79.966]YEVLTP.L		N[+1], S[+80]	713.812	2	1426.62	1426.62	0	-0.5	28	Non	177.92	177.92	177.92	2.14	1125	>sp|P02817|AMELX_BOVIN Amelogenin, X isoform OS=Bos taurus OX=9913 GN=AMELX PE=1 SV=2	1	hf1_eb_18273_82_20032023.ScanId;v=1;d1=28870.28870.2	controllerType=0 controllerNumber=1 scan=28870	63.729
33990:2	1	G.YIN[+0.984]FS[+79.966]YEVLTP.L		N[+1], S[+80]	713.813	2	1426.62	1426.62	0	0	28	Non	185.68	185.68	149.89	2.76	1125	>sp|P02817|AMELX_BOVIN Amelogenin, X isoform OS=Bos taurus OX=9913 GN=AMELX PE=1 SV=2	1	hf1_eb_18273_82_20032023.ScanId;v=1;d1=27585.27585.2	controllerType=0 controllerNumber=1 scan=27585	61.307
35558:2	1	G.YIN[+0.984]FS[+79.966]YEVLTP.L		N[+1], S[+80]	713.813	2	1426.62	1426.62	0	0.4	28	Non	240.34	240.34	240.34	4.14	1125	>sp|P02817|AMELX_BOVIN Amelogenin, X isoform OS=Bos taurus OX=9913 GN=AMELX PE=1 SV=2	1	hf1_eb_18273_82_20032023.ScanId;v=1;d1=28682.28682.2	controllerType=0 controllerNumber=1 scan=28682	63.3838
34498:2	1	G.YINFSYEVLTPL.K			729.879	2	1458.75	1458.75	0	-0.2	28	Non	228.23	228.23	228.23	2.98	1125	>sp|P02817|AMELX_BOVIN Amelogenin, X isoform OS=Bos taurus OX=9913 GN=AMELX PE=1 SV=2	1	hf1_eb_18273_82_20032023.ScanId;v=1;d1=27944.27944.2	controllerType=0 controllerNumber=1 scan=27944	61.9944
35418:2	1	G.YIN[+0.984]FSYEVLTPL.K		N[+1]	730.371	2	1459.74	1459.74	0	0.1	28	Non	194.97	194.97	194.97	2.35	1125	>sp|P02817|AMELX_BOVIN Amelogenin, X isoform OS=Bos taurus OX=9913 GN=AMELX PE=1 SV=2	1	hf1_eb_18273_82_20032023.ScanId;v=1;d1=28581.28581.2	controllerType=0 controllerNumber=1 scan=28581	63.1822
36349:2	1	G.YINFS[+79.966]YEVLTPL.K		S[+80]	769.862	2	1538.72	1538.72	0	-0.6	28	Non	281.65	268.57	268.57	4.35	1125	>sp|P02817|AMELX_BOVIN Amelogenin, X isoform OS=Bos taurus OX=9913 GN=AMELX PE=1 SV=2	1	hf1_eb_18273_82_20032023.ScanId;v=1;d1=29232.29232.2	controllerType=0 controllerNumber=1 scan=29232	64.3421
36160:2	1	G.YIN[+0.984]FSYEVLTPL.K		N[+1]	730.371	2	1459.73	1459.74	0	-1.1	28	Non	459.33	358.78	358.78	4.69	1125	>sp|P02817|AMELX_BOVIN Amelogenin, X isoform OS=Bos taurus OX=9913 GN=AMELX PE=1 SV=2	1	hf1_eb_18273_82_20032023.ScanId;v=1;d1=29093.29093.2	controllerType=0 controllerNumber=1 scan=29093	64.108
36826:2	1	G.YIN[+0.984]FS[+79.966]YEVLTPL.K		N[+1], S[+80]	770.355	2	1539.7	1539.7	0	0	28	Non	21.96	21.96	21.96	0.64	1125	>sp|P02817|AMELX_BOVIN Amelogenin, X isoform OS=Bos taurus OX=9913 GN=AMELX PE=1 SV=2	1	hf1_eb_18273_82_20032023.ScanId;v=1;d1=29593.29593.2	controllerType=0 controllerNumber=1 scan=29593	65.037
36632:2	1	G.YIN[+0.984]FS[+79.966]YEVLTPL.K		N[+1], S[+80]	770.354	2	1539.7	1539.7	0	-0.3	28	Non	256.41	254.2	254.2	4.19	1125	>sp|P02817|AMELX_BOVIN Amelogenin, X isoform OS=Bos taurus OX=9913 GN=AMELX PE=1 SV=2	1	hf1_eb_18273_82_20032023.ScanId;v=1;d1=29430.29430.2	controllerType=0 controllerNumber=1 scan=29430	64.6966
36310:2	1	G.YIN[+0.984]FS[+79.966]YEVLTPL.K		N[+1], S[+80]	770.354	2	1539.7	1539.7	0	-0.3	28	Non	375.89	292.17	218.11	4.58	1125	>sp|P02817|AMELX_BOVIN Amelogenin, X isoform OS=Bos taurus OX=9913 GN=AMELX PE=1 SV=2	1	hf1_eb_18273_82_20032023.ScanId;v=1;d1=29202.29202.2	controllerType=0 controllerNumber=1 scan=29202	64.2906
27601:2	1	G.YINFSYEVLTPLK.W			793.928	2	1586.85	1586.85	0	1.9	28	NRagged	132.52	132.52	132.52	2.28	1125	>sp|P02817|AMELX_BOVIN Amelogenin, X isoform OS=Bos taurus OX=9913 GN=AMELX PE=1 SV=2	1	hf1_eb_18273_82_20032023.ScanId;v=1;d1=23121.23121.2	controllerType=0 controllerNumber=1 scan=23121	53.1627
30605:2	1	G.YINFSYEVLTPLK.W			793.924	2	1586.84	1586.85	0	-3.2	28	NRagged	177.86	177.86	177.86	3.5	1125	>sp|P02817|AMELX_BOVIN Amelogenin, X isoform OS=Bos taurus OX=9913 GN=AMELX PE=1 SV=2	1	hf1_eb_18273_82_20032023.ScanId;v=1;d1=25233.25233.2	controllerType=0 controllerNumber=1 scan=25233	56.9646
27316:2	1	G.YINFSYEVLTPLK.W			793.927	2	1586.85	1586.85	0	-0.5	28	NRagged	334.15	330.15	330.15	6.26	1125	>sp|P02817|AMELX_BOVIN Amelogenin, X isoform OS=Bos taurus OX=9913 GN=AMELX PE=1 SV=2	1	hf1_eb_18273_82_20032023.ScanId;v=1;d1=22919.22919.2	controllerType=0 controllerNumber=1 scan=22919	52.7917
31333:2	1	G.YINFSYEVLTPLK.W			793.927	2	1586.85	1586.85	0	-0.2	28	NRagged	438.82	438.82	438.82	7.72	1125	>sp|P02817|AMELX_BOVIN Amelogenin, X isoform OS=Bos taurus OX=9913 GN=AMELX PE=1 SV=2	1	hf1_eb_18273_82_20032023.ScanId;v=1;d1=25727.25727.2	controllerType=0 controllerNumber=1 scan=25727	57.8516
27578:3	1	G.YINFSYEVLTPLK.W			529.62	3	1586.85	1586.85	0	-0.5	28	NRagged	458.26	389.76	389.76	7.35	1125	>sp|P02817|AMELX_BOVIN Amelogenin, X isoform OS=Bos taurus OX=9913 GN=AMELX PE=1 SV=2	1	hf1_eb_18273_82_20032023.ScanId;v=1;d1=23106.23106.3	controllerType=0 controllerNumber=1 scan=23106	53.1374
27312:3	1	G.YINFSYEVLTPLK.W			529.621	3	1586.85	1586.85	0	0.5	28	NRagged	481.88	363.18	363.18	7.35	1125	>sp|P02817|AMELX_BOVIN Amelogenin, X isoform OS=Bos taurus OX=9913 GN=AMELX PE=1 SV=2	1	hf1_eb_18273_82_20032023.ScanId;v=1;d1=22917.22917.3	controllerType=0 controllerNumber=1 scan=22917	52.7887
34568:2	1	G.YIN[+0.984]FSYEVLTPLK.W		N[+1]	794.42	2	1587.83	1587.83	0	0.9	28	NRagged	34.39	34.39	34.39	1.35	1125	>sp|P02817|AMELX_BOVIN Amelogenin, X isoform OS=Bos taurus OX=9913 GN=AMELX PE=1 SV=2	1	hf1_eb_18273_82_20032023.ScanId;v=1;d1=27989.27989.2	controllerType=0 controllerNumber=1 scan=27989	62.0741
33364:2	1	G.YIN[+0.984]FSYEVLTPLK.W		N[+1]	794.42	2	1587.83	1587.83	0	1	28	NRagged	68.25	68.25	68.25	1.97	1125	>sp|P02817|AMELX_BOVIN Amelogenin, X isoform OS=Bos taurus OX=9913 GN=AMELX PE=1 SV=2	1	hf1_eb_18273_82_20032023.ScanId;v=1;d1=27145.27145.2	controllerType=0 controllerNumber=1 scan=27145	60.4841
30797:2	1	G.YIN[+0.984]FSYEVLTPLK.W		N[+1]	794.419	2	1587.83	1587.83	0	0.5	28	NRagged	190.81	190.81	190.81	4.38	1125	>sp|P02817|AMELX_BOVIN Amelogenin, X isoform OS=Bos taurus OX=9913 GN=AMELX PE=1 SV=2	1	hf1_eb_18273_82_20032023.ScanId;v=1;d1=25369.25369.2	controllerType=0 controllerNumber=1 scan=25369	57.207
32795:2	1	G.YIN[+0.984]FSYEVLTPLK.W		N[+1]	794.421	2	1587.83	1587.83	0	2.6	28	NRagged	203.3	203.3	203.3	3.52	1125	>sp|P02817|AMELX_BOVIN Amelogenin, X isoform OS=Bos taurus OX=9913 GN=AMELX PE=1 SV=2	1	hf1_eb_18273_82_20032023.ScanId;v=1;d1=26761.26761.2	controllerType=0 controllerNumber=1 scan=26761	59.7656
32800:2	1	G.YINFS[+79.966]YEVLTPLK.W		S[+80]	833.91	2	1666.81	1666.81	0	0.5	28	NRagged	235.4	235.4	133.71	4.64	1125	>sp|P02817|AMELX_BOVIN Amelogenin, X isoform OS=Bos taurus OX=9913 GN=AMELX PE=1 SV=2	1	hf1_eb_18273_82_20032023.ScanId;v=1;d1=26763.26763.2	controllerType=0 controllerNumber=1 scan=26763	59.7686
34186:2	1	G.YIN[+0.984]FSYEVLTPLK.W		N[+1]	794.421	2	1587.83	1587.83	0	2.2	28	NRagged	283.72	283.72	283.72	5.16	1125	>sp|P02817|AMELX_BOVIN Amelogenin, X isoform OS=Bos taurus OX=9913 GN=AMELX PE=1 SV=2	1	hf1_eb_18273_82_20032023.ScanId;v=1;d1=27729.27729.2	controllerType=0 controllerNumber=1 scan=27729	61.5961
32005:2	1	G.YIN[+0.984]FSYEVLTPLK.W		N[+1]	794.419	2	1587.83	1587.83	0	0.1	28	NRagged	337.65	337.65	337.65	6.24	1125	>sp|P02817|AMELX_BOVIN Amelogenin, X isoform OS=Bos taurus OX=9913 GN=AMELX PE=1 SV=2	1	hf1_eb_18273_82_20032023.ScanId;v=1;d1=26209.26209.2	controllerType=0 controllerNumber=1 scan=26209	58.7306
32516:2	1	G.YIN[+0.984]FSYEVLTPLK.W		N[+1]	794.42	2	1587.83	1587.83	0	1.5	28	NRagged	348.68	337.76	337.76	6.48	1125	>sp|P02817|AMELX_BOVIN Amelogenin, X isoform OS=Bos taurus OX=9913 GN=AMELX PE=1 SV=2	1	hf1_eb_18273_82_20032023.ScanId;v=1;d1=26573.26573.2	controllerType=0 controllerNumber=1 scan=26573	59.4137
33958:2	1	G.YINFS[+79.966]YEVLTPLK.W		S[+80]	833.911	2	1666.81	1666.81	0	0.7	28	NRagged	351.01	351.01	303.49	6.48	1125	>sp|P02817|AMELX_BOVIN Amelogenin, X isoform OS=Bos taurus OX=9913 GN=AMELX PE=1 SV=2	1	hf1_eb_18273_82_20032023.ScanId;v=1;d1=27561.27561.2	controllerType=0 controllerNumber=1 scan=27561	61.2618
28121:3	1	G.YIN[+0.984]FSYEVLTPLK.W		N[+1]	529.948	3	1587.83	1587.83	0	-0.2	28	NRagged	405.03	405.03	405.03	6.91	1125	>sp|P02817|AMELX_BOVIN Amelogenin, X isoform OS=Bos taurus OX=9913 GN=AMELX PE=1 SV=2	1	hf1_eb_18273_82_20032023.ScanId;v=1;d1=23472.23472.3	controllerType=0 controllerNumber=1 scan=23472	53.7852
33633:2	1	G.YIN[+0.984]FSYEVLTPLK.W		N[+1]	794.42	2	1587.83	1587.83	0	1.3	28	NRagged	445.39	445.39	445.39	7.73	1125	>sp|P02817|AMELX_BOVIN Amelogenin, X isoform OS=Bos taurus OX=9913 GN=AMELX PE=1 SV=2	1	hf1_eb_18273_82_20032023.ScanId;v=1;d1=27334.27334.2	controllerType=0 controllerNumber=1 scan=27334	60.8377
33079:2	1	G.YIN[+0.984]FSYEVLTPLK.W		N[+1]	794.419	2	1587.83	1587.83	0	0.5	28	NRagged	445.99	445.99	445.99	7.73	1125	>sp|P02817|AMELX_BOVIN Amelogenin, X isoform OS=Bos taurus OX=9913 GN=AMELX PE=1 SV=2	1	hf1_eb_18273_82_20032023.ScanId;v=1;d1=26948.26948.2	controllerType=0 controllerNumber=1 scan=26948	60.116
31093:2	1	G.YIN[+0.984]FSYEVLTPLK.W		N[+1]	794.419	2	1587.83	1587.83	0	0.3	28	NRagged	470.17	459.03	459.03	7.73	1125	>sp|P02817|AMELX_BOVIN Amelogenin, X isoform OS=Bos taurus OX=9913 GN=AMELX PE=1 SV=2	1	hf1_eb_18273_82_20032023.ScanId;v=1;d1=25563.25563.2	controllerType=0 controllerNumber=1 scan=25563	57.5501
33682:2	1	G.YINFS[+79.966]YEVLTPLK.W		S[+80]	833.911	2	1666.81	1666.81	0	0.7	28	NRagged	523.89	523.89	389.52	7.83	1125	>sp|P02817|AMELX_BOVIN Amelogenin, X isoform OS=Bos taurus OX=9913 GN=AMELX PE=1 SV=2	1	hf1_eb_18273_82_20032023.ScanId;v=1;d1=27369.27369.2	controllerType=0 controllerNumber=1 scan=27369	60.9027
35522:2	1	G.YINFS[+79.966]YEVLTPLK.W		S[+80]	833.91	2	1666.81	1666.81	0	-0.1	28	NRagged	553.7	522.75	432.59	7.85	1125	>sp|P02817|AMELX_BOVIN Amelogenin, X isoform OS=Bos taurus OX=9913 GN=AMELX PE=1 SV=2	1	hf1_eb_18273_82_20032023.ScanId;v=1;d1=28657.28657.2	controllerType=0 controllerNumber=1 scan=28657	63.3341
32256:2	1	G.YIN[+0.984]FSYEVLTPLK.W		N[+1]	794.419	2	1587.83	1587.83	0	0.4	28	NRagged	566.52	534.26	534.26	8.29	1125	>sp|P02817|AMELX_BOVIN Amelogenin, X isoform OS=Bos taurus OX=9913 GN=AMELX PE=1 SV=2	1	hf1_eb_18273_82_20032023.ScanId;v=1;d1=26388.26388.2	controllerType=0 controllerNumber=1 scan=26388	59.0694
31723:2	1	G.YIN[+0.984]FSYEVLTPLK.W		N[+1]	794.419	2	1587.83	1587.83	0	-0.2	28	NRagged	584.07	459.8	459.8	8.3	1125	>sp|P02817|AMELX_BOVIN Amelogenin, X isoform OS=Bos taurus OX=9913 GN=AMELX PE=1 SV=2	1	hf1_eb_18273_82_20032023.ScanId;v=1;d1=26013.26013.2	controllerType=0 controllerNumber=1 scan=26013	58.379
33420:2	1	G.YINFS[+79.966]YEVLTPLK.W		S[+80]	833.911	2	1666.82	1666.81	0	1.5	28	NRagged	618.42	572.77	439.89	9.29	1125	>sp|P02817|AMELX_BOVIN Amelogenin, X isoform OS=Bos taurus OX=9913 GN=AMELX PE=1 SV=2	1	hf1_eb_18273_82_20032023.ScanId;v=1;d1=27188.27188.2	controllerType=0 controllerNumber=1 scan=27188	60.5638
36219:2	1	G.YIN[+0.984]FS[+79.966]YEVLTPLK.W		N[+1], S[+80]	834.402	2	1667.8	1667.8	0	-0.6	28	NRagged	32.09	32.09	32.09	0.89	1125	>sp|P02817|AMELX_BOVIN Amelogenin, X isoform OS=Bos taurus OX=9913 GN=AMELX PE=1 SV=2	1	hf1_eb_18273_82_20032023.ScanId;v=1;d1=29139.29139.2	controllerType=0 controllerNumber=1 scan=29139	64.1858
33159:2	1	G.YIN[+0.984]FS[+79.966]YEVLTPLK.W		N[+1], S[+80]	834.4	2	1667.79	1667.8	0	-2.5	28	NRagged	92.97	92.97	92.97	1.98	1125	>sp|P02817|AMELX_BOVIN Amelogenin, X isoform OS=Bos taurus OX=9913 GN=AMELX PE=1 SV=2	1	hf1_eb_18273_82_20032023.ScanId;v=1;d1=27002.27002.2	controllerType=0 controllerNumber=1 scan=27002	60.2146
34330:3	1	G.YIN[+0.984]FS[+79.966]YEVLTPLK.W		N[+1], S[+80]	556.604	3	1667.8	1667.8	0	-0.3	28	NRagged	248.26	248.26	207.54	5.63	1125	>sp|P02817|AMELX_BOVIN Amelogenin, X isoform OS=Bos taurus OX=9913 GN=AMELX PE=1 SV=2	1	hf1_eb_18273_82_20032023.ScanId;v=1;d1=27829.27829.3	controllerType=0 controllerNumber=1 scan=27829	61.7803
32533:2	1	G.YIN[+0.984]FS[+79.966]YEVLTPLK.W		N[+1], S[+80]	834.401	2	1667.8	1667.8	0	-0.9	28	NRagged	287.63	287.63	251.55	6.31	1125	>sp|P02817|AMELX_BOVIN Amelogenin, X isoform OS=Bos taurus OX=9913 GN=AMELX PE=1 SV=2	1	hf1_eb_18273_82_20032023.ScanId;v=1;d1=26584.26584.2	controllerType=0 controllerNumber=1 scan=26584	59.4332
32262:2	1	G.YIN[+0.984]FS[+79.966]YEVLTPLK.W		N[+1], S[+80]	834.402	2	1667.8	1667.8	0	0.4	28	NRagged	367.55	367.55	262.78	7.31	1125	>sp|P02817|AMELX_BOVIN Amelogenin, X isoform OS=Bos taurus OX=9913 GN=AMELX PE=1 SV=2	1	hf1_eb_18273_82_20032023.ScanId;v=1;d1=26392.26392.2	controllerType=0 controllerNumber=1 scan=26392	59.0784
35020:2	1	G.YIN[+0.984]FS[+79.966]YEVLTPLK.W		N[+1], S[+80]	834.402	2	1667.8	1667.8	0	0.1	28	NRagged	441.74	441.74	338.28	7.33	1125	>sp|P02817|AMELX_BOVIN Amelogenin, X isoform OS=Bos taurus OX=9913 GN=AMELX PE=1 SV=2	1	hf1_eb_18273_82_20032023.ScanId;v=1;d1=28300.28300.2	controllerType=0 controllerNumber=1 scan=28300	62.6511
34204:2	1	G.YIN[+0.984]FS[+79.966]YEVLTPLK.W		N[+1], S[+80]	834.404	2	1667.8	1667.8	0	2	28	NRagged	470.09	470.09	363.83	7.73	1125	>sp|P02817|AMELX_BOVIN Amelogenin, X isoform OS=Bos taurus OX=9913 GN=AMELX PE=1 SV=2	1	hf1_eb_18273_82_20032023.ScanId;v=1;d1=27741.27741.2	controllerType=0 controllerNumber=1 scan=27741	61.6173
34745:2	1	G.YIN[+0.984]FS[+79.966]YEVLTPLK.W		N[+1], S[+80]	834.402	2	1667.8	1667.8	0	-0.1	28	NRagged	504	504	420.18	7.76	1125	>sp|P02817|AMELX_BOVIN Amelogenin, X isoform OS=Bos taurus OX=9913 GN=AMELX PE=1 SV=2	1	hf1_eb_18273_82_20032023.ScanId;v=1;d1=28110.28110.2	controllerType=0 controllerNumber=1 scan=28110	62.3031
35272:2	1	G.YIN[+0.984]FS[+79.966]YEVLTPLK.W		N[+1], S[+80]	834.403	2	1667.8	1667.8	0	0.5	28	NRagged	504.87	504.87	390.36	7.33	1125	>sp|P02817|AMELX_BOVIN Amelogenin, X isoform OS=Bos taurus OX=9913 GN=AMELX PE=1 SV=2	1	hf1_eb_18273_82_20032023.ScanId;v=1;d1=28480.28480.2	controllerType=0 controllerNumber=1 scan=28480	62.9934
33683:2	1	G.YIN[+0.984]FS[+79.966]YEVLTPLK.W		N[+1], S[+80]	834.404	2	1667.8	1667.8	0	2.8	28	NRagged	506.57	506.57	403.21	6.62	1125	>sp|P02817|AMELX_BOVIN Amelogenin, X isoform OS=Bos taurus OX=9913 GN=AMELX PE=1 SV=2	1	hf1_eb_18273_82_20032023.ScanId;v=1;d1=27369.27369.2	controllerType=0 controllerNumber=1 scan=27369	60.9027
35804:2	1	G.YIN[+0.984]FS[+79.966]YEVLTPLK.W		N[+1], S[+80]	834.402	2	1667.8	1667.8	0	-0.5	28	NRagged	507.45	507.45	408.61	7.76	1125	>sp|P02817|AMELX_BOVIN Amelogenin, X isoform OS=Bos taurus OX=9913 GN=AMELX PE=1 SV=2	1	hf1_eb_18273_82_20032023.ScanId;v=1;d1=28845.28845.2	controllerType=0 controllerNumber=1 scan=28845	63.6859
33421:2	1	G.YIN[+0.984]FS[+79.966]YEVLTPLK.W		N[+1], S[+80]	834.408	2	1667.81	1667.8	0	6.7	28	NRagged	552.57	511.17	403.96	6.27	1125	>sp|P02817|AMELX_BOVIN Amelogenin, X isoform OS=Bos taurus OX=9913 GN=AMELX PE=1 SV=2	1	hf1_eb_18273_82_20032023.ScanId;v=1;d1=27188.27188.2	controllerType=0 controllerNumber=1 scan=27188	60.5638
34475:2	1	G.YIN[+0.984]FS[+79.966]YEVLTPLK.W		N[+1], S[+80]	834.403	2	1667.8	1667.8	0	0.6	28	NRagged	583.52	579.23	456.67	8.29	1125	>sp|P02817|AMELX_BOVIN Amelogenin, X isoform OS=Bos taurus OX=9913 GN=AMELX PE=1 SV=2	1	hf1_eb_18273_82_20032023.ScanId;v=1;d1=27927.27927.2	controllerType=0 controllerNumber=1 scan=27927	61.9628
33722:2	1	G.YIN[+0.984]FS[+79.966]YEVLTP[+15.995]LK.W		N[+1], P[+16], S[+80]	842.4	2	1683.79	1683.79	0	0.4	28	NRagged	123.54	123.54	1.76	3.2	1125	>sp|P02817|AMELX_BOVIN Amelogenin, X isoform OS=Bos taurus OX=9913 GN=AMELX PE=1 SV=2	1	hf1_eb_18273_82_20032023.ScanId;v=1;d1=27400.27400.3	controllerType=0 controllerNumber=1 scan=27400	60.9616
31890:2	1	G.YIN[+0.984]FS[+79.966]YEVLTP[+15.995]LK.W		N[+1], P[+16], S[+80]	842.397	2	1683.79	1683.79	0	-2.7	28	NRagged	185.68	185.68	20	4.05	1125	>sp|P02817|AMELX_BOVIN Amelogenin, X isoform OS=Bos taurus OX=9913 GN=AMELX PE=1 SV=2	1	hf1_eb_18273_82_20032023.ScanId;v=1;d1=26129.26129.2	controllerType=0 controllerNumber=1 scan=26129	58.5878
36128:2	1	G.YIN[+0.984]FSYEVLTPLKW.Y		N[+1]	887.459	2	1773.91	1773.91	0	0	28	Non	102.71	34.42	34.42	1.29	1125	>sp|P02817|AMELX_BOVIN Amelogenin, X isoform OS=Bos taurus OX=9913 GN=AMELX PE=1 SV=2	1	hf1_eb_18273_82_20032023.ScanId;v=1;d1=29067.29067.2	controllerType=0 controllerNumber=1 scan=29067	64.0671
36235:2	1	G.YINFS[+79.966]YEVLTPLKW.Y		S[+80]	926.948	2	1852.89	1852.89	0	-2.2	28	Non	219.19	105.57	105.57	2.62	1125	>sp|P02817|AMELX_BOVIN Amelogenin, X isoform OS=Bos taurus OX=9913 GN=AMELX PE=1 SV=2	1	hf1_eb_18273_82_20032023.ScanId;v=1;d1=29150.29150.2	controllerType=0 controllerNumber=1 scan=29150	64.2047
14596:1	1	Y.IN[+0.984]FS[+79.966].Y		N[+1], S[+80]	561.195	1	561.195	561.196	0	-0.6	29	Non	124.39	124.39	124.39	0.6	1125	>sp|P02817|AMELX_BOVIN Amelogenin, X isoform OS=Bos taurus OX=9913 GN=AMELX PE=1 SV=2	1	hf1_eb_18273_82_20032023.ScanId;v=1;d1=13699.13699.2	controllerType=0 controllerNumber=1 scan=13699	36.0652
14352:1	1	Y.IN[+0.984]FS[+79.966].Y		N[+1], S[+80]	561.195	1	561.195	561.196	0	-0.6	29	Non	161.04	161.04	161.04	1.58	1125	>sp|P02817|AMELX_BOVIN Amelogenin, X isoform OS=Bos taurus OX=9913 GN=AMELX PE=1 SV=2	1	hf1_eb_18273_82_20032023.ScanId;v=1;d1=13519.13519.2	controllerType=0 controllerNumber=1 scan=13519	35.7225
14194:1	1	Y.IN[+0.984]FS[+79.966].Y		N[+1], S[+80]	561.195	1	561.195	561.196	0	-0.4	29	Non	185.38	173.84	173.84	1.58	1125	>sp|P02817|AMELX_BOVIN Amelogenin, X isoform OS=Bos taurus OX=9913 GN=AMELX PE=1 SV=2	1	hf1_eb_18273_82_20032023.ScanId;v=1;d1=13402.13402.2	controllerType=0 controllerNumber=1 scan=13402	35.5006
17241:1	1	Y.IN[+0.984]FSYE.V		N[+1]	773.334	1	773.334	773.335	0	-2	29	Non	201.82	106.32	106.32	1.03	1125	>sp|P02817|AMELX_BOVIN Amelogenin, X isoform OS=Bos taurus OX=9913 GN=AMELX PE=1 SV=2	1	hf1_eb_18273_82_20032023.ScanId;v=1;d1=15617.15617.2	controllerType=0 controllerNumber=1 scan=15617	39.525
20969:1	1	Y.IN[+0.984]FS[+79.966]YE.V		N[+1], S[+80]	853.302	1	853.302	853.302	0	0.9	29	Non	87.85	87.85	87.85	0.67	1125	>sp|P02817|AMELX_BOVIN Amelogenin, X isoform OS=Bos taurus OX=9913 GN=AMELX PE=1 SV=2	1	hf1_eb_18273_82_20032023.ScanId;v=1;d1=18404.18404.2	controllerType=0 controllerNumber=1 scan=18404	44.5985
24842:1	1	Y.IN[+0.984]FSYEV.L		N[+1]	872.404	1	872.404	872.404	0	-0.1	29	Non	273.78	56.22	56.22	2.45	1125	>sp|P02817|AMELX_BOVIN Amelogenin, X isoform OS=Bos taurus OX=9913 GN=AMELX PE=1 SV=2	1	hf1_eb_18273_82_20032023.ScanId;v=1;d1=21192.21192.2	controllerType=0 controllerNumber=1 scan=21192	49.646
26420:2	1	Y.INFSYEVL.T			492.755	2	984.504	984.504	0	0	29	Non	93.32	93.32	93.32	0.56	1125	>sp|P02817|AMELX_BOVIN Amelogenin, X isoform OS=Bos taurus OX=9913 GN=AMELX PE=1 SV=2	1	hf1_eb_18273_82_20032023.ScanId;v=1;d1=22319.22319.2	controllerType=0 controllerNumber=1 scan=22319	51.7203
26395:2	1	Y.INFSYEVL.T			492.755	2	984.503	984.504	0	-0.5	29	Non	169.53	119.03	119.03	0.56	1125	>sp|P02817|AMELX_BOVIN Amelogenin, X isoform OS=Bos taurus OX=9913 GN=AMELX PE=1 SV=2	1	hf1_eb_18273_82_20032023.ScanId;v=1;d1=22303.22303.2	controllerType=0 controllerNumber=1 scan=22303	51.6906
26127:2	1	Y.INFSYEVL.T			492.755	2	984.503	984.504	0	-1.1	29	Non	202.55	172.29	172.29	1.87	1125	>sp|P02817|AMELX_BOVIN Amelogenin, X isoform OS=Bos taurus OX=9913 GN=AMELX PE=1 SV=2	1	hf1_eb_18273_82_20032023.ScanId;v=1;d1=22115.22115.2	controllerType=0 controllerNumber=1 scan=22115	51.3465
27846:2	1	Y.INFSYEVL.T			492.755	2	984.504	984.504	0	-0.1	29	Non	216.47	176.42	176.42	1.87	1125	>sp|P02817|AMELX_BOVIN Amelogenin, X isoform OS=Bos taurus OX=9913 GN=AMELX PE=1 SV=2	1	hf1_eb_18273_82_20032023.ScanId;v=1;d1=23289.23289.2	controllerType=0 controllerNumber=1 scan=23289	53.4609
32078:1	1	Y.IN[+0.984]FSYEVL.T		N[+1]	985.488	1	985.488	985.488	0	0.4	29	Non	169.66	169.66	169.66	2.44	1125	>sp|P02817|AMELX_BOVIN Amelogenin, X isoform OS=Bos taurus OX=9913 GN=AMELX PE=1 SV=2	1	hf1_eb_18273_82_20032023.ScanId;v=1;d1=26259.26259.2	controllerType=0 controllerNumber=1 scan=26259	58.823
33796:2	1	Y.IN[+0.984]FS[+79.966]YEVL.T		N[+1], S[+80]	533.231	2	1065.45	1065.45	0	0.6	29	Non	135.78	135.78	135.78	0.62	1125	>sp|P02817|AMELX_BOVIN Amelogenin, X isoform OS=Bos taurus OX=9913 GN=AMELX PE=1 SV=2	1	hf1_eb_18273_82_20032023.ScanId;v=1;d1=27453.27453.2	controllerType=0 controllerNumber=1 scan=27453	61.0623
33524:2	1	Y.IN[+0.984]FS[+79.966]YEVL.T		N[+1], S[+80]	533.231	2	1065.46	1065.45	0	1	29	Non	155.41	155.41	155.41	1.11	1125	>sp|P02817|AMELX_BOVIN Amelogenin, X isoform OS=Bos taurus OX=9913 GN=AMELX PE=1 SV=2	1	hf1_eb_18273_82_20032023.ScanId;v=1;d1=27263.27263.2	controllerType=0 controllerNumber=1 scan=27263	60.7098
31067:2	1	Y.IN[+0.984]FS[+79.966]YEVLT.P		N[+1], S[+80]	583.754	2	1166.5	1166.5	0	-0.2	29	Non	117.45	117.45	117.45	1.01	1125	>sp|P02817|AMELX_BOVIN Amelogenin, X isoform OS=Bos taurus OX=9913 GN=AMELX PE=1 SV=2	1	hf1_eb_18273_82_20032023.ScanId;v=1;d1=25544.25544.2	controllerType=0 controllerNumber=1 scan=25544	57.5159
32420:2	1	Y.INFS[+79.966]YEVLTP.L		S[+80]	631.788	2	1262.57	1262.57	0	-1.4	29	Non	160.66	160.66	160.66	1.32	1125	>sp|P02817|AMELX_BOVIN Amelogenin, X isoform OS=Bos taurus OX=9913 GN=AMELX PE=1 SV=2	1	hf1_eb_18273_82_20032023.ScanId;v=1;d1=26507.26507.2	controllerType=0 controllerNumber=1 scan=26507	59.2916
33561:2	1	Y.IN[+0.984]FS[+79.966]YEVLTP.L		N[+1], S[+80]	632.282	2	1263.56	1263.55	0	1.2	29	Non	201.5	91.26	91.26	1.52	1125	>sp|P02817|AMELX_BOVIN Amelogenin, X isoform OS=Bos taurus OX=9913 GN=AMELX PE=1 SV=2	1	hf1_eb_18273_82_20032023.ScanId;v=1;d1=27289.27289.2	controllerType=0 controllerNumber=1 scan=27289	60.7578
33308:2	1	Y.IN[+0.984]FS[+79.966]YEVLTP.L		N[+1], S[+80]	632.281	2	1263.55	1263.55	0	0.1	29	Non	268.11	130.68	130.68	3.25	1125	>sp|P02817|AMELX_BOVIN Amelogenin, X isoform OS=Bos taurus OX=9913 GN=AMELX PE=1 SV=2	1	hf1_eb_18273_82_20032023.ScanId;v=1;d1=27106.27106.2	controllerType=0 controllerNumber=1 scan=27106	60.4134
32959:2	1	Y.INFSYEVLTPL.K			648.348	2	1295.69	1295.69	0	0.4	29	Non	295.4	295.4	295.4	4.45	1125	>sp|P02817|AMELX_BOVIN Amelogenin, X isoform OS=Bos taurus OX=9913 GN=AMELX PE=1 SV=2	1	hf1_eb_18273_82_20032023.ScanId;v=1;d1=26872.26872.2	controllerType=0 controllerNumber=1 scan=26872	59.9774
32296:2	1	Y.INFSYEVLTPL.K			648.348	2	1295.69	1295.69	0	0.4	29	Non	362.06	360.63	360.63	5.36	1125	>sp|P02817|AMELX_BOVIN Amelogenin, X isoform OS=Bos taurus OX=9913 GN=AMELX PE=1 SV=2	1	hf1_eb_18273_82_20032023.ScanId;v=1;d1=26414.26414.2	controllerType=0 controllerNumber=1 scan=26414	59.1173
36076:2	1	Y.IN[+0.984]FSYEVLTPL.K		N[+1]	648.84	2	1296.67	1296.67	0	-0.4	29	Non	408.15	304.62	304.62	4.56	1125	>sp|P02817|AMELX_BOVIN Amelogenin, X isoform OS=Bos taurus OX=9913 GN=AMELX PE=1 SV=2	1	hf1_eb_18273_82_20032023.ScanId;v=1;d1=29032.29032.2	controllerType=0 controllerNumber=1 scan=29032	64.008
36676:2	1	Y.IN[+0.984]FS[+79.966]YEVLTPL.K		N[+1], S[+80]	688.822	2	1376.64	1376.64	0	-2.1	29	Non	33.38	33.38	33.38	0.4	1125	>sp|P02817|AMELX_BOVIN Amelogenin, X isoform OS=Bos taurus OX=9913 GN=AMELX PE=1 SV=2	1	hf1_eb_18273_82_20032023.ScanId;v=1;d1=29464.29464.2	controllerType=0 controllerNumber=1 scan=29464	64.7641
36409:2	1	Y.IN[+0.984]FS[+79.966]YEVLTPL.K		N[+1], S[+80]	688.823	2	1376.64	1376.64	0	-0.3	29	Non	247.58	247.58	247.58	4.31	1125	>sp|P02817|AMELX_BOVIN Amelogenin, X isoform OS=Bos taurus OX=9913 GN=AMELX PE=1 SV=2	1	hf1_eb_18273_82_20032023.ScanId;v=1;d1=29274.29274.2	controllerType=0 controllerNumber=1 scan=29274	64.4148
36132:2	1	Y.IN[+0.984]FS[+79.966]YEVLTPL.K		N[+1], S[+80]	688.822	2	1376.64	1376.64	0	-1.7	29	Non	321.56	272.67	272.67	4.31	1125	>sp|P02817|AMELX_BOVIN Amelogenin, X isoform OS=Bos taurus OX=9913 GN=AMELX PE=1 SV=2	1	hf1_eb_18273_82_20032023.ScanId;v=1;d1=29069.29069.2	controllerType=0 controllerNumber=1 scan=29069	64.0697
29202:2	1	Y.INFSYEVLTPLK.W			712.395	2	1423.78	1423.78	0	-0.8	29	NRagged	197.06	162.68	162.68	3.67	1125	>sp|P02817|AMELX_BOVIN Amelogenin, X isoform OS=Bos taurus OX=9913 GN=AMELX PE=1 SV=2	1	hf1_eb_18273_82_20032023.ScanId;v=1;d1=24217.24217.2	controllerType=0 controllerNumber=1 scan=24217	55.1079
26378:3	1	Y.INFSYEVLTPLK.W			475.266	3	1423.78	1423.78	0	-0.1	29	NRagged	213.64	213.64	213.64	4.09	1125	>sp|P02817|AMELX_BOVIN Amelogenin, X isoform OS=Bos taurus OX=9913 GN=AMELX PE=1 SV=2	1	hf1_eb_18273_82_20032023.ScanId;v=1;d1=22289.22289.3	controllerType=0 controllerNumber=1 scan=22289	51.6668
25700:3	1	Y.INFSYEVLTPLK.W			475.265	3	1423.78	1423.78	0	-1	29	NRagged	245.31	175.16	175.16	5.03	1125	>sp|P02817|AMELX_BOVIN Amelogenin, X isoform OS=Bos taurus OX=9913 GN=AMELX PE=1 SV=2	1	hf1_eb_18273_82_20032023.ScanId;v=1;d1=21795.21795.3	controllerType=0 controllerNumber=1 scan=21795	50.7545
25292:3	1	Y.INFSYEVLTPLK.W			475.265	3	1423.78	1423.78	0	-1.2	29	NRagged	349.35	349.35	349.35	5.69	1125	>sp|P02817|AMELX_BOVIN Amelogenin, X isoform OS=Bos taurus OX=9913 GN=AMELX PE=1 SV=2	1	hf1_eb_18273_82_20032023.ScanId;v=1;d1=21503.21503.3	controllerType=0 controllerNumber=1 scan=21503	50.2177
26384:3	1	Y.INFSYEVLTPLK.W			475.266	3	1423.78	1423.78	0	-0.1	29	NRagged	369.22	369.22	369.22	6.75	1125	>sp|P02817|AMELX_BOVIN Amelogenin, X isoform OS=Bos taurus OX=9913 GN=AMELX PE=1 SV=2	1	hf1_eb_18273_82_20032023.ScanId;v=1;d1=22294.22294.3	controllerType=0 controllerNumber=1 scan=22294	51.6743
25772:3	1	Y.INFSYEVLTPLK.W			475.265	3	1423.78	1423.78	0	-1.3	29	NRagged	394.03	309.36	309.36	5.95	1125	>sp|P02817|AMELX_BOVIN Amelogenin, X isoform OS=Bos taurus OX=9913 GN=AMELX PE=1 SV=2	1	hf1_eb_18273_82_20032023.ScanId;v=1;d1=21852.21852.3	controllerType=0 controllerNumber=1 scan=21852	50.8704
33087:2	1	Y.IN[+0.984]FSYEVLTPLK.W		N[+1]	712.888	2	1424.77	1424.77	0	1.2	29	NRagged	60.03	60.03	60.03	1.54	1125	>sp|P02817|AMELX_BOVIN Amelogenin, X isoform OS=Bos taurus OX=9913 GN=AMELX PE=1 SV=2	1	hf1_eb_18273_82_20032023.ScanId;v=1;d1=26952.26952.2	controllerType=0 controllerNumber=1 scan=26952	60.122
31868:2	1	Y.IN[+0.984]FSYEVLTPLK.W		N[+1]	712.887	2	1424.77	1424.77	0	-0.1	29	NRagged	111.74	111.74	111.74	2.5	1125	>sp|P02817|AMELX_BOVIN Amelogenin, X isoform OS=Bos taurus OX=9913 GN=AMELX PE=1 SV=2	1	hf1_eb_18273_82_20032023.ScanId;v=1;d1=26114.26114.4	controllerType=0 controllerNumber=1 scan=26114	58.5595
32239:2	1	Y.INFS[+79.966]YEVLTPLK.W		S[+80]	752.378	2	1503.75	1503.75	0	-0.6	29	NRagged	171.11	171.11	171.11	3.22	1125	>sp|P02817|AMELX_BOVIN Amelogenin, X isoform OS=Bos taurus OX=9913 GN=AMELX PE=1 SV=2	1	hf1_eb_18273_82_20032023.ScanId;v=1;d1=26375.26375.2	controllerType=0 controllerNumber=1 scan=26375	59.0439
30816:2	1	Y.IN[+0.984]FSYEVLTPLK.W		N[+1]	712.888	2	1424.77	1424.77	0	0.4	29	NRagged	224.46	183.43	183.43	4.21	1125	>sp|P02817|AMELX_BOVIN Amelogenin, X isoform OS=Bos taurus OX=9913 GN=AMELX PE=1 SV=2	1	hf1_eb_18273_82_20032023.ScanId;v=1;d1=25380.25380.2	controllerType=0 controllerNumber=1 scan=25380	57.2265
30751:2	1	Y.IN[+0.984]FSYEVLTPLK.W		N[+1]	712.888	2	1424.77	1424.77	0	0.6	29	NRagged	230.06	230.06	230.06	4.47	1125	>sp|P02817|AMELX_BOVIN Amelogenin, X isoform OS=Bos taurus OX=9913 GN=AMELX PE=1 SV=2	1	hf1_eb_18273_82_20032023.ScanId;v=1;d1=25338.25338.2	controllerType=0 controllerNumber=1 scan=25338	57.1524
31311:2	1	Y.IN[+0.984]FSYEVLTPLK.W		N[+1]	712.887	2	1424.77	1424.77	0	0.2	29	NRagged	302.55	302.55	302.55	6.23	1125	>sp|P02817|AMELX_BOVIN Amelogenin, X isoform OS=Bos taurus OX=9913 GN=AMELX PE=1 SV=2	1	hf1_eb_18273_82_20032023.ScanId;v=1;d1=25714.25714.2	controllerType=0 controllerNumber=1 scan=25714	57.8292
28602:2	1	Y.IN[+0.984]FSYEVLTPLK.W		N[+1]	712.887	2	1424.77	1424.77	0	-0.7	29	NRagged	317.4	317.4	317.4	6.13	1125	>sp|P02817|AMELX_BOVIN Amelogenin, X isoform OS=Bos taurus OX=9913 GN=AMELX PE=1 SV=2	1	hf1_eb_18273_82_20032023.ScanId;v=1;d1=23799.23799.2	controllerType=0 controllerNumber=1 scan=23799	54.3604
31450:2	1	Y.INFS[+79.966]YEVLTPLK.W		S[+80]	752.377	2	1503.75	1503.75	0	-1.3	29	NRagged	420.55	420.55	420.55	7.55	1125	>sp|P02817|AMELX_BOVIN Amelogenin, X isoform OS=Bos taurus OX=9913 GN=AMELX PE=1 SV=2	1	hf1_eb_18273_82_20032023.ScanId;v=1;d1=25811.25811.2	controllerType=0 controllerNumber=1 scan=25811	57.999
29651:2	1	Y.IN[+0.984]FSYEVLTPLK.W		N[+1]	712.887	2	1424.77	1424.77	0	-0.7	29	NRagged	421.62	421.62	421.62	7.55	1125	>sp|P02817|AMELX_BOVIN Amelogenin, X isoform OS=Bos taurus OX=9913 GN=AMELX PE=1 SV=2	1	hf1_eb_18273_82_20032023.ScanId;v=1;d1=24539.24539.2	controllerType=0 controllerNumber=1 scan=24539	55.7011
31702:2	1	Y.INFS[+79.966]YEVLTPLK.W		S[+80]	752.378	2	1503.75	1503.75	0	-0.8	29	NRagged	554.47	499.7	499.7	7.67	1125	>sp|P02817|AMELX_BOVIN Amelogenin, X isoform OS=Bos taurus OX=9913 GN=AMELX PE=1 SV=2	1	hf1_eb_18273_82_20032023.ScanId;v=1;d1=25998.25998.2	controllerType=0 controllerNumber=1 scan=25998	58.3507
30185:2	1	Y.IN[+0.984]FSYEVLTPLK.W		N[+1]	712.886	2	1424.77	1424.77	0	-1.5	29	NRagged	617.84	473.13	473.13	9.13	1125	>sp|P02817|AMELX_BOVIN Amelogenin, X isoform OS=Bos taurus OX=9913 GN=AMELX PE=1 SV=2	1	hf1_eb_18273_82_20032023.ScanId;v=1;d1=24915.24915.2	controllerType=0 controllerNumber=1 scan=24915	56.379
29927:2	1	Y.IN[+0.984]FSYEVLTPLK.W		N[+1]	712.886	2	1424.77	1424.77	0	-1.2	29	NRagged	634.44	499.64	499.64	9.13	1125	>sp|P02817|AMELX_BOVIN Amelogenin, X isoform OS=Bos taurus OX=9913 GN=AMELX PE=1 SV=2	1	hf1_eb_18273_82_20032023.ScanId;v=1;d1=24730.24730.2	controllerType=0 controllerNumber=1 scan=24730	56.0433
30919:2	1	Y.IN[+0.984]FS[+79.966]YEVLTPLK.W		N[+1], S[+80]	752.87	2	1504.73	1504.73	0	-0.3	29	NRagged	120.3	120.3	120.3	2.5	1125	>sp|P02817|AMELX_BOVIN Amelogenin, X isoform OS=Bos taurus OX=9913 GN=AMELX PE=1 SV=2	1	hf1_eb_18273_82_20032023.ScanId;v=1;d1=25447.25447.3	controllerType=0 controllerNumber=1 scan=25447	57.3444
34503:2	1	Y.IN[+0.984]FS[+79.966]YEVLTPLK.W		N[+1], S[+80]	752.87	2	1504.73	1504.73	0	-1.2	29	NRagged	172.84	172.84	172.84	3.67	1125	>sp|P02817|AMELX_BOVIN Amelogenin, X isoform OS=Bos taurus OX=9913 GN=AMELX PE=1 SV=2	1	hf1_eb_18273_82_20032023.ScanId;v=1;d1=27949.27949.2	controllerType=0 controllerNumber=1 scan=27949	62.005
35565:2	1	Y.IN[+0.984]FS[+79.966]YEVLTPLK.W		N[+1], S[+80]	752.87	2	1504.73	1504.73	0	0	29	NRagged	225.79	225.79	225.79	3.93	1125	>sp|P02817|AMELX_BOVIN Amelogenin, X isoform OS=Bos taurus OX=9913 GN=AMELX PE=1 SV=2	1	hf1_eb_18273_82_20032023.ScanId;v=1;d1=28688.28688.2	controllerType=0 controllerNumber=1 scan=28688	63.3958
32240:2	1	Y.IN[+0.984]FS[+79.966]YEVLTPLK.W		N[+1], S[+80]	752.87	2	1504.73	1504.73	0	-0.8	29	NRagged	260.48	260.48	260.48	5.73	1125	>sp|P02817|AMELX_BOVIN Amelogenin, X isoform OS=Bos taurus OX=9913 GN=AMELX PE=1 SV=2	1	hf1_eb_18273_82_20032023.ScanId;v=1;d1=26375.26375.2	controllerType=0 controllerNumber=1 scan=26375	59.0439
30537:2	1	Y.IN[+0.984]FS[+79.966]YEVLTPLK.W		N[+1], S[+80]	752.87	2	1504.73	1504.73	0	-0.8	29	NRagged	268.54	268.54	162.25	4.83	1125	>sp|P02817|AMELX_BOVIN Amelogenin, X isoform OS=Bos taurus OX=9913 GN=AMELX PE=1 SV=2	1	hf1_eb_18273_82_20032023.ScanId;v=1;d1=25186.25186.3	controllerType=0 controllerNumber=1 scan=25186	56.8802
33220:2	1	Y.IN[+0.984]FS[+79.966]YEVLTPLK.W		N[+1], S[+80]	752.87	2	1504.73	1504.73	0	-0.2	29	NRagged	331.44	331.44	331.44	6.32	1125	>sp|P02817|AMELX_BOVIN Amelogenin, X isoform OS=Bos taurus OX=9913 GN=AMELX PE=1 SV=2	1	hf1_eb_18273_82_20032023.ScanId;v=1;d1=27046.27046.3	controllerType=0 controllerNumber=1 scan=27046	60.3018
30783:2	1	Y.IN[+0.984]FS[+79.966]YEVLTPLK.W		N[+1], S[+80]	752.87	2	1504.73	1504.73	0	0	29	NRagged	403.54	403.54	241.8	6.9	1125	>sp|P02817|AMELX_BOVIN Amelogenin, X isoform OS=Bos taurus OX=9913 GN=AMELX PE=1 SV=2	1	hf1_eb_18273_82_20032023.ScanId;v=1;d1=25359.25359.2	controllerType=0 controllerNumber=1 scan=25359	57.1891
33301:2	1	Y.IN[+0.984]FS[+79.966]YEVLTPLK.W		N[+1], S[+80]	752.87	2	1504.73	1504.73	0	-0.2	29	NRagged	437.4	437.4	435.05	7.13	1125	>sp|P02817|AMELX_BOVIN Amelogenin, X isoform OS=Bos taurus OX=9913 GN=AMELX PE=1 SV=2	1	hf1_eb_18273_82_20032023.ScanId;v=1;d1=27100.27100.2	controllerType=0 controllerNumber=1 scan=27100	60.4014
32768:2	1	Y.IN[+0.984]FS[+79.966]YEVLTPLK.W		N[+1], S[+80]	752.87	2	1504.73	1504.73	0	-0.5	29	NRagged	438.51	438.51	416.37	7.55	1125	>sp|P02817|AMELX_BOVIN Amelogenin, X isoform OS=Bos taurus OX=9913 GN=AMELX PE=1 SV=2	1	hf1_eb_18273_82_20032023.ScanId;v=1;d1=26743.26743.2	controllerType=0 controllerNumber=1 scan=26743	59.7297
32944:2	1	Y.IN[+0.984]FS[+79.966]YEVLTPLK.W		N[+1], S[+80]	752.87	2	1504.73	1504.73	0	0.1	29	NRagged	491.15	469.57	446.89	7.57	1125	>sp|P02817|AMELX_BOVIN Amelogenin, X isoform OS=Bos taurus OX=9913 GN=AMELX PE=1 SV=2	1	hf1_eb_18273_82_20032023.ScanId;v=1;d1=26861.26861.3	controllerType=0 controllerNumber=1 scan=26861	59.9578
31084:2	1	Y.IN[+0.984]FS[+79.966]YEVLTPLK.W		N[+1], S[+80]	752.87	2	1504.73	1504.73	0	-1.1	29	NRagged	500.73	500.73	451.95	7.59	1125	>sp|P02817|AMELX_BOVIN Amelogenin, X isoform OS=Bos taurus OX=9913 GN=AMELX PE=1 SV=2	1	hf1_eb_18273_82_20032023.ScanId;v=1;d1=25556.25556.2	controllerType=0 controllerNumber=1 scan=25556	57.5367
31975:2	1	Y.IN[+0.984]FS[+79.966]YEVLTPLK.W		N[+1], S[+80]	752.87	2	1504.73	1504.73	0	-0.7	29	NRagged	589.18	539.37	539.37	8.13	1125	>sp|P02817|AMELX_BOVIN Amelogenin, X isoform OS=Bos taurus OX=9913 GN=AMELX PE=1 SV=2	1	hf1_eb_18273_82_20032023.ScanId;v=1;d1=26186.26186.2	controllerType=0 controllerNumber=1 scan=26186	58.6903
32500:2	1	Y.IN[+0.984]FS[+79.966]YEVLTPLK.W		N[+1], S[+80]	752.87	2	1504.73	1504.73	0	0.2	29	NRagged	599.84	579.71	541.4	8.11	1125	>sp|P02817|AMELX_BOVIN Amelogenin, X isoform OS=Bos taurus OX=9913 GN=AMELX PE=1 SV=2	1	hf1_eb_18273_82_20032023.ScanId;v=1;d1=26562.26562.2	controllerType=0 controllerNumber=1 scan=26562	59.3942
36021:2	1	Y.IN[+0.984]FSYEVLTPLKW.Y		N[+1]	805.926	2	1610.85	1610.85	0	-0.9	29	Non	481.96	481.96	481.96	7.64	1125	>sp|P02817|AMELX_BOVIN Amelogenin, X isoform OS=Bos taurus OX=9913 GN=AMELX PE=1 SV=2	1	hf1_eb_18273_82_20032023.ScanId;v=1;d1=28993.28993.2	controllerType=0 controllerNumber=1 scan=28993	63.9401
36249:2	1	Y.IN[+0.984]FS[+79.966]YEVLTPLKW.Y		N[+1], S[+80]	845.91	2	1690.81	1690.81	0	0.1	29	Non	383.59	383.59	328.51	6.95	1125	>sp|P02817|AMELX_BOVIN Amelogenin, X isoform OS=Bos taurus OX=9913 GN=AMELX PE=1 SV=2	1	hf1_eb_18273_82_20032023.ScanId;v=1;d1=29159.29159.2	controllerType=0 controllerNumber=1 scan=29159	64.2196
36033:2	1	Y.IN[+0.984]FSYEVLTPLKWYQ[+0.984].S		N[+1], Q[+1]	951.981	2	1902.96	1902.95	0	1.7	29	Non	444.57	336.15	336.15	6.75	1125	>sp|P02817|AMELX_BOVIN Amelogenin, X isoform OS=Bos taurus OX=9913 GN=AMELX PE=1 SV=2	1	hf1_eb_18273_82_20032023.ScanId;v=1;d1=29002.29002.2	controllerType=0 controllerNumber=1 scan=29002	63.9565
36212:2	1	Y.IN[+0.984]FS[+79.966]YEVLTPLKWYQ[+0.984].S		N[+1], Q[+1], S[+80]	991.963	2	1982.92	1982.92	0	0.3	29	Non	426.82	391.88	391.88	7.83	1125	>sp|P02817|AMELX_BOVIN Amelogenin, X isoform OS=Bos taurus OX=9913 GN=AMELX PE=1 SV=2	1	hf1_eb_18273_82_20032023.ScanId;v=1;d1=29134.29134.2	controllerType=0 controllerNumber=1 scan=29134	64.1785
28030:1	1	I.N[+0.984]FSYEVL.T		N[+1]	872.403	1	872.403	872.404	0	-0.4	30	Non	237.13	171.39	171.39	2.19	1125	>sp|P02817|AMELX_BOVIN Amelogenin, X isoform OS=Bos taurus OX=9913 GN=AMELX PE=1 SV=2	1	hf1_eb_18273_82_20032023.ScanId;v=1;d1=23410.23410.2	controllerType=0 controllerNumber=1 scan=23410	53.6753
31173:1	1	I.N[+0.984]FS[+79.966]YEVL.T		N[+1], S[+80]	952.371	1	952.371	952.37	0	1.3	30	Non	90.76	90.76	90.76	1.25	1125	>sp|P02817|AMELX_BOVIN Amelogenin, X isoform OS=Bos taurus OX=9913 GN=AMELX PE=1 SV=2	1	hf1_eb_18273_82_20032023.ScanId;v=1;d1=25619.25619.3	controllerType=0 controllerNumber=1 scan=25619	57.6489
30972:2	1	I.N[+0.984]FS[+79.966]YEVL.T		N[+1], S[+80]	476.689	2	952.37	952.37	0	0.2	30	Non	106.34	106.34	106.34	0.97	1125	>sp|P02817|AMELX_BOVIN Amelogenin, X isoform OS=Bos taurus OX=9913 GN=AMELX PE=1 SV=2	1	hf1_eb_18273_82_20032023.ScanId;v=1;d1=25480.25480.2	controllerType=0 controllerNumber=1 scan=25480	57.4025
31252:2	1	I.N[+0.984]FS[+79.966]YEVL.T		N[+1], S[+80]	476.688	2	952.37	952.37	0	-0.2	30	Non	107.58	107.58	107.58	0.99	1125	>sp|P02817|AMELX_BOVIN Amelogenin, X isoform OS=Bos taurus OX=9913 GN=AMELX PE=1 SV=2	1	hf1_eb_18273_82_20032023.ScanId;v=1;d1=25674.25674.2	controllerType=0 controllerNumber=1 scan=25674	57.7516
31255:1	1	I.N[+0.984]FS[+79.966]YEVL.T		N[+1], S[+80]	952.371	1	952.371	952.37	0	1.1	30	Non	174.42	120.32	120.32	2.26	1125	>sp|P02817|AMELX_BOVIN Amelogenin, X isoform OS=Bos taurus OX=9913 GN=AMELX PE=1 SV=2	1	hf1_eb_18273_82_20032023.ScanId;v=1;d1=25676.25676.3	controllerType=0 controllerNumber=1 scan=25676	57.7546
36520:2	1	I.N[+0.984]FS[+79.966]YEVLTPL.K		N[+1], S[+80]	632.281	2	1263.55	1263.55	0	0.3	30	Non	75.43	75.43	75.43	0.36	1125	>sp|P02817|AMELX_BOVIN Amelogenin, X isoform OS=Bos taurus OX=9913 GN=AMELX PE=1 SV=2	1	hf1_eb_18273_82_20032023.ScanId;v=1;d1=29351.29351.2	controllerType=0 controllerNumber=1 scan=29351	64.5485
36205:2	1	I.N[+0.984]FS[+79.966]YEVLTPL.K		N[+1], S[+80]	632.281	2	1263.55	1263.55	0	-0.3	30	Non	252.12	193.02	193.02	3.89	1125	>sp|P02817|AMELX_BOVIN Amelogenin, X isoform OS=Bos taurus OX=9913 GN=AMELX PE=1 SV=2	1	hf1_eb_18273_82_20032023.ScanId;v=1;d1=29128.29128.2	controllerType=0 controllerNumber=1 scan=29128	64.1667
28661:2	1	I.NFS[+79.966]YEVLTPLK.W		S[+80]	695.835	2	1390.66	1390.67	0	-1.4	30	NRagged	407.57	379.59	379.59	7.13	1125	>sp|P02817|AMELX_BOVIN Amelogenin, X isoform OS=Bos taurus OX=9913 GN=AMELX PE=1 SV=2	1	hf1_eb_18273_82_20032023.ScanId;v=1;d1=23841.23841.2	controllerType=0 controllerNumber=1 scan=23841	54.4344
26862:2	1	I.N[+0.984]FSYEVLTPLK.W		N[+1]	656.345	2	1311.68	1311.68	0	-0.1	30	NRagged	461.16	461.16	461.16	7.15	1125	>sp|P02817|AMELX_BOVIN Amelogenin, X isoform OS=Bos taurus OX=9913 GN=AMELX PE=1 SV=2	1	hf1_eb_18273_82_20032023.ScanId;v=1;d1=22619.22619.2	controllerType=0 controllerNumber=1 scan=22619	52.2549
27593:2	1	I.N[+0.984]FSYEVLTPLK.W		N[+1]	656.345	2	1311.68	1311.68	0	-0.3	30	NRagged	467.48	431.7	431.7	7.57	1125	>sp|P02817|AMELX_BOVIN Amelogenin, X isoform OS=Bos taurus OX=9913 GN=AMELX PE=1 SV=2	1	hf1_eb_18273_82_20032023.ScanId;v=1;d1=23117.23117.2	controllerType=0 controllerNumber=1 scan=23117	53.1567
29477:2	1	I.N[+0.984]FSYEVLTPLK.W		N[+1]	656.344	2	1311.68	1311.68	0	-1.2	30	NRagged	515.79	499.27	499.27	7.59	1125	>sp|P02817|AMELX_BOVIN Amelogenin, X isoform OS=Bos taurus OX=9913 GN=AMELX PE=1 SV=2	1	hf1_eb_18273_82_20032023.ScanId;v=1;d1=24414.24414.2	controllerType=0 controllerNumber=1 scan=24414	55.4744
30624:2	1	I.N[+0.984]FSY[+31.990]EVLTPLK.W		N[+1], Y[+32]	672.346	2	1343.69	1343.67	0	9.1	30	NRagged	181.77	110.44	12.31	1.35	1125	>sp|P02817|AMELX_BOVIN Amelogenin, X isoform OS=Bos taurus OX=9913 GN=AMELX PE=1 SV=2	1	hf1_eb_18273_82_20032023.ScanId;v=1;d1=25250.25250.3	controllerType=0 controllerNumber=1 scan=25250	56.9977
31613:2	1	I.N[+0.984]FS[+79.966]YEVLTPLK.W		N[+1], S[+80]	696.329	2	1391.65	1391.65	0	0.4	30	NRagged	239.81	239.81	239.81	3.91	1125	>sp|P02817|AMELX_BOVIN Amelogenin, X isoform OS=Bos taurus OX=9913 GN=AMELX PE=1 SV=2	1	hf1_eb_18273_82_20032023.ScanId;v=1;d1=25932.25932.2	controllerType=0 controllerNumber=1 scan=25932	58.227
30358:2	1	I.N[+0.984]FS[+79.966]YEVLTPLK.W		N[+1], S[+80]	696.327	2	1391.65	1391.65	0	-1.9	30	NRagged	334.48	334.48	334.48	5.86	1125	>sp|P02817|AMELX_BOVIN Amelogenin, X isoform OS=Bos taurus OX=9913 GN=AMELX PE=1 SV=2	1	hf1_eb_18273_82_20032023.ScanId;v=1;d1=25044.25044.2	controllerType=0 controllerNumber=1 scan=25044	56.6069
31074:2	1	I.N[+0.984]FS[+79.966]YEVLTPLK.W		N[+1], S[+80]	696.329	2	1391.65	1391.65	0	0.4	30	NRagged	360.56	360.56	360.56	6.9	1125	>sp|P02817|AMELX_BOVIN Amelogenin, X isoform OS=Bos taurus OX=9913 GN=AMELX PE=1 SV=2	1	hf1_eb_18273_82_20032023.ScanId;v=1;d1=25549.25549.2	controllerType=0 controllerNumber=1 scan=25549	57.5234
29832:2	1	I.N[+0.984]FS[+79.966]YEVLTPLK.W		N[+1], S[+80]	696.327	2	1391.65	1391.65	0	-2	30	NRagged	451.62	451.62	451.62	7.22	1125	>sp|P02817|AMELX_BOVIN Amelogenin, X isoform OS=Bos taurus OX=9913 GN=AMELX PE=1 SV=2	1	hf1_eb_18273_82_20032023.ScanId;v=1;d1=24663.24663.2	controllerType=0 controllerNumber=1 scan=24663	55.9208
30099:2	1	I.N[+0.984]FS[+79.966]YEVLTPLK.W		N[+1], S[+80]	696.328	2	1391.65	1391.65	0	-0.9	30	NRagged	543.07	433.49	433.49	7.67	1125	>sp|P02817|AMELX_BOVIN Amelogenin, X isoform OS=Bos taurus OX=9913 GN=AMELX PE=1 SV=2	1	hf1_eb_18273_82_20032023.ScanId;v=1;d1=24853.24853.2	controllerType=0 controllerNumber=1 scan=24853	56.2608
25279:2	1	N.FSYEVL.T			379.192	2	757.376	757.377	0	-0.5	31	Non	189.95	189.95	189.95	1.79	1125	>sp|P02817|AMELX_BOVIN Amelogenin, X isoform OS=Bos taurus OX=9913 GN=AMELX PE=1 SV=2	1	hf1_eb_18273_82_20032023.ScanId;v=1;d1=21494.21494.2	controllerType=0 controllerNumber=1 scan=21494	50.2014
25525:1	1	N.FSYEVL.T			757.376	1	757.376	757.377	0	-0.4	31	Non	210.88	178.74	178.74	2.19	1125	>sp|P02817|AMELX_BOVIN Amelogenin, X isoform OS=Bos taurus OX=9913 GN=AMELX PE=1 SV=2	1	hf1_eb_18273_82_20032023.ScanId;v=1;d1=21668.21668.3	controllerType=0 controllerNumber=1 scan=21668	50.5192
23784:1	1	N.FSYEVL.T			757.377	1	757.377	757.377	0	0.1	31	Non	283.32	272.1	272.1	4.03	1125	>sp|P02817|AMELX_BOVIN Amelogenin, X isoform OS=Bos taurus OX=9913 GN=AMELX PE=1 SV=2	1	hf1_eb_18273_82_20032023.ScanId;v=1;d1=20424.20424.2	controllerType=0 controllerNumber=1 scan=20424	48.2605
28866:1	1	N.FS[+79.966]YEVL.T		S[+80]	837.342	1	837.342	837.343	0	-0.6	31	Non	140.26	140.26	140.26	2.13	1125	>sp|P02817|AMELX_BOVIN Amelogenin, X isoform OS=Bos taurus OX=9913 GN=AMELX PE=1 SV=2	1	hf1_eb_18273_82_20032023.ScanId;v=1;d1=23983.23983.2	controllerType=0 controllerNumber=1 scan=23983	54.6882
28856:2	1	N.FS[+79.966]YEVL.T		S[+80]	419.175	2	837.342	837.343	0	-1	31	Non	181.17	181.17	181.17	2.22	1125	>sp|P02817|AMELX_BOVIN Amelogenin, X isoform OS=Bos taurus OX=9913 GN=AMELX PE=1 SV=2	1	hf1_eb_18273_82_20032023.ScanId;v=1;d1=23976.23976.2	controllerType=0 controllerNumber=1 scan=23976	54.6758
28892:2	1	N.FS[+79.966]YEVL.T		S[+80]	419.175	2	837.342	837.343	0	-0.7	31	Non	190.71	190.71	190.71	2.55	1125	>sp|P02817|AMELX_BOVIN Amelogenin, X isoform OS=Bos taurus OX=9913 GN=AMELX PE=1 SV=2	1	hf1_eb_18273_82_20032023.ScanId;v=1;d1=24002.24002.2	controllerType=0 controllerNumber=1 scan=24002	54.7224
32095:2	1	N.FSYEVLTPL.K			534.784	2	1068.56	1068.56	0	0.2	31	Non	152.71	152.71	152.71	1.48	1125	>sp|P02817|AMELX_BOVIN Amelogenin, X isoform OS=Bos taurus OX=9913 GN=AMELX PE=1 SV=2	1	hf1_eb_18273_82_20032023.ScanId;v=1;d1=26271.26271.2	controllerType=0 controllerNumber=1 scan=26271	58.8469
33026:2	1	N.FSYEVLTPL.K			534.785	2	1068.56	1068.56	0	0.7	31	Non	172.59	172.59	172.59	2.55	1125	>sp|P02817|AMELX_BOVIN Amelogenin, X isoform OS=Bos taurus OX=9913 GN=AMELX PE=1 SV=2	1	hf1_eb_18273_82_20032023.ScanId;v=1;d1=26914.26914.2	controllerType=0 controllerNumber=1 scan=26914	60.0527
34678:2	1	N.FSYEVLTPL.K			534.784	2	1068.56	1068.56	0	0.2	31	Non	185.86	185.86	185.86	2.55	1125	>sp|P02817|AMELX_BOVIN Amelogenin, X isoform OS=Bos taurus OX=9913 GN=AMELX PE=1 SV=2	1	hf1_eb_18273_82_20032023.ScanId;v=1;d1=28064.28064.2	controllerType=0 controllerNumber=1 scan=28064	62.2162
32749:2	1	N.FSYEVLTPL.K			534.784	2	1068.56	1068.56	0	0.2	31	Non	217.35	217.35	217.35	2.76	1125	>sp|P02817|AMELX_BOVIN Amelogenin, X isoform OS=Bos taurus OX=9913 GN=AMELX PE=1 SV=2	1	hf1_eb_18273_82_20032023.ScanId;v=1;d1=26730.26730.2	controllerType=0 controllerNumber=1 scan=26730	59.7042
35611:2	1	N.FSYEVLTPL.K			534.784	2	1068.56	1068.56	0	0.2	31	Non	388.52	388.52	388.52	5.77	1125	>sp|P02817|AMELX_BOVIN Amelogenin, X isoform OS=Bos taurus OX=9913 GN=AMELX PE=1 SV=2	1	hf1_eb_18273_82_20032023.ScanId;v=1;d1=28716.28716.2	controllerType=0 controllerNumber=1 scan=28716	63.4471
36013:2	1	N.FS[+79.966]YEVLTPL.K		S[+80]	574.767	2	1148.53	1148.53	0	-0.5	31	Non	131.13	131.13	131.13	0.62	1125	>sp|P02817|AMELX_BOVIN Amelogenin, X isoform OS=Bos taurus OX=9913 GN=AMELX PE=1 SV=2	1	hf1_eb_18273_82_20032023.ScanId;v=1;d1=28988.28988.2	controllerType=0 controllerNumber=1 scan=28988	63.9325
35713:2	1	N.FS[+79.966]YEVLTPL.K		S[+80]	574.768	2	1148.53	1148.53	0	0.5	31	Non	224.16	197.24	197.24	2.22	1125	>sp|P02817|AMELX_BOVIN Amelogenin, X isoform OS=Bos taurus OX=9913 GN=AMELX PE=1 SV=2	1	hf1_eb_18273_82_20032023.ScanId;v=1;d1=28785.28785.2	controllerType=0 controllerNumber=1 scan=28785	63.5783
22962:2	1	N.FSYEVLTPLK.W			598.832	2	1196.66	1196.66	0	0	31	NRagged	299.99	293.98	293.98	6.13	1125	>sp|P02817|AMELX_BOVIN Amelogenin, X isoform OS=Bos taurus OX=9913 GN=AMELX PE=1 SV=2	1	hf1_eb_18273_82_20032023.ScanId;v=1;d1=19838.19838.2	controllerType=0 controllerNumber=1 scan=19838	47.1795
26188:2	1	N.FSYEVLTPLK.W			598.831	2	1196.66	1196.66	0	-0.6	31	NRagged	315.38	308.74	308.74	6.13	1125	>sp|P02817|AMELX_BOVIN Amelogenin, X isoform OS=Bos taurus OX=9913 GN=AMELX PE=1 SV=2	1	hf1_eb_18273_82_20032023.ScanId;v=1;d1=22159.22159.2	controllerType=0 controllerNumber=1 scan=22159	51.4228
23230:2	1	N.FSYEVLTPLK.W			598.831	2	1196.65	1196.66	0	-1.2	31	NRagged	497.48	370.85	370.85	7.59	1125	>sp|P02817|AMELX_BOVIN Amelogenin, X isoform OS=Bos taurus OX=9913 GN=AMELX PE=1 SV=2	1	hf1_eb_18273_82_20032023.ScanId;v=1;d1=20027.20027.2	controllerType=0 controllerNumber=1 scan=20027	47.5327
24753:2	1	N.FSYEVLTPLK.W			598.832	2	1196.66	1196.66	0	-0.4	31	NRagged	560.21	356.09	356.09	7.44	1125	>sp|P02817|AMELX_BOVIN Amelogenin, X isoform OS=Bos taurus OX=9913 GN=AMELX PE=1 SV=2	1	hf1_eb_18273_82_20032023.ScanId;v=1;d1=21131.21131.2	controllerType=0 controllerNumber=1 scan=21131	49.5401
16474:3	1	N.F[+15.995]SYEVLTPLK.W		F[+16]	404.889	3	1212.65	1212.65	0	0	31	NRagged	10.54	10.54	6.83	0.56	1125	>sp|P02817|AMELX_BOVIN Amelogenin, X isoform OS=Bos taurus OX=9913 GN=AMELX PE=1 SV=2	1	hf1_eb_18273_82_20032023.ScanId;v=1;d1=15058.15058.3	controllerType=0 controllerNumber=1 scan=15058	38.5401
15706:3	1	N.F[+15.995]SYEVLTPLK.W		F[+16]	404.889	3	1212.65	1212.65	0	0.3	31	NRagged	28.38	0.96	0.96	0.55	1125	>sp|P02817|AMELX_BOVIN Amelogenin, X isoform OS=Bos taurus OX=9913 GN=AMELX PE=1 SV=2	1	hf1_eb_18273_82_20032023.ScanId;v=1;d1=14522.14522.3	controllerType=0 controllerNumber=1 scan=14522	37.6157
24578:2	1	N.FS[+79.966]YEVLTPLK.W		S[+80]	638.814	2	1276.62	1276.62	0	-1.5	31	NRagged	144.57	144.57	144.57	2.2	1125	>sp|P02817|AMELX_BOVIN Amelogenin, X isoform OS=Bos taurus OX=9913 GN=AMELX PE=1 SV=2	1	hf1_eb_18273_82_20032023.ScanId;v=1;d1=21002.21002.2	controllerType=0 controllerNumber=1 scan=21002	49.3058
29798:2	1	N.FS[+79.966]YEVLTPLK.W		S[+80]	638.815	2	1276.62	1276.62	0	-0.4	31	NRagged	224.32	224.32	224.32	3.93	1125	>sp|P02817|AMELX_BOVIN Amelogenin, X isoform OS=Bos taurus OX=9913 GN=AMELX PE=1 SV=2	1	hf1_eb_18273_82_20032023.ScanId;v=1;d1=24640.24640.3	controllerType=0 controllerNumber=1 scan=24640	55.8808
30836:2	1	N.FS[+79.966]YEVLTPLK.W		S[+80]	638.815	2	1276.62	1276.62	0	-0.3	31	NRagged	288.44	288.44	288.44	6.13	1125	>sp|P02817|AMELX_BOVIN Amelogenin, X isoform OS=Bos taurus OX=9913 GN=AMELX PE=1 SV=2	1	hf1_eb_18273_82_20032023.ScanId;v=1;d1=25392.25392.2	controllerType=0 controllerNumber=1 scan=25392	57.2473
24538:2	1	N.FS[+79.966]YEVLTPLK.W		S[+80]	638.814	2	1276.62	1276.62	0	-0.7	31	NRagged	348.02	305.18	305.18	5.97	1125	>sp|P02817|AMELX_BOVIN Amelogenin, X isoform OS=Bos taurus OX=9913 GN=AMELX PE=1 SV=2	1	hf1_eb_18273_82_20032023.ScanId;v=1;d1=20974.20974.2	controllerType=0 controllerNumber=1 scan=20974	49.2555
28568:2	1	N.FS[+79.966]YEVLTPLK.W		S[+80]	638.815	2	1276.62	1276.62	0	-0.2	31	NRagged	386.55	293.34	293.34	6.12	1125	>sp|P02817|AMELX_BOVIN Amelogenin, X isoform OS=Bos taurus OX=9913 GN=AMELX PE=1 SV=2	1	hf1_eb_18273_82_20032023.ScanId;v=1;d1=23775.23775.2	controllerType=0 controllerNumber=1 scan=23775	54.319
[truncated: 2,401 more rows]

## Sheet: Proteins
Protein Rank	Description	|Log Prob|	Best |Log Prob|	Best score	Total Intensity	# of spectra	# of unique peptides	# of mod peptides	Coverage %	# AA's in protein	Protein DB number
[truncated: 4 more rows]
