# Supplementary material for: A Peptidomics Method for Assessing Sex from Modern and Ancient Bovine Tooth Enamel.
Source: Research Square preprint supplement (doi:10.21203/rs.3.rs-3766361/v1), 2024-01-29
Supplement: Supplementary file 10 [file f37f3b56c664de6a2504d4e4.xlsx]

## Sheet: Summary
Summary:
	1) Input data file: H:\Proteomics\Projects\Boaretto\INCPM_10472\Raw_files\HF1_10472_EBO_26_1_261219.raw
	2) Protein database: H:\Proteomics\Projects\Boaretto\INCPM_18273\AMELs Cattle fasta Pau 2.Fasta
	3) Parameter file: D:\Boaretto\HF1_10472_EBO_26_1_261219.raw_20230417_Amel\objs\params.prf
	4) Date/Time: April 18, 2023 3:12:57 AM IDT
	5) RunTime: 3 hours, 32 minutes, 50 seconds; on 34 cores
Summary Statistics:
	1) Reporting 2 forward and 2 reverse proteins
	2) 1441 unique forward peptides
	3) 3184 spectra matched to forward peptides
	4) Estimated spectrum-level FDR on true proteins is 0.3%
Recorded protein search configuration:
Num	Rule	Value
0	Protein database	H:\Proteomics\Projects\Boaretto\INCPM_18273\AMELs Cattle fasta Pau 2.Fasta
1	Spectrum-level FDR	Auto cut
2	Cleavage residues	KR
3	Digest cutter	C-terminal cutter
4	Peptide termini	Non specific
5	Maximum number of missed cleavages	Any missed cleavages (-1)
6	Precursor tolerance	10.0 ppm
7	Fragment tolerance	frag:qtof_hcd 20.0 ppm
8	Fragment tolerance version	2
9	Charges applied to charge-unassigned spectra:	1,2,3
10	Precursor mass max	7500.0
11	N-glycan search	None
12	O-glycan search	None
13	Off by x isotopes	-2,-1,0,+1,+2
14	Contaminants added	false
15	Decoys added	true
16	%Additional parameters:
17	Disulfide Enable	false
18	Trisulfide Enable	false
19	DSS Crosslink Enable	false
20	Custom Crosslink Enable	false
21	Wildcard Enable	0
22	Combyne cut off score	Auto
23	Protein FDR cutoff	1%
24	Focused DB created	true
25	Export mzIdentML	true
26	Score version	2
27	precursor_assignment_flags	2
28	po_NumberMonosReturn	2
29	Lock mass list	None
30	do_quick_rejects	0
31	%Modification searches:
32	common_modifications_max	2
33	rare_modifications_max	2
34	%Fixed and variable modifications:
35	Oxidation / +15.994915 @ F, H, K, M, P, W, Y | common2
36	Deamidated / +0.984016 @ N, Q, R | common2
37	Acetyl / +42.010565 @ Protein NTerm | rare1
38	Dioxidation / +31.989829 @ F, M, P, W, Y | rare2
39	Gln->pyro-Glu / -17.026549 @ Protein NTerm Q | rare1
40	Glu->pyro-Glu / -18.010565 @ Protein NTerm E | rare1
41	Phospho / +79.966331 @ S | rare1
42	% Custom modification text below
43	%Glycan modifications:
44	% Custom modification text below
45	Show all N-glycopeptides	0
46	%Addition parameters:
47	Product Version	PMI-Byonic-Com:v4.6.1
48	Registered to	david Morgenstern G-INCPM

## Sheet: Spectra
Query #:z	Protein Rank	Peptide < ProteinMetrics Confidential >	Glycans NHFAGNa	Modification Type(s)	Observed m/z	z	Observed (M+H)	Calc. mass (M+H)	Off-by-x error	Mass error (ppm)	Starting position	Cleavage	Score	Delta	Delta Mod	|Log Prob|	# of unique peptides	Protein Name	Protein DB number	Comment	Scan #	Scan Time
28594:6	1	T.WILFACLLGAAFSMPLPPHPGHPGYINFS[+79.966]YEVLTPLK.W		S[+80]	697.019	6	4177.08	4177.09	0	-1.9	4	NRagged	174.92	99.25	98.15	2.16	1206	>sp|P02817|AMELX_BOVIN Amelogenin, X isoform OS=Bos taurus OX=9913 GN=AMELX PE=1 SV=2	1	hf1_10472_ebo_26_1_261219.ScanId;v=1;d1=21592.21592.4	controllerType=0 controllerNumber=1 scan=21592	46.6504
29004:5	1	I.LF[+31.990]ACLLGAAFSMPLPPHPGHPGYINFS[+79.966]YEVLTPLK.W		F[+32], S[+80]	782.794	5	3909.94	3909.91	0	6.5	6	NRagged	241.33	30.71	30.71	2.82	1206	>sp|P02817|AMELX_BOVIN Amelogenin, X isoform OS=Bos taurus OX=9913 GN=AMELX PE=1 SV=2	1	hf1_10472_ebo_26_1_261219.ScanId;v=1;d1=21873.21873.5	controllerType=0 controllerNumber=1 scan=21873	47.1376
22788:3	1	F.ACLLGAAFSMPLPPHPGHPGYINF.S			836.416	3	2507.23	2507.24	0	-1.3	8	Non	403.37	399.14	399.14	5.22	1206	>sp|P02817|AMELX_BOVIN Amelogenin, X isoform OS=Bos taurus OX=9913 GN=AMELX PE=1 SV=2	1	hf1_10472_ebo_26_1_261219.ScanId;v=1;d1=17666.17666.2	controllerType=0 controllerNumber=1 scan=17666	39.8296
29669:3	1	A.FSMPLPPHPGHPGYINFS[+79.966]YEVLTPLK.W		S[+80]	1006.82	3	3018.44	3018.46	0	-7	15	NRagged	430.5	373.48	295.31	6.18	1206	>sp|P02817|AMELX_BOVIN Amelogenin, X isoform OS=Bos taurus OX=9913 GN=AMELX PE=1 SV=2	1	hf1_10472_ebo_26_1_261219.ScanId;v=1;d1=22326.22326.2	controllerType=0 controllerNumber=1 scan=22326	47.932
31216:4	1	A.FSM[+31.990]PLP[+31.990]PHPGHPGYINFSYEVLTPLK.W		M[+32], P[+32]	751.367	4	3002.45	3002.48	0	-9.1	15	NRagged	201.95	4.45	4.45	2.17	1206	>sp|P02817|AMELX_BOVIN Amelogenin, X isoform OS=Bos taurus OX=9913 GN=AMELX PE=1 SV=2	1	hf1_10472_ebo_26_1_261219.ScanId;v=1;d1=23379.23379.2	controllerType=0 controllerNumber=1 scan=23379	49.7798
19674:3	1	F.SM[+15.995]PLPPHPGHPGYINF.S		M[+16]	592.96	3	1776.87	1776.85	0	7.7	16	Non	178.76	113.36	35.35	1.64	1206	>sp|P02817|AMELX_BOVIN Amelogenin, X isoform OS=Bos taurus OX=9913 GN=AMELX PE=1 SV=2	1	hf1_10472_ebo_26_1_261219.ScanId;v=1;d1=15559.15559.3	controllerType=0 controllerNumber=1 scan=15559	36.181
31464:3	1	F.SM[+15.995]PLPPHPGHPGYINFS[+79.966]YEVLTPL.K		M[+16], S[+80]	920.442	3	2759.31	2759.29	0	6.1	16	Non	283.84	283.84	17.71	4.71	1206	>sp|P02817|AMELX_BOVIN Amelogenin, X isoform OS=Bos taurus OX=9913 GN=AMELX PE=1 SV=2	1	hf1_10472_ebo_26_1_261219.ScanId;v=1;d1=23543.23543.3	controllerType=0 controllerNumber=1 scan=23543	50.0686
31590:3	1	F.SMPLPPHPGHPGY[+15.995]INF[+31.990]SY[+31.990]EVLTPL.K		F[+32], Y[+16][+32]	915.11	3	2743.32	2743.31	0	3.2	16	Non	175.33	175.33	0.92	2.37	1206	>sp|P02817|AMELX_BOVIN Amelogenin, X isoform OS=Bos taurus OX=9913 GN=AMELX PE=1 SV=2	1	hf1_10472_ebo_26_1_261219.ScanId;v=1;d1=23621.23621.3	controllerType=0 controllerNumber=1 scan=23621	50.2042
27701:4	1	F.SMPLPPHPGHPGYINFS[+79.966]YEVLTPLK.W		S[+80]	718.608	4	2871.41	2871.39	0	5.7	16	NRagged	145.39	145.39	84.46	2.65	1206	>sp|P02817|AMELX_BOVIN Amelogenin, X isoform OS=Bos taurus OX=9913 GN=AMELX PE=1 SV=2	1	hf1_10472_ebo_26_1_261219.ScanId;v=1;d1=20982.20982.4	controllerType=0 controllerNumber=1 scan=20982	45.5835
23509:5	1	F.SMP[+31.990]LPPHPGHPGYINFSYEVLTPLK.W		P[+32]	565.49	5	2823.42	2823.42	0	1.8	16	NRagged	207.47	207.47	0	2.6	1206	>sp|P02817|AMELX_BOVIN Amelogenin, X isoform OS=Bos taurus OX=9913 GN=AMELX PE=1 SV=2	1	hf1_10472_ebo_26_1_261219.ScanId;v=1;d1=18131.18131.2	controllerType=0 controllerNumber=1 scan=18131	40.6401
23374:5	1	F.SMP[+31.990]LPPHPGHPGYINFSYEVLTPLK.W		P[+32]	565.49	5	2823.42	2823.42	0	0.4	16	NRagged	238.14	238.14	0	2.67	1206	>sp|P02817|AMELX_BOVIN Amelogenin, X isoform OS=Bos taurus OX=9913 GN=AMELX PE=1 SV=2	1	hf1_10472_ebo_26_1_261219.ScanId;v=1;d1=18046.18046.3	controllerType=0 controllerNumber=1 scan=18046	40.4914
29472:4	1	F.SMPLPPHPGHPGYINFS[+79.966]YEVLTPLK.W		S[+80]	718.61	4	2871.42	2871.39	0	8.5	16	NRagged	255.86	255.86	124.94	5.08	1206	>sp|P02817|AMELX_BOVIN Amelogenin, X isoform OS=Bos taurus OX=9913 GN=AMELX PE=1 SV=2	1	hf1_10472_ebo_26_1_261219.ScanId;v=1;d1=22190.22190.4	controllerType=0 controllerNumber=1 scan=22190	47.6915
29527:3	1	F.SMPLPPHPGHPGYINFS[+79.966]YEVLTPLK.W		S[+80]	957.811	3	2871.42	2871.39	0	8.3	16	NRagged	517.46	517.46	182.95	7.61	1206	>sp|P02817|AMELX_BOVIN Amelogenin, X isoform OS=Bos taurus OX=9913 GN=AMELX PE=1 SV=2	1	hf1_10472_ebo_26_1_261219.ScanId;v=1;d1=22224.22224.3	controllerType=0 controllerNumber=1 scan=22224	47.7509
29517:3	1	F.SMPLPPHPGHPGYINFS[+79.966]YEVLTPLK.W		S[+80]	957.811	3	2871.42	2871.39	0	8.3	16	NRagged	598.3	598.3	241.98	8.52	1206	>sp|P02817|AMELX_BOVIN Amelogenin, X isoform OS=Bos taurus OX=9913 GN=AMELX PE=1 SV=2	1	hf1_10472_ebo_26_1_261219.ScanId;v=1;d1=22219.22219.3	controllerType=0 controllerNumber=1 scan=22219	47.7433
28918:3	1	F.SMPLPPHPGHPGYINFS[+79.966]YEVLTPLK.W		S[+80]	957.81	3	2871.41	2871.39	0	7.1	16	NRagged	606.32	606.32	261.73	9.84	1206	>sp|P02817|AMELX_BOVIN Amelogenin, X isoform OS=Bos taurus OX=9913 GN=AMELX PE=1 SV=2	1	hf1_10472_ebo_26_1_261219.ScanId;v=1;d1=21813.21813.3	controllerType=0 controllerNumber=1 scan=21813	47.0345
29218:3	1	F.SMPLPPHPGHPGYINFS[+79.966]YEVLTPLK.W		S[+80]	957.809	3	2871.41	2871.39	0	6.2	16	NRagged	773.8	773.8	317.73	12.84	1206	>sp|P02817|AMELX_BOVIN Amelogenin, X isoform OS=Bos taurus OX=9913 GN=AMELX PE=1 SV=2	1	hf1_10472_ebo_26_1_261219.ScanId;v=1;d1=22020.22020.3	controllerType=0 controllerNumber=1 scan=22020	47.3949
28211:4	1	F.SM[+31.990]PLPPHPGHPGYINFS[+79.966]YEVLTPLK.W		M[+32], S[+80]	726.607	4	2903.41	2903.38	0	7.6	16	NRagged	96.14	96.14	0	2.49	1206	>sp|P02817|AMELX_BOVIN Amelogenin, X isoform OS=Bos taurus OX=9913 GN=AMELX PE=1 SV=2	1	hf1_10472_ebo_26_1_261219.ScanId;v=1;d1=21332.21332.6	controllerType=0 controllerNumber=1 scan=21332	46.1942
27297:4	1	F.SM[+15.995]PLPPHPGHPGYINFS[+79.966]YEVLTPLK.W		M[+16], S[+80]	722.606	4	2887.4	2887.39	0	4.4	16	NRagged	558.54	558.54	81.36	8.02	1206	>sp|P02817|AMELX_BOVIN Amelogenin, X isoform OS=Bos taurus OX=9913 GN=AMELX PE=1 SV=2	1	hf1_10472_ebo_26_1_261219.ScanId;v=1;d1=20696.20696.4	controllerType=0 controllerNumber=1 scan=20696	45.0816
27234:3	1	F.SM[+15.995]PLPPHPGHPGYINFS[+79.966]YEVLTPLK.W		M[+16], S[+80]	963.143	3	2887.41	2887.39	0	8.5	16	NRagged	613.75	613.75	218.96	9.52	1206	>sp|P02817|AMELX_BOVIN Amelogenin, X isoform OS=Bos taurus OX=9913 GN=AMELX PE=1 SV=2	1	hf1_10472_ebo_26_1_261219.ScanId;v=1;d1=20647.20647.3	controllerType=0 controllerNumber=1 scan=20647	44.9974
29729:4	1	F.SMPLPPHPGHP[+15.995]GYIN[+0.984]F[+31.990]SYEVLTPLK.W		F[+32], N[+1], P[+16]	710.856	4	2840.4	2840.4	0	2.8	16	NRagged	125.89	125.89	0	2.4	1206	>sp|P02817|AMELX_BOVIN Amelogenin, X isoform OS=Bos taurus OX=9913 GN=AMELX PE=1 SV=2	1	hf1_10472_ebo_26_1_261219.ScanId;v=1;d1=22365.22365.4	controllerType=0 controllerNumber=1 scan=22365	47.998
28214:3	1	F.SM[+15.995]PLPPHPGHPGYIN[+0.984]FS[+79.966]YEVLTPLK.W		M[+16], N[+1], S[+80]	963.471	3	2888.4	2888.37	0	9.1	16	NRagged	402.65	402.65	136.15	7.51	1206	>sp|P02817|AMELX_BOVIN Amelogenin, X isoform OS=Bos taurus OX=9913 GN=AMELX PE=1 SV=2	1	hf1_10472_ebo_26_1_261219.ScanId;v=1;d1=21333.21333.3	controllerType=0 controllerNumber=1 scan=21333	46.1957
35350:3	1	F.SMPLPPHPGHPGYINFS[+79.966]YEVLTPLKWY.Q		S[+80]	1074.19	3	3220.56	3220.54	0	6.7	16	Non	214.3	214.3	20.6	3.92	1206	>sp|P02817|AMELX_BOVIN Amelogenin, X isoform OS=Bos taurus OX=9913 GN=AMELX PE=1 SV=2	1	hf1_10472_ebo_26_1_261219.ScanId;v=1;d1=26148.26148.4	controllerType=0 controllerNumber=1 scan=26148	54.7053
35345:4	1	F.SMPLPPHPGHP[+31.990]GYINF[+31.990]SY[+15.995]EVLTPLKWY.Q		F[+32], P[+32], Y[+16]	805.896	4	3220.56	3220.54	0	4.9	16	Non	91.82	91.82	1.5	2.19	1206	>sp|P02817|AMELX_BOVIN Amelogenin, X isoform OS=Bos taurus OX=9913 GN=AMELX PE=1 SV=2	1	hf1_10472_ebo_26_1_261219.ScanId;v=1;d1=26145.26145.4	controllerType=0 controllerNumber=1 scan=26145	54.7008
16154:2	1	S.MPLPPHP.G			394.712	2	788.418	788.412	0	6.6	17	Non	283.76	126.3	126.3	2.44	1206	>sp|P02817|AMELX_BOVIN Amelogenin, X isoform OS=Bos taurus OX=9913 GN=AMELX PE=1 SV=2	1	hf1_10472_ebo_26_1_261219.ScanId;v=1;d1=13161.13161.2	controllerType=0 controllerNumber=1 scan=13161	32.0488
14013:2	1	S.MPLPPHP.G			394.712	2	788.416	788.412	0	4.6	17	Non	361.94	219	219	3.43	1206	>sp|P02817|AMELX_BOVIN Amelogenin, X isoform OS=Bos taurus OX=9913 GN=AMELX PE=1 SV=2	1	hf1_10472_ebo_26_1_261219.ScanId;v=1;d1=11696.11696.2	controllerType=0 controllerNumber=1 scan=11696	29.5123
14621:2	1	S.MPLPPHP.G			394.712	2	788.417	788.412	0	5.9	17	Non	385.12	194.2	194.2	3.17	1206	>sp|P02817|AMELX_BOVIN Amelogenin, X isoform OS=Bos taurus OX=9913 GN=AMELX PE=1 SV=2	1	hf1_10472_ebo_26_1_261219.ScanId;v=1;d1=12094.12094.2	controllerType=0 controllerNumber=1 scan=12094	30.207
14923:2	1	S.MPLPPHP.G			394.712	2	788.417	788.412	0	5.6	17	Non	420.76	231.26	231.26	3.65	1206	>sp|P02817|AMELX_BOVIN Amelogenin, X isoform OS=Bos taurus OX=9913 GN=AMELX PE=1 SV=2	1	hf1_10472_ebo_26_1_261219.ScanId;v=1;d1=12292.12292.2	controllerType=0 controllerNumber=1 scan=12292	30.5492
14312:2	1	S.MPLPPHP.G			394.712	2	788.416	788.412	0	5	17	Non	421.84	257.5	257.5	3.82	1206	>sp|P02817|AMELX_BOVIN Amelogenin, X isoform OS=Bos taurus OX=9913 GN=AMELX PE=1 SV=2	1	hf1_10472_ebo_26_1_261219.ScanId;v=1;d1=11893.11893.2	controllerType=0 controllerNumber=1 scan=11893	29.8569
08268:2	1	S.M[+15.995]PLPPHP.G		M[+16]	402.709	2	804.412	804.407	0	5.5	17	Non	245.58	157.85	19.54	2.27	1206	>sp|P02817|AMELX_BOVIN Amelogenin, X isoform OS=Bos taurus OX=9913 GN=AMELX PE=1 SV=2	1	hf1_10472_ebo_26_1_261219.ScanId;v=1;d1=7825.7825.2	controllerType=0 controllerNumber=1 scan=7825	22.7372
10773:2	1	S.M[+15.995]PLPPHP.G		M[+16]	402.71	2	804.412	804.407	0	5.8	17	Non	265.14	127.13	67.51	2.27	1206	>sp|P02817|AMELX_BOVIN Amelogenin, X isoform OS=Bos taurus OX=9913 GN=AMELX PE=1 SV=2	1	hf1_10472_ebo_26_1_261219.ScanId;v=1;d1=9510.9510.2	controllerType=0 controllerNumber=1 scan=9510	25.6749
10336:2	1	S.M[+15.995]PLPPHP.G		M[+16]	402.71	2	804.412	804.407	0	6.3	17	Non	372.85	198.26	73.66	3.12	1206	>sp|P02817|AMELX_BOVIN Amelogenin, X isoform OS=Bos taurus OX=9913 GN=AMELX PE=1 SV=2	1	hf1_10472_ebo_26_1_261219.ScanId;v=1;d1=9221.9221.2	controllerType=0 controllerNumber=1 scan=9221	25.1737
10043:2	1	S.M[+15.995]PLPPHP.G		M[+16]	402.71	2	804.412	804.407	0	5.8	17	Non	428.05	249.69	83.58	3.62	1206	>sp|P02817|AMELX_BOVIN Amelogenin, X isoform OS=Bos taurus OX=9913 GN=AMELX PE=1 SV=2	1	hf1_10472_ebo_26_1_261219.ScanId;v=1;d1=9019.9019.2	controllerType=0 controllerNumber=1 scan=9019	24.8226
09145:2	1	S.M[+15.995]PLPPHP.G		M[+16]	402.71	2	804.413	804.407	0	7.1	17	Non	434.55	277.81	88.17	3.86	1206	>sp|P02817|AMELX_BOVIN Amelogenin, X isoform OS=Bos taurus OX=9913 GN=AMELX PE=1 SV=2	1	hf1_10472_ebo_26_1_261219.ScanId;v=1;d1=8426.8426.2	controllerType=0 controllerNumber=1 scan=8426	23.7871
08569:2	1	S.M[+15.995]PLPPHP.G		M[+16]	402.71	2	804.412	804.407	0	6.4	17	Non	434.85	287.55	98.07	3.99	1206	>sp|P02817|AMELX_BOVIN Amelogenin, X isoform OS=Bos taurus OX=9913 GN=AMELX PE=1 SV=2	1	hf1_10472_ebo_26_1_261219.ScanId;v=1;d1=8029.8029.2	controllerType=0 controllerNumber=1 scan=8029	23.0945
09449:2	1	S.M[+15.995]PLPPHP.G		M[+16]	402.71	2	804.413	804.407	0	6.6	17	Non	441.33	259.24	96.72	3.72	1206	>sp|P02817|AMELX_BOVIN Amelogenin, X isoform OS=Bos taurus OX=9913 GN=AMELX PE=1 SV=2	1	hf1_10472_ebo_26_1_261219.ScanId;v=1;d1=8624.8624.2	controllerType=0 controllerNumber=1 scan=8624	24.1346
08861:2	1	S.M[+15.995]PLPPHP.G		M[+16]	402.71	2	804.413	804.407	0	7	17	Non	451.96	296.99	95.02	4.05	1206	>sp|P02817|AMELX_BOVIN Amelogenin, X isoform OS=Bos taurus OX=9913 GN=AMELX PE=1 SV=2	1	hf1_10472_ebo_26_1_261219.ScanId;v=1;d1=8227.8227.2	controllerType=0 controllerNumber=1 scan=8227	23.4391
09748:2	1	S.M[+15.995]PLPPHP.G		M[+16]	402.71	2	804.412	804.407	0	5.7	17	Non	452.75	296.34	90.8	4.01	1206	>sp|P02817|AMELX_BOVIN Amelogenin, X isoform OS=Bos taurus OX=9913 GN=AMELX PE=1 SV=2	1	hf1_10472_ebo_26_1_261219.ScanId;v=1;d1=8821.8821.2	controllerType=0 controllerNumber=1 scan=8821	24.4788
13045:1	1	S.MPLPPHPG.H			845.438	1	845.438	845.434	0	5.1	17	Non	264.51	228.36	228.36	2.94	1206	>sp|P02817|AMELX_BOVIN Amelogenin, X isoform OS=Bos taurus OX=9913 GN=AMELX PE=1 SV=2	1	hf1_10472_ebo_26_1_261219.ScanId;v=1;d1=11048.11048.2	controllerType=0 controllerNumber=1 scan=11048	28.3746
13646:1	1	S.MPLPPHPG.H			845.44	1	845.44	845.434	0	7	17	Non	281.06	246.82	246.82	3.49	1206	>sp|P02817|AMELX_BOVIN Amelogenin, X isoform OS=Bos taurus OX=9913 GN=AMELX PE=1 SV=2	1	hf1_10472_ebo_26_1_261219.ScanId;v=1;d1=11445.11445.2	controllerType=0 controllerNumber=1 scan=11445	29.0726
14919:2	1	S.MPLPPHPG.H			423.223	2	845.439	845.434	0	6.4	17	Non	333.72	333.72	333.72	3.84	1206	>sp|P02817|AMELX_BOVIN Amelogenin, X isoform OS=Bos taurus OX=9913 GN=AMELX PE=1 SV=2	1	hf1_10472_ebo_26_1_261219.ScanId;v=1;d1=12289.12289.2	controllerType=0 controllerNumber=1 scan=12289	30.542
13342:1	1	S.MPLPPHPG.H			845.439	1	845.439	845.434	0	6.6	17	Non	347.21	315.46	315.46	3.69	1206	>sp|P02817|AMELX_BOVIN Amelogenin, X isoform OS=Bos taurus OX=9913 GN=AMELX PE=1 SV=2	1	hf1_10472_ebo_26_1_261219.ScanId;v=1;d1=11243.11243.2	controllerType=0 controllerNumber=1 scan=11243	28.7192
13923:2	1	S.MPLPPHPG.H			423.223	2	845.439	845.434	0	5.6	17	Non	390.27	338.94	338.94	4.05	1206	>sp|P02817|AMELX_BOVIN Amelogenin, X isoform OS=Bos taurus OX=9913 GN=AMELX PE=1 SV=2	1	hf1_10472_ebo_26_1_261219.ScanId;v=1;d1=11635.11635.2	controllerType=0 controllerNumber=1 scan=11635	29.4046
14212:2	1	S.MPLPPHPG.H			423.223	2	845.438	845.434	0	4.8	17	Non	396.87	396.87	396.87	5.03	1206	>sp|P02817|AMELX_BOVIN Amelogenin, X isoform OS=Bos taurus OX=9913 GN=AMELX PE=1 SV=2	1	hf1_10472_ebo_26_1_261219.ScanId;v=1;d1=11827.11827.2	controllerType=0 controllerNumber=1 scan=11827	29.743
13628:2	1	S.MPLPPHPG.H			423.223	2	845.439	845.434	0	6.1	17	Non	399.86	383.1	383.1	4.91	1206	>sp|P02817|AMELX_BOVIN Amelogenin, X isoform OS=Bos taurus OX=9913 GN=AMELX PE=1 SV=2	1	hf1_10472_ebo_26_1_261219.ScanId;v=1;d1=11432.11432.2	controllerType=0 controllerNumber=1 scan=11432	29.0506
13322:2	1	S.MPLPPHPG.H			423.223	2	845.439	845.434	0	6.4	17	Non	402.31	372.28	372.28	5.09	1206	>sp|P02817|AMELX_BOVIN Amelogenin, X isoform OS=Bos taurus OX=9913 GN=AMELX PE=1 SV=2	1	hf1_10472_ebo_26_1_261219.ScanId;v=1;d1=11229.11229.2	controllerType=0 controllerNumber=1 scan=11229	28.6958
13015:2	1	S.MPLPPHPG.H			423.223	2	845.439	845.434	0	5.8	17	Non	411.91	335.46	335.46	4.06	1206	>sp|P02817|AMELX_BOVIN Amelogenin, X isoform OS=Bos taurus OX=9913 GN=AMELX PE=1 SV=2	1	hf1_10472_ebo_26_1_261219.ScanId;v=1;d1=11028.11028.2	controllerType=0 controllerNumber=1 scan=11028	28.3397
14521:2	1	S.MPLPPHPG.H			423.223	2	845.439	845.434	0	5.9	17	Non	435.51	328.14	328.14	4.06	1206	>sp|P02817|AMELX_BOVIN Amelogenin, X isoform OS=Bos taurus OX=9913 GN=AMELX PE=1 SV=2	1	hf1_10472_ebo_26_1_261219.ScanId;v=1;d1=12028.12028.2	controllerType=0 controllerNumber=1 scan=12028	30.0933
10294:2	1	S.M[+15.995]PLPPHPG.H		M[+16]	431.221	2	861.434	861.429	0	6.5	17	Non	289.67	279.47	67.06	3.52	1206	>sp|P02817|AMELX_BOVIN Amelogenin, X isoform OS=Bos taurus OX=9913 GN=AMELX PE=1 SV=2	1	hf1_10472_ebo_26_1_261219.ScanId;v=1;d1=9192.9192.2	controllerType=0 controllerNumber=1 scan=9192	25.1232
09566:2	1	S.M[+15.995]PLPPHPG.H		M[+16]	431.221	2	861.434	861.429	0	6.6	17	Non	417.1	292.81	80.79	3.79	1206	>sp|P02817|AMELX_BOVIN Amelogenin, X isoform OS=Bos taurus OX=9913 GN=AMELX PE=1 SV=2	1	hf1_10472_ebo_26_1_261219.ScanId;v=1;d1=8700.8700.2	controllerType=0 controllerNumber=1 scan=8700	24.2674
09263:2	1	S.M[+15.995]PLPPHPG.H		M[+16]	431.222	2	861.436	861.429	0	8.3	17	Non	431.61	371.33	93.64	4.66	1206	>sp|P02817|AMELX_BOVIN Amelogenin, X isoform OS=Bos taurus OX=9913 GN=AMELX PE=1 SV=2	1	hf1_10472_ebo_26_1_261219.ScanId;v=1;d1=8502.8502.2	controllerType=0 controllerNumber=1 scan=8502	23.9211
08976:2	1	S.M[+15.995]PLPPHPG.H		M[+16]	431.221	2	861.435	861.429	0	6.8	17	Non	433.17	352.12	96.02	4.22	1206	>sp|P02817|AMELX_BOVIN Amelogenin, X isoform OS=Bos taurus OX=9913 GN=AMELX PE=1 SV=2	1	hf1_10472_ebo_26_1_261219.ScanId;v=1;d1=8304.8304.2	controllerType=0 controllerNumber=1 scan=8304	23.574
08107:2	1	S.M[+15.995]PLPPHPG.H		M[+16]	431.22	2	861.433	861.429	0	5.6	17	Non	436.19	358.59	95.81	4.06	1206	>sp|P02817|AMELX_BOVIN Amelogenin, X isoform OS=Bos taurus OX=9913 GN=AMELX PE=1 SV=2	1	hf1_10472_ebo_26_1_261219.ScanId;v=1;d1=7710.7710.2	controllerType=0 controllerNumber=1 scan=7710	22.5385
08677:2	1	S.M[+15.995]PLPPHPG.H		M[+16]	431.221	2	861.434	861.429	0	6.3	17	Non	441.31	371.83	101.73	5.04	1206	>sp|P02817|AMELX_BOVIN Amelogenin, X isoform OS=Bos taurus OX=9913 GN=AMELX PE=1 SV=2	1	hf1_10472_ebo_26_1_261219.ScanId;v=1;d1=8106.8106.2	controllerType=0 controllerNumber=1 scan=8106	23.2279
07818:2	1	S.M[+15.995]PLPPHPG.H		M[+16]	431.221	2	861.435	861.429	0	6.8	17	Non	441.36	369.8	101.21	5.04	1206	>sp|P02817|AMELX_BOVIN Amelogenin, X isoform OS=Bos taurus OX=9913 GN=AMELX PE=1 SV=2	1	hf1_10472_ebo_26_1_261219.ScanId;v=1;d1=7512.7512.2	controllerType=0 controllerNumber=1 scan=7512	22.1953
08384:2	1	S.M[+15.995]PLPPHPG.H		M[+16]	431.221	2	861.434	861.429	0	6	17	Non	446.17	373.58	101.31	5.11	1206	>sp|P02817|AMELX_BOVIN Amelogenin, X isoform OS=Bos taurus OX=9913 GN=AMELX PE=1 SV=2	1	hf1_10472_ebo_26_1_261219.ScanId;v=1;d1=7908.7908.2	controllerType=0 controllerNumber=1 scan=7908	22.884
11006:2	1	S.MPLPPHPGH.P			491.752	2	982.497	982.493	0	4.8	17	Non	353.69	321.89	321.89	4.13	1206	>sp|P02817|AMELX_BOVIN Amelogenin, X isoform OS=Bos taurus OX=9913 GN=AMELX PE=1 SV=2	1	hf1_10472_ebo_26_1_261219.ScanId;v=1;d1=9680.9680.2	controllerType=0 controllerNumber=1 scan=9680	25.9754
10420:2	1	S.MPLPPHPGH.P			491.753	2	982.498	982.493	0	5.3	17	Non	509.95	419.74	419.74	5.37	1206	>sp|P02817|AMELX_BOVIN Amelogenin, X isoform OS=Bos taurus OX=9913 GN=AMELX PE=1 SV=2	1	hf1_10472_ebo_26_1_261219.ScanId;v=1;d1=9275.9275.2	controllerType=0 controllerNumber=1 scan=9275	25.2672
10713:2	1	S.MPLPPHPGH.P			491.753	2	982.499	982.493	0	5.9	17	Non	512.54	477.07	477.07	5.49	1206	>sp|P02817|AMELX_BOVIN Amelogenin, X isoform OS=Bos taurus OX=9913 GN=AMELX PE=1 SV=2	1	hf1_10472_ebo_26_1_261219.ScanId;v=1;d1=9474.9474.2	controllerType=0 controllerNumber=1 scan=9474	25.6132
09465:2	1	S.MPLPPHPGH.P			491.753	2	982.499	982.493	0	6.5	17	Non	552.38	438.5	438.5	6.34	1206	>sp|P02817|AMELX_BOVIN Amelogenin, X isoform OS=Bos taurus OX=9913 GN=AMELX PE=1 SV=2	1	hf1_10472_ebo_26_1_261219.ScanId;v=1;d1=8634.8634.2	controllerType=0 controllerNumber=1 scan=8634	24.1525
09828:2	1	S.MPLPPHPGH.P			491.753	2	982.498	982.493	0	5.5	17	Non	569.78	463.52	463.52	7.11	1206	>sp|P02817|AMELX_BOVIN Amelogenin, X isoform OS=Bos taurus OX=9913 GN=AMELX PE=1 SV=2	1	hf1_10472_ebo_26_1_261219.ScanId;v=1;d1=8873.8873.2	controllerType=0 controllerNumber=1 scan=8873	24.5687
10120:2	1	S.MPLPPHPGH.P			491.753	2	982.498	982.493	0	5.7	17	Non	588.46	502.99	502.99	7.11	1206	>sp|P02817|AMELX_BOVIN Amelogenin, X isoform OS=Bos taurus OX=9913 GN=AMELX PE=1 SV=2	1	hf1_10472_ebo_26_1_261219.ScanId;v=1;d1=9074.9074.2	controllerType=0 controllerNumber=1 scan=9074	24.9176
06002:2	1	S.M[+15.995]PLPPHPGH.P		M[+16]	499.751	2	998.494	998.488	0	6.8	17	Non	311.22	311.22	65.52	4.08	1206	>sp|P02817|AMELX_BOVIN Amelogenin, X isoform OS=Bos taurus OX=9913 GN=AMELX PE=1 SV=2	1	hf1_10472_ebo_26_1_261219.ScanId;v=1;d1=6292.6292.2	controllerType=0 controllerNumber=1 scan=6292	20.0645
06439:2	1	S.M[+15.995]PLPPHPGH.P		M[+16]	499.751	2	998.494	998.488	0	6.4	17	Non	313.96	313.96	74.22	3.98	1206	>sp|P02817|AMELX_BOVIN Amelogenin, X isoform OS=Bos taurus OX=9913 GN=AMELX PE=1 SV=2	1	hf1_10472_ebo_26_1_261219.ScanId;v=1;d1=6578.6578.2	controllerType=0 controllerNumber=1 scan=6578	20.5626
05259:2	1	S.M[+15.995]PLPPHPGH.P		M[+16]	499.75	2	998.492	998.488	0	4.7	17	Non	410.43	387.6	86.47	5.07	1206	>sp|P02817|AMELX_BOVIN Amelogenin, X isoform OS=Bos taurus OX=9913 GN=AMELX PE=1 SV=2	1	hf1_10472_ebo_26_1_261219.ScanId;v=1;d1=5790.5790.2	controllerType=0 controllerNumber=1 scan=5790	19.1886
05556:2	1	S.M[+15.995]PLPPHPGH.P		M[+16]	499.751	2	998.494	998.488	0	6.4	17	Non	455.05	416.35	87.26	5.49	1206	>sp|P02817|AMELX_BOVIN Amelogenin, X isoform OS=Bos taurus OX=9913 GN=AMELX PE=1 SV=2	1	hf1_10472_ebo_26_1_261219.ScanId;v=1;d1=5991.5991.2	controllerType=0 controllerNumber=1 scan=5991	19.5406
04961:2	1	S.M[+15.995]PLPPHPGH.P		M[+16]	499.751	2	998.494	998.488	0	6.4	17	Non	476.89	425.43	96.51	5.49	1206	>sp|P02817|AMELX_BOVIN Amelogenin, X isoform OS=Bos taurus OX=9913 GN=AMELX PE=1 SV=2	1	hf1_10472_ebo_26_1_261219.ScanId;v=1;d1=5590.5590.2	controllerType=0 controllerNumber=1 scan=5590	18.8365
04661:2	1	S.M[+15.995]PLPPHPGH.P		M[+16]	499.75	2	998.493	998.488	0	5.4	17	Non	525.96	475.69	101.62	6.3	1206	>sp|P02817|AMELX_BOVIN Amelogenin, X isoform OS=Bos taurus OX=9913 GN=AMELX PE=1 SV=2	1	hf1_10472_ebo_26_1_261219.ScanId;v=1;d1=5385.5385.2	controllerType=0 controllerNumber=1 scan=5385	18.4779
12035:2	1	S.MPLPPHPGHP.G			540.28	2	1079.55	1079.55	0	6.1	17	Non	372.57	232.46	232.46	3.76	1206	>sp|P02817|AMELX_BOVIN Amelogenin, X isoform OS=Bos taurus OX=9913 GN=AMELX PE=1 SV=2	1	hf1_10472_ebo_26_1_261219.ScanId;v=1;d1=10369.10369.2	controllerType=0 controllerNumber=1 scan=10369	27.1798
10785:2	1	S.MPLPPHPGHP.G			540.278	2	1079.55	1079.55	0	3.8	17	Non	506.07	342.37	342.37	4.9	1206	>sp|P02817|AMELX_BOVIN Amelogenin, X isoform OS=Bos taurus OX=9913 GN=AMELX PE=1 SV=2	1	hf1_10472_ebo_26_1_261219.ScanId;v=1;d1=9517.9517.2	controllerType=0 controllerNumber=1 scan=9517	25.6882
11360:2	1	S.MPLPPHPGHP.G			540.279	2	1079.55	1079.55	0	5.4	17	Non	587.93	366.23	366.23	7.11	1206	>sp|P02817|AMELX_BOVIN Amelogenin, X isoform OS=Bos taurus OX=9913 GN=AMELX PE=1 SV=2	1	hf1_10472_ebo_26_1_261219.ScanId;v=1;d1=9923.9923.2	controllerType=0 controllerNumber=1 scan=9923	26.4009
11727:2	1	S.MPLPPHPGHP.G			540.279	2	1079.55	1079.55	0	5.7	17	Non	593.38	459.01	459.01	7.11	1206	>sp|P02817|AMELX_BOVIN Amelogenin, X isoform OS=Bos taurus OX=9913 GN=AMELX PE=1 SV=2	1	hf1_10472_ebo_26_1_261219.ScanId;v=1;d1=10164.10164.3	controllerType=0 controllerNumber=1 scan=10164	26.8207
11051:2	1	S.MPLPPHPGHP.G			540.279	2	1079.55	1079.55	0	5.1	17	Non	663.03	420.93	420.93	9.11	1206	>sp|P02817|AMELX_BOVIN Amelogenin, X isoform OS=Bos taurus OX=9913 GN=AMELX PE=1 SV=2	1	hf1_10472_ebo_26_1_261219.ScanId;v=1;d1=9708.9708.2	controllerType=0 controllerNumber=1 scan=9708	26.0252
06180:2	1	S.MP[+15.995]LPPHPGHP.G		P[+16]	548.279	2	1095.55	1095.54	0	9.7	17	Non	166.71	166.71	4	2.2	1206	>sp|P02817|AMELX_BOVIN Amelogenin, X isoform OS=Bos taurus OX=9913 GN=AMELX PE=1 SV=2	1	hf1_10472_ebo_26_1_261219.ScanId;v=1;d1=6406.6406.2	controllerType=0 controllerNumber=1 scan=6406	20.2615
09547:3	1	S.MPLPPHPGHPG.Y			379.53	3	1136.57	1136.57	0	6.5	17	Non	315.73	239.34	239.34	3.81	1206	>sp|P02817|AMELX_BOVIN Amelogenin, X isoform OS=Bos taurus OX=9913 GN=AMELX PE=1 SV=2	1	hf1_10472_ebo_26_1_261219.ScanId;v=1;d1=8686.8686.3	controllerType=0 controllerNumber=1 scan=8686	24.2412
46188:3	1	S.MPLPPHPGHPG.Y			379.53	3	1136.57	1136.57	0	7	17	Non	379.48	316.12	316.12	5.17	1206	>sp|P02817|AMELX_BOVIN Amelogenin, X isoform OS=Bos taurus OX=9913 GN=AMELX PE=1 SV=2	1	hf1_10472_ebo_26_1_261219.ScanId;v=1;d1=34346.34346.3	controllerType=0 controllerNumber=1 scan=34346	73.5452
09619:2	1	S.MPLPPHPGHPG.Y			568.79	2	1136.57	1136.57	0	4.8	17	Non	399.69	399.69	399.69	5.26	1206	>sp|P02817|AMELX_BOVIN Amelogenin, X isoform OS=Bos taurus OX=9913 GN=AMELX PE=1 SV=2	1	hf1_10472_ebo_26_1_261219.ScanId;v=1;d1=8737.8737.2	controllerType=0 controllerNumber=1 scan=8737	24.3308
10436:3	1	S.MPLPPHPGHPG.Y			379.529	3	1136.57	1136.57	0	5.8	17	Non	453.14	387.79	387.79	6.19	1206	>sp|P02817|AMELX_BOVIN Amelogenin, X isoform OS=Bos taurus OX=9913 GN=AMELX PE=1 SV=2	1	hf1_10472_ebo_26_1_261219.ScanId;v=1;d1=9286.9286.3	controllerType=0 controllerNumber=1 scan=9286	25.2865
10999:3	1	S.MPLPPHPGHPG.Y			379.529	3	1136.57	1136.57	0	4.4	17	Non	470.17	431.06	431.06	6.19	1206	>sp|P02817|AMELX_BOVIN Amelogenin, X isoform OS=Bos taurus OX=9913 GN=AMELX PE=1 SV=2	1	hf1_10472_ebo_26_1_261219.ScanId;v=1;d1=9675.9675.3	controllerType=0 controllerNumber=1 scan=9675	25.9679
10718:2	1	S.MPLPPHPGHPG.Y			568.79	2	1136.57	1136.57	0	5.8	17	Non	476.51	355.4	355.4	5.28	1206	>sp|P02817|AMELX_BOVIN Amelogenin, X isoform OS=Bos taurus OX=9913 GN=AMELX PE=1 SV=2	1	hf1_10472_ebo_26_1_261219.ScanId;v=1;d1=9477.9477.3	controllerType=0 controllerNumber=1 scan=9477	25.6172
09838:3	1	S.MPLPPHPGHPG.Y			379.529	3	1136.57	1136.57	0	5.9	17	Non	481.95	405.13	405.13	6.23	1206	>sp|P02817|AMELX_BOVIN Amelogenin, X isoform OS=Bos taurus OX=9913 GN=AMELX PE=1 SV=2	1	hf1_10472_ebo_26_1_261219.ScanId;v=1;d1=8880.8880.3	controllerType=0 controllerNumber=1 scan=8880	24.5819
11288:3	1	S.MPLPPHPGHPG.Y			379.529	3	1136.57	1136.57	0	4.7	17	Non	486.58	463.32	463.32	6.23	1206	>sp|P02817|AMELX_BOVIN Amelogenin, X isoform OS=Bos taurus OX=9913 GN=AMELX PE=1 SV=2	1	hf1_10472_ebo_26_1_261219.ScanId;v=1;d1=9875.9875.3	controllerType=0 controllerNumber=1 scan=9875	26.3179
10138:3	1	S.MPLPPHPGHPG.Y			379.53	3	1136.57	1136.57	0	6.5	17	Non	487.78	406.14	406.14	6.27	1206	>sp|P02817|AMELX_BOVIN Amelogenin, X isoform OS=Bos taurus OX=9913 GN=AMELX PE=1 SV=2	1	hf1_10472_ebo_26_1_261219.ScanId;v=1;d1=9085.9085.3	controllerType=0 controllerNumber=1 scan=9085	24.9369
10729:3	1	S.MPLPPHPGHPG.Y			379.529	3	1136.57	1136.57	0	5.9	17	Non	488.73	414.12	414.12	6.23	1206	>sp|P02817|AMELX_BOVIN Amelogenin, X isoform OS=Bos taurus OX=9913 GN=AMELX PE=1 SV=2	1	hf1_10472_ebo_26_1_261219.ScanId;v=1;d1=9484.9484.3	controllerType=0 controllerNumber=1 scan=9484	25.6304
10208:2	1	S.MPLPPHPGHPG.Y			568.79	2	1136.57	1136.57	0	5.5	17	Non	660.16	489.61	489.61	9.11	1206	>sp|P02817|AMELX_BOVIN Amelogenin, X isoform OS=Bos taurus OX=9913 GN=AMELX PE=1 SV=2	1	hf1_10472_ebo_26_1_261219.ScanId;v=1;d1=9132.9132.2	controllerType=0 controllerNumber=1 scan=9132	25.0208
09911:2	1	S.MPLPPHPGHPG.Y			568.79	2	1136.57	1136.57	0	5.8	17	Non	671.61	466.92	466.92	9.11	1206	>sp|P02817|AMELX_BOVIN Amelogenin, X isoform OS=Bos taurus OX=9913 GN=AMELX PE=1 SV=2	1	hf1_10472_ebo_26_1_261219.ScanId;v=1;d1=8932.8932.2	controllerType=0 controllerNumber=1 scan=8932	24.6725
08241:3	1	S.M[+15.995]PLPPHPGHPG.Y		M[+16]	384.861	3	1152.57	1152.56	0	4.4	17	Non	166.25	166.25	5.88	2.43	1206	>sp|P02817|AMELX_BOVIN Amelogenin, X isoform OS=Bos taurus OX=9913 GN=AMELX PE=1 SV=2	1	hf1_10472_ebo_26_1_261219.ScanId;v=1;d1=7805.7805.3	controllerType=0 controllerNumber=1 scan=7805	22.7018
09960:3	1	S.MPLPPH[+15.995]PGHPG.Y		H[+16]	384.861	3	1152.57	1152.56	0	5.7	17	Non	214.71	181.16	7.23	2.26	1206	>sp|P02817|AMELX_BOVIN Amelogenin, X isoform OS=Bos taurus OX=9913 GN=AMELX PE=1 SV=2	1	hf1_10472_ebo_26_1_261219.ScanId;v=1;d1=8962.8962.3	controllerType=0 controllerNumber=1 scan=8962	24.7223
09048:3	1	S.MPLPPHPGHP[+15.995]G.Y		P[+16]	384.861	3	1152.57	1152.56	0	6.8	17	Non	278.18	240.73	30.19	4.02	1206	>sp|P02817|AMELX_BOVIN Amelogenin, X isoform OS=Bos taurus OX=9913 GN=AMELX PE=1 SV=2	1	hf1_10472_ebo_26_1_261219.ScanId;v=1;d1=8355.8355.3	controllerType=0 controllerNumber=1 scan=8355	23.6619
07072:2	1	S.M[+15.995]PLPPHPGHPG.Y		M[+16]	576.788	2	1152.57	1152.56	0	6.1	17	Non	314.1	276.99	54.5	4.23	1206	>sp|P02817|AMELX_BOVIN Amelogenin, X isoform OS=Bos taurus OX=9913 GN=AMELX PE=1 SV=2	1	hf1_10472_ebo_26_1_261219.ScanId;v=1;d1=7002.7002.2	controllerType=0 controllerNumber=1 scan=7002	21.3033
08544:3	1	S.MPLPPHPGHP[+15.995]G.Y		P[+16]	384.861	3	1152.57	1152.56	0	5.9	17	Non	331.33	302.86	4.62	4.05	1206	>sp|P02817|AMELX_BOVIN Amelogenin, X isoform OS=Bos taurus OX=9913 GN=AMELX PE=1 SV=2	1	hf1_10472_ebo_26_1_261219.ScanId;v=1;d1=8012.8012.3	controllerType=0 controllerNumber=1 scan=8012	23.0634
09132:3	1	S.MPLPPHPGHP[+15.995]G.Y		P[+16]	384.861	3	1152.57	1152.56	0	6.7	17	Non	339.63	255.67	22.76	4.17	1206	>sp|P02817|AMELX_BOVIN Amelogenin, X isoform OS=Bos taurus OX=9913 GN=AMELX PE=1 SV=2	1	hf1_10472_ebo_26_1_261219.ScanId;v=1;d1=8416.8416.3	controllerType=0 controllerNumber=1 scan=8416	23.7705
07946:3	1	S.M[+15.995]PLPPHPGHPG.Y		M[+16]	384.861	3	1152.57	1152.56	0	5.8	17	Non	365.5	344.16	37.26	4.42	1206	>sp|P02817|AMELX_BOVIN Amelogenin, X isoform OS=Bos taurus OX=9913 GN=AMELX PE=1 SV=2	1	hf1_10472_ebo_26_1_261219.ScanId;v=1;d1=7601.7601.3	controllerType=0 controllerNumber=1 scan=7601	22.3491
06645:2	1	S.M[+15.995]PLPPHPGHPG.Y		M[+16]	576.788	2	1152.57	1152.56	0	6.6	17	Non	373.85	341.3	55.56	4.23	1206	>sp|P02817|AMELX_BOVIN Amelogenin, X isoform OS=Bos taurus OX=9913 GN=AMELX PE=1 SV=2	1	hf1_10472_ebo_26_1_261219.ScanId;v=1;d1=6715.6715.2	controllerType=0 controllerNumber=1 scan=6715	20.8025
06634:2	1	S.M[+15.995]PLPPHPGHPG.Y		M[+16]	576.788	2	1152.57	1152.56	0	6.4	17	Non	396.15	365.53	65.68	5.09	1206	>sp|P02817|AMELX_BOVIN Amelogenin, X isoform OS=Bos taurus OX=9913 GN=AMELX PE=1 SV=2	1	hf1_10472_ebo_26_1_261219.ScanId;v=1;d1=6707.6707.2	controllerType=0 controllerNumber=1 scan=6707	20.7877
07667:3	1	S.M[+15.995]PLPPHPGHPG.Y		M[+16]	384.861	3	1152.57	1152.56	0	4.9	17	Non	398.38	329.29	35.73	4.42	1206	>sp|P02817|AMELX_BOVIN Amelogenin, X isoform OS=Bos taurus OX=9913 GN=AMELX PE=1 SV=2	1	hf1_10472_ebo_26_1_261219.ScanId;v=1;d1=7404.7404.3	controllerType=0 controllerNumber=1 scan=7404	22.0062
08843:3	1	S.MPLPPHPGHP[+15.995]G.Y		P[+16]	384.861	3	1152.57	1152.56	0	6.3	17	Non	407.32	317.53	10.22	4.48	1206	>sp|P02817|AMELX_BOVIN Amelogenin, X isoform OS=Bos taurus OX=9913 GN=AMELX PE=1 SV=2	1	hf1_10472_ebo_26_1_261219.ScanId;v=1;d1=8216.8216.3	controllerType=0 controllerNumber=1 scan=8216	23.4204
07383:3	1	S.M[+15.995]PLPPHPGHPG.Y		M[+16]	384.861	3	1152.57	1152.56	0	5.8	17	Non	409.38	365.04	36.87	5.42	1206	>sp|P02817|AMELX_BOVIN Amelogenin, X isoform OS=Bos taurus OX=9913 GN=AMELX PE=1 SV=2	1	hf1_10472_ebo_26_1_261219.ScanId;v=1;d1=7208.7208.3	controllerType=0 controllerNumber=1 scan=7208	21.6631
05877:3	1	S.M[+15.995]PLPPHPGHPG.Y		M[+16]	384.861	3	1152.57	1152.56	0	6.4	17	Non	415.57	350.07	59.45	5.3	1206	>sp|P02817|AMELX_BOVIN Amelogenin, X isoform OS=Bos taurus OX=9913 GN=AMELX PE=1 SV=2	1	hf1_10472_ebo_26_1_261219.ScanId;v=1;d1=6200.6200.3	controllerType=0 controllerNumber=1 scan=6200	19.9038
06168:3	1	S.M[+15.995]PLPPHPGHPG.Y		M[+16]	384.862	3	1152.57	1152.56	0	7.2	17	Non	424.07	360.23	47.42	6.17	1206	>sp|P02817|AMELX_BOVIN Amelogenin, X isoform OS=Bos taurus OX=9913 GN=AMELX PE=1 SV=2	1	hf1_10472_ebo_26_1_261219.ScanId;v=1;d1=6398.6398.3	controllerType=0 controllerNumber=1 scan=6398	20.2495
05271:3	1	S.M[+15.995]PLPPHPGHPG.Y		M[+16]	384.861	3	1152.57	1152.56	0	4.7	17	Non	425.09	418.39	36.04	6.13	1206	>sp|P02817|AMELX_BOVIN Amelogenin, X isoform OS=Bos taurus OX=9913 GN=AMELX PE=1 SV=2	1	hf1_10472_ebo_26_1_261219.ScanId;v=1;d1=5799.5799.3	controllerType=0 controllerNumber=1 scan=5799	19.2048
06766:3	1	S.M[+15.995]PLPPHPGHPG.Y		M[+16]	384.861	3	1152.57	1152.56	0	6.1	17	Non	434.48	391.77	46.87	6.13	1206	>sp|P02817|AMELX_BOVIN Amelogenin, X isoform OS=Bos taurus OX=9913 GN=AMELX PE=1 SV=2	1	hf1_10472_ebo_26_1_261219.ScanId;v=1;d1=6797.6797.3	controllerType=0 controllerNumber=1 scan=6797	20.946
06470:3	1	S.M[+15.995]PLPPHPGHPG.Y		M[+16]	384.861	3	1152.57	1152.56	0	6.5	17	Non	437.96	403.51	34.06	6.17	1206	>sp|P02817|AMELX_BOVIN Amelogenin, X isoform OS=Bos taurus OX=9913 GN=AMELX PE=1 SV=2	1	hf1_10472_ebo_26_1_261219.ScanId;v=1;d1=6600.6600.3	controllerType=0 controllerNumber=1 scan=6600	20.6033
05573:3	1	S.M[+15.995]PLPPHPGHPG.Y		M[+16]	384.862	3	1152.57	1152.56	0	7.6	17	Non	452.19	393.62	38.87	6.23	1206	>sp|P02817|AMELX_BOVIN Amelogenin, X isoform OS=Bos taurus OX=9913 GN=AMELX PE=1 SV=2	1	hf1_10472_ebo_26_1_261219.ScanId;v=1;d1=6002.6002.3	controllerType=0 controllerNumber=1 scan=6002	19.5599
07064:3	1	S.M[+15.995]PLPPHPGHPG.Y		M[+16]	384.861	3	1152.57	1152.56	0	6	17	Non	463.98	360.94	35.12	6.19	1206	>sp|P02817|AMELX_BOVIN Amelogenin, X isoform OS=Bos taurus OX=9913 GN=AMELX PE=1 SV=2	1	hf1_10472_ebo_26_1_261219.ScanId;v=1;d1=6996.6996.3	controllerType=0 controllerNumber=1 scan=6996	21.2944
46229:3	1	S.M[+15.995]PLPPHPGHPG.Y		M[+16]	384.862	3	1152.57	1152.56	0	7.7	17	Non	487.49	413.23	48.55	6.27	1206	>sp|P02817|AMELX_BOVIN Amelogenin, X isoform OS=Bos taurus OX=9913 GN=AMELX PE=1 SV=2	1	hf1_10472_ebo_26_1_261219.ScanId;v=1;d1=34377.34377.3	controllerType=0 controllerNumber=1 scan=34377	73.6004
05391:2	1	S.M[+15.995]PLPPHPGHPG.Y		M[+16]	576.788	2	1152.57	1152.56	0	6	17	Non	510.17	437.03	76.92	6.19	1206	>sp|P02817|AMELX_BOVIN Amelogenin, X isoform OS=Bos taurus OX=9913 GN=AMELX PE=1 SV=2	1	hf1_10472_ebo_26_1_261219.ScanId;v=1;d1=5882.5882.2	controllerType=0 controllerNumber=1 scan=5882	19.3503
06284:2	1	S.M[+15.995]PLPPHPGHPG.Y		M[+16]	576.788	2	1152.57	1152.56	0	5.7	17	Non	519.81	429.73	70.33	5.49	1206	>sp|P02817|AMELX_BOVIN Amelogenin, X isoform OS=Bos taurus OX=9913 GN=AMELX PE=1 SV=2	1	hf1_10472_ebo_26_1_261219.ScanId;v=1;d1=6475.6475.2	controllerType=0 controllerNumber=1 scan=6475	20.3845
05981:2	1	S.M[+15.995]PLPPHPGHPG.Y		M[+16]	576.788	2	1152.57	1152.56	0	6.2	17	Non	566.03	405.59	68.33	6.45	1206	>sp|P02817|AMELX_BOVIN Amelogenin, X isoform OS=Bos taurus OX=9913 GN=AMELX PE=1 SV=2	1	hf1_10472_ebo_26_1_261219.ScanId;v=1;d1=6277.6277.2	controllerType=0 controllerNumber=1 scan=6277	20.0391
05690:2	1	S.M[+15.995]PLPPHPGHPG.Y		M[+16]	576.788	2	1152.57	1152.56	0	6.1	17	Non	571.02	434.55	74.26	7.11	1206	>sp|P02817|AMELX_BOVIN Amelogenin, X isoform OS=Bos taurus OX=9913 GN=AMELX PE=1 SV=2	1	hf1_10472_ebo_26_1_261219.ScanId;v=1;d1=6079.6079.2	controllerType=0 controllerNumber=1 scan=6079	19.6945
04727:3	1	S.M[+15.995]PLPPHPGHP[+15.995]G.Y		M[+16], P[+16]	390.193	3	1168.56	1168.56	0	6.4	17	Non	329.69	259.76	15.12	4.17	1206	>sp|P02817|AMELX_BOVIN Amelogenin, X isoform OS=Bos taurus OX=9913 GN=AMELX PE=1 SV=2	1	hf1_10472_ebo_26_1_261219.ScanId;v=1;d1=5431.5431.3	controllerType=0 controllerNumber=1 scan=5431	18.5567
12855:2	1	S.MPLPPHPGHPGY.I			650.323	2	1299.64	1299.63	0	6.1	17	Non	334.9	217.42	217.42	3.72	1206	>sp|P02817|AMELX_BOVIN Amelogenin, X isoform OS=Bos taurus OX=9913 GN=AMELX PE=1 SV=2	1	hf1_10472_ebo_26_1_261219.ScanId;v=1;d1=10923.10923.2	controllerType=0 controllerNumber=1 scan=10923	28.1555
12578:2	1	S.MPLPPHPGHPGY.I			650.322	2	1299.64	1299.63	0	4.4	17	Non	403.71	331	331	4.41	1206	>sp|P02817|AMELX_BOVIN Amelogenin, X isoform OS=Bos taurus OX=9913 GN=AMELX PE=1 SV=2	1	hf1_10472_ebo_26_1_261219.ScanId;v=1;d1=10728.10728.2	controllerType=0 controllerNumber=1 scan=10728	27.807
12544:3	1	S.MPLPPHPGHPGY.I			433.884	3	1299.64	1299.63	0	6	17	Non	459.62	349.58	349.58	4.5	1206	>sp|P02817|AMELX_BOVIN Amelogenin, X isoform OS=Bos taurus OX=9913 GN=AMELX PE=1 SV=2	1	hf1_10472_ebo_26_1_261219.ScanId;v=1;d1=10706.10706.3	controllerType=0 controllerNumber=1 scan=10706	27.7688
13988:3	1	S.MPLPPHPGHPGY.I			433.884	3	1299.64	1299.63	0	5.7	17	Non	487.45	378.72	378.72	6.23	1206	>sp|P02817|AMELX_BOVIN Amelogenin, X isoform OS=Bos taurus OX=9913 GN=AMELX PE=1 SV=2	1	hf1_10472_ebo_26_1_261219.ScanId;v=1;d1=11681.11681.3	controllerType=0 controllerNumber=1 scan=11681	29.4875
13708:3	1	S.MPLPPHPGHPGY.I			433.884	3	1299.64	1299.63	0	5.6	17	Non	498.73	371.58	371.58	5.52	1206	>sp|P02817|AMELX_BOVIN Amelogenin, X isoform OS=Bos taurus OX=9913 GN=AMELX PE=1 SV=2	1	hf1_10472_ebo_26_1_261219.ScanId;v=1;d1=11487.11487.3	controllerType=0 controllerNumber=1 scan=11487	29.1458
13409:3	1	S.MPLPPHPGHPGY.I			433.884	3	1299.64	1299.63	0	6	17	Non	525.4	396.07	396.07	6.33	1206	>sp|P02817|AMELX_BOVIN Amelogenin, X isoform OS=Bos taurus OX=9913 GN=AMELX PE=1 SV=2	1	hf1_10472_ebo_26_1_261219.ScanId;v=1;d1=11289.11289.3	controllerType=0 controllerNumber=1 scan=11289	28.8015
12817:3	1	S.MPLPPHPGHPGY.I			433.884	3	1299.64	1299.63	0	5.9	17	Non	526.6	399.41	399.41	6.33	1206	>sp|P02817|AMELX_BOVIN Amelogenin, X isoform OS=Bos taurus OX=9913 GN=AMELX PE=1 SV=2	1	hf1_10472_ebo_26_1_261219.ScanId;v=1;d1=10896.10896.3	controllerType=0 controllerNumber=1 scan=10896	28.1099
13116:3	1	S.MPLPPHPGHPGY.I			433.884	3	1299.64	1299.63	0	5.9	17	Non	546.86	421.39	421.39	6.33	1206	>sp|P02817|AMELX_BOVIN Amelogenin, X isoform OS=Bos taurus OX=9913 GN=AMELX PE=1 SV=2	1	hf1_10472_ebo_26_1_261219.ScanId;v=1;d1=11095.11095.3	controllerType=0 controllerNumber=1 scan=11095	28.4578
13824:2	1	S.MPLPPHPGHPGY.I			650.322	2	1299.64	1299.63	0	5.4	17	Non	566.95	411.44	411.44	7.11	1206	>sp|P02817|AMELX_BOVIN Amelogenin, X isoform OS=Bos taurus OX=9913 GN=AMELX PE=1 SV=2	1	hf1_10472_ebo_26_1_261219.ScanId;v=1;d1=11566.11566.2	controllerType=0 controllerNumber=1 scan=11566	29.2828
13236:2	1	S.MPLPPHPGHPGY.I			650.323	2	1299.64	1299.63	0	6.5	17	Non	591.63	425.55	425.55	7.15	1206	>sp|P02817|AMELX_BOVIN Amelogenin, X isoform OS=Bos taurus OX=9913 GN=AMELX PE=1 SV=2	1	hf1_10472_ebo_26_1_261219.ScanId;v=1;d1=11173.11173.2	controllerType=0 controllerNumber=1 scan=11173	28.5953
13529:2	1	S.MPLPPHPGHPGY.I			650.323	2	1299.64	1299.63	0	6	17	Non	594.25	446.01	446.01	6.4	1206	>sp|P02817|AMELX_BOVIN Amelogenin, X isoform OS=Bos taurus OX=9913 GN=AMELX PE=1 SV=2	1	hf1_10472_ebo_26_1_261219.ScanId;v=1;d1=11366.11366.2	controllerType=0 controllerNumber=1 scan=11366	28.935
12846:2	1	S.MPLPPHPGHPGY.I			650.323	2	1299.64	1299.63	0	6.1	17	Non	651.48	519.58	519.58	9.11	1206	>sp|P02817|AMELX_BOVIN Amelogenin, X isoform OS=Bos taurus OX=9913 GN=AMELX PE=1 SV=2	1	hf1_10472_ebo_26_1_261219.ScanId;v=1;d1=10918.10918.2	controllerType=0 controllerNumber=1 scan=10918	28.148
10797:3	1	S.M[+15.995]PLPPHPGHPGY.I		M[+16]	439.216	3	1315.63	1315.63	0	5.6	17	Non	166.56	166.56	6.7	2.26	1206	>sp|P02817|AMELX_BOVIN Amelogenin, X isoform OS=Bos taurus OX=9913 GN=AMELX PE=1 SV=2	1	hf1_10472_ebo_26_1_261219.ScanId;v=1;d1=9524.9524.2	controllerType=0 controllerNumber=1 scan=9524	25.6986
12547:3	1	S.MPLPPHPGHP[+15.995]GY.I		P[+16]	439.216	3	1315.63	1315.63	0	5.4	17	Non	187.68	135.47	1.24	1.63	1206	>sp|P02817|AMELX_BOVIN Amelogenin, X isoform OS=Bos taurus OX=9913 GN=AMELX PE=1 SV=2	1	hf1_10472_ebo_26_1_261219.ScanId;v=1;d1=10707.10707.3	controllerType=0 controllerNumber=1 scan=10707	27.7702
10338:2	1	S.M[+15.995]PLPPHPGHPGY.I		M[+16]	658.32	2	1315.63	1315.63	0	6	17	Non	303.92	233.96	15.28	3.74	1206	>sp|P02817|AMELX_BOVIN Amelogenin, X isoform OS=Bos taurus OX=9913 GN=AMELX PE=1 SV=2	1	hf1_10472_ebo_26_1_261219.ScanId;v=1;d1=9222.9222.2	controllerType=0 controllerNumber=1 scan=9222	25.1752
09876:2	1	S.M[+15.995]PLPPHPGHPGY.I		M[+16]	658.32	2	1315.63	1315.63	0	5.6	17	Non	316.31	236.76	30.12	3.74	1206	>sp|P02817|AMELX_BOVIN Amelogenin, X isoform OS=Bos taurus OX=9913 GN=AMELX PE=1 SV=2	1	hf1_10472_ebo_26_1_261219.ScanId;v=1;d1=8909.8909.4	controllerType=0 controllerNumber=1 scan=8909	24.6352
09569:2	1	S.M[+15.995]PLPPHPGHPGY.I		M[+16]	658.32	2	1315.63	1315.63	0	6.4	17	Non	319.64	206.63	6.36	3.78	1206	>sp|P02817|AMELX_BOVIN Amelogenin, X isoform OS=Bos taurus OX=9913 GN=AMELX PE=1 SV=2	1	hf1_10472_ebo_26_1_261219.ScanId;v=1;d1=8702.8702.2	controllerType=0 controllerNumber=1 scan=8702	24.2704
09265:2	1	S.M[+15.995]PLPPHPGHPGY.I		M[+16]	658.321	2	1315.64	1315.63	0	7.8	17	Non	380.79	303.73	33.54	5.13	1206	>sp|P02817|AMELX_BOVIN Amelogenin, X isoform OS=Bos taurus OX=9913 GN=AMELX PE=1 SV=2	1	hf1_10472_ebo_26_1_261219.ScanId;v=1;d1=8504.8504.2	controllerType=0 controllerNumber=1 scan=8504	23.9241
08983:2	1	S.M[+15.995]PLPPHPGHPGY.I		M[+16]	658.32	2	1315.63	1315.63	0	6.3	17	Non	397.12	318.3	62.35	4.43	1206	>sp|P02817|AMELX_BOVIN Amelogenin, X isoform OS=Bos taurus OX=9913 GN=AMELX PE=1 SV=2	1	hf1_10472_ebo_26_1_261219.ScanId;v=1;d1=8309.8309.2	controllerType=0 controllerNumber=1 scan=8309	23.5815
08524:3	1	S.M[+15.995]PLPPHPGHPGY.I		M[+16]	439.216	3	1315.63	1315.63	0	5.1	17	Non	460.81	413.55	27.78	6.19	1206	>sp|P02817|AMELX_BOVIN Amelogenin, X isoform OS=Bos taurus OX=9913 GN=AMELX PE=1 SV=2	1	hf1_10472_ebo_26_1_261219.ScanId;v=1;d1=7999.7999.3	controllerType=0 controllerNumber=1 scan=7999	23.0412
10051:2	1	S.M[+15.995]PLPPHPGHPGY.I		M[+16]	658.321	2	1315.63	1315.63	0	6.7	17	Non	474.46	328.96	60.84	4.51	1206	>sp|P02817|AMELX_BOVIN Amelogenin, X isoform OS=Bos taurus OX=9913 GN=AMELX PE=1 SV=2	1	hf1_10472_ebo_26_1_261219.ScanId;v=1;d1=9025.9025.2	controllerType=0 controllerNumber=1 scan=9025	24.8313
10584:3	1	S.M[+15.995]PLPPHPGHPGY.I		M[+16]	439.216	3	1315.63	1315.63	0	5.9	17	Non	492.3	420.73	27.95	6.23	1206	>sp|P02817|AMELX_BOVIN Amelogenin, X isoform OS=Bos taurus OX=9913 GN=AMELX PE=1 SV=2	1	hf1_10472_ebo_26_1_261219.ScanId;v=1;d1=9385.9385.3	controllerType=0 controllerNumber=1 scan=9385	25.4586
09997:3	1	S.M[+15.995]PLPPHPGHPGY.I		M[+16]	439.216	3	1315.63	1315.63	0	6.1	17	Non	509.86	408.31	37.49	6.23	1206	>sp|P02817|AMELX_BOVIN Amelogenin, X isoform OS=Bos taurus OX=9913 GN=AMELX PE=1 SV=2	1	hf1_10472_ebo_26_1_261219.ScanId;v=1;d1=8986.8986.3	controllerType=0 controllerNumber=1 scan=8986	24.7654
10287:3	1	S.M[+15.995]PLPPHPGHPGY.I		M[+16]	439.216	3	1315.63	1315.63	0	6.1	17	Non	519.27	432.43	29.63	5.41	1206	>sp|P02817|AMELX_BOVIN Amelogenin, X isoform OS=Bos taurus OX=9913 GN=AMELX PE=1 SV=2	1	hf1_10472_ebo_26_1_261219.ScanId;v=1;d1=9187.9187.3	controllerType=0 controllerNumber=1 scan=9187	25.1161
09401:3	1	S.M[+15.995]PLPPHPGHPGY.I		M[+16]	439.216	3	1315.63	1315.63	0	7.1	17	Non	520.23	444.91	33.51	6.38	1206	>sp|P02817|AMELX_BOVIN Amelogenin, X isoform OS=Bos taurus OX=9913 GN=AMELX PE=1 SV=2	1	hf1_10472_ebo_26_1_261219.ScanId;v=1;d1=8590.8590.3	controllerType=0 controllerNumber=1 scan=8590	24.0757
09696:3	1	S.M[+15.995]PLPPHPGHPGY.I		M[+16]	439.216	3	1315.63	1315.63	0	5.9	17	Non	527.01	482.71	33	6.33	1206	>sp|P02817|AMELX_BOVIN Amelogenin, X isoform OS=Bos taurus OX=9913 GN=AMELX PE=1 SV=2	1	hf1_10472_ebo_26_1_261219.ScanId;v=1;d1=8788.8788.3	controllerType=0 controllerNumber=1 scan=8788	24.4214
09099:3	1	S.M[+15.995]PLPPHPGHPGY.I		M[+16]	439.216	3	1315.63	1315.63	0	7	17	Non	534.56	454.76	30.02	6.38	1206	>sp|P02817|AMELX_BOVIN Amelogenin, X isoform OS=Bos taurus OX=9913 GN=AMELX PE=1 SV=2	1	hf1_10472_ebo_26_1_261219.ScanId;v=1;d1=8392.8392.3	controllerType=0 controllerNumber=1 scan=8392	23.7287
08811:3	1	S.M[+15.995]PLPPHPGHPGY.I		M[+16]	439.216	3	1315.63	1315.63	0	6.5	17	Non	540.13	459.27	46.69	6.38	1206	>sp|P02817|AMELX_BOVIN Amelogenin, X isoform OS=Bos taurus OX=9913 GN=AMELX PE=1 SV=2	1	hf1_10472_ebo_26_1_261219.ScanId;v=1;d1=8194.8194.3	controllerType=0 controllerNumber=1 scan=8194	23.3819
13527:3	1	S.M[+15.995]PLPPHPGHPGYI.N		M[+16]	476.911	3	1428.72	1428.71	0	5.4	17	Non	245.68	232.17	22.65	2.92	1206	>sp|P02817|AMELX_BOVIN Amelogenin, X isoform OS=Bos taurus OX=9913 GN=AMELX PE=1 SV=2	1	hf1_10472_ebo_26_1_261219.ScanId;v=1;d1=11364.11364.3	controllerType=0 controllerNumber=1 scan=11364	28.9292
46170:3	1	S.MPLPPHPGHPGYIN.F			509.594	3	1526.77	1526.76	0	7.3	17	Non	295.35	229.31	229.31	3.81	1206	>sp|P02817|AMELX_BOVIN Amelogenin, X isoform OS=Bos taurus OX=9913 GN=AMELX PE=1 SV=2	1	hf1_10472_ebo_26_1_261219.ScanId;v=1;d1=34333.34333.3	controllerType=0 controllerNumber=1 scan=34333	73.5228
15996:3	1	S.MPLPPHPGHPGYIN.F			509.594	3	1526.77	1526.76	0	5.7	17	Non	432.32	337.19	337.19	4.55	1206	>sp|P02817|AMELX_BOVIN Amelogenin, X isoform OS=Bos taurus OX=9913 GN=AMELX PE=1 SV=2	1	hf1_10472_ebo_26_1_261219.ScanId;v=1;d1=13047.13047.3	controllerType=0 controllerNumber=1 scan=13047	31.8459
15780:2	1	S.MPLPPHPGHPGYIN.F			763.888	2	1526.77	1526.76	0	7.8	17	Non	482.46	321.44	321.44	4.66	1206	>sp|P02817|AMELX_BOVIN Amelogenin, X isoform OS=Bos taurus OX=9913 GN=AMELX PE=1 SV=2	1	hf1_10472_ebo_26_1_261219.ScanId;v=1;d1=12905.12905.2	controllerType=0 controllerNumber=1 scan=12905	31.6014
15688:3	1	S.MPLPPHPGHPGYIN.F			509.594	3	1526.77	1526.76	0	7.4	17	Non	515.53	402.47	402.47	6.27	1206	>sp|P02817|AMELX_BOVIN Amelogenin, X isoform OS=Bos taurus OX=9913 GN=AMELX PE=1 SV=2	1	hf1_10472_ebo_26_1_261219.ScanId;v=1;d1=12842.12842.3	controllerType=0 controllerNumber=1 scan=12842	31.4916
15114:3	1	S.MPLPPHPGHPGYIN.F			509.593	3	1526.76	1526.76	0	4.5	17	Non	536.94	403.37	403.37	6.33	1206	>sp|P02817|AMELX_BOVIN Amelogenin, X isoform OS=Bos taurus OX=9913 GN=AMELX PE=1 SV=2	1	hf1_10472_ebo_26_1_261219.ScanId;v=1;d1=12425.12425.3	controllerType=0 controllerNumber=1 scan=12425	30.7773
14511:3	1	S.MPLPPHPGHPGYIN.F			509.594	3	1526.77	1526.76	0	6.1	17	Non	538.52	415.43	415.43	6.33	1206	>sp|P02817|AMELX_BOVIN Amelogenin, X isoform OS=Bos taurus OX=9913 GN=AMELX PE=1 SV=2	1	hf1_10472_ebo_26_1_261219.ScanId;v=1;d1=12021.12021.3	controllerType=0 controllerNumber=1 scan=12021	30.08
15392:3	1	S.MPLPPHPGHPGYIN.F			509.593	3	1526.76	1526.76	0	4.8	17	Non	558.78	461.74	461.74	6.33	1206	>sp|P02817|AMELX_BOVIN Amelogenin, X isoform OS=Bos taurus OX=9913 GN=AMELX PE=1 SV=2	1	hf1_10472_ebo_26_1_261219.ScanId;v=1;d1=12634.12634.3	controllerType=0 controllerNumber=1 scan=12634	31.1369
14824:3	1	S.MPLPPHPGHPGYIN.F			509.594	3	1526.77	1526.76	0	6.9	17	Non	573.06	477.39	477.39	7.18	1206	>sp|P02817|AMELX_BOVIN Amelogenin, X isoform OS=Bos taurus OX=9913 GN=AMELX PE=1 SV=2	1	hf1_10472_ebo_26_1_261219.ScanId;v=1;d1=12226.12226.3	controllerType=0 controllerNumber=1 scan=12226	30.4364
15483:2	1	S.MPLPPHPGHPGYIN.F			763.886	2	1526.77	1526.76	0	5.1	17	Non	588.28	416.47	416.47	7.11	1206	>sp|P02817|AMELX_BOVIN Amelogenin, X isoform OS=Bos taurus OX=9913 GN=AMELX PE=1 SV=2	1	hf1_10472_ebo_26_1_261219.ScanId;v=1;d1=12699.12699.2	controllerType=0 controllerNumber=1 scan=12699	31.2483
15220:2	1	S.MPLPPHPGHPGYIN.F			763.885	2	1526.76	1526.76	0	4.2	17	Non	594.26	423.44	423.44	5.98	1206	>sp|P02817|AMELX_BOVIN Amelogenin, X isoform OS=Bos taurus OX=9913 GN=AMELX PE=1 SV=2	1	hf1_10472_ebo_26_1_261219.ScanId;v=1;d1=12502.12502.2	controllerType=0 controllerNumber=1 scan=12502	30.9074
14598:2	1	S.MPLPPHPGHPGYIN.F			763.887	2	1526.77	1526.76	0	6.5	17	Non	612.81	449.74	449.74	7.45	1206	>sp|P02817|AMELX_BOVIN Amelogenin, X isoform OS=Bos taurus OX=9913 GN=AMELX PE=1 SV=2	1	hf1_10472_ebo_26_1_261219.ScanId;v=1;d1=12078.12078.2	controllerType=0 controllerNumber=1 scan=12078	30.1775
14930:2	1	S.MPLPPHPGHPGYIN.F			763.886	2	1526.77	1526.76	0	5.2	17	Non	636.5	438.97	438.97	8.11	1206	>sp|P02817|AMELX_BOVIN Amelogenin, X isoform OS=Bos taurus OX=9913 GN=AMELX PE=1 SV=2	1	hf1_10472_ebo_26_1_261219.ScanId;v=1;d1=12297.12297.2	controllerType=0 controllerNumber=1 scan=12297	30.5564
14075:3	1	S.MPLPPHPGHPGY[+15.995]IN.F		Y[+16]	514.925	3	1542.76	1542.75	0	6	17	Non	155.88	155.88	12.95	1.63	1206	>sp|P02817|AMELX_BOVIN Amelogenin, X isoform OS=Bos taurus OX=9913 GN=AMELX PE=1 SV=2	1	hf1_10472_ebo_26_1_261219.ScanId;v=1;d1=11736.11736.2	controllerType=0 controllerNumber=1 scan=11736	29.5834
12584:2	1	S.M[+15.995]PLPPHPGHPGYIN.F		M[+16]	771.885	2	1542.76	1542.75	0	6.1	17	Non	236.71	233.43	24.28	2.72	1206	>sp|P02817|AMELX_BOVIN Amelogenin, X isoform OS=Bos taurus OX=9913 GN=AMELX PE=1 SV=2	1	hf1_10472_ebo_26_1_261219.ScanId;v=1;d1=10731.10731.2	controllerType=0 controllerNumber=1 scan=10731	27.8115
14316:3	1	S.MPLPPHPGHPGY[+15.995]IN.F		Y[+16]	514.925	3	1542.76	1542.75	0	5	17	Non	245.15	177.6	3.37	3.05	1206	>sp|P02817|AMELX_BOVIN Amelogenin, X isoform OS=Bos taurus OX=9913 GN=AMELX PE=1 SV=2	1	hf1_10472_ebo_26_1_261219.ScanId;v=1;d1=11896.11896.3	controllerType=0 controllerNumber=1 scan=11896	29.8611
46206:3	1	S.MP[+15.995]LPPHPGHPGYIN.F		P[+16]	514.926	3	1542.76	1542.75	0	7.2	17	Non	247.69	247.69	4	3.71	1206	>sp|P02817|AMELX_BOVIN Amelogenin, X isoform OS=Bos taurus OX=9913 GN=AMELX PE=1 SV=2	1	hf1_10472_ebo_26_1_261219.ScanId;v=1;d1=34360.34360.3	controllerType=0 controllerNumber=1 scan=34360	73.5721
13405:3	1	S.MPLPP[+15.995]HPGHPGYIN.F		P[+16]	514.925	3	1542.76	1542.75	0	5.6	17	Non	289.06	245.54	10.66	3.65	1206	>sp|P02817|AMELX_BOVIN Amelogenin, X isoform OS=Bos taurus OX=9913 GN=AMELX PE=1 SV=2	1	hf1_10472_ebo_26_1_261219.ScanId;v=1;d1=11284.11284.3	controllerType=0 controllerNumber=1 scan=11284	28.7911
14007:3	1	S.MPLPPHPGHPGY[+15.995]IN.F		Y[+16]	514.925	3	1542.76	1542.75	0	5.7	17	Non	368.2	320.2	0.41	4.22	1206	>sp|P02817|AMELX_BOVIN Amelogenin, X isoform OS=Bos taurus OX=9913 GN=AMELX PE=1 SV=2	1	hf1_10472_ebo_26_1_261219.ScanId;v=1;d1=11693.11693.3	controllerType=0 controllerNumber=1 scan=11693	29.5083
10686:3	1	S.M[+15.995]PLPPHPGHPGYIN.F		M[+16]	514.925	3	1542.76	1542.75	0	5.8	17	Non	380.81	380.81	12.55	5.29	1206	>sp|P02817|AMELX_BOVIN Amelogenin, X isoform OS=Bos taurus OX=9913 GN=AMELX PE=1 SV=2	1	hf1_10472_ebo_26_1_261219.ScanId;v=1;d1=9455.9455.3	controllerType=0 controllerNumber=1 scan=9455	25.5791
12133:2	1	S.M[+15.995]PLPPHPGHPGYIN.F		M[+16]	771.884	2	1542.76	1542.75	0	5.6	17	Non	390.12	390.12	28.2	5.05	1206	>sp|P02817|AMELX_BOVIN Amelogenin, X isoform OS=Bos taurus OX=9913 GN=AMELX PE=1 SV=2	1	hf1_10472_ebo_26_1_261219.ScanId;v=1;d1=10437.10437.2	controllerType=0 controllerNumber=1 scan=10437	27.2975
12735:3	1	S.M[+15.995]PLPPHPGHPGYIN.F		M[+16]	514.925	3	1542.76	1542.75	0	5.3	17	Non	397.2	397.2	1.5	5.08	1206	>sp|P02817|AMELX_BOVIN Amelogenin, X isoform OS=Bos taurus OX=9913 GN=AMELX PE=1 SV=2	1	hf1_10472_ebo_26_1_261219.ScanId;v=1;d1=10838.10838.3	controllerType=0 controllerNumber=1 scan=10838	28.0068
10867:2	1	S.M[+15.995]PLPPHPGHPGYIN.F		M[+16]	771.883	2	1542.76	1542.75	0	4.4	17	Non	403.82	391.85	41.84	5.28	1206	>sp|P02817|AMELX_BOVIN Amelogenin, X isoform OS=Bos taurus OX=9913 GN=AMELX PE=1 SV=2	1	hf1_10472_ebo_26_1_261219.ScanId;v=1;d1=9576.9576.2	controllerType=0 controllerNumber=1 scan=9576	25.7874
12145:3	1	S.M[+15.995]PLPPHPGHPGYIN.F		M[+16]	514.925	3	1542.76	1542.75	0	6	17	Non	404.96	404.96	22.51	5.31	1206	>sp|P02817|AMELX_BOVIN Amelogenin, X isoform OS=Bos taurus OX=9913 GN=AMELX PE=1 SV=2	1	hf1_10472_ebo_26_1_261219.ScanId;v=1;d1=10445.10445.3	controllerType=0 controllerNumber=1 scan=10445	27.312
12441:3	1	S.M[+15.995]PLPPHPGHPGYIN.F		M[+16]	514.925	3	1542.76	1542.75	0	6	17	Non	410.4	410.4	5.88	5.31	1206	>sp|P02817|AMELX_BOVIN Amelogenin, X isoform OS=Bos taurus OX=9913 GN=AMELX PE=1 SV=2	1	hf1_10472_ebo_26_1_261219.ScanId;v=1;d1=10637.10637.3	controllerType=0 controllerNumber=1 scan=10637	27.6505
11257:3	1	S.MP[+15.995]LPPHPGHPGYIN.F		P[+16]	514.926	3	1542.76	1542.75	0	6.3	17	Non	434.56	434.56	4	6.17	1206	>sp|P02817|AMELX_BOVIN Amelogenin, X isoform OS=Bos taurus OX=9913 GN=AMELX PE=1 SV=2	1	hf1_10472_ebo_26_1_261219.ScanId;v=1;d1=9850.9850.3	controllerType=0 controllerNumber=1 scan=9850	26.2726
11862:3	1	S.MP[+15.995]LPPHPGHPGYIN.F		P[+16]	514.925	3	1542.76	1542.75	0	5.4	17	Non	441.97	441.97	4	6.19	1206	>sp|P02817|AMELX_BOVIN Amelogenin, X isoform OS=Bos taurus OX=9913 GN=AMELX PE=1 SV=2	1	hf1_10472_ebo_26_1_261219.ScanId;v=1;d1=10250.10250.3	controllerType=0 controllerNumber=1 scan=10250	26.9712
11780:2	1	S.M[+15.995]PLPPHPGHPGYIN.F		M[+16]	771.885	2	1542.76	1542.75	0	6.9	17	Non	443.47	441.55	29.72	5.49	1206	>sp|P02817|AMELX_BOVIN Amelogenin, X isoform OS=Bos taurus OX=9913 GN=AMELX PE=1 SV=2	1	hf1_10472_ebo_26_1_261219.ScanId;v=1;d1=10199.10199.2	controllerType=0 controllerNumber=1 scan=10199	26.8816
10978:3	1	S.MP[+15.995]LPPHPGHPGYIN.F		P[+16]	514.924	3	1542.76	1542.75	0	4.3	17	Non	457.34	457.34	4	5.48	1206	>sp|P02817|AMELX_BOVIN Amelogenin, X isoform OS=Bos taurus OX=9913 GN=AMELX PE=1 SV=2	1	hf1_10472_ebo_26_1_261219.ScanId;v=1;d1=9658.9658.3	controllerType=0 controllerNumber=1 scan=9658	25.934
11556:3	1	S.MP[+15.995]LPPHPGHPGYIN.F		P[+16]	514.926	3	1542.76	1542.75	0	6.7	17	Non	477.99	477.99	4	6.23	1206	>sp|P02817|AMELX_BOVIN Amelogenin, X isoform OS=Bos taurus OX=9913 GN=AMELX PE=1 SV=2	1	hf1_10472_ebo_26_1_261219.ScanId;v=1;d1=10051.10051.3	controllerType=0 controllerNumber=1 scan=10051	26.625
15997:3	1	S.MPLPPHPGHPGYIN[+0.984].F		N[+1]	509.92	3	1527.75	1527.74	0	2.7	17	Non	505.23	468.11	468.11	5.8	1206	>sp|P02817|AMELX_BOVIN Amelogenin, X isoform OS=Bos taurus OX=9913 GN=AMELX PE=1 SV=2	1	hf1_10472_ebo_26_1_261219.ScanId;v=1;d1=13047.13047.3	controllerType=0 controllerNumber=1 scan=13047	31.8459
11437:2	1	S.M[+15.995]PLPPHPGHPGYIN.F		M[+16]	771.883	2	1542.76	1542.75	0	4.8	17	Non	547.56	513.69	38.91	5.59	1206	>sp|P02817|AMELX_BOVIN Amelogenin, X isoform OS=Bos taurus OX=9913 GN=AMELX PE=1 SV=2	1	hf1_10472_ebo_26_1_261219.ScanId;v=1;d1=9974.9974.2	controllerType=0 controllerNumber=1 scan=9974	26.4898
11142:2	1	S.M[+15.995]PLPPHPGHPGYIN.F		M[+16]	771.884	2	1542.76	1542.75	0	5.4	17	Non	609.3	586.21	54.25	7.29	1206	>sp|P02817|AMELX_BOVIN Amelogenin, X isoform OS=Bos taurus OX=9913 GN=AMELX PE=1 SV=2	1	hf1_10472_ebo_26_1_261219.ScanId;v=1;d1=9774.9774.2	controllerType=0 controllerNumber=1 scan=9774	26.14
10532:3	1	S.M[+15.995]PLPPHPGHP[+15.995]GYIN.F		M[+16], P[+16]	520.257	3	1558.76	1558.75	0	5.4	17	Non	175.38	175.38	9.35	2.43	1206	>sp|P02817|AMELX_BOVIN Amelogenin, X isoform OS=Bos taurus OX=9913 GN=AMELX PE=1 SV=2	1	hf1_10472_ebo_26_1_261219.ScanId;v=1;d1=9349.9349.3	controllerType=0 controllerNumber=1 scan=9349	25.3939
09826:3	1	S.MP[+15.995]LPPHPGHP[+15.995]GYIN.F		P[+16]*2	520.257	3	1558.76	1558.75	0	5.7	17	Non	220.98	220.98	4	2.6	1206	>sp|P02817|AMELX_BOVIN Amelogenin, X isoform OS=Bos taurus OX=9913 GN=AMELX PE=1 SV=2	1	hf1_10472_ebo_26_1_261219.ScanId;v=1;d1=8871.8871.3	controllerType=0 controllerNumber=1 scan=8871	24.5663
10135:3	1	S.MP[+15.995]LPPHPGHP[+15.995]GYIN.F		P[+16]*2	520.257	3	1558.76	1558.75	0	5.3	17	Non	262.53	262.53	4	3.67	1206	>sp|P02817|AMELX_BOVIN Amelogenin, X isoform OS=Bos taurus OX=9913 GN=AMELX PE=1 SV=2	1	hf1_10472_ebo_26_1_261219.ScanId;v=1;d1=9082.9082.3	controllerType=0 controllerNumber=1 scan=9082	24.9296
44390:3	1	S.MPLPPHPGHPGYINF.S			558.618	3	1673.84	1673.83	0	8.6	17	Non	113.49	113.49	113.49	1.92	1206	>sp|P02817|AMELX_BOVIN Amelogenin, X isoform OS=Bos taurus OX=9913 GN=AMELX PE=1 SV=2	1	hf1_10472_ebo_26_1_261219.ScanId;v=1;d1=32135.32135.3	controllerType=0 controllerNumber=1 scan=32135	65.5262
45949:3	1	S.MPLPPHPGHPGYINF.S			558.614	3	1673.83	1673.83	0	1.4	17	Non	167.04	167.04	167.04	2.2	1206	>sp|P02817|AMELX_BOVIN Amelogenin, X isoform OS=Bos taurus OX=9913 GN=AMELX PE=1 SV=2	1	hf1_10472_ebo_26_1_261219.ScanId;v=1;d1=33993.33993.3	controllerType=0 controllerNumber=1 scan=33993	72.1356
45236:3	1	S.MPLPPHPGHPGYINF.S			558.616	3	1673.83	1673.83	0	4.8	17	Non	176.72	176.72	176.72	2.34	1206	>sp|P02817|AMELX_BOVIN Amelogenin, X isoform OS=Bos taurus OX=9913 GN=AMELX PE=1 SV=2	1	hf1_10472_ebo_26_1_261219.ScanId;v=1;d1=33004.33004.3	controllerType=0 controllerNumber=1 scan=33004	68.3025
26578:3	1	S.MPLPPHPGHPGYINF.S			558.616	3	1673.83	1673.83	0	5.2	17	Non	190.49	190.49	190.49	2.58	1206	>sp|P02817|AMELX_BOVIN Amelogenin, X isoform OS=Bos taurus OX=9913 GN=AMELX PE=1 SV=2	1	hf1_10472_ebo_26_1_261219.ScanId;v=1;d1=20197.20197.3	controllerType=0 controllerNumber=1 scan=20197	44.2139
44593:3	1	S.MPLPPHPGHPGYINF.S			558.616	3	1673.83	1673.83	0	4.8	17	Non	205.21	205.21	205.21	2.78	1206	>sp|P02817|AMELX_BOVIN Amelogenin, X isoform OS=Bos taurus OX=9913 GN=AMELX PE=1 SV=2	1	hf1_10472_ebo_26_1_261219.ScanId;v=1;d1=32286.32286.3	controllerType=0 controllerNumber=1 scan=32286	65.8903
45355:3	1	S.MPLPPHPGHPGYINF.S			558.615	3	1673.83	1673.83	0	3.7	17	Non	249.96	249.96	249.96	3.6	1206	>sp|P02817|AMELX_BOVIN Amelogenin, X isoform OS=Bos taurus OX=9913 GN=AMELX PE=1 SV=2	1	hf1_10472_ebo_26_1_261219.ScanId;v=1;d1=33131.33131.3	controllerType=0 controllerNumber=1 scan=33131	68.7344
19953:3	1	S.MPLPPHPGHPGYINF.S			558.615	3	1673.83	1673.83	0	2.8	17	Non	255.19	234.18	234.18	3.15	1206	>sp|P02817|AMELX_BOVIN Amelogenin, X isoform OS=Bos taurus OX=9913 GN=AMELX PE=1 SV=2	1	hf1_10472_ebo_26_1_261219.ScanId;v=1;d1=15740.15740.3	controllerType=0 controllerNumber=1 scan=15740	36.4927
22028:2	1	S.MPLPPHPGHPGYINF.S			837.421	2	1673.83	1673.83	0	5.1	17	Non	292.44	292.44	292.44	4.19	1206	>sp|P02817|AMELX_BOVIN Amelogenin, X isoform OS=Bos taurus OX=9913 GN=AMELX PE=1 SV=2	1	hf1_10472_ebo_26_1_261219.ScanId;v=1;d1=17153.17153.3	controllerType=0 controllerNumber=1 scan=17153	38.9451
24242:3	1	S.MPLPPHPGHPGYINF.S			558.616	3	1673.83	1673.83	0	5.3	17	Non	409.21	394.62	394.62	5.35	1206	>sp|P02817|AMELX_BOVIN Amelogenin, X isoform OS=Bos taurus OX=9913 GN=AMELX PE=1 SV=2	1	hf1_10472_ebo_26_1_261219.ScanId;v=1;d1=18639.18639.3	controllerType=0 controllerNumber=1 scan=18639	41.517
23031:3	1	S.MPLPPHPGHPGYINF.S			558.618	3	1673.84	1673.83	0	8.6	17	Non	432.4	388.77	388.77	5.29	1206	>sp|P02817|AMELX_BOVIN Amelogenin, X isoform OS=Bos taurus OX=9913 GN=AMELX PE=1 SV=2	1	hf1_10472_ebo_26_1_261219.ScanId;v=1;d1=17828.17828.3	controllerType=0 controllerNumber=1 scan=17828	40.1156
24575:3	1	S.MPLPPHPGHPGYINF.S			558.616	3	1673.83	1673.83	0	4.7	17	Non	433.44	433.44	433.44	5.56	1206	>sp|P02817|AMELX_BOVIN Amelogenin, X isoform OS=Bos taurus OX=9913 GN=AMELX PE=1 SV=2	1	hf1_10472_ebo_26_1_261219.ScanId;v=1;d1=18862.18862.3	controllerType=0 controllerNumber=1 scan=18862	41.904
21865:3	1	S.MPLPPHPGHPGYINF.S			558.617	3	1673.84	1673.83	0	7.1	17	Non	441.04	415.1	415.1	5.66	1206	>sp|P02817|AMELX_BOVIN Amelogenin, X isoform OS=Bos taurus OX=9913 GN=AMELX PE=1 SV=2	1	hf1_10472_ebo_26_1_261219.ScanId;v=1;d1=17039.17039.3	controllerType=0 controllerNumber=1 scan=17039	38.7498
22439:3	1	S.MPLPPHPGHPGYINF.S			558.618	3	1673.84	1673.83	0	8.3	17	Non	478.4	443.5	443.5	5.47	1206	>sp|P02817|AMELX_BOVIN Amelogenin, X isoform OS=Bos taurus OX=9913 GN=AMELX PE=1 SV=2	1	hf1_10472_ebo_26_1_261219.ScanId;v=1;d1=17435.17435.3	controllerType=0 controllerNumber=1 scan=17435	39.4315
22739:3	1	S.MPLPPHPGHPGYINF.S			558.618	3	1673.84	1673.83	0	8.4	17	Non	478.45	435.88	435.88	5.47	1206	>sp|P02817|AMELX_BOVIN Amelogenin, X isoform OS=Bos taurus OX=9913 GN=AMELX PE=1 SV=2	1	hf1_10472_ebo_26_1_261219.ScanId;v=1;d1=17633.17633.3	controllerType=0 controllerNumber=1 scan=17633	39.7738
23393:2	1	S.MPLPPHPGHPGYINF.S			837.423	2	1673.84	1673.83	0	8.4	17	Non	479.17	423.32	423.32	5.32	1206	>sp|P02817|AMELX_BOVIN Amelogenin, X isoform OS=Bos taurus OX=9913 GN=AMELX PE=1 SV=2	1	hf1_10472_ebo_26_1_261219.ScanId;v=1;d1=18059.18059.2	controllerType=0 controllerNumber=1 scan=18059	40.5166
22153:3	1	S.MPLPPHPGHPGYINF.S			558.618	3	1673.84	1673.83	0	8.3	17	Non	491.46	433.73	433.73	5.5	1206	>sp|P02817|AMELX_BOVIN Amelogenin, X isoform OS=Bos taurus OX=9913 GN=AMELX PE=1 SV=2	1	hf1_10472_ebo_26_1_261219.ScanId;v=1;d1=17237.17237.3	controllerType=0 controllerNumber=1 scan=17237	39.0911
23083:2	1	S.MPLPPHPGHPGYINF.S			837.423	2	1673.84	1673.83	0	7.8	17	Non	535.15	451.75	451.75	6.59	1206	>sp|P02817|AMELX_BOVIN Amelogenin, X isoform OS=Bos taurus OX=9913 GN=AMELX PE=1 SV=2	1	hf1_10472_ebo_26_1_261219.ScanId;v=1;d1=17861.17861.2	controllerType=0 controllerNumber=1 scan=17861	40.1728
21614:2	1	S.MPLPPHPGHPGYINF.S			837.421	2	1673.83	1673.83	0	5.5	17	Non	614.91	505.38	505.38	7.54	1206	>sp|P02817|AMELX_BOVIN Amelogenin, X isoform OS=Bos taurus OX=9913 GN=AMELX PE=1 SV=2	1	hf1_10472_ebo_26_1_261219.ScanId;v=1;d1=16874.16874.2	controllerType=0 controllerNumber=1 scan=16874	38.4648
21914:2	1	S.MPLPPHPGHPGYINF.S			837.421	2	1673.83	1673.83	0	5.1	17	Non	683.53	587.84	587.84	9.35	1206	>sp|P02817|AMELX_BOVIN Amelogenin, X isoform OS=Bos taurus OX=9913 GN=AMELX PE=1 SV=2	1	hf1_10472_ebo_26_1_261219.ScanId;v=1;d1=17072.17072.2	controllerType=0 controllerNumber=1 scan=17072	38.8059
22787:2	1	S.MPLPPHPGHPGYINF.S			837.421	2	1673.84	1673.83	0	5.9	17	Non	707.77	613.54	613.54	10.35	1206	>sp|P02817|AMELX_BOVIN Amelogenin, X isoform OS=Bos taurus OX=9913 GN=AMELX PE=1 SV=2	1	hf1_10472_ebo_26_1_261219.ScanId;v=1;d1=17666.17666.2	controllerType=0 controllerNumber=1 scan=17666	39.8296
22202:2	1	S.MPLPPHPGHPGYINF.S			837.421	2	1673.84	1673.83	0	5.6	17	Non	710.02	627.11	627.11	10.35	1206	>sp|P02817|AMELX_BOVIN Amelogenin, X isoform OS=Bos taurus OX=9913 GN=AMELX PE=1 SV=2	1	hf1_10472_ebo_26_1_261219.ScanId;v=1;d1=17270.17270.2	controllerType=0 controllerNumber=1 scan=17270	39.148
22493:2	1	S.MPLPPHPGHPGYINF.S			837.421	2	1673.84	1673.83	0	5.6	17	Non	724.63	633.28	633.28	9.65	1206	>sp|P02817|AMELX_BOVIN Amelogenin, X isoform OS=Bos taurus OX=9913 GN=AMELX PE=1 SV=2	1	hf1_10472_ebo_26_1_261219.ScanId;v=1;d1=17468.17468.2	controllerType=0 controllerNumber=1 scan=17468	39.4893
00483:3	1	S.MP[+15.995]LPPHPGHPGYINF.S		P[+16]	563.948	3	1689.83	1689.82	0	4.6	17	Non	146.01	146.01	4	2.16	1206	>sp|P02817|AMELX_BOVIN Amelogenin, X isoform OS=Bos taurus OX=9913 GN=AMELX PE=1 SV=2	1	hf1_10472_ebo_26_1_261219.ScanId;v=1;d1=2499.2499.3	controllerType=0 controllerNumber=1 scan=2499	13.4429
46157:3	1	S.MP[+15.995]LPPHPGHPGYINF.S		P[+16]	563.947	3	1689.83	1689.82	0	3.5	17	Non	152.05	152.05	5.8	2.16	1206	>sp|P02817|AMELX_BOVIN Amelogenin, X isoform OS=Bos taurus OX=9913 GN=AMELX PE=1 SV=2	1	hf1_10472_ebo_26_1_261219.ScanId;v=1;d1=34320.34320.3	controllerType=0 controllerNumber=1 scan=34320	73.5001
18515:2	1	S.M[+15.995]PLPPHPGHPGYINF.S		M[+16]	845.419	2	1689.83	1689.82	0	5.8	17	Non	213.15	213.15	7.18	2.91	1206	>sp|P02817|AMELX_BOVIN Amelogenin, X isoform OS=Bos taurus OX=9913 GN=AMELX PE=1 SV=2	1	hf1_10472_ebo_26_1_261219.ScanId;v=1;d1=14764.14764.3	controllerType=0 controllerNumber=1 scan=14764	34.8205
16588:3	1	S.MP[+15.995]LPPHPGHPGYINF.S		P[+16]	563.949	3	1689.83	1689.82	0	7.2	17	Non	231.93	231.93	4	2.82	1206	>sp|P02817|AMELX_BOVIN Amelogenin, X isoform OS=Bos taurus OX=9913 GN=AMELX PE=1 SV=2	1	hf1_10472_ebo_26_1_261219.ScanId;v=1;d1=13460.13460.3	controllerType=0 controllerNumber=1 scan=13460	32.5675
01493:3	1	S.MP[+15.995]LPPHPGHPGYINF.S		P[+16]	563.946	3	1689.82	1689.82	0	1.7	17	Non	245.91	245.91	4	2.85	1206	>sp|P02817|AMELX_BOVIN Amelogenin, X isoform OS=Bos taurus OX=9913 GN=AMELX PE=1 SV=2	1	hf1_10472_ebo_26_1_261219.ScanId;v=1;d1=3191.3191.2	controllerType=0 controllerNumber=1 scan=3191	14.6568
22893:3	1	S.MPLP[+15.995]PHPGHPGYINF.S		P[+16]	563.948	3	1689.83	1689.82	0	5.7	17	Non	268.99	268.99	6.72	3.72	1206	>sp|P02817|AMELX_BOVIN Amelogenin, X isoform OS=Bos taurus OX=9913 GN=AMELX PE=1 SV=2	1	hf1_10472_ebo_26_1_261219.ScanId;v=1;d1=17734.17734.3	controllerType=0 controllerNumber=1 scan=17734	39.9469
21812:2	1	S.MPLPPHPGHPGY[+15.995]INF.S		Y[+16]	845.419	2	1689.83	1689.82	0	6.4	17	Non	295.69	276.27	0	3.9	1206	>sp|P02817|AMELX_BOVIN Amelogenin, X isoform OS=Bos taurus OX=9913 GN=AMELX PE=1 SV=2	1	hf1_10472_ebo_26_1_261219.ScanId;v=1;d1=17002.17002.2	controllerType=0 controllerNumber=1 scan=17002	38.6838
16852:3	1	S.MP[+15.995]LPPHPGHPGYINF.S		P[+16]	563.948	3	1689.83	1689.82	0	4.5	17	Non	303.01	303.01	4	4.22	1206	>sp|P02817|AMELX_BOVIN Amelogenin, X isoform OS=Bos taurus OX=9913 GN=AMELX PE=1 SV=2	1	hf1_10472_ebo_26_1_261219.ScanId;v=1;d1=13636.13636.3	controllerType=0 controllerNumber=1 scan=13636	32.8706
20151:3	1	S.MP[+31.990]LPPHPGHPGYINF.S		P[+32]	569.28	3	1705.83	1705.82	0	6.1	17	Non	327.72	327.72	1.8	4.32	1206	>sp|P02817|AMELX_BOVIN Amelogenin, X isoform OS=Bos taurus OX=9913 GN=AMELX PE=1 SV=2	1	hf1_10472_ebo_26_1_261219.ScanId;v=1;d1=15869.15869.3	controllerType=0 controllerNumber=1 scan=15869	36.7148
20689:3	1	S.MP[+15.995]LPPHPGHPGYINF.S		P[+16]	563.947	3	1689.83	1689.82	0	2.7	17	Non	329.41	329.41	5.8	3.9	1206	>sp|P02817|AMELX_BOVIN Amelogenin, X isoform OS=Bos taurus OX=9913 GN=AMELX PE=1 SV=2	1	hf1_10472_ebo_26_1_261219.ScanId;v=1;d1=16246.16246.3	controllerType=0 controllerNumber=1 scan=16246	37.3766
19134:2	1	S.M[+15.995]PLPPHPGHPGYINF.S		M[+16]	845.419	2	1689.83	1689.82	0	5.6	17	Non	335.39	335.39	14.51	4.59	1206	>sp|P02817|AMELX_BOVIN Amelogenin, X isoform OS=Bos taurus OX=9913 GN=AMELX PE=1 SV=2	1	hf1_10472_ebo_26_1_261219.ScanId;v=1;d1=15193.15193.3	controllerType=0 controllerNumber=1 scan=15193	35.5597
18848:2	1	S.M[+15.995]PLPPHPGHPGYINF.S		M[+16]	845.418	2	1689.83	1689.82	0	4.6	17	Non	341.13	341.13	14.46	4.59	1206	>sp|P02817|AMELX_BOVIN Amelogenin, X isoform OS=Bos taurus OX=9913 GN=AMELX PE=1 SV=2	1	hf1_10472_ebo_26_1_261219.ScanId;v=1;d1=14990.14990.3	controllerType=0 controllerNumber=1 scan=14990	35.2059
20426:3	1	S.M[+15.995]PLPPHPGHPGYINF.S		M[+16]	563.947	3	1689.83	1689.82	0	3.3	17	Non	370.93	370.93	7.96	4.91	1206	>sp|P02817|AMELX_BOVIN Amelogenin, X isoform OS=Bos taurus OX=9913 GN=AMELX PE=1 SV=2	1	hf1_10472_ebo_26_1_261219.ScanId;v=1;d1=16054.16054.3	controllerType=0 controllerNumber=1 scan=16054	37.0335
19435:2	1	S.M[+15.995]PLPPHPGHPGYINF.S		M[+16]	845.418	2	1689.83	1689.82	0	5.1	17	Non	387.51	387.51	12.7	5.3	1206	>sp|P02817|AMELX_BOVIN Amelogenin, X isoform OS=Bos taurus OX=9913 GN=AMELX PE=1 SV=2	1	hf1_10472_ebo_26_1_261219.ScanId;v=1;d1=15397.15397.3	controllerType=0 controllerNumber=1 scan=15397	35.9062
19203:3	1	S.MP[+15.995]LPPHPGHPGYINF.S		P[+16]	563.95	3	1689.84	1689.82	0	9.1	17	Non	389.83	389.83	4	5.07	1206	>sp|P02817|AMELX_BOVIN Amelogenin, X isoform OS=Bos taurus OX=9913 GN=AMELX PE=1 SV=2	1	hf1_10472_ebo_26_1_261219.ScanId;v=1;d1=15242.15242.3	controllerType=0 controllerNumber=1 scan=15242	35.6438
19819:3	1	S.MP[+15.995]LPPHPGHPGYINF.S		P[+16]	563.951	3	1689.84	1689.82	0	10	17	Non	390.39	390.39	5.8	5.07	1206	>sp|P02817|AMELX_BOVIN Amelogenin, X isoform OS=Bos taurus OX=9913 GN=AMELX PE=1 SV=2	1	hf1_10472_ebo_26_1_261219.ScanId;v=1;d1=15654.15654.3	controllerType=0 controllerNumber=1 scan=15654	36.3442
18920:3	1	S.MP[+15.995]LPPHPGHPGYINF.S		P[+16]	563.95	3	1689.83	1689.82	0	8.4	17	Non	403.57	403.57	4	5.08	1206	>sp|P02817|AMELX_BOVIN Amelogenin, X isoform OS=Bos taurus OX=9913 GN=AMELX PE=1 SV=2	1	hf1_10472_ebo_26_1_261219.ScanId;v=1;d1=15039.15039.3	controllerType=0 controllerNumber=1 scan=15039	35.2915
19515:3	1	S.MP[+15.995]LPPHPGHPGYINF.S		P[+16]	563.949	3	1689.83	1689.82	0	7.4	17	Non	424.93	424.93	5.8	5.39	1206	>sp|P02817|AMELX_BOVIN Amelogenin, X isoform OS=Bos taurus OX=9913 GN=AMELX PE=1 SV=2	1	hf1_10472_ebo_26_1_261219.ScanId;v=1;d1=15451.15451.3	controllerType=0 controllerNumber=1 scan=15451	35.9973
21280:3	1	S.MPLPPHPGHP[+15.995]GYINF.S		P[+16]	563.948	3	1689.83	1689.82	0	5.2	17	Non	425.07	425.07	6.5	5.35	1206	>sp|P02817|AMELX_BOVIN Amelogenin, X isoform OS=Bos taurus OX=9913 GN=AMELX PE=1 SV=2	1	hf1_10472_ebo_26_1_261219.ScanId;v=1;d1=16654.16654.3	controllerType=0 controllerNumber=1 scan=16654	38.0876
24243:3	1	S.MPLPPHPGHPGYIN[+0.984]F.S		N[+1]	558.946	3	1674.82	1674.81	0	8	17	Non	433.57	433.57	433.57	5.39	1206	>sp|P02817|AMELX_BOVIN Amelogenin, X isoform OS=Bos taurus OX=9913 GN=AMELX PE=1 SV=2	1	hf1_10472_ebo_26_1_261219.ScanId;v=1;d1=18639.18639.3	controllerType=0 controllerNumber=1 scan=18639	41.517
20977:3	1	S.MPLPPHP[+15.995]GHPGYINF.S		P[+16]	563.948	3	1689.83	1689.82	0	4.5	17	Non	447.97	447.97	0	5.41	1206	>sp|P02817|AMELX_BOVIN Amelogenin, X isoform OS=Bos taurus OX=9913 GN=AMELX PE=1 SV=2	1	hf1_10472_ebo_26_1_261219.ScanId;v=1;d1=16448.16448.3	controllerType=0 controllerNumber=1 scan=16448	37.7291
18570:2	1	S.M[+15.995]PLPPHPGHPGYINF.S		M[+16]	845.421	2	1689.83	1689.82	0	8.4	17	Non	467.7	348.13	20.13	4.24	1206	>sp|P02817|AMELX_BOVIN Amelogenin, X isoform OS=Bos taurus OX=9913 GN=AMELX PE=1 SV=2	1	hf1_10472_ebo_26_1_261219.ScanId;v=1;d1=14801.14801.2	controllerType=0 controllerNumber=1 scan=14801	34.8829
23645:3	1	S.MPLPPHPGHPGYIN[+0.984]F.S		N[+1]	558.945	3	1674.82	1674.81	0	6.1	17	Non	475.41	475.41	475.41	5.62	1206	>sp|P02817|AMELX_BOVIN Amelogenin, X isoform OS=Bos taurus OX=9913 GN=AMELX PE=1 SV=2	1	hf1_10472_ebo_26_1_261219.ScanId;v=1;d1=18225.18225.3	controllerType=0 controllerNumber=1 scan=18225	40.8031
19543:2	1	S.M[+15.995]PLPPHPGHPGYINF.S		M[+16]	845.418	2	1689.83	1689.82	0	5	17	Non	482.94	433.52	27.3	5.42	1206	>sp|P02817|AMELX_BOVIN Amelogenin, X isoform OS=Bos taurus OX=9913 GN=AMELX PE=1 SV=2	1	hf1_10472_ebo_26_1_261219.ScanId;v=1;d1=15470.15470.3	controllerType=0 controllerNumber=1 scan=15470	36.0313
21503:2	1	S.MPLPPHPGHP[+15.995]GYINF.S		P[+16]	845.419	2	1689.83	1689.82	0	6.3	17	Non	494.07	482.86	0	5.46	1206	>sp|P02817|AMELX_BOVIN Amelogenin, X isoform OS=Bos taurus OX=9913 GN=AMELX PE=1 SV=2	1	hf1_10472_ebo_26_1_261219.ScanId;v=1;d1=16798.16798.2	controllerType=0 controllerNumber=1 scan=16798	38.3337
23940:3	1	S.MPLPPHPGHPGYIN[+0.984]F.S		N[+1]	558.944	3	1674.82	1674.81	0	4.6	17	Non	502.82	502.82	502.82	5.77	1206	>sp|P02817|AMELX_BOVIN Amelogenin, X isoform OS=Bos taurus OX=9913 GN=AMELX PE=1 SV=2	1	hf1_10472_ebo_26_1_261219.ScanId;v=1;d1=18431.18431.3	controllerType=0 controllerNumber=1 scan=18431	41.159
21583:3	1	S.MPLPPHPGHP[+15.995]GYINF.S		P[+16]	563.948	3	1689.83	1689.82	0	5.3	17	Non	510.3	510.3	9.52	5.66	1206	>sp|P02817|AMELX_BOVIN Amelogenin, X isoform OS=Bos taurus OX=9913 GN=AMELX PE=1 SV=2	1	hf1_10472_ebo_26_1_261219.ScanId;v=1;d1=16852.16852.3	controllerType=0 controllerNumber=1 scan=16852	38.4276
23084:2	1	S.MPLPPHPGHPGYIN[+0.984]F.S		N[+1]	837.914	2	1674.82	1674.81	0	6.1	17	Non	554.62	528.43	528.43	5.73	1206	>sp|P02817|AMELX_BOVIN Amelogenin, X isoform OS=Bos taurus OX=9913 GN=AMELX PE=1 SV=2	1	hf1_10472_ebo_26_1_261219.ScanId;v=1;d1=17861.17861.2	controllerType=0 controllerNumber=1 scan=17861	40.1728
19469:2	1	S.M[+15.995]PLPPHPGHPGYINF.S		M[+16]	845.418	2	1689.83	1689.82	0	4.8	17	Non	560.79	497.81	50.39	6.65	1206	>sp|P02817|AMELX_BOVIN Amelogenin, X isoform OS=Bos taurus OX=9913 GN=AMELX PE=1 SV=2	1	hf1_10472_ebo_26_1_261219.ScanId;v=1;d1=15418.15418.2	controllerType=0 controllerNumber=1 scan=15418	35.9422
23394:2	1	S.MPLPPHPGHPGYIN[+0.984]F.S		N[+1]	837.912	2	1674.82	1674.81	0	4.2	17	Non	574.59	515.96	515.96	6.33	1206	>sp|P02817|AMELX_BOVIN Amelogenin, X isoform OS=Bos taurus OX=9913 GN=AMELX PE=1 SV=2	1	hf1_10472_ebo_26_1_261219.ScanId;v=1;d1=18059.18059.2	controllerType=0 controllerNumber=1 scan=18059	40.5166
21195:2	1	S.MPLPPHPGHP[+15.995]GYINF.S		P[+16]	845.419	2	1689.83	1689.82	0	5.7	17	Non	577.12	552.14	22.57	6.54	1206	>sp|P02817|AMELX_BOVIN Amelogenin, X isoform OS=Bos taurus OX=9913 GN=AMELX PE=1 SV=2	1	hf1_10472_ebo_26_1_261219.ScanId;v=1;d1=16596.16596.2	controllerType=0 controllerNumber=1 scan=16596	37.9844
20079:2	1	S.M[+15.995]PLPPHPGHPGYINF.S		M[+16]	845.419	2	1689.83	1689.82	0	6.2	17	Non	595.74	548.93	40.53	6.58	1206	>sp|P02817|AMELX_BOVIN Amelogenin, X isoform OS=Bos taurus OX=9913 GN=AMELX PE=1 SV=2	1	hf1_10472_ebo_26_1_261219.ScanId;v=1;d1=15822.15822.2	controllerType=0 controllerNumber=1 scan=15822	36.6361
19156:2	1	S.M[+15.995]PLPPHPGHPGYINF.S		M[+16]	845.418	2	1689.83	1689.82	0	5.4	17	Non	614.61	549.26	67.94	7.65	1206	>sp|P02817|AMELX_BOVIN Amelogenin, X isoform OS=Bos taurus OX=9913 GN=AMELX PE=1 SV=2	1	hf1_10472_ebo_26_1_261219.ScanId;v=1;d1=15209.15209.2	controllerType=0 controllerNumber=1 scan=15209	35.5893
18873:2	1	S.M[+15.995]PLPPHPGHPGYINF.S		M[+16]	845.418	2	1689.83	1689.82	0	5.2	17	Non	634.73	509.42	72.29	7.65	1206	>sp|P02817|AMELX_BOVIN Amelogenin, X isoform OS=Bos taurus OX=9913 GN=AMELX PE=1 SV=2	1	hf1_10472_ebo_26_1_261219.ScanId;v=1;d1=15007.15007.2	controllerType=0 controllerNumber=1 scan=15007	35.2361
19770:2	1	S.M[+15.995]PLPPHPGHPGYINF.S		M[+16]	845.418	2	1689.83	1689.82	0	5.3	17	Non	639.48	573.51	51.5	7.65	1206	>sp|P02817|AMELX_BOVIN Amelogenin, X isoform OS=Bos taurus OX=9913 GN=AMELX PE=1 SV=2	1	hf1_10472_ebo_26_1_261219.ScanId;v=1;d1=15623.15623.2	controllerType=0 controllerNumber=1 scan=15623	36.2901
18937:3	1	S.MP[+15.995]LPPH[+15.995]PGHPGYINF.S		H[+16], P[+16]	569.278	3	1705.82	1705.82	0	2.4	17	Non	285.7	285.7	0.71	3.61	1206	>sp|P02817|AMELX_BOVIN Amelogenin, X isoform OS=Bos taurus OX=9913 GN=AMELX PE=1 SV=2	1	hf1_10472_ebo_26_1_261219.ScanId;v=1;d1=15051.15051.3	controllerType=0 controllerNumber=1 scan=15051	35.3111
17776:3	1	S.MP[+15.995]LPPHPGHP[+15.995]GYINF.S		P[+16]*2	569.281	3	1705.83	1705.82	0	6.8	17	Non	322.95	322.95	4	4.46	1206	>sp|P02817|AMELX_BOVIN Amelogenin, X isoform OS=Bos taurus OX=9913 GN=AMELX PE=1 SV=2	1	hf1_10472_ebo_26_1_261219.ScanId;v=1;d1=14254.14254.3	controllerType=0 controllerNumber=1 scan=14254	33.9379
18062:3	1	S.MP[+15.995]LPPHPGHP[+15.995]GYINF.S		P[+16]*2	569.279	3	1705.82	1705.82	0	4.3	17	Non	329.39	329.39	4	4.41	1206	>sp|P02817|AMELX_BOVIN Amelogenin, X isoform OS=Bos taurus OX=9913 GN=AMELX PE=1 SV=2	1	hf1_10472_ebo_26_1_261219.ScanId;v=1;d1=14451.14451.3	controllerType=0 controllerNumber=1 scan=14451	34.2828
18646:3	1	S.MP[+15.995]LPPHPGHP[+15.995]GYINF.S		P[+16]*2	569.279	3	1705.82	1705.82	0	3.3	17	Non	331.41	331.41	4	3.7	1206	>sp|P02817|AMELX_BOVIN Amelogenin, X isoform OS=Bos taurus OX=9913 GN=AMELX PE=1 SV=2	1	hf1_10472_ebo_26_1_261219.ScanId;v=1;d1=14852.14852.3	controllerType=0 controllerNumber=1 scan=14852	34.9719
18357:3	1	S.MP[+15.995]LPPHPGHP[+15.995]GYINF.S		P[+16]*2	569.279	3	1705.82	1705.82	0	3.8	17	Non	358.3	358.3	4	3.99	1206	>sp|P02817|AMELX_BOVIN Amelogenin, X isoform OS=Bos taurus OX=9913 GN=AMELX PE=1 SV=2	1	hf1_10472_ebo_26_1_261219.ScanId;v=1;d1=14654.14654.3	controllerType=0 controllerNumber=1 scan=14654	34.6323
18287:2	1	S.M[+15.995]PLPPHPGHPGY[+15.995]INF.S		M[+16], Y[+16]	853.418	2	1705.83	1705.82	0	7.4	17	Non	386.55	386.55	0	5.34	1206	>sp|P02817|AMELX_BOVIN Amelogenin, X isoform OS=Bos taurus OX=9913 GN=AMELX PE=1 SV=2	1	hf1_10472_ebo_26_1_261219.ScanId;v=1;d1=14603.14603.2	controllerType=0 controllerNumber=1 scan=14603	34.5395
17763:2	1	S.M[+15.995]PLPPHPGHPGY[+15.995]INF.S		M[+16], Y[+16]	853.419	2	1705.83	1705.82	0	9	17	Non	392.15	392.15	0	4.93	1206	>sp|P02817|AMELX_BOVIN Amelogenin, X isoform OS=Bos taurus OX=9913 GN=AMELX PE=1 SV=2	1	hf1_10472_ebo_26_1_261219.ScanId;v=1;d1=14246.14246.2	controllerType=0 controllerNumber=1 scan=14246	33.9252
20545:2	1	S.MPLPPHPGHPGYINFS.Y			880.937	2	1760.87	1760.86	0	5.4	17	Non	227.64	227.64	227.64	2.46	1206	>sp|P02817|AMELX_BOVIN Amelogenin, X isoform OS=Bos taurus OX=9913 GN=AMELX PE=1 SV=2	1	hf1_10472_ebo_26_1_261219.ScanId;v=1;d1=16138.16138.4	controllerType=0 controllerNumber=1 scan=16138	37.1802
20765:3	1	S.MPLPPHPGHPGYINFS.Y			587.627	3	1760.87	1760.86	0	4.9	17	Non	237.76	160.94	160.94	2.58	1206	>sp|P02817|AMELX_BOVIN Amelogenin, X isoform OS=Bos taurus OX=9913 GN=AMELX PE=1 SV=2	1	hf1_10472_ebo_26_1_261219.ScanId;v=1;d1=16304.16304.3	controllerType=0 controllerNumber=1 scan=16304	37.4771
20233:3	1	S.MPLPPHPGHPGYINFS.Y			587.628	3	1760.87	1760.86	0	6.5	17	Non	309.21	89.44	89.44	2.52	1206	>sp|P02817|AMELX_BOVIN Amelogenin, X isoform OS=Bos taurus OX=9913 GN=AMELX PE=1 SV=2	1	hf1_10472_ebo_26_1_261219.ScanId;v=1;d1=15924.15924.3	controllerType=0 controllerNumber=1 scan=15924	36.8103
20488:2	1	S.MPLPPHPGHPGYINFS.Y			880.937	2	1760.87	1760.86	0	5	17	Non	324.84	301.25	301.25	4.26	1206	>sp|P02817|AMELX_BOVIN Amelogenin, X isoform OS=Bos taurus OX=9913 GN=AMELX PE=1 SV=2	1	hf1_10472_ebo_26_1_261219.ScanId;v=1;d1=16097.16097.2	controllerType=0 controllerNumber=1 scan=16097	37.1061
20526:3	1	S.MPLPPHPGHPGYINFS.Y			587.627	3	1760.87	1760.86	0	4.9	17	Non	410.87	189.22	189.22	3.78	1206	>sp|P02817|AMELX_BOVIN Amelogenin, X isoform OS=Bos taurus OX=9913 GN=AMELX PE=1 SV=2	1	hf1_10472_ebo_26_1_261219.ScanId;v=1;d1=16124.16124.3	controllerType=0 controllerNumber=1 scan=16124	37.1543
18810:3	1	S.MP[+15.995]LPPHPGHPGYINFS.Y		P[+16]	592.959	3	1776.86	1776.85	0	6.1	17	Non	194.86	46.67	0.21	1.43	1206	>sp|P02817|AMELX_BOVIN Amelogenin, X isoform OS=Bos taurus OX=9913 GN=AMELX PE=1 SV=2	1	hf1_10472_ebo_26_1_261219.ScanId;v=1;d1=14964.14964.3	controllerType=0 controllerNumber=1 scan=14964	35.1636
17772:3	1	S.MP[+15.995]LPPHPGHPGYINFS.Y		P[+16]	592.958	3	1776.86	1776.85	0	4.4	17	Non	207.7	207.7	2.5	2.78	1206	>sp|P02817|AMELX_BOVIN Amelogenin, X isoform OS=Bos taurus OX=9913 GN=AMELX PE=1 SV=2	1	hf1_10472_ebo_26_1_261219.ScanId;v=1;d1=14252.14252.2	controllerType=0 controllerNumber=1 scan=14252	33.9362
17845:3	1	S.MP[+15.995]LPPHPGHPGYINFS.Y		P[+16]	592.959	3	1776.86	1776.85	0	5.4	17	Non	230.64	165.48	4	2.72	1206	>sp|P02817|AMELX_BOVIN Amelogenin, X isoform OS=Bos taurus OX=9913 GN=AMELX PE=1 SV=2	1	hf1_10472_ebo_26_1_261219.ScanId;v=1;d1=14302.14302.3	controllerType=0 controllerNumber=1 scan=14302	34.0225
18438:3	1	S.MP[+15.995]LPPHPGHPGYINFS.Y		P[+16]	592.96	3	1776.87	1776.85	0	6.9	17	Non	242.1	225.31	5.8	3.59	1206	>sp|P02817|AMELX_BOVIN Amelogenin, X isoform OS=Bos taurus OX=9913 GN=AMELX PE=1 SV=2	1	hf1_10472_ebo_26_1_261219.ScanId;v=1;d1=14711.14711.3	controllerType=0 controllerNumber=1 scan=14711	34.7285
24016:3	1	S.MPLPPHPGHPGYINFS[+79.966].Y		S[+80]	614.284	3	1840.84	1840.82	0	7.4	17	Non	252.37	252.37	168.75	3.76	1206	>sp|P02817|AMELX_BOVIN Amelogenin, X isoform OS=Bos taurus OX=9913 GN=AMELX PE=1 SV=2	1	hf1_10472_ebo_26_1_261219.ScanId;v=1;d1=18483.18483.3	controllerType=0 controllerNumber=1 scan=18483	41.2465
18147:3	1	S.MP[+15.995]LPPHPGHPGYINFS.Y		P[+16]	592.959	3	1776.86	1776.85	0	5.2	17	Non	267.29	217	4	3.74	1206	>sp|P02817|AMELX_BOVIN Amelogenin, X isoform OS=Bos taurus OX=9913 GN=AMELX PE=1 SV=2	1	hf1_10472_ebo_26_1_261219.ScanId;v=1;d1=14509.14509.3	controllerType=0 controllerNumber=1 scan=14509	34.3806
21775:3	1	S.MPLPPHPGHPGYIN[+0.984]FS.Y		N[+1]	587.955	3	1761.85	1761.84	0	4.6	17	Non	269.07	167.88	167.88	3.28	1206	>sp|P02817|AMELX_BOVIN Amelogenin, X isoform OS=Bos taurus OX=9913 GN=AMELX PE=1 SV=2	1	hf1_10472_ebo_26_1_261219.ScanId;v=1;d1=16979.16979.3	controllerType=0 controllerNumber=1 scan=16979	38.6446
22375:2	1	S.MPLPPHPGHPGYINFS[+79.966].Y		S[+80]	920.921	2	1840.84	1840.82	0	6	17	Non	280.46	280.46	140.6	4.19	1206	>sp|P02817|AMELX_BOVIN Amelogenin, X isoform OS=Bos taurus OX=9913 GN=AMELX PE=1 SV=2	1	hf1_10472_ebo_26_1_261219.ScanId;v=1;d1=17389.17389.3	controllerType=0 controllerNumber=1 scan=17389	39.3493
24307:3	1	S.MPLPPHPGHPGYINFS[+79.966].Y		S[+80]	614.284	3	1840.84	1840.82	0	7.6	17	Non	291.91	291.91	188.02	4.26	1206	>sp|P02817|AMELX_BOVIN Amelogenin, X isoform OS=Bos taurus OX=9913 GN=AMELX PE=1 SV=2	1	hf1_10472_ebo_26_1_261219.ScanId;v=1;d1=18681.18681.3	controllerType=0 controllerNumber=1 scan=18681	41.5906
17193:3	1	S.MP[+15.995]LPPHPGHPGYINFS.Y		P[+16]	592.958	3	1776.86	1776.85	0	3.7	17	Non	351.82	241.13	4	3.75	1206	>sp|P02817|AMELX_BOVIN Amelogenin, X isoform OS=Bos taurus OX=9913 GN=AMELX PE=1 SV=2	1	hf1_10472_ebo_26_1_261219.ScanId;v=1;d1=13862.13862.3	controllerType=0 controllerNumber=1 scan=13862	33.2568
17299:2	1	S.M[+15.995]PLPPHPGHPGYINFS.Y		M[+16]	888.937	2	1776.87	1776.85	0	7.4	17	Non	352.7	329.49	34.79	4.42	1206	>sp|P02817|AMELX_BOVIN Amelogenin, X isoform OS=Bos taurus OX=9913 GN=AMELX PE=1 SV=2	1	hf1_10472_ebo_26_1_261219.ScanId;v=1;d1=13934.13934.2	controllerType=0 controllerNumber=1 scan=13934	33.3811
23726:3	1	S.MPLPPHPGHPGYINFS[+79.966].Y		S[+80]	614.284	3	1840.84	1840.82	0	6.6	17	Non	357.71	357.71	214.26	4.46	1206	>sp|P02817|AMELX_BOVIN Amelogenin, X isoform OS=Bos taurus OX=9913 GN=AMELX PE=1 SV=2	1	hf1_10472_ebo_26_1_261219.ScanId;v=1;d1=18279.18279.3	controllerType=0 controllerNumber=1 scan=18279	40.8947
22227:3	1	S.MPLPPHPGHPGYINFS[+79.966].Y		S[+80]	614.283	3	1840.84	1840.82	0	6	17	Non	397.83	308.45	248.97	4.35	1206	>sp|P02817|AMELX_BOVIN Amelogenin, X isoform OS=Bos taurus OX=9913 GN=AMELX PE=1 SV=2	1	hf1_10472_ebo_26_1_261219.ScanId;v=1;d1=17285.17285.3	controllerType=0 controllerNumber=1 scan=17285	39.1717
22819:3	1	S.MPLPPHPGHPGYINFS[+79.966].Y		S[+80]	614.285	3	1840.84	1840.82	0	8.4	17	Non	433.25	337.23	261.99	4.42	1206	>sp|P02817|AMELX_BOVIN Amelogenin, X isoform OS=Bos taurus OX=9913 GN=AMELX PE=1 SV=2	1	hf1_10472_ebo_26_1_261219.ScanId;v=1;d1=17688.17688.3	controllerType=0 controllerNumber=1 scan=17688	39.8675
23427:3	1	S.MPLPPHPGHPGYINFS[+79.966].Y		S[+80]	614.284	3	1840.84	1840.82	0	7.7	17	Non	437.5	437.5	244.93	5.72	1206	>sp|P02817|AMELX_BOVIN Amelogenin, X isoform OS=Bos taurus OX=9913 GN=AMELX PE=1 SV=2	1	hf1_10472_ebo_26_1_261219.ScanId;v=1;d1=18081.18081.3	controllerType=0 controllerNumber=1 scan=18081	40.5552
22526:3	1	S.MPLPPHPGHPGYINFS[+79.966].Y		S[+80]	614.284	3	1840.84	1840.82	0	7.3	17	Non	496.11	496.11	310.28	5.82	1206	>sp|P02817|AMELX_BOVIN Amelogenin, X isoform OS=Bos taurus OX=9913 GN=AMELX PE=1 SV=2	1	hf1_10472_ebo_26_1_261219.ScanId;v=1;d1=17490.17490.3	controllerType=0 controllerNumber=1 scan=17490	39.5262
23119:3	1	S.MPLPPHPGHPGYINFS[+79.966].Y		S[+80]	614.285	3	1840.84	1840.82	0	8.5	17	Non	500.55	500.55	299.4	5.5	1206	>sp|P02817|AMELX_BOVIN Amelogenin, X isoform OS=Bos taurus OX=9913 GN=AMELX PE=1 SV=2	1	hf1_10472_ebo_26_1_261219.ScanId;v=1;d1=17883.17883.3	controllerType=0 controllerNumber=1 scan=17883	40.211
23744:2	1	S.MPLPPHPGHPGYINFS[+79.966].Y		S[+80]	920.921	2	1840.83	1840.82	0	5.5	17	Non	560.65	560.65	278.51	6.65	1206	>sp|P02817|AMELX_BOVIN Amelogenin, X isoform OS=Bos taurus OX=9913 GN=AMELX PE=1 SV=2	1	hf1_10472_ebo_26_1_261219.ScanId;v=1;d1=18290.18290.2	controllerType=0 controllerNumber=1 scan=18290	40.9136
22244:2	1	S.MPLPPHPGHPGYINFS[+79.966].Y		S[+80]	920.922	2	1840.84	1840.82	0	6.6	17	Non	611.93	611.93	278.8	7.69	1206	>sp|P02817|AMELX_BOVIN Amelogenin, X isoform OS=Bos taurus OX=9913 GN=AMELX PE=1 SV=2	1	hf1_10472_ebo_26_1_261219.ScanId;v=1;d1=17296.17296.2	controllerType=0 controllerNumber=1 scan=17296	39.1911
23137:2	1	S.MPLPPHPGHPGYINFS[+79.966].Y		S[+80]	920.922	2	1840.84	1840.82	0	6.7	17	Non	649.33	491	316.89	8.4	1206	>sp|P02817|AMELX_BOVIN Amelogenin, X isoform OS=Bos taurus OX=9913 GN=AMELX PE=1 SV=2	1	hf1_10472_ebo_26_1_261219.ScanId;v=1;d1=17894.17894.2	controllerType=0 controllerNumber=1 scan=17894	40.2299
22837:2	1	S.MPLPPHPGHPGYINFS[+79.966].Y		S[+80]	920.921	2	1840.84	1840.82	0	6.3	17	Non	685.39	521.93	330.96	9.4	1206	>sp|P02817|AMELX_BOVIN Amelogenin, X isoform OS=Bos taurus OX=9913 GN=AMELX PE=1 SV=2	1	hf1_10472_ebo_26_1_261219.ScanId;v=1;d1=17699.17699.2	controllerType=0 controllerNumber=1 scan=17699	39.8866
23446:2	1	S.MPLPPHPGHPGYINFS[+79.966].Y		S[+80]	920.921	2	1840.83	1840.82	0	5.9	17	Non	690.25	690.25	373.21	9.35	1206	>sp|P02817|AMELX_BOVIN Amelogenin, X isoform OS=Bos taurus OX=9913 GN=AMELX PE=1 SV=2	1	hf1_10472_ebo_26_1_261219.ScanId;v=1;d1=18092.18092.2	controllerType=0 controllerNumber=1 scan=18092	40.5745
22543:2	1	S.MPLPPHPGHPGYINFS[+79.966].Y		S[+80]	920.921	2	1840.84	1840.82	0	6	17	Non	726.01	559.35	375.53	10.35	1206	>sp|P02817|AMELX_BOVIN Amelogenin, X isoform OS=Bos taurus OX=9913 GN=AMELX PE=1 SV=2	1	hf1_10472_ebo_26_1_261219.ScanId;v=1;d1=17501.17501.2	controllerType=0 controllerNumber=1 scan=17501	39.5455
25350:3	1	S.MPLPPHPGHPGYIN[+0.984]FS[+79.966].Y		N[+1], S[+80]	614.611	3	1841.82	1841.81	0	6	17	Non	129.99	129.99	129.99	2.16	1206	>sp|P02817|AMELX_BOVIN Amelogenin, X isoform OS=Bos taurus OX=9913 GN=AMELX PE=1 SV=2	1	hf1_10472_ebo_26_1_261219.ScanId;v=1;d1=19385.19385.3	controllerType=0 controllerNumber=1 scan=19385	42.8135
23120:3	1	S.MPLPPHPGHP[+15.995]GYINFS[+79.966].Y		P[+16], S[+80]	619.609	3	1856.81	1856.82	0	-3.7	17	Non	205.73	205.73	0	1.42	1206	>sp|P02817|AMELX_BOVIN Amelogenin, X isoform OS=Bos taurus OX=9913 GN=AMELX PE=1 SV=2	1	hf1_10472_ebo_26_1_261219.ScanId;v=1;d1=17884.17884.3	controllerType=0 controllerNumber=1 scan=17884	40.2125
25058:3	1	S.MPLPPHPGHPGYIN[+0.984]FS[+79.966].Y		N[+1], S[+80]	614.611	3	1841.82	1841.81	0	6.1	17	Non	237.81	237.81	164.43	2.94	1206	>sp|P02817|AMELX_BOVIN Amelogenin, X isoform OS=Bos taurus OX=9913 GN=AMELX PE=1 SV=2	1	hf1_10472_ebo_26_1_261219.ScanId;v=1;d1=19191.19191.3	controllerType=0 controllerNumber=1 scan=19191	42.4738
18609:3	1	S.MP[+15.995]LPPHPGHPGYINFS[+79.966].Y		P[+16], S[+80]	619.607	3	1856.81	1856.82	0	-6.9	17	Non	251.48	251.48	5.8	2.79	1206	>sp|P02817|AMELX_BOVIN Amelogenin, X isoform OS=Bos taurus OX=9913 GN=AMELX PE=1 SV=2	1	hf1_10472_ebo_26_1_261219.ScanId;v=1;d1=14827.14827.3	controllerType=0 controllerNumber=1 scan=14827	34.9261
25281:2	1	S.MPLPPHPGHPGYIN[+0.984]FS[+79.966].Y		N[+1], S[+80]	921.41	2	1841.81	1841.81	0	3.1	17	Non	262.09	262.09	172.97	3.28	1206	>sp|P02817|AMELX_BOVIN Amelogenin, X isoform OS=Bos taurus OX=9913 GN=AMELX PE=1 SV=2	1	hf1_10472_ebo_26_1_261219.ScanId;v=1;d1=19338.19338.2	controllerType=0 controllerNumber=1 scan=19338	42.7302
20688:3	1	S.MP[+15.995]LPPHPGHPGYINFS[+79.966].Y		P[+16], S[+80]	619.61	3	1856.82	1856.82	0	-1.6	17	Non	263.19	263.19	4	3.21	1206	>sp|P02817|AMELX_BOVIN Amelogenin, X isoform OS=Bos taurus OX=9913 GN=AMELX PE=1 SV=2	1	hf1_10472_ebo_26_1_261219.ScanId;v=1;d1=16245.16245.3	controllerType=0 controllerNumber=1 scan=16245	37.3759
21282:3	1	S.MP[+15.995]LPPHPGHPGYINFS[+79.966].Y		P[+16], S[+80]	619.61	3	1856.81	1856.82	0	-2.5	17	Non	276.62	276.62	5.8	2.54	1206	>sp|P02817|AMELX_BOVIN Amelogenin, X isoform OS=Bos taurus OX=9913 GN=AMELX PE=1 SV=2	1	hf1_10472_ebo_26_1_261219.ScanId;v=1;d1=16656.16656.3	controllerType=0 controllerNumber=1 scan=16656	38.0892
20976:3	1	S.M[+15.995]PLPPHPGHPGYINFS[+79.966].Y		M[+16], S[+80]	619.61	3	1856.82	1856.82	0	-1.8	17	Non	277.57	277.57	3.24	2.54	1206	>sp|P02817|AMELX_BOVIN Amelogenin, X isoform OS=Bos taurus OX=9913 GN=AMELX PE=1 SV=2	1	hf1_10472_ebo_26_1_261219.ScanId;v=1;d1=16447.16447.3	controllerType=0 controllerNumber=1 scan=16447	37.7284
46198:3	1	S.M[+15.995]PLPPHPGHPGYINFS[+79.966].Y		M[+16], S[+80]	619.616	3	1856.83	1856.82	0	8.5	17	Non	298.44	298.44	0.74	4.05	1206	>sp|P02817|AMELX_BOVIN Amelogenin, X isoform OS=Bos taurus OX=9913 GN=AMELX PE=1 SV=2	1	hf1_10472_ebo_26_1_261219.ScanId;v=1;d1=34354.34354.3	controllerType=0 controllerNumber=1 scan=34354	73.5601
20425:3	1	S.M[+15.995]PLPPHPGHPGYINFS[+79.966].Y		M[+16], S[+80]	619.611	3	1856.82	1856.82	0	-0.6	17	Non	306.91	306.91	11.19	3.5	1206	>sp|P02817|AMELX_BOVIN Amelogenin, X isoform OS=Bos taurus OX=9913 GN=AMELX PE=1 SV=2	1	hf1_10472_ebo_26_1_261219.ScanId;v=1;d1=16053.16053.3	controllerType=0 controllerNumber=1 scan=16053	37.0329
22821:3	1	S.MPLPPHPGHPGY[+15.995]INFS[+79.966].Y		S[+80], Y[+16]	619.609	3	1856.81	1856.82	0	-3.7	17	Non	313.85	313.85	0	2.68	1206	>sp|P02817|AMELX_BOVIN Amelogenin, X isoform OS=Bos taurus OX=9913 GN=AMELX PE=1 SV=2	1	hf1_10472_ebo_26_1_261219.ScanId;v=1;d1=17689.17689.3	controllerType=0 controllerNumber=1 scan=17689	39.8688
21602:3	1	S.MPLPP[+15.995]HPGHPGYINFS[+79.966].Y		P[+16], S[+80]	619.615	3	1856.83	1856.82	0	6.6	17	Non	317.43	317.43	2.8	4.26	1206	>sp|P02817|AMELX_BOVIN Amelogenin, X isoform OS=Bos taurus OX=9913 GN=AMELX PE=1 SV=2	1	hf1_10472_ebo_26_1_261219.ScanId;v=1;d1=16866.16866.3	controllerType=0 controllerNumber=1 scan=16866	38.4507
24017:3	1	S.MPLPPHPGHPGYIN[+0.984]FS[+79.966].Y		N[+1], S[+80]	614.613	3	1841.82	1841.81	0	8.5	17	Non	332.02	332.02	234.65	4.15	1206	>sp|P02817|AMELX_BOVIN Amelogenin, X isoform OS=Bos taurus OX=9913 GN=AMELX PE=1 SV=2	1	hf1_10472_ebo_26_1_261219.ScanId;v=1;d1=18483.18483.3	controllerType=0 controllerNumber=1 scan=18483	41.2465
24889:3	1	S.MPLPPHPGHPGYIN[+0.984]FS[+79.966].Y		N[+1], S[+80]	614.611	3	1841.82	1841.81	0	5.8	17	Non	337.14	337.14	238.88	4.62	1206	>sp|P02817|AMELX_BOVIN Amelogenin, X isoform OS=Bos taurus OX=9913 GN=AMELX PE=1 SV=2	1	hf1_10472_ebo_26_1_261219.ScanId;v=1;d1=19077.19077.3	controllerType=0 controllerNumber=1 scan=19077	42.2795
19186:3	1	S.M[+15.995]PLPPHPGHPGYINFS[+79.966].Y		M[+16], S[+80]	619.614	3	1856.83	1856.82	0	5.1	17	Non	341.45	341.45	8.32	4.62	1206	>sp|P02817|AMELX_BOVIN Amelogenin, X isoform OS=Bos taurus OX=9913 GN=AMELX PE=1 SV=2	1	hf1_10472_ebo_26_1_261219.ScanId;v=1;d1=15231.15231.3	controllerType=0 controllerNumber=1 scan=15231	35.6263
19499:3	1	S.M[+15.995]PLPPHPGHPGYINFS[+79.966].Y		M[+16], S[+80]	619.614	3	1856.83	1856.82	0	5.1	17	Non	348.41	348.41	6.4	4.62	1206	>sp|P02817|AMELX_BOVIN Amelogenin, X isoform OS=Bos taurus OX=9913 GN=AMELX PE=1 SV=2	1	hf1_10472_ebo_26_1_261219.ScanId;v=1;d1=15440.15440.3	controllerType=0 controllerNumber=1 scan=15440	35.9789
20112:3	1	S.M[+15.995]PLPPHPGHPGYINFS[+79.966].Y		M[+16], S[+80]	619.613	3	1856.83	1856.82	0	3.6	17	Non	356.69	356.69	18.07	4.2	1206	>sp|P02817|AMELX_BOVIN Amelogenin, X isoform OS=Bos taurus OX=9913 GN=AMELX PE=1 SV=2	1	hf1_10472_ebo_26_1_261219.ScanId;v=1;d1=15845.15845.3	controllerType=0 controllerNumber=1 scan=15845	36.6749
22205:3	1	S.MPLPPHPGHP[+15.995]GYINFS[+79.966].Y		P[+16], S[+80]	619.615	3	1856.83	1856.82	0	6.7	17	Non	364.29	364.29	2.26	5.38	1206	>sp|P02817|AMELX_BOVIN Amelogenin, X isoform OS=Bos taurus OX=9913 GN=AMELX PE=1 SV=2	1	hf1_10472_ebo_26_1_261219.ScanId;v=1;d1=17272.17272.3	controllerType=0 controllerNumber=1 scan=17272	39.1504
19802:3	1	S.M[+15.995]PLPPHPGHPGYINFS[+79.966].Y		M[+16], S[+80]	619.615	3	1856.83	1856.82	0	5.3	17	Non	374.67	374.67	7.57	5.65	1206	>sp|P02817|AMELX_BOVIN Amelogenin, X isoform OS=Bos taurus OX=9913 GN=AMELX PE=1 SV=2	1	hf1_10472_ebo_26_1_261219.ScanId;v=1;d1=15642.15642.3	controllerType=0 controllerNumber=1 scan=15642	36.3242
24600:3	1	S.MPLPPHPGHPGYIN[+0.984]FS[+79.966].Y		N[+1], S[+80]	614.611	3	1841.82	1841.81	0	5.9	17	Non	383.94	333.04	295.55	4.46	1206	>sp|P02817|AMELX_BOVIN Amelogenin, X isoform OS=Bos taurus OX=9913 GN=AMELX PE=1 SV=2	1	hf1_10472_ebo_26_1_261219.ScanId;v=1;d1=18879.18879.3	controllerType=0 controllerNumber=1 scan=18879	41.9352
18905:3	1	S.MP[+15.995]LPPHPGHPGYINFS[+79.966].Y		P[+16], S[+80]	619.614	3	1856.83	1856.82	0	5.2	17	Non	390.69	390.69	1.91	5.65	1206	>sp|P02817|AMELX_BOVIN Amelogenin, X isoform OS=Bos taurus OX=9913 GN=AMELX PE=1 SV=2	1	hf1_10472_ebo_26_1_261219.ScanId;v=1;d1=15028.15028.3	controllerType=0 controllerNumber=1 scan=15028	35.2732
21915:3	1	S.MPLPPHPGHP[+15.995]GYINFS[+79.966].Y		P[+16], S[+80]	619.615	3	1856.83	1856.82	0	6.8	17	Non	397.09	343.37	4.29	4.51	1206	>sp|P02817|AMELX_BOVIN Amelogenin, X isoform OS=Bos taurus OX=9913 GN=AMELX PE=1 SV=2	1	hf1_10472_ebo_26_1_261219.ScanId;v=1;d1=17073.17073.3	controllerType=0 controllerNumber=1 scan=17073	38.8066
21354:2	1	S.MP[+15.995]LPPHPGHPGYINFS[+79.966].Y		P[+16], S[+80]	928.911	2	1856.82	1856.82	0	-2.1	17	Non	432.1	432.1	2.63	3.95	1206	>sp|P02817|AMELX_BOVIN Amelogenin, X isoform OS=Bos taurus OX=9913 GN=AMELX PE=1 SV=2	1	hf1_10472_ebo_26_1_261219.ScanId;v=1;d1=16703.16703.2	controllerType=0 controllerNumber=1 scan=16703	38.1702
22257:2	1	S.MPLPPHPGHPGY[+15.995]INFS[+79.966].Y		S[+80], Y[+16]	928.92	2	1856.83	1856.82	0	7.8	17	Non	433.23	433.23	0	5.57	1206	>sp|P02817|AMELX_BOVIN Amelogenin, X isoform OS=Bos taurus OX=9913 GN=AMELX PE=1 SV=2	1	hf1_10472_ebo_26_1_261219.ScanId;v=1;d1=17305.17305.2	controllerType=0 controllerNumber=1 scan=17305	39.2074
18704:2	1	S.M[+15.995]PLPPHPGHPGYINFS[+79.966].Y		M[+16], S[+80]	928.92	2	1856.83	1856.82	0	7.5	17	Non	467.18	467.18	23.68	5.74	1206	>sp|P02817|AMELX_BOVIN Amelogenin, X isoform OS=Bos taurus OX=9913 GN=AMELX PE=1 SV=2	1	hf1_10472_ebo_26_1_261219.ScanId;v=1;d1=14890.14890.2	controllerType=0 controllerNumber=1 scan=14890	35.0365
21047:2	1	S.M[+15.995]PLPPHPGHPGYINFS[+79.966].Y		M[+16], S[+80]	928.912	2	1856.82	1856.82	0	-1.1	17	Non	476.54	476.54	25.04	4.87	1206	>sp|P02817|AMELX_BOVIN Amelogenin, X isoform OS=Bos taurus OX=9913 GN=AMELX PE=1 SV=2	1	hf1_10472_ebo_26_1_261219.ScanId;v=1;d1=16497.16497.2	controllerType=0 controllerNumber=1 scan=16497	37.815
24308:3	1	S.MPLPPHPGHPGYIN[+0.984]FS[+79.966].Y		N[+1], S[+80]	614.611	3	1841.82	1841.81	0	6.3	17	Non	492.28	436.14	374.2	6.52	1206	>sp|P02817|AMELX_BOVIN Amelogenin, X isoform OS=Bos taurus OX=9913 GN=AMELX PE=1 SV=2	1	hf1_10472_ebo_26_1_261219.ScanId;v=1;d1=18681.18681.3	controllerType=0 controllerNumber=1 scan=18681	41.5906
24916:2	1	S.MPLPPHPGHPGYIN[+0.984]FS[+79.966].Y		N[+1], S[+80]	921.412	2	1841.82	1841.81	0	4.4	17	Non	494.84	494.84	286.42	5.74	1206	>sp|P02817|AMELX_BOVIN Amelogenin, X isoform OS=Bos taurus OX=9913 GN=AMELX PE=1 SV=2	1	hf1_10472_ebo_26_1_261219.ScanId;v=1;d1=19092.19092.2	controllerType=0 controllerNumber=1 scan=19092	42.3049
20757:2	1	S.M[+15.995]PLPPHPGHPGYINFS[+79.966].Y		M[+16], S[+80]	928.911	2	1856.82	1856.82	0	-2.2	17	Non	509.26	509.26	19.18	4.16	1206	>sp|P02817|AMELX_BOVIN Amelogenin, X isoform OS=Bos taurus OX=9913 GN=AMELX PE=1 SV=2	1	hf1_10472_ebo_26_1_261219.ScanId;v=1;d1=16297.16297.2	controllerType=0 controllerNumber=1 scan=16297	37.465
20503:2	1	S.M[+15.995]PLPPHPGHPGYINFS[+79.966].Y		M[+16], S[+80]	928.913	2	1856.82	1856.82	0	-0.7	17	Non	532.14	532.14	27.96	5.72	1206	>sp|P02817|AMELX_BOVIN Amelogenin, X isoform OS=Bos taurus OX=9913 GN=AMELX PE=1 SV=2	1	hf1_10472_ebo_26_1_261219.ScanId;v=1;d1=16107.16107.2	controllerType=0 controllerNumber=1 scan=16107	37.1239
20193:2	1	S.M[+15.995]PLPPHPGHPGYINFS[+79.966].Y		M[+16], S[+80]	928.915	2	1856.82	1856.82	0	1.8	17	Non	545.76	545.76	17.57	4.89	1206	>sp|P02817|AMELX_BOVIN Amelogenin, X isoform OS=Bos taurus OX=9913 GN=AMELX PE=1 SV=2	1	hf1_10472_ebo_26_1_261219.ScanId;v=1;d1=15899.15899.2	controllerType=0 controllerNumber=1 scan=15899	36.7674
19280:2	1	S.M[+15.995]PLPPHPGHPGYINFS[+79.966].Y		M[+16], S[+80]	928.919	2	1856.83	1856.82	0	6.3	17	Non	560.58	560.58	24.73	7.4	1206	>sp|P02817|AMELX_BOVIN Amelogenin, X isoform OS=Bos taurus OX=9913 GN=AMELX PE=1 SV=2	1	hf1_10472_ebo_26_1_261219.ScanId;v=1;d1=15297.15297.2	controllerType=0 controllerNumber=1 scan=15297	35.7375
24619:2	1	S.MPLPPHPGHPGYIN[+0.984]FS[+79.966].Y		N[+1], S[+80]	921.412	2	1841.82	1841.81	0	4.7	17	Non	586.06	459.09	345.41	6.65	1206	>sp|P02817|AMELX_BOVIN Amelogenin, X isoform OS=Bos taurus OX=9913 GN=AMELX PE=1 SV=2	1	hf1_10472_ebo_26_1_261219.ScanId;v=1;d1=18890.18890.2	controllerType=0 controllerNumber=1 scan=18890	41.9545
23745:2	1	S.MPLPPHPGHPGYIN[+0.984]FS[+79.966].Y		N[+1], S[+80]	921.414	2	1841.82	1841.81	0	7	17	Non	602.88	602.88	282.83	7.69	1206	>sp|P02817|AMELX_BOVIN Amelogenin, X isoform OS=Bos taurus OX=9913 GN=AMELX PE=1 SV=2	1	hf1_10472_ebo_26_1_261219.ScanId;v=1;d1=18290.18290.2	controllerType=0 controllerNumber=1 scan=18290	40.9136
19000:2	1	S.M[+15.995]PLPPHPGHPGYINFS[+79.966].Y		M[+16], S[+80]	928.919	2	1856.83	1856.82	0	6.4	17	Non	618.17	618.17	48.19	7.69	1206	>sp|P02817|AMELX_BOVIN Amelogenin, X isoform OS=Bos taurus OX=9913 GN=AMELX PE=1 SV=2	1	hf1_10472_ebo_26_1_261219.ScanId;v=1;d1=15098.15098.2	controllerType=0 controllerNumber=1 scan=15098	35.3929
24326:2	1	S.MPLPPHPGHPGYIN[+0.984]FS[+79.966].Y		N[+1], S[+80]	921.414	2	1841.82	1841.81	0	6.6	17	Non	618.97	618.97	325.98	8.4	1206	>sp|P02817|AMELX_BOVIN Amelogenin, X isoform OS=Bos taurus OX=9913 GN=AMELX PE=1 SV=2	1	hf1_10472_ebo_26_1_261219.ScanId;v=1;d1=18692.18692.2	controllerType=0 controllerNumber=1 scan=18692	41.6098
19583:2	1	S.M[+15.995]PLPPHPGHPGYINFS[+79.966].Y		M[+16], S[+80]	928.919	2	1856.83	1856.82	0	6.1	17	Non	633.29	633.29	28.85	8.35	1206	>sp|P02817|AMELX_BOVIN Amelogenin, X isoform OS=Bos taurus OX=9913 GN=AMELX PE=1 SV=2	1	hf1_10472_ebo_26_1_261219.ScanId;v=1;d1=15499.15499.2	controllerType=0 controllerNumber=1 scan=15499	36.0819
19891:2	1	S.M[+15.995]PLPPHPGHPGYINFS[+79.966].Y		M[+16], S[+80]	928.92	2	1856.83	1856.82	0	7.9	17	Non	650.96	650.96	52.38	9.4	1206	>sp|P02817|AMELX_BOVIN Amelogenin, X isoform OS=Bos taurus OX=9913 GN=AMELX PE=1 SV=2	1	hf1_10472_ebo_26_1_261219.ScanId;v=1;d1=15700.15700.2	controllerType=0 controllerNumber=1 scan=15700	36.4259
24030:2	1	S.MPLPPHPGHPGYIN[+0.984]FS[+79.966].Y		N[+1], S[+80]	921.414	2	1841.82	1841.81	0	7.1	17	Non	652.35	652.35	357.43	9.4	1206	>sp|P02817|AMELX_BOVIN Amelogenin, X isoform OS=Bos taurus OX=9913 GN=AMELX PE=1 SV=2	1	hf1_10472_ebo_26_1_261219.ScanId;v=1;d1=18494.18494.2	controllerType=0 controllerNumber=1 scan=18494	41.2652
19168:2	1	S.M[+15.995]PLPPHPGHPGY[+15.995]INFS[+79.966].Y		M[+16], S[+80], Y[+16]	936.912	2	1872.82	1872.81	0	1	17	Non	177.96	177.96	0	2.24	1206	>sp|P02817|AMELX_BOVIN Amelogenin, X isoform OS=Bos taurus OX=9913 GN=AMELX PE=1 SV=2	1	hf1_10472_ebo_26_1_261219.ScanId;v=1;d1=15217.15217.2	controllerType=0 controllerNumber=1 scan=15217	35.5997
19016:3	1	S.MP[+15.995]LPPHPGHP[+15.995]GYINFS[+79.966].Y		P[+16]*2, S[+80]	624.946	3	1872.82	1872.81	0	4.6	17	Non	200.1	200.1	1.31	2.58	1206	>sp|P02817|AMELX_BOVIN Amelogenin, X isoform OS=Bos taurus OX=9913 GN=AMELX PE=1 SV=2	1	hf1_10472_ebo_26_1_261219.ScanId;v=1;d1=15110.15110.3	controllerType=0 controllerNumber=1 scan=15110	35.4127
19638:3	1	S.MP[+15.995]LPPHPGHPGY[+15.995]INFS[+79.966].Y		P[+16], S[+80], Y[+16]	624.947	3	1872.83	1872.81	0	6.4	17	Non	235.56	235.56	0	2.98	1206	>sp|P02817|AMELX_BOVIN Amelogenin, X isoform OS=Bos taurus OX=9913 GN=AMELX PE=1 SV=2	1	hf1_10472_ebo_26_1_261219.ScanId;v=1;d1=15535.15535.3	controllerType=0 controllerNumber=1 scan=15535	36.1412
23551:3	1	S.MPLPPHPGHP[+15.995]GYIN[+0.984]FS[+79.966].Y		N[+1], P[+16], S[+80]	619.943	3	1857.82	1857.8	0	7	17	Non	244.19	244.19	0	3.34	1206	>sp|P02817|AMELX_BOVIN Amelogenin, X isoform OS=Bos taurus OX=9913 GN=AMELX PE=1 SV=2	1	hf1_10472_ebo_26_1_261219.ScanId;v=1;d1=18160.18160.3	controllerType=0 controllerNumber=1 scan=18160	40.692
18728:3	1	S.MP[+15.995]LPPHPGHP[+15.995]GYINFS[+79.966].Y		P[+16]*2, S[+80]	624.947	3	1872.83	1872.81	0	6.4	17	Non	252.5	252.5	5.8	3.96	1206	>sp|P02817|AMELX_BOVIN Amelogenin, X isoform OS=Bos taurus OX=9913 GN=AMELX PE=1 SV=2	1	hf1_10472_ebo_26_1_261219.ScanId;v=1;d1=14907.14907.3	controllerType=0 controllerNumber=1 scan=14907	35.0674
18146:3	1	S.M[+15.995]PLPPHPGHPGY[+15.995]INFS[+79.966].Y		M[+16], S[+80], Y[+16]	624.947	3	1872.83	1872.81	0	6.7	17	Non	276.08	276.08	4.26	3.96	1206	>sp|P02817|AMELX_BOVIN Amelogenin, X isoform OS=Bos taurus OX=9913 GN=AMELX PE=1 SV=2	1	hf1_10472_ebo_26_1_261219.ScanId;v=1;d1=14508.14508.3	controllerType=0 controllerNumber=1 scan=14508	34.3794
23121:3	1	S.MPLPPHPGHPGY[+15.995]IN[+0.984]FS[+79.966].Y		N[+1], S[+80], Y[+16]	619.943	3	1857.81	1857.8	0	6.3	17	Non	303.84	294.85	0	4.07	1206	>sp|P02817|AMELX_BOVIN Amelogenin, X isoform OS=Bos taurus OX=9913 GN=AMELX PE=1 SV=2	1	hf1_10472_ebo_26_1_261219.ScanId;v=1;d1=17884.17884.3	controllerType=0 controllerNumber=1 scan=17884	40.2125
22777:2	1	S.MPLPPHPGHP[+15.995]GYIN[+0.984]FS[+79.966].Y		N[+1], P[+16], S[+80]	929.412	2	1857.82	1857.8	0	7.8	17	Non	325.38	298.36	0	4.01	1206	>sp|P02817|AMELX_BOVIN Amelogenin, X isoform OS=Bos taurus OX=9913 GN=AMELX PE=1 SV=2	1	hf1_10472_ebo_26_1_261219.ScanId;v=1;d1=17660.17660.3	controllerType=0 controllerNumber=1 scan=17660	39.8177
21283:3	1	S.MP[+15.995]LPPHPGHPGYIN[+0.984]FS[+79.966].Y		N[+1], P[+16], S[+80]	619.943	3	1857.81	1857.8	0	5.6	17	Non	333.05	333.05	5.8	4.41	1206	>sp|P02817|AMELX_BOVIN Amelogenin, X isoform OS=Bos taurus OX=9913 GN=AMELX PE=1 SV=2	1	hf1_10472_ebo_26_1_261219.ScanId;v=1;d1=16656.16656.3	controllerType=0 controllerNumber=1 scan=16656	38.0892
21048:2	1	S.M[+15.995]PLPPHPGHPGYIN[+0.984]FS[+79.966].Y		M[+16], N[+1], S[+80]	929.412	2	1857.82	1857.8	0	7.2	17	Non	500.75	432.47	32.27	5.78	1206	>sp|P02817|AMELX_BOVIN Amelogenin, X isoform OS=Bos taurus OX=9913 GN=AMELX PE=1 SV=2	1	hf1_10472_ebo_26_1_261219.ScanId;v=1;d1=16497.16497.2	controllerType=0 controllerNumber=1 scan=16497	37.815
25258:3	1	S.MPLPPHPGHPGYINFS[+79.966]Y.E		S[+80]	668.638	3	2003.9	2003.89	0	6.2	17	Non	192.14	100.46	100.46	1.64	1206	>sp|P02817|AMELX_BOVIN Amelogenin, X isoform OS=Bos taurus OX=9913 GN=AMELX PE=1 SV=2	1	hf1_10472_ebo_26_1_261219.ScanId;v=1;d1=19324.19324.3	controllerType=0 controllerNumber=1 scan=19324	42.7064
26540:3	1	S.MPLPPHPGHPGYINFS[+79.966]Y.E		S[+80]	668.64	3	2003.9	2003.89	0	8.5	17	Non	227.12	133.16	133.16	2.18	1206	>sp|P02817|AMELX_BOVIN Amelogenin, X isoform OS=Bos taurus OX=9913 GN=AMELX PE=1 SV=2	1	hf1_10472_ebo_26_1_261219.ScanId;v=1;d1=20174.20174.3	controllerType=0 controllerNumber=1 scan=20174	44.1737
25382:2	1	S.MPLPPHPGHPGYINFS[+79.966]Y.E		S[+80]	1002.45	2	2003.89	2003.89	0	3.5	17	Non	386.72	288.03	219.51	4.1	1206	>sp|P02817|AMELX_BOVIN Amelogenin, X isoform OS=Bos taurus OX=9913 GN=AMELX PE=1 SV=2	1	hf1_10472_ebo_26_1_261219.ScanId;v=1;d1=19404.19404.2	controllerType=0 controllerNumber=1 scan=19404	42.8448
25874:3	1	S.MPLPPHPGHPGYINFS[+79.966]Y.E		S[+80]	668.639	3	2003.9	2003.89	0	7.1	17	Non	400.17	265.07	265.07	4.28	1206	>sp|P02817|AMELX_BOVIN Amelogenin, X isoform OS=Bos taurus OX=9913 GN=AMELX PE=1 SV=2	1	hf1_10472_ebo_26_1_261219.ScanId;v=1;d1=19726.19726.3	controllerType=0 controllerNumber=1 scan=19726	43.4038
25701:2	1	S.MPLPPHPGHPGYINFS[+79.966]Y.E		S[+80]	1002.46	2	2003.9	2003.89	0	8.2	17	Non	462.64	462.64	245.26	5.32	1206	>sp|P02817|AMELX_BOVIN Amelogenin, X isoform OS=Bos taurus OX=9913 GN=AMELX PE=1 SV=2	1	hf1_10472_ebo_26_1_261219.ScanId;v=1;d1=19609.19609.2	controllerType=0 controllerNumber=1 scan=19609	43.2004
25572:3	1	S.MPLPPHPGHPGYINFS[+79.966]Y.E		S[+80]	668.639	3	2003.9	2003.89	0	6.9	17	Non	514.45	346.22	343	4.83	1206	>sp|P02817|AMELX_BOVIN Amelogenin, X isoform OS=Bos taurus OX=9913 GN=AMELX PE=1 SV=2	1	hf1_10472_ebo_26_1_261219.ScanId;v=1;d1=19529.19529.3	controllerType=0 controllerNumber=1 scan=19529	43.0635
22815:2	1	S.MP[+15.995]LPPHPGHPGYINFS[+79.966]Y.E		P[+16], S[+80]	1010.45	2	2019.89	2019.88	0	5.9	17	Non	256.7	183.17	4	3.43	1206	>sp|P02817|AMELX_BOVIN Amelogenin, X isoform OS=Bos taurus OX=9913 GN=AMELX PE=1 SV=2	1	hf1_10472_ebo_26_1_261219.ScanId;v=1;d1=17684.17684.2	controllerType=0 controllerNumber=1 scan=17684	39.8588
23077:3	1	S.MP[+15.995]LPPHPGHPGYINFS[+79.966]Y.E		P[+16], S[+80]	673.97	3	2019.9	2019.88	0	6.3	17	Non	314.11	153.65	5.8	2.95	1206	>sp|P02817|AMELX_BOVIN Amelogenin, X isoform OS=Bos taurus OX=9913 GN=AMELX PE=1 SV=2	1	hf1_10472_ebo_26_1_261219.ScanId;v=1;d1=17857.17857.3	controllerType=0 controllerNumber=1 scan=17857	40.164
22660:3	1	S.M[+15.995]PLPPHPGHPGYINFS[+79.966]Y.E		M[+16], S[+80]	673.97	3	2019.9	2019.88	0	6.3	17	Non	352.08	155.59	5.58	2.93	1206	>sp|P02817|AMELX_BOVIN Amelogenin, X isoform OS=Bos taurus OX=9913 GN=AMELX PE=1 SV=2	1	hf1_10472_ebo_26_1_261219.ScanId;v=1;d1=17578.17578.3	controllerType=0 controllerNumber=1 scan=17578	39.6773
22341:3	1	S.MPLPPHPGHPGYINFSYE.V			684.997	3	2052.98	2052.96	0	6.5	17	Non	253.8	250.66	250.66	3.34	1206	>sp|P02817|AMELX_BOVIN Amelogenin, X isoform OS=Bos taurus OX=9913 GN=AMELX PE=1 SV=2	1	hf1_10472_ebo_26_1_261219.ScanId;v=1;d1=17364.17364.3	controllerType=0 controllerNumber=1 scan=17364	39.3085
19828:3	1	S.MP[+15.995]LPPHPGHPGYINFSYE.V		P[+16]	690.33	3	2068.98	2068.96	0	8.1	17	Non	133.33	133.33	4	1.61	1206	>sp|P02817|AMELX_BOVIN Amelogenin, X isoform OS=Bos taurus OX=9913 GN=AMELX PE=1 SV=2	1	hf1_10472_ebo_26_1_261219.ScanId;v=1;d1=15659.15659.3	controllerType=0 controllerNumber=1 scan=15659	36.3517
25513:3	1	S.MPLPPHPGHPGYINFS[+79.966]YE.V		S[+80]	711.649	3	2132.93	2132.93	0	1.1	17	Non	211.53	211.53	128.33	2.27	1206	>sp|P02817|AMELX_BOVIN Amelogenin, X isoform OS=Bos taurus OX=9913 GN=AMELX PE=1 SV=2	1	hf1_10472_ebo_26_1_261219.ScanId;v=1;d1=19492.19492.3	controllerType=0 controllerNumber=1 scan=19492	42.9966
24198:3	1	S.MPLPPHPGHPGYINFS[+79.966]YE.V		S[+80]	711.653	3	2132.94	2132.93	0	6.9	17	Non	424.58	424.58	283.46	5.6	1206	>sp|P02817|AMELX_BOVIN Amelogenin, X isoform OS=Bos taurus OX=9913 GN=AMELX PE=1 SV=2	1	hf1_10472_ebo_26_1_261219.ScanId;v=1;d1=18609.18609.3	controllerType=0 controllerNumber=1 scan=18609	41.4654
24187:2	1	S.MPLPPHPGHPGYINFS[+79.966]YE.V		S[+80]	1066.98	2	2132.95	2132.93	0	9.4	17	Non	468.33	468.33	283.15	6.14	1206	>sp|P02817|AMELX_BOVIN Amelogenin, X isoform OS=Bos taurus OX=9913 GN=AMELX PE=1 SV=2	1	hf1_10472_ebo_26_1_261219.ScanId;v=1;d1=18601.18601.2	controllerType=0 controllerNumber=1 scan=18601	41.4506
25103:2	1	S.MPLPPHPGHPGYINFS[+79.966]YE.V		S[+80]	1066.97	2	2132.94	2132.93	0	5	17	Non	472.63	472.63	240.08	6.4	1206	>sp|P02817|AMELX_BOVIN Amelogenin, X isoform OS=Bos taurus OX=9913 GN=AMELX PE=1 SV=2	1	hf1_10472_ebo_26_1_261219.ScanId;v=1;d1=19220.19220.2	controllerType=0 controllerNumber=1 scan=19220	42.5257
24504:3	1	S.MPLPPHPGHPGYINFS[+79.966]YE.V		S[+80]	711.653	3	2132.94	2132.93	0	6.2	17	Non	503.57	503.57	310.48	5.82	1206	>sp|P02817|AMELX_BOVIN Amelogenin, X isoform OS=Bos taurus OX=9913 GN=AMELX PE=1 SV=2	1	hf1_10472_ebo_26_1_261219.ScanId;v=1;d1=18814.18814.3	controllerType=0 controllerNumber=1 scan=18814	41.8221
24802:2	1	S.MPLPPHPGHPGYINFS[+79.966]YE.V		S[+80]	1066.97	2	2132.94	2132.93	0	6	17	Non	559.47	559.47	289.7	6.55	1206	>sp|P02817|AMELX_BOVIN Amelogenin, X isoform OS=Bos taurus OX=9913 GN=AMELX PE=1 SV=2	1	hf1_10472_ebo_26_1_261219.ScanId;v=1;d1=19014.19014.2	controllerType=0 controllerNumber=1 scan=19014	42.1691
24492:2	1	S.MPLPPHPGHPGYINFS[+79.966]YE.V		S[+80]	1066.98	2	2132.95	2132.93	0	8.1	17	Non	622.3	622.3	334.93	8.09	1206	>sp|P02817|AMELX_BOVIN Amelogenin, X isoform OS=Bos taurus OX=9913 GN=AMELX PE=1 SV=2	1	hf1_10472_ebo_26_1_261219.ScanId;v=1;d1=18805.18805.2	controllerType=0 controllerNumber=1 scan=18805	41.8065
22808:3	1	S.MP[+15.995]LPPHPGHPGYINFS[+79.966]YE.V		P[+16], S[+80]	716.983	3	2148.93	2148.92	0	4.2	17	Non	305.73	305.73	5.8	4.22	1206	>sp|P02817|AMELX_BOVIN Amelogenin, X isoform OS=Bos taurus OX=9913 GN=AMELX PE=1 SV=2	1	hf1_10472_ebo_26_1_261219.ScanId;v=1;d1=17680.17680.3	controllerType=0 controllerNumber=1 scan=17680	39.8527
22510:3	1	S.M[+15.995]PLPPHPGHPGYINFS[+79.966]YE.V		M[+16], S[+80]	716.981	3	2148.93	2148.92	0	1.6	17	Non	367.93	367.93	19.54	4.28	1206	>sp|P02817|AMELX_BOVIN Amelogenin, X isoform OS=Bos taurus OX=9913 GN=AMELX PE=1 SV=2	1	hf1_10472_ebo_26_1_261219.ScanId;v=1;d1=17479.17479.3	controllerType=0 controllerNumber=1 scan=17479	39.5079
22187:2	1	S.M[+15.995]PLPPHPGHPGYINFS[+79.966]YE.V		M[+16], S[+80]	1074.97	2	2148.94	2148.92	0	4.9	17	Non	368.98	368.98	20.11	5.51	1206	>sp|P02817|AMELX_BOVIN Amelogenin, X isoform OS=Bos taurus OX=9913 GN=AMELX PE=1 SV=2	1	hf1_10472_ebo_26_1_261219.ScanId;v=1;d1=17260.17260.2	controllerType=0 controllerNumber=1 scan=17260	39.1302
21275:2	1	S.M[+15.995]PLPPHPGHPGYINFS[+79.966]YE.V		M[+16], S[+80]	1074.98	2	2148.94	2148.92	0	8.9	17	Non	370.6	370.6	28.37	5.35	1206	>sp|P02817|AMELX_BOVIN Amelogenin, X isoform OS=Bos taurus OX=9913 GN=AMELX PE=1 SV=2	1	hf1_10472_ebo_26_1_261219.ScanId;v=1;d1=16649.16649.2	controllerType=0 controllerNumber=1 scan=16649	38.0773
21901:2	1	S.M[+15.995]PLPPHPGHPGYINFS[+79.966]YE.V		M[+16], S[+80]	1074.97	2	2148.94	2148.92	0	6.5	17	Non	407.02	407.02	41.27	5.68	1206	>sp|P02817|AMELX_BOVIN Amelogenin, X isoform OS=Bos taurus OX=9913 GN=AMELX PE=1 SV=2	1	hf1_10472_ebo_26_1_261219.ScanId;v=1;d1=17062.17062.2	controllerType=0 controllerNumber=1 scan=17062	38.7883
21929:3	1	S.M[+15.995]PLPPHPGHPGYINFS[+79.966]YE.V		M[+16], S[+80]	716.984	3	2148.94	2148.92	0	5.3	17	Non	428.72	428.72	29.84	5.67	1206	>sp|P02817|AMELX_BOVIN Amelogenin, X isoform OS=Bos taurus OX=9913 GN=AMELX PE=1 SV=2	1	hf1_10472_ebo_26_1_261219.ScanId;v=1;d1=17083.17083.3	controllerType=0 controllerNumber=1 scan=17083	38.8244
21324:3	1	S.M[+15.995]PLPPHPGHPGYINFS[+79.966]YE.V		M[+16], S[+80]	716.984	3	2148.94	2148.92	0	6.2	17	Non	432.36	432.36	19.86	5.6	1206	>sp|P02817|AMELX_BOVIN Amelogenin, X isoform OS=Bos taurus OX=9913 GN=AMELX PE=1 SV=2	1	hf1_10472_ebo_26_1_261219.ScanId;v=1;d1=16684.16684.3	controllerType=0 controllerNumber=1 scan=16684	38.1361
21587:2	1	S.M[+15.995]PLPPHPGHPGYINFS[+79.966]YE.V		M[+16], S[+80]	1074.97	2	2148.94	2148.92	0	7.7	17	Non	447.8	447.8	30.02	5.74	1206	>sp|P02817|AMELX_BOVIN Amelogenin, X isoform OS=Bos taurus OX=9913 GN=AMELX PE=1 SV=2	1	hf1_10472_ebo_26_1_261219.ScanId;v=1;d1=16854.16854.2	controllerType=0 controllerNumber=1 scan=16854	38.4306
22220:3	1	S.M[+15.995]PLPPHPGHPGYINFS[+79.966]YE.V		M[+16], S[+80]	716.983	3	2148.93	2148.92	0	3.9	17	Non	455.98	455.98	19.52	5.2	1206	>sp|P02817|AMELX_BOVIN Amelogenin, X isoform OS=Bos taurus OX=9913 GN=AMELX PE=1 SV=2	1	hf1_10472_ebo_26_1_261219.ScanId;v=1;d1=17281.17281.3	controllerType=0 controllerNumber=1 scan=17281	39.1667
21632:3	1	S.M[+15.995]PLPPHPGHPGYINFS[+79.966]YE.V		M[+16], S[+80]	716.984	3	2148.94	2148.92	0	5.8	17	Non	472.08	472.08	32.72	6.44	1206	>sp|P02817|AMELX_BOVIN Amelogenin, X isoform OS=Bos taurus OX=9913 GN=AMELX PE=1 SV=2	1	hf1_10472_ebo_26_1_261219.ScanId;v=1;d1=16885.16885.3	controllerType=0 controllerNumber=1 scan=16885	38.4841
30083:2	1	S.MPLPPHPGHPGYINFS[+79.966]YEVL.T		S[+80]	1173.05	2	2345.1	2345.08	0	7.6	17	Non	302.67	302.67	191.38	4.23	1206	>sp|P02817|AMELX_BOVIN Amelogenin, X isoform OS=Bos taurus OX=9913 GN=AMELX PE=1 SV=2	1	hf1_10472_ebo_26_1_261219.ScanId;v=1;d1=22616.22616.2	controllerType=0 controllerNumber=1 scan=22616	48.436
30049:3	1	S.MPLPPHPGHPGYINFS[+79.966]YEVL.T		S[+80]	782.37	3	2345.1	2345.08	0	5.6	17	Non	315.18	315.18	153.47	4.02	1206	>sp|P02817|AMELX_BOVIN Amelogenin, X isoform OS=Bos taurus OX=9913 GN=AMELX PE=1 SV=2	1	hf1_10472_ebo_26_1_261219.ScanId;v=1;d1=22594.22594.3	controllerType=0 controllerNumber=1 scan=22594	48.398
30364:3	1	S.MPLPPHPGHPGYINFS[+79.966]YEVL.T		S[+80]	782.371	3	2345.1	2345.08	0	6.7	17	Non	361.03	361.03	141.4	5.28	1206	>sp|P02817|AMELX_BOVIN Amelogenin, X isoform OS=Bos taurus OX=9913 GN=AMELX PE=1 SV=2	1	hf1_10472_ebo_26_1_261219.ScanId;v=1;d1=22815.22815.3	controllerType=0 controllerNumber=1 scan=22815	48.7859
30367:2	1	S.MPLPPHPGHPGYINFS[+79.966]YEVL.T		S[+80]	1173.05	2	2345.09	2345.08	0	5.2	17	Non	423.53	423.53	245.94	5.32	1206	>sp|P02817|AMELX_BOVIN Amelogenin, X isoform OS=Bos taurus OX=9913 GN=AMELX PE=1 SV=2	1	hf1_10472_ebo_26_1_261219.ScanId;v=1;d1=22817.22817.2	controllerType=0 controllerNumber=1 scan=22817	48.7887
28614:3	1	S.MP[+15.995]LPPHPGHPGYINFS[+79.966]YEVL.T		P[+16], S[+80]	787.703	3	2361.09	2361.08	0	7	17	Non	212.01	212.01	7.3	2.51	1206	>sp|P02817|AMELX_BOVIN Amelogenin, X isoform OS=Bos taurus OX=9913 GN=AMELX PE=1 SV=2	1	hf1_10472_ebo_26_1_261219.ScanId;v=1;d1=21604.21604.5	controllerType=0 controllerNumber=1 scan=21604	46.6713
28242:2	1	S.M[+15.995]PLPPHPGHPGYINFS[+79.966]YEVL.T		M[+16], S[+80]	1181.05	2	2361.1	2361.08	0	8	17	Non	339.81	339.81	11.46	4.42	1206	>sp|P02817|AMELX_BOVIN Amelogenin, X isoform OS=Bos taurus OX=9913 GN=AMELX PE=1 SV=2	1	hf1_10472_ebo_26_1_261219.ScanId;v=1;d1=21353.21353.2	controllerType=0 controllerNumber=1 scan=21353	46.2314
28336:3	1	S.MPLPPHPGHPGYINFSYEVLTP.L			821.75	3	2463.23	2463.22	0	7	17	Non	321.63	314.68	314.68	4.74	1206	>sp|P02817|AMELX_BOVIN Amelogenin, X isoform OS=Bos taurus OX=9913 GN=AMELX PE=1 SV=2	1	hf1_10472_ebo_26_1_261219.ScanId;v=1;d1=21418.21418.3	controllerType=0 controllerNumber=1 scan=21418	46.3456
30263:2	1	S.MPLPPHPGHPGYINFS[+79.966]YEVLTP.L		S[+80]	1272.1	2	2543.19	2543.18	0	4.3	17	Non	182.86	182.86	71.83	2.59	1206	>sp|P02817|AMELX_BOVIN Amelogenin, X isoform OS=Bos taurus OX=9913 GN=AMELX PE=1 SV=2	1	hf1_10472_ebo_26_1_261219.ScanId;v=1;d1=22743.22743.2	controllerType=0 controllerNumber=1 scan=22743	48.6595
26881:3	1	S.MP[+15.995]LPPHPGHPGYINFSYEVLTP.L		P[+16]	827.081	3	2479.23	2479.21	0	6.8	17	Non	199.33	199.33	4	2.99	1206	>sp|P02817|AMELX_BOVIN Amelogenin, X isoform OS=Bos taurus OX=9913 GN=AMELX PE=1 SV=2	1	hf1_10472_ebo_26_1_261219.ScanId;v=1;d1=20406.20406.3	controllerType=0 controllerNumber=1 scan=20406	44.5757
29973:2	1	S.MPLPPHPGHPGYINFS[+79.966]YEVLTP.L		S[+80]	1272.1	2	2543.2	2543.18	0	5.6	17	Non	224.17	224.17	38.51	3.17	1206	>sp|P02817|AMELX_BOVIN Amelogenin, X isoform OS=Bos taurus OX=9913 GN=AMELX PE=1 SV=2	1	hf1_10472_ebo_26_1_261219.ScanId;v=1;d1=22537.22537.2	controllerType=0 controllerNumber=1 scan=22537	48.2978
30558:3	1	S.MPLPPHPGHPGYINFS[+79.966]YEVLTP.L		S[+80]	848.405	3	2543.2	2543.18	0	6.8	17	Non	299.15	299.15	83.09	4.56	1206	>sp|P02817|AMELX_BOVIN Amelogenin, X isoform OS=Bos taurus OX=9913 GN=AMELX PE=1 SV=2	1	hf1_10472_ebo_26_1_261219.ScanId;v=1;d1=22942.22942.3	controllerType=0 controllerNumber=1 scan=22942	49.007
30259:3	1	S.MPLPPHPGHPGYINFS[+79.966]YEVLTP.L		S[+80]	848.404	3	2543.2	2543.18	0	6	17	Non	334.77	334.77	108.08	4.91	1206	>sp|P02817|AMELX_BOVIN Amelogenin, X isoform OS=Bos taurus OX=9913 GN=AMELX PE=1 SV=2	1	hf1_10472_ebo_26_1_261219.ScanId;v=1;d1=22740.22740.3	controllerType=0 controllerNumber=1 scan=22740	48.6552
29985:3	1	S.MPLPPHPGHPGYINFS[+79.966]YEVLTP.L		S[+80]	848.404	3	2543.2	2543.18	0	5.7	17	Non	359.56	359.56	101.58	4.81	1206	>sp|P02817|AMELX_BOVIN Amelogenin, X isoform OS=Bos taurus OX=9913 GN=AMELX PE=1 SV=2	1	hf1_10472_ebo_26_1_261219.ScanId;v=1;d1=22546.22546.3	controllerType=0 controllerNumber=1 scan=22546	48.3141
30854:3	1	S.MPLPPHPGHPGYIN[+0.984]FS[+79.966]YEVLTP.L		N[+1], S[+80]	848.735	3	2544.19	2544.17	0	9.2	17	Non	261.78	261.78	98.45	3.94	1206	>sp|P02817|AMELX_BOVIN Amelogenin, X isoform OS=Bos taurus OX=9913 GN=AMELX PE=1 SV=2	1	hf1_10472_ebo_26_1_261219.ScanId;v=1;d1=23143.23143.3	controllerType=0 controllerNumber=1 scan=23143	49.3646
28011:3	1	S.MP[+15.995]LPPHPGHPGYINFS[+79.966]YEVLTP.L		P[+16], S[+80]	853.737	3	2559.2	2559.18	0	7	17	Non	297.96	297.96	11.76	4.56	1206	>sp|P02817|AMELX_BOVIN Amelogenin, X isoform OS=Bos taurus OX=9913 GN=AMELX PE=1 SV=2	1	hf1_10472_ebo_26_1_261219.ScanId;v=1;d1=21197.21197.3	controllerType=0 controllerNumber=1 scan=21197	45.9589
29169:4	1	S.MPLPPHPGHPGYINFSYEVLTPL.K			644.835	4	2576.32	2576.3	0	6.3	17	Non	116.61	103.87	103.87	1.65	1206	>sp|P02817|AMELX_BOVIN Amelogenin, X isoform OS=Bos taurus OX=9913 GN=AMELX PE=1 SV=2	1	hf1_10472_ebo_26_1_261219.ScanId;v=1;d1=21988.21988.4	controllerType=0 controllerNumber=1 scan=21988	47.3388
46165:3	1	S.MPLPPHPGHPGYINFSYEVLTPL.K			859.444	3	2576.32	2576.3	0	6.5	17	Non	123.1	123.1	123.1	2.55	1206	>sp|P02817|AMELX_BOVIN Amelogenin, X isoform OS=Bos taurus OX=9913 GN=AMELX PE=1 SV=2	1	hf1_10472_ebo_26_1_261219.ScanId;v=1;d1=34328.34328.3	controllerType=0 controllerNumber=1 scan=34328	73.5153
31573:3	1	S.MPLPPHPGHPGYINFSYEVLTPL.K			859.443	3	2576.31	2576.3	0	5.4	17	Non	489.48	392.34	392.34	6.27	1206	>sp|P02817|AMELX_BOVIN Amelogenin, X isoform OS=Bos taurus OX=9913 GN=AMELX PE=1 SV=2	1	hf1_10472_ebo_26_1_261219.ScanId;v=1;d1=23612.23612.3	controllerType=0 controllerNumber=1 scan=23612	50.1879
46143:4	1	S.MPLPPHPGHPGYINFS[+79.966]YEVLTPL.K		S[+80]	664.826	4	2656.28	2656.27	0	6.1	17	Non	105.23	105.23	16.02	1.65	1206	>sp|P02817|AMELX_BOVIN Amelogenin, X isoform OS=Bos taurus OX=9913 GN=AMELX PE=1 SV=2	1	hf1_10472_ebo_26_1_261219.ScanId;v=1;d1=34311.34311.4	controllerType=0 controllerNumber=1 scan=34311	73.4835
44606:3	1	S.MPLPPHPGHPGYINFS[+79.966]YEVLTPL.K		S[+80]	886.1	3	2656.28	2656.27	0	6.8	17	Non	131.15	131.15	11.75	2.38	1206	>sp|P02817|AMELX_BOVIN Amelogenin, X isoform OS=Bos taurus OX=9913 GN=AMELX PE=1 SV=2	1	hf1_10472_ebo_26_1_261219.ScanId;v=1;d1=32296.32296.3	controllerType=0 controllerNumber=1 scan=32296	65.913
39339:3	1	S.MPLPPHPGHPGYINFS[+79.966]YEVLTPL.K		S[+80]	886.097	3	2656.28	2656.27	0	3.8	17	Non	138.67	138.67	25.8	2.17	1206	>sp|P02817|AMELX_BOVIN Amelogenin, X isoform OS=Bos taurus OX=9913 GN=AMELX PE=1 SV=2	1	hf1_10472_ebo_26_1_261219.ScanId;v=1;d1=28772.28772.3	controllerType=0 controllerNumber=1 scan=28772	59.3958
44255:3	1	S.MPLPPHPGHPGYINFS[+79.966]YEVLTPL.K		S[+80]	886.101	3	2656.29	2656.27	0	7.7	17	Non	146.53	146.53	28.1	2.49	1206	>sp|P02817|AMELX_BOVIN Amelogenin, X isoform OS=Bos taurus OX=9913 GN=AMELX PE=1 SV=2	1	hf1_10472_ebo_26_1_261219.ScanId;v=1;d1=32023.32023.3	controllerType=0 controllerNumber=1 scan=32023	65.2286
44401:3	1	S.MPLPPHPGHPGYINFS[+79.966]YEVLTPL.K		S[+80]	886.1	3	2656.28	2656.27	0	6.4	17	Non	149.28	149.28	59.99	2.49	1206	>sp|P02817|AMELX_BOVIN Amelogenin, X isoform OS=Bos taurus OX=9913 GN=AMELX PE=1 SV=2	1	hf1_10472_ebo_26_1_261219.ScanId;v=1;d1=32146.32146.3	controllerType=0 controllerNumber=1 scan=32146	65.566
42221:3	1	S.MPLPPHPGHPGYINFS[+79.966]YEVLTPL.K		S[+80]	886.1	3	2656.28	2656.27	0	6.6	17	Non	153.94	153.94	20.08	2.38	1206	>sp|P02817|AMELX_BOVIN Amelogenin, X isoform OS=Bos taurus OX=9913 GN=AMELX PE=1 SV=2	1	hf1_10472_ebo_26_1_261219.ScanId;v=1;d1=30654.30654.3	controllerType=0 controllerNumber=1 scan=30654	62.7613
39636:3	1	S.MPLPPHPGHPGYINFS[+79.966]YEVLTPL.K		S[+80]	886.096	3	2656.27	2656.27	0	1.9	17	Non	160.82	160.82	14.98	2.21	1206	>sp|P02817|AMELX_BOVIN Amelogenin, X isoform OS=Bos taurus OX=9913 GN=AMELX PE=1 SV=2	1	hf1_10472_ebo_26_1_261219.ScanId;v=1;d1=28964.28964.3	controllerType=0 controllerNumber=1 scan=28964	59.7386
43370:3	1	S.MPLPPHPGHPGYINFS[+79.966]YEVLTPL.K		S[+80]	886.1	3	2656.29	2656.27	0	6.8	17	Non	175.33	175.33	1.74	2.99	1206	>sp|P02817|AMELX_BOVIN Amelogenin, X isoform OS=Bos taurus OX=9913 GN=AMELX PE=1 SV=2	1	hf1_10472_ebo_26_1_261219.ScanId;v=1;d1=31403.31403.3	controllerType=0 controllerNumber=1 scan=31403	64.098
40248:3	1	S.MPLPPHPGHPGYINFS[+79.966]YEVLTPL.K		S[+80]	886.098	3	2656.28	2656.27	0	5	17	Non	188.74	188.74	35.58	2.95	1206	>sp|P02817|AMELX_BOVIN Amelogenin, X isoform OS=Bos taurus OX=9913 GN=AMELX PE=1 SV=2	1	hf1_10472_ebo_26_1_261219.ScanId;v=1;d1=29360.29360.3	controllerType=0 controllerNumber=1 scan=29360	60.4435
40546:3	1	S.MPLPPHPGHPGYINFS[+79.966]YEVLTPL.K		S[+80]	886.1	3	2656.29	2656.27	0	7	17	Non	190.27	190.27	72.85	2.99	1206	>sp|P02817|AMELX_BOVIN Amelogenin, X isoform OS=Bos taurus OX=9913 GN=AMELX PE=1 SV=2	1	hf1_10472_ebo_26_1_261219.ScanId;v=1;d1=29557.29557.3	controllerType=0 controllerNumber=1 scan=29557	60.7943
41916:3	1	S.MPLPPHPGHPGYINFS[+79.966]YEVLTPL.K		S[+80]	886.099	3	2656.28	2656.27	0	5.7	17	Non	197.66	197.66	31.03	2.95	1206	>sp|P02817|AMELX_BOVIN Amelogenin, X isoform OS=Bos taurus OX=9913 GN=AMELX PE=1 SV=2	1	hf1_10472_ebo_26_1_261219.ScanId;v=1;d1=30457.30457.3	controllerType=0 controllerNumber=1 scan=30457	62.4081
37584:3	1	S.MPLPPHPGHPGYINFS[+79.966]YEVLTPL.K		S[+80]	886.1	3	2656.29	2656.27	0	7	17	Non	200.64	200.64	60.05	2.86	1206	>sp|P02817|AMELX_BOVIN Amelogenin, X isoform OS=Bos taurus OX=9913 GN=AMELX PE=1 SV=2	1	hf1_10472_ebo_26_1_261219.ScanId;v=1;d1=27618.27618.3	controllerType=0 controllerNumber=1 scan=27618	57.329
33216:4	1	S.MPLPPHPGHPGYINFS[+79.966]YEVLTPL.K		S[+80]	664.826	4	2656.28	2656.27	0	5.4	17	Non	210.68	210.68	53.76	2.61	1206	>sp|P02817|AMELX_BOVIN Amelogenin, X isoform OS=Bos taurus OX=9913 GN=AMELX PE=1 SV=2	1	hf1_10472_ebo_26_1_261219.ScanId;v=1;d1=24689.24689.4	controllerType=0 controllerNumber=1 scan=24689	52.0901
40837:3	1	S.MPLPPHPGHPGYINFS[+79.966]YEVLTPL.K		S[+80]	886.099	3	2656.28	2656.27	0	5.9	17	Non	216.49	216.49	21.25	3.21	1206	>sp|P02817|AMELX_BOVIN Amelogenin, X isoform OS=Bos taurus OX=9913 GN=AMELX PE=1 SV=2	1	hf1_10472_ebo_26_1_261219.ScanId;v=1;d1=29751.29751.3	controllerType=0 controllerNumber=1 scan=29751	61.1411
44012:3	1	S.MPLPPHPGHPGYINFS[+79.966]YEVLTPL.K		S[+80]	886.1	3	2656.28	2656.27	0	6.4	17	Non	223.54	223.54	29.83	3.53	1206	>sp|P02817|AMELX_BOVIN Amelogenin, X isoform OS=Bos taurus OX=9913 GN=AMELX PE=1 SV=2	1	hf1_10472_ebo_26_1_261219.ScanId;v=1;d1=31842.31842.3	controllerType=0 controllerNumber=1 scan=31842	64.8836
33798:4	1	S.MPLPPHPGHPGYINFS[+79.966]YEVLTPL.K		S[+80]	664.826	4	2656.28	2656.27	0	5.8	17	Non	225.26	225.26	73.18	2.61	1206	>sp|P02817|AMELX_BOVIN Amelogenin, X isoform OS=Bos taurus OX=9913 GN=AMELX PE=1 SV=2	1	hf1_10472_ebo_26_1_261219.ScanId;v=1;d1=25084.25084.4	controllerType=0 controllerNumber=1 scan=25084	52.7887
41139:3	1	S.MPLPPHPGHPGYINFS[+79.966]YEVLTPL.K		S[+80]	886.1	3	2656.29	2656.27	0	7.4	17	Non	238.35	238.35	31.45	3.25	1206	>sp|P02817|AMELX_BOVIN Amelogenin, X isoform OS=Bos taurus OX=9913 GN=AMELX PE=1 SV=2	1	hf1_10472_ebo_26_1_261219.ScanId;v=1;d1=29950.29950.3	controllerType=0 controllerNumber=1 scan=29950	61.4966
43725:3	1	S.MPLPPHPGHPGYINFS[+79.966]YEVLTPL.K		S[+80]	886.1	3	2656.29	2656.27	0	7.4	17	Non	247.07	247.07	61.49	4.45	1206	>sp|P02817|AMELX_BOVIN Amelogenin, X isoform OS=Bos taurus OX=9913 GN=AMELX PE=1 SV=2	1	hf1_10472_ebo_26_1_261219.ScanId;v=1;d1=31644.31644.3	controllerType=0 controllerNumber=1 scan=31644	64.5278
33510:4	1	S.MPLPPHPGHPGYINFS[+79.966]YEVLTPL.K		S[+80]	664.826	4	2656.28	2656.27	0	5.5	17	Non	253.38	253.38	92.41	3.49	1206	>sp|P02817|AMELX_BOVIN Amelogenin, X isoform OS=Bos taurus OX=9913 GN=AMELX PE=1 SV=2	1	hf1_10472_ebo_26_1_261219.ScanId;v=1;d1=24886.24886.4	controllerType=0 controllerNumber=1 scan=24886	52.4372
42530:3	1	S.MPLPPHPGHPGYINFS[+79.966]YEVLTPL.K		S[+80]	886.099	3	2656.28	2656.27	0	5.7	17	Non	261.51	261.51	66.12	4.41	1206	>sp|P02817|AMELX_BOVIN Amelogenin, X isoform OS=Bos taurus OX=9913 GN=AMELX PE=1 SV=2	1	hf1_10472_ebo_26_1_261219.ScanId;v=1;d1=30854.30854.3	controllerType=0 controllerNumber=1 scan=30854	63.1187
36799:3	1	S.MPLPPHPGHPGYINFS[+79.966]YEVLTPL.K		S[+80]	886.1	3	2656.28	2656.27	0	6.3	17	Non	262.28	262.28	35.14	3.81	1206	>sp|P02817|AMELX_BOVIN Amelogenin, X isoform OS=Bos taurus OX=9913 GN=AMELX PE=1 SV=2	1	hf1_10472_ebo_26_1_261219.ScanId;v=1;d1=27107.27107.3	controllerType=0 controllerNumber=1 scan=27107	56.4195
33555:3	1	S.MPLPPHPGHPGYINFS[+79.966]YEVLTPL.K		S[+80]	886.099	3	2656.28	2656.27	0	5.8	17	Non	267.54	267.54	48.3	4.21	1206	>sp|P02817|AMELX_BOVIN Amelogenin, X isoform OS=Bos taurus OX=9913 GN=AMELX PE=1 SV=2	1	hf1_10472_ebo_26_1_261219.ScanId;v=1;d1=24917.24917.3	controllerType=0 controllerNumber=1 scan=24917	52.4951
35910:3	1	S.MPLPPHPGHPGYINFS[+79.966]YEVLTPL.K		S[+80]	886.099	3	2656.28	2656.27	0	6	17	Non	277.79	277.79	110.95	4.21	1206	>sp|P02817|AMELX_BOVIN Amelogenin, X isoform OS=Bos taurus OX=9913 GN=AMELX PE=1 SV=2	1	hf1_10472_ebo_26_1_261219.ScanId;v=1;d1=26521.26521.3	controllerType=0 controllerNumber=1 scan=26521	55.3708
31719:3	1	S.MP[+15.995]LPPHPGHPGYINFSYEVLTPL.K		P[+16]	864.775	3	2592.31	2592.3	0	5.8	17	Non	282.68	231.89	5.8	4.41	1206	>sp|P02817|AMELX_BOVIN Amelogenin, X isoform OS=Bos taurus OX=9913 GN=AMELX PE=1 SV=2	1	hf1_10472_ebo_26_1_261219.ScanId;v=1;d1=23706.23706.3	controllerType=0 controllerNumber=1 scan=23706	50.357
31804:3	1	S.MPLPP[+15.995]HPGHPGYINFSYEVLTPL.K		P[+16]	864.776	3	2592.31	2592.3	0	7	17	Non	289.43	251.78	0	4.63	1206	>sp|P02817|AMELX_BOVIN Amelogenin, X isoform OS=Bos taurus OX=9913 GN=AMELX PE=1 SV=2	1	hf1_10472_ebo_26_1_261219.ScanId;v=1;d1=23765.23765.5	controllerType=0 controllerNumber=1 scan=23765	50.4588
36200:3	1	S.MPLPPHPGHPGYINFS[+79.966]YEVLTPL.K		S[+80]	886.101	3	2656.29	2656.27	0	7.9	17	Non	291.51	291.51	82.12	4.56	1206	>sp|P02817|AMELX_BOVIN Amelogenin, X isoform OS=Bos taurus OX=9913 GN=AMELX PE=1 SV=2	1	hf1_10472_ebo_26_1_261219.ScanId;v=1;d1=26712.26712.3	controllerType=0 controllerNumber=1 scan=26712	55.7152
29499:3	1	S.MP[+15.995]LPPHPGHPGYINFSYEVLTPL.K		P[+16]	864.774	3	2592.31	2592.3	0	5.1	17	Non	293.41	293.41	5.8	4.71	1206	>sp|P02817|AMELX_BOVIN Amelogenin, X isoform OS=Bos taurus OX=9913 GN=AMELX PE=1 SV=2	1	hf1_10472_ebo_26_1_261219.ScanId;v=1;d1=22207.22207.3	controllerType=0 controllerNumber=1 scan=22207	47.7227
36504:3	1	S.MPLPPHPGHPGYINFS[+79.966]YEVLTPL.K		S[+80]	886.099	3	2656.28	2656.27	0	5.7	17	Non	294.44	294.44	49.18	4.51	1206	>sp|P02817|AMELX_BOVIN Amelogenin, X isoform OS=Bos taurus OX=9913 GN=AMELX PE=1 SV=2	1	hf1_10472_ebo_26_1_261219.ScanId;v=1;d1=26911.26911.3	controllerType=0 controllerNumber=1 scan=26911	56.0665
43434:3	1	S.MPLPPHPGHPGYINFS[+79.966]YEVLTPL.K		S[+80]	886.1	3	2656.29	2656.27	0	7.2	17	Non	296.96	296.96	86.52	4.76	1206	>sp|P02817|AMELX_BOVIN Amelogenin, X isoform OS=Bos taurus OX=9913 GN=AMELX PE=1 SV=2	1	hf1_10472_ebo_26_1_261219.ScanId;v=1;d1=31446.31446.3	controllerType=0 controllerNumber=1 scan=31446	64.1741
37291:3	1	S.MPLPPHPGHPGYINFS[+79.966]YEVLTPL.K		S[+80]	886.099	3	2656.28	2656.27	0	5.7	17	Non	299.97	299.97	48.69	4.71	1206	>sp|P02817|AMELX_BOVIN Amelogenin, X isoform OS=Bos taurus OX=9913 GN=AMELX PE=1 SV=2	1	hf1_10472_ebo_26_1_261219.ScanId;v=1;d1=27423.27423.3	controllerType=0 controllerNumber=1 scan=27423	56.9828
42849:3	1	S.MPLPPHPGHPGYINFS[+79.966]YEVLTPL.K		S[+80]	886.1	3	2656.29	2656.27	0	6.8	17	Non	316.89	316.89	79.75	4.76	1206	>sp|P02817|AMELX_BOVIN Amelogenin, X isoform OS=Bos taurus OX=9913 GN=AMELX PE=1 SV=2	1	hf1_10472_ebo_26_1_261219.ScanId;v=1;d1=31054.31054.3	controllerType=0 controllerNumber=1 scan=31054	63.4765
33164:2	1	S.MPLPPHPGHPGYINFS[+79.966]YEVLTPL.K		S[+80]	1328.65	2	2656.29	2656.27	0	8.3	17	Non	317.27	317.27	106.4	4.21	1206	>sp|P02817|AMELX_BOVIN Amelogenin, X isoform OS=Bos taurus OX=9913 GN=AMELX PE=1 SV=2	1	hf1_10472_ebo_26_1_261219.ScanId;v=1;d1=24655.24655.2	controllerType=0 controllerNumber=1 scan=24655	52.0283
33244:3	1	S.MPLPPHPGHPGYINFS[+79.966]YEVLTPL.K		S[+80]	886.099	3	2656.28	2656.27	0	5.9	17	Non	330.42	330.42	92.7	4.81	1206	>sp|P02817|AMELX_BOVIN Amelogenin, X isoform OS=Bos taurus OX=9913 GN=AMELX PE=1 SV=2	1	hf1_10472_ebo_26_1_261219.ScanId;v=1;d1=24709.24709.3	controllerType=0 controllerNumber=1 scan=24709	52.1256
35600:3	1	S.MPLPPHPGHPGYINFS[+79.966]YEVLTPL.K		S[+80]	886.101	3	2656.29	2656.27	0	8.6	17	Non	351.2	351.2	123.3	4.54	1206	>sp|P02817|AMELX_BOVIN Amelogenin, X isoform OS=Bos taurus OX=9913 GN=AMELX PE=1 SV=2	1	hf1_10472_ebo_26_1_261219.ScanId;v=1;d1=26319.26319.3	controllerType=0 controllerNumber=1 scan=26319	55.0134
35317:3	1	S.MPLPPHPGHPGYINFS[+79.966]YEVLTPL.K		S[+80]	886.1	3	2656.28	2656.27	0	6.6	17	Non	377.65	377.65	82.1	5.77	1206	>sp|P02817|AMELX_BOVIN Amelogenin, X isoform OS=Bos taurus OX=9913 GN=AMELX PE=1 SV=2	1	hf1_10472_ebo_26_1_261219.ScanId;v=1;d1=26125.26125.3	controllerType=0 controllerNumber=1 scan=26125	54.665
35022:3	1	S.MPLPPHPGHPGYINFS[+79.966]YEVLTPL.K		S[+80]	886.099	3	2656.28	2656.27	0	5.4	17	Non	385.94	385.94	94.41	5.73	1206	>sp|P02817|AMELX_BOVIN Amelogenin, X isoform OS=Bos taurus OX=9913 GN=AMELX PE=1 SV=2	1	hf1_10472_ebo_26_1_261219.ScanId;v=1;d1=25926.25926.3	controllerType=0 controllerNumber=1 scan=25926	54.3119
34171:3	1	S.MPLPPHPGHPGYINFS[+79.966]YEVLTPL.K		S[+80]	886.095	3	2656.27	2656.27	0	0.8	17	Non	413.37	413.37	135.26	4.89	1206	>sp|P02817|AMELX_BOVIN Amelogenin, X isoform OS=Bos taurus OX=9913 GN=AMELX PE=1 SV=2	1	hf1_10472_ebo_26_1_261219.ScanId;v=1;d1=25343.25343.3	controllerType=0 controllerNumber=1 scan=25343	53.2556
30039:3	1	S.MP[+15.995]LPPHPGHPGYINFSYEVLTPL.K		P[+16]	864.775	3	2592.31	2592.3	0	5.7	17	Non	414.73	381.15	4	6.05	1206	>sp|P02817|AMELX_BOVIN Amelogenin, X isoform OS=Bos taurus OX=9913 GN=AMELX PE=1 SV=2	1	hf1_10472_ebo_26_1_261219.ScanId;v=1;d1=22585.22585.3	controllerType=0 controllerNumber=1 scan=22585	48.3794
33606:3	1	S.MPLPPHPGHPGYINFS[+79.966]YEVLTPL.K		S[+80]	886.099	3	2656.28	2656.27	0	5.9	17	Non	418.89	418.89	125.97	6.05	1206	>sp|P02817|AMELX_BOVIN Amelogenin, X isoform OS=Bos taurus OX=9913 GN=AMELX PE=1 SV=2	1	hf1_10472_ebo_26_1_261219.ScanId;v=1;d1=24951.24951.3	controllerType=0 controllerNumber=1 scan=24951	52.5575
30314:3	1	S.MP[+15.995]LPPHPGHPGYINFSYEVLTPL.K		P[+16]	864.775	3	2592.31	2592.3	0	6.2	17	Non	457.11	442.73	5.8	6.23	1206	>sp|P02817|AMELX_BOVIN Amelogenin, X isoform OS=Bos taurus OX=9913 GN=AMELX PE=1 SV=2	1	hf1_10472_ebo_26_1_261219.ScanId;v=1;d1=22779.22779.3	controllerType=0 controllerNumber=1 scan=22779	48.7242
33320:3	1	S.MPLPPHPGHPGYINFS[+79.966]YEVLTPL.K		S[+80]	886.1	3	2656.28	2656.27	0	6.6	17	Non	462.23	462.23	136.6	6.16	1206	>sp|P02817|AMELX_BOVIN Amelogenin, X isoform OS=Bos taurus OX=9913 GN=AMELX PE=1 SV=2	1	hf1_10472_ebo_26_1_261219.ScanId;v=1;d1=24760.24760.3	controllerType=0 controllerNumber=1 scan=24760	52.2154
33889:3	1	S.MPLPPHPGHPGYINFS[+79.966]YEVLTPL.K		S[+80]	886.098	3	2656.28	2656.27	0	4.9	17	Non	462.23	462.23	133.21	6.23	1206	>sp|P02817|AMELX_BOVIN Amelogenin, X isoform OS=Bos taurus OX=9913 GN=AMELX PE=1 SV=2	1	hf1_10472_ebo_26_1_261219.ScanId;v=1;d1=25147.25147.3	controllerType=0 controllerNumber=1 scan=25147	52.9024
34033:2	1	S.MPLPPHPGHPGYINFS[+79.966]YEVLTPL.K		S[+80]	1328.65	2	2656.29	2656.27	0	7.1	17	Non	488.44	488.44	170.09	6.16	1206	>sp|P02817|AMELX_BOVIN Amelogenin, X isoform OS=Bos taurus OX=9913 GN=AMELX PE=1 SV=2	1	hf1_10472_ebo_26_1_261219.ScanId;v=1;d1=25245.25245.2	controllerType=0 controllerNumber=1 scan=25245	53.0756
33458:2	1	S.MPLPPHPGHPGYINFS[+79.966]YEVLTPL.K		S[+80]	1328.65	2	2656.29	2656.27	0	7.8	17	Non	497.76	497.76	188.85	6.16	1206	>sp|P02817|AMELX_BOVIN Amelogenin, X isoform OS=Bos taurus OX=9913 GN=AMELX PE=1 SV=2	1	hf1_10472_ebo_26_1_261219.ScanId;v=1;d1=24853.24853.2	controllerType=0 controllerNumber=1 scan=24853	52.3791
33752:2	1	S.MPLPPHPGHPGYINFS[+79.966]YEVLTPL.K		S[+80]	1328.65	2	2656.29	2656.27	0	7.7	17	Non	541.58	541.58	193.57	6.38	1206	>sp|P02817|AMELX_BOVIN Amelogenin, X isoform OS=Bos taurus OX=9913 GN=AMELX PE=1 SV=2	1	hf1_10472_ebo_26_1_261219.ScanId;v=1;d1=25050.25050.2	controllerType=0 controllerNumber=1 scan=25050	52.7307
44762:3	1	S.MP[+15.995]LPPHPGHPGYINFS[+79.966]YEVLTPL.K		P[+16], S[+80]	891.429	3	2672.27	2672.26	0	4.1	17	Non	26.1	26.1	3.69	2.16	1206	>sp|P02817|AMELX_BOVIN Amelogenin, X isoform OS=Bos taurus OX=9913 GN=AMELX PE=1 SV=2	1	hf1_10472_ebo_26_1_261219.ScanId;v=1;d1=32443.32443.3	controllerType=0 controllerNumber=1 scan=32443	66.3137
42868:3	1	S.MP[+15.995]LPPHPGHPGYINFS[+79.966]YEVLTPL.K		P[+16], S[+80]	891.432	3	2672.28	2672.26	0	7.4	17	Non	112.66	112.66	5.8	2.19	1206	>sp|P02817|AMELX_BOVIN Amelogenin, X isoform OS=Bos taurus OX=9913 GN=AMELX PE=1 SV=2	1	hf1_10472_ebo_26_1_261219.ScanId;v=1;d1=31065.31065.3	controllerType=0 controllerNumber=1 scan=31065	63.4962
44067:3	1	S.MP[+15.995]LPPHPGHPGYINFS[+79.966]YEVLTPL.K		P[+16], S[+80]	891.431	3	2672.28	2672.26	0	6.3	17	Non	121.16	121.16	4	2.49	1206	>sp|P02817|AMELX_BOVIN Amelogenin, X isoform OS=Bos taurus OX=9913 GN=AMELX PE=1 SV=2	1	hf1_10472_ebo_26_1_261219.ScanId;v=1;d1=31883.31883.3	controllerType=0 controllerNumber=1 scan=31883	64.9601
43498:3	1	S.MP[+15.995]LPPHPGHPGYINFS[+79.966]YEVLTPL.K		P[+16], S[+80]	891.433	3	2672.28	2672.26	0	8.3	17	Non	125.04	125.04	2.5	2.18	1206	>sp|P02817|AMELX_BOVIN Amelogenin, X isoform OS=Bos taurus OX=9913 GN=AMELX PE=1 SV=2	1	hf1_10472_ebo_26_1_261219.ScanId;v=1;d1=31490.31490.3	controllerType=0 controllerNumber=1 scan=31490	64.2529
40758:3	1	S.MPLPPHPGHPGYINFS[+79.966]Y[+15.995]EVLTPL.K		S[+80], Y[+16]	891.431	3	2672.28	2672.26	0	5.8	17	Non	132.48	132.48	7.95	2.23	1206	>sp|P02817|AMELX_BOVIN Amelogenin, X isoform OS=Bos taurus OX=9913 GN=AMELX PE=1 SV=2	1	hf1_10472_ebo_26_1_261219.ScanId;v=1;d1=29699.29699.4	controllerType=0 controllerNumber=1 scan=29699	61.0473
39932:3	1	S.MP[+15.995]LPPHPGHPGYINFS[+79.966]YEVLTPL.K		P[+16], S[+80]	891.433	3	2672.28	2672.26	0	7.9	17	Non	134.25	134.25	5.8	2.24	1206	>sp|P02817|AMELX_BOVIN Amelogenin, X isoform OS=Bos taurus OX=9913 GN=AMELX PE=1 SV=2	1	hf1_10472_ebo_26_1_261219.ScanId;v=1;d1=29155.29155.3	controllerType=0 controllerNumber=1 scan=29155	60.0774
44441:3	1	S.MP[+15.995]LPPHPGHPGYINFS[+79.966]YEVLTPL.K		P[+16], S[+80]	891.433	3	2672.28	2672.26	0	7.8	17	Non	159.53	159.53	4	2.55	1206	>sp|P02817|AMELX_BOVIN Amelogenin, X isoform OS=Bos taurus OX=9913 GN=AMELX PE=1 SV=2	1	hf1_10472_ebo_26_1_261219.ScanId;v=1;d1=32176.32176.3	controllerType=0 controllerNumber=1 scan=32176	65.6388
43790:3	1	S.MP[+15.995]LPPHPGHPGYINFS[+79.966]YEVLTPL.K		P[+16], S[+80]	891.432	3	2672.28	2672.26	0	7.8	17	Non	160.68	160.68	4	2.99	1206	>sp|P02817|AMELX_BOVIN Amelogenin, X isoform OS=Bos taurus OX=9913 GN=AMELX PE=1 SV=2	1	hf1_10472_ebo_26_1_261219.ScanId;v=1;d1=31688.31688.3	controllerType=0 controllerNumber=1 scan=31688	64.6067
41238:3	1	S.MP[+15.995]LPPHPGHPGYINFS[+79.966]YEVLTPL.K		P[+16], S[+80]	891.432	3	2672.28	2672.26	0	6.8	17	Non	162.78	162.78	0.02	2.64	1206	>sp|P02817|AMELX_BOVIN Amelogenin, X isoform OS=Bos taurus OX=9913 GN=AMELX PE=1 SV=2	1	hf1_10472_ebo_26_1_261219.ScanId;v=1;d1=30018.30018.3	controllerType=0 controllerNumber=1 scan=30018	61.6212
41984:3	1	S.MP[+15.995]LPPHPGHPGYINFS[+79.966]YEVLTPL.K		P[+16], S[+80]	891.431	3	2672.28	2672.26	0	6.4	17	Non	165.22	165.22	4	3.17	1206	>sp|P02817|AMELX_BOVIN Amelogenin, X isoform OS=Bos taurus OX=9913 GN=AMELX PE=1 SV=2	1	hf1_10472_ebo_26_1_261219.ScanId;v=1;d1=30500.30500.3	controllerType=0 controllerNumber=1 scan=30500	62.4853
35673:3	1	S.MP[+15.995]LPPHPGHPGYINFS[+79.966]YEVLTPL.K		P[+16], S[+80]	891.429	3	2672.27	2672.26	0	4.3	17	Non	165.85	165.85	5.8	2.61	1206	>sp|P02817|AMELX_BOVIN Amelogenin, X isoform OS=Bos taurus OX=9913 GN=AMELX PE=1 SV=2	1	hf1_10472_ebo_26_1_261219.ScanId;v=1;d1=26366.26366.3	controllerType=0 controllerNumber=1 scan=26366	55.0946
43226:3	1	S.MP[+15.995]LPPHPGHPGYINFS[+79.966]YEVLTPL.K		P[+16], S[+80]	891.43	3	2672.28	2672.26	0	5.2	17	Non	173.17	173.17	8.78	2.61	1206	>sp|P02817|AMELX_BOVIN Amelogenin, X isoform OS=Bos taurus OX=9913 GN=AMELX PE=1 SV=2	1	hf1_10472_ebo_26_1_261219.ScanId;v=1;d1=31299.31299.3	controllerType=0 controllerNumber=1 scan=31299	63.9134
34811:3	1	S.MP[+15.995]LPPHPGHPGYINFS[+79.966]YEVLTPL.K		P[+16], S[+80]	891.432	3	2672.28	2672.26	0	7.2	17	Non	175.33	175.33	5.8	2.64	1206	>sp|P02817|AMELX_BOVIN Amelogenin, X isoform OS=Bos taurus OX=9913 GN=AMELX PE=1 SV=2	1	hf1_10472_ebo_26_1_261219.ScanId;v=1;d1=25786.25786.3	controllerType=0 controllerNumber=1 scan=25786	54.0528
37470:3	1	S.MP[+15.995]LPPHPGHPGYINFS[+79.966]YEVLTPL.K		P[+16], S[+80]	891.431	3	2672.28	2672.26	0	6.5	17	Non	188.02	188.02	5.8	2.64	1206	>sp|P02817|AMELX_BOVIN Amelogenin, X isoform OS=Bos taurus OX=9913 GN=AMELX PE=1 SV=2	1	hf1_10472_ebo_26_1_261219.ScanId;v=1;d1=27539.27539.3	controllerType=0 controllerNumber=1 scan=27539	57.1896
31299:3	1	S.MP[+15.995]LPPHPGHPGYINFS[+79.966]YEVLTPL.K		P[+16], S[+80]	891.432	3	2672.28	2672.26	0	7.6	17	Non	191.69	191.69	5.8	2.64	1206	>sp|P02817|AMELX_BOVIN Amelogenin, X isoform OS=Bos taurus OX=9913 GN=AMELX PE=1 SV=2	1	hf1_10472_ebo_26_1_261219.ScanId;v=1;d1=23437.23437.3	controllerType=0 controllerNumber=1 scan=23437	49.8814
37768:3	1	S.MP[+15.995]LPPHPGHPGYINFS[+79.966]YEVLTPL.K		P[+16], S[+80]	891.43	3	2672.28	2672.26	0	5.2	17	Non	194.95	194.95	5.8	2.61	1206	>sp|P02817|AMELX_BOVIN Amelogenin, X isoform OS=Bos taurus OX=9913 GN=AMELX PE=1 SV=2	1	hf1_10472_ebo_26_1_261219.ScanId;v=1;d1=27739.27739.3	controllerType=0 controllerNumber=1 scan=27739	57.5489
42287:3	1	S.MP[+15.995]LPPHPGHPGYINFS[+79.966]YEVLTPL.K		P[+16], S[+80]	891.431	3	2672.28	2672.26	0	6.2	17	Non	200.46	200.46	5.8	3.21	1206	>sp|P02817|AMELX_BOVIN Amelogenin, X isoform OS=Bos taurus OX=9913 GN=AMELX PE=1 SV=2	1	hf1_10472_ebo_26_1_261219.ScanId;v=1;d1=30698.30698.3	controllerType=0 controllerNumber=1 scan=30698	62.8401
38974:3	1	S.M[+15.995]PLPPHPGHPGYINFS[+79.966]YEVLTPL.K		M[+16], S[+80]	891.433	3	2672.28	2672.26	0	8	17	Non	201.66	201.66	0.05	3.25	1206	>sp|P02817|AMELX_BOVIN Amelogenin, X isoform OS=Bos taurus OX=9913 GN=AMELX PE=1 SV=2	1	hf1_10472_ebo_26_1_261219.ScanId;v=1;d1=28529.28529.3	controllerType=0 controllerNumber=1 scan=28529	58.9607
42597:3	1	S.MP[+15.995]LPPHPGHPGYINFS[+79.966]YEVLTPL.K		P[+16], S[+80]	891.431	3	2672.28	2672.26	0	5.9	17	Non	209.43	209.43	5.8	3.39	1206	>sp|P02817|AMELX_BOVIN Amelogenin, X isoform OS=Bos taurus OX=9913 GN=AMELX PE=1 SV=2	1	hf1_10472_ebo_26_1_261219.ScanId;v=1;d1=30896.30896.3	controllerType=0 controllerNumber=1 scan=30896	63.1942
34261:3	1	S.MP[+15.995]LPPHPGHPGYINFS[+79.966]YEVLTPL.K		P[+16], S[+80]	891.43	3	2672.28	2672.26	0	5.3	17	Non	210.11	210.11	5.8	2.82	1206	>sp|P02817|AMELX_BOVIN Amelogenin, X isoform OS=Bos taurus OX=9913 GN=AMELX PE=1 SV=2	1	hf1_10472_ebo_26_1_261219.ScanId;v=1;d1=25401.25401.3	controllerType=0 controllerNumber=1 scan=25401	53.3581
35390:3	1	S.MP[+15.995]LPPHPGHPGYINFS[+79.966]YEVLTPL.K		P[+16], S[+80]	891.431	3	2672.28	2672.26	0	6.5	17	Non	210.45	210.45	5.8	2.86	1206	>sp|P02817|AMELX_BOVIN Amelogenin, X isoform OS=Bos taurus OX=9913 GN=AMELX PE=1 SV=2	1	hf1_10472_ebo_26_1_261219.ScanId;v=1;d1=26174.26174.3	controllerType=0 controllerNumber=1 scan=26174	54.7528
36298:3	1	S.MP[+15.995]LPPHPGHPGYINFS[+79.966]YEVLTPL.K		P[+16], S[+80]	891.431	3	2672.28	2672.26	0	6.4	17	Non	214.39	214.39	5.8	2.86	1206	>sp|P02817|AMELX_BOVIN Amelogenin, X isoform OS=Bos taurus OX=9913 GN=AMELX PE=1 SV=2	1	hf1_10472_ebo_26_1_261219.ScanId;v=1;d1=26779.26779.3	controllerType=0 controllerNumber=1 scan=26779	55.8333
35102:3	1	S.MP[+15.995]LPPHPGHPGYINFS[+79.966]YEVLTPL.K		P[+16], S[+80]	891.431	3	2672.28	2672.26	0	6.3	17	Non	235.39	235.39	5.8	3.25	1206	>sp|P02817|AMELX_BOVIN Amelogenin, X isoform OS=Bos taurus OX=9913 GN=AMELX PE=1 SV=2	1	hf1_10472_ebo_26_1_261219.ScanId;v=1;d1=25982.25982.3	controllerType=0 controllerNumber=1 scan=25982	54.4126
31537:4	1	S.MP[+15.995]LPPHPGHPGYINFS[+79.966]YEVLTPL.K		P[+16], S[+80]	668.825	4	2672.28	2672.26	0	6.1	17	Non	237.92	237.92	5.8	2.48	1206	>sp|P02817|AMELX_BOVIN Amelogenin, X isoform OS=Bos taurus OX=9913 GN=AMELX PE=1 SV=2	1	hf1_10472_ebo_26_1_261219.ScanId;v=1;d1=23589.23589.4	controllerType=0 controllerNumber=1 scan=23589	50.1482
31841:4	1	S.MP[+15.995]LPPHPGHPGYINFS[+79.966]YEVLTPL.K		P[+16], S[+80]	668.824	4	2672.28	2672.26	0	5.4	17	Non	251.76	251.76	5.8	2.91	1206	>sp|P02817|AMELX_BOVIN Amelogenin, X isoform OS=Bos taurus OX=9913 GN=AMELX PE=1 SV=2	1	hf1_10472_ebo_26_1_261219.ScanId;v=1;d1=23792.23792.4	controllerType=0 controllerNumber=1 scan=23792	50.5068
33630:3	1	S.MP[+15.995]LPPHPGHPGYINFS[+79.966]YEVLTPL.K		P[+16], S[+80]	891.43	3	2672.28	2672.26	0	5	17	Non	257.32	257.32	5.8	3.77	1206	>sp|P02817|AMELX_BOVIN Amelogenin, X isoform OS=Bos taurus OX=9913 GN=AMELX PE=1 SV=2	1	hf1_10472_ebo_26_1_261219.ScanId;v=1;d1=24966.24966.3	controllerType=0 controllerNumber=1 scan=24966	52.5818
33975:3	1	S.MPLPPHPGH[+15.995]PGYINFS[+79.966]YEVLTPL.K		H[+16], S[+80]	891.429	3	2672.27	2672.26	0	3.6	17	Non	259.57	259.57	13	3.79	1206	>sp|P02817|AMELX_BOVIN Amelogenin, X isoform OS=Bos taurus OX=9913 GN=AMELX PE=1 SV=2	1	hf1_10472_ebo_26_1_261219.ScanId;v=1;d1=25206.25206.3	controllerType=0 controllerNumber=1 scan=25206	53.0065
33312:3	1	S.MPLPPHPGH[+15.995]PGYINFS[+79.966]YEVLTPL.K		H[+16], S[+80]	891.43	3	2672.28	2672.26	0	5.5	17	Non	303.35	303.35	3.35	4.51	1206	>sp|P02817|AMELX_BOVIN Amelogenin, X isoform OS=Bos taurus OX=9913 GN=AMELX PE=1 SV=2	1	hf1_10472_ebo_26_1_261219.ScanId;v=1;d1=24754.24754.3	controllerType=0 controllerNumber=1 scan=24754	52.2036
32199:3	1	S.MP[+15.995]LPPHPGHPGYINFS[+79.966]YEVLTPL.K		P[+16], S[+80]	891.43	3	2672.28	2672.26	0	5.2	17	Non	304.6	304.6	4	4.71	1206	>sp|P02817|AMELX_BOVIN Amelogenin, X isoform OS=Bos taurus OX=9913 GN=AMELX PE=1 SV=2	1	hf1_10472_ebo_26_1_261219.ScanId;v=1;d1=24026.24026.3	controllerType=0 controllerNumber=1 scan=24026	50.9165
31603:3	1	S.MP[+15.995]LPPHPGHPGYINFS[+79.966]YEVLTPL.K		P[+16], S[+80]	891.431	3	2672.28	2672.26	0	5.8	17	Non	304.91	304.91	4	4.71	1206	>sp|P02817|AMELX_BOVIN Amelogenin, X isoform OS=Bos taurus OX=9913 GN=AMELX PE=1 SV=2	1	hf1_10472_ebo_26_1_261219.ScanId;v=1;d1=23630.23630.3	controllerType=0 controllerNumber=1 scan=23630	50.2204
32811:3	1	S.MP[+15.995]LPPHPGHPGYINFS[+79.966]YEVLTPL.K		P[+16], S[+80]	891.427	3	2672.27	2672.26	0	2	17	Non	333.87	333.87	5.8	3.86	1206	>sp|P02817|AMELX_BOVIN Amelogenin, X isoform OS=Bos taurus OX=9913 GN=AMELX PE=1 SV=2	1	hf1_10472_ebo_26_1_261219.ScanId;v=1;d1=24418.24418.3	controllerType=0 controllerNumber=1 scan=24418	51.6083
31888:3	1	S.MP[+15.995]LPPHPGHPGYINFS[+79.966]YEVLTPL.K		P[+16], S[+80]	891.43	3	2672.28	2672.26	0	5.2	17	Non	350.56	350.56	4	4.91	1206	>sp|P02817|AMELX_BOVIN Amelogenin, X isoform OS=Bos taurus OX=9913 GN=AMELX PE=1 SV=2	1	hf1_10472_ebo_26_1_261219.ScanId;v=1;d1=23823.23823.3	controllerType=0 controllerNumber=1 scan=23823	50.5617
31507:2	1	S.MP[+15.995]LPPHPGHPGYINFS[+79.966]YEVLTPL.K		P[+16], S[+80]	1336.65	2	2672.28	2672.26	0	8.2	17	Non	379.87	379.87	4	5.53	1206	>sp|P02817|AMELX_BOVIN Amelogenin, X isoform OS=Bos taurus OX=9913 GN=AMELX PE=1 SV=2	1	hf1_10472_ebo_26_1_261219.ScanId;v=1;d1=23569.23569.2	controllerType=0 controllerNumber=1 scan=23569	50.1129
34172:3	1	S.MPLPPHPGHPGYIN[+0.984]FS[+79.966]YEVLTPL.K		N[+1], S[+80]	886.428	3	2657.27	2657.25	0	7	17	Non	383.21	383.21	127.06	5.77	1206	>sp|P02817|AMELX_BOVIN Amelogenin, X isoform OS=Bos taurus OX=9913 GN=AMELX PE=1 SV=2	1	hf1_10472_ebo_26_1_261219.ScanId;v=1;d1=25343.25343.3	controllerType=0 controllerNumber=1 scan=25343	53.2556
34315:2	1	S.MPLPPHPGHPGYIN[+0.984]FS[+79.966]YEVLTPL.K		N[+1], S[+80]	1329.14	2	2657.27	2657.25	0	7.5	17	Non	407.7	407.7	158.97	5.86	1206	>sp|P02817|AMELX_BOVIN Amelogenin, X isoform OS=Bos taurus OX=9913 GN=AMELX PE=1 SV=2	1	hf1_10472_ebo_26_1_261219.ScanId;v=1;d1=25438.25438.2	controllerType=0 controllerNumber=1 scan=25438	53.4245
34452:3	1	S.MPLPPHPGHPGYIN[+0.984]FS[+79.966]YEVLTPL.K		N[+1], S[+80]	886.428	3	2657.27	2657.25	0	6.7	17	Non	419.17	419.17	104.46	5.89	1206	>sp|P02817|AMELX_BOVIN Amelogenin, X isoform OS=Bos taurus OX=9913 GN=AMELX PE=1 SV=2	1	hf1_10472_ebo_26_1_261219.ScanId;v=1;d1=25536.25536.3	controllerType=0 controllerNumber=1 scan=25536	53.6054
30984:3	1	S.MP[+15.995]LPPHPGHPGYIN[+0.984]FSYEVLTPL.K		N[+1], P[+16]	865.105	3	2593.3	2593.28	0	8.3	17	Non	432.98	432.98	5.8	5.78	1206	>sp|P02817|AMELX_BOVIN Amelogenin, X isoform OS=Bos taurus OX=9913 GN=AMELX PE=1 SV=2	1	hf1_10472_ebo_26_1_261219.ScanId;v=1;d1=23227.23227.3	controllerType=0 controllerNumber=1 scan=23227	49.5131
32111:2	1	S.MP[+15.995]LPPHPGHPGYINFS[+79.966]YEVLTPL.K		P[+16], S[+80]	1336.64	2	2672.28	2672.26	0	6	17	Non	445.71	445.71	4	5.87	1206	>sp|P02817|AMELX_BOVIN Amelogenin, X isoform OS=Bos taurus OX=9913 GN=AMELX PE=1 SV=2	1	hf1_10472_ebo_26_1_261219.ScanId;v=1;d1=23966.23966.2	controllerType=0 controllerNumber=1 scan=23966	50.8108
31809:2	1	S.M[+15.995]PLPPHPGHPGYINFS[+79.966]YEVLTPL.K		M[+16], S[+80]	1336.64	2	2672.28	2672.26	0	6.5	17	Non	447.97	447.97	7.2	5.92	1206	>sp|P02817|AMELX_BOVIN Amelogenin, X isoform OS=Bos taurus OX=9913 GN=AMELX PE=1 SV=2	1	hf1_10472_ebo_26_1_261219.ScanId;v=1;d1=23769.23769.2	controllerType=0 controllerNumber=1 scan=23769	50.4675
44817:3	1	S.MPLPPHPGHP[+31.990]GY[+31.990]INF[+15.995]SYEVLTPL.K		F[+16], P[+32], Y[+32]	886.097	3	2656.28	2656.28	0	0.3	17	Non	16.82	16.82	0.24	1.7	1206	>sp|P02817|AMELX_BOVIN Amelogenin, X isoform OS=Bos taurus OX=9913 GN=AMELX PE=1 SV=2	1	hf1_10472_ebo_26_1_261219.ScanId;v=1;d1=32513.32513.3	controllerType=0 controllerNumber=1 scan=32513	66.5892
44895:3	1	S.MPLPPHPGH[+15.995]P[+31.990]GY[+31.990]INFSYEVLTPL.K		H[+16], P[+32], Y[+32]	886.097	3	2656.28	2656.28	0	0	17	Non	41.21	41.21	0	1.74	1206	>sp|P02817|AMELX_BOVIN Amelogenin, X isoform OS=Bos taurus OX=9913 GN=AMELX PE=1 SV=2	1	hf1_10472_ebo_26_1_261219.ScanId;v=1;d1=32605.32605.3	controllerType=0 controllerNumber=1 scan=32605	66.9277
43540:3	1	S.MPLPPHPGHP[+31.990]GY[+31.990]INF[+15.995]SYEVLTPL.K		F[+16], P[+32], Y[+32]	886.101	3	2656.29	2656.28	0	5.1	17	Non	68.85	68.85	0.24	2.22	1206	>sp|P02817|AMELX_BOVIN Amelogenin, X isoform OS=Bos taurus OX=9913 GN=AMELX PE=1 SV=2	1	hf1_10472_ebo_26_1_261219.ScanId;v=1;d1=31516.31516.3	controllerType=0 controllerNumber=1 scan=31516	64.2986
46222:3	1	S.MPLPPHPGHPGY[+15.995]INF[+31.990]SY[+31.990]EVLTPL.K		F[+32], Y[+16][+32]	886.105	3	2656.3	2656.28	0	9	17	Non	165.91	165.91	3.18	2.16	1206	>sp|P02817|AMELX_BOVIN Amelogenin, X isoform OS=Bos taurus OX=9913 GN=AMELX PE=1 SV=2	1	hf1_10472_ebo_26_1_261219.ScanId;v=1;d1=34372.34372.3	controllerType=0 controllerNumber=1 scan=34372	73.5929
41607:3	1	S.MPLPPHPGHP[+31.990]GY[+31.990]INF[+15.995]SYEVLTPL.K		F[+16], P[+32], Y[+32]	886.1	3	2656.29	2656.28	0	4	17	Non	171.44	171.44	2	2.62	1206	>sp|P02817|AMELX_BOVIN Amelogenin, X isoform OS=Bos taurus OX=9913 GN=AMELX PE=1 SV=2	1	hf1_10472_ebo_26_1_261219.ScanId;v=1;d1=30259.30259.3	controllerType=0 controllerNumber=1 scan=30259	62.0537
33321:3	1	S.MPLPPHPGHPGYINF[+31.990]S[+79.966]Y[+15.995]EVLTPL.K		F[+32], S[+80], Y[+16]	902.09	3	2704.26	2704.25	0	1.5	17	Non	194.73	194.73	0	2.21	1206	>sp|P02817|AMELX_BOVIN Amelogenin, X isoform OS=Bos taurus OX=9913 GN=AMELX PE=1 SV=2	1	hf1_10472_ebo_26_1_261219.ScanId;v=1;d1=24761.24761.5	controllerType=0 controllerNumber=1 scan=24761	52.2168
33033:2	1	S.MPLPPHP[+15.995]GHPGYIN[+0.984]FS[+79.966]YEVLTPL.K		N[+1], P[+16], S[+80]	1337.14	2	2673.27	2673.25	0	9.6	17	Non	235.17	195.43	5.37	2.71	1206	>sp|P02817|AMELX_BOVIN Amelogenin, X isoform OS=Bos taurus OX=9913 GN=AMELX PE=1 SV=2	1	hf1_10472_ebo_26_1_261219.ScanId;v=1;d1=24568.24568.2	controllerType=0 controllerNumber=1 scan=24568	51.8704
32518:3	1	S.MP[+15.995]LPPHPGHPGYIN[+0.984]FS[+79.966]YEVLTPL.K		N[+1], P[+16], S[+80]	891.761	3	2673.27	2673.25	0	8.7	17	Non	286.64	286.64	4	4.45	1206	>sp|P02817|AMELX_BOVIN Amelogenin, X isoform OS=Bos taurus OX=9913 GN=AMELX PE=1 SV=2	1	hf1_10472_ebo_26_1_261219.ScanId;v=1;d1=24224.24224.3	controllerType=0 controllerNumber=1 scan=24224	51.2641
32812:3	1	S.MP[+15.995]LPPHPGHPGYIN[+0.984]FS[+79.966]YEVLTPL.K		N[+1], P[+16], S[+80]	891.76	3	2673.27	2673.25	0	7.7	17	Non	295.84	295.84	5.8	4.56	1206	>sp|P02817|AMELX_BOVIN Amelogenin, X isoform OS=Bos taurus OX=9913 GN=AMELX PE=1 SV=2	1	hf1_10472_ebo_26_1_261219.ScanId;v=1;d1=24418.24418.3	controllerType=0 controllerNumber=1 scan=24418	51.6083
31062:3	1	S.MP[+15.995]LPPHPGHP[+15.995]GYINFS[+79.966]YEVLTPL.K		P[+16]*2, S[+80]	896.763	3	2688.27	2688.26	0	6.1	17	Non	319.22	319.22	5.8	4.51	1206	>sp|P02817|AMELX_BOVIN Amelogenin, X isoform OS=Bos taurus OX=9913 GN=AMELX PE=1 SV=2	1	hf1_10472_ebo_26_1_261219.ScanId;v=1;d1=23282.23282.3	controllerType=0 controllerNumber=1 scan=23282	49.6088
32408:2	1	S.M[+15.995]PLPPHPGHPGYIN[+0.984]FS[+79.966]YEVLTPL.K		M[+16], N[+1], S[+80]	1337.14	2	2673.27	2673.25	0	8.4	17	Non	320.95	268.45	3.51	4.06	1206	>sp|P02817|AMELX_BOVIN Amelogenin, X isoform OS=Bos taurus OX=9913 GN=AMELX PE=1 SV=2	1	hf1_10472_ebo_26_1_261219.ScanId;v=1;d1=24159.24159.2	controllerType=0 controllerNumber=1 scan=24159	51.1498
44917:3	1	S.MP[+15.995]LPPHPGHP[+31.990]GY[+31.990]INF[+15.995]SYEVLTPL.K		F[+16], P[+16][+32], Y[+32]	891.428	3	2672.27	2672.27	0	0	17	Non	1.17	1.17	0	2.06	1206	>sp|P02817|AMELX_BOVIN Amelogenin, X isoform OS=Bos taurus OX=9913 GN=AMELX PE=1 SV=2	1	hf1_10472_ebo_26_1_261219.ScanId;v=1;d1=32630.32630.3	controllerType=0 controllerNumber=1 scan=32630	67.0004
44288:3	1	S.MP[+15.995]LPPHPGHP[+31.990]GY[+31.990]INFSY[+15.995]EVLTPL.K		P[+16][+32], Y[+16][+32]	891.433	3	2672.28	2672.27	0	4.8	17	Non	56.86	56.86	0	2.26	1206	>sp|P02817|AMELX_BOVIN Amelogenin, X isoform OS=Bos taurus OX=9913 GN=AMELX PE=1 SV=2	1	hf1_10472_ebo_26_1_261219.ScanId;v=1;d1=32050.32050.3	controllerType=0 controllerNumber=1 scan=32050	65.2994
41640:3	1	S.MP[+15.995]LPPHPGHP[+31.990]GY[+31.990]INFSY[+15.995]EVLTPL.K		P[+16][+32], Y[+16][+32]	891.431	3	2672.28	2672.27	0	3	17	Non	100.78	100.78	0	2.18	1206	>sp|P02817|AMELX_BOVIN Amelogenin, X isoform OS=Bos taurus OX=9913 GN=AMELX PE=1 SV=2	1	hf1_10472_ebo_26_1_261219.ScanId;v=1;d1=30280.30280.4	controllerType=0 controllerNumber=1 scan=30280	62.0915
41680:3	1	S.MP[+15.995]LPPHPGHP[+15.995]GYINF[+31.990]SY[+31.990]EVLTPL.K		F[+32], P[+16]*2, Y[+32]	891.43	3	2672.28	2672.27	0	2.4	17	Non	123	123	0	2.17	1206	>sp|P02817|AMELX_BOVIN Amelogenin, X isoform OS=Bos taurus OX=9913 GN=AMELX PE=1 SV=2	1	hf1_10472_ebo_26_1_261219.ScanId;v=1;d1=30306.30306.3	controllerType=0 controllerNumber=1 scan=30306	62.137
44013:3	1	S.MPLPPHPGHP[+31.990]GY[+31.990]IN[+0.984]F[+15.995]SYEVLTPL.K		F[+16], N[+1], P[+32], Y[+32]	886.433	3	2657.28	2657.26	0	9.3	17	Non	125.06	125.06	0.24	2.27	1206	>sp|P02817|AMELX_BOVIN Amelogenin, X isoform OS=Bos taurus OX=9913 GN=AMELX PE=1 SV=2	1	hf1_10472_ebo_26_1_261219.ScanId;v=1;d1=31842.31842.3	controllerType=0 controllerNumber=1 scan=31842	64.8836
34607:2	1	S.MPLPPHPGHP[+31.990]GY[+15.995]IN[+0.984]F[+31.990]SYEVLTPL.K		F[+32], N[+1], P[+32], Y[+16]	1329.14	2	2657.28	2657.26	0	8	17	Non	189.99	189.99	5.3	2.62	1206	>sp|P02817|AMELX_BOVIN Amelogenin, X isoform OS=Bos taurus OX=9913 GN=AMELX PE=1 SV=2	1	hf1_10472_ebo_26_1_261219.ScanId;v=1;d1=25646.25646.2	controllerType=0 controllerNumber=1 scan=25646	53.7977
38672:3	1	S.MP[+15.995]LPPHPGHP[+31.990]GY[+15.995]INF[+31.990]SYEVLTPL.K		F[+32], P[+16][+32], Y[+16]	891.432	3	2672.28	2672.27	0	4.7	17	Non	196.62	196.62	2	2.95	1206	>sp|P02817|AMELX_BOVIN Amelogenin, X isoform OS=Bos taurus OX=9913 GN=AMELX PE=1 SV=2	1	hf1_10472_ebo_26_1_261219.ScanId;v=1;d1=28330.28330.3	controllerType=0 controllerNumber=1 scan=28330	58.6045
45069:4	1	S.MPLPPHPGHPGYINFS[+79.966]YEVLTPLK.W		S[+80]	696.848	4	2784.37	2784.36	0	3.5	17	NRagged	16.21	16.21	3.33	2.23	1206	>sp|P02817|AMELX_BOVIN Amelogenin, X isoform OS=Bos taurus OX=9913 GN=AMELX PE=1 SV=2	1	hf1_10472_ebo_26_1_261219.ScanId;v=1;d1=32792.32792.4	controllerType=0 controllerNumber=1 scan=32792	67.4936
41397:4	1	S.MPLPPHPGHPGYINFS[+79.966]YEVLTPLK.W		S[+80]	696.851	4	2784.38	2784.36	0	6.7	17	NRagged	41.04	41.04	3.75	2.8	1206	>sp|P02817|AMELX_BOVIN Amelogenin, X isoform OS=Bos taurus OX=9913 GN=AMELX PE=1 SV=2	1	hf1_10472_ebo_26_1_261219.ScanId;v=1;d1=30118.30118.4	controllerType=0 controllerNumber=1 scan=30118	61.8004
45137:4	1	S.MPLPPHPGHPGYINFS[+79.966]YEVLTPLK.W		S[+80]	696.849	4	2784.37	2784.36	0	3.8	17	NRagged	69.48	69.48	7.54	2.38	1206	>sp|P02817|AMELX_BOVIN Amelogenin, X isoform OS=Bos taurus OX=9913 GN=AMELX PE=1 SV=2	1	hf1_10472_ebo_26_1_261219.ScanId;v=1;d1=32881.32881.4	controllerType=0 controllerNumber=1 scan=32881	67.8365
45870:3	1	S.MPLPPHPGHPGYINFS[+79.966]YEVLTPLK.W		S[+80]	928.798	3	2784.38	2784.36	0	6.7	17	NRagged	83.63	83.63	83.63	3.99	1206	>sp|P02817|AMELX_BOVIN Amelogenin, X isoform OS=Bos taurus OX=9913 GN=AMELX PE=1 SV=2	1	hf1_10472_ebo_26_1_261219.ScanId;v=1;d1=33921.33921.3	controllerType=0 controllerNumber=1 scan=33921	71.9159
44859:3	1	S.MPLPPHPGHPGYINFS[+79.966]YEVLTPLK.W		S[+80]	928.797	3	2784.38	2784.36	0	4.8	17	NRagged	93.97	93.97	70.43	3.16	1206	>sp|P02817|AMELX_BOVIN Amelogenin, X isoform OS=Bos taurus OX=9913 GN=AMELX PE=1 SV=2	1	hf1_10472_ebo_26_1_261219.ScanId;v=1;d1=32555.32555.3	controllerType=0 controllerNumber=1 scan=32555	66.7305
44050:4	1	S.MPLPPHPGHPGYINFS[+79.966]YEVLTPLK.W		S[+80]	696.85	4	2784.38	2784.36	0	6.2	17	NRagged	97.13	97.13	12.27	2.96	1206	>sp|P02817|AMELX_BOVIN Amelogenin, X isoform OS=Bos taurus OX=9913 GN=AMELX PE=1 SV=2	1	hf1_10472_ebo_26_1_261219.ScanId;v=1;d1=31869.31869.4	controllerType=0 controllerNumber=1 scan=31869	64.9332
43484:4	1	S.MPLPPHPGHPGYINFS[+79.966]YEVLTPLK.W		S[+80]	696.852	4	2784.39	2784.36	0	8.5	17	NRagged	110.88	110.88	21.66	2.71	1206	>sp|P02817|AMELX_BOVIN Amelogenin, X isoform OS=Bos taurus OX=9913 GN=AMELX PE=1 SV=2	1	hf1_10472_ebo_26_1_261219.ScanId;v=1;d1=31481.31481.4	controllerType=0 controllerNumber=1 scan=31481	64.2361
44943:4	1	S.MPLPPHPGHPGYINFS[+79.966]YEVLTPLK.W		S[+80]	696.849	4	2784.37	2784.36	0	4.2	17	NRagged	113.55	113.55	18.74	2.92	1206	>sp|P02817|AMELX_BOVIN Amelogenin, X isoform OS=Bos taurus OX=9913 GN=AMELX PE=1 SV=2	1	hf1_10472_ebo_26_1_261219.ScanId;v=1;d1=32654.32654.4	controllerType=0 controllerNumber=1 scan=32654	67.0578
41929:4	1	S.MPLPPHPGHPGYINFS[+79.966]YEVLTPLK.W		S[+80]	696.85	4	2784.38	2784.36	0	6.2	17	NRagged	114.02	114.02	14.39	2.96	1206	>sp|P02817|AMELX_BOVIN Amelogenin, X isoform OS=Bos taurus OX=9913 GN=AMELX PE=1 SV=2	1	hf1_10472_ebo_26_1_261219.ScanId;v=1;d1=30464.30464.4	controllerType=0 controllerNumber=1 scan=30464	62.4187
42242:4	1	S.MPLPPHPGHPGYINFS[+79.966]YEVLTPLK.W		S[+80]	696.85	4	2784.38	2784.36	0	5.5	17	NRagged	152.98	152.98	31.4	3.27	1206	>sp|P02817|AMELX_BOVIN Amelogenin, X isoform OS=Bos taurus OX=9913 GN=AMELX PE=1 SV=2	1	hf1_10472_ebo_26_1_261219.ScanId;v=1;d1=30668.30668.4	controllerType=0 controllerNumber=1 scan=30668	62.7856
42860:4	1	S.MPLPPHPGHPGYINFS[+79.966]YEVLTPLK.W		S[+80]	696.851	4	2784.38	2784.36	0	7.6	17	NRagged	166.27	166.27	7.35	4.07	1206	>sp|P02817|AMELX_BOVIN Amelogenin, X isoform OS=Bos taurus OX=9913 GN=AMELX PE=1 SV=2	1	hf1_10472_ebo_26_1_261219.ScanId;v=1;d1=31061.31061.4	controllerType=0 controllerNumber=1 scan=31061	63.4901
35698:4	1	S.MPLPPHPGHPGYINFS[+79.966]YEVLTPLK.W		S[+80]	696.85	4	2784.38	2784.36	0	5.9	17	NRagged	175.17	175.17	3.52	3.83	1206	>sp|P02817|AMELX_BOVIN Amelogenin, X isoform OS=Bos taurus OX=9913 GN=AMELX PE=1 SV=2	1	hf1_10472_ebo_26_1_261219.ScanId;v=1;d1=26381.26381.4	controllerType=0 controllerNumber=1 scan=26381	55.1201
44681:4	1	S.MPLPPHPGHPGYINFS[+79.966]YEVLTPLK.W		S[+80]	696.849	4	2784.37	2784.36	0	4.1	17	NRagged	178.29	178.29	47.17	3.71	1206	>sp|P02817|AMELX_BOVIN Amelogenin, X isoform OS=Bos taurus OX=9913 GN=AMELX PE=1 SV=2	1	hf1_10472_ebo_26_1_261219.ScanId;v=1;d1=32356.32356.4	controllerType=0 controllerNumber=1 scan=32356	66.0468
44948:3	1	S.MPLPPHPGHPGYINFS[+79.966]YEVLTPLK.W		S[+80]	928.795	3	2784.37	2784.36	0	3.3	17	NRagged	182.76	182.76	59.45	3.88	1206	>sp|P02817|AMELX_BOVIN Amelogenin, X isoform OS=Bos taurus OX=9913 GN=AMELX PE=1 SV=2	1	hf1_10472_ebo_26_1_261219.ScanId;v=1;d1=32658.32658.3	controllerType=0 controllerNumber=1 scan=32658	67.0681
22582:5	1	S.MP[+15.995]LPPHPGHPGYINFSYEVLTPLK.W		P[+16]	544.886	5	2720.4	2720.39	0	3.3	17	NRagged	200.9	200.9	5.8	2.85	1206	>sp|P02817|AMELX_BOVIN Amelogenin, X isoform OS=Bos taurus OX=9913 GN=AMELX PE=1 SV=2	1	hf1_10472_ebo_26_1_261219.ScanId;v=1;d1=17528.17528.2	controllerType=0 controllerNumber=1 scan=17528	39.5899
35140:4	1	S.MPLPPHPGHPGYINFS[+79.966]YEVLTPLK.W		S[+80]	696.851	4	2784.38	2784.36	0	7.3	17	NRagged	205.91	205.91	31.58	4.36	1206	>sp|P02817|AMELX_BOVIN Amelogenin, X isoform OS=Bos taurus OX=9913 GN=AMELX PE=1 SV=2	1	hf1_10472_ebo_26_1_261219.ScanId;v=1;d1=26005.26005.4	controllerType=0 controllerNumber=1 scan=26005	54.4529
35843:3	1	S.MPLPPHPGHPGYINFS[+79.966]YEVLTPLK.W		S[+80]	928.797	3	2784.38	2784.36	0	5.1	17	NRagged	227.22	227.22	19.23	3.65	1206	>sp|P02817|AMELX_BOVIN Amelogenin, X isoform OS=Bos taurus OX=9913 GN=AMELX PE=1 SV=2	1	hf1_10472_ebo_26_1_261219.ScanId;v=1;d1=26476.26476.3	controllerType=0 controllerNumber=1 scan=26476	55.2918
34368:4	1	S.MPLPPHPGHPGYINFS[+79.966]YEVLTPLK.W		S[+80]	696.849	4	2784.37	2784.36	0	4.4	17	NRagged	242.84	242.84	31.35	5.45	1206	>sp|P02817|AMELX_BOVIN Amelogenin, X isoform OS=Bos taurus OX=9913 GN=AMELX PE=1 SV=2	1	hf1_10472_ebo_26_1_261219.ScanId;v=1;d1=25476.25476.4	controllerType=0 controllerNumber=1 scan=25476	53.4926
38430:3	1	S.MPLPPHPGHPGYINFS[+79.966]YEVLTPLK.W		S[+80]	928.797	3	2784.37	2784.36	0	4.7	17	NRagged	252.79	252.79	86.31	5.31	1206	>sp|P02817|AMELX_BOVIN Amelogenin, X isoform OS=Bos taurus OX=9913 GN=AMELX PE=1 SV=2	1	hf1_10472_ebo_26_1_261219.ScanId;v=1;d1=28172.28172.3	controllerType=0 controllerNumber=1 scan=28172	58.3245
44855:4	1	S.MPLPPHPGHPGYINFS[+79.966]YEVLTPLK.W		S[+80]	696.849	4	2784.37	2784.36	0	4.5	17	NRagged	263.12	263.12	53.92	5.65	1206	>sp|P02817|AMELX_BOVIN Amelogenin, X isoform OS=Bos taurus OX=9913 GN=AMELX PE=1 SV=2	1	hf1_10472_ebo_26_1_261219.ScanId;v=1;d1=32552.32552.4	controllerType=0 controllerNumber=1 scan=32552	66.7201
31968:3	1	S.MPLPPHPGHPGYINFS[+79.966]YEVLTPLK.W		S[+80]	928.799	3	2784.38	2784.36	0	7.7	17	NRagged	280.19	280.19	122.38	5.66	1206	>sp|P02817|AMELX_BOVIN Amelogenin, X isoform OS=Bos taurus OX=9913 GN=AMELX PE=1 SV=2	1	hf1_10472_ebo_26_1_261219.ScanId;v=1;d1=23873.23873.3	controllerType=0 controllerNumber=1 scan=23873	50.6472
27009:3	1	S.M[+15.995]PLPPHPGHPGYINFSYEVLTPLK.W		M[+16]	907.472	3	2720.4	2720.39	0	3.7	17	NRagged	286.73	286.73	10.61	5.2	1206	>sp|P02817|AMELX_BOVIN Amelogenin, X isoform OS=Bos taurus OX=9913 GN=AMELX PE=1 SV=2	1	hf1_10472_ebo_26_1_261219.ScanId;v=1;d1=20494.20494.4	controllerType=0 controllerNumber=1 scan=20494	44.7266
39117:3	1	S.MPLPPHPGHPGYINFS[+79.966]YEVLTPLK.W		S[+80]	928.799	3	2784.38	2784.36	0	7.3	17	NRagged	287.43	287.43	94.24	5.66	1206	>sp|P02817|AMELX_BOVIN Amelogenin, X isoform OS=Bos taurus OX=9913 GN=AMELX PE=1 SV=2	1	hf1_10472_ebo_26_1_261219.ScanId;v=1;d1=28621.28621.3	controllerType=0 controllerNumber=1 scan=28621	59.1264
44786:3	1	S.MPLPPHPGHPGYINFS[+79.966]YEVLTPLK.W		S[+80]	928.8	3	2784.38	2784.36	0	8.1	17	NRagged	287.88	287.88	130.42	6.48	1206	>sp|P02817|AMELX_BOVIN Amelogenin, X isoform OS=Bos taurus OX=9913 GN=AMELX PE=1 SV=2	1	hf1_10472_ebo_26_1_261219.ScanId;v=1;d1=32467.32467.3	controllerType=0 controllerNumber=1 scan=32467	66.3861
40878:3	1	S.MPLPPHPGHPGYINFS[+79.966]YEVLTPLK.W		S[+80]	928.796	3	2784.37	2784.36	0	4.5	17	NRagged	292.25	292.25	133.71	5.62	1206	>sp|P02817|AMELX_BOVIN Amelogenin, X isoform OS=Bos taurus OX=9913 GN=AMELX PE=1 SV=2	1	hf1_10472_ebo_26_1_261219.ScanId;v=1;d1=29777.29777.4	controllerType=0 controllerNumber=1 scan=29777	61.1864
34790:4	1	S.MPLPPHPGHPGYINFS[+79.966]YEVLTPLK.W		S[+80]	696.85	4	2784.38	2784.36	0	6.2	17	NRagged	297.5	297.5	91.31	5.8	1206	>sp|P02817|AMELX_BOVIN Amelogenin, X isoform OS=Bos taurus OX=9913 GN=AMELX PE=1 SV=2	1	hf1_10472_ebo_26_1_261219.ScanId;v=1;d1=25770.25770.4	controllerType=0 controllerNumber=1 scan=25770	54.0232
44677:3	1	S.MPLPPHPGHPGYINFS[+79.966]YEVLTPLK.W		S[+80]	928.796	3	2784.37	2784.36	0	4.5	17	NRagged	314.31	314.31	129.64	6.04	1206	>sp|P02817|AMELX_BOVIN Amelogenin, X isoform OS=Bos taurus OX=9913 GN=AMELX PE=1 SV=2	1	hf1_10472_ebo_26_1_261219.ScanId;v=1;d1=32352.32352.3	controllerType=0 controllerNumber=1 scan=32352	66.0365
37654:3	1	S.MPLPPHPGHPGYINFS[+79.966]YEVLTPLK.W		S[+80]	928.796	3	2784.37	2784.36	0	4.1	17	NRagged	316.11	316.11	84.2	5.2	1206	>sp|P02817|AMELX_BOVIN Amelogenin, X isoform OS=Bos taurus OX=9913 GN=AMELX PE=1 SV=2	1	hf1_10472_ebo_26_1_261219.ScanId;v=1;d1=27661.27661.3	controllerType=0 controllerNumber=1 scan=27661	57.4054
32264:4	1	S.MPLPPHPGHPGYINFS[+79.966]YEVLTPLK.W		S[+80]	696.85	4	2784.38	2784.36	0	6	17	NRagged	324.18	324.18	95.31	5.75	1206	>sp|P02817|AMELX_BOVIN Amelogenin, X isoform OS=Bos taurus OX=9913 GN=AMELX PE=1 SV=2	1	hf1_10472_ebo_26_1_261219.ScanId;v=1;d1=24067.24067.4	controllerType=0 controllerNumber=1 scan=24067	50.9858
40489:3	1	S.MPLPPHPGHPGYINFS[+79.966]YEVLTPLK.W		S[+80]	928.796	3	2784.37	2784.36	0	4.4	17	NRagged	329.3	329.3	87.27	5.82	1206	>sp|P02817|AMELX_BOVIN Amelogenin, X isoform OS=Bos taurus OX=9913 GN=AMELX PE=1 SV=2	1	hf1_10472_ebo_26_1_261219.ScanId;v=1;d1=29519.29519.3	controllerType=0 controllerNumber=1 scan=29519	60.7251
46332:3	1	S.MPLPPHPGHPGYINFS[+79.966]YEVLTPLK.W		S[+80]	928.795	3	2784.37	2784.36	0	2.7	17	NRagged	330.98	330.98	155.83	6.42	1206	>sp|P02817|AMELX_BOVIN Amelogenin, X isoform OS=Bos taurus OX=9913 GN=AMELX PE=1 SV=2	1	hf1_10472_ebo_26_1_261219.ScanId;v=1;d1=34480.34480.3	controllerType=0 controllerNumber=1 scan=34480	73.9483
32583:4	1	S.MPLPPHPGHPGYINFS[+79.966]YEVLTPLK.W		S[+80]	696.85	4	2784.38	2784.36	0	5.1	17	NRagged	334.04	334.04	93.38	5.85	1206	>sp|P02817|AMELX_BOVIN Amelogenin, X isoform OS=Bos taurus OX=9913 GN=AMELX PE=1 SV=2	1	hf1_10472_ebo_26_1_261219.ScanId;v=1;d1=24268.24268.4	controllerType=0 controllerNumber=1 scan=24268	51.3419
44105:3	1	S.MPLPPHPGHPGYINFS[+79.966]YEVLTPLK.W		S[+80]	928.799	3	2784.38	2784.36	0	7.2	17	NRagged	336.48	336.48	154.92	6.18	1206	>sp|P02817|AMELX_BOVIN Amelogenin, X isoform OS=Bos taurus OX=9913 GN=AMELX PE=1 SV=2	1	hf1_10472_ebo_26_1_261219.ScanId;v=1;d1=31912.31912.3	controllerType=0 controllerNumber=1 scan=31912	65.0125
37683:3	1	S.MPLPPHPGHPGYINFS[+79.966]YEVLTPLK.W		S[+80]	928.795	3	2784.37	2784.36	0	2.9	17	NRagged	354.9	354.9	103.94	5.39	1206	>sp|P02817|AMELX_BOVIN Amelogenin, X isoform OS=Bos taurus OX=9913 GN=AMELX PE=1 SV=2	1	hf1_10472_ebo_26_1_261219.ScanId;v=1;d1=27680.27680.3	controllerType=0 controllerNumber=1 scan=27680	57.4399
27929:4	1	S.MP[+15.995]LPPHPGHPGYINFSYEVLTPLK.W		P[+16]	680.857	4	2720.41	2720.39	0	6.1	17	NRagged	379.74	379.74	5.8	7.09	1206	>sp|P02817|AMELX_BOVIN Amelogenin, X isoform OS=Bos taurus OX=9913 GN=AMELX PE=1 SV=2	1	hf1_10472_ebo_26_1_261219.ScanId;v=1;d1=21143.21143.4	controllerType=0 controllerNumber=1 scan=21143	45.8644
27613:4	1	S.MPLPPHPGHPGYINFS[+79.966]YEVLTPLK.W		S[+80]	696.842	4	2784.35	2784.36	0	-5.1	17	NRagged	383.19	383.19	142.79	5.31	1206	>sp|P02817|AMELX_BOVIN Amelogenin, X isoform OS=Bos taurus OX=9913 GN=AMELX PE=1 SV=2	1	hf1_10472_ebo_26_1_261219.ScanId;v=1;d1=20921.20921.4	controllerType=0 controllerNumber=1 scan=20921	45.4751
26413:3	1	S.M[+15.995]PLPPHPGHPGYINFSYEVLTPLK.W		M[+16]	907.473	3	2720.41	2720.39	0	5.6	17	NRagged	392.14	392.14	28.84	6.94	1206	>sp|P02817|AMELX_BOVIN Amelogenin, X isoform OS=Bos taurus OX=9913 GN=AMELX PE=1 SV=2	1	hf1_10472_ebo_26_1_261219.ScanId;v=1;d1=20091.20091.4	controllerType=0 controllerNumber=1 scan=20091	44.0313
44318:3	1	S.MPLPPHPGHPGYINFS[+79.966]YEVLTPLK.W		S[+80]	928.799	3	2784.38	2784.36	0	7.5	17	NRagged	394.2	394.2	126.05	7.81	1206	>sp|P02817|AMELX_BOVIN Amelogenin, X isoform OS=Bos taurus OX=9913 GN=AMELX PE=1 SV=2	1	hf1_10472_ebo_26_1_261219.ScanId;v=1;d1=32076.32076.3	controllerType=0 controllerNumber=1 scan=32076	65.3573
28283:4	1	S.MPLPPHPGHPGYINFS[+79.966]YEVLTPLK.W		S[+80]	696.849	4	2784.37	2784.36	0	4.3	17	NRagged	397.46	397.46	105.46	6.98	1206	>sp|P02817|AMELX_BOVIN Amelogenin, X isoform OS=Bos taurus OX=9913 GN=AMELX PE=1 SV=2	1	hf1_10472_ebo_26_1_261219.ScanId;v=1;d1=21382.21382.4	controllerType=0 controllerNumber=1 scan=21382	46.2828
43842:3	1	S.MPLPPHPGHPGYINFS[+79.966]YEVLTPLK.W		S[+80]	928.8	3	2784.38	2784.36	0	8.1	17	NRagged	413.9	413.9	171.5	7.82	1206	>sp|P02817|AMELX_BOVIN Amelogenin, X isoform OS=Bos taurus OX=9913 GN=AMELX PE=1 SV=2	1	hf1_10472_ebo_26_1_261219.ScanId;v=1;d1=31721.31721.3	controllerType=0 controllerNumber=1 scan=31721	64.6656
41296:3	1	S.MPLPPHPGHPGYINFS[+79.966]YEVLTPLK.W		S[+80]	928.798	3	2784.38	2784.36	0	6.2	17	NRagged	414.9	414.9	190.84	7.01	1206	>sp|P02817|AMELX_BOVIN Amelogenin, X isoform OS=Bos taurus OX=9913 GN=AMELX PE=1 SV=2	1	hf1_10472_ebo_26_1_261219.ScanId;v=1;d1=30054.30054.3	controllerType=0 controllerNumber=1 scan=30054	61.685
28974:5	1	S.MPLPPHPGHPGYINFS[+79.966]YEVLTPLK.W		S[+80]	557.682	5	2784.38	2784.36	0	5.9	17	NRagged	419.62	419.62	151.77	6.07	1206	>sp|P02817|AMELX_BOVIN Amelogenin, X isoform OS=Bos taurus OX=9913 GN=AMELX PE=1 SV=2	1	hf1_10472_ebo_26_1_261219.ScanId;v=1;d1=21855.21855.5	controllerType=0 controllerNumber=1 scan=21855	47.1084
27256:3	1	S.MPLPPHPGHPGYINFS[+79.966]YEVLTPLK.W		S[+80]	928.796	3	2784.37	2784.36	0	4.3	17	NRagged	424.85	424.85	180.72	7.07	1206	>sp|P02817|AMELX_BOVIN Amelogenin, X isoform OS=Bos taurus OX=9913 GN=AMELX PE=1 SV=2	1	hf1_10472_ebo_26_1_261219.ScanId;v=1;d1=20663.20663.3	controllerType=0 controllerNumber=1 scan=20663	45.0266
33691:3	1	S.MPLPPHPGHPGYINFS[+79.966]YEVLTPLK.W		S[+80]	928.799	3	2784.38	2784.36	0	7.5	17	NRagged	437.63	437.63	156.28	7.01	1206	>sp|P02817|AMELX_BOVIN Amelogenin, X isoform OS=Bos taurus OX=9913 GN=AMELX PE=1 SV=2	1	hf1_10472_ebo_26_1_261219.ScanId;v=1;d1=25009.25009.3	controllerType=0 controllerNumber=1 scan=25009	52.6575
41581:3	1	S.MPLPPHPGHPGYINFS[+79.966]YEVLTPLK.W		S[+80]	928.8	3	2784.39	2784.36	0	8.7	17	NRagged	439.67	439.67	138.2	6.49	1206	>sp|P02817|AMELX_BOVIN Amelogenin, X isoform OS=Bos taurus OX=9913 GN=AMELX PE=1 SV=2	1	hf1_10472_ebo_26_1_261219.ScanId;v=1;d1=30241.30241.4	controllerType=0 controllerNumber=1 scan=30241	62.0204
44473:3	1	S.MPLPPHPGHPGYINFS[+79.966]YEVLTPLK.W		S[+80]	928.798	3	2784.38	2784.36	0	6	17	NRagged	442.81	442.81	175.19	7.84	1206	>sp|P02817|AMELX_BOVIN Amelogenin, X isoform OS=Bos taurus OX=9913 GN=AMELX PE=1 SV=2	1	hf1_10472_ebo_26_1_261219.ScanId;v=1;d1=32199.32199.3	controllerType=0 controllerNumber=1 scan=32199	65.6958
36762:3	1	S.MPLPPHPGHPGYINFS[+79.966]YEVLTPLK.W		S[+80]	928.797	3	2784.38	2784.36	0	5.4	17	NRagged	446.78	446.78	149.06	7.02	1206	>sp|P02817|AMELX_BOVIN Amelogenin, X isoform OS=Bos taurus OX=9913 GN=AMELX PE=1 SV=2	1	hf1_10472_ebo_26_1_261219.ScanId;v=1;d1=27080.27080.3	controllerType=0 controllerNumber=1 scan=27080	56.3702
37974:3	1	S.MPLPPHPGHPGYINFS[+79.966]YEVLTPLK.W		S[+80]	928.796	3	2784.37	2784.36	0	3.7	17	NRagged	452.01	452.01	188.74	6.6	1206	>sp|P02817|AMELX_BOVIN Amelogenin, X isoform OS=Bos taurus OX=9913 GN=AMELX PE=1 SV=2	1	hf1_10472_ebo_26_1_261219.ScanId;v=1;d1=27875.27875.3	controllerType=0 controllerNumber=1 scan=27875	57.7922
40988:3	1	S.MPLPPHPGHPGYINFS[+79.966]YEVLTPLK.W		S[+80]	928.798	3	2784.38	2784.36	0	6.6	17	NRagged	469.19	469.19	127.29	7.18	1206	>sp|P02817|AMELX_BOVIN Amelogenin, X isoform OS=Bos taurus OX=9913 GN=AMELX PE=1 SV=2	1	hf1_10472_ebo_26_1_261219.ScanId;v=1;d1=29852.29852.3	controllerType=0 controllerNumber=1 scan=29852	61.3211
38315:3	1	S.MPLPPHPGHPGYINFS[+79.966]YEVLTPLK.W		S[+80]	928.798	3	2784.38	2784.36	0	6.3	17	NRagged	474.05	474.05	124.53	7.18	1206	>sp|P02817|AMELX_BOVIN Amelogenin, X isoform OS=Bos taurus OX=9913 GN=AMELX PE=1 SV=2	1	hf1_10472_ebo_26_1_261219.ScanId;v=1;d1=28096.28096.3	controllerType=0 controllerNumber=1 scan=28096	58.1869
34558:3	1	S.MPLPPHPGHPGYINFS[+79.966]YEVLTPLK.W		S[+80]	928.8	3	2784.39	2784.36	0	8.3	17	NRagged	482.38	482.38	174.01	6.79	1206	>sp|P02817|AMELX_BOVIN Amelogenin, X isoform OS=Bos taurus OX=9913 GN=AMELX PE=1 SV=2	1	hf1_10472_ebo_26_1_261219.ScanId;v=1;d1=25610.25610.3	controllerType=0 controllerNumber=1 scan=25610	53.735
32450:3	1	S.MPLPPHPGHPGYINFS[+79.966]YEVLTPLK.W		S[+80]	928.798	3	2784.38	2784.36	0	6.8	17	NRagged	494.46	494.46	115.33	7.11	1206	>sp|P02817|AMELX_BOVIN Amelogenin, X isoform OS=Bos taurus OX=9913 GN=AMELX PE=1 SV=2	1	hf1_10472_ebo_26_1_261219.ScanId;v=1;d1=24184.24184.3	controllerType=0 controllerNumber=1 scan=24184	51.1927
31241:4	1	S.MPLPPHPGHPGYINFS[+79.966]YEVLTPLK.W		S[+80]	696.851	4	2784.38	2784.36	0	7.6	17	NRagged	498.03	498.03	226.28	7.96	1206	>sp|P02817|AMELX_BOVIN Amelogenin, X isoform OS=Bos taurus OX=9913 GN=AMELX PE=1 SV=2	1	hf1_10472_ebo_26_1_261219.ScanId;v=1;d1=23397.23397.4	controllerType=0 controllerNumber=1 scan=23397	49.8099
32751:3	1	S.MPLPPHPGHPGYINFS[+79.966]YEVLTPLK.W		S[+80]	928.794	3	2784.37	2784.36	0	2.1	17	NRagged	500.23	500.23	193.39	6.11	1206	>sp|P02817|AMELX_BOVIN Amelogenin, X isoform OS=Bos taurus OX=9913 GN=AMELX PE=1 SV=2	1	hf1_10472_ebo_26_1_261219.ScanId;v=1;d1=24377.24377.3	controllerType=0 controllerNumber=1 scan=24377	51.5364
26125:3	1	S.M[+15.995]PLPPHPGHPGYINFSYEVLTPLK.W		M[+16]	907.473	3	2720.41	2720.39	0	5.5	17	NRagged	502.47	502.47	27.43	7.88	1206	>sp|P02817|AMELX_BOVIN Amelogenin, X isoform OS=Bos taurus OX=9913 GN=AMELX PE=1 SV=2	1	hf1_10472_ebo_26_1_261219.ScanId;v=1;d1=19891.19891.4	controllerType=0 controllerNumber=1 scan=19891	43.6855
33045:3	1	S.MPLPPHPGHPGYINFS[+79.966]YEVLTPLK.W		S[+80]	928.794	3	2784.37	2784.36	0	2.5	17	NRagged	509.09	509.09	121.45	6.64	1206	>sp|P02817|AMELX_BOVIN Amelogenin, X isoform OS=Bos taurus OX=9913 GN=AMELX PE=1 SV=2	1	hf1_10472_ebo_26_1_261219.ScanId;v=1;d1=24576.24576.3	controllerType=0 controllerNumber=1 scan=24576	51.8852
34468:3	1	S.MPLPPHPGHPGYINFS[+79.966]YEVLTPLK.W		S[+80]	928.799	3	2784.38	2784.36	0	7.7	17	NRagged	517.81	517.81	210.5	7.22	1206	>sp|P02817|AMELX_BOVIN Amelogenin, X isoform OS=Bos taurus OX=9913 GN=AMELX PE=1 SV=2	1	hf1_10472_ebo_26_1_261219.ScanId;v=1;d1=25545.25545.3	controllerType=0 controllerNumber=1 scan=25545	53.619
41905:3	1	S.MPLPPHPGHPGYINFS[+79.966]YEVLTPLK.W		S[+80]	928.798	3	2784.38	2784.36	0	5.8	17	NRagged	532.63	532.63	222.15	7.99	1206	>sp|P02817|AMELX_BOVIN Amelogenin, X isoform OS=Bos taurus OX=9913 GN=AMELX PE=1 SV=2	1	hf1_10472_ebo_26_1_261219.ScanId;v=1;d1=30450.30450.3	controllerType=0 controllerNumber=1 scan=30450	62.3945
26938:4	1	S.MP[+15.995]LPPHPGHPGYINFSYEVLTPLK.W		P[+16]	680.858	4	2720.41	2720.39	0	6.9	17	NRagged	535.21	535.21	5.8	8.06	1206	>sp|P02817|AMELX_BOVIN Amelogenin, X isoform OS=Bos taurus OX=9913 GN=AMELX PE=1 SV=2	1	hf1_10472_ebo_26_1_261219.ScanId;v=1;d1=20443.20443.4	controllerType=0 controllerNumber=1 scan=20443	44.6415
30913:4	1	S.MPLPPHPGHPGYINFS[+79.966]YEVLTPLK.W		S[+80]	696.849	4	2784.37	2784.36	0	4.4	17	NRagged	545.39	545.39	217.71	7.32	1206	>sp|P02817|AMELX_BOVIN Amelogenin, X isoform OS=Bos taurus OX=9913 GN=AMELX PE=1 SV=2	1	hf1_10472_ebo_26_1_261219.ScanId;v=1;d1=23182.23182.4	controllerType=0 controllerNumber=1 scan=23182	49.4343
28345:3	1	S.MPLPPHPGHPGYINFS[+79.966]YEVLTPLK.W		S[+80]	928.801	3	2784.39	2784.36	0	9.6	17	NRagged	560.84	560.84	245.92	8.52	1206	>sp|P02817|AMELX_BOVIN Amelogenin, X isoform OS=Bos taurus OX=9913 GN=AMELX PE=1 SV=2	1	hf1_10472_ebo_26_1_261219.ScanId;v=1;d1=21426.21426.3	controllerType=0 controllerNumber=1 scan=21426	46.3604
37359:3	1	S.MPLPPHPGHPGYINFS[+79.966]YEVLTPLK.W		S[+80]	928.791	3	2784.36	2784.36	0	-0.8	17	NRagged	572.36	572.36	252.77	7.26	1206	>sp|P02817|AMELX_BOVIN Amelogenin, X isoform OS=Bos taurus OX=9913 GN=AMELX PE=1 SV=2	1	hf1_10472_ebo_26_1_261219.ScanId;v=1;d1=27466.27466.3	controllerType=0 controllerNumber=1 scan=27466	57.059
26062:4	1	S.MP[+15.995]LPPHPGHPGYINFSYEVLTPLK.W		P[+16]	680.857	4	2720.41	2720.39	0	5.7	17	NRagged	588.86	588.86	5.8	8.83	1206	>sp|P02817|AMELX_BOVIN Amelogenin, X isoform OS=Bos taurus OX=9913 GN=AMELX PE=1 SV=2	1	hf1_10472_ebo_26_1_261219.ScanId;v=1;d1=19851.19851.4	controllerType=0 controllerNumber=1 scan=19851	43.6166
28747:3	1	S.MPLPPHPGHPGYINFS[+79.966]YEVLTPLK.W		S[+80]	928.797	3	2784.37	2784.36	0	4.7	17	NRagged	611.28	611.28	149.91	9.79	1206	>sp|P02817|AMELX_BOVIN Amelogenin, X isoform OS=Bos taurus OX=9913 GN=AMELX PE=1 SV=2	1	hf1_10472_ebo_26_1_261219.ScanId;v=1;d1=21694.21694.3	controllerType=0 controllerNumber=1 scan=21694	46.8263
32131:3	1	S.MPLPPHPGHPGYINFS[+79.966]YEVLTPLK.W		S[+80]	928.793	3	2784.37	2784.36	0	1.4	17	NRagged	625.62	625.62	212.05	8.13	1206	>sp|P02817|AMELX_BOVIN Amelogenin, X isoform OS=Bos taurus OX=9913 GN=AMELX PE=1 SV=2	1	hf1_10472_ebo_26_1_261219.ScanId;v=1;d1=23979.23979.3	controllerType=0 controllerNumber=1 scan=23979	50.8329
43558:3	1	S.MPLPPHPGHPGYINFS[+79.966]YEVLTPLK.W		S[+80]	928.798	3	2784.38	2784.36	0	6.6	17	NRagged	632.88	632.88	256.02	9.84	1206	>sp|P02817|AMELX_BOVIN Amelogenin, X isoform OS=Bos taurus OX=9913 GN=AMELX PE=1 SV=2	1	hf1_10472_ebo_26_1_261219.ScanId;v=1;d1=31529.31529.3	controllerType=0 controllerNumber=1 scan=31529	64.3214
31534:3	1	S.MPLPPHPGHPGYINFS[+79.966]YEVLTPLK.W		S[+80]	928.8	3	2784.38	2784.36	0	8	17	NRagged	637.73	637.73	241.86	9.84	1206	>sp|P02817|AMELX_BOVIN Amelogenin, X isoform OS=Bos taurus OX=9913 GN=AMELX PE=1 SV=2	1	hf1_10472_ebo_26_1_261219.ScanId;v=1;d1=23587.23587.3	controllerType=0 controllerNumber=1 scan=23587	50.1452
42512:3	1	S.MPLPPHPGHPGYINFS[+79.966]YEVLTPLK.W		S[+80]	928.797	3	2784.38	2784.36	0	5	17	NRagged	639.55	639.55	247.72	9.79	1206	>sp|P02817|AMELX_BOVIN Amelogenin, X isoform OS=Bos taurus OX=9913 GN=AMELX PE=1 SV=2	1	hf1_10472_ebo_26_1_261219.ScanId;v=1;d1=30842.30842.3	controllerType=0 controllerNumber=1 scan=30842	63.0975
26348:4	1	S.MP[+15.995]LPPHPGHPGYINFSYEVLTPLK.W		P[+16]	680.857	4	2720.41	2720.39	0	6.1	17	NRagged	651.49	648.68	5.8	10.83	1206	>sp|P02817|AMELX_BOVIN Amelogenin, X isoform OS=Bos taurus OX=9913 GN=AMELX PE=1 SV=2	1	hf1_10472_ebo_26_1_261219.ScanId;v=1;d1=20047.20047.4	controllerType=0 controllerNumber=1 scan=20047	43.9558
26649:4	1	S.MP[+15.995]LPPHPGHPGYINFSYEVLTPLK.W		P[+16]	680.857	4	2720.41	2720.39	0	5.4	17	NRagged	652.41	652.41	5.8	10.83	1206	>sp|P02817|AMELX_BOVIN Amelogenin, X isoform OS=Bos taurus OX=9913 GN=AMELX PE=1 SV=2	1	hf1_10472_ebo_26_1_261219.ScanId;v=1;d1=20246.20246.4	controllerType=0 controllerNumber=1 scan=20246	44.301
30614:4	1	S.MPLPPHPGHPGYINFS[+79.966]YEVLTPLK.W		S[+80]	696.849	4	2784.37	2784.36	0	4.6	17	NRagged	667	667	300.77	10.83	1206	>sp|P02817|AMELX_BOVIN Amelogenin, X isoform OS=Bos taurus OX=9913 GN=AMELX PE=1 SV=2	1	hf1_10472_ebo_26_1_261219.ScanId;v=1;d1=22980.22980.4	controllerType=0 controllerNumber=1 scan=22980	49.0749
29749:4	1	S.MPLPPHPGHPGYINFS[+79.966]YEVLTPLK.W		S[+80]	696.85	4	2784.38	2784.36	0	5.6	17	NRagged	688.18	688.18	332.93	10.83	1206	>sp|P02817|AMELX_BOVIN Amelogenin, X isoform OS=Bos taurus OX=9913 GN=AMELX PE=1 SV=2	1	hf1_10472_ebo_26_1_261219.ScanId;v=1;d1=22381.22381.4	controllerType=0 controllerNumber=1 scan=22381	48.0276
42822:3	1	S.MPLPPHPGHPGYINFS[+79.966]YEVLTPLK.W		S[+80]	928.799	3	2784.38	2784.36	0	7.5	17	NRagged	692.49	692.49	242.05	10.84	1206	>sp|P02817|AMELX_BOVIN Amelogenin, X isoform OS=Bos taurus OX=9913 GN=AMELX PE=1 SV=2	1	hf1_10472_ebo_26_1_261219.ScanId;v=1;d1=31039.31039.3	controllerType=0 controllerNumber=1 scan=31039	63.4507
29461:4	1	S.MPLPPHPGHPGYINFS[+79.966]YEVLTPLK.W		S[+80]	696.851	4	2784.38	2784.36	0	7.1	17	NRagged	764.14	764.14	390.62	12.87	1206	>sp|P02817|AMELX_BOVIN Amelogenin, X isoform OS=Bos taurus OX=9913 GN=AMELX PE=1 SV=2	1	hf1_10472_ebo_26_1_261219.ScanId;v=1;d1=22183.22183.4	controllerType=0 controllerNumber=1 scan=22183	47.6809
29165:4	1	S.MPLPPHPGHPGYINFS[+79.966]YEVLTPLK.W		S[+80]	696.85	4	2784.38	2784.36	0	6.1	17	NRagged	766.2	766.2	393.84	12.87	1206	>sp|P02817|AMELX_BOVIN Amelogenin, X isoform OS=Bos taurus OX=9913 GN=AMELX PE=1 SV=2	1	hf1_10472_ebo_26_1_261219.ScanId;v=1;d1=21985.21985.4	controllerType=0 controllerNumber=1 scan=21985	47.3343
31057:3	1	S.MPLPPHPGHPGYINFS[+79.966]YEVLTPLK.W		S[+80]	928.799	3	2784.38	2784.36	0	7.2	17	NRagged	767.79	767.79	336.71	12.84	1206	>sp|P02817|AMELX_BOVIN Amelogenin, X isoform OS=Bos taurus OX=9913 GN=AMELX PE=1 SV=2	1	hf1_10472_ebo_26_1_261219.ScanId;v=1;d1=23279.23279.3	controllerType=0 controllerNumber=1 scan=23279	49.6043
28881:4	1	S.MPLPPHPGHPGYINFS[+79.966]YEVLTPLK.W		S[+80]	696.85	4	2784.38	2784.36	0	6.4	17	NRagged	816.13	816.13	441.49	13.87	1206	>sp|P02817|AMELX_BOVIN Amelogenin, X isoform OS=Bos taurus OX=9913 GN=AMELX PE=1 SV=2	1	hf1_10472_ebo_26_1_261219.ScanId;v=1;d1=21787.21787.4	controllerType=0 controllerNumber=1 scan=21787	46.9899
30759:3	1	S.MPLPPHPGHPGYINFS[+79.966]YEVLTPLK.W		S[+80]	928.795	3	2784.37	2784.36	0	2.9	17	NRagged	864.03	864.03	392.6	14.37	1206	>sp|P02817|AMELX_BOVIN Amelogenin, X isoform OS=Bos taurus OX=9913 GN=AMELX PE=1 SV=2	1	hf1_10472_ebo_26_1_261219.ScanId;v=1;d1=23081.23081.3	controllerType=0 controllerNumber=1 scan=23081	49.2572
29564:2	1	S.MPLPPHPGHPGYINFS[+79.966]YEVLTPLK.W		S[+80]	1392.69	2	2784.38	2784.36	0	7.5	17	NRagged	902.42	902.42	372.49	14.98	1206	>sp|P02817|AMELX_BOVIN Amelogenin, X isoform OS=Bos taurus OX=9913 GN=AMELX PE=1 SV=2	1	hf1_10472_ebo_26_1_261219.ScanId;v=1;d1=22251.22251.2	controllerType=0 controllerNumber=1 scan=22251	47.7998
30469:3	1	S.MPLPPHPGHPGYINFS[+79.966]YEVLTPLK.W		S[+80]	928.795	3	2784.37	2784.36	0	2.9	17	NRagged	980.62	980.62	437.01	16.37	1206	>sp|P02817|AMELX_BOVIN Amelogenin, X isoform OS=Bos taurus OX=9913 GN=AMELX PE=1 SV=2	1	hf1_10472_ebo_26_1_261219.ScanId;v=1;d1=22888.22888.3	controllerType=0 controllerNumber=1 scan=22888	48.9132
29267:2	1	S.MPLPPHPGHPGYINFS[+79.966]YEVLTPLK.W		S[+80]	1392.69	2	2784.38	2784.36	0	6.8	17	NRagged	985.83	985.83	400.09	15.98	1206	>sp|P02817|AMELX_BOVIN Amelogenin, X isoform OS=Bos taurus OX=9913 GN=AMELX PE=1 SV=2	1	hf1_10472_ebo_26_1_261219.ScanId;v=1;d1=22053.22053.2	controllerType=0 controllerNumber=1 scan=22053	47.4528
29329:3	1	S.MPLPPHPGHPGYINFS[+79.966]YEVLTPLK.W		S[+80]	928.798	3	2784.38	2784.36	0	6.2	17	NRagged	1162.15	1162.15	534.4	20.84	1206	>sp|P02817|AMELX_BOVIN Amelogenin, X isoform OS=Bos taurus OX=9913 GN=AMELX PE=1 SV=2	1	hf1_10472_ebo_26_1_261219.ScanId;v=1;d1=22095.22095.3	controllerType=0 controllerNumber=1 scan=22095	47.5269
29621:3	1	S.MPLPPHPGHPGYINFS[+79.966]YEVLTPLK.W		S[+80]	928.798	3	2784.38	2784.36	0	6.4	17	NRagged	1191.61	1191.61	541.67	20.84	1206	>sp|P02817|AMELX_BOVIN Amelogenin, X isoform OS=Bos taurus OX=9913 GN=AMELX PE=1 SV=2	1	hf1_10472_ebo_26_1_261219.ScanId;v=1;d1=22293.22293.3	controllerType=0 controllerNumber=1 scan=22293	47.8745
29035:3	1	S.MPLPPHPGHPGYINFS[+79.966]YEVLTPLK.W		S[+80]	928.797	3	2784.38	2784.36	0	5.3	17	NRagged	1198.53	1198.53	557.8	20.79	1206	>sp|P02817|AMELX_BOVIN Amelogenin, X isoform OS=Bos taurus OX=9913 GN=AMELX PE=1 SV=2	1	hf1_10472_ebo_26_1_261219.ScanId;v=1;d1=21897.21897.3	controllerType=0 controllerNumber=1 scan=21897	47.1813
45066:3	1	S.MP[+15.995]LPPHPGHPGYINFS[+79.966]YEVLTPLK.W		P[+16], S[+80]	934.127	3	2800.37	2800.36	0	3.6	17	NRagged	19.08	19.08	4	2.36	1206	>sp|P02817|AMELX_BOVIN Amelogenin, X isoform OS=Bos taurus OX=9913 GN=AMELX PE=1 SV=2	1	hf1_10472_ebo_26_1_261219.ScanId;v=1;d1=32789.32789.3	controllerType=0 controllerNumber=1 scan=32789	67.4862
46421:3	1	S.MP[+15.995]LPPHPGHPGYINFS[+79.966]YEVLTPLK.W		P[+16], S[+80]	934.131	3	2800.38	2800.36	0	7.7	17	NRagged	35.74	35.74	4	3.03	1206	>sp|P02817|AMELX_BOVIN Amelogenin, X isoform OS=Bos taurus OX=9913 GN=AMELX PE=1 SV=2	1	hf1_10472_ebo_26_1_261219.ScanId;v=1;d1=34580.34580.3	controllerType=0 controllerNumber=1 scan=34580	74.3626
44873:3	1	S.M[+15.995]PLPPHPGHPGYINFS[+79.966]YEVLTPLK.W		M[+16], S[+80]	934.127	3	2800.37	2800.36	0	3.9	17	NRagged	72.25	72.25	30.97	2.65	1206	>sp|P02817|AMELX_BOVIN Amelogenin, X isoform OS=Bos taurus OX=9913 GN=AMELX PE=1 SV=2	1	hf1_10472_ebo_26_1_261219.ScanId;v=1;d1=32570.32570.3	controllerType=0 controllerNumber=1 scan=32570	66.7817
44009:4	1	S.MP[+15.995]LPPHPGHPGYINFS[+79.966]YEVLTPLK.W		P[+16], S[+80]	700.848	4	2800.37	2800.36	0	4.4	17	NRagged	97.49	97.49	4	3.01	1206	>sp|P02817|AMELX_BOVIN Amelogenin, X isoform OS=Bos taurus OX=9913 GN=AMELX PE=1 SV=2	1	hf1_10472_ebo_26_1_261219.ScanId;v=1;d1=31839.31839.4	controllerType=0 controllerNumber=1 scan=31839	64.8762
26605:4	1	S.MP[+15.995]LPPHPGHPGYINFS[+79.966]YEVLTPLK.W		P[+16], S[+80]	700.85	4	2800.38	2800.36	0	7.3	17	NRagged	107.9	107.9	3.4	2.49	1206	>sp|P02817|AMELX_BOVIN Amelogenin, X isoform OS=Bos taurus OX=9913 GN=AMELX PE=1 SV=2	1	hf1_10472_ebo_26_1_261219.ScanId;v=1;d1=20216.20216.2	controllerType=0 controllerNumber=1 scan=20216	44.2478
26074:3	1	S.M[+15.995]PLPPHPGHPGYINFS[+79.966]YEVLTPLK.W		M[+16], S[+80]	934.129	3	2800.37	2800.36	0	5.2	17	NRagged	126.6	126.6	6.81	2.2	1206	>sp|P02817|AMELX_BOVIN Amelogenin, X isoform OS=Bos taurus OX=9913 GN=AMELX PE=1 SV=2	1	hf1_10472_ebo_26_1_261219.ScanId;v=1;d1=19858.19858.4	controllerType=0 controllerNumber=1 scan=19858	43.6298
44673:4	1	S.MP[+15.995]LPPHPGHPGYINFS[+79.966]YEVLTPLK.W		P[+16], S[+80]	700.848	4	2800.37	2800.36	0	5.4	17	NRagged	171.94	171.94	4	4.13	1206	>sp|P02817|AMELX_BOVIN Amelogenin, X isoform OS=Bos taurus OX=9913 GN=AMELX PE=1 SV=2	1	hf1_10472_ebo_26_1_261219.ScanId;v=1;d1=32348.32348.4	controllerType=0 controllerNumber=1 scan=32348	66.0274
46344:3	1	S.M[+15.995]PLPPHPGHPGYINFS[+79.966]YEVLTPLK.W		M[+16], S[+80]	934.131	3	2800.38	2800.36	0	8	17	NRagged	177.84	177.84	15.65	4.14	1206	>sp|P02817|AMELX_BOVIN Amelogenin, X isoform OS=Bos taurus OX=9913 GN=AMELX PE=1 SV=2	1	hf1_10472_ebo_26_1_261219.ScanId;v=1;d1=34490.34490.3	controllerType=0 controllerNumber=1 scan=34490	73.9822
29992:4	1	S.MPLPP[+15.995]HPGHPGYINFS[+79.966]YEVLTPLK.W		P[+16], S[+80]	700.849	4	2800.37	2800.36	0	5.7	17	NRagged	190.81	190.81	0	3.41	1206	>sp|P02817|AMELX_BOVIN Amelogenin, X isoform OS=Bos taurus OX=9913 GN=AMELX PE=1 SV=2	1	hf1_10472_ebo_26_1_261219.ScanId;v=1;d1=22550.22550.3	controllerType=0 controllerNumber=1 scan=22550	48.3193
41208:3	1	S.MP[+15.995]LPPHPGHPGYINFS[+79.966]YEVLTPLK.W		P[+16], S[+80]	934.129	3	2800.37	2800.36	0	5.9	17	NRagged	192.15	192.15	5.8	4	1206	>sp|P02817|AMELX_BOVIN Amelogenin, X isoform OS=Bos taurus OX=9913 GN=AMELX PE=1 SV=2	1	hf1_10472_ebo_26_1_261219.ScanId;v=1;d1=29995.29995.3	controllerType=0 controllerNumber=1 scan=29995	61.5771
29028:4	1	S.MPLPPHPGHP[+31.990]GYINFS[+79.966]YEVLTPLK.W		P[+32], S[+80]	704.846	4	2816.36	2816.35	0	3.1	17	NRagged	194.28	194.28	12	3.43	1206	>sp|P02817|AMELX_BOVIN Amelogenin, X isoform OS=Bos taurus OX=9913 GN=AMELX PE=1 SV=2	1	hf1_10472_ebo_26_1_261219.ScanId;v=1;d1=21891.21891.4	controllerType=0 controllerNumber=1 scan=21891	47.1696
44319:3	1	S.MP[+15.995]LPPHPGHPGYINFS[+79.966]YEVLTPLK.W		P[+16], S[+80]	934.129	3	2800.37	2800.36	0	5.9	17	NRagged	203.12	203.12	4	4.7	1206	>sp|P02817|AMELX_BOVIN Amelogenin, X isoform OS=Bos taurus OX=9913 GN=AMELX PE=1 SV=2	1	hf1_10472_ebo_26_1_261219.ScanId;v=1;d1=32077.32077.3	controllerType=0 controllerNumber=1 scan=32077	65.3588
44107:3	1	S.M[+15.995]PLPPHPGHPGYINFS[+79.966]YEVLTPLK.W		M[+16], S[+80]	934.129	3	2800.37	2800.36	0	5.6	17	NRagged	211.38	211.38	18.19	4.28	1206	>sp|P02817|AMELX_BOVIN Amelogenin, X isoform OS=Bos taurus OX=9913 GN=AMELX PE=1 SV=2	1	hf1_10472_ebo_26_1_261219.ScanId;v=1;d1=31913.31913.3	controllerType=0 controllerNumber=1 scan=31913	65.014
31198:3	1	S.M[+15.995]PLPPHPGHPGYINFS[+79.966]YEVLTPLK.W		M[+16], S[+80]	934.128	3	2800.37	2800.36	0	3.9	17	NRagged	232.18	232.18	14.48	3.86	1206	>sp|P02817|AMELX_BOVIN Amelogenin, X isoform OS=Bos taurus OX=9913 GN=AMELX PE=1 SV=2	1	hf1_10472_ebo_26_1_261219.ScanId;v=1;d1=23369.23369.3	controllerType=0 controllerNumber=1 scan=23369	49.7619
44489:3	1	S.MP[+15.995]LPPHPGHPGYINFS[+79.966]YEVLTPLK.W		P[+16], S[+80]	934.129	3	2800.37	2800.36	0	5.2	17	NRagged	234.9	234.9	4	4.7	1206	>sp|P02817|AMELX_BOVIN Amelogenin, X isoform OS=Bos taurus OX=9913 GN=AMELX PE=1 SV=2	1	hf1_10472_ebo_26_1_261219.ScanId;v=1;d1=32209.32209.3	controllerType=0 controllerNumber=1 scan=32209	65.7138
41505:3	1	S.MP[+15.995]LPPHPGHPGYINFS[+79.966]YEVLTPLK.W		P[+16], S[+80]	934.132	3	2800.38	2800.36	0	8.4	17	NRagged	246.91	246.91	4	5.04	1206	>sp|P02817|AMELX_BOVIN Amelogenin, X isoform OS=Bos taurus OX=9913 GN=AMELX PE=1 SV=2	1	hf1_10472_ebo_26_1_261219.ScanId;v=1;d1=30194.30194.3	controllerType=0 controllerNumber=1 scan=30194	61.9368
39124:3	1	S.M[+15.995]PLPPHPGHPGYINFS[+79.966]YEVLTPLK.W		M[+16], S[+80]	934.129	3	2800.37	2800.36	0	6	17	NRagged	248.85	248.85	18.2	5.31	1206	>sp|P02817|AMELX_BOVIN Amelogenin, X isoform OS=Bos taurus OX=9913 GN=AMELX PE=1 SV=2	1	hf1_10472_ebo_26_1_261219.ScanId;v=1;d1=28625.28625.3	controllerType=0 controllerNumber=1 scan=28625	59.1324
27325:4	1	S.MPLPPHPGHPGYIN[+0.984]FS[+79.966]YEVLTPLK.W		N[+1], S[+80]	697.095	4	2785.36	2785.35	0	4.2	17	NRagged	253.51	253.51	77.42	5.35	1206	>sp|P02817|AMELX_BOVIN Amelogenin, X isoform OS=Bos taurus OX=9913 GN=AMELX PE=1 SV=2	1	hf1_10472_ebo_26_1_261219.ScanId;v=1;d1=20716.20716.4	controllerType=0 controllerNumber=1 scan=20716	45.1174
27614:4	1	S.MPLPPHPGHPGYIN[+0.984]FS[+79.966]YEVLTPLK.W		N[+1], S[+80]	697.095	4	2785.36	2785.35	0	4.4	17	NRagged	258.78	258.78	21.7	5.15	1206	>sp|P02817|AMELX_BOVIN Amelogenin, X isoform OS=Bos taurus OX=9913 GN=AMELX PE=1 SV=2	1	hf1_10472_ebo_26_1_261219.ScanId;v=1;d1=20921.20921.4	controllerType=0 controllerNumber=1 scan=20921	45.4751
30340:3	1	S.M[+15.995]PLPPHPGHPGYINFS[+79.966]YEVLTPLK.W		M[+16], S[+80]	934.132	3	2800.38	2800.36	0	8.3	17	NRagged	260.81	260.81	8.25	5.04	1206	>sp|P02817|AMELX_BOVIN Amelogenin, X isoform OS=Bos taurus OX=9913 GN=AMELX PE=1 SV=2	1	hf1_10472_ebo_26_1_261219.ScanId;v=1;d1=22797.22797.6	controllerType=0 controllerNumber=1 scan=22797	48.7535
41852:3	1	S.MP[+15.995]LPPHPGHPGYINFS[+79.966]YEVLTPLK.W		P[+16], S[+80]	934.128	3	2800.37	2800.36	0	4.8	17	NRagged	263.25	263.25	19.86	5.31	1206	>sp|P02817|AMELX_BOVIN Amelogenin, X isoform OS=Bos taurus OX=9913 GN=AMELX PE=1 SV=2	1	hf1_10472_ebo_26_1_261219.ScanId;v=1;d1=30417.30417.3	controllerType=0 controllerNumber=1 scan=30417	62.3355
44701:3	1	S.MP[+15.995]LPPHPGHPGYINFS[+79.966]YEVLTPLK.W		P[+16], S[+80]	934.127	3	2800.37	2800.36	0	3.5	17	NRagged	263.4	263.4	4	6.01	1206	>sp|P02817|AMELX_BOVIN Amelogenin, X isoform OS=Bos taurus OX=9913 GN=AMELX PE=1 SV=2	1	hf1_10472_ebo_26_1_261219.ScanId;v=1;d1=32375.32375.3	controllerType=0 controllerNumber=1 scan=32375	66.0986
37670:3	1	S.M[+15.995]PLPPHPGHPGYINFS[+79.966]YEVLTPLK.W		M[+16], S[+80]	934.127	3	2800.37	2800.36	0	3.8	17	NRagged	267.41	267.41	12.05	4.89	1206	>sp|P02817|AMELX_BOVIN Amelogenin, X isoform OS=Bos taurus OX=9913 GN=AMELX PE=1 SV=2	1	hf1_10472_ebo_26_1_261219.ScanId;v=1;d1=27673.27673.3	controllerType=0 controllerNumber=1 scan=27673	57.4293
32882:3	1	S.MP[+15.995]LPPHPGHPGYINFS[+79.966]YEVLTPLK.W		P[+16], S[+80]	934.127	3	2800.37	2800.36	0	3	17	NRagged	299.07	299.07	5.8	5	1206	>sp|P02817|AMELX_BOVIN Amelogenin, X isoform OS=Bos taurus OX=9913 GN=AMELX PE=1 SV=2	1	hf1_10472_ebo_26_1_261219.ScanId;v=1;d1=24465.24465.3	controllerType=0 controllerNumber=1 scan=24465	51.6891
31432:3	1	S.MPLPPHPGHPGYINF[+31.990]SY[+31.990]EVLTPLK.W		F[+32], Y[+32]	923.456	3	2768.35	2768.38	0	-7.4	17	NRagged	299.17	299.17	6.27	4.21	1206	>sp|P02817|AMELX_BOVIN Amelogenin, X isoform OS=Bos taurus OX=9913 GN=AMELX PE=1 SV=2	1	hf1_10472_ebo_26_1_261219.ScanId;v=1;d1=23524.23524.3	controllerType=0 controllerNumber=1 scan=23524	50.0349
27483:3	1	S.MPLPPHPGHPGYIN[+0.984]FS[+79.966]YEVLTPLK.W		N[+1], S[+80]	929.125	3	2785.36	2785.35	0	4.8	17	NRagged	301.79	301.79	119.94	5.72	1206	>sp|P02817|AMELX_BOVIN Amelogenin, X isoform OS=Bos taurus OX=9913 GN=AMELX PE=1 SV=2	1	hf1_10472_ebo_26_1_261219.ScanId;v=1;d1=20828.20828.3	controllerType=0 controllerNumber=1 scan=20828	45.3143
40850:3	1	S.M[+15.995]PLPPHPGHPGYINFS[+79.966]YEVLTPLK.W		M[+16], S[+80]	934.13	3	2800.37	2800.36	0	6.2	17	NRagged	303.93	303.93	10.41	5.76	1206	>sp|P02817|AMELX_BOVIN Amelogenin, X isoform OS=Bos taurus OX=9913 GN=AMELX PE=1 SV=2	1	hf1_10472_ebo_26_1_261219.ScanId;v=1;d1=29758.29758.3	controllerType=0 controllerNumber=1 scan=29758	61.1518
39419:3	1	S.M[+15.995]PLPPHPGHPGYINFS[+79.966]YEVLTPLK.W		M[+16], S[+80]	934.127	3	2800.37	2800.36	0	3.3	17	NRagged	311.22	311.22	5.26	5	1206	>sp|P02817|AMELX_BOVIN Amelogenin, X isoform OS=Bos taurus OX=9913 GN=AMELX PE=1 SV=2	1	hf1_10472_ebo_26_1_261219.ScanId;v=1;d1=28826.28826.4	controllerType=0 controllerNumber=1 scan=28826	59.4921
28941:3	1	S.MP[+31.990]LPPHPGHPGYINFS[+79.966]YEVLTPLK.W		P[+32], S[+80]	939.457	3	2816.36	2816.35	0	1.9	17	NRagged	313.86	313.86	1.8	4.77	1206	>sp|P02817|AMELX_BOVIN Amelogenin, X isoform OS=Bos taurus OX=9913 GN=AMELX PE=1 SV=2	1	hf1_10472_ebo_26_1_261219.ScanId;v=1;d1=21829.21829.3	controllerType=0 controllerNumber=1 scan=21829	47.0613
38197:3	1	S.M[+15.995]PLPPHPGHPGYINFS[+79.966]YEVLTPLK.W		M[+16], S[+80]	934.13	3	2800.38	2800.36	0	6.7	17	NRagged	314.53	314.53	10.73	5.66	1206	>sp|P02817|AMELX_BOVIN Amelogenin, X isoform OS=Bos taurus OX=9913 GN=AMELX PE=1 SV=2	1	hf1_10472_ebo_26_1_261219.ScanId;v=1;d1=28021.28021.3	controllerType=0 controllerNumber=1 scan=28021	58.0533
37490:3	1	S.M[+15.995]PLPPHPGHPGYINFS[+79.966]YEVLTPLK.W		M[+16], S[+80]	934.129	3	2800.37	2800.36	0	5	17	NRagged	319.53	319.53	31.59	5.62	1206	>sp|P02817|AMELX_BOVIN Amelogenin, X isoform OS=Bos taurus OX=9913 GN=AMELX PE=1 SV=2	1	hf1_10472_ebo_26_1_261219.ScanId;v=1;d1=27553.27553.3	controllerType=0 controllerNumber=1 scan=27553	57.2136
42155:3	1	S.M[+15.995]PLPPHPGHPGYINFS[+79.966]YEVLTPLK.W		M[+16], S[+80]	934.129	3	2800.37	2800.36	0	5.7	17	NRagged	324.05	324.05	5.98	5.82	1206	>sp|P02817|AMELX_BOVIN Amelogenin, X isoform OS=Bos taurus OX=9913 GN=AMELX PE=1 SV=2	1	hf1_10472_ebo_26_1_261219.ScanId;v=1;d1=30612.30612.3	controllerType=0 controllerNumber=1 scan=30612	62.6856
30937:4	1	S.MPLPPHPGHPGY[+31.990]INFSY[+31.990]EVLTPLK.W		Y[+32]*2	692.845	4	2768.36	2768.38	0	-6.7	17	NRagged	326.78	326.78	0	4.63	1206	>sp|P02817|AMELX_BOVIN Amelogenin, X isoform OS=Bos taurus OX=9913 GN=AMELX PE=1 SV=2	1	hf1_10472_ebo_26_1_261219.ScanId;v=1;d1=23197.23197.4	controllerType=0 controllerNumber=1 scan=23197	49.4596
33692:3	1	S.MPLPPHPGHPGYIN[+0.984]FS[+79.966]YEVLTPLK.W		N[+1], S[+80]	929.126	3	2785.36	2785.35	0	6.4	17	NRagged	328.21	328.21	119.64	5.76	1206	>sp|P02817|AMELX_BOVIN Amelogenin, X isoform OS=Bos taurus OX=9913 GN=AMELX PE=1 SV=2	1	hf1_10472_ebo_26_1_261219.ScanId;v=1;d1=25009.25009.3	controllerType=0 controllerNumber=1 scan=25009	52.6575
38608:3	1	S.M[+15.995]PLPPHPGHPGYINFS[+79.966]YEVLTPLK.W		M[+16], S[+80]	934.13	3	2800.38	2800.36	0	6.6	17	NRagged	373.81	373.81	25.15	6.68	1206	>sp|P02817|AMELX_BOVIN Amelogenin, X isoform OS=Bos taurus OX=9913 GN=AMELX PE=1 SV=2	1	hf1_10472_ebo_26_1_261219.ScanId;v=1;d1=28287.28287.4	controllerType=0 controllerNumber=1 scan=28287	58.5277
37795:3	1	S.M[+15.995]PLPPHPGHPGYINFS[+79.966]YEVLTPLK.W		M[+16], S[+80]	934.128	3	2800.37	2800.36	0	3.9	17	NRagged	378.31	378.31	28.04	6.31	1206	>sp|P02817|AMELX_BOVIN Amelogenin, X isoform OS=Bos taurus OX=9913 GN=AMELX PE=1 SV=2	1	hf1_10472_ebo_26_1_261219.ScanId;v=1;d1=27756.27756.4	controllerType=0 controllerNumber=1 scan=27756	57.5775
30887:3	1	S.MP[+15.995]LPPHPGHPGYINFS[+79.966]YEVLTPLK.W		P[+16], S[+80]	934.128	3	2800.37	2800.36	0	4.3	17	NRagged	387.6	387.6	5.8	6.74	1206	>sp|P02817|AMELX_BOVIN Amelogenin, X isoform OS=Bos taurus OX=9913 GN=AMELX PE=1 SV=2	1	hf1_10472_ebo_26_1_261219.ScanId;v=1;d1=23165.23165.3	controllerType=0 controllerNumber=1 scan=23165	49.4033
43549:3	1	S.M[+15.995]PLPPHPGHPGYINFS[+79.966]YEVLTPLK.W		M[+16], S[+80]	934.131	3	2800.38	2800.36	0	7.3	17	NRagged	413.73	413.73	26.27	6.8	1206	>sp|P02817|AMELX_BOVIN Amelogenin, X isoform OS=Bos taurus OX=9913 GN=AMELX PE=1 SV=2	1	hf1_10472_ebo_26_1_261219.ScanId;v=1;d1=31524.31524.3	controllerType=0 controllerNumber=1 scan=31524	64.3138
42776:3	1	S.M[+15.995]PLPPHPGHPGYINFS[+79.966]YEVLTPLK.W		M[+16], S[+80]	934.128	3	2800.37	2800.36	0	4.3	17	NRagged	460.54	460.54	29.98	7.84	1206	>sp|P02817|AMELX_BOVIN Amelogenin, X isoform OS=Bos taurus OX=9913 GN=AMELX PE=1 SV=2	1	hf1_10472_ebo_26_1_261219.ScanId;v=1;d1=31010.31010.3	controllerType=0 controllerNumber=1 scan=31010	63.3974
43843:3	1	S.MP[+15.995]LPPHPGHPGYINFS[+79.966]YEVLTPLK.W		P[+16], S[+80]	934.13	3	2800.38	2800.36	0	7.1	17	NRagged	479.24	479.24	5.8	7.18	1206	>sp|P02817|AMELX_BOVIN Amelogenin, X isoform OS=Bos taurus OX=9913 GN=AMELX PE=1 SV=2	1	hf1_10472_ebo_26_1_261219.ScanId;v=1;d1=31722.31722.3	controllerType=0 controllerNumber=1 scan=31722	64.6671
29562:4	1	S.MPLP[+15.995]PHPGHPGYINFS[+79.966]YEVLTPLK.W		P[+16], S[+80]	700.846	4	2800.36	2800.36	0	2.6	17	NRagged	504.5	504.5	10.62	6.78	1206	>sp|P02817|AMELX_BOVIN Amelogenin, X isoform OS=Bos taurus OX=9913 GN=AMELX PE=1 SV=2	1	hf1_10472_ebo_26_1_261219.ScanId;v=1;d1=22250.22250.4	controllerType=0 controllerNumber=1 scan=22250	47.7982
29851:4	1	S.MPLPP[+15.995]HPGHPGYINFS[+79.966]YEVLTPLK.W		P[+16], S[+80]	700.847	4	2800.37	2800.36	0	4	17	NRagged	505.32	505.32	6.44	6.78	1206	>sp|P02817|AMELX_BOVIN Amelogenin, X isoform OS=Bos taurus OX=9913 GN=AMELX PE=1 SV=2	1	hf1_10472_ebo_26_1_261219.ScanId;v=1;d1=22450.22450.4	controllerType=0 controllerNumber=1 scan=22450	48.1453
29266:4	1	S.MPLPPHP[+15.995]GHPGYINFS[+79.966]YEVLTPLK.W		P[+16], S[+80]	700.847	4	2800.37	2800.36	0	3.7	17	NRagged	563.53	563.53	0.94	7.7	1206	>sp|P02817|AMELX_BOVIN Amelogenin, X isoform OS=Bos taurus OX=9913 GN=AMELX PE=1 SV=2	1	hf1_10472_ebo_26_1_261219.ScanId;v=1;d1=22052.22052.4	controllerType=0 controllerNumber=1 scan=22052	47.4512
32260:3	1	S.M[+15.995]PLPPHPGHPGYINFS[+79.966]YEVLTPLK.W		M[+16], S[+80]	934.128	3	2800.37	2800.36	0	5	17	NRagged	603.88	603.88	6.8	9.79	1206	>sp|P02817|AMELX_BOVIN Amelogenin, X isoform OS=Bos taurus OX=9913 GN=AMELX PE=1 SV=2	1	hf1_10472_ebo_26_1_261219.ScanId;v=1;d1=24065.24065.3	controllerType=0 controllerNumber=1 scan=24065	50.9828
28971:4	1	S.MPLPPHPGHPGY[+15.995]INFS[+79.966]YEVLTPLK.W		S[+80], Y[+16]	700.847	4	2800.37	2800.36	0	3.5	17	NRagged	665.83	665.83	3.59	10.4	1206	>sp|P02817|AMELX_BOVIN Amelogenin, X isoform OS=Bos taurus OX=9913 GN=AMELX PE=1 SV=2	1	hf1_10472_ebo_26_1_261219.ScanId;v=1;d1=21853.21853.4	controllerType=0 controllerNumber=1 scan=21853	47.1059
27262:4	1	S.M[+15.995]PLPPHPGHPGYINFS[+79.966]YEVLTPLK.W		M[+16], S[+80]	700.848	4	2800.37	2800.36	0	5.4	17	NRagged	692.34	692.34	7.47	10.83	1206	>sp|P02817|AMELX_BOVIN Amelogenin, X isoform OS=Bos taurus OX=9913 GN=AMELX PE=1 SV=2	1	hf1_10472_ebo_26_1_261219.ScanId;v=1;d1=20666.20666.4	controllerType=0 controllerNumber=1 scan=20666	45.0302
46211:4	1	S.MP[+15.995]LPPHPGHPGYINFS[+79.966]YEVLTPLK.W		P[+16], S[+80]	700.849	4	2800.37	2800.36	0	5.9	17	NRagged	696.28	696.28	5.8	10.83	1206	>sp|P02817|AMELX_BOVIN Amelogenin, X isoform OS=Bos taurus OX=9913 GN=AMELX PE=1 SV=2	1	hf1_10472_ebo_26_1_261219.ScanId;v=1;d1=34363.34363.4	controllerType=0 controllerNumber=1 scan=34363	73.5765
30032:4	1	S.MPLPPHPGHPGYIN[+0.984]FS[+79.966]YEVLTPLK.W		N[+1], S[+80]	697.097	4	2785.37	2785.35	0	6.9	17	NRagged	701.33	701.33	346.87	11.87	1206	>sp|P02817|AMELX_BOVIN Amelogenin, X isoform OS=Bos taurus OX=9913 GN=AMELX PE=1 SV=2	1	hf1_10472_ebo_26_1_261219.ScanId;v=1;d1=22579.22579.4	controllerType=0 controllerNumber=1 scan=22579	48.3713
27533:4	1	S.M[+15.995]PLPPHPGHPGYINFS[+79.966]YEVLTPLK.W		M[+16], S[+80]	700.849	4	2800.37	2800.36	0	5.8	17	NRagged	713.03	713.03	7.46	11.83	1206	>sp|P02817|AMELX_BOVIN Amelogenin, X isoform OS=Bos taurus OX=9913 GN=AMELX PE=1 SV=2	1	hf1_10472_ebo_26_1_261219.ScanId;v=1;d1=20863.20863.4	controllerType=0 controllerNumber=1 scan=20863	45.3757
28694:4	1	S.MPLPPHPGHP[+15.995]GYINFS[+79.966]YEVLTPLK.W		P[+16], S[+80]	700.849	4	2800.37	2800.36	0	6.4	17	NRagged	716.97	716.97	0.61	11.87	1206	>sp|P02817|AMELX_BOVIN Amelogenin, X isoform OS=Bos taurus OX=9913 GN=AMELX PE=1 SV=2	1	hf1_10472_ebo_26_1_261219.ScanId;v=1;d1=21657.21657.4	controllerType=0 controllerNumber=1 scan=21657	46.7634
27814:4	1	S.MP[+15.995]LPPHPGHPGYINFS[+79.966]YEVLTPLK.W		P[+16], S[+80]	700.85	4	2800.38	2800.36	0	7.3	17	NRagged	742.21	742.21	4	11.87	1206	>sp|P02817|AMELX_BOVIN Amelogenin, X isoform OS=Bos taurus OX=9913 GN=AMELX PE=1 SV=2	1	hf1_10472_ebo_26_1_261219.ScanId;v=1;d1=21061.21061.4	controllerType=0 controllerNumber=1 scan=21061	45.7235
28252:3	1	S.MP[+31.990]LPPHPGHPGYINFS[+79.966]YEVLTPLK.W		P[+32], S[+80]	939.461	3	2816.37	2816.35	0	5.8	17	NRagged	754.58	754.58	6.73	12.79	1206	>sp|P02817|AMELX_BOVIN Amelogenin, X isoform OS=Bos taurus OX=9913 GN=AMELX PE=1 SV=2	1	hf1_10472_ebo_26_1_261219.ScanId;v=1;d1=21363.21363.3	controllerType=0 controllerNumber=1 scan=21363	46.2487
27852:2	1	S.M[+15.995]PLPPHPGHPGYINFS[+79.966]YEVLTPLK.W		M[+16], S[+80]	1400.69	2	2800.37	2800.36	0	6.4	17	NRagged	757.71	757.71	52.87	11.28	1206	>sp|P02817|AMELX_BOVIN Amelogenin, X isoform OS=Bos taurus OX=9913 GN=AMELX PE=1 SV=2	1	hf1_10472_ebo_26_1_261219.ScanId;v=1;d1=21087.21087.2	controllerType=0 controllerNumber=1 scan=21087	45.7672
27564:2	1	S.M[+15.995]PLPPHPGHPGYINFS[+79.966]YEVLTPLK.W		M[+16], S[+80]	1400.69	2	2800.38	2800.36	0	7.7	17	NRagged	763.74	763.74	63.23	11.98	1206	>sp|P02817|AMELX_BOVIN Amelogenin, X isoform OS=Bos taurus OX=9913 GN=AMELX PE=1 SV=2	1	hf1_10472_ebo_26_1_261219.ScanId;v=1;d1=20887.20887.2	controllerType=0 controllerNumber=1 scan=20887	45.416
28105:4	1	S.M[+15.995]PLPPHPGHPGYINFS[+79.966]YEVLTPLK.W		M[+16], S[+80]	700.849	4	2800.38	2800.36	0	6.6	17	NRagged	763.9	763.9	5.45	12.87	1206	>sp|P02817|AMELX_BOVIN Amelogenin, X isoform OS=Bos taurus OX=9913 GN=AMELX PE=1 SV=2	1	hf1_10472_ebo_26_1_261219.ScanId;v=1;d1=21259.21259.4	controllerType=0 controllerNumber=1 scan=21259	46.0685
29790:3	1	S.M[+15.995]PLPPHPGHPGYINFS[+79.966]YEVLTPLK.W		M[+16], S[+80]	934.126	3	2800.36	2800.36	0	2.6	17	NRagged	765.34	765.34	16.74	12.37	1206	>sp|P02817|AMELX_BOVIN Amelogenin, X isoform OS=Bos taurus OX=9913 GN=AMELX PE=1 SV=2	1	hf1_10472_ebo_26_1_261219.ScanId;v=1;d1=22409.22409.3	controllerType=0 controllerNumber=1 scan=22409	48.0743
30313:4	1	S.MPLPPHPGHPGYIN[+0.984]FS[+79.966]YEVLTPLK.W		N[+1], S[+80]	697.097	4	2785.37	2785.35	0	8	17	NRagged	776.06	776.06	433.72	12.87	1206	>sp|P02817|AMELX_BOVIN Amelogenin, X isoform OS=Bos taurus OX=9913 GN=AMELX PE=1 SV=2	1	hf1_10472_ebo_26_1_261219.ScanId;v=1;d1=22778.22778.4	controllerType=0 controllerNumber=1 scan=22778	48.723
29495:3	1	S.MPLPP[+15.995]HPGHPGYINFS[+79.966]YEVLTPLK.W		P[+16], S[+80]	934.127	3	2800.37	2800.36	0	3.1	17	NRagged	787.09	787.09	4.51	12.37	1206	>sp|P02817|AMELX_BOVIN Amelogenin, X isoform OS=Bos taurus OX=9913 GN=AMELX PE=1 SV=2	1	hf1_10472_ebo_26_1_261219.ScanId;v=1;d1=22205.22205.3	controllerType=0 controllerNumber=1 scan=22205	47.7197
27285:2	1	S.M[+15.995]PLPPHPGHPGYINFS[+79.966]YEVLTPLK.W		M[+16], S[+80]	1400.69	2	2800.38	2800.36	0	7.5	17	NRagged	809.68	809.68	49.89	12.98	1206	>sp|P02817|AMELX_BOVIN Amelogenin, X isoform OS=Bos taurus OX=9913 GN=AMELX PE=1 SV=2	1	hf1_10472_ebo_26_1_261219.ScanId;v=1;d1=20687.20687.2	controllerType=0 controllerNumber=1 scan=20687	45.0657
27199:3	1	S.M[+15.995]PLPPHPGHPGYINFS[+79.966]YEVLTPLK.W		M[+16], S[+80]	934.127	3	2800.37	2800.36	0	3.8	17	NRagged	843.11	843.11	29.45	13.37	1206	>sp|P02817|AMELX_BOVIN Amelogenin, X isoform OS=Bos taurus OX=9913 GN=AMELX PE=1 SV=2	1	hf1_10472_ebo_26_1_261219.ScanId;v=1;d1=20624.20624.3	controllerType=0 controllerNumber=1 scan=20624	44.956
28625:3	1	S.M[+15.995]PLPPHPGHPGYINFS[+79.966]YEVLTPLK.W		M[+16], S[+80]	934.128	3	2800.37	2800.36	0	4.2	17	NRagged	853.15	853.15	1.29	14.79	1206	>sp|P02817|AMELX_BOVIN Amelogenin, X isoform OS=Bos taurus OX=9913 GN=AMELX PE=1 SV=2	1	hf1_10472_ebo_26_1_261219.ScanId;v=1;d1=21612.21612.3	controllerType=0 controllerNumber=1 scan=21612	46.6852
29200:3	1	S.MPLPPHP[+15.995]GHPGYINFS[+79.966]YEVLTPLK.W		P[+16], S[+80]	934.126	3	2800.36	2800.36	0	2.2	17	NRagged	938.66	938.66	15.58	14.84	1206	>sp|P02817|AMELX_BOVIN Amelogenin, X isoform OS=Bos taurus OX=9913 GN=AMELX PE=1 SV=2	1	hf1_10472_ebo_26_1_261219.ScanId;v=1;d1=22007.22007.3	controllerType=0 controllerNumber=1 scan=22007	47.3727
28912:3	1	S.MPLPPHPGHP[+15.995]GYINFS[+79.966]YEVLTPLK.W		P[+16], S[+80]	934.128	3	2800.37	2800.36	0	4.5	17	NRagged	1039.25	1039.25	6.94	17.79	1206	>sp|P02817|AMELX_BOVIN Amelogenin, X isoform OS=Bos taurus OX=9913 GN=AMELX PE=1 SV=2	1	hf1_10472_ebo_26_1_261219.ScanId;v=1;d1=21809.21809.3	controllerType=0 controllerNumber=1 scan=21809	47.0284
27476:3	1	S.M[+15.995]PLPPHPGHPGYINFS[+79.966]YEVLTPLK.W		M[+16], S[+80]	934.129	3	2800.37	2800.36	0	5.2	17	NRagged	1048.11	1048.11	61.56	17.79	1206	>sp|P02817|AMELX_BOVIN Amelogenin, X isoform OS=Bos taurus OX=9913 GN=AMELX PE=1 SV=2	1	hf1_10472_ebo_26_1_261219.ScanId;v=1;d1=20822.20822.3	controllerType=0 controllerNumber=1 scan=20822	45.3025
27750:3	1	S.M[+15.995]PLPPHPGHPGYINFS[+79.966]YEVLTPLK.W		M[+16], S[+80]	934.13	3	2800.38	2800.36	0	6.7	17	NRagged	1079.36	1079.36	70.2	18.84	1206	>sp|P02817|AMELX_BOVIN Amelogenin, X isoform OS=Bos taurus OX=9913 GN=AMELX PE=1 SV=2	1	hf1_10472_ebo_26_1_261219.ScanId;v=1;d1=21017.21017.3	controllerType=0 controllerNumber=1 scan=21017	45.6472
30470:3	1	S.MPLPPHPGHPGYIN[+0.984]FS[+79.966]YEVLTPLK.W		N[+1], S[+80]	929.128	3	2785.37	2785.35	0	8.8	17	NRagged	1088.88	1088.88	528.9	18.52	1206	>sp|P02817|AMELX_BOVIN Amelogenin, X isoform OS=Bos taurus OX=9913 GN=AMELX PE=1 SV=2	1	hf1_10472_ebo_26_1_261219.ScanId;v=1;d1=22888.22888.3	controllerType=0 controllerNumber=1 scan=22888	48.9132
28037:3	1	S.M[+15.995]PLPPHPGHPGYINFS[+79.966]YEVLTPLK.W		M[+16], S[+80]	934.13	3	2800.38	2800.36	0	6.7	17	NRagged	1089.18	1089.18	34.66	18.84	1206	>sp|P02817|AMELX_BOVIN Amelogenin, X isoform OS=Bos taurus OX=9913 GN=AMELX PE=1 SV=2	1	hf1_10472_ebo_26_1_261219.ScanId;v=1;d1=21215.21215.3	controllerType=0 controllerNumber=1 scan=21215	45.9917
46213:3	1	S.M[+15.995]PLPPHPGHPGYINFS[+79.966]YEVLTPLK.W		M[+16], S[+80]	934.13	3	2800.38	2800.36	0	6.9	17	NRagged	1099.12	1099.12	56.58	18.84	1206	>sp|P02817|AMELX_BOVIN Amelogenin, X isoform OS=Bos taurus OX=9913 GN=AMELX PE=1 SV=2	1	hf1_10472_ebo_26_1_261219.ScanId;v=1;d1=34365.34365.3	controllerType=0 controllerNumber=1 scan=34365	73.5795
30179:3	1	S.MPLPPHPGHPGYIN[+0.984]FS[+79.966]YEVLTPLK.W		N[+1], S[+80]	929.127	3	2785.37	2785.35	0	7.1	17	NRagged	1143.58	1143.58	534.47	19.84	1206	>sp|P02817|AMELX_BOVIN Amelogenin, X isoform OS=Bos taurus OX=9913 GN=AMELX PE=1 SV=2	1	hf1_10472_ebo_26_1_261219.ScanId;v=1;d1=22685.22685.3	controllerType=0 controllerNumber=1 scan=22685	48.5591
29910:3	1	S.MPLPPHPGHPGYIN[+0.984]FS[+79.966]YEVLTPLK.W		N[+1], S[+80]	929.126	3	2785.36	2785.35	0	6.7	17	NRagged	1148.49	1148.49	529.32	19.84	1206	>sp|P02817|AMELX_BOVIN Amelogenin, X isoform OS=Bos taurus OX=9913 GN=AMELX PE=1 SV=2	1	hf1_10472_ebo_26_1_261219.ScanId;v=1;d1=22491.22491.3	controllerType=0 controllerNumber=1 scan=22491	48.2176
45201:4	1	S.MPLP[+15.995]PHPGHPGY[+31.990]INF[+31.990]SYEVLTPLK.W		F[+32], P[+16], Y[+32]	696.848	4	2784.37	2784.37	0	0.8	17	NRagged	5.97	5.97	0	2.16	1206	>sp|P02817|AMELX_BOVIN Amelogenin, X isoform OS=Bos taurus OX=9913 GN=AMELX PE=1 SV=2	1	hf1_10472_ebo_26_1_261219.ScanId;v=1;d1=32969.32969.4	controllerType=0 controllerNumber=1 scan=32969	68.1803
46130:4	1	S.MPLP[+15.995]PHPGHPGY[+31.990]INF[+31.990]SYEVLTPLK.W		F[+32], P[+16], Y[+32]	696.85	4	2784.38	2784.37	0	2.2	17	NRagged	11.35	11.35	0	2.22	1206	>sp|P02817|AMELX_BOVIN Amelogenin, X isoform OS=Bos taurus OX=9913 GN=AMELX PE=1 SV=2	1	hf1_10472_ebo_26_1_261219.ScanId;v=1;d1=34303.34303.4	controllerType=0 controllerNumber=1 scan=34303	73.4682
39770:4	1	S.MPLP[+15.995]PHPGHP[+31.990]GYINF[+31.990]SYEVLTPLK.W		F[+32], P[+16][+32]	696.85	4	2784.38	2784.37	0	3.4	17	NRagged	14.88	14.88	0	2.23	1206	>sp|P02817|AMELX_BOVIN Amelogenin, X isoform OS=Bos taurus OX=9913 GN=AMELX PE=1 SV=2	1	hf1_10472_ebo_26_1_261219.ScanId;v=1;d1=29049.29049.4	controllerType=0 controllerNumber=1 scan=29049	59.8877
41101:4	1	S.MPLP[+15.995]PHPGHPGY[+31.990]INF[+31.990]SYEVLTPLK.W		F[+32], P[+16], Y[+32]	696.851	4	2784.38	2784.37	0	4.3	17	NRagged	18	18	0	2.37	1206	>sp|P02817|AMELX_BOVIN Amelogenin, X isoform OS=Bos taurus OX=9913 GN=AMELX PE=1 SV=2	1	hf1_10472_ebo_26_1_261219.ScanId;v=1;d1=29923.29923.4	controllerType=0 controllerNumber=1 scan=29923	61.4464
46122:4	1	S.MPLP[+15.995]PHPGHPGY[+31.990]INF[+31.990]SYEVLTPLK.W		F[+32], P[+16], Y[+32]	696.849	4	2784.38	2784.37	0	2	17	NRagged	19.54	19.54	0	2.16	1206	>sp|P02817|AMELX_BOVIN Amelogenin, X isoform OS=Bos taurus OX=9913 GN=AMELX PE=1 SV=2	1	hf1_10472_ebo_26_1_261219.ScanId;v=1;d1=34296.34296.3	controllerType=0 controllerNumber=1 scan=34296	73.4498
40776:4	1	S.MPLPPHPGHP[+31.990]GY[+31.990]INF[+15.995]SYEVLTPLK.W		F[+16], P[+32], Y[+32]	696.851	4	2784.38	2784.37	0	4.4	17	NRagged	56.75	56.75	0	2.62	1206	>sp|P02817|AMELX_BOVIN Amelogenin, X isoform OS=Bos taurus OX=9913 GN=AMELX PE=1 SV=2	1	hf1_10472_ebo_26_1_261219.ScanId;v=1;d1=29710.29710.4	controllerType=0 controllerNumber=1 scan=29710	61.0669
40323:4	1	S.MPLP[+15.995]PHPGHP[+31.990]GYINF[+31.990]SYEVLTPLK.W		F[+32], P[+16][+32]	696.85	4	2784.38	2784.37	0	3.4	17	NRagged	67.52	67.52	0	2.38	1206	>sp|P02817|AMELX_BOVIN Amelogenin, X isoform OS=Bos taurus OX=9913 GN=AMELX PE=1 SV=2	1	hf1_10472_ebo_26_1_261219.ScanId;v=1;d1=29408.29408.4	controllerType=0 controllerNumber=1 scan=29408	60.5279
46397:4	1	S.MPLP[+15.995]PHPGHPGY[+31.990]INF[+31.990]SYEVLTPLK.W		F[+32], P[+16], Y[+32]	696.851	4	2784.38	2784.37	0	3.7	17	NRagged	81.27	81.27	0	2.48	1206	>sp|P02817|AMELX_BOVIN Amelogenin, X isoform OS=Bos taurus OX=9913 GN=AMELX PE=1 SV=2	1	hf1_10472_ebo_26_1_261219.ScanId;v=1;d1=34553.34553.4	controllerType=0 controllerNumber=1 scan=34553	74.2558
45937:4	1	S.MPLP[+15.995]PHPGHPGY[+31.990]INF[+31.990]SYEVLTPLK.W		F[+32], P[+16], Y[+32]	696.848	4	2784.37	2784.37	0	0.5	17	NRagged	81.72	81.72	0	2.26	1206	>sp|P02817|AMELX_BOVIN Amelogenin, X isoform OS=Bos taurus OX=9913 GN=AMELX PE=1 SV=2	1	hf1_10472_ebo_26_1_261219.ScanId;v=1;d1=33982.33982.4	controllerType=0 controllerNumber=1 scan=33982	72.1035
27662:4	1	S.MP[+15.995]LPPHPGHPGYINFS[+79.966]Y[+31.990]EVLTPLK.W		P[+16], S[+80], Y[+32]	708.846	4	2832.36	2832.35	0	6.1	17	NRagged	103.05	103.05	5.8	2.47	1206	>sp|P02817|AMELX_BOVIN Amelogenin, X isoform OS=Bos taurus OX=9913 GN=AMELX PE=1 SV=2	1	hf1_10472_ebo_26_1_261219.ScanId;v=1;d1=20953.20953.4	controllerType=0 controllerNumber=1 scan=20953	45.5316
27621:4	1	S.MP[+15.995]LPPHP[+31.990]GHPGYINFS[+79.966]YEVLTPLK.W		P[+16][+32], S[+80]	708.846	4	2832.36	2832.35	0	5.4	17	NRagged	113.52	113.52	2.06	2.16	1206	>sp|P02817|AMELX_BOVIN Amelogenin, X isoform OS=Bos taurus OX=9913 GN=AMELX PE=1 SV=2	1	hf1_10472_ebo_26_1_261219.ScanId;v=1;d1=20926.20926.4	controllerType=0 controllerNumber=1 scan=20926	45.4826
42691:4	1	S.MPLP[+15.995]P[+31.990]HPGHPGYINF[+31.990]SYEVLTPLK.W		F[+32], P[+16][+32]	696.85	4	2784.38	2784.37	0	3.4	17	NRagged	113.69	113.69	0	2.48	1206	>sp|P02817|AMELX_BOVIN Amelogenin, X isoform OS=Bos taurus OX=9913 GN=AMELX PE=1 SV=2	1	hf1_10472_ebo_26_1_261219.ScanId;v=1;d1=30956.30956.3	controllerType=0 controllerNumber=1 scan=30956	63.3004
29016:4	1	S.MPLPPHPGHPGY[+31.990]IN[+0.984]F[+31.990]SYEVLTPLK.W		F[+32], N[+1], Y[+32]	693.093	4	2769.35	2769.36	0	-2.5	17	NRagged	114.36	114.36	0	2.16	1206	>sp|P02817|AMELX_BOVIN Amelogenin, X isoform OS=Bos taurus OX=9913 GN=AMELX PE=1 SV=2	1	hf1_10472_ebo_26_1_261219.ScanId;v=1;d1=21881.21881.4	controllerType=0 controllerNumber=1 scan=21881	47.1524
44316:4	1	S.MPLPPHPGHP[+15.995]GY[+31.990]INF[+31.990]SYEVLTPLK.W		F[+32], P[+16], Y[+32]	696.851	4	2784.38	2784.37	0	3.7	17	NRagged	133.02	133.02	0	2.81	1206	>sp|P02817|AMELX_BOVIN Amelogenin, X isoform OS=Bos taurus OX=9913 GN=AMELX PE=1 SV=2	1	hf1_10472_ebo_26_1_261219.ScanId;v=1;d1=32074.32074.4	controllerType=0 controllerNumber=1 scan=32074	65.3508
45806:4	1	S.MPLP[+15.995]PHPGHP[+31.990]GYINF[+31.990]SYEVLTPLK.W		F[+32], P[+16][+32]	696.85	4	2784.38	2784.37	0	2.8	17	NRagged	143.35	143.35	0	2.81	1206	>sp|P02817|AMELX_BOVIN Amelogenin, X isoform OS=Bos taurus OX=9913 GN=AMELX PE=1 SV=2	1	hf1_10472_ebo_26_1_261219.ScanId;v=1;d1=33864.33864.4	controllerType=0 controllerNumber=1 scan=33864	71.7659
29535:3	1	S.MPLPPHP[+15.995]GHPGY[+31.990]INF[+31.990]SYEVLTPLK.W		F[+32], P[+16], Y[+32]	928.799	3	2784.38	2784.37	0	4	17	NRagged	147.66	147.66	0	2.38	1206	>sp|P02817|AMELX_BOVIN Amelogenin, X isoform OS=Bos taurus OX=9913 GN=AMELX PE=1 SV=2	1	hf1_10472_ebo_26_1_261219.ScanId;v=1;d1=22230.22230.3	controllerType=0 controllerNumber=1 scan=22230	47.7626
43201:4	1	S.MPLPPHPGHP[+31.990]GYINF[+31.990]SY[+15.995]EVLTPLK.W		F[+32], P[+32], Y[+16]	696.851	4	2784.38	2784.37	0	3.9	17	NRagged	151.13	151.13	0	2.81	1206	>sp|P02817|AMELX_BOVIN Amelogenin, X isoform OS=Bos taurus OX=9913 GN=AMELX PE=1 SV=2	1	hf1_10472_ebo_26_1_261219.ScanId;v=1;d1=31281.31281.4	controllerType=0 controllerNumber=1 scan=31281	63.8832
44784:4	1	S.MPLP[+15.995]PHPGHPGY[+31.990]INF[+31.990]SYEVLTPLK.W		F[+32], P[+16], Y[+32]	696.851	4	2784.38	2784.37	0	3.7	17	NRagged	164.98	164.98	0	3.71	1206	>sp|P02817|AMELX_BOVIN Amelogenin, X isoform OS=Bos taurus OX=9913 GN=AMELX PE=1 SV=2	1	hf1_10472_ebo_26_1_261219.ScanId;v=1;d1=32466.32466.4	controllerType=0 controllerNumber=1 scan=32466	66.3844
44474:4	1	S.MPLPPHPGHPGY[+31.990]INF[+31.990]SY[+15.995]EVLTPLK.W		F[+32], Y[+16][+32]	696.849	4	2784.38	2784.37	0	1.9	17	NRagged	173.69	173.69	1.5	3.21	1206	>sp|P02817|AMELX_BOVIN Amelogenin, X isoform OS=Bos taurus OX=9913 GN=AMELX PE=1 SV=2	1	hf1_10472_ebo_26_1_261219.ScanId;v=1;d1=32200.32200.4	controllerType=0 controllerNumber=1 scan=32200	65.6973
43775:4	1	S.MPLPPHP[+15.995]GHPGY[+31.990]INF[+31.990]SYEVLTPLK.W		F[+32], P[+16], Y[+32]	696.851	4	2784.38	2784.37	0	5.1	17	NRagged	175.68	175.68	0	4.13	1206	>sp|P02817|AMELX_BOVIN Amelogenin, X isoform OS=Bos taurus OX=9913 GN=AMELX PE=1 SV=2	1	hf1_10472_ebo_26_1_261219.ScanId;v=1;d1=31677.31677.4	controllerType=0 controllerNumber=1 scan=31677	64.5869
35554:3	1	S.MPLPPHPGHPGY[+31.990]INF[+15.995]SY[+31.990]EVLTPLK.W		F[+16], Y[+32]*2	928.795	3	2784.37	2784.37	0	0.2	17	NRagged	195.7	195.7	3.12	2.67	1206	>sp|P02817|AMELX_BOVIN Amelogenin, X isoform OS=Bos taurus OX=9913 GN=AMELX PE=1 SV=2	1	hf1_10472_ebo_26_1_261219.ScanId;v=1;d1=26284.26284.3	controllerType=0 controllerNumber=1 scan=26284	54.9466
42550:4	1	S.MPLPPHPGHPGY[+31.990]INF[+31.990]SY[+15.995]EVLTPLK.W		F[+32], Y[+16][+32]	696.85	4	2784.38	2784.37	0	2.8	17	NRagged	214.26	214.26	1.5	3.99	1206	>sp|P02817|AMELX_BOVIN Amelogenin, X isoform OS=Bos taurus OX=9913 GN=AMELX PE=1 SV=2	1	hf1_10472_ebo_26_1_261219.ScanId;v=1;d1=30866.30866.4	controllerType=0 controllerNumber=1 scan=30866	63.1398
33186:4	1	S.MP[+15.995]LPPHPGHPGYINF[+31.990]SY[+31.990]EVLTPLK.W		F[+32], P[+16], Y[+32]	696.85	4	2784.38	2784.37	0	2.3	17	NRagged	233.29	233.29	5.8	3.7	1206	>sp|P02817|AMELX_BOVIN Amelogenin, X isoform OS=Bos taurus OX=9913 GN=AMELX PE=1 SV=2	1	hf1_10472_ebo_26_1_261219.ScanId;v=1;d1=24670.24670.6	controllerType=0 controllerNumber=1 scan=24670	52.0559
29280:5	1	S.MPLP[+15.995]PHPGHPGY[+31.990]INFSY[+31.990]EVLTPLK.W		P[+16], Y[+32]*2	557.682	5	2784.38	2784.37	0	3.5	17	NRagged	239.64	239.64	0	3.01	1206	>sp|P02817|AMELX_BOVIN Amelogenin, X isoform OS=Bos taurus OX=9913 GN=AMELX PE=1 SV=2	1	hf1_10472_ebo_26_1_261219.ScanId;v=1;d1=22063.22063.5	controllerType=0 controllerNumber=1 scan=22063	47.4707
27851:3	1	S.M[+31.990]PLPPHPGHPGYIN[+0.984]FS[+79.966]YEVLTPLK.W		M[+32], N[+1], S[+80]	939.791	3	2817.36	2817.34	0	8.2	17	NRagged	317.24	317.24	0	5.35	1206	>sp|P02817|AMELX_BOVIN Amelogenin, X isoform OS=Bos taurus OX=9913 GN=AMELX PE=1 SV=2	1	hf1_10472_ebo_26_1_261219.ScanId;v=1;d1=21086.21086.3	controllerType=0 controllerNumber=1 scan=21086	45.7656
28016:4	1	S.M[+15.995]PLP[+15.995]PHPGHPGYINFS[+79.966]YEVLTPLK.W		M[+16], P[+16], S[+80]	704.848	4	2816.37	2816.35	0	5.9	17	NRagged	393.86	393.86	11.82	6.98	1206	>sp|P02817|AMELX_BOVIN Amelogenin, X isoform OS=Bos taurus OX=9913 GN=AMELX PE=1 SV=2	1	hf1_10472_ebo_26_1_261219.ScanId;v=1;d1=21200.21200.4	controllerType=0 controllerNumber=1 scan=21200	45.9634
27720:4	1	S.M[+15.995]PLPPHPGH[+15.995]PGYINFS[+79.966]YEVLTPLK.W		H[+16], M[+16], S[+80]	704.844	4	2816.36	2816.35	0	1.4	17	NRagged	476.84	476.84	7.52	6.22	1206	>sp|P02817|AMELX_BOVIN Amelogenin, X isoform OS=Bos taurus OX=9913 GN=AMELX PE=1 SV=2	1	hf1_10472_ebo_26_1_261219.ScanId;v=1;d1=20996.20996.4	controllerType=0 controllerNumber=1 scan=20996	45.6102
29563:4	1	S.MPLPPHP[+15.995]GHPGYIN[+0.984]FS[+79.966]YEVLTPLK.W		N[+1], P[+16], S[+80]	701.096	4	2801.36	2801.34	0	7.8	17	NRagged	524.72	524.72	6.13	7.36	1206	>sp|P02817|AMELX_BOVIN Amelogenin, X isoform OS=Bos taurus OX=9913 GN=AMELX PE=1 SV=2	1	hf1_10472_ebo_26_1_261219.ScanId;v=1;d1=22250.22250.4	controllerType=0 controllerNumber=1 scan=22250	47.7982
28970:2	1	S.MPLPPHPGHP[+31.990]GY[+15.995]INF[+31.990]SYEVLTPLK.W		F[+32], P[+32], Y[+16]	1392.7	2	2784.39	2784.37	0	7.3	17	NRagged	527.73	527.73	12.03	6.15	1206	>sp|P02817|AMELX_BOVIN Amelogenin, X isoform OS=Bos taurus OX=9913 GN=AMELX PE=1 SV=2	1	hf1_10472_ebo_26_1_261219.ScanId;v=1;d1=21851.21851.2	controllerType=0 controllerNumber=1 scan=21851	47.1001
26878:4	1	S.MP[+15.995]LPPHPGHP[+15.995]GYINFS[+79.966]YEVLTPLK.W		P[+16]*2, S[+80]	704.848	4	2816.37	2816.35	0	6.3	17	NRagged	532.15	532.15	0.26	8.06	1206	>sp|P02817|AMELX_BOVIN Amelogenin, X isoform OS=Bos taurus OX=9913 GN=AMELX PE=1 SV=2	1	hf1_10472_ebo_26_1_261219.ScanId;v=1;d1=20404.20404.4	controllerType=0 controllerNumber=1 scan=20404	44.5727
27445:4	1	S.MP[+15.995]LPPHPGHP[+15.995]GYINFS[+79.966]YEVLTPLK.W		P[+16]*2, S[+80]	704.846	4	2816.36	2816.35	0	3.8	17	NRagged	563.51	563.51	1.46	8.4	1206	>sp|P02817|AMELX_BOVIN Amelogenin, X isoform OS=Bos taurus OX=9913 GN=AMELX PE=1 SV=2	1	hf1_10472_ebo_26_1_261219.ScanId;v=1;d1=20801.20801.4	controllerType=0 controllerNumber=1 scan=20801	45.2661
27850:3	1	S.M[+15.995]PLPPHPGHPGY[+15.995]INFS[+79.966]YEVLTPLK.W		M[+16], S[+80], Y[+16]	939.459	3	2816.36	2816.35	0	3.7	17	NRagged	634.39	634.39	10.7	9.37	1206	>sp|P02817|AMELX_BOVIN Amelogenin, X isoform OS=Bos taurus OX=9913 GN=AMELX PE=1 SV=2	1	hf1_10472_ebo_26_1_261219.ScanId;v=1;d1=21086.21086.3	controllerType=0 controllerNumber=1 scan=21086	45.7656
28446:2	1	S.M[+15.995]PLPPHPGHPGYIN[+0.984]FS[+79.966]YEVLTPLK.W		M[+16], N[+1], S[+80]	1401.19	2	2801.36	2801.34	0	8.1	17	NRagged	699.56	634.89	49.46	9.67	1206	>sp|P02817|AMELX_BOVIN Amelogenin, X isoform OS=Bos taurus OX=9913 GN=AMELX PE=1 SV=2	1	hf1_10472_ebo_26_1_261219.ScanId;v=1;d1=21493.21493.2	controllerType=0 controllerNumber=1 scan=21493	46.4769
27174:4	1	S.MP[+15.995]LPPHPGHP[+15.995]GYINFS[+79.966]YEVLTPLK.W		P[+16]*2, S[+80]	704.848	4	2816.37	2816.35	0	6.7	17	NRagged	711.77	711.77	3.8	11.87	1206	>sp|P02817|AMELX_BOVIN Amelogenin, X isoform OS=Bos taurus OX=9913 GN=AMELX PE=1 SV=2	1	hf1_10472_ebo_26_1_261219.ScanId;v=1;d1=20607.20607.4	controllerType=0 controllerNumber=1 scan=20607	44.9277
28396:4	1	S.MP[+15.995]LPPHPGHPGYIN[+0.984]FS[+79.966]YEVLTPLK.W		N[+1], P[+16], S[+80]	701.096	4	2801.36	2801.34	0	8.1	17	NRagged	727.13	694.39	1.85	11.56	1206	>sp|P02817|AMELX_BOVIN Amelogenin, X isoform OS=Bos taurus OX=9913 GN=AMELX PE=1 SV=2	1	hf1_10472_ebo_26_1_261219.ScanId;v=1;d1=21458.21458.4	controllerType=0 controllerNumber=1 scan=21458	46.4163
28543:3	1	S.M[+15.995]P[+15.995]LPPHPGHPGYINFS[+79.966]YEVLTPLK.W		M[+16], P[+16], S[+80]	939.461	3	2816.37	2816.35	0	5.7	17	NRagged	741.11	741.11	3.89	11.79	1206	>sp|P02817|AMELX_BOVIN Amelogenin, X isoform OS=Bos taurus OX=9913 GN=AMELX PE=1 SV=2	1	hf1_10472_ebo_26_1_261219.ScanId;v=1;d1=21558.21558.3	controllerType=0 controllerNumber=1 scan=21558	46.5911
29496:3	1	S.MPLPPHPGHP[+15.995]GYIN[+0.984]FS[+79.966]YEVLTPLK.W		N[+1], P[+16], S[+80]	934.46	3	2801.37	2801.34	0	8.8	17	NRagged	838.11	791.48	5.98	13.52	1206	>sp|P02817|AMELX_BOVIN Amelogenin, X isoform OS=Bos taurus OX=9913 GN=AMELX PE=1 SV=2	1	hf1_10472_ebo_26_1_261219.ScanId;v=1;d1=22205.22205.3	controllerType=0 controllerNumber=1 scan=22205	47.7197
27563:3	1	S.M[+15.995]PLPPHPGH[+15.995]PGYINFS[+79.966]YEVLTPLK.W		H[+16], M[+16], S[+80]	939.458	3	2816.36	2816.35	0	3.2	17	NRagged	889.75	889.75	11.9	14.37	1206	>sp|P02817|AMELX_BOVIN Amelogenin, X isoform OS=Bos taurus OX=9913 GN=AMELX PE=1 SV=2	1	hf1_10472_ebo_26_1_261219.ScanId;v=1;d1=20886.20886.3	controllerType=0 controllerNumber=1 scan=20886	45.4144
26993:3	1	S.M[+15.995]PLPPHPGHP[+15.995]GYINFS[+79.966]YEVLTPLK.W		M[+16], P[+16], S[+80]	939.462	3	2816.37	2816.35	0	6.4	17	NRagged	928.67	928.67	5.41	15.84	1206	>sp|P02817|AMELX_BOVIN Amelogenin, X isoform OS=Bos taurus OX=9913 GN=AMELX PE=1 SV=2	1	hf1_10472_ebo_26_1_261219.ScanId;v=1;d1=20481.20481.3	controllerType=0 controllerNumber=1 scan=20481	44.7049
27282:3	1	S.M[+15.995]PLPPHPGHP[+15.995]GYINFS[+79.966]YEVLTPLK.W		M[+16], P[+16], S[+80]	939.46	3	2816.36	2816.35	0	4.7	17	NRagged	929.04	929.04	6.73	15.79	1206	>sp|P02817|AMELX_BOVIN Amelogenin, X isoform OS=Bos taurus OX=9913 GN=AMELX PE=1 SV=2	1	hf1_10472_ebo_26_1_261219.ScanId;v=1;d1=20684.20684.3	controllerType=0 controllerNumber=1 scan=20684	45.0619
28626:3	1	S.M[+15.995]PLPPHPGHPGYIN[+0.984]FS[+79.966]YEVLTPLK.W		M[+16], N[+1], S[+80]	934.461	3	2801.37	2801.34	0	9.7	17	NRagged	991.24	987.54	21.32	16.52	1206	>sp|P02817|AMELX_BOVIN Amelogenin, X isoform OS=Bos taurus OX=9913 GN=AMELX PE=1 SV=2	1	hf1_10472_ebo_26_1_261219.ScanId;v=1;d1=21612.21612.3	controllerType=0 controllerNumber=1 scan=21612	46.6852
28328:3	1	S.M[+15.995]PLPPHPGHPGYIN[+0.984]FS[+79.966]YEVLTPLK.W		M[+16], N[+1], S[+80]	934.46	3	2801.36	2801.34	0	8.3	17	NRagged	1010.28	1009.84	53.02	17.52	1206	>sp|P02817|AMELX_BOVIN Amelogenin, X isoform OS=Bos taurus OX=9913 GN=AMELX PE=1 SV=2	1	hf1_10472_ebo_26_1_261219.ScanId;v=1;d1=21413.21413.3	controllerType=0 controllerNumber=1 scan=21413	46.338
44259:4	1	S.MP[+15.995]LP[+15.995]PHPGHP[+31.990]GYINF[+31.990]SYEVLTPLK.W		F[+32], P[+16]*2[+32]	700.849	4	2800.37	2800.37	0	3.3	17	NRagged	25.02	25.02	0	2.23	1206	>sp|P02817|AMELX_BOVIN Amelogenin, X isoform OS=Bos taurus OX=9913 GN=AMELX PE=1 SV=2	1	hf1_10472_ebo_26_1_261219.ScanId;v=1;d1=32025.32025.2	controllerType=0 controllerNumber=1 scan=32025	65.233
42837:4	1	S.MP[+15.995]LP[+15.995]PHPGHP[+31.990]GYINF[+31.990]SYEVLTPLK.W		F[+32], P[+16]*2[+32]	700.849	4	2800.38	2800.37	0	3.6	17	NRagged	50.86	50.86	0	2.38	1206	>sp|P02817|AMELX_BOVIN Amelogenin, X isoform OS=Bos taurus OX=9913 GN=AMELX PE=1 SV=2	1	hf1_10472_ebo_26_1_261219.ScanId;v=1;d1=31046.31046.4	controllerType=0 controllerNumber=1 scan=31046	63.4613
46399:4	1	S.MP[+15.995]LP[+15.995]PHPGHPGY[+31.990]INF[+31.990]SYEVLTPLK.W		F[+32], P[+16]*2, Y[+32]	700.85	4	2800.38	2800.37	0	4.6	17	NRagged	51.89	51.89	0	2.76	1206	>sp|P02817|AMELX_BOVIN Amelogenin, X isoform OS=Bos taurus OX=9913 GN=AMELX PE=1 SV=2	1	hf1_10472_ebo_26_1_261219.ScanId;v=1;d1=34554.34554.4	controllerType=0 controllerNumber=1 scan=34554	74.2573
43433:4	1	S.MP[+15.995]LPPHPGHP[+31.990]GYINF[+31.990]SY[+15.995]EVLTPLK.W		F[+32], P[+16][+32], Y[+16]	700.85	4	2800.38	2800.37	0	4	17	NRagged	68.23	68.23	0	2.54	1206	>sp|P02817|AMELX_BOVIN Amelogenin, X isoform OS=Bos taurus OX=9913 GN=AMELX PE=1 SV=2	1	hf1_10472_ebo_26_1_261219.ScanId;v=1;d1=31444.31444.4	controllerType=0 controllerNumber=1 scan=31444	64.168
40575:4	1	S.MP[+15.995]LP[+15.995]P[+31.990]HP[+31.990]GHPGYINFSYEVLTPLK.W		P[+16]*2[+32]*2	700.848	4	2800.37	2800.37	0	2.1	17	NRagged	78.64	78.64	0	2.26	1206	>sp|P02817|AMELX_BOVIN Amelogenin, X isoform OS=Bos taurus OX=9913 GN=AMELX PE=1 SV=2	1	hf1_10472_ebo_26_1_261219.ScanId;v=1;d1=29577.29577.4	controllerType=0 controllerNumber=1 scan=29577	60.8304
42201:3	1	S.MPLPPHPGHP[+31.990]GY[+31.990]IN[+0.984]F[+15.995]SYEVLTPLK.W		F[+16], N[+1], P[+32], Y[+32]	929.132	3	2785.38	2785.35	0	9.9	17	NRagged	94.39	94.39	0	2.33	1206	>sp|P02817|AMELX_BOVIN Amelogenin, X isoform OS=Bos taurus OX=9913 GN=AMELX PE=1 SV=2	1	hf1_10472_ebo_26_1_261219.ScanId;v=1;d1=30643.30643.3	controllerType=0 controllerNumber=1 scan=30643	62.7417
44305:4	1	S.MP[+15.995]LP[+15.995]PHPGHPGY[+31.990]INF[+31.990]SYEVLTPLK.W		F[+32], P[+16]*2, Y[+32]	700.849	4	2800.37	2800.37	0	3.4	17	NRagged	97.17	97.17	0	2.67	1206	>sp|P02817|AMELX_BOVIN Amelogenin, X isoform OS=Bos taurus OX=9913 GN=AMELX PE=1 SV=2	1	hf1_10472_ebo_26_1_261219.ScanId;v=1;d1=32066.32066.4	controllerType=0 controllerNumber=1 scan=32066	65.3352
43715:4	1	S.MP[+15.995]LP[+31.990]PHPGHP[+31.990]GYINF[+15.995]SYEVLTPLK.W		F[+16], P[+16][+32]*2	700.85	4	2800.38	2800.37	0	4.7	17	NRagged	101.81	101.81	0	3.01	1206	>sp|P02817|AMELX_BOVIN Amelogenin, X isoform OS=Bos taurus OX=9913 GN=AMELX PE=1 SV=2	1	hf1_10472_ebo_26_1_261219.ScanId;v=1;d1=31637.31637.4	controllerType=0 controllerNumber=1 scan=31637	64.5142
45039:4	1	S.MPLPPHPGHP[+31.990]GY[+31.990]IN[+0.984]F[+15.995]SYEVLTPLK.W		F[+16], N[+1], P[+32], Y[+32]	697.098	4	2785.37	2785.35	0	5.8	17	NRagged	106.3	106.3	0	2.92	1206	>sp|P02817|AMELX_BOVIN Amelogenin, X isoform OS=Bos taurus OX=9913 GN=AMELX PE=1 SV=2	1	hf1_10472_ebo_26_1_261219.ScanId;v=1;d1=32762.32762.4	controllerType=0 controllerNumber=1 scan=32762	67.4117
44461:4	1	S.MP[+15.995]LP[+15.995]PHPGHP[+31.990]GYINF[+31.990]SYEVLTPLK.W		F[+32], P[+16]*2[+32]	700.85	4	2800.38	2800.37	0	4.4	17	NRagged	112.51	112.51	0	3.01	1206	>sp|P02817|AMELX_BOVIN Amelogenin, X isoform OS=Bos taurus OX=9913 GN=AMELX PE=1 SV=2	1	hf1_10472_ebo_26_1_261219.ScanId;v=1;d1=32191.32191.4	controllerType=0 controllerNumber=1 scan=32191	65.6792
41031:4	1	S.MP[+15.995]LPPHPGHP[+31.990]GYINF[+31.990]SY[+15.995]EVLTPLK.W		F[+32], P[+16][+32], Y[+16]	700.849	4	2800.38	2800.37	0	3.6	17	NRagged	121.24	121.24	0	2.89	1206	>sp|P02817|AMELX_BOVIN Amelogenin, X isoform OS=Bos taurus OX=9913 GN=AMELX PE=1 SV=2	1	hf1_10472_ebo_26_1_261219.ScanId;v=1;d1=29879.29879.4	controllerType=0 controllerNumber=1 scan=29879	61.3679
44678:3	1	S.MPLPPHPGHPGY[+31.990]IN[+0.984]F[+31.990]SY[+15.995]EVLTPLK.W		F[+32], N[+1], Y[+16][+32]	929.128	3	2785.37	2785.35	0	5.3	17	NRagged	130.61	130.61	0	3.15	1206	>sp|P02817|AMELX_BOVIN Amelogenin, X isoform OS=Bos taurus OX=9913 GN=AMELX PE=1 SV=2	1	hf1_10472_ebo_26_1_261219.ScanId;v=1;d1=32352.32352.3	controllerType=0 controllerNumber=1 scan=32352	66.0365
37046:3	1	S.MPLPPHPGHP[+31.990]GY[+31.990]IN[+0.984]F[+15.995]SYEVLTPLK.W		F[+16], N[+1], P[+32], Y[+32]	929.132	3	2785.38	2785.35	0	9.4	17	NRagged	193.7	193.7	0	3.54	1206	>sp|P02817|AMELX_BOVIN Amelogenin, X isoform OS=Bos taurus OX=9913 GN=AMELX PE=1 SV=2	1	hf1_10472_ebo_26_1_261219.ScanId;v=1;d1=27270.27270.3	controllerType=0 controllerNumber=1 scan=27270	56.7134
46323:4	1	S.MPLPPHPGHPGY[+31.990]IN[+0.984]F[+31.990]SY[+15.995]EVLTPLK.W		F[+32], N[+1], Y[+16][+32]	697.101	4	2785.38	2785.35	0	9.4	17	NRagged	203.78	203.78	1.5	4.14	1206	>sp|P02817|AMELX_BOVIN Amelogenin, X isoform OS=Bos taurus OX=9913 GN=AMELX PE=1 SV=2	1	hf1_10472_ebo_26_1_261219.ScanId;v=1;d1=34471.34471.4	controllerType=0 controllerNumber=1 scan=34471	73.9173
27550:5	1	S.MP[+15.995]LPPHPGHP[+31.990]GY[+31.990]INF[+15.995]SYEVLTPLK.W		F[+16], P[+16][+32], Y[+32]	560.881	5	2800.37	2800.37	0	3.1	17	NRagged	235.86	235.86	0	3.1	1206	>sp|P02817|AMELX_BOVIN Amelogenin, X isoform OS=Bos taurus OX=9913 GN=AMELX PE=1 SV=2	1	hf1_10472_ebo_26_1_261219.ScanId;v=1;d1=20876.20876.5	controllerType=0 controllerNumber=1 scan=20876	45.3975
25696:3	1	S.MP[+15.995]LPPHPGHP[+31.990]GY[+31.990]INFSY[+15.995]EVLTPLK.W		P[+16][+32], Y[+16][+32]	934.134	3	2800.39	2800.37	0	7.7	17	NRagged	309.7	309.7	5.8	5.47	1206	>sp|P02817|AMELX_BOVIN Amelogenin, X isoform OS=Bos taurus OX=9913 GN=AMELX PE=1 SV=2	1	hf1_10472_ebo_26_1_261219.ScanId;v=1;d1=19607.19607.3	controllerType=0 controllerNumber=1 scan=19607	43.1974
29856:2	1	S.MPLPPHPGHP[+31.990]GY[+15.995]IN[+0.984]F[+31.990]SYEVLTPLK.W		F[+32], N[+1], P[+32], Y[+16]	1393.19	2	2785.37	2785.35	0	7.3	17	NRagged	467.19	467.19	0	5.91	1206	>sp|P02817|AMELX_BOVIN Amelogenin, X isoform OS=Bos taurus OX=9913 GN=AMELX PE=1 SV=2	1	hf1_10472_ebo_26_1_261219.ScanId;v=1;d1=22453.22453.2	controllerType=0 controllerNumber=1 scan=22453	48.1498
35086:4	1	S.MPLPPHPGHPGYINFS[+79.966]YEVLTPLKW.Y		S[+80]	743.371	4	2970.46	2970.44	0	6.7	17	Non	229.29	229.29	35.12	4.26	1206	>sp|P02817|AMELX_BOVIN Amelogenin, X isoform OS=Bos taurus OX=9913 GN=AMELX PE=1 SV=2	1	hf1_10472_ebo_26_1_261219.ScanId;v=1;d1=25971.25971.4	controllerType=0 controllerNumber=1 scan=25971	54.393
34250:4	1	S.MPLPPHPGHPGYINFS[+79.966]YEVLTPLKW.Y		S[+80]	743.37	4	2970.46	2970.44	0	5	17	Non	273.5	273.5	61.31	5.25	1206	>sp|P02817|AMELX_BOVIN Amelogenin, X isoform OS=Bos taurus OX=9913 GN=AMELX PE=1 SV=2	1	hf1_10472_ebo_26_1_261219.ScanId;v=1;d1=25394.25394.4	controllerType=0 controllerNumber=1 scan=25394	53.3448
31455:4	1	S.MP[+15.995]LPPHPGHPGYINFSYEVLTPLKW.Y		P[+16]	727.377	4	2906.49	2906.47	0	5.9	17	Non	291.05	291.05	5.8	5.66	1206	>sp|P02817|AMELX_BOVIN Amelogenin, X isoform OS=Bos taurus OX=9913 GN=AMELX PE=1 SV=2	1	hf1_10472_ebo_26_1_261219.ScanId;v=1;d1=23537.23537.4	controllerType=0 controllerNumber=1 scan=23537	50.0569
31554:4	1	S.MP[+15.995]LPPHPGHPGYINFSYEVLTPLKW.Y		P[+16]	727.375	4	2906.48	2906.47	0	2.3	17	Non	321.54	321.54	5.8	5.33	1206	>sp|P02817|AMELX_BOVIN Amelogenin, X isoform OS=Bos taurus OX=9913 GN=AMELX PE=1 SV=2	1	hf1_10472_ebo_26_1_261219.ScanId;v=1;d1=23600.23600.4	controllerType=0 controllerNumber=1 scan=23600	50.1674
34531:4	1	S.MPLPPHPGHPGYINFS[+79.966]YEVLTPLKW.Y		S[+80]	743.37	4	2970.46	2970.44	0	6.4	17	Non	503.4	503.4	229.77	7.86	1206	>sp|P02817|AMELX_BOVIN Amelogenin, X isoform OS=Bos taurus OX=9913 GN=AMELX PE=1 SV=2	1	hf1_10472_ebo_26_1_261219.ScanId;v=1;d1=25591.25591.4	controllerType=0 controllerNumber=1 scan=25591	53.7007
34806:4	1	S.MPLPPHPGHPGYINFS[+79.966]YEVLTPLKW.Y		S[+80]	743.371	4	2970.46	2970.44	0	6.5	17	Non	520.02	520.02	232.01	7.26	1206	>sp|P02817|AMELX_BOVIN Amelogenin, X isoform OS=Bos taurus OX=9913 GN=AMELX PE=1 SV=2	1	hf1_10472_ebo_26_1_261219.ScanId;v=1;d1=25783.25783.4	controllerType=0 controllerNumber=1 scan=25783	54.0484
46202:3	1	S.MPLPPHPGHPGYINFS[+79.966]YEVLTPLKW.Y		S[+80]	990.826	3	2970.46	2970.44	0	7.1	17	Non	579.58	579.58	222.34	8.74	1206	>sp|P02817|AMELX_BOVIN Amelogenin, X isoform OS=Bos taurus OX=9913 GN=AMELX PE=1 SV=2	1	hf1_10472_ebo_26_1_261219.ScanId;v=1;d1=34357.34357.3	controllerType=0 controllerNumber=1 scan=34357	73.5647
34241:3	1	S.MPLPPHPGHPGYINFS[+79.966]YEVLTPLKW.Y		S[+80]	990.824	3	2970.46	2970.44	0	5.1	17	Non	755.08	755.08	345.97	12.7	1206	>sp|P02817|AMELX_BOVIN Amelogenin, X isoform OS=Bos taurus OX=9913 GN=AMELX PE=1 SV=2	1	hf1_10472_ebo_26_1_261219.ScanId;v=1;d1=25389.25389.3	controllerType=0 controllerNumber=1 scan=25389	53.3373
35069:3	1	S.MPLPPHPGHPGYINFS[+79.966]YEVLTPLKW.Y		S[+80]	990.822	3	2970.45	2970.44	0	4	17	Non	851.38	851.38	442.43	14.27	1206	>sp|P02817|AMELX_BOVIN Amelogenin, X isoform OS=Bos taurus OX=9913 GN=AMELX PE=1 SV=2	1	hf1_10472_ebo_26_1_261219.ScanId;v=1;d1=25959.25959.3	controllerType=0 controllerNumber=1 scan=25959	54.372
34795:3	1	S.MPLPPHPGHPGYINFS[+79.966]YEVLTPLKW.Y		S[+80]	990.825	3	2970.46	2970.44	0	6.7	17	Non	984.06	984.06	492.07	16.74	1206	>sp|P02817|AMELX_BOVIN Amelogenin, X isoform OS=Bos taurus OX=9913 GN=AMELX PE=1 SV=2	1	hf1_10472_ebo_26_1_261219.ScanId;v=1;d1=25774.25774.3	controllerType=0 controllerNumber=1 scan=25774	54.0321
34515:3	1	S.MPLPPHPGHPGYINFS[+79.966]YEVLTPLKW.Y		S[+80]	990.825	3	2970.46	2970.44	0	6.2	17	Non	1002.49	1002.49	494.2	17.74	1206	>sp|P02817|AMELX_BOVIN Amelogenin, X isoform OS=Bos taurus OX=9913 GN=AMELX PE=1 SV=2	1	hf1_10472_ebo_26_1_261219.ScanId;v=1;d1=25580.25580.3	controllerType=0 controllerNumber=1 scan=25580	53.6814
32684:4	1	S.MPLPPHPGHPGYINFS[+79.966]YEVLTPLKW[+31.990].Y		S[+80], W[+32]	751.368	4	3002.45	3002.43	0	6.7	17	Non	86.65	86.65	6.46	2.16	1206	>sp|P02817|AMELX_BOVIN Amelogenin, X isoform OS=Bos taurus OX=9913 GN=AMELX PE=1 SV=2	1	hf1_10472_ebo_26_1_261219.ScanId;v=1;d1=24330.24330.4	controllerType=0 controllerNumber=1 scan=24330	51.4518
35887:3	1	S.MPLPPHPGHPGYIN[+0.984]FS[+79.966]YEVLTPLKW.Y		N[+1], S[+80]	991.156	3	2971.45	2971.43	0	9.7	17	Non	165.16	165.16	59.92	3.04	1206	>sp|P02817|AMELX_BOVIN Amelogenin, X isoform OS=Bos taurus OX=9913 GN=AMELX PE=1 SV=2	1	hf1_10472_ebo_26_1_261219.ScanId;v=1;d1=26503.26503.3	controllerType=0 controllerNumber=1 scan=26503	55.3384
34324:3	1	S.M[+15.995]PLPPHPGHPGYINFS[+79.966]YEVLTPLKW.Y		M[+16], S[+80]	996.156	3	2986.45	2986.44	0	6	17	Non	168.16	3.52	3.52	1.61	1206	>sp|P02817|AMELX_BOVIN Amelogenin, X isoform OS=Bos taurus OX=9913 GN=AMELX PE=1 SV=2	1	hf1_10472_ebo_26_1_261219.ScanId;v=1;d1=25444.25444.3	controllerType=0 controllerNumber=1 scan=25444	53.433
35377:4	1	S.MPLPPHPGHPGYIN[+0.984]FS[+79.966]YEVLTPLKW.Y		N[+1], S[+80]	743.618	4	2971.45	2971.43	0	7.8	17	Non	249.45	249.45	59.32	5.1	1206	>sp|P02817|AMELX_BOVIN Amelogenin, X isoform OS=Bos taurus OX=9913 GN=AMELX PE=1 SV=2	1	hf1_10472_ebo_26_1_261219.ScanId;v=1;d1=26165.26165.4	controllerType=0 controllerNumber=1 scan=26165	54.7367
32646:3	1	S.MPLPPHPGHPGYINFS[+79.966]YEVLTPLKW[+31.990].Y		S[+80], W[+32]	1001.49	3	3002.45	3002.43	0	5.9	17	Non	327.13	327.13	5.62	5.62	1206	>sp|P02817|AMELX_BOVIN Amelogenin, X isoform OS=Bos taurus OX=9913 GN=AMELX PE=1 SV=2	1	hf1_10472_ebo_26_1_261219.ScanId;v=1;d1=24306.24306.3	controllerType=0 controllerNumber=1 scan=24306	51.4103
33474:4	1	S.MP[+15.995]LPPHPGHPGYINFS[+79.966]YEVLTPLKW.Y		P[+16], S[+80]	747.368	4	2986.45	2986.44	0	4.4	17	Non	342.95	342.95	17.29	5.65	1206	>sp|P02817|AMELX_BOVIN Amelogenin, X isoform OS=Bos taurus OX=9913 GN=AMELX PE=1 SV=2	1	hf1_10472_ebo_26_1_261219.ScanId;v=1;d1=24865.24865.4	controllerType=0 controllerNumber=1 scan=24865	52.4001
34047:4	1	S.MP[+15.995]LPPHPGHPGYINFS[+79.966]YEVLTPLKW.Y		P[+16], S[+80]	747.366	4	2986.44	2986.44	0	2.6	17	Non	351.78	351.78	17.24	5.23	1206	>sp|P02817|AMELX_BOVIN Amelogenin, X isoform OS=Bos taurus OX=9913 GN=AMELX PE=1 SV=2	1	hf1_10472_ebo_26_1_261219.ScanId;v=1;d1=25255.25255.4	controllerType=0 controllerNumber=1 scan=25255	53.0935
32849:3	1	S.MPLPPHPGHPGYINFS[+79.966]YEVLTPLKW[+31.990].Y		S[+80], W[+32]	1001.49	3	3002.45	3002.43	0	6.2	17	Non	362.05	362.05	6.82	6.59	1206	>sp|P02817|AMELX_BOVIN Amelogenin, X isoform OS=Bos taurus OX=9913 GN=AMELX PE=1 SV=2	1	hf1_10472_ebo_26_1_261219.ScanId;v=1;d1=24442.24442.3	controllerType=0 controllerNumber=1 scan=24442	51.6493
33553:3	1	S.M[+15.995]PLPPHPGHPGYINFS[+79.966]YEVLTPLKW.Y		M[+16], S[+80]	996.156	3	2986.45	2986.44	0	5.7	17	Non	402.55	402.55	15.5	6.66	1206	>sp|P02817|AMELX_BOVIN Amelogenin, X isoform OS=Bos taurus OX=9913 GN=AMELX PE=1 SV=2	1	hf1_10472_ebo_26_1_261219.ScanId;v=1;d1=24916.24916.3	controllerType=0 controllerNumber=1 scan=24916	52.4936
33183:4	1	S.MP[+15.995]LPPHPGHPGYINFS[+79.966]YEVLTPLKW.Y		P[+16], S[+80]	747.369	4	2986.45	2986.44	0	6	17	Non	469.66	469.66	12.67	7.08	1206	>sp|P02817|AMELX_BOVIN Amelogenin, X isoform OS=Bos taurus OX=9913 GN=AMELX PE=1 SV=2	1	hf1_10472_ebo_26_1_261219.ScanId;v=1;d1=24668.24668.4	controllerType=0 controllerNumber=1 scan=24668	52.0529
34207:3	1	S.M[+15.995]PLPPHPGHPGYINFS[+79.966]YEVLTPLKW.Y		M[+16], S[+80]	996.155	3	2986.45	2986.44	0	4.6	17	Non	488.02	488.02	3.07	6.97	1206	>sp|P02817|AMELX_BOVIN Amelogenin, X isoform OS=Bos taurus OX=9913 GN=AMELX PE=1 SV=2	1	hf1_10472_ebo_26_1_261219.ScanId;v=1;d1=25367.25367.3	controllerType=0 controllerNumber=1 scan=25367	53.2963
33647:3	1	S.M[+15.995]PLPPHPGHPGYINFS[+79.966]YEVLTPLKW.Y		M[+16], S[+80]	996.157	3	2986.46	2986.44	0	6.6	17	Non	528.33	528.33	1.47	7.12	1206	>sp|P02817|AMELX_BOVIN Amelogenin, X isoform OS=Bos taurus OX=9913 GN=AMELX PE=1 SV=2	1	hf1_10472_ebo_26_1_261219.ScanId;v=1;d1=24979.24979.3	controllerType=0 controllerNumber=1 scan=24979	52.6043
35636:3	1	S.MPLPPHPGHPGYIN[+0.984]FS[+79.966]YEVLTPLKW.Y		N[+1], S[+80]	991.151	3	2971.44	2971.43	0	4.2	17	Non	558.41	558.41	249.49	7.19	1206	>sp|P02817|AMELX_BOVIN Amelogenin, X isoform OS=Bos taurus OX=9913 GN=AMELX PE=1 SV=2	1	hf1_10472_ebo_26_1_261219.ScanId;v=1;d1=26342.26342.3	controllerType=0 controllerNumber=1 scan=26342	55.0535
33930:3	1	S.M[+15.995]PLPPHPGHPGYINFS[+79.966]YEVLTPLKW.Y		M[+16], S[+80]	996.152	3	2986.44	2986.44	0	2.1	17	Non	698.46	698.46	20.18	9.74	1206	>sp|P02817|AMELX_BOVIN Amelogenin, X isoform OS=Bos taurus OX=9913 GN=AMELX PE=1 SV=2	1	hf1_10472_ebo_26_1_261219.ScanId;v=1;d1=25175.25175.3	controllerType=0 controllerNumber=1 scan=25175	52.9516
33355:3	1	S.M[+15.995]PLPPHPGHPGYINFS[+79.966]YEVLTPLKW.Y		M[+16], S[+80]	996.156	3	2986.45	2986.44	0	5.9	17	Non	846.67	846.67	31.03	13.7	1206	>sp|P02817|AMELX_BOVIN Amelogenin, X isoform OS=Bos taurus OX=9913 GN=AMELX PE=1 SV=2	1	hf1_10472_ebo_26_1_261219.ScanId;v=1;d1=24783.24783.3	controllerType=0 controllerNumber=1 scan=24783	52.2541
33057:3	1	S.M[+15.995]PLPPHPGHPGYINFS[+79.966]YEVLTPLKW.Y		M[+16], S[+80]	996.156	3	2986.45	2986.44	0	5.6	17	Non	913.88	913.88	23.97	15.7	1206	>sp|P02817|AMELX_BOVIN Amelogenin, X isoform OS=Bos taurus OX=9913 GN=AMELX PE=1 SV=2	1	hf1_10472_ebo_26_1_261219.ScanId;v=1;d1=24586.24586.3	controllerType=0 controllerNumber=1 scan=24586	51.9021
35357:3	1	S.MPLPPHPGHPGYIN[+0.984]FS[+79.966]YEVLTPLKW.Y		N[+1], S[+80]	991.154	3	2971.45	2971.43	0	7.2	17	Non	939.32	939.32	505.37	15.74	1206	>sp|P02817|AMELX_BOVIN Amelogenin, X isoform OS=Bos taurus OX=9913 GN=AMELX PE=1 SV=2	1	hf1_10472_ebo_26_1_261219.ScanId;v=1;d1=26152.26152.3	controllerType=0 controllerNumber=1 scan=26152	54.7142
29113:4	1	S.MPLPP[+15.995]HPGHPGYINFS[+79.966]YEVLTPLKW[+15.995].Y		P[+16], S[+80], W[+16]	751.367	4	3002.45	3002.43	0	4.7	17	Non	90.74	90.74	0	2.16	1206	>sp|P02817|AMELX_BOVIN Amelogenin, X isoform OS=Bos taurus OX=9913 GN=AMELX PE=1 SV=2	1	hf1_10472_ebo_26_1_261219.ScanId;v=1;d1=21949.21949.4	controllerType=0 controllerNumber=1 scan=21949	47.2696
31059:3	1	S.MP[+15.995]LPPHPGHPGYINFS[+79.966]YEVLTPLKW[+15.995].Y		P[+16], S[+80], W[+16]	1001.49	3	3002.44	3002.43	0	3.7	17	Non	102.29	102.29	5.8	2.25	1206	>sp|P02817|AMELX_BOVIN Amelogenin, X isoform OS=Bos taurus OX=9913 GN=AMELX PE=1 SV=2	1	hf1_10472_ebo_26_1_261219.ScanId;v=1;d1=23280.23280.3	controllerType=0 controllerNumber=1 scan=23280	49.6058
46217:4	1	S.MPLPPHPGHP[+15.995]GY[+31.990]INF[+31.990]SYEVLTPLKW.Y		F[+32], P[+16], Y[+32]	743.371	4	2970.46	2970.45	0	4.5	17	Non	106.96	106.96	0	2.42	1206	>sp|P02817|AMELX_BOVIN Amelogenin, X isoform OS=Bos taurus OX=9913 GN=AMELX PE=1 SV=2	1	hf1_10472_ebo_26_1_261219.ScanId;v=1;d1=34367.34367.4	controllerType=0 controllerNumber=1 scan=34367	73.5825
29504:4	1	S.MPLPPHPGHPGYINF[+15.995]S[+79.966]YEVLTPLKW[+31.990].Y		F[+16], S[+80], W[+32]	755.366	4	3018.44	3018.43	0	5.7	17	Non	107.76	80.92	7.83	2.16	1206	>sp|P02817|AMELX_BOVIN Amelogenin, X isoform OS=Bos taurus OX=9913 GN=AMELX PE=1 SV=2	1	hf1_10472_ebo_26_1_261219.ScanId;v=1;d1=22210.22210.4	controllerType=0 controllerNumber=1 scan=22210	47.7272
31300:4	1	S.MP[+15.995]LPPHPGHPGYINFS[+79.966]YEVLTPLKW[+31.990].Y		P[+16], S[+80], W[+32]	755.367	4	3018.45	3018.43	0	6.6	17	Non	156.11	120.44	5.8	2.61	1206	>sp|P02817|AMELX_BOVIN Amelogenin, X isoform OS=Bos taurus OX=9913 GN=AMELX PE=1 SV=2	1	hf1_10472_ebo_26_1_261219.ScanId;v=1;d1=23438.23438.4	controllerType=0 controllerNumber=1 scan=23438	49.8829
31499:3	1	S.MP[+15.995]LPPHPGHPGYINFS[+79.966]YEVLTPLKW[+15.995].Y		P[+16], S[+80], W[+16]	1001.49	3	3002.46	3002.43	0	8	17	Non	168.38	168.38	1.28	3.75	1206	>sp|P02817|AMELX_BOVIN Amelogenin, X isoform OS=Bos taurus OX=9913 GN=AMELX PE=1 SV=2	1	hf1_10472_ebo_26_1_261219.ScanId;v=1;d1=23564.23564.3	controllerType=0 controllerNumber=1 scan=23564	50.1053
31802:3	1	S.M[+15.995]PLPPHPGHPGYINFS[+79.966]YEVLTPLKW[+15.995].Y		M[+16], S[+80], W[+16]	1001.49	3	3002.45	3002.43	0	4.8	17	Non	189.4	76.94	9.35	2.54	1206	>sp|P02817|AMELX_BOVIN Amelogenin, X isoform OS=Bos taurus OX=9913 GN=AMELX PE=1 SV=2	1	hf1_10472_ebo_26_1_261219.ScanId;v=1;d1=23764.23764.3	controllerType=0 controllerNumber=1 scan=23764	50.4573
29373:3	1	S.MP[+15.995]LPPHPGHPGYINFS[+79.966]YEVLTPLKW[+31.990].Y		P[+16], S[+80], W[+32]	1006.82	3	3018.44	3018.43	0	5.5	17	Non	284.65	53.7	5.8	3.57	1206	>sp|P02817|AMELX_BOVIN Amelogenin, X isoform OS=Bos taurus OX=9913 GN=AMELX PE=1 SV=2	1	hf1_10472_ebo_26_1_261219.ScanId;v=1;d1=22124.22124.3	controllerType=0 controllerNumber=1 scan=22124	47.5761
31303:3	1	S.MP[+15.995]LPPHPGHPGYINFS[+79.966]YEVLTPLKW[+31.990].Y		P[+16], S[+80], W[+32]	1006.82	3	3018.45	3018.43	0	7	17	Non	372.2	372.2	4	6.89	1206	>sp|P02817|AMELX_BOVIN Amelogenin, X isoform OS=Bos taurus OX=9913 GN=AMELX PE=1 SV=2	1	hf1_10472_ebo_26_1_261219.ScanId;v=1;d1=23440.23440.3	controllerType=0 controllerNumber=1 scan=23440	49.886
33931:3	1	S.M[+15.995]PLPPHPGHPGYIN[+0.984]FS[+79.966]YEVLTPLKW.Y		M[+16], N[+1], S[+80]	996.486	3	2987.44	2987.42	0	7.5	17	Non	748.27	544.6	17.59	11.74	1206	>sp|P02817|AMELX_BOVIN Amelogenin, X isoform OS=Bos taurus OX=9913 GN=AMELX PE=1 SV=2	1	hf1_10472_ebo_26_1_261219.ScanId;v=1;d1=25175.25175.3	controllerType=0 controllerNumber=1 scan=25175	52.9516
30652:4	1	S.MPLPPHPGHP[+15.995]GYINF[+31.990]SY[+31.990]EVLTPLKW[+15.995].Y		F[+32], P[+16], W[+16], Y[+32]	747.369	4	2986.46	2986.44	0	3.8	17	Non	117.31	117.31	0	2.26	1206	>sp|P02817|AMELX_BOVIN Amelogenin, X isoform OS=Bos taurus OX=9913 GN=AMELX PE=1 SV=2	1	hf1_10472_ebo_26_1_261219.ScanId;v=1;d1=23007.23007.4	controllerType=0 controllerNumber=1 scan=23007	49.124
35790:4	1	S.MPLPPHPGHP[+31.990]GYIN[+0.984]F[+31.990]SY[+15.995]EVLTPLKW.Y		F[+32], N[+1], P[+32], Y[+16]	743.616	4	2971.44	2971.43	0	3.2	17	Non	119.3	119.3	0	2.26	1206	>sp|P02817|AMELX_BOVIN Amelogenin, X isoform OS=Bos taurus OX=9913 GN=AMELX PE=1 SV=2	1	hf1_10472_ebo_26_1_261219.ScanId;v=1;d1=26440.26440.4	controllerType=0 controllerNumber=1 scan=26440	55.2262
33768:4	1	S.MP[+15.995]LPPHPGHP[+31.990]GY[+15.995]INF[+31.990]SYEVLTPLKW.Y		F[+32], P[+16][+32], Y[+16]	747.367	4	2986.44	2986.44	0	0.1	17	Non	140.71	140.71	0	2.23	1206	>sp|P02817|AMELX_BOVIN Amelogenin, X isoform OS=Bos taurus OX=9913 GN=AMELX PE=1 SV=2	1	hf1_10472_ebo_26_1_261219.ScanId;v=1;d1=25062.25062.4	controllerType=0 controllerNumber=1 scan=25062	52.7515
32897:4	1	S.MPLPPHPGHP[+15.995]GYINF[+31.990]SY[+31.990]EVLTPLKW[+15.995].Y		F[+32], P[+16], W[+16], Y[+32]	747.368	4	2986.45	2986.44	0	2.2	17	Non	140.95	140.95	0	2.36	1206	>sp|P02817|AMELX_BOVIN Amelogenin, X isoform OS=Bos taurus OX=9913 GN=AMELX PE=1 SV=2	1	hf1_10472_ebo_26_1_261219.ScanId;v=1;d1=24475.24475.4	controllerType=0 controllerNumber=1 scan=24475	51.707
46241:4	1	S.MP[+15.995]LPPHPGHPGY[+31.990]INF[+31.990]SY[+15.995]EVLTPLKW.Y		F[+32], P[+16], Y[+16][+32]	747.371	4	2986.46	2986.44	0	5.9	17	Non	166.72	166.72	0	3.74	1206	>sp|P02817|AMELX_BOVIN Amelogenin, X isoform OS=Bos taurus OX=9913 GN=AMELX PE=1 SV=2	1	hf1_10472_ebo_26_1_261219.ScanId;v=1;d1=34386.34386.4	controllerType=0 controllerNumber=1 scan=34386	73.6169
46239:3	1	S.MP[+15.995]LPPHPGHP[+15.995]GY[+31.990]INF[+31.990]SYEVLTPLKW.Y		F[+32], P[+16]*2, Y[+32]	996.161	3	2986.47	2986.44	0	7.8	17	Non	262.57	262.57	0	5.36	1206	>sp|P02817|AMELX_BOVIN Amelogenin, X isoform OS=Bos taurus OX=9913 GN=AMELX PE=1 SV=2	1	hf1_10472_ebo_26_1_261219.ScanId;v=1;d1=34384.34384.3	controllerType=0 controllerNumber=1 scan=34384	73.6139
35476:4	1	S.MPLPPHPGHPGYINFSYEVLTPLKWY.Q			764.145	4	3053.56	3053.54	0	6.1	17	Non	211.15	211.15	211.15	4.34	1206	>sp|P02817|AMELX_BOVIN Amelogenin, X isoform OS=Bos taurus OX=9913 GN=AMELX PE=1 SV=2	1	hf1_10472_ebo_26_1_261219.ScanId;v=1;d1=26232.26232.4	controllerType=0 controllerNumber=1 scan=26232	54.8541
32773:4	1	S.MPLPPHPGHPGYINFSYEVLTPLKWY.Q			764.143	4	3053.55	3053.54	0	3.4	17	Non	224.83	224.83	224.83	3.92	1206	>sp|P02817|AMELX_BOVIN Amelogenin, X isoform OS=Bos taurus OX=9913 GN=AMELX PE=1 SV=2	1	hf1_10472_ebo_26_1_261219.ScanId;v=1;d1=24391.24391.4	controllerType=0 controllerNumber=1 scan=24391	51.5603
32781:4	1	S.MPLPPHPGHPGYINFSYEVLTPLKWY.Q			764.143	4	3053.55	3053.54	0	3.4	17	Non	237.17	237.17	237.17	3.92	1206	>sp|P02817|AMELX_BOVIN Amelogenin, X isoform OS=Bos taurus OX=9913 GN=AMELX PE=1 SV=2	1	hf1_10472_ebo_26_1_261219.ScanId;v=1;d1=24395.24395.4	controllerType=0 controllerNumber=1 scan=24395	51.5659
33594:4	1	S.MPLPPHPGHPGYINFSYEVLTPLKWY.Q			764.145	4	3053.56	3053.54	0	5.9	17	Non	417.99	417.99	417.99	7.34	1206	>sp|P02817|AMELX_BOVIN Amelogenin, X isoform OS=Bos taurus OX=9913 GN=AMELX PE=1 SV=2	1	hf1_10472_ebo_26_1_261219.ScanId;v=1;d1=24944.24944.4	controllerType=0 controllerNumber=1 scan=24944	52.5441
32913:4	1	S.MP[+15.995]LPPHPGHPGYINFSYEVLTPLKWY.Q		P[+16]	768.14	4	3069.54	3069.53	0	1.6	17	Non	115.55	115.55	5.8	2.21	1206	>sp|P02817|AMELX_BOVIN Amelogenin, X isoform OS=Bos taurus OX=9913 GN=AMELX PE=1 SV=2	1	hf1_10472_ebo_26_1_261219.ScanId;v=1;d1=24486.24486.5	controllerType=0 controllerNumber=1 scan=24486	51.7264
36841:4	1	S.MPLPPHPGHPGYINFS[+79.966]YEVLTPLKWY.Q		S[+80]	784.137	4	3133.53	3133.5	0	6.6	17	Non	231.49	231.49	11.45	4.59	1206	>sp|P02817|AMELX_BOVIN Amelogenin, X isoform OS=Bos taurus OX=9913 GN=AMELX PE=1 SV=2	1	hf1_10472_ebo_26_1_261219.ScanId;v=1;d1=27133.27133.4	controllerType=0 controllerNumber=1 scan=27133	56.4644
36189:3	1	S.MPLPPHPGHPGYINFS[+79.966]YEVLTPLKWY.Q		S[+80]	1045.18	3	3133.51	3133.5	0	3.2	17	Non	276.98	276.98	127.49	4.92	1206	>sp|P02817|AMELX_BOVIN Amelogenin, X isoform OS=Bos taurus OX=9913 GN=AMELX PE=1 SV=2	1	hf1_10472_ebo_26_1_261219.ScanId;v=1;d1=26704.26704.3	controllerType=0 controllerNumber=1 scan=26704	55.7003
32791:4	1	S.MP[+15.995]LPPHPGHPGYINFSYEVLTPLKWY.Q		P[+16]	768.143	4	3069.55	3069.53	0	5	17	Non	278.06	278.06	7.3	5.58	1206	>sp|P02817|AMELX_BOVIN Amelogenin, X isoform OS=Bos taurus OX=9913 GN=AMELX PE=1 SV=2	1	hf1_10472_ebo_26_1_261219.ScanId;v=1;d1=24402.24402.4	controllerType=0 controllerNumber=1 scan=24402	51.5792
35959:4	1	S.MPLPPHPGHPGYINFS[+79.966]YEVLTPLKWY.Q		S[+80]	784.137	4	3133.53	3133.5	0	6.6	17	Non	330.07	330.07	26.18	6.12	1206	>sp|P02817|AMELX_BOVIN Amelogenin, X isoform OS=Bos taurus OX=9913 GN=AMELX PE=1 SV=2	1	hf1_10472_ebo_26_1_261219.ScanId;v=1;d1=26554.26554.4	controllerType=0 controllerNumber=1 scan=26554	55.4315
35668:4	1	S.MPLPPHPGHPGYINFS[+79.966]YEVLTPLKWY.Q		S[+80]	784.138	4	3133.53	3133.5	0	7.5	17	Non	336.27	336.27	58.11	6.12	1206	>sp|P02817|AMELX_BOVIN Amelogenin, X isoform OS=Bos taurus OX=9913 GN=AMELX PE=1 SV=2	1	hf1_10472_ebo_26_1_261219.ScanId;v=1;d1=26363.26363.4	controllerType=0 controllerNumber=1 scan=26363	55.0909
35383:4	1	S.MPLPPHPGHPGYINFS[+79.966]YEVLTPLKWY.Q		S[+80]	784.138	4	3133.53	3133.5	0	7.6	17	Non	338.99	338.99	45.46	6.12	1206	>sp|P02817|AMELX_BOVIN Amelogenin, X isoform OS=Bos taurus OX=9913 GN=AMELX PE=1 SV=2	1	hf1_10472_ebo_26_1_261219.ScanId;v=1;d1=26169.26169.4	controllerType=0 controllerNumber=1 scan=26169	54.7425
32476:4	1	S.MP[+15.995]LPPHPGHPGYINFSYEVLTPLKWY.Q		P[+16]	768.144	4	3069.55	3069.53	0	6.6	17	Non	343.63	343.63	7.3	6.12	1206	>sp|P02817|AMELX_BOVIN Amelogenin, X isoform OS=Bos taurus OX=9913 GN=AMELX PE=1 SV=2	1	hf1_10472_ebo_26_1_261219.ScanId;v=1;d1=24199.24199.4	controllerType=0 controllerNumber=1 scan=24199	51.218
46187:3	1	S.MPLPPHPGHPGYINFS[+79.966]YEVLTPLKWY.Q		S[+80]	1045.18	3	3133.53	3133.5	0	7.9	17	Non	713.72	713.72	318.53	12.07	1206	>sp|P02817|AMELX_BOVIN Amelogenin, X isoform OS=Bos taurus OX=9913 GN=AMELX PE=1 SV=2	1	hf1_10472_ebo_26_1_261219.ScanId;v=1;d1=34345.34345.3	controllerType=0 controllerNumber=1 scan=34345	73.5438
35366:3	1	S.MPLPPHPGHPGYINFS[+79.966]YEVLTPLKWY.Q		S[+80]	1045.18	3	3133.53	3133.5	0	8.3	17	Non	843.52	843.52	365.16	13.75	1206	>sp|P02817|AMELX_BOVIN Amelogenin, X isoform OS=Bos taurus OX=9913 GN=AMELX PE=1 SV=2	1	hf1_10472_ebo_26_1_261219.ScanId;v=1;d1=26157.26157.3	controllerType=0 controllerNumber=1 scan=26157	54.7218
35652:3	1	S.MPLPPHPGHPGYINFS[+79.966]YEVLTPLKWY.Q		S[+80]	1045.18	3	3133.52	3133.5	0	6.4	17	Non	870.52	870.52	364.09	15.07	1206	>sp|P02817|AMELX_BOVIN Amelogenin, X isoform OS=Bos taurus OX=9913 GN=AMELX PE=1 SV=2	1	hf1_10472_ebo_26_1_261219.ScanId;v=1;d1=26352.26352.3	controllerType=0 controllerNumber=1 scan=26352	55.0715
35943:3	1	S.MPLPPHPGHPGYINFS[+79.966]YEVLTPLKWY.Q		S[+80]	1045.18	3	3133.52	3133.5	0	5.8	17	Non	968.46	968.46	399.51	17.02	1206	>sp|P02817|AMELX_BOVIN Amelogenin, X isoform OS=Bos taurus OX=9913 GN=AMELX PE=1 SV=2	1	hf1_10472_ebo_26_1_261219.ScanId;v=1;d1=26543.26543.3	controllerType=0 controllerNumber=1 scan=26543	55.4121
34821:4	1	S.MPLPPHPGHPGYINFS[+79.966]YEVLTPLKW[+31.990]Y.Q		S[+80], W[+32]	792.135	4	3165.52	3165.49	0	7.4	17	Non	69.08	69.08	14.88	2.17	1206	>sp|P02817|AMELX_BOVIN Amelogenin, X isoform OS=Bos taurus OX=9913 GN=AMELX PE=1 SV=2	1	hf1_10472_ebo_26_1_261219.ScanId;v=1;d1=25791.25791.3	controllerType=0 controllerNumber=1 scan=25791	54.0603
32208:3	1	S.MPLPPHPGHPGYINFS[+79.966]YEVLTPLKWY[+31.990].Q		S[+80], Y[+32]	1055.84	3	3165.52	3165.49	0	6.7	17	Non	93.54	93.54	0	2.19	1206	>sp|P02817|AMELX_BOVIN Amelogenin, X isoform OS=Bos taurus OX=9913 GN=AMELX PE=1 SV=2	1	hf1_10472_ebo_26_1_261219.ScanId;v=1;d1=24031.24031.3	controllerType=0 controllerNumber=1 scan=24031	50.9233
34992:4	1	S.MPLPPHPGHPGYINFS[+79.966]YEVLTPLKW[+31.990]Y.Q		S[+80], W[+32]	792.135	4	3165.52	3165.49	0	7.4	17	Non	154.83	154.83	17.71	2.86	1206	>sp|P02817|AMELX_BOVIN Amelogenin, X isoform OS=Bos taurus OX=9913 GN=AMELX PE=1 SV=2	1	hf1_10472_ebo_26_1_261219.ScanId;v=1;d1=25904.25904.4	controllerType=0 controllerNumber=1 scan=25904	54.2702
33881:4	1	S.MPLPPHPGHPGYINFS[+79.966]YEVLTPLKW[+15.995]Y.Q		S[+80], W[+16]	788.135	4	3149.52	3149.5	0	5.7	17	Non	176.43	176.43	12.95	3.63	1206	>sp|P02817|AMELX_BOVIN Amelogenin, X isoform OS=Bos taurus OX=9913 GN=AMELX PE=1 SV=2	1	hf1_10472_ebo_26_1_261219.ScanId;v=1;d1=25141.25141.4	controllerType=0 controllerNumber=1 scan=25141	52.8907
36042:4	1	S.MPLPP[+15.995]HPGHPGYINFS[+79.966]YEVLTPLKWY.Q		P[+16], S[+80]	788.134	4	3149.51	3149.5	0	4.1	17	Non	183.22	183.22	1.04	3.23	1206	>sp|P02817|AMELX_BOVIN Amelogenin, X isoform OS=Bos taurus OX=9913 GN=AMELX PE=1 SV=2	1	hf1_10472_ebo_26_1_261219.ScanId;v=1;d1=26610.26610.4	controllerType=0 controllerNumber=1 scan=26610	55.5329
33909:4	1	S.MPLPPHPGHPGYINFS[+79.966]YEVLTPLKW[+15.995]Y.Q		S[+80], W[+16]	788.134	4	3149.52	3149.5	0	5	17	Non	194.29	194.29	15.78	4.06	1206	>sp|P02817|AMELX_BOVIN Amelogenin, X isoform OS=Bos taurus OX=9913 GN=AMELX PE=1 SV=2	1	hf1_10472_ebo_26_1_261219.ScanId;v=1;d1=25162.25162.4	controllerType=0 controllerNumber=1 scan=25162	52.9291
32500:3	1	S.MPLPPHPGHPGYINFS[+79.966]YEVLTPLKWY[+15.995].Q		S[+80], Y[+16]	1050.51	3	3149.53	3149.5	0	8.9	17	Non	197.74	197.74	0	3.34	1206	>sp|P02817|AMELX_BOVIN Amelogenin, X isoform OS=Bos taurus OX=9913 GN=AMELX PE=1 SV=2	1	hf1_10472_ebo_26_1_261219.ScanId;v=1;d1=24213.24213.3	controllerType=0 controllerNumber=1 scan=24213	51.2447
32978:4	1	S.MPLPPHPGHPGYINFS[+79.966]YEVLTPLKW[+15.995]Y.Q		S[+80], W[+16]	788.137	4	3149.52	3149.5	0	8	17	Non	204.95	204.95	9.98	3.95	1206	>sp|P02817|AMELX_BOVIN Amelogenin, X isoform OS=Bos taurus OX=9913 GN=AMELX PE=1 SV=2	1	hf1_10472_ebo_26_1_261219.ScanId;v=1;d1=24529.24529.4	controllerType=0 controllerNumber=1 scan=24529	51.8051
36842:4	1	S.MPLPPHPGHPGYIN[+0.984]FS[+79.966]YEVLTPLKWY.Q		N[+1], S[+80]	784.383	4	3134.51	3134.49	0	6.8	17	Non	209.02	209.02	16.21	4.39	1206	>sp|P02817|AMELX_BOVIN Amelogenin, X isoform OS=Bos taurus OX=9913 GN=AMELX PE=1 SV=2	1	hf1_10472_ebo_26_1_261219.ScanId;v=1;d1=27133.27133.4	controllerType=0 controllerNumber=1 scan=27133	56.4644
35620:4	1	S.MPLPPHPGHPGYINFS[+79.966]Y[+15.995]EVLTPLKWY.Q		S[+80], Y[+16]	788.134	4	3149.51	3149.5	0	4.2	17	Non	211.54	211.54	7.59	3.91	1206	>sp|P02817|AMELX_BOVIN Amelogenin, X isoform OS=Bos taurus OX=9913 GN=AMELX PE=1 SV=2	1	hf1_10472_ebo_26_1_261219.ScanId;v=1;d1=26331.26331.4	controllerType=0 controllerNumber=1 scan=26331	55.034
34711:4	1	S.MPLPPHPGHPGYINFS[+79.966]YEVLTPLKW[+31.990]Y.Q		S[+80], W[+32]	792.135	4	3165.52	3165.49	0	7.2	17	Non	250.18	250.18	15.91	5.42	1206	>sp|P02817|AMELX_BOVIN Amelogenin, X isoform OS=Bos taurus OX=9913 GN=AMELX PE=1 SV=2	1	hf1_10472_ebo_26_1_261219.ScanId;v=1;d1=25717.25717.4	controllerType=0 controllerNumber=1 scan=25717	53.9305
35664:3	1	S.MPLPPHPGHPGYINFS[+79.966]YEVLTPLKWY[+31.990].Q		S[+80], Y[+32]	1055.84	3	3165.52	3165.49	0	7.5	17	Non	260.47	260.47	0	5.39	1206	>sp|P02817|AMELX_BOVIN Amelogenin, X isoform OS=Bos taurus OX=9913 GN=AMELX PE=1 SV=2	1	hf1_10472_ebo_26_1_261219.ScanId;v=1;d1=26359.26359.3	controllerType=0 controllerNumber=1 scan=26359	55.0821
36257:4	1	S.MPLPPHPGHPGYIN[+0.984]FS[+79.966]YEVLTPLKWY.Q		N[+1], S[+80]	784.383	4	3134.51	3134.49	0	7.1	17	Non	281.08	281.08	46.84	5.93	1206	>sp|P02817|AMELX_BOVIN Amelogenin, X isoform OS=Bos taurus OX=9913 GN=AMELX PE=1 SV=2	1	hf1_10472_ebo_26_1_261219.ScanId;v=1;d1=26748.26748.4	controllerType=0 controllerNumber=1 scan=26748	55.778
34752:4	1	S.MP[+15.995]LPPHPGHPGYINFS[+79.966]YEVLTPLKWY.Q		P[+16], S[+80]	788.135	4	3149.52	3149.5	0	6.4	17	Non	298.27	298.27	5.8	5.93	1206	>sp|P02817|AMELX_BOVIN Amelogenin, X isoform OS=Bos taurus OX=9913 GN=AMELX PE=1 SV=2	1	hf1_10472_ebo_26_1_261219.ScanId;v=1;d1=25744.25744.4	controllerType=0 controllerNumber=1 scan=25744	53.9783
35031:4	1	S.MP[+15.995]LPPHPGHPGYINFS[+79.966]YEVLTPLKWY.Q		P[+16], S[+80]	788.134	4	3149.51	3149.5	0	4.4	17	Non	310.96	310.96	5.8	5.88	1206	>sp|P02817|AMELX_BOVIN Amelogenin, X isoform OS=Bos taurus OX=9913 GN=AMELX PE=1 SV=2	1	hf1_10472_ebo_26_1_261219.ScanId;v=1;d1=25933.25933.4	controllerType=0 controllerNumber=1 scan=25933	54.3245
35327:4	1	S.MP[+15.995]LPPHPGHPGYINFS[+79.966]YEVLTPLKWY.Q		P[+16], S[+80]	788.134	4	3149.51	3149.5	0	4.3	17	Non	322.35	322.35	5.8	5.98	1206	>sp|P02817|AMELX_BOVIN Amelogenin, X isoform OS=Bos taurus OX=9913 GN=AMELX PE=1 SV=2	1	hf1_10472_ebo_26_1_261219.ScanId;v=1;d1=26132.26132.4	controllerType=0 controllerNumber=1 scan=26132	54.6783
34469:4	1	S.MP[+15.995]LPPHPGHPGYINFS[+79.966]YEVLTPLKWY.Q		P[+16], S[+80]	788.135	4	3149.52	3149.5	0	6.5	17	Non	324.1	324.1	4	6.02	1206	>sp|P02817|AMELX_BOVIN Amelogenin, X isoform OS=Bos taurus OX=9913 GN=AMELX PE=1 SV=2	1	hf1_10472_ebo_26_1_261219.ScanId;v=1;d1=25547.25547.4	controllerType=0 controllerNumber=1 scan=25547	53.6248
34187:4	1	S.MP[+15.995]LPPHPGHPGYINFS[+79.966]YEVLTPLKWY.Q		P[+16], S[+80]	788.135	4	3149.52	3149.5	0	5.8	17	Non	325.16	325.16	4	6.08	1206	>sp|P02817|AMELX_BOVIN Amelogenin, X isoform OS=Bos taurus OX=9913 GN=AMELX PE=1 SV=2	1	hf1_10472_ebo_26_1_261219.ScanId;v=1;d1=25353.25353.4	controllerType=0 controllerNumber=1 scan=25353	53.2735
34962:3	1	S.MPLPPHPGHPGYINFS[+79.966]YEVLTPLKWY[+31.990].Q		S[+80], Y[+32]	1055.85	3	3165.52	3165.49	0	8.5	17	Non	494.49	494.49	0	7.14	1206	>sp|P02817|AMELX_BOVIN Amelogenin, X isoform OS=Bos taurus OX=9913 GN=AMELX PE=1 SV=2	1	hf1_10472_ebo_26_1_261219.ScanId;v=1;d1=25885.25885.3	controllerType=0 controllerNumber=1 scan=25885	54.2331
46226:3	1	S.M[+15.995]PLPPHPGHPGYINFS[+79.966]YEVLTPLKWY.Q		M[+16], S[+80]	1050.51	3	3149.53	3149.5	0	8.1	17	Non	731.54	731.54	32.73	11.75	1206	>sp|P02817|AMELX_BOVIN Amelogenin, X isoform OS=Bos taurus OX=9913 GN=AMELX PE=1 SV=2	1	hf1_10472_ebo_26_1_261219.ScanId;v=1;d1=34374.34374.3	controllerType=0 controllerNumber=1 scan=34374	73.5959
34673:3	1	S.MPLPPHPGHPGYINFS[+79.966]YEVLTPLKWY[+31.990].Q		S[+80], Y[+32]	1055.84	3	3165.52	3165.49	0	6.8	17	Non	803.31	803.31	0	14.07	1206	>sp|P02817|AMELX_BOVIN Amelogenin, X isoform OS=Bos taurus OX=9913 GN=AMELX PE=1 SV=2	1	hf1_10472_ebo_26_1_261219.ScanId;v=1;d1=25693.25693.3	controllerType=0 controllerNumber=1 scan=25693	53.8859
34826:3	1	S.M[+15.995]PLPPHPGHPGYINFS[+79.966]YEVLTPLKWY.Q		M[+16], S[+80]	1050.51	3	3149.52	3149.5	0	5.8	17	Non	835.62	835.62	19.37	14.02	1206	>sp|P02817|AMELX_BOVIN Amelogenin, X isoform OS=Bos taurus OX=9913 GN=AMELX PE=1 SV=2	1	hf1_10472_ebo_26_1_261219.ScanId;v=1;d1=25795.25795.3	controllerType=0 controllerNumber=1 scan=25795	54.0692
34265:3	1	S.M[+15.995]PLPPHPGHPGYINFS[+79.966]YEVLTPLKWY.Q		M[+16], S[+80]	1050.51	3	3149.52	3149.5	0	6	17	Non	885.14	885.14	15.38	15.02	1206	>sp|P02817|AMELX_BOVIN Amelogenin, X isoform OS=Bos taurus OX=9913 GN=AMELX PE=1 SV=2	1	hf1_10472_ebo_26_1_261219.ScanId;v=1;d1=25404.25404.3	controllerType=0 controllerNumber=1 scan=25404	53.3654
36484:3	1	S.MPLPPHPGHPGYIN[+0.984]FS[+79.966]YEVLTPLKWY.Q		N[+1], S[+80]	1045.51	3	3134.51	3134.49	0	7	17	Non	885.33	885.33	404.5	15.07	1206	>sp|P02817|AMELX_BOVIN Amelogenin, X isoform OS=Bos taurus OX=9913 GN=AMELX PE=1 SV=2	1	hf1_10472_ebo_26_1_261219.ScanId;v=1;d1=26898.26898.3	controllerType=0 controllerNumber=1 scan=26898	56.0439
34548:3	1	S.M[+15.995]PLPPHPGHPGYINFS[+79.966]YEVLTPLKWY.Q		M[+16], S[+80]	1050.51	3	3149.52	3149.5	0	6.4	17	Non	899.08	899.08	31.76	15.07	1206	>sp|P02817|AMELX_BOVIN Amelogenin, X isoform OS=Bos taurus OX=9913 GN=AMELX PE=1 SV=2	1	hf1_10472_ebo_26_1_261219.ScanId;v=1;d1=25602.25602.3	controllerType=0 controllerNumber=1 scan=25602	53.7201
40175:4	1	S.MPLPPHPGHPGY[+15.995]INF[+31.990]SY[+31.990]EVLTPLKWY.Q		F[+32], Y[+16][+32]	784.135	4	3133.52	3133.51	0	1.2	17	Non	29.09	29.09	11.14	2.18	1206	>sp|P02817|AMELX_BOVIN Amelogenin, X isoform OS=Bos taurus OX=9913 GN=AMELX PE=1 SV=2	1	hf1_10472_ebo_26_1_261219.ScanId;v=1;d1=29313.29313.4	controllerType=0 controllerNumber=1 scan=29313	60.3577
41035:4	1	S.MPLPPHPGHPGY[+31.990]INF[+31.990]SY[+15.995]EVLTPLKWY.Q		F[+32], Y[+16][+32]	784.133	4	3133.51	3133.51	0	-1.4	17	Non	30.05	30.05	1.5	2.2	1206	>sp|P02817|AMELX_BOVIN Amelogenin, X isoform OS=Bos taurus OX=9913 GN=AMELX PE=1 SV=2	1	hf1_10472_ebo_26_1_261219.ScanId;v=1;d1=29882.29882.4	controllerType=0 controllerNumber=1 scan=29882	61.3754
42379:4	1	S.MPLPPHPGHPGY[+31.990]INF[+31.990]SY[+15.995]EVLTPLKWY.Q		F[+32], Y[+16][+32]	784.136	4	3133.52	3133.51	0	2.7	17	Non	54.1	54.1	19.85	2.3	1206	>sp|P02817|AMELX_BOVIN Amelogenin, X isoform OS=Bos taurus OX=9913 GN=AMELX PE=1 SV=2	1	hf1_10472_ebo_26_1_261219.ScanId;v=1;d1=30756.30756.4	controllerType=0 controllerNumber=1 scan=30756	62.943
35552:4	1	S.MPLPPHPGHPGYIN[+0.984]FS[+79.966]YEVLTPLKW[+31.990]Y.Q		N[+1], S[+80], W[+32]	792.379	4	3166.49	3166.48	0	5.1	17	Non	71.46	71.46	14.18	2.17	1206	>sp|P02817|AMELX_BOVIN Amelogenin, X isoform OS=Bos taurus OX=9913 GN=AMELX PE=1 SV=2	1	hf1_10472_ebo_26_1_261219.ScanId;v=1;d1=26283.26283.4	controllerType=0 controllerNumber=1 scan=26283	54.9451
33827:4	1	S.MP[+15.995]LPPHPGHPGYINF[+15.995]S[+79.966]YEVLTPLKWY.Q		F[+16], P[+16], S[+80]	792.134	4	3165.51	3165.49	0	6.1	17	Non	101.08	101.08	13.77	2.19	1206	>sp|P02817|AMELX_BOVIN Amelogenin, X isoform OS=Bos taurus OX=9913 GN=AMELX PE=1 SV=2	1	hf1_10472_ebo_26_1_261219.ScanId;v=1;d1=25103.25103.3	controllerType=0 controllerNumber=1 scan=25103	52.8224
31875:4	1	S.MP[+15.995]LPPHPGHPGYINFS[+79.966]YEVLTPLKW[+15.995]Y.Q		P[+16], S[+80], W[+16]	792.133	4	3165.51	3165.49	0	4.5	17	Non	104.12	104.12	5.8	2.61	1206	>sp|P02817|AMELX_BOVIN Amelogenin, X isoform OS=Bos taurus OX=9913 GN=AMELX PE=1 SV=2	1	hf1_10472_ebo_26_1_261219.ScanId;v=1;d1=23814.23814.4	controllerType=0 controllerNumber=1 scan=23814	50.5454
34940:4	1	S.MPLPPHPGHPGY[+15.995]INF[+31.990]SY[+31.990]EVLTPLKWY.Q		F[+32], Y[+16][+32]	784.138	4	3133.53	3133.51	0	5.2	17	Non	104.47	104.47	7.97	2.19	1206	>sp|P02817|AMELX_BOVIN Amelogenin, X isoform OS=Bos taurus OX=9913 GN=AMELX PE=1 SV=2	1	hf1_10472_ebo_26_1_261219.ScanId;v=1;d1=25872.25872.4	controllerType=0 controllerNumber=1 scan=25872	54.2107
46244:4	1	S.MP[+15.995]LPPHPGHPGYINFS[+79.966]YEVLTPLKW[+31.990]Y.Q		P[+16], S[+80], W[+32]	796.135	4	3181.52	3181.49	0	9.1	17	Non	107.01	107.01	5.8	2.16	1206	>sp|P02817|AMELX_BOVIN Amelogenin, X isoform OS=Bos taurus OX=9913 GN=AMELX PE=1 SV=2	1	hf1_10472_ebo_26_1_261219.ScanId;v=1;d1=34388.34388.4	controllerType=0 controllerNumber=1 scan=34388	73.6199
31442:4	1	S.MP[+15.995]LPPHPGHPGYINFS[+79.966]YEVLTPLKW[+31.990]Y.Q		P[+16], S[+80], W[+32]	796.133	4	3181.51	3181.49	0	6.8	17	Non	123.59	123.59	5.8	2.86	1206	>sp|P02817|AMELX_BOVIN Amelogenin, X isoform OS=Bos taurus OX=9913 GN=AMELX PE=1 SV=2	1	hf1_10472_ebo_26_1_261219.ScanId;v=1;d1=23529.23529.4	controllerType=0 controllerNumber=1 scan=23529	50.0419
31579:4	1	S.MP[+15.995]LPPHPGHPGYINFS[+79.966]YEVLTPLKW[+15.995]Y.Q		P[+16], S[+80], W[+16]	792.133	4	3165.51	3165.49	0	5.3	17	Non	126.62	126.62	5.8	2.82	1206	>sp|P02817|AMELX_BOVIN Amelogenin, X isoform OS=Bos taurus OX=9913 GN=AMELX PE=1 SV=2	1	hf1_10472_ebo_26_1_261219.ScanId;v=1;d1=23615.23615.4	controllerType=0 controllerNumber=1 scan=23615	50.1924
33284:3	1	S.MP[+15.995]LPPHPGHPGYINFS[+79.966]YEVLTPLKWY[+31.990].Q		P[+16], S[+80], Y[+32]	1061.18	3	3181.52	3181.49	0	8.4	17	Non	131.53	131.53	0	2.19	1206	>sp|P02817|AMELX_BOVIN Amelogenin, X isoform OS=Bos taurus OX=9913 GN=AMELX PE=1 SV=2	1	hf1_10472_ebo_26_1_261219.ScanId;v=1;d1=24734.24734.3	controllerType=0 controllerNumber=1 scan=24734	52.169
30817:4	1	S.MP[+15.995]LPPHPGHPGYINFS[+79.966]YEVLTPLKW[+31.990]Y.Q		P[+16], S[+80], W[+32]	796.135	4	3181.52	3181.49	0	8.4	17	Non	131.86	131.86	5.8	2.19	1206	>sp|P02817|AMELX_BOVIN Amelogenin, X isoform OS=Bos taurus OX=9913 GN=AMELX PE=1 SV=2	1	hf1_10472_ebo_26_1_261219.ScanId;v=1;d1=23120.23120.4	controllerType=0 controllerNumber=1 scan=23120	49.3244
34431:4	1	S.MP[+15.995]LPPHPGHPGYINF[+15.995]S[+79.966]YEVLTPLKWY.Q		F[+16], P[+16], S[+80]	792.134	4	3165.51	3165.49	0	5.6	17	Non	132.67	132.67	5.53	2.82	1206	>sp|P02817|AMELX_BOVIN Amelogenin, X isoform OS=Bos taurus OX=9913 GN=AMELX PE=1 SV=2	1	hf1_10472_ebo_26_1_261219.ScanId;v=1;d1=25522.25522.4	controllerType=0 controllerNumber=1 scan=25522	53.5787
30955:4	1	S.MP[+15.995]LPPHPGHPGYINFS[+79.966]YEVLTPLKW[+15.995]Y.Q		P[+16], S[+80], W[+16]	792.135	4	3165.52	3165.49	0	7.4	17	Non	142.32	142.32	5.8	2.86	1206	>sp|P02817|AMELX_BOVIN Amelogenin, X isoform OS=Bos taurus OX=9913 GN=AMELX PE=1 SV=2	1	hf1_10472_ebo_26_1_261219.ScanId;v=1;d1=23209.23209.4	controllerType=0 controllerNumber=1 scan=23209	49.4804
35498:5	1	S.MPLPPHPGHPGY[+15.995]INF[+31.990]SY[+31.990]EVLTPLKWY.Q		F[+32], Y[+16][+32]	627.511	5	3133.53	3133.51	0	4.2	17	Non	154.58	154.58	24.23	2.61	1206	>sp|P02817|AMELX_BOVIN Amelogenin, X isoform OS=Bos taurus OX=9913 GN=AMELX PE=1 SV=2	1	hf1_10472_ebo_26_1_261219.ScanId;v=1;d1=26245.26245.5	controllerType=0 controllerNumber=1 scan=26245	54.8765
31260:4	1	S.MP[+15.995]LPPHPGHPGYINFS[+79.966]YEVLTPLKW[+15.995]Y.Q		P[+16], S[+80], W[+16]	792.135	4	3165.52	3165.49	0	7.2	17	Non	164.43	164.43	5.8	3.67	1206	>sp|P02817|AMELX_BOVIN Amelogenin, X isoform OS=Bos taurus OX=9913 GN=AMELX PE=1 SV=2	1	hf1_10472_ebo_26_1_261219.ScanId;v=1;d1=23412.23412.4	controllerType=0 controllerNumber=1 scan=23412	49.8381
33317:4	1	S.MP[+15.995]LPPHPGHPGYINFS[+79.966]YEVLTPLKW[+31.990]Y.Q		P[+16], S[+80], W[+32]	796.131	4	3181.5	3181.49	0	4.4	17	Non	180.54	180.54	5.8	3.63	1206	>sp|P02817|AMELX_BOVIN Amelogenin, X isoform OS=Bos taurus OX=9913 GN=AMELX PE=1 SV=2	1	hf1_10472_ebo_26_1_261219.ScanId;v=1;d1=24757.24757.4	controllerType=0 controllerNumber=1 scan=24757	52.2081
35980:3	1	S.MPLPPHPGHPGY[+15.995]IN[+0.984]FS[+79.966]YEVLTPLKWY.Q		N[+1], S[+80], Y[+16]	1050.84	3	3150.51	3150.48	0	8.5	17	Non	196.44	196.44	14.45	3.76	1206	>sp|P02817|AMELX_BOVIN Amelogenin, X isoform OS=Bos taurus OX=9913 GN=AMELX PE=1 SV=2	1	hf1_10472_ebo_26_1_261219.ScanId;v=1;d1=26567.26567.3	controllerType=0 controllerNumber=1 scan=26567	55.4539
32536:4	1	S.MP[+15.995]LPPHPGHPGYINFS[+79.966]YEVLTPLKW[+15.995]Y.Q		P[+16], S[+80], W[+16]	792.135	4	3165.52	3165.49	0	7.5	17	Non	221.85	221.85	5.8	4.39	1206	>sp|P02817|AMELX_BOVIN Amelogenin, X isoform OS=Bos taurus OX=9913 GN=AMELX PE=1 SV=2	1	hf1_10472_ebo_26_1_261219.ScanId;v=1;d1=24236.24236.4	controllerType=0 controllerNumber=1 scan=24236	51.2851
35328:4	1	S.MP[+15.995]LPPHPGHPGYIN[+0.984]FS[+79.966]YEVLTPLKWY.Q		N[+1], P[+16], S[+80]	788.384	4	3150.51	3150.48	0	9.7	17	Non	237.05	237.05	2.12	4.08	1206	>sp|P02817|AMELX_BOVIN Amelogenin, X isoform OS=Bos taurus OX=9913 GN=AMELX PE=1 SV=2	1	hf1_10472_ebo_26_1_261219.ScanId;v=1;d1=26132.26132.4	controllerType=0 controllerNumber=1 scan=26132	54.6783
32838:4	1	S.MP[+15.995]LPPHPGHPGYINFS[+79.966]YEVLTPLKW[+15.995]Y.Q		P[+16], S[+80], W[+16]	792.133	4	3165.51	3165.49	0	5.4	17	Non	237.27	237.27	5.8	4.34	1206	>sp|P02817|AMELX_BOVIN Amelogenin, X isoform OS=Bos taurus OX=9913 GN=AMELX PE=1 SV=2	1	hf1_10472_ebo_26_1_261219.ScanId;v=1;d1=24435.24435.4	controllerType=0 controllerNumber=1 scan=24435	51.6391
34453:3	1	S.MP[+15.995]LPPHPGHPGYINFS[+79.966]YEVLTPLKWY[+31.990].Q		P[+16], S[+80], Y[+32]	1061.17	3	3181.49	3181.49	0	1.8	17	Non	239.34	239.34	0	3.38	1206	>sp|P02817|AMELX_BOVIN Amelogenin, X isoform OS=Bos taurus OX=9913 GN=AMELX PE=1 SV=2	1	hf1_10472_ebo_26_1_261219.ScanId;v=1;d1=25537.25537.3	controllerType=0 controllerNumber=1 scan=25537	53.6069
33863:4	1	S.MP[+15.995]LPPHPGHPGYINF[+15.995]S[+79.966]YEVLTPLKWY.Q		F[+16], P[+16], S[+80]	792.134	4	3165.51	3165.49	0	6.3	17	Non	245.5	245.5	11.43	5.42	1206	>sp|P02817|AMELX_BOVIN Amelogenin, X isoform OS=Bos taurus OX=9913 GN=AMELX PE=1 SV=2	1	hf1_10472_ebo_26_1_261219.ScanId;v=1;d1=25130.25130.4	controllerType=0 controllerNumber=1 scan=25130	52.8715
31259:3	1	S.MP[+15.995]LPPHPGHPGYINFS[+79.966]YEVLTPLKW[+15.995]Y.Q		P[+16], S[+80], W[+16]	1055.84	3	3165.52	3165.49	0	8	17	Non	274.68	274.68	0	5.59	1206	>sp|P02817|AMELX_BOVIN Amelogenin, X isoform OS=Bos taurus OX=9913 GN=AMELX PE=1 SV=2	1	hf1_10472_ebo_26_1_261219.ScanId;v=1;d1=23411.23411.3	controllerType=0 controllerNumber=1 scan=23411	49.8365
30845:3	1	S.MP[+15.995]LPPHPGHPGYINFS[+79.966]YEVLTPLKWY[+31.990].Q		P[+16], S[+80], Y[+32]	1061.18	3	3181.51	3181.49	0	7.2	17	Non	275.23	275.23	5.8	5.59	1206	>sp|P02817|AMELX_BOVIN Amelogenin, X isoform OS=Bos taurus OX=9913 GN=AMELX PE=1 SV=2	1	hf1_10472_ebo_26_1_261219.ScanId;v=1;d1=23138.23138.3	controllerType=0 controllerNumber=1 scan=23138	49.3571
31125:4	1	S.M[+15.995]PLPPHPGHPGYINFS[+79.966]YEVLTPLKW[+31.990]Y.Q		M[+16], S[+80], W[+32]	796.133	4	3181.51	3181.49	0	6.3	17	Non	287.94	287.94	2.02	5.93	1206	>sp|P02817|AMELX_BOVIN Amelogenin, X isoform OS=Bos taurus OX=9913 GN=AMELX PE=1 SV=2	1	hf1_10472_ebo_26_1_261219.ScanId;v=1;d1=23322.23322.4	controllerType=0 controllerNumber=1 scan=23322	49.6799
33643:4	1	S.MP[+15.995]LPPHPGHPGYINFS[+79.966]YEVLTPLKW[+31.990]Y.Q		P[+16], S[+80], W[+32]	796.132	4	3181.51	3181.49	0	5.6	17	Non	303.8	303.8	5.8	5.88	1206	>sp|P02817|AMELX_BOVIN Amelogenin, X isoform OS=Bos taurus OX=9913 GN=AMELX PE=1 SV=2	1	hf1_10472_ebo_26_1_261219.ScanId;v=1;d1=24977.24977.4	controllerType=0 controllerNumber=1 scan=24977	52.6013
46183:4	1	S.MPLPPHPGHPGY[+31.990]INF[+15.995]SY[+31.990]EVLTPLKWY.Q		F[+16], Y[+32]*2	784.136	4	3133.52	3133.51	0	3.5	17	Non	309.97	309.97	4.26	5.56	1206	>sp|P02817|AMELX_BOVIN Amelogenin, X isoform OS=Bos taurus OX=9913 GN=AMELX PE=1 SV=2	1	hf1_10472_ebo_26_1_261219.ScanId;v=1;d1=34342.34342.4	controllerType=0 controllerNumber=1 scan=34342	73.5392
32521:3	1	S.MP[+15.995]LPPHPGHPGYINFS[+79.966]YEVLTPLKW[+15.995]Y.Q		P[+16], S[+80], W[+16]	1055.84	3	3165.51	3165.49	0	6	17	Non	384.9	384.9	0	6.87	1206	>sp|P02817|AMELX_BOVIN Amelogenin, X isoform OS=Bos taurus OX=9913 GN=AMELX PE=1 SV=2	1	hf1_10472_ebo_26_1_261219.ScanId;v=1;d1=24226.24226.3	controllerType=0 controllerNumber=1 scan=24226	51.2672
33842:3	1	S.MP[+15.995]LPPHPGHPGYINFS[+79.966]YEVLTPLKWY[+31.990].Q		P[+16], S[+80], Y[+32]	1061.18	3	3181.51	3181.49	0	6.9	17	Non	406.3	406.3	0	7.24	1206	>sp|P02817|AMELX_BOVIN Amelogenin, X isoform OS=Bos taurus OX=9913 GN=AMELX PE=1 SV=2	1	hf1_10472_ebo_26_1_261219.ScanId;v=1;d1=25116.25116.3	controllerType=0 controllerNumber=1 scan=25116	52.8476
34017:3	1	S.MP[+15.995]LPPHPGHP[+15.995]GYINFS[+79.966]YEVLTPLKWY.Q		P[+16]*2, S[+80]	1055.85	3	3165.52	3165.49	0	8.6	17	Non	428.27	428.27	5.8	6.72	1206	>sp|P02817|AMELX_BOVIN Amelogenin, X isoform OS=Bos taurus OX=9913 GN=AMELX PE=1 SV=2	1	hf1_10472_ebo_26_1_261219.ScanId;v=1;d1=25234.25234.3	controllerType=0 controllerNumber=1 scan=25234	53.0566
31142:3	1	S.M[+15.995]PLPPHPGHPGYINFS[+79.966]YEVLTPLKWY[+31.990].Q		M[+16], S[+80], Y[+32]	1061.18	3	3181.51	3181.49	0	7.6	17	Non	472.4	472.4	0	7.41	1206	>sp|P02817|AMELX_BOVIN Amelogenin, X isoform OS=Bos taurus OX=9913 GN=AMELX PE=1 SV=2	1	hf1_10472_ebo_26_1_261219.ScanId;v=1;d1=23333.23333.3	controllerType=0 controllerNumber=1 scan=23333	49.6993
32814:3	1	S.MP[+15.995]LPPHPGHPGYINFS[+79.966]YEVLTPLKW[+15.995]Y.Q		P[+16], S[+80], W[+16]	1055.84	3	3165.52	3165.49	0	7.2	17	Non	602.34	602.34	0	10.07	1206	>sp|P02817|AMELX_BOVIN Amelogenin, X isoform OS=Bos taurus OX=9913 GN=AMELX PE=1 SV=2	1	hf1_10472_ebo_26_1_261219.ScanId;v=1;d1=24419.24419.3	controllerType=0 controllerNumber=1 scan=24419	51.6098
33566:3	1	S.M[+15.995]PLPPHPGHPGYINFS[+79.966]YEVLTPLKW[+31.990]Y.Q		M[+16], S[+80], W[+32]	1061.17	3	3181.51	3181.49	0	5.6	17	Non	851.18	851.18	0	15.02	1206	>sp|P02817|AMELX_BOVIN Amelogenin, X isoform OS=Bos taurus OX=9913 GN=AMELX PE=1 SV=2	1	hf1_10472_ebo_26_1_261219.ScanId;v=1;d1=24924.24924.3	controllerType=0 controllerNumber=1 scan=24924	52.5084
35101:3	1	S.M[+15.995]PLPPHPGHPGYIN[+0.984]FS[+79.966]YEVLTPLKWY.Q		M[+16], N[+1], S[+80]	1050.84	3	3150.51	3150.48	0	9.5	17	Non	887.57	869.41	8.58	14.75	1206	>sp|P02817|AMELX_BOVIN Amelogenin, X isoform OS=Bos taurus OX=9913 GN=AMELX PE=1 SV=2	1	hf1_10472_ebo_26_1_261219.ScanId;v=1;d1=25981.25981.3	controllerType=0 controllerNumber=1 scan=25981	54.4111
41036:4	1	S.MPLPPHPGHPGY[+31.990]IN[+0.984]F[+31.990]SY[+15.995]EVLTPLKWY.Q		F[+32], N[+1], Y[+16][+32]	784.387	4	3134.53	3134.5	0	9.9	17	Non	20.14	20.14	1.5	2.36	1206	>sp|P02817|AMELX_BOVIN Amelogenin, X isoform OS=Bos taurus OX=9913 GN=AMELX PE=1 SV=2	1	hf1_10472_ebo_26_1_261219.ScanId;v=1;d1=29882.29882.4	controllerType=0 controllerNumber=1 scan=29882	61.3754
34603:4	1	S.MPLPPHPGHPGY[+15.995]IN[+0.984]F[+31.990]SY[+31.990]EVLTPLKWY.Q		F[+32], N[+1], Y[+16][+32]	784.385	4	3134.52	3134.5	0	7	17	Non	65.88	65.88	12.08	2.17	1206	>sp|P02817|AMELX_BOVIN Amelogenin, X isoform OS=Bos taurus OX=9913 GN=AMELX PE=1 SV=2	1	hf1_10472_ebo_26_1_261219.ScanId;v=1;d1=25643.25643.4	controllerType=0 controllerNumber=1 scan=25643	53.7933
34329:4	1	S.MP[+15.995]LPPHPGHPGYIN[+0.984]FS[+79.966]YEVLTPLKW[+31.990]Y.Q		N[+1], P[+16], S[+80], W[+32]	796.379	4	3182.49	3182.47	0	6.3	17	Non	117.55	117.55	15.25	2.2	1206	>sp|P02817|AMELX_BOVIN Amelogenin, X isoform OS=Bos taurus OX=9913 GN=AMELX PE=1 SV=2	1	hf1_10472_ebo_26_1_261219.ScanId;v=1;d1=25448.25448.4	controllerType=0 controllerNumber=1 scan=25448	53.4418
34182:3	1	S.MP[+15.995]LPPHPGHPGYIN[+0.984]FS[+79.966]YEVLTPLKWY[+31.990].Q		N[+1], P[+16], S[+80], Y[+32]	1061.5	3	3182.5	3182.47	0	7.5	17	Non	145.22	145.22	0	2.83	1206	>sp|P02817|AMELX_BOVIN Amelogenin, X isoform OS=Bos taurus OX=9913 GN=AMELX PE=1 SV=2	1	hf1_10472_ebo_26_1_261219.ScanId;v=1;d1=25349.25349.3	controllerType=0 controllerNumber=1 scan=25349	53.2647
32586:4	1	S.MPLPPHPGHP[+15.995]GY[+31.990]INF[+31.990]SYEVLTPLKW[+15.995]Y.Q		F[+32], P[+16], W[+16], Y[+32]	788.136	4	3149.52	3149.51	0	4.6	17	Non	165.71	165.71	3.86	3.63	1206	>sp|P02817|AMELX_BOVIN Amelogenin, X isoform OS=Bos taurus OX=9913 GN=AMELX PE=1 SV=2	1	hf1_10472_ebo_26_1_261219.ScanId;v=1;d1=24269.24269.4	controllerType=0 controllerNumber=1 scan=24269	51.3434
46200:4	1	S.MP[+15.995]LPPHPGHPGY[+15.995]INF[+31.990]SY[+31.990]EVLTPLKWY.Q		F[+32], P[+16], Y[+16][+32]	788.136	4	3149.52	3149.51	0	5.2	17	Non	173.42	173.42	5.6	3.63	1206	>sp|P02817|AMELX_BOVIN Amelogenin, X isoform OS=Bos taurus OX=9913 GN=AMELX PE=1 SV=2	1	hf1_10472_ebo_26_1_261219.ScanId;v=1;d1=34355.34355.4	controllerType=0 controllerNumber=1 scan=34355	73.5616
31778:3	1	S.MP[+15.995]LPPHPGHPGYIN[+0.984]FS[+79.966]YEVLTPLKWY[+31.990].Q		N[+1], P[+16], S[+80], Y[+32]	1061.5	3	3182.49	3182.47	0	5.9	17	Non	243.35	243.35	5.8	5.34	1206	>sp|P02817|AMELX_BOVIN Amelogenin, X isoform OS=Bos taurus OX=9913 GN=AMELX PE=1 SV=2	1	hf1_10472_ebo_26_1_261219.ScanId;v=1;d1=23748.23748.3	controllerType=0 controllerNumber=1 scan=23748	50.4304
33126:3	1	S.MPLPPHPGHP[+15.995]GYINF[+31.990]SY[+31.990]EVLTPLKW[+15.995]Y.Q		F[+32], P[+16], W[+16], Y[+32]	1050.52	3	3149.53	3149.51	0	8.5	17	Non	243.61	243.61	0	5.08	1206	>sp|P02817|AMELX_BOVIN Amelogenin, X isoform OS=Bos taurus OX=9913 GN=AMELX PE=1 SV=2	1	hf1_10472_ebo_26_1_261219.ScanId;v=1;d1=24631.24631.3	controllerType=0 controllerNumber=1 scan=24631	51.9866
33983:3	1	S.M[+15.995]PLPPHPGHPGYINFSY[+15.995]EVLTP[+31.990]LKW[+31.990]Y.Q		M[+16], P[+32], W[+32], Y[+16]	1050.51	3	3149.52	3149.51	0	4.9	17	Non	246.28	246.28	0	5.34	1206	>sp|P02817|AMELX_BOVIN Amelogenin, X isoform OS=Bos taurus OX=9913 GN=AMELX PE=1 SV=2	1	hf1_10472_ebo_26_1_261219.ScanId;v=1;d1=25212.25212.3	controllerType=0 controllerNumber=1 scan=25212	53.0183
36548:4	1	S.MPLPPHPGHPGY[+31.990]IN[+0.984]F[+31.990]SY[+15.995]EVLTPLKWY.Q		F[+32], N[+1], Y[+16][+32]	784.383	4	3134.51	3134.5	0	4	17	Non	266.87	266.87	9.92	4.95	1206	>sp|P02817|AMELX_BOVIN Amelogenin, X isoform OS=Bos taurus OX=9913 GN=AMELX PE=1 SV=2	1	hf1_10472_ebo_26_1_261219.ScanId;v=1;d1=26938.26938.4	controllerType=0 controllerNumber=1 scan=26938	56.1159
32420:3	1	S.MPLPPHPGHP[+31.990]GYINF[+31.990]SY[+15.995]EVLTPLKW[+15.995]Y.Q		F[+32], P[+32], W[+16], Y[+16]	1050.52	3	3149.53	3149.51	0	7.5	17	Non	331.37	331.37	0	6.09	1206	>sp|P02817|AMELX_BOVIN Amelogenin, X isoform OS=Bos taurus OX=9913 GN=AMELX PE=1 SV=2	1	hf1_10472_ebo_26_1_261219.ScanId;v=1;d1=24165.24165.3	controllerType=0 controllerNumber=1 scan=24165	51.1587
32603:4	1	S.MPLPPHPGHPGYINFSYEVLTPLKWYQ.S			796.16	4	3181.62	3181.6	0	6.9	17	Non	52	52	52	2.17	1206	>sp|P02817|AMELX_BOVIN Amelogenin, X isoform OS=Bos taurus OX=9913 GN=AMELX PE=1 SV=2	1	hf1_10472_ebo_26_1_261219.ScanId;v=1;d1=24280.24280.4	controllerType=0 controllerNumber=1 scan=24280	51.3627
31627:4	1	S.MP[+15.995]LPPHPGHPGYINFSYEVLTPLKWYQ.S		P[+16]	800.157	4	3197.61	3197.59	0	4.1	17	Non	203.92	203.92	5.8	3.92	1206	>sp|P02817|AMELX_BOVIN Amelogenin, X isoform OS=Bos taurus OX=9913 GN=AMELX PE=1 SV=2	1	hf1_10472_ebo_26_1_261219.ScanId;v=1;d1=23647.23647.4	controllerType=0 controllerNumber=1 scan=23647	50.2489
34210:4	1	S.MPLPPHPGHPGYINFS[+79.966]YEVLTPLKWYQ.S		S[+80]	816.151	4	3261.58	3261.56	0	6.3	17	Non	211.82	211.82	33.25	4.39	1206	>sp|P02817|AMELX_BOVIN Amelogenin, X isoform OS=Bos taurus OX=9913 GN=AMELX PE=1 SV=2	1	hf1_10472_ebo_26_1_261219.ScanId;v=1;d1=25368.25368.4	controllerType=0 controllerNumber=1 scan=25368	53.2972
34768:4	1	S.MPLPPHPGHPGYINFS[+79.966]YEVLTPLKWYQ.S		S[+80]	816.151	4	3261.58	3261.56	0	5.3	17	Non	319.56	319.56	68.33	5.88	1206	>sp|P02817|AMELX_BOVIN Amelogenin, X isoform OS=Bos taurus OX=9913 GN=AMELX PE=1 SV=2	1	hf1_10472_ebo_26_1_261219.ScanId;v=1;d1=25756.25756.4	controllerType=0 controllerNumber=1 scan=25756	53.9992
34484:4	1	S.MPLPPHPGHPGYINFS[+79.966]YEVLTPLKWYQ.S		S[+80]	816.152	4	3261.59	3261.56	0	6.8	17	Non	338.68	338.68	99.69	6.12	1206	>sp|P02817|AMELX_BOVIN Amelogenin, X isoform OS=Bos taurus OX=9913 GN=AMELX PE=1 SV=2	1	hf1_10472_ebo_26_1_261219.ScanId;v=1;d1=25559.25559.4	controllerType=0 controllerNumber=1 scan=25559	53.6441
34616:3	1	S.MPLPPHPGHPGYINFS[+79.966]YEVLTPLKWYQ.S		S[+80]	1087.87	3	3261.59	3261.56	0	7.6	17	Non	911.51	911.51	377.58	16.07	1206	>sp|P02817|AMELX_BOVIN Amelogenin, X isoform OS=Bos taurus OX=9913 GN=AMELX PE=1 SV=2	1	hf1_10472_ebo_26_1_261219.ScanId;v=1;d1=25653.25653.3	controllerType=0 controllerNumber=1 scan=25653	53.8104
34333:3	1	S.MPLPPHPGHPGYINFS[+79.966]YEVLTPLKWYQ.S		S[+80]	1087.87	3	3261.58	3261.56	0	6.6	17	Non	1007.99	1007.99	440.22	18.07	1206	>sp|P02817|AMELX_BOVIN Amelogenin, X isoform OS=Bos taurus OX=9913 GN=AMELX PE=1 SV=2	1	hf1_10472_ebo_26_1_261219.ScanId;v=1;d1=25452.25452.3	controllerType=0 controllerNumber=1 scan=25452	53.4507
35055:4	1	S.MPLPPHPGHPGYINFS[+79.966]YEVLTPLKWYQ[+0.984].S		Q[+1], S[+80]	816.399	4	3262.57	3262.55	0	7.8	17	Non	135.15	135.15	28.81	2.86	1206	>sp|P02817|AMELX_BOVIN Amelogenin, X isoform OS=Bos taurus OX=9913 GN=AMELX PE=1 SV=2	1	hf1_10472_ebo_26_1_261219.ScanId;v=1;d1=25950.25950.4	controllerType=0 controllerNumber=1 scan=25950	54.3556
33610:4	1	S.MPLPPHPGHP[+15.995]GYINFS[+79.966]YEVLTPLKWYQ.S		P[+16], S[+80]	820.149	4	3277.57	3277.56	0	4.3	17	Non	161.45	161.45	0	3.63	1206	>sp|P02817|AMELX_BOVIN Amelogenin, X isoform OS=Bos taurus OX=9913 GN=AMELX PE=1 SV=2	1	hf1_10472_ebo_26_1_261219.ScanId;v=1;d1=24954.24954.4	controllerType=0 controllerNumber=1 scan=24954	52.5608
34169:3	1	S.MP[+15.995]LPPHPGHPGYINFS[+79.966]YEVLTPLKWYQ.S		P[+16], S[+80]	1093.19	3	3277.57	3277.56	0	2.9	17	Non	178.58	178.58	3.8	3.2	1206	>sp|P02817|AMELX_BOVIN Amelogenin, X isoform OS=Bos taurus OX=9913 GN=AMELX PE=1 SV=2	1	hf1_10472_ebo_26_1_261219.ScanId;v=1;d1=25340.25340.3	controllerType=0 controllerNumber=1 scan=25340	53.2492
33901:4	1	S.MP[+15.995]LPPHPGHPGYINFS[+79.966]YEVLTPLKWYQ.S		P[+16], S[+80]	820.149	4	3277.57	3277.56	0	4.6	17	Non	225.77	225.77	0.16	4.34	1206	>sp|P02817|AMELX_BOVIN Amelogenin, X isoform OS=Bos taurus OX=9913 GN=AMELX PE=1 SV=2	1	hf1_10472_ebo_26_1_261219.ScanId;v=1;d1=25155.25155.4	controllerType=0 controllerNumber=1 scan=25155	52.9141
33314:4	1	S.M[+15.995]PLPPHPGHPGYINFS[+79.966]YEVLTPLKWYQ.S		M[+16], S[+80]	820.151	4	3277.58	3277.56	0	6.9	17	Non	253.66	253.66	13.07	5.62	1206	>sp|P02817|AMELX_BOVIN Amelogenin, X isoform OS=Bos taurus OX=9913 GN=AMELX PE=1 SV=2	1	hf1_10472_ebo_26_1_261219.ScanId;v=1;d1=24755.24755.4	controllerType=0 controllerNumber=1 scan=24755	52.2051
33009:4	1	S.MP[+15.995]LPPHPGHPGYINFS[+79.966]YEVLTPLKWYQ.S		P[+16], S[+80]	820.15	4	3277.58	3277.56	0	5.9	17	Non	304.71	304.71	5.8	5.88	1206	>sp|P02817|AMELX_BOVIN Amelogenin, X isoform OS=Bos taurus OX=9913 GN=AMELX PE=1 SV=2	1	hf1_10472_ebo_26_1_261219.ScanId;v=1;d1=24552.24552.4	controllerType=0 controllerNumber=1 scan=24552	51.8446
32995:3	1	S.MP[+15.995]LPPHPGHPGYINFS[+79.966]YEVLTPLKWYQ.S		P[+16], S[+80]	1093.2	3	3277.58	3277.56	0	7	17	Non	573.84	573.84	5.8	9.07	1206	>sp|P02817|AMELX_BOVIN Amelogenin, X isoform OS=Bos taurus OX=9913 GN=AMELX PE=1 SV=2	1	hf1_10472_ebo_26_1_261219.ScanId;v=1;d1=24542.24542.3	controllerType=0 controllerNumber=1 scan=24542	51.8273
33875:3	1	S.M[+15.995]PLPPHPGHPGYINFS[+79.966]YEVLTPLKWYQ.S		M[+16], S[+80]	1093.19	3	3277.57	3277.56	0	3.6	17	Non	632.64	632.64	8.17	9.6	1206	>sp|P02817|AMELX_BOVIN Amelogenin, X isoform OS=Bos taurus OX=9913 GN=AMELX PE=1 SV=2	1	hf1_10472_ebo_26_1_261219.ScanId;v=1;d1=25138.25138.3	controllerType=0 controllerNumber=1 scan=25138	52.8864
33290:3	1	S.MP[+15.995]LPPHPGHPGYINFS[+79.966]YEVLTPLKWYQ.S		P[+16], S[+80]	1093.2	3	3277.58	3277.56	0	6.6	17	Non	711.18	711.18	5.8	12.07	1206	>sp|P02817|AMELX_BOVIN Amelogenin, X isoform OS=Bos taurus OX=9913 GN=AMELX PE=1 SV=2	1	hf1_10472_ebo_26_1_261219.ScanId;v=1;d1=24740.24740.3	controllerType=0 controllerNumber=1 scan=24740	52.1808
35190:3	1	S.MPLPPHPGHPGYIN[+0.984]FS[+79.966]YEVLTPLKWYQ.S		N[+1], S[+80]	1088.2	3	3262.58	3262.55	0	8.6	17	Non	768.77	768.77	34.34	12.75	1206	>sp|P02817|AMELX_BOVIN Amelogenin, X isoform OS=Bos taurus OX=9913 GN=AMELX PE=1 SV=2	1	hf1_10472_ebo_26_1_261219.ScanId;v=1;d1=26038.26038.3	controllerType=0 controllerNumber=1 scan=26038	54.5099
31689:4	1	S.M[+15.995]PLPPHPGHPGYINFS[+79.966]YEVLTPLKW[+15.995]YQ.S		M[+16], S[+80], W[+16]	824.147	4	3293.57	3293.55	0	3.8	17	Non	96.32	96.32	0	1.87	1206	>sp|P02817|AMELX_BOVIN Amelogenin, X isoform OS=Bos taurus OX=9913 GN=AMELX PE=1 SV=2	1	hf1_10472_ebo_26_1_261219.ScanId;v=1;d1=23687.23687.4	controllerType=0 controllerNumber=1 scan=23687	50.3232
31707:4	1	S.MP[+15.995]LPPHPGHPGYINFS[+79.966]YEVLTPLKW[+15.995]YQ.S		P[+16], S[+80], W[+16]	824.151	4	3293.58	3293.55	0	8.7	17	Non	114.93	114.93	5.8	2.16	1206	>sp|P02817|AMELX_BOVIN Amelogenin, X isoform OS=Bos taurus OX=9913 GN=AMELX PE=1 SV=2	1	hf1_10472_ebo_26_1_261219.ScanId;v=1;d1=23699.23699.5	controllerType=0 controllerNumber=1 scan=23699	50.3437
33902:4	1	S.MP[+15.995]LPPHPGHPGYIN[+0.984]FS[+79.966]YEVLTPLKWYQ.S		N[+1], P[+16], S[+80]	820.398	4	3278.57	3278.54	0	8.5	17	Non	174.59	149.88	5.8	2.62	1206	>sp|P02817|AMELX_BOVIN Amelogenin, X isoform OS=Bos taurus OX=9913 GN=AMELX PE=1 SV=2	1	hf1_10472_ebo_26_1_261219.ScanId;v=1;d1=25155.25155.4	controllerType=0 controllerNumber=1 scan=25155	52.9141
32392:4	1	S.MP[+15.995]LPPHPGHPGYINFS[+79.966]YEVLTPLKW[+31.990]YQ.S		P[+16], S[+80], W[+32]	828.148	4	3309.57	3309.55	0	6.6	17	Non	228.38	228.38	5.8	3.95	1206	>sp|P02817|AMELX_BOVIN Amelogenin, X isoform OS=Bos taurus OX=9913 GN=AMELX PE=1 SV=2	1	hf1_10472_ebo_26_1_261219.ScanId;v=1;d1=24148.24148.4	controllerType=0 controllerNumber=1 scan=24148	51.1311
32368:3	1	S.MP[+15.995]LPPHPGHPGYINFS[+79.966]YEVLTPLKW[+31.990]YQ.S		P[+16], S[+80], W[+32]	1103.86	3	3309.57	3309.55	0	7.3	17	Non	266.58	266.58	4	5.69	1206	>sp|P02817|AMELX_BOVIN Amelogenin, X isoform OS=Bos taurus OX=9913 GN=AMELX PE=1 SV=2	1	hf1_10472_ebo_26_1_261219.ScanId;v=1;d1=24132.24132.3	controllerType=0 controllerNumber=1 scan=24132	51.1029
33876:3	1	S.M[+15.995]PLPPHPGHPGYIN[+0.984]FS[+79.966]YEVLTPLKWYQ.S		M[+16], N[+1], S[+80]	1093.53	3	3278.57	3278.54	0	7.9	17	Non	557.21	557.21	4.81	7.56	1206	>sp|P02817|AMELX_BOVIN Amelogenin, X isoform OS=Bos taurus OX=9913 GN=AMELX PE=1 SV=2	1	hf1_10472_ebo_26_1_261219.ScanId;v=1;d1=25138.25138.3	controllerType=0 controllerNumber=1 scan=25138	52.8864
46242:4	1	S.MP[+15.995]LPPHPGHPGY[+31.990]INF[+15.995]SY[+31.990]EVLTPLKWYQ.S		F[+16], P[+16], Y[+32]*2	820.152	4	3277.58	3277.57	0	5.6	17	Non	82.51	82.51	0	2.19	1206	>sp|P02817|AMELX_BOVIN Amelogenin, X isoform OS=Bos taurus OX=9913 GN=AMELX PE=1 SV=2	1	hf1_10472_ebo_26_1_261219.ScanId;v=1;d1=34387.34387.4	controllerType=0 controllerNumber=1 scan=34387	73.6184
32375:4	1	S.MPLPPHPGHPGYINFSYEVLTPLKWYQS.M			817.917	4	3268.65	3268.63	0	5.4	17	Non	440.56	423.9	423.9	7.4	1206	>sp|P02817|AMELX_BOVIN Amelogenin, X isoform OS=Bos taurus OX=9913 GN=AMELX PE=1 SV=2	1	hf1_10472_ebo_26_1_261219.ScanId;v=1;d1=24136.24136.4	controllerType=0 controllerNumber=1 scan=24136	51.1081
34014:5	1	S.MPLPPHPGHPGYINFS[+79.966]YEVLTPLKWYQS.M		S[+80]	670.529	5	3348.62	3348.6	0	7	17	Non	137.38	137.38	9.04	2.51	1206	>sp|P02817|AMELX_BOVIN Amelogenin, X isoform OS=Bos taurus OX=9913 GN=AMELX PE=1 SV=2	1	hf1_10472_ebo_26_1_261219.ScanId;v=1;d1=25231.25231.5	controllerType=0 controllerNumber=1 scan=25231	53.0493
31354:4	1	S.MP[+15.995]LPPHPGHPGYINFSYEVLTPLKWYQS.M		P[+16]	821.916	4	3284.64	3284.62	0	5.2	17	Non	248.81	225.58	12	5.2	1206	>sp|P02817|AMELX_BOVIN Amelogenin, X isoform OS=Bos taurus OX=9913 GN=AMELX PE=1 SV=2	1	hf1_10472_ebo_26_1_261219.ScanId;v=1;d1=23472.23472.4	controllerType=0 controllerNumber=1 scan=23472	49.9427
34298:5	1	S.MPLPPHPGHPGYINFS[+79.966]YEVLTPLKWYQS.M		S[+80]	670.529	5	3348.61	3348.6	0	5.8	17	Non	257.99	257.99	42.69	4.65	1206	>sp|P02817|AMELX_BOVIN Amelogenin, X isoform OS=Bos taurus OX=9913 GN=AMELX PE=1 SV=2	1	hf1_10472_ebo_26_1_261219.ScanId;v=1;d1=25427.25427.5	controllerType=0 controllerNumber=1 scan=25427	53.4054
34671:4	1	S.MPLPPHPGHPGYINFS[+79.966]YEVLTPLKWYQS.M		S[+80]	837.908	4	3348.61	3348.6	0	4.9	17	Non	304.12	304.12	29.07	5.88	1206	>sp|P02817|AMELX_BOVIN Amelogenin, X isoform OS=Bos taurus OX=9913 GN=AMELX PE=1 SV=2	1	hf1_10472_ebo_26_1_261219.ScanId;v=1;d1=25691.25691.4	controllerType=0 controllerNumber=1 scan=25691	53.8801
46195:4	1	S.MPLPPHPGHPGYINFS[+79.966]YEVLTPLKWYQS.M		S[+80]	837.91	4	3348.62	3348.6	0	6.6	17	Non	334.96	334.96	29.53	6.12	1206	>sp|P02817|AMELX_BOVIN Amelogenin, X isoform OS=Bos taurus OX=9913 GN=AMELX PE=1 SV=2	1	hf1_10472_ebo_26_1_261219.ScanId;v=1;d1=34352.34352.4	controllerType=0 controllerNumber=1 scan=34352	73.5571
34128:4	1	S.MPLPPHPGHPGYINFS[+79.966]YEVLTPLKWYQS.M		S[+80]	837.91	4	3348.62	3348.6	0	6.4	17	Non	380.16	380.16	86.67	7.25	1206	>sp|P02817|AMELX_BOVIN Amelogenin, X isoform OS=Bos taurus OX=9913 GN=AMELX PE=1 SV=2	1	hf1_10472_ebo_26_1_261219.ScanId;v=1;d1=25311.25311.4	controllerType=0 controllerNumber=1 scan=25311	53.1974
34402:4	1	S.MPLPPHPGHPGYINFS[+79.966]YEVLTPLKWYQS.M		S[+80]	837.909	4	3348.62	3348.6	0	6.1	17	Non	386.59	386.59	51.31	7.25	1206	>sp|P02817|AMELX_BOVIN Amelogenin, X isoform OS=Bos taurus OX=9913 GN=AMELX PE=1 SV=2	1	hf1_10472_ebo_26_1_261219.ScanId;v=1;d1=25502.25502.4	controllerType=0 controllerNumber=1 scan=25502	53.5429
34843:3	1	S.MPLPPHPGHPGYINFS[+79.966]YEVLTPLKWYQS.M		S[+80]	1116.87	3	3348.61	3348.6	0	4	17	Non	898.16	898.16	213.54	14.6	1206	>sp|P02817|AMELX_BOVIN Amelogenin, X isoform OS=Bos taurus OX=9913 GN=AMELX PE=1 SV=2	1	hf1_10472_ebo_26_1_261219.ScanId;v=1;d1=25805.25805.3	controllerType=0 controllerNumber=1 scan=25805	54.0871
34569:3	1	S.MPLPPHPGHPGYINFS[+79.966]YEVLTPLKWYQS.M		S[+80]	1116.88	3	3348.62	3348.6	0	7.6	17	Non	968.96	968.96	262.93	17.07	1206	>sp|P02817|AMELX_BOVIN Amelogenin, X isoform OS=Bos taurus OX=9913 GN=AMELX PE=1 SV=2	1	hf1_10472_ebo_26_1_261219.ScanId;v=1;d1=25618.25618.3	controllerType=0 controllerNumber=1 scan=25618	53.7498
34297:3	1	S.MPLPPHPGHPGYINFS[+79.966]YEVLTPLKWYQS.M		S[+80]	1116.88	3	3348.62	3348.6	0	6	17	Non	1049.96	1049.96	283.92	18.02	1206	>sp|P02817|AMELX_BOVIN Amelogenin, X isoform OS=Bos taurus OX=9913 GN=AMELX PE=1 SV=2	1	hf1_10472_ebo_26_1_261219.ScanId;v=1;d1=25426.25426.3	controllerType=0 controllerNumber=1 scan=25426	53.4039
34021:3	1	S.MPLPPHPGHPGYINFS[+79.966]YEVLTPLKWYQS.M		S[+80]	1116.88	3	3348.62	3348.6	0	7.1	17	Non	1053.68	1053.68	274.57	19.07	1206	>sp|P02817|AMELX_BOVIN Amelogenin, X isoform OS=Bos taurus OX=9913 GN=AMELX PE=1 SV=2	1	hf1_10472_ebo_26_1_261219.ScanId;v=1;d1=25237.25237.3	controllerType=0 controllerNumber=1 scan=25237	53.0608
38707:4	1	S.MPLPPHPGHPGYINF[+31.990]SY[+15.995]EVLTPLKWYQS.M		F[+32], Y[+16]	829.914	4	3316.63	3316.61	0	6.2	17	Non	54	54	5.62	2.17	1206	>sp|P02817|AMELX_BOVIN Amelogenin, X isoform OS=Bos taurus OX=9913 GN=AMELX PE=1 SV=2	1	hf1_10472_ebo_26_1_261219.ScanId;v=1;d1=28355.28355.6	controllerType=0 controllerNumber=1 scan=28355	58.651
34714:3	1	S.MP[+15.995]LPPHPGHPGYINFS[+79.966]YEVLTPLKWYQS.M		P[+16], S[+80]	1122.21	3	3364.61	3364.59	0	7	17	Non	69.6	69.6	4.08	2.17	1206	>sp|P02817|AMELX_BOVIN Amelogenin, X isoform OS=Bos taurus OX=9913 GN=AMELX PE=1 SV=2	1	hf1_10472_ebo_26_1_261219.ScanId;v=1;d1=25719.25719.3	controllerType=0 controllerNumber=1 scan=25719	53.9336
35838:3	1	S.MPLPPHPGHPGYINFS[+79.966]YEVLTPLKWYQ[+0.984]S.M		Q[+1], S[+80]	1117.2	3	3349.6	3349.58	0	5.3	17	Non	80.24	80.24	45.99	2.16	1206	>sp|P02817|AMELX_BOVIN Amelogenin, X isoform OS=Bos taurus OX=9913 GN=AMELX PE=1 SV=2	1	hf1_10472_ebo_26_1_261219.ScanId;v=1;d1=26471.26471.3	controllerType=0 controllerNumber=1 scan=26471	55.2814
31314:4	1	S.MPLPPHPGHPGYINFS[+79.966]YEVLTPLK[+15.995]WYQS.M		K[+16], S[+80]	841.91	4	3364.62	3364.59	0	8.5	17	Non	81.41	81.41	0	2.16	1206	>sp|P02817|AMELX_BOVIN Amelogenin, X isoform OS=Bos taurus OX=9913 GN=AMELX PE=1 SV=2	1	hf1_10472_ebo_26_1_261219.ScanId;v=1;d1=23446.23446.4	controllerType=0 controllerNumber=1 scan=23446	49.8978
35427:4	1	S.MPLPPHPGHPGYINFSYEVLTPLKW[+31.990]Y[+31.990]QS.M		W[+32], Y[+32]	833.911	4	3332.62	3332.61	0	3.8	17	Non	92.83	57.66	4.82	1.54	1206	>sp|P02817|AMELX_BOVIN Amelogenin, X isoform OS=Bos taurus OX=9913 GN=AMELX PE=1 SV=2	1	hf1_10472_ebo_26_1_261219.ScanId;v=1;d1=26200.26200.4	controllerType=0 controllerNumber=1 scan=26200	54.7979
33305:4	1	S.MPLPPHPGHPGYINFS[+79.966]YEVLTP[+31.990]LKWYQS.M		P[+32], S[+80]	845.908	4	3380.61	3380.59	0	7.4	17	Non	97.39	70.18	5.07	2.17	1206	>sp|P02817|AMELX_BOVIN Amelogenin, X isoform OS=Bos taurus OX=9913 GN=AMELX PE=1 SV=2	1	hf1_10472_ebo_26_1_261219.ScanId;v=1;d1=24749.24749.4	controllerType=0 controllerNumber=1 scan=24749	52.1972
32411:3	1	S.MPLPPHPGHPGYINFS[+79.966]YEVLTPLK[+15.995]WYQS.M		K[+16], S[+80]	1122.21	3	3364.61	3364.59	0	6.1	17	Non	126.8	126.8	0	2.8	1206	>sp|P02817|AMELX_BOVIN Amelogenin, X isoform OS=Bos taurus OX=9913 GN=AMELX PE=1 SV=2	1	hf1_10472_ebo_26_1_261219.ScanId;v=1;d1=24161.24161.3	controllerType=0 controllerNumber=1 scan=24161	51.1529
32945:5	1	S.MP[+15.995]LPPHPGHPGYINFS[+79.966]YEVLTPLKWYQS.M		P[+16], S[+80]	673.727	5	3364.61	3364.59	0	4.8	17	Non	138.36	138.36	5.8	2.29	1206	>sp|P02817|AMELX_BOVIN Amelogenin, X isoform OS=Bos taurus OX=9913 GN=AMELX PE=1 SV=2	1	hf1_10472_ebo_26_1_261219.ScanId;v=1;d1=24508.24508.5	controllerType=0 controllerNumber=1 scan=24508	51.7678
33547:3	1	S.MPLPPHPGHPGYINFS[+79.966]YEVLTP[+31.990]LKWYQS.M		P[+32], S[+80]	1127.54	3	3380.61	3380.59	0	6	17	Non	142.06	142.06	0.87	2.8	1206	>sp|P02817|AMELX_BOVIN Amelogenin, X isoform OS=Bos taurus OX=9913 GN=AMELX PE=1 SV=2	1	hf1_10472_ebo_26_1_261219.ScanId;v=1;d1=24913.24913.3	controllerType=0 controllerNumber=1 scan=24913	52.489
34526:4	1	S.MPLPPHP[+15.995]GHPGYINFS[+79.966]YEVLTPLKWYQS.M		P[+16], S[+80]	841.908	4	3364.61	3364.59	0	5.9	17	Non	225.33	225.33	8.77	4.34	1206	>sp|P02817|AMELX_BOVIN Amelogenin, X isoform OS=Bos taurus OX=9913 GN=AMELX PE=1 SV=2	1	hf1_10472_ebo_26_1_261219.ScanId;v=1;d1=25587.25587.4	controllerType=0 controllerNumber=1 scan=25587	53.6919
34672:4	1	S.MPLPPHPGHPGYINFS[+79.966]YEVLTPLKWYQ[+0.984]S.M		Q[+1], S[+80]	838.158	4	3349.61	3349.58	0	9.7	17	Non	257.91	257.91	42.53	5.11	1206	>sp|P02817|AMELX_BOVIN Amelogenin, X isoform OS=Bos taurus OX=9913 GN=AMELX PE=1 SV=2	1	hf1_10472_ebo_26_1_261219.ScanId;v=1;d1=25691.25691.4	controllerType=0 controllerNumber=1 scan=25691	53.8801
34958:4	1	S.MPLPPHPGHPGYIN[+0.984]FS[+79.966]YEVLTPLKWYQS.M		N[+1], S[+80]	838.157	4	3349.61	3349.58	0	7.8	17	Non	293.09	293.09	18.84	5.93	1206	>sp|P02817|AMELX_BOVIN Amelogenin, X isoform OS=Bos taurus OX=9913 GN=AMELX PE=1 SV=2	1	hf1_10472_ebo_26_1_261219.ScanId;v=1;d1=25882.25882.4	controllerType=0 controllerNumber=1 scan=25882	54.2286
33067:4	1	S.MP[+15.995]LPPHPGHPGYINFS[+79.966]YEVLTPLKWYQS.M		P[+16], S[+80]	841.908	4	3364.61	3364.59	0	5.8	17	Non	294.6	294.6	4	5.98	1206	>sp|P02817|AMELX_BOVIN Amelogenin, X isoform OS=Bos taurus OX=9913 GN=AMELX PE=1 SV=2	1	hf1_10472_ebo_26_1_261219.ScanId;v=1;d1=24593.24593.4	controllerType=0 controllerNumber=1 scan=24593	51.9153
34150:3	1	S.MPLPPHPGH[+15.995]PGYINFS[+79.966]YEVLTPLKWYQS.M		H[+16], S[+80]	1122.2	3	3364.59	3364.59	0	1.3	17	Non	307.92	307.92	1.69	4.9	1206	>sp|P02817|AMELX_BOVIN Amelogenin, X isoform OS=Bos taurus OX=9913 GN=AMELX PE=1 SV=2	1	hf1_10472_ebo_26_1_261219.ScanId;v=1;d1=25329.25329.3	controllerType=0 controllerNumber=1 scan=25329	53.2301
33953:4	1	S.MPLPPHPGHPGY[+15.995]INFS[+79.966]YEVLTPLKWYQS.M		S[+80], Y[+16]	841.907	4	3364.6	3364.59	0	4.3	17	Non	340.96	340.96	13.88	5.98	1206	>sp|P02817|AMELX_BOVIN Amelogenin, X isoform OS=Bos taurus OX=9913 GN=AMELX PE=1 SV=2	1	hf1_10472_ebo_26_1_261219.ScanId;v=1;d1=25191.25191.4	controllerType=0 controllerNumber=1 scan=25191	52.9811
35405:3	1	S.MPLPPHPGHPGYIN[+0.984]FS[+79.966]YEVLTPLKWYQS.M		N[+1], S[+80]	1117.2	3	3349.59	3349.58	0	2.6	17	Non	428.69	428.69	83.75	6.56	1206	>sp|P02817|AMELX_BOVIN Amelogenin, X isoform OS=Bos taurus OX=9913 GN=AMELX PE=1 SV=2	1	hf1_10472_ebo_26_1_261219.ScanId;v=1;d1=26186.26186.3	controllerType=0 controllerNumber=1 scan=26186	54.7739
32722:3	1	S.MPLPPHPGHPGYINFS[+79.966]YEVLTPLKWY[+15.995]QS.M		S[+80], Y[+16]	1122.21	3	3364.61	3364.59	0	7	17	Non	456.11	456.11	0	7.3	1206	>sp|P02817|AMELX_BOVIN Amelogenin, X isoform OS=Bos taurus OX=9913 GN=AMELX PE=1 SV=2	1	hf1_10472_ebo_26_1_261219.ScanId;v=1;d1=24357.24357.3	controllerType=0 controllerNumber=1 scan=24357	51.5008
33583:3	1	S.M[+15.995]PLPPHPGHPGYINFS[+79.966]YEVLTPLKWYQS.M		M[+16], S[+80]	1122.2	3	3364.59	3364.59	0	-0.1	17	Non	609.63	609.63	7.75	8.49	1206	>sp|P02817|AMELX_BOVIN Amelogenin, X isoform OS=Bos taurus OX=9913 GN=AMELX PE=1 SV=2	1	hf1_10472_ebo_26_1_261219.ScanId;v=1;d1=24936.24936.3	controllerType=0 controllerNumber=1 scan=24936	52.5293
35118:3	1	S.MPLPPHPGHPGYIN[+0.984]FS[+79.966]YEVLTPLKWYQS.M		N[+1], S[+80]	1117.21	3	3349.6	3349.58	0	6.4	17	Non	662.58	662.58	159.45	11.07	1206	>sp|P02817|AMELX_BOVIN Amelogenin, X isoform OS=Bos taurus OX=9913 GN=AMELX PE=1 SV=2	1	hf1_10472_ebo_26_1_261219.ScanId;v=1;d1=25992.25992.3	controllerType=0 controllerNumber=1 scan=25992	54.4304
33289:3	1	S.MP[+15.995]LPPHPGHPGYINFS[+79.966]YEVLTPLKWYQS.M		P[+16], S[+80]	1122.21	3	3364.61	3364.59	0	6.5	17	Non	694.53	694.53	5.8	11.07	1206	>sp|P02817|AMELX_BOVIN Amelogenin, X isoform OS=Bos taurus OX=9913 GN=AMELX PE=1 SV=2	1	hf1_10472_ebo_26_1_261219.ScanId;v=1;d1=24739.24739.3	controllerType=0 controllerNumber=1 scan=24739	52.1793
33872:3	1	S.M[+15.995]PLPPHPGHPGYINFS[+79.966]YEVLTPLKWYQS.M		M[+16], S[+80]	1122.21	3	3364.6	3364.59	0	4.3	17	Non	800.87	800.87	3.58	14.02	1206	>sp|P02817|AMELX_BOVIN Amelogenin, X isoform OS=Bos taurus OX=9913 GN=AMELX PE=1 SV=2	1	hf1_10472_ebo_26_1_261219.ScanId;v=1;d1=25136.25136.3	controllerType=0 controllerNumber=1 scan=25136	52.8833
34844:3	1	S.MPLPPHPGHPGYINFS[+79.966]YEVLTPLKWYQ[+0.984]S.M		Q[+1], S[+80]	1117.21	3	3349.61	3349.58	0	8	17	Non	877.03	877.03	75.22	15.07	1206	>sp|P02817|AMELX_BOVIN Amelogenin, X isoform OS=Bos taurus OX=9913 GN=AMELX PE=1 SV=2	1	hf1_10472_ebo_26_1_261219.ScanId;v=1;d1=25805.25805.3	controllerType=0 controllerNumber=1 scan=25805	54.0871
33006:3	1	S.M[+15.995]PLPPHPGHPGYINFS[+79.966]YEVLTPLKWYQS.M		M[+16], S[+80]	1122.21	3	3364.61	3364.59	0	5.9	17	Non	993.04	993.04	8.92	17.02	1206	>sp|P02817|AMELX_BOVIN Amelogenin, X isoform OS=Bos taurus OX=9913 GN=AMELX PE=1 SV=2	1	hf1_10472_ebo_26_1_261219.ScanId;v=1;d1=24549.24549.3	controllerType=0 controllerNumber=1 scan=24549	51.8406
33548:3	1	S.MPLPPHPGHPGYIN[+0.984]FS[+79.966]YEVLTPLKWY[+31.990]QS.M		N[+1], S[+80], Y[+32]	1127.87	3	3381.59	3381.57	0	7.6	17	Non	39.8	39.8	0	2.17	1206	>sp|P02817|AMELX_BOVIN Amelogenin, X isoform OS=Bos taurus OX=9913 GN=AMELX PE=1 SV=2	1	hf1_10472_ebo_26_1_261219.ScanId;v=1;d1=24913.24913.3	controllerType=0 controllerNumber=1 scan=24913	52.489
32880:3	1	S.MP[+15.995]LPPHPGHP[+15.995]GYINFS[+79.966]YEVLTPLKWYQS.M		P[+16]*2, S[+80]	1127.54	3	3380.6	3380.59	0	5.8	17	Non	110.96	110.96	5.8	2.19	1206	>sp|P02817|AMELX_BOVIN Amelogenin, X isoform OS=Bos taurus OX=9913 GN=AMELX PE=1 SV=2	1	hf1_10472_ebo_26_1_261219.ScanId;v=1;d1=24464.24464.3	controllerType=0 controllerNumber=1 scan=24464	51.6876
31130:3	1	S.MP[+15.995]LPPHPGHPGYINFS[+79.966]YEVLTPLKW[+15.995]YQS.M		P[+16], S[+80], W[+16]	1127.54	3	3380.6	3380.59	0	5.1	17	Non	116.85	116.85	4	2.59	1206	>sp|P02817|AMELX_BOVIN Amelogenin, X isoform OS=Bos taurus OX=9913 GN=AMELX PE=1 SV=2	1	hf1_10472_ebo_26_1_261219.ScanId;v=1;d1=23325.23325.3	controllerType=0 controllerNumber=1 scan=23325	49.6845
32507:4	1	S.MP[+15.995]LPPHPGHPGY[+15.995]INFS[+79.966]YEVLTPLKWYQS.M		P[+16], S[+80], Y[+16]	845.908	4	3380.61	3380.59	0	7.3	17	Non	132.91	132.91	2.47	2.26	1206	>sp|P02817|AMELX_BOVIN Amelogenin, X isoform OS=Bos taurus OX=9913 GN=AMELX PE=1 SV=2	1	hf1_10472_ebo_26_1_261219.ScanId;v=1;d1=24217.24217.4	controllerType=0 controllerNumber=1 scan=24217	51.2508
30505:3	1	S.M[+15.995]PLPPHPGHPGYINFS[+79.966]YEVLTPLKW[+15.995]YQS.M		M[+16], S[+80], W[+16]	1127.54	3	3380.6	3380.59	0	5.7	17	Non	149.59	149.59	11.3	3.18	1206	>sp|P02817|AMELX_BOVIN Amelogenin, X isoform OS=Bos taurus OX=9913 GN=AMELX PE=1 SV=2	1	hf1_10472_ebo_26_1_261219.ScanId;v=1;d1=22908.22908.3	controllerType=0 controllerNumber=1 scan=22908	48.9452
34527:4	1	S.MPLPPHP[+15.995]GHPGYIN[+0.984]FS[+79.966]YEVLTPLKWYQS.M		N[+1], P[+16], S[+80]	842.155	4	3365.6	3365.57	0	7.6	17	Non	151.33	151.33	12.49	2.26	1206	>sp|P02817|AMELX_BOVIN Amelogenin, X isoform OS=Bos taurus OX=9913 GN=AMELX PE=1 SV=2	1	hf1_10472_ebo_26_1_261219.ScanId;v=1;d1=25587.25587.4	controllerType=0 controllerNumber=1 scan=25587	53.6919
31730:3	1	S.M[+15.995]PLPPHPGHPGYINFS[+79.966]YEVLTPLK[+15.995]WYQS.M		K[+16], M[+16], S[+80]	1127.54	3	3380.6	3380.59	0	4.7	17	Non	190.35	190.35	0	4.23	1206	>sp|P02817|AMELX_BOVIN Amelogenin, X isoform OS=Bos taurus OX=9913 GN=AMELX PE=1 SV=2	1	hf1_10472_ebo_26_1_261219.ScanId;v=1;d1=23714.23714.3	controllerType=0 controllerNumber=1 scan=23714	50.3719
32218:4	1	S.MP[+15.995]LPPHPGHPGYINFS[+79.966]YEVLTPLKWY[+31.990]QS.M		P[+16], S[+80], Y[+32]	849.907	4	3396.61	3396.58	0	7.9	17	Non	197.77	156.28	0	2.86	1206	>sp|P02817|AMELX_BOVIN Amelogenin, X isoform OS=Bos taurus OX=9913 GN=AMELX PE=1 SV=2	1	hf1_10472_ebo_26_1_261219.ScanId;v=1;d1=24038.24038.4	controllerType=0 controllerNumber=1 scan=24038	50.9367
34237:4	1	S.MPLPPHPGHP[+15.995]GYIN[+0.984]FS[+79.966]YEVLTPLKWYQS.M		N[+1], P[+16], S[+80]	842.15	4	3365.58	3365.57	0	1.3	17	Non	201.17	166.65	5.78	2.77	1206	>sp|P02817|AMELX_BOVIN Amelogenin, X isoform OS=Bos taurus OX=9913 GN=AMELX PE=1 SV=2	1	hf1_10472_ebo_26_1_261219.ScanId;v=1;d1=25386.25386.4	controllerType=0 controllerNumber=1 scan=25386	53.33
34151:3	1	S.MPLPPHPGH[+15.995]PGYIN[+0.984]FS[+79.966]YEVLTPLKWYQS.M		H[+16], N[+1], S[+80]	1122.54	3	3365.6	3365.57	0	9.2	17	Non	219.15	172.95	1.01	3.76	1206	>sp|P02817|AMELX_BOVIN Amelogenin, X isoform OS=Bos taurus OX=9913 GN=AMELX PE=1 SV=2	1	hf1_10472_ebo_26_1_261219.ScanId;v=1;d1=25329.25329.3	controllerType=0 controllerNumber=1 scan=25329	53.2301
35533:4	1	S.MPLPPHPGHPGYIN[+0.984]FS[+79.966]YEVLTPLKWYQ[+0.984]S.M		N[+1], Q[+1], S[+80]	838.402	4	3350.59	3350.56	0	7.1	17	Non	231.53	201.88	174.68	4.39	1206	>sp|P02817|AMELX_BOVIN Amelogenin, X isoform OS=Bos taurus OX=9913 GN=AMELX PE=1 SV=2	1	hf1_10472_ebo_26_1_261219.ScanId;v=1;d1=26269.26269.4	controllerType=0 controllerNumber=1 scan=26269	54.9212
35406:3	1	S.MPLPPHPGHPGYIN[+0.984]FS[+79.966]YEVLTPLKWYQ[+0.984]S.M		N[+1], Q[+1], S[+80]	1117.53	3	3350.58	3350.56	0	5	17	Non	247.41	139.23	55.18	2.63	1206	>sp|P02817|AMELX_BOVIN Amelogenin, X isoform OS=Bos taurus OX=9913 GN=AMELX PE=1 SV=2	1	hf1_10472_ebo_26_1_261219.ScanId;v=1;d1=26186.26186.3	controllerType=0 controllerNumber=1 scan=26186	54.7739
31913:4	1	S.MP[+15.995]LPPHPGHPGYINFS[+79.966]YEVLTPLKWY[+31.990]QS.M		P[+16], S[+80], Y[+32]	849.905	4	3396.6	3396.58	0	5.9	17	Non	249.94	213.83	0	5.2	1206	>sp|P02817|AMELX_BOVIN Amelogenin, X isoform OS=Bos taurus OX=9913 GN=AMELX PE=1 SV=2	1	hf1_10472_ebo_26_1_261219.ScanId;v=1;d1=23839.23839.4	controllerType=0 controllerNumber=1 scan=23839	50.5884
29911:3	1	S.MP[+15.995]LPPHPGHPGYINFS[+79.966]YEVLTPLKWY[+15.995]QS.M		P[+16], S[+80], Y[+16]	1127.54	3	3380.6	3380.59	0	5.7	17	Non	271.94	271.94	0	5.64	1206	>sp|P02817|AMELX_BOVIN Amelogenin, X isoform OS=Bos taurus OX=9913 GN=AMELX PE=1 SV=2	1	hf1_10472_ebo_26_1_261219.ScanId;v=1;d1=22492.22492.3	controllerType=0 controllerNumber=1 scan=22492	48.2191
33656:4	1	S.MP[+15.995]LPPHPGHPGYINFS[+79.966]YEVLTPLKWYQ[+0.984]S.M		P[+16], Q[+1], S[+80]	842.155	4	3365.6	3365.57	0	6.6	17	Non	303.53	303.53	5.8	5.73	1206	>sp|P02817|AMELX_BOVIN Amelogenin, X isoform OS=Bos taurus OX=9913 GN=AMELX PE=1 SV=2	1	hf1_10472_ebo_26_1_261219.ScanId;v=1;d1=24986.24986.4	controllerType=0 controllerNumber=1 scan=24986	52.6171
33954:4	1	S.MPLPPHPGHPGY[+15.995]IN[+0.984]FS[+79.966]YEVLTPLKWYQS.M		N[+1], S[+80], Y[+16]	842.156	4	3365.6	3365.57	0	8.7	17	Non	324.16	297.29	11.46	5.4	1206	>sp|P02817|AMELX_BOVIN Amelogenin, X isoform OS=Bos taurus OX=9913 GN=AMELX PE=1 SV=2	1	hf1_10472_ebo_26_1_261219.ScanId;v=1;d1=25191.25191.4	controllerType=0 controllerNumber=1 scan=25191	52.9811
35713:3	1	S.MPLPPHPGHPGYIN[+0.984]FS[+79.966]YEVLTPLKWYQ[+0.984]S.M		N[+1], Q[+1], S[+80]	1117.53	3	3350.58	3350.56	0	5.5	17	Non	331.46	305.44	137.42	5.93	1206	>sp|P02817|AMELX_BOVIN Amelogenin, X isoform OS=Bos taurus OX=9913 GN=AMELX PE=1 SV=2	1	hf1_10472_ebo_26_1_261219.ScanId;v=1;d1=26391.26391.3	controllerType=0 controllerNumber=1 scan=26391	55.1408
32205:3	1	S.MP[+15.995]LPPHPGHPGYINFS[+79.966]YEVLTPLKWY[+31.990]QS.M		P[+16], S[+80], Y[+32]	1132.87	3	3396.61	3396.58	0	7.6	17	Non	415.66	415.66	0	7.03	1206	>sp|P02817|AMELX_BOVIN Amelogenin, X isoform OS=Bos taurus OX=9913 GN=AMELX PE=1 SV=2	1	hf1_10472_ebo_26_1_261219.ScanId;v=1;d1=24030.24030.4	controllerType=0 controllerNumber=1 scan=24030	50.9218
31427:3	1	S.M[+15.995]PLPPHPGHPGYINFS[+79.966]YEVLTPLKW[+15.995]YQS.M		M[+16], S[+80], W[+16]	1127.54	3	3380.6	3380.59	0	3.5	17	Non	419.77	419.77	7.5	6.88	1206	>sp|P02817|AMELX_BOVIN Amelogenin, X isoform OS=Bos taurus OX=9913 GN=AMELX PE=1 SV=2	1	hf1_10472_ebo_26_1_261219.ScanId;v=1;d1=23521.23521.3	controllerType=0 controllerNumber=1 scan=23521	50.0304
32574:3	1	S.M[+15.995]PLPPHPGHPGYINF[+15.995]S[+79.966]YEVLTPLKWYQS.M		F[+16], M[+16], S[+80]	1127.54	3	3380.61	3380.59	0	6	17	Non	473.28	473.28	7.78	8.07	1206	>sp|P02817|AMELX_BOVIN Amelogenin, X isoform OS=Bos taurus OX=9913 GN=AMELX PE=1 SV=2	1	hf1_10472_ebo_26_1_261219.ScanId;v=1;d1=24262.24262.3	controllerType=0 controllerNumber=1 scan=24262	51.3301
32010:3	1	S.M[+15.995]PLPPHPGHPGYINFS[+79.966]YEVLTPLKW[+31.990]YQS.M		M[+16], S[+80], W[+32]	1132.87	3	3396.6	3396.58	0	6.8	17	Non	743.59	743.59	0	12.07	1206	>sp|P02817|AMELX_BOVIN Amelogenin, X isoform OS=Bos taurus OX=9913 GN=AMELX PE=1 SV=2	1	hf1_10472_ebo_26_1_261219.ScanId;v=1;d1=23901.23901.3	controllerType=0 controllerNumber=1 scan=23901	50.6975
33873:3	1	S.M[+15.995]PLPPHPGHPGYIN[+0.984]FS[+79.966]YEVLTPLKWYQS.M		M[+16], N[+1], S[+80]	1122.54	3	3365.6	3365.57	0	8.3	17	Non	757.87	757.87	7.08	12.75	1206	>sp|P02817|AMELX_BOVIN Amelogenin, X isoform OS=Bos taurus OX=9913 GN=AMELX PE=1 SV=2	1	hf1_10472_ebo_26_1_261219.ScanId;v=1;d1=25136.25136.3	controllerType=0 controllerNumber=1 scan=25136	52.8833
32769:4	1	S.M[+15.995]PLPPHPGHPGYINF[+31.990]SY[+31.990]EVLTPLKW[+15.995]YQS.M		F[+32], M[+16], W[+16], Y[+32]	841.908	4	3364.61	3364.6	0	3.6	17	Non	156.77	156.77	1.46	2.17	1206	>sp|P02817|AMELX_BOVIN Amelogenin, X isoform OS=Bos taurus OX=9913 GN=AMELX PE=1 SV=2	1	hf1_10472_ebo_26_1_261219.ScanId;v=1;d1=24389.24389.4	controllerType=0 controllerNumber=1 scan=24389	51.5573
37256:5	1	S.MPLPPHPGHPGYINFS[+79.966]YEVLTPLKWYQSM.I		S[+80]	696.737	5	3479.65	3479.64	0	5.3	17	Non	120.81	120.81	1.02	2.29	1206	>sp|P02817|AMELX_BOVIN Amelogenin, X isoform OS=Bos taurus OX=9913 GN=AMELX PE=1 SV=2	1	hf1_10472_ebo_26_1_261219.ScanId;v=1;d1=27403.27403.5	controllerType=0 controllerNumber=1 scan=27403	56.9468
37699:3	1	S.MPLPPHPGHPGYINFS[+79.966]YEVLTPLKWYQSM.I		S[+80]	1160.56	3	3479.66	3479.64	0	6.9	17	Non	199.32	199.32	0.75	4.07	1206	>sp|P02817|AMELX_BOVIN Amelogenin, X isoform OS=Bos taurus OX=9913 GN=AMELX PE=1 SV=2	1	hf1_10472_ebo_26_1_261219.ScanId;v=1;d1=27692.27692.3	controllerType=0 controllerNumber=1 scan=27692	57.461
37112:4	1	S.MPLPPHPGHPGYINFS[+79.966]YEVLTPLKWYQSM.I		S[+80]	870.669	4	3479.66	3479.64	0	5.9	17	Non	411.79	411.79	73.13	7.23	1206	>sp|P02817|AMELX_BOVIN Amelogenin, X isoform OS=Bos taurus OX=9913 GN=AMELX PE=1 SV=2	1	hf1_10472_ebo_26_1_261219.ScanId;v=1;d1=27312.27312.4	controllerType=0 controllerNumber=1 scan=27312	56.7877
37703:4	1	S.MPLPPHPGHPGYINFS[+79.966]YEVLTPLKWYQSM.I		S[+80]	870.669	4	3479.65	3479.64	0	5.3	17	Non	425.91	425.91	109.54	7.23	1206	>sp|P02817|AMELX_BOVIN Amelogenin, X isoform OS=Bos taurus OX=9913 GN=AMELX PE=1 SV=2	1	hf1_10472_ebo_26_1_261219.ScanId;v=1;d1=27695.27695.4	controllerType=0 controllerNumber=1 scan=27695	57.4682
37420:4	1	S.MPLPPHPGHPGYINFS[+79.966]YEVLTPLKWYQSM.I		S[+80]	870.67	4	3479.66	3479.64	0	6.5	17	Non	431.9	431.9	73.34	7.27	1206	>sp|P02817|AMELX_BOVIN Amelogenin, X isoform OS=Bos taurus OX=9913 GN=AMELX PE=1 SV=2	1	hf1_10472_ebo_26_1_261219.ScanId;v=1;d1=27504.27504.4	controllerType=0 controllerNumber=1 scan=27504	57.1279
38010:3	1	S.MPLPPHPGHPGYINFS[+79.966]YEVLTPLKWYQSM.I		S[+80]	1160.56	3	3479.65	3479.64	0	4.3	17	Non	502.6	502.6	151.77	8.11	1206	>sp|P02817|AMELX_BOVIN Amelogenin, X isoform OS=Bos taurus OX=9913 GN=AMELX PE=1 SV=2	1	hf1_10472_ebo_26_1_261219.ScanId;v=1;d1=27897.27897.3	controllerType=0 controllerNumber=1 scan=27897	57.8313
37712:3	1	S.MPLPPHPGHPGYINFS[+79.966]YEVLTPLKWYQSM.I		S[+80]	1160.56	3	3479.66	3479.64	0	6.2	17	Non	922.2	922.2	346.74	16.07	1206	>sp|P02817|AMELX_BOVIN Amelogenin, X isoform OS=Bos taurus OX=9913 GN=AMELX PE=1 SV=2	1	hf1_10472_ebo_26_1_261219.ScanId;v=1;d1=27701.27701.3	controllerType=0 controllerNumber=1 scan=27701	57.4801
37102:3	1	S.MPLPPHPGHPGYINFS[+79.966]YEVLTPLKWYQSM.I		S[+80]	1160.56	3	3479.66	3479.64	0	6.6	17	Non	980.4	980.4	294.31	17.07	1206	>sp|P02817|AMELX_BOVIN Amelogenin, X isoform OS=Bos taurus OX=9913 GN=AMELX PE=1 SV=2	1	hf1_10472_ebo_26_1_261219.ScanId;v=1;d1=27305.27305.3	controllerType=0 controllerNumber=1 scan=27305	56.7746
37421:3	1	S.MPLPPHPGHPGYINFS[+79.966]YEVLTPLKWYQSM.I		S[+80]	1160.56	3	3479.66	3479.64	0	6.9	17	Non	1135.83	1135.83	335.61	20.07	1206	>sp|P02817|AMELX_BOVIN Amelogenin, X isoform OS=Bos taurus OX=9913 GN=AMELX PE=1 SV=2	1	hf1_10472_ebo_26_1_261219.ScanId;v=1;d1=27505.27505.3	controllerType=0 controllerNumber=1 scan=27505	57.1295
35340:3	1	S.MPLPPHPGHPGYINFS[+79.966]YEVLTPLKWY[+31.990]QSM.I		S[+80], Y[+32]	1171.22	3	3511.66	3511.63	0	8.6	17	Non	66.66	66.66	0	1.7	1206	>sp|P02817|AMELX_BOVIN Amelogenin, X isoform OS=Bos taurus OX=9913 GN=AMELX PE=1 SV=2	1	hf1_10472_ebo_26_1_261219.ScanId;v=1;d1=26140.26140.3	controllerType=0 controllerNumber=1 scan=26140	54.6905
31177:3	1	S.MPLPPHPGHPGYINFS[+79.966]YEVLTP[+31.990]LKWYQSM.I		P[+32], S[+80]	1171.22	3	3511.65	3511.63	0	7.7	17	Non	76.67	76.67	4.7	2.49	1206	>sp|P02817|AMELX_BOVIN Amelogenin, X isoform OS=Bos taurus OX=9913 GN=AMELX PE=1 SV=2	1	hf1_10472_ebo_26_1_261219.ScanId;v=1;d1=23356.23356.3	controllerType=0 controllerNumber=1 scan=23356	49.7394
35928:4	1	S.MPLPPHPGHPGYINFS[+79.966]Y[+31.990]EVLTPLKWYQSM.I		S[+80], Y[+32]	878.667	4	3511.65	3511.63	0	6.3	17	Non	176.74	176.74	6.34	3.67	1206	>sp|P02817|AMELX_BOVIN Amelogenin, X isoform OS=Bos taurus OX=9913 GN=AMELX PE=1 SV=2	1	hf1_10472_ebo_26_1_261219.ScanId;v=1;d1=26532.26532.4	controllerType=0 controllerNumber=1 scan=26532	55.3898
34099:5	1	S.MPLPPHPGHPGYINFS[+79.966]YEVLTPLKWYQSM[+15.995].I		M[+16], S[+80]	699.937	5	3495.65	3495.63	0	6.5	17	Non	194.08	194.08	36.82	2.82	1206	>sp|P02817|AMELX_BOVIN Amelogenin, X isoform OS=Bos taurus OX=9913 GN=AMELX PE=1 SV=2	1	hf1_10472_ebo_26_1_261219.ScanId;v=1;d1=25291.25291.5	controllerType=0 controllerNumber=1 scan=25291	53.1589
34377:5	1	S.MPLPPHPGHPGYINFS[+79.966]YEVLTPLKWYQSM[+15.995].I		M[+16], S[+80]	699.936	5	3495.65	3495.63	0	5.2	17	Non	219.07	219.07	20.38	3.43	1206	>sp|P02817|AMELX_BOVIN Amelogenin, X isoform OS=Bos taurus OX=9913 GN=AMELX PE=1 SV=2	1	hf1_10472_ebo_26_1_261219.ScanId;v=1;d1=25483.25483.5	controllerType=0 controllerNumber=1 scan=25483	53.5059
38912:3	1	S.MPLPPHPGHPGYINFS[+79.966]YEVLTPLKWYQ[+0.984]SM.I		Q[+1], S[+80]	1160.89	3	3480.65	3480.62	0	7.8	17	Non	308.8	308.8	70.02	5.99	1206	>sp|P02817|AMELX_BOVIN Amelogenin, X isoform OS=Bos taurus OX=9913 GN=AMELX PE=1 SV=2	1	hf1_10472_ebo_26_1_261219.ScanId;v=1;d1=28486.28486.3	controllerType=0 controllerNumber=1 scan=28486	58.8841
37061:3	1	S.MP[+15.995]LPPHPGHPGYINFS[+79.966]YEVLTPLKWYQSM.I		P[+16], S[+80]	1165.89	3	3495.65	3495.63	0	5.3	17	Non	320.75	320.75	5.8	6.05	1206	>sp|P02817|AMELX_BOVIN Amelogenin, X isoform OS=Bos taurus OX=9913 GN=AMELX PE=1 SV=2	1	hf1_10472_ebo_26_1_261219.ScanId;v=1;d1=27280.27280.3	controllerType=0 controllerNumber=1 scan=27280	56.7314
37663:3	1	S.MP[+15.995]LPPHPGHPGYINFS[+79.966]YEVLTPLKWYQSM.I		P[+16], S[+80]	1165.88	3	3495.64	3495.63	0	2.5	17	Non	325.45	325.45	5.8	5.83	1206	>sp|P02817|AMELX_BOVIN Amelogenin, X isoform OS=Bos taurus OX=9913 GN=AMELX PE=1 SV=2	1	hf1_10472_ebo_26_1_261219.ScanId;v=1;d1=27667.27667.3	controllerType=0 controllerNumber=1 scan=27667	57.4174
36549:4	1	S.MP[+15.995]LPPHPGHPGYINFS[+79.966]YEVLTPLKWYQSM.I		P[+16], S[+80]	874.668	4	3495.65	3495.63	0	5.3	17	Non	349.65	349.65	5.8	6.08	1206	>sp|P02817|AMELX_BOVIN Amelogenin, X isoform OS=Bos taurus OX=9913 GN=AMELX PE=1 SV=2	1	hf1_10472_ebo_26_1_261219.ScanId;v=1;d1=26939.26939.4	controllerType=0 controllerNumber=1 scan=26939	56.1174
36251:4	1	S.M[+15.995]PLPPHPGHPGYINFS[+79.966]YEVLTPLKWYQSM.I		M[+16], S[+80]	874.668	4	3495.65	3495.63	0	6	17	Non	352.3	352.3	1.58	6.08	1206	>sp|P02817|AMELX_BOVIN Amelogenin, X isoform OS=Bos taurus OX=9913 GN=AMELX PE=1 SV=2	1	hf1_10472_ebo_26_1_261219.ScanId;v=1;d1=26744.26744.4	controllerType=0 controllerNumber=1 scan=26744	55.772
34361:4	1	S.MPLPPHPGHPGYINFS[+79.966]YEVLTPLKWYQSM[+15.995].I		M[+16], S[+80]	874.668	4	3495.65	3495.63	0	5.8	17	Non	394.85	394.85	33.87	7	1206	>sp|P02817|AMELX_BOVIN Amelogenin, X isoform OS=Bos taurus OX=9913 GN=AMELX PE=1 SV=2	1	hf1_10472_ebo_26_1_261219.ScanId;v=1;d1=25471.25471.4	controllerType=0 controllerNumber=1 scan=25471	53.4849
35441:4	1	S.MPLPPHPGHPGYINFS[+79.966]YEVLTPLKWYQSM[+15.995].I		M[+16], S[+80]	874.666	4	3495.64	3495.63	0	2.9	17	Non	395.3	395.3	10.7	6.58	1206	>sp|P02817|AMELX_BOVIN Amelogenin, X isoform OS=Bos taurus OX=9913 GN=AMELX PE=1 SV=2	1	hf1_10472_ebo_26_1_261219.ScanId;v=1;d1=26210.26210.4	controllerType=0 controllerNumber=1 scan=26210	54.8158
38597:4	1	S.MPLPPHPGHPGYINFS[+79.966]YEVLTPLKWYQ[+0.984]SM.I		Q[+1], S[+80]	870.916	4	3480.64	3480.62	0	6.5	17	Non	408.83	408.83	58.04	7.06	1206	>sp|P02817|AMELX_BOVIN Amelogenin, X isoform OS=Bos taurus OX=9913 GN=AMELX PE=1 SV=2	1	hf1_10472_ebo_26_1_261219.ScanId;v=1;d1=28280.28280.4	controllerType=0 controllerNumber=1 scan=28280	58.5171
36770:3	1	S.MPLPPHPGHPGY[+15.995]INFS[+79.966]YEVLTPLKWYQSM.I		S[+80], Y[+16]	1165.89	3	3495.65	3495.63	0	5.6	17	Non	410.28	410.28	5.03	7.3	1206	>sp|P02817|AMELX_BOVIN Amelogenin, X isoform OS=Bos taurus OX=9913 GN=AMELX PE=1 SV=2	1	hf1_10472_ebo_26_1_261219.ScanId;v=1;d1=27086.27086.3	controllerType=0 controllerNumber=1 scan=27086	56.3821
34629:4	1	S.MPLPPHPGHPGYINFS[+79.966]YEVLTPLKWYQSM[+15.995].I		M[+16], S[+80]	874.668	4	3495.65	3495.63	0	5.7	17	Non	416.32	416.32	40.16	7.23	1206	>sp|P02817|AMELX_BOVIN Amelogenin, X isoform OS=Bos taurus OX=9913 GN=AMELX PE=1 SV=2	1	hf1_10472_ebo_26_1_261219.ScanId;v=1;d1=25663.25663.4	controllerType=0 controllerNumber=1 scan=25663	53.8276
38289:4	1	S.MPLPPHPGHPGYIN[+0.984]FS[+79.966]YEVLTPLKWYQSM.I		N[+1], S[+80]	870.916	4	3480.64	3480.62	0	6.4	17	Non	417.83	417.83	37.49	7.27	1206	>sp|P02817|AMELX_BOVIN Amelogenin, X isoform OS=Bos taurus OX=9913 GN=AMELX PE=1 SV=2	1	hf1_10472_ebo_26_1_261219.ScanId;v=1;d1=28080.28080.4	controllerType=0 controllerNumber=1 scan=28080	58.1598
34076:4	1	S.MPLPPHPGHPGYINFS[+79.966]YEVLTPLKWYQSM[+15.995].I		M[+16], S[+80]	874.668	4	3495.65	3495.63	0	5.8	17	Non	451.3	451.3	36.33	7.4	1206	>sp|P02817|AMELX_BOVIN Amelogenin, X isoform OS=Bos taurus OX=9913 GN=AMELX PE=1 SV=2	1	hf1_10472_ebo_26_1_261219.ScanId;v=1;d1=25275.25275.4	controllerType=0 controllerNumber=1 scan=25275	53.132
39536:3	1	S.MPLPPHPGHPGYINFS[+79.966]YEVLTPLKWYQ[+0.984]SM.I		Q[+1], S[+80]	1160.88	3	3480.63	3480.62	0	3.2	17	Non	520.53	520.53	68.42	7.79	1206	>sp|P02817|AMELX_BOVIN Amelogenin, X isoform OS=Bos taurus OX=9913 GN=AMELX PE=1 SV=2	1	hf1_10472_ebo_26_1_261219.ScanId;v=1;d1=28900.28900.3	controllerType=0 controllerNumber=1 scan=28900	59.6247
33847:3	1	S.MPLPPHPGHPGYINFS[+79.966]YEVLTPLKWY[+15.995]QSM.I		S[+80], Y[+16]	1165.89	3	3495.66	3495.63	0	9.5	17	Non	646.56	646.56	0	9.75	1206	>sp|P02817|AMELX_BOVIN Amelogenin, X isoform OS=Bos taurus OX=9913 GN=AMELX PE=1 SV=2	1	hf1_10472_ebo_26_1_261219.ScanId;v=1;d1=25119.25119.3	controllerType=0 controllerNumber=1 scan=25119	52.8522
34677:3	1	S.MPLPPHPGHPGYINFS[+79.966]YEVLTPLKWYQSM[+15.995].I		M[+16], S[+80]	1165.89	3	3495.66	3495.63	0	7.5	17	Non	739.63	739.63	55.3	12.07	1206	>sp|P02817|AMELX_BOVIN Amelogenin, X isoform OS=Bos taurus OX=9913 GN=AMELX PE=1 SV=2	1	hf1_10472_ebo_26_1_261219.ScanId;v=1;d1=25695.25695.3	controllerType=0 controllerNumber=1 scan=25695	53.8889
34959:3	1	S.MPLPPHPGHPGYINFS[+79.966]YEVLTPLKWYQSM[+15.995].I		M[+16], S[+80]	1165.88	3	3495.64	3495.63	0	2.3	17	Non	807.79	807.79	63.25	13.6	1206	>sp|P02817|AMELX_BOVIN Amelogenin, X isoform OS=Bos taurus OX=9913 GN=AMELX PE=1 SV=2	1	hf1_10472_ebo_26_1_261219.ScanId;v=1;d1=25883.25883.3	controllerType=0 controllerNumber=1 scan=25883	54.2301
35242:3	1	S.MPLPPHPGHPGYINFS[+79.966]YEVLTPLKWYQSM[+15.995].I		M[+16], S[+80]	1165.89	3	3495.64	3495.63	0	3.8	17	Non	855.27	855.27	20.49	14.6	1206	>sp|P02817|AMELX_BOVIN Amelogenin, X isoform OS=Bos taurus OX=9913 GN=AMELX PE=1 SV=2	1	hf1_10472_ebo_26_1_261219.ScanId;v=1;d1=26074.26074.3	controllerType=0 controllerNumber=1 scan=26074	54.5751
36468:3	1	S.MP[+15.995]LPPHPGHPGYINFS[+79.966]YEVLTPLKWYQSM.I		P[+16], S[+80]	1165.89	3	3495.65	3495.63	0	6.1	17	Non	858.14	858.14	5.8	15.07	1206	>sp|P02817|AMELX_BOVIN Amelogenin, X isoform OS=Bos taurus OX=9913 GN=AMELX PE=1 SV=2	1	hf1_10472_ebo_26_1_261219.ScanId;v=1;d1=26887.26887.3	controllerType=0 controllerNumber=1 scan=26887	56.0244
38598:3	1	S.MPLPPHPGHPGYINFS[+79.966]YEVLTPLKWYQ[+0.984]SM.I		Q[+1], S[+80]	1160.89	3	3480.64	3480.62	0	7.3	17	Non	919.78	919.78	192.14	16.07	1206	>sp|P02817|AMELX_BOVIN Amelogenin, X isoform OS=Bos taurus OX=9913 GN=AMELX PE=1 SV=2	1	hf1_10472_ebo_26_1_261219.ScanId;v=1;d1=28281.28281.3	controllerType=0 controllerNumber=1 scan=28281	58.5186
38305:3	1	S.MPLPPHPGHPGYIN[+0.984]FS[+79.966]YEVLTPLKWYQSM.I		N[+1], S[+80]	1160.89	3	3480.65	3480.62	0	7.6	17	Non	921.23	921.23	247.03	16.07	1206	>sp|P02817|AMELX_BOVIN Amelogenin, X isoform OS=Bos taurus OX=9913 GN=AMELX PE=1 SV=2	1	hf1_10472_ebo_26_1_261219.ScanId;v=1;d1=28090.28090.3	controllerType=0 controllerNumber=1 scan=28090	58.1778
36169:3	1	S.M[+15.995]PLPPHPGHPGYINFS[+79.966]YEVLTPLKWYQSM.I		M[+16], S[+80]	1165.89	3	3495.66	3495.63	0	7.7	17	Non	924.71	924.71	20.42	16.07	1206	>sp|P02817|AMELX_BOVIN Amelogenin, X isoform OS=Bos taurus OX=9913 GN=AMELX PE=1 SV=2	1	hf1_10472_ebo_26_1_261219.ScanId;v=1;d1=26691.26691.3	controllerType=0 controllerNumber=1 scan=26691	55.6779
34403:3	1	S.MPLPPHPGHPGYINFS[+79.966]YEVLTPLKWYQSM[+15.995].I		M[+16], S[+80]	1165.89	3	3495.65	3495.63	0	6.8	17	Non	936.79	936.79	80.71	16.07	1206	>sp|P02817|AMELX_BOVIN Amelogenin, X isoform OS=Bos taurus OX=9913 GN=AMELX PE=1 SV=2	1	hf1_10472_ebo_26_1_261219.ScanId;v=1;d1=25503.25503.3	controllerType=0 controllerNumber=1 scan=25503	53.5444
34129:3	1	S.MPLPPHPGHPGYINFS[+79.966]YEVLTPLKWYQSM[+15.995].I		M[+16], S[+80]	1165.89	3	3495.65	3495.63	0	6.5	17	Non	980.16	980.16	108.56	17.07	1206	>sp|P02817|AMELX_BOVIN Amelogenin, X isoform OS=Bos taurus OX=9913 GN=AMELX PE=1 SV=2	1	hf1_10472_ebo_26_1_261219.ScanId;v=1;d1=25312.25312.3	controllerType=0 controllerNumber=1 scan=25312	53.1989
34415:3	1	S.MPLPPHPGHPGYINFS[+79.966]YEVLTP[+31.990]LKWYQ[+0.984]SM.I		P[+32], Q[+1], S[+80]	1171.55	3	3512.64	3512.61	0	9.4	17	Non	61.25	61.25	9.92	1.7	1206	>sp|P02817|AMELX_BOVIN Amelogenin, X isoform OS=Bos taurus OX=9913 GN=AMELX PE=1 SV=2	1	hf1_10472_ebo_26_1_261219.ScanId;v=1;d1=25512.25512.3	controllerType=0 controllerNumber=1 scan=25512	53.5608
31657:3	1	S.MP[+15.995]LPPHPGHPGYINFS[+79.966]YEVLTP[+15.995]LKWYQSM.I		P[+16]*2, S[+80]	1171.22	3	3511.64	3511.63	0	5.2	17	Non	113.44	113.44	3.39	2.59	1206	>sp|P02817|AMELX_BOVIN Amelogenin, X isoform OS=Bos taurus OX=9913 GN=AMELX PE=1 SV=2	1	hf1_10472_ebo_26_1_261219.ScanId;v=1;d1=23666.23666.3	controllerType=0 controllerNumber=1 scan=23666	50.2832
33801:4	1	S.MPLPPHPGHPGYIN[+0.984]FS[+79.966]YEVLTPLKWYQSM[+15.995].I		M[+16], N[+1], S[+80]	874.917	4	3496.65	3496.61	0	9.2	17	Non	119.87	89.41	16.1	2.16	1206	>sp|P02817|AMELX_BOVIN Amelogenin, X isoform OS=Bos taurus OX=9913 GN=AMELX PE=1 SV=2	1	hf1_10472_ebo_26_1_261219.ScanId;v=1;d1=25086.25086.4	controllerType=0 controllerNumber=1 scan=25086	52.7918
31687:3	1	S.M[+15.995]PLPPHPGHPGYINFS[+79.966]YEVLTPLKWYQSM[+15.995].I		M[+16]*2, S[+80]	1171.22	3	3511.65	3511.63	0	5.8	17	Non	124.53	124.53	0	2.24	1206	>sp|P02817|AMELX_BOVIN Amelogenin, X isoform OS=Bos taurus OX=9913 GN=AMELX PE=1 SV=2	1	hf1_10472_ebo_26_1_261219.ScanId;v=1;d1=23686.23686.5	controllerType=0 controllerNumber=1 scan=23686	50.3217
38358:4	1	S.MPLPPHPGHPGYINFS[+79.966]Y[+15.995]EVLTPLKWYQ[+0.984]SM.I		Q[+1], S[+80], Y[+16]	874.91	4	3496.62	3496.61	0	1.3	17	Non	138.57	138.57	7.48	2.28	1206	>sp|P02817|AMELX_BOVIN Amelogenin, X isoform OS=Bos taurus OX=9913 GN=AMELX PE=1 SV=2	1	hf1_10472_ebo_26_1_261219.ScanId;v=1;d1=28125.28125.4	controllerType=0 controllerNumber=1 scan=28125	58.2395
35333:4	1	S.MPLPPHP[+15.995]GHPGYINFS[+79.966]YEVLTPLKW[+15.995]YQSM.I		P[+16], S[+80], W[+16]	878.665	4	3511.64	3511.63	0	4	17	Non	146.84	146.84	0	2.17	1206	>sp|P02817|AMELX_BOVIN Amelogenin, X isoform OS=Bos taurus OX=9913 GN=AMELX PE=1 SV=2	1	hf1_10472_ebo_26_1_261219.ScanId;v=1;d1=26136.26136.4	controllerType=0 controllerNumber=1 scan=26136	54.6844
35853:4	1	S.MPLPPHPGHPGYINFS[+79.966]YEVLTPLKWYQ[+0.984]SM[+15.995].I		M[+16], Q[+1], S[+80]	874.911	4	3496.62	3496.61	0	1.7	17	Non	168.23	168.23	11.31	2.77	1206	>sp|P02817|AMELX_BOVIN Amelogenin, X isoform OS=Bos taurus OX=9913 GN=AMELX PE=1 SV=2	1	hf1_10472_ebo_26_1_261219.ScanId;v=1;d1=26482.26482.4	controllerType=0 controllerNumber=1 scan=26482	55.3008
39382:4	1	S.MPLPPHPGHPGYIN[+0.984]FS[+79.966]YEVLTPLKWYQ[+0.984]SM.I		N[+1], Q[+1], S[+80]	871.162	4	3481.63	3481.6	0	6.7	17	Non	177.92	177.92	177.92	4.11	1206	>sp|P02817|AMELX_BOVIN Amelogenin, X isoform OS=Bos taurus OX=9913 GN=AMELX PE=1 SV=2	1	hf1_10472_ebo_26_1_261219.ScanId;v=1;d1=28800.28800.4	controllerType=0 controllerNumber=1 scan=28800	59.444
32972:5	1	S.MP[+15.995]LPPHPGHPGYINFS[+79.966]YEVLTPLKWYQSM[+15.995].I		M[+16], P[+16], S[+80]	703.135	5	3511.64	3511.63	0	5.3	17	Non	215.77	215.77	1.8	3.43	1206	>sp|P02817|AMELX_BOVIN Amelogenin, X isoform OS=Bos taurus OX=9913 GN=AMELX PE=1 SV=2	1	hf1_10472_ebo_26_1_261219.ScanId;v=1;d1=24524.24524.5	controllerType=0 controllerNumber=1 scan=24524	51.7947
32659:4	1	S.MPLPPHPGHP[+31.990]GYINFS[+79.966]YEVLTPLKWYQSM[+15.995].I		M[+16], P[+32], S[+80]	882.666	4	3527.64	3527.62	0	6.1	17	Non	218.16	218.16	7.97	3.91	1206	>sp|P02817|AMELX_BOVIN Amelogenin, X isoform OS=Bos taurus OX=9913 GN=AMELX PE=1 SV=2	1	hf1_10472_ebo_26_1_261219.ScanId;v=1;d1=24313.24313.4	controllerType=0 controllerNumber=1 scan=24313	51.4209
34517:4	1	S.MPLPPHPGH[+15.995]PGYINFS[+79.966]YEVLTPLKWYQSM[+15.995].I		H[+16], M[+16], S[+80]	878.664	4	3511.63	3511.63	0	2.2	17	Non	228.83	228.83	1.64	3.92	1206	>sp|P02817|AMELX_BOVIN Amelogenin, X isoform OS=Bos taurus OX=9913 GN=AMELX PE=1 SV=2	1	hf1_10472_ebo_26_1_261219.ScanId;v=1;d1=25582.25582.4	controllerType=0 controllerNumber=1 scan=25582	53.6844
33256:3	1	S.MPLPPHPGHPGYINFS[+79.966]YEVLTPLKW[+31.990]YQSM[+15.995].I		M[+16], S[+80], W[+32]	1176.55	3	3527.65	3527.62	0	8.3	17	Non	228.88	228.88	0	4.04	1206	>sp|P02817|AMELX_BOVIN Amelogenin, X isoform OS=Bos taurus OX=9913 GN=AMELX PE=1 SV=2	1	hf1_10472_ebo_26_1_261219.ScanId;v=1;d1=24717.24717.3	controllerType=0 controllerNumber=1 scan=24717	52.1404
31376:4	1	S.MPLPPHPGHPGYINFS[+79.966]YEVLTPLKW[+31.990]YQSM[+15.995].I		M[+16], S[+80], W[+32]	882.666	4	3527.64	3527.62	0	6.4	17	Non	253.2	253.2	4.14	5.42	1206	>sp|P02817|AMELX_BOVIN Amelogenin, X isoform OS=Bos taurus OX=9913 GN=AMELX PE=1 SV=2	1	hf1_10472_ebo_26_1_261219.ScanId;v=1;d1=23487.23487.4	controllerType=0 controllerNumber=1 scan=23487	49.9711
46215:4	1	S.MPLPPHPGHP[+31.990]GYINF[+31.990]SY[+15.995]EVLTPLKWYQSM.I		F[+32], P[+32], Y[+16]	870.67	4	3479.66	3479.64	0	4.4	17	Non	280.76	280.76	0.56	5.88	1206	>sp|P02817|AMELX_BOVIN Amelogenin, X isoform OS=Bos taurus OX=9913 GN=AMELX PE=1 SV=2	1	hf1_10472_ebo_26_1_261219.ScanId;v=1;d1=34366.34366.4	controllerType=0 controllerNumber=1 scan=34366	73.5811
33688:4	1	S.MPLPPHPGH[+15.995]PGYINFS[+79.966]YEVLTPLKWYQSM[+15.995].I		H[+16], M[+16], S[+80]	878.667	4	3511.65	3511.63	0	6.3	17	Non	291.67	291.67	6.24	5.73	1206	>sp|P02817|AMELX_BOVIN Amelogenin, X isoform OS=Bos taurus OX=9913 GN=AMELX PE=1 SV=2	1	hf1_10472_ebo_26_1_261219.ScanId;v=1;d1=25007.25007.4	controllerType=0 controllerNumber=1 scan=25007	52.6545
32942:4	1	S.MPLPPHPGHPGYINFS[+79.966]YEVLTP[+31.990]LKWYQSM[+15.995].I		M[+16], P[+32], S[+80]	882.665	4	3527.64	3527.62	0	4.8	17	Non	293.96	293.96	16.14	5.88	1206	>sp|P02817|AMELX_BOVIN Amelogenin, X isoform OS=Bos taurus OX=9913 GN=AMELX PE=1 SV=2	1	hf1_10472_ebo_26_1_261219.ScanId;v=1;d1=24506.24506.4	controllerType=0 controllerNumber=1 scan=24506	51.7648
46254:3	1	S.M[+15.995]PLPPHPGHPGYINFS[+79.966]YEVLTPLKWYQSM[+15.995].I		M[+16]*2, S[+80]	1171.22	3	3511.65	3511.63	0	7.9	17	Non	294.63	294.63	0	5.99	1206	>sp|P02817|AMELX_BOVIN Amelogenin, X isoform OS=Bos taurus OX=9913 GN=AMELX PE=1 SV=2	1	hf1_10472_ebo_26_1_261219.ScanId;v=1;d1=34396.34396.3	controllerType=0 controllerNumber=1 scan=34396	73.6352
46253:4	1	S.MP[+15.995]LPPHPGHPGYINFS[+79.966]YEVLTPLKWYQSM[+15.995].I		M[+16], P[+16], S[+80]	878.669	4	3511.66	3511.63	0	8.8	17	Non	295.82	295.82	1.8	5.62	1206	>sp|P02817|AMELX_BOVIN Amelogenin, X isoform OS=Bos taurus OX=9913 GN=AMELX PE=1 SV=2	1	hf1_10472_ebo_26_1_261219.ScanId;v=1;d1=34395.34395.4	controllerType=0 controllerNumber=1 scan=34395	73.6337
32640:3	1	S.M[+15.995]PLPPHPGHPGYINFS[+79.966]YEVLTPLKWY[+31.990]QSM.I		M[+16], S[+80], Y[+32]	1176.56	3	3527.65	3527.62	0	9.8	17	Non	303.43	303.43	0	5.68	1206	>sp|P02817|AMELX_BOVIN Amelogenin, X isoform OS=Bos taurus OX=9913 GN=AMELX PE=1 SV=2	1	hf1_10472_ebo_26_1_261219.ScanId;v=1;d1=24302.24302.3	controllerType=0 controllerNumber=1 scan=24302	51.4015
37147:4	1	S.MP[+15.995]LPPHPGHPGYIN[+0.984]FS[+79.966]YEVLTPLKWYQSM.I		N[+1], P[+16], S[+80]	874.915	4	3496.64	3496.61	0	6.5	17	Non	315.17	312.28	15.09	5.93	1206	>sp|P02817|AMELX_BOVIN Amelogenin, X isoform OS=Bos taurus OX=9913 GN=AMELX PE=1 SV=2	1	hf1_10472_ebo_26_1_261219.ScanId;v=1;d1=27334.27334.4	controllerType=0 controllerNumber=1 scan=27334	56.8262
33248:4	1	S.MPLPPHPGHPGYINFS[+79.966]YEVLTPLKW[+31.990]YQSM[+15.995].I		M[+16], S[+80], W[+32]	882.667	4	3527.65	3527.62	0	7.2	17	Non	324.53	324.53	1.88	6.02	1206	>sp|P02817|AMELX_BOVIN Amelogenin, X isoform OS=Bos taurus OX=9913 GN=AMELX PE=1 SV=2	1	hf1_10472_ebo_26_1_261219.ScanId;v=1;d1=24711.24711.4	controllerType=0 controllerNumber=1 scan=24711	52.1286
33103:4	1	S.M[+15.995]PLPPHPGHPGYINFS[+79.966]YEVLTPLKWYQSM[+15.995].I		M[+16]*2, S[+80]	878.667	4	3511.64	3511.63	0	5.3	17	Non	349.41	349.41	0	6.08	1206	>sp|P02817|AMELX_BOVIN Amelogenin, X isoform OS=Bos taurus OX=9913 GN=AMELX PE=1 SV=2	1	hf1_10472_ebo_26_1_261219.ScanId;v=1;d1=24617.24617.4	controllerType=0 controllerNumber=1 scan=24617	51.96
31401:3	1	S.MPLPPHPGHPGYINFS[+79.966]YEVLTPLKW[+31.990]YQSM[+15.995].I		M[+16], S[+80], W[+32]	1176.55	3	3527.64	3527.62	0	6.7	17	Non	351.03	351.03	15.41	5.99	1206	>sp|P02817|AMELX_BOVIN Amelogenin, X isoform OS=Bos taurus OX=9913 GN=AMELX PE=1 SV=2	1	hf1_10472_ebo_26_1_261219.ScanId;v=1;d1=23503.23503.3	controllerType=0 controllerNumber=1 scan=23503	49.9978
35157:4	1	S.MPLPPHPGHPGYIN[+0.984]FS[+79.966]YEVLTPLKWYQSM[+15.995].I		M[+16], N[+1], S[+80]	874.915	4	3496.64	3496.61	0	6.8	17	Non	354.59	354.31	19.08	6.12	1206	>sp|P02817|AMELX_BOVIN Amelogenin, X isoform OS=Bos taurus OX=9913 GN=AMELX PE=1 SV=2	1	hf1_10472_ebo_26_1_261219.ScanId;v=1;d1=26015.26015.4	controllerType=0 controllerNumber=1 scan=26015	54.4701
34242:4	1	S.MP[+15.995]LPPHPGHPGYINFS[+79.966]YEVLTPLKWYQSM[+15.995].I		M[+16], P[+16], S[+80]	878.663	4	3511.63	3511.63	0	1.8	17	Non	368.02	368.02	1.8	5.95	1206	>sp|P02817|AMELX_BOVIN Amelogenin, X isoform OS=Bos taurus OX=9913 GN=AMELX PE=1 SV=2	1	hf1_10472_ebo_26_1_261219.ScanId;v=1;d1=25390.25390.4	controllerType=0 controllerNumber=1 scan=25390	53.3388
37453:4	1	S.MP[+15.995]LPPHPGHPGYINFS[+79.966]YEVLTPLKWYQ[+0.984]SM.I		P[+16], Q[+1], S[+80]	874.914	4	3496.64	3496.61	0	6.1	17	Non	385.68	374.96	5.8	7	1206	>sp|P02817|AMELX_BOVIN Amelogenin, X isoform OS=Bos taurus OX=9913 GN=AMELX PE=1 SV=2	1	hf1_10472_ebo_26_1_261219.ScanId;v=1;d1=27527.27527.4	controllerType=0 controllerNumber=1 scan=27527	57.1686
33402:4	1	S.MP[+15.995]LPPHPGHPGYINFS[+79.966]YEVLTPLKWYQSM[+15.995].I		M[+16], P[+16], S[+80]	878.667	4	3511.65	3511.63	0	5.9	17	Non	400.16	400.16	1.8	7.02	1206	>sp|P02817|AMELX_BOVIN Amelogenin, X isoform OS=Bos taurus OX=9913 GN=AMELX PE=1 SV=2	1	hf1_10472_ebo_26_1_261219.ScanId;v=1;d1=24815.24815.4	controllerType=0 controllerNumber=1 scan=24815	52.3103
31329:3	1	S.MPLPPHPGHPGYINFS[+79.966]YEVLTPLKW[+31.990]YQSM[+15.995].I		M[+16], S[+80], W[+32]	1176.55	3	3527.65	3527.62	0	7.2	17	Non	400.89	400.89	15.5	7.03	1206	>sp|P02817|AMELX_BOVIN Amelogenin, X isoform OS=Bos taurus OX=9913 GN=AMELX PE=1 SV=2	1	hf1_10472_ebo_26_1_261219.ScanId;v=1;d1=23456.23456.3	controllerType=0 controllerNumber=1 scan=23456	49.9158
32963:3	1	S.MPLPPHPGHPGYINFS[+79.966]YEVLTP[+31.990]LKWYQSM[+15.995].I		M[+16], P[+32], S[+80]	1176.55	3	3527.64	3527.62	0	5.9	17	Non	444.95	444.95	14.42	7.37	1206	>sp|P02817|AMELX_BOVIN Amelogenin, X isoform OS=Bos taurus OX=9913 GN=AMELX PE=1 SV=2	1	hf1_10472_ebo_26_1_261219.ScanId;v=1;d1=24519.24519.3	controllerType=0 controllerNumber=1 scan=24519	51.7872
33570:3	1	S.MP[+15.995]LPPHPGHPGYINFS[+79.966]YEVLTPLKWYQSM[+15.995].I		M[+16], P[+16], S[+80]	1171.22	3	3511.65	3511.63	0	6.5	17	Non	661.71	661.71	1.8	11.07	1206	>sp|P02817|AMELX_BOVIN Amelogenin, X isoform OS=Bos taurus OX=9913 GN=AMELX PE=1 SV=2	1	hf1_10472_ebo_26_1_261219.ScanId;v=1;d1=24927.24927.3	controllerType=0 controllerNumber=1 scan=24927	52.5129
37379:3	1	S.M[+15.995]PLPPHPGHPGYINFS[+79.966]YEVLTPLKWYQ[+0.984]SM.I		M[+16], Q[+1], S[+80]	1166.22	3	3496.64	3496.61	0	7.3	17	Non	668.74	668.74	1.33	11.07	1206	>sp|P02817|AMELX_BOVIN Amelogenin, X isoform OS=Bos taurus OX=9913 GN=AMELX PE=1 SV=2	1	hf1_10472_ebo_26_1_261219.ScanId;v=1;d1=27477.27477.3	controllerType=0 controllerNumber=1 scan=27477	57.0785
33272:3	1	S.M[+15.995]PLPPHPGHPGYINFS[+79.966]YEVLTPLKWYQSM[+15.995].I		M[+16]*2, S[+80]	1171.22	3	3511.65	3511.63	0	6.4	17	Non	843.71	843.71	0	14.07	1206	>sp|P02817|AMELX_BOVIN Amelogenin, X isoform OS=Bos taurus OX=9913 GN=AMELX PE=1 SV=2	1	hf1_10472_ebo_26_1_261219.ScanId;v=1;d1=24727.24727.3	controllerType=0 controllerNumber=1 scan=24727	52.1583
32977:3	1	S.M[+15.995]PLPPHPGHPGYINFS[+79.966]YEVLTPLKWYQSM[+15.995].I		M[+16]*2, S[+80]	1171.22	3	3511.65	3511.63	0	7	17	Non	904.24	904.24	0	16.07	1206	>sp|P02817|AMELX_BOVIN Amelogenin, X isoform OS=Bos taurus OX=9913 GN=AMELX PE=1 SV=2	1	hf1_10472_ebo_26_1_261219.ScanId;v=1;d1=24528.24528.3	controllerType=0 controllerNumber=1 scan=24528	51.8036
38897:4	1	S.MPLPPHPGHPGYIN[+0.984]F[+31.990]SY[+31.990]EVLTPLKWYQSM[+15.995].I		F[+32], M[+16], N[+1], Y[+32]	870.917	4	3480.64	3480.63	0	4.8	17	Non	119.62	119.62	2.53	2.61	1206	>sp|P02817|AMELX_BOVIN Amelogenin, X isoform OS=Bos taurus OX=9913 GN=AMELX PE=1 SV=2	1	hf1_10472_ebo_26_1_261219.ScanId;v=1;d1=28475.28475.2	controllerType=0 controllerNumber=1 scan=28475	58.8645
37753:4	1	S.MPLPPHP[+15.995]GHP[+15.995]GY[+31.990]INF[+31.990]SYEVLTPLKWYQSM.I		F[+32], P[+16]*2, Y[+32]	874.664	4	3495.63	3495.64	0	-1.7	17	Non	137.65	137.65	0	2.17	1206	>sp|P02817|AMELX_BOVIN Amelogenin, X isoform OS=Bos taurus OX=9913 GN=AMELX PE=1 SV=2	1	hf1_10472_ebo_26_1_261219.ScanId;v=1;d1=27728.27728.4	controllerType=0 controllerNumber=1 scan=27728	57.5294
32365:4	1	S.MP[+15.995]LPPHPGHPGYINFS[+79.966]YEVLTPLKW[+31.990]YQSM[+15.995].I		M[+16], P[+16], S[+80], W[+32]	886.668	4	3543.65	3543.62	0	9.8	17	Non	149.74	149.74	0	2.19	1206	>sp|P02817|AMELX_BOVIN Amelogenin, X isoform OS=Bos taurus OX=9913 GN=AMELX PE=1 SV=2	1	hf1_10472_ebo_26_1_261219.ScanId;v=1;d1=24130.24130.4	controllerType=0 controllerNumber=1 scan=24130	51.0998
30780:4	1	S.M[+15.995]PLPPHPGHPGYINFS[+79.966]YEVLTPLKW[+31.990]YQSM[+15.995].I		M[+16]*2, S[+80], W[+32]	886.661	4	3543.62	3543.62	0	2.1	17	Non	219.5	219.5	6.46	3.41	1206	>sp|P02817|AMELX_BOVIN Amelogenin, X isoform OS=Bos taurus OX=9913 GN=AMELX PE=1 SV=2	1	hf1_10472_ebo_26_1_261219.ScanId;v=1;d1=23095.23095.4	controllerType=0 controllerNumber=1 scan=23095	49.2812
29933:4	1	S.MP[+15.995]LPPHPGHPGYINFS[+79.966]YEVLTPLKW[+31.990]YQSM[+15.995].I		M[+16], P[+16], S[+80], W[+32]	886.665	4	3543.64	3543.62	0	6	17	Non	260.37	260.37	1.8	5.38	1206	>sp|P02817|AMELX_BOVIN Amelogenin, X isoform OS=Bos taurus OX=9913 GN=AMELX PE=1 SV=2	1	hf1_10472_ebo_26_1_261219.ScanId;v=1;d1=22508.22508.4	controllerType=0 controllerNumber=1 scan=22508	48.2458
30209:4	1	S.MP[+15.995]LPPHPGHPGYINFS[+79.966]YEVLTPLKW[+31.990]YQSM[+15.995].I		M[+16], P[+16], S[+80], W[+32]	886.665	4	3543.64	3543.62	0	6.1	17	Non	287.34	287.34	8.12	5.93	1206	>sp|P02817|AMELX_BOVIN Amelogenin, X isoform OS=Bos taurus OX=9913 GN=AMELX PE=1 SV=2	1	hf1_10472_ebo_26_1_261219.ScanId;v=1;d1=22707.22707.4	controllerType=0 controllerNumber=1 scan=22707	48.5972
46221:4	1	S.MPLPPHPGHP[+15.995]GYINF[+31.990]SY[+31.990]EVLTPLKWYQSM[+15.995].I		F[+32], M[+16], P[+16], Y[+32]	874.669	4	3495.65	3495.64	0	4.4	17	Non	289.58	289.58	0	5.88	1206	>sp|P02817|AMELX_BOVIN Amelogenin, X isoform OS=Bos taurus OX=9913 GN=AMELX PE=1 SV=2	1	hf1_10472_ebo_26_1_261219.ScanId;v=1;d1=34371.34371.4	controllerType=0 controllerNumber=1 scan=34371	73.5914
36849:4	1	S.MPLPPHPGHP[+31.990]GY[+15.995]INF[+15.995]SY[+31.990]EVLTPLKWYQSM.I		F[+16], P[+32], Y[+16][+32]	874.668	4	3495.65	3495.64	0	3.8	17	Non	363.53	363.53	4.43	6.79	1206	>sp|P02817|AMELX_BOVIN Amelogenin, X isoform OS=Bos taurus OX=9913 GN=AMELX PE=1 SV=2	1	hf1_10472_ebo_26_1_261219.ScanId;v=1;d1=27139.27139.4	controllerType=0 controllerNumber=1 scan=27139	56.4764
29974:3	1	S.M[+15.995]PLPPHPGHPGYINFS[+79.966]YEVLTPLKW[+31.990]YQSM[+15.995].I		M[+16]*2, S[+80], W[+32]	1181.89	3	3543.65	3543.62	0	9.6	17	Non	507.05	507.05	0	7.14	1206	>sp|P02817|AMELX_BOVIN Amelogenin, X isoform OS=Bos taurus OX=9913 GN=AMELX PE=1 SV=2	1	hf1_10472_ebo_26_1_261219.ScanId;v=1;d1=22538.22538.3	controllerType=0 controllerNumber=1 scan=22538	48.2993
31817:3	1	S.M[+15.995]PLPPHPGHPGYINFS[+79.966]YEVLTPLKW[+31.990]YQSM[+15.995].I		M[+16]*2, S[+80], W[+32]	1181.89	3	3543.65	3543.62	0	9.9	17	Non	529.9	529.9	0	7.13	1206	>sp|P02817|AMELX_BOVIN Amelogenin, X isoform OS=Bos taurus OX=9913 GN=AMELX PE=1 SV=2	1	hf1_10472_ebo_26_1_261219.ScanId;v=1;d1=23774.23774.3	controllerType=0 controllerNumber=1 scan=23774	50.475
37720:5	1	S.MPLPPHPGHPGYINFS[+79.966]YEVLTPLKWYQSMIR.H		S[+80]	750.574	5	3748.84	3748.82	0	5.6	17	NRagged	525.56	525.56	70.92	9.19	1206	>sp|P02817|AMELX_BOVIN Amelogenin, X isoform OS=Bos taurus OX=9913 GN=AMELX PE=1 SV=2	1	hf1_10472_ebo_26_1_261219.ScanId;v=1;d1=27707.27707.5	controllerType=0 controllerNumber=1 scan=27707	57.4919
38375:4	1	S.MPLPPHPGHPGYINFS[+79.966]YEVLTPLKWYQSMIR.H		S[+80]	937.969	4	3748.85	3748.82	0	8.5	17	NRagged	555.9	555.9	69.79	8.89	1206	>sp|P02817|AMELX_BOVIN Amelogenin, X isoform OS=Bos taurus OX=9913 GN=AMELX PE=1 SV=2	1	hf1_10472_ebo_26_1_261219.ScanId;v=1;d1=28136.28136.4	controllerType=0 controllerNumber=1 scan=28136	58.259
37750:3	1	S.MPLPPHPGHPGYINFS[+79.966]YEVLTPLKWYQSMIR.H		S[+80]	1250.29	3	3748.84	3748.82	0	5.8	17	NRagged	604.85	604.85	184.08	9.41	1206	>sp|P02817|AMELX_BOVIN Amelogenin, X isoform OS=Bos taurus OX=9913 GN=AMELX PE=1 SV=2	1	hf1_10472_ebo_26_1_261219.ScanId;v=1;d1=27725.27725.3	controllerType=0 controllerNumber=1 scan=27725	57.5221
37771:3	1	S.MPLPPHPGHPGYINFS[+79.966]YEVLTPLKWYQSMIR.H		S[+80]	1250.28	3	3748.84	3748.82	0	4.7	17	NRagged	652.15	652.15	235.75	11.11	1206	>sp|P02817|AMELX_BOVIN Amelogenin, X isoform OS=Bos taurus OX=9913 GN=AMELX PE=1 SV=2	1	hf1_10472_ebo_26_1_261219.ScanId;v=1;d1=27741.27741.3	controllerType=0 controllerNumber=1 scan=27741	57.552
38027:5	1	S.MPLPPHPGHPGYINFS[+79.966]YEVLTPLKWYQSMIR.H		S[+80]	750.574	5	3748.84	3748.82	0	6.1	17	NRagged	688.29	688.29	129.17	12	1206	>sp|P02817|AMELX_BOVIN Amelogenin, X isoform OS=Bos taurus OX=9913 GN=AMELX PE=1 SV=2	1	hf1_10472_ebo_26_1_261219.ScanId;v=1;d1=27909.27909.5	controllerType=0 controllerNumber=1 scan=27909	57.8522
38075:4	1	S.MPLPPHPGHPGYINFS[+79.966]YEVLTPLKWYQSMIR.H		S[+80]	937.966	4	3748.84	3748.82	0	6	17	NRagged	1293.5	1293.5	405.3	23.96	1206	>sp|P02817|AMELX_BOVIN Amelogenin, X isoform OS=Bos taurus OX=9913 GN=AMELX PE=1 SV=2	1	hf1_10472_ebo_26_1_261219.ScanId;v=1;d1=27940.27940.4	controllerType=0 controllerNumber=1 scan=27940	57.9079
37783:4	1	S.MPLPPHPGHPGYINFS[+79.966]YEVLTPLKWYQSMIR.H		S[+80]	937.966	4	3748.84	3748.82	0	5.9	17	NRagged	1343.81	1343.81	410.15	24.96	1206	>sp|P02817|AMELX_BOVIN Amelogenin, X isoform OS=Bos taurus OX=9913 GN=AMELX PE=1 SV=2	1	hf1_10472_ebo_26_1_261219.ScanId;v=1;d1=27749.27749.4	controllerType=0 controllerNumber=1 scan=27749	57.5669
34865:4	1	S.MPLPPHPGHPGYIN[+0.984]FSYEVLTPLKWYQ[+0.984]SMIR.H		N[+1], Q[+1]	918.463	4	3670.83	3670.82	0	1.8	17	NRagged	13.45	13.45	13.45	2.16	1206	>sp|P02817|AMELX_BOVIN Amelogenin, X isoform OS=Bos taurus OX=9913 GN=AMELX PE=1 SV=2	1	hf1_10472_ebo_26_1_261219.ScanId;v=1;d1=25820.25820.4	controllerType=0 controllerNumber=1 scan=25820	54.1126
36739:4	1	S.MPLPPHPGHP[+31.990]GYINFS[+79.966]YEVLTPLKWYQSMIR.H		P[+32], S[+80]	945.965	4	3780.84	3780.81	0	7.5	17	NRagged	32.27	32.27	0	2.18	1206	>sp|P02817|AMELX_BOVIN Amelogenin, X isoform OS=Bos taurus OX=9913 GN=AMELX PE=1 SV=2	1	hf1_10472_ebo_26_1_261219.ScanId;v=1;d1=27066.27066.3	controllerType=0 controllerNumber=1 scan=27066	56.3462
35360:4	1	S.MPLPPHPGHPGYINFS[+79.966]YEVLTPLKWY[+31.990]QSMIR.H		S[+80], Y[+32]	945.965	4	3780.84	3780.81	0	7.3	17	NRagged	273.33	273.33	0	6.33	1206	>sp|P02817|AMELX_BOVIN Amelogenin, X isoform OS=Bos taurus OX=9913 GN=AMELX PE=1 SV=2	1	hf1_10472_ebo_26_1_261219.ScanId;v=1;d1=26154.26154.4	controllerType=0 controllerNumber=1 scan=26154	54.7172
34981:5	1	S.MPLPPHPGHPGYINFS[+79.966]YEVLTPLKWYQSM[+15.995]IR.H		M[+16], S[+80]	753.771	5	3764.83	3764.82	0	3.3	17	NRagged	298.52	298.52	1.77	6.5	1206	>sp|P02817|AMELX_BOVIN Amelogenin, X isoform OS=Bos taurus OX=9913 GN=AMELX PE=1 SV=2	1	hf1_10472_ebo_26_1_261219.ScanId;v=1;d1=25896.25896.5	controllerType=0 controllerNumber=1 scan=25896	54.2526
38083:3	1	S.MPLPPHPGHPGYIN[+0.984]FS[+79.966]YEVLTPLKWYQSMIR.H		N[+1], S[+80]	1250.62	3	3749.84	3749.8	0	9.7	17	NRagged	313.48	313.48	111.29	5.67	1206	>sp|P02817|AMELX_BOVIN Amelogenin, X isoform OS=Bos taurus OX=9913 GN=AMELX PE=1 SV=2	1	hf1_10472_ebo_26_1_261219.ScanId;v=1;d1=27947.27947.3	controllerType=0 controllerNumber=1 scan=27947	57.9213
39420:4	1	S.MPLPPHPGHPGYINF[+31.990]SY[+31.990]EVLTPLKWYQSMIR.H		F[+32], Y[+32]	933.96	4	3732.82	3732.83	0	-4.5	17	NRagged	336.66	336.66	10.15	5.52	1206	>sp|P02817|AMELX_BOVIN Amelogenin, X isoform OS=Bos taurus OX=9913 GN=AMELX PE=1 SV=2	1	hf1_10472_ebo_26_1_261219.ScanId;v=1;d1=28826.28826.4	controllerType=0 controllerNumber=1 scan=28826	59.4921
39317:5	1	S.MPLPPHPGHPGYINFS[+79.966]YEVLTPLKWYQ[+0.984]SMIR.H		Q[+1], S[+80]	750.772	5	3749.83	3749.8	0	7.5	17	NRagged	358.45	358.45	12.58	7.39	1206	>sp|P02817|AMELX_BOVIN Amelogenin, X isoform OS=Bos taurus OX=9913 GN=AMELX PE=1 SV=2	1	hf1_10472_ebo_26_1_261219.ScanId;v=1;d1=28757.28757.5	controllerType=0 controllerNumber=1 scan=28757	59.3672
35153:5	1	S.MPLPPHPGHPGYINFS[+79.966]YEVLTPLKWYQSM[+15.995]IR.H		M[+16], S[+80]	753.772	5	3764.83	3764.82	0	3.9	17	NRagged	457.17	457.17	26.88	8.62	1206	>sp|P02817|AMELX_BOVIN Amelogenin, X isoform OS=Bos taurus OX=9913 GN=AMELX PE=1 SV=2	1	hf1_10472_ebo_26_1_261219.ScanId;v=1;d1=26011.26011.3	controllerType=0 controllerNumber=1 scan=26011	54.4619
33885:5	1	S.MPLPPHPGHPGYINFS[+79.966]YEVLTPLKWYQSM[+15.995]IR.H		M[+16], S[+80]	753.774	5	3764.84	3764.82	0	7.3	17	NRagged	482.69	482.69	33.74	9.13	1206	>sp|P02817|AMELX_BOVIN Amelogenin, X isoform OS=Bos taurus OX=9913 GN=AMELX PE=1 SV=2	1	hf1_10472_ebo_26_1_261219.ScanId;v=1;d1=25143.25143.5	controllerType=0 controllerNumber=1 scan=25143	52.8937
36918:3	1	S.M[+15.995]PLPPHPGHPGYINFS[+79.966]YEVLTPLKWYQSMIR.H		M[+16], S[+80]	1255.62	3	3764.84	3764.82	0	5.6	17	NRagged	525.42	525.42	14.39	8.31	1206	>sp|P02817|AMELX_BOVIN Amelogenin, X isoform OS=Bos taurus OX=9913 GN=AMELX PE=1 SV=2	1	hf1_10472_ebo_26_1_261219.ScanId;v=1;d1=27184.27184.3	controllerType=0 controllerNumber=1 scan=27184	56.5557
37293:4	1	S.M[+15.995]PLPPHPGHPGYINFS[+79.966]YEVLTPLKWYQSMIR.H		M[+16], S[+80]	941.966	4	3764.84	3764.82	0	7.3	17	NRagged	533.02	533.02	7.8	9.2	1206	>sp|P02817|AMELX_BOVIN Amelogenin, X isoform OS=Bos taurus OX=9913 GN=AMELX PE=1 SV=2	1	hf1_10472_ebo_26_1_261219.ScanId;v=1;d1=27424.27424.4	controllerType=0 controllerNumber=1 scan=27424	56.9843
36887:5	1	S.MP[+15.995]LPPHPGHPGYINFS[+79.966]YEVLTPLKWYQSMIR.H		P[+16], S[+80]	753.773	5	3764.83	3764.82	0	5.1	17	NRagged	551.87	551.87	5.8	9.19	1206	>sp|P02817|AMELX_BOVIN Amelogenin, X isoform OS=Bos taurus OX=9913 GN=AMELX PE=1 SV=2	1	hf1_10472_ebo_26_1_261219.ScanId;v=1;d1=27164.27164.5	controllerType=0 controllerNumber=1 scan=27164	56.5198
34155:5	1	S.MPLPPHPGHPGYINFS[+79.966]YEVLTPLKWYQSM[+15.995]IR.H		M[+16], S[+80]	753.774	5	3764.84	3764.82	0	6.3	17	NRagged	594.04	594.04	45.39	10.04	1206	>sp|P02817|AMELX_BOVIN Amelogenin, X isoform OS=Bos taurus OX=9913 GN=AMELX PE=1 SV=2	1	hf1_10472_ebo_26_1_261219.ScanId;v=1;d1=25333.25333.5	controllerType=0 controllerNumber=1 scan=25333	53.2389
33970:3	1	S.MPLPPHPGHPGYINFS[+79.966]YEVLTPLKWYQSM[+15.995]IR.H		M[+16], S[+80]	1255.62	3	3764.85	3764.82	0	7.8	17	NRagged	596.97	596.97	27.23	9.16	1206	>sp|P02817|AMELX_BOVIN Amelogenin, X isoform OS=Bos taurus OX=9913 GN=AMELX PE=1 SV=2	1	hf1_10472_ebo_26_1_261219.ScanId;v=1;d1=25203.25203.3	controllerType=0 controllerNumber=1 scan=25203	53.0019
33862:4	1	S.MPLPPHPGHPGYINFS[+79.966]YEVLTPLKWYQSM[+15.995]IR.H		M[+16], S[+80]	941.965	4	3764.84	3764.82	0	5.8	17	NRagged	864.06	864.06	37.06	15.96	1206	>sp|P02817|AMELX_BOVIN Amelogenin, X isoform OS=Bos taurus OX=9913 GN=AMELX PE=1 SV=2	1	hf1_10472_ebo_26_1_261219.ScanId;v=1;d1=25129.25129.4	controllerType=0 controllerNumber=1 scan=25129	52.8699
35808:4	1	S.MPLPPHPGHPGYINFS[+79.966]YEVLTPLK[+15.995]WYQSMIR.H		K[+16], S[+80]	941.966	4	3764.84	3764.82	0	7.1	17	NRagged	953.3	953.3	0.17	18.01	1206	>sp|P02817|AMELX_BOVIN Amelogenin, X isoform OS=Bos taurus OX=9913 GN=AMELX PE=1 SV=2	1	hf1_10472_ebo_26_1_261219.ScanId;v=1;d1=26453.26453.4	controllerType=0 controllerNumber=1 scan=26453	55.2514
38847:4	1	S.MPLPPHPGHPGYIN[+0.984]FS[+79.966]YEVLTPLKWYQSMIR.H		N[+1], S[+80]	938.213	4	3749.83	3749.8	0	6.8	17	NRagged	1041.8	1041.8	313.65	19.01	1206	>sp|P02817|AMELX_BOVIN Amelogenin, X isoform OS=Bos taurus OX=9913 GN=AMELX PE=1 SV=2	1	hf1_10472_ebo_26_1_261219.ScanId;v=1;d1=28442.28442.4	controllerType=0 controllerNumber=1 scan=28442	58.806
39427:4	1	S.MPLPPHPGHPGYINFS[+79.966]YEVLTPLKWYQ[+0.984]SMIR.H		Q[+1], S[+80]	938.214	4	3749.83	3749.8	0	7.5	17	NRagged	1050.11	1050.11	57.43	20.01	1206	>sp|P02817|AMELX_BOVIN Amelogenin, X isoform OS=Bos taurus OX=9913 GN=AMELX PE=1 SV=2	1	hf1_10472_ebo_26_1_261219.ScanId;v=1;d1=28831.28831.4	controllerType=0 controllerNumber=1 scan=28831	59.5026
39145:4	1	S.MPLPPHPGHPGYIN[+0.984]FS[+79.966]YEVLTPLKWYQSMIR.H		N[+1], S[+80]	938.213	4	3749.83	3749.8	0	7.3	17	NRagged	1057.78	1057.78	137.98	20.01	1206	>sp|P02817|AMELX_BOVIN Amelogenin, X isoform OS=Bos taurus OX=9913 GN=AMELX PE=1 SV=2	1	hf1_10472_ebo_26_1_261219.ScanId;v=1;d1=28639.28639.4	controllerType=0 controllerNumber=1 scan=28639	59.1595
34414:4	1	S.MPLPPHPGHPGYINFS[+79.966]YEVLTPLKWYQSM[+15.995]IR.H		M[+16], S[+80]	941.966	4	3764.84	3764.82	0	6.8	17	NRagged	1099.26	1099.26	31.53	20.01	1206	>sp|P02817|AMELX_BOVIN Amelogenin, X isoform OS=Bos taurus OX=9913 GN=AMELX PE=1 SV=2	1	hf1_10472_ebo_26_1_261219.ScanId;v=1;d1=25511.25511.4	controllerType=0 controllerNumber=1 scan=25511	53.5593
36975:4	1	S.M[+15.995]PLPPHPGHPGYINFS[+79.966]YEVLTPLKWYQSMIR.H		M[+16], S[+80]	941.965	4	3764.84	3764.82	0	6.1	17	NRagged	1289.03	1289.03	48.05	23.96	1206	>sp|P02817|AMELX_BOVIN Amelogenin, X isoform OS=Bos taurus OX=9913 GN=AMELX PE=1 SV=2	1	hf1_10472_ebo_26_1_261219.ScanId;v=1;d1=27222.27222.4	controllerType=0 controllerNumber=1 scan=27222	56.6266
34133:4	1	S.MPLPPHPGHPGYINFS[+79.966]YEVLTPLKWYQSM[+15.995]IR.H		M[+16], S[+80]	941.965	4	3764.84	3764.82	0	6	17	NRagged	1356.96	1356.96	58.85	25.96	1206	>sp|P02817|AMELX_BOVIN Amelogenin, X isoform OS=Bos taurus OX=9913 GN=AMELX PE=1 SV=2	1	hf1_10472_ebo_26_1_261219.ScanId;v=1;d1=25316.25316.4	controllerType=0 controllerNumber=1 scan=25316	53.2077
35071:4	1	S.MPLPPHPGHPGYIN[+0.984]FS[+79.966]YEVLTPLKW[+31.990]YQSMIR.H		N[+1], S[+80], W[+32]	946.211	4	3781.82	3781.79	0	7	17	NRagged	16.01	16.01	0	2.16	1206	>sp|P02817|AMELX_BOVIN Amelogenin, X isoform OS=Bos taurus OX=9913 GN=AMELX PE=1 SV=2	1	hf1_10472_ebo_26_1_261219.ScanId;v=1;d1=25961.25961.4	controllerType=0 controllerNumber=1 scan=25961	54.3751
39159:3	1	S.MPLPPHPGHPGY[+31.990]INF[+31.990]SY[+15.995]EVLTPLKWYQSMIR.H		F[+32], Y[+16][+32]	1250.28	3	3748.83	3748.83	0	1.3	17	NRagged	23.79	23.79	1.5	2.19	1206	>sp|P02817|AMELX_BOVIN Amelogenin, X isoform OS=Bos taurus OX=9913 GN=AMELX PE=1 SV=2	1	hf1_10472_ebo_26_1_261219.ScanId;v=1;d1=28648.28648.3	controllerType=0 controllerNumber=1 scan=28648	59.1732
32195:4	1	S.MPLPPHPGHPGYINFS[+79.966]YEVLTP[+15.995]LKWYQSM[+15.995]IR.H		M[+16], P[+16], S[+80]	945.962	4	3780.83	3780.81	0	3.9	17	NRagged	71.81	71.81	6.85	2.25	1206	>sp|P02817|AMELX_BOVIN Amelogenin, X isoform OS=Bos taurus OX=9913 GN=AMELX PE=1 SV=2	1	hf1_10472_ebo_26_1_261219.ScanId;v=1;d1=24022.24022.3	controllerType=0 controllerNumber=1 scan=24022	50.9077
39269:5	1	S.MPLPPHPGHPGY[+31.990]INF[+31.990]SY[+15.995]EVLTPLKWYQSMIR.H		F[+32], Y[+16][+32]	750.572	5	3748.83	3748.83	0	0.1	17	NRagged	94.64	94.64	0.97	3.05	1206	>sp|P02817|AMELX_BOVIN Amelogenin, X isoform OS=Bos taurus OX=9913 GN=AMELX PE=1 SV=2	1	hf1_10472_ebo_26_1_261219.ScanId;v=1;d1=28729.28729.6	controllerType=0 controllerNumber=1 scan=28729	59.3191
34220:4	1	S.MPLPPHPGHPGYIN[+0.984]FS[+79.966]YEVLTPLKW[+31.990]YQSMIR.H		N[+1], S[+80], W[+32]	946.209	4	3781.82	3781.79	0	5.6	17	NRagged	98.22	53.97	0	2.18	1206	>sp|P02817|AMELX_BOVIN Amelogenin, X isoform OS=Bos taurus OX=9913 GN=AMELX PE=1 SV=2	1	hf1_10472_ebo_26_1_261219.ScanId;v=1;d1=25375.25375.4	controllerType=0 controllerNumber=1 scan=25375	53.3106
33655:4	1	S.MPLPPHPGHPGYIN[+0.984]FS[+79.966]YEVLTP[+31.990]LKWYQSMIR.H		N[+1], P[+32], S[+80]	946.212	4	3781.83	3781.79	0	8.7	17	NRagged	98.49	98.49	0.31	2.36	1206	>sp|P02817|AMELX_BOVIN Amelogenin, X isoform OS=Bos taurus OX=9913 GN=AMELX PE=1 SV=2	1	hf1_10472_ebo_26_1_261219.ScanId;v=1;d1=24985.24985.4	controllerType=0 controllerNumber=1 scan=24985	52.6161
38981:5	1	S.MPLPPHPGH[+15.995]PGY[+31.990]INFSY[+31.990]EVLTPLKWYQSMIR.H		H[+16], Y[+32]*2	750.571	5	3748.83	3748.83	0	-0.5	17	NRagged	99.48	99.48	0	3.23	1206	>sp|P02817|AMELX_BOVIN Amelogenin, X isoform OS=Bos taurus OX=9913 GN=AMELX PE=1 SV=2	1	hf1_10472_ebo_26_1_261219.ScanId;v=1;d1=28533.28533.6	controllerType=0 controllerNumber=1 scan=28533	58.9667
33946:4	1	S.MPLPPHPGHPGYINFS[+79.966]YEVLTPLKW[+31.990]YQ[+0.984]SMIR.H		Q[+1], S[+80], W[+32]	946.21	4	3781.82	3781.79	0	6.3	17	NRagged	103.28	71.66	0	2.18	1206	>sp|P02817|AMELX_BOVIN Amelogenin, X isoform OS=Bos taurus OX=9913 GN=AMELX PE=1 SV=2	1	hf1_10472_ebo_26_1_261219.ScanId;v=1;d1=25186.25186.4	controllerType=0 controllerNumber=1 scan=25186	52.971
39026:4	1	S.MPLPPHPGHPGY[+15.995]INFS[+79.966]YEVLTPLKWYQ[+0.984]SMIR.H		Q[+1], S[+80], Y[+16]	942.214	4	3765.83	3765.8	0	8.9	17	NRagged	126.83	126.83	0	2.51	1206	>sp|P02817|AMELX_BOVIN Amelogenin, X isoform OS=Bos taurus OX=9913 GN=AMELX PE=1 SV=2	1	hf1_10472_ebo_26_1_261219.ScanId;v=1;d1=28562.28562.4	controllerType=0 controllerNumber=1 scan=28562	59.0194
38527:5	1	S.MP[+15.995]LPPHPGHPGYINFS[+79.966]YEVLTPLKWYQ[+0.984]SMIR.H		P[+16], Q[+1], S[+80]	753.971	5	3765.82	3765.8	0	6.3	17	NRagged	161.79	161.79	4	5.55	1206	>sp|P02817|AMELX_BOVIN Amelogenin, X isoform OS=Bos taurus OX=9913 GN=AMELX PE=1 SV=2	1	hf1_10472_ebo_26_1_261219.ScanId;v=1;d1=28233.28233.5	controllerType=0 controllerNumber=1 scan=28233	58.4315
32307:5	1	S.MPLPPHPGHPGYINFS[+79.966]YEVLTPLKW[+31.990]YQSM[+15.995]IR.H		M[+16], S[+80], W[+32]	760.17	5	3796.82	3796.81	0	4.7	17	NRagged	192.61	192.61	24.01	5	1206	>sp|P02817|AMELX_BOVIN Amelogenin, X isoform OS=Bos taurus OX=9913 GN=AMELX PE=1 SV=2	1	hf1_10472_ebo_26_1_261219.ScanId;v=1;d1=24095.24095.5	controllerType=0 controllerNumber=1 scan=24095	51.0358
33379:4	1	S.MPLPPHPGHPGYINFS[+79.966]YEVLTP[+31.990]LKWYQSM[+15.995]IR.H		M[+16], P[+32], S[+80]	949.964	4	3796.83	3796.81	0	7.3	17	NRagged	200.74	200.74	13.96	5.29	1206	>sp|P02817|AMELX_BOVIN Amelogenin, X isoform OS=Bos taurus OX=9913 GN=AMELX PE=1 SV=2	1	hf1_10472_ebo_26_1_261219.ScanId;v=1;d1=24800.24800.4	controllerType=0 controllerNumber=1 scan=24800	52.282
29532:4	1	S.M[+15.995]PLPPHPGHPGYINFS[+79.966]YEVLTPLKWYQSM[+31.990]IR.H		M[+16][+32], S[+80]	949.963	4	3796.83	3796.81	0	6.9	17	NRagged	205.79	205.79	0	5.29	1206	>sp|P02817|AMELX_BOVIN Amelogenin, X isoform OS=Bos taurus OX=9913 GN=AMELX PE=1 SV=2	1	hf1_10472_ebo_26_1_261219.ScanId;v=1;d1=22228.22228.4	controllerType=0 controllerNumber=1 scan=22228	47.7596
35654:4	1	S.MPLPPHPGHPGYIN[+0.984]FS[+79.966]YEVLTPLKWY[+31.990]QSMIR.H		N[+1], S[+80], Y[+32]	946.211	4	3781.82	3781.79	0	7.6	17	NRagged	205.91	205.91	13.04	4.85	1206	>sp|P02817|AMELX_BOVIN Amelogenin, X isoform OS=Bos taurus OX=9913 GN=AMELX PE=1 SV=2	1	hf1_10472_ebo_26_1_261219.ScanId;v=1;d1=26354.26354.4	controllerType=0 controllerNumber=1 scan=26354	55.0745
34564:4	1	S.MPLPPHPGHPGYIN[+0.984]FS[+79.966]YEVLTPLKWYQSM[+15.995]IR.H		M[+16], N[+1], S[+80]	942.213	4	3765.83	3765.8	0	7.7	17	NRagged	211.61	211.61	9.12	5.49	1206	>sp|P02817|AMELX_BOVIN Amelogenin, X isoform OS=Bos taurus OX=9913 GN=AMELX PE=1 SV=2	1	hf1_10472_ebo_26_1_261219.ScanId;v=1;d1=25614.25614.4	controllerType=0 controllerNumber=1 scan=25614	53.741
34504:4	1	S.M[+15.995]PLPPHPGHPGYINFS[+79.966]YEVLTPLKW[+31.990]YQSMIR.H		M[+16], S[+80], W[+32]	949.964	4	3796.83	3796.81	0	7.4	17	NRagged	214.12	214.12	0	5.49	1206	>sp|P02817|AMELX_BOVIN Amelogenin, X isoform OS=Bos taurus OX=9913 GN=AMELX PE=1 SV=2	1	hf1_10472_ebo_26_1_261219.ScanId;v=1;d1=25573.25573.4	controllerType=0 controllerNumber=1 scan=25573	53.6679
30000:4	1	S.M[+15.995]PLPPHPGHPGYINFS[+79.966]YEVLTPLKWYQSM[+31.990]IR.H		M[+16][+32], S[+80]	949.961	4	3796.82	3796.81	0	3.9	17	NRagged	254.85	254.85	0	6.06	1206	>sp|P02817|AMELX_BOVIN Amelogenin, X isoform OS=Bos taurus OX=9913 GN=AMELX PE=1 SV=2	1	hf1_10472_ebo_26_1_261219.ScanId;v=1;d1=22554.22554.4	controllerType=0 controllerNumber=1 scan=22554	48.3253
36274:4	1	S.MPLPPHPGHPGYINFS[+79.966]YEVLTPLKWYQ[+0.984]SM[+15.995]IR.H		M[+16], Q[+1], S[+80]	942.208	4	3765.81	3765.8	0	2.5	17	NRagged	341.78	341.78	20.57	6.46	1206	>sp|P02817|AMELX_BOVIN Amelogenin, X isoform OS=Bos taurus OX=9913 GN=AMELX PE=1 SV=2	1	hf1_10472_ebo_26_1_261219.ScanId;v=1;d1=26759.26759.4	controllerType=0 controllerNumber=1 scan=26759	55.7974
31043:4	1	S.M[+15.995]PLPPHPGHPGYINFS[+79.966]YEVLTPLKWYQSM[+31.990]IR.H		M[+16][+32], S[+80]	949.963	4	3796.83	3796.81	0	6.5	17	NRagged	404.97	404.97	0	7.97	1206	>sp|P02817|AMELX_BOVIN Amelogenin, X isoform OS=Bos taurus OX=9913 GN=AMELX PE=1 SV=2	1	hf1_10472_ebo_26_1_261219.ScanId;v=1;d1=23269.23269.4	controllerType=0 controllerNumber=1 scan=23269	49.5863
30646:4	1	S.MPLPPHPGHPGYINFS[+79.966]YEVLTPLKW[+31.990]YQSM[+15.995]IR.H		M[+16], S[+80], W[+32]	949.964	4	3796.83	3796.81	0	7.1	17	NRagged	427	427	28.6	8.18	1206	>sp|P02817|AMELX_BOVIN Amelogenin, X isoform OS=Bos taurus OX=9913 GN=AMELX PE=1 SV=2	1	hf1_10472_ebo_26_1_261219.ScanId;v=1;d1=23004.23004.3	controllerType=0 controllerNumber=1 scan=23004	49.1194
32664:4	1	S.MPLPPHPGHPGY[+31.990]INFS[+79.966]YEVLTPLKWYQSM[+15.995]IR.H		M[+16], S[+80], Y[+32]	949.963	4	3796.83	3796.81	0	6.7	17	NRagged	477.03	477.03	3.55	8.24	1206	>sp|P02817|AMELX_BOVIN Amelogenin, X isoform OS=Bos taurus OX=9913 GN=AMELX PE=1 SV=2	1	hf1_10472_ebo_26_1_261219.ScanId;v=1;d1=24317.24317.4	controllerType=0 controllerNumber=1 scan=24317	51.4297
32029:4	1	S.MPLPPHPGHPGYINFS[+79.966]YEVLTPLKW[+31.990]YQSM[+15.995]IR.H		M[+16], S[+80], W[+32]	949.962	4	3796.82	3796.81	0	5.1	17	NRagged	487.44	487.44	14.54	8.23	1206	>sp|P02817|AMELX_BOVIN Amelogenin, X isoform OS=Bos taurus OX=9913 GN=AMELX PE=1 SV=2	1	hf1_10472_ebo_26_1_261219.ScanId;v=1;d1=23913.23913.4	controllerType=0 controllerNumber=1 scan=23913	50.7184
33654:4	1	S.MPLPPHPGHP[+15.995]GYINFS[+79.966]YEVLTPLKWYQSM[+15.995]IR.H		M[+16], P[+16], S[+80]	945.962	4	3780.82	3780.81	0	3.5	17	NRagged	546.94	546.94	2.43	8.74	1206	>sp|P02817|AMELX_BOVIN Amelogenin, X isoform OS=Bos taurus OX=9913 GN=AMELX PE=1 SV=2	1	hf1_10472_ebo_26_1_261219.ScanId;v=1;d1=24985.24985.4	controllerType=0 controllerNumber=1 scan=24985	52.6161
32936:5	1	S.M[+15.995]PLPPHPGHPGYINFS[+79.966]YEVLTPLKWYQSM[+15.995]IR.H		M[+16]*2, S[+80]	756.972	5	3780.83	3780.81	0	5.4	17	NRagged	593.07	593.07	0	10	1206	>sp|P02817|AMELX_BOVIN Amelogenin, X isoform OS=Bos taurus OX=9913 GN=AMELX PE=1 SV=2	1	hf1_10472_ebo_26_1_261219.ScanId;v=1;d1=24501.24501.5	controllerType=0 controllerNumber=1 scan=24501	51.7544
32340:4	1	S.MPLPPHPGHPGYINFS[+79.966]YEVLTPLKW[+31.990]YQSM[+15.995]IR.H		M[+16], S[+80], W[+32]	949.962	4	3796.83	3796.81	0	5.7	17	NRagged	614.92	614.92	21.97	10.96	1206	>sp|P02817|AMELX_BOVIN Amelogenin, X isoform OS=Bos taurus OX=9913 GN=AMELX PE=1 SV=2	1	hf1_10472_ebo_26_1_261219.ScanId;v=1;d1=24115.24115.4	controllerType=0 controllerNumber=1 scan=24115	51.0716
38185:4	1	S.M[+15.995]PLPPHPGHPGYIN[+0.984]FS[+79.966]YEVLTPLKWYQSMIR.H		M[+16], N[+1], S[+80]	942.211	4	3765.82	3765.8	0	6.3	17	NRagged	622.1	622.1	25.38	11.01	1206	>sp|P02817|AMELX_BOVIN Amelogenin, X isoform OS=Bos taurus OX=9913 GN=AMELX PE=1 SV=2	1	hf1_10472_ebo_26_1_261219.ScanId;v=1;d1=28014.28014.4	controllerType=0 controllerNumber=1 scan=28014	58.0427
35522:4	1	S.MPLPPHPGHPGYINFS[+79.966]YEVLTPLKWYQ[+0.984]SM[+15.995]IR.H		M[+16], Q[+1], S[+80]	942.211	4	3765.82	3765.8	0	5.9	17	NRagged	662.8	662.8	30.07	11.96	1206	>sp|P02817|AMELX_BOVIN Amelogenin, X isoform OS=Bos taurus OX=9913 GN=AMELX PE=1 SV=2	1	hf1_10472_ebo_26_1_261219.ScanId;v=1;d1=26262.26262.4	controllerType=0 controllerNumber=1 scan=26262	54.9079
32956:3	1	S.M[+15.995]PLPPHPGHPGYINFS[+79.966]YEVLTPLKWYQSM[+15.995]IR.H		M[+16]*2, S[+80]	1260.95	3	3780.84	3780.81	0	7.9	17	NRagged	792.59	792.59	0	13.16	1206	>sp|P02817|AMELX_BOVIN Amelogenin, X isoform OS=Bos taurus OX=9913 GN=AMELX PE=1 SV=2	1	hf1_10472_ebo_26_1_261219.ScanId;v=1;d1=24514.24514.3	controllerType=0 controllerNumber=1 scan=24514	51.7769
34949:4	1	S.MPLPPHPGHPGYIN[+0.984]FS[+79.966]YEVLTPLKWYQSM[+15.995]IR.H		M[+16], N[+1], S[+80]	942.212	4	3765.83	3765.8	0	6.8	17	NRagged	859.83	859.83	80.85	16.01	1206	>sp|P02817|AMELX_BOVIN Amelogenin, X isoform OS=Bos taurus OX=9913 GN=AMELX PE=1 SV=2	1	hf1_10472_ebo_26_1_261219.ScanId;v=1;d1=25876.25876.4	controllerType=0 controllerNumber=1 scan=25876	54.2167
30750:4	1	S.MPLPPHPGHPGYINFS[+79.966]YEVLTPLKW[+31.990]YQSM[+15.995]IR.H		M[+16], S[+80], W[+32]	949.963	4	3796.83	3796.81	0	6.6	17	NRagged	866.35	866.35	34.55	16.01	1206	>sp|P02817|AMELX_BOVIN Amelogenin, X isoform OS=Bos taurus OX=9913 GN=AMELX PE=1 SV=2	1	hf1_10472_ebo_26_1_261219.ScanId;v=1;d1=23074.23074.4	controllerType=0 controllerNumber=1 scan=23074	49.2439
38496:4	1	S.M[+15.995]PLPPHPGHPGYINFS[+79.966]YEVLTPLKWYQ[+0.984]SMIR.H		M[+16], Q[+1], S[+80]	942.212	4	3765.82	3765.8	0	6.7	17	NRagged	963.36	963.36	37.8	18.01	1206	>sp|P02817|AMELX_BOVIN Amelogenin, X isoform OS=Bos taurus OX=9913 GN=AMELX PE=1 SV=2	1	hf1_10472_ebo_26_1_261219.ScanId;v=1;d1=28214.28214.4	controllerType=0 controllerNumber=1 scan=28214	58.3997
33357:4	1	S.M[+15.995]PLPPHPGHPGYINFS[+79.966]YEVLTPLKWYQSM[+15.995]IR.H		M[+16]*2, S[+80]	945.964	4	3780.83	3780.81	0	6	17	NRagged	1027.36	1027.36	6.65	18.96	1206	>sp|P02817|AMELX_BOVIN Amelogenin, X isoform OS=Bos taurus OX=9913 GN=AMELX PE=1 SV=2	1	hf1_10472_ebo_26_1_261219.ScanId;v=1;d1=24785.24785.4	controllerType=0 controllerNumber=1 scan=24785	52.2565
35235:4	1	S.MPLPPHPGHPGYINFS[+79.966]YEVLTPLKWYQ[+0.984]SM[+15.995]IR.H		M[+16], Q[+1], S[+80]	942.212	4	3765.83	3765.8	0	7.3	17	NRagged	1096.53	1096.53	13.09	20.01	1206	>sp|P02817|AMELX_BOVIN Amelogenin, X isoform OS=Bos taurus OX=9913 GN=AMELX PE=1 SV=2	1	hf1_10472_ebo_26_1_261219.ScanId;v=1;d1=26068.26068.4	controllerType=0 controllerNumber=1 scan=26068	54.5637
33051:4	1	S.M[+15.995]PLPPHPGHPGYINFS[+79.966]YEVLTPLKWYQSM[+15.995]IR.H		M[+16]*2, S[+80]	945.962	4	3780.83	3780.81	0	4.6	17	NRagged	1156.07	1156.07	21.4	21.96	1206	>sp|P02817|AMELX_BOVIN Amelogenin, X isoform OS=Bos taurus OX=9913 GN=AMELX PE=1 SV=2	1	hf1_10472_ebo_26_1_261219.ScanId;v=1;d1=24582.24582.4	controllerType=0 controllerNumber=1 scan=24582	51.897
31328:4	1	S.MPLPPHPGHPGYINFS[+79.966]Y[+15.995]EVLTP[+31.990]LKW[+15.995]YQSMIR.H		P[+32], S[+80], W[+16], Y[+16]	953.962	4	3812.82	3812.8	0	6.2	17	NRagged	34.33	34.33	0	2.42	1206	>sp|P02817|AMELX_BOVIN Amelogenin, X isoform OS=Bos taurus OX=9913 GN=AMELX PE=1 SV=2	1	hf1_10472_ebo_26_1_261219.ScanId;v=1;d1=23455.23455.3	controllerType=0 controllerNumber=1 scan=23455	49.9142
35655:4	1	S.MPLPPHPGHPGYIN[+0.984]FS[+79.966]YEVLTP[+31.990]LKWYQ[+0.984]SMIR.H		N[+1], P[+32], Q[+1], S[+80]	946.458	4	3782.81	3782.78	0	8.8	17	NRagged	42.26	42.26	0	2.12	1206	>sp|P02817|AMELX_BOVIN Amelogenin, X isoform OS=Bos taurus OX=9913 GN=AMELX PE=1 SV=2	1	hf1_10472_ebo_26_1_261219.ScanId;v=1;d1=26354.26354.4	controllerType=0 controllerNumber=1 scan=26354	55.0745
33670:4	1	S.MPLPPHPGHPGYIN[+0.984]FS[+79.966]Y[+31.990]EVLTPLKWYQSM[+15.995]IR.H		M[+16], N[+1], S[+80], Y[+32]	950.21	4	3797.82	3797.79	0	7	17	NRagged	74.07	58.68	19.82	2.42	1206	>sp|P02817|AMELX_BOVIN Amelogenin, X isoform OS=Bos taurus OX=9913 GN=AMELX PE=1 SV=2	1	hf1_10472_ebo_26_1_261219.ScanId;v=1;d1=24996.24996.4	controllerType=0 controllerNumber=1 scan=24996	52.635
32259:4	1	S.MPLPPHPGHP[+31.990]GY[+15.995]INF[+31.990]SYEVLTPLKW[+15.995]YQSMIR.H		F[+32], P[+32], W[+16], Y[+16]	941.969	4	3764.85	3764.82	0	8.1	17	NRagged	111.39	111.39	3.08	2.36	1206	>sp|P02817|AMELX_BOVIN Amelogenin, X isoform OS=Bos taurus OX=9913 GN=AMELX PE=1 SV=2	1	hf1_10472_ebo_26_1_261219.ScanId;v=1;d1=24064.24064.3	controllerType=0 controllerNumber=1 scan=24064	50.9813
32735:4	1	S.MPLPPHPGHPGY[+15.995]INF[+31.990]SY[+31.990]EVLTPLKWY[+15.995]QSMIR.H		F[+32], Y[+16]*2[+32]	941.957	4	3764.81	3764.82	0	-4.7	17	NRagged	167.25	167.25	0.48	2.92	1206	>sp|P02817|AMELX_BOVIN Amelogenin, X isoform OS=Bos taurus OX=9913 GN=AMELX PE=1 SV=2	1	hf1_10472_ebo_26_1_261219.ScanId;v=1;d1=24364.24364.3	controllerType=0 controllerNumber=1 scan=24364	51.5114
32367:4	1	S.M[+15.995]PLPPHPGHPGYINFS[+79.966]YEVLTPLKWY[+15.995]QSM[+31.990]IR.H		M[+16][+32], S[+80], Y[+16]	953.957	4	3812.81	3812.8	0	1.7	17	NRagged	184.59	184.59	0.82	4.02	1206	>sp|P02817|AMELX_BOVIN Amelogenin, X isoform OS=Bos taurus OX=9913 GN=AMELX PE=1 SV=2	1	hf1_10472_ebo_26_1_261219.ScanId;v=1;d1=24131.24131.4	controllerType=0 controllerNumber=1 scan=24131	51.1013
31721:4	1	S.MPLPPHPGHPGYIN[+0.984]FS[+79.966]YEVLTPLKW[+31.990]YQSM[+15.995]IR.H		M[+16], N[+1], S[+80], W[+32]	950.209	4	3797.81	3797.79	0	6.2	17	NRagged	191.42	191.42	12.01	5.01	1206	>sp|P02817|AMELX_BOVIN Amelogenin, X isoform OS=Bos taurus OX=9913 GN=AMELX PE=1 SV=2	1	hf1_10472_ebo_26_1_261219.ScanId;v=1;d1=23708.23708.4	controllerType=0 controllerNumber=1 scan=23708	50.36
32510:4	1	S.MPLPPHPGHP[+15.995]GY[+31.990]INF[+31.990]SYEVLTPLKW[+15.995]YQSMIR.H		F[+32], P[+16], W[+16], Y[+32]	941.969	4	3764.85	3764.82	0	7.9	17	NRagged	230.81	230.81	2.75	5.29	1206	>sp|P02817|AMELX_BOVIN Amelogenin, X isoform OS=Bos taurus OX=9913 GN=AMELX PE=1 SV=2	1	hf1_10472_ebo_26_1_261219.ScanId;v=1;d1=24218.24218.4	controllerType=0 controllerNumber=1 scan=24218	51.2523
37185:5	1	S.MP[+15.995]LPPHPGHP[+15.995]GY[+31.990]INFSY[+31.990]EVLTPLKWYQSMIR.H		P[+16]*2, Y[+32]*2	753.774	5	3764.84	3764.82	0	5	17	NRagged	281.71	281.71	0	7.25	1206	>sp|P02817|AMELX_BOVIN Amelogenin, X isoform OS=Bos taurus OX=9913 GN=AMELX PE=1 SV=2	1	hf1_10472_ebo_26_1_261219.ScanId;v=1;d1=27358.27358.5	controllerType=0 controllerNumber=1 scan=27358	56.868
38936:5	1	S.MPLPPHPGHP[+31.990]GY[+31.990]IN[+0.984]F[+15.995]SYEVLTPLKWYQSMIR.H		F[+16], N[+1], P[+32], Y[+32]	750.771	5	3749.83	3749.81	0	3.4	17	NRagged	287.38	287.38	2	6.71	1206	>sp|P02817|AMELX_BOVIN Amelogenin, X isoform OS=Bos taurus OX=9913 GN=AMELX PE=1 SV=2	1	hf1_10472_ebo_26_1_261219.ScanId;v=1;d1=28501.28501.5	controllerType=0 controllerNumber=1 scan=28501	58.9096
37029:4	1	S.MP[+15.995]LPPHPGHPGYINFS[+79.966]YEVLTPLKW[+31.990]YQSM[+15.995]IR.H		M[+16], P[+16], S[+80], W[+32]	953.963	4	3812.83	3812.8	0	7.5	17	NRagged	364.28	364.28	1.8	7.95	1206	>sp|P02817|AMELX_BOVIN Amelogenin, X isoform OS=Bos taurus OX=9913 GN=AMELX PE=1 SV=2	1	hf1_10472_ebo_26_1_261219.ScanId;v=1;d1=27259.27259.4	controllerType=0 controllerNumber=1 scan=27259	56.6939
31183:5	1	S.MP[+15.995]LPPHPGHPGYINFS[+79.966]YEVLTPLKW[+31.990]YQSM[+15.995]IR.H		M[+16], P[+16], S[+80], W[+32]	763.37	5	3812.82	3812.8	0	5.9	17	NRagged	446.12	446.12	1.8	9.05	1206	>sp|P02817|AMELX_BOVIN Amelogenin, X isoform OS=Bos taurus OX=9913 GN=AMELX PE=1 SV=2	1	hf1_10472_ebo_26_1_261219.ScanId;v=1;d1=23359.23359.5	controllerType=0 controllerNumber=1 scan=23359	49.744
31316:5	1	S.MP[+15.995]LPPHPGHPGYINFS[+79.966]YEVLTPLKWYQSM[+15.995]IRH.P		M[+16], P[+16], S[+80]	784.385	5	3917.9	3917.87	0	6.8	17	Non	270.99	270.99	1.8	5.34	1206	>sp|P02817|AMELX_BOVIN Amelogenin, X isoform OS=Bos taurus OX=9913 GN=AMELX PE=1 SV=2	1	hf1_10472_ebo_26_1_261219.ScanId;v=1;d1=23448.23448.5	controllerType=0 controllerNumber=1 scan=23448	49.9009
35971:5	1	S.MPLPPHPGHP[+15.995]GY[+31.990]INF[+31.990]SYEVLTPLKWYQSMIRH.P		F[+32], P[+16], Y[+32]	777.986	5	3885.9	3885.89	0	3.3	17	Non	412.61	412.61	0	6.64	1206	>sp|P02817|AMELX_BOVIN Amelogenin, X isoform OS=Bos taurus OX=9913 GN=AMELX PE=1 SV=2	1	hf1_10472_ebo_26_1_261219.ScanId;v=1;d1=26561.26561.5	controllerType=0 controllerNumber=1 scan=26561	55.442
32529:5	1	S.MPLP[+15.995]PHP[+31.990]GHP[+31.990]GYINFSYEVLTPLKWYQSM[+15.995]IRH.P		M[+16], P[+16][+32]*2	781.187	5	3901.9	3901.88	0	5.6	17	Non	85.27	85.27	0	2.16	1206	>sp|P02817|AMELX_BOVIN Amelogenin, X isoform OS=Bos taurus OX=9913 GN=AMELX PE=1 SV=2	1	hf1_10472_ebo_26_1_261219.ScanId;v=1;d1=24231.24231.5	controllerType=0 controllerNumber=1 scan=24231	51.2747
34041:6	1	S.MPLPPHPGHPGYINFSYEVLTPLKWYQSMIRHPYP.S			694.687	6	4163.08	4163.08	0	0.2	17	Non	117.62	117.62	27.74	2.26	1206	>sp|P02817|AMELX_BOVIN Amelogenin, X isoform OS=Bos taurus OX=9913 GN=AMELX PE=1 SV=2	1	hf1_10472_ebo_26_1_261219.ScanId;v=1;d1=25250.25250.6	controllerType=0 controllerNumber=1 scan=25250	53.0832
33828:5	1	S.MPLPPHPGHPGYINFSYEVLTPLKWYQSMIRHPYP.S			833.422	5	4163.08	4163.08	0	-0.7	17	Non	249.15	249.15	59.41	4.47	1206	>sp|P02817|AMELX_BOVIN Amelogenin, X isoform OS=Bos taurus OX=9913 GN=AMELX PE=1 SV=2	1	hf1_10472_ebo_26_1_261219.ScanId;v=1;d1=25104.25104.5	controllerType=0 controllerNumber=1 scan=25104	52.8239
35324:6	1	S.MPLPPHPGHPGYINFSYEVLTPLKWYQSMIRHPYP.S			694.692	6	4163.12	4163.08	0	8.5	17	Non	249.19	249.19	249.19	5.37	1206	>sp|P02817|AMELX_BOVIN Amelogenin, X isoform OS=Bos taurus OX=9913 GN=AMELX PE=1 SV=2	1	hf1_10472_ebo_26_1_261219.ScanId;v=1;d1=26129.26129.6	controllerType=0 controllerNumber=1 scan=26129	54.671
35428:5	1	S.MPLPPHPGHPGYINFSYEVLTPLKWYQSMIRHPYP.S			833.228	5	4162.11	4163.08	-1	7.2	17	Non	369.34	369.34	369.34	6.93	1206	>sp|P02817|AMELX_BOVIN Amelogenin, X isoform OS=Bos taurus OX=9913 GN=AMELX PE=1 SV=2	1	hf1_10472_ebo_26_1_261219.ScanId;v=1;d1=26200.26200.4	controllerType=0 controllerNumber=1 scan=26200	54.7979
33187:6	1	S.MPLPPHPGHPGYINFSYEVLTPLK[+15.995]WYQSMIRHPYP.S		K[+16]	697.187	6	4178.08	4179.08	-1	2.6	17	Non	111.14	104.94	0	2.27	1206	>sp|P02817|AMELX_BOVIN Amelogenin, X isoform OS=Bos taurus OX=9913 GN=AMELX PE=1 SV=2	1	hf1_10472_ebo_26_1_261219.ScanId;v=1;d1=24670.24670.6	controllerType=0 controllerNumber=1 scan=24670	52.0559
31987:5	1	S.MPLPPHPGHPGYINFSYEVLTPLKWYQSM[+15.995]IRHPYP.S		M[+16]	836.425	5	4178.09	4179.08	-1	4.8	17	Non	151.57	151.57	0.28	2.59	1206	>sp|P02817|AMELX_BOVIN Amelogenin, X isoform OS=Bos taurus OX=9913 GN=AMELX PE=1 SV=2	1	hf1_10472_ebo_26_1_261219.ScanId;v=1;d1=23885.23885.3	controllerType=0 controllerNumber=1 scan=23885	50.6678
31906:4	1	S.MPLPPHPGHPGYINFSYEVLTPLKWYQSM[+15.995]IRHPYP.S		M[+16]	1045.28	4	4178.09	4179.08	-1	3.1	17	Non	156.52	101.99	7.77	1.68	1206	>sp|P02817|AMELX_BOVIN Amelogenin, X isoform OS=Bos taurus OX=9913 GN=AMELX PE=1 SV=2	1	hf1_10472_ebo_26_1_261219.ScanId;v=1;d1=23835.23835.4	controllerType=0 controllerNumber=1 scan=23835	50.5824
37362:6	1	S.MPLPPHPGHPGYINFS[+79.966]YEVLTPLKWYQSMIRHPYP.S		S[+80]	707.851	6	4242.07	4243.05	-1	6.2	17	Non	169.14	169.14	28.48	4.02	1206	>sp|P02817|AMELX_BOVIN Amelogenin, X isoform OS=Bos taurus OX=9913 GN=AMELX PE=1 SV=2	1	hf1_10472_ebo_26_1_261219.ScanId;v=1;d1=27467.27467.6	controllerType=0 controllerNumber=1 scan=27467	57.0605
32889:6	1	S.MPLPPHPGHPGYINFSYEVLTPLKWYQSM[+15.995]IRHPYP.S		M[+16]	697.184	6	4178.07	4179.08	-1	-1	17	Non	216.56	176.14	8.7	3	1206	>sp|P02817|AMELX_BOVIN Amelogenin, X isoform OS=Bos taurus OX=9913 GN=AMELX PE=1 SV=2	1	hf1_10472_ebo_26_1_261219.ScanId;v=1;d1=24470.24470.6	controllerType=0 controllerNumber=1 scan=24470	51.6994
31784:4	1	S.M[+15.995]PLPPHPGHPGYINFSYEVLTPLKWYQSMIRHPYP.S		M[+16]	1045.53	4	4179.09	4179.08	0	2.5	17	Non	284.8	284.8	9.72	4.14	1206	>sp|P02817|AMELX_BOVIN Amelogenin, X isoform OS=Bos taurus OX=9913 GN=AMELX PE=1 SV=2	1	hf1_10472_ebo_26_1_261219.ScanId;v=1;d1=23751.23751.4	controllerType=0 controllerNumber=1 scan=23751	50.435
31535:6	1	S.MPLPPHPGHPGYINFSYEVLTPLKWY[+15.995]QSMIRHPYP.S		Y[+16]	697.19	6	4178.1	4179.08	-1	6.9	17	Non	327.26	203.75	0	5.41	1206	>sp|P02817|AMELX_BOVIN Amelogenin, X isoform OS=Bos taurus OX=9913 GN=AMELX PE=1 SV=2	1	hf1_10472_ebo_26_1_261219.ScanId;v=1;d1=23588.23588.6	controllerType=0 controllerNumber=1 scan=23588	50.1467
36759:6	1	S.MPLPPHPGHPGYINFS[+79.966]YEVLTPLKWYQSMIRHPYP.S		S[+80]	708.018	6	4243.07	4243.05	0	5.8	17	Non	374.47	374.47	63.64	7.08	1206	>sp|P02817|AMELX_BOVIN Amelogenin, X isoform OS=Bos taurus OX=9913 GN=AMELX PE=1 SV=2	1	hf1_10472_ebo_26_1_261219.ScanId;v=1;d1=27078.27078.6	controllerType=0 controllerNumber=1 scan=27078	56.3671
37042:6	1	S.MPLPPHPGHPGYINFS[+79.966]YEVLTPLKWYQSMIRHPYP.S		S[+80]	708.018	6	4243.07	4243.05	0	5.6	17	Non	418.76	418.76	41.11	7.8	1206	>sp|P02817|AMELX_BOVIN Amelogenin, X isoform OS=Bos taurus OX=9913 GN=AMELX PE=1 SV=2	1	hf1_10472_ebo_26_1_261219.ScanId;v=1;d1=27268.27268.6	controllerType=0 controllerNumber=1 scan=27268	56.7104
37945:5	1	S.MPLPPHPGHPGYINFS[+79.966]YEVLTPLKWYQSMIRHPYP.S		S[+80]	849.619	5	4244.06	4243.05	1	2.8	17	Non	755.4	755.4	11.54	12.35	1206	>sp|P02817|AMELX_BOVIN Amelogenin, X isoform OS=Bos taurus OX=9913 GN=AMELX PE=1 SV=2	1	hf1_10472_ebo_26_1_261219.ScanId;v=1;d1=27857.27857.5	controllerType=0 controllerNumber=1 scan=27857	57.7591
46257:5	1	S.MPLPPHPGHPGYINFS[+79.966]YEVLTPLKWYQSMIRHPYP.S		S[+80]	849.423	5	4243.09	4243.05	0	9.3	17	Non	844.3	844.3	153.68	13.51	1206	>sp|P02817|AMELX_BOVIN Amelogenin, X isoform OS=Bos taurus OX=9913 GN=AMELX PE=1 SV=2	1	hf1_10472_ebo_26_1_261219.ScanId;v=1;d1=34398.34398.5	controllerType=0 controllerNumber=1 scan=34398	73.6382
36727:4	1	S.MPLPPHPGHPGYINFS[+79.966]YEVLTPLKWYQSMIRHPYP.S		S[+80]	1061.52	4	4243.07	4243.05	0	5.9	17	Non	855.4	855.4	176.53	13.93	1206	>sp|P02817|AMELX_BOVIN Amelogenin, X isoform OS=Bos taurus OX=9913 GN=AMELX PE=1 SV=2	1	hf1_10472_ebo_26_1_261219.ScanId;v=1;d1=27058.27058.4	controllerType=0 controllerNumber=1 scan=27058	56.3312
38234:5	1	S.MPLPPHPGHPGYINFS[+79.966]YEVLTPLKWYQSMIRHPYP.S		S[+80]	849.619	5	4244.06	4243.05	1	2.9	17	Non	858.87	858.87	70.11	14.35	1206	>sp|P02817|AMELX_BOVIN Amelogenin, X isoform OS=Bos taurus OX=9913 GN=AMELX PE=1 SV=2	1	hf1_10472_ebo_26_1_261219.ScanId;v=1;d1=28046.28046.5	controllerType=0 controllerNumber=1 scan=28046	58.0997
36773:5	1	S.MPLPPHPGHPGYINFS[+79.966]YEVLTPLKWYQSMIRHPYP.S		S[+80]	849.421	5	4243.08	4243.05	0	6.9	17	Non	886.47	886.47	179.39	14.82	1206	>sp|P02817|AMELX_BOVIN Amelogenin, X isoform OS=Bos taurus OX=9913 GN=AMELX PE=1 SV=2	1	hf1_10472_ebo_26_1_261219.ScanId;v=1;d1=27088.27088.5	controllerType=0 controllerNumber=1 scan=27088	56.385
37059:5	1	S.MPLPPHPGHPGYINFS[+79.966]YEVLTPLKWYQSMIRHPYP.S		S[+80]	849.423	5	4243.08	4243.05	0	8.2	17	Non	930.72	930.72	183.34	15.51	1206	>sp|P02817|AMELX_BOVIN Amelogenin, X isoform OS=Bos taurus OX=9913 GN=AMELX PE=1 SV=2	1	hf1_10472_ebo_26_1_261219.ScanId;v=1;d1=27279.27279.5	controllerType=0 controllerNumber=1 scan=27279	56.7298
37324:4	1	S.MPLPPHPGHPGYINFS[+79.966]YEVLTPLKWYQSMIRHPYP.S		S[+80]	1061.52	4	4243.08	4243.05	0	6.6	17	Non	1076.77	1076.77	327.68	17.97	1206	>sp|P02817|AMELX_BOVIN Amelogenin, X isoform OS=Bos taurus OX=9913 GN=AMELX PE=1 SV=2	1	hf1_10472_ebo_26_1_261219.ScanId;v=1;d1=27444.27444.4	controllerType=0 controllerNumber=1 scan=27444	57.0203
38200:4	1	S.MPLPPHPGHPGYINFS[+79.966]YEVLTPLKWYQSMIRHPYP.S		S[+80]	1061.77	4	4244.05	4243.05	1	0.3	17	Non	1099.24	1099.24	34.74	17.09	1206	>sp|P02817|AMELX_BOVIN Amelogenin, X isoform OS=Bos taurus OX=9913 GN=AMELX PE=1 SV=2	1	hf1_10472_ebo_26_1_261219.ScanId;v=1;d1=28024.28024.4	controllerType=0 controllerNumber=1 scan=28024	58.0607
37019:4	1	S.MPLPPHPGHPGYINFS[+79.966]YEVLTPLKWYQSMIRHPYP.S		S[+80]	1061.52	4	4243.08	4243.05	0	6.9	17	Non	1363.03	1363.03	461.84	23.97	1206	>sp|P02817|AMELX_BOVIN Amelogenin, X isoform OS=Bos taurus OX=9913 GN=AMELX PE=1 SV=2	1	hf1_10472_ebo_26_1_261219.ScanId;v=1;d1=27252.27252.4	controllerType=0 controllerNumber=1 scan=27252	56.6805
36667:6	1	S.MPLPPHP[+15.995]GHPGYINFS[+79.966]YEVLTPLKWYQSMIRHPYP.S		P[+16], S[+80]	710.684	6	4259.07	4259.04	0	5.4	17	Non	81.49	81.49	0	2.46	1206	>sp|P02817|AMELX_BOVIN Amelogenin, X isoform OS=Bos taurus OX=9913 GN=AMELX PE=1 SV=2	1	hf1_10472_ebo_26_1_261219.ScanId;v=1;d1=27021.27021.6	controllerType=0 controllerNumber=1 scan=27021	56.264
33788:6	1	S.MPLPPHPGHPGYINFS[+79.966]YEVLTPLKWY[+15.995]QSMIRHPYP.S		S[+80], Y[+16]	710.683	6	4259.06	4259.04	0	4.1	17	Non	107.32	107.32	0	2.28	1206	>sp|P02817|AMELX_BOVIN Amelogenin, X isoform OS=Bos taurus OX=9913 GN=AMELX PE=1 SV=2	1	hf1_10472_ebo_26_1_261219.ScanId;v=1;d1=25076.25076.6	controllerType=0 controllerNumber=1 scan=25076	52.7742
31382:4	1	S.MPLPPHPGHPGYINFS[+79.966]YEVLTPLKWY[+15.995]QSMIRHPYP.S		S[+80], Y[+16]	1065.27	4	4258.07	4259.04	-1	7.8	17	Non	125.43	125.43	1.8	2.24	1206	>sp|P02817|AMELX_BOVIN Amelogenin, X isoform OS=Bos taurus OX=9913 GN=AMELX PE=1 SV=2	1	hf1_10472_ebo_26_1_261219.ScanId;v=1;d1=23491.23491.4	controllerType=0 controllerNumber=1 scan=23491	49.9772
46260:6	1	S.MPLPPHPGHPGYINFS[+79.966]YEVLTPLKWY[+15.995]QSMIRHPYP.S		S[+80], Y[+16]	710.686	6	4259.08	4259.04	0	8.7	17	Non	134.67	134.67	0	2.47	1206	>sp|P02817|AMELX_BOVIN Amelogenin, X isoform OS=Bos taurus OX=9913 GN=AMELX PE=1 SV=2	1	hf1_10472_ebo_26_1_261219.ScanId;v=1;d1=34400.34400.6	controllerType=0 controllerNumber=1 scan=34400	73.6412
34501:6	1	S.MPLPPHPGHPGYINFS[+79.966]YEVLTPLK[+15.995]WYQSMIRHPYP.S		K[+16], S[+80]	710.848	6	4260.05	4259.04	1	1.4	17	Non	137.17	137.17	0	2.22	1206	>sp|P02817|AMELX_BOVIN Amelogenin, X isoform OS=Bos taurus OX=9913 GN=AMELX PE=1 SV=2	1	hf1_10472_ebo_26_1_261219.ScanId;v=1;d1=25572.25572.6	controllerType=0 controllerNumber=1 scan=25572	53.6664
31355:4	1	S.MPLPPHPGHPGYINFS[+79.966]YEVLTPLK[+15.995]WYQSMIRHPYP.S		K[+16], S[+80]	1065.52	4	4259.06	4259.04	0	5	17	Non	158.29	158.29	0	2.24	1206	>sp|P02817|AMELX_BOVIN Amelogenin, X isoform OS=Bos taurus OX=9913 GN=AMELX PE=1 SV=2	1	hf1_10472_ebo_26_1_261219.ScanId;v=1;d1=23473.23473.4	controllerType=0 controllerNumber=1 scan=23473	49.9442
33341:6	1	S.MPLPPHPGHPGYINFS[+79.966]YEVLTPLKWYQSM[+15.995]IRHPYP.S		M[+16], S[+80]	710.517	6	4258.06	4259.04	-1	5.4	17	Non	158.99	158.99	11.74	2.95	1206	>sp|P02817|AMELX_BOVIN Amelogenin, X isoform OS=Bos taurus OX=9913 GN=AMELX PE=1 SV=2	1	hf1_10472_ebo_26_1_261219.ScanId;v=1;d1=24774.24774.6	controllerType=0 controllerNumber=1 scan=24774	52.2384
29552:5	1	S.MPLPPHPGHPGYINFS[+79.966]YEVLTPLKWY[+31.990]QSMIRHPYP.S		S[+80], Y[+32]	855.819	5	4275.07	4275.04	0	6.3	17	Non	210.71	210.71	0	4.31	1206	>sp|P02817|AMELX_BOVIN Amelogenin, X isoform OS=Bos taurus OX=9913 GN=AMELX PE=1 SV=2	1	hf1_10472_ebo_26_1_261219.ScanId;v=1;d1=22242.22242.5	controllerType=0 controllerNumber=1 scan=22242	47.7834
33609:5	1	S.MPLPPHPGHPGYINFS[+79.966]YEVLTPLKW[+15.995]YQSMIRHPYP.S		S[+80], W[+16]	852.617	5	4259.05	4259.04	0	2.6	17	Non	214.72	214.72	0	3.65	1206	>sp|P02817|AMELX_BOVIN Amelogenin, X isoform OS=Bos taurus OX=9913 GN=AMELX PE=1 SV=2	1	hf1_10472_ebo_26_1_261219.ScanId;v=1;d1=24953.24953.3	controllerType=0 controllerNumber=1 scan=24953	52.5593
28952:5	1	S.MPLPPHPGHPGYINFS[+79.966]YEVLTPLKW[+31.990]YQSMIRHPYP.S		S[+80], W[+32]	855.618	5	4274.06	4275.04	-1	5.8	17	Non	214.84	214.84	0	4.22	1206	>sp|P02817|AMELX_BOVIN Amelogenin, X isoform OS=Bos taurus OX=9913 GN=AMELX PE=1 SV=2	1	hf1_10472_ebo_26_1_261219.ScanId;v=1;d1=21838.21838.5	controllerType=0 controllerNumber=1 scan=21838	47.0776
38212:5	1	S.MPLPPHPGHPGY[+31.990]INF[+31.990]SYEVLTPLKWYQSMIRHPYP.S		F[+32], Y[+32]	846.013	5	4226.03	4227.06	-1	-5.6	17	Non	218.48	218.48	0.28	2.88	1206	>sp|P02817|AMELX_BOVIN Amelogenin, X isoform OS=Bos taurus OX=9913 GN=AMELX PE=1 SV=2	1	hf1_10472_ebo_26_1_261219.ScanId;v=1;d1=28031.28031.5	controllerType=0 controllerNumber=1 scan=28031	58.0713
33920:6	1	S.MPLPPHPGHPGYINFS[+79.966]YEVLTPLKWY[+15.995]QSMIRHPYP.S		S[+80], Y[+16]	710.681	6	4259.05	4259.04	0	2	17	Non	224.61	224.61	0.43	3.37	1206	>sp|P02817|AMELX_BOVIN Amelogenin, X isoform OS=Bos taurus OX=9913 GN=AMELX PE=1 SV=2	1	hf1_10472_ebo_26_1_261219.ScanId;v=1;d1=25168.25168.6	controllerType=0 controllerNumber=1 scan=25168	52.9382
36364:6	1	S.MP[+15.995]LPPHPGHPGYINFS[+79.966]YEVLTPLKWYQSMIRHPYP.S		P[+16], S[+80]	710.685	6	4259.07	4259.04	0	7.3	17	Non	228.7	228.7	5.8	4.44	1206	>sp|P02817|AMELX_BOVIN Amelogenin, X isoform OS=Bos taurus OX=9913 GN=AMELX PE=1 SV=2	1	hf1_10472_ebo_26_1_261219.ScanId;v=1;d1=26822.26822.6	controllerType=0 controllerNumber=1 scan=26822	55.9096
38256:6	1	S.MPLPPHPGHPGYINFS[+79.966]YEVLTPLKWYQ[+0.984]SMIRHPYP.S		Q[+1], S[+80]	708.182	6	4244.06	4244.03	0	5.6	17	Non	232.97	232.97	25.13	4.4	1206	>sp|P02817|AMELX_BOVIN Amelogenin, X isoform OS=Bos taurus OX=9913 GN=AMELX PE=1 SV=2	1	hf1_10472_ebo_26_1_261219.ScanId;v=1;d1=28058.28058.6	controllerType=0 controllerNumber=1 scan=28058	58.1207
33666:4	1	S.MPLPPHPGHPGYINFS[+79.966]YEVLTPLKWYQSM[+15.995]IRHPYP.S		M[+16], S[+80]	1065.77	4	4260.05	4259.04	1	1.5	17	Non	243.69	243.69	5.53	3.51	1206	>sp|P02817|AMELX_BOVIN Amelogenin, X isoform OS=Bos taurus OX=9913 GN=AMELX PE=1 SV=2	1	hf1_10472_ebo_26_1_261219.ScanId;v=1;d1=24993.24993.4	controllerType=0 controllerNumber=1 scan=24993	52.6277
34699:5	1	S.MPLPPHPGHPGYINFS[+79.966]YEVLTP[+15.995]LKWYQSMIRHPYP.S		P[+16], S[+80]	852.416	5	4258.05	4259.04	-1	2.9	17	Non	266.15	266.15	1.2	4.83	1206	>sp|P02817|AMELX_BOVIN Amelogenin, X isoform OS=Bos taurus OX=9913 GN=AMELX PE=1 SV=2	1	hf1_10472_ebo_26_1_261219.ScanId;v=1;d1=25710.25710.5	controllerType=0 controllerNumber=1 scan=25710	53.9172
34651:4	1	S.MPLPPHPGHPGYINFS[+79.966]YEVLTP[+31.990]LKWYQSMIRHPYP.S		P[+32], S[+80]	1069.77	4	4276.06	4275.04	1	4.1	17	Non	280.88	280.88	5.35	4.14	1206	>sp|P02817|AMELX_BOVIN Amelogenin, X isoform OS=Bos taurus OX=9913 GN=AMELX PE=1 SV=2	1	hf1_10472_ebo_26_1_261219.ScanId;v=1;d1=25677.25677.4	controllerType=0 controllerNumber=1 scan=25677	53.8514
30420:5	1	S.MPLPPHPGHPGYINFS[+79.966]YEVLTPLKW[+31.990]YQSMIRHPYP.S		S[+80], W[+32]	855.818	5	4275.06	4275.04	0	5.3	17	Non	291.53	291.53	0	5.61	1206	>sp|P02817|AMELX_BOVIN Amelogenin, X isoform OS=Bos taurus OX=9913 GN=AMELX PE=1 SV=2	1	hf1_10472_ebo_26_1_261219.ScanId;v=1;d1=22851.22851.5	controllerType=0 controllerNumber=1 scan=22851	48.8473
33311:5	1	S.MPLPPHPGHPGYINFS[+79.966]YEVLTPLKWYQSM[+15.995]IRHPYP.S		M[+16], S[+80]	852.62	5	4259.07	4259.04	0	6.7	17	Non	305.34	305.34	9.23	5.65	1206	>sp|P02817|AMELX_BOVIN Amelogenin, X isoform OS=Bos taurus OX=9913 GN=AMELX PE=1 SV=2	1	hf1_10472_ebo_26_1_261219.ScanId;v=1;d1=24753.24753.3	controllerType=0 controllerNumber=1 scan=24753	52.2025
35997:5	1	S.M[+15.995]PLPPHPGHPGYINFS[+79.966]YEVLTPLKWYQSMIRHPYP.S		M[+16], S[+80]	852.618	5	4259.06	4259.04	0	4.2	17	Non	321.6	321.6	4.17	5.7	1206	>sp|P02817|AMELX_BOVIN Amelogenin, X isoform OS=Bos taurus OX=9913 GN=AMELX PE=1 SV=2	1	hf1_10472_ebo_26_1_261219.ScanId;v=1;d1=26579.26579.5	controllerType=0 controllerNumber=1 scan=26579	55.4776
39316:5	1	S.MPLPPHPGHPGYINFS[+79.966]YEVLTPLKWYQ[+0.984]SMIRHPYP.S		Q[+1], S[+80]	849.615	5	4244.05	4244.03	0	3.7	17	Non	332.95	332.95	30.61	5.58	1206	>sp|P02817|AMELX_BOVIN Amelogenin, X isoform OS=Bos taurus OX=9913 GN=AMELX PE=1 SV=2	1	hf1_10472_ebo_26_1_261219.ScanId;v=1;d1=28756.28756.5	controllerType=0 controllerNumber=1 scan=28756	59.3657
39492:4	1	S.MPLPPHPGHPGYINFS[+79.966]YEVLTPLKWYQ[+0.984]SMIRHPYP.S		Q[+1], S[+80]	1062.02	4	4245.04	4244.03	1	1	17	Non	337.07	337.07	43.05	4	1206	>sp|P02817|AMELX_BOVIN Amelogenin, X isoform OS=Bos taurus OX=9913 GN=AMELX PE=1 SV=2	1	hf1_10472_ebo_26_1_261219.ScanId;v=1;d1=28871.28871.4	controllerType=0 controllerNumber=1 scan=28871	59.572
36059:6	1	S.MP[+15.995]LPPHPGHPGYINFS[+79.966]YEVLTPLKWYQSMIRHPYP.S		P[+16], S[+80]	710.515	6	4258.06	4259.04	-1	3.5	17	Non	353.09	353.09	5.8	5.58	1206	>sp|P02817|AMELX_BOVIN Amelogenin, X isoform OS=Bos taurus OX=9913 GN=AMELX PE=1 SV=2	1	hf1_10472_ebo_26_1_261219.ScanId;v=1;d1=26621.26621.6	controllerType=0 controllerNumber=1 scan=26621	55.5523
32748:6	1	S.MPLPPHPGHPGYINFS[+79.966]YEVLTPLKWY[+15.995]QSMIRHPYP.S		S[+80], Y[+16]	710.684	6	4259.07	4259.04	0	5.6	17	Non	360.67	360.67	0	6.96	1206	>sp|P02817|AMELX_BOVIN Amelogenin, X isoform OS=Bos taurus OX=9913 GN=AMELX PE=1 SV=2	1	hf1_10472_ebo_26_1_261219.ScanId;v=1;d1=24374.24374.6	controllerType=0 controllerNumber=1 scan=24374	51.5291
31416:5	1	S.MPLPPHPGHPGYINFS[+79.966]YEVLTPLKW[+15.995]YQSMIRHPYP.S		S[+80], W[+16]	852.62	5	4259.07	4259.04	0	6.9	17	Non	373.51	373.51	0	6.77	1206	>sp|P02817|AMELX_BOVIN Amelogenin, X isoform OS=Bos taurus OX=9913 GN=AMELX PE=1 SV=2	1	hf1_10472_ebo_26_1_261219.ScanId;v=1;d1=23513.23513.5	controllerType=0 controllerNumber=1 scan=23513	50.0156
34999:5	1	S.MPLPPHPGHPGYINFS[+79.966]YEVLTPLKW[+15.995]YQSMIRHPYP.S		S[+80], W[+16]	852.621	5	4259.07	4259.04	0	7.1	17	Non	430.38	430.38	0	6.99	1206	>sp|P02817|AMELX_BOVIN Amelogenin, X isoform OS=Bos taurus OX=9913 GN=AMELX PE=1 SV=2	1	hf1_10472_ebo_26_1_261219.ScanId;v=1;d1=25909.25909.5	controllerType=0 controllerNumber=1 scan=25909	54.2806
30813:6	1	S.MP[+15.995]LPPHPGHPGYINFSYEVLTPLKWYQSM[+15.995]IRHPYP.S		M[+16], P[+16]	699.856	6	4194.1	4195.07	-1	6.6	17	Non	538.47	538.47	1.8	8.01	1206	>sp|P02817|AMELX_BOVIN Amelogenin, X isoform OS=Bos taurus OX=9913 GN=AMELX PE=1 SV=2	1	hf1_10472_ebo_26_1_261219.ScanId;v=1;d1=23118.23118.6	controllerType=0 controllerNumber=1 scan=23118	49.3214
33036:6	1	S.MPLPPHPGHPGYINFS[+79.966]YEVLTPLKWYQSM[+15.995]IRHPYP.S		M[+16], S[+80]	710.684	6	4259.07	4259.04	0	5.5	17	Non	551.18	551.18	10.44	7.3	1206	>sp|P02817|AMELX_BOVIN Amelogenin, X isoform OS=Bos taurus OX=9913 GN=AMELX PE=1 SV=2	1	hf1_10472_ebo_26_1_261219.ScanId;v=1;d1=24571.24571.6	controllerType=0 controllerNumber=1 scan=24571	51.8776
36942:4	1	S.MPLPPHPGHPGYINFS[+79.966]Y[+15.995]EVLTPLKWYQSMIRHPYP.S		S[+80], Y[+16]	1065.52	4	4259.06	4259.04	0	3.5	17	Non	572.93	572.93	4.45	6.8	1206	>sp|P02817|AMELX_BOVIN Amelogenin, X isoform OS=Bos taurus OX=9913 GN=AMELX PE=1 SV=2	1	hf1_10472_ebo_26_1_261219.ScanId;v=1;d1=27202.27202.4	controllerType=0 controllerNumber=1 scan=27202	56.5907
33806:5	1	S.MPLPPHPGHPGYINFS[+79.966]YEVLTPLKWY[+15.995]QSMIRHPYP.S		S[+80], Y[+16]	852.817	5	4260.06	4259.04	1	2.5	17	Non	577.09	577.09	4.09	8.35	1206	>sp|P02817|AMELX_BOVIN Amelogenin, X isoform OS=Bos taurus OX=9913 GN=AMELX PE=1 SV=2	1	hf1_10472_ebo_26_1_261219.ScanId;v=1;d1=25088.25088.5	controllerType=0 controllerNumber=1 scan=25088	52.7945
32727:5	1	S.MPLPPHPGHPGYINFS[+79.966]YEVLTPLKWYQSM[+15.995]IRHPYP.S		M[+16], S[+80]	852.619	5	4259.07	4259.04	0	5.4	17	Non	582.03	582.03	34.66	8.78	1206	>sp|P02817|AMELX_BOVIN Amelogenin, X isoform OS=Bos taurus OX=9913 GN=AMELX PE=1 SV=2	1	hf1_10472_ebo_26_1_261219.ScanId;v=1;d1=24359.24359.5	controllerType=0 controllerNumber=1 scan=24359	51.5038
37618:4	1	S.MPLPPHPGHPGYIN[+0.984]FS[+79.966]YEVLTPLKWYQSMIRHPYP.S		N[+1], S[+80]	1061.77	4	4244.07	4244.03	0	7.9	17	Non	616.19	616.19	40.45	8.97	1206	>sp|P02817|AMELX_BOVIN Amelogenin, X isoform OS=Bos taurus OX=9913 GN=AMELX PE=1 SV=2	1	hf1_10472_ebo_26_1_261219.ScanId;v=1;d1=27639.27639.4	controllerType=0 controllerNumber=1 scan=27639	57.3664
33364:4	1	S.MPLPPHPGHPGYINFS[+79.966]YEVLTPLKWYQSM[+15.995]IRHPYP.S		M[+16], S[+80]	1065.52	4	4259.05	4259.04	0	2.1	17	Non	655.25	655.25	45.43	8.97	1206	>sp|P02817|AMELX_BOVIN Amelogenin, X isoform OS=Bos taurus OX=9913 GN=AMELX PE=1 SV=2	1	hf1_10472_ebo_26_1_261219.ScanId;v=1;d1=24789.24789.4	controllerType=0 controllerNumber=1 scan=24789	52.2626
36600:5	1	S.MPLPPHPGHPGY[+15.995]INFS[+79.966]YEVLTPLKWYQSMIRHPYP.S		S[+80], Y[+16]	852.619	5	4259.07	4259.04	0	5.5	17	Non	687.35	687.35	1.21	10.78	1206	>sp|P02817|AMELX_BOVIN Amelogenin, X isoform OS=Bos taurus OX=9913 GN=AMELX PE=1 SV=2	1	hf1_10472_ebo_26_1_261219.ScanId;v=1;d1=26975.26975.5	controllerType=0 controllerNumber=1 scan=26975	56.1831
46256:5	1	S.MPLPPHPGHPGYINFS[+79.966]YEVLTPLKWY[+15.995]QSMIRHPYP.S		S[+80], Y[+16]	852.622	5	4259.08	4259.04	0	8.5	17	Non	708.37	708.37	19.93	11.51	1206	>sp|P02817|AMELX_BOVIN Amelogenin, X isoform OS=Bos taurus OX=9913 GN=AMELX PE=1 SV=2	1	hf1_10472_ebo_26_1_261219.ScanId;v=1;d1=34397.34397.5	controllerType=0 controllerNumber=1 scan=34397	73.6367
34092:5	1	S.MPLPPHPGHPGYINFS[+79.966]YEVLTPLKWY[+15.995]QSMIRHPYP.S		S[+80], Y[+16]	852.817	5	4260.06	4259.04	1	1.9	17	Non	709.84	709.84	8.07	10.82	1206	>sp|P02817|AMELX_BOVIN Amelogenin, X isoform OS=Bos taurus OX=9913 GN=AMELX PE=1 SV=2	1	hf1_10472_ebo_26_1_261219.ScanId;v=1;d1=25286.25286.5	controllerType=0 controllerNumber=1 scan=25286	53.1513
37238:5	1	S.MP[+15.995]LPPHPGHPGYINFS[+79.966]YEVLTPLKWYQSMIRHPYP.S		P[+16], S[+80]	852.817	5	4260.05	4259.04	1	1.9	17	Non	715.22	715.22	0.16	10.82	1206	>sp|P02817|AMELX_BOVIN Amelogenin, X isoform OS=Bos taurus OX=9913 GN=AMELX PE=1 SV=2	1	hf1_10472_ebo_26_1_261219.ScanId;v=1;d1=27393.27393.5	controllerType=0 controllerNumber=1 scan=27393	56.9288
38530:5	1	S.MPLPPHPGHPGYINFS[+79.966]YEVLTPLKWYQ[+0.984]SMIRHPYP.S		Q[+1], S[+80]	849.619	5	4244.06	4244.03	0	7.2	17	Non	727.94	727.94	31.04	11.82	1206	>sp|P02817|AMELX_BOVIN Amelogenin, X isoform OS=Bos taurus OX=9913 GN=AMELX PE=1 SV=2	1	hf1_10472_ebo_26_1_261219.ScanId;v=1;d1=28236.28236.5	controllerType=0 controllerNumber=1 scan=28236	58.4389
37903:4	1	S.MPLPPHPGHPGYIN[+0.984]FS[+79.966]YEVLTPLKWYQSMIRHPYP.S		N[+1], S[+80]	1061.77	4	4244.07	4244.03	0	7.9	17	Non	736.08	736.08	15.76	10.97	1206	>sp|P02817|AMELX_BOVIN Amelogenin, X isoform OS=Bos taurus OX=9913 GN=AMELX PE=1 SV=2	1	hf1_10472_ebo_26_1_261219.ScanId;v=1;d1=27831.27831.4	controllerType=0 controllerNumber=1 scan=27831	57.714
33020:5	1	S.MPLPPHPGHPGYINFS[+79.966]YEVLTPLKWYQSM[+15.995]IRHPYP.S		M[+16], S[+80]	852.619	5	4259.07	4259.04	0	5.5	17	Non	754.64	754.64	29.82	12.78	1206	>sp|P02817|AMELX_BOVIN Amelogenin, X isoform OS=Bos taurus OX=9913 GN=AMELX PE=1 SV=2	1	hf1_10472_ebo_26_1_261219.ScanId;v=1;d1=24560.24560.5	controllerType=0 controllerNumber=1 scan=24560	51.8592
36642:4	1	S.MPLPPHPGHP[+15.995]GYINFS[+79.966]YEVLTPLKWYQSMIRHPYP.S		P[+16], S[+80]	1065.52	4	4259.07	4259.04	0	5.1	17	Non	768.37	768.37	4.17	11.93	1206	>sp|P02817|AMELX_BOVIN Amelogenin, X isoform OS=Bos taurus OX=9913 GN=AMELX PE=1 SV=2	1	hf1_10472_ebo_26_1_261219.ScanId;v=1;d1=27004.27004.4	controllerType=0 controllerNumber=1 scan=27004	56.2327
36296:5	1	S.MP[+15.995]LPPHPGHPGYINFS[+79.966]YEVLTPLKWYQSMIRHPYP.S		P[+16], S[+80]	852.62	5	4259.07	4259.04	0	6.1	17	Non	793.99	793.99	6.53	12.78	1206	>sp|P02817|AMELX_BOVIN Amelogenin, X isoform OS=Bos taurus OX=9913 GN=AMELX PE=1 SV=2	1	hf1_10472_ebo_26_1_261219.ScanId;v=1;d1=26777.26777.5	controllerType=0 controllerNumber=1 scan=26777	55.8302
36028:4	1	S.M[+15.995]PLPPHPGHPGYINFS[+79.966]YEVLTPLKWYQSMIRHPYP.S		M[+16], S[+80]	1065.52	4	4259.07	4259.04	0	6.3	17	Non	821.53	821.53	23.66	12.97	1206	>sp|P02817|AMELX_BOVIN Amelogenin, X isoform OS=Bos taurus OX=9913 GN=AMELX PE=1 SV=2	1	hf1_10472_ebo_26_1_261219.ScanId;v=1;d1=26600.26600.4	controllerType=0 controllerNumber=1 scan=26600	55.5149
37251:4	1	S.M[+15.995]PLPPHPGHPGYINFS[+79.966]YEVLTPLKWYQSMIRHPYP.S		M[+16], S[+80]	1065.77	4	4260.06	4259.04	1	3.2	17	Non	946.32	946.32	7.66	14.5	1206	>sp|P02817|AMELX_BOVIN Amelogenin, X isoform OS=Bos taurus OX=9913 GN=AMELX PE=1 SV=2	1	hf1_10472_ebo_26_1_261219.ScanId;v=1;d1=27401.27401.4	controllerType=0 controllerNumber=1 scan=27401	56.9438
33947:4	1	S.MPLPPHPGHPGYINFS[+79.966]YEVLTPLKWYQSM[+15.995]IRHPYP.S		M[+16], S[+80]	1065.77	4	4260.06	4259.04	1	3.6	17	Non	956.13	956.13	22.04	15.5	1206	>sp|P02817|AMELX_BOVIN Amelogenin, X isoform OS=Bos taurus OX=9913 GN=AMELX PE=1 SV=2	1	hf1_10472_ebo_26_1_261219.ScanId;v=1;d1=25187.25187.4	controllerType=0 controllerNumber=1 scan=25187	52.9725
32760:4	1	S.MPLPPHPGHPGYINFS[+79.966]YEVLTPLKWYQSM[+15.995]IRHPYP.S		M[+16], S[+80]	1065.52	4	4259.07	4259.04	0	6	17	Non	1009.91	1009.91	27.38	16.93	1206	>sp|P02817|AMELX_BOVIN Amelogenin, X isoform OS=Bos taurus OX=9913 GN=AMELX PE=1 SV=2	1	hf1_10472_ebo_26_1_261219.ScanId;v=1;d1=24382.24382.4	controllerType=0 controllerNumber=1 scan=24382	51.544
38498:4	1	S.MPLPPHPGHPGYINFS[+79.966]YEVLTPLKWYQ[+0.984]SMIRHPYP.S		Q[+1], S[+80]	1061.77	4	4244.06	4244.03	0	7	17	Non	1021.01	1021.01	92.78	16.97	1206	>sp|P02817|AMELX_BOVIN Amelogenin, X isoform OS=Bos taurus OX=9913 GN=AMELX PE=1 SV=2	1	hf1_10472_ebo_26_1_261219.ScanId;v=1;d1=28216.28216.4	controllerType=0 controllerNumber=1 scan=28216	58.4028
33052:4	1	S.MPLPPHPGHPGYINFS[+79.966]YEVLTPLKWYQSM[+15.995]IRHPYP.S		M[+16], S[+80]	1065.52	4	4259.07	4259.04	0	5.3	17	Non	1141.05	1141.05	67.36	18.93	1206	>sp|P02817|AMELX_BOVIN Amelogenin, X isoform OS=Bos taurus OX=9913 GN=AMELX PE=1 SV=2	1	hf1_10472_ebo_26_1_261219.ScanId;v=1;d1=24583.24583.4	controllerType=0 controllerNumber=1 scan=24583	51.8986
36329:4	1	S.M[+15.995]PLPPHPGHPGYINFS[+79.966]YEVLTPLKWYQSMIRHPYP.S		M[+16], S[+80]	1065.52	4	4259.07	4259.04	0	6.6	17	Non	1198.68	1198.68	28.55	19.97	1206	>sp|P02817|AMELX_BOVIN Amelogenin, X isoform OS=Bos taurus OX=9913 GN=AMELX PE=1 SV=2	1	hf1_10472_ebo_26_1_261219.ScanId;v=1;d1=26799.26799.4	controllerType=0 controllerNumber=1 scan=26799	55.8691
46262:6	1	S.MPLP[+31.990]P[+31.990]HP[+15.995]GHPGYINFSYEVLTPLKWYQSMIRHPYP.S		P[+16][+32]*2	708.186	6	4244.08	4243.06	1	4.1	17	Non	88.55	88.55	2.24	2.47	1206	>sp|P02817|AMELX_BOVIN Amelogenin, X isoform OS=Bos taurus OX=9913 GN=AMELX PE=1 SV=2	1	hf1_10472_ebo_26_1_261219.ScanId;v=1;d1=34403.34403.6	controllerType=0 controllerNumber=1 scan=34403	73.6494
28663:5	1	S.MPLPPHPGHPGYINFS[+79.966]YEVLTPLK[+15.995]WYQSM[+15.995]IRHPYP.S		K[+16], M[+16], S[+80]	855.62	5	4274.07	4275.04	-1	8.1	17	Non	92.18	92.18	10.74	2.31	1206	>sp|P02817|AMELX_BOVIN Amelogenin, X isoform OS=Bos taurus OX=9913 GN=AMELX PE=1 SV=2	1	hf1_10472_ebo_26_1_261219.ScanId;v=1;d1=21637.21637.3	controllerType=0 controllerNumber=1 scan=21637	46.7285
37951:6	1	S.MPLPPHPGHP[+15.995]GY[+31.990]INF[+31.990]SYEVLTPLKWYQSMIRHPYP.S		F[+32], P[+16], Y[+32]	708.182	6	4244.06	4243.06	1	-0.9	17	Non	94.37	94.37	0	2.29	1206	>sp|P02817|AMELX_BOVIN Amelogenin, X isoform OS=Bos taurus OX=9913 GN=AMELX PE=1 SV=2	1	hf1_10472_ebo_26_1_261219.ScanId;v=1;d1=27860.27860.6	controllerType=0 controllerNumber=1 scan=27860	57.7637
29155:5	1	S.MP[+15.995]LPPHPGHPGYINFS[+79.966]YEVLTPLKWYQSM[+31.990]IRHPYP.S		M[+32], P[+16], S[+80]	859.016	5	4291.05	4291.03	0	4.2	17	Non	96.87	96.87	5.8	2.44	1206	>sp|P02817|AMELX_BOVIN Amelogenin, X isoform OS=Bos taurus OX=9913 GN=AMELX PE=1 SV=2	1	hf1_10472_ebo_26_1_261219.ScanId;v=1;d1=21979.21979.5	controllerType=0 controllerNumber=1 scan=21979	47.3225
29250:5	1	S.MPLPPHPGHPGYINFS[+79.966]YEVLTPLKW[+15.995]YQSM[+15.995]IRHPYP.S		M[+16], S[+80], W[+16]	855.819	5	4275.06	4275.04	0	6.1	17	Non	128.8	128.8	14.17	2.62	1206	>sp|P02817|AMELX_BOVIN Amelogenin, X isoform OS=Bos taurus OX=9913 GN=AMELX PE=1 SV=2	1	hf1_10472_ebo_26_1_261219.ScanId;v=1;d1=22041.22041.3	controllerType=0 controllerNumber=1 scan=22041	47.4318
33377:6	1	S.MP[+15.995]LPPHPGHPGYINFS[+79.966]YEVLTPLKWY[+15.995]QSMIRHPYP.S		P[+16], S[+80], Y[+16]	713.347	6	4275.04	4275.04	0	1.2	17	Non	130.58	130.58	0	2.35	1206	>sp|P02817|AMELX_BOVIN Amelogenin, X isoform OS=Bos taurus OX=9913 GN=AMELX PE=1 SV=2	1	hf1_10472_ebo_26_1_261219.ScanId;v=1;d1=24799.24799.6	controllerType=0 controllerNumber=1 scan=24799	52.2805
30509:4	1	S.MP[+15.995]LPPHPGHPGYINFS[+79.966]YEVLTPLKW[+15.995]YQSMIRHPYP.S		P[+16], S[+80], W[+16]	1069.77	4	4276.07	4275.04	1	5.9	17	Non	134.87	134.87	5.8	2.24	1206	>sp|P02817|AMELX_BOVIN Amelogenin, X isoform OS=Bos taurus OX=9913 GN=AMELX PE=1 SV=2	1	hf1_10472_ebo_26_1_261219.ScanId;v=1;d1=22912.22912.4	controllerType=0 controllerNumber=1 scan=22912	48.9541
30121:5	1	S.MPLP[+15.995]PHPGHPGYINFS[+79.966]YEVLTPLKW[+15.995]YQSMIRHPYP.S		P[+16], S[+80], W[+16]	856.019	5	4276.06	4275.04	1	5.4	17	Non	155.97	155.97	0.39	2.62	1206	>sp|P02817|AMELX_BOVIN Amelogenin, X isoform OS=Bos taurus OX=9913 GN=AMELX PE=1 SV=2	1	hf1_10472_ebo_26_1_261219.ScanId;v=1;d1=22644.22644.5	controllerType=0 controllerNumber=1 scan=22644	48.4877
38286:4	1	S.MPLPPHP[+15.995]GHPGY[+31.990]INFSY[+15.995]EVLTPLKWYQSMIRHPYP.S		P[+16], Y[+16][+32]	1057.52	4	4227.04	4227.06	0	-4.9	17	Non	160.29	160.29	3.44	0.87	1206	>sp|P02817|AMELX_BOVIN Amelogenin, X isoform OS=Bos taurus OX=9913 GN=AMELX PE=1 SV=2	1	hf1_10472_ebo_26_1_261219.ScanId;v=1;d1=28077.28077.4	controllerType=0 controllerNumber=1 scan=28077	58.1525
34061:4	1	S.MPLPPHP[+15.995]GHPGYINFS[+79.966]YEVLTPLKWYQSM[+15.995]IRHPYP.S		M[+16], P[+16], S[+80]	1069.77	4	4276.07	4275.04	1	7.8	17	Non	161.06	161.06	14.81	2.67	1206	>sp|P02817|AMELX_BOVIN Amelogenin, X isoform OS=Bos taurus OX=9913 GN=AMELX PE=1 SV=2	1	hf1_10472_ebo_26_1_261219.ScanId;v=1;d1=25263.25263.4	controllerType=0 controllerNumber=1 scan=25263	53.1084
31649:4	1	S.M[+15.995]PLPPHPGHPGYINFS[+79.966]YEVLTPLKWY[+31.990]QSMIRHPYP.S		M[+16], S[+80], Y[+32]	1073.52	4	4291.06	4291.03	0	5.7	17	Non	167.6	167.6	0	2.64	1206	>sp|P02817|AMELX_BOVIN Amelogenin, X isoform OS=Bos taurus OX=9913 GN=AMELX PE=1 SV=2	1	hf1_10472_ebo_26_1_261219.ScanId;v=1;d1=23660.23660.4	controllerType=0 controllerNumber=1 scan=23660	50.2714
33907:5	1	S.MP[+15.995]LPPHPGHPGYINFS[+79.966]YEVLTPLKW[+31.990]YQSMIRHPYP.S		P[+16], S[+80], W[+32]	859.017	5	4291.06	4291.03	0	5.7	17	Non	177.23	177.23	0	3.36	1206	>sp|P02817|AMELX_BOVIN Amelogenin, X isoform OS=Bos taurus OX=9913 GN=AMELX PE=1 SV=2	1	hf1_10472_ebo_26_1_261219.ScanId;v=1;d1=25160.25160.4	controllerType=0 controllerNumber=1 scan=25160	52.9234
35464:5	1	S.MPLPPHPGHPGYINF[+31.990]SY[+31.990]EVLTPLKWYQSM[+15.995]IRHPYP.S		F[+32], M[+16], Y[+32]	849.214	5	4242.04	4243.06	-1	-3	17	Non	189.34	189.34	16.68	2.44	1206	>sp|P02817|AMELX_BOVIN Amelogenin, X isoform OS=Bos taurus OX=9913 GN=AMELX PE=1 SV=2	1	hf1_10472_ebo_26_1_261219.ScanId;v=1;d1=26225.26225.5	controllerType=0 controllerNumber=1 scan=26225	54.8412
35840:4	1	S.MP[+15.995]LPPHPGHPGYINF[+15.995]S[+79.966]YEVLTPLKWYQSMIRHPYP.S		F[+16], P[+16], S[+80]	1069.77	4	4276.07	4275.04	1	7.4	17	Non	191.65	191.65	5.8	3.03	1206	>sp|P02817|AMELX_BOVIN Amelogenin, X isoform OS=Bos taurus OX=9913 GN=AMELX PE=1 SV=2	1	hf1_10472_ebo_26_1_261219.ScanId;v=1;d1=26473.26473.3	controllerType=0 controllerNumber=1 scan=26473	55.2845
37887:4	1	S.MPLPPHPGHPGYINFS[+79.966]YEVLTP[+15.995]LKWYQSMIR[+0.984]HPYP.S		P[+16], R[+1], S[+80]	1065.77	4	4260.04	4260.03	0	3.5	17	Non	194.83	194.83	0	2.39	1206	>sp|P02817|AMELX_BOVIN Amelogenin, X isoform OS=Bos taurus OX=9913 GN=AMELX PE=1 SV=2	1	hf1_10472_ebo_26_1_261219.ScanId;v=1;d1=27818.27818.5	controllerType=0 controllerNumber=1 scan=27818	57.6886
29746:5	1	S.MPLPPHPGHPGYINFS[+79.966]YEVLTP[+31.990]LKWYQSM[+15.995]IRHPYP.S		M[+16], P[+32], S[+80]	858.818	5	4290.06	4291.03	-1	7.7	17	Non	196.73	196.73	0	3.79	1206	>sp|P02817|AMELX_BOVIN Amelogenin, X isoform OS=Bos taurus OX=9913 GN=AMELX PE=1 SV=2	1	hf1_10472_ebo_26_1_261219.ScanId;v=1;d1=22377.22377.5	controllerType=0 controllerNumber=1 scan=22377	48.0188
27789:5	1	S.MP[+15.995]LPPHPGHPGYINFS[+79.966]YEVLTPLKWYQSM[+31.990]IRHPYP.S		M[+32], P[+16], S[+80]	859.018	5	4291.06	4291.03	0	6.2	17	Non	205.7	205.7	0	4.11	1206	>sp|P02817|AMELX_BOVIN Amelogenin, X isoform OS=Bos taurus OX=9913 GN=AMELX PE=1 SV=2	1	hf1_10472_ebo_26_1_261219.ScanId;v=1;d1=21043.21043.5	controllerType=0 controllerNumber=1 scan=21043	45.6918
33816:4	1	S.MPLPPHP[+15.995]GHPGYINFS[+79.966]YEVLTPLKWYQSM[+15.995]IRHPYP.S		M[+16], P[+16], S[+80]	1069.52	4	4275.07	4275.04	0	6.6	17	Non	209.55	209.55	0	2.89	1206	>sp|P02817|AMELX_BOVIN Amelogenin, X isoform OS=Bos taurus OX=9913 GN=AMELX PE=1 SV=2	1	hf1_10472_ebo_26_1_261219.ScanId;v=1;d1=25094.25094.5	controllerType=0 controllerNumber=1 scan=25094	52.8064
46268:6	1	S.MP[+15.995]LPPHPGHPGYINFS[+79.966]YEVLTPLKWY[+15.995]QSMIRHPYP.S		P[+16], S[+80], Y[+16]	713.519	6	4276.08	4275.04	1	8.7	17	Non	212.58	212.58	3.31	3.84	1206	>sp|P02817|AMELX_BOVIN Amelogenin, X isoform OS=Bos taurus OX=9913 GN=AMELX PE=1 SV=2	1	hf1_10472_ebo_26_1_261219.ScanId;v=1;d1=34407.34407.6	controllerType=0 controllerNumber=1 scan=34407	73.6555
32915:6	1	S.MP[+15.995]LPPHPGHPGYINFS[+79.966]YEVLTPLKW[+15.995]YQSMIRHPYP.S		P[+16], S[+80], W[+16]	713.347	6	4275.05	4275.04	0	1.6	17	Non	234.07	234.07	0	3.18	1206	>sp|P02817|AMELX_BOVIN Amelogenin, X isoform OS=Bos taurus OX=9913 GN=AMELX PE=1 SV=2	1	hf1_10472_ebo_26_1_261219.ScanId;v=1;d1=24487.24487.6	controllerType=0 controllerNumber=1 scan=24487	51.7278
32506:6	1	S.MP[+15.995]LPPHPGHPGYINFS[+79.966]YEVLTPLKWYQSM[+15.995]IRHPYP.S		M[+16], P[+16], S[+80]	713.351	6	4275.07	4275.04	0	7.4	17	Non	239.37	239.37	0.6	4.34	1206	>sp|P02817|AMELX_BOVIN Amelogenin, X isoform OS=Bos taurus OX=9913 GN=AMELX PE=1 SV=2	1	hf1_10472_ebo_26_1_261219.ScanId;v=1;d1=24216.24216.6	controllerType=0 controllerNumber=1 scan=24216	51.2493
29836:5	1	S.MPLPPHP[+15.995]GHPGYINFS[+79.966]YEVLTPLKWYQSM[+15.995]IRHPYP.S		M[+16], P[+16], S[+80]	856.016	5	4276.05	4275.04	1	2.3	17	Non	239.88	239.88	1.86	3.65	1206	>sp|P02817|AMELX_BOVIN Amelogenin, X isoform OS=Bos taurus OX=9913 GN=AMELX PE=1 SV=2	1	hf1_10472_ebo_26_1_261219.ScanId;v=1;d1=22439.22439.5	controllerType=0 controllerNumber=1 scan=22439	48.127
28096:5	1	S.MP[+15.995]LPPHPGHPGYINFS[+79.966]YEVLTPLKWYQSM[+31.990]IRHPYP.S		M[+32], P[+16], S[+80]	859.017	5	4291.06	4291.03	0	5.6	17	Non	241.33	241.33	0	5.3	1206	>sp|P02817|AMELX_BOVIN Amelogenin, X isoform OS=Bos taurus OX=9913 GN=AMELX PE=1 SV=2	1	hf1_10472_ebo_26_1_261219.ScanId;v=1;d1=21253.21253.5	controllerType=0 controllerNumber=1 scan=21253	46.0567
33109:6	1	S.MP[+15.995]LPPHPGHPGYINFS[+79.966]YEVLTPLK[+15.995]WYQSMIRHPYP.S		K[+16], P[+16], S[+80]	713.514	6	4276.05	4275.04	1	1.1	17	Non	245.94	245.94	0	4.38	1206	>sp|P02817|AMELX_BOVIN Amelogenin, X isoform OS=Bos taurus OX=9913 GN=AMELX PE=1 SV=2	1	hf1_10472_ebo_26_1_261219.ScanId;v=1;d1=24620.24620.5	controllerType=0 controllerNumber=1 scan=24620	51.9644
31006:4	1	S.MPLPPHPGHPGYINFS[+79.966]YEVLTP[+31.990]LKWYQSM[+15.995]IRHPYP.S		M[+16], P[+32], S[+80]	1073.27	4	4290.06	4291.03	-1	7.3	17	Non	246	246	1.8	4.45	1206	>sp|P02817|AMELX_BOVIN Amelogenin, X isoform OS=Bos taurus OX=9913 GN=AMELX PE=1 SV=2	1	hf1_10472_ebo_26_1_261219.ScanId;v=1;d1=23242.23242.4	controllerType=0 controllerNumber=1 scan=23242	49.5386
33959:4	1	S.M[+15.995]PLPPHPGHPGYINFS[+79.966]YEVLTPLKWYQSM[+31.990]IRHPYP.S		M[+16][+32], S[+80]	1073.52	4	4291.06	4291.03	0	7.1	17	Non	247.07	247.07	8.64	4.29	1206	>sp|P02817|AMELX_BOVIN Amelogenin, X isoform OS=Bos taurus OX=9913 GN=AMELX PE=1 SV=2	1	hf1_10472_ebo_26_1_261219.ScanId;v=1;d1=25195.25195.4	controllerType=0 controllerNumber=1 scan=25195	52.9871
31699:5	1	S.MPLPPHPGHP[+31.990]GYINFS[+79.966]YEVLTPLKWYQSM[+15.995]IRHPYP.S		M[+16], P[+32], S[+80]	858.817	5	4290.05	4291.03	-1	5.7	17	Non	254.41	254.41	1.55	5.06	1206	>sp|P02817|AMELX_BOVIN Amelogenin, X isoform OS=Bos taurus OX=9913 GN=AMELX PE=1 SV=2	1	hf1_10472_ebo_26_1_261219.ScanId;v=1;d1=23695.23695.5	controllerType=0 controllerNumber=1 scan=23695	50.3376
32776:5	1	S.MP[+15.995]LPPHPGHPGYINFS[+79.966]YEVLTPLKW[+31.990]YQSMIRHPYP.S		P[+16], S[+80], W[+32]	859.215	5	4292.05	4291.03	1	2.5	17	Non	261.86	261.86	5.8	4.87	1206	>sp|P02817|AMELX_BOVIN Amelogenin, X isoform OS=Bos taurus OX=9913 GN=AMELX PE=1 SV=2	1	hf1_10472_ebo_26_1_261219.ScanId;v=1;d1=24392.24392.3	controllerType=0 controllerNumber=1 scan=24392	51.5615
34248:5	1	S.MP[+15.995]LPPHPGHPGYINFS[+79.966]YEVLTPLKW[+15.995]YQSMIRHPYP.S		P[+16], S[+80], W[+16]	855.615	5	4274.05	4275.04	-1	2.8	17	Non	284.12	284.12	0	5.14	1206	>sp|P02817|AMELX_BOVIN Amelogenin, X isoform OS=Bos taurus OX=9913 GN=AMELX PE=1 SV=2	1	hf1_10472_ebo_26_1_261219.ScanId;v=1;d1=25393.25393.5	controllerType=0 controllerNumber=1 scan=25393	53.3433
29257:5	1	S.MPLPPHPGHPGYINFS[+79.966]YEVLTPLKWY[+15.995]QSM[+15.995]IRHPYP.S		M[+16], S[+80], Y[+16]	855.819	5	4275.06	4275.04	0	6.1	17	Non	289.14	289.14	13.78	5.61	1206	>sp|P02817|AMELX_BOVIN Amelogenin, X isoform OS=Bos taurus OX=9913 GN=AMELX PE=1 SV=2	1	hf1_10472_ebo_26_1_261219.ScanId;v=1;d1=22045.22045.5	controllerType=0 controllerNumber=1 scan=22045	47.4379
46269:5	1	S.M[+15.995]PLPPHPGHPGYINFS[+79.966]YEVLTPLKW[+31.990]YQSMIRHPYP.S		M[+16], S[+80], W[+32]	859.02	5	4291.07	4291.03	0	8.4	17	Non	289.68	289.68	0	5.14	1206	>sp|P02817|AMELX_BOVIN Amelogenin, X isoform OS=Bos taurus OX=9913 GN=AMELX PE=1 SV=2	1	hf1_10472_ebo_26_1_261219.ScanId;v=1;d1=34408.34408.5	controllerType=0 controllerNumber=1 scan=34408	73.657
29449:5	1	S.MP[+15.995]LPPHPGHPGYINFS[+79.966]YEVLTPLKWY[+31.990]QSMIRHPYP.S		P[+16], S[+80], Y[+32]	859.018	5	4291.06	4291.03	0	6.7	17	Non	293.22	293.22	0	5.65	1206	>sp|P02817|AMELX_BOVIN Amelogenin, X isoform OS=Bos taurus OX=9913 GN=AMELX PE=1 SV=2	1	hf1_10472_ebo_26_1_261219.ScanId;v=1;d1=22174.22174.5	controllerType=0 controllerNumber=1 scan=22174	47.6646
34343:4	1	S.MP[+15.995]LPPHPGHPGYINFS[+79.966]YEVLTPLKW[+15.995]YQSMIRHPYP.S		P[+16], S[+80], W[+16]	1069.77	4	4276.06	4275.04	1	4.1	17	Non	295.58	295.58	0	4.33	1206	>sp|P02817|AMELX_BOVIN Amelogenin, X isoform OS=Bos taurus OX=9913 GN=AMELX PE=1 SV=2	1	hf1_10472_ebo_26_1_261219.ScanId;v=1;d1=25457.25457.4	controllerType=0 controllerNumber=1 scan=25457	53.4582
33107:5	1	S.MP[+15.995]LPPHPGHPGYINFS[+79.966]YEVLTPLKWYQSM[+31.990]IRHPYP.S		M[+32], P[+16], S[+80]	859.012	5	4291.03	4291.03	0	-0.8	17	Non	295.77	295.77	17.58	4.78	1206	>sp|P02817|AMELX_BOVIN Amelogenin, X isoform OS=Bos taurus OX=9913 GN=AMELX PE=1 SV=2	1	hf1_10472_ebo_26_1_261219.ScanId;v=1;d1=24619.24619.5	controllerType=0 controllerNumber=1 scan=24619	51.9629
30317:5	1	S.MPLPPHP[+15.995]GHPGYINFS[+79.966]YEVLTPLKW[+31.990]YQSMIRHPYP.S		P[+16], S[+80], W[+32]	859.018	5	4291.06	4291.03	0	6.5	17	Non	299.37	299.37	0	5.45	1206	>sp|P02817|AMELX_BOVIN Amelogenin, X isoform OS=Bos taurus OX=9913 GN=AMELX PE=1 SV=2	1	hf1_10472_ebo_26_1_261219.ScanId;v=1;d1=22782.22782.5	controllerType=0 controllerNumber=1 scan=22782	48.7281
34215:5	1	S.MPLPPHPGHPGYINF[+31.990]SY[+31.990]EVLTPLK[+15.995]WYQSMIRHPYP.S		F[+32], K[+16], Y[+32]	849.216	5	4242.05	4243.06	-1	-0.5	17	Non	304.64	304.64	2.82	4.73	1206	>sp|P02817|AMELX_BOVIN Amelogenin, X isoform OS=Bos taurus OX=9913 GN=AMELX PE=1 SV=2	1	hf1_10472_ebo_26_1_261219.ScanId;v=1;d1=25371.25371.5	controllerType=0 controllerNumber=1 scan=25371	53.3018
34623:4	1	S.MPLPPHPGHPGYINFS[+79.966]YEVLTP[+15.995]LKWY[+15.995]QSMIRHPYP.S		P[+16], S[+80], Y[+16]	1069.77	4	4276.07	4275.04	1	7.5	17	Non	310.42	310.42	3.62	4.8	1206	>sp|P02817|AMELX_BOVIN Amelogenin, X isoform OS=Bos taurus OX=9913 GN=AMELX PE=1 SV=2	1	hf1_10472_ebo_26_1_261219.ScanId;v=1;d1=25658.25658.4	controllerType=0 controllerNumber=1 scan=25658	53.8179
36167:5	1	S.MP[+15.995]LPPHPGHPGYINFS[+79.966]Y[+15.995]EVLTPLKWYQSMIRHPYP.S		P[+16], S[+80], Y[+16]	855.817	5	4275.06	4275.04	0	4.4	17	Non	317.98	317.98	3.8	5.61	1206	>sp|P02817|AMELX_BOVIN Amelogenin, X isoform OS=Bos taurus OX=9913 GN=AMELX PE=1 SV=2	1	hf1_10472_ebo_26_1_261219.ScanId;v=1;d1=26690.26690.5	controllerType=0 controllerNumber=1 scan=26690	55.6764
28379:5	1	S.MP[+15.995]LPPHPGHPGYINFS[+79.966]YEVLTPLKWY[+31.990]QSMIRHPYP.S		P[+16], S[+80], Y[+32]	859.017	5	4291.05	4291.03	0	4.9	17	Non	324.78	324.78	4	5.7	1206	>sp|P02817|AMELX_BOVIN Amelogenin, X isoform OS=Bos taurus OX=9913 GN=AMELX PE=1 SV=2	1	hf1_10472_ebo_26_1_261219.ScanId;v=1;d1=21446.21446.5	controllerType=0 controllerNumber=1 scan=21446	46.3961
34230:6	1	S.MPLPPHPGHPGYINFS[+79.966]YEVLTPLKWYQ[+0.984]SM[+15.995]IRHPYP.S		M[+16], Q[+1], S[+80]	710.848	6	4260.05	4260.03	0	5.5	17	Non	325.51	325.51	12.01	5.83	1206	>sp|P02817|AMELX_BOVIN Amelogenin, X isoform OS=Bos taurus OX=9913 GN=AMELX PE=1 SV=2	1	hf1_10472_ebo_26_1_261219.ScanId;v=1;d1=25381.25381.6	controllerType=0 controllerNumber=1 scan=25381	53.3197
30094:4	1	S.MPLPPHPGHPGYINFS[+79.966]YEVLTP[+31.990]LKWYQSM[+15.995]IRHPYP.S		M[+16], P[+32], S[+80]	1073.52	4	4291.07	4291.03	0	8.8	17	Non	342.94	342.94	3.71	4.58	1206	>sp|P02817|AMELX_BOVIN Amelogenin, X isoform OS=Bos taurus OX=9913 GN=AMELX PE=1 SV=2	1	hf1_10472_ebo_26_1_261219.ScanId;v=1;d1=22623.22623.4	controllerType=0 controllerNumber=1 scan=22623	48.4489
30708:5	1	S.M[+15.995]PLPPHPGHPGYINFS[+79.966]YEVLTPLKW[+15.995]YQSMIRHPYP.S		M[+16], S[+80], W[+16]	855.818	5	4275.06	4275.04	0	5.4	17	Non	354.36	354.36	1.8	5.8	1206	>sp|P02817|AMELX_BOVIN Amelogenin, X isoform OS=Bos taurus OX=9913 GN=AMELX PE=1 SV=2	1	hf1_10472_ebo_26_1_261219.ScanId;v=1;d1=23045.23045.5	controllerType=0 controllerNumber=1 scan=23045	49.1921
34878:5	1	S.MPLPPHPGHPGYINFS[+79.966]YEVLTPLK[+15.995]WYQSM[+15.995]IRHPYP.S		K[+16], M[+16], S[+80]	855.819	5	4275.07	4275.04	0	6.3	17	Non	357.09	357.09	8.9	5.84	1206	>sp|P02817|AMELX_BOVIN Amelogenin, X isoform OS=Bos taurus OX=9913 GN=AMELX PE=1 SV=2	1	hf1_10472_ebo_26_1_261219.ScanId;v=1;d1=25828.25828.5	controllerType=0 controllerNumber=1 scan=25828	54.1275
31321:4	1	S.MPLPPHPGHPGYINFS[+79.966]YEVLTPLKW[+31.990]YQSM[+15.995]IRHPYP.S		M[+16], S[+80], W[+32]	1073.52	4	4291.06	4291.03	0	6.8	17	Non	407.24	407.24	0	6.14	1206	>sp|P02817|AMELX_BOVIN Amelogenin, X isoform OS=Bos taurus OX=9913 GN=AMELX PE=1 SV=2	1	hf1_10472_ebo_26_1_261219.ScanId;v=1;d1=23450.23450.4	controllerType=0 controllerNumber=1 scan=23450	49.9039
31748:4	1	S.MPLPPHPGHP[+31.990]GYINFS[+79.966]YEVLTPLKWYQSM[+15.995]IRHPYP.S		M[+16], P[+32], S[+80]	1073.52	4	4291.07	4291.03	0	8.1	17	Non	431.8	431.8	0	5.52	1206	>sp|P02817|AMELX_BOVIN Amelogenin, X isoform OS=Bos taurus OX=9913 GN=AMELX PE=1 SV=2	1	hf1_10472_ebo_26_1_261219.ScanId;v=1;d1=23726.23726.4	controllerType=0 controllerNumber=1 scan=23726	50.3929
30034:5	1	S.MPLPPHPGHPGYINFS[+79.966]YEVLTPLKW[+31.990]YQSM[+15.995]IRHPYP.S		M[+16], S[+80], W[+32]	859.017	5	4291.06	4291.03	0	5.5	17	Non	532.77	532.77	0.72	7.15	1206	>sp|P02817|AMELX_BOVIN Amelogenin, X isoform OS=Bos taurus OX=9913 GN=AMELX PE=1 SV=2	1	hf1_10472_ebo_26_1_261219.ScanId;v=1;d1=22581.22581.5	controllerType=0 controllerNumber=1 scan=22581	48.3737
32186:6	1	S.MP[+15.995]LPPHPGHPGYINFS[+79.966]YEVLTPLKWYQSM[+15.995]IRHPYP.S		M[+16], P[+16], S[+80]	713.35	6	4275.06	4275.04	0	5.6	17	Non	545.5	545.5	1.8	8.01	1206	>sp|P02817|AMELX_BOVIN Amelogenin, X isoform OS=Bos taurus OX=9913 GN=AMELX PE=1 SV=2	1	hf1_10472_ebo_26_1_261219.ScanId;v=1;d1=24017.24017.6	controllerType=0 controllerNumber=1 scan=24017	50.9001
29812:4	1	S.MPLPPHPGHPGYINFS[+79.966]YEVLTP[+31.990]LKWYQSM[+15.995]IRHPYP.S		M[+16], P[+32], S[+80]	1073.52	4	4291.07	4291.03	0	9.6	17	Non	562.17	562.17	2.8	6.95	1206	>sp|P02817|AMELX_BOVIN Amelogenin, X isoform OS=Bos taurus OX=9913 GN=AMELX PE=1 SV=2	1	hf1_10472_ebo_26_1_261219.ScanId;v=1;d1=22423.22423.4	controllerType=0 controllerNumber=1 scan=22423	48.0975
31886:6	1	S.MP[+15.995]LPPHPGHPGYINFS[+79.966]YEVLTPLKWY[+15.995]QSMIRHPYP.S		P[+16], S[+80], Y[+16]	713.349	6	4275.06	4275.04	0	4.4	17	Non	579.88	579.88	5.8	8.81	1206	>sp|P02817|AMELX_BOVIN Amelogenin, X isoform OS=Bos taurus OX=9913 GN=AMELX PE=1 SV=2	1	hf1_10472_ebo_26_1_261219.ScanId;v=1;d1=23821.23821.6	controllerType=0 controllerNumber=1 scan=23821	50.5559
32710:5	1	S.MPLPPHPGHPGY[+15.995]INFS[+79.966]YEVLTPLKWYQSM[+15.995]IRHPYP.S		M[+16], S[+80], Y[+16]	855.818	5	4275.06	4275.04	0	5.1	17	Non	596.48	596.48	7.85	8.78	1206	>sp|P02817|AMELX_BOVIN Amelogenin, X isoform OS=Bos taurus OX=9913 GN=AMELX PE=1 SV=2	1	hf1_10472_ebo_26_1_261219.ScanId;v=1;d1=24348.24348.5	controllerType=0 controllerNumber=1 scan=24348	51.4845
31244:5	1	S.MPLPPHPGHPGYINFS[+79.966]YEVLTP[+31.990]LKWYQSM[+15.995]IRHPYP.S		M[+16], P[+32], S[+80]	859.017	5	4291.06	4291.03	0	5.6	17	Non	610.89	610.89	2.56	9.07	1206	>sp|P02817|AMELX_BOVIN Amelogenin, X isoform OS=Bos taurus OX=9913 GN=AMELX PE=1 SV=2	1	hf1_10472_ebo_26_1_261219.ScanId;v=1;d1=23400.23400.5	controllerType=0 controllerNumber=1 scan=23400	49.8171
34375:5	1	S.MPLPPHPGHPGYINFS[+79.966]YEVLTPLKWYQ[+0.984]SM[+15.995]IRHPYP.S		M[+16], Q[+1], S[+80]	852.817	5	4260.05	4260.03	0	6.3	17	Non	622.7	622.7	4.89	9.12	1206	>sp|P02817|AMELX_BOVIN Amelogenin, X isoform OS=Bos taurus OX=9913 GN=AMELX PE=1 SV=2	1	hf1_10472_ebo_26_1_261219.ScanId;v=1;d1=25481.25481.5	controllerType=0 controllerNumber=1 scan=25481	53.5029
33008:5	1	S.MP[+15.995]LPPHPGHPGYINFS[+79.966]YEVLTPLKW[+15.995]YQSMIRHPYP.S		P[+16], S[+80], W[+16]	856.014	5	4276.04	4275.04	1	0.1	17	Non	636.69	636.69	0.4	8.95	1206	>sp|P02817|AMELX_BOVIN Amelogenin, X isoform OS=Bos taurus OX=9913 GN=AMELX PE=1 SV=2	1	hf1_10472_ebo_26_1_261219.ScanId;v=1;d1=24551.24551.5	controllerType=0 controllerNumber=1 scan=24551	51.8431
35288:5	1	S.MPLPPHPGHPGYINFS[+79.966]YEVLTPLKW[+15.995]YQ[+0.984]SMIRHPYP.S		Q[+1], S[+80], W[+16]	853.016	5	4261.05	4260.03	1	4.8	17	Non	655.04	655.04	0	10.78	1206	>sp|P02817|AMELX_BOVIN Amelogenin, X isoform OS=Bos taurus OX=9913 GN=AMELX PE=1 SV=2	1	hf1_10472_ebo_26_1_261219.ScanId;v=1;d1=26105.26105.5	controllerType=0 controllerNumber=1 scan=26105	54.6304
46258:5	1	S.MP[+15.995]LPPHPGHPGYINFS[+79.966]YEVLTPLKWYQSM[+15.995]IRHPYP.S		M[+16], P[+16], S[+80]	855.821	5	4275.07	4275.04	0	8.3	17	Non	661.91	661.91	10.65	10.51	1206	>sp|P02817|AMELX_BOVIN Amelogenin, X isoform OS=Bos taurus OX=9913 GN=AMELX PE=1 SV=2	1	hf1_10472_ebo_26_1_261219.ScanId;v=1;d1=34399.34399.5	controllerType=0 controllerNumber=1 scan=34399	73.6397
35883:5	1	S.M[+15.995]PLPPHPGHP[+15.995]GYINFS[+79.966]YEVLTPLKWYQSMIRHPYP.S		M[+16], P[+16], S[+80]	855.819	5	4275.07	4275.04	0	6.7	17	Non	678.76	678.76	5.22	10.82	1206	>sp|P02817|AMELX_BOVIN Amelogenin, X isoform OS=Bos taurus OX=9913 GN=AMELX PE=1 SV=2	1	hf1_10472_ebo_26_1_261219.ScanId;v=1;d1=26501.26501.5	controllerType=0 controllerNumber=1 scan=26501	55.3354
33306:5	1	S.MP[+15.995]LPPHPGHPGYINFS[+79.966]YEVLTPLKWYQSM[+15.995]IRHPYP.S		M[+16], P[+16], S[+80]	856.017	5	4276.05	4275.04	1	2.8	17	Non	727.04	727.04	1.8	11.35	1206	>sp|P02817|AMELX_BOVIN Amelogenin, X isoform OS=Bos taurus OX=9913 GN=AMELX PE=1 SV=2	1	hf1_10472_ebo_26_1_261219.ScanId;v=1;d1=24750.24750.5	controllerType=0 controllerNumber=1 scan=24750	52.1987
37552:4	1	S.M[+15.995]PLPPHPGHPGYINFS[+79.966]YEVLTPLKWYQ[+0.984]SMIRHPYP.S		M[+16], Q[+1], S[+80]	1065.77	4	4260.06	4260.03	0	6.8	17	Non	728.13	728.13	23.57	10.97	1206	>sp|P02817|AMELX_BOVIN Amelogenin, X isoform OS=Bos taurus OX=9913 GN=AMELX PE=1 SV=2	1	hf1_10472_ebo_26_1_261219.ScanId;v=1;d1=27595.27595.4	controllerType=0 controllerNumber=1 scan=27595	57.2885
[truncated: 2,023 more rows]

## Sheet: Proteins
Protein Rank	Description	|Log Prob|	Best |Log Prob|	Best score	Total Intensity	# of spectra	# of unique peptides	# of mod peptides	Coverage %	# AA's in protein	Protein DB number
[truncated: 4 more rows]
